# Supplementary material for: Basic chemical compositions combination rules and quantitative criterion of red beds
Source: Copernicus journal article supplement (doi:10.5194/egusphere-2023-2590), 2024-01-29
Supplement: Supplementary file 2 [file Supplementary Table 10-black-shale_EarthChem.xlsx]

## Sheet: Data
EarthChem Download: Wednesday, May. 10, 2023 7:13:12 am
Search Criteria:
Material	sedimentary
Rock Name	black-shale
SAMPLE ID	IGSN	SOURCE	DOI	TITLE	JOURNAL	AUTHOR	CRUISEID	LATITUDE	LONGITUDE	LOC PREC	MIN AGE	AGE	MAX AGE	METHOD	MATERIAL	TYPE	COMPOSITION	ROCK NAME	MINERAL	SIO2	TIO2	AL2O3	FE2O3	FEO	MNO	MGO	CAO	NA2O	K2O	P2O5	H2O_M	H2O_P	SI	FE	MN	NI	CO	CU	CD	ZN	AS	AG	AL	CA	MG	LA	CE	ND	SM
AKF172		USGS		Geochemistry of rock samples from the National Geochemical Database: U.S. Geological Survey, Reston, VA.	U.S. Geological Survey	USGS		40.9225	-117.317	0.01				AAS	SEDIMENTARY	UNKNOWN	UNKNOWN	BLACK-SHALE																				60		50		0.2
AKF172		USGS		Geochemistry of rock samples from the National Geochemical Database: U.S. Geological Survey, Reston, VA.	U.S. Geological Survey	USGS		40.9225	-117.317	0.01				COL	SEDIMENTARY	UNKNOWN	UNKNOWN	BLACK-SHALE																							600
AKF172		USGS		Geochemistry of rock samples from the National Geochemical Database: U.S. Geological Survey, Reston, VA.	U.S. Geological Survey	USGS		40.9225	-117.317	0.01				ES	SEDIMENTARY	UNKNOWN	UNKNOWN	BLACK-SHALE																2	50	30		50			700			0.7	0.3
AKF194		USGS		Geochemistry of rock samples from the National Geochemical Database: U.S. Geological Survey, Reston, VA.	U.S. Geological Survey	USGS		40.9303	-117.321	0.01				AAS	SEDIMENTARY	UNKNOWN	UNKNOWN	BLACK-SHALE																				110		120		60
AKF194		USGS		Geochemistry of rock samples from the National Geochemical Database: U.S. Geological Survey, Reston, VA.	U.S. Geological Survey	USGS		40.9303	-117.321	0.01				COL	SEDIMENTARY	UNKNOWN	UNKNOWN	BLACK-SHALE																							60
AKF194		USGS		Geochemistry of rock samples from the National Geochemical Database: U.S. Geological Survey, Reston, VA.	U.S. Geological Survey	USGS		40.9303	-117.321	0.01				ES	SEDIMENTARY	UNKNOWN	UNKNOWN	BLACK-SHALE																0.3	100	20		50		200	200	100		1.5	0.3
BAF153		USGS		Geochemistry of rock samples from the National Geochemical Database: U.S. Geological Survey, Reston, VA.	U.S. Geological Survey	USGS		61.7614	-141.832	0.01				ES	SEDIMENTARY	UNKNOWN	UNKNOWN	BLACK-SHALE																3	1000	15									0.5
BGY184		USGS		Geochemistry of rock samples from the National Geochemical Database: U.S. Geological Survey, Reston, VA.	U.S. Geological Survey	USGS		44.1433	-110.609	0.01	55	55	55	AAS	SEDIMENTARY	UNKNOWN	UNKNOWN	BLACK-SHALE
BGY184		USGS		Geochemistry of rock samples from the National Geochemical Database: U.S. Geological Survey, Reston, VA.	U.S. Geological Survey	USGS		44.1433	-110.609	0.01	55	55	55	ES	SEDIMENTARY	UNKNOWN	UNKNOWN	BLACK-SHALE																1	500	7		7				0.5		2	0.5	70
BGY185		USGS		Geochemistry of rock samples from the National Geochemical Database: U.S. Geological Survey, Reston, VA.	U.S. Geological Survey	USGS		44.1422	-110.609	0.01	55	55	55	AAS	SEDIMENTARY	UNKNOWN	UNKNOWN	BLACK-SHALE
BGY185		USGS		Geochemistry of rock samples from the National Geochemical Database: U.S. Geological Survey, Reston, VA.	U.S. Geological Survey	USGS		44.1422	-110.609	0.01	55	55	55	ES	SEDIMENTARY	UNKNOWN	UNKNOWN	BLACK-SHALE																0.3	700	5		5						0.7	0.1	30
BGY196		USGS		Geochemistry of rock samples from the National Geochemical Database: U.S. Geological Survey, Reston, VA.	U.S. Geological Survey	USGS		44.1403	-110.61	0.01	55	55	55	AAS	SEDIMENTARY	UNKNOWN	UNKNOWN	BLACK-SHALE
BGY196		USGS		Geochemistry of rock samples from the National Geochemical Database: U.S. Geological Survey, Reston, VA.	U.S. Geological Survey	USGS		44.1403	-110.61	0.01	55	55	55	ES	SEDIMENTARY	UNKNOWN	UNKNOWN	BLACK-SHALE																0.5	50	5		5						5	0.2	50
CAK008		USGS		Geochemistry of rock samples from the National Geochemical Database: U.S. Geological Survey, Reston, VA.	U.S. Geological Survey	USGS		61.9419	-141.396	0.01	71	71	71	ES	SEDIMENTARY	UNKNOWN	UNKNOWN	BLACK-SHALE																3	200	150	15	100		500		3		2	1.5	30
CBT022		USGS		Geochemistry of rock samples from the National Geochemical Database: U.S. Geological Survey, Reston, VA.	U.S. Geological Survey	USGS		68.0736	-163.006	0.01				AAS	SEDIMENTARY	UNKNOWN	UNKNOWN	BLACK-SHALE																				10		5
CBT022		USGS		Geochemistry of rock samples from the National Geochemical Database: U.S. Geological Survey, Reston, VA.	U.S. Geological Survey	USGS		68.0736	-163.006	0.01				ES	SEDIMENTARY	UNKNOWN	UNKNOWN	BLACK-SHALE																2	50	50		10				5			0.5	30
CBT028		USGS		Geochemistry of rock samples from the National Geochemical Database: U.S. Geological Survey, Reston, VA.	U.S. Geological Survey	USGS		68.1889	-163.106	0.01				AAS	SEDIMENTARY	UNKNOWN	UNKNOWN	BLACK-SHALE																				25		5
CBT028		USGS		Geochemistry of rock samples from the National Geochemical Database: U.S. Geological Survey, Reston, VA.	U.S. Geological Survey	USGS		68.1889	-163.106	0.01				ES	SEDIMENTARY	UNKNOWN	UNKNOWN	BLACK-SHALE																10	30	70		70				15			0.5	70
CBX527		USGS		Geochemistry of rock samples from the National Geochemical Database: U.S. Geological Survey, Reston, VA.	U.S. Geological Survey	USGS		68.8069	-148.34	0.01	59	59	59	AAS	SEDIMENTARY	UNKNOWN	UNKNOWN	BLACK-SHALE																						360
CBX527		USGS		Geochemistry of rock samples from the National Geochemical Database: U.S. Geological Survey, Reston, VA.	U.S. Geological Survey	USGS		68.8069	-148.34	0.01	59	59	59	ES	SEDIMENTARY	UNKNOWN	UNKNOWN	BLACK-SHALE																3	100	300		150		500		2		20	1	50
CBX528		USGS		Geochemistry of rock samples from the National Geochemical Database: U.S. Geological Survey, Reston, VA.	U.S. Geological Survey	USGS		68.8069	-148.343	0.01	44	44	44	AAS	SEDIMENTARY	UNKNOWN	UNKNOWN	BLACK-SHALE																						1900
CBX528		USGS		Geochemistry of rock samples from the National Geochemical Database: U.S. Geological Survey, Reston, VA.	U.S. Geological Survey	USGS		68.8069	-148.343	0.01	44	44	44	ES	SEDIMENTARY	UNKNOWN	UNKNOWN	BLACK-SHALE																10	500	300	30	150		2000		3		5	1	50
CBX529		USGS		Geochemistry of rock samples from the National Geochemical Database: U.S. Geological Survey, Reston, VA.	U.S. Geological Survey	USGS		68.8069	-148.344	0.01	44	44	44	AAS	SEDIMENTARY	UNKNOWN	UNKNOWN	BLACK-SHALE																						360
CBX529		USGS		Geochemistry of rock samples from the National Geochemical Database: U.S. Geological Survey, Reston, VA.	U.S. Geological Survey	USGS		68.8069	-148.344	0.01	44	44	44	ES	SEDIMENTARY	UNKNOWN	UNKNOWN	BLACK-SHALE																10	1500	300	30	150		700				0.2	1.5	50
CBX533		USGS		Geochemistry of rock samples from the National Geochemical Database: U.S. Geological Survey, Reston, VA.	U.S. Geological Survey	USGS		68.8069	-148.344	0.01	44	44	44	AAS	SEDIMENTARY	UNKNOWN	UNKNOWN	BLACK-SHALE																						1300
CBX533		USGS		Geochemistry of rock samples from the National Geochemical Database: U.S. Geological Survey, Reston, VA.	U.S. Geological Survey	USGS		68.8069	-148.344	0.01	44	44	44	ES	SEDIMENTARY	UNKNOWN	UNKNOWN	BLACK-SHALE																7	500	200	20	200		2000		3		0.3	1.5	50
CBY989		USGS		Geochemistry of rock samples from the National Geochemical Database: U.S. Geological Survey, Reston, VA.	U.S. Geological Survey	USGS		67.6417	-157.377	0.01				AAS	SEDIMENTARY	UNKNOWN	UNKNOWN	BLACK-SHALE																				100		10
CBY989		USGS		Geochemistry of rock samples from the National Geochemical Database: U.S. Geological Survey, Reston, VA.	U.S. Geological Survey	USGS		67.6417	-157.377	0.01				ES	SEDIMENTARY	UNKNOWN	UNKNOWN	BLACK-SHALE																1	70			200				5		0.3	0.7	100
CCA519		USGS		Geochemistry of rock samples from the National Geochemical Database: U.S. Geological Survey, Reston, VA.	U.S. Geological Survey	USGS		68.4792	-149.233	0.01	56	56	56	AAS	SEDIMENTARY	UNKNOWN	UNKNOWN	BLACK-SHALE																						320
CCA519		USGS		Geochemistry of rock samples from the National Geochemical Database: U.S. Geological Survey, Reston, VA.	U.S. Geological Survey	USGS		68.4792	-149.233	0.01	56	56	56	ES	SEDIMENTARY	UNKNOWN	UNKNOWN	BLACK-SHALE																3	500	150	15	300		500		2		20	0.7	70
CCA522		USGS		Geochemistry of rock samples from the National Geochemical Database: U.S. Geological Survey, Reston, VA.	U.S. Geological Survey	USGS		68.1778	-148.382	0.01	55	55	55	AAS	SEDIMENTARY	UNKNOWN	UNKNOWN	BLACK-SHALE																						160
CCA522		USGS		Geochemistry of rock samples from the National Geochemical Database: U.S. Geological Survey, Reston, VA.	U.S. Geological Survey	USGS		68.1778	-148.382	0.01	55	55	55	ES	SEDIMENTARY	UNKNOWN	UNKNOWN	BLACK-SHALE																15	500	100	20	100						0.1	2	70
CCA526		USGS		Geochemistry of rock samples from the National Geochemical Database: U.S. Geological Survey, Reston, VA.	U.S. Geological Survey	USGS		68.2167	-147.567	0.01	55	55	55	AAS	SEDIMENTARY	UNKNOWN	UNKNOWN	BLACK-SHALE																						120
CCA526		USGS		Geochemistry of rock samples from the National Geochemical Database: U.S. Geological Survey, Reston, VA.	U.S. Geological Survey	USGS		68.2167	-147.567	0.01	55	55	55	ES	SEDIMENTARY	UNKNOWN	UNKNOWN	BLACK-SHALE																15	700	200	70	100		200				3	5	30
CCA527		USGS		Geochemistry of rock samples from the National Geochemical Database: U.S. Geological Survey, Reston, VA.	U.S. Geological Survey	USGS		68.2167	-147.567	0.01	55	55	55	AAS	SEDIMENTARY	UNKNOWN	UNKNOWN	BLACK-SHALE																						110
CCA527		USGS		Geochemistry of rock samples from the National Geochemical Database: U.S. Geological Survey, Reston, VA.	U.S. Geological Survey	USGS		68.2167	-147.567	0.01	55	55	55	ES	SEDIMENTARY	UNKNOWN	UNKNOWN	BLACK-SHALE																15	1000	150	20	100						0.5	1.5	100
CCA528		USGS		Geochemistry of rock samples from the National Geochemical Database: U.S. Geological Survey, Reston, VA.	U.S. Geological Survey	USGS		68.2139	-147.579	0.01	55	55	55	AAS	SEDIMENTARY	UNKNOWN	UNKNOWN	BLACK-SHALE																						120
CCA528		USGS		Geochemistry of rock samples from the National Geochemical Database: U.S. Geological Survey, Reston, VA.	U.S. Geological Survey	USGS		68.2139	-147.579	0.01	55	55	55	ES	SEDIMENTARY	UNKNOWN	UNKNOWN	BLACK-SHALE																15	1000	150	50	200						10	7	20
CCA529		USGS		Geochemistry of rock samples from the National Geochemical Database: U.S. Geological Survey, Reston, VA.	U.S. Geological Survey	USGS		68.225	-147.539	0.01	55	55	55	AAS	SEDIMENTARY	UNKNOWN	UNKNOWN	BLACK-SHALE																						120
CCA529		USGS		Geochemistry of rock samples from the National Geochemical Database: U.S. Geological Survey, Reston, VA.	U.S. Geological Survey	USGS		68.225	-147.539	0.01	55	55	55	ES	SEDIMENTARY	UNKNOWN	UNKNOWN	BLACK-SHALE																15	1000	150	50	100		200				0.3	3	70
CCA530		USGS		Geochemistry of rock samples from the National Geochemical Database: U.S. Geological Survey, Reston, VA.	U.S. Geological Survey	USGS		68.225	-147.539	0.01	55	55	55	AAS	SEDIMENTARY	UNKNOWN	UNKNOWN	BLACK-SHALE																						120
CCA530		USGS		Geochemistry of rock samples from the National Geochemical Database: U.S. Geological Survey, Reston, VA.	U.S. Geological Survey	USGS		68.225	-147.539	0.01	55	55	55	ES	SEDIMENTARY	UNKNOWN	UNKNOWN	BLACK-SHALE																15	1000	100	15	70		200				0.2	2	70
CCA531		USGS		Geochemistry of rock samples from the National Geochemical Database: U.S. Geological Survey, Reston, VA.	U.S. Geological Survey	USGS		68.225	-147.539	0.01	55	55	55	AAS	SEDIMENTARY	UNKNOWN	UNKNOWN	BLACK-SHALE																						120
CCA531		USGS		Geochemistry of rock samples from the National Geochemical Database: U.S. Geological Survey, Reston, VA.	U.S. Geological Survey	USGS		68.225	-147.539	0.01	55	55	55	ES	SEDIMENTARY	UNKNOWN	UNKNOWN	BLACK-SHALE																15	2000	150	100	100		300				0.2	3	70
CCA532		USGS		Geochemistry of rock samples from the National Geochemical Database: U.S. Geological Survey, Reston, VA.	U.S. Geological Survey	USGS		68.225	-147.539	0.01	55	55	55	AAS	SEDIMENTARY	UNKNOWN	UNKNOWN	BLACK-SHALE																						120
CCA532		USGS		Geochemistry of rock samples from the National Geochemical Database: U.S. Geological Survey, Reston, VA.	U.S. Geological Survey	USGS		68.225	-147.539	0.01	55	55	55	ES	SEDIMENTARY	UNKNOWN	UNKNOWN	BLACK-SHALE																15	1500	150	50	100		200				0.2	2	100
CCA533		USGS		Geochemistry of rock samples from the National Geochemical Database: U.S. Geological Survey, Reston, VA.	U.S. Geological Survey	USGS		68.225	-147.539	0.01	55	55	55	AAS	SEDIMENTARY	UNKNOWN	UNKNOWN	BLACK-SHALE																						120
CCA533		USGS		Geochemistry of rock samples from the National Geochemical Database: U.S. Geological Survey, Reston, VA.	U.S. Geological Survey	USGS		68.225	-147.539	0.01	55	55	55	ES	SEDIMENTARY	UNKNOWN	UNKNOWN	BLACK-SHALE																15	1500	100	30	100		300				0.2	2	70
CCA534		USGS		Geochemistry of rock samples from the National Geochemical Database: U.S. Geological Survey, Reston, VA.	U.S. Geological Survey	USGS		68.225	-147.539	0.01	55	55	55	AAS	SEDIMENTARY	UNKNOWN	UNKNOWN	BLACK-SHALE																						120
CCA534		USGS		Geochemistry of rock samples from the National Geochemical Database: U.S. Geological Survey, Reston, VA.	U.S. Geological Survey	USGS		68.225	-147.539	0.01	55	55	55	ES	SEDIMENTARY	UNKNOWN	UNKNOWN	BLACK-SHALE																15	1500	100	20	70		300				0.3	2	70
CCA535		USGS		Geochemistry of rock samples from the National Geochemical Database: U.S. Geological Survey, Reston, VA.	U.S. Geological Survey	USGS		68.225	-147.539	0.01	55	55	55	AAS	SEDIMENTARY	UNKNOWN	UNKNOWN	BLACK-SHALE																						120
CCA535		USGS		Geochemistry of rock samples from the National Geochemical Database: U.S. Geological Survey, Reston, VA.	U.S. Geological Survey	USGS		68.225	-147.539	0.01	55	55	55	ES	SEDIMENTARY	UNKNOWN	UNKNOWN	BLACK-SHALE																15	2000	150	30	100		300				0.3	2	70
CCA536		USGS		Geochemistry of rock samples from the National Geochemical Database: U.S. Geological Survey, Reston, VA.	U.S. Geological Survey	USGS		68.225	-147.539	0.01	55	55	55	AAS	SEDIMENTARY	UNKNOWN	UNKNOWN	BLACK-SHALE																						120
CCA536		USGS		Geochemistry of rock samples from the National Geochemical Database: U.S. Geological Survey, Reston, VA.	U.S. Geological Survey	USGS		68.225	-147.539	0.01	55	55	55	ES	SEDIMENTARY	UNKNOWN	UNKNOWN	BLACK-SHALE																10	1500	70	15	70		200				0.2	1.5	50
CCA538		USGS		Geochemistry of rock samples from the National Geochemical Database: U.S. Geological Survey, Reston, VA.	U.S. Geological Survey	USGS		68.225	-147.539	0.01	55	55	55	AAS	SEDIMENTARY	UNKNOWN	UNKNOWN	BLACK-SHALE																						120
CCA538		USGS		Geochemistry of rock samples from the National Geochemical Database: U.S. Geological Survey, Reston, VA.	U.S. Geological Survey	USGS		68.225	-147.539	0.01	55	55	55	ES	SEDIMENTARY	UNKNOWN	UNKNOWN	BLACK-SHALE																15	1500	150	30	200		300				0.2	2	70
CCA539		USGS		Geochemistry of rock samples from the National Geochemical Database: U.S. Geological Survey, Reston, VA.	U.S. Geological Survey	USGS		68.225	-147.539	0.01	55	55	55	AAS	SEDIMENTARY	UNKNOWN	UNKNOWN	BLACK-SHALE																						120
CCA539		USGS		Geochemistry of rock samples from the National Geochemical Database: U.S. Geological Survey, Reston, VA.	U.S. Geological Survey	USGS		68.225	-147.539	0.01	55	55	55	ES	SEDIMENTARY	UNKNOWN	UNKNOWN	BLACK-SHALE																15	1500	100	15	200		200				0.2	3	50
CCA541		USGS		Geochemistry of rock samples from the National Geochemical Database: U.S. Geological Survey, Reston, VA.	U.S. Geological Survey	USGS		68.225	-147.539	0.01	55	55	55	AAS	SEDIMENTARY	UNKNOWN	UNKNOWN	BLACK-SHALE																						130
CCA541		USGS		Geochemistry of rock samples from the National Geochemical Database: U.S. Geological Survey, Reston, VA.	U.S. Geological Survey	USGS		68.225	-147.539	0.01	55	55	55	ES	SEDIMENTARY	UNKNOWN	UNKNOWN	BLACK-SHALE																15	1000	100	15	70		300				0.1	2	70
CCA542		USGS		Geochemistry of rock samples from the National Geochemical Database: U.S. Geological Survey, Reston, VA.	U.S. Geological Survey	USGS		68.225	-147.539	0.01	55	55	55	AAS	SEDIMENTARY	UNKNOWN	UNKNOWN	BLACK-SHALE																						120
CCA542		USGS		Geochemistry of rock samples from the National Geochemical Database: U.S. Geological Survey, Reston, VA.	U.S. Geological Survey	USGS		68.225	-147.539	0.01	55	55	55	ES	SEDIMENTARY	UNKNOWN	UNKNOWN	BLACK-SHALE																15	1500	150	50	100		200				0.2	3	70
CCA543		USGS		Geochemistry of rock samples from the National Geochemical Database: U.S. Geological Survey, Reston, VA.	U.S. Geological Survey	USGS		68.225	-147.539	0.01	55	55	55	AAS	SEDIMENTARY	UNKNOWN	UNKNOWN	BLACK-SHALE																						130
CCA543		USGS		Geochemistry of rock samples from the National Geochemical Database: U.S. Geological Survey, Reston, VA.	U.S. Geological Survey	USGS		68.225	-147.539	0.01	55	55	55	ES	SEDIMENTARY	UNKNOWN	UNKNOWN	BLACK-SHALE																15	2000	200	70	150		300				0.2	5	100
CCA547		USGS		Geochemistry of rock samples from the National Geochemical Database: U.S. Geological Survey, Reston, VA.	U.S. Geological Survey	USGS		68.225	-147.539	0.01	55	55	55	AAS	SEDIMENTARY	UNKNOWN	UNKNOWN	BLACK-SHALE																						120
CCA547		USGS		Geochemistry of rock samples from the National Geochemical Database: U.S. Geological Survey, Reston, VA.	U.S. Geological Survey	USGS		68.225	-147.539	0.01	55	55	55	ES	SEDIMENTARY	UNKNOWN	UNKNOWN	BLACK-SHALE																10	1500	70	15	70		200				0.2	2	70
CCA548		USGS		Geochemistry of rock samples from the National Geochemical Database: U.S. Geological Survey, Reston, VA.	U.S. Geological Survey	USGS		68.225	-147.539	0.01	55	55	55	AAS	SEDIMENTARY	UNKNOWN	UNKNOWN	BLACK-SHALE																						130
CCA548		USGS		Geochemistry of rock samples from the National Geochemical Database: U.S. Geological Survey, Reston, VA.	U.S. Geological Survey	USGS		68.225	-147.539	0.01	55	55	55	ES	SEDIMENTARY	UNKNOWN	UNKNOWN	BLACK-SHALE																15	1500	150	20	100		300				0.3	3	70
CCA549		USGS		Geochemistry of rock samples from the National Geochemical Database: U.S. Geological Survey, Reston, VA.	U.S. Geological Survey	USGS		68.2222	-147.55	0.01	55	55	55	AAS	SEDIMENTARY	UNKNOWN	UNKNOWN	BLACK-SHALE																						120
CCA549		USGS		Geochemistry of rock samples from the National Geochemical Database: U.S. Geological Survey, Reston, VA.	U.S. Geological Survey	USGS		68.2222	-147.55	0.01	55	55	55	ES	SEDIMENTARY	UNKNOWN	UNKNOWN	BLACK-SHALE																15	1500	150	50	150		200				1	3	30
CCA550		USGS		Geochemistry of rock samples from the National Geochemical Database: U.S. Geological Survey, Reston, VA.	U.S. Geological Survey	USGS		68.2222	-147.55	0.01	55	55	55	AAS	SEDIMENTARY	UNKNOWN	UNKNOWN	BLACK-SHALE																						130
CCA550		USGS		Geochemistry of rock samples from the National Geochemical Database: U.S. Geological Survey, Reston, VA.	U.S. Geological Survey	USGS		68.2222	-147.55	0.01	55	55	55	ES	SEDIMENTARY	UNKNOWN	UNKNOWN	BLACK-SHALE																15	1500	150	50	150		200				0.7	3	50
CCA551		USGS		Geochemistry of rock samples from the National Geochemical Database: U.S. Geological Survey, Reston, VA.	U.S. Geological Survey	USGS		68.2222	-147.55	0.01	55	55	55	AAS	SEDIMENTARY	UNKNOWN	UNKNOWN	BLACK-SHALE																						120
CCA551		USGS		Geochemistry of rock samples from the National Geochemical Database: U.S. Geological Survey, Reston, VA.	U.S. Geological Survey	USGS		68.2222	-147.55	0.01	55	55	55	ES	SEDIMENTARY	UNKNOWN	UNKNOWN	BLACK-SHALE																15	1000	100	15	100		200				0.3	2	70
CCA554		USGS		Geochemistry of rock samples from the National Geochemical Database: U.S. Geological Survey, Reston, VA.	U.S. Geological Survey	USGS		68.2222	-147.55	0.01	55	55	55	AAS	SEDIMENTARY	UNKNOWN	UNKNOWN	BLACK-SHALE																						110
CCA554		USGS		Geochemistry of rock samples from the National Geochemical Database: U.S. Geological Survey, Reston, VA.	U.S. Geological Survey	USGS		68.2222	-147.55	0.01	55	55	55	ES	SEDIMENTARY	UNKNOWN	UNKNOWN	BLACK-SHALE																15	1500	100	15	100		200				0.5	3	70
CCA555		USGS		Geochemistry of rock samples from the National Geochemical Database: U.S. Geological Survey, Reston, VA.	U.S. Geological Survey	USGS		68.2222	-147.55	0.01	55	55	55	AAS	SEDIMENTARY	UNKNOWN	UNKNOWN	BLACK-SHALE																						110
CCA555		USGS		Geochemistry of rock samples from the National Geochemical Database: U.S. Geological Survey, Reston, VA.	U.S. Geological Survey	USGS		68.2222	-147.55	0.01	55	55	55	ES	SEDIMENTARY	UNKNOWN	UNKNOWN	BLACK-SHALE																15	1500	100	15	70		200				0.2	2	70
CCA556		USGS		Geochemistry of rock samples from the National Geochemical Database: U.S. Geological Survey, Reston, VA.	U.S. Geological Survey	USGS		68.2222	-147.55	0.01	55	55	55	AAS	SEDIMENTARY	UNKNOWN	UNKNOWN	BLACK-SHALE																						120
CCA556		USGS		Geochemistry of rock samples from the National Geochemical Database: U.S. Geological Survey, Reston, VA.	U.S. Geological Survey	USGS		68.2222	-147.55	0.01	55	55	55	ES	SEDIMENTARY	UNKNOWN	UNKNOWN	BLACK-SHALE																5	1500	30	10	50		200				0.1	1.5	50
CCA557		USGS		Geochemistry of rock samples from the National Geochemical Database: U.S. Geological Survey, Reston, VA.	U.S. Geological Survey	USGS		68.2222	-147.55	0.01	55	55	55	AAS	SEDIMENTARY	UNKNOWN	UNKNOWN	BLACK-SHALE																						130
CCA557		USGS		Geochemistry of rock samples from the National Geochemical Database: U.S. Geological Survey, Reston, VA.	U.S. Geological Survey	USGS		68.2222	-147.55	0.01	55	55	55	ES	SEDIMENTARY	UNKNOWN	UNKNOWN	BLACK-SHALE																15	1500	150	20	70		200				0.2	2	70
CCA558		USGS		Geochemistry of rock samples from the National Geochemical Database: U.S. Geological Survey, Reston, VA.	U.S. Geological Survey	USGS		68.2222	-147.55	0.01	55	55	55	AAS	SEDIMENTARY	UNKNOWN	UNKNOWN	BLACK-SHALE																						130
CCA558		USGS		Geochemistry of rock samples from the National Geochemical Database: U.S. Geological Survey, Reston, VA.	U.S. Geological Survey	USGS		68.2222	-147.55	0.01	55	55	55	ES	SEDIMENTARY	UNKNOWN	UNKNOWN	BLACK-SHALE																10	1000	70	15	70		200				0.1	1.5	50
CCA559		USGS		Geochemistry of rock samples from the National Geochemical Database: U.S. Geological Survey, Reston, VA.	U.S. Geological Survey	USGS		68.2222	-147.55	0.01	55	55	55	AAS	SEDIMENTARY	UNKNOWN	UNKNOWN	BLACK-SHALE																						120
CCA559		USGS		Geochemistry of rock samples from the National Geochemical Database: U.S. Geological Survey, Reston, VA.	U.S. Geological Survey	USGS		68.2222	-147.55	0.01	55	55	55	ES	SEDIMENTARY	UNKNOWN	UNKNOWN	BLACK-SHALE																15	1500	150	30	100		200				0.2	2	70
CCA560		USGS		Geochemistry of rock samples from the National Geochemical Database: U.S. Geological Survey, Reston, VA.	U.S. Geological Survey	USGS		68.2222	-147.55	0.01	55	55	55	AAS	SEDIMENTARY	UNKNOWN	UNKNOWN	BLACK-SHALE																						120
CCA560		USGS		Geochemistry of rock samples from the National Geochemical Database: U.S. Geological Survey, Reston, VA.	U.S. Geological Survey	USGS		68.2222	-147.55	0.01	55	55	55	ES	SEDIMENTARY	UNKNOWN	UNKNOWN	BLACK-SHALE																15	1000	100	15	100		200				0.5	2	70
CCA561		USGS		Geochemistry of rock samples from the National Geochemical Database: U.S. Geological Survey, Reston, VA.	U.S. Geological Survey	USGS		68.2222	-147.55	0.01	55	55	55	AAS	SEDIMENTARY	UNKNOWN	UNKNOWN	BLACK-SHALE																						110
CCA561		USGS		Geochemistry of rock samples from the National Geochemical Database: U.S. Geological Survey, Reston, VA.	U.S. Geological Survey	USGS		68.2222	-147.55	0.01	55	55	55	ES	SEDIMENTARY	UNKNOWN	UNKNOWN	BLACK-SHALE																10	1000	100	15	100		200				0.2	1.5	70
CCA562		USGS		Geochemistry of rock samples from the National Geochemical Database: U.S. Geological Survey, Reston, VA.	U.S. Geological Survey	USGS		68.2222	-147.55	0.01	55	55	55	AAS	SEDIMENTARY	UNKNOWN	UNKNOWN	BLACK-SHALE																						120
CCA562		USGS		Geochemistry of rock samples from the National Geochemical Database: U.S. Geological Survey, Reston, VA.	U.S. Geological Survey	USGS		68.2222	-147.55	0.01	55	55	55	ES	SEDIMENTARY	UNKNOWN	UNKNOWN	BLACK-SHALE																15	1500	200	30	150		200				0.3	3	70
CCA563		USGS		Geochemistry of rock samples from the National Geochemical Database: U.S. Geological Survey, Reston, VA.	U.S. Geological Survey	USGS		68.2222	-147.55	0.01	55	55	55	AAS	SEDIMENTARY	UNKNOWN	UNKNOWN	BLACK-SHALE																						110
CCA563		USGS		Geochemistry of rock samples from the National Geochemical Database: U.S. Geological Survey, Reston, VA.	U.S. Geological Survey	USGS		68.2222	-147.55	0.01	55	55	55	ES	SEDIMENTARY	UNKNOWN	UNKNOWN	BLACK-SHALE																15	1500	150	15	100		200				0.5	1.5	70
CCA565		USGS		Geochemistry of rock samples from the National Geochemical Database: U.S. Geological Survey, Reston, VA.	U.S. Geological Survey	USGS		68.2222	-147.55	0.01	55	55	55	AAS	SEDIMENTARY	UNKNOWN	UNKNOWN	BLACK-SHALE																						130
CCA565		USGS		Geochemistry of rock samples from the National Geochemical Database: U.S. Geological Survey, Reston, VA.	U.S. Geological Survey	USGS		68.2222	-147.55	0.01	55	55	55	ES	SEDIMENTARY	UNKNOWN	UNKNOWN	BLACK-SHALE																15	1500	200	70	150		200				0.2	3	70
CCA566		USGS		Geochemistry of rock samples from the National Geochemical Database: U.S. Geological Survey, Reston, VA.	U.S. Geological Survey	USGS		68.2222	-147.55	0.01	55	55	55	AAS	SEDIMENTARY	UNKNOWN	UNKNOWN	BLACK-SHALE																						140
CCA566		USGS		Geochemistry of rock samples from the National Geochemical Database: U.S. Geological Survey, Reston, VA.	U.S. Geological Survey	USGS		68.2222	-147.55	0.01	55	55	55	ES	SEDIMENTARY	UNKNOWN	UNKNOWN	BLACK-SHALE																15	1000	200	50	100		200				0.1	3	70
CCA567		USGS		Geochemistry of rock samples from the National Geochemical Database: U.S. Geological Survey, Reston, VA.	U.S. Geological Survey	USGS		68.2222	-147.55	0.01	55	55	55	AAS	SEDIMENTARY	UNKNOWN	UNKNOWN	BLACK-SHALE																						140
CCA567		USGS		Geochemistry of rock samples from the National Geochemical Database: U.S. Geological Survey, Reston, VA.	U.S. Geological Survey	USGS		68.2222	-147.55	0.01	55	55	55	ES	SEDIMENTARY	UNKNOWN	UNKNOWN	BLACK-SHALE																15	1000	100	20	70		200				0.1	2	70
CCA568		USGS		Geochemistry of rock samples from the National Geochemical Database: U.S. Geological Survey, Reston, VA.	U.S. Geological Survey	USGS		68.2222	-147.55	0.01	55	55	55	AAS	SEDIMENTARY	UNKNOWN	UNKNOWN	BLACK-SHALE																						130
CCA568		USGS		Geochemistry of rock samples from the National Geochemical Database: U.S. Geological Survey, Reston, VA.	U.S. Geological Survey	USGS		68.2222	-147.55	0.01	55	55	55	ES	SEDIMENTARY	UNKNOWN	UNKNOWN	BLACK-SHALE																15	1500	150	50	150		200				0.1	3	70
CCA569		USGS		Geochemistry of rock samples from the National Geochemical Database: U.S. Geological Survey, Reston, VA.	U.S. Geological Survey	USGS		68.22	-147.556	0.01	55	55	55	AAS	SEDIMENTARY	UNKNOWN	UNKNOWN	BLACK-SHALE																						140
CCA569		USGS		Geochemistry of rock samples from the National Geochemical Database: U.S. Geological Survey, Reston, VA.	U.S. Geological Survey	USGS		68.22	-147.556	0.01	55	55	55	ES	SEDIMENTARY	UNKNOWN	UNKNOWN	BLACK-SHALE																10	1500	70	15	70		200				0.1	2	50
CCA570		USGS		Geochemistry of rock samples from the National Geochemical Database: U.S. Geological Survey, Reston, VA.	U.S. Geological Survey	USGS		68.22	-147.556	0.01	55	55	55	AAS	SEDIMENTARY	UNKNOWN	UNKNOWN	BLACK-SHALE																						140
CCA570		USGS		Geochemistry of rock samples from the National Geochemical Database: U.S. Geological Survey, Reston, VA.	U.S. Geological Survey	USGS		68.22	-147.556	0.01	55	55	55	ES	SEDIMENTARY	UNKNOWN	UNKNOWN	BLACK-SHALE																15	1500	150	50	150		200				0.2	2	70
CCA571		USGS		Geochemistry of rock samples from the National Geochemical Database: U.S. Geological Survey, Reston, VA.	U.S. Geological Survey	USGS		68.22	-147.556	0.01	55	55	55	AAS	SEDIMENTARY	UNKNOWN	UNKNOWN	BLACK-SHALE																						150
CCA571		USGS		Geochemistry of rock samples from the National Geochemical Database: U.S. Geological Survey, Reston, VA.	U.S. Geological Survey	USGS		68.22	-147.556	0.01	55	55	55	ES	SEDIMENTARY	UNKNOWN	UNKNOWN	BLACK-SHALE																15	1500	100	15	70		200				0.1	3	70
CCA572		USGS		Geochemistry of rock samples from the National Geochemical Database: U.S. Geological Survey, Reston, VA.	U.S. Geological Survey	USGS		68.22	-147.556	0.01	55	55	55	AAS	SEDIMENTARY	UNKNOWN	UNKNOWN	BLACK-SHALE																						130
CCA572		USGS		Geochemistry of rock samples from the National Geochemical Database: U.S. Geological Survey, Reston, VA.	U.S. Geological Survey	USGS		68.22	-147.556	0.01	55	55	55	ES	SEDIMENTARY	UNKNOWN	UNKNOWN	BLACK-SHALE																15	2000	100	15	50		200				0.5	2	50
CCA573		USGS		Geochemistry of rock samples from the National Geochemical Database: U.S. Geological Survey, Reston, VA.	U.S. Geological Survey	USGS		68.22	-147.556	0.01	55	55	55	AAS	SEDIMENTARY	UNKNOWN	UNKNOWN	BLACK-SHALE																						120
CCA573		USGS		Geochemistry of rock samples from the National Geochemical Database: U.S. Geological Survey, Reston, VA.	U.S. Geological Survey	USGS		68.22	-147.556	0.01	55	55	55	ES	SEDIMENTARY	UNKNOWN	UNKNOWN	BLACK-SHALE																15	1000	100	20	70		200				0.2	2	50
CCC936		USGS		Geochemistry of rock samples from the National Geochemical Database: U.S. Geological Survey, Reston, VA.	U.S. Geological Survey	USGS		68.7875	-148.317	0.01	59	59	59	AAS	SEDIMENTARY	UNKNOWN	UNKNOWN	BLACK-SHALE																						120
CCC936		USGS		Geochemistry of rock samples from the National Geochemical Database: U.S. Geological Survey, Reston, VA.	U.S. Geological Survey	USGS		68.7875	-148.317	0.01	59	59	59	ES	SEDIMENTARY	UNKNOWN	UNKNOWN	BLACK-SHALE																15	150	150	15	50		200				1	3
CCC939		USGS		Geochemistry of rock samples from the National Geochemical Database: U.S. Geological Survey, Reston, VA.	U.S. Geological Survey	USGS		68.8778	-147.75	0.01	59	59	59	AAS	SEDIMENTARY	UNKNOWN	UNKNOWN	BLACK-SHALE																						55
CCC939		USGS		Geochemistry of rock samples from the National Geochemical Database: U.S. Geological Survey, Reston, VA.	U.S. Geological Survey	USGS		68.8778	-147.75	0.01	59	59	59	ES	SEDIMENTARY	UNKNOWN	UNKNOWN	BLACK-SHALE																2	700	30		10		200				15	1
CCC942		USGS		Geochemistry of rock samples from the National Geochemical Database: U.S. Geological Survey, Reston, VA.	U.S. Geological Survey	USGS		68.8583	-148.375	0.01	56	56	56	AAS	SEDIMENTARY	UNKNOWN	UNKNOWN	BLACK-SHALE																						120
CCC942		USGS		Geochemistry of rock samples from the National Geochemical Database: U.S. Geological Survey, Reston, VA.	U.S. Geological Survey	USGS		68.8583	-148.375	0.01	56	56	56	ES	SEDIMENTARY	UNKNOWN	UNKNOWN	BLACK-SHALE																15	300	150	15	70		200				0.7	3	100
CCC943		USGS		Geochemistry of rock samples from the National Geochemical Database: U.S. Geological Survey, Reston, VA.	U.S. Geological Survey	USGS		68.8875	-148.267	0.01	56	56	56	AAS	SEDIMENTARY	UNKNOWN	UNKNOWN	BLACK-SHALE																						220
CCC943		USGS		Geochemistry of rock samples from the National Geochemical Database: U.S. Geological Survey, Reston, VA.	U.S. Geological Survey	USGS		68.8875	-148.267	0.01	56	56	56	ES	SEDIMENTARY	UNKNOWN	UNKNOWN	BLACK-SHALE																15	700	300	15	150		200				0.2	2	70
CCC944		USGS		Geochemistry of rock samples from the National Geochemical Database: U.S. Geological Survey, Reston, VA.	U.S. Geological Survey	USGS		68.9292	-148.217	0.01	56	56	56	AAS	SEDIMENTARY	UNKNOWN	UNKNOWN	BLACK-SHALE																						140
CCC944		USGS		Geochemistry of rock samples from the National Geochemical Database: U.S. Geological Survey, Reston, VA.	U.S. Geological Survey	USGS		68.9292	-148.217	0.01	56	56	56	ES	SEDIMENTARY	UNKNOWN	UNKNOWN	BLACK-SHALE																15	700	150	20	100		200				0.7	2	70
CCC945		USGS		Geochemistry of rock samples from the National Geochemical Database: U.S. Geological Survey, Reston, VA.	U.S. Geological Survey	USGS		68.4805	-149.208	0.01	56	56	56	AAS	SEDIMENTARY	UNKNOWN	UNKNOWN	BLACK-SHALE																						220
CCC945		USGS		Geochemistry of rock samples from the National Geochemical Database: U.S. Geological Survey, Reston, VA.	U.S. Geological Survey	USGS		68.4805	-149.208	0.01	56	56	56	ES	SEDIMENTARY	UNKNOWN	UNKNOWN	BLACK-SHALE																15	5000	300	100	200						5	2	70
CCC946		USGS		Geochemistry of rock samples from the National Geochemical Database: U.S. Geological Survey, Reston, VA.	U.S. Geological Survey	USGS		68.7083	-148.683	0.01	65	65	65	AAS	SEDIMENTARY	UNKNOWN	UNKNOWN	BLACK-SHALE																						200
CCC946		USGS		Geochemistry of rock samples from the National Geochemical Database: U.S. Geological Survey, Reston, VA.	U.S. Geological Survey	USGS		68.7083	-148.683	0.01	65	65	65	ES	SEDIMENTARY	UNKNOWN	UNKNOWN	BLACK-SHALE																15	2000	150	20	150						0.5	3	50
CCC947		USGS		Geochemistry of rock samples from the National Geochemical Database: U.S. Geological Survey, Reston, VA.	U.S. Geological Survey	USGS		68.7083	-148.683	0.01	65	65	65	AAS	SEDIMENTARY	UNKNOWN	UNKNOWN	BLACK-SHALE																						110
CCC947		USGS		Geochemistry of rock samples from the National Geochemical Database: U.S. Geological Survey, Reston, VA.	U.S. Geological Survey	USGS		68.7083	-148.683	0.01	65	65	65	ES	SEDIMENTARY	UNKNOWN	UNKNOWN	BLACK-SHALE																15	200	50	5	70				2		0.2	2	50
CCC948		USGS		Geochemistry of rock samples from the National Geochemical Database: U.S. Geological Survey, Reston, VA.	U.S. Geological Survey	USGS		68.5833	-148.9	0.01	65	65	65	AAS	SEDIMENTARY	UNKNOWN	UNKNOWN	BLACK-SHALE																						120
CCC948		USGS		Geochemistry of rock samples from the National Geochemical Database: U.S. Geological Survey, Reston, VA.	U.S. Geological Survey	USGS		68.5833	-148.9	0.01	65	65	65	ES	SEDIMENTARY	UNKNOWN	UNKNOWN	BLACK-SHALE																15	700	100	15	100						0.3	5	20
CCC952		USGS		Geochemistry of rock samples from the National Geochemical Database: U.S. Geological Survey, Reston, VA.	U.S. Geological Survey	USGS		68.5889	-148.592	0.01	65	65	65	AAS	SEDIMENTARY	UNKNOWN	UNKNOWN	BLACK-SHALE																						45
CCC952		USGS		Geochemistry of rock samples from the National Geochemical Database: U.S. Geological Survey, Reston, VA.	U.S. Geological Survey	USGS		68.5889	-148.592	0.01	65	65	65	ES	SEDIMENTARY	UNKNOWN	UNKNOWN	BLACK-SHALE																3	2000	20		20						20	1.5
CCC953		USGS		Geochemistry of rock samples from the National Geochemical Database: U.S. Geological Survey, Reston, VA.	U.S. Geological Survey	USGS		68.475	-149.283	0.01	65	65	65	AAS	SEDIMENTARY	UNKNOWN	UNKNOWN	BLACK-SHALE																						200
CCC953		USGS		Geochemistry of rock samples from the National Geochemical Database: U.S. Geological Survey, Reston, VA.	U.S. Geological Survey	USGS		68.475	-149.283	0.01	65	65	65	ES	SEDIMENTARY	UNKNOWN	UNKNOWN	BLACK-SHALE																7	150	100	15	100		200		2		0.7	2	50
CCC954		USGS		Geochemistry of rock samples from the National Geochemical Database: U.S. Geological Survey, Reston, VA.	U.S. Geological Survey	USGS		68.6	-148.917	0.01	65	65	65	AAS	SEDIMENTARY	UNKNOWN	UNKNOWN	BLACK-SHALE																						130
CCC954		USGS		Geochemistry of rock samples from the National Geochemical Database: U.S. Geological Survey, Reston, VA.	U.S. Geological Survey	USGS		68.6	-148.917	0.01	65	65	65	ES	SEDIMENTARY	UNKNOWN	UNKNOWN	BLACK-SHALE																15	700	100	15	150						0.5	5	20
CCR158		USGS		Geochemistry of rock samples from the National Geochemical Database: U.S. Geological Survey, Reston, VA.	U.S. Geological Survey	USGS		68.6458	-148.542	0.01	59	59	59	AAS	SEDIMENTARY	UNKNOWN	UNKNOWN	BLACK-SHALE																						110
CCR158		USGS		Geochemistry of rock samples from the National Geochemical Database: U.S. Geological Survey, Reston, VA.	U.S. Geological Survey	USGS		68.6458	-148.542	0.01	59	59	59	ES	SEDIMENTARY	UNKNOWN	UNKNOWN	BLACK-SHALE																7	3000	150	20	150						0.3	2	70
CCR161		USGS		Geochemistry of rock samples from the National Geochemical Database: U.S. Geological Survey, Reston, VA.	U.S. Geological Survey	USGS		68.7917	-148.333	0.01	59	59	59	AAS	SEDIMENTARY	UNKNOWN	UNKNOWN	BLACK-SHALE																						75
CCR161		USGS		Geochemistry of rock samples from the National Geochemical Database: U.S. Geological Survey, Reston, VA.	U.S. Geological Survey	USGS		68.7917	-148.333	0.01	59	59	59	ES	SEDIMENTARY	UNKNOWN	UNKNOWN	BLACK-SHALE																3	700	50		20						0.15	1.5	70
CCR172		USGS		Geochemistry of rock samples from the National Geochemical Database: U.S. Geological Survey, Reston, VA.	U.S. Geological Survey	USGS		68.8583	-148.375	0.01	65	65	65	AAS	SEDIMENTARY	UNKNOWN	UNKNOWN	BLACK-SHALE																						110
CCR172		USGS		Geochemistry of rock samples from the National Geochemical Database: U.S. Geological Survey, Reston, VA.	U.S. Geological Survey	USGS		68.8583	-148.375	0.01	65	65	65	ES	SEDIMENTARY	UNKNOWN	UNKNOWN	BLACK-SHALE																5	700	70	15	100						1	1.5	70
CCR183		USGS		Geochemistry of rock samples from the National Geochemical Database: U.S. Geological Survey, Reston, VA.	U.S. Geological Survey	USGS		68.4	-149.867	0.01	59	59	59	AAS	SEDIMENTARY	UNKNOWN	UNKNOWN	BLACK-SHALE																						160
CCR183		USGS		Geochemistry of rock samples from the National Geochemical Database: U.S. Geological Survey, Reston, VA.	U.S. Geological Survey	USGS		68.4	-149.867	0.01	59	59	59	ES	SEDIMENTARY	UNKNOWN	UNKNOWN	BLACK-SHALE																3	150	70	10	70		200				0.15	1	70
CCR185		USGS		Geochemistry of rock samples from the National Geochemical Database: U.S. Geological Survey, Reston, VA.	U.S. Geological Survey	USGS		68.5042	-149.092	0.01	59	59	59	AAS	SEDIMENTARY	UNKNOWN	UNKNOWN	BLACK-SHALE																						110
CCR185		USGS		Geochemistry of rock samples from the National Geochemical Database: U.S. Geological Survey, Reston, VA.	U.S. Geological Survey	USGS		68.5042	-149.092	0.01	59	59	59	ES	SEDIMENTARY	UNKNOWN	UNKNOWN	BLACK-SHALE																2	1000	50	20	100						0.3	1.5	70
CCR186		USGS		Geochemistry of rock samples from the National Geochemical Database: U.S. Geological Survey, Reston, VA.	U.S. Geological Survey	USGS		68.7958	-148.35	0.01	56	56	56	AAS	SEDIMENTARY	UNKNOWN	UNKNOWN	BLACK-SHALE																						120
CCR186		USGS		Geochemistry of rock samples from the National Geochemical Database: U.S. Geological Survey, Reston, VA.	U.S. Geological Survey	USGS		68.7958	-148.35	0.01	56	56	56	ES	SEDIMENTARY	UNKNOWN	UNKNOWN	BLACK-SHALE																1.5	20	70		100				1.5			1	50
CCR191		USGS		Geochemistry of rock samples from the National Geochemical Database: U.S. Geological Survey, Reston, VA.	U.S. Geological Survey	USGS		68.9292	-148.217	0.01	65	65	65	AAS	SEDIMENTARY	UNKNOWN	UNKNOWN	BLACK-SHALE																						120
CCR191		USGS		Geochemistry of rock samples from the National Geochemical Database: U.S. Geological Survey, Reston, VA.	U.S. Geological Survey	USGS		68.9292	-148.217	0.01	65	65	65	ES	SEDIMENTARY	UNKNOWN	UNKNOWN	BLACK-SHALE																5	700	70	20	100						0.3	1.5	70
CCR192		USGS		Geochemistry of rock samples from the National Geochemical Database: U.S. Geological Survey, Reston, VA.	U.S. Geological Survey	USGS		68.475	-149.233	0.01	59	59	59	AAS	SEDIMENTARY	UNKNOWN	UNKNOWN	BLACK-SHALE																						600
CCR192		USGS		Geochemistry of rock samples from the National Geochemical Database: U.S. Geological Survey, Reston, VA.	U.S. Geological Survey	USGS		68.475	-149.233	0.01	59	59	59	ES	SEDIMENTARY	UNKNOWN	UNKNOWN	BLACK-SHALE																3	700	200	15	200		500		2		7	2	70
CCR193		USGS		Geochemistry of rock samples from the National Geochemical Database: U.S. Geological Survey, Reston, VA.	U.S. Geological Survey	USGS		68.475	-149.283	0.01	65	65	65	AAS	SEDIMENTARY	UNKNOWN	UNKNOWN	BLACK-SHALE																						180
CCR193		USGS		Geochemistry of rock samples from the National Geochemical Database: U.S. Geological Survey, Reston, VA.	U.S. Geological Survey	USGS		68.475	-149.283	0.01	65	65	65	ES	SEDIMENTARY	UNKNOWN	UNKNOWN	BLACK-SHALE																3	150	70	15	100		200		2		0.5	1	70
CCR194		USGS		Geochemistry of rock samples from the National Geochemical Database: U.S. Geological Survey, Reston, VA.	U.S. Geological Survey	USGS		68.475	-149.283	0.01	65	65	65	AAS	SEDIMENTARY	UNKNOWN	UNKNOWN	BLACK-SHALE																						190
CCR194		USGS		Geochemistry of rock samples from the National Geochemical Database: U.S. Geological Survey, Reston, VA.	U.S. Geological Survey	USGS		68.475	-149.283	0.01	65	65	65	ES	SEDIMENTARY	UNKNOWN	UNKNOWN	BLACK-SHALE																5	150	70	20	100		300		2		0.2	1.5	50
CCR195		USGS		Geochemistry of rock samples from the National Geochemical Database: U.S. Geological Survey, Reston, VA.	U.S. Geological Survey	USGS		68.4625	-149.317	0.01	65	65	65	AAS	SEDIMENTARY	UNKNOWN	UNKNOWN	BLACK-SHALE																						150
CCR195		USGS		Geochemistry of rock samples from the National Geochemical Database: U.S. Geological Survey, Reston, VA.	U.S. Geological Survey	USGS		68.4625	-149.317	0.01	65	65	65	ES	SEDIMENTARY	UNKNOWN	UNKNOWN	BLACK-SHALE																10	700	70	10	150		200				0.3	2	50
CCR196		USGS		Geochemistry of rock samples from the National Geochemical Database: U.S. Geological Survey, Reston, VA.	U.S. Geological Survey	USGS		68.4833	-149.211	0.01	56	56	56	AAS	SEDIMENTARY	UNKNOWN	UNKNOWN	BLACK-SHALE																						190
CCR196		USGS		Geochemistry of rock samples from the National Geochemical Database: U.S. Geological Survey, Reston, VA.	U.S. Geological Survey	USGS		68.4833	-149.211	0.01	56	56	56	ES	SEDIMENTARY	UNKNOWN	UNKNOWN	BLACK-SHALE																3	5000	150	30	300						2	1	50
CCR197		USGS		Geochemistry of rock samples from the National Geochemical Database: U.S. Geological Survey, Reston, VA.	U.S. Geological Survey	USGS		68.4583	-149.667	0.01	65	65	65	AAS	SEDIMENTARY	UNKNOWN	UNKNOWN	BLACK-SHALE																						140
CCR197		USGS		Geochemistry of rock samples from the National Geochemical Database: U.S. Geological Survey, Reston, VA.	U.S. Geological Survey	USGS		68.4583	-149.667	0.01	65	65	65	ES	SEDIMENTARY	UNKNOWN	UNKNOWN	BLACK-SHALE																5	2000	100	30	100						0.5	2	50
CCR198		USGS		Geochemistry of rock samples from the National Geochemical Database: U.S. Geological Survey, Reston, VA.	U.S. Geological Survey	USGS		68.6	-148.917	0.01	65	65	65	AAS	SEDIMENTARY	UNKNOWN	UNKNOWN	BLACK-SHALE																						120
CCR198		USGS		Geochemistry of rock samples from the National Geochemical Database: U.S. Geological Survey, Reston, VA.	U.S. Geological Survey	USGS		68.6	-148.917	0.01	65	65	65	ES	SEDIMENTARY	UNKNOWN	UNKNOWN	BLACK-SHALE																5	1000	100	20	100						0.2	2	50
CCR199		USGS		Geochemistry of rock samples from the National Geochemical Database: U.S. Geological Survey, Reston, VA.	U.S. Geological Survey	USGS		68.6305	-148.917	0.01	65	65	65	AAS	SEDIMENTARY	UNKNOWN	UNKNOWN	BLACK-SHALE																						160
CCR199		USGS		Geochemistry of rock samples from the National Geochemical Database: U.S. Geological Survey, Reston, VA.	U.S. Geological Survey	USGS		68.6305	-148.917	0.01	65	65	65	ES	SEDIMENTARY	UNKNOWN	UNKNOWN	BLACK-SHALE																5	700	100	20	100						0.2	2	50
CEC781		USGS		Geochemistry of rock samples from the National Geochemical Database: U.S. Geological Survey, Reston, VA.	U.S. Geological Survey	USGS		65.7922	-146.98	0.01				ES	SEDIMENTARY	UNKNOWN	UNKNOWN	BLACK-SHALE																1.5	50	30	10	50				2		0.5	0.07	50
CFG903		USGS		Geochemistry of rock samples from the National Geochemical Database: U.S. Geological Survey, Reston, VA.	U.S. Geological Survey	USGS		59.9633	-144.29	0.01				AAS	SEDIMENTARY	UNKNOWN	UNKNOWN	BLACK-SHALE																					0.5	160		0.1
CFG903		USGS		Geochemistry of rock samples from the National Geochemical Database: U.S. Geological Survey, Reston, VA.	U.S. Geological Survey	USGS		59.9633	-144.29	0.01				ES	SEDIMENTARY	UNKNOWN	UNKNOWN	BLACK-SHALE																7	1000	100	50	100		200				0.7	3
CFZ401		USGS		Geochemistry of rock samples from the National Geochemical Database: U.S. Geological Survey, Reston, VA.	U.S. Geological Survey	USGS		60.8167	-145.317	0.01				AAS	SEDIMENTARY	UNKNOWN	UNKNOWN	BLACK-SHALE																					0.1	30
CFZ401		USGS		Geochemistry of rock samples from the National Geochemical Database: U.S. Geological Survey, Reston, VA.	U.S. Geological Survey	USGS		60.8167	-145.317	0.01				ES	SEDIMENTARY	UNKNOWN	UNKNOWN	BLACK-SHALE																1.5	300	5	5	10						0.15	0.7
CGE726		USGS		Geochemistry of rock samples from the National Geochemical Database: U.S. Geological Survey, Reston, VA.	U.S. Geological Survey	USGS		55.5275	-160.926	0.01				AAS	SEDIMENTARY	UNKNOWN	UNKNOWN	BLACK-SHALE																						25
CGE726		USGS		Geochemistry of rock samples from the National Geochemical Database: U.S. Geological Survey, Reston, VA.	U.S. Geological Survey	USGS		55.5275	-160.926	0.01				ES	SEDIMENTARY	UNKNOWN	UNKNOWN	BLACK-SHALE																1	700	5									0.1
CGF362		USGS		Geochemistry of rock samples from the National Geochemical Database: U.S. Geological Survey, Reston, VA.	U.S. Geological Survey	USGS		55.5911	-161.272	0.01				AAS	SEDIMENTARY	UNKNOWN	UNKNOWN	BLACK-SHALE																						1000	20
CGF362		USGS		Geochemistry of rock samples from the National Geochemical Database: U.S. Geological Survey, Reston, VA.	U.S. Geological Survey	USGS		55.5911	-161.272	0.01				ES	SEDIMENTARY	UNKNOWN	UNKNOWN	BLACK-SHALE																7	1000	100	30	50		1000		2		1	3	20
CGF364		USGS		Geochemistry of rock samples from the National Geochemical Database: U.S. Geological Survey, Reston, VA.	U.S. Geological Survey	USGS		55.5764	-161.845	0.01				AAS	SEDIMENTARY	UNKNOWN	UNKNOWN	BLACK-SHALE																						55	20
CGF364		USGS		Geochemistry of rock samples from the National Geochemical Database: U.S. Geological Survey, Reston, VA.	U.S. Geological Survey	USGS		55.5764	-161.845	0.01				ES	SEDIMENTARY	UNKNOWN	UNKNOWN	BLACK-SHALE																5	3000	10	5	20						10	3
CGF423		USGS		Geochemistry of rock samples from the National Geochemical Database: U.S. Geological Survey, Reston, VA.	U.S. Geological Survey	USGS		55.5811	-160.898	0.01				AAS	SEDIMENTARY	UNKNOWN	UNKNOWN	BLACK-SHALE																						70	20
CGF423		USGS		Geochemistry of rock samples from the National Geochemical Database: U.S. Geological Survey, Reston, VA.	U.S. Geological Survey	USGS		55.5811	-160.898	0.01				ES	SEDIMENTARY	UNKNOWN	UNKNOWN	BLACK-SHALE																7	3000	70	30	50						10	2
CHG197		USGS		Geochemistry of rock samples from the National Geochemical Database: U.S. Geological Survey, Reston, VA.	U.S. Geological Survey	USGS		55.6811	-160.906	0.01				AAS	SEDIMENTARY	UNKNOWN	UNKNOWN	BLACK-SHALE																						150	20
CHG197		USGS		Geochemistry of rock samples from the National Geochemical Database: U.S. Geological Survey, Reston, VA.	U.S. Geological Survey	USGS		55.6811	-160.906	0.01				ES	SEDIMENTARY	UNKNOWN	UNKNOWN	BLACK-SHALE																5	1000	30	20	20						3	1
CHG202		USGS		Geochemistry of rock samples from the National Geochemical Database: U.S. Geological Survey, Reston, VA.	U.S. Geological Survey	USGS		55.63	-160.951	0.01				AAS	SEDIMENTARY	UNKNOWN	UNKNOWN	BLACK-SHALE																						110
CHG202		USGS		Geochemistry of rock samples from the National Geochemical Database: U.S. Geological Survey, Reston, VA.	U.S. Geological Survey	USGS		55.63	-160.951	0.01				ES	SEDIMENTARY	UNKNOWN	UNKNOWN	BLACK-SHALE																3	700	20	10	10						0.5	1.5
CHG206		USGS		Geochemistry of rock samples from the National Geochemical Database: U.S. Geological Survey, Reston, VA.	U.S. Geological Survey	USGS		55.6356	-160.948	0.01				AAS	SEDIMENTARY	UNKNOWN	UNKNOWN	BLACK-SHALE																						105
CHG206		USGS		Geochemistry of rock samples from the National Geochemical Database: U.S. Geological Survey, Reston, VA.	U.S. Geological Survey	USGS		55.6356	-160.948	0.01				ES	SEDIMENTARY	UNKNOWN	UNKNOWN	BLACK-SHALE																5	1500	50	20	30						0.7	1
CHG219		USGS		Geochemistry of rock samples from the National Geochemical Database: U.S. Geological Survey, Reston, VA.	U.S. Geological Survey	USGS		55.1272	-160.088	0.01				AAS	SEDIMENTARY	UNKNOWN	UNKNOWN	BLACK-SHALE																						110	10
CHG219		USGS		Geochemistry of rock samples from the National Geochemical Database: U.S. Geological Survey, Reston, VA.	U.S. Geological Survey	USGS		55.1272	-160.088	0.01				ES	SEDIMENTARY	UNKNOWN	UNKNOWN	BLACK-SHALE																7	500	20	20	50						1	2
CHG250		USGS		Geochemistry of rock samples from the National Geochemical Database: U.S. Geological Survey, Reston, VA.	U.S. Geological Survey	USGS		55.1717	-160.017	0.01				AAS	SEDIMENTARY	UNKNOWN	UNKNOWN	BLACK-SHALE																						40
CHG250		USGS		Geochemistry of rock samples from the National Geochemical Database: U.S. Geological Survey, Reston, VA.	U.S. Geological Survey	USGS		55.1717	-160.017	0.01				ES	SEDIMENTARY	UNKNOWN	UNKNOWN	BLACK-SHALE																5	500	50	20							0.05	1.5
D160191		USGS		Geochemistry of rock samples from the National Geochemical Database: U.S. Geological Survey, Reston, VA.	U.S. Geological Survey	USGS		44	-110.5	0.01	71	71	71	UNKNOWN	SEDIMENTARY	UNKNOWN	UNKNOWN	BLACK-SHALE												1.6
D160192		USGS		Geochemistry of rock samples from the National Geochemical Database: U.S. Geological Survey, Reston, VA.	U.S. Geological Survey	USGS		44	-110.5	0.01	71	71	71	UNKNOWN	SEDIMENTARY	UNKNOWN	UNKNOWN	BLACK-SHALE												0.42
D160193		USGS		Geochemistry of rock samples from the National Geochemical Database: U.S. Geological Survey, Reston, VA.	U.S. Geological Survey	USGS		44	-110.5	0.01	71	71	71	UNKNOWN	SEDIMENTARY	UNKNOWN	UNKNOWN	BLACK-SHALE												4.9
D160194		USGS		Geochemistry of rock samples from the National Geochemical Database: U.S. Geological Survey, Reston, VA.	U.S. Geological Survey	USGS		44	-110.5	0.01	71	71	71	UNKNOWN	SEDIMENTARY	UNKNOWN	UNKNOWN	BLACK-SHALE												0.24
D160195		USGS		Geochemistry of rock samples from the National Geochemical Database: U.S. Geological Survey, Reston, VA.	U.S. Geological Survey	USGS		44	-110.5	0.01	71	71	71	UNKNOWN	SEDIMENTARY	UNKNOWN	UNKNOWN	BLACK-SHALE												0.65
D164232		USGS		Geochemistry of rock samples from the National Geochemical Database: U.S. Geological Survey, Reston, VA.	U.S. Geological Survey	USGS		44.0378	-110.472	0.01	65	65	65	UNKNOWN	SEDIMENTARY	UNKNOWN	UNKNOWN	BLACK-SHALE												0.54				2	200	30	10	50					7	1.5	0.7
D164233		USGS		Geochemistry of rock samples from the National Geochemical Database: U.S. Geological Survey, Reston, VA.	U.S. Geological Survey	USGS		44.0375	-110.472	0.01	65	65	65	UNKNOWN	SEDIMENTARY	UNKNOWN	UNKNOWN	BLACK-SHALE												0.65				2	300	30	10	30					7	5	0.7
D164241		USGS		Geochemistry of rock samples from the National Geochemical Database: U.S. Geological Survey, Reston, VA.	U.S. Geological Survey	USGS		43.8889	-110.101	0.01	70	69	68	UNKNOWN	SEDIMENTARY	UNKNOWN	UNKNOWN	BLACK-SHALE												0.79				0.5	150	150	30	200					2		0.3
D164242		USGS		Geochemistry of rock samples from the National Geochemical Database: U.S. Geological Survey, Reston, VA.	U.S. Geological Survey	USGS		43.8889	-110.101	0.01	70	69	68	UNKNOWN	SEDIMENTARY	UNKNOWN	UNKNOWN	BLACK-SHALE												1.9				1.5	150	300	50	300					5		0.5
D164243		USGS		Geochemistry of rock samples from the National Geochemical Database: U.S. Geological Survey, Reston, VA.	U.S. Geological Survey	USGS		43.8889	-110.101	0.01	70	69	68	UNKNOWN	SEDIMENTARY	UNKNOWN	UNKNOWN	BLACK-SHALE												1.5				0.7	150	150	15	2000				1.5	5		0.5
D164245		USGS		Geochemistry of rock samples from the National Geochemical Database: U.S. Geological Survey, Reston, VA.	U.S. Geological Survey	USGS		43.8889	-110.101	0.01	70	69	68	UNKNOWN	SEDIMENTARY	UNKNOWN	UNKNOWN	BLACK-SHALE												1.6				0.7	100	150	15	1500				1.5	5		0.5
D164246		USGS		Geochemistry of rock samples from the National Geochemical Database: U.S. Geological Survey, Reston, VA.	U.S. Geological Survey	USGS		43.8889	-110.101	0.01	70	69	68	UNKNOWN	SEDIMENTARY	UNKNOWN	UNKNOWN	BLACK-SHALE												0.49				0.5	150	100	15	300				1.5	1		0.3
D164247		USGS		Geochemistry of rock samples from the National Geochemical Database: U.S. Geological Survey, Reston, VA.	U.S. Geological Survey	USGS		43.8889	-110.101	0.01	70	69	68	UNKNOWN	SEDIMENTARY	UNKNOWN	UNKNOWN	BLACK-SHALE												1.4				0.7	100	200	15	700				0.15	5		0.5
D164248		USGS		Geochemistry of rock samples from the National Geochemical Database: U.S. Geological Survey, Reston, VA.	U.S. Geological Survey	USGS		43.8889	-110.101	0.01	70	69	68	UNKNOWN	SEDIMENTARY	UNKNOWN	UNKNOWN	BLACK-SHALE												0.52				0.5	200	70		100					2		0.2
D164249		USGS		Geochemistry of rock samples from the National Geochemical Database: U.S. Geological Survey, Reston, VA.	U.S. Geological Survey	USGS		43.8889	-110.101	0.01	70	69	68	UNKNOWN	SEDIMENTARY	UNKNOWN	UNKNOWN	BLACK-SHALE												0.72				0.5	150	100		70					3		0.2
D164253		USGS		Geochemistry of rock samples from the National Geochemical Database: U.S. Geological Survey, Reston, VA.	U.S. Geological Survey	USGS		43.9339	-110.233	0.01	71	71	71	UNKNOWN	SEDIMENTARY	UNKNOWN	UNKNOWN	BLACK-SHALE												0.5				0.03	70								0.5	1	0.03
D164254		USGS		Geochemistry of rock samples from the National Geochemical Database: U.S. Geological Survey, Reston, VA.	U.S. Geological Survey	USGS		43.9339	-110.232	0.01	71	71	71	UNKNOWN	SEDIMENTARY	UNKNOWN	UNKNOWN	BLACK-SHALE												0.7				0.03	70								0.5	1.5	0.02
D165377		USGS		Geochemistry of rock samples from the National Geochemical Database: U.S. Geological Survey, Reston, VA.	U.S. Geological Survey	USGS		43.9614	-110.408	0.01	65	65	65	UNKNOWN	SEDIMENTARY	UNKNOWN	UNKNOWN	BLACK-SHALE		63.8	0.64	14.8	1.9	1.5	0.04	2.4	1.1	0.9	3.7	0.31				2	150	30	15	50					10	0.7	1	70		70
D165386		USGS		Geochemistry of rock samples from the National Geochemical Database: U.S. Geological Survey, Reston, VA.	U.S. Geological Survey	USGS		43.75	-109.75	0.01	71	71	71	UNKNOWN	SEDIMENTARY	UNKNOWN	UNKNOWN	BLACK-SHALE												9.8				0.5	70	20	7	10		700		1.5	0.7		0.7	150		100
D165387		USGS		Geochemistry of rock samples from the National Geochemical Database: U.S. Geological Survey, Reston, VA.	U.S. Geological Survey	USGS		43.75	-109.75	0.01	71	71	71	UNKNOWN	SEDIMENTARY	UNKNOWN	UNKNOWN	BLACK-SHALE												8.5				1	70	20	10	7		700		2	1.5	10	2	70
D165388		USGS		Geochemistry of rock samples from the National Geochemical Database: U.S. Geological Survey, Reston, VA.	U.S. Geological Survey	USGS		43.75	-109.75	0.01	71	71	71	UNKNOWN	SEDIMENTARY	UNKNOWN	UNKNOWN	BLACK-SHALE												9.3				0.3	70	15		15		300		2	0.7	7	0.7	150		70
D165389		USGS		Geochemistry of rock samples from the National Geochemical Database: U.S. Geological Survey, Reston, VA.	U.S. Geological Survey	USGS		43.75	-109.75	0.01	71	71	71	UNKNOWN	SEDIMENTARY	UNKNOWN	UNKNOWN	BLACK-SHALE												0.25			1	0.2	100			2					1		0.3
D165390		USGS		Geochemistry of rock samples from the National Geochemical Database: U.S. Geological Survey, Reston, VA.	U.S. Geological Survey	USGS		43.9833	-109.75	0.01	18	18	18	UNKNOWN	SEDIMENTARY	UNKNOWN	UNKNOWN	BLACK-SHALE												0.46				2	70	7		50					7	1	0.3
D165391		USGS		Geochemistry of rock samples from the National Geochemical Database: U.S. Geological Survey, Reston, VA.	U.S. Geological Survey	USGS		43.7186	-109.889	0.01	18	18	18	UNKNOWN	SEDIMENTARY	UNKNOWN	UNKNOWN	BLACK-SHALE												0.95				7	150	7	7	20					3	1.5	0.7
D165392		USGS		Geochemistry of rock samples from the National Geochemical Database: U.S. Geological Survey, Reston, VA.	U.S. Geological Survey	USGS		43.75	-109.75	0.01	18	18	18	UNKNOWN	SEDIMENTARY	UNKNOWN	UNKNOWN	BLACK-SHALE												0.6				2	300	15	10	30					7	2	1.5	70		70
D172744		USGS		Geochemistry of rock samples from the National Geochemical Database: U.S. Geological Survey, Reston, VA.	U.S. Geological Survey	USGS		48.1639	-112.872	0.01	56	56	56	UNKNOWN	SEDIMENTARY	UNKNOWN	UNKNOWN	BLACK-SHALE																2	150	15	7	20					7	1.5	1.5	50
D172745		USGS		Geochemistry of rock samples from the National Geochemical Database: U.S. Geological Survey, Reston, VA.	U.S. Geological Survey	USGS		48.1639	-112.872	0.01	56	56	56	UNKNOWN	SEDIMENTARY	UNKNOWN	UNKNOWN	BLACK-SHALE																2	150	15	7	30					7	1.5	1.5	30
D172746		USGS		Geochemistry of rock samples from the National Geochemical Database: U.S. Geological Survey, Reston, VA.	U.S. Geological Survey	USGS		48.1639	-112.872	0.01	56	56	56	UNKNOWN	SEDIMENTARY	UNKNOWN	UNKNOWN	BLACK-SHALE																2	150	30	7	30					7	1.5	1.5	30
D172747		USGS		Geochemistry of rock samples from the National Geochemical Database: U.S. Geological Survey, Reston, VA.	U.S. Geological Survey	USGS		48.1639	-112.872	0.01	56	56	56	UNKNOWN	SEDIMENTARY	UNKNOWN	UNKNOWN	BLACK-SHALE																2	150	20	7	20					7	1.5	1.5	30
D172748		USGS		Geochemistry of rock samples from the National Geochemical Database: U.S. Geological Survey, Reston, VA.	U.S. Geological Survey	USGS		48.1639	-112.872	0.01	56	56	56	UNKNOWN	SEDIMENTARY	UNKNOWN	UNKNOWN	BLACK-SHALE																2	200	20	5	30					7	1.5	1.5	30
D172749		USGS		Geochemistry of rock samples from the National Geochemical Database: U.S. Geological Survey, Reston, VA.	U.S. Geological Survey	USGS		48.1639	-112.872	0.01	56	56	56	UNKNOWN	SEDIMENTARY	UNKNOWN	UNKNOWN	BLACK-SHALE																1.5	200	20	7	20					5	1.5	1	30
D172750		USGS		Geochemistry of rock samples from the National Geochemical Database: U.S. Geological Survey, Reston, VA.	U.S. Geological Survey	USGS		48.1639	-112.872	0.01	56	56	56	UNKNOWN	SEDIMENTARY	UNKNOWN	UNKNOWN	BLACK-SHALE																3	300	20	7	20					7	3	1.5	50
D172751		USGS		Geochemistry of rock samples from the National Geochemical Database: U.S. Geological Survey, Reston, VA.	U.S. Geological Survey	USGS		48.1639	-112.872	0.01	56	56	56	UNKNOWN	SEDIMENTARY	UNKNOWN	UNKNOWN	BLACK-SHALE																3	200	20	10	20					7	2	1.5	30
D172752		USGS		Geochemistry of rock samples from the National Geochemical Database: U.S. Geological Survey, Reston, VA.	U.S. Geological Survey	USGS		48.1639	-112.872	0.01	56	56	56	UNKNOWN	SEDIMENTARY	UNKNOWN	UNKNOWN	BLACK-SHALE																3	300	20	7	20					7	2	1.5	30
D172753		USGS		Geochemistry of rock samples from the National Geochemical Database: U.S. Geological Survey, Reston, VA.	U.S. Geological Survey	USGS		48.1639	-112.872	0.01	56	56	56	UNKNOWN	SEDIMENTARY	UNKNOWN	UNKNOWN	BLACK-SHALE															7	1	500	10	5	3					1		0.2	30
D172754		USGS		Geochemistry of rock samples from the National Geochemical Database: U.S. Geological Survey, Reston, VA.	U.S. Geological Survey	USGS		48.1639	-112.872	0.01	56	56	56	UNKNOWN	SEDIMENTARY	UNKNOWN	UNKNOWN	BLACK-SHALE																2	300	15	7	15					5	3	1	30
D172755		USGS		Geochemistry of rock samples from the National Geochemical Database: U.S. Geological Survey, Reston, VA.	U.S. Geological Survey	USGS		48.1639	-112.872	0.01	56	56	56	UNKNOWN	SEDIMENTARY	UNKNOWN	UNKNOWN	BLACK-SHALE																1.5	300	20	15	15					5	0.2	0.5	50		70
D172756		USGS		Geochemistry of rock samples from the National Geochemical Database: U.S. Geological Survey, Reston, VA.	U.S. Geological Survey	USGS		48.1639	-112.872	0.01	56	56	56	UNKNOWN	SEDIMENTARY	UNKNOWN	UNKNOWN	BLACK-SHALE																2	200	20	15	20					5	0.2	0.7	50		70
D172757		USGS		Geochemistry of rock samples from the National Geochemical Database: U.S. Geological Survey, Reston, VA.	U.S. Geological Survey	USGS		48.1639	-112.872	0.01	56	56	56	UNKNOWN	SEDIMENTARY	UNKNOWN	UNKNOWN	BLACK-SHALE																2	500	15	7	10					3	0.3	0.7	30
D172758		USGS		Geochemistry of rock samples from the National Geochemical Database: U.S. Geological Survey, Reston, VA.	U.S. Geological Survey	USGS		48.1639	-112.872	0.01	56	56	56	UNKNOWN	SEDIMENTARY	UNKNOWN	UNKNOWN	BLACK-SHALE																2	300	15	7	10					3	0.2	0.5	30
D172759		USGS		Geochemistry of rock samples from the National Geochemical Database: U.S. Geological Survey, Reston, VA.	U.S. Geological Survey	USGS		48.1639	-112.872	0.01	56	56	56	UNKNOWN	SEDIMENTARY	UNKNOWN	UNKNOWN	BLACK-SHALE																3	300	20	7	10					3	0.15	0.7	30
D172760		USGS		Geochemistry of rock samples from the National Geochemical Database: U.S. Geological Survey, Reston, VA.	U.S. Geological Survey	USGS		48.1639	-112.872	0.01	56	56	56	UNKNOWN	SEDIMENTARY	UNKNOWN	UNKNOWN	BLACK-SHALE																3	500	30	15	20					7	0.2	0.5	50		70
D172761		USGS		Geochemistry of rock samples from the National Geochemical Database: U.S. Geological Survey, Reston, VA.	U.S. Geological Survey	USGS		48.1639	-112.872	0.01	56	56	56	UNKNOWN	SEDIMENTARY	UNKNOWN	UNKNOWN	BLACK-SHALE																3	500	30	15	20					7	0.2	0.5	30
D172762		USGS		Geochemistry of rock samples from the National Geochemical Database: U.S. Geological Survey, Reston, VA.	U.S. Geological Survey	USGS		46.5	-113.25	0.01	56	56	56	UNKNOWN	SEDIMENTARY	UNKNOWN	UNKNOWN	BLACK-SHALE																3	150	30	15	50					7	0.2	1	30
D172763		USGS		Geochemistry of rock samples from the National Geochemical Database: U.S. Geological Survey, Reston, VA.	U.S. Geological Survey	USGS		46.5	-113.25	0.01	56	56	56	UNKNOWN	SEDIMENTARY	UNKNOWN	UNKNOWN	BLACK-SHALE																3	150	30	10	30					7	0.2	0.7	30
D196679		USGS		Geochemistry of rock samples from the National Geochemical Database: U.S. Geological Survey, Reston, VA.	U.S. Geological Survey	USGS		37.125	-110.875	0.01	70	70	70	UNKNOWN	SEDIMENTARY	UNKNOWN	UNKNOWN	BLACK-SHALE																2	70	150	10	100		700		7	7	1.5	1.5	70		70
D204626		USGS		Geochemistry of rock samples from the National Geochemical Database: U.S. Geological Survey, Reston, VA.	U.S. Geological Survey	USGS		38	-91.5	0.01	70	70	70	UNKNOWN	SEDIMENTARY	UNKNOWN	UNKNOWN	BLACK-SHALE
D242072		USGS		Geochemistry of rock samples from the National Geochemical Database: U.S. Geological Survey, Reston, VA.	U.S. Geological Survey	USGS		39.6667	-80	0.01	55	55	55	DNAA	SEDIMENTARY	UNKNOWN	UNKNOWN	BLACK-SHALE
D242070		USGS		Geochemistry of rock samples from the National Geochemical Database: U.S. Geological Survey, Reston, VA.	U.S. Geological Survey	USGS		37.7	-84.0333	0.01	55	55	55	DNAA	SEDIMENTARY	UNKNOWN	UNKNOWN	BLACK-SHALE
D242070		USGS		Geochemistry of rock samples from the National Geochemical Database: U.S. Geological Survey, Reston, VA.	U.S. Geological Survey	USGS		37.7	-84.0333	0.01	55	55	55	ICPAES	SEDIMENTARY	UNKNOWN	UNKNOWN	BLACK-SHALE																4.8	390	260	46	150	7	3100	60		6.6	5	3	34	67	50	10
D242072		USGS		Geochemistry of rock samples from the National Geochemical Database: U.S. Geological Survey, Reston, VA.	U.S. Geological Survey	USGS		39.6667	-80	0.01	55	55	55	ICPAES	SEDIMENTARY	UNKNOWN	UNKNOWN	BLACK-SHALE																6.1	130	560	40	320	52	4300	70	6	5.2	4.3	0.78	33	47	48	10
D255312		USGS		Geochemistry of rock samples from the National Geochemical Database: U.S. Geological Survey, Reston, VA.	U.S. Geological Survey	USGS		38	-109.625	0.01	68	68	68	XRF	SEDIMENTARY	UNKNOWN	UNKNOWN	BLACK-SHALE		49.8	0.86	28.3				2.6	0.02	0.47	8.99	0.06
D258062		USGS		Geochemistry of rock samples from the National Geochemical Database: U.S. Geological Survey, Reston, VA.	U.S. Geological Survey	USGS		40	-87	0.01	70	70	70	DNAA	SEDIMENTARY	UNKNOWN	UNKNOWN	BLACK-SHALE
D280890		USGS		Geochemistry of rock samples from the National Geochemical Database: U.S. Geological Survey, Reston, VA.	U.S. Geological Survey	USGS		41	-103	0.01	70	70	70	ICPAES	SEDIMENTARY	UNKNOWN	UNKNOWN	BLACK-SHALE																2.7	210	290	11	110	200	3700	50		5	12	3.1	45	61	37
D280891		USGS		Geochemistry of rock samples from the National Geochemical Database: U.S. Geological Survey, Reston, VA.	U.S. Geological Survey	USGS		41	-103	0.01	70	70	70	ICPAES	SEDIMENTARY	UNKNOWN	UNKNOWN	BLACK-SHALE																3.5	200	270	11	71	35	550	60		4.7	9.2	5.4	28	47	23
D280892		USGS		Geochemistry of rock samples from the National Geochemical Database: U.S. Geological Survey, Reston, VA.	U.S. Geological Survey	USGS		41	-103	0.01	70	70	70	ICPAES	SEDIMENTARY	UNKNOWN	UNKNOWN	BLACK-SHALE																2.4	210	180	10	47	29	520	40		4.2	11	6.9	24	39	20
D280893		USGS		Geochemistry of rock samples from the National Geochemical Database: U.S. Geological Survey, Reston, VA.	U.S. Geological Survey	USGS		41	-103	0.01	70	70	70	ICPAES	SEDIMENTARY	UNKNOWN	UNKNOWN	BLACK-SHALE																3.2	190	530	11	96	91	1700	30		5.7	4.8	2.9	38	63	35
D280894		USGS		Geochemistry of rock samples from the National Geochemical Database: U.S. Geological Survey, Reston, VA.	U.S. Geological Survey	USGS		40	-103	0.01	70	70	70	ICPAES	SEDIMENTARY	UNKNOWN	UNKNOWN	BLACK-SHALE																3.1	240	180	11	94		270			4.5	5.8	3.9	34	50	28
D280895		USGS		Geochemistry of rock samples from the National Geochemical Database: U.S. Geological Survey, Reston, VA.	U.S. Geological Survey	USGS		40	-103	0.01	70	70	70	ICPAES	SEDIMENTARY	UNKNOWN	UNKNOWN	BLACK-SHALE																2.7	190	170	13	190	150	4000	60		6.1	8.9	2.2	35	57	32
D291584		USGS		Geochemistry of rock samples from the National Geochemical Database: U.S. Geological Survey, Reston, VA.	U.S. Geological Survey	USGS		44.7333	-122.075	0.01	71	71	71	AAS	SEDIMENTARY	UNKNOWN	UNKNOWN	BLACK-SHALE																					0.3	15	12
D291584		USGS		Geochemistry of rock samples from the National Geochemical Database: U.S. Geological Survey, Reston, VA.	U.S. Geological Survey	USGS		44.7333	-122.075	0.01	71	71	71	ES	SEDIMENTARY	UNKNOWN	UNKNOWN	BLACK-SHALE																3	150			30				3			0.5
D291584		USGS		Geochemistry of rock samples from the National Geochemical Database: U.S. Geological Survey, Reston, VA.	U.S. Geological Survey	USGS		44.7333	-122.075	0.01	71	71	71	TITR	SEDIMENTARY	UNKNOWN	UNKNOWN	BLACK-SHALE						0.47
D291584		USGS		Geochemistry of rock samples from the National Geochemical Database: U.S. Geological Survey, Reston, VA.	U.S. Geological Survey	USGS		44.7333	-122.075	0.01	71	71	71	XRF	SEDIMENTARY	UNKNOWN	UNKNOWN	BLACK-SHALE		77.5	0.63	10.7				0.95	0.02	0.47	1.97	0.22
D291587		USGS		Geochemistry of rock samples from the National Geochemical Database: U.S. Geological Survey, Reston, VA.	U.S. Geological Survey	USGS		44.7333	-122.075	0.01	71	71	71	AAS	SEDIMENTARY	UNKNOWN	UNKNOWN	BLACK-SHALE																					84	25000	220
D291587		USGS		Geochemistry of rock samples from the National Geochemical Database: U.S. Geological Survey, Reston, VA.	U.S. Geological Survey	USGS		44.7333	-122.075	0.01	71	71	71	ES	SEDIMENTARY	UNKNOWN	UNKNOWN	BLACK-SHALE																1.5	700	10		7000	150		200	10		0.3	0.05
D291587		USGS		Geochemistry of rock samples from the National Geochemical Database: U.S. Geological Survey, Reston, VA.	U.S. Geological Survey	USGS		44.7333	-122.075	0.01	71	71	71	TITR	SEDIMENTARY	UNKNOWN	UNKNOWN	BLACK-SHALE						0.49
D291587		USGS		Geochemistry of rock samples from the National Geochemical Database: U.S. Geological Survey, Reston, VA.	U.S. Geological Survey	USGS		44.7333	-122.075	0.01	71	71	71	XRF	SEDIMENTARY	UNKNOWN	UNKNOWN	BLACK-SHALE
D316841		USGS		Geochemistry of rock samples from the National Geochemical Database: U.S. Geological Survey, Reston, VA.	U.S. Geological Survey	USGS		42.225	-73.8231	0.01				AAS	SEDIMENTARY	UNKNOWN	UNKNOWN	BLACK-SHALE
D316841		USGS		Geochemistry of rock samples from the National Geochemical Database: U.S. Geological Survey, Reston, VA.	U.S. Geological Survey	USGS		42.225	-73.8231	0.01				ES	SEDIMENTARY	UNKNOWN	UNKNOWN	BLACK-SHALE																5	1000	30	15	70						3	1.5
D316841		USGS		Geochemistry of rock samples from the National Geochemical Database: U.S. Geological Survey, Reston, VA.	U.S. Geological Survey	USGS		42.225	-73.8231	0.01				ICPAES	SEDIMENTARY	UNKNOWN	UNKNOWN	BLACK-SHALE																					1.1	180	13
D316841		USGS		Geochemistry of rock samples from the National Geochemical Database: U.S. Geological Survey, Reston, VA.	U.S. Geological Survey	USGS		42.225	-73.8231	0.01				XRF	SEDIMENTARY	UNKNOWN	UNKNOWN	BLACK-SHALE		59	0.4	9.1			0.14	3.59	5.24	0.54	2.23	0.1
D316843		USGS		Geochemistry of rock samples from the National Geochemical Database: U.S. Geological Survey, Reston, VA.	U.S. Geological Survey	USGS		42.2242	-73.8233	0.01				AAS	SEDIMENTARY	UNKNOWN	UNKNOWN	BLACK-SHALE
D316843		USGS		Geochemistry of rock samples from the National Geochemical Database: U.S. Geological Survey, Reston, VA.	U.S. Geological Survey	USGS		42.2242	-73.8233	0.01				ES	SEDIMENTARY	UNKNOWN	UNKNOWN	BLACK-SHALE																5	700	30	20	30						2	1.5	50
D316843		USGS		Geochemistry of rock samples from the National Geochemical Database: U.S. Geological Survey, Reston, VA.	U.S. Geological Survey	USGS		42.2242	-73.8233	0.01				ICPAES	SEDIMENTARY	UNKNOWN	UNKNOWN	BLACK-SHALE																					0.6	79	8
D316843		USGS		Geochemistry of rock samples from the National Geochemical Database: U.S. Geological Survey, Reston, VA.	U.S. Geological Survey	USGS		42.2242	-73.8233	0.01				XRF	SEDIMENTARY	UNKNOWN	UNKNOWN	BLACK-SHALE		54	0.83	16.5			0.09	2.58	5.48	1.24	3.61	0.15
D319566		USGS		Geochemistry of rock samples from the National Geochemical Database: U.S. Geological Survey, Reston, VA.	U.S. Geological Survey	USGS		39.0506	-110.584	0.01	6	36	66	DNAA	SEDIMENTARY	UNKNOWN	UNKNOWN	BLACK-SHALE
D319566		USGS		Geochemistry of rock samples from the National Geochemical Database: U.S. Geological Survey, Reston, VA.	U.S. Geological Survey	USGS		39.0506	-110.584	0.01	6	36	66	ES	SEDIMENTARY	UNKNOWN	UNKNOWN	BLACK-SHALE																3		10		15							0.3
D322339		USGS		Geochemistry of rock samples from the National Geochemical Database: U.S. Geological Survey, Reston, VA.	U.S. Geological Survey	USGS		39.05	-95.2667	0.01	70	70	70	ICPAES	SEDIMENTARY	UNKNOWN	UNKNOWN	BLACK-SHALE																4.6	260	150	18	65		37	40		7.9	1.7	1.4	24	32	13
D322339		USGS		Geochemistry of rock samples from the National Geochemical Database: U.S. Geological Survey, Reston, VA.	U.S. Geological Survey	USGS		39.05	-95.2667	0.01	70	70	70	MISC	SEDIMENTARY	UNKNOWN	UNKNOWN	BLACK-SHALE						2.53
D322340		USGS		Geochemistry of rock samples from the National Geochemical Database: U.S. Geological Survey, Reston, VA.	U.S. Geological Survey	USGS		39.05	-95.2667	0.01	70	70	70	ICPAES	SEDIMENTARY	UNKNOWN	UNKNOWN	BLACK-SHALE																4.4	250	180	16	88		41	40	2	7.5	2.4	1.4	27	44	26
D322340		USGS		Geochemistry of rock samples from the National Geochemical Database: U.S. Geological Survey, Reston, VA.	U.S. Geological Survey	USGS		39.05	-95.2667	0.01	70	70	70	MISC	SEDIMENTARY	UNKNOWN	UNKNOWN	BLACK-SHALE						2.6
D322341		USGS		Geochemistry of rock samples from the National Geochemical Database: U.S. Geological Survey, Reston, VA.	U.S. Geological Survey	USGS		39.05	-95.2667	0.01	70	70	70	ICPAES	SEDIMENTARY	UNKNOWN	UNKNOWN	BLACK-SHALE																4.1	250	220	16	98		70	30	3	7.1	2.3	1.5	21	29	15
D322341		USGS		Geochemistry of rock samples from the National Geochemical Database: U.S. Geological Survey, Reston, VA.	U.S. Geological Survey	USGS		39.05	-95.2667	0.01	70	70	70	MISC	SEDIMENTARY	UNKNOWN	UNKNOWN	BLACK-SHALE						2.76
D322342		USGS		Geochemistry of rock samples from the National Geochemical Database: U.S. Geological Survey, Reston, VA.	U.S. Geological Survey	USGS		39.05	-95.2667	0.01	70	70	70	ICPAES	SEDIMENTARY	UNKNOWN	UNKNOWN	BLACK-SHALE																4.7	260	140	18	68		41	50		8.1	1.9	1.4	24	35	18
D322342		USGS		Geochemistry of rock samples from the National Geochemical Database: U.S. Geological Survey, Reston, VA.	U.S. Geological Survey	USGS		39.05	-95.2667	0.01	70	70	70	MISC	SEDIMENTARY	UNKNOWN	UNKNOWN	BLACK-SHALE						2.6
D387339		USGS		Geochemistry of rock samples from the National Geochemical Database: U.S. Geological Survey, Reston, VA.	U.S. Geological Survey	USGS		37.8228	-108.173	0.01	6	36	66	DNAA	SEDIMENTARY	UNKNOWN	UNKNOWN	BLACK-SHALE
D387339		USGS		Geochemistry of rock samples from the National Geochemical Database: U.S. Geological Survey, Reston, VA.	U.S. Geological Survey	USGS		37.8228	-108.173	0.01	6	36	66	ES	SEDIMENTARY	UNKNOWN	UNKNOWN	BLACK-SHALE																3	150	30	10	20						2	1	50
D387339		USGS		Geochemistry of rock samples from the National Geochemical Database: U.S. Geological Survey, Reston, VA.	U.S. Geological Survey	USGS		37.8228	-108.173	0.01	6	36	66	ICPAES	SEDIMENTARY	UNKNOWN	UNKNOWN	BLACK-SHALE																2.7	140	26	9	18	0.97	70	5.5	0.15	7.1	3.8	1	33	62	28
D576124		USGS		Geochemistry of rock samples from the National Geochemical Database: U.S. Geological Survey, Reston, VA.	U.S. Geological Survey	USGS		46.2378	-111.719	0.01	65	65	65	ICPAES	SEDIMENTARY	UNKNOWN	UNKNOWN	BLACK-SHALE																5.4	1400	37	15	52	0.54	120	13	0.19	9.1	0.67	0.54	37	66	35
D576124		USGS		Geochemistry of rock samples from the National Geochemical Database: U.S. Geological Survey, Reston, VA.	U.S. Geological Survey	USGS		46.2378	-111.719	0.01	65	65	65	XRF	SEDIMENTARY	UNKNOWN	UNKNOWN	BLACK-SHALE																		48		55		124							70
JAS075		USGS		Geochemistry of rock samples from the National Geochemical Database: U.S. Geological Survey, Reston, VA.	U.S. Geological Survey	USGS		35.0167	-94.2167	0.01	70	70	70	ES	SEDIMENTARY	UNKNOWN	UNKNOWN	BLACK-SHALE																5	500	30	10	10						0.1	0.2	70
LBX052		USGS		Geochemistry of rock samples from the National Geochemical Database: U.S. Geological Survey, Reston, VA.	U.S. Geological Survey	USGS		39.0875	-106.815	0.01				AAS	SEDIMENTARY	UNKNOWN	UNKNOWN	BLACK-SHALE																				60		35
LBX052		USGS		Geochemistry of rock samples from the National Geochemical Database: U.S. Geological Survey, Reston, VA.	U.S. Geological Survey	USGS		39.0875	-106.815	0.01				ES	SEDIMENTARY	UNKNOWN	UNKNOWN	BLACK-SHALE																3	1000			30						20	3	20
LBX052		USGS		Geochemistry of rock samples from the National Geochemical Database: U.S. Geological Survey, Reston, VA.	U.S. Geological Survey	USGS		39.0875	-106.815	0.01				ISE	SEDIMENTARY	UNKNOWN	UNKNOWN	BLACK-SHALE
MBI449		USGS		Geochemistry of rock samples from the National Geochemical Database: U.S. Geological Survey, Reston, VA.	U.S. Geological Survey	USGS		67.9167	-150.544	0.01				AAS	SEDIMENTARY	UNKNOWN	UNKNOWN	BLACK-SHALE																				20		45
MBI449		USGS		Geochemistry of rock samples from the National Geochemical Database: U.S. Geological Survey, Reston, VA.	U.S. Geological Survey	USGS		67.9167	-150.544	0.01				ES	SEDIMENTARY	UNKNOWN	UNKNOWN	BLACK-SHALE																5	50	30	10	20				1			1
W210543		USGS		Geochemistry of rock samples from the National Geochemical Database: U.S. Geological Survey, Reston, VA.	U.S. Geological Survey	USGS		36.5333	-79.6667	0.01	59	59	59	AAS	SEDIMENTARY	UNKNOWN	UNKNOWN	BLACK-SHALE		47.5	0.76	16.8	0.62	6.4	0.1	4.3	5.4	4.7	3.5	0.34
W210543		USGS		Geochemistry of rock samples from the National Geochemical Database: U.S. Geological Survey, Reston, VA.	U.S. Geological Survey	USGS		36.5333	-79.6667	0.01	59	59	59	DNAA	SEDIMENTARY	UNKNOWN	UNKNOWN	BLACK-SHALE
W210543		USGS		Geochemistry of rock samples from the National Geochemical Database: U.S. Geological Survey, Reston, VA.	U.S. Geological Survey	USGS		36.5333	-79.6667	0.01	59	59	59	ES	SEDIMENTARY	UNKNOWN	UNKNOWN	BLACK-SHALE															11	3.4	470	19	14	55		81			4.6	2.9	1.9	11
W210544		USGS		Geochemistry of rock samples from the National Geochemical Database: U.S. Geological Survey, Reston, VA.	U.S. Geological Survey	USGS		36.3	-80.1167	0.01	59	59	59	AAS	SEDIMENTARY	UNKNOWN	UNKNOWN	BLACK-SHALE		55.8	0.88	18.9	1.9	5.2	0.04	2.5	1.1	2.3	2.6	0.15
W210544		USGS		Geochemistry of rock samples from the National Geochemical Database: U.S. Geological Survey, Reston, VA.	U.S. Geological Survey	USGS		36.3	-80.1167	0.01	59	59	59	DNAA	SEDIMENTARY	UNKNOWN	UNKNOWN	BLACK-SHALE
W210544		USGS		Geochemistry of rock samples from the National Geochemical Database: U.S. Geological Survey, Reston, VA.	U.S. Geological Survey	USGS		36.3	-80.1167	0.01	59	59	59	ES	SEDIMENTARY	UNKNOWN	UNKNOWN	BLACK-SHALE															15	4.6	440	17	14	40		79			5.9	0.75	1.1
W219193		USGS		Geochemistry of rock samples from the National Geochemical Database: U.S. Geological Survey, Reston, VA.	U.S. Geological Survey	USGS		36.8217	-79.3247	0.01				UNKNOWN	SEDIMENTARY	UNKNOWN	UNKNOWN	BLACK-SHALE																			15	46		190		0.1
W219194		USGS		Geochemistry of rock samples from the National Geochemical Database: U.S. Geological Survey, Reston, VA.	U.S. Geological Survey	USGS		36.8653	-79.2619	0.01				UNKNOWN	SEDIMENTARY	UNKNOWN	UNKNOWN	BLACK-SHALE																			9	18		72
W219195		USGS		Geochemistry of rock samples from the National Geochemical Database: U.S. Geological Survey, Reston, VA.	U.S. Geological Survey	USGS		36.5458	-79.6917	0.01				UNKNOWN	SEDIMENTARY	UNKNOWN	UNKNOWN	BLACK-SHALE																			23	47		120		0.11
W219196		USGS		Geochemistry of rock samples from the National Geochemical Database: U.S. Geological Survey, Reston, VA.	U.S. Geological Survey	USGS		36.5458	-79.6917	0.01				UNKNOWN	SEDIMENTARY	UNKNOWN	UNKNOWN	BLACK-SHALE																			20	72		120		0.11
W219197		USGS		Geochemistry of rock samples from the National Geochemical Database: U.S. Geological Survey, Reston, VA.	U.S. Geological Survey	USGS		36.5458	-79.6917	0.01				UNKNOWN	SEDIMENTARY	UNKNOWN	UNKNOWN	BLACK-SHALE																			10	28		64		0.054
W219198		USGS		Geochemistry of rock samples from the National Geochemical Database: U.S. Geological Survey, Reston, VA.	U.S. Geological Survey	USGS		36.5458	-79.6917	0.01				UNKNOWN	SEDIMENTARY	UNKNOWN	UNKNOWN	BLACK-SHALE																			15	34		95		0.076
W219199		USGS		Geochemistry of rock samples from the National Geochemical Database: U.S. Geological Survey, Reston, VA.	U.S. Geological Survey	USGS		36.5458	-79.6917	0.01				UNKNOWN	SEDIMENTARY	UNKNOWN	UNKNOWN	BLACK-SHALE																			18	58		120		0.068
W219200		USGS		Geochemistry of rock samples from the National Geochemical Database: U.S. Geological Survey, Reston, VA.	U.S. Geological Survey	USGS		36.5458	-79.6917	0.01				UNKNOWN	SEDIMENTARY	UNKNOWN	UNKNOWN	BLACK-SHALE																			19	75		120		0.082
W219201		USGS		Geochemistry of rock samples from the National Geochemical Database: U.S. Geological Survey, Reston, VA.	U.S. Geological Survey	USGS		36.5458	-79.6917	0.01				UNKNOWN	SEDIMENTARY	UNKNOWN	UNKNOWN	BLACK-SHALE																			24	58		120		0.15
W219202		USGS		Geochemistry of rock samples from the National Geochemical Database: U.S. Geological Survey, Reston, VA.	U.S. Geological Survey	USGS		36.5419	-79.6731	0.01				UNKNOWN	SEDIMENTARY	UNKNOWN	UNKNOWN	BLACK-SHALE																			26	75		140		0.066
W237383		USGS		Geochemistry of rock samples from the National Geochemical Database: U.S. Geological Survey, Reston, VA.	U.S. Geological Survey	USGS		40.9167	-74.25	0.01				ES	SEDIMENTARY	UNKNOWN	UNKNOWN	BLACK-SHALE															30	4.2	1200	55	19	65		88		0.31	13	13	7.5	72	110
W237386		USGS		Geochemistry of rock samples from the National Geochemical Database: U.S. Geological Survey, Reston, VA.	U.S. Geological Survey	USGS		41.6667	-72.5	0.01				ES	SEDIMENTARY	UNKNOWN	UNKNOWN	BLACK-SHALE															30	5.5	1000	58	18	97		140		0.23	15	12	3.5	48	54
W237387		USGS		Geochemistry of rock samples from the National Geochemical Database: U.S. Geological Survey, Reston, VA.	U.S. Geological Survey	USGS		41.6667	-72.5	0.01				ES	SEDIMENTARY	UNKNOWN	UNKNOWN	BLACK-SHALE																7.6	1300	70	28	85		360		0.37	24	1.8	3.9	62	80
W237394		USGS		Geochemistry of rock samples from the National Geochemical Database: U.S. Geological Survey, Reston, VA.	U.S. Geological Survey	USGS		41.6667	-72.7	0.01				ES	SEDIMENTARY	UNKNOWN	UNKNOWN	BLACK-SHALE															29	2.6	990	28	7.8	47		140		0.19	3.6	12	11
[truncated: 56 more columns]

## Sheet: References
References
AUTHOR	YEAR	TITLE	JOURNAL
USGS	2008	Geochemistry of rock samples from the National Geochemical Database: U.S. Geological Survey, Reston, VA.	U.S. Geological Survey
