# Supplementary material for: Basic chemical compositions combination rules and quantitative criterion of red beds
Source: Copernicus journal article supplement (doi:10.5194/egusphere-2023-2590), 2024-01-29
Supplement: Supplementary file 3 [file Supplementary Table 11-breccia_EarthChem.xlsx]

## Sheet: Data
EarthChem Download: Wednesday, May. 10, 2023 7:18:24 am
Search Criteria:
Material	sedimentary
Rock Name	breccia
SAMPLE ID	IGSN	SOURCE	DOI	TITLE	JOURNAL	AUTHOR	CRUISEID	LATITUDE	LONGITUDE	LOC PREC	MIN AGE	AGE	MAX AGE	METHOD	MATERIAL	TYPE	COMPOSITION	ROCK NAME	MINERAL	SIO2	TIO2	AL2O3	CR2O3	FE2O3	FE2O3T	FEO	FEOT	MNO	MGO	CAO	NA2O	K2O	P2O5	BAO	LOI	H2O	H2O_M	H2O_P	SI	FE	MN	NI	CO	CU	CD	ZN	AS	AG	S
OKU36		GEOROC		THE GEOCHEMICAL EVOLUTION OF THE ALKALINE AND CARBONATITE COMPLEXES OF THE DAMARALAND IGNEOUS PROVINCE, SOUTH WEST AFRICA	ANN. UNIV. STELLENBOSCH SER. A1 (GEOL.)	PRINS, P.		-20.09	16.8	0.01				XRF	SEDIMENTARY			BRECCIA		37.99	0.39	10.73		9.99				0.37	3.72	9.45	0.14	9.38	0.05
OKU36		GEOROC		THE GEOCHEMICAL EVOLUTION OF THE ALKALINE AND CARBONATITE COMPLEXES OF THE DAMARALAND IGNEOUS PROVINCE, SOUTH WEST AFRICA	ANN. UNIV. STELLENBOSCH SER. A1 (GEOL.)	PRINS, P.		-20.09	16.8	0.01				WET	SEDIMENTARY			BRECCIA																			1.1	2.83
C658		GEOROC	10.1016/0016-7037(92)90360-U	PETROGENESIS OF LATE CENOZOIC VOLCANIC ROCKS FROM THE TAUPO VOLCANIC ZONE, NEW ZEALAND, IN THE LIGHT OF NEW LEAD ISOTOPE DATA	GEOCHIM. COSMOCHIM. ACTA	GRAHAM, I. J.; GULSON, B. L.; HEDENQUIST, J. W.; MIZON, K.		-39	176	0.1				TIMS	SEDIMENTARY			BRECCIA
C658		GEOROC	10.1016/0016-7037(92)90360-U	PETROGENESIS OF LATE CENOZOIC VOLCANIC ROCKS FROM THE TAUPO VOLCANIC ZONE, NEW ZEALAND, IN THE LIGHT OF NEW LEAD ISOTOPE DATA	GEOCHIM. COSMOCHIM. ACTA	GRAHAM, I. J.; GULSON, B. L.; HEDENQUIST, J. W.; MIZON, K.		-39	176	0.1				TIMS_ID	SEDIMENTARY			BRECCIA
D997		GEOROC	10.1016/0016-7037(92)90360-U	PETROGENESIS OF LATE CENOZOIC VOLCANIC ROCKS FROM THE TAUPO VOLCANIC ZONE, NEW ZEALAND, IN THE LIGHT OF NEW LEAD ISOTOPE DATA	GEOCHIM. COSMOCHIM. ACTA	GRAHAM, I. J.; GULSON, B. L.; HEDENQUIST, J. W.; MIZON, K.		-37.7667	176.45	0.0001				TIMS	SEDIMENTARY			BRECCIA
D997		GEOROC	10.1016/0016-7037(92)90360-U	PETROGENESIS OF LATE CENOZOIC VOLCANIC ROCKS FROM THE TAUPO VOLCANIC ZONE, NEW ZEALAND, IN THE LIGHT OF NEW LEAD ISOTOPE DATA	GEOCHIM. COSMOCHIM. ACTA	GRAHAM, I. J.; GULSON, B. L.; HEDENQUIST, J. W.; MIZON, K.		-37.7667	176.45	0.0001				TIMS_ID	SEDIMENTARY			BRECCIA
A303A		GEOROC	10.1016/0016-7037(92)90360-U	PETROGENESIS OF LATE CENOZOIC VOLCANIC ROCKS FROM THE TAUPO VOLCANIC ZONE, NEW ZEALAND, IN THE LIGHT OF NEW LEAD ISOTOPE DATA	GEOCHIM. COSMOCHIM. ACTA	GRAHAM, I. J.; GULSON, B. L.; HEDENQUIST, J. W.; MIZON, K.		-39	176	0.1				TIMS	SEDIMENTARY			BRECCIA
A303A		GEOROC	10.1016/0016-7037(92)90360-U	PETROGENESIS OF LATE CENOZOIC VOLCANIC ROCKS FROM THE TAUPO VOLCANIC ZONE, NEW ZEALAND, IN THE LIGHT OF NEW LEAD ISOTOPE DATA	GEOCHIM. COSMOCHIM. ACTA	GRAHAM, I. J.; GULSON, B. L.; HEDENQUIST, J. W.; MIZON, K.		-39	176	0.1				TIMS_ID	SEDIMENTARY			BRECCIA
A303B		GEOROC	10.1016/0016-7037(92)90360-U	PETROGENESIS OF LATE CENOZOIC VOLCANIC ROCKS FROM THE TAUPO VOLCANIC ZONE, NEW ZEALAND, IN THE LIGHT OF NEW LEAD ISOTOPE DATA	GEOCHIM. COSMOCHIM. ACTA	GRAHAM, I. J.; GULSON, B. L.; HEDENQUIST, J. W.; MIZON, K.		-39	176	0.1				TIMS	SEDIMENTARY			BRECCIA
A303B		GEOROC	10.1016/0016-7037(92)90360-U	PETROGENESIS OF LATE CENOZOIC VOLCANIC ROCKS FROM THE TAUPO VOLCANIC ZONE, NEW ZEALAND, IN THE LIGHT OF NEW LEAD ISOTOPE DATA	GEOCHIM. COSMOCHIM. ACTA	GRAHAM, I. J.; GULSON, B. L.; HEDENQUIST, J. W.; MIZON, K.		-39	176	0.1				TIMS_ID	SEDIMENTARY			BRECCIA
C654		GEOROC	10.1016/0016-7037(92)90360-U	PETROGENESIS OF LATE CENOZOIC VOLCANIC ROCKS FROM THE TAUPO VOLCANIC ZONE, NEW ZEALAND, IN THE LIGHT OF NEW LEAD ISOTOPE DATA	GEOCHIM. COSMOCHIM. ACTA	GRAHAM, I. J.; GULSON, B. L.; HEDENQUIST, J. W.; MIZON, K.		-39	176	0.1				TIMS	SEDIMENTARY			BRECCIA
C654		GEOROC	10.1016/0016-7037(92)90360-U	PETROGENESIS OF LATE CENOZOIC VOLCANIC ROCKS FROM THE TAUPO VOLCANIC ZONE, NEW ZEALAND, IN THE LIGHT OF NEW LEAD ISOTOPE DATA	GEOCHIM. COSMOCHIM. ACTA	GRAHAM, I. J.; GULSON, B. L.; HEDENQUIST, J. W.; MIZON, K.		-39	176	0.1				TIMS_ID	SEDIMENTARY			BRECCIA
L-8		GEOROC	10.1016/j.epsl.2006.05.003	TRACE ELEMENT AND ISOTOPIC EVIDENCE FOR ARCHEAN BASEMENT IN THE LONAR CRATER IMPACT BRECCIA, DECCAN VOLCANIC PROVINCE	EARTH PLANET. SCI. LETT.	CHAKRABARTI, R.; BASU, A. R.		19.97	76.52	0.01				ICPMS	SEDIMENTARY			BRECCIA
L-8		GEOROC	10.1016/j.epsl.2006.05.003	TRACE ELEMENT AND ISOTOPIC EVIDENCE FOR ARCHEAN BASEMENT IN THE LONAR CRATER IMPACT BRECCIA, DECCAN VOLCANIC PROVINCE	EARTH PLANET. SCI. LETT.	CHAKRABARTI, R.; BASU, A. R.		19.97	76.52	0.01				TIMS	SEDIMENTARY			BRECCIA
L-6		GEOROC	10.1016/j.epsl.2006.05.003	TRACE ELEMENT AND ISOTOPIC EVIDENCE FOR ARCHEAN BASEMENT IN THE LONAR CRATER IMPACT BRECCIA, DECCAN VOLCANIC PROVINCE	EARTH PLANET. SCI. LETT.	CHAKRABARTI, R.; BASU, A. R.		19.97	76.52	0.01				ICPMS	SEDIMENTARY			BRECCIA
L-6		GEOROC	10.1016/j.epsl.2006.05.003	TRACE ELEMENT AND ISOTOPIC EVIDENCE FOR ARCHEAN BASEMENT IN THE LONAR CRATER IMPACT BRECCIA, DECCAN VOLCANIC PROVINCE	EARTH PLANET. SCI. LETT.	CHAKRABARTI, R.; BASU, A. R.		19.97	76.52	0.01				TIMS	SEDIMENTARY			BRECCIA
L-37X		GEOROC	10.1016/j.epsl.2006.05.003	TRACE ELEMENT AND ISOTOPIC EVIDENCE FOR ARCHEAN BASEMENT IN THE LONAR CRATER IMPACT BRECCIA, DECCAN VOLCANIC PROVINCE	EARTH PLANET. SCI. LETT.	CHAKRABARTI, R.; BASU, A. R.		19.97	76.52	0.01				ICPMS	SEDIMENTARY			BRECCIA
L-37X		GEOROC	10.1016/j.epsl.2006.05.003	TRACE ELEMENT AND ISOTOPIC EVIDENCE FOR ARCHEAN BASEMENT IN THE LONAR CRATER IMPACT BRECCIA, DECCAN VOLCANIC PROVINCE	EARTH PLANET. SCI. LETT.	CHAKRABARTI, R.; BASU, A. R.		19.97	76.52	0.01				TIMS	SEDIMENTARY			BRECCIA
L-4		GEOROC	10.1016/j.epsl.2006.05.003	TRACE ELEMENT AND ISOTOPIC EVIDENCE FOR ARCHEAN BASEMENT IN THE LONAR CRATER IMPACT BRECCIA, DECCAN VOLCANIC PROVINCE	EARTH PLANET. SCI. LETT.	CHAKRABARTI, R.; BASU, A. R.		19.97	76.52	0.01				ICPMS	SEDIMENTARY			BRECCIA
L-4		GEOROC	10.1016/j.epsl.2006.05.003	TRACE ELEMENT AND ISOTOPIC EVIDENCE FOR ARCHEAN BASEMENT IN THE LONAR CRATER IMPACT BRECCIA, DECCAN VOLCANIC PROVINCE	EARTH PLANET. SCI. LETT.	CHAKRABARTI, R.; BASU, A. R.		19.97	76.52	0.01				TIMS	SEDIMENTARY			BRECCIA
L-27A		GEOROC	10.1016/j.epsl.2006.05.003	TRACE ELEMENT AND ISOTOPIC EVIDENCE FOR ARCHEAN BASEMENT IN THE LONAR CRATER IMPACT BRECCIA, DECCAN VOLCANIC PROVINCE	EARTH PLANET. SCI. LETT.	CHAKRABARTI, R.; BASU, A. R.		19.97	76.52	0.01				ICPMS	SEDIMENTARY			BRECCIA
L-27A		GEOROC	10.1016/j.epsl.2006.05.003	TRACE ELEMENT AND ISOTOPIC EVIDENCE FOR ARCHEAN BASEMENT IN THE LONAR CRATER IMPACT BRECCIA, DECCAN VOLCANIC PROVINCE	EARTH PLANET. SCI. LETT.	CHAKRABARTI, R.; BASU, A. R.		19.97	76.52	0.01				TIMS	SEDIMENTARY			BRECCIA
H800		GEOROC	10.1016/j.precamres.2005.11.013	CHARACTER OF FLUIDS ASSOCIATED WITH HYDROTHERMAL ALTERATION AND METAMORPHISM OF PALAEOPROTEROZOIC SUBMARINE VOLCANIC ROCKS, BAFFIN ISLAND, NUNAVUT, CANADA	PREC. RESEARCH	JOHNS, S. M.; KYSER, T. K.; HELMSTAEDT, H. H.		68.4558	-73.9958	0.0001	1900	1900	1900	MS	SEDIMENTARY			BRECCIA
H800		GEOROC	10.1139/E06-009	PALEOPROTEROZOIC SUBMARINE INTRABASINAL RIFTING, BAFFIN ISLAND, NUNAVUT, CANADA: VOLCANIC STRUCTURE AND GEOCHEMISTRY OF THE BRAVO LAKE FORMATION	CAN. J. EARTH SCI.	JOHNS, S. M.; HELMSTAEDT, H. H.; KYSER, T. K.		68.4558	-73.9958	0.0001	1900	1900	1900	XRF	SEDIMENTARY			BRECCIA		51.21	2.01	13.92	0.02		13.92			0.12	4.93	6.63	5.11	1.31	0.22
H800		GEOROC	10.1139/E06-009	PALEOPROTEROZOIC SUBMARINE INTRABASINAL RIFTING, BAFFIN ISLAND, NUNAVUT, CANADA: VOLCANIC STRUCTURE AND GEOCHEMISTRY OF THE BRAVO LAKE FORMATION	CAN. J. EARTH SCI.	JOHNS, S. M.; HELMSTAEDT, H. H.; KYSER, T. K.		68.4558	-73.9958	0.0001	1900	1900	1900	IGN	SEDIMENTARY			BRECCIA																	0.25
H800		GEOROC	10.1139/E06-009	PALEOPROTEROZOIC SUBMARINE INTRABASINAL RIFTING, BAFFIN ISLAND, NUNAVUT, CANADA: VOLCANIC STRUCTURE AND GEOCHEMISTRY OF THE BRAVO LAKE FORMATION	CAN. J. EARTH SCI.	JOHNS, S. M.; HELMSTAEDT, H. H.; KYSER, T. K.		68.4558	-73.9958	0.0001	1900	1900	1900	ICPMS	SEDIMENTARY			BRECCIA																								72	47.7	5.7		83
197-1205-21R-2,42-46		GEOROC	10.1029/2006GC001400	GEOCHEMICAL FLUXES RELATED TO ALTERATION OF A SUBAERIALLY EXPOSED SEAMOUNT: NINTOKU SEAMOUNT, ODP LEG 197, SITE 1205	GEOCHEMISTRY GEOPHYSICS GEOSYSTEMS	REVILLON, S.; TEAGLE, D. A. H.; BOULVAIS, P.; SHAFER, J. T.; NEAL, C. R.		41	-170	0.1				ICPAES	SEDIMENTARY			BRECCIA		27.7	2.07	10.9		11.85				0.19	2.76	16.4	1.24	1.04	0.53									51	34						19
197-1205-21R-2,42-46		GEOROC	10.1029/2006GC001400	GEOCHEMICAL FLUXES RELATED TO ALTERATION OF A SUBAERIALLY EXPOSED SEAMOUNT: NINTOKU SEAMOUNT, ODP LEG 197, SITE 1205	GEOCHEMISTRY GEOPHYSICS GEOSYSTEMS	REVILLON, S.; TEAGLE, D. A. H.; BOULVAIS, P.; SHAFER, J. T.; NEAL, C. R.		41	-170	0.1				CIR	SEDIMENTARY			BRECCIA																		18.94
197-1205-21R-2,42-46		GEOROC	10.1029/2006GC001400	GEOCHEMICAL FLUXES RELATED TO ALTERATION OF A SUBAERIALLY EXPOSED SEAMOUNT: NINTOKU SEAMOUNT, ODP LEG 197, SITE 1205	GEOCHEMISTRY GEOPHYSICS GEOSYSTEMS	REVILLON, S.; TEAGLE, D. A. H.; BOULVAIS, P.; SHAFER, J. T.; NEAL, C. R.		41	-170	0.1				TIT	SEDIMENTARY			BRECCIA								0.27
197-1205-21R-2,42-46		GEOROC	10.1029/2006GC001400	GEOCHEMICAL FLUXES RELATED TO ALTERATION OF A SUBAERIALLY EXPOSED SEAMOUNT: NINTOKU SEAMOUNT, ODP LEG 197, SITE 1205	GEOCHEMISTRY GEOPHYSICS GEOSYSTEMS	REVILLON, S.; TEAGLE, D. A. H.; BOULVAIS, P.; SHAFER, J. T.; NEAL, C. R.		41	-170	0.1				ICPMS	SEDIMENTARY			BRECCIA
197-1205-21R-2,42-46		GEOROC	10.1029/2006GC001400	GEOCHEMICAL FLUXES RELATED TO ALTERATION OF A SUBAERIALLY EXPOSED SEAMOUNT: NINTOKU SEAMOUNT, ODP LEG 197, SITE 1205	GEOCHEMISTRY GEOPHYSICS GEOSYSTEMS	REVILLON, S.; TEAGLE, D. A. H.; BOULVAIS, P.; SHAFER, J. T.; NEAL, C. R.		41	-170	0.1				TIMS	SEDIMENTARY			BRECCIA
197-1205-21R-2,42-46		GEOROC	10.1029/2006GC001400	GEOCHEMICAL FLUXES RELATED TO ALTERATION OF A SUBAERIALLY EXPOSED SEAMOUNT: NINTOKU SEAMOUNT, ODP LEG 197, SITE 1205	GEOCHEMISTRY GEOPHYSICS GEOSYSTEMS	REVILLON, S.; TEAGLE, D. A. H.; BOULVAIS, P.; SHAFER, J. T.; NEAL, C. R.		41	-170	0.1				MS	SEDIMENTARY			BRECCIA
197-1205-35R-5,24-31		GEOROC	10.1029/2006GC001400	GEOCHEMICAL FLUXES RELATED TO ALTERATION OF A SUBAERIALLY EXPOSED SEAMOUNT: NINTOKU SEAMOUNT, ODP LEG 197, SITE 1205	GEOCHEMISTRY GEOPHYSICS GEOSYSTEMS	REVILLON, S.; TEAGLE, D. A. H.; BOULVAIS, P.; SHAFER, J. T.; NEAL, C. R.		41	-170	0.1				ICPAES	SEDIMENTARY			BRECCIA		33.15	3.82	21.3		22.8				0.25	1.75	1.99	1.12	0.22	0.12									360	75						4
197-1205-35R-5,24-31		GEOROC	10.1029/2006GC001400	GEOCHEMICAL FLUXES RELATED TO ALTERATION OF A SUBAERIALLY EXPOSED SEAMOUNT: NINTOKU SEAMOUNT, ODP LEG 197, SITE 1205	GEOCHEMISTRY GEOPHYSICS GEOSYSTEMS	REVILLON, S.; TEAGLE, D. A. H.; BOULVAIS, P.; SHAFER, J. T.; NEAL, C. R.		41	-170	0.1				CIR	SEDIMENTARY			BRECCIA																		12.38
197-1205-35R-5,24-31		GEOROC	10.1029/2006GC001400	GEOCHEMICAL FLUXES RELATED TO ALTERATION OF A SUBAERIALLY EXPOSED SEAMOUNT: NINTOKU SEAMOUNT, ODP LEG 197, SITE 1205	GEOCHEMISTRY GEOPHYSICS GEOSYSTEMS	REVILLON, S.; TEAGLE, D. A. H.; BOULVAIS, P.; SHAFER, J. T.; NEAL, C. R.		41	-170	0.1				TIT	SEDIMENTARY			BRECCIA								0.27
197-1205-35R-5,24-31		GEOROC	10.1029/2006GC001400	GEOCHEMICAL FLUXES RELATED TO ALTERATION OF A SUBAERIALLY EXPOSED SEAMOUNT: NINTOKU SEAMOUNT, ODP LEG 197, SITE 1205	GEOCHEMISTRY GEOPHYSICS GEOSYSTEMS	REVILLON, S.; TEAGLE, D. A. H.; BOULVAIS, P.; SHAFER, J. T.; NEAL, C. R.		41	-170	0.1				ICPMS	SEDIMENTARY			BRECCIA
197-1205-35R-5,24-31		GEOROC	10.1029/2006GC001400	GEOCHEMICAL FLUXES RELATED TO ALTERATION OF A SUBAERIALLY EXPOSED SEAMOUNT: NINTOKU SEAMOUNT, ODP LEG 197, SITE 1205	GEOCHEMISTRY GEOPHYSICS GEOSYSTEMS	REVILLON, S.; TEAGLE, D. A. H.; BOULVAIS, P.; SHAFER, J. T.; NEAL, C. R.		41	-170	0.1				TIMS	SEDIMENTARY			BRECCIA
197-1205-35R-5,24-31		GEOROC	10.1029/2006GC001400	GEOCHEMICAL FLUXES RELATED TO ALTERATION OF A SUBAERIALLY EXPOSED SEAMOUNT: NINTOKU SEAMOUNT, ODP LEG 197, SITE 1205	GEOCHEMISTRY GEOPHYSICS GEOSYSTEMS	REVILLON, S.; TEAGLE, D. A. H.; BOULVAIS, P.; SHAFER, J. T.; NEAL, C. R.		41	-170	0.1				MS	SEDIMENTARY			BRECCIA
F20		GEOROC	10.1007/BF00399605	THE COMPARATIVE STRONTIUM ISOTOPIC COMPOSITION OF ALKALINE ROCKS: NEW DATA FROM SOUTHERN PORTUGAL AND EAST AFRICA	CONTRIB. MINERAL. PETROL.	ROCK, N. M. S.		37.32	-8.55	0.01				TIMS	SEDIMENTARY			BRECCIA
F20		GEOROC	10.1007/BF00399605	THE COMPARATIVE STRONTIUM ISOTOPIC COMPOSITION OF ALKALINE ROCKS: NEW DATA FROM SOUTHERN PORTUGAL AND EAST AFRICA	CONTRIB. MINERAL. PETROL.	ROCK, N. M. S.		37.32	-8.55	0.01				XRF	SEDIMENTARY			BRECCIA
LA1/68-07		GEOROC	10.1093/petrology/egr011	MULTISTAGE EVOLUTION OF DOLERITES IN THE KAROO LARGE IGNEOUS PROVINCE, CENTRAL SOUTH AFRICA	J. PETROL.	NEUMANN, E.-R.; SVENSEN, H.; GALERNE, C. Y.; PLANKE, S.		-31.88	26.27	0.01				ICPMS	SEDIMENTARY			BRECCIA																								16	9	12		63
LA1/68-07		GEOROC	10.1093/petrology/egr011	MULTISTAGE EVOLUTION OF DOLERITES IN THE KAROO LARGE IGNEOUS PROVINCE, CENTRAL SOUTH AFRICA	J. PETROL.	NEUMANN, E.-R.; SVENSEN, H.; GALERNE, C. Y.; PLANKE, S.		-31.88	26.27	0.01				ICPAES	SEDIMENTARY			BRECCIA		77.12	0.58	10.29			3.71			0.06	0.74	1.07	0.74	1.82	0.04
B		GEOROC	10.1130/0016-7606(1969)80[573:GBAPCV]2.0.CO;2	GROSS BRUKKAROS, A PROBABLE CARBONATITE VOLCANO IN THE NAMA PLATEAU OF SOUTHWEST AFRICA	BULL. GEOL. SOC. AM.	JANSE, A. J. A.		-25.87	17.78	0.01				XRF	SEDIMENTARY			BRECCIA		66.5	1	7.2		6.1		1.77		0.1	3.2	6.4	3.54	1.35					0.34	1.52
C		GEOROC	10.1130/0016-7606(1969)80[573:GBAPCV]2.0.CO;2	GROSS BRUKKAROS, A PROBABLE CARBONATITE VOLCANO IN THE NAMA PLATEAU OF SOUTHWEST AFRICA	BULL. GEOL. SOC. AM.	JANSE, A. J. A.		-25.87	17.78	0.01				XRF	SEDIMENTARY			BRECCIA		51	0.9	11.5		8.34		1.04		0.19	3	7.4	4.49	2.46					0.32	2.97
D		GEOROC	10.1130/0016-7606(1969)80[573:GBAPCV]2.0.CO;2	GROSS BRUKKAROS, A PROBABLE CARBONATITE VOLCANO IN THE NAMA PLATEAU OF SOUTHWEST AFRICA	BULL. GEOL. SOC. AM.	JANSE, A. J. A.		-25.87	17.78	0.01				XRF	SEDIMENTARY			BRECCIA		63.5	0.75	11.5		5.8		2.13		0.11	3.5	5.99	3.53	2.5					0.08	1.7
E		GEOROC	10.1130/0016-7606(1969)80[573:GBAPCV]2.0.CO;2	GROSS BRUKKAROS, A PROBABLE CARBONATITE VOLCANO IN THE NAMA PLATEAU OF SOUTHWEST AFRICA	BULL. GEOL. SOC. AM.	JANSE, A. J. A.		-25.87	17.78	0.01				XRF	SEDIMENTARY			BRECCIA		65.5	0.57	10.8		4.43		3.21		0.15	2.5	4.2	1.68	4.3					1.41	1.02
F		GEOROC	10.1130/0016-7606(1969)80[573:GBAPCV]2.0.CO;2	GROSS BRUKKAROS, A PROBABLE CARBONATITE VOLCANO IN THE NAMA PLATEAU OF SOUTHWEST AFRICA	BULL. GEOL. SOC. AM.	JANSE, A. J. A.		-25.87	17.78	0.01				XRF	SEDIMENTARY			BRECCIA		64	0.69	11.8		4.77		2.97		0.09	2.9	4.32	1.62	5.34					1.16	1.08
I		GEOROC	10.1130/0016-7606(1969)80[573:GBAPCV]2.0.CO;2	GROSS BRUKKAROS, A PROBABLE CARBONATITE VOLCANO IN THE NAMA PLATEAU OF SOUTHWEST AFRICA	BULL. GEOL. SOC. AM.	JANSE, A. J. A.		-25.87	17.78	0.01				XRF	SEDIMENTARY			BRECCIA		42.5	1.23	6.5		4.53		3.48		0.13	9.7	14.4	3.06	1.73					0.58	3.54
ABO475		USGS		Geochemistry of rock samples from the National Geochemical Database: U.S. Geological Survey, Reston, VA.	U.S. Geological Survey	USGS		35.9231	-81.7339	0.01				COL	SEDIMENTARY	UNKNOWN	UNKNOWN	BRECCIA																										10			10
ABO475		USGS		Geochemistry of rock samples from the National Geochemical Database: U.S. Geological Survey, Reston, VA.	U.S. Geological Survey	USGS		35.9231	-81.7339	0.01				ES	SEDIMENTARY	UNKNOWN	UNKNOWN	BRECCIA																						7	2000	10	15	150		200
ADB110		USGS		Geochemistry of rock samples from the National Geochemical Database: U.S. Geological Survey, Reston, VA.	U.S. Geological Survey	USGS		64.5717	-142.899	0.01				ES	SEDIMENTARY	UNKNOWN	UNKNOWN	BRECCIA																						1.5	100	5	5
AE793		USGS		Geochemistry of rock samples from the National Geochemical Database: U.S. Geological Survey, Reston, VA.	U.S. Geological Survey	USGS		17.9917	-66.9917	0.01				AAS	SEDIMENTARY	UNKNOWN	UNKNOWN	BRECCIA																										34		32
AE793		USGS		Geochemistry of rock samples from the National Geochemical Database: U.S. Geological Survey, Reston, VA.	U.S. Geological Survey	USGS		17.9917	-66.9917	0.01				ES	SEDIMENTARY	UNKNOWN	UNKNOWN	BRECCIA																						2	1500	30	15	70
AF534		USGS		Geochemistry of rock samples from the National Geochemical Database: U.S. Geological Survey, Reston, VA.	U.S. Geological Survey	USGS		18.1208	-67.025	0.01				AAS	SEDIMENTARY	UNKNOWN	UNKNOWN	BRECCIA																												30
AF534		USGS		Geochemistry of rock samples from the National Geochemical Database: U.S. Geological Survey, Reston, VA.	U.S. Geological Survey	USGS		18.1208	-67.025	0.01				COL	SEDIMENTARY	UNKNOWN	UNKNOWN	BRECCIA																													60
AF534		USGS		Geochemistry of rock samples from the National Geochemical Database: U.S. Geological Survey, Reston, VA.	U.S. Geological Survey	USGS		18.1208	-67.025	0.01				ES	SEDIMENTARY	UNKNOWN	UNKNOWN	BRECCIA																						1.5	300		10	150
AF636		USGS		Geochemistry of rock samples from the National Geochemical Database: U.S. Geological Survey, Reston, VA.	U.S. Geological Survey	USGS		18.1056	-67.0208	0.01				AAS	SEDIMENTARY	UNKNOWN	UNKNOWN	BRECCIA																												71
AF636		USGS		Geochemistry of rock samples from the National Geochemical Database: U.S. Geological Survey, Reston, VA.	U.S. Geological Survey	USGS		18.1056	-67.0208	0.01				ES	SEDIMENTARY	UNKNOWN	UNKNOWN	BRECCIA																						5	700	10	15	7000
AF729		USGS		Geochemistry of rock samples from the National Geochemical Database: U.S. Geological Survey, Reston, VA.	U.S. Geological Survey	USGS		18.1092	-66.9158	0.01				AAS	SEDIMENTARY	UNKNOWN	UNKNOWN	BRECCIA																												42
AF729		USGS		Geochemistry of rock samples from the National Geochemical Database: U.S. Geological Survey, Reston, VA.	U.S. Geological Survey	USGS		18.1092	-66.9158	0.01				ES	SEDIMENTARY	UNKNOWN	UNKNOWN	BRECCIA																						5	500	70	15	500
AGH650		USGS		Geochemistry of rock samples from the National Geochemical Database: U.S. Geological Survey, Reston, VA.	U.S. Geological Survey	USGS		64.7958	-141.186	0.01				ES	SEDIMENTARY	UNKNOWN	UNKNOWN	BRECCIA																						20	500	150	2000	700
AGH727		USGS		Geochemistry of rock samples from the National Geochemical Database: U.S. Geological Survey, Reston, VA.	U.S. Geological Survey	USGS		64.8911	-142.189	0.01				ES	SEDIMENTARY	UNKNOWN	UNKNOWN	BRECCIA																						10	2000	70	20	70
AGH732		USGS		Geochemistry of rock samples from the National Geochemical Database: U.S. Geological Survey, Reston, VA.	U.S. Geological Survey	USGS		64.9375	-142.183	0.01				ES	SEDIMENTARY	UNKNOWN	UNKNOWN	BRECCIA																						1.5	150	5		15
AHO175		USGS		Geochemistry of rock samples from the National Geochemical Database: U.S. Geological Survey, Reston, VA.	U.S. Geological Survey	USGS		43.4236	-109.593	0.01				ES	SEDIMENTARY	UNKNOWN	UNKNOWN	BRECCIA																						0.5	50	2		5
AKB938		USGS		Geochemistry of rock samples from the National Geochemical Database: U.S. Geological Survey, Reston, VA.	U.S. Geological Survey	USGS		64.3914	-142.741	0.01				ES	SEDIMENTARY	UNKNOWN	UNKNOWN	BRECCIA																						3	300	20		5
AKF184		USGS		Geochemistry of rock samples from the National Geochemical Database: U.S. Geological Survey, Reston, VA.	U.S. Geological Survey	USGS		40.9283	-117.323	0.01				AAS	SEDIMENTARY	UNKNOWN	UNKNOWN	BRECCIA																										90		44		200
AKF184		USGS		Geochemistry of rock samples from the National Geochemical Database: U.S. Geological Survey, Reston, VA.	U.S. Geological Survey	USGS		40.9283	-117.323	0.01				COL	SEDIMENTARY	UNKNOWN	UNKNOWN	BRECCIA																													800
AKF184		USGS		Geochemistry of rock samples from the National Geochemical Database: U.S. Geological Survey, Reston, VA.	U.S. Geological Survey	USGS		40.9283	-117.323	0.01				ES	SEDIMENTARY	UNKNOWN	UNKNOWN	BRECCIA																						1	30	10		30			1500	500
AKF717		USGS		Geochemistry of rock samples from the National Geochemical Database: U.S. Geological Survey, Reston, VA.	U.S. Geological Survey	USGS		40.9197	-117.319	0.01				AAS	SEDIMENTARY	UNKNOWN	UNKNOWN	BRECCIA																										17				0.2
AKF717		USGS		Geochemistry of rock samples from the National Geochemical Database: U.S. Geological Survey, Reston, VA.	U.S. Geological Survey	USGS		40.9197	-117.319	0.01				COL	SEDIMENTARY	UNKNOWN	UNKNOWN	BRECCIA																													160
AKF717		USGS		Geochemistry of rock samples from the National Geochemical Database: U.S. Geological Survey, Reston, VA.	U.S. Geological Survey	USGS		40.9197	-117.319	0.01				ES	SEDIMENTARY	UNKNOWN	UNKNOWN	BRECCIA																						10	200	30	5	30			700
AMN634		USGS		Geochemistry of rock samples from the National Geochemical Database: U.S. Geological Survey, Reston, VA.	U.S. Geological Survey	USGS		45.0558	-109.946	0.01	3	3	3	AAS	SEDIMENTARY	UNKNOWN	UNKNOWN	BRECCIA
AMN634		USGS		Geochemistry of rock samples from the National Geochemical Database: U.S. Geological Survey, Reston, VA.	U.S. Geological Survey	USGS		45.0558	-109.946	0.01	3	3	3	ES	SEDIMENTARY	UNKNOWN	UNKNOWN	BRECCIA																						10	1000	20						150
AMN635		USGS		Geochemistry of rock samples from the National Geochemical Database: U.S. Geological Survey, Reston, VA.	U.S. Geological Survey	USGS		45.0558	-109.946	0.01	3	3	3	AAS	SEDIMENTARY	UNKNOWN	UNKNOWN	BRECCIA
AMN635		USGS		Geochemistry of rock samples from the National Geochemical Database: U.S. Geological Survey, Reston, VA.	U.S. Geological Survey	USGS		45.0558	-109.946	0.01	3	3	3	ES	SEDIMENTARY	UNKNOWN	UNKNOWN	BRECCIA																						15	3000	30				200		700
AMN711		USGS		Geochemistry of rock samples from the National Geochemical Database: U.S. Geological Survey, Reston, VA.	U.S. Geological Survey	USGS		45.0686	-109.958	0.01	3	3	3	AAS	SEDIMENTARY	UNKNOWN	UNKNOWN	BRECCIA
AMN711		USGS		Geochemistry of rock samples from the National Geochemical Database: U.S. Geological Survey, Reston, VA.	U.S. Geological Survey	USGS		45.0686	-109.958	0.01	3	3	3	ES	SEDIMENTARY	UNKNOWN	UNKNOWN	BRECCIA																						20	50	7		2000				1
AMN774		USGS		Geochemistry of rock samples from the National Geochemical Database: U.S. Geological Survey, Reston, VA.	U.S. Geological Survey	USGS		45.0594	-109.944	0.01	67	67	67	AAS	SEDIMENTARY	UNKNOWN	UNKNOWN	BRECCIA
AMN774		USGS		Geochemistry of rock samples from the National Geochemical Database: U.S. Geological Survey, Reston, VA.	U.S. Geological Survey	USGS		45.0594	-109.944	0.01	67	67	67	ES	SEDIMENTARY	UNKNOWN	UNKNOWN	BRECCIA																						3	700	50		1500				3
BAF032		USGS		Geochemistry of rock samples from the National Geochemical Database: U.S. Geological Survey, Reston, VA.	U.S. Geological Survey	USGS		59.3844	-136.368	0.01				ES	SEDIMENTARY	UNKNOWN	UNKNOWN	BRECCIA																						5	1000		15	30			200
BAF042		USGS		Geochemistry of rock samples from the National Geochemical Database: U.S. Geological Survey, Reston, VA.	U.S. Geological Survey	USGS		61.6772	-143.734	0.01				ES	SEDIMENTARY	UNKNOWN	UNKNOWN	BRECCIA																						3	1000	20	7	70
BAF105		USGS		Geochemistry of rock samples from the National Geochemical Database: U.S. Geological Survey, Reston, VA.	U.S. Geological Survey	USGS		59.25	-136.125	0.01				ES	SEDIMENTARY	UNKNOWN	UNKNOWN	BRECCIA																							70	15		300		1000		1
BAL362		USGS		Geochemistry of rock samples from the National Geochemical Database: U.S. Geological Survey, Reston, VA.	U.S. Geological Survey	USGS		62.0442	-141.215	0.01				ES	SEDIMENTARY	UNKNOWN	UNKNOWN	BRECCIA																						10	1000	15	30	1500
BAN160		USGS		Geochemistry of rock samples from the National Geochemical Database: U.S. Geological Survey, Reston, VA.	U.S. Geological Survey	USGS		61.1278	-149.058	0.01				AAS	SEDIMENTARY	UNKNOWN	UNKNOWN	BRECCIA
BAN160		USGS		Geochemistry of rock samples from the National Geochemical Database: U.S. Geological Survey, Reston, VA.	U.S. Geological Survey	USGS		61.1278	-149.058	0.01				ES	SEDIMENTARY	UNKNOWN	UNKNOWN	BRECCIA																						7	1500	30		300
BAT826		USGS		Geochemistry of rock samples from the National Geochemical Database: U.S. Geological Survey, Reston, VA.	U.S. Geological Survey	USGS		59.1597	-161.659	0.01				AAS	SEDIMENTARY	UNKNOWN	UNKNOWN	BRECCIA
BAT568		USGS		Geochemistry of rock samples from the National Geochemical Database: U.S. Geological Survey, Reston, VA.	U.S. Geological Survey	USGS		58.9333	-161.731	0.01				AAS	SEDIMENTARY	UNKNOWN	UNKNOWN	BRECCIA
BAT568		USGS		Geochemistry of rock samples from the National Geochemical Database: U.S. Geological Survey, Reston, VA.	U.S. Geological Survey	USGS		58.9333	-161.731	0.01				ES	SEDIMENTARY	UNKNOWN	UNKNOWN	BRECCIA																						10	1500	150	70	70
BAT753		USGS		Geochemistry of rock samples from the National Geochemical Database: U.S. Geological Survey, Reston, VA.	U.S. Geological Survey	USGS		58.6514	-161.944	0.01				AAS	SEDIMENTARY	UNKNOWN	UNKNOWN	BRECCIA
BAT753		USGS		Geochemistry of rock samples from the National Geochemical Database: U.S. Geological Survey, Reston, VA.	U.S. Geological Survey	USGS		58.6514	-161.944	0.01				ES	SEDIMENTARY	UNKNOWN	UNKNOWN	BRECCIA																						20	50	300	300	150				3
BAT826		USGS		Geochemistry of rock samples from the National Geochemical Database: U.S. Geological Survey, Reston, VA.	U.S. Geological Survey	USGS		59.1597	-161.659	0.01				ES	SEDIMENTARY	UNKNOWN	UNKNOWN	BRECCIA																						10	700	100	50	100
BBE195		USGS		Geochemistry of rock samples from the National Geochemical Database: U.S. Geological Survey, Reston, VA.	U.S. Geological Survey	USGS		45.08	-109.929	0.01	3	3	3	AAS	SEDIMENTARY	UNKNOWN	UNKNOWN	BRECCIA
BBE195		USGS		Geochemistry of rock samples from the National Geochemical Database: U.S. Geological Survey, Reston, VA.	U.S. Geological Survey	USGS		45.08	-109.929	0.01	3	3	3	ES	SEDIMENTARY	UNKNOWN	UNKNOWN	BRECCIA																						5	100	10	5	10				0.7
BDB712		USGS		Geochemistry of rock samples from the National Geochemical Database: U.S. Geological Survey, Reston, VA.	U.S. Geological Survey	USGS		55.1542	-131.785	0.01	73	73	73	AAS	SEDIMENTARY	UNKNOWN	UNKNOWN	BRECCIA
BDB712		USGS		Geochemistry of rock samples from the National Geochemical Database: U.S. Geological Survey, Reston, VA.	U.S. Geological Survey	USGS		55.1542	-131.785	0.01	73	73	73	ES	SEDIMENTARY	UNKNOWN	UNKNOWN	BRECCIA																						2	1000	10	20	20
BDB723		USGS		Geochemistry of rock samples from the National Geochemical Database: U.S. Geological Survey, Reston, VA.	U.S. Geological Survey	USGS		55.275	-131.849	0.01				AAS	SEDIMENTARY	UNKNOWN	UNKNOWN	BRECCIA
BDB723		USGS		Geochemistry of rock samples from the National Geochemical Database: U.S. Geological Survey, Reston, VA.	U.S. Geological Survey	USGS		55.275	-131.849	0.01				ES	SEDIMENTARY	UNKNOWN	UNKNOWN	BRECCIA																						15	5000	10	20	5
BDB724		USGS		Geochemistry of rock samples from the National Geochemical Database: U.S. Geological Survey, Reston, VA.	U.S. Geological Survey	USGS		55.2681	-131.844	0.01				AAS	SEDIMENTARY	UNKNOWN	UNKNOWN	BRECCIA
BDB724		USGS		Geochemistry of rock samples from the National Geochemical Database: U.S. Geological Survey, Reston, VA.	U.S. Geological Survey	USGS		55.2681	-131.844	0.01				ES	SEDIMENTARY	UNKNOWN	UNKNOWN	BRECCIA																						15	5000	10	50	20
BDB726		USGS		Geochemistry of rock samples from the National Geochemical Database: U.S. Geological Survey, Reston, VA.	U.S. Geological Survey	USGS		55.2639	-131.843	0.01				AAS	SEDIMENTARY	UNKNOWN	UNKNOWN	BRECCIA
BDB726		USGS		Geochemistry of rock samples from the National Geochemical Database: U.S. Geological Survey, Reston, VA.	U.S. Geological Survey	USGS		55.2639	-131.843	0.01				ES	SEDIMENTARY	UNKNOWN	UNKNOWN	BRECCIA																						20	100	20	20	20				1
BDB743		USGS		Geochemistry of rock samples from the National Geochemical Database: U.S. Geological Survey, Reston, VA.	U.S. Geological Survey	USGS		55.1958	-131.786	0.01	59	59	59	AAS	SEDIMENTARY	UNKNOWN	UNKNOWN	BRECCIA
BDB743		USGS		Geochemistry of rock samples from the National Geochemical Database: U.S. Geological Survey, Reston, VA.	U.S. Geological Survey	USGS		55.1958	-131.786	0.01	59	59	59	ES	SEDIMENTARY	UNKNOWN	UNKNOWN	BRECCIA																						20	500			10		700
BDB748		USGS		Geochemistry of rock samples from the National Geochemical Database: U.S. Geological Survey, Reston, VA.	U.S. Geological Survey	USGS		55.1903	-131.744	0.01				AAS	SEDIMENTARY	UNKNOWN	UNKNOWN	BRECCIA
BDB748		USGS		Geochemistry of rock samples from the National Geochemical Database: U.S. Geological Survey, Reston, VA.	U.S. Geological Survey	USGS		55.1903	-131.744	0.01				ES	SEDIMENTARY	UNKNOWN	UNKNOWN	BRECCIA																						20	300			10		700
BDB749		USGS		Geochemistry of rock samples from the National Geochemical Database: U.S. Geological Survey, Reston, VA.	U.S. Geological Survey	USGS		55.193	-131.719	0.01				AAS	SEDIMENTARY	UNKNOWN	UNKNOWN	BRECCIA
BDB749		USGS		Geochemistry of rock samples from the National Geochemical Database: U.S. Geological Survey, Reston, VA.	U.S. Geological Survey	USGS		55.193	-131.719	0.01				ES	SEDIMENTARY	UNKNOWN	UNKNOWN	BRECCIA																							200		10	500		1000
BDB758		USGS		Geochemistry of rock samples from the National Geochemical Database: U.S. Geological Survey, Reston, VA.	U.S. Geological Survey	USGS		55.2639	-131.831	0.01				AAS	SEDIMENTARY	UNKNOWN	UNKNOWN	BRECCIA
BDB758		USGS		Geochemistry of rock samples from the National Geochemical Database: U.S. Geological Survey, Reston, VA.	U.S. Geological Survey	USGS		55.2639	-131.831	0.01				ES	SEDIMENTARY	UNKNOWN	UNKNOWN	BRECCIA																						20	5000	20	150	20000				1.5
BDV064		USGS		Geochemistry of rock samples from the National Geochemical Database: U.S. Geological Survey, Reston, VA.	U.S. Geological Survey	USGS		63.443	-145.96	0.01	55	55	55	ES	SEDIMENTARY	UNKNOWN	UNKNOWN	BRECCIA																						5	1500	15		70
BDV065		USGS		Geochemistry of rock samples from the National Geochemical Database: U.S. Geological Survey, Reston, VA.	U.S. Geological Survey	USGS		63.443	-145.96	0.01	55	55	55	ES	SEDIMENTARY	UNKNOWN	UNKNOWN	BRECCIA																						1.5	150	15		30
BEL125		USGS		Geochemistry of rock samples from the National Geochemical Database: U.S. Geological Survey, Reston, VA.	U.S. Geological Survey	USGS		45.0514	-109.951	0.01	3	3	3	AAS	SEDIMENTARY	UNKNOWN	UNKNOWN	BRECCIA
BEL125		USGS		Geochemistry of rock samples from the National Geochemical Database: U.S. Geological Survey, Reston, VA.	U.S. Geological Survey	USGS		45.0514	-109.951	0.01	3	3	3	ES	SEDIMENTARY	UNKNOWN	UNKNOWN	BRECCIA																						15	5000	100	70	500				5
BFM557		USGS		Geochemistry of rock samples from the National Geochemical Database: U.S. Geological Survey, Reston, VA.	U.S. Geological Survey	USGS		44.2092	-114.592	0.01				AAS	SEDIMENTARY	UNKNOWN	UNKNOWN	BRECCIA																										290		700		0.6
BFM557		USGS		Geochemistry of rock samples from the National Geochemical Database: U.S. Geological Survey, Reston, VA.	U.S. Geological Survey	USGS		44.2092	-114.592	0.01				COL	SEDIMENTARY	UNKNOWN	UNKNOWN	BRECCIA
BFM557		USGS		Geochemistry of rock samples from the National Geochemical Database: U.S. Geological Survey, Reston, VA.	U.S. Geological Survey	USGS		44.2092	-114.592	0.01				ES	SEDIMENTARY	UNKNOWN	UNKNOWN	BRECCIA																						10	100	150	10	500		1500		0.7
BGR996		USGS		Geochemistry of rock samples from the National Geochemical Database: U.S. Geological Survey, Reston, VA.	U.S. Geological Survey	USGS		44.2425	-114.555	0.01				AAS	SEDIMENTARY	UNKNOWN	UNKNOWN	BRECCIA																										10		10
BGR996		USGS		Geochemistry of rock samples from the National Geochemical Database: U.S. Geological Survey, Reston, VA.	U.S. Geological Survey	USGS		44.2425	-114.555	0.01				COL	SEDIMENTARY	UNKNOWN	UNKNOWN	BRECCIA
BGR996		USGS		Geochemistry of rock samples from the National Geochemical Database: U.S. Geological Survey, Reston, VA.	U.S. Geological Survey	USGS		44.2425	-114.555	0.01				ES	SEDIMENTARY	UNKNOWN	UNKNOWN	BRECCIA																						2	20	5		5				0.5
BGR999		USGS		Geochemistry of rock samples from the National Geochemical Database: U.S. Geological Survey, Reston, VA.	U.S. Geological Survey	USGS		44.235	-114.558	0.01				AAS	SEDIMENTARY	UNKNOWN	UNKNOWN	BRECCIA																										130		700		1.5
BGR999		USGS		Geochemistry of rock samples from the National Geochemical Database: U.S. Geological Survey, Reston, VA.	U.S. Geological Survey	USGS		44.235	-114.558	0.01				COL	SEDIMENTARY	UNKNOWN	UNKNOWN	BRECCIA
BGR999		USGS		Geochemistry of rock samples from the National Geochemical Database: U.S. Geological Survey, Reston, VA.	U.S. Geological Survey	USGS		44.235	-114.558	0.01				ES	SEDIMENTARY	UNKNOWN	UNKNOWN	BRECCIA																						0.7	200	70		100		2000		2
BGS002		USGS		Geochemistry of rock samples from the National Geochemical Database: U.S. Geological Survey, Reston, VA.	U.S. Geological Survey	USGS		44.2258	-114.558	0.01				AAS	SEDIMENTARY	UNKNOWN	UNKNOWN	BRECCIA																										55		170		0.5
BGS002		USGS		Geochemistry of rock samples from the National Geochemical Database: U.S. Geological Survey, Reston, VA.	U.S. Geological Survey	USGS		44.2258	-114.558	0.01				COL	SEDIMENTARY	UNKNOWN	UNKNOWN	BRECCIA
BGS002		USGS		Geochemistry of rock samples from the National Geochemical Database: U.S. Geological Survey, Reston, VA.	U.S. Geological Survey	USGS		44.2258	-114.558	0.01				ES	SEDIMENTARY	UNKNOWN	UNKNOWN	BRECCIA																						5	50	30		50		500		0.5
BGS003		USGS		Geochemistry of rock samples from the National Geochemical Database: U.S. Geological Survey, Reston, VA.	U.S. Geological Survey	USGS		44.2239	-114.561	0.01				AAS	SEDIMENTARY	UNKNOWN	UNKNOWN	BRECCIA																										15		10
BGS003		USGS		Geochemistry of rock samples from the National Geochemical Database: U.S. Geological Survey, Reston, VA.	U.S. Geological Survey	USGS		44.2239	-114.561	0.01				COL	SEDIMENTARY	UNKNOWN	UNKNOWN	BRECCIA
BGS003		USGS		Geochemistry of rock samples from the National Geochemical Database: U.S. Geological Survey, Reston, VA.	U.S. Geological Survey	USGS		44.2239	-114.561	0.01				ES	SEDIMENTARY	UNKNOWN	UNKNOWN	BRECCIA																						2	20	5		20		500		0.7
BGS011		USGS		Geochemistry of rock samples from the National Geochemical Database: U.S. Geological Survey, Reston, VA.	U.S. Geological Survey	USGS		43.9442	-114.692	0.01				AAS	SEDIMENTARY	UNKNOWN	UNKNOWN	BRECCIA																										10		4500		6.5
BGS011		USGS		Geochemistry of rock samples from the National Geochemical Database: U.S. Geological Survey, Reston, VA.	U.S. Geological Survey	USGS		43.9442	-114.692	0.01				COL	SEDIMENTARY	UNKNOWN	UNKNOWN	BRECCIA
BGS011		USGS		Geochemistry of rock samples from the National Geochemical Database: U.S. Geological Survey, Reston, VA.	U.S. Geological Survey	USGS		43.9442	-114.692	0.01				ES	SEDIMENTARY	UNKNOWN	UNKNOWN	BRECCIA																						5	200	10		10		10000	500	5
BGS417		USGS		Geochemistry of rock samples from the National Geochemical Database: U.S. Geological Survey, Reston, VA.	U.S. Geological Survey	USGS		43.8364	-114.521	0.01	43	43	43	AAS	SEDIMENTARY	UNKNOWN	UNKNOWN	BRECCIA																										15		100
BGS417		USGS		Geochemistry of rock samples from the National Geochemical Database: U.S. Geological Survey, Reston, VA.	U.S. Geological Survey	USGS		43.8364	-114.521	0.01	43	43	43	ES	SEDIMENTARY	UNKNOWN	UNKNOWN	BRECCIA																						1.5	200	20	10	20				1
BGS837		USGS		Geochemistry of rock samples from the National Geochemical Database: U.S. Geological Survey, Reston, VA.	U.S. Geological Survey	USGS		44.9928	-114.664	0.01				AAS	SEDIMENTARY	UNKNOWN	UNKNOWN	BRECCIA																														2
BGS837		USGS		Geochemistry of rock samples from the National Geochemical Database: U.S. Geological Survey, Reston, VA.	U.S. Geological Survey	USGS		44.9928	-114.664	0.01				ES	SEDIMENTARY	UNKNOWN	UNKNOWN	BRECCIA																						0.2	500
BGS838		USGS		Geochemistry of rock samples from the National Geochemical Database: U.S. Geological Survey, Reston, VA.	U.S. Geological Survey	USGS		44.9922	-114.664	0.01				AAS	SEDIMENTARY	UNKNOWN	UNKNOWN	BRECCIA																												40
BGS838		USGS		Geochemistry of rock samples from the National Geochemical Database: U.S. Geological Survey, Reston, VA.	U.S. Geological Survey	USGS		44.9922	-114.664	0.01				COL	SEDIMENTARY	UNKNOWN	UNKNOWN	BRECCIA
BGS838		USGS		Geochemistry of rock samples from the National Geochemical Database: U.S. Geological Survey, Reston, VA.	U.S. Geological Survey	USGS		44.9922	-114.664	0.01				ES	SEDIMENTARY	UNKNOWN	UNKNOWN	BRECCIA																						0.2	150			10
BGS839		USGS		Geochemistry of rock samples from the National Geochemical Database: U.S. Geological Survey, Reston, VA.	U.S. Geological Survey	USGS		44.9892	-114.666	0.01				AAS	SEDIMENTARY	UNKNOWN	UNKNOWN	BRECCIA																												15
BGS839		USGS		Geochemistry of rock samples from the National Geochemical Database: U.S. Geological Survey, Reston, VA.	U.S. Geological Survey	USGS		44.9892	-114.666	0.01				ES	SEDIMENTARY	UNKNOWN	UNKNOWN	BRECCIA																						0.1	150			100
BGS900		USGS		Geochemistry of rock samples from the National Geochemical Database: U.S. Geological Survey, Reston, VA.	U.S. Geological Survey	USGS		44.2119	-114.603	0.01				AAS	SEDIMENTARY	UNKNOWN	UNKNOWN	BRECCIA																										40		120		4
BGS900		USGS		Geochemistry of rock samples from the National Geochemical Database: U.S. Geological Survey, Reston, VA.	U.S. Geological Survey	USGS		44.2119	-114.603	0.01				COL	SEDIMENTARY	UNKNOWN	UNKNOWN	BRECCIA
BGS900		USGS		Geochemistry of rock samples from the National Geochemical Database: U.S. Geological Survey, Reston, VA.	U.S. Geological Survey	USGS		44.2119	-114.603	0.01				ES	SEDIMENTARY	UNKNOWN	UNKNOWN	BRECCIA																						0.5	20	5		20				1.5
BGS901		USGS		Geochemistry of rock samples from the National Geochemical Database: U.S. Geological Survey, Reston, VA.	U.S. Geological Survey	USGS		44.1806	-114.565	0.01				AAS	SEDIMENTARY	UNKNOWN	UNKNOWN	BRECCIA																										120		360
BGS901		USGS		Geochemistry of rock samples from the National Geochemical Database: U.S. Geological Survey, Reston, VA.	U.S. Geological Survey	USGS		44.1806	-114.565	0.01				COL	SEDIMENTARY	UNKNOWN	UNKNOWN	BRECCIA
BGS901		USGS		Geochemistry of rock samples from the National Geochemical Database: U.S. Geological Survey, Reston, VA.	U.S. Geological Survey	USGS		44.1806	-114.565	0.01				ES	SEDIMENTARY	UNKNOWN	UNKNOWN	BRECCIA																						5	150	100	5	70		300
BGS902		USGS		Geochemistry of rock samples from the National Geochemical Database: U.S. Geological Survey, Reston, VA.	U.S. Geological Survey	USGS		44.1761	-114.567	0.01				AAS	SEDIMENTARY	UNKNOWN	UNKNOWN	BRECCIA																										85		190		1
BGS902		USGS		Geochemistry of rock samples from the National Geochemical Database: U.S. Geological Survey, Reston, VA.	U.S. Geological Survey	USGS		44.1761	-114.567	0.01				COL	SEDIMENTARY	UNKNOWN	UNKNOWN	BRECCIA
BGS902		USGS		Geochemistry of rock samples from the National Geochemical Database: U.S. Geological Survey, Reston, VA.	U.S. Geological Survey	USGS		44.1761	-114.567	0.01				ES	SEDIMENTARY	UNKNOWN	UNKNOWN	BRECCIA																						5	300	50	10	70		200		1
BGS903		USGS		Geochemistry of rock samples from the National Geochemical Database: U.S. Geological Survey, Reston, VA.	U.S. Geological Survey	USGS		43.9481	-114.725	0.01				AAS	SEDIMENTARY	UNKNOWN	UNKNOWN	BRECCIA																										25		40
BGS903		USGS		Geochemistry of rock samples from the National Geochemical Database: U.S. Geological Survey, Reston, VA.	U.S. Geological Survey	USGS		43.9481	-114.725	0.01				COL	SEDIMENTARY	UNKNOWN	UNKNOWN	BRECCIA
BGS903		USGS		Geochemistry of rock samples from the National Geochemical Database: U.S. Geological Survey, Reston, VA.	U.S. Geological Survey	USGS		43.9481	-114.725	0.01				ES	SEDIMENTARY	UNKNOWN	UNKNOWN	BRECCIA																						1.5	200	10
BGS909		USGS		Geochemistry of rock samples from the National Geochemical Database: U.S. Geological Survey, Reston, VA.	U.S. Geological Survey	USGS		44.0036	-114.715	0.01				AAS	SEDIMENTARY	UNKNOWN	UNKNOWN	BRECCIA																										5		25
BGS909		USGS		Geochemistry of rock samples from the National Geochemical Database: U.S. Geological Survey, Reston, VA.	U.S. Geological Survey	USGS		44.0036	-114.715	0.01				ES	SEDIMENTARY	UNKNOWN	UNKNOWN	BRECCIA																						0.3	300	10
BGW070		USGS		Geochemistry of rock samples from the National Geochemical Database: U.S. Geological Survey, Reston, VA.	U.S. Geological Survey	USGS		45.0444	-109.938	0.01	3	3	3	AAS	SEDIMENTARY	UNKNOWN	UNKNOWN	BRECCIA
BGW070		USGS		Geochemistry of rock samples from the National Geochemical Database: U.S. Geological Survey, Reston, VA.	U.S. Geological Survey	USGS		45.0444	-109.938	0.01	3	3	3	ES	SEDIMENTARY	UNKNOWN	UNKNOWN	BRECCIA																						10	5000	70	20	5000		700		50
BGW107		USGS		Geochemistry of rock samples from the National Geochemical Database: U.S. Geological Survey, Reston, VA.	U.S. Geological Survey	USGS		45.0694	-109.954	0.01	3	3	3	AAS	SEDIMENTARY	UNKNOWN	UNKNOWN	BRECCIA
BGW107		USGS		Geochemistry of rock samples from the National Geochemical Database: U.S. Geological Survey, Reston, VA.	U.S. Geological Survey	USGS		45.0694	-109.954	0.01	3	3	3	ES	SEDIMENTARY	UNKNOWN	UNKNOWN	BRECCIA																						5	500	30	7	1000				1
BGW116		USGS		Geochemistry of rock samples from the National Geochemical Database: U.S. Geological Survey, Reston, VA.	U.S. Geological Survey	USGS		45.0736	-109.946	0.01	3	3	3	AAS	SEDIMENTARY	UNKNOWN	UNKNOWN	BRECCIA
BGW116		USGS		Geochemistry of rock samples from the National Geochemical Database: U.S. Geological Survey, Reston, VA.	U.S. Geological Survey	USGS		45.0736	-109.946	0.01	3	3	3	ES	SEDIMENTARY	UNKNOWN	UNKNOWN	BRECCIA																						5	2000	50	30	300				1
BGW118		USGS		Geochemistry of rock samples from the National Geochemical Database: U.S. Geological Survey, Reston, VA.	U.S. Geological Survey	USGS		45.0736	-109.949	0.01	3	3	3	AAS	SEDIMENTARY	UNKNOWN	UNKNOWN	BRECCIA
BGW118		USGS		Geochemistry of rock samples from the National Geochemical Database: U.S. Geological Survey, Reston, VA.	U.S. Geological Survey	USGS		45.0736	-109.949	0.01	3	3	3	ES	SEDIMENTARY	UNKNOWN	UNKNOWN	BRECCIA																						5	2000	70	30	150				0.5
C101823		USGS		Geochemistry of rock samples from the National Geochemical Database: U.S. Geological Survey, Reston, VA.	U.S. Geological Survey	USGS		38.8875	-107.05	0.01	3	3	3	MISC	SEDIMENTARY	UNKNOWN	UNKNOWN	BRECCIA																	2.6
C101823		USGS		Geochemistry of rock samples from the National Geochemical Database: U.S. Geological Survey, Reston, VA.	U.S. Geological Survey	USGS		38.8875	-107.05	0.01	3	3	3	XRF	SEDIMENTARY	UNKNOWN	UNKNOWN	BRECCIA		71.9	0.25	12.3						1.47	0.65	3.49		3.15	0.07
C101901		USGS		Geochemistry of rock samples from the National Geochemical Database: U.S. Geological Survey, Reston, VA.	U.S. Geological Survey	USGS		61.5792	-157.276	0.01				AAS	SEDIMENTARY	UNKNOWN	UNKNOWN	BRECCIA
C101901		USGS		Geochemistry of rock samples from the National Geochemical Database: U.S. Geological Survey, Reston, VA.	U.S. Geological Survey	USGS		61.5792	-157.276	0.01				COL	SEDIMENTARY	UNKNOWN	UNKNOWN	BRECCIA
C101901		USGS		Geochemistry of rock samples from the National Geochemical Database: U.S. Geological Survey, Reston, VA.	U.S. Geological Survey	USGS		61.5792	-157.276	0.01				FAP	SEDIMENTARY	UNKNOWN	UNKNOWN	BRECCIA
C101901		USGS		Geochemistry of rock samples from the National Geochemical Database: U.S. Geological Survey, Reston, VA.	U.S. Geological Survey	USGS		61.5792	-157.276	0.01				ICPAES	SEDIMENTARY	UNKNOWN	UNKNOWN	BRECCIA																						8.4	137	69	5	82.2	1.3	56.9	1570	1.9
C101905		USGS		Geochemistry of rock samples from the National Geochemical Database: U.S. Geological Survey, Reston, VA.	U.S. Geological Survey	USGS		61.5792	-157.276	0.01				AAS	SEDIMENTARY	UNKNOWN	UNKNOWN	BRECCIA
C101905		USGS		Geochemistry of rock samples from the National Geochemical Database: U.S. Geological Survey, Reston, VA.	U.S. Geological Survey	USGS		61.5792	-157.276	0.01				COL	SEDIMENTARY	UNKNOWN	UNKNOWN	BRECCIA
C101905		USGS		Geochemistry of rock samples from the National Geochemical Database: U.S. Geological Survey, Reston, VA.	U.S. Geological Survey	USGS		61.5792	-157.276	0.01				FAP	SEDIMENTARY	UNKNOWN	UNKNOWN	BRECCIA
C101905		USGS		Geochemistry of rock samples from the National Geochemical Database: U.S. Geological Survey, Reston, VA.	U.S. Geological Survey	USGS		61.5792	-157.276	0.01				ICPAES	SEDIMENTARY	UNKNOWN	UNKNOWN	BRECCIA																						12	173	48	2	96.2	0.2	70.3	289	0.2
C101907		USGS		Geochemistry of rock samples from the National Geochemical Database: U.S. Geological Survey, Reston, VA.	U.S. Geological Survey	USGS		61.5786	-157.279	0.01				AAS	SEDIMENTARY	UNKNOWN	UNKNOWN	BRECCIA
C101907		USGS		Geochemistry of rock samples from the National Geochemical Database: U.S. Geological Survey, Reston, VA.	U.S. Geological Survey	USGS		61.5786	-157.279	0.01				COL	SEDIMENTARY	UNKNOWN	UNKNOWN	BRECCIA
C101907		USGS		Geochemistry of rock samples from the National Geochemical Database: U.S. Geological Survey, Reston, VA.	U.S. Geological Survey	USGS		61.5786	-157.279	0.01				FAP	SEDIMENTARY	UNKNOWN	UNKNOWN	BRECCIA
C101907		USGS		Geochemistry of rock samples from the National Geochemical Database: U.S. Geological Survey, Reston, VA.	U.S. Geological Survey	USGS		61.5786	-157.279	0.01				ICPAES	SEDIMENTARY	UNKNOWN	UNKNOWN	BRECCIA																						8.2	120	47	2	321	4	130	2250	2.1
C101909		USGS		Geochemistry of rock samples from the National Geochemical Database: U.S. Geological Survey, Reston, VA.	U.S. Geological Survey	USGS		61.5778	-157.283	0.01				AAS	SEDIMENTARY	UNKNOWN	UNKNOWN	BRECCIA
C101909		USGS		Geochemistry of rock samples from the National Geochemical Database: U.S. Geological Survey, Reston, VA.	U.S. Geological Survey	USGS		61.5778	-157.283	0.01				COL	SEDIMENTARY	UNKNOWN	UNKNOWN	BRECCIA
C101909		USGS		Geochemistry of rock samples from the National Geochemical Database: U.S. Geological Survey, Reston, VA.	U.S. Geological Survey	USGS		61.5778	-157.283	0.01				FAP	SEDIMENTARY	UNKNOWN	UNKNOWN	BRECCIA
C101909		USGS		Geochemistry of rock samples from the National Geochemical Database: U.S. Geological Survey, Reston, VA.	U.S. Geological Survey	USGS		61.5778	-157.283	0.01				ICPAES	SEDIMENTARY	UNKNOWN	UNKNOWN	BRECCIA																						6.1	728	63	8	66.5	0.05	50.7	121	0.2
C101912		USGS		Geochemistry of rock samples from the National Geochemical Database: U.S. Geological Survey, Reston, VA.	U.S. Geological Survey	USGS		61.5744	-157.283	0.01				AAS	SEDIMENTARY	UNKNOWN	UNKNOWN	BRECCIA
C101912		USGS		Geochemistry of rock samples from the National Geochemical Database: U.S. Geological Survey, Reston, VA.	U.S. Geological Survey	USGS		61.5744	-157.283	0.01				COL	SEDIMENTARY	UNKNOWN	UNKNOWN	BRECCIA
C101912		USGS		Geochemistry of rock samples from the National Geochemical Database: U.S. Geological Survey, Reston, VA.	U.S. Geological Survey	USGS		61.5744	-157.283	0.01				FAP	SEDIMENTARY	UNKNOWN	UNKNOWN	BRECCIA
C101912		USGS		Geochemistry of rock samples from the National Geochemical Database: U.S. Geological Survey, Reston, VA.	U.S. Geological Survey	USGS		61.5744	-157.283	0.01				ICPAES	SEDIMENTARY	UNKNOWN	UNKNOWN	BRECCIA																						10	189	47	6	59.7	0.6	166	221
C101913		USGS		Geochemistry of rock samples from the National Geochemical Database: U.S. Geological Survey, Reston, VA.	U.S. Geological Survey	USGS		61.5814	-157.283	0.01				AAS	SEDIMENTARY	UNKNOWN	UNKNOWN	BRECCIA
C101913		USGS		Geochemistry of rock samples from the National Geochemical Database: U.S. Geological Survey, Reston, VA.	U.S. Geological Survey	USGS		61.5814	-157.283	0.01				COL	SEDIMENTARY	UNKNOWN	UNKNOWN	BRECCIA
C101913		USGS		Geochemistry of rock samples from the National Geochemical Database: U.S. Geological Survey, Reston, VA.	U.S. Geological Survey	USGS		61.5814	-157.283	0.01				FAP	SEDIMENTARY	UNKNOWN	UNKNOWN	BRECCIA
C101913		USGS		Geochemistry of rock samples from the National Geochemical Database: U.S. Geological Survey, Reston, VA.	U.S. Geological Survey	USGS		61.5814	-157.283	0.01				ICPAES	SEDIMENTARY	UNKNOWN	UNKNOWN	BRECCIA																						18	426	78	3	36.4	0.8	155	540
C102026		USGS		Geochemistry of rock samples from the National Geochemical Database: U.S. Geological Survey, Reston, VA.	U.S. Geological Survey	USGS		61.5483	-158.156	0.01				AAS	SEDIMENTARY	UNKNOWN	UNKNOWN	BRECCIA
C102026		USGS		Geochemistry of rock samples from the National Geochemical Database: U.S. Geological Survey, Reston, VA.	U.S. Geological Survey	USGS		61.5483	-158.156	0.01				COL	SEDIMENTARY	UNKNOWN	UNKNOWN	BRECCIA
C102026		USGS		Geochemistry of rock samples from the National Geochemical Database: U.S. Geological Survey, Reston, VA.	U.S. Geological Survey	USGS		61.5483	-158.156	0.01				ICPAES	SEDIMENTARY	UNKNOWN	UNKNOWN	BRECCIA																						2.9	506	53	9	24.5	0.1	55.3	6.1	0.1
C120414		USGS		Geochemistry of rock samples from the National Geochemical Database: U.S. Geological Survey, Reston, VA.	U.S. Geological Survey	USGS		42.7139	-111.837	0.01	71	71	71	ICPAES	SEDIMENTARY	UNKNOWN	UNKNOWN	BRECCIA																						0.31	26	4		3		9
C122504		USGS		Geochemistry of rock samples from the National Geochemical Database: U.S. Geological Survey, Reston, VA.	U.S. Geological Survey	USGS		61.6272	-158.202	0.01				AAS	SEDIMENTARY	UNKNOWN	UNKNOWN	BRECCIA
C122504		USGS		Geochemistry of rock samples from the National Geochemical Database: U.S. Geological Survey, Reston, VA.	U.S. Geological Survey	USGS		61.6272	-158.202	0.01				ICPAES	SEDIMENTARY	UNKNOWN	UNKNOWN	BRECCIA																						3.42	1780	34	8	5	0.12	61.9	10
C122504		USGS		Geochemistry of rock samples from the National Geochemical Database: U.S. Geological Survey, Reston, VA.	U.S. Geological Survey	USGS		61.6272	-158.202	0.01				NAA	SEDIMENTARY	UNKNOWN	UNKNOWN	BRECCIA
C122505		USGS		Geochemistry of rock samples from the National Geochemical Database: U.S. Geological Survey, Reston, VA.	U.S. Geological Survey	USGS		61.6297	-158.702	0.01				AAS	SEDIMENTARY	UNKNOWN	UNKNOWN	BRECCIA
C122505		USGS		Geochemistry of rock samples from the National Geochemical Database: U.S. Geological Survey, Reston, VA.	U.S. Geological Survey	USGS		61.6297	-158.702	0.01				FAP	SEDIMENTARY	UNKNOWN	UNKNOWN	BRECCIA
C122505		USGS		Geochemistry of rock samples from the National Geochemical Database: U.S. Geological Survey, Reston, VA.	U.S. Geological Survey	USGS		61.6297	-158.702	0.01				ICPAES	SEDIMENTARY	UNKNOWN	UNKNOWN	BRECCIA																						3.08	1170	37	7	13.5	0.25	62.5	6
C122505		USGS		Geochemistry of rock samples from the National Geochemical Database: U.S. Geological Survey, Reston, VA.	U.S. Geological Survey	USGS		61.6297	-158.702	0.01				NAA	SEDIMENTARY	UNKNOWN	UNKNOWN	BRECCIA
C122610		USGS		Geochemistry of rock samples from the National Geochemical Database: U.S. Geological Survey, Reston, VA.	U.S. Geological Survey	USGS		61.9592	-157.175	0.01				AAS	SEDIMENTARY	UNKNOWN	UNKNOWN	BRECCIA
C122610		USGS		Geochemistry of rock samples from the National Geochemical Database: U.S. Geological Survey, Reston, VA.	U.S. Geological Survey	USGS		61.9592	-157.175	0.01				FAP	SEDIMENTARY	UNKNOWN	UNKNOWN	BRECCIA
C122610		USGS		Geochemistry of rock samples from the National Geochemical Database: U.S. Geological Survey, Reston, VA.	U.S. Geological Survey	USGS		61.9592	-157.175	0.01				ICPAES	SEDIMENTARY	UNKNOWN	UNKNOWN	BRECCIA																						1.97	72	26	3	12.5	0.06	55.3	26
C122610		USGS		Geochemistry of rock samples from the National Geochemical Database: U.S. Geological Survey, Reston, VA.	U.S. Geological Survey	USGS		61.9592	-157.175	0.01				NAA	SEDIMENTARY	UNKNOWN	UNKNOWN	BRECCIA
C122792		USGS		Geochemistry of rock samples from the National Geochemical Database: U.S. Geological Survey, Reston, VA.	U.S. Geological Survey	USGS		61.9078	-157.753	0.01				AAS	SEDIMENTARY	UNKNOWN	UNKNOWN	BRECCIA
C122792		USGS		Geochemistry of rock samples from the National Geochemical Database: U.S. Geological Survey, Reston, VA.	U.S. Geological Survey	USGS		61.9078	-157.753	0.01				FAP	SEDIMENTARY	UNKNOWN	UNKNOWN	BRECCIA
C122792		USGS		Geochemistry of rock samples from the National Geochemical Database: U.S. Geological Survey, Reston, VA.	U.S. Geological Survey	USGS		61.9078	-157.753	0.01				ICPAES	SEDIMENTARY	UNKNOWN	UNKNOWN	BRECCIA																						3.99	453	55	8	19	0.22	89.8	34
C122792		USGS		Geochemistry of rock samples from the National Geochemical Database: U.S. Geological Survey, Reston, VA.	U.S. Geological Survey	USGS		61.9078	-157.753	0.01				NAA	SEDIMENTARY	UNKNOWN	UNKNOWN	BRECCIA
C194630		USGS		Geochemistry of rock samples from the National Geochemical Database: U.S. Geological Survey, Reston, VA.	U.S. Geological Survey	USGS		44.0031	-114.661	0.01				AAS	SEDIMENTARY	UNKNOWN	UNKNOWN	BRECCIA																													621
C194630		USGS		Geochemistry of rock samples from the National Geochemical Database: U.S. Geological Survey, Reston, VA.	U.S. Geological Survey	USGS		44.0031	-114.661	0.01				FAP	SEDIMENTARY	UNKNOWN	UNKNOWN	BRECCIA
C194630		USGS		Geochemistry of rock samples from the National Geochemical Database: U.S. Geological Survey, Reston, VA.	U.S. Geological Survey	USGS		44.0031	-114.661	0.01				ICPAES	SEDIMENTARY	UNKNOWN	UNKNOWN	BRECCIA																						17.4	112	7	25	112	10	1010	682	9
C194630		USGS		Geochemistry of rock samples from the National Geochemical Database: U.S. Geological Survey, Reston, VA.	U.S. Geological Survey	USGS		44.0031	-114.661	0.01				TITR	SEDIMENTARY	UNKNOWN	UNKNOWN	BRECCIA
C194631		USGS		Geochemistry of rock samples from the National Geochemical Database: U.S. Geological Survey, Reston, VA.	U.S. Geological Survey	USGS		44.0033	-114.661	0.01				AAS	SEDIMENTARY	UNKNOWN	UNKNOWN	BRECCIA																													13570
C194631		USGS		Geochemistry of rock samples from the National Geochemical Database: U.S. Geological Survey, Reston, VA.	U.S. Geological Survey	USGS		44.0033	-114.661	0.01				FAP	SEDIMENTARY	UNKNOWN	UNKNOWN	BRECCIA
C194631		USGS		Geochemistry of rock samples from the National Geochemical Database: U.S. Geological Survey, Reston, VA.	U.S. Geological Survey	USGS		44.0033	-114.661	0.01				ICPAES	SEDIMENTARY	UNKNOWN	UNKNOWN	BRECCIA																						9.94	47		17	81		90	14800	1330
C194632		USGS		Geochemistry of rock samples from the National Geochemical Database: U.S. Geological Survey, Reston, VA.	U.S. Geological Survey	USGS		44.0058	-114.655	0.01				AAS	SEDIMENTARY	UNKNOWN	UNKNOWN	BRECCIA																													70
C194632		USGS		Geochemistry of rock samples from the National Geochemical Database: U.S. Geological Survey, Reston, VA.	U.S. Geological Survey	USGS		44.0058	-114.655	0.01				FAP	SEDIMENTARY	UNKNOWN	UNKNOWN	BRECCIA
C194632		USGS		Geochemistry of rock samples from the National Geochemical Database: U.S. Geological Survey, Reston, VA.	U.S. Geological Survey	USGS		44.0058	-114.655	0.01				ICPAES	SEDIMENTARY	UNKNOWN	UNKNOWN	BRECCIA																						31.3	201	42	33	407	698	57520	54	122
C194632		USGS		Geochemistry of rock samples from the National Geochemical Database: U.S. Geological Survey, Reston, VA.	U.S. Geological Survey	USGS		44.0058	-114.655	0.01				TITR	SEDIMENTARY	UNKNOWN	UNKNOWN	BRECCIA
C194633		USGS		Geochemistry of rock samples from the National Geochemical Database: U.S. Geological Survey, Reston, VA.	U.S. Geological Survey	USGS		44.0058	-114.655	0.01				AAS	SEDIMENTARY	UNKNOWN	UNKNOWN	BRECCIA																													7.7
C194633		USGS		Geochemistry of rock samples from the National Geochemical Database: U.S. Geological Survey, Reston, VA.	U.S. Geological Survey	USGS		44.0058	-114.655	0.01				FAP	SEDIMENTARY	UNKNOWN	UNKNOWN	BRECCIA
C194633		USGS		Geochemistry of rock samples from the National Geochemical Database: U.S. Geological Survey, Reston, VA.	U.S. Geological Survey	USGS		44.0058	-114.655	0.01				ICPAES	SEDIMENTARY	UNKNOWN	UNKNOWN	BRECCIA																						0.55	24			66		162	16	19
C194633		USGS		Geochemistry of rock samples from the National Geochemical Database: U.S. Geological Survey, Reston, VA.	U.S. Geological Survey	USGS		44.0058	-114.655	0.01				TITR	SEDIMENTARY	UNKNOWN	UNKNOWN	BRECCIA
C194634		USGS		Geochemistry of rock samples from the National Geochemical Database: U.S. Geological Survey, Reston, VA.	U.S. Geological Survey	USGS		44.0059	-114.653	0.01				AAS	SEDIMENTARY	UNKNOWN	UNKNOWN	BRECCIA																													28.7
C194634		USGS		Geochemistry of rock samples from the National Geochemical Database: U.S. Geological Survey, Reston, VA.	U.S. Geological Survey	USGS		44.0059	-114.653	0.01				FAP	SEDIMENTARY	UNKNOWN	UNKNOWN	BRECCIA
C194634		USGS		Geochemistry of rock samples from the National Geochemical Database: U.S. Geological Survey, Reston, VA.	U.S. Geological Survey	USGS		44.0059	-114.653	0.01				ICPAES	SEDIMENTARY	UNKNOWN	UNKNOWN	BRECCIA																						5.5	98		4	40	105	7130	51	58
C194635		USGS		Geochemistry of rock samples from the National Geochemical Database: U.S. Geological Survey, Reston, VA.	U.S. Geological Survey	USGS		44.0011	-114.658	0.01				AAS	SEDIMENTARY	UNKNOWN	UNKNOWN	BRECCIA																													1650
C194635		USGS		Geochemistry of rock samples from the National Geochemical Database: U.S. Geological Survey, Reston, VA.	U.S. Geological Survey	USGS		44.0011	-114.658	0.01				FAP	SEDIMENTARY	UNKNOWN	UNKNOWN	BRECCIA
C194635		USGS		Geochemistry of rock samples from the National Geochemical Database: U.S. Geological Survey, Reston, VA.	U.S. Geological Survey	USGS		44.0011	-114.658	0.01				ICPAES	SEDIMENTARY	UNKNOWN	UNKNOWN	BRECCIA																						16.1	407	39	11	184	1110	113300	1500	29
C194635		USGS		Geochemistry of rock samples from the National Geochemical Database: U.S. Geological Survey, Reston, VA.	U.S. Geological Survey	USGS		44.0011	-114.658	0.01				TITR	SEDIMENTARY	UNKNOWN	UNKNOWN	BRECCIA
C198786		USGS		Geochemistry of rock samples from the National Geochemical Database: U.S. Geological Survey, Reston, VA.	U.S. Geological Survey	USGS		44.5612	-110.303	0.01				MS	SEDIMENTARY	UNKNOWN	UNKNOWN	BRECCIA																					32	0.873	226	8.52	4.88	6.3	0.028	16	77.5	0.61
CAK028		USGS		Geochemistry of rock samples from the National Geochemical Database: U.S. Geological Survey, Reston, VA.	U.S. Geological Survey	USGS		61.7078	-141.654	0.01				ES	SEDIMENTARY	UNKNOWN	UNKNOWN	BRECCIA																						3	1000	10	5	50				0.5
CAK058		USGS		Geochemistry of rock samples from the National Geochemical Database: U.S. Geological Survey, Reston, VA.	U.S. Geological Survey	USGS		61.1639	-141.622	0.01				ES	SEDIMENTARY	UNKNOWN	UNKNOWN	BRECCIA																						7	1000	100	100	700				0.5
CAP056		USGS		Geochemistry of rock samples from the National Geochemical Database: U.S. Geological Survey, Reston, VA.	U.S. Geological Survey	USGS		63.2356	-143.776	0.01				AAS	SEDIMENTARY	UNKNOWN	UNKNOWN	BRECCIA
CAP056		USGS		Geochemistry of rock samples from the National Geochemical Database: U.S. Geological Survey, Reston, VA.	U.S. Geological Survey	USGS		63.2356	-143.776	0.01				ES	SEDIMENTARY	UNKNOWN	UNKNOWN	BRECCIA																						1	700
CAS099		USGS		Geochemistry of rock samples from the National Geochemical Database: U.S. Geological Survey, Reston, VA.	U.S. Geological Survey	USGS		55.9839	-132.186	0.01				AAS	SEDIMENTARY	UNKNOWN	UNKNOWN	BRECCIA																												30
CAS099		USGS		Geochemistry of rock samples from the National Geochemical Database: U.S. Geological Survey, Reston, VA.	U.S. Geological Survey	USGS		55.9839	-132.186	0.01				ES	SEDIMENTARY	UNKNOWN	UNKNOWN	BRECCIA																								10	10	30				0.5
CAS099A		USGS		Geochemistry of rock samples from the National Geochemical Database: U.S. Geological Survey, Reston, VA.	U.S. Geological Survey	USGS		55.9839	-132.186	0.01				ES	SEDIMENTARY	UNKNOWN	UNKNOWN	BRECCIA
CBJ491		USGS		Geochemistry of rock samples from the National Geochemical Database: U.S. Geological Survey, Reston, VA.	U.S. Geological Survey	USGS		64.7208	-144.031	0.01				ES	SEDIMENTARY	UNKNOWN	UNKNOWN	BRECCIA																								5		5
CBJ808		USGS		Geochemistry of rock samples from the National Geochemical Database: U.S. Geological Survey, Reston, VA.	U.S. Geological Survey	USGS		62.705	-151.806	0.01				ES	SEDIMENTARY	UNKNOWN	UNKNOWN	BRECCIA																						5	1000	70	10	10
CBJ809		USGS		Geochemistry of rock samples from the National Geochemical Database: U.S. Geological Survey, Reston, VA.	U.S. Geological Survey	USGS		62.705	-151.806	0.01				ES	SEDIMENTARY	UNKNOWN	UNKNOWN	BRECCIA																						20	3000	150	70	70
CBJ811		USGS		Geochemistry of rock samples from the National Geochemical Database: U.S. Geological Survey, Reston, VA.	U.S. Geological Survey	USGS		62.705	-151.806	0.01				ES	SEDIMENTARY	UNKNOWN	UNKNOWN	BRECCIA																						15	2000		150	70
CBN477		USGS		Geochemistry of rock samples from the National Geochemical Database: U.S. Geological Survey, Reston, VA.	U.S. Geological Survey	USGS		62.9439	-149.993	0.01				ES	SEDIMENTARY	UNKNOWN	UNKNOWN	BRECCIA																						1.5	1500	50	5	70
CCG680		USGS		Geochemistry of rock samples from the National Geochemical Database: U.S. Geological Survey, Reston, VA.	U.S. Geological Survey	USGS		65.0803	-144.582	0.01				ES	SEDIMENTARY	UNKNOWN	UNKNOWN	BRECCIA																						5	1500
CCG696		USGS		Geochemistry of rock samples from the National Geochemical Database: U.S. Geological Survey, Reston, VA.	U.S. Geological Survey	USGS		65.1736	-146.021	0.01				ES	SEDIMENTARY	UNKNOWN	UNKNOWN	BRECCIA																						2	200	20		20
CCG697		USGS		Geochemistry of rock samples from the National Geochemical Database: U.S. Geological Survey, Reston, VA.	U.S. Geological Survey	USGS		65.14	-145.247	0.01				ES	SEDIMENTARY	UNKNOWN	UNKNOWN	BRECCIA																						5	20			10
CCG721		USGS		Geochemistry of rock samples from the National Geochemical Database: U.S. Geological Survey, Reston, VA.	U.S. Geological Survey	USGS		65.0106	-144.792	0.01				AAS	SEDIMENTARY	UNKNOWN	UNKNOWN	BRECCIA
CCG721		USGS		Geochemistry of rock samples from the National Geochemical Database: U.S. Geological Survey, Reston, VA.	U.S. Geological Survey	USGS		65.0106	-144.792	0.01				ES	SEDIMENTARY	UNKNOWN	UNKNOWN	BRECCIA																						1
CCG880		USGS		Geochemistry of rock samples from the National Geochemical Database: U.S. Geological Survey, Reston, VA.	U.S. Geological Survey	USGS		65.1117	-145.142	0.01				ES	SEDIMENTARY	UNKNOWN	UNKNOWN	BRECCIA																						2	20			15
CCG884		USGS		Geochemistry of rock samples from the National Geochemical Database: U.S. Geological Survey, Reston, VA.	U.S. Geological Survey	USGS		65.1083	-145.378	0.01				ES	SEDIMENTARY	UNKNOWN	UNKNOWN	BRECCIA																						5	500	50		30
CCG885		USGS		Geochemistry of rock samples from the National Geochemical Database: U.S. Geological Survey, Reston, VA.	U.S. Geological Survey	USGS		65.1239	-145.388	0.01				ES	SEDIMENTARY	UNKNOWN	UNKNOWN	BRECCIA																						2	20			20
CCG886		USGS		Geochemistry of rock samples from the National Geochemical Database: U.S. Geological Survey, Reston, VA.	U.S. Geological Survey	USGS		65.1078	-145.178	0.01				ES	SEDIMENTARY	UNKNOWN	UNKNOWN	BRECCIA																						1.5	20
CCG890		USGS		Geochemistry of rock samples from the National Geochemical Database: U.S. Geological Survey, Reston, VA.	U.S. Geological Survey	USGS		65.205	-145.936	0.01				ES	SEDIMENTARY	UNKNOWN	UNKNOWN	BRECCIA																						5	70	10		10
CCG892		USGS		Geochemistry of rock samples from the National Geochemical Database: U.S. Geological Survey, Reston, VA.	U.S. Geological Survey	USGS		65.0769	-145.364	0.01				ES	SEDIMENTARY	UNKNOWN	UNKNOWN	BRECCIA																						5	500	50	20	10
CCS215		USGS		Geochemistry of rock samples from the National Geochemical Database: U.S. Geological Survey, Reston, VA.	U.S. Geological Survey	USGS		63.2292	-154.781	0.01	65	65	65	AAS	SEDIMENTARY	UNKNOWN	UNKNOWN	BRECCIA																										30		140
CCS215		USGS		Geochemistry of rock samples from the National Geochemical Database: U.S. Geological Survey, Reston, VA.	U.S. Geological Survey	USGS		63.2292	-154.781	0.01	65	65	65	COL	SEDIMENTARY	UNKNOWN	UNKNOWN	BRECCIA																													160
CCS215		USGS		Geochemistry of rock samples from the National Geochemical Database: U.S. Geological Survey, Reston, VA.	U.S. Geological Survey	USGS		63.2292	-154.781	0.01	65	65	65	ES	SEDIMENTARY	UNKNOWN	UNKNOWN	BRECCIA																						10	300	100	10	100		300	500
CCS218		USGS		Geochemistry of rock samples from the National Geochemical Database: U.S. Geological Survey, Reston, VA.	U.S. Geological Survey	USGS		63.2264	-154.771	0.01	65	65	65	AAS	SEDIMENTARY	UNKNOWN	UNKNOWN	BRECCIA																										90		200
CCS218		USGS		Geochemistry of rock samples from the National Geochemical Database: U.S. Geological Survey, Reston, VA.	U.S. Geological Survey	USGS		63.2264	-154.771	0.01	65	65	65	COL	SEDIMENTARY	UNKNOWN	UNKNOWN	BRECCIA																													80
CCS218		USGS		Geochemistry of rock samples from the National Geochemical Database: U.S. Geological Survey, Reston, VA.	U.S. Geological Survey	USGS		63.2264	-154.771	0.01	65	65	65	ES	SEDIMENTARY	UNKNOWN	UNKNOWN	BRECCIA																						7		300	100	150		700	200
CCS385		USGS		Geochemistry of rock samples from the National Geochemical Database: U.S. Geological Survey, Reston, VA.	U.S. Geological Survey	USGS		63.1847	-155.983	0.01	3	3	3	AAS	SEDIMENTARY	UNKNOWN	UNKNOWN	BRECCIA																										20		150
CCS385		USGS		Geochemistry of rock samples from the National Geochemical Database: U.S. Geological Survey, Reston, VA.	U.S. Geological Survey	USGS		63.1847	-155.983	0.01	3	3	3	ES	SEDIMENTARY	UNKNOWN	UNKNOWN	BRECCIA																						1.5	200	10		10		200
CCZ381		USGS		Geochemistry of rock samples from the National Geochemical Database: U.S. Geological Survey, Reston, VA.	U.S. Geological Survey	USGS		56.0928	-132.557	0.01	65	65	65	AAS	SEDIMENTARY	UNKNOWN	UNKNOWN	BRECCIA																										60		30
CCZ381		USGS		Geochemistry of rock samples from the National Geochemical Database: U.S. Geological Survey, Reston, VA.	U.S. Geological Survey	USGS		56.0928	-132.557	0.01	65	65	65	ES	SEDIMENTARY	UNKNOWN	UNKNOWN	BRECCIA																						15	2000	30	50	100
CDE530		USGS		Geochemistry of rock samples from the National Geochemical Database: U.S. Geological Survey, Reston, VA.	U.S. Geological Survey	USGS		56.2286	-133.916	0.01				AAS	SEDIMENTARY	UNKNOWN	UNKNOWN	BRECCIA																										80		70
CDE530		USGS		Geochemistry of rock samples from the National Geochemical Database: U.S. Geological Survey, Reston, VA.	U.S. Geological Survey	USGS		56.2286	-133.916	0.01				ES	SEDIMENTARY	UNKNOWN	UNKNOWN	BRECCIA																						5	1500	20	20	100
CDE531		USGS		Geochemistry of rock samples from the National Geochemical Database: U.S. Geological Survey, Reston, VA.	U.S. Geological Survey	USGS		56.2411	-133.909	0.01				AAS	SEDIMENTARY	UNKNOWN	UNKNOWN	BRECCIA																										65		70
CDE531		USGS		Geochemistry of rock samples from the National Geochemical Database: U.S. Geological Survey, Reston, VA.	U.S. Geological Survey	USGS		56.2411	-133.909	0.01				ES	SEDIMENTARY	UNKNOWN	UNKNOWN	BRECCIA																						7	1500	20	30	100
CDE532		USGS		Geochemistry of rock samples from the National Geochemical Database: U.S. Geological Survey, Reston, VA.	U.S. Geological Survey	USGS		56.2555	-133.937	0.01				AAS	SEDIMENTARY	UNKNOWN	UNKNOWN	BRECCIA																										55		75
CDE532		USGS		Geochemistry of rock samples from the National Geochemical Database: U.S. Geological Survey, Reston, VA.	U.S. Geological Survey	USGS		56.2555	-133.937	0.01				ES	SEDIMENTARY	UNKNOWN	UNKNOWN	BRECCIA																						10	2000	30	50	100
CDE535		USGS		Geochemistry of rock samples from the National Geochemical Database: U.S. Geological Survey, Reston, VA.	U.S. Geological Survey	USGS		56.2555	-133.937	0.01				AAS	SEDIMENTARY	UNKNOWN	UNKNOWN	BRECCIA																										40		80
CDE535		USGS		Geochemistry of rock samples from the National Geochemical Database: U.S. Geological Survey, Reston, VA.	U.S. Geological Survey	USGS		56.2555	-133.937	0.01				ES	SEDIMENTARY	UNKNOWN	UNKNOWN	BRECCIA																						7	1500	15	30	70
CDE541		USGS		Geochemistry of rock samples from the National Geochemical Database: U.S. Geological Survey, Reston, VA.	U.S. Geological Survey	USGS		56.2575	-134.019	0.01				AAS	SEDIMENTARY	UNKNOWN	UNKNOWN	BRECCIA																										45		85
CDE541		USGS		Geochemistry of rock samples from the National Geochemical Database: U.S. Geological Survey, Reston, VA.	U.S. Geological Survey	USGS		56.2575	-134.019	0.01				ES	SEDIMENTARY	UNKNOWN	UNKNOWN	BRECCIA																						7	1500	30	20	100
CDF532		USGS		Geochemistry of rock samples from the National Geochemical Database: U.S. Geological Survey, Reston, VA.	U.S. Geological Survey	USGS		65.1022	-144.753	0.01				ES	SEDIMENTARY	UNKNOWN	UNKNOWN	BRECCIA																						1.5	100	10		10
CDG228		USGS		Geochemistry of rock samples from the National Geochemical Database: U.S. Geological Survey, Reston, VA.	U.S. Geological Survey	USGS		42.2264	-122.906	0.01	44	44	44	AAS	SEDIMENTARY	UNKNOWN	UNKNOWN	BRECCIA
CDG228		USGS		Geochemistry of rock samples from the National Geochemical Database: U.S. Geological Survey, Reston, VA.	U.S. Geological Survey	USGS		42.2264	-122.906	0.01	44	44	44	ES	SEDIMENTARY	UNKNOWN	UNKNOWN	BRECCIA																							1000	30	30	150
CDG230		USGS		Geochemistry of rock samples from the National Geochemical Database: U.S. Geological Survey, Reston, VA.	U.S. Geological Survey	USGS		42.2222	-122.9	0.01	44	44	44	AAS	SEDIMENTARY	UNKNOWN	UNKNOWN	BRECCIA
CDG230		USGS		Geochemistry of rock samples from the National Geochemical Database: U.S. Geological Survey, Reston, VA.	U.S. Geological Survey	USGS		42.2222	-122.9	0.01	44	44	44	ES	SEDIMENTARY	UNKNOWN	UNKNOWN	BRECCIA																							1500
CDH166		USGS		Geochemistry of rock samples from the National Geochemical Database: U.S. Geological Survey, Reston, VA.	U.S. Geological Survey	USGS		63.0069	-145.147	0.01				AAS	SEDIMENTARY	UNKNOWN	UNKNOWN	BRECCIA																										35		100
CDH166		USGS		Geochemistry of rock samples from the National Geochemical Database: U.S. Geological Survey, Reston, VA.	U.S. Geological Survey	USGS		63.0069	-145.147	0.01				ES	SEDIMENTARY	UNKNOWN	UNKNOWN	BRECCIA																						7	3000		50	70
CDS021		USGS		Geochemistry of rock samples from the National Geochemical Database: U.S. Geological Survey, Reston, VA.	U.S. Geological Survey	USGS		63.4972	-154.569	0.01				AAS	SEDIMENTARY	UNKNOWN	UNKNOWN	BRECCIA																										20		5
CDS021		USGS		Geochemistry of rock samples from the National Geochemical Database: U.S. Geological Survey, Reston, VA.	U.S. Geological Survey	USGS		63.4972	-154.569	0.01				COL	SEDIMENTARY	UNKNOWN	UNKNOWN	BRECCIA																													800
CDS021		USGS		Geochemistry of rock samples from the National Geochemical Database: U.S. Geological Survey, Reston, VA.	U.S. Geological Survey	USGS		63.4972	-154.569	0.01				ES	SEDIMENTARY	UNKNOWN	UNKNOWN	BRECCIA																						3	100	20		20			1000	0.5
CDS021		USGS		Geochemistry of rock samples from the National Geochemical Database: U.S. Geological Survey, Reston, VA.	U.S. Geological Survey	USGS		63.4972	-154.569	0.01				ISE	SEDIMENTARY	UNKNOWN	UNKNOWN	BRECCIA
CDS023		USGS		Geochemistry of rock samples from the National Geochemical Database: U.S. Geological Survey, Reston, VA.	U.S. Geological Survey	USGS		63.4972	-154.569	0.01				AAS	SEDIMENTARY	UNKNOWN	UNKNOWN	BRECCIA																										10		20
CDS023		USGS		Geochemistry of rock samples from the National Geochemical Database: U.S. Geological Survey, Reston, VA.	U.S. Geological Survey	USGS		63.4972	-154.569	0.01				COL	SEDIMENTARY	UNKNOWN	UNKNOWN	BRECCIA																													1200
CDS023		USGS		Geochemistry of rock samples from the National Geochemical Database: U.S. Geological Survey, Reston, VA.	U.S. Geological Survey	USGS		63.4972	-154.569	0.01				ES	SEDIMENTARY	UNKNOWN	UNKNOWN	BRECCIA																						10	200	30		15			1000	3
CDS023		USGS		Geochemistry of rock samples from the National Geochemical Database: U.S. Geological Survey, Reston, VA.	U.S. Geological Survey	USGS		63.4972	-154.569	0.01				ISE	SEDIMENTARY	UNKNOWN	UNKNOWN	BRECCIA
CDS027		USGS		Geochemistry of rock samples from the National Geochemical Database: U.S. Geological Survey, Reston, VA.	U.S. Geological Survey	USGS		63.5158	-154.588	0.01				AAS	SEDIMENTARY	UNKNOWN	UNKNOWN	BRECCIA																										30		5
CDS027		USGS		Geochemistry of rock samples from the National Geochemical Database: U.S. Geological Survey, Reston, VA.	U.S. Geological Survey	USGS		63.5158	-154.588	0.01				COL	SEDIMENTARY	UNKNOWN	UNKNOWN	BRECCIA																													60
CDS027		USGS		Geochemistry of rock samples from the National Geochemical Database: U.S. Geological Survey, Reston, VA.	U.S. Geological Survey	USGS		63.5158	-154.588	0.01				ES	SEDIMENTARY	UNKNOWN	UNKNOWN	BRECCIA																						3	100	20	5	20				0.7
CDS027		USGS		Geochemistry of rock samples from the National Geochemical Database: U.S. Geological Survey, Reston, VA.	U.S. Geological Survey	USGS		63.5158	-154.588	0.01				ISE	SEDIMENTARY	UNKNOWN	UNKNOWN	BRECCIA
CDT002		USGS		Geochemistry of rock samples from the National Geochemical Database: U.S. Geological Survey, Reston, VA.	U.S. Geological Survey	USGS		65.4486	-145.891	0.01				ES	SEDIMENTARY	UNKNOWN	UNKNOWN	BRECCIA																						10		20	7	200		500
CDT033		USGS		Geochemistry of rock samples from the National Geochemical Database: U.S. Geological Survey, Reston, VA.	U.S. Geological Survey	USGS		65.2436	-146.703	0.01				ES	SEDIMENTARY	UNKNOWN	UNKNOWN	BRECCIA																							1000	300	100	200
CDT049		USGS		Geochemistry of rock samples from the National Geochemical Database: U.S. Geological Survey, Reston, VA.	U.S. Geological Survey	USGS		65.1686	-146.96	0.01				ES	SEDIMENTARY	UNKNOWN	UNKNOWN	BRECCIA																						2		10
CDT051		USGS		Geochemistry of rock samples from the National Geochemical Database: U.S. Geological Survey, Reston, VA.	U.S. Geological Survey	USGS		65.1756	-146.962	0.01				ES	SEDIMENTARY	UNKNOWN	UNKNOWN	BRECCIA																						10	100	15		20
CDT069		USGS		Geochemistry of rock samples from the National Geochemical Database: U.S. Geological Survey, Reston, VA.	U.S. Geological Survey	USGS		65.2069	-146.889	0.01				ES	SEDIMENTARY	UNKNOWN	UNKNOWN	BRECCIA																						15	10	30	5	50
CDT096		USGS		Geochemistry of rock samples from the National Geochemical Database: U.S. Geological Survey, Reston, VA.	U.S. Geological Survey	USGS		65.0694	-146.094	0.01				ES	SEDIMENTARY	UNKNOWN	UNKNOWN	BRECCIA																						3	50	10		5				0.7
CEA733		USGS		Geochemistry of rock samples from the National Geochemical Database: U.S. Geological Survey, Reston, VA.	U.S. Geological Survey	USGS		65.8378	-146.963	0.01				ES	SEDIMENTARY	UNKNOWN	UNKNOWN	BRECCIA																						0.3	300	10	5	70
CEC698		USGS		Geochemistry of rock samples from the National Geochemical Database: U.S. Geological Survey, Reston, VA.	U.S. Geological Survey	USGS		65.4156	-144.979	0.01				ES	SEDIMENTARY	UNKNOWN	UNKNOWN	BRECCIA																						7	1000	70	50	300
CEC745		USGS		Geochemistry of rock samples from the National Geochemical Database: U.S. Geological Survey, Reston, VA.	U.S. Geological Survey	USGS		65.3978	-146.596	0.01				AAS	SEDIMENTARY	UNKNOWN	UNKNOWN	BRECCIA
CEC745		USGS		Geochemistry of rock samples from the National Geochemical Database: U.S. Geological Survey, Reston, VA.	U.S. Geological Survey	USGS		65.3978	-146.596	0.01				ES	SEDIMENTARY	UNKNOWN	UNKNOWN	BRECCIA																						15	300			500			2000	10
CEG934		USGS		Geochemistry of rock samples from the National Geochemical Database: U.S. Geological Survey, Reston, VA.	U.S. Geological Survey	USGS		56.7661	-134.252	0.01				AAS	SEDIMENTARY	UNKNOWN	UNKNOWN	BRECCIA																										45		130
CEG934		USGS		Geochemistry of rock samples from the National Geochemical Database: U.S. Geological Survey, Reston, VA.	U.S. Geological Survey	USGS		56.7661	-134.252	0.01				ES	SEDIMENTARY	UNKNOWN	UNKNOWN	BRECCIA																						2	1000	30	70	30
CEG936		USGS		Geochemistry of rock samples from the National Geochemical Database: U.S. Geological Survey, Reston, VA.	U.S. Geological Survey	USGS		56.7661	-134.252	0.01				AAS	SEDIMENTARY	UNKNOWN	UNKNOWN	BRECCIA																										40		70
CEG936		USGS		Geochemistry of rock samples from the National Geochemical Database: U.S. Geological Survey, Reston, VA.	U.S. Geological Survey	USGS		56.7661	-134.252	0.01				ES	SEDIMENTARY	UNKNOWN	UNKNOWN	BRECCIA																						5	1000	100	50	50
CEP543		USGS		Geochemistry of rock samples from the National Geochemical Database: U.S. Geological Survey, Reston, VA.	U.S. Geological Survey	USGS		56.4783	-132.026	0.01	3	3	3	AAS	SEDIMENTARY	UNKNOWN	UNKNOWN	BRECCIA																										50		95500
CEP543		USGS		Geochemistry of rock samples from the National Geochemical Database: U.S. Geological Survey, Reston, VA.	U.S. Geological Survey	USGS		56.4783	-132.026	0.01	3	3	3	ES	SEDIMENTARY	UNKNOWN	UNKNOWN	BRECCIA																						3	2000	30	150	100				70
CEP550		USGS		Geochemistry of rock samples from the National Geochemical Database: U.S. Geological Survey, Reston, VA.	U.S. Geological Survey	USGS		56.5108	-132.04	0.01				AAS	SEDIMENTARY	UNKNOWN	UNKNOWN	BRECCIA																										30		400
CEP550		USGS		Geochemistry of rock samples from the National Geochemical Database: U.S. Geological Survey, Reston, VA.	U.S. Geological Survey	USGS		56.5108	-132.04	0.01				ES	SEDIMENTARY	UNKNOWN	UNKNOWN	BRECCIA																						2	700	10	5	70		1000		7
CEX629		USGS		Geochemistry of rock samples from the National Geochemical Database: U.S. Geological Survey, Reston, VA.	U.S. Geological Survey	USGS		65.4305	-145.294	0.01				ES	SEDIMENTARY	UNKNOWN	UNKNOWN	BRECCIA																						1.5	70	15	10	10
CEX630		USGS		Geochemistry of rock samples from the National Geochemical Database: U.S. Geological Survey, Reston, VA.	U.S. Geological Survey	USGS		65.4305	-145.294	0.01				ES	SEDIMENTARY	UNKNOWN	UNKNOWN	BRECCIA																						0.2	10							0.7
CEX633		USGS		Geochemistry of rock samples from the National Geochemical Database: U.S. Geological Survey, Reston, VA.	U.S. Geological Survey	USGS		65.4167	-145.311	0.01				AAS	SEDIMENTARY	UNKNOWN	UNKNOWN	BRECCIA
CEX633		USGS		Geochemistry of rock samples from the National Geochemical Database: U.S. Geological Survey, Reston, VA.	U.S. Geological Survey	USGS		65.4167	-145.311	0.01				ES	SEDIMENTARY	UNKNOWN	UNKNOWN	BRECCIA																						0.5	100	7		5
CEX634		USGS		Geochemistry of rock samples from the National Geochemical Database: U.S. Geological Survey, Reston, VA.	U.S. Geological Survey	USGS		65.4333	-145.311	0.01				ES	SEDIMENTARY	UNKNOWN	UNKNOWN	BRECCIA																						1	100	10		10
CEX639		USGS		Geochemistry of rock samples from the National Geochemical Database: U.S. Geological Survey, Reston, VA.	U.S. Geological Survey	USGS		65.5347	-145.496	0.01				AAS	SEDIMENTARY	UNKNOWN	UNKNOWN	BRECCIA
CEX639		USGS		Geochemistry of rock samples from the National Geochemical Database: U.S. Geological Survey, Reston, VA.	U.S. Geological Survey	USGS		65.5347	-145.496	0.01				ES	SEDIMENTARY	UNKNOWN	UNKNOWN	BRECCIA																						0.3	20	5		5			500
CFG965		USGS		Geochemistry of rock samples from the National Geochemical Database: U.S. Geological Survey, Reston, VA.	U.S. Geological Survey	USGS		61.0992	-147.356	0.01				AAS	SEDIMENTARY	UNKNOWN	UNKNOWN	BRECCIA																											0.1	65	10	0.1
CFG965		USGS		Geochemistry of rock samples from the National Geochemical Database: U.S. Geological Survey, Reston, VA.	U.S. Geological Survey	USGS		61.0992	-147.356	0.01				ES	SEDIMENTARY	UNKNOWN	UNKNOWN	BRECCIA																						2	700	30	10	20
CFY935		USGS		Geochemistry of rock samples from the National Geochemical Database: U.S. Geological Survey, Reston, VA.	U.S. Geological Survey	USGS		58.1875	-154.632	0.01				AAS	SEDIMENTARY	UNKNOWN	UNKNOWN	BRECCIA																													10
CFY935		USGS		Geochemistry of rock samples from the National Geochemical Database: U.S. Geological Survey, Reston, VA.	U.S. Geological Survey	USGS		58.1875	-154.632	0.01				ES	SEDIMENTARY	UNKNOWN	UNKNOWN	BRECCIA																						0.5	50	5		7				0.7
CFY936		USGS		Geochemistry of rock samples from the National Geochemical Database: U.S. Geological Survey, Reston, VA.	U.S. Geological Survey	USGS		58.1875	-154.632	0.01				AAS	SEDIMENTARY	UNKNOWN	UNKNOWN	BRECCIA																											0.2	40	30
CFY936		USGS		Geochemistry of rock samples from the National Geochemical Database: U.S. Geological Survey, Reston, VA.	U.S. Geological Survey	USGS		58.1875	-154.632	0.01				ES	SEDIMENTARY	UNKNOWN	UNKNOWN	BRECCIA																						5	1000	100	50	70
CFY939		USGS		Geochemistry of rock samples from the National Geochemical Database: U.S. Geological Survey, Reston, VA.	U.S. Geological Survey	USGS		58.1892	-154.644	0.01				AAS	SEDIMENTARY	UNKNOWN	UNKNOWN	BRECCIA																												5	10
CFY939		USGS		Geochemistry of rock samples from the National Geochemical Database: U.S. Geological Survey, Reston, VA.	U.S. Geological Survey	USGS		58.1892	-154.644	0.01				ES	SEDIMENTARY	UNKNOWN	UNKNOWN	BRECCIA																						0.1	30
CFZ461		USGS		Geochemistry of rock samples from the National Geochemical Database: U.S. Geological Survey, Reston, VA.	U.S. Geological Survey	USGS		61.0653	-147.35	0.01				AAS	SEDIMENTARY	UNKNOWN	UNKNOWN	BRECCIA																											0.1	35	4500
CFZ461		USGS		Geochemistry of rock samples from the National Geochemical Database: U.S. Geological Survey, Reston, VA.	U.S. Geological Survey	USGS		61.0653	-147.35	0.01				ES	SEDIMENTARY	UNKNOWN	UNKNOWN	BRECCIA																						5	1000	20	10	70			7000	1
CFZ464		USGS		Geochemistry of rock samples from the National Geochemical Database: U.S. Geological Survey, Reston, VA.	U.S. Geological Survey	USGS		61.0722	-147.344	0.01				AAS	SEDIMENTARY	UNKNOWN	UNKNOWN	BRECCIA																											3.8	2400	40
CFZ464		USGS		Geochemistry of rock samples from the National Geochemical Database: U.S. Geological Survey, Reston, VA.	U.S. Geological Survey	USGS		61.0722	-147.344	0.01				ES	SEDIMENTARY	UNKNOWN	UNKNOWN	BRECCIA																						1	3000	7		200		5000		7
CFZ653		USGS		Geochemistry of rock samples from the National Geochemical Database: U.S. Geological Survey, Reston, VA.	U.S. Geological Survey	USGS		60.9278	-144.958	0.01				AAS	SEDIMENTARY	UNKNOWN	UNKNOWN	BRECCIA																												10
CFZ653		USGS		Geochemistry of rock samples from the National Geochemical Database: U.S. Geological Survey, Reston, VA.	U.S. Geological Survey	USGS		60.9278	-144.958	0.01				ES	SEDIMENTARY	UNKNOWN	UNKNOWN	BRECCIA																						3	1000	50	30	150
CFZ657		USGS		Geochemistry of rock samples from the National Geochemical Database: U.S. Geological Survey, Reston, VA.	U.S. Geological Survey	USGS		60.9722	-144.944	0.01				AAS	SEDIMENTARY	UNKNOWN	UNKNOWN	BRECCIA																												60
CFZ657		USGS		Geochemistry of rock samples from the National Geochemical Database: U.S. Geological Survey, Reston, VA.	U.S. Geological Survey	USGS		60.9722	-144.944	0.01				ES	SEDIMENTARY	UNKNOWN	UNKNOWN	BRECCIA																						7	3000	30	20	10
CGE649		USGS		Geochemistry of rock samples from the National Geochemical Database: U.S. Geological Survey, Reston, VA.	U.S. Geological Survey	USGS		55.6075	-161.201	0.01				AAS	SEDIMENTARY	UNKNOWN	UNKNOWN	BRECCIA																												30	10
CGE649		USGS		Geochemistry of rock samples from the National Geochemical Database: U.S. Geological Survey, Reston, VA.	U.S. Geological Survey	USGS		55.6075	-161.201	0.01				ES	SEDIMENTARY	UNKNOWN	UNKNOWN	BRECCIA																						7	1000	10	20	5
CGE662		USGS		Geochemistry of rock samples from the National Geochemical Database: U.S. Geological Survey, Reston, VA.	U.S. Geological Survey	USGS		55.6997	-160.324	0.01				AAS	SEDIMENTARY	UNKNOWN	UNKNOWN	BRECCIA																												80	60
CGE662		USGS		Geochemistry of rock samples from the National Geochemical Database: U.S. Geological Survey, Reston, VA.	U.S. Geological Survey	USGS		55.6997	-160.324	0.01				ES	SEDIMENTARY	UNKNOWN	UNKNOWN	BRECCIA																						5	1000	50	20	30
CGE673		USGS		Geochemistry of rock samples from the National Geochemical Database: U.S. Geological Survey, Reston, VA.	U.S. Geological Survey	USGS		55.2492	-160.706	0.01				AAS	SEDIMENTARY	UNKNOWN	UNKNOWN	BRECCIA																												35	10
CGE673		USGS		Geochemistry of rock samples from the National Geochemical Database: U.S. Geological Survey, Reston, VA.	U.S. Geological Survey	USGS		55.2492	-160.706	0.01				ES	SEDIMENTARY	UNKNOWN	UNKNOWN	BRECCIA																						2	500	10	20	50
CGE685		USGS		Geochemistry of rock samples from the National Geochemical Database: U.S. Geological Survey, Reston, VA.	U.S. Geological Survey	USGS		55.8508	-160.031	0.01				AAS	SEDIMENTARY	UNKNOWN	UNKNOWN	BRECCIA																												35	10
CGE685		USGS		Geochemistry of rock samples from the National Geochemical Database: U.S. Geological Survey, Reston, VA.	U.S. Geological Survey	USGS		55.8508	-160.031	0.01				ES	SEDIMENTARY	UNKNOWN	UNKNOWN	BRECCIA																						5	700		5	5
CGE702		USGS		Geochemistry of rock samples from the National Geochemical Database: U.S. Geological Survey, Reston, VA.	U.S. Geological Survey	USGS		55.8219	-160.079	0.01				AAS	SEDIMENTARY	UNKNOWN	UNKNOWN	BRECCIA																												30	10
CGE702		USGS		Geochemistry of rock samples from the National Geochemical Database: U.S. Geological Survey, Reston, VA.	U.S. Geological Survey	USGS		55.8219	-160.079	0.01				ES	SEDIMENTARY	UNKNOWN	UNKNOWN	BRECCIA																						5	200			5
CGE704		USGS		Geochemistry of rock samples from the National Geochemical Database: U.S. Geological Survey, Reston, VA.	U.S. Geological Survey	USGS		55.8492	-160.142	0.01				AAS	SEDIMENTARY	UNKNOWN	UNKNOWN	BRECCIA																													30
CGE704		USGS		Geochemistry of rock samples from the National Geochemical Database: U.S. Geological Survey, Reston, VA.	U.S. Geological Survey	USGS		55.8492	-160.142	0.01				ES	SEDIMENTARY	UNKNOWN	UNKNOWN	BRECCIA																						5	20	5	15	50
CGE729		USGS		Geochemistry of rock samples from the National Geochemical Database: U.S. Geological Survey, Reston, VA.	U.S. Geological Survey	USGS		55.6092	-160.807	0.01				AAS	SEDIMENTARY	UNKNOWN	UNKNOWN	BRECCIA																												830	10
CGE729		USGS		Geochemistry of rock samples from the National Geochemical Database: U.S. Geological Survey, Reston, VA.	U.S. Geological Survey	USGS		55.6092	-160.807	0.01				ES	SEDIMENTARY	UNKNOWN	UNKNOWN	BRECCIA																						3	1000	10	5	50		1500
CGE738		USGS		Geochemistry of rock samples from the National Geochemical Database: U.S. Geological Survey, Reston, VA.	U.S. Geological Survey	USGS		55.5325	-160.563	0.01				AAS	SEDIMENTARY	UNKNOWN	UNKNOWN	BRECCIA																												130
CGE738		USGS		Geochemistry of rock samples from the National Geochemical Database: U.S. Geological Survey, Reston, VA.	U.S. Geological Survey	USGS		55.5325	-160.563	0.01				ES	SEDIMENTARY	UNKNOWN	UNKNOWN	BRECCIA																						7	300	5	20	70
CGF322		USGS		Geochemistry of rock samples from the National Geochemical Database: U.S. Geological Survey, Reston, VA.	U.S. Geological Survey	USGS		55.7131	-159.554	0.01				AAS	SEDIMENTARY	UNKNOWN	UNKNOWN	BRECCIA																												85	30
CGF322		USGS		Geochemistry of rock samples from the National Geochemical Database: U.S. Geological Survey, Reston, VA.	U.S. Geological Survey	USGS		55.7131	-159.554	0.01				ES	SEDIMENTARY	UNKNOWN	UNKNOWN	BRECCIA																						15	2000	100	100	100		200
CGF439		USGS		Geochemistry of rock samples from the National Geochemical Database: U.S. Geological Survey, Reston, VA.	U.S. Geological Survey	USGS		55.6028	-160.455	0.01				AAS	SEDIMENTARY	UNKNOWN	UNKNOWN	BRECCIA																												5	500
CGF439		USGS		Geochemistry of rock samples from the National Geochemical Database: U.S. Geological Survey, Reston, VA.	U.S. Geological Survey	USGS		55.6028	-160.455	0.01				ES	SEDIMENTARY	UNKNOWN	UNKNOWN	BRECCIA																						15	200	7		100			200
CGQ257		USGS		Geochemistry of rock samples from the National Geochemical Database: U.S. Geological Survey, Reston, VA.	U.S. Geological Survey	USGS		59.1083	-154.875	0.01				ES	SEDIMENTARY	UNKNOWN	UNKNOWN	BRECCIA																						5	1500	30	50	50
CGQ261		USGS		Geochemistry of rock samples from the National Geochemical Database: U.S. Geological Survey, Reston, VA.	U.S. Geological Survey	USGS		59.1083	-154.875	0.01				ES	SEDIMENTARY	UNKNOWN	UNKNOWN	BRECCIA																						5	5000	10	50	500		700		5
CGQ645		USGS		Geochemistry of rock samples from the National Geochemical Database: U.S. Geological Survey, Reston, VA.	U.S. Geological Survey	USGS		58.6214	-154.35	0.01	2	2	2	AAS	SEDIMENTARY	UNKNOWN	UNKNOWN	BRECCIA																												75
CGQ645		USGS		Geochemistry of rock samples from the National Geochemical Database: U.S. Geological Survey, Reston, VA.	U.S. Geological Survey	USGS		58.6214	-154.35	0.01	2	2	2	ES	SEDIMENTARY	UNKNOWN	UNKNOWN	BRECCIA																						5	1000	30	50	100
CGQ706		USGS		Geochemistry of rock samples from the National Geochemical Database: U.S. Geological Survey, Reston, VA.	U.S. Geological Survey	USGS		58.8194	-154.536	0.01				AAS	SEDIMENTARY	UNKNOWN	UNKNOWN	BRECCIA																											0.1	55
CGQ706		USGS		Geochemistry of rock samples from the National Geochemical Database: U.S. Geological Survey, Reston, VA.	U.S. Geological Survey	USGS		58.8194	-154.536	0.01				ES	SEDIMENTARY	UNKNOWN	UNKNOWN	BRECCIA																						5	2000			10
CHA061		USGS		Geochemistry of rock samples from the National Geochemical Database: U.S. Geological Survey, Reston, VA.	U.S. Geological Survey	USGS		54.6992	-132.729	0.01				AAS	SEDIMENTARY	UNKNOWN	UNKNOWN	BRECCIA
CHA061		USGS		Geochemistry of rock samples from the National Geochemical Database: U.S. Geological Survey, Reston, VA.	U.S. Geological Survey	USGS		54.6992	-132.729	0.01				ES	SEDIMENTARY	UNKNOWN	UNKNOWN	BRECCIA																						1.5	1000	15	7	30
CHG196		USGS		Geochemistry of rock samples from the National Geochemical Database: U.S. Geological Survey, Reston, VA.	U.S. Geological Survey	USGS		55.6811	-160.907	0.01				AAS	SEDIMENTARY	UNKNOWN	UNKNOWN	BRECCIA																												65	80
CHG196		USGS		Geochemistry of rock samples from the National Geochemical Database: U.S. Geological Survey, Reston, VA.	U.S. Geological Survey	USGS		55.6811	-160.907	0.01				ES	SEDIMENTARY	UNKNOWN	UNKNOWN	BRECCIA																						20	30	5		70		200	500
CHG259		USGS		Geochemistry of rock samples from the National Geochemical Database: U.S. Geological Survey, Reston, VA.	U.S. Geological Survey	USGS		55.3219	-160.418	0.01				AAS	SEDIMENTARY	UNKNOWN	UNKNOWN	BRECCIA																												20	600
CHG259		USGS		Geochemistry of rock samples from the National Geochemical Database: U.S. Geological Survey, Reston, VA.	U.S. Geological Survey	USGS		55.3219	-160.418	0.01				ES	SEDIMENTARY	UNKNOWN	UNKNOWN	BRECCIA																						20	200	5		150		200	200	1
CHG347		USGS		Geochemistry of rock samples from the National Geochemical Database: U.S. Geological Survey, Reston, VA.	U.S. Geological Survey	USGS		55.3	-160.483	0.01				AAS	SEDIMENTARY	UNKNOWN	UNKNOWN	BRECCIA																												15	1200
CHG347		USGS		Geochemistry of rock samples from the National Geochemical Database: U.S. Geological Survey, Reston, VA.	U.S. Geological Survey	USGS		55.3	-160.483	0.01				ES	SEDIMENTARY	UNKNOWN	UNKNOWN	BRECCIA																						3	50	5		100			1000	15
CHG387		USGS		Geochemistry of rock samples from the National Geochemical Database: U.S. Geological Survey, Reston, VA.	U.S. Geological Survey	USGS		55.1936	-160.681	0.01				AAS	SEDIMENTARY	UNKNOWN	UNKNOWN	BRECCIA																													20
CHG387		USGS		Geochemistry of rock samples from the National Geochemical Database: U.S. Geological Survey, Reston, VA.	U.S. Geological Survey	USGS		55.1936	-160.681	0.01				ES	SEDIMENTARY	UNKNOWN	UNKNOWN	BRECCIA																						2	20	10	10	70
CHG400		USGS		Geochemistry of rock samples from the National Geochemical Database: U.S. Geological Survey, Reston, VA.	U.S. Geological Survey	USGS		55.6797	-160.904	0.01				AAS	SEDIMENTARY	UNKNOWN	UNKNOWN	BRECCIA																													60
CHG400		USGS		Geochemistry of rock samples from the National Geochemical Database: U.S. Geological Survey, Reston, VA.	U.S. Geological Survey	USGS		55.6797	-160.904	0.01				ES	SEDIMENTARY	UNKNOWN	UNKNOWN	BRECCIA																						5	100	20		20
CHG422		USGS		Geochemistry of rock samples from the National Geochemical Database: U.S. Geological Survey, Reston, VA.	U.S. Geological Survey	USGS		55.5944	-160.497	0.01				AAS	SEDIMENTARY	UNKNOWN	UNKNOWN	BRECCIA																												35	80
CHG422		USGS		Geochemistry of rock samples from the National Geochemical Database: U.S. Geological Survey, Reston, VA.	U.S. Geological Survey	USGS		55.5944	-160.497	0.01				ES	SEDIMENTARY	UNKNOWN	UNKNOWN	BRECCIA																						10	30	5		70		200
CHX865		USGS		Geochemistry of rock samples from the National Geochemical Database: U.S. Geological Survey, Reston, VA.	U.S. Geological Survey	USGS		60.2642	-159.714	0.01				AAS	SEDIMENTARY	UNKNOWN	UNKNOWN	BRECCIA																											0.1	110	20
CHX865		USGS		Geochemistry of rock samples from the National Geochemical Database: U.S. Geological Survey, Reston, VA.	U.S. Geological Survey	USGS		60.2642	-159.714	0.01				ES	SEDIMENTARY	UNKNOWN	UNKNOWN	BRECCIA																						10	1500	50	15	100
CHY402		USGS		Geochemistry of rock samples from the National Geochemical Database: U.S. Geological Survey, Reston, VA.	U.S. Geological Survey	USGS		60.1853	-159.978	0.01				AAS	SEDIMENTARY	UNKNOWN	UNKNOWN	BRECCIA																												50
CHY402		USGS		Geochemistry of rock samples from the National Geochemical Database: U.S. Geological Survey, Reston, VA.	U.S. Geological Survey	USGS		60.1853	-159.978	0.01				ES	SEDIMENTARY	UNKNOWN	UNKNOWN	BRECCIA																						3	1500		10	70
CHZ009		USGS		Geochemistry of rock samples from the National Geochemical Database: U.S. Geological Survey, Reston, VA.	U.S. Geological Survey	USGS		60.0494	-160.64	0.01				AAS	SEDIMENTARY	UNKNOWN	UNKNOWN	BRECCIA																											0.1	80
CHZ009		USGS		Geochemistry of rock samples from the National Geochemical Database: U.S. Geological Survey, Reston, VA.	U.S. Geological Survey	USGS		60.0494	-160.64	0.01				ES	SEDIMENTARY	UNKNOWN	UNKNOWN	BRECCIA																						7	1500	15	70	70
CJL594		USGS		Geochemistry of rock samples from the National Geochemical Database: U.S. Geological Survey, Reston, VA.	U.S. Geological Survey	USGS		55.1178	-131.543	0.01				AAS	SEDIMENTARY	UNKNOWN	UNKNOWN	BRECCIA																												10
CJL594		USGS		Geochemistry of rock samples from the National Geochemical Database: U.S. Geological Survey, Reston, VA.	U.S. Geological Survey	USGS		55.1178	-131.543	0.01				ES	SEDIMENTARY	UNKNOWN	UNKNOWN	BRECCIA																						0.5	100
D115577		USGS		Geochemistry of rock samples from the National Geochemical Database: U.S. Geological Survey, Reston, VA.	U.S. Geological Survey	USGS		45.8833	-111.25	0.01	67	67	67	MISC	SEDIMENTARY	UNKNOWN	UNKNOWN	BRECCIA																	43.4
D115577		USGS		Geochemistry of rock samples from the National Geochemical Database: U.S. Geological Survey, Reston, VA.	U.S. Geological Survey	USGS		45.8833	-111.25	0.01	67	67	67	UNKNOWN	SEDIMENTARY	UNKNOWN	UNKNOWN	BRECCIA		1.3		0.19		0.16		0.1			1.4	52.5		0.2								0.13	32	2.4		1.5
D115596		USGS		Geochemistry of rock samples from the National Geochemical Database: U.S. Geological Survey, Reston, VA.	U.S. Geological Survey	USGS		45.8833	-111.25	0.01	67	67	67	MISC	SEDIMENTARY	UNKNOWN	UNKNOWN	BRECCIA																	43.2
D115596		USGS		Geochemistry of rock samples from the National Geochemical Database: U.S. Geological Survey, Reston, VA.	U.S. Geological Survey	USGS		45.8833	-111.25	0.01	67	67	67	UNKNOWN	SEDIMENTARY	UNKNOWN	UNKNOWN	BRECCIA		1.2		0.08		0.3		0.06			0.5	55.6	0.12	0.26								0.14	31	7.6		1.3		120
D117321		USGS		Geochemistry of rock samples from the National Geochemical Database: U.S. Geological Survey, Reston, VA.	U.S. Geological Survey	USGS		36.25	-85.6333	0.01	69	69	69	UNKNOWN	SEDIMENTARY	UNKNOWN	UNKNOWN	BRECCIA																						2	5000	15		30
D122422		USGS		Geochemistry of rock samples from the National Geochemical Database: U.S. Geological Survey, Reston, VA.	U.S. Geological Survey	USGS		51.4333	179.183	0.01				AAS	SEDIMENTARY	UNKNOWN	UNKNOWN	BRECCIA																												50
D122422		USGS		Geochemistry of rock samples from the National Geochemical Database: U.S. Geological Survey, Reston, VA.	U.S. Geological Survey	USGS		51.4333	179.183	0.01				COL	SEDIMENTARY	UNKNOWN	UNKNOWN	BRECCIA															0.101
D122422		USGS		Geochemistry of rock samples from the National Geochemical Database: U.S. Geological Survey, Reston, VA.	U.S. Geological Survey	USGS		51.4333	179.183	0.01				ES	SEDIMENTARY	UNKNOWN	UNKNOWN	BRECCIA																						7	700	30	30	150
D122424		USGS		Geochemistry of rock samples from the National Geochemical Database: U.S. Geological Survey, Reston, VA.	U.S. Geological Survey	USGS		51.4333	179.183	0.01				AAS	SEDIMENTARY	UNKNOWN	UNKNOWN	BRECCIA																												75
D122424		USGS		Geochemistry of rock samples from the National Geochemical Database: U.S. Geological Survey, Reston, VA.	U.S. Geological Survey	USGS		51.4333	179.183	0.01				COL	SEDIMENTARY	UNKNOWN	UNKNOWN	BRECCIA															0.0687
D122424		USGS		Geochemistry of rock samples from the National Geochemical Database: U.S. Geological Survey, Reston, VA.	U.S. Geological Survey	USGS		51.4333	179.183	0.01				ES	SEDIMENTARY	UNKNOWN	UNKNOWN	BRECCIA																						5	700	20	30	200
D141267		USGS		Geochemistry of rock samples from the National Geochemical Database: U.S. Geological Survey, Reston, VA.	U.S. Geological Survey	USGS		41.2897	-107.414	0.01	8	9.5	11	UNKNOWN	SEDIMENTARY	UNKNOWN	UNKNOWN	BRECCIA																						7	30			7			1500
D149097		USGS		Geochemistry of rock samples from the National Geochemical Database: U.S. Geological Survey, Reston, VA.	U.S. Geological Survey	USGS		39.65	-105.733	0.01	15	15	15	UNKNOWN	SEDIMENTARY	UNKNOWN	UNKNOWN	BRECCIA																						1.5	200	7	3	50
D149275		USGS		Geochemistry of rock samples from the National Geochemical Database: U.S. Geological Survey, Reston, VA.	U.S. Geological Survey	USGS		42	-118	0.01	43	43	43	UNKNOWN	SEDIMENTARY	UNKNOWN	UNKNOWN	BRECCIA																						3	200	15		3
D155053		USGS		Geochemistry of rock samples from the National Geochemical Database: U.S. Geological Survey, Reston, VA.	U.S. Geological Survey	USGS		38.5	-110.75	0.01	70	70	70	UNKNOWN	SEDIMENTARY	UNKNOWN	UNKNOWN	BRECCIA																					3	1.5	2000	50	30	5000				7
D169266		USGS		Geochemistry of rock samples from the National Geochemical Database: U.S. Geological Survey, Reston, VA.	U.S. Geological Survey	USGS		47.25	-109.375	0.01	68	68	68	UNKNOWN	SEDIMENTARY	UNKNOWN	UNKNOWN	BRECCIA		52.9		1.15						0.0279	0.12	24.8	0.04	0.1								0.3	300	3		2				2
D169267		USGS		Geochemistry of rock samples from the National Geochemical Database: U.S. Geological Survey, Reston, VA.	U.S. Geological Survey	USGS		47.25	-109.375	0.01	68	68	68	UNKNOWN	SEDIMENTARY	UNKNOWN	UNKNOWN	BRECCIA		5.91		0.489						0.0771	0.34	52.4	0.02	0.11							2	0.7	500	5		1.5
D169268		USGS		Geochemistry of rock samples from the National Geochemical Database: U.S. Geological Survey, Reston, VA.	U.S. Geological Survey	USGS		47.25	-109.375	0.01	68	68	68	UNKNOWN	SEDIMENTARY	UNKNOWN	UNKNOWN	BRECCIA		15.5	0.0308	0.712						0.0978	0.2	46.6	0.03	0.19							5	0.7	500	10		15				3
D169269		USGS		Geochemistry of rock samples from the National Geochemical Database: U.S. Geological Survey, Reston, VA.	U.S. Geological Survey	USGS		47.25	-109.375	0.01	68	68	68	UNKNOWN	SEDIMENTARY	UNKNOWN	UNKNOWN	BRECCIA		6.76		0.804						0.202	0.25	52.9	0.02	0.17							2	0.1	700			5				10
D169270		USGS		Geochemistry of rock samples from the National Geochemical Database: U.S. Geological Survey, Reston, VA.	U.S. Geological Survey	USGS		47.25	-109.375	0.01	68	68	68	UNKNOWN	SEDIMENTARY	UNKNOWN	UNKNOWN	BRECCIA		9.36		0.343							0.32	50.1	0.03	0.08							3	0.07	200			2
D169271		USGS		Geochemistry of rock samples from the National Geochemical Database: U.S. Geological Survey, Reston, VA.	U.S. Geological Survey	USGS		47.25	-109.375	0.01	68	68	68	UNKNOWN	SEDIMENTARY	UNKNOWN	UNKNOWN	BRECCIA		2.32		0.616							0.56	55.8	0.04	0.13							0.3	0.05	50
D169272		USGS		Geochemistry of rock samples from the National Geochemical Database: U.S. Geological Survey, Reston, VA.	U.S. Geological Survey	USGS		47.25	-109.375	0.01	68	68	68	UNKNOWN	SEDIMENTARY	UNKNOWN	UNKNOWN	BRECCIA		7.41	0.0303	0.741						0.118	0.34	52.4	0.03	0.28							2	0.3	700	5		1.5
D169273		USGS		Geochemistry of rock samples from the National Geochemical Database: U.S. Geological Survey, Reston, VA.	U.S. Geological Survey	USGS		47.25	-109.375	0.01	68	68	68	UNKNOWN	SEDIMENTARY	UNKNOWN	UNKNOWN	BRECCIA		12.6								0.125	0.17	49.4	0.03	0.1							3	0.3	700	2		1.5
D169274		USGS		Geochemistry of rock samples from the National Geochemical Database: U.S. Geological Survey, Reston, VA.	U.S. Geological Survey	USGS		47.25	-109.375	0.01	68	68	68	UNKNOWN	SEDIMENTARY	UNKNOWN	UNKNOWN	BRECCIA		8.89								0.0756	0.24	53.8	0.02	0.11							2	0.3	500	3		1.5
D169275		USGS		Geochemistry of rock samples from the National Geochemical Database: U.S. Geological Survey, Reston, VA.	U.S. Geological Survey	USGS		47.25	-109.375	0.01	68	68	68	UNKNOWN	SEDIMENTARY	UNKNOWN	UNKNOWN	BRECCIA		10.6	0.0354							0.151	0.31	51.9	0.03	0.23							3	0.1	700			2				1.5
D169276		USGS		Geochemistry of rock samples from the National Geochemical Database: U.S. Geological Survey, Reston, VA.	U.S. Geological Survey	USGS		47.25	-109.375	0.01	68	68	68	UNKNOWN	SEDIMENTARY	UNKNOWN	UNKNOWN	BRECCIA		7.77	0.0288	0.817						0.143	0.48	52.4	0.03	0.21							3	0.1	700	5		1
D169277		USGS		Geochemistry of rock samples from the National Geochemical Database: U.S. Geological Survey, Reston, VA.	U.S. Geological Survey	USGS		47.25	-109.375	0.01	68	68	68	UNKNOWN	SEDIMENTARY	UNKNOWN	UNKNOWN	BRECCIA		2.91								0.0266	0.29	57.4	0.03	0.06							1	0.05	300			1
D169278		USGS		Geochemistry of rock samples from the National Geochemical Database: U.S. Geological Survey, Reston, VA.	U.S. Geological Survey	USGS		47.25	-109.375	0.01	68	68	68	UNKNOWN	SEDIMENTARY	UNKNOWN	UNKNOWN	BRECCIA		8.95		0.26						0.23	0.24	51.8	0.02	0.04							3	0.1	1000			1
D169279		USGS		Geochemistry of rock samples from the National Geochemical Database: U.S. Geological Survey, Reston, VA.	U.S. Geological Survey	USGS		47.25	-109.375	0.01	68	68	68	UNKNOWN	SEDIMENTARY	UNKNOWN	UNKNOWN	BRECCIA		10.1	0.0351	1.04						0.103	0.38	49.6	0.03	0.36							3	0.5	700	7		2				1
D169280		USGS		Geochemistry of rock samples from the National Geochemical Database: U.S. Geological Survey, Reston, VA.	U.S. Geological Survey	USGS		47.25	-109.375	0.01	68	68	68	UNKNOWN	SEDIMENTARY	UNKNOWN	UNKNOWN	BRECCIA		7.63		0.202						0.0664	0.24	53.1	0.02	0.12							3	0.3	500	3		5				2
D169281		USGS		Geochemistry of rock samples from the National Geochemical Database: U.S. Geological Survey, Reston, VA.	U.S. Geological Survey	USGS		47.25	-109.375	0.01	68	68	68	UNKNOWN	SEDIMENTARY	UNKNOWN	UNKNOWN	BRECCIA		5								0.0864	0.35	56	0.02	0.1							2	0.7	500	5		1
D169282		USGS		Geochemistry of rock samples from the National Geochemical Database: U.S. Geological Survey, Reston, VA.	U.S. Geological Survey	USGS		47.25	-109.375	0.01	68	68	68	UNKNOWN	SEDIMENTARY	UNKNOWN	UNKNOWN	BRECCIA		8.77	0.0265	1.64						0.133	0.27	52.7	0.03	0.21							2	0.3	700	3		3				1
D169283		USGS		Geochemistry of rock samples from the National Geochemical Database: U.S. Geological Survey, Reston, VA.	U.S. Geological Survey	USGS		47.25	-109.375	0.01	68	68	68	UNKNOWN	SEDIMENTARY	UNKNOWN	UNKNOWN	BRECCIA		14.8	0.0296	1.51						0.111	0.23	46.5	0.03	0.24							5	1	700	7		5				1.5
D169284		USGS		Geochemistry of rock samples from the National Geochemical Database: U.S. Geological Survey, Reston, VA.	U.S. Geological Survey	USGS		47.25	-109.375	0.01	68	68	68	UNKNOWN	SEDIMENTARY	UNKNOWN	UNKNOWN	BRECCIA		10	0.0301	1.3						0.0914	0.24	50.7	0.03	0.22							3	0.5	500	5		3				2
D169285		USGS		Geochemistry of rock samples from the National Geochemical Database: U.S. Geological Survey, Reston, VA.	U.S. Geological Survey	USGS		47.25	-109.375	0.01	68	68	68	UNKNOWN	SEDIMENTARY	UNKNOWN	UNKNOWN	BRECCIA		11.2	0.0339	1.37						0.155	0.28	48.7	0.03	0.36							5	0.3	1000	7		3				1.5
D169286		USGS		Geochemistry of rock samples from the National Geochemical Database: U.S. Geological Survey, Reston, VA.	U.S. Geological Survey	USGS		47.25	-109.375	0.01	68	68	68	UNKNOWN	SEDIMENTARY	UNKNOWN	UNKNOWN	BRECCIA		6.43		0.606						0.092	0.22	53.1	0.03	0.09							2	0.7	700	5
D169287		USGS		Geochemistry of rock samples from the National Geochemical Database: U.S. Geological Survey, Reston, VA.	U.S. Geological Survey	USGS		47.25	-109.375	0.01	68	68	68	UNKNOWN	SEDIMENTARY	UNKNOWN	UNKNOWN	BRECCIA		9.64	0.0342	0.723						0.101	0.38	50.9	0.03	0.37							3	0.5	700	7		1				1
D169288		USGS		Geochemistry of rock samples from the National Geochemical Database: U.S. Geological Survey, Reston, VA.	U.S. Geological Survey	USGS		47.25	-109.375	0.01	68	68	68	UNKNOWN	SEDIMENTARY	UNKNOWN	UNKNOWN	BRECCIA		9.82	0.022	0.578						0.184	0.24	50.7	0.03	0.22							3	0.2	1000	3		3				7
D169289		USGS		Geochemistry of rock samples from the National Geochemical Database: U.S. Geological Survey, Reston, VA.	U.S. Geological Survey	USGS		47.25	-109.375	0.01	68	68	68	UNKNOWN	SEDIMENTARY	UNKNOWN	UNKNOWN	BRECCIA		25.9	0.103	1.38						0.0989	0.34	39.3	0.03	0.59							10	0.2	700	3		3				1
D169290		USGS		Geochemistry of rock samples from the National Geochemical Database: U.S. Geological Survey, Reston, VA.	U.S. Geological Survey	USGS		47.25	-109.375	0.01	68	68	68	UNKNOWN	SEDIMENTARY	UNKNOWN	UNKNOWN	BRECCIA		7.52	0.0227	0.676						0.0988	0.25	51.8	0.03	0.09							2	0.5	700	3
D169291		USGS		Geochemistry of rock samples from the National Geochemical Database: U.S. Geological Survey, Reston, VA.	U.S. Geological Survey	USGS		47.25	-109.375	0.01	68	68	68	UNKNOWN	SEDIMENTARY	UNKNOWN	UNKNOWN	BRECCIA		7.34	0.0323	0.877						0.148	0.54	50.8	0.02	0.21							2	0.2	1000
D169292		USGS		Geochemistry of rock samples from the National Geochemical Database: U.S. Geological Survey, Reston, VA.	U.S. Geological Survey	USGS		47.25	-109.375	0.01	68	68	68	UNKNOWN	SEDIMENTARY	UNKNOWN	UNKNOWN	BRECCIA		6.23	0.0369	1.03						0.181	0.34	51.9	0.03	0.27							2	0.5	1000	3		3				0.7
D169293		USGS		Geochemistry of rock samples from the National Geochemical Database: U.S. Geological Survey, Reston, VA.	U.S. Geological Survey	USGS		47.25	-109.375	0.01	68	68	68	UNKNOWN	SEDIMENTARY	UNKNOWN	UNKNOWN	BRECCIA		4.79								0.0946	0.37	53.9	0.02	0.1							1.5	0.3	700			5				7
D169294		USGS		Geochemistry of rock samples from the National Geochemical Database: U.S. Geological Survey, Reston, VA.	U.S. Geological Survey	USGS		47.25	-109.375	0.01	68	68	68	UNKNOWN	SEDIMENTARY	UNKNOWN	UNKNOWN	BRECCIA		2.65		0.391						0.0927	0.3	54.3	0.02	0.08							1	0.1	700
D169295		USGS		Geochemistry of rock samples from the National Geochemical Database: U.S. Geological Survey, Reston, VA.	U.S. Geological Survey	USGS		47.25	-109.375	0.01	68	68	68	UNKNOWN	SEDIMENTARY	UNKNOWN	UNKNOWN	BRECCIA		2.84								0.0306	0.29	55.2	0.03	0.06							1.5	0.05	300
D169296		USGS		Geochemistry of rock samples from the National Geochemical Database: U.S. Geological Survey, Reston, VA.	U.S. Geological Survey	USGS		47.25	-109.375	0.01	68	68	68	UNKNOWN	SEDIMENTARY	UNKNOWN	UNKNOWN	BRECCIA		9.88	0.033	1.07						0.196	0.26	49.6	0.03	0.22							5	0.2	1000	3		7				20
D169297		USGS		Geochemistry of rock samples from the National Geochemical Database: U.S. Geological Survey, Reston, VA.	U.S. Geological Survey	USGS		47.25	-109.375	0.01	68	68	68	UNKNOWN	SEDIMENTARY	UNKNOWN	UNKNOWN	BRECCIA		49.2	0.0202	0.461						0.0307	0.12	24.3	0.03	0.11								0.3	300	3		2				1.5
D169298		USGS		Geochemistry of rock samples from the National Geochemical Database: U.S. Geological Survey, Reston, VA.	U.S. Geological Survey	USGS		47.25	-109.375	0.01	68	68	68	UNKNOWN	SEDIMENTARY	UNKNOWN	UNKNOWN	BRECCIA		7.96	0.0304	1.15						0.127	0.28	52.1	0.03	0.18							2	0.2	700			3				1
D169299		USGS		Geochemistry of rock samples from the National Geochemical Database: U.S. Geological Survey, Reston, VA.	U.S. Geological Survey	USGS		47.25	-109.375	0.01	68	68	68	UNKNOWN	SEDIMENTARY	UNKNOWN	UNKNOWN	BRECCIA		7.48	0.0469	1.07						0.121	0.38	51.6	0.03	0.29							2	0.3	700	3		3
D169300		USGS		Geochemistry of rock samples from the National Geochemical Database: U.S. Geological Survey, Reston, VA.	U.S. Geological Survey	USGS		47.25	-109.375	0.01	68	68	68	UNKNOWN	SEDIMENTARY	UNKNOWN	UNKNOWN	BRECCIA		2.14	0.0429	0.312						0.197	0.75	54.9	0.02	0.07							0.7	0.1	1000			1				1
D169301		USGS		Geochemistry of rock samples from the National Geochemical Database: U.S. Geological Survey, Reston, VA.	U.S. Geological Survey	USGS		47.25	-109.375	0.01	68	68	68	UNKNOWN	SEDIMENTARY	UNKNOWN	UNKNOWN	BRECCIA		8.97	0.0456	1.05						0.106	0.41	50.1	0.03	0.33							5	0.5	700	5		3				1
D169302		USGS		Geochemistry of rock samples from the National Geochemical Database: U.S. Geological Survey, Reston, VA.	U.S. Geological Survey	USGS		47.25	-109.375	0.01	68	68	68	UNKNOWN	SEDIMENTARY	UNKNOWN	UNKNOWN	BRECCIA		32	0.0559	1.69						0.0632	0.22	34.3	0.04	0.34								0.7	500	5		7				5
D169303		USGS		Geochemistry of rock samples from the National Geochemical Database: U.S. Geological Survey, Reston, VA.	U.S. Geological Survey	USGS		47.25	-109.375	0.01	68	68	68	UNKNOWN	SEDIMENTARY	UNKNOWN	UNKNOWN	BRECCIA		15	0.0394	1.38						0.161	0.54	44.7	0.03	0.34							7	0.5	1000	7		1.5				2
D169304		USGS		Geochemistry of rock samples from the National Geochemical Database: U.S. Geological Survey, Reston, VA.	U.S. Geological Survey	USGS		47.25	-109.375	0.01	68	68	68	UNKNOWN	SEDIMENTARY	UNKNOWN	UNKNOWN	BRECCIA		12.6	0.0388	1						0.164	0.29	48	0.03	0.25							7	0.5	1000	3		3				1.5
D169305		USGS		Geochemistry of rock samples from the National Geochemical Database: U.S. Geological Survey, Reston, VA.	U.S. Geological Survey	USGS		47.25	-109.375	0.01	68	68	68	UNKNOWN	SEDIMENTARY	UNKNOWN	UNKNOWN	BRECCIA		25.5	0.121	1.56						0.102	0.36	40	0.03	0.5								0.2	700			2				2
D169306		USGS		Geochemistry of rock samples from the National Geochemical Database: U.S. Geological Survey, Reston, VA.	U.S. Geological Survey	USGS		47.25	-109.375	0.01	68	68	68	UNKNOWN	SEDIMENTARY	UNKNOWN	UNKNOWN	BRECCIA		4.07		1.15							0.47	56.2	0.04	0.12							1	0.1	150			1
D169307		USGS		Geochemistry of rock samples from the National Geochemical Database: U.S. Geological Survey, Reston, VA.	U.S. Geological Survey	USGS		47.25	-109.375	0.01	68	68	68	UNKNOWN	SEDIMENTARY	UNKNOWN	UNKNOWN	BRECCIA		47.1		0.555						0.114	0.1	29.4	0.03	0.12								1.5	1000	7		10				2
D169308		USGS		Geochemistry of rock samples from the National Geochemical Database: U.S. Geological Survey, Reston, VA.	U.S. Geological Survey	USGS		47.25	-109.375	0.01	68	68	68	UNKNOWN	SEDIMENTARY	UNKNOWN	UNKNOWN	BRECCIA		7.45	0.0338	1.52						0.112	0.39	52.8	0.03	0.3							3	1	1000	7		3				1
D169309		USGS		Geochemistry of rock samples from the National Geochemical Database: U.S. Geological Survey, Reston, VA.	U.S. Geological Survey	USGS		47.25	-109.375	0.01	68	68	68	UNKNOWN	SEDIMENTARY	UNKNOWN	UNKNOWN	BRECCIA		9.45	0.0206	0.789						0.167	0.28	51.4	0.03	0.24							3	0.2	1500	5		10				7
D169310		USGS		Geochemistry of rock samples from the National Geochemical Database: U.S. Geological Survey, Reston, VA.	U.S. Geological Survey	USGS		47.25	-109.375	0.01	68	68	68	UNKNOWN	SEDIMENTARY	UNKNOWN	UNKNOWN	BRECCIA		9.25		0.701						0.189	0.25	51.9	0.02	0.21							3	0.2	1500	5		3				7
D169311		USGS		Geochemistry of rock samples from the National Geochemical Database: U.S. Geological Survey, Reston, VA.	U.S. Geological Survey	USGS		47.25	-109.375	0.01	68	68	68	UNKNOWN	SEDIMENTARY	UNKNOWN	UNKNOWN	BRECCIA		6.85								0.207	0.25	54.4	0.02	0.15							3	0.15	1500		3	5				10
D169312		USGS		Geochemistry of rock samples from the National Geochemical Database: U.S. Geological Survey, Reston, VA.	U.S. Geological Survey	USGS		47.25	-109.375	0.01	68	68	68	UNKNOWN	SEDIMENTARY	UNKNOWN	UNKNOWN	BRECCIA		19.2	0.0206	0.409						0.123	0.2	45.3	0.03	0.16							7	0.7	1000	5	3	3				0.7
D169313		USGS		Geochemistry of rock samples from the National Geochemical Database: U.S. Geological Survey, Reston, VA.	U.S. Geological Survey	USGS		47.25	-109.375	0.01	68	68	68	UNKNOWN	SEDIMENTARY	UNKNOWN	UNKNOWN	BRECCIA		3.05		0.232							0.48	56.8	0.04	0.12							1	0.7	100			1
D169314		USGS		Geochemistry of rock samples from the National Geochemical Database: U.S. Geological Survey, Reston, VA.	U.S. Geological Survey	USGS		47.25	-109.375	0.01	68	68	68	UNKNOWN	SEDIMENTARY	UNKNOWN	UNKNOWN	BRECCIA		3.19		0.311						0.0439	0.26	58.3	0.02	0.04							1	0.2	700			1
D169315		USGS		Geochemistry of rock samples from the National Geochemical Database: U.S. Geological Survey, Reston, VA.	U.S. Geological Survey	USGS		47.25	-109.375	0.01	68	68	68	UNKNOWN	SEDIMENTARY	UNKNOWN	UNKNOWN	BRECCIA		10.5		0.491						0.157	0.21	51.9	0.02	0.08							5	0.1	1000	3		1.5				0.7
D169316		USGS		Geochemistry of rock samples from the National Geochemical Database: U.S. Geological Survey, Reston, VA.	U.S. Geological Survey	USGS		47.25	-109.375	0.01	68	68	68	UNKNOWN	SEDIMENTARY	UNKNOWN	UNKNOWN	BRECCIA		2.13		0.311						0.0742	0.31	58.5	0.03	0.09							0.7	0.2	700							2
D169317		USGS		Geochemistry of rock samples from the National Geochemical Database: U.S. Geological Survey, Reston, VA.	U.S. Geological Survey	USGS		47.25	-109.375	0.01	68	68	68	UNKNOWN	SEDIMENTARY	UNKNOWN	UNKNOWN	BRECCIA		5.29								0.186	0.29	56.1	0.02	0.11							2	0.2	1500			1.5				1.5
D169318		USGS		Geochemistry of rock samples from the National Geochemical Database: U.S. Geological Survey, Reston, VA.	U.S. Geological Survey	USGS		47.25	-109.375	0.01	68	68	68	UNKNOWN	SEDIMENTARY	UNKNOWN	UNKNOWN	BRECCIA		11.2	0.0296	1.11						0.158	0.3	49.6	0.03	0.36							5	0.5	1000	10		3				1.5
D169319		USGS		Geochemistry of rock samples from the National Geochemical Database: U.S. Geological Survey, Reston, VA.	U.S. Geological Survey	USGS		47.25	-109.375	0.01	68	68	68	UNKNOWN	SEDIMENTARY	UNKNOWN	UNKNOWN	BRECCIA		2.29								0.202	1.09	57.2	0.02	0.05							1	0.2	1500			1
D169320		USGS		Geochemistry of rock samples from the National Geochemical Database: U.S. Geological Survey, Reston, VA.	U.S. Geological Survey	USGS		47.25	-109.375	0.01	68	68	68	UNKNOWN	SEDIMENTARY	UNKNOWN	UNKNOWN	BRECCIA		14.8	0.0264	0.338						0.12	0.24	48.5	0.03	0.22							7	1	700	7		7				1.5
D169321		USGS		Geochemistry of rock samples from the National Geochemical Database: U.S. Geological Survey, Reston, VA.	U.S. Geological Survey	USGS		47.25	-109.375	0.01	68	68	68	UNKNOWN	SEDIMENTARY	UNKNOWN	UNKNOWN	BRECCIA		12.7								0.134	0.18	50.9	0.02	0.1							7	0.5	1000			3
D169322		USGS		Geochemistry of rock samples from the National Geochemical Database: U.S. Geological Survey, Reston, VA.	U.S. Geological Survey	USGS		47.25	-109.375	0.01	68	68	68	UNKNOWN	SEDIMENTARY	UNKNOWN	UNKNOWN	BRECCIA		47.2	0.121	3.43						0.0512	0.35	24.3	0.05	0.77								1	500	15	3	15				5
D169323		USGS		Geochemistry of rock samples from the National Geochemical Database: U.S. Geological Survey, Reston, VA.	U.S. Geological Survey	USGS		47.25	-109.375	0.01	68	68	68	UNKNOWN	SEDIMENTARY	UNKNOWN	UNKNOWN	BRECCIA		2.17								0.199	0.45	56.1	0.02	0.06							0.5	0.2	1500			1
D169324		USGS		Geochemistry of rock samples from the National Geochemical Database: U.S. Geological Survey, Reston, VA.	U.S. Geological Survey	USGS		47.25	-109.375	0.01	68	68	68	UNKNOWN	SEDIMENTARY	UNKNOWN	UNKNOWN	BRECCIA		9.52								0.217	0.25	50	0.02	0.04							5	0.15	2000			1
D169325		USGS		Geochemistry of rock samples from the National Geochemical Database: U.S. Geological Survey, Reston, VA.	U.S. Geological Survey	USGS		47.25	-109.375	0.01	68	68	68	UNKNOWN	SEDIMENTARY	UNKNOWN	UNKNOWN	BRECCIA		7.44	0.0284	0.372						0.14	0.5	51.6	0.02	0.2							3	0.2	1000	5		1
D169326		USGS		Geochemistry of rock samples from the National Geochemical Database: U.S. Geological Survey, Reston, VA.	U.S. Geological Survey	USGS		47.25	-109.375	0.01	68	68	68	UNKNOWN	SEDIMENTARY	UNKNOWN	UNKNOWN	BRECCIA		13.3	0.0296	0.467						0.0971	0.21	47.3	0.02	0.16							7	1	700	10		20				7
D169327		USGS		Geochemistry of rock samples from the National Geochemical Database: U.S. Geological Survey, Reston, VA.	U.S. Geological Survey	USGS		47.25	-109.375	0.01	68	68	68	UNKNOWN	SEDIMENTARY	UNKNOWN	UNKNOWN	BRECCIA		17.5	0.0364	0.513						0.114	0.3	43.9	0.03	0.2							7	2	700	7		2				1
D169328		USGS		Geochemistry of rock samples from the National Geochemical Database: U.S. Geological Survey, Reston, VA.	U.S. Geological Survey	USGS		47.25	-109.375	0.01	68	68	68	UNKNOWN	SEDIMENTARY	UNKNOWN	UNKNOWN	BRECCIA		2.1		0.331							0.58	55.8	0.04	0.12							0.7	0.05	100
D169329		USGS		Geochemistry of rock samples from the National Geochemical Database: U.S. Geological Survey, Reston, VA.	U.S. Geological Survey	USGS		47.25	-109.375	0.01	68	68	68	UNKNOWN	SEDIMENTARY	UNKNOWN	UNKNOWN	BRECCIA		8.54	0.0477	0.784						0.106	0.41	51.3	0.03	0.36							3	0.5	1500	5		3				1.5
D169330		USGS		Geochemistry of rock samples from the National Geochemical Database: U.S. Geological Survey, Reston, VA.	U.S. Geological Survey	USGS		47.25	-109.375	0.01	68	68	68	UNKNOWN	SEDIMENTARY	UNKNOWN	UNKNOWN	BRECCIA		11	0.0311	0.733						0.149	0.31	50.7	0.02	0.19							5	0.2	1500			3				1.5
D169331		USGS		Geochemistry of rock samples from the National Geochemical Database: U.S. Geological Survey, Reston, VA.	U.S. Geological Survey	USGS		47.25	-109.375	0.01	68	68	68	UNKNOWN	SEDIMENTARY	UNKNOWN	UNKNOWN	BRECCIA		14.7		0.282						0.0862	0.21	48	0.02	0.09							7	0.7	1000			1.5				1.5
D169332		USGS		Geochemistry of rock samples from the National Geochemical Database: U.S. Geological Survey, Reston, VA.	U.S. Geological Survey	USGS		47.25	-109.375	0.01	68	68	68	UNKNOWN	SEDIMENTARY	UNKNOWN	UNKNOWN	BRECCIA		7.09		0.449						0.175	0.46	53.3	0.02	0.11							3	0.2	1500			1.5				1.5
D169333		USGS		Geochemistry of rock samples from the National Geochemical Database: U.S. Geological Survey, Reston, VA.	U.S. Geological Survey	USGS		47.25	-109.375	0.01	68	68	68	UNKNOWN	SEDIMENTARY	UNKNOWN	UNKNOWN	BRECCIA		13	0.0311	0.572						0.154	0.29	47.8	0.03	0.24							7	0.5	1500	3		5				1.5
D169334		USGS		Geochemistry of rock samples from the National Geochemical Database: U.S. Geological Survey, Reston, VA.	U.S. Geological Survey	USGS		47.25	-109.375	0.01	68	68	68	UNKNOWN	SEDIMENTARY	UNKNOWN	UNKNOWN	BRECCIA		31.4	0.0457	1.21						0.0672	0.23	36	0.04	0.35								0.7	700	5		10				7
D169335		USGS		Geochemistry of rock samples from the National Geochemical Database: U.S. Geological Survey, Reston, VA.	U.S. Geological Survey	USGS		47.25	-109.375	0.01	68	68	68	UNKNOWN	SEDIMENTARY	UNKNOWN	UNKNOWN	BRECCIA		2.95								0.0969	0.31	56.2	0.03	0.09							1.5	0.15	1000
D169336		USGS		Geochemistry of rock samples from the National Geochemical Database: U.S. Geological Survey, Reston, VA.	U.S. Geological Survey	USGS		47.25	-109.375	0.01	68	68	68	UNKNOWN	SEDIMENTARY	UNKNOWN	UNKNOWN	BRECCIA		11.6		0.326							0.33	49.8	0.03	0.08							5	0.1	300			2				1
D169337		USGS		Geochemistry of rock samples from the National Geochemical Database: U.S. Geological Survey, Reston, VA.	U.S. Geological Survey	USGS		47.25	-109.375	0.01	68	68	68	UNKNOWN	SEDIMENTARY	UNKNOWN	UNKNOWN	BRECCIA		7.34	0.0329	1.22						0.168	0.45	52.3	0.04	0.34							3	0.5	1500			3				1.5
D192443		USGS		Geochemistry of rock samples from the National Geochemical Database: U.S. Geological Survey, Reston, VA.	U.S. Geological Survey	USGS		47.125	-109.5	0.01	3	3	3	UNKNOWN	SEDIMENTARY	UNKNOWN	UNKNOWN	BRECCIA																						1.5	500	10		5
D192478		USGS		Geochemistry of rock samples from the National Geochemical Database: U.S. Geological Survey, Reston, VA.	U.S. Geological Survey	USGS		47.25	-109.375	0.01	3	3	3	UNKNOWN	SEDIMENTARY	UNKNOWN	UNKNOWN	BRECCIA																						2	700	7		30
D192479		USGS		Geochemistry of rock samples from the National Geochemical Database: U.S. Geological Survey, Reston, VA.	U.S. Geological Survey	USGS		47.25	-109.375	0.01	3	3	3	UNKNOWN	SEDIMENTARY	UNKNOWN	UNKNOWN	BRECCIA																						2	1000	5		70		300
D192483		USGS		Geochemistry of rock samples from the National Geochemical Database: U.S. Geological Survey, Reston, VA.	U.S. Geological Survey	USGS		47.25	-109.375	0.01	3	3	3	UNKNOWN	SEDIMENTARY	UNKNOWN	UNKNOWN	BRECCIA																						2	700			15
D192485		USGS		Geochemistry of rock samples from the National Geochemical Database: U.S. Geological Survey, Reston, VA.	U.S. Geological Survey	USGS		47.25	-109.375	0.01	3	3	3	UNKNOWN	SEDIMENTARY	UNKNOWN	UNKNOWN	BRECCIA																						2	700			20
D192487		USGS		Geochemistry of rock samples from the National Geochemical Database: U.S. Geological Survey, Reston, VA.	U.S. Geological Survey	USGS		47.25	-109.375	0.01	3	3	3	UNKNOWN	SEDIMENTARY	UNKNOWN	UNKNOWN	BRECCIA																						1.5	150			7
D192488		USGS		Geochemistry of rock samples from the National Geochemical Database: U.S. Geological Survey, Reston, VA.	U.S. Geological Survey	USGS		47.25	-109.375	0.01	3	3	3	UNKNOWN	SEDIMENTARY	UNKNOWN	UNKNOWN	BRECCIA																						2	1000	5		20
D192489		USGS		Geochemistry of rock samples from the National Geochemical Database: U.S. Geological Survey, Reston, VA.	U.S. Geological Survey	USGS		47.25	-109.375	0.01	3	3	3	UNKNOWN	SEDIMENTARY	UNKNOWN	UNKNOWN	BRECCIA																						2	500			15
D192490		USGS		Geochemistry of rock samples from the National Geochemical Database: U.S. Geological Survey, Reston, VA.	U.S. Geological Survey	USGS		47.25	-109.375	0.01	3	3	3	UNKNOWN	SEDIMENTARY	UNKNOWN	UNKNOWN	BRECCIA																						2	700			20
D192497		USGS		Geochemistry of rock samples from the National Geochemical Database: U.S. Geological Survey, Reston, VA.	U.S. Geological Survey	USGS		47.25	-109.375	0.01	3	3	3	UNKNOWN	SEDIMENTARY	UNKNOWN	UNKNOWN	BRECCIA																						3	1000	15	5	30
D192500		USGS		Geochemistry of rock samples from the National Geochemical Database: U.S. Geological Survey, Reston, VA.	U.S. Geological Survey	USGS		47.25	-109.375	0.01	3	3	3	UNKNOWN	SEDIMENTARY	UNKNOWN	UNKNOWN	BRECCIA																						1.5	500			3
D192501		USGS		Geochemistry of rock samples from the National Geochemical Database: U.S. Geological Survey, Reston, VA.	U.S. Geological Survey	USGS		47.25	-109.375	0.01	3	3	3	UNKNOWN	SEDIMENTARY	UNKNOWN	UNKNOWN	BRECCIA																						3	150			15
D192502		USGS		Geochemistry of rock samples from the National Geochemical Database: U.S. Geological Survey, Reston, VA.	U.S. Geological Survey	USGS		47.25	-109.375	0.01	3	3	3	UNKNOWN	SEDIMENTARY	UNKNOWN	UNKNOWN	BRECCIA																						2	300			10
D192503		USGS		Geochemistry of rock samples from the National Geochemical Database: U.S. Geological Survey, Reston, VA.	U.S. Geological Survey	USGS		47.25	-109.375	0.01	3	3	3	UNKNOWN	SEDIMENTARY	UNKNOWN	UNKNOWN	BRECCIA																						3	1000	7		15
D192506		USGS		Geochemistry of rock samples from the National Geochemical Database: U.S. Geological Survey, Reston, VA.	U.S. Geological Survey	USGS		47.25	-109.375	0.01	3	3	3	UNKNOWN	SEDIMENTARY	UNKNOWN	UNKNOWN	BRECCIA																						1.5	700			15
D209756		USGS		Geochemistry of rock samples from the National Geochemical Database: U.S. Geological Survey, Reston, VA.	U.S. Geological Survey	USGS		47.1333	-109.367	0.01	3	3	3	UNKNOWN	SEDIMENTARY	UNKNOWN	UNKNOWN	BRECCIA																						2	700	5		3
D209757		USGS		Geochemistry of rock samples from the National Geochemical Database: U.S. Geological Survey, Reston, VA.	U.S. Geological Survey	USGS		47.1333	-109.367	0.01	3	3	3	UNKNOWN	SEDIMENTARY	UNKNOWN	UNKNOWN	BRECCIA																						2	700	7	3	10
D209759		USGS		Geochemistry of rock samples from the National Geochemical Database: U.S. Geological Survey, Reston, VA.	U.S. Geological Survey	USGS		47.1333	-109.367	0.01	3	3	3	UNKNOWN	SEDIMENTARY	UNKNOWN	UNKNOWN	BRECCIA																						2	700	3		7
D209760		USGS		Geochemistry of rock samples from the National Geochemical Database: U.S. Geological Survey, Reston, VA.	U.S. Geological Survey	USGS		47.1333	-109.367	0.01	3	3	3	UNKNOWN	SEDIMENTARY	UNKNOWN	UNKNOWN	BRECCIA																						1.5	700	3		7
D209761		USGS		Geochemistry of rock samples from the National Geochemical Database: U.S. Geological Survey, Reston, VA.	U.S. Geological Survey	USGS		47.1333	-109.367	0.01	3	3	3	UNKNOWN	SEDIMENTARY	UNKNOWN	UNKNOWN	BRECCIA																						2	700	3		5
D209765		USGS		Geochemistry of rock samples from the National Geochemical Database: U.S. Geological Survey, Reston, VA.	U.S. Geological Survey	USGS		47.1333	-109.367	0.01	3	3	3	UNKNOWN	SEDIMENTARY	UNKNOWN	UNKNOWN	BRECCIA																						1	300	3		2			1000
D209768		USGS		Geochemistry of rock samples from the National Geochemical Database: U.S. Geological Survey, Reston, VA.	U.S. Geological Survey	USGS		47.1333	-109.367	0.01	3	3	3	UNKNOWN	SEDIMENTARY	UNKNOWN	UNKNOWN	BRECCIA																						1.5	700	5		5
D209770		USGS		Geochemistry of rock samples from the National Geochemical Database: U.S. Geological Survey, Reston, VA.	U.S. Geological Survey	USGS		47.1333	-109.367	0.01	3	3	3	UNKNOWN	SEDIMENTARY	UNKNOWN	UNKNOWN	BRECCIA																						1.5	700	5	3	5
D209771		USGS		Geochemistry of rock samples from the National Geochemical Database: U.S. Geological Survey, Reston, VA.	U.S. Geological Survey	USGS		47.1333	-109.367	0.01	3	3	3	UNKNOWN	SEDIMENTARY	UNKNOWN	UNKNOWN	BRECCIA																						1.5	700	7	3	7
D209772		USGS		Geochemistry of rock samples from the National Geochemical Database: U.S. Geological Survey, Reston, VA.	U.S. Geological Survey	USGS		47.1333	-109.367	0.01	3	3	3	UNKNOWN	SEDIMENTARY	UNKNOWN	UNKNOWN	BRECCIA																						1.5	700	3	3	5
D209773		USGS		Geochemistry of rock samples from the National Geochemical Database: U.S. Geological Survey, Reston, VA.	U.S. Geological Survey	USGS		47.1333	-109.367	0.01	3	3	3	UNKNOWN	SEDIMENTARY	UNKNOWN	UNKNOWN	BRECCIA																						3	700	15	7	3
D209774		USGS		Geochemistry of rock samples from the National Geochemical Database: U.S. Geological Survey, Reston, VA.	U.S. Geological Survey	USGS		47.1333	-109.367	0.01	3	3	3	UNKNOWN	SEDIMENTARY	UNKNOWN	UNKNOWN	BRECCIA																						1.5	500			7
D209775		USGS		Geochemistry of rock samples from the National Geochemical Database: U.S. Geological Survey, Reston, VA.	U.S. Geological Survey	USGS		47.1333	-109.367	0.01	3	3	3	UNKNOWN	SEDIMENTARY	UNKNOWN	UNKNOWN	BRECCIA																						1.5	700	3	3	7
D209776		USGS		Geochemistry of rock samples from the National Geochemical Database: U.S. Geological Survey, Reston, VA.	U.S. Geological Survey	USGS		47.1333	-109.367	0.01	3	3	3	UNKNOWN	SEDIMENTARY	UNKNOWN	UNKNOWN	BRECCIA																						1.5	700	5	3	20
D209777		USGS		Geochemistry of rock samples from the National Geochemical Database: U.S. Geological Survey, Reston, VA.	U.S. Geological Survey	USGS		47.2167	-109.208	0.01	3	3	3	UNKNOWN	SEDIMENTARY	UNKNOWN	UNKNOWN	BRECCIA																						1.5	50			700
D209778		USGS		Geochemistry of rock samples from the National Geochemical Database: U.S. Geological Survey, Reston, VA.	U.S. Geological Survey	USGS		47.2167	-109.208	0.01	3	3	3	UNKNOWN	SEDIMENTARY	UNKNOWN	UNKNOWN	BRECCIA																						1.5	15			150
D209780		USGS		Geochemistry of rock samples from the National Geochemical Database: U.S. Geological Survey, Reston, VA.	U.S. Geological Survey	USGS		47.2167	-109.208	0.01	3	3	3	UNKNOWN	SEDIMENTARY	UNKNOWN	UNKNOWN	BRECCIA																						1.5	70			30
D209781		USGS		Geochemistry of rock samples from the National Geochemical Database: U.S. Geological Survey, Reston, VA.	U.S. Geological Survey	USGS		47.2167	-109.208	0.01	3	3	3	UNKNOWN	SEDIMENTARY	UNKNOWN	UNKNOWN	BRECCIA																						0.3	30			15
D209785		USGS		Geochemistry of rock samples from the National Geochemical Database: U.S. Geological Survey, Reston, VA.	U.S. Geological Survey	USGS		47.2167	-109.208	0.01	3	3	3	UNKNOWN	SEDIMENTARY	UNKNOWN	UNKNOWN	BRECCIA																						0.5	15			10
D209786		USGS		Geochemistry of rock samples from the National Geochemical Database: U.S. Geological Survey, Reston, VA.	U.S. Geological Survey	USGS		47.2167	-109.208	0.01	3	3	3	UNKNOWN	SEDIMENTARY	UNKNOWN	UNKNOWN	BRECCIA																						1	15			30
D209787		USGS		Geochemistry of rock samples from the National Geochemical Database: U.S. Geological Survey, Reston, VA.	U.S. Geological Survey	USGS		47.2167	-109.208	0.01	3	3	3	UNKNOWN	SEDIMENTARY	UNKNOWN	UNKNOWN	BRECCIA																						0.5	30			7
D209790		USGS		Geochemistry of rock samples from the National Geochemical Database: U.S. Geological Survey, Reston, VA.	U.S. Geological Survey	USGS		47.2167	-109.208	0.01	3	3	3	UNKNOWN	SEDIMENTARY	UNKNOWN	UNKNOWN	BRECCIA																							15			150
D209792		USGS		Geochemistry of rock samples from the National Geochemical Database: U.S. Geological Survey, Reston, VA.	U.S. Geological Survey	USGS		47.2167	-109.208	0.01	3	3	3	UNKNOWN	SEDIMENTARY	UNKNOWN	UNKNOWN	BRECCIA																						2	20			20
D209793		USGS		Geochemistry of rock samples from the National Geochemical Database: U.S. Geological Survey, Reston, VA.	U.S. Geological Survey	USGS		47.2167	-109.208	0.01	3	3	3	UNKNOWN	SEDIMENTARY	UNKNOWN	UNKNOWN	BRECCIA																						3	50			30
D209794		USGS		Geochemistry of rock samples from the National Geochemical Database: U.S. Geological Survey, Reston, VA.	U.S. Geological Survey	USGS		47.2167	-109.208	0.01	3	3	3	UNKNOWN	SEDIMENTARY	UNKNOWN	UNKNOWN	BRECCIA																						2	30			15
D209796		USGS		Geochemistry of rock samples from the National Geochemical Database: U.S. Geological Survey, Reston, VA.	U.S. Geological Survey	USGS		47.2167	-109.208	0.01	3	3	3	UNKNOWN	SEDIMENTARY	UNKNOWN	UNKNOWN	BRECCIA																						1.5	15			20
D209797		USGS		Geochemistry of rock samples from the National Geochemical Database: U.S. Geological Survey, Reston, VA.	U.S. Geological Survey	USGS		47.2167	-109.208	0.01	3	3	3	UNKNOWN	SEDIMENTARY	UNKNOWN	UNKNOWN	BRECCIA																						0.5	15			10
D209798		USGS		Geochemistry of rock samples from the National Geochemical Database: U.S. Geological Survey, Reston, VA.	U.S. Geological Survey	USGS		47.2167	-109.208	0.01	3	3	3	UNKNOWN	SEDIMENTARY	UNKNOWN	UNKNOWN	BRECCIA																						0.15	15			10
D209799		USGS		Geochemistry of rock samples from the National Geochemical Database: U.S. Geological Survey, Reston, VA.	U.S. Geological Survey	USGS		47.2167	-109.208	0.01	3	3	3	UNKNOWN	SEDIMENTARY	UNKNOWN	UNKNOWN	BRECCIA																						1.5	15			70
D209802		USGS		Geochemistry of rock samples from the National Geochemical Database: U.S. Geological Survey, Reston, VA.	U.S. Geological Survey	USGS		47.2167	-109.208	0.01	3	3	3	UNKNOWN	SEDIMENTARY	UNKNOWN	UNKNOWN	BRECCIA																						5	15			30
D209803		USGS		Geochemistry of rock samples from the National Geochemical Database: U.S. Geological Survey, Reston, VA.	U.S. Geological Survey	USGS		47.2167	-109.208	0.01	3	3	3	UNKNOWN	SEDIMENTARY	UNKNOWN	UNKNOWN	BRECCIA																						0.7	20			20
D209805		USGS		Geochemistry of rock samples from the National Geochemical Database: U.S. Geological Survey, Reston, VA.	U.S. Geological Survey	USGS		47.2167	-109.208	0.01	3	3	3	UNKNOWN	SEDIMENTARY	UNKNOWN	UNKNOWN	BRECCIA																						0.7	10			20
D209808		USGS		Geochemistry of rock samples from the National Geochemical Database: U.S. Geological Survey, Reston, VA.	U.S. Geological Survey	USGS		47.2167	-109.208	0.01	3	3	3	UNKNOWN	SEDIMENTARY	UNKNOWN	UNKNOWN	BRECCIA																						2	7			30
D209809		USGS		Geochemistry of rock samples from the National Geochemical Database: U.S. Geological Survey, Reston, VA.	U.S. Geological Survey	USGS		47.2167	-109.208	0.01	3	3	3	UNKNOWN	SEDIMENTARY	UNKNOWN	UNKNOWN	BRECCIA																						3	15			50
D209811		USGS		Geochemistry of rock samples from the National Geochemical Database: U.S. Geological Survey, Reston, VA.	U.S. Geological Survey	USGS		47.2167	-109.208	0.01	3	3	3	UNKNOWN	SEDIMENTARY	UNKNOWN	UNKNOWN	BRECCIA																						1	30			30
D210908		USGS		Geochemistry of rock samples from the National Geochemical Database: U.S. Geological Survey, Reston, VA.	U.S. Geological Survey	USGS		65.5833	-153.95	0.01	65	65	65	DNAA	SEDIMENTARY	UNKNOWN	UNKNOWN	BRECCIA
D214609		USGS		Geochemistry of rock samples from the National Geochemical Database: U.S. Geological Survey, Reston, VA.	U.S. Geological Survey	USGS		38.9333	-111.8	0.01	22	22	22	UNKNOWN	SEDIMENTARY	UNKNOWN	UNKNOWN	BRECCIA																							280	12	9.4	4.2
D215916		USGS		Geochemistry of rock samples from the National Geochemical Database: U.S. Geological Survey, Reston, VA.	U.S. Geological Survey	USGS		39.6356	-105.278	0.01	66	66	66	UNKNOWN	SEDIMENTARY	UNKNOWN	UNKNOWN	BRECCIA																					36	1.2		3.9		1.1
D225952		USGS		Geochemistry of rock samples from the National Geochemical Database: U.S. Geological Survey, Reston, VA.	U.S. Geological Survey	USGS		56.3617	-132.665	0.01	44	44	44	DNAA	SEDIMENTARY	UNKNOWN	UNKNOWN	BRECCIA
D226073		USGS		Geochemistry of rock samples from the National Geochemical Database: U.S. Geological Survey, Reston, VA.	U.S. Geological Survey	USGS		56.2633	-133.112	0.01	73	73	73	DNAA	SEDIMENTARY	UNKNOWN	UNKNOWN	BRECCIA
D226100		USGS		Geochemistry of rock samples from the National Geochemical Database: U.S. Geological Survey, Reston, VA.	U.S. Geological Survey	USGS		56.5614	-132.967	0.01	43	43	43	DNAA	SEDIMENTARY	UNKNOWN	UNKNOWN	BRECCIA
D226172		USGS		Geochemistry of rock samples from the National Geochemical Database: U.S. Geological Survey, Reston, VA.	U.S. Geological Survey	USGS		56.6097	-133.882	0.01	3	3	3	DNAA	SEDIMENTARY	UNKNOWN	UNKNOWN	BRECCIA
D226174		USGS		Geochemistry of rock samples from the National Geochemical Database: U.S. Geological Survey, Reston, VA.	U.S. Geological Survey	USGS		56.8836	-133.794	0.01	3	3	3	DNAA	SEDIMENTARY	UNKNOWN	UNKNOWN	BRECCIA
D226180		USGS		Geochemistry of rock samples from the National Geochemical Database: U.S. Geological Survey, Reston, VA.	U.S. Geological Survey	USGS		56.5586	-133.777	0.01	3	3	3	DNAA	SEDIMENTARY	UNKNOWN	UNKNOWN	BRECCIA
D226260		USGS		Geochemistry of rock samples from the National Geochemical Database: U.S. Geological Survey, Reston, VA.	U.S. Geological Survey	USGS		56.2958	-133.376	0.01	43	43	43	DNAA	SEDIMENTARY	UNKNOWN	UNKNOWN	BRECCIA
D226348		USGS		Geochemistry of rock samples from the National Geochemical Database: U.S. Geological Survey, Reston, VA.	U.S. Geological Survey	USGS		56.4028	-133.781	0.01	43	43	43	DNAA	SEDIMENTARY	UNKNOWN	UNKNOWN	BRECCIA
D241189		USGS		Geochemistry of rock samples from the National Geochemical Database: U.S. Geological Survey, Reston, VA.	U.S. Geological Survey	USGS		34.8728	-119.207	0.01				DNAA	SEDIMENTARY	UNKNOWN	UNKNOWN	BRECCIA
D241190		USGS		Geochemistry of rock samples from the National Geochemical Database: U.S. Geological Survey, Reston, VA.	U.S. Geological Survey	USGS		34.8714	-119.209	0.01				DNAA	SEDIMENTARY	UNKNOWN	UNKNOWN	BRECCIA
D265805		USGS		Geochemistry of rock samples from the National Geochemical Database: U.S. Geological Survey, Reston, VA.	U.S. Geological Survey	USGS		46.2833	-113.417	0.01	72	72	72	ICPAES	SEDIMENTARY	UNKNOWN	UNKNOWN	BRECCIA																						2.2	730	14	9	49		41	100
D277046		USGS		Geochemistry of rock samples from the National Geochemical Database: U.S. Geological Survey, Reston, VA.	U.S. Geological Survey	USGS		40.8336	-117.526	0.01	3	35	67	AAS	SEDIMENTARY	UNKNOWN	UNKNOWN	BRECCIA
D277046		USGS		Geochemistry of rock samples from the National Geochemical Database: U.S. Geological Survey, Reston, VA.	U.S. Geological Survey	USGS		40.8336	-117.526	0.01	3	35	67	ICPAES	SEDIMENTARY	UNKNOWN	UNKNOWN	BRECCIA																						4.4	560	2200	77	78		50	190
D277046		USGS		Geochemistry of rock samples from the National Geochemical Database: U.S. Geological Survey, Reston, VA.	U.S. Geological Survey	USGS		40.8336	-117.526	0.01	3	35	67	NAA	SEDIMENTARY	UNKNOWN	UNKNOWN	BRECCIA																						4.4		1880	70.6			68.4
D277049		USGS		Geochemistry of rock samples from the National Geochemical Database: U.S. Geological Survey, Reston, VA.	U.S. Geological Survey	USGS		40.8342	-117.526	0.01	3	35	67	AAS	SEDIMENTARY	UNKNOWN	UNKNOWN	BRECCIA
D277049		USGS		Geochemistry of rock samples from the National Geochemical Database: U.S. Geological Survey, Reston, VA.	U.S. Geological Survey	USGS		40.8342	-117.526	0.01	3	35	67	ICPAES	SEDIMENTARY	UNKNOWN	UNKNOWN	BRECCIA																						3.6	710	1300	50			57	60
D277049		USGS		Geochemistry of rock samples from the National Geochemical Database: U.S. Geological Survey, Reston, VA.	U.S. Geological Survey	USGS		40.8342	-117.526	0.01	3	35	67	ISE	SEDIMENTARY	UNKNOWN	UNKNOWN	BRECCIA
D277049		USGS		Geochemistry of rock samples from the National Geochemical Database: U.S. Geological Survey, Reston, VA.	U.S. Geological Survey	USGS		40.8342	-117.526	0.01	3	35	67	NAA	SEDIMENTARY	UNKNOWN	UNKNOWN	BRECCIA																						3.56		1120	44.5			60.6
D277060		USGS		Geochemistry of rock samples from the National Geochemical Database: U.S. Geological Survey, Reston, VA.	U.S. Geological Survey	USGS		40.8317	-117.523	0.01	3	35	67	AAS	SEDIMENTARY	UNKNOWN	UNKNOWN	BRECCIA
D277060		USGS		Geochemistry of rock samples from the National Geochemical Database: U.S. Geological Survey, Reston, VA.	U.S. Geological Survey	USGS		40.8317	-117.523	0.01	3	35	67	ICPAES	SEDIMENTARY	UNKNOWN	UNKNOWN	BRECCIA																						6.2	81000	260	60	83	410	9700	4600	130
D277060		USGS		Geochemistry of rock samples from the National Geochemical Database: U.S. Geological Survey, Reston, VA.	U.S. Geological Survey	USGS		40.8317	-117.523	0.01	3	35	67	ISE	SEDIMENTARY	UNKNOWN	UNKNOWN	BRECCIA
D277060		USGS		Geochemistry of rock samples from the National Geochemical Database: U.S. Geological Survey, Reston, VA.	U.S. Geological Survey	USGS		40.8317	-117.523	0.01	3	35	67	NAA	SEDIMENTARY	UNKNOWN	UNKNOWN	BRECCIA																						6.09		211	51			9770
D277063		USGS		Geochemistry of rock samples from the National Geochemical Database: U.S. Geological Survey, Reston, VA.	U.S. Geological Survey	USGS		40.8319	-117.522	0.01	3	35	67	AAS	SEDIMENTARY	UNKNOWN	UNKNOWN	BRECCIA
D277063		USGS		Geochemistry of rock samples from the National Geochemical Database: U.S. Geological Survey, Reston, VA.	U.S. Geological Survey	USGS		40.8319	-117.522	0.01	3	35	67	ICPAES	SEDIMENTARY	UNKNOWN	UNKNOWN	BRECCIA																						4.6	80000	240	110	52	230	9700	1900	4
D277063		USGS		Geochemistry of rock samples from the National Geochemical Database: U.S. Geological Survey, Reston, VA.	U.S. Geological Survey	USGS		40.8319	-117.522	0.01	3	35	67	ISE	SEDIMENTARY	UNKNOWN	UNKNOWN	BRECCIA
D277063		USGS		Geochemistry of rock samples from the National Geochemical Database: U.S. Geological Survey, Reston, VA.	U.S. Geological Survey	USGS		40.8319	-117.522	0.01	3	35	67	NAA	SEDIMENTARY	UNKNOWN	UNKNOWN	BRECCIA																						4.62		202	97.2			10000
D278597		USGS		Geochemistry of rock samples from the National Geochemical Database: U.S. Geological Survey, Reston, VA.	U.S. Geological Survey	USGS		40.8039	-117.522	0.01	3	35	67	AAS	SEDIMENTARY	UNKNOWN	UNKNOWN	BRECCIA
D278597		USGS		Geochemistry of rock samples from the National Geochemical Database: U.S. Geological Survey, Reston, VA.	U.S. Geological Survey	USGS		40.8039	-117.522	0.01	3	35	67	ICPAES	SEDIMENTARY	UNKNOWN	UNKNOWN	BRECCIA																						1.2	230	11	4	13		38	100	52
D278597		USGS		Geochemistry of rock samples from the National Geochemical Database: U.S. Geological Survey, Reston, VA.	U.S. Geological Survey	USGS		40.8039	-117.522	0.01	3	35	67	ISE	SEDIMENTARY	UNKNOWN	UNKNOWN	BRECCIA
D278597		USGS		Geochemistry of rock samples from the National Geochemical Database: U.S. Geological Survey, Reston, VA.	U.S. Geological Survey	USGS		40.8039	-117.522	0.01	3	35	67	NAA	SEDIMENTARY	UNKNOWN	UNKNOWN	BRECCIA																						1.24		8.54	2.9			43.1
D278603		USGS		Geochemistry of rock samples from the National Geochemical Database: U.S. Geological Survey, Reston, VA.	U.S. Geological Survey	USGS		40.8	-117.525	0.01	3	35	67	AAS	SEDIMENTARY	UNKNOWN	UNKNOWN	BRECCIA
D278603		USGS		Geochemistry of rock samples from the National Geochemical Database: U.S. Geological Survey, Reston, VA.	U.S. Geological Survey	USGS		40.8	-117.525	0.01	3	35	67	ICPAES	SEDIMENTARY	UNKNOWN	UNKNOWN	BRECCIA																						34	940	240	48	23		690	840	10
D278603		USGS		Geochemistry of rock samples from the National Geochemical Database: U.S. Geological Survey, Reston, VA.	U.S. Geological Survey	USGS		40.8	-117.525	0.01	3	35	67	ISE	SEDIMENTARY	UNKNOWN	UNKNOWN	BRECCIA
D278603		USGS		Geochemistry of rock samples from the National Geochemical Database: U.S. Geological Survey, Reston, VA.	U.S. Geological Survey	USGS		40.8	-117.525	0.01	3	35	67	NAA	SEDIMENTARY	UNKNOWN	UNKNOWN	BRECCIA																						30.6		178	36.3			667
D283134		USGS		Geochemistry of rock samples from the National Geochemical Database: U.S. Geological Survey, Reston, VA.	U.S. Geological Survey	USGS		38.8039	-110.551	0.01	6	36	66	ES	SEDIMENTARY	UNKNOWN	UNKNOWN	BRECCIA																						2	5000	20		20
D283134		USGS		Geochemistry of rock samples from the National Geochemical Database: U.S. Geological Survey, Reston, VA.	U.S. Geological Survey	USGS		38.8039	-110.551	0.01	6	36	66	FLUOR	SEDIMENTARY	UNKNOWN	UNKNOWN	BRECCIA
D283134		USGS		Geochemistry of rock samples from the National Geochemical Database: U.S. Geological Survey, Reston, VA.	U.S. Geological Survey	USGS		38.8039	-110.551	0.01	6	36	66	UNKNOWN	SEDIMENTARY	UNKNOWN	UNKNOWN	BRECCIA																											7.8	170	130
D283239		USGS		Geochemistry of rock samples from the National Geochemical Database: U.S. Geological Survey, Reston, VA.	U.S. Geological Survey	USGS		35.85	-112.233	0.01				AAS	SEDIMENTARY	UNKNOWN	UNKNOWN	BRECCIA
D283239		USGS		Geochemistry of rock samples from the National Geochemical Database: U.S. Geological Survey, Reston, VA.	U.S. Geological Survey	USGS		35.85	-112.233	0.01				DNAA	SEDIMENTARY	UNKNOWN	UNKNOWN	BRECCIA
D283239		USGS		Geochemistry of rock samples from the National Geochemical Database: U.S. Geological Survey, Reston, VA.	U.S. Geological Survey	USGS		35.85	-112.233	0.01				ICPAES	SEDIMENTARY	UNKNOWN	UNKNOWN	BRECCIA																						1.7	210	16	11	73000		380	980
D283239		USGS		Geochemistry of rock samples from the National Geochemical Database: U.S. Geological Survey, Reston, VA.	U.S. Geological Survey	USGS		35.85	-112.233	0.01				ISE	SEDIMENTARY	UNKNOWN	UNKNOWN	BRECCIA
D283239		USGS		Geochemistry of rock samples from the National Geochemical Database: U.S. Geological Survey, Reston, VA.	U.S. Geological Survey	USGS		35.85	-112.233	0.01				NAA	SEDIMENTARY	UNKNOWN	UNKNOWN	BRECCIA																						1.62		8.75	10			393
D288360		USGS		Geochemistry of rock samples from the National Geochemical Database: U.S. Geological Survey, Reston, VA.	U.S. Geological Survey	USGS		39.4478	-114.166	0.01				ES	SEDIMENTARY	UNKNOWN	UNKNOWN	BRECCIA																						1.5	300	10		10
D288361		USGS		Geochemistry of rock samples from the National Geochemical Database: U.S. Geological Survey, Reston, VA.	U.S. Geological Survey	USGS		36.3067	-114.236	0.01				ES	SEDIMENTARY	UNKNOWN	UNKNOWN	BRECCIA																						0.15	500			5
D292302		USGS		Geochemistry of rock samples from the National Geochemical Database: U.S. Geological Survey, Reston, VA.	U.S. Geological Survey	USGS		60.0022	-160.133	0.01	3	3	3	ES	SEDIMENTARY	UNKNOWN	UNKNOWN	BRECCIA																						3	150	10	15	50
D292302		USGS		Geochemistry of rock samples from the National Geochemical Database: U.S. Geological Survey, Reston, VA.	U.S. Geological Survey	USGS		60.0022	-160.133	0.01	3	3	3	ICPAES	SEDIMENTARY	UNKNOWN	UNKNOWN	BRECCIA																												40
D306439		USGS		Geochemistry of rock samples from the National Geochemical Database: U.S. Geological Survey, Reston, VA.	U.S. Geological Survey	USGS		32.9328	-110.163	0.01	66	66	66	XRF	SEDIMENTARY	UNKNOWN	UNKNOWN	BRECCIA		74.2	0.17	11.5						0.05	0.15	2.54	5.6	1
D309970		USGS		Geochemistry of rock samples from the National Geochemical Database: U.S. Geological Survey, Reston, VA.	U.S. Geological Survey	USGS		60.1908	-159.737	0.01				ICPAES	SEDIMENTARY	UNKNOWN	UNKNOWN	BRECCIA																												13
D309970		USGS		Geochemistry of rock samples from the National Geochemical Database: U.S. Geological Survey, Reston, VA.	U.S. Geological Survey	USGS		60.1908	-159.737	0.01				ES	SEDIMENTARY	UNKNOWN	UNKNOWN	BRECCIA																						1.5	300
D309971		USGS		Geochemistry of rock samples from the National Geochemical Database: U.S. Geological Survey, Reston, VA.	U.S. Geological Survey	USGS		60.1908	-159.737	0.01				AAS	SEDIMENTARY	UNKNOWN	UNKNOWN	BRECCIA
D309971		USGS		Geochemistry of rock samples from the National Geochemical Database: U.S. Geological Survey, Reston, VA.	U.S. Geological Survey	USGS		60.1908	-159.737	0.01				ES	SEDIMENTARY	UNKNOWN	UNKNOWN	BRECCIA																						1	70
D309971		USGS		Geochemistry of rock samples from the National Geochemical Database: U.S. Geological Survey, Reston, VA.	U.S. Geological Survey	USGS		60.1908	-159.737	0.01				ICPAES	SEDIMENTARY	UNKNOWN	UNKNOWN	BRECCIA																												8
D315108		USGS		Geochemistry of rock samples from the National Geochemical Database: U.S. Geological Survey, Reston, VA.	U.S. Geological Survey	USGS		60.0022	-160.128	0.01				AAS	SEDIMENTARY	UNKNOWN	UNKNOWN	BRECCIA
D315108		USGS		Geochemistry of rock samples from the National Geochemical Database: U.S. Geological Survey, Reston, VA.	U.S. Geological Survey	USGS		60.0022	-160.128	0.01				ES	SEDIMENTARY	UNKNOWN	UNKNOWN	BRECCIA																						1.5	150			15
D315108		USGS		Geochemistry of rock samples from the National Geochemical Database: U.S. Geological Survey, Reston, VA.	U.S. Geological Survey	USGS		60.0022	-160.128	0.01				ICPAES	SEDIMENTARY	UNKNOWN	UNKNOWN	BRECCIA																											0.13	20
D315109		USGS		Geochemistry of rock samples from the National Geochemical Database: U.S. Geological Survey, Reston, VA.	U.S. Geological Survey	USGS		60.0022	-160.128	0.01				AAS	SEDIMENTARY	UNKNOWN	UNKNOWN	BRECCIA
D315109		USGS		Geochemistry of rock samples from the National Geochemical Database: U.S. Geological Survey, Reston, VA.	U.S. Geological Survey	USGS		60.0022	-160.128	0.01				ES	SEDIMENTARY	UNKNOWN	UNKNOWN	BRECCIA																						1.5	150	5		15
D315109		USGS		Geochemistry of rock samples from the National Geochemical Database: U.S. Geological Survey, Reston, VA.	U.S. Geological Survey	USGS		60.0022	-160.128	0.01				ICPAES	SEDIMENTARY	UNKNOWN	UNKNOWN	BRECCIA																											0.15
D315110		USGS		Geochemistry of rock samples from the National Geochemical Database: U.S. Geological Survey, Reston, VA.	U.S. Geological Survey	USGS		60.0022	-160.128	0.01				ES	SEDIMENTARY	UNKNOWN	UNKNOWN	BRECCIA																						1.5	300	7		15
D315110		USGS		Geochemistry of rock samples from the National Geochemical Database: U.S. Geological Survey, Reston, VA.	U.S. Geological Survey	USGS		60.0022	-160.128	0.01				ICPAES	SEDIMENTARY	UNKNOWN	UNKNOWN	BRECCIA																											0.12	19
D316839		USGS		Geochemistry of rock samples from the National Geochemical Database: U.S. Geological Survey, Reston, VA.	U.S. Geological Survey	USGS		43.6133	-73.2211	0.01				ES	SEDIMENTARY	UNKNOWN	UNKNOWN	BRECCIA																						1.5	500	10		15
D316839		USGS		Geochemistry of rock samples from the National Geochemical Database: U.S. Geological Survey, Reston, VA.	U.S. Geological Survey	USGS		43.6133	-73.2211	0.01				ICPAES	SEDIMENTARY	UNKNOWN	UNKNOWN	BRECCIA																											0.5	19
D316839		USGS		Geochemistry of rock samples from the National Geochemical Database: U.S. Geological Survey, Reston, VA.	U.S. Geological Survey	USGS		43.6133	-73.2211	0.01				XRF	SEDIMENTARY	UNKNOWN	UNKNOWN	BRECCIA		73.5	0.23	4.27						0.03	1.56	8.06	1.63	0.44	0.26
D333141		USGS		Geochemistry of rock samples from the National Geochemical Database: U.S. Geological Survey, Reston, VA.	U.S. Geological Survey	USGS		60.5711	-159.428	0.01	65	65	65	ES	SEDIMENTARY	UNKNOWN	UNKNOWN	BRECCIA																						20		200	100	7
D333141		USGS		Geochemistry of rock samples from the National Geochemical Database: U.S. Geological Survey, Reston, VA.	U.S. Geological Survey	USGS		60.5711	-159.428	0.01	65	65	65	ICPAES	SEDIMENTARY	UNKNOWN	UNKNOWN	BRECCIA																										7.5	0.3	220
D333142		USGS		Geochemistry of rock samples from the National Geochemical Database: U.S. Geological Survey, Reston, VA.	U.S. Geological Survey	USGS		60.5711	-159.428	0.01	65	65	65	ES	SEDIMENTARY	UNKNOWN	UNKNOWN	BRECCIA																						5	1000	50	30	7
D333142		USGS		Geochemistry of rock samples from the National Geochemical Database: U.S. Geological Survey, Reston, VA.	U.S. Geological Survey	USGS		60.5711	-159.428	0.01	65	65	65	ICPAES	SEDIMENTARY	UNKNOWN	UNKNOWN	BRECCIA																										5.8	0.07	18		0.049
D333145		USGS		Geochemistry of rock samples from the National Geochemical Database: U.S. Geological Survey, Reston, VA.	U.S. Geological Survey	USGS		60.3122	-159.281	0.01	65	65	65	AAS	SEDIMENTARY	UNKNOWN	UNKNOWN	BRECCIA
D333145		USGS		Geochemistry of rock samples from the National Geochemical Database: U.S. Geological Survey, Reston, VA.	U.S. Geological Survey	USGS		60.3122	-159.281	0.01	65	65	65	ES	SEDIMENTARY	UNKNOWN	UNKNOWN	BRECCIA																						3	1500	70	20	15
D333145		USGS		Geochemistry of rock samples from the National Geochemical Database: U.S. Geological Survey, Reston, VA.	U.S. Geological Survey	USGS		60.3122	-159.281	0.01	65	65	65	ICPAES	SEDIMENTARY	UNKNOWN	UNKNOWN	BRECCIA																										17	0.086	48	6.4
D333146		USGS		Geochemistry of rock samples from the National Geochemical Database: U.S. Geological Survey, Reston, VA.	U.S. Geological Survey	USGS		60.2972	-159.256	0.01	65	65	65	AAS	SEDIMENTARY	UNKNOWN	UNKNOWN	BRECCIA
D333146		USGS		Geochemistry of rock samples from the National Geochemical Database: U.S. Geological Survey, Reston, VA.	U.S. Geological Survey	USGS		60.2972	-159.256	0.01	65	65	65	ES	SEDIMENTARY	UNKNOWN	UNKNOWN	BRECCIA																						7	1500	70	30	30
D333146		USGS		Geochemistry of rock samples from the National Geochemical Database: U.S. Geological Survey, Reston, VA.	U.S. Geological Survey	USGS		60.2972	-159.256	0.01	65	65	65	ICPAES	SEDIMENTARY	UNKNOWN	UNKNOWN	BRECCIA																										16	0.085	71	5.6
D333394		USGS		Geochemistry of rock samples from the National Geochemical Database: U.S. Geological Survey, Reston, VA.	U.S. Geological Survey	USGS		40.0264	-112.059	0.01	68	68	68	ES	SEDIMENTARY	UNKNOWN	UNKNOWN	BRECCIA																							200	5
D333394		USGS		Geochemistry of rock samples from the National Geochemical Database: U.S. Geological Survey, Reston, VA.	U.S. Geological Survey	USGS		40.0264	-112.059	0.01	68	68	68	ICPAES	SEDIMENTARY	UNKNOWN	UNKNOWN	BRECCIA																											0.4	60
D333416		USGS		Geochemistry of rock samples from the National Geochemical Database: U.S. Geological Survey, Reston, VA.	U.S. Geological Survey	USGS		40.0483	-112.2	0.01	68	68	68	ES	SEDIMENTARY	UNKNOWN	UNKNOWN	BRECCIA																						1	20	7		20	20	1500		10
D333416		USGS		Geochemistry of rock samples from the National Geochemical Database: U.S. Geological Survey, Reston, VA.	U.S. Geological Survey	USGS		40.0483	-112.2	0.01	68	68	68	ICPAES	SEDIMENTARY	UNKNOWN	UNKNOWN	BRECCIA																											12.1	1450	66
D333424		USGS		Geochemistry of rock samples from the National Geochemical Database: U.S. Geological Survey, Reston, VA.	U.S. Geological Survey	USGS		40.0178	-112.17	0.01	67	67	67	ES	SEDIMENTARY	UNKNOWN	UNKNOWN	BRECCIA																						0.2	7000			30
D333424		USGS		Geochemistry of rock samples from the National Geochemical Database: U.S. Geological Survey, Reston, VA.	U.S. Geological Survey	USGS		40.0178	-112.17	0.01	67	67	67	ICPAES	SEDIMENTARY	UNKNOWN	UNKNOWN	BRECCIA																											0.1	11	35
D333430		USGS		Geochemistry of rock samples from the National Geochemical Database: U.S. Geological Survey, Reston, VA.	U.S. Geological Survey	USGS		40.025	-112.174	0.01	67	67	67	AAS	SEDIMENTARY	UNKNOWN	UNKNOWN	BRECCIA
D333430		USGS		Geochemistry of rock samples from the National Geochemical Database: U.S. Geological Survey, Reston, VA.	U.S. Geological Survey	USGS		40.025	-112.174	0.01	67	67	67	ES	SEDIMENTARY	UNKNOWN	UNKNOWN	BRECCIA																						0.3	2000	5		15
D333430		USGS		Geochemistry of rock samples from the National Geochemical Database: U.S. Geological Survey, Reston, VA.	U.S. Geological Survey	USGS		40.025	-112.174	0.01	67	67	67	ICPAES	SEDIMENTARY	UNKNOWN	UNKNOWN	BRECCIA																											0.4	20	67
D333431		USGS		Geochemistry of rock samples from the National Geochemical Database: U.S. Geological Survey, Reston, VA.	U.S. Geological Survey	USGS		40.025	-112.174	0.01	67	67	67	ES	SEDIMENTARY	UNKNOWN	UNKNOWN	BRECCIA																						0.3	100			7
D333431		USGS		Geochemistry of rock samples from the National Geochemical Database: U.S. Geological Survey, Reston, VA.	U.S. Geological Survey	USGS		40.025	-112.174	0.01	67	67	67	ICPAES	SEDIMENTARY	UNKNOWN	UNKNOWN	BRECCIA																											0.2	10	22
D333432		USGS		Geochemistry of rock samples from the National Geochemical Database: U.S. Geological Survey, Reston, VA.	U.S. Geological Survey	USGS		40.025	-112.174	0.01	67	67	67	ES	SEDIMENTARY	UNKNOWN	UNKNOWN	BRECCIA																						0.7	100	10		10
D333432		USGS		Geochemistry of rock samples from the National Geochemical Database: U.S. Geological Survey, Reston, VA.	U.S. Geological Survey	USGS		40.025	-112.174	0.01	67	67	67	ICPAES	SEDIMENTARY	UNKNOWN	UNKNOWN	BRECCIA																											0.3	7	30
D333434		USGS		Geochemistry of rock samples from the National Geochemical Database: U.S. Geological Survey, Reston, VA.	U.S. Geological Survey	USGS		40.0286	-112.186	0.01	69	69	69	ES	SEDIMENTARY	UNKNOWN	UNKNOWN	BRECCIA																						0.7	700			5
D333434		USGS		Geochemistry of rock samples from the National Geochemical Database: U.S. Geological Survey, Reston, VA.	U.S. Geological Survey	USGS		40.0286	-112.186	0.01	69	69	69	ICPAES	SEDIMENTARY	UNKNOWN	UNKNOWN	BRECCIA																											0.3	15	35
D333437		USGS		Geochemistry of rock samples from the National Geochemical Database: U.S. Geological Survey, Reston, VA.	U.S. Geological Survey	USGS		40.0339	-112.208	0.01	68	68	68	ES	SEDIMENTARY	UNKNOWN	UNKNOWN	BRECCIA																						1	500	10		7				0.5
D333437		USGS		Geochemistry of rock samples from the National Geochemical Database: U.S. Geological Survey, Reston, VA.	U.S. Geological Survey	USGS		40.0339	-112.208	0.01	68	68	68	ICPAES	SEDIMENTARY	UNKNOWN	UNKNOWN	BRECCIA																											1.9	53	96
D333440		USGS		Geochemistry of rock samples from the National Geochemical Database: U.S. Geological Survey, Reston, VA.	U.S. Geological Survey	USGS		40.0022	-112.216	0.01	68	68	68	ES	SEDIMENTARY	UNKNOWN	UNKNOWN	BRECCIA																						3	200	5		50	200			10
D333440		USGS		Geochemistry of rock samples from the National Geochemical Database: U.S. Geological Survey, Reston, VA.	U.S. Geological Survey	USGS		40.0022	-112.216	0.01	68	68	68	ICPAES	SEDIMENTARY	UNKNOWN	UNKNOWN	BRECCIA																											226
D333441		USGS		Geochemistry of rock samples from the National Geochemical Database: U.S. Geological Survey, Reston, VA.	U.S. Geological Survey	USGS		40.0022	-112.216	0.01	68	68	68	ES	SEDIMENTARY	UNKNOWN	UNKNOWN	BRECCIA																						5	200	7		50	200			20
D333441		USGS		Geochemistry of rock samples from the National Geochemical Database: U.S. Geological Survey, Reston, VA.	U.S. Geological Survey	USGS		40.0022	-112.216	0.01	68	68	68	ICPAES	SEDIMENTARY	UNKNOWN	UNKNOWN	BRECCIA																											240
D334068		USGS		Geochemistry of rock samples from the National Geochemical Database: U.S. Geological Survey, Reston, VA.	U.S. Geological Survey	USGS		60.1881	-159.9	0.01	65	65	65	AAS	SEDIMENTARY	UNKNOWN	UNKNOWN	BRECCIA
D334068		USGS		Geochemistry of rock samples from the National Geochemical Database: U.S. Geological Survey, Reston, VA.	U.S. Geological Survey	USGS		60.1881	-159.9	0.01	65	65	65	ES	SEDIMENTARY	UNKNOWN	UNKNOWN	BRECCIA																						3	1500	7		30
D334068		USGS		Geochemistry of rock samples from the National Geochemical Database: U.S. Geological Survey, Reston, VA.	U.S. Geological Survey	USGS		60.1881	-159.9	0.01	65	65	65	ICPAES	SEDIMENTARY	UNKNOWN	UNKNOWN	BRECCIA																										34	0.078	43	12
D334069		USGS		Geochemistry of rock samples from the National Geochemical Database: U.S. Geological Survey, Reston, VA.	U.S. Geological Survey	USGS		60.1597	-159.844	0.01	65	65	65	AAS	SEDIMENTARY	UNKNOWN	UNKNOWN	BRECCIA
D334069		USGS		Geochemistry of rock samples from the National Geochemical Database: U.S. Geological Survey, Reston, VA.	U.S. Geological Survey	USGS		60.1597	-159.844	0.01	65	65	65	ES	SEDIMENTARY	UNKNOWN	UNKNOWN	BRECCIA																						7	1500	30	30	70
D334069		USGS		Geochemistry of rock samples from the National Geochemical Database: U.S. Geological Survey, Reston, VA.	U.S. Geological Survey	USGS		60.1597	-159.844	0.01	65	65	65	ICPAES	SEDIMENTARY	UNKNOWN	UNKNOWN	BRECCIA																										48	0.092	68	2.6
D334646		USGS		Geochemistry of rock samples from the National Geochemical Database: U.S. Geological Survey, Reston, VA.	U.S. Geological Survey	USGS		45.0417	-113.862	0.01	72	72	72	ES	SEDIMENTARY	UNKNOWN	UNKNOWN	BRECCIA																						0.7	300			7
D334645		USGS		Geochemistry of rock samples from the National Geochemical Database: U.S. Geological Survey, Reston, VA.	U.S. Geological Survey	USGS		45.0417	-113.862	0.01	72	72	72	ES	SEDIMENTARY	UNKNOWN	UNKNOWN	BRECCIA																						5	200	15	10	20
D334645		USGS		Geochemistry of rock samples from the National Geochemical Database: U.S. Geological Survey, Reston, VA.	U.S. Geological Survey	USGS		45.0417	-113.862	0.01	72	72	72	ICPAES	SEDIMENTARY	UNKNOWN	UNKNOWN	BRECCIA																										0.4		6.7
D334646		USGS		Geochemistry of rock samples from the National Geochemical Database: U.S. Geological Survey, Reston, VA.	U.S. Geological Survey	USGS		45.0417	-113.862	0.01	72	72	72	ICPAES	SEDIMENTARY	UNKNOWN	UNKNOWN	BRECCIA																										0.83		2.7
D334649		USGS		Geochemistry of rock samples from the National Geochemical Database: U.S. Geological Survey, Reston, VA.	U.S. Geological Survey	USGS		45.0472	-113.854	0.01	72	72	72	ES	SEDIMENTARY	UNKNOWN	UNKNOWN	BRECCIA																						7	150	15		20
D334649		USGS		Geochemistry of rock samples from the National Geochemical Database: U.S. Geological Survey, Reston, VA.	U.S. Geological Survey	USGS		45.0472	-113.854	0.01	72	72	72	ICPAES	SEDIMENTARY	UNKNOWN	UNKNOWN	BRECCIA																										6.2		15	21
D334654		USGS		Geochemistry of rock samples from the National Geochemical Database: U.S. Geological Survey, Reston, VA.	U.S. Geological Survey	USGS		45.0519	-113.854	0.01	72	72	72	ES	SEDIMENTARY	UNKNOWN	UNKNOWN	BRECCIA																						10	100	5		300				7
D334654		USGS		Geochemistry of rock samples from the National Geochemical Database: U.S. Geological Survey, Reston, VA.	U.S. Geological Survey	USGS		45.0519	-113.854	0.01	72	72	72	ICPAES	SEDIMENTARY	UNKNOWN	UNKNOWN	BRECCIA																										180		14	17	0.52
D334673		USGS		Geochemistry of rock samples from the National Geochemical Database: U.S. Geological Survey, Reston, VA.	U.S. Geological Survey	USGS		44.9458	-113.765	0.01	72	72	72	ES	SEDIMENTARY	UNKNOWN	UNKNOWN	BRECCIA																						7	150	20	10	1000
D334673		USGS		Geochemistry of rock samples from the National Geochemical Database: U.S. Geological Survey, Reston, VA.	U.S. Geological Survey	USGS		44.9458	-113.765	0.01	72	72	72	ICPAES	SEDIMENTARY	UNKNOWN	UNKNOWN	BRECCIA																										520		10
D334700		USGS		Geochemistry of rock samples from the National Geochemical Database: U.S. Geological Survey, Reston, VA.	U.S. Geological Survey	USGS		45.05	-113.844	0.01	72	72	72	ES	SEDIMENTARY	UNKNOWN	UNKNOWN	BRECCIA																						7	500	15		70
D334700		USGS		Geochemistry of rock samples from the National Geochemical Database: U.S. Geological Survey, Reston, VA.	U.S. Geological Survey	USGS		45.05	-113.844	0.01	72	72	72	ICPAES	SEDIMENTARY	UNKNOWN	UNKNOWN	BRECCIA																										35		13
D334704		USGS		Geochemistry of rock samples from the National Geochemical Database: U.S. Geological Survey, Reston, VA.	U.S. Geological Survey	USGS		45.0181	-113.821	0.01	72	72	72	ES	SEDIMENTARY	UNKNOWN	UNKNOWN	BRECCIA																						20	200	50	15	150		200
D334704		USGS		Geochemistry of rock samples from the National Geochemical Database: U.S. Geological Survey, Reston, VA.	U.S. Geological Survey	USGS		45.0181	-113.821	0.01	72	72	72	ICPAES	SEDIMENTARY	UNKNOWN	UNKNOWN	BRECCIA																										92	0.03	87	19
D334717		USGS		Geochemistry of rock samples from the National Geochemical Database: U.S. Geological Survey, Reston, VA.	U.S. Geological Survey	USGS		44.9292	-113.692	0.01	72	72	72	ES	SEDIMENTARY	UNKNOWN	UNKNOWN	BRECCIA																						2	100	7		20
D334717		USGS		Geochemistry of rock samples from the National Geochemical Database: U.S. Geological Survey, Reston, VA.	U.S. Geological Survey	USGS		44.9292	-113.692	0.01	72	72	72	ICPAES	SEDIMENTARY	UNKNOWN	UNKNOWN	BRECCIA																										4.8		3.5	7.2
D334721		USGS		Geochemistry of rock samples from the National Geochemical Database: U.S. Geological Survey, Reston, VA.	U.S. Geological Survey	USGS		44.9292	-113.7	0.01	72	72	72	ES	SEDIMENTARY	UNKNOWN	UNKNOWN	BRECCIA																						5	150	50	10	7
D334721		USGS		Geochemistry of rock samples from the National Geochemical Database: U.S. Geological Survey, Reston, VA.	U.S. Geological Survey	USGS		44.9292	-113.7	0.01	72	72	72	ICPAES	SEDIMENTARY	UNKNOWN	UNKNOWN	BRECCIA																										0.68		13
D334722		USGS		Geochemistry of rock samples from the National Geochemical Database: U.S. Geological Survey, Reston, VA.	U.S. Geological Survey	USGS		44.9778	-113.733	0.01	72	72	72	ES	SEDIMENTARY	UNKNOWN	UNKNOWN	BRECCIA																						1.5	50
D334722		USGS		Geochemistry of rock samples from the National Geochemical Database: U.S. Geological Survey, Reston, VA.	U.S. Geological Survey	USGS		44.9778	-113.733	0.01	72	72	72	ICPAES	SEDIMENTARY	UNKNOWN	UNKNOWN	BRECCIA																										0.91		2	1.7
D334723		USGS		Geochemistry of rock samples from the National Geochemical Database: U.S. Geological Survey, Reston, VA.	U.S. Geological Survey	USGS		44.9778	-113.733	0.01	72	72	72	ES	SEDIMENTARY	UNKNOWN	UNKNOWN	BRECCIA																						5	150	5	10	30
D334723		USGS		Geochemistry of rock samples from the National Geochemical Database: U.S. Geological Survey, Reston, VA.	U.S. Geological Survey	USGS		44.9778	-113.733	0.01	72	72	72	ICPAES	SEDIMENTARY	UNKNOWN	UNKNOWN	BRECCIA																										5.9		6.7	22
D334727		USGS		Geochemistry of rock samples from the National Geochemical Database: U.S. Geological Survey, Reston, VA.	U.S. Geological Survey	USGS		44.9125	-113.768	0.01	72	72	72	ES	SEDIMENTARY	UNKNOWN	UNKNOWN	BRECCIA																						10	300	10	15	100
D334727		USGS		Geochemistry of rock samples from the National Geochemical Database: U.S. Geological Survey, Reston, VA.	U.S. Geological Survey	USGS		44.9125	-113.768	0.01	72	72	72	ICPAES	SEDIMENTARY	UNKNOWN	UNKNOWN	BRECCIA																										66		22
D334730		USGS		Geochemistry of rock samples from the National Geochemical Database: U.S. Geological Survey, Reston, VA.	U.S. Geological Survey	USGS		45.075	-113.854	0.01	72	72	72	ES	SEDIMENTARY	UNKNOWN	UNKNOWN	BRECCIA																						2	150			300				0.7
D334730		USGS		Geochemistry of rock samples from the National Geochemical Database: U.S. Geological Survey, Reston, VA.	U.S. Geological Survey	USGS		45.075	-113.854	0.01	72	72	72	ICPAES	SEDIMENTARY	UNKNOWN	UNKNOWN	BRECCIA																										110		15	2.3	0.08
D334732		USGS		Geochemistry of rock samples from the National Geochemical Database: U.S. Geological Survey, Reston, VA.	U.S. Geological Survey	USGS		45.075	-113.854	0.01	72	72	72	ES	SEDIMENTARY	UNKNOWN	UNKNOWN	BRECCIA																						7	200	15	30	150
D334732		USGS		Geochemistry of rock samples from the National Geochemical Database: U.S. Geological Survey, Reston, VA.	U.S. Geological Survey	USGS		45.075	-113.854	0.01	72	72	72	ICPAES	SEDIMENTARY	UNKNOWN	UNKNOWN	BRECCIA																										97		38	0.93
D334750		USGS		Geochemistry of rock samples from the National Geochemical Database: U.S. Geological Survey, Reston, VA.	U.S. Geological Survey	USGS		45.0097	-113.825	0.01	72	72	72	ES	SEDIMENTARY	UNKNOWN	UNKNOWN	BRECCIA																						7	100	100	2000	1500				1.5
D334750		USGS		Geochemistry of rock samples from the National Geochemical Database: U.S. Geological Survey, Reston, VA.	U.S. Geological Survey	USGS		45.0097	-113.825	0.01	72	72	72	ICPAES	SEDIMENTARY	UNKNOWN	UNKNOWN	BRECCIA																										970		4.7	29	0.35
D335590		USGS		Geochemistry of rock samples from the National Geochemical Database: U.S. Geological Survey, Reston, VA.	U.S. Geological Survey	USGS		60.4214	-159.135	0.01	65	65	65	AAS	SEDIMENTARY	UNKNOWN	UNKNOWN	BRECCIA
D335590		USGS		Geochemistry of rock samples from the National Geochemical Database: U.S. Geological Survey, Reston, VA.	U.S. Geological Survey	USGS		60.4214	-159.135	0.01	65	65	65	ES	SEDIMENTARY	UNKNOWN	UNKNOWN	BRECCIA																						3	1000	10	10	10
D335590		USGS		Geochemistry of rock samples from the National Geochemical Database: U.S. Geological Survey, Reston, VA.	U.S. Geological Survey	USGS		60.4214	-159.135	0.01	65	65	65	ICPAES	SEDIMENTARY	UNKNOWN	UNKNOWN	BRECCIA																										18	0.063	64	19	0.054
D335617		USGS		Geochemistry of rock samples from the National Geochemical Database: U.S. Geological Survey, Reston, VA.	U.S. Geological Survey	USGS		60.2933	-159.022	0.01	65	65	65	AAS	SEDIMENTARY	UNKNOWN	UNKNOWN	BRECCIA
D335617		USGS		Geochemistry of rock samples from the National Geochemical Database: U.S. Geological Survey, Reston, VA.	U.S. Geological Survey	USGS		60.2933	-159.022	0.01	65	65	65	ES	SEDIMENTARY	UNKNOWN	UNKNOWN	BRECCIA																						7	2000	30	30	70
D335617		USGS		Geochemistry of rock samples from the National Geochemical Database: U.S. Geological Survey, Reston, VA.	U.S. Geological Survey	USGS		60.2933	-159.022	0.01	65	65	65	ICPAES	SEDIMENTARY	UNKNOWN	UNKNOWN	BRECCIA																										1.5	0.45	1	34	0.45
D335618		USGS		Geochemistry of rock samples from the National Geochemical Database: U.S. Geological Survey, Reston, VA.	U.S. Geological Survey	USGS		60.2933	-159.022	0.01	65	65	65	AAS	SEDIMENTARY	UNKNOWN	UNKNOWN	BRECCIA
D335618		USGS		Geochemistry of rock samples from the National Geochemical Database: U.S. Geological Survey, Reston, VA.	U.S. Geological Survey	USGS		60.2933	-159.022	0.01	65	65	65	ES	SEDIMENTARY	UNKNOWN	UNKNOWN	BRECCIA																						7	1500	20	15	30
D335618		USGS		Geochemistry of rock samples from the National Geochemical Database: U.S. Geological Survey, Reston, VA.	U.S. Geological Survey	USGS		60.2933	-159.022	0.01	65	65	65	ICPAES	SEDIMENTARY	UNKNOWN	UNKNOWN	BRECCIA																												0.19	53	0.25
D335619		USGS		Geochemistry of rock samples from the National Geochemical Database: U.S. Geological Survey, Reston, VA.	U.S. Geological Survey	USGS		60.2933	-159.005	0.01	65	65	65	AAS	SEDIMENTARY	UNKNOWN	UNKNOWN	BRECCIA
D335619		USGS		Geochemistry of rock samples from the National Geochemical Database: U.S. Geological Survey, Reston, VA.	U.S. Geological Survey	USGS		60.2933	-159.005	0.01	65	65	65	ES	SEDIMENTARY	UNKNOWN	UNKNOWN	BRECCIA																						3	1500	7	15	20				0.7
D335619		USGS		Geochemistry of rock samples from the National Geochemical Database: U.S. Geological Survey, Reston, VA.	U.S. Geological Survey	USGS		60.2933	-159.005	0.01	65	65	65	ICPAES	SEDIMENTARY	UNKNOWN	UNKNOWN	BRECCIA																												1.4	4.7	0.11
D335621		USGS		Geochemistry of rock samples from the National Geochemical Database: U.S. Geological Survey, Reston, VA.	U.S. Geological Survey	USGS		60.2933	-159.005	0.01	65	65	65	AAS	SEDIMENTARY	UNKNOWN	UNKNOWN	BRECCIA
D335621		USGS		Geochemistry of rock samples from the National Geochemical Database: U.S. Geological Survey, Reston, VA.	U.S. Geological Survey	USGS		60.2933	-159.005	0.01	65	65	65	ES	SEDIMENTARY	UNKNOWN	UNKNOWN	BRECCIA																						7	1500	70	30	50
D335621		USGS		Geochemistry of rock samples from the National Geochemical Database: U.S. Geological Survey, Reston, VA.	U.S. Geological Survey	USGS		60.2933	-159.005	0.01	65	65	65	ICPAES	SEDIMENTARY	UNKNOWN	UNKNOWN	BRECCIA																												3.7	6
D336184		USGS		Geochemistry of rock samples from the National Geochemical Database: U.S. Geological Survey, Reston, VA.	U.S. Geological Survey	USGS		60.2861	-159.024	0.01	65	65	65	ES	SEDIMENTARY	UNKNOWN	UNKNOWN	BRECCIA																						1.5	700	5						0.5
D336184		USGS		Geochemistry of rock samples from the National Geochemical Database: U.S. Geological Survey, Reston, VA.	U.S. Geological Survey	USGS		60.2861	-159.024	0.01	65	65	65	ICPAES	SEDIMENTARY	UNKNOWN	UNKNOWN	BRECCIA																										0.65		16
D336229		USGS		Geochemistry of rock samples from the National Geochemical Database: U.S. Geological Survey, Reston, VA.	U.S. Geological Survey	USGS		60.1189	-159.964	0.01	65	65	65	AAS	SEDIMENTARY	UNKNOWN	UNKNOWN	BRECCIA
D336229		USGS		Geochemistry of rock samples from the National Geochemical Database: U.S. Geological Survey, Reston, VA.	U.S. Geological Survey	USGS		60.1189	-159.964	0.01	65	65	65	ES	SEDIMENTARY	UNKNOWN	UNKNOWN	BRECCIA																						1.5	100
D336229		USGS		Geochemistry of rock samples from the National Geochemical Database: U.S. Geological Survey, Reston, VA.	U.S. Geological Survey	USGS		60.1189	-159.964	0.01	65	65	65	ICPAES	SEDIMENTARY	UNKNOWN	UNKNOWN	BRECCIA																										1.8		1	8.4	0.051
D336603		USGS		Geochemistry of rock samples from the National Geochemical Database: U.S. Geological Survey, Reston, VA.	U.S. Geological Survey	USGS		41.2067	-114.916	0.01	55	55	55	AAS	SEDIMENTARY	UNKNOWN	UNKNOWN	BRECCIA
D336601		USGS		Geochemistry of rock samples from the National Geochemical Database: U.S. Geological Survey, Reston, VA.	U.S. Geological Survey	USGS		41.2067	-114.916	0.01	55	55	55	AAS	SEDIMENTARY	UNKNOWN	UNKNOWN	BRECCIA
D336601		USGS		Geochemistry of rock samples from the National Geochemical Database: U.S. Geological Survey, Reston, VA.	U.S. Geological Survey	USGS		41.2067	-114.916	0.01	55	55	55	ES	SEDIMENTARY	UNKNOWN	UNKNOWN	BRECCIA																							150
D336601		USGS		Geochemistry of rock samples from the National Geochemical Database: U.S. Geological Survey, Reston, VA.	U.S. Geological Survey	USGS		41.2067	-114.916	0.01	55	55	55	ICPAES	SEDIMENTARY	UNKNOWN	UNKNOWN	BRECCIA																										0.87	0.033	2.4	1.1
D336603		USGS		Geochemistry of rock samples from the National Geochemical Database: U.S. Geological Survey, Reston, VA.	U.S. Geological Survey	USGS		41.2067	-114.916	0.01	55	55	55	ES	SEDIMENTARY	UNKNOWN	UNKNOWN	BRECCIA																						0.1	200
D336603		USGS		Geochemistry of rock samples from the National Geochemical Database: U.S. Geological Survey, Reston, VA.	U.S. Geological Survey	USGS		41.2067	-114.916	0.01	55	55	55	ICPAES	SEDIMENTARY	UNKNOWN	UNKNOWN	BRECCIA																										1.9	0.068	17	12
D359528		USGS		Geochemistry of rock samples from the National Geochemical Database: U.S. Geological Survey, Reston, VA.	U.S. Geological Survey	USGS		43.4342	-113.62	0.01				AAS	SEDIMENTARY	UNKNOWN	UNKNOWN	BRECCIA
D359528		USGS		Geochemistry of rock samples from the National Geochemical Database: U.S. Geological Survey, Reston, VA.	U.S. Geological Survey	USGS		43.4342	-113.62	0.01				ES	SEDIMENTARY	UNKNOWN	UNKNOWN	BRECCIA																						0.7	10			7				2
D359528		USGS		Geochemistry of rock samples from the National Geochemical Database: U.S. Geological Survey, Reston, VA.	U.S. Geological Survey	USGS		43.4342	-113.62	0.01				ICPAES	SEDIMENTARY	UNKNOWN	UNKNOWN	BRECCIA																										3.8		1.2	15	0.41
D359529		USGS		Geochemistry of rock samples from the National Geochemical Database: U.S. Geological Survey, Reston, VA.	U.S. Geological Survey	USGS		43.4242	-113.621	0.01				AAS	SEDIMENTARY	UNKNOWN	UNKNOWN	BRECCIA
D359529		USGS		Geochemistry of rock samples from the National Geochemical Database: U.S. Geological Survey, Reston, VA.	U.S. Geological Survey	USGS		43.4242	-113.621	0.01				ES	SEDIMENTARY	UNKNOWN	UNKNOWN	BRECCIA																						0.7	10			10
D359529		USGS		Geochemistry of rock samples from the National Geochemical Database: U.S. Geological Survey, Reston, VA.	U.S. Geological Survey	USGS		43.4242	-113.621	0.01				ICPAES	SEDIMENTARY	UNKNOWN	UNKNOWN	BRECCIA																										6		2.4	46
D378588		USGS		Geochemistry of rock samples from the National Geochemical Database: U.S. Geological Survey, Reston, VA.	U.S. Geological Survey	USGS		7.78611	-62.3869	0.01	72	72	72	AAS	SEDIMENTARY	UNKNOWN	UNKNOWN	BRECCIA														0.454
D378588		USGS		Geochemistry of rock samples from the National Geochemical Database: U.S. Geological Survey, Reston, VA.	U.S. Geological Survey	USGS		7.78611	-62.3869	0.01	72	72	72	ES	SEDIMENTARY	UNKNOWN	UNKNOWN	BRECCIA																						7	1000	50	50	100
D378588		USGS		Geochemistry of rock samples from the National Geochemical Database: U.S. Geological Survey, Reston, VA.	U.S. Geological Survey	USGS		7.78611	-62.3869	0.01	72	72	72	ICPAES	SEDIMENTARY	UNKNOWN	UNKNOWN	BRECCIA																										86	0.16	78		0.073
D384670		USGS		Geochemistry of rock samples from the National Geochemical Database: U.S. Geological Survey, Reston, VA.	U.S. Geological Survey	USGS		68.3589	-157.299	0.01				ES	SEDIMENTARY	UNKNOWN	UNKNOWN	BRECCIA																						0.7	200	10	10	7
D384670		USGS		Geochemistry of rock samples from the National Geochemical Database: U.S. Geological Survey, Reston, VA.	U.S. Geological Survey	USGS		68.3589	-157.299	0.01				ICPAES	SEDIMENTARY	UNKNOWN	UNKNOWN	BRECCIA																						0.86	120	16	7	5.6	0.066	26
D385617		USGS		Geochemistry of rock samples from the National Geochemical Database: U.S. Geological Survey, Reston, VA.	U.S. Geological Survey	USGS		32.6011	-110.345	0.01	15	15	15	ICPAES	SEDIMENTARY	UNKNOWN	UNKNOWN	BRECCIA																										3.4	0.073	14	1.4
D388369		USGS		Geochemistry of rock samples from the National Geochemical Database: U.S. Geological Survey, Reston, VA.	U.S. Geological Survey	USGS		54.7133	-163.097	0.01				AAS	SEDIMENTARY	UNKNOWN	UNKNOWN	BRECCIA																										70		75
D388369		USGS		Geochemistry of rock samples from the National Geochemical Database: U.S. Geological Survey, Reston, VA.	U.S. Geological Survey	USGS		54.7133	-163.097	0.01				ES	SEDIMENTARY	UNKNOWN	UNKNOWN	BRECCIA																						5	1500		30	100
D388378		USGS		Geochemistry of rock samples from the National Geochemical Database: U.S. Geological Survey, Reston, VA.	U.S. Geological Survey	USGS		54.6686	-163.05	0.01				AAS	SEDIMENTARY	UNKNOWN	UNKNOWN	BRECCIA																										5	0.1	60
D388378		USGS		Geochemistry of rock samples from the National Geochemical Database: U.S. Geological Survey, Reston, VA.	U.S. Geological Survey	USGS		54.6686	-163.05	0.01				ES	SEDIMENTARY	UNKNOWN	UNKNOWN	BRECCIA																						1.5	700
D388383		USGS		Geochemistry of rock samples from the National Geochemical Database: U.S. Geological Survey, Reston, VA.	U.S. Geological Survey	USGS		54.6989	-163.197	0.01				AAS	SEDIMENTARY	UNKNOWN	UNKNOWN	BRECCIA																												15
D388383		USGS		Geochemistry of rock samples from the National Geochemical Database: U.S. Geological Survey, Reston, VA.	U.S. Geological Survey	USGS		54.6989	-163.197	0.01				ES	SEDIMENTARY	UNKNOWN	UNKNOWN	BRECCIA																						1.5	300			5
D388390		USGS		Geochemistry of rock samples from the National Geochemical Database: U.S. Geological Survey, Reston, VA.	U.S. Geological Survey	USGS		54.8483	-163.378	0.01				AAS	SEDIMENTARY	UNKNOWN	UNKNOWN	BRECCIA																										40		55	260	0.6
D388390		USGS		Geochemistry of rock samples from the National Geochemical Database: U.S. Geological Survey, Reston, VA.	U.S. Geological Survey	USGS		54.8483	-163.378	0.01				ES	SEDIMENTARY	UNKNOWN	UNKNOWN	BRECCIA																						5	500		15	30				0.5
D388392		USGS		Geochemistry of rock samples from the National Geochemical Database: U.S. Geological Survey, Reston, VA.	U.S. Geological Survey	USGS		54.8483	-163.378	0.01				AAS	SEDIMENTARY	UNKNOWN	UNKNOWN	BRECCIA																										40		60	160	0.45
D388392		USGS		Geochemistry of rock samples from the National Geochemical Database: U.S. Geological Survey, Reston, VA.	U.S. Geological Survey	USGS		54.8483	-163.378	0.01				ES	SEDIMENTARY	UNKNOWN	UNKNOWN	BRECCIA																						5	700		20	30
D388393		USGS		Geochemistry of rock samples from the National Geochemical Database: U.S. Geological Survey, Reston, VA.	U.S. Geological Survey	USGS		54.8483	-163.378	0.01				AAS	SEDIMENTARY	UNKNOWN	UNKNOWN	BRECCIA																										30		70	210	0.3
D388393		USGS		Geochemistry of rock samples from the National Geochemical Database: U.S. Geological Survey, Reston, VA.	U.S. Geological Survey	USGS		54.8483	-163.378	0.01				ES	SEDIMENTARY	UNKNOWN	UNKNOWN	BRECCIA																						5	1000	10	20	20
D388394		USGS		Geochemistry of rock samples from the National Geochemical Database: U.S. Geological Survey, Reston, VA.	U.S. Geological Survey	USGS		54.8483	-163.378	0.01				AAS	SEDIMENTARY	UNKNOWN	UNKNOWN	BRECCIA																										25	0.1	60	370	0.7
D388394		USGS		Geochemistry of rock samples from the National Geochemical Database: U.S. Geological Survey, Reston, VA.	U.S. Geological Survey	USGS		54.8483	-163.378	0.01				ES	SEDIMENTARY	UNKNOWN	UNKNOWN	BRECCIA																						5	1000	10	30	30				0.7
D388396		USGS		Geochemistry of rock samples from the National Geochemical Database: U.S. Geological Survey, Reston, VA.	U.S. Geological Survey	USGS		54.8483	-163.378	0.01				AAS	SEDIMENTARY	UNKNOWN	UNKNOWN	BRECCIA																										30		65	120	0.55
D388396		USGS		Geochemistry of rock samples from the National Geochemical Database: U.S. Geological Survey, Reston, VA.	U.S. Geological Survey	USGS		54.8483	-163.378	0.01				ES	SEDIMENTARY	UNKNOWN	UNKNOWN	BRECCIA																						5	1000		20	30				0.5
D388398		USGS		Geochemistry of rock samples from the National Geochemical Database: U.S. Geological Survey, Reston, VA.	U.S. Geological Survey	USGS		54.8483	-163.378	0.01				AAS	SEDIMENTARY	UNKNOWN	UNKNOWN	BRECCIA																										70		55	70	0.4
D388398		USGS		Geochemistry of rock samples from the National Geochemical Database: U.S. Geological Survey, Reston, VA.	U.S. Geological Survey	USGS		54.8483	-163.378	0.01				ES	SEDIMENTARY	UNKNOWN	UNKNOWN	BRECCIA																						5	1000		30	50
D388399		USGS		Geochemistry of rock samples from the National Geochemical Database: U.S. Geological Survey, Reston, VA.	U.S. Geological Survey	USGS		54.8483	-163.378	0.01				AAS	SEDIMENTARY	UNKNOWN	UNKNOWN	BRECCIA																										45		60	40	0.45
D388399		USGS		Geochemistry of rock samples from the National Geochemical Database: U.S. Geological Survey, Reston, VA.	U.S. Geological Survey	USGS		54.8483	-163.378	0.01				ES	SEDIMENTARY	UNKNOWN	UNKNOWN	BRECCIA																						5	700		20	30				0.5
D388401		USGS		Geochemistry of rock samples from the National Geochemical Database: U.S. Geological Survey, Reston, VA.	U.S. Geological Survey	USGS		54.8483	-163.378	0.01				AAS	SEDIMENTARY	UNKNOWN	UNKNOWN	BRECCIA																										20		55	70	0.65
D388401		USGS		Geochemistry of rock samples from the National Geochemical Database: U.S. Geological Survey, Reston, VA.	U.S. Geological Survey	USGS		54.8483	-163.378	0.01				ES	SEDIMENTARY	UNKNOWN	UNKNOWN	BRECCIA																						5	700		15	15				0.5
D388403		USGS		Geochemistry of rock samples from the National Geochemical Database: U.S. Geological Survey, Reston, VA.	U.S. Geological Survey	USGS		54.8483	-163.378	0.01				AAS	SEDIMENTARY	UNKNOWN	UNKNOWN	BRECCIA																										30		55	210	0.85
D388403		USGS		Geochemistry of rock samples from the National Geochemical Database: U.S. Geological Survey, Reston, VA.	U.S. Geological Survey	USGS		54.8483	-163.378	0.01				ES	SEDIMENTARY	UNKNOWN	UNKNOWN	BRECCIA																						5	700		15	30				1
D388405		USGS		Geochemistry of rock samples from the National Geochemical Database: U.S. Geological Survey, Reston, VA.	U.S. Geological Survey	USGS		54.8483	-163.378	0.01				AAS	SEDIMENTARY	UNKNOWN	UNKNOWN	BRECCIA																										25		50	120	0.5
D388405		USGS		Geochemistry of rock samples from the National Geochemical Database: U.S. Geological Survey, Reston, VA.	U.S. Geological Survey	USGS		54.8483	-163.378	0.01				ES	SEDIMENTARY	UNKNOWN	UNKNOWN	BRECCIA																						5	700		20	20				0.5
D388406		USGS		Geochemistry of rock samples from the National Geochemical Database: U.S. Geological Survey, Reston, VA.	U.S. Geological Survey	USGS		54.8483	-163.378	0.01				AAS	SEDIMENTARY	UNKNOWN	UNKNOWN	BRECCIA																										45		55	160	0.95
D388406		USGS		Geochemistry of rock samples from the National Geochemical Database: U.S. Geological Survey, Reston, VA.	U.S. Geological Survey	USGS		54.8483	-163.378	0.01				ES	SEDIMENTARY	UNKNOWN	UNKNOWN	BRECCIA																						3	700		30	30				1
D388407		USGS		Geochemistry of rock samples from the National Geochemical Database: U.S. Geological Survey, Reston, VA.	U.S. Geological Survey	USGS		54.8483	-163.378	0.01				AAS	SEDIMENTARY	UNKNOWN	UNKNOWN	BRECCIA																										35		50	40	0.35
D388407		USGS		Geochemistry of rock samples from the National Geochemical Database: U.S. Geological Survey, Reston, VA.	U.S. Geological Survey	USGS		54.8483	-163.378	0.01				ES	SEDIMENTARY	UNKNOWN	UNKNOWN	BRECCIA																						5	700		30	30				0.5
D388408		USGS		Geochemistry of rock samples from the National Geochemical Database: U.S. Geological Survey, Reston, VA.	U.S. Geological Survey	USGS		54.8483	-163.378	0.01				AAS	SEDIMENTARY	UNKNOWN	UNKNOWN	BRECCIA																										40		55	130	0.4
D388408		USGS		Geochemistry of rock samples from the National Geochemical Database: U.S. Geological Survey, Reston, VA.	U.S. Geological Survey	USGS		54.8483	-163.378	0.01				ES	SEDIMENTARY	UNKNOWN	UNKNOWN	BRECCIA																						5	700		30	30				0.5
D388409		USGS		Geochemistry of rock samples from the National Geochemical Database: U.S. Geological Survey, Reston, VA.	U.S. Geological Survey	USGS		54.8483	-163.378	0.01				AAS	SEDIMENTARY	UNKNOWN	UNKNOWN	BRECCIA																										30		55	70	0.35
D388409		USGS		Geochemistry of rock samples from the National Geochemical Database: U.S. Geological Survey, Reston, VA.	U.S. Geological Survey	USGS		54.8483	-163.378	0.01				ES	SEDIMENTARY	UNKNOWN	UNKNOWN	BRECCIA																						5	1000	10	20	20
D388410		USGS		Geochemistry of rock samples from the National Geochemical Database: U.S. Geological Survey, Reston, VA.	U.S. Geological Survey	USGS		54.8483	-163.378	0.01				AAS	SEDIMENTARY	UNKNOWN	UNKNOWN	BRECCIA																										55		55	50	0.65
D388410		USGS		Geochemistry of rock samples from the National Geochemical Database: U.S. Geological Survey, Reston, VA.	U.S. Geological Survey	USGS		54.8483	-163.378	0.01				ES	SEDIMENTARY	UNKNOWN	UNKNOWN	BRECCIA																						5	700		20	50				0.5
D388411		USGS		Geochemistry of rock samples from the National Geochemical Database: U.S. Geological Survey, Reston, VA.	U.S. Geological Survey	USGS		54.8483	-163.378	0.01				AAS	SEDIMENTARY	UNKNOWN	UNKNOWN	BRECCIA																										40		60	60	0.35
D388411		USGS		Geochemistry of rock samples from the National Geochemical Database: U.S. Geological Survey, Reston, VA.	U.S. Geological Survey	USGS		54.8483	-163.378	0.01				ES	SEDIMENTARY	UNKNOWN	UNKNOWN	BRECCIA																						5	1000		30	30
D388412		USGS		Geochemistry of rock samples from the National Geochemical Database: U.S. Geological Survey, Reston, VA.	U.S. Geological Survey	USGS		54.8483	-163.378	0.01				AAS	SEDIMENTARY	UNKNOWN	UNKNOWN	BRECCIA																										25		60	240	0.35
D388412		USGS		Geochemistry of rock samples from the National Geochemical Database: U.S. Geological Survey, Reston, VA.	U.S. Geological Survey	USGS		54.8483	-163.378	0.01				ES	SEDIMENTARY	UNKNOWN	UNKNOWN	BRECCIA																						5	1000		20	20
D388413		USGS		Geochemistry of rock samples from the National Geochemical Database: U.S. Geological Survey, Reston, VA.	U.S. Geological Survey	USGS		54.8483	-163.378	0.01				AAS	SEDIMENTARY	UNKNOWN	UNKNOWN	BRECCIA																										30	0.2	55	280	1.9
D388413		USGS		Geochemistry of rock samples from the National Geochemical Database: U.S. Geological Survey, Reston, VA.	U.S. Geological Survey	USGS		54.8483	-163.378	0.01				ES	SEDIMENTARY	UNKNOWN	UNKNOWN	BRECCIA																						5	700		30	30				1.5
D388414		USGS		Geochemistry of rock samples from the National Geochemical Database: U.S. Geological Survey, Reston, VA.	U.S. Geological Survey	USGS		54.8483	-163.378	0.01				AAS	SEDIMENTARY	UNKNOWN	UNKNOWN	BRECCIA																										40	0.1	60	100	0.4
D388414		USGS		Geochemistry of rock samples from the National Geochemical Database: U.S. Geological Survey, Reston, VA.	U.S. Geological Survey	USGS		54.8483	-163.378	0.01				ES	SEDIMENTARY	UNKNOWN	UNKNOWN	BRECCIA																						3	1000	10	20	30				0.5
D388432		USGS		Geochemistry of rock samples from the National Geochemical Database: U.S. Geological Survey, Reston, VA.	U.S. Geological Survey	USGS		54.6972	-163.283	0.01				AAS	SEDIMENTARY	UNKNOWN	UNKNOWN	BRECCIA																										20	0.3	100	90	0.2
D388432		USGS		Geochemistry of rock samples from the National Geochemical Database: U.S. Geological Survey, Reston, VA.	U.S. Geological Survey	USGS		54.6972	-163.283	0.01				ES	SEDIMENTARY	UNKNOWN	UNKNOWN	BRECCIA																						5	500	10	15	10
D388435		USGS		Geochemistry of rock samples from the National Geochemical Database: U.S. Geological Survey, Reston, VA.	U.S. Geological Survey	USGS		54.6672	-163.414	0.01				AAS	SEDIMENTARY	UNKNOWN	UNKNOWN	BRECCIA																										40	0.1	80
D388435		USGS		Geochemistry of rock samples from the National Geochemical Database: U.S. Geological Survey, Reston, VA.	U.S. Geological Survey	USGS		54.6672	-163.414	0.01				ES	SEDIMENTARY	UNKNOWN	UNKNOWN	BRECCIA																						5	700	7	20	30
D388441		USGS		Geochemistry of rock samples from the National Geochemical Database: U.S. Geological Survey, Reston, VA.	U.S. Geological Survey	USGS		54.6778	-163.411	0.01				AAS	SEDIMENTARY	UNKNOWN	UNKNOWN	BRECCIA																										5
D388441		USGS		Geochemistry of rock samples from the National Geochemical Database: U.S. Geological Survey, Reston, VA.	U.S. Geological Survey	USGS		54.6778	-163.411	0.01				ES	SEDIMENTARY	UNKNOWN	UNKNOWN	BRECCIA																						3	70			5
D388442		USGS		Geochemistry of rock samples from the National Geochemical Database: U.S. Geological Survey, Reston, VA.	U.S. Geological Survey	USGS		54.6783	-163.411	0.01				AAS	SEDIMENTARY	UNKNOWN	UNKNOWN	BRECCIA																										30		25
D388442		USGS		Geochemistry of rock samples from the National Geochemical Database: U.S. Geological Survey, Reston, VA.	U.S. Geological Survey	USGS		54.6783	-163.411	0.01				ES	SEDIMENTARY	UNKNOWN	UNKNOWN	BRECCIA																						5	700		15	10
D388444		USGS		Geochemistry of rock samples from the National Geochemical Database: U.S. Geological Survey, Reston, VA.	U.S. Geological Survey	USGS		54.6433	-163.508	0.01				AAS	SEDIMENTARY	UNKNOWN	UNKNOWN	BRECCIA																										10	0.2	45	40	0.05
D388444		USGS		Geochemistry of rock samples from the National Geochemical Database: U.S. Geological Survey, Reston, VA.	U.S. Geological Survey	USGS		54.6433	-163.508	0.01				ES	SEDIMENTARY	UNKNOWN	UNKNOWN	BRECCIA																						5	500		15	30
D388446		USGS		Geochemistry of rock samples from the National Geochemical Database: U.S. Geological Survey, Reston, VA.	U.S. Geological Survey	USGS		54.8742	-163.326	0.01				AAS	SEDIMENTARY	UNKNOWN	UNKNOWN	BRECCIA																										20	0.1	55
D388446		USGS		Geochemistry of rock samples from the National Geochemical Database: U.S. Geological Survey, Reston, VA.	U.S. Geological Survey	USGS		54.8742	-163.326	0.01				ES	SEDIMENTARY	UNKNOWN	UNKNOWN	BRECCIA																						2	500	7	15	15
D388447		USGS		Geochemistry of rock samples from the National Geochemical Database: U.S. Geological Survey, Reston, VA.	U.S. Geological Survey	USGS		54.8806	-163.317	0.01				AAS	SEDIMENTARY	UNKNOWN	UNKNOWN	BRECCIA																										15		50
D388447		USGS		Geochemistry of rock samples from the National Geochemical Database: U.S. Geological Survey, Reston, VA.	U.S. Geological Survey	USGS		54.8806	-163.317	0.01				ES	SEDIMENTARY	UNKNOWN	UNKNOWN	BRECCIA																						5	500		20	10
D388449		USGS		Geochemistry of rock samples from the National Geochemical Database: U.S. Geological Survey, Reston, VA.	U.S. Geological Survey	USGS		54.8906	-163.398	0.01				AAS	SEDIMENTARY	UNKNOWN	UNKNOWN	BRECCIA																										45		60
D388449		USGS		Geochemistry of rock samples from the National Geochemical Database: U.S. Geological Survey, Reston, VA.	U.S. Geological Survey	USGS		54.8906	-163.398	0.01				ES	SEDIMENTARY	UNKNOWN	UNKNOWN	BRECCIA																						3	700		20	30
D388450		USGS		Geochemistry of rock samples from the National Geochemical Database: U.S. Geological Survey, Reston, VA.	U.S. Geological Survey	USGS		54.8889	-163.401	0.01				AAS	SEDIMENTARY	UNKNOWN	UNKNOWN	BRECCIA																										25		50
D388450		USGS		Geochemistry of rock samples from the National Geochemical Database: U.S. Geological Survey, Reston, VA.	U.S. Geological Survey	USGS		54.8889	-163.401	0.01				ES	SEDIMENTARY	UNKNOWN	UNKNOWN	BRECCIA																						5	700	5	20	15
D388454		USGS		Geochemistry of rock samples from the National Geochemical Database: U.S. Geological Survey, Reston, VA.	U.S. Geological Survey	USGS		54.8711	-163.177	0.01				AAS	SEDIMENTARY	UNKNOWN	UNKNOWN	BRECCIA																										10		5
D388454		USGS		Geochemistry of rock samples from the National Geochemical Database: U.S. Geological Survey, Reston, VA.	U.S. Geological Survey	USGS		54.8711	-163.177	0.01				ES	SEDIMENTARY	UNKNOWN	UNKNOWN	BRECCIA																						2	50			10
D388456		USGS		Geochemistry of rock samples from the National Geochemical Database: U.S. Geological Survey, Reston, VA.	U.S. Geological Survey	USGS		54.6881	-163.047	0.01				AAS	SEDIMENTARY	UNKNOWN	UNKNOWN	BRECCIA																										10	0.1	50	100	0.55
D388456		USGS		Geochemistry of rock samples from the National Geochemical Database: U.S. Geological Survey, Reston, VA.	U.S. Geological Survey	USGS		54.6881	-163.047	0.01				ES	SEDIMENTARY	UNKNOWN	UNKNOWN	BRECCIA																						3	1000	15	20	10				0.5
D388460		USGS		Geochemistry of rock samples from the National Geochemical Database: U.S. Geological Survey, Reston, VA.	U.S. Geological Survey	USGS		54.6761	-163.052	0.01				AAS	SEDIMENTARY	UNKNOWN	UNKNOWN	BRECCIA																										10		30	30	1.4
D388460		USGS		Geochemistry of rock samples from the National Geochemical Database: U.S. Geological Survey, Reston, VA.	U.S. Geological Survey	USGS		54.6761	-163.052	0.01				ES	SEDIMENTARY	UNKNOWN	UNKNOWN	BRECCIA																						5	500	7		7				1
D388462		USGS		Geochemistry of rock samples from the National Geochemical Database: U.S. Geological Survey, Reston, VA.	U.S. Geological Survey	USGS		54.7003	-163.188	0.01				AAS	SEDIMENTARY	UNKNOWN	UNKNOWN	BRECCIA																										30		75	10	0.05
D388462		USGS		Geochemistry of rock samples from the National Geochemical Database: U.S. Geological Survey, Reston, VA.	U.S. Geological Survey	USGS		54.7003	-163.188	0.01				ES	SEDIMENTARY	UNKNOWN	UNKNOWN	BRECCIA																						5	700	10	15	30
D388465		USGS		Geochemistry of rock samples from the National Geochemical Database: U.S. Geological Survey, Reston, VA.	U.S. Geological Survey	USGS		54.7092	-163.302	0.01				AAS	SEDIMENTARY	UNKNOWN	UNKNOWN	BRECCIA																										60		120	90	0.4
D388465		USGS		Geochemistry of rock samples from the National Geochemical Database: U.S. Geological Survey, Reston, VA.	U.S. Geological Survey	USGS		54.7092	-163.302	0.01				ES	SEDIMENTARY	UNKNOWN	UNKNOWN	BRECCIA																						5	1000	7	20	50				0.5
D388466		USGS		Geochemistry of rock samples from the National Geochemical Database: U.S. Geological Survey, Reston, VA.	U.S. Geological Survey	USGS		54.7083	-163.299	0.01				AAS	SEDIMENTARY	UNKNOWN	UNKNOWN	BRECCIA																										50		100	30	0.4
D388466		USGS		Geochemistry of rock samples from the National Geochemical Database: U.S. Geological Survey, Reston, VA.	U.S. Geological Survey	USGS		54.7083	-163.299	0.01				ES	SEDIMENTARY	UNKNOWN	UNKNOWN	BRECCIA																						3	700	10	20	50				0.5
D388476		USGS		Geochemistry of rock samples from the National Geochemical Database: U.S. Geological Survey, Reston, VA.	U.S. Geological Survey	USGS		54.6436	-163.507	0.01				AAS	SEDIMENTARY	UNKNOWN	UNKNOWN	BRECCIA																										15	0.2	65	20	0.1
D388476		USGS		Geochemistry of rock samples from the National Geochemical Database: U.S. Geological Survey, Reston, VA.	U.S. Geological Survey	USGS		54.6436	-163.507	0.01				ES	SEDIMENTARY	UNKNOWN	UNKNOWN	BRECCIA																						3	500			15
D388477		USGS		Geochemistry of rock samples from the National Geochemical Database: U.S. Geological Survey, Reston, VA.	U.S. Geological Survey	USGS		54.6436	-163.507	0.01				AAS	SEDIMENTARY	UNKNOWN	UNKNOWN	BRECCIA																										35	0.4	45	10	0.15
D388477		USGS		Geochemistry of rock samples from the National Geochemical Database: U.S. Geological Survey, Reston, VA.	U.S. Geological Survey	USGS		54.6436	-163.507	0.01				ES	SEDIMENTARY	UNKNOWN	UNKNOWN	BRECCIA																						5	500		15	30
D388478		USGS		Geochemistry of rock samples from the National Geochemical Database: U.S. Geological Survey, Reston, VA.	U.S. Geological Survey	USGS		54.8589	-163.452	0.01				AAS	SEDIMENTARY	UNKNOWN	UNKNOWN	BRECCIA																										15	0.2	25	20	0.1
D388478		USGS		Geochemistry of rock samples from the National Geochemical Database: U.S. Geological Survey, Reston, VA.	U.S. Geological Survey	USGS		54.8589	-163.452	0.01				ES	SEDIMENTARY	UNKNOWN	UNKNOWN	BRECCIA																						5	300			15
D388479		USGS		Geochemistry of rock samples from the National Geochemical Database: U.S. Geological Survey, Reston, VA.	U.S. Geological Survey	USGS		54.86	-163.453	0.01				AAS	SEDIMENTARY	UNKNOWN	UNKNOWN	BRECCIA																										10	0.8	90	40	0.1
D388479		USGS		Geochemistry of rock samples from the National Geochemical Database: U.S. Geological Survey, Reston, VA.	U.S. Geological Survey	USGS		54.86	-163.453	0.01				ES	SEDIMENTARY	UNKNOWN	UNKNOWN	BRECCIA																						1.5	50			10
D388480		USGS		Geochemistry of rock samples from the National Geochemical Database: U.S. Geological Survey, Reston, VA.	U.S. Geological Survey	USGS		54.8606	-163.454	0.01				AAS	SEDIMENTARY	UNKNOWN	UNKNOWN	BRECCIA																										10	0.1	30	30	0.1
D388480		USGS		Geochemistry of rock samples from the National Geochemical Database: U.S. Geological Survey, Reston, VA.	U.S. Geological Survey	USGS		54.8606	-163.454	0.01				ES	SEDIMENTARY	UNKNOWN	UNKNOWN	BRECCIA																						5	70		10	15
D388481		USGS		Geochemistry of rock samples from the National Geochemical Database: U.S. Geological Survey, Reston, VA.	U.S. Geological Survey	USGS		54.8703	-163.441	0.01				AAS	SEDIMENTARY	UNKNOWN	UNKNOWN	BRECCIA																										20	0.2	45	30	0.15
D388481		USGS		Geochemistry of rock samples from the National Geochemical Database: U.S. Geological Survey, Reston, VA.	U.S. Geological Survey	USGS		54.8703	-163.441	0.01				ES	SEDIMENTARY	UNKNOWN	UNKNOWN	BRECCIA																						5	500		10	20
D389008		USGS		Geochemistry of rock samples from the National Geochemical Database: U.S. Geological Survey, Reston, VA.	U.S. Geological Survey	USGS		36.0675	-112.786	0.01	71	71	71	AAS	SEDIMENTARY	UNKNOWN	UNKNOWN	BRECCIA
D389008		USGS		Geochemistry of rock samples from the National Geochemical Database: U.S. Geological Survey, Reston, VA.	U.S. Geological Survey	USGS		36.0675	-112.786	0.01	71	71	71	DNAA	SEDIMENTARY	UNKNOWN	UNKNOWN	BRECCIA
D389008		USGS		Geochemistry of rock samples from the National Geochemical Database: U.S. Geological Survey, Reston, VA.	U.S. Geological Survey	USGS		36.0675	-112.786	0.01	71	71	71	ICPAES	SEDIMENTARY	UNKNOWN	UNKNOWN	BRECCIA																						0.36	260	4		3		46
D389008		USGS		Geochemistry of rock samples from the National Geochemical Database: U.S. Geological Survey, Reston, VA.	U.S. Geological Survey	USGS		36.0675	-112.786	0.01	71	71	71	ISE	SEDIMENTARY	UNKNOWN	UNKNOWN	BRECCIA
D389008		USGS		Geochemistry of rock samples from the National Geochemical Database: U.S. Geological Survey, Reston, VA.	U.S. Geological Survey	USGS		36.0675	-112.786	0.01	71	71	71	MISC	SEDIMENTARY	UNKNOWN	UNKNOWN	BRECCIA																	33.5
D389008		USGS		Geochemistry of rock samples from the National Geochemical Database: U.S. Geological Survey, Reston, VA.	U.S. Geological Survey	USGS		36.0675	-112.786	0.01	71	71	71	NAA	SEDIMENTARY	UNKNOWN	UNKNOWN	BRECCIA																						0.384			0.56			50
D389008		USGS		Geochemistry of rock samples from the National Geochemical Database: U.S. Geological Survey, Reston, VA.	U.S. Geological Survey	USGS		36.0675	-112.786	0.01	71	71	71	XRF	SEDIMENTARY	UNKNOWN	UNKNOWN	BRECCIA		24.9	0.1	1.61						0.04	15.1	22.5		0.57	0.56
D389439		USGS		Geochemistry of rock samples from the National Geochemical Database: U.S. Geological Survey, Reston, VA.	U.S. Geological Survey	USGS		61.0925	-155.138	0.01				AAS	SEDIMENTARY	UNKNOWN	UNKNOWN	BRECCIA
D389439		USGS		Geochemistry of rock samples from the National Geochemical Database: U.S. Geological Survey, Reston, VA.	U.S. Geological Survey	USGS		61.0925	-155.138	0.01				ES	SEDIMENTARY	UNKNOWN	UNKNOWN	BRECCIA																						0.7	150	7		50
D389439		USGS		Geochemistry of rock samples from the National Geochemical Database: U.S. Geological Survey, Reston, VA.	U.S. Geological Survey	USGS		61.0925	-155.138	0.01				ICPAES	SEDIMENTARY	UNKNOWN	UNKNOWN	BRECCIA																										100	0.4	48	16	0.11
D389458		USGS		Geochemistry of rock samples from the National Geochemical Database: U.S. Geological Survey, Reston, VA.	U.S. Geological Survey	USGS		61.6292	-155.076	0.01				AAS	SEDIMENTARY	UNKNOWN	UNKNOWN	BRECCIA
D389458		USGS		Geochemistry of rock samples from the National Geochemical Database: U.S. Geological Survey, Reston, VA.	U.S. Geological Survey	USGS		61.6292	-155.076	0.01				ES	SEDIMENTARY	UNKNOWN	UNKNOWN	BRECCIA																						3	1000	7		7
D389458		USGS		Geochemistry of rock samples from the National Geochemical Database: U.S. Geological Survey, Reston, VA.	U.S. Geological Survey	USGS		61.6292	-155.076	0.01				ICPAES	SEDIMENTARY	UNKNOWN	UNKNOWN	BRECCIA																										8.4	0.049	24	2.4
D389460		USGS		Geochemistry of rock samples from the National Geochemical Database: U.S. Geological Survey, Reston, VA.	U.S. Geological Survey	USGS		61.0247	-155.306	0.01				AAS	SEDIMENTARY	UNKNOWN	UNKNOWN	BRECCIA
D389460		USGS		Geochemistry of rock samples from the National Geochemical Database: U.S. Geological Survey, Reston, VA.	U.S. Geological Survey	USGS		61.0247	-155.306	0.01				ES	SEDIMENTARY	UNKNOWN	UNKNOWN	BRECCIA																						0.7	70	7		15
D389460		USGS		Geochemistry of rock samples from the National Geochemical Database: U.S. Geological Survey, Reston, VA.	U.S. Geological Survey	USGS		61.0247	-155.306	0.01				ICPAES	SEDIMENTARY	UNKNOWN	UNKNOWN	BRECCIA																										9.7	0.055	29	2.3
D389633		USGS		Geochemistry of rock samples from the National Geochemical Database: U.S. Geological Survey, Reston, VA.	U.S. Geological Survey	USGS		57.8347	-134.221	0.01	43	43	43	AAS	SEDIMENTARY	UNKNOWN	UNKNOWN	BRECCIA
D389633		USGS		Geochemistry of rock samples from the National Geochemical Database: U.S. Geological Survey, Reston, VA.	U.S. Geological Survey	USGS		57.8347	-134.221	0.01	43	43	43	ICPAES	SEDIMENTARY	UNKNOWN	UNKNOWN	BRECCIA																						7.2	1100	130	56	11	0.034	64	13
D389634		USGS		Geochemistry of rock samples from the National Geochemical Database: U.S. Geological Survey, Reston, VA.	U.S. Geological Survey	USGS		57.8353	-134.213	0.01	43	43	43	AAS	SEDIMENTARY	UNKNOWN	UNKNOWN	BRECCIA
D389634		USGS		Geochemistry of rock samples from the National Geochemical Database: U.S. Geological Survey, Reston, VA.	U.S. Geological Survey	USGS		57.8353	-134.213	0.01	43	43	43	ICPAES	SEDIMENTARY	UNKNOWN	UNKNOWN	BRECCIA																						3.7	2100	10	16	9.1	0.023	35	2.3
D389665		USGS		Geochemistry of rock samples from the National Geochemical Database: U.S. Geological Survey, Reston, VA.	U.S. Geological Survey	USGS		57.8272	-134.398	0.01	43	43	43	AAS	SEDIMENTARY	UNKNOWN	UNKNOWN	BRECCIA
D389665		USGS		Geochemistry of rock samples from the National Geochemical Database: U.S. Geological Survey, Reston, VA.	U.S. Geological Survey	USGS		57.8272	-134.398	0.01	43	43	43	ICPAES	SEDIMENTARY	UNKNOWN	UNKNOWN	BRECCIA																						9.6	1500	110	150	19	0.041	14		0.14
D391445		USGS		Geochemistry of rock samples from the National Geochemical Database: U.S. Geological Survey, Reston, VA.	U.S. Geological Survey	USGS		57.5089	-134.011	0.01	43	43	43	AAS	SEDIMENTARY	UNKNOWN	UNKNOWN	BRECCIA
D391445		USGS		Geochemistry of rock samples from the National Geochemical Database: U.S. Geological Survey, Reston, VA.	U.S. Geological Survey	USGS		57.5089	-134.011	0.01	43	43	43	ICPAES	SEDIMENTARY	UNKNOWN	UNKNOWN	BRECCIA																						5.3	1500	35	27	44		24
D391448		USGS		Geochemistry of rock samples from the National Geochemical Database: U.S. Geological Survey, Reston, VA.	U.S. Geological Survey	USGS		57.5089	-134.011	0.01	43	43	43	AAS	SEDIMENTARY	UNKNOWN	UNKNOWN	BRECCIA
D391448		USGS		Geochemistry of rock samples from the National Geochemical Database: U.S. Geological Survey, Reston, VA.	U.S. Geological Survey	USGS		57.5089	-134.011	0.01	43	43	43	ICPAES	SEDIMENTARY	UNKNOWN	UNKNOWN	BRECCIA																						21	11000	89	69	1300	82	12000		3.3
D391451		USGS		Geochemistry of rock samples from the National Geochemical Database: U.S. Geological Survey, Reston, VA.	U.S. Geological Survey	USGS		57.5089	-134.011	0.01	43	43	43	AAS	SEDIMENTARY	UNKNOWN	UNKNOWN	BRECCIA
D391451		USGS		Geochemistry of rock samples from the National Geochemical Database: U.S. Geological Survey, Reston, VA.	U.S. Geological Survey	USGS		57.5089	-134.011	0.01	43	43	43	ICPAES	SEDIMENTARY	UNKNOWN	UNKNOWN	BRECCIA																						17	9000	47	36	3100	65	6200		2.4
D391456		USGS		Geochemistry of rock samples from the National Geochemical Database: U.S. Geological Survey, Reston, VA.	U.S. Geological Survey	USGS		57.5089	-134.011	0.01	43	43	43	AAS	SEDIMENTARY	UNKNOWN	UNKNOWN	BRECCIA
D391456		USGS		Geochemistry of rock samples from the National Geochemical Database: U.S. Geological Survey, Reston, VA.	U.S. Geological Survey	USGS		57.5089	-134.011	0.01	43	43	43	ICPAES	SEDIMENTARY	UNKNOWN	UNKNOWN	BRECCIA																						2.3	2500	39	14	350	1.2	53		1.3
D391460		USGS		Geochemistry of rock samples from the National Geochemical Database: U.S. Geological Survey, Reston, VA.	U.S. Geological Survey	USGS		57.5089	-134.011	0.01	43	43	43	AAS	SEDIMENTARY	UNKNOWN	UNKNOWN	BRECCIA
D391460		USGS		Geochemistry of rock samples from the National Geochemical Database: U.S. Geological Survey, Reston, VA.	U.S. Geological Survey	USGS		57.5089	-134.011	0.01	43	43	43	ICPAES	SEDIMENTARY	UNKNOWN	UNKNOWN	BRECCIA																						9.2	7000	19	16	3500	3.8	73		1.3
D391466		USGS		Geochemistry of rock samples from the National Geochemical Database: U.S. Geological Survey, Reston, VA.	U.S. Geological Survey	USGS		57.5089	-134.011	0.01	43	43	43	AAS	SEDIMENTARY	UNKNOWN	UNKNOWN	BRECCIA
D391466		USGS		Geochemistry of rock samples from the National Geochemical Database: U.S. Geological Survey, Reston, VA.	U.S. Geological Survey	USGS		57.5089	-134.011	0.01	43	43	43	ICPAES	SEDIMENTARY	UNKNOWN	UNKNOWN	BRECCIA																						3.9	4200	20	16	1000	3.8	150		2
D391470		USGS		Geochemistry of rock samples from the National Geochemical Database: U.S. Geological Survey, Reston, VA.	U.S. Geological Survey	USGS		57.5089	-134.011	0.01	43	43	43	AAS	SEDIMENTARY	UNKNOWN	UNKNOWN	BRECCIA
D391470		USGS		Geochemistry of rock samples from the National Geochemical Database: U.S. Geological Survey, Reston, VA.	U.S. Geological Survey	USGS		57.5089	-134.011	0.01	43	43	43	ICPAES	SEDIMENTARY	UNKNOWN	UNKNOWN	BRECCIA																						15	3300	32	31	200000	39	240	84	87
D391471		USGS		Geochemistry of rock samples from the National Geochemical Database: U.S. Geological Survey, Reston, VA.	U.S. Geological Survey	USGS		57.5089	-134.011	0.01	43	43	43	AAS	SEDIMENTARY	UNKNOWN	UNKNOWN	BRECCIA
D391471		USGS		Geochemistry of rock samples from the National Geochemical Database: U.S. Geological Survey, Reston, VA.	U.S. Geological Survey	USGS		57.5089	-134.011	0.01	43	43	43	ICPAES	SEDIMENTARY	UNKNOWN	UNKNOWN	BRECCIA																						12	7500	51	42	890	0.94	110
D391472		USGS		Geochemistry of rock samples from the National Geochemical Database: U.S. Geological Survey, Reston, VA.	U.S. Geological Survey	USGS		57.5089	-134.011	0.01	43	43	43	AAS	SEDIMENTARY	UNKNOWN	UNKNOWN	BRECCIA
D391472		USGS		Geochemistry of rock samples from the National Geochemical Database: U.S. Geological Survey, Reston, VA.	U.S. Geological Survey	USGS		57.5089	-134.011	0.01	43	43	43	ICPAES	SEDIMENTARY	UNKNOWN	UNKNOWN	BRECCIA																						6.1	4700	22	19	3700	1.3	77
D391478		USGS		Geochemistry of rock samples from the National Geochemical Database: U.S. Geological Survey, Reston, VA.	U.S. Geological Survey	USGS		57.5089	-134.011	0.01	43	43	43	AAS	SEDIMENTARY	UNKNOWN	UNKNOWN	BRECCIA
D391478		USGS		Geochemistry of rock samples from the National Geochemical Database: U.S. Geological Survey, Reston, VA.	U.S. Geological Survey	USGS		57.5089	-134.011	0.01	43	43	43	ICPAES	SEDIMENTARY	UNKNOWN	UNKNOWN	BRECCIA																						3.9	230	8	6	5.4		7
D391479		USGS		Geochemistry of rock samples from the National Geochemical Database: U.S. Geological Survey, Reston, VA.	U.S. Geological Survey	USGS		57.5089	-134.011	0.01	43	43	43	AAS	SEDIMENTARY	UNKNOWN	UNKNOWN	BRECCIA
D391479		USGS		Geochemistry of rock samples from the National Geochemical Database: U.S. Geological Survey, Reston, VA.	U.S. Geological Survey	USGS		57.5089	-134.011	0.01	43	43	43	ICPAES	SEDIMENTARY	UNKNOWN	UNKNOWN	BRECCIA																						9.5	1100	21	20	24		28	13
D392751		USGS		Geochemistry of rock samples from the National Geochemical Database: U.S. Geological Survey, Reston, VA.	U.S. Geological Survey	USGS		34.25	-113.5	0.01	8	9.5	11	NAA	SEDIMENTARY	UNKNOWN	UNKNOWN	BRECCIA																						1.15		12	19.4			660	6020
D392756		USGS		Geochemistry of rock samples from the National Geochemical Database: U.S. Geological Survey, Reston, VA.	U.S. Geological Survey	USGS		34.25	-113.5	0.01	8	9.5	11	NAA	SEDIMENTARY	UNKNOWN	UNKNOWN	BRECCIA																						0.228		8.39	4.11			73.5	148
D398828		USGS		Geochemistry of rock samples from the National Geochemical Database: U.S. Geological Survey, Reston, VA.	U.S. Geological Survey	USGS		33.1006	-109.786	0.01	3	3	3	ICPAES	SEDIMENTARY	UNKNOWN	UNKNOWN	BRECCIA																						2.4	580	78	16	21		41
D398828		USGS		Geochemistry of rock samples from the National Geochemical Database: U.S. Geological Survey, Reston, VA.	U.S. Geological Survey	USGS		33.1006	-109.786	0.01	3	3	3	MISC	SEDIMENTARY	UNKNOWN	UNKNOWN	BRECCIA																	5.23
D398828		USGS		Geochemistry of rock samples from the National Geochemical Database: U.S. Geological Survey, Reston, VA.	U.S. Geological Survey	USGS		33.1006	-109.786	0.01	3	3	3	XRF	SEDIMENTARY	UNKNOWN	UNKNOWN	BRECCIA		64.3	0.51	13.8						0.08	2.12	3.53	2.48	3.52	0.21
D501862		USGS		Geochemistry of rock samples from the National Geochemical Database: U.S. Geological Survey, Reston, VA.	U.S. Geological Survey	USGS		53.75	22.8333	0.01				DNAA	SEDIMENTARY	UNKNOWN	UNKNOWN	BRECCIA
D501862		USGS		Geochemistry of rock samples from the National Geochemical Database: U.S. Geological Survey, Reston, VA.	U.S. Geological Survey	USGS		53.75	22.8333	0.01				ICPAES	SEDIMENTARY	UNKNOWN	UNKNOWN	BRECCIA																						5.9	2700	42	28	90		200	10
D501862		USGS		Geochemistry of rock samples from the National Geochemical Database: U.S. Geological Survey, Reston, VA.	U.S. Geological Survey	USGS		53.75	22.8333	0.01				MS	SEDIMENTARY	UNKNOWN	UNKNOWN	BRECCIA
D505906		USGS		Geochemistry of rock samples from the National Geochemical Database: U.S. Geological Survey, Reston, VA.	U.S. Geological Survey	USGS		36.0675	-112.786	0.01	71	71	71	AAS	SEDIMENTARY	UNKNOWN	UNKNOWN	BRECCIA
D505906		USGS		Geochemistry of rock samples from the National Geochemical Database: U.S. Geological Survey, Reston, VA.	U.S. Geological Survey	USGS		36.0675	-112.786	0.01	71	71	71	DNAA	SEDIMENTARY	UNKNOWN	UNKNOWN	BRECCIA
D505906		USGS		Geochemistry of rock samples from the National Geochemical Database: U.S. Geological Survey, Reston, VA.	U.S. Geological Survey	USGS		36.0675	-112.786	0.01	71	71	71	ICPAES	SEDIMENTARY	UNKNOWN	UNKNOWN	BRECCIA																						2.9	640	100	32	7		16	490
D505906		USGS		Geochemistry of rock samples from the National Geochemical Database: U.S. Geological Survey, Reston, VA.	U.S. Geological Survey	USGS		36.0675	-112.786	0.01	71	71	71	ISE	SEDIMENTARY	UNKNOWN	UNKNOWN	BRECCIA
D505906		USGS		Geochemistry of rock samples from the National Geochemical Database: U.S. Geological Survey, Reston, VA.	U.S. Geological Survey	USGS		36.0675	-112.786	0.01	71	71	71	MISC	SEDIMENTARY	UNKNOWN	UNKNOWN	BRECCIA																	30.1
D505906		USGS		Geochemistry of rock samples from the National Geochemical Database: U.S. Geological Survey, Reston, VA.	U.S. Geological Survey	USGS		36.0675	-112.786	0.01	71	71	71	NAA	SEDIMENTARY	UNKNOWN	UNKNOWN	BRECCIA																						2.86		82	27.2			16
D505906		USGS		Geochemistry of rock samples from the National Geochemical Database: U.S. Geological Survey, Reston, VA.	U.S. Geological Survey	USGS		36.0675	-112.786	0.01	71	71	71	XRF	SEDIMENTARY	UNKNOWN	UNKNOWN	BRECCIA		28.5	0.13	1.88						0.08	12.5	20.5		0.51	0.06
D505912		USGS		Geochemistry of rock samples from the National Geochemical Database: U.S. Geological Survey, Reston, VA.	U.S. Geological Survey	USGS		36.0675	-112.786	0.01	71	71	71	AAS	SEDIMENTARY	UNKNOWN	UNKNOWN	BRECCIA
D505912		USGS		Geochemistry of rock samples from the National Geochemical Database: U.S. Geological Survey, Reston, VA.	U.S. Geological Survey	USGS		36.0675	-112.786	0.01	71	71	71	DNAA	SEDIMENTARY	UNKNOWN	UNKNOWN	BRECCIA
D505912		USGS		Geochemistry of rock samples from the National Geochemical Database: U.S. Geological Survey, Reston, VA.	U.S. Geological Survey	USGS		36.0675	-112.786	0.01	71	71	71	ICPAES	SEDIMENTARY	UNKNOWN	UNKNOWN	BRECCIA																						2.5	210	17	6			19	29
D505912		USGS		Geochemistry of rock samples from the National Geochemical Database: U.S. Geological Survey, Reston, VA.	U.S. Geological Survey	USGS		36.0675	-112.786	0.01	71	71	71	ISE	SEDIMENTARY	UNKNOWN	UNKNOWN	BRECCIA
D505912		USGS		Geochemistry of rock samples from the National Geochemical Database: U.S. Geological Survey, Reston, VA.	U.S. Geological Survey	USGS		36.0675	-112.786	0.01	71	71	71	MISC	SEDIMENTARY	UNKNOWN	UNKNOWN	BRECCIA																	8.36
D505912		USGS		Geochemistry of rock samples from the National Geochemical Database: U.S. Geological Survey, Reston, VA.	U.S. Geological Survey	USGS		36.0675	-112.786	0.01	71	71	71	NAA	SEDIMENTARY	UNKNOWN	UNKNOWN	BRECCIA																						2.48			4.11			21
D505912		USGS		Geochemistry of rock samples from the National Geochemical Database: U.S. Geological Survey, Reston, VA.	U.S. Geological Survey	USGS		36.0675	-112.786	0.01	71	71	71	XRF	SEDIMENTARY	UNKNOWN	UNKNOWN	BRECCIA		66	0.68	10.4						0.03	3.42	4.13		3.15	0.07
D505941		USGS		Geochemistry of rock samples from the National Geochemical Database: U.S. Geological Survey, Reston, VA.	U.S. Geological Survey	USGS		36.0767	-112.786	0.01	71	71	71	AAS	SEDIMENTARY	UNKNOWN	UNKNOWN	BRECCIA
D505941		USGS		Geochemistry of rock samples from the National Geochemical Database: U.S. Geological Survey, Reston, VA.	U.S. Geological Survey	USGS		36.0767	-112.786	0.01	71	71	71	DNAA	SEDIMENTARY	UNKNOWN	UNKNOWN	BRECCIA
D505941		USGS		Geochemistry of rock samples from the National Geochemical Database: U.S. Geological Survey, Reston, VA.	U.S. Geological Survey	USGS		36.0767	-112.786	0.01	71	71	71	ICPAES	SEDIMENTARY	UNKNOWN	UNKNOWN	BRECCIA																						1.4	110	51	5	11		190	320
D505941		USGS		Geochemistry of rock samples from the National Geochemical Database: U.S. Geological Survey, Reston, VA.	U.S. Geological Survey	USGS		36.0767	-112.786	0.01	71	71	71	ISE	SEDIMENTARY	UNKNOWN	UNKNOWN	BRECCIA
D505941		USGS		Geochemistry of rock samples from the National Geochemical Database: U.S. Geological Survey, Reston, VA.	U.S. Geological Survey	USGS		36.0767	-112.786	0.01	71	71	71	MISC	SEDIMENTARY	UNKNOWN	UNKNOWN	BRECCIA																	6.28
D505941		USGS		Geochemistry of rock samples from the National Geochemical Database: U.S. Geological Survey, Reston, VA.	U.S. Geological Survey	USGS		36.0767	-112.786	0.01	71	71	71	NAA	SEDIMENTARY	UNKNOWN	UNKNOWN	BRECCIA																						1.39		46	3.8			170
D505941		USGS		Geochemistry of rock samples from the National Geochemical Database: U.S. Geological Survey, Reston, VA.	U.S. Geological Survey	USGS		36.0767	-112.786	0.01	71	71	71	XRF	SEDIMENTARY	UNKNOWN	UNKNOWN	BRECCIA		73.5	0.4	6.78						0.02	2.81	3.83		2.37	0.15
D515165		USGS		Geochemistry of rock samples from the National Geochemical Database: U.S. Geological Survey, Reston, VA.	U.S. Geological Survey	USGS		61.4181	-154.814	0.01				ES	SEDIMENTARY	UNKNOWN	UNKNOWN	BRECCIA																						0.15	70	7		5
D515165		USGS		Geochemistry of rock samples from the National Geochemical Database: U.S. Geological Survey, Reston, VA.	U.S. Geological Survey	USGS		61.4181	-154.814	0.01				ICPAES	SEDIMENTARY	UNKNOWN	UNKNOWN	BRECCIA																										1		2.4	6.1
D516540		USGS		Geochemistry of rock samples from the National Geochemical Database: U.S. Geological Survey, Reston, VA.	U.S. Geological Survey	USGS		57.4772	-133.967	0.01	43	43	43	ICPAES	SEDIMENTARY	UNKNOWN	UNKNOWN	BRECCIA																						2.7	680	10	7	0.51		13
D516540		USGS		Geochemistry of rock samples from the National Geochemical Database: U.S. Geological Survey, Reston, VA.	U.S. Geological Survey	USGS		57.4772	-133.967	0.01	43	43	43	MISC	SEDIMENTARY	UNKNOWN	UNKNOWN	BRECCIA																	6.18
D516540		USGS		Geochemistry of rock samples from the National Geochemical Database: U.S. Geological Survey, Reston, VA.	U.S. Geological Survey	USGS		57.4772	-133.967	0.01	43	43	43	TITR	SEDIMENTARY	UNKNOWN	UNKNOWN	BRECCIA								1.78
D516540		USGS		Geochemistry of rock samples from the National Geochemical Database: U.S. Geological Survey, Reston, VA.	U.S. Geological Survey	USGS		57.4772	-133.967	0.01	43	43	43	XRF	SEDIMENTARY	UNKNOWN	UNKNOWN	BRECCIA		71.2	0.37	9.62						0.09	1.97	3.05	0.39	2.54	0.14
D516541		USGS		Geochemistry of rock samples from the National Geochemical Database: U.S. Geological Survey, Reston, VA.	U.S. Geological Survey	USGS		57.4772	-133.969	0.01	43	43	43	AAS	SEDIMENTARY	UNKNOWN	UNKNOWN	BRECCIA
D516541		USGS		Geochemistry of rock samples from the National Geochemical Database: U.S. Geological Survey, Reston, VA.	U.S. Geological Survey	USGS		57.4772	-133.969	0.01	43	43	43	ICPAES	SEDIMENTARY	UNKNOWN	UNKNOWN	BRECCIA																						5	1700	52	30	120	4.2	380	81	0.43
D516549		USGS		Geochemistry of rock samples from the National Geochemical Database: U.S. Geological Survey, Reston, VA.	U.S. Geological Survey	USGS		57.4806	-133.977	0.01	43	43	43	AAS	SEDIMENTARY	UNKNOWN	UNKNOWN	BRECCIA
D516549		USGS		Geochemistry of rock samples from the National Geochemical Database: U.S. Geological Survey, Reston, VA.	U.S. Geological Survey	USGS		57.4806	-133.977	0.01	43	43	43	COL	SEDIMENTARY	UNKNOWN	UNKNOWN	BRECCIA
D516549		USGS		Geochemistry of rock samples from the National Geochemical Database: U.S. Geological Survey, Reston, VA.	U.S. Geological Survey	USGS		57.4806	-133.977	0.01	43	43	43	ICPAES	SEDIMENTARY	UNKNOWN	UNKNOWN	BRECCIA																						1.4	770	9	7	36	0.13	19	5.7
D522814		USGS		Geochemistry of rock samples from the National Geochemical Database: U.S. Geological Survey, Reston, VA.	U.S. Geological Survey	USGS		60.9789	-147.178	0.01				AAS	SEDIMENTARY	UNKNOWN	UNKNOWN	BRECCIA
D522814		USGS		Geochemistry of rock samples from the National Geochemical Database: U.S. Geological Survey, Reston, VA.	U.S. Geological Survey	USGS		60.9789	-147.178	0.01				ES	SEDIMENTARY	UNKNOWN	UNKNOWN	BRECCIA																						0.7	300
D522814		USGS		Geochemistry of rock samples from the National Geochemical Database: U.S. Geological Survey, Reston, VA.	U.S. Geological Survey	USGS		60.9789	-147.178	0.01				ICPAES	SEDIMENTARY	UNKNOWN	UNKNOWN	BRECCIA																										0.17		9
D535007		USGS		Geochemistry of rock samples from the National Geochemical Database: U.S. Geological Survey, Reston, VA.	U.S. Geological Survey	USGS		44.5669	-117.028	0.01				DNAA	SEDIMENTARY	UNKNOWN	UNKNOWN	BRECCIA
D535007		USGS		Geochemistry of rock samples from the National Geochemical Database: U.S. Geological Survey, Reston, VA.	U.S. Geological Survey	USGS		44.5669	-117.028	0.01				ICPAES	SEDIMENTARY	UNKNOWN	UNKNOWN	BRECCIA																						3.6	940	6	15	25	0.24	110	9.5	0.11
D535184		USGS		Geochemistry of rock samples from the National Geochemical Database: U.S. Geological Survey, Reston, VA.	U.S. Geological Survey	USGS		61.3203	-158.457	0.01				AAS	SEDIMENTARY	UNKNOWN	UNKNOWN	BRECCIA
D535184		USGS		Geochemistry of rock samples from the National Geochemical Database: U.S. Geological Survey, Reston, VA.	U.S. Geological Survey	USGS		61.3203	-158.457	0.01				ICPAES	SEDIMENTARY	UNKNOWN	UNKNOWN	BRECCIA																						6.5	930	44	47	430	0.074	33	410	0.62
D535202		USGS		Geochemistry of rock samples from the National Geochemical Database: U.S. Geological Survey, Reston, VA.	U.S. Geological Survey	USGS		61.3553	-158.436	0.01				AAS	SEDIMENTARY	UNKNOWN	UNKNOWN	BRECCIA
D535202		USGS		Geochemistry of rock samples from the National Geochemical Database: U.S. Geological Survey, Reston, VA.	U.S. Geological Survey	USGS		61.3553	-158.436	0.01				ICPAES	SEDIMENTARY	UNKNOWN	UNKNOWN	BRECCIA																						2.7	270	5	1	2.8		18	21
D535242		USGS		Geochemistry of rock samples from the National Geochemical Database: U.S. Geological Survey, Reston, VA.	U.S. Geological Survey	USGS		61.4131	-158.333	0.01				AAS	SEDIMENTARY	UNKNOWN	UNKNOWN	BRECCIA
D535242		USGS		Geochemistry of rock samples from the National Geochemical Database: U.S. Geological Survey, Reston, VA.	U.S. Geological Survey	USGS		61.4131	-158.333	0.01				ICPAES	SEDIMENTARY	UNKNOWN	UNKNOWN	BRECCIA																						6.1	510	39	11	40	0.16	120	3.5
D537215		USGS		Geochemistry of rock samples from the National Geochemical Database: U.S. Geological Survey, Reston, VA.	U.S. Geological Survey	USGS		59.8719	-150.537	0.01				AAS	SEDIMENTARY	UNKNOWN	UNKNOWN	BRECCIA
D537215		USGS		Geochemistry of rock samples from the National Geochemical Database: U.S. Geological Survey, Reston, VA.	U.S. Geological Survey	USGS		59.8719	-150.537	0.01				ES	SEDIMENTARY	UNKNOWN	UNKNOWN	BRECCIA																							20			3000				10
D537215		USGS		Geochemistry of rock samples from the National Geochemical Database: U.S. Geological Survey, Reston, VA.	U.S. Geological Survey	USGS		59.8719	-150.537	0.01				ICPAES	SEDIMENTARY	UNKNOWN	UNKNOWN	BRECCIA																										2200	1.5		14000	1.8
D540596		USGS		Geochemistry of rock samples from the National Geochemical Database: U.S. Geological Survey, Reston, VA.	U.S. Geological Survey	USGS		55.1833	-132.267	0.01				ICPAES	SEDIMENTARY	UNKNOWN	UNKNOWN	BRECCIA																						6.8	890	5	22	460		37
D540596		USGS		Geochemistry of rock samples from the National Geochemical Database: U.S. Geological Survey, Reston, VA.	U.S. Geological Survey	USGS		55.1833	-132.267	0.01				MISC	SEDIMENTARY	UNKNOWN	UNKNOWN	BRECCIA																	0.47
D540596		USGS		Geochemistry of rock samples from the National Geochemical Database: U.S. Geological Survey, Reston, VA.	U.S. Geological Survey	USGS		55.1833	-132.267	0.01				NAA	SEDIMENTARY	UNKNOWN	UNKNOWN	BRECCIA																						6.94			19.1			32
D540596		USGS		Geochemistry of rock samples from the National Geochemical Database: U.S. Geological Survey, Reston, VA.	U.S. Geological Survey	USGS		55.1833	-132.267	0.01				TITR	SEDIMENTARY	UNKNOWN	UNKNOWN	BRECCIA								6.15
D540596		USGS		Geochemistry of rock samples from the National Geochemical Database: U.S. Geological Survey, Reston, VA.	U.S. Geological Survey	USGS		55.1833	-132.267	0.01				XRF	SEDIMENTARY	UNKNOWN	UNKNOWN	BRECCIA		61.8	0.54	16.2						0.12	0.41	2.17	7.85	0.13	0.13
D540598		USGS		Geochemistry of rock samples from the National Geochemical Database: U.S. Geological Survey, Reston, VA.	U.S. Geological Survey	USGS		55.1833	-132.267	0.01				ICPAES	SEDIMENTARY	UNKNOWN	UNKNOWN	BRECCIA																						7.3	1300			5		300
D540598		USGS		Geochemistry of rock samples from the National Geochemical Database: U.S. Geological Survey, Reston, VA.	U.S. Geological Survey	USGS		55.1833	-132.267	0.01				NAA	SEDIMENTARY	UNKNOWN	UNKNOWN	BRECCIA																						6.75			0.14			251	1.4
D540598		USGS		Geochemistry of rock samples from the National Geochemical Database: U.S. Geological Survey, Reston, VA.	U.S. Geological Survey	USGS		55.1833	-132.267	0.01				TITR	SEDIMENTARY	UNKNOWN	UNKNOWN	BRECCIA								1.68
D540598		USGS		Geochemistry of rock samples from the National Geochemical Database: U.S. Geological Survey, Reston, VA.	U.S. Geological Survey	USGS		55.1833	-132.267	0.01				XRF	SEDIMENTARY	UNKNOWN	UNKNOWN	BRECCIA		71.3	0.48	8.9						0.16		0.34	4.62	4.27
D540599		USGS		Geochemistry of rock samples from the National Geochemical Database: U.S. Geological Survey, Reston, VA.	U.S. Geological Survey	USGS		55.1833	-132.267	0.01				ICPAES	SEDIMENTARY	UNKNOWN	UNKNOWN	BRECCIA																						3.6	1200	9	2	4		66
D540599		USGS		Geochemistry of rock samples from the National Geochemical Database: U.S. Geological Survey, Reston, VA.	U.S. Geological Survey	USGS		55.1833	-132.267	0.01				MISC	SEDIMENTARY	UNKNOWN	UNKNOWN	BRECCIA																	1.51
D540599		USGS		Geochemistry of rock samples from the National Geochemical Database: U.S. Geological Survey, Reston, VA.	U.S. Geological Survey	USGS		55.1833	-132.267	0.01				NAA	SEDIMENTARY	UNKNOWN	UNKNOWN	BRECCIA																						3.56		11	1.66			59.6	7.4
D540599		USGS		Geochemistry of rock samples from the National Geochemical Database: U.S. Geological Survey, Reston, VA.	U.S. Geological Survey	USGS		55.1833	-132.267	0.01				TITR	SEDIMENTARY	UNKNOWN	UNKNOWN	BRECCIA								3.83
D540599		USGS		Geochemistry of rock samples from the National Geochemical Database: U.S. Geological Survey, Reston, VA.	U.S. Geological Survey	USGS		55.1833	-132.267	0.01				XRF	SEDIMENTARY	UNKNOWN	UNKNOWN	BRECCIA		76	0.26	12						0.16	0.19	0.2	2.78	1.02	0.08
D542209		USGS		Geochemistry of rock samples from the National Geochemical Database: U.S. Geological Survey, Reston, VA.	U.S. Geological Survey	USGS		40.975	-116.375	0.01	59	59	59	AAS	SEDIMENTARY	UNKNOWN	UNKNOWN	BRECCIA
D542209		USGS		Geochemistry of rock samples from the National Geochemical Database: U.S. Geological Survey, Reston, VA.	U.S. Geological Survey	USGS		40.975	-116.375	0.01	59	59	59	ICPAES	SEDIMENTARY	UNKNOWN	UNKNOWN	BRECCIA																						16	18	130	38	15	0.98	33	5900
D542217		USGS		Geochemistry of rock samples from the National Geochemical Database: U.S. Geological Survey, Reston, VA.	U.S. Geological Survey	USGS		40.975	-116.375	0.01	59	59	59	AAS	SEDIMENTARY	UNKNOWN	UNKNOWN	BRECCIA
D542217		USGS		Geochemistry of rock samples from the National Geochemical Database: U.S. Geological Survey, Reston, VA.	U.S. Geological Survey	USGS		40.975	-116.375	0.01	59	59	59	ICPAES	SEDIMENTARY	UNKNOWN	UNKNOWN	BRECCIA																						3.4	13	33	14	16	0.18	7.5	440
D542385		USGS		Geochemistry of rock samples from the National Geochemical Database: U.S. Geological Survey, Reston, VA.	U.S. Geological Survey	USGS		56.65	-133.167	0.01	44	43.5	43	ICPAES	SEDIMENTARY	UNKNOWN	UNKNOWN	BRECCIA																						3.3	1500	4	6	0.33		15
D542385		USGS		Geochemistry of rock samples from the National Geochemical Database: U.S. Geological Survey, Reston, VA.	U.S. Geological Survey	USGS		56.65	-133.167	0.01	44	43.5	43	MISC	SEDIMENTARY	UNKNOWN	UNKNOWN	BRECCIA																	22.3
D542385		USGS		Geochemistry of rock samples from the National Geochemical Database: U.S. Geological Survey, Reston, VA.	U.S. Geological Survey	USGS		56.65	-133.167	0.01	44	43.5	43	MS	SEDIMENTARY	UNKNOWN	UNKNOWN	BRECCIA
D542385		USGS		Geochemistry of rock samples from the National Geochemical Database: U.S. Geological Survey, Reston, VA.	U.S. Geological Survey	USGS		56.65	-133.167	0.01	44	43.5	43	TITR	SEDIMENTARY	UNKNOWN	UNKNOWN	BRECCIA								3.44
D542385		USGS		Geochemistry of rock samples from the National Geochemical Database: U.S. Geological Survey, Reston, VA.	U.S. Geological Survey	USGS		56.65	-133.167	0.01	44	43.5	43	XRF	SEDIMENTARY	UNKNOWN	UNKNOWN	BRECCIA		48.4		0.35						0.18	6.01	17.5		0.02
D542392		USGS		Geochemistry of rock samples from the National Geochemical Database: U.S. Geological Survey, Reston, VA.	U.S. Geological Survey	USGS		56.65	-133.15	0.01	44	43.5	43	ICPAES	SEDIMENTARY	UNKNOWN	UNKNOWN	BRECCIA																						6.4	1900	25	18	37	0.17	50	4.5
D542392		USGS		Geochemistry of rock samples from the National Geochemical Database: U.S. Geological Survey, Reston, VA.	U.S. Geological Survey	USGS		56.65	-133.15	0.01	44	43.5	43	MISC	SEDIMENTARY	UNKNOWN	UNKNOWN	BRECCIA																	32
D542392		USGS		Geochemistry of rock samples from the National Geochemical Database: U.S. Geological Survey, Reston, VA.	U.S. Geological Survey	USGS		56.65	-133.15	0.01	44	43.5	43	MS	SEDIMENTARY	UNKNOWN	UNKNOWN	BRECCIA
D542392		USGS		Geochemistry of rock samples from the National Geochemical Database: U.S. Geological Survey, Reston, VA.	U.S. Geological Survey	USGS		56.65	-133.15	0.01	44	43.5	43	TITR	SEDIMENTARY	UNKNOWN	UNKNOWN	BRECCIA								7.16
D542392		USGS		Geochemistry of rock samples from the National Geochemical Database: U.S. Geological Survey, Reston, VA.	U.S. Geological Survey	USGS		56.65	-133.15	0.01	44	43.5	43	XRF	SEDIMENTARY	UNKNOWN	UNKNOWN	BRECCIA		23.1	0.43	3.23						0.24	8.84	22.3		0.15
D548248		USGS		Geochemistry of rock samples from the National Geochemical Database: U.S. Geological Survey, Reston, VA.	U.S. Geological Survey	USGS		51.8508	-176.648	0.01	3	3	3	AAS	SEDIMENTARY	UNKNOWN	UNKNOWN	BRECCIA
D548220		USGS		Geochemistry of rock samples from the National Geochemical Database: U.S. Geological Survey, Reston, VA.	U.S. Geological Survey	USGS		51.8669	-176.627	0.01	3	3	3	ES	SEDIMENTARY	UNKNOWN	UNKNOWN	BRECCIA																						7	700	70	70	300
D548220		USGS		Geochemistry of rock samples from the National Geochemical Database: U.S. Geological Survey, Reston, VA.	U.S. Geological Survey	USGS		51.8669	-176.627	0.01	3	3	3	ICPAES	SEDIMENTARY	UNKNOWN	UNKNOWN	BRECCIA																						7.9	1200	64	44	110		74	1.5
D548221		USGS		Geochemistry of rock samples from the National Geochemical Database: U.S. Geological Survey, Reston, VA.	U.S. Geological Survey	USGS		51.8669	-176.627	0.01	3	3	3	ES	SEDIMENTARY	UNKNOWN	UNKNOWN	BRECCIA																						7	700	70	70	70
D548221		USGS		Geochemistry of rock samples from the National Geochemical Database: U.S. Geological Survey, Reston, VA.	U.S. Geological Survey	USGS		51.8669	-176.627	0.01	3	3	3	ICPAES	SEDIMENTARY	UNKNOWN	UNKNOWN	BRECCIA																						7.9	1200	68	45	91		73		0.11
D548223		USGS		Geochemistry of rock samples from the National Geochemical Database: U.S. Geological Survey, Reston, VA.	U.S. Geological Survey	USGS		51.8669	-176.627	0.01	3	3	3	AAS	SEDIMENTARY	UNKNOWN	UNKNOWN	BRECCIA
D548223		USGS		Geochemistry of rock samples from the National Geochemical Database: U.S. Geological Survey, Reston, VA.	U.S. Geological Survey	USGS		51.8669	-176.627	0.01	3	3	3	ES	SEDIMENTARY	UNKNOWN	UNKNOWN	BRECCIA																						7	700	100	100	100
D548223		USGS		Geochemistry of rock samples from the National Geochemical Database: U.S. Geological Survey, Reston, VA.	U.S. Geological Survey	USGS		51.8669	-176.627	0.01	3	3	3	ICPAES	SEDIMENTARY	UNKNOWN	UNKNOWN	BRECCIA																						8	1300	170	64	110		59
D548228		USGS		Geochemistry of rock samples from the National Geochemical Database: U.S. Geological Survey, Reston, VA.	U.S. Geological Survey	USGS		51.9056	-176.609	0.01	3	3	3	ES	SEDIMENTARY	UNKNOWN	UNKNOWN	BRECCIA																						1.5	300			5
D548228		USGS		Geochemistry of rock samples from the National Geochemical Database: U.S. Geological Survey, Reston, VA.	U.S. Geological Survey	USGS		51.9056	-176.609	0.01	3	3	3	ICPAES	SEDIMENTARY	UNKNOWN	UNKNOWN	BRECCIA																						1.5	370		2	2.2		47	1.1
D548231		USGS		Geochemistry of rock samples from the National Geochemical Database: U.S. Geological Survey, Reston, VA.	U.S. Geological Survey	USGS		51.9356	-176.616	0.01	3	3	3	ES	SEDIMENTARY	UNKNOWN	UNKNOWN	BRECCIA																						5	700	15	30	50
D548231		USGS		Geochemistry of rock samples from the National Geochemical Database: U.S. Geological Survey, Reston, VA.	U.S. Geological Survey	USGS		51.9356	-176.616	0.01	3	3	3	ICPAES	SEDIMENTARY	UNKNOWN	UNKNOWN	BRECCIA																						5.5	1300	8	21	45		66
D548248		USGS		Geochemistry of rock samples from the National Geochemical Database: U.S. Geological Survey, Reston, VA.	U.S. Geological Survey	USGS		51.8508	-176.648	0.01	3	3	3	ES	SEDIMENTARY	UNKNOWN	UNKNOWN	BRECCIA																						5	1500	70	100	5000	100	5000		20
D548248		USGS		Geochemistry of rock samples from the National Geochemical Database: U.S. Geological Survey, Reston, VA.	U.S. Geological Survey	USGS		51.8508	-176.648	0.01	3	3	3	ICPAES	SEDIMENTARY	UNKNOWN	UNKNOWN	BRECCIA																						8.4	3100	110	84	4700	33	4000		10
D563632		USGS		Geochemistry of rock samples from the National Geochemical Database: U.S. Geological Survey, Reston, VA.	U.S. Geological Survey	USGS		57.2267	-134.542	0.01				ICPAES	SEDIMENTARY	UNKNOWN	UNKNOWN	BRECCIA																						5.7	790	11	26	24		140	23
D563727		USGS		Geochemistry of rock samples from the National Geochemical Database: U.S. Geological Survey, Reston, VA.	U.S. Geological Survey	USGS		57.4278	-133.919	0.01				ICPAES	SEDIMENTARY	UNKNOWN	UNKNOWN	BRECCIA																						5.2	1000	54	34	120		58
D564627		USGS		Geochemistry of rock samples from the National Geochemical Database: U.S. Geological Survey, Reston, VA.	U.S. Geological Survey	USGS		57.8275	-134.296	0.01				ICPAES	SEDIMENTARY	UNKNOWN	UNKNOWN	BRECCIA																						5.3	580	23	20	35	0.06	100	1.7
D570031		USGS		Geochemistry of rock samples from the National Geochemical Database: U.S. Geological Survey, Reston, VA.	U.S. Geological Survey	USGS		61.3958	-157.962	0.01				AAS	SEDIMENTARY	UNKNOWN	UNKNOWN	BRECCIA
D570031		USGS		Geochemistry of rock samples from the National Geochemical Database: U.S. Geological Survey, Reston, VA.	U.S. Geological Survey	USGS		61.3958	-157.962	0.01				ICPAES	SEDIMENTARY	UNKNOWN	UNKNOWN	BRECCIA																						5.3	500	74	16	82		71	10
DAA981		USGS		Geochemistry of rock samples from the National Geochemical Database: U.S. Geological Survey, Reston, VA.	U.S. Geological Survey	USGS		42.9039	-123.177	0.01	44	44	44	AAS	SEDIMENTARY	UNKNOWN	UNKNOWN	BRECCIA
DAA981		USGS		Geochemistry of rock samples from the National Geochemical Database: U.S. Geological Survey, Reston, VA.	U.S. Geological Survey	USGS		42.9039	-123.177	0.01	44	44	44	ES	SEDIMENTARY	UNKNOWN	UNKNOWN	BRECCIA																							1500	70	20	100
DAB238		USGS		Geochemistry of rock samples from the National Geochemical Database: U.S. Geological Survey, Reston, VA.	U.S. Geological Survey	USGS		32.0853	-108.983	0.01				ISE	SEDIMENTARY	UNKNOWN	UNKNOWN	BRECCIA
DAB237		USGS		Geochemistry of rock samples from the National Geochemical Database: U.S. Geological Survey, Reston, VA.	U.S. Geological Survey	USGS		32.0858	-108.974	0.01				AAS	SEDIMENTARY	UNKNOWN	UNKNOWN	BRECCIA																										5		5
DAB237		USGS		Geochemistry of rock samples from the National Geochemical Database: U.S. Geological Survey, Reston, VA.	U.S. Geological Survey	USGS		32.0858	-108.974	0.01				ES	SEDIMENTARY	UNKNOWN	UNKNOWN	BRECCIA																						0.3	100			50
DAB237		USGS		Geochemistry of rock samples from the National Geochemical Database: U.S. Geological Survey, Reston, VA.	U.S. Geological Survey	USGS		32.0858	-108.974	0.01				ISE	SEDIMENTARY	UNKNOWN	UNKNOWN	BRECCIA
DAB238		USGS		Geochemistry of rock samples from the National Geochemical Database: U.S. Geological Survey, Reston, VA.	U.S. Geological Survey	USGS		32.0853	-108.983	0.01				AAS	SEDIMENTARY	UNKNOWN	UNKNOWN	BRECCIA																												5	30
DAB238		USGS		Geochemistry of rock samples from the National Geochemical Database: U.S. Geological Survey, Reston, VA.	U.S. Geological Survey	USGS		32.0853	-108.983	0.01				ES	SEDIMENTARY	UNKNOWN	UNKNOWN	BRECCIA																						0.3	70			15
DAB239		USGS		Geochemistry of rock samples from the National Geochemical Database: U.S. Geological Survey, Reston, VA.	U.S. Geological Survey	USGS		32.1364	-108.972	0.01				AAS	SEDIMENTARY	UNKNOWN	UNKNOWN	BRECCIA																										5		10	10
DAB239		USGS		Geochemistry of rock samples from the National Geochemical Database: U.S. Geological Survey, Reston, VA.	U.S. Geological Survey	USGS		32.1364	-108.972	0.01				ES	SEDIMENTARY	UNKNOWN	UNKNOWN	BRECCIA																						1.5	70	50	7	10
DAB239		USGS		Geochemistry of rock samples from the National Geochemical Database: U.S. Geological Survey, Reston, VA.	U.S. Geological Survey	USGS		32.1364	-108.972	0.01				ISE	SEDIMENTARY	UNKNOWN	UNKNOWN	BRECCIA
DAB267		USGS		Geochemistry of rock samples from the National Geochemical Database: U.S. Geological Survey, Reston, VA.	U.S. Geological Survey	USGS		32.0783	-108.983	0.01				AAS	SEDIMENTARY	UNKNOWN	UNKNOWN	BRECCIA																										15		55	80	2
DAB267		USGS		Geochemistry of rock samples from the National Geochemical Database: U.S. Geological Survey, Reston, VA.	U.S. Geological Survey	USGS		32.0783	-108.983	0.01				ES	SEDIMENTARY	UNKNOWN	UNKNOWN	BRECCIA																						5		30	20	10
DAB267		USGS		Geochemistry of rock samples from the National Geochemical Database: U.S. Geological Survey, Reston, VA.	U.S. Geological Survey	USGS		32.0783	-108.983	0.01				ISE	SEDIMENTARY	UNKNOWN	UNKNOWN	BRECCIA
DAB269		USGS		Geochemistry of rock samples from the National Geochemical Database: U.S. Geological Survey, Reston, VA.	U.S. Geological Survey	USGS		32.08	-108.983	0.01				AAS	SEDIMENTARY	UNKNOWN	UNKNOWN	BRECCIA																										40		60	50
DAB269		USGS		Geochemistry of rock samples from the National Geochemical Database: U.S. Geological Survey, Reston, VA.	U.S. Geological Survey	USGS		32.08	-108.983	0.01				ES	SEDIMENTARY	UNKNOWN	UNKNOWN	BRECCIA																						10	100			70
DAB269		USGS		Geochemistry of rock samples from the National Geochemical Database: U.S. Geological Survey, Reston, VA.	U.S. Geological Survey	USGS		32.08	-108.983	0.01				ISE	SEDIMENTARY	UNKNOWN	UNKNOWN	BRECCIA
DAB277		USGS		Geochemistry of rock samples from the National Geochemical Database: U.S. Geological Survey, Reston, VA.	U.S. Geological Survey	USGS		32.0514	-108.983	0.01				AAS	SEDIMENTARY	UNKNOWN	UNKNOWN	BRECCIA																										5		40
DAB277		USGS		Geochemistry of rock samples from the National Geochemical Database: U.S. Geological Survey, Reston, VA.	U.S. Geological Survey	USGS		32.0514	-108.983	0.01				ES	SEDIMENTARY	UNKNOWN	UNKNOWN	BRECCIA																						0.5	100			10
DAB277		USGS		Geochemistry of rock samples from the National Geochemical Database: U.S. Geological Survey, Reston, VA.	U.S. Geological Survey	USGS		32.0514	-108.983	0.01				ISE	SEDIMENTARY	UNKNOWN	UNKNOWN	BRECCIA
DAB442		USGS		Geochemistry of rock samples from the National Geochemical Database: U.S. Geological Survey, Reston, VA.	U.S. Geological Survey	USGS		32.1081	-109.008	0.01				AAS	SEDIMENTARY	UNKNOWN	UNKNOWN	BRECCIA																										15		35	10	1.5
DAB442		USGS		Geochemistry of rock samples from the National Geochemical Database: U.S. Geological Survey, Reston, VA.	U.S. Geological Survey	USGS		32.1081	-109.008	0.01				ES	SEDIMENTARY	UNKNOWN	UNKNOWN	BRECCIA																						0.1	500	7		30
DAB442		USGS		Geochemistry of rock samples from the National Geochemical Database: U.S. Geological Survey, Reston, VA.	U.S. Geological Survey	USGS		32.1081	-109.008	0.01				ISE	SEDIMENTARY	UNKNOWN	UNKNOWN	BRECCIA
DAB648		USGS		Geochemistry of rock samples from the National Geochemical Database: U.S. Geological Survey, Reston, VA.	U.S. Geological Survey	USGS		32.1628	-109.021	0.01				AAS	SEDIMENTARY	UNKNOWN	UNKNOWN	BRECCIA																										75		25
DAB648		USGS		Geochemistry of rock samples from the National Geochemical Database: U.S. Geological Survey, Reston, VA.	U.S. Geological Survey	USGS		32.1628	-109.021	0.01				ES	SEDIMENTARY	UNKNOWN	UNKNOWN	BRECCIA																						15	20	20	150	200				70
DAB648		USGS		Geochemistry of rock samples from the National Geochemical Database: U.S. Geological Survey, Reston, VA.	U.S. Geological Survey	USGS		32.1628	-109.021	0.01				ISE	SEDIMENTARY	UNKNOWN	UNKNOWN	BRECCIA
DAC296		USGS		Geochemistry of rock samples from the National Geochemical Database: U.S. Geological Survey, Reston, VA.	U.S. Geological Survey	USGS		42.7172	-123.603	0.01	44	44	44	AAS	SEDIMENTARY	UNKNOWN	UNKNOWN	BRECCIA
DAC296		USGS		Geochemistry of rock samples from the National Geochemical Database: U.S. Geological Survey, Reston, VA.	U.S. Geological Survey	USGS		42.7172	-123.603	0.01	44	44	44	ES	SEDIMENTARY	UNKNOWN	UNKNOWN	BRECCIA																							700	20	20	70
DAC569		USGS		Geochemistry of rock samples from the National Geochemical Database: U.S. Geological Survey, Reston, VA.	U.S. Geological Survey	USGS		42.9561	-122.482	0.01				AAS	SEDIMENTARY	UNKNOWN	UNKNOWN	BRECCIA																												10
DAC569		USGS		Geochemistry of rock samples from the National Geochemical Database: U.S. Geological Survey, Reston, VA.	U.S. Geological Survey	USGS		42.9561	-122.482	0.01				COL	SEDIMENTARY	UNKNOWN	UNKNOWN	BRECCIA																													40
DAC569		USGS		Geochemistry of rock samples from the National Geochemical Database: U.S. Geological Survey, Reston, VA.	U.S. Geological Survey	USGS		42.9561	-122.482	0.01				ES	SEDIMENTARY	UNKNOWN	UNKNOWN	BRECCIA																							70			150			500
DAI213		USGS		Geochemistry of rock samples from the National Geochemical Database: U.S. Geological Survey, Reston, VA.	U.S. Geological Survey	USGS		38.5306	-117.806	0.01	44	44	44	ES	SEDIMENTARY	UNKNOWN	UNKNOWN	BRECCIA																						2	3000	5		5			1000
DAI251		USGS		Geochemistry of rock samples from the National Geochemical Database: U.S. Geological Survey, Reston, VA.	U.S. Geological Survey	USGS		38.3717	-117.881	0.01	44	44	44	ES	SEDIMENTARY	UNKNOWN	UNKNOWN	BRECCIA																						5	10	10		2000				1
DAK947		USGS		Geochemistry of rock samples from the National Geochemical Database: U.S. Geological Survey, Reston, VA.	U.S. Geological Survey	USGS		38.1928	-117.697	0.01				AAS	SEDIMENTARY	UNKNOWN	UNKNOWN	BRECCIA																												45	200
DAK947		USGS		Geochemistry of rock samples from the National Geochemical Database: U.S. Geological Survey, Reston, VA.	U.S. Geological Survey	USGS		38.1928	-117.697	0.01				ES	SEDIMENTARY	UNKNOWN	UNKNOWN	BRECCIA																						1.5	150		5	5				20
DAL533		USGS		Geochemistry of rock samples from the National Geochemical Database: U.S. Geological Survey, Reston, VA.	U.S. Geological Survey	USGS		38.8861	-117.809	0.01	3	3	3	AAS	SEDIMENTARY	UNKNOWN	UNKNOWN	BRECCIA																											0.2	10	60
DAL533		USGS		Geochemistry of rock samples from the National Geochemical Database: U.S. Geological Survey, Reston, VA.	U.S. Geological Survey	USGS		38.8861	-117.809	0.01	3	3	3	ES	SEDIMENTARY	UNKNOWN	UNKNOWN	BRECCIA																						2	150	5		50
DAL534		USGS		Geochemistry of rock samples from the National Geochemical Database: U.S. Geological Survey, Reston, VA.	U.S. Geological Survey	USGS		38.8861	-117.809	0.01	3	3	3	AAS	SEDIMENTARY	UNKNOWN	UNKNOWN	BRECCIA																											0.5	25	80
DAL534		USGS		Geochemistry of rock samples from the National Geochemical Database: U.S. Geological Survey, Reston, VA.	U.S. Geological Survey	USGS		38.8861	-117.809	0.01	3	3	3	ES	SEDIMENTARY	UNKNOWN	UNKNOWN	BRECCIA																						3	300	5		200
DAL535		USGS		Geochemistry of rock samples from the National Geochemical Database: U.S. Geological Survey, Reston, VA.	U.S. Geological Survey	USGS		38.8881	-117.809	0.01	3	3	3	AAS	SEDIMENTARY	UNKNOWN	UNKNOWN	BRECCIA																											0.6	15	80
DAL535		USGS		Geochemistry of rock samples from the National Geochemical Database: U.S. Geological Survey, Reston, VA.	U.S. Geological Survey	USGS		38.8881	-117.809	0.01	3	3	3	ES	SEDIMENTARY	UNKNOWN	UNKNOWN	BRECCIA																						3	70	5		200
DAL536		USGS		Geochemistry of rock samples from the National Geochemical Database: U.S. Geological Survey, Reston, VA.	U.S. Geological Survey	USGS		38.8881	-117.809	0.01	3	3	3	AAS	SEDIMENTARY	UNKNOWN	UNKNOWN	BRECCIA																											1.6	25	170
DAL536		USGS		Geochemistry of rock samples from the National Geochemical Database: U.S. Geological Survey, Reston, VA.	U.S. Geological Survey	USGS		38.8881	-117.809	0.01	3	3	3	ES	SEDIMENTARY	UNKNOWN	UNKNOWN	BRECCIA																						5	150			500
DAL726		USGS		Geochemistry of rock samples from the National Geochemical Database: U.S. Geological Survey, Reston, VA.	U.S. Geological Survey	USGS		37.7389	-117.944	0.01	11	11	11	AAS	SEDIMENTARY	UNKNOWN	UNKNOWN	BRECCIA																											1.2	88		2564
DAL726		USGS		Geochemistry of rock samples from the National Geochemical Database: U.S. Geological Survey, Reston, VA.	U.S. Geological Survey	USGS		37.7389	-117.944	0.01	11	11	11	ES	SEDIMENTARY	UNKNOWN	UNKNOWN	BRECCIA																						3	300	20	10	15
EBY258		USGS		Geochemistry of rock samples from the National Geochemical Database: U.S. Geological Survey, Reston, VA.	U.S. Geological Survey	USGS		32.8547	-108.023	0.01				ES	SEDIMENTARY	UNKNOWN	UNKNOWN	BRECCIA																						3		20	20	200	20	1500		20
EDW500		USGS		Geochemistry of rock samples from the National Geochemical Database: U.S. Geological Survey, Reston, VA.	U.S. Geological Survey	USGS		42.8761	-122.868	0.01				ES	SEDIMENTARY	UNKNOWN	UNKNOWN	BRECCIA																						2	700		5	7
EDW504		USGS		Geochemistry of rock samples from the National Geochemical Database: U.S. Geological Survey, Reston, VA.	U.S. Geological Survey	USGS		42.7825	-122.82	0.01				ES	SEDIMENTARY	UNKNOWN	UNKNOWN	BRECCIA																						2	500	7	7	15
EDW507		USGS		Geochemistry of rock samples from the National Geochemical Database: U.S. Geological Survey, Reston, VA.	U.S. Geological Survey	USGS		42.7878	-122.791	0.01				COL	SEDIMENTARY	UNKNOWN	UNKNOWN	BRECCIA																													80
EDW507		USGS		Geochemistry of rock samples from the National Geochemical Database: U.S. Geological Survey, Reston, VA.	U.S. Geological Survey	USGS		42.7878	-122.791	0.01				ES	SEDIMENTARY	UNKNOWN	UNKNOWN	BRECCIA																						0.7	70			5
EDW517		USGS		Geochemistry of rock samples from the National Geochemical Database: U.S. Geological Survey, Reston, VA.	U.S. Geological Survey	USGS		42.965	-122.599	0.01				COL	SEDIMENTARY	UNKNOWN	UNKNOWN	BRECCIA																													10
EDW517		USGS		Geochemistry of rock samples from the National Geochemical Database: U.S. Geological Survey, Reston, VA.	U.S. Geological Survey	USGS		42.965	-122.599	0.01				ES	SEDIMENTARY	UNKNOWN	UNKNOWN	BRECCIA																						2	500	7	7	30
EDW631		USGS		Geochemistry of rock samples from the National Geochemical Database: U.S. Geological Survey, Reston, VA.	U.S. Geological Survey	USGS		42.3106	-122.421	0.01				ES	SEDIMENTARY	UNKNOWN	UNKNOWN	BRECCIA																						7	1000	10	10	20
EDW632		USGS		Geochemistry of rock samples from the National Geochemical Database: U.S. Geological Survey, Reston, VA.	U.S. Geological Survey	USGS		42.3114	-122.43	0.01				ES	SEDIMENTARY	UNKNOWN	UNKNOWN	BRECCIA																						7	700	50	20	50
EEM177		USGS		Geochemistry of rock samples from the National Geochemical Database: U.S. Geological Survey, Reston, VA.	U.S. Geological Survey	USGS		45.7975	-112.514	0.01				AAS	SEDIMENTARY	UNKNOWN	UNKNOWN	BRECCIA																												160
EEM177		USGS		Geochemistry of rock samples from the National Geochemical Database: U.S. Geological Survey, Reston, VA.	U.S. Geological Survey	USGS		45.7975	-112.514	0.01				COL	SEDIMENTARY	UNKNOWN	UNKNOWN	BRECCIA																													20
EEM177		USGS		Geochemistry of rock samples from the National Geochemical Database: U.S. Geological Survey, Reston, VA.	U.S. Geological Survey	USGS		45.7975	-112.514	0.01				ES	SEDIMENTARY	UNKNOWN	UNKNOWN	BRECCIA																						10	1000	10	30	1000				1.5
EEM232		USGS		Geochemistry of rock samples from the National Geochemical Database: U.S. Geological Survey, Reston, VA.	U.S. Geological Survey	USGS		45.5394	-112.187	0.01				AAS	SEDIMENTARY	UNKNOWN	UNKNOWN	BRECCIA																												600
EEM232		USGS		Geochemistry of rock samples from the National Geochemical Database: U.S. Geological Survey, Reston, VA.	U.S. Geological Survey	USGS		45.5394	-112.187	0.01				ES	SEDIMENTARY	UNKNOWN	UNKNOWN	BRECCIA																						10	2000	30	10	700	20	1000	10000	70
EEM570		USGS		Geochemistry of rock samples from the National Geochemical Database: U.S. Geological Survey, Reston, VA.	U.S. Geological Survey	USGS		44.7842	-113.426	0.01				AAS	SEDIMENTARY	UNKNOWN	UNKNOWN	BRECCIA																												190
EEM570		USGS		Geochemistry of rock samples from the National Geochemical Database: U.S. Geological Survey, Reston, VA.	U.S. Geological Survey	USGS		44.7842	-113.426	0.01				COL	SEDIMENTARY	UNKNOWN	UNKNOWN	BRECCIA																													10
EEM570		USGS		Geochemistry of rock samples from the National Geochemical Database: U.S. Geological Survey, Reston, VA.	U.S. Geological Survey	USGS		44.7842	-113.426	0.01				ES	SEDIMENTARY	UNKNOWN	UNKNOWN	BRECCIA																						5	500	30	5	100		300		5
EEM574		USGS		Geochemistry of rock samples from the National Geochemical Database: U.S. Geological Survey, Reston, VA.	U.S. Geological Survey	USGS		44.7892	-113.461	0.01				AAS	SEDIMENTARY	UNKNOWN	UNKNOWN	BRECCIA																												110
EEM574		USGS		Geochemistry of rock samples from the National Geochemical Database: U.S. Geological Survey, Reston, VA.	U.S. Geological Survey	USGS		44.7892	-113.461	0.01				ES	SEDIMENTARY	UNKNOWN	UNKNOWN	BRECCIA																						1.5	700	20	5	10				5
EEM576		USGS		Geochemistry of rock samples from the National Geochemical Database: U.S. Geological Survey, Reston, VA.	U.S. Geological Survey	USGS		44.7875	-113.443	0.01				AAS	SEDIMENTARY	UNKNOWN	UNKNOWN	BRECCIA
EEM576		USGS		Geochemistry of rock samples from the National Geochemical Database: U.S. Geological Survey, Reston, VA.	U.S. Geological Survey	USGS		44.7875	-113.443	0.01				COL	SEDIMENTARY	UNKNOWN	UNKNOWN	BRECCIA																													160
EEM576		USGS		Geochemistry of rock samples from the National Geochemical Database: U.S. Geological Survey, Reston, VA.	U.S. Geological Survey	USGS		44.7875	-113.443	0.01				ES	SEDIMENTARY	UNKNOWN	UNKNOWN	BRECCIA																						7	700	100	50	200	20	2000		20
EEM578		USGS		Geochemistry of rock samples from the National Geochemical Database: U.S. Geological Survey, Reston, VA.	U.S. Geological Survey	USGS		44.7333	-113.4	0.01				AAS	SEDIMENTARY	UNKNOWN	UNKNOWN	BRECCIA																												500
EEM578		USGS		Geochemistry of rock samples from the National Geochemical Database: U.S. Geological Survey, Reston, VA.	U.S. Geological Survey	USGS		44.7333	-113.4	0.01				COL	SEDIMENTARY	UNKNOWN	UNKNOWN	BRECCIA																													10
EEM578		USGS		Geochemistry of rock samples from the National Geochemical Database: U.S. Geological Survey, Reston, VA.	U.S. Geological Survey	USGS		44.7333	-113.4	0.01				ES	SEDIMENTARY	UNKNOWN	UNKNOWN	BRECCIA																						20	2000	200	150		20	700	200
EEM579		USGS		Geochemistry of rock samples from the National Geochemical Database: U.S. Geological Survey, Reston, VA.	U.S. Geological Survey	USGS		44.7333	-113.4	0.01				AAS	SEDIMENTARY	UNKNOWN	UNKNOWN	BRECCIA
EEM579		USGS		Geochemistry of rock samples from the National Geochemical Database: U.S. Geological Survey, Reston, VA.	U.S. Geological Survey	USGS		44.7333	-113.4	0.01				COL	SEDIMENTARY	UNKNOWN	UNKNOWN	BRECCIA																													80
EEM579		USGS		Geochemistry of rock samples from the National Geochemical Database: U.S. Geological Survey, Reston, VA.	U.S. Geological Survey	USGS		44.7333	-113.4	0.01				ES	SEDIMENTARY	UNKNOWN	UNKNOWN	BRECCIA																						10	200	200	50	1000	20	3000
EEM940		USGS		Geochemistry of rock samples from the National Geochemical Database: U.S. Geological Survey, Reston, VA.	U.S. Geological Survey	USGS		45.315	-112.868	0.01				AAS	SEDIMENTARY	UNKNOWN	UNKNOWN	BRECCIA																												200
EEM940		USGS		Geochemistry of rock samples from the National Geochemical Database: U.S. Geological Survey, Reston, VA.	U.S. Geological Survey	USGS		45.315	-112.868	0.01				COL	SEDIMENTARY	UNKNOWN	UNKNOWN	BRECCIA																													200
EEM940		USGS		Geochemistry of rock samples from the National Geochemical Database: U.S. Geological Survey, Reston, VA.	U.S. Geological Survey	USGS		45.315	-112.868	0.01				ES	SEDIMENTARY	UNKNOWN	UNKNOWN	BRECCIA																						2	5000	20	7	20		200	500	15
EEN470		USGS		Geochemistry of rock samples from the National Geochemical Database: U.S. Geological Survey, Reston, VA.	U.S. Geological Survey	USGS		46.1747	-113.244	0.01				AAS	SEDIMENTARY	UNKNOWN	UNKNOWN	BRECCIA																												20
EEN470		USGS		Geochemistry of rock samples from the National Geochemical Database: U.S. Geological Survey, Reston, VA.	U.S. Geological Survey	USGS		46.1747	-113.244	0.01				COL	SEDIMENTARY	UNKNOWN	UNKNOWN	BRECCIA																													40
EEN470		USGS		Geochemistry of rock samples from the National Geochemical Database: U.S. Geological Survey, Reston, VA.	U.S. Geological Survey	USGS		46.1747	-113.244	0.01				ES	SEDIMENTARY	UNKNOWN	UNKNOWN	BRECCIA																						5	200	10		15
EFY775		USGS		Geochemistry of rock samples from the National Geochemical Database: U.S. Geological Survey, Reston, VA.	U.S. Geological Survey	USGS		33.0011	-108.973	0.01	3	3	3	ES	SEDIMENTARY	UNKNOWN	UNKNOWN	BRECCIA																						0.5	200
EGD517		USGS		Geochemistry of rock samples from the National Geochemical Database: U.S. Geological Survey, Reston, VA.	U.S. Geological Survey	USGS		46.4478	-113.611	0.01	72	72	72	AAS	SEDIMENTARY	UNKNOWN	UNKNOWN	BRECCIA																											0.26	1
EGD517		USGS		Geochemistry of rock samples from the National Geochemical Database: U.S. Geological Survey, Reston, VA.	U.S. Geological Survey	USGS		46.4478	-113.611	0.01	72	72	72	ES	SEDIMENTARY	UNKNOWN	UNKNOWN	BRECCIA																						2	300	20	5
EGF073		USGS		Geochemistry of rock samples from the National Geochemical Database: U.S. Geological Survey, Reston, VA.	U.S. Geological Survey	USGS		46.3647	-113.987	0.01	72	72	72	AAS	SEDIMENTARY	UNKNOWN	UNKNOWN	BRECCIA																										900	0.23	1		0.08
EGF073		USGS		Geochemistry of rock samples from the National Geochemical Database: U.S. Geological Survey, Reston, VA.	U.S. Geological Survey	USGS		46.3647	-113.987	0.01	72	72	72	ES	SEDIMENTARY	UNKNOWN	UNKNOWN	BRECCIA																						1	300	500	150	1500
EIB758		USGS		Geochemistry of rock samples from the National Geochemical Database: U.S. Geological Survey, Reston, VA.	U.S. Geological Survey	USGS		43.2186	-109.846	0.01	66	66	66	AAS	SEDIMENTARY	UNKNOWN	UNKNOWN	BRECCIA																												1
EIB758		USGS		Geochemistry of rock samples from the National Geochemical Database: U.S. Geological Survey, Reston, VA.	U.S. Geological Survey	USGS		43.2186	-109.846	0.01	66	66	66	ES	SEDIMENTARY	UNKNOWN	UNKNOWN	BRECCIA																						2	150	10	10
EIC399		USGS		Geochemistry of rock samples from the National Geochemical Database: U.S. Geological Survey, Reston, VA.	U.S. Geological Survey	USGS		44.35	-112.75	0.01				ES	SEDIMENTARY	UNKNOWN	UNKNOWN	BRECCIA																							10
EIW920		USGS		Geochemistry of rock samples from the National Geochemical Database: U.S. Geological Survey, Reston, VA.	U.S. Geological Survey	USGS		44.5281	-115.101	0.01	43	43	43	AAS	SEDIMENTARY	UNKNOWN	UNKNOWN	BRECCIA																											5.2	135	5800
EIW920		USGS		Geochemistry of rock samples from the National Geochemical Database: U.S. Geological Survey, Reston, VA.	U.S. Geological Survey	USGS		44.5281	-115.101	0.01	43	43	43	ES	SEDIMENTARY	UNKNOWN	UNKNOWN	BRECCIA																						5		10		500				1000
EJA370		USGS		Geochemistry of rock samples from the National Geochemical Database: U.S. Geological Survey, Reston, VA.	U.S. Geological Survey	USGS		33.1111	-109.231	0.01	11	11	11	ES	SEDIMENTARY	UNKNOWN	UNKNOWN	BRECCIA																						0.3	1000	5		70
EJA371		USGS		Geochemistry of rock samples from the National Geochemical Database: U.S. Geological Survey, Reston, VA.	U.S. Geological Survey	USGS		33.1111	-109.231	0.01	11	11	11	AAS	SEDIMENTARY	UNKNOWN	UNKNOWN	BRECCIA
EJA371		USGS		Geochemistry of rock samples from the National Geochemical Database: U.S. Geological Survey, Reston, VA.	U.S. Geological Survey	USGS		33.1111	-109.231	0.01	11	11	11	ES	SEDIMENTARY	UNKNOWN	UNKNOWN	BRECCIA																						0.7	500	5	5	30
EKG093		USGS		Geochemistry of rock samples from the National Geochemical Database: U.S. Geological Survey, Reston, VA.	U.S. Geological Survey	USGS		46.4278	-112.287	0.01				AAS	SEDIMENTARY	UNKNOWN	UNKNOWN	BRECCIA																										30	0.75	75		6.6
EKG093		USGS		Geochemistry of rock samples from the National Geochemical Database: U.S. Geological Survey, Reston, VA.	U.S. Geological Survey	USGS		46.4278	-112.287	0.01				ES	SEDIMENTARY	UNKNOWN	UNKNOWN	BRECCIA																						15	150			50				10
EKG607		USGS		Geochemistry of rock samples from the National Geochemical Database: U.S. Geological Survey, Reston, VA.	U.S. Geological Survey	USGS		46.3139	-112.54	0.01				AAS	SEDIMENTARY	UNKNOWN	UNKNOWN	BRECCIA																										55	15
EKG607		USGS		Geochemistry of rock samples from the National Geochemical Database: U.S. Geological Survey, Reston, VA.	U.S. Geological Survey	USGS		46.3139	-112.54	0.01				ES	SEDIMENTARY	UNKNOWN	UNKNOWN	BRECCIA																						20	1000		50	2000				300
EKS891		USGS		Geochemistry of rock samples from the National Geochemical Database: U.S. Geological Survey, Reston, VA.	U.S. Geological Survey	USGS		36.7244	-112.528	0.01	71	71	71	AAS	SEDIMENTARY	UNKNOWN	UNKNOWN	BRECCIA																										70		90
EKS891		USGS		Geochemistry of rock samples from the National Geochemical Database: U.S. Geological Survey, Reston, VA.	U.S. Geological Survey	USGS		36.7244	-112.528	0.01	71	71	71	ES	SEDIMENTARY	UNKNOWN	UNKNOWN	BRECCIA																						1	2000	70	30	100
EKS891		USGS		Geochemistry of rock samples from the National Geochemical Database: U.S. Geological Survey, Reston, VA.	U.S. Geological Survey	USGS		36.7244	-112.528	0.01	71	71	71	FLUOR	SEDIMENTARY	UNKNOWN	UNKNOWN	BRECCIA
ENC532		USGS		Geochemistry of rock samples from the National Geochemical Database: U.S. Geological Survey, Reston, VA.	U.S. Geological Survey	USGS		39.4406	-106.504	0.01	66	66	66	AAS	SEDIMENTARY	UNKNOWN	UNKNOWN	BRECCIA																												10
ENC532		USGS		Geochemistry of rock samples from the National Geochemical Database: U.S. Geological Survey, Reston, VA.	U.S. Geological Survey	USGS		39.4406	-106.504	0.01	66	66	66	ES	SEDIMENTARY	UNKNOWN	UNKNOWN	BRECCIA																						3	70	7		300
ENC658		USGS		Geochemistry of rock samples from the National Geochemical Database: U.S. Geological Survey, Reston, VA.	U.S. Geological Survey	USGS		39.4147	-106.505	0.01				AAS	SEDIMENTARY	UNKNOWN	UNKNOWN	BRECCIA																											0.2	10	30
ENC658		USGS		Geochemistry of rock samples from the National Geochemical Database: U.S. Geological Survey, Reston, VA.	U.S. Geological Survey	USGS		39.4147	-106.505	0.01				ES	SEDIMENTARY	UNKNOWN	UNKNOWN	BRECCIA																						1.5	150	15	10	15
ENQ183		USGS		Geochemistry of rock samples from the National Geochemical Database: U.S. Geological Survey, Reston, VA.	U.S. Geological Survey	USGS		36.5814	-112.805	0.01	71	71	71	AAS	SEDIMENTARY	UNKNOWN	UNKNOWN	BRECCIA																													450
ENQ183		USGS		Geochemistry of rock samples from the National Geochemical Database: U.S. Geological Survey, Reston, VA.	U.S. Geological Survey	USGS		36.5814	-112.805	0.01	71	71	71	ES	SEDIMENTARY	UNKNOWN	UNKNOWN	BRECCIA																						2	200	70	50	5000	30	700	700	15
ENQ183		USGS		Geochemistry of rock samples from the National Geochemical Database: U.S. Geological Survey, Reston, VA.	U.S. Geological Survey	USGS		36.5814	-112.805	0.01	71	71	71	ISE	SEDIMENTARY	UNKNOWN	UNKNOWN	BRECCIA
ENQ188		USGS		Geochemistry of rock samples from the National Geochemical Database: U.S. Geological Survey, Reston, VA.	U.S. Geological Survey	USGS		36.5814	-112.805	0.01	71	71	71	AAS	SEDIMENTARY	UNKNOWN	UNKNOWN	BRECCIA																													880
ENQ188		USGS		Geochemistry of rock samples from the National Geochemical Database: U.S. Geological Survey, Reston, VA.	U.S. Geological Survey	USGS		36.5814	-112.805	0.01	71	71	71	ES	SEDIMENTARY	UNKNOWN	UNKNOWN	BRECCIA																						2	200	70	50	5000	100	3000	1500	20
ENQ188		USGS		Geochemistry of rock samples from the National Geochemical Database: U.S. Geological Survey, Reston, VA.	U.S. Geological Survey	USGS		36.5814	-112.805	0.01	71	71	71	ISE	SEDIMENTARY	UNKNOWN	UNKNOWN	BRECCIA
EPC330		USGS		Geochemistry of rock samples from the National Geochemical Database: U.S. Geological Survey, Reston, VA.	U.S. Geological Survey	USGS		38.6922	-116.351	0.01	43	43	43	AAS	SEDIMENTARY	UNKNOWN	UNKNOWN	BRECCIA																											0.9	6	62
EPC330		USGS		Geochemistry of rock samples from the National Geochemical Database: U.S. Geological Survey, Reston, VA.	U.S. Geological Survey	USGS		38.6922	-116.351	0.01	43	43	43	ES	SEDIMENTARY	UNKNOWN	UNKNOWN	BRECCIA																						0.5	100			7
EPC333		USGS		Geochemistry of rock samples from the National Geochemical Database: U.S. Geological Survey, Reston, VA.	U.S. Geological Survey	USGS		38.6956	-116.349	0.01	43	43	43	AAS	SEDIMENTARY	UNKNOWN	UNKNOWN	BRECCIA																											0.3	27
EPC333		USGS		Geochemistry of rock samples from the National Geochemical Database: U.S. Geological Survey, Reston, VA.	U.S. Geological Survey	USGS		38.6956	-116.349	0.01	43	43	43	ES	SEDIMENTARY	UNKNOWN	UNKNOWN	BRECCIA																						0.15	70
EPC337		USGS		Geochemistry of rock samples from the National Geochemical Database: U.S. Geological Survey, Reston, VA.	U.S. Geological Survey	USGS		38.7017	-116.316	0.01	3	3	3	AAS	SEDIMENTARY	UNKNOWN	UNKNOWN	BRECCIA																											0.2	19	318
EPC337		USGS		Geochemistry of rock samples from the National Geochemical Database: U.S. Geological Survey, Reston, VA.	U.S. Geological Survey	USGS		38.7017	-116.316	0.01	3	3	3	ES	SEDIMENTARY	UNKNOWN	UNKNOWN	BRECCIA																						0.7	30	15		15
EPC338		USGS		Geochemistry of rock samples from the National Geochemical Database: U.S. Geological Survey, Reston, VA.	U.S. Geological Survey	USGS		38.7017	-116.316	0.01	3	3	3	AAS	SEDIMENTARY	UNKNOWN	UNKNOWN	BRECCIA																											0.3	21	374
EPC338		USGS		Geochemistry of rock samples from the National Geochemical Database: U.S. Geological Survey, Reston, VA.	U.S. Geological Survey	USGS		38.7017	-116.316	0.01	3	3	3	ES	SEDIMENTARY	UNKNOWN	UNKNOWN	BRECCIA																						0.7	70	7
EPC357		USGS		Geochemistry of rock samples from the National Geochemical Database: U.S. Geological Survey, Reston, VA.	U.S. Geological Survey	USGS		38.6817	-116.315	0.01	55	55	55	AAS	SEDIMENTARY	UNKNOWN	UNKNOWN	BRECCIA																											0.2	42	62
EPC357		USGS		Geochemistry of rock samples from the National Geochemical Database: U.S. Geological Survey, Reston, VA.	U.S. Geological Survey	USGS		38.6817	-116.315	0.01	55	55	55	ES	SEDIMENTARY	UNKNOWN	UNKNOWN	BRECCIA																						0.15	150	7
EPE897		USGS		Geochemistry of rock samples from the National Geochemical Database: U.S. Geological Survey, Reston, VA.	U.S. Geological Survey	USGS		39.8047	-106.956	0.01				AAS	SEDIMENTARY	UNKNOWN	UNKNOWN	BRECCIA																											0.5	78	18
EPE897		USGS		Geochemistry of rock samples from the National Geochemical Database: U.S. Geological Survey, Reston, VA.	U.S. Geological Survey	USGS		39.8047	-106.956	0.01				ES	SEDIMENTARY	UNKNOWN	UNKNOWN	BRECCIA																						1	1500	10	5	100				2
EPE898		USGS		Geochemistry of rock samples from the National Geochemical Database: U.S. Geological Survey, Reston, VA.	U.S. Geological Survey	USGS		39.8031	-106.955	0.01				AAS	SEDIMENTARY	UNKNOWN	UNKNOWN	BRECCIA																											0.4	38
EPE898		USGS		Geochemistry of rock samples from the National Geochemical Database: U.S. Geological Survey, Reston, VA.	U.S. Geological Survey	USGS		39.8031	-106.955	0.01				ES	SEDIMENTARY	UNKNOWN	UNKNOWN	BRECCIA																						2	1500	50	10	50
EPI679		USGS		Geochemistry of rock samples from the National Geochemical Database: U.S. Geological Survey, Reston, VA.	U.S. Geological Survey	USGS		42.2639	-107.263	0.01	50	50	50	AAS	SEDIMENTARY	UNKNOWN	UNKNOWN	BRECCIA																											0.4	95	300
EPI679		USGS		Geochemistry of rock samples from the National Geochemical Database: U.S. Geological Survey, Reston, VA.	U.S. Geological Survey	USGS		42.2639	-107.263	0.01	50	50	50	ES	SEDIMENTARY	UNKNOWN	UNKNOWN	BRECCIA																						10	500		100	5000			200	0.5
EPI680		USGS		Geochemistry of rock samples from the National Geochemical Database: U.S. Geological Survey, Reston, VA.	U.S. Geological Survey	USGS		42.2639	-107.263	0.01	50	50	50	AAS	SEDIMENTARY	UNKNOWN	UNKNOWN	BRECCIA																											0.5	80
EPI680		USGS		Geochemistry of rock samples from the National Geochemical Database: U.S. Geological Survey, Reston, VA.	U.S. Geological Survey	USGS		42.2639	-107.263	0.01	50	50	50	ES	SEDIMENTARY	UNKNOWN	UNKNOWN	BRECCIA																						10	500		200	20000			3000	1.5
EQM522		USGS		Geochemistry of rock samples from the National Geochemical Database: U.S. Geological Survey, Reston, VA.	U.S. Geological Survey	USGS		61.3006	-149.074	0.01				AAS	SEDIMENTARY	UNKNOWN	UNKNOWN	BRECCIA																												45
EQM522		USGS		Geochemistry of rock samples from the National Geochemical Database: U.S. Geological Survey, Reston, VA.	U.S. Geological Survey	USGS		61.3006	-149.074	0.01				ES	SEDIMENTARY	UNKNOWN	UNKNOWN	BRECCIA																						10	700	20	50	100
EQM523		USGS		Geochemistry of rock samples from the National Geochemical Database: U.S. Geological Survey, Reston, VA.	U.S. Geological Survey	USGS		61.3006	-149.074	0.01				AAS	SEDIMENTARY	UNKNOWN	UNKNOWN	BRECCIA																												35
EQM523		USGS		Geochemistry of rock samples from the National Geochemical Database: U.S. Geological Survey, Reston, VA.	U.S. Geological Survey	USGS		61.3006	-149.074	0.01				ES	SEDIMENTARY	UNKNOWN	UNKNOWN	BRECCIA																						10	1000	20	20	100
EQM524		USGS		Geochemistry of rock samples from the National Geochemical Database: U.S. Geological Survey, Reston, VA.	U.S. Geological Survey	USGS		61.3006	-149.074	0.01				AAS	SEDIMENTARY	UNKNOWN	UNKNOWN	BRECCIA																												35
EQM524		USGS		Geochemistry of rock samples from the National Geochemical Database: U.S. Geological Survey, Reston, VA.	U.S. Geological Survey	USGS		61.3006	-149.074	0.01				ES	SEDIMENTARY	UNKNOWN	UNKNOWN	BRECCIA																						7	1000	30	30	70
ERV823		USGS		Geochemistry of rock samples from the National Geochemical Database: U.S. Geological Survey, Reston, VA.	U.S. Geological Survey	USGS		39.5939	-118.312	0.01	11	11	11	AAS	SEDIMENTARY	UNKNOWN	UNKNOWN	BRECCIA																											0.1	10
ERV823		USGS		Geochemistry of rock samples from the National Geochemical Database: U.S. Geological Survey, Reston, VA.	U.S. Geological Survey	USGS		39.5939	-118.312	0.01	11	11	11	ES	SEDIMENTARY	UNKNOWN	UNKNOWN	BRECCIA																						0.07	100							7
ESD096		USGS		Geochemistry of rock samples from the National Geochemical Database: U.S. Geological Survey, Reston, VA.	U.S. Geological Survey	USGS		40.6403	-123.658	0.01	56	56	56	AAS	SEDIMENTARY	UNKNOWN	UNKNOWN	BRECCIA																												50
ESD096		USGS		Geochemistry of rock samples from the National Geochemical Database: U.S. Geological Survey, Reston, VA.	U.S. Geological Survey	USGS		40.6403	-123.658	0.01	56	56	56	ES	SEDIMENTARY	UNKNOWN	UNKNOWN	BRECCIA																						7	1500	100	50	70
ESH768		USGS		Geochemistry of rock samples from the National Geochemical Database: U.S. Geological Survey, Reston, VA.	U.S. Geological Survey	USGS		43.46	-114.37	0.01				AAS	SEDIMENTARY	UNKNOWN	UNKNOWN	BRECCIA
ESH768		USGS		Geochemistry of rock samples from the National Geochemical Database: U.S. Geological Survey, Reston, VA.	U.S. Geological Survey	USGS		43.46	-114.37	0.01				ICPAES	SEDIMENTARY	UNKNOWN	UNKNOWN	BRECCIA																										10	0.21	48	15	0.16
ESI467		USGS		Geochemistry of rock samples from the National Geochemical Database: U.S. Geological Survey, Reston, VA.	U.S. Geological Survey	USGS		40.5819	-122.542	0.01	44	44	44	AAS	SEDIMENTARY	UNKNOWN	UNKNOWN	BRECCIA																												10
ESI467		USGS		Geochemistry of rock samples from the National Geochemical Database: U.S. Geological Survey, Reston, VA.	U.S. Geological Survey	USGS		40.5819	-122.542	0.01	44	44	44	ES	SEDIMENTARY	UNKNOWN	UNKNOWN	BRECCIA																						2	700	15	15	50
ESI468		USGS		Geochemistry of rock samples from the National Geochemical Database: U.S. Geological Survey, Reston, VA.	U.S. Geological Survey	USGS		40.6014	-122.533	0.01	43	43	43	AAS	SEDIMENTARY	UNKNOWN	UNKNOWN	BRECCIA																												20
ESI468		USGS		Geochemistry of rock samples from the National Geochemical Database: U.S. Geological Survey, Reston, VA.	U.S. Geological Survey	USGS		40.6014	-122.533	0.01	43	43	43	ES	SEDIMENTARY	UNKNOWN	UNKNOWN	BRECCIA																						3	300		15	10
F000578		USGS		Geochemistry of rock samples from the National Geochemical Database: U.S. Geological Survey, Reston, VA.	U.S. Geological Survey	USGS		65.4211	-149.48	0.01				AAS	SEDIMENTARY	UNKNOWN	UNKNOWN	BRECCIA																										25	0.1	10	30
F000578		USGS		Geochemistry of rock samples from the National Geochemical Database: U.S. Geological Survey, Reston, VA.	U.S. Geological Survey	USGS		65.4211	-149.48	0.01				ES	SEDIMENTARY	UNKNOWN	UNKNOWN	BRECCIA																						0.7	150	30	10	20
F000578		USGS		Geochemistry of rock samples from the National Geochemical Database: U.S. Geological Survey, Reston, VA.	U.S. Geological Survey	USGS		65.4211	-149.48	0.01				XRF	SEDIMENTARY	UNKNOWN	UNKNOWN	BRECCIA		78.9	0.48	11.3							0.58	1.24	0.85	2.74	0.28									39		19
F000585		USGS		Geochemistry of rock samples from the National Geochemical Database: U.S. Geological Survey, Reston, VA.	U.S. Geological Survey	USGS		65.4519	-148.544	0.01				AAS	SEDIMENTARY	UNKNOWN	UNKNOWN	BRECCIA																											0.3	35	10
F000585		USGS		Geochemistry of rock samples from the National Geochemical Database: U.S. Geological Survey, Reston, VA.	U.S. Geological Survey	USGS		65.4519	-148.544	0.01				ES	SEDIMENTARY	UNKNOWN	UNKNOWN	BRECCIA																						10	20	10		1000				0.5
F000585		USGS		Geochemistry of rock samples from the National Geochemical Database: U.S. Geological Survey, Reston, VA.	U.S. Geological Survey	USGS		65.4519	-148.544	0.01				XRF	SEDIMENTARY	UNKNOWN	UNKNOWN	BRECCIA		54.5	0.57	13.2							1.45			3.38	0.56									18		1910
F001150		USGS		Geochemistry of rock samples from the National Geochemical Database: U.S. Geological Survey, Reston, VA.	U.S. Geological Survey	USGS		59.7856	-150.619	0.01				AAS	SEDIMENTARY	UNKNOWN	UNKNOWN	BRECCIA																											0.1	65
F001150		USGS		Geochemistry of rock samples from the National Geochemical Database: U.S. Geological Survey, Reston, VA.	U.S. Geological Survey	USGS		59.7856	-150.619	0.01				ES	SEDIMENTARY	UNKNOWN	UNKNOWN	BRECCIA																						2	1000	30	15	20
F001150		USGS		Geochemistry of rock samples from the National Geochemical Database: U.S. Geological Survey, Reston, VA.	U.S. Geological Survey	USGS		59.7856	-150.619	0.01				ICPAES	SEDIMENTARY	UNKNOWN	UNKNOWN	BRECCIA																										17	0.13	52	6.8	0.053
F003275		USGS		Geochemistry of rock samples from the National Geochemical Database: U.S. Geological Survey, Reston, VA.	U.S. Geological Survey	USGS		65.1292	-147.824	0.01				AAS	SEDIMENTARY	UNKNOWN	UNKNOWN	BRECCIA																											0.2	260	40
F003275		USGS		Geochemistry of rock samples from the National Geochemical Database: U.S. Geological Survey, Reston, VA.	U.S. Geological Survey	USGS		65.1292	-147.824	0.01				ES	SEDIMENTARY	UNKNOWN	UNKNOWN	BRECCIA																						10	150	50		50		200
F003287		USGS		Geochemistry of rock samples from the National Geochemical Database: U.S. Geological Survey, Reston, VA.	U.S. Geological Survey	USGS		65.1292	-147.824	0.01				AAS	SEDIMENTARY	UNKNOWN	UNKNOWN	BRECCIA																											1.2	350	20
F003287		USGS		Geochemistry of rock samples from the National Geochemical Database: U.S. Geological Survey, Reston, VA.	U.S. Geological Survey	USGS		65.1292	-147.824	0.01				ES	SEDIMENTARY	UNKNOWN	UNKNOWN	BRECCIA																						10	2000	100	30	50		200		0.7
F003288		USGS		Geochemistry of rock samples from the National Geochemical Database: U.S. Geological Survey, Reston, VA.	U.S. Geological Survey	USGS		65.1292	-147.824	0.01				AAS	SEDIMENTARY	UNKNOWN	UNKNOWN	BRECCIA																											0.4	85	10
F003288		USGS		Geochemistry of rock samples from the National Geochemical Database: U.S. Geological Survey, Reston, VA.	U.S. Geological Survey	USGS		65.1292	-147.824	0.01				ES	SEDIMENTARY	UNKNOWN	UNKNOWN	BRECCIA																						5		10	30	50				3
F003289		USGS		Geochemistry of rock samples from the National Geochemical Database: U.S. Geological Survey, Reston, VA.	U.S. Geological Survey	USGS		65.1292	-147.824	0.01				AAS	SEDIMENTARY	UNKNOWN	UNKNOWN	BRECCIA																											0.1	50	10
F003289		USGS		Geochemistry of rock samples from the National Geochemical Database: U.S. Geological Survey, Reston, VA.	U.S. Geological Survey	USGS		65.1292	-147.824	0.01				ES	SEDIMENTARY	UNKNOWN	UNKNOWN	BRECCIA																						5	500	5		30
F003323		USGS		Geochemistry of rock samples from the National Geochemical Database: U.S. Geological Survey, Reston, VA.	U.S. Geological Survey	USGS		65.0492	-147.516	0.01				AAS	SEDIMENTARY	UNKNOWN	UNKNOWN	BRECCIA																												5	1000
F003323		USGS		Geochemistry of rock samples from the National Geochemical Database: U.S. Geological Survey, Reston, VA.	U.S. Geological Survey	USGS		65.0492	-147.516	0.01				ES	SEDIMENTARY	UNKNOWN	UNKNOWN	BRECCIA																						3	20			15			700
F003324		USGS		Geochemistry of rock samples from the National Geochemical Database: U.S. Geological Survey, Reston, VA.	U.S. Geological Survey	USGS		65.0492	-147.516	0.01				AAS	SEDIMENTARY	UNKNOWN	UNKNOWN	BRECCIA
F003324		USGS		Geochemistry of rock samples from the National Geochemical Database: U.S. Geological Survey, Reston, VA.	U.S. Geological Survey	USGS		65.0492	-147.516	0.01				ES	SEDIMENTARY	UNKNOWN	UNKNOWN	BRECCIA																						1.5	15						5000	7
F004049		USGS		Geochemistry of rock samples from the National Geochemical Database: U.S. Geological Survey, Reston, VA.	U.S. Geological Survey	USGS		65.1806	-147.975	0.01	72	72	72	AAS	SEDIMENTARY	UNKNOWN	UNKNOWN	BRECCIA																											0.2	50	20
F004049		USGS		Geochemistry of rock samples from the National Geochemical Database: U.S. Geological Survey, Reston, VA.	U.S. Geological Survey	USGS		65.1806	-147.975	0.01	72	72	72	ES	SEDIMENTARY	UNKNOWN	UNKNOWN	BRECCIA																						10	5000	50	30	7
F008287		USGS		Geochemistry of rock samples from the National Geochemical Database: U.S. Geological Survey, Reston, VA.	U.S. Geological Survey	USGS		54.8561	-163.384	0.01	7	5	3	AAS	SEDIMENTARY	UNKNOWN	UNKNOWN	BRECCIA																										15		45
F008287		USGS		Geochemistry of rock samples from the National Geochemical Database: U.S. Geological Survey, Reston, VA.	U.S. Geological Survey	USGS		54.8561	-163.384	0.01	7	5	3	ES	SEDIMENTARY	UNKNOWN	UNKNOWN	BRECCIA																						5	3000	7	30	50
F008293		USGS		Geochemistry of rock samples from the National Geochemical Database: U.S. Geological Survey, Reston, VA.	U.S. Geological Survey	USGS		54.8319	-163.361	0.01	7	5	3	AAS	SEDIMENTARY	UNKNOWN	UNKNOWN	BRECCIA																										20		60
F008293		USGS		Geochemistry of rock samples from the National Geochemical Database: U.S. Geological Survey, Reston, VA.	U.S. Geological Survey	USGS		54.8319	-163.361	0.01	7	5	3	ES	SEDIMENTARY	UNKNOWN	UNKNOWN	BRECCIA																						3	2000		10	50
F008294		USGS		Geochemistry of rock samples from the National Geochemical Database: U.S. Geological Survey, Reston, VA.	U.S. Geological Survey	USGS		54.8319	-163.361	0.01	7	5	3	AAS	SEDIMENTARY	UNKNOWN	UNKNOWN	BRECCIA																										45		90
F008294		USGS		Geochemistry of rock samples from the National Geochemical Database: U.S. Geological Survey, Reston, VA.	U.S. Geological Survey	USGS		54.8319	-163.361	0.01	7	5	3	ES	SEDIMENTARY	UNKNOWN	UNKNOWN	BRECCIA																						3	3000	50	70	100
F008295		USGS		Geochemistry of rock samples from the National Geochemical Database: U.S. Geological Survey, Reston, VA.	U.S. Geological Survey	USGS		54.8106	-163.347	0.01	7	5	3	AAS	SEDIMENTARY	UNKNOWN	UNKNOWN	BRECCIA																										80		70
F008295		USGS		Geochemistry of rock samples from the National Geochemical Database: U.S. Geological Survey, Reston, VA.	U.S. Geological Survey	USGS		54.8106	-163.347	0.01	7	5	3	ES	SEDIMENTARY	UNKNOWN	UNKNOWN	BRECCIA																						3	1500	10	30	100
F008315		USGS		Geochemistry of rock samples from the National Geochemical Database: U.S. Geological Survey, Reston, VA.	U.S. Geological Survey	USGS		54.9339	-163.109	0.01	7	5	3	AAS	SEDIMENTARY	UNKNOWN	UNKNOWN	BRECCIA																										50	0.1	55
F008315		USGS		Geochemistry of rock samples from the National Geochemical Database: U.S. Geological Survey, Reston, VA.	U.S. Geological Survey	USGS		54.9339	-163.109	0.01	7	5	3	ES	SEDIMENTARY	UNKNOWN	UNKNOWN	BRECCIA																						3	1000	7	50	50
F031619		USGS		Geochemistry of rock samples from the National Geochemical Database: U.S. Geological Survey, Reston, VA.	U.S. Geological Survey	USGS		64.1369	-141.198	0.01				AAS	SEDIMENTARY	UNKNOWN	UNKNOWN	BRECCIA
F031619		USGS		Geochemistry of rock samples from the National Geochemical Database: U.S. Geological Survey, Reston, VA.	U.S. Geological Survey	USGS		64.1369	-141.198	0.01				MISC	SEDIMENTARY	UNKNOWN	UNKNOWN	BRECCIA																	2.33
F031619		USGS		Geochemistry of rock samples from the National Geochemical Database: U.S. Geological Survey, Reston, VA.	U.S. Geological Survey	USGS		64.1369	-141.198	0.01				XRF	SEDIMENTARY	UNKNOWN	UNKNOWN	BRECCIA		60.5	0.64	14.5						0.13	1.06	4.56	2.19	6.81	0.24
F031620		USGS		Geochemistry of rock samples from the National Geochemical Database: U.S. Geological Survey, Reston, VA.	U.S. Geological Survey	USGS		64.1411	-141.198	0.01				AAS	SEDIMENTARY	UNKNOWN	UNKNOWN	BRECCIA
F031620		USGS		Geochemistry of rock samples from the National Geochemical Database: U.S. Geological Survey, Reston, VA.	U.S. Geological Survey	USGS		64.1411	-141.198	0.01				MISC	SEDIMENTARY	UNKNOWN	UNKNOWN	BRECCIA																	5.3
F031620		USGS		Geochemistry of rock samples from the National Geochemical Database: U.S. Geological Survey, Reston, VA.	U.S. Geological Survey	USGS		64.1411	-141.198	0.01				XRF	SEDIMENTARY	UNKNOWN	UNKNOWN	BRECCIA		58.5	0.43	16.3						0.16	1.37	7.13	4.03	1.81	0.26
F031630		USGS		Geochemistry of rock samples from the National Geochemical Database: U.S. Geological Survey, Reston, VA.	U.S. Geological Survey	USGS		64.155	-141.353	0.01				AAS	SEDIMENTARY	UNKNOWN	UNKNOWN	BRECCIA
F031630		USGS		Geochemistry of rock samples from the National Geochemical Database: U.S. Geological Survey, Reston, VA.	U.S. Geological Survey	USGS		64.155	-141.353	0.01				MISC	SEDIMENTARY	UNKNOWN	UNKNOWN	BRECCIA																	11.7
F031630		USGS		Geochemistry of rock samples from the National Geochemical Database: U.S. Geological Survey, Reston, VA.	U.S. Geological Survey	USGS		64.155	-141.353	0.01				XRF	SEDIMENTARY	UNKNOWN	UNKNOWN	BRECCIA		54.6	0.02	10.8						0.1	0.23	14.9	3.72	3.05	0.07
F031631		USGS		Geochemistry of rock samples from the National Geochemical Database: U.S. Geological Survey, Reston, VA.	U.S. Geological Survey	USGS		64.155	-141.353	0.01				AAS	SEDIMENTARY	UNKNOWN	UNKNOWN	BRECCIA
F031631		USGS		Geochemistry of rock samples from the National Geochemical Database: U.S. Geological Survey, Reston, VA.	U.S. Geological Survey	USGS		64.155	-141.353	0.01				MISC	SEDIMENTARY	UNKNOWN	UNKNOWN	BRECCIA																	5.77
F031631		USGS		Geochemistry of rock samples from the National Geochemical Database: U.S. Geological Survey, Reston, VA.	U.S. Geological Survey	USGS		64.155	-141.353	0.01				XRF	SEDIMENTARY	UNKNOWN	UNKNOWN	BRECCIA		69.5	0.28	13.2						0.14	1.11	1.35	2.58	1.61	0.13
F031632		USGS		Geochemistry of rock samples from the National Geochemical Database: U.S. Geological Survey, Reston, VA.	U.S. Geological Survey	USGS		64.155	-141.353	0.01				AAS	SEDIMENTARY	UNKNOWN	UNKNOWN	BRECCIA
F031632		USGS		Geochemistry of rock samples from the National Geochemical Database: U.S. Geological Survey, Reston, VA.	U.S. Geological Survey	USGS		64.155	-141.353	0.01				MISC	SEDIMENTARY	UNKNOWN	UNKNOWN	BRECCIA																	5.32
F031632		USGS		Geochemistry of rock samples from the National Geochemical Database: U.S. Geological Survey, Reston, VA.	U.S. Geological Survey	USGS		64.155	-141.353	0.01				XRF	SEDIMENTARY	UNKNOWN	UNKNOWN	BRECCIA		70.8	0.36	12.8						0.13	1.03	1.32	2.62	1.56	0.14
JAA013		USGS		Geochemistry of rock samples from the National Geochemical Database: U.S. Geological Survey, Reston, VA.	U.S. Geological Survey	USGS		38.7325	-107.833	0.01	56	56	56	AAS	SEDIMENTARY	UNKNOWN	UNKNOWN	BRECCIA																										20
JAA013		USGS		Geochemistry of rock samples from the National Geochemical Database: U.S. Geological Survey, Reston, VA.	U.S. Geological Survey	USGS		38.7325	-107.833	0.01	56	56	56	ES	SEDIMENTARY	UNKNOWN	UNKNOWN	BRECCIA																						5	1500	15	15	70
JAA014		USGS		Geochemistry of rock samples from the National Geochemical Database: U.S. Geological Survey, Reston, VA.	U.S. Geological Survey	USGS		38.7325	-107.833	0.01	56	56	56	AAS	SEDIMENTARY	UNKNOWN	UNKNOWN	BRECCIA																										60				0.5
JAA014		USGS		Geochemistry of rock samples from the National Geochemical Database: U.S. Geological Survey, Reston, VA.	U.S. Geological Survey	USGS		38.7325	-107.833	0.01	56	56	56	ES	SEDIMENTARY	UNKNOWN	UNKNOWN	BRECCIA																						7	2000	30	15	150			500
JAA015		USGS		Geochemistry of rock samples from the National Geochemical Database: U.S. Geological Survey, Reston, VA.	U.S. Geological Survey	USGS		38.7325	-107.833	0.01	56	56	56	AAS	SEDIMENTARY	UNKNOWN	UNKNOWN	BRECCIA																										30
JAA015		USGS		Geochemistry of rock samples from the National Geochemical Database: U.S. Geological Survey, Reston, VA.	U.S. Geological Survey	USGS		38.7325	-107.833	0.01	56	56	56	ES	SEDIMENTARY	UNKNOWN	UNKNOWN	BRECCIA																						2	1000	10	10	50
JAA016		USGS		Geochemistry of rock samples from the National Geochemical Database: U.S. Geological Survey, Reston, VA.	U.S. Geological Survey	USGS		38.7325	-107.833	0.01	56	56	56	AAS	SEDIMENTARY	UNKNOWN	UNKNOWN	BRECCIA																										40				0.5
JAA016		USGS		Geochemistry of rock samples from the National Geochemical Database: U.S. Geological Survey, Reston, VA.	U.S. Geological Survey	USGS		38.7325	-107.833	0.01	56	56	56	ES	SEDIMENTARY	UNKNOWN	UNKNOWN	BRECCIA																						3	1500	10	10	150
JAA037		USGS		Geochemistry of rock samples from the National Geochemical Database: U.S. Geological Survey, Reston, VA.	U.S. Geological Survey	USGS		38.7856	-107.937	0.01	6	6	6	AAS	SEDIMENTARY	UNKNOWN	UNKNOWN	BRECCIA																										35
JAA037		USGS		Geochemistry of rock samples from the National Geochemical Database: U.S. Geological Survey, Reston, VA.	U.S. Geological Survey	USGS		38.7856	-107.937	0.01	6	6	6	ES	SEDIMENTARY	UNKNOWN	UNKNOWN	BRECCIA																					7	0.7	3000	5		3
JAA682		USGS		Geochemistry of rock samples from the National Geochemical Database: U.S. Geological Survey, Reston, VA.	U.S. Geological Survey	USGS		38.7331	-107.833	0.01				ES	SEDIMENTARY	UNKNOWN	UNKNOWN	BRECCIA																						1.5	300		5	20
JAA684		USGS		Geochemistry of rock samples from the National Geochemical Database: U.S. Geological Survey, Reston, VA.	U.S. Geological Survey	USGS		38.7331	-107.833	0.01				ES	SEDIMENTARY	UNKNOWN	UNKNOWN	BRECCIA																						1.5	500			10
JAA685		USGS		Geochemistry of rock samples from the National Geochemical Database: U.S. Geological Survey, Reston, VA.	U.S. Geological Survey	USGS		38.7331	-107.833	0.01				ES	SEDIMENTARY	UNKNOWN	UNKNOWN	BRECCIA																						1	300			10
JAA686		USGS		Geochemistry of rock samples from the National Geochemical Database: U.S. Geological Survey, Reston, VA.	U.S. Geological Survey	USGS		38.7331	-107.833	0.01				ES	SEDIMENTARY	UNKNOWN	UNKNOWN	BRECCIA																						0.5	150			10
JAA687		USGS		Geochemistry of rock samples from the National Geochemical Database: U.S. Geological Survey, Reston, VA.	U.S. Geological Survey	USGS		38.7331	-107.833	0.01				ES	SEDIMENTARY	UNKNOWN	UNKNOWN	BRECCIA																						1.5	300			10
JAA689		USGS		Geochemistry of rock samples from the National Geochemical Database: U.S. Geological Survey, Reston, VA.	U.S. Geological Survey	USGS		38.7331	-107.833	0.01				ES	SEDIMENTARY	UNKNOWN	UNKNOWN	BRECCIA																						0.5	150			5
JAA694		USGS		Geochemistry of rock samples from the National Geochemical Database: U.S. Geological Survey, Reston, VA.	U.S. Geological Survey	USGS		38.7331	-107.833	0.01				ES	SEDIMENTARY	UNKNOWN	UNKNOWN	BRECCIA																						0.7	150			5
JAA695		USGS		Geochemistry of rock samples from the National Geochemical Database: U.S. Geological Survey, Reston, VA.	U.S. Geological Survey	USGS		38.7331	-107.833	0.01				ES	SEDIMENTARY	UNKNOWN	UNKNOWN	BRECCIA																						1	300			20
LAR363		USGS		Geochemistry of rock samples from the National Geochemical Database: U.S. Geological Survey, Reston, VA.	U.S. Geological Survey	USGS		43.8075	-110.097	0.01	18	18	18	AAS	SEDIMENTARY	UNKNOWN	UNKNOWN	BRECCIA
LAR363		USGS		Geochemistry of rock samples from the National Geochemical Database: U.S. Geological Survey, Reston, VA.	U.S. Geological Survey	USGS		43.8075	-110.097	0.01	18	18	18	ES	SEDIMENTARY	UNKNOWN	UNKNOWN	BRECCIA																						3	150	70	15	15				2
LAR365		USGS		Geochemistry of rock samples from the National Geochemical Database: U.S. Geological Survey, Reston, VA.	U.S. Geological Survey	USGS		43.8078	-110.101	0.01	18	18	18	ES	SEDIMENTARY	UNKNOWN	UNKNOWN	BRECCIA																						3	200	30	15	7
LAR370		USGS		Geochemistry of rock samples from the National Geochemical Database: U.S. Geological Survey, Reston, VA.	U.S. Geological Survey	USGS		43.7686	-110.075	0.01	18	18	18	AAS	SEDIMENTARY	UNKNOWN	UNKNOWN	BRECCIA
LAR370		USGS		Geochemistry of rock samples from the National Geochemical Database: U.S. Geological Survey, Reston, VA.	U.S. Geological Survey	USGS		43.7686	-110.075	0.01	18	18	18	ES	SEDIMENTARY	UNKNOWN	UNKNOWN	BRECCIA																						5	1000	50	20	20
LAR373		USGS		Geochemistry of rock samples from the National Geochemical Database: U.S. Geological Survey, Reston, VA.	U.S. Geological Survey	USGS		44.0433	-110.048	0.01	18	18	18	ES	SEDIMENTARY	UNKNOWN	UNKNOWN	BRECCIA																						3	150	10		50
LAR374		USGS		Geochemistry of rock samples from the National Geochemical Database: U.S. Geological Survey, Reston, VA.	U.S. Geological Survey	USGS		44.0436	-110.048	0.01	18	18	18	AAS	SEDIMENTARY	UNKNOWN	UNKNOWN	BRECCIA
LAR374		USGS		Geochemistry of rock samples from the National Geochemical Database: U.S. Geological Survey, Reston, VA.	U.S. Geological Survey	USGS		44.0436	-110.048	0.01	18	18	18	ES	SEDIMENTARY	UNKNOWN	UNKNOWN	BRECCIA																						3	200	50	10	10
LAR408		USGS		Geochemistry of rock samples from the National Geochemical Database: U.S. Geological Survey, Reston, VA.	U.S. Geological Survey	USGS		43.8828	-110.031	0.01	18	18	18	AAS	SEDIMENTARY	UNKNOWN	UNKNOWN	BRECCIA
LAR408		USGS		Geochemistry of rock samples from the National Geochemical Database: U.S. Geological Survey, Reston, VA.	U.S. Geological Survey	USGS		43.8828	-110.031	0.01	18	18	18	ES	SEDIMENTARY	UNKNOWN	UNKNOWN	BRECCIA																						3	150	70	15	10
LAR410		USGS		Geochemistry of rock samples from the National Geochemical Database: U.S. Geological Survey, Reston, VA.	U.S. Geological Survey	USGS		43.9383	-110.09	0.01	18	18	18	ES	SEDIMENTARY	UNKNOWN	UNKNOWN	BRECCIA																						3	700	150	15	70
LAR524		USGS		Geochemistry of rock samples from the National Geochemical Database: U.S. Geological Survey, Reston, VA.	U.S. Geological Survey	USGS		43.8969	-110.059	0.01	18	18	18	AAS	SEDIMENTARY	UNKNOWN	UNKNOWN	BRECCIA
LAR524		USGS		Geochemistry of rock samples from the National Geochemical Database: U.S. Geological Survey, Reston, VA.	U.S. Geological Survey	USGS		43.8969	-110.059	0.01	18	18	18	ES	SEDIMENTARY	UNKNOWN	UNKNOWN	BRECCIA																						3	500	70		50
LAR627		USGS		Geochemistry of rock samples from the National Geochemical Database: U.S. Geological Survey, Reston, VA.	U.S. Geological Survey	USGS		43.9972	-110.151	0.01	18	18	18	AAS	SEDIMENTARY	UNKNOWN	UNKNOWN	BRECCIA
LAR627		USGS		Geochemistry of rock samples from the National Geochemical Database: U.S. Geological Survey, Reston, VA.	U.S. Geological Survey	USGS		43.9972	-110.151	0.01	18	18	18	ES	SEDIMENTARY	UNKNOWN	UNKNOWN	BRECCIA																						5	1000	100	30	50
LAR630		USGS		Geochemistry of rock samples from the National Geochemical Database: U.S. Geological Survey, Reston, VA.	U.S. Geological Survey	USGS		43.9975	-110.147	0.01	18	18	18	ES	SEDIMENTARY	UNKNOWN	UNKNOWN	BRECCIA																						3	1000	50	15	20
LAR633		USGS		Geochemistry of rock samples from the National Geochemical Database: U.S. Geological Survey, Reston, VA.	U.S. Geological Survey	USGS		43.9458	-110.176	0.01	18	18	18	ES	SEDIMENTARY	UNKNOWN	UNKNOWN	BRECCIA																						5	1500	70	15	10
LAR656		USGS		Geochemistry of rock samples from the National Geochemical Database: U.S. Geological Survey, Reston, VA.	U.S. Geological Survey	USGS		43.8544	-110.008	0.01	18	18	18	ES	SEDIMENTARY	UNKNOWN	UNKNOWN	BRECCIA																						3	150	20	5	50
LAS063		USGS		Geochemistry of rock samples from the National Geochemical Database: U.S. Geological Survey, Reston, VA.	U.S. Geological Survey	USGS		44.0831	-110.505	0.01	18	18	18	ES	SEDIMENTARY	UNKNOWN	UNKNOWN	BRECCIA																						15	1500	50	70	150
LAS067		USGS		Geochemistry of rock samples from the National Geochemical Database: U.S. Geological Survey, Reston, VA.	U.S. Geological Survey	USGS		44.0836	-110.511	0.01	18	18	18	ES	SEDIMENTARY	UNKNOWN	UNKNOWN	BRECCIA																						3	1000	100	7	20
LAS071		USGS		Geochemistry of rock samples from the National Geochemical Database: U.S. Geological Survey, Reston, VA.	U.S. Geological Survey	USGS		44.0883	-110.511	0.01	18	18	18	ES	SEDIMENTARY	UNKNOWN	UNKNOWN	BRECCIA																						5	2000	70	30	50
LAS072		USGS		Geochemistry of rock samples from the National Geochemical Database: U.S. Geological Survey, Reston, VA.	U.S. Geological Survey	USGS		44.0956	-110.519	0.01	18	18	18	ES	SEDIMENTARY	UNKNOWN	UNKNOWN	BRECCIA																						7	1500	70	50	70
LAS073		USGS		Geochemistry of rock samples from the National Geochemical Database: U.S. Geological Survey, Reston, VA.	U.S. Geological Survey	USGS		44.0953	-110.519	0.01	18	18	18	ES	SEDIMENTARY	UNKNOWN	UNKNOWN	BRECCIA																						7	1500	70	50	50
LAS102		USGS		Geochemistry of rock samples from the National Geochemical Database: U.S. Geological Survey, Reston, VA.	U.S. Geological Survey	USGS		44.0464	-110.422	0.01	55	55	55	AAS	SEDIMENTARY	UNKNOWN	UNKNOWN	BRECCIA
LAS102		USGS		Geochemistry of rock samples from the National Geochemical Database: U.S. Geological Survey, Reston, VA.	U.S. Geological Survey	USGS		44.0464	-110.422	0.01	55	55	55	ES	SEDIMENTARY	UNKNOWN	UNKNOWN	BRECCIA																						2	1000	7		10
LAS104		USGS		Geochemistry of rock samples from the National Geochemical Database: U.S. Geological Survey, Reston, VA.	U.S. Geological Survey	USGS		44.0464	-110.422	0.01	18	18	18	AAS	SEDIMENTARY	UNKNOWN	UNKNOWN	BRECCIA
LAS104		USGS		Geochemistry of rock samples from the National Geochemical Database: U.S. Geological Survey, Reston, VA.	U.S. Geological Survey	USGS		44.0464	-110.422	0.01	18	18	18	ES	SEDIMENTARY	UNKNOWN	UNKNOWN	BRECCIA																						5	1500	100	50	50
LAS120		USGS		Geochemistry of rock samples from the National Geochemical Database: U.S. Geological Survey, Reston, VA.	U.S. Geological Survey	USGS		44.0561	-110.469	0.01	18	18	18	AAS	SEDIMENTARY	UNKNOWN	UNKNOWN	BRECCIA
LAS120		USGS		Geochemistry of rock samples from the National Geochemical Database: U.S. Geological Survey, Reston, VA.	U.S. Geological Survey	USGS		44.0561	-110.469	0.01	18	18	18	ES	SEDIMENTARY	UNKNOWN	UNKNOWN	BRECCIA																						2	1000	5		5
LAS122		USGS		Geochemistry of rock samples from the National Geochemical Database: U.S. Geological Survey, Reston, VA.	U.S. Geological Survey	USGS		44.1269	-110.476	0.01	18	18	18	ES	SEDIMENTARY	UNKNOWN	UNKNOWN	BRECCIA																						1	2000	5		5
LAS308		USGS		Geochemistry of rock samples from the National Geochemical Database: U.S. Geological Survey, Reston, VA.	U.S. Geological Survey	USGS		43.7928	-109.973	0.01	18	18	18	ES	SEDIMENTARY	UNKNOWN	UNKNOWN	BRECCIA																						7	1500	150	50	70
LAS309		USGS		Geochemistry of rock samples from the National Geochemical Database: U.S. Geological Survey, Reston, VA.	U.S. Geological Survey	USGS		43.8	-109.505	0.01	18	18	18	ES	SEDIMENTARY	UNKNOWN	UNKNOWN	BRECCIA																						5	1500	150	50	50
LAS311		USGS		Geochemistry of rock samples from the National Geochemical Database: U.S. Geological Survey, Reston, VA.	U.S. Geological Survey	USGS		43.4928	-109.918	0.01	18	18	18	AAS	SEDIMENTARY	UNKNOWN	UNKNOWN	BRECCIA
LAS311		USGS		Geochemistry of rock samples from the National Geochemical Database: U.S. Geological Survey, Reston, VA.	U.S. Geological Survey	USGS		43.4928	-109.918	0.01	18	18	18	ES	SEDIMENTARY	UNKNOWN	UNKNOWN	BRECCIA																						7	200	50	15	70
LAS331		USGS		Geochemistry of rock samples from the National Geochemical Database: U.S. Geological Survey, Reston, VA.	U.S. Geological Survey	USGS		43.7961	-109.95	0.01	18	18	18	ES	SEDIMENTARY	UNKNOWN	UNKNOWN	BRECCIA																						5	1000	20	30	50
LAS332		USGS		Geochemistry of rock samples from the National Geochemical Database: U.S. Geological Survey, Reston, VA.	U.S. Geological Survey	USGS		43.7967	-109.949	0.01	18	18	18	ES	SEDIMENTARY	UNKNOWN	UNKNOWN	BRECCIA																						5	300	150	30	15
LAS333		USGS		Geochemistry of rock samples from the National Geochemical Database: U.S. Geological Survey, Reston, VA.	U.S. Geological Survey	USGS		43.7919	-109.948	0.01	18	18	18	ES	SEDIMENTARY	UNKNOWN	UNKNOWN	BRECCIA																						5	1000	150	50	20
LAS334		USGS		Geochemistry of rock samples from the National Geochemical Database: U.S. Geological Survey, Reston, VA.	U.S. Geological Survey	USGS		43.7903	-109.946	0.01	18	18	18	ES	SEDIMENTARY	UNKNOWN	UNKNOWN	BRECCIA																						5	1000	100	50	20
LAS347		USGS		Geochemistry of rock samples from the National Geochemical Database: U.S. Geological Survey, Reston, VA.	U.S. Geological Survey	USGS		43.7908	-109.981	0.01	18	18	18	ES	SEDIMENTARY	UNKNOWN	UNKNOWN	BRECCIA																						7	1500	100	30	30
LAS353		USGS		Geochemistry of rock samples from the National Geochemical Database: U.S. Geological Survey, Reston, VA.	U.S. Geological Survey	USGS		43.815	-109.819	0.01	18	18	18	ES	SEDIMENTARY	UNKNOWN	UNKNOWN	BRECCIA																						3	700	100	15	15
LAS367		USGS		Geochemistry of rock samples from the National Geochemical Database: U.S. Geological Survey, Reston, VA.	U.S. Geological Survey	USGS		43.7625	-109.765	0.01	18	18	18	ES	SEDIMENTARY	UNKNOWN	UNKNOWN	BRECCIA																						3	700	50	15	10
LAS373		USGS		Geochemistry of rock samples from the National Geochemical Database: U.S. Geological Survey, Reston, VA.	U.S. Geological Survey	USGS		43.7614	-109.877	0.01	18	18	18	AAS	SEDIMENTARY	UNKNOWN	UNKNOWN	BRECCIA
LAS373		USGS		Geochemistry of rock samples from the National Geochemical Database: U.S. Geological Survey, Reston, VA.	U.S. Geological Survey	USGS		43.7614	-109.877	0.01	18	18	18	ES	SEDIMENTARY	UNKNOWN	UNKNOWN	BRECCIA																						10	2000	10	15	20
LAS383		USGS		Geochemistry of rock samples from the National Geochemical Database: U.S. Geological Survey, Reston, VA.	U.S. Geological Survey	USGS		43.7681	-109.864	0.01	55	55	55	AAS	SEDIMENTARY	UNKNOWN	UNKNOWN	BRECCIA
LAS383		USGS		Geochemistry of rock samples from the National Geochemical Database: U.S. Geological Survey, Reston, VA.	U.S. Geological Survey	USGS		43.7681	-109.864	0.01	55	55	55	ES	SEDIMENTARY	UNKNOWN	UNKNOWN	BRECCIA																						3	500	20	20	15
LAS394		USGS		Geochemistry of rock samples from the National Geochemical Database: U.S. Geological Survey, Reston, VA.	U.S. Geological Survey	USGS		43.9631	-110.001	0.01	18	18	18	ES	SEDIMENTARY	UNKNOWN	UNKNOWN	BRECCIA																						3	500	150	15	10
LAT183		USGS		Geochemistry of rock samples from the National Geochemical Database: U.S. Geological Survey, Reston, VA.	U.S. Geological Survey	USGS		43.8203	-110.134	0.01				ES	SEDIMENTARY	UNKNOWN	UNKNOWN	BRECCIA																						3	50			15
LBA983		USGS		Geochemistry of rock samples from the National Geochemical Database: U.S. Geological Survey, Reston, VA.	U.S. Geological Survey	USGS		47.6436	-121.585	0.01				ES	SEDIMENTARY	UNKNOWN	UNKNOWN	BRECCIA																						5	300	5		150				0.7
LBX029		USGS		Geochemistry of rock samples from the National Geochemical Database: U.S. Geological Survey, Reston, VA.	U.S. Geological Survey	USGS		39.0564	-106.882	0.01				AAS	SEDIMENTARY	UNKNOWN	UNKNOWN	BRECCIA																										20		5
LBX029		USGS		Geochemistry of rock samples from the National Geochemical Database: U.S. Geological Survey, Reston, VA.	U.S. Geological Survey	USGS		39.0564	-106.882	0.01				ES	SEDIMENTARY	UNKNOWN	UNKNOWN	BRECCIA																						10	100			30
LBX029		USGS		Geochemistry of rock samples from the National Geochemical Database: U.S. Geological Survey, Reston, VA.	U.S. Geological Survey	USGS		39.0564	-106.882	0.01				ISE	SEDIMENTARY	UNKNOWN	UNKNOWN	BRECCIA
LBZ019		USGS		Geochemistry of rock samples from the National Geochemical Database: U.S. Geological Survey, Reston, VA.	U.S. Geological Survey	USGS		39.0569	-106.874	0.01				AAS	SEDIMENTARY	UNKNOWN	UNKNOWN	BRECCIA
LBZ019		USGS		Geochemistry of rock samples from the National Geochemical Database: U.S. Geological Survey, Reston, VA.	U.S. Geological Survey	USGS		39.0569	-106.874	0.01				ES	SEDIMENTARY	UNKNOWN	UNKNOWN	BRECCIA																						10	150	10		1000
LBZ032		USGS		Geochemistry of rock samples from the National Geochemical Database: U.S. Geological Survey, Reston, VA.	U.S. Geological Survey	USGS		39.0533	-106.887	0.01				AAS	SEDIMENTARY	UNKNOWN	UNKNOWN	BRECCIA
LBZ032		USGS		Geochemistry of rock samples from the National Geochemical Database: U.S. Geological Survey, Reston, VA.	U.S. Geological Survey	USGS		39.0533	-106.887	0.01				ES	SEDIMENTARY	UNKNOWN	UNKNOWN	BRECCIA																						10	100	5		30				50
LBZ034		USGS		Geochemistry of rock samples from the National Geochemical Database: U.S. Geological Survey, Reston, VA.	U.S. Geological Survey	USGS		39.0533	-106.887	0.01				AAS	SEDIMENTARY	UNKNOWN	UNKNOWN	BRECCIA
LBZ034		USGS		Geochemistry of rock samples from the National Geochemical Database: U.S. Geological Survey, Reston, VA.	U.S. Geological Survey	USGS		39.0533	-106.887	0.01				ES	SEDIMENTARY	UNKNOWN	UNKNOWN	BRECCIA																						15	70	7		150				700
LBZ037		USGS		Geochemistry of rock samples from the National Geochemical Database: U.S. Geological Survey, Reston, VA.	U.S. Geological Survey	USGS		39.0553	-106.888	0.01				AAS	SEDIMENTARY	UNKNOWN	UNKNOWN	BRECCIA
LBZ037		USGS		Geochemistry of rock samples from the National Geochemical Database: U.S. Geological Survey, Reston, VA.	U.S. Geological Survey	USGS		39.0553	-106.888	0.01				COL	SEDIMENTARY	UNKNOWN	UNKNOWN	BRECCIA
LBZ037		USGS		Geochemistry of rock samples from the National Geochemical Database: U.S. Geological Survey, Reston, VA.	U.S. Geological Survey	USGS		39.0553	-106.888	0.01				ES	SEDIMENTARY	UNKNOWN	UNKNOWN	BRECCIA																						20	100	5	5	20				0.7
LBZ039		USGS		Geochemistry of rock samples from the National Geochemical Database: U.S. Geological Survey, Reston, VA.	U.S. Geological Survey	USGS		39.0561	-106.889	0.01				AAS	SEDIMENTARY	UNKNOWN	UNKNOWN	BRECCIA
LBZ039		USGS		Geochemistry of rock samples from the National Geochemical Database: U.S. Geological Survey, Reston, VA.	U.S. Geological Survey	USGS		39.0561	-106.889	0.01				ES	SEDIMENTARY	UNKNOWN	UNKNOWN	BRECCIA																						15				30
LBZ077		USGS		Geochemistry of rock samples from the National Geochemical Database: U.S. Geological Survey, Reston, VA.	U.S. Geological Survey	USGS		39.0553	-106.877	0.01				AAS	SEDIMENTARY	UNKNOWN	UNKNOWN	BRECCIA
LBZ077		USGS		Geochemistry of rock samples from the National Geochemical Database: U.S. Geological Survey, Reston, VA.	U.S. Geological Survey	USGS		39.0553	-106.877	0.01				COL	SEDIMENTARY	UNKNOWN	UNKNOWN	BRECCIA
LBZ077		USGS		Geochemistry of rock samples from the National Geochemical Database: U.S. Geological Survey, Reston, VA.	U.S. Geological Survey	USGS		39.0553	-106.877	0.01				ES	SEDIMENTARY	UNKNOWN	UNKNOWN	BRECCIA																						5	100			200				2
LBZ085		USGS		Geochemistry of rock samples from the National Geochemical Database: U.S. Geological Survey, Reston, VA.	U.S. Geological Survey	USGS		39.0561	-106.878	0.01				AAS	SEDIMENTARY	UNKNOWN	UNKNOWN	BRECCIA
LBZ085		USGS		Geochemistry of rock samples from the National Geochemical Database: U.S. Geological Survey, Reston, VA.	U.S. Geological Survey	USGS		39.0561	-106.878	0.01				ES	SEDIMENTARY	UNKNOWN	UNKNOWN	BRECCIA																						5	200			100
LBZ111		USGS		Geochemistry of rock samples from the National Geochemical Database: U.S. Geological Survey, Reston, VA.	U.S. Geological Survey	USGS		39.0603	-106.877	0.01				AAS	SEDIMENTARY	UNKNOWN	UNKNOWN	BRECCIA
LBZ111		USGS		Geochemistry of rock samples from the National Geochemical Database: U.S. Geological Survey, Reston, VA.	U.S. Geological Survey	USGS		39.0603	-106.877	0.01				ES	SEDIMENTARY	UNKNOWN	UNKNOWN	BRECCIA																						3	300			15				1
LBZ147		USGS		Geochemistry of rock samples from the National Geochemical Database: U.S. Geological Survey, Reston, VA.	U.S. Geological Survey	USGS		39.0508	-106.857	0.01				ES	SEDIMENTARY	UNKNOWN	UNKNOWN	BRECCIA																						10	300			500
LBZ154		USGS		Geochemistry of rock samples from the National Geochemical Database: U.S. Geological Survey, Reston, VA.	U.S. Geological Survey	USGS		39.0583	-106.859	0.01				ES	SEDIMENTARY	UNKNOWN	UNKNOWN	BRECCIA																						5	20			100
LBZ155		USGS		Geochemistry of rock samples from the National Geochemical Database: U.S. Geological Survey, Reston, VA.	U.S. Geological Survey	USGS		39.0583	-106.859	0.01				ES	SEDIMENTARY	UNKNOWN	UNKNOWN	BRECCIA																						7	100			70
LBZ173		USGS		Geochemistry of rock samples from the National Geochemical Database: U.S. Geological Survey, Reston, VA.	U.S. Geological Survey	USGS		39.0567	-106.897	0.01				COL	SEDIMENTARY	UNKNOWN	UNKNOWN	BRECCIA
LBZ173		USGS		Geochemistry of rock samples from the National Geochemical Database: U.S. Geological Survey, Reston, VA.	U.S. Geological Survey	USGS		39.0567	-106.897	0.01				ES	SEDIMENTARY	UNKNOWN	UNKNOWN	BRECCIA																						10	15	7	5	20
LBZ175		USGS		Geochemistry of rock samples from the National Geochemical Database: U.S. Geological Survey, Reston, VA.	U.S. Geological Survey	USGS		39.0561	-106.897	0.01				ES	SEDIMENTARY	UNKNOWN	UNKNOWN	BRECCIA																						15	30			50
LBZ179		USGS		Geochemistry of rock samples from the National Geochemical Database: U.S. Geological Survey, Reston, VA.	U.S. Geological Survey	USGS		39.0536	-106.889	0.01				COL	SEDIMENTARY	UNKNOWN	UNKNOWN	BRECCIA
LBZ179		USGS		Geochemistry of rock samples from the National Geochemical Database: U.S. Geological Survey, Reston, VA.	U.S. Geological Survey	USGS		39.0536	-106.889	0.01				ES	SEDIMENTARY	UNKNOWN	UNKNOWN	BRECCIA																						5	200	20	5	150		200
LBZ187		USGS		Geochemistry of rock samples from the National Geochemical Database: U.S. Geological Survey, Reston, VA.	U.S. Geological Survey	USGS		39.0381	-106.862	0.01				COL	SEDIMENTARY	UNKNOWN	UNKNOWN	BRECCIA
LBZ187		USGS		Geochemistry of rock samples from the National Geochemical Database: U.S. Geological Survey, Reston, VA.	U.S. Geological Survey	USGS		39.0381	-106.862	0.01				ES	SEDIMENTARY	UNKNOWN	UNKNOWN	BRECCIA																						7
LBZ229		USGS		Geochemistry of rock samples from the National Geochemical Database: U.S. Geological Survey, Reston, VA.	U.S. Geological Survey	USGS		39.0583	-106.852	0.01				AAS	SEDIMENTARY	UNKNOWN	UNKNOWN	BRECCIA
LBZ229		USGS		Geochemistry of rock samples from the National Geochemical Database: U.S. Geological Survey, Reston, VA.	U.S. Geological Survey	USGS		39.0583	-106.852	0.01				ES	SEDIMENTARY	UNKNOWN	UNKNOWN	BRECCIA																						10	500	15	10	50
LBZ230		USGS		Geochemistry of rock samples from the National Geochemical Database: U.S. Geological Survey, Reston, VA.	U.S. Geological Survey	USGS		39.0589	-106.852	0.01				AAS	SEDIMENTARY	UNKNOWN	UNKNOWN	BRECCIA
LBZ230		USGS		Geochemistry of rock samples from the National Geochemical Database: U.S. Geological Survey, Reston, VA.	U.S. Geological Survey	USGS		39.0589	-106.852	0.01				ES	SEDIMENTARY	UNKNOWN	UNKNOWN	BRECCIA																						10	200			50				3
LBZ235		USGS		Geochemistry of rock samples from the National Geochemical Database: U.S. Geological Survey, Reston, VA.	U.S. Geological Survey	USGS		39.0656	-106.854	0.01				ES	SEDIMENTARY	UNKNOWN	UNKNOWN	BRECCIA																						3	100			150
LBZ238		USGS		Geochemistry of rock samples from the National Geochemical Database: U.S. Geological Survey, Reston, VA.	U.S. Geological Survey	USGS		39.0508	-106.892	0.01				ES	SEDIMENTARY	UNKNOWN	UNKNOWN	BRECCIA																						10	300	5		30
LBZ283		USGS		Geochemistry of rock samples from the National Geochemical Database: U.S. Geological Survey, Reston, VA.	U.S. Geological Survey	USGS		39.0097	-106.861	0.01				AAS	SEDIMENTARY	UNKNOWN	UNKNOWN	BRECCIA
LBZ283		USGS		Geochemistry of rock samples from the National Geochemical Database: U.S. Geological Survey, Reston, VA.	U.S. Geological Survey	USGS		39.0097	-106.861	0.01				ES	SEDIMENTARY	UNKNOWN	UNKNOWN	BRECCIA																						10	150	20		20
LBZ366		USGS		Geochemistry of rock samples from the National Geochemical Database: U.S. Geological Survey, Reston, VA.	U.S. Geological Survey	USGS		39.0683	-106.864	0.01				ES	SEDIMENTARY	UNKNOWN	UNKNOWN	BRECCIA																						20	70		5	200
LBZ390		USGS		Geochemistry of rock samples from the National Geochemical Database: U.S. Geological Survey, Reston, VA.	U.S. Geological Survey	USGS		39.0206	-107.031	0.01				AAS	SEDIMENTARY	UNKNOWN	UNKNOWN	BRECCIA																												120
LBZ390		USGS		Geochemistry of rock samples from the National Geochemical Database: U.S. Geological Survey, Reston, VA.	U.S. Geological Survey	USGS		39.0206	-107.031	0.01				ES	SEDIMENTARY	UNKNOWN	UNKNOWN	BRECCIA																						5	150	50	15	20		200		3
LBZ390		USGS		Geochemistry of rock samples from the National Geochemical Database: U.S. Geological Survey, Reston, VA.	U.S. Geological Survey	USGS		39.0206	-107.031	0.01				ISE	SEDIMENTARY	UNKNOWN	UNKNOWN	BRECCIA
LBZ609		USGS		Geochemistry of rock samples from the National Geochemical Database: U.S. Geological Survey, Reston, VA.	U.S. Geological Survey	USGS		39.0119	-106.933	0.01	70	70	70	ES	SEDIMENTARY	UNKNOWN	UNKNOWN	BRECCIA																						1.5	1500
LBZ609		USGS		Geochemistry of rock samples from the National Geochemical Database: U.S. Geological Survey, Reston, VA.	U.S. Geological Survey	USGS		39.0119	-106.933	0.01	70	70	70	AAS	SEDIMENTARY	UNKNOWN	UNKNOWN	BRECCIA																												30
LBZ609		USGS		Geochemistry of rock samples from the National Geochemical Database: U.S. Geological Survey, Reston, VA.	U.S. Geological Survey	USGS		39.0119	-106.933	0.01	70	70	70	ISE	SEDIMENTARY	UNKNOWN	UNKNOWN	BRECCIA
LCM329		USGS		Geochemistry of rock samples from the National Geochemical Database: U.S. Geological Survey, Reston, VA.	U.S. Geological Survey	USGS		45.6179	-116.494	0.01				ES	SEDIMENTARY	UNKNOWN	UNKNOWN	BRECCIA																						5	1000	10	10	30
LCP651		USGS		Geochemistry of rock samples from the National Geochemical Database: U.S. Geological Survey, Reston, VA.	U.S. Geological Survey	USGS		44.3272	-109.602	0.01	18	18	18	AAS	SEDIMENTARY	UNKNOWN	UNKNOWN	BRECCIA																										25		30
LCP651		USGS		Geochemistry of rock samples from the National Geochemical Database: U.S. Geological Survey, Reston, VA.	U.S. Geological Survey	USGS		44.3272	-109.602	0.01	18	18	18	ES	SEDIMENTARY	UNKNOWN	UNKNOWN	BRECCIA																						5	700	100	20	20
LCP661		USGS		Geochemistry of rock samples from the National Geochemical Database: U.S. Geological Survey, Reston, VA.	U.S. Geological Survey	USGS		44.2992	-109.611	0.01	18	18	18	AAS	SEDIMENTARY	UNKNOWN	UNKNOWN	BRECCIA																										10		15
LCP661		USGS		Geochemistry of rock samples from the National Geochemical Database: U.S. Geological Survey, Reston, VA.	U.S. Geological Survey	USGS		44.2992	-109.611	0.01	18	18	18	ES	SEDIMENTARY	UNKNOWN	UNKNOWN	BRECCIA																						5	1000	150	30	20
LCP662		USGS		Geochemistry of rock samples from the National Geochemical Database: U.S. Geological Survey, Reston, VA.	U.S. Geological Survey	USGS		44.2986	-109.609	0.01	18	18	18	AAS	SEDIMENTARY	UNKNOWN	UNKNOWN	BRECCIA																										20		20
LCP662		USGS		Geochemistry of rock samples from the National Geochemical Database: U.S. Geological Survey, Reston, VA.	U.S. Geological Survey	USGS		44.2986	-109.609	0.01	18	18	18	ES	SEDIMENTARY	UNKNOWN	UNKNOWN	BRECCIA																						2	500	70	15	10
LCP797		USGS		Geochemistry of rock samples from the National Geochemical Database: U.S. Geological Survey, Reston, VA.	U.S. Geological Survey	USGS		44.2908	-109.816	0.01	18	18	18	AAS	SEDIMENTARY	UNKNOWN	UNKNOWN	BRECCIA																										20		35
LCP797		USGS		Geochemistry of rock samples from the National Geochemical Database: U.S. Geological Survey, Reston, VA.	U.S. Geological Survey	USGS		44.2908	-109.816	0.01	18	18	18	ES	SEDIMENTARY	UNKNOWN	UNKNOWN	BRECCIA																						5	500	30	20	15
LCP799		USGS		Geochemistry of rock samples from the National Geochemical Database: U.S. Geological Survey, Reston, VA.	U.S. Geological Survey	USGS		44.2903	-109.823	0.01	18	18	18	AAS	SEDIMENTARY	UNKNOWN	UNKNOWN	BRECCIA																										30		35
LCP799		USGS		Geochemistry of rock samples from the National Geochemical Database: U.S. Geological Survey, Reston, VA.	U.S. Geological Survey	USGS		44.2903	-109.823	0.01	18	18	18	ES	SEDIMENTARY	UNKNOWN	UNKNOWN	BRECCIA																						3	700	30	15	20
LCP803		USGS		Geochemistry of rock samples from the National Geochemical Database: U.S. Geological Survey, Reston, VA.	U.S. Geological Survey	USGS		44.3403	-109.808	0.01	18	18	18	AAS	SEDIMENTARY	UNKNOWN	UNKNOWN	BRECCIA																										25		30
LCP803		USGS		Geochemistry of rock samples from the National Geochemical Database: U.S. Geological Survey, Reston, VA.	U.S. Geological Survey	USGS		44.3403	-109.808	0.01	18	18	18	ES	SEDIMENTARY	UNKNOWN	UNKNOWN	BRECCIA																						3	500	70	20	20
LCP806		USGS		Geochemistry of rock samples from the National Geochemical Database: U.S. Geological Survey, Reston, VA.	U.S. Geological Survey	USGS		44.3253	-109.648	0.01	18	18	18	AAS	SEDIMENTARY	UNKNOWN	UNKNOWN	BRECCIA																										20		35
LCP806		USGS		Geochemistry of rock samples from the National Geochemical Database: U.S. Geological Survey, Reston, VA.	U.S. Geological Survey	USGS		44.3253	-109.648	0.01	18	18	18	ES	SEDIMENTARY	UNKNOWN	UNKNOWN	BRECCIA																						3	500	50	15	15
LCP821		USGS		Geochemistry of rock samples from the National Geochemical Database: U.S. Geological Survey, Reston, VA.	U.S. Geological Survey	USGS		44.5006	-109.516	0.01	18	18	18	AAS	SEDIMENTARY	UNKNOWN	UNKNOWN	BRECCIA																										35		65
LCP821		USGS		Geochemistry of rock samples from the National Geochemical Database: U.S. Geological Survey, Reston, VA.	U.S. Geological Survey	USGS		44.5006	-109.516	0.01	18	18	18	ES	SEDIMENTARY	UNKNOWN	UNKNOWN	BRECCIA																						2	500	70	15	10
LCQ233		USGS		Geochemistry of rock samples from the National Geochemical Database: U.S. Geological Survey, Reston, VA.	U.S. Geological Survey	USGS		44.3989	-109.596	0.01	18	18	18	ES	SEDIMENTARY	UNKNOWN	UNKNOWN	BRECCIA																						5	1000	15	20	20
LCQ241		USGS		Geochemistry of rock samples from the National Geochemical Database: U.S. Geological Survey, Reston, VA.	U.S. Geological Survey	USGS		44.4811	-109.557	0.01	18	18	18	AAS	SEDIMENTARY	UNKNOWN	UNKNOWN	BRECCIA																										60		60
LCQ241		USGS		Geochemistry of rock samples from the National Geochemical Database: U.S. Geological Survey, Reston, VA.	U.S. Geological Survey	USGS		44.4811	-109.557	0.01	18	18	18	ES	SEDIMENTARY	UNKNOWN	UNKNOWN	BRECCIA																						2	500	7	10	15
LCQ242		USGS		Geochemistry of rock samples from the National Geochemical Database: U.S. Geological Survey, Reston, VA.	U.S. Geological Survey	USGS		44.4772	-109.55	0.01	18	18	18	AAS	SEDIMENTARY	UNKNOWN	UNKNOWN	BRECCIA																										35		45
LCQ242		USGS		Geochemistry of rock samples from the National Geochemical Database: U.S. Geological Survey, Reston, VA.	U.S. Geological Survey	USGS		44.4772	-109.55	0.01	18	18	18	ES	SEDIMENTARY	UNKNOWN	UNKNOWN	BRECCIA																						3	700	30	20	30
LCQ274		USGS		Geochemistry of rock samples from the National Geochemical Database: U.S. Geological Survey, Reston, VA.	U.S. Geological Survey	USGS		44.46	-109.539	0.01	18	18	18	AAS	SEDIMENTARY	UNKNOWN	UNKNOWN	BRECCIA																										25		60
LCQ274		USGS		Geochemistry of rock samples from the National Geochemical Database: U.S. Geological Survey, Reston, VA.	U.S. Geological Survey	USGS		44.46	-109.539	0.01	18	18	18	ES	SEDIMENTARY	UNKNOWN	UNKNOWN	BRECCIA																						2	300		10	10
LCQ277		USGS		Geochemistry of rock samples from the National Geochemical Database: U.S. Geological Survey, Reston, VA.	U.S. Geological Survey	USGS		44.4503	-109.536	0.01	18	18	18	AAS	SEDIMENTARY	UNKNOWN	UNKNOWN	BRECCIA																										40		45
LCQ277		USGS		Geochemistry of rock samples from the National Geochemical Database: U.S. Geological Survey, Reston, VA.	U.S. Geological Survey	USGS		44.4503	-109.536	0.01	18	18	18	ES	SEDIMENTARY	UNKNOWN	UNKNOWN	BRECCIA																						5	700	30	15	20
LCQ315		USGS		Geochemistry of rock samples from the National Geochemical Database: U.S. Geological Survey, Reston, VA.	U.S. Geological Survey	USGS		44.3275	-109.544	0.01	18	18	18	ES	SEDIMENTARY	UNKNOWN	UNKNOWN	BRECCIA																						3	700	10	20	20
LCQ537		USGS		Geochemistry of rock samples from the National Geochemical Database: U.S. Geological Survey, Reston, VA.	U.S. Geological Survey	USGS		44.4103	-109.653	0.01	18	18	18	ES	SEDIMENTARY	UNKNOWN	UNKNOWN	BRECCIA																						5	1000	10	15	10
LCQ551		USGS		Geochemistry of rock samples from the National Geochemical Database: U.S. Geological Survey, Reston, VA.	U.S. Geological Survey	USGS		44.3528	-109.786	0.01	18	18	18	ES	SEDIMENTARY	UNKNOWN	UNKNOWN	BRECCIA																						5	700	100	30	30
LCQ552		USGS		Geochemistry of rock samples from the National Geochemical Database: U.S. Geological Survey, Reston, VA.	U.S. Geological Survey	USGS		44.3539	-109.779	0.01	18	18	18	ES	SEDIMENTARY	UNKNOWN	UNKNOWN	BRECCIA																						5	700	100	20	30
LDB003		USGS		Geochemistry of rock samples from the National Geochemical Database: U.S. Geological Survey, Reston, VA.	U.S. Geological Survey	USGS		46.8686	-111.737	0.01	44	44	44	AAS	SEDIMENTARY	UNKNOWN	UNKNOWN	BRECCIA																										25		85
LDB003		USGS		Geochemistry of rock samples from the National Geochemical Database: U.S. Geological Survey, Reston, VA.	U.S. Geological Survey	USGS		46.8686	-111.737	0.01	44	44	44	ES	SEDIMENTARY	UNKNOWN	UNKNOWN	BRECCIA																						5	1000	50	15	30
LDB118		USGS		Geochemistry of rock samples from the National Geochemical Database: U.S. Geological Survey, Reston, VA.	U.S. Geological Survey	USGS		46.84	-111.851	0.01	55	55	55	ES	SEDIMENTARY	UNKNOWN	UNKNOWN	BRECCIA																						0.5	700	5
LDB124		USGS		Geochemistry of rock samples from the National Geochemical Database: U.S. Geological Survey, Reston, VA.	U.S. Geological Survey	USGS		46.8661	-111.851	0.01	55	55	55	ES	SEDIMENTARY	UNKNOWN	UNKNOWN	BRECCIA																							70
LDC084		USGS		Geochemistry of rock samples from the National Geochemical Database: U.S. Geological Survey, Reston, VA.	U.S. Geological Survey	USGS		44.2064	-109.317	0.01	18	18	18	ES	SEDIMENTARY	UNKNOWN	UNKNOWN	BRECCIA																						10	1000	50	50	50
LDC210		USGS		Geochemistry of rock samples from the National Geochemical Database: U.S. Geological Survey, Reston, VA.	U.S. Geological Survey	USGS		44.0483	-109.229	0.01	18	18	18	ES	SEDIMENTARY	UNKNOWN	UNKNOWN	BRECCIA																						10	1500	100	50	50
LDC224		USGS		Geochemistry of rock samples from the National Geochemical Database: U.S. Geological Survey, Reston, VA.	U.S. Geological Survey	USGS		44.0264	-109.329	0.01	18	18	18	ES	SEDIMENTARY	UNKNOWN	UNKNOWN	BRECCIA																						10	700	30	30	20
LDN669		USGS		Geochemistry of rock samples from the National Geochemical Database: U.S. Geological Survey, Reston, VA.	U.S. Geological Survey	USGS		46.2906	-111.888	0.01				AAS	SEDIMENTARY	UNKNOWN	UNKNOWN	BRECCIA																												140
LDN669		USGS		Geochemistry of rock samples from the National Geochemical Database: U.S. Geological Survey, Reston, VA.	U.S. Geological Survey	USGS		46.2906	-111.888	0.01				ES	SEDIMENTARY	UNKNOWN	UNKNOWN	BRECCIA																						5	150	30	20	50			3000	2
LDN670		USGS		Geochemistry of rock samples from the National Geochemical Database: U.S. Geological Survey, Reston, VA.	U.S. Geological Survey	USGS		46.2906	-111.888	0.01				AAS	SEDIMENTARY	UNKNOWN	UNKNOWN	BRECCIA																												5500
LDN670		USGS		Geochemistry of rock samples from the National Geochemical Database: U.S. Geological Survey, Reston, VA.	U.S. Geological Survey	USGS		46.2906	-111.888	0.01				ES	SEDIMENTARY	UNKNOWN	UNKNOWN	BRECCIA																						10	1000	150	20	200	200	10000		30
LDN690		USGS		Geochemistry of rock samples from the National Geochemical Database: U.S. Geological Survey, Reston, VA.	U.S. Geological Survey	USGS		46.2906	-111.888	0.01				AAS	SEDIMENTARY	UNKNOWN	UNKNOWN	BRECCIA																												120
LDN690		USGS		Geochemistry of rock samples from the National Geochemical Database: U.S. Geological Survey, Reston, VA.	U.S. Geological Survey	USGS		46.2906	-111.888	0.01				ES	SEDIMENTARY	UNKNOWN	UNKNOWN	BRECCIA																						7	500	20	10	30			1000	30
LDR285		USGS		Geochemistry of rock samples from the National Geochemical Database: U.S. Geological Survey, Reston, VA.	U.S. Geological Survey	USGS		44.0078	-109.61	0.01	18	18	18	AAS	SEDIMENTARY	UNKNOWN	UNKNOWN	BRECCIA																										10		70
LDR285		USGS		Geochemistry of rock samples from the National Geochemical Database: U.S. Geological Survey, Reston, VA.	U.S. Geological Survey	USGS		44.0078	-109.61	0.01	18	18	18	ES	SEDIMENTARY	UNKNOWN	UNKNOWN	BRECCIA																						7	1000	100	30	10
LDR333		USGS		Geochemistry of rock samples from the National Geochemical Database: U.S. Geological Survey, Reston, VA.	U.S. Geological Survey	USGS		44	-109.601	0.01	18	18	18	AAS	SEDIMENTARY	UNKNOWN	UNKNOWN	BRECCIA																										20		75
LDR333		USGS		Geochemistry of rock samples from the National Geochemical Database: U.S. Geological Survey, Reston, VA.	U.S. Geological Survey	USGS		44	-109.601	0.01	18	18	18	ES	SEDIMENTARY	UNKNOWN	UNKNOWN	BRECCIA																						10	700	50	30	30
LDR347		USGS		Geochemistry of rock samples from the National Geochemical Database: U.S. Geological Survey, Reston, VA.	U.S. Geological Survey	USGS		43.9956	-109.609	0.01	18	18	18	AAS	SEDIMENTARY	UNKNOWN	UNKNOWN	BRECCIA																										25		55
LDR347		USGS		Geochemistry of rock samples from the National Geochemical Database: U.S. Geological Survey, Reston, VA.	U.S. Geological Survey	USGS		43.9956	-109.609	0.01	18	18	18	ES	SEDIMENTARY	UNKNOWN	UNKNOWN	BRECCIA																						7	1500	30	20	30
LDR747		USGS		Geochemistry of rock samples from the National Geochemical Database: U.S. Geological Survey, Reston, VA.	U.S. Geological Survey	USGS		43.9589	-109.694	0.01	18	18	18	AAS	SEDIMENTARY	UNKNOWN	UNKNOWN	BRECCIA																										30		50
LDR747		USGS		Geochemistry of rock samples from the National Geochemical Database: U.S. Geological Survey, Reston, VA.	U.S. Geological Survey	USGS		43.9589	-109.694	0.01	18	18	18	ES	SEDIMENTARY	UNKNOWN	UNKNOWN	BRECCIA																						3	500	70	15	30
LDR883		USGS		Geochemistry of rock samples from the National Geochemical Database: U.S. Geological Survey, Reston, VA.	U.S. Geological Survey	USGS		44.2544	-109.73	0.01	18	18	18	AAS	SEDIMENTARY	UNKNOWN	UNKNOWN	BRECCIA																										75		20
LDR883		USGS		Geochemistry of rock samples from the National Geochemical Database: U.S. Geological Survey, Reston, VA.	U.S. Geological Survey	USGS		44.2544	-109.73	0.01	18	18	18	ES	SEDIMENTARY	UNKNOWN	UNKNOWN	BRECCIA																						5	70	7		50
LDY998		USGS		Geochemistry of rock samples from the National Geochemical Database: U.S. Geological Survey, Reston, VA.	U.S. Geological Survey	USGS		46.7667	-109.497	0.01	43	43	43	AAS	SEDIMENTARY	UNKNOWN	UNKNOWN	BRECCIA																												20
LDY998		USGS		Geochemistry of rock samples from the National Geochemical Database: U.S. Geological Survey, Reston, VA.	U.S. Geological Survey	USGS		46.7667	-109.497	0.01	43	43	43	ES	SEDIMENTARY	UNKNOWN	UNKNOWN	BRECCIA																						0.5	70	7
LEI808		USGS		Geochemistry of rock samples from the National Geochemical Database: U.S. Geological Survey, Reston, VA.	U.S. Geological Survey	USGS		41.5589	-106.233	0.01	50	50	50	COL	SEDIMENTARY	UNKNOWN	UNKNOWN	BRECCIA
LEI808		USGS		Geochemistry of rock samples from the National Geochemical Database: U.S. Geological Survey, Reston, VA.	U.S. Geological Survey	USGS		41.5589	-106.233	0.01	50	50	50	ES	SEDIMENTARY	UNKNOWN	UNKNOWN	BRECCIA																						10	300	70	10	70				2
LEI808		USGS		Geochemistry of rock samples from the National Geochemical Database: U.S. Geological Survey, Reston, VA.	U.S. Geological Survey	USGS		41.5589	-106.233	0.01	50	50	50	FLUOR	SEDIMENTARY	UNKNOWN	UNKNOWN	BRECCIA
LFV813		USGS		Geochemistry of rock samples from the National Geochemical Database: U.S. Geological Survey, Reston, VA.	U.S. Geological Survey	USGS		41.1953	-106.407	0.01				ES	SEDIMENTARY	UNKNOWN	UNKNOWN	BRECCIA																						5	2000	5		10
LFV813		USGS		Geochemistry of rock samples from the National Geochemical Database: U.S. Geological Survey, Reston, VA.	U.S. Geological Survey	USGS		41.1953	-106.407	0.01				FLUOR	SEDIMENTARY	UNKNOWN	UNKNOWN	BRECCIA
LFV814		USGS		Geochemistry of rock samples from the National Geochemical Database: U.S. Geological Survey, Reston, VA.	U.S. Geological Survey	USGS		41.1953	-106.407	0.01				ES	SEDIMENTARY	UNKNOWN	UNKNOWN	BRECCIA																						2	1000			50
LFV814		USGS		Geochemistry of rock samples from the National Geochemical Database: U.S. Geological Survey, Reston, VA.	U.S. Geological Survey	USGS		41.1953	-106.407	0.01				FLUOR	SEDIMENTARY	UNKNOWN	UNKNOWN	BRECCIA
LGD288		USGS		Geochemistry of rock samples from the National Geochemical Database: U.S. Geological Survey, Reston, VA.	U.S. Geological Survey	USGS		48.3453	-121.233	0.01				AAS	SEDIMENTARY	UNKNOWN	UNKNOWN	BRECCIA
LGD288		USGS		Geochemistry of rock samples from the National Geochemical Database: U.S. Geological Survey, Reston, VA.	U.S. Geological Survey	USGS		48.3453	-121.233	0.01				ES	SEDIMENTARY	UNKNOWN	UNKNOWN	BRECCIA																						5	700	5		70				10
LGD761		USGS		Geochemistry of rock samples from the National Geochemical Database: U.S. Geological Survey, Reston, VA.	U.S. Geological Survey	USGS		48.2064	-120.967	0.01				AAS	SEDIMENTARY	UNKNOWN	UNKNOWN	BRECCIA
LGD761		USGS		Geochemistry of rock samples from the National Geochemical Database: U.S. Geological Survey, Reston, VA.	U.S. Geological Survey	USGS		48.2064	-120.967	0.01				ES	SEDIMENTARY	UNKNOWN	UNKNOWN	BRECCIA																						3	70			200			7000	5
LGD764		USGS		Geochemistry of rock samples from the National Geochemical Database: U.S. Geological Survey, Reston, VA.	U.S. Geological Survey	USGS		48.2044	-120.968	0.01				ES	SEDIMENTARY	UNKNOWN	UNKNOWN	BRECCIA																						5	50	15	7	50			200	1
LGD765		USGS		Geochemistry of rock samples from the National Geochemical Database: U.S. Geological Survey, Reston, VA.	U.S. Geological Survey	USGS		48.2044	-120.968	0.01				AAS	SEDIMENTARY	UNKNOWN	UNKNOWN	BRECCIA
LGD765		USGS		Geochemistry of rock samples from the National Geochemical Database: U.S. Geological Survey, Reston, VA.	U.S. Geological Survey	USGS		48.2044	-120.968	0.01				ES	SEDIMENTARY	UNKNOWN	UNKNOWN	BRECCIA																						5	30	10		50			1500	1
LGF527		USGS		Geochemistry of rock samples from the National Geochemical Database: U.S. Geological Survey, Reston, VA.	U.S. Geological Survey	USGS		37.5933	-88.3894	0.01	70	70	70	ES	SEDIMENTARY	UNKNOWN	UNKNOWN	BRECCIA																						0.7	200	5	10
LGF527		USGS		Geochemistry of rock samples from the National Geochemical Database: U.S. Geological Survey, Reston, VA.	U.S. Geological Survey	USGS		37.5933	-88.3894	0.01	70	70	70	FLUOR	SEDIMENTARY	UNKNOWN	UNKNOWN	BRECCIA
LGF527		USGS		Geochemistry of rock samples from the National Geochemical Database: U.S. Geological Survey, Reston, VA.	U.S. Geological Survey	USGS		37.5933	-88.3894	0.01	70	70	70	ISE	SEDIMENTARY	UNKNOWN	UNKNOWN	BRECCIA
LGF529		USGS		Geochemistry of rock samples from the National Geochemical Database: U.S. Geological Survey, Reston, VA.	U.S. Geological Survey	USGS		37.5933	-88.3894	0.01	70	70	70	ES	SEDIMENTARY	UNKNOWN	UNKNOWN	BRECCIA																						2	700	10	20	5
LGF529		USGS		Geochemistry of rock samples from the National Geochemical Database: U.S. Geological Survey, Reston, VA.	U.S. Geological Survey	USGS		37.5933	-88.3894	0.01	70	70	70	FLUOR	SEDIMENTARY	UNKNOWN	UNKNOWN	BRECCIA
LGF529		USGS		Geochemistry of rock samples from the National Geochemical Database: U.S. Geological Survey, Reston, VA.	U.S. Geological Survey	USGS		37.5933	-88.3894	0.01	70	70	70	ISE	SEDIMENTARY	UNKNOWN	UNKNOWN	BRECCIA
LGN534		USGS		Geochemistry of rock samples from the National Geochemical Database: U.S. Geological Survey, Reston, VA.	U.S. Geological Survey	USGS		42.7086	-109.15	0.01	66	66	66	ES	SEDIMENTARY	UNKNOWN	UNKNOWN	BRECCIA																						2	100	5
LGN537		USGS		Geochemistry of rock samples from the National Geochemical Database: U.S. Geological Survey, Reston, VA.	U.S. Geological Survey	USGS		42.7422	-109.239	0.01	66	66	66	ES	SEDIMENTARY	UNKNOWN	UNKNOWN	BRECCIA																						2	500	20	10	20
LHL290		USGS		Geochemistry of rock samples from the National Geochemical Database: U.S. Geological Survey, Reston, VA.	U.S. Geological Survey	USGS		43.3347	-110.993	0.01				AAS	SEDIMENTARY	UNKNOWN	UNKNOWN	BRECCIA																											0.2	25
LHL290		USGS		Geochemistry of rock samples from the National Geochemical Database: U.S. Geological Survey, Reston, VA.	U.S. Geological Survey	USGS		43.3347	-110.993	0.01				ES	SEDIMENTARY	UNKNOWN	UNKNOWN	BRECCIA																						3	100			10
M105633		USGS		Geochemistry of rock samples from the National Geochemical Database: U.S. Geological Survey, Reston, VA.	U.S. Geological Survey	USGS		67.4917	-145.442	0.01	56	63.5	71	AAS	SEDIMENTARY	UNKNOWN	UNKNOWN	BRECCIA											1.2	5	4	1.8
M105633		USGS		Geochemistry of rock samples from the National Geochemical Database: U.S. Geological Survey, Reston, VA.	U.S. Geological Survey	USGS		67.4917	-145.442	0.01	56	63.5	71	COL	SEDIMENTARY	UNKNOWN	UNKNOWN	BRECCIA		65.7	0.29	16.4		2				0.13					0.18
M105633		USGS		Geochemistry of rock samples from the National Geochemical Database: U.S. Geological Survey, Reston, VA.	U.S. Geological Survey	USGS		67.4917	-145.442	0.01	56	63.5	71	ES	SEDIMENTARY	UNKNOWN	UNKNOWN	BRECCIA																						3	1000	3	20	15
M105633		USGS		Geochemistry of rock samples from the National Geochemical Database: U.S. Geological Survey, Reston, VA.	U.S. Geological Survey	USGS		67.4917	-145.442	0.01	56	63.5	71	TITR	SEDIMENTARY	UNKNOWN	UNKNOWN	BRECCIA								1.4
M105937		USGS		Geochemistry of rock samples from the National Geochemical Database: U.S. Geological Survey, Reston, VA.	U.S. Geological Survey	USGS		30.5833	-102.917	0.01	65	65	65	UNKNOWN	SEDIMENTARY	UNKNOWN	UNKNOWN	BRECCIA																					1	0.15	70			5
M149419		USGS		Geochemistry of rock samples from the National Geochemical Database: U.S. Geological Survey, Reston, VA.	U.S. Geological Survey	USGS		60.3333	-147.65	0.01	22	22	22	ES	SEDIMENTARY	UNKNOWN	UNKNOWN	BRECCIA																					12	31.9	730	120	360	6000	1	200
M149429		USGS		Geochemistry of rock samples from the National Geochemical Database: U.S. Geological Survey, Reston, VA.	U.S. Geological Survey	USGS		60.3333	-147.65	0.01	22	22	22	ES	SEDIMENTARY	UNKNOWN	UNKNOWN	BRECCIA																					18	19.9	740	66	130	4700	0.5	120
M149433		USGS		Geochemistry of rock samples from the National Geochemical Database: U.S. Geological Survey, Reston, VA.	U.S. Geological Survey	USGS		60.3333	-147.65	0.01	22	22	22	ES	SEDIMENTARY	UNKNOWN	UNKNOWN	BRECCIA																					33	17.4	300	17	21	4600	8	11000
M149436		USGS		Geochemistry of rock samples from the National Geochemical Database: U.S. Geological Survey, Reston, VA.	U.S. Geological Survey	USGS		60.3333	-147.65	0.01	22	22	22	ES	SEDIMENTARY	UNKNOWN	UNKNOWN	BRECCIA																					26	19.3	470	40	130	9300	0.68	200	10
M149442		USGS		Geochemistry of rock samples from the National Geochemical Database: U.S. Geological Survey, Reston, VA.	U.S. Geological Survey	USGS		60.3333	-147.65	0.01	22	22	22	ES	SEDIMENTARY	UNKNOWN	UNKNOWN	BRECCIA																						43	560	42	230	7300	1.6	290
M149448		USGS		Geochemistry of rock samples from the National Geochemical Database: U.S. Geological Survey, Reston, VA.	U.S. Geological Survey	USGS		60.3333	-147.65	0.01	22	22	22	ES	SEDIMENTARY	UNKNOWN	UNKNOWN	BRECCIA																					28	20	480	31	120	4500	2.1	140	18
M153513		USGS		Geochemistry of rock samples from the National Geochemical Database: U.S. Geological Survey, Reston, VA.	U.S. Geological Survey	USGS		16.3411	134.874	0.01				ICPAES	SEDIMENTARY	UNKNOWN	UNKNOWN	BRECCIA																						7.4	1900	31	32	150		60
M153513		USGS		Geochemistry of rock samples from the National Geochemical Database: U.S. Geological Survey, Reston, VA.	U.S. Geological Survey	USGS		16.3411	134.874	0.01				UNKNOWN	SEDIMENTARY	UNKNOWN	UNKNOWN	BRECCIA								0.99
M153513		USGS		Geochemistry of rock samples from the National Geochemical Database: U.S. Geological Survey, Reston, VA.	U.S. Geological Survey	USGS		16.3411	134.874	0.01				XRF	SEDIMENTARY	UNKNOWN	UNKNOWN	BRECCIA		44.2	0.73	14.4						0.28	4.57	2.42	3.03	3.21
M155837		USGS		Geochemistry of rock samples from the National Geochemical Database: U.S. Geological Survey, Reston, VA.	U.S. Geological Survey	USGS		57.1333	-157.067	0.01	2	2	2	TITR	SEDIMENTARY	UNKNOWN	UNKNOWN	BRECCIA								1.79
M155837		USGS		Geochemistry of rock samples from the National Geochemical Database: U.S. Geological Survey, Reston, VA.	U.S. Geological Survey	USGS		57.1333	-157.067	0.01	2	2	2	XRF	SEDIMENTARY	UNKNOWN	UNKNOWN	BRECCIA		63.9	0.66	16.7						0.15	2.1	5.61	3.58	1.23	0.21
M155845		USGS		Geochemistry of rock samples from the National Geochemical Database: U.S. Geological Survey, Reston, VA.	U.S. Geological Survey	USGS		57.15	-156.933	0.01	6	6	6	TITR	SEDIMENTARY	UNKNOWN	UNKNOWN	BRECCIA								5.41
M155845		USGS		Geochemistry of rock samples from the National Geochemical Database: U.S. Geological Survey, Reston, VA.	U.S. Geological Survey	USGS		57.15	-156.933	0.01	6	6	6	XRF	SEDIMENTARY	UNKNOWN	UNKNOWN	BRECCIA		55.5	1.01	16.7						0.16	4.88	9.05	2.62	1.12	0.17
M160574		USGS		Geochemistry of rock samples from the National Geochemical Database: U.S. Geological Survey, Reston, VA.	U.S. Geological Survey	USGS		57.005	-157.155	0.01	2	2	2	TITR	SEDIMENTARY	UNKNOWN	UNKNOWN	BRECCIA								1.55
M160574		USGS		Geochemistry of rock samples from the National Geochemical Database: U.S. Geological Survey, Reston, VA.	U.S. Geological Survey	USGS		57.005	-157.155	0.01	2	2	2	XRF	SEDIMENTARY	UNKNOWN	UNKNOWN	BRECCIA		59.2	0.91	17.2						0.14	3.19	6.77	2.9	1.36	0.18
M165516		USGS		Geochemistry of rock samples from the National Geochemical Database: U.S. Geological Survey, Reston, VA.	U.S. Geological Survey	USGS		68.2333	-157.833	0.01	71	63	55	AAS	SEDIMENTARY	UNKNOWN	UNKNOWN	BRECCIA																											130		64	69
M165516		USGS		Geochemistry of rock samples from the National Geochemical Database: U.S. Geological Survey, Reston, VA.	U.S. Geological Survey	USGS		68.2333	-157.833	0.01	71	63	55	ES	SEDIMENTARY	UNKNOWN	UNKNOWN	BRECCIA																					34.2	1.4			60	150		92000
M165516		USGS		Geochemistry of rock samples from the National Geochemical Database: U.S. Geological Survey, Reston, VA.	U.S. Geological Survey	USGS		68.2333	-157.833	0.01	71	63	55	XRF	SEDIMENTARY	UNKNOWN	UNKNOWN	BRECCIA
M165518		USGS		Geochemistry of rock samples from the National Geochemical Database: U.S. Geological Survey, Reston, VA.	U.S. Geological Survey	USGS		68.2333	-157.833	0.01	71	63	55	AAS	SEDIMENTARY	UNKNOWN	UNKNOWN	BRECCIA																											86		54	170
M165518		USGS		Geochemistry of rock samples from the National Geochemical Database: U.S. Geological Survey, Reston, VA.	U.S. Geological Survey	USGS		68.2333	-157.833	0.01	71	63	55	ES	SEDIMENTARY	UNKNOWN	UNKNOWN	BRECCIA																					30	0.34			40	450		28000
M165518		USGS		Geochemistry of rock samples from the National Geochemical Database: U.S. Geological Survey, Reston, VA.	U.S. Geological Survey	USGS		68.2333	-157.833	0.01	71	63	55	XRF	SEDIMENTARY	UNKNOWN	UNKNOWN	BRECCIA
M165520		USGS		Geochemistry of rock samples from the National Geochemical Database: U.S. Geological Survey, Reston, VA.	U.S. Geological Survey	USGS		68.2333	-157.833	0.01	71	63	55	AAS	SEDIMENTARY	UNKNOWN	UNKNOWN	BRECCIA																											130		45	320
M165520		USGS		Geochemistry of rock samples from the National Geochemical Database: U.S. Geological Survey, Reston, VA.	U.S. Geological Survey	USGS		68.2333	-157.833	0.01	71	63	55	ES	SEDIMENTARY	UNKNOWN	UNKNOWN	BRECCIA																					26.5	0.7			40	470		53500
M165520		USGS		Geochemistry of rock samples from the National Geochemical Database: U.S. Geological Survey, Reston, VA.	U.S. Geological Survey	USGS		68.2333	-157.833	0.01	71	63	55	XRF	SEDIMENTARY	UNKNOWN	UNKNOWN	BRECCIA
M173475		USGS		Geochemistry of rock samples from the National Geochemical Database: U.S. Geological Survey, Reston, VA.	U.S. Geological Survey	USGS		34.3833	-116.783	0.01				ES	SEDIMENTARY	UNKNOWN	UNKNOWN	BRECCIA																								9.2		58	7.6		6.7
M175712		USGS		Geochemistry of rock samples from the National Geochemical Database: U.S. Geological Survey, Reston, VA.	U.S. Geological Survey	USGS		41.1667	-117.283	0.01	69	69	69	AAS	SEDIMENTARY	UNKNOWN	UNKNOWN	BRECCIA																													260	0.59
M175712		USGS		Geochemistry of rock samples from the National Geochemical Database: U.S. Geological Survey, Reston, VA.	U.S. Geological Survey	USGS		41.1667	-117.283	0.01	69	69	69	ES	SEDIMENTARY	UNKNOWN	UNKNOWN	BRECCIA																								20		140
M175712		USGS		Geochemistry of rock samples from the National Geochemical Database: U.S. Geological Survey, Reston, VA.	U.S. Geological Survey	USGS		41.1667	-117.283	0.01	69	69	69	FAP	SEDIMENTARY	UNKNOWN	UNKNOWN	BRECCIA
M175712		USGS		Geochemistry of rock samples from the National Geochemical Database: U.S. Geological Survey, Reston, VA.	U.S. Geological Survey	USGS		41.1667	-117.283	0.01	69	69	69	ICPAES	SEDIMENTARY	UNKNOWN	UNKNOWN	BRECCIA																												32
M176443		USGS		Geochemistry of rock samples from the National Geochemical Database: U.S. Geological Survey, Reston, VA.	U.S. Geological Survey	USGS		40.25	-116.733	0.01				ES	SEDIMENTARY	UNKNOWN	UNKNOWN	BRECCIA																						0.8		7.5	4.3		0.12		470
M180661		USGS		Geochemistry of rock samples from the National Geochemical Database: U.S. Geological Survey, Reston, VA.	U.S. Geological Survey	USGS		61.3203	-153.454	0.01	11	38	65	ICPAES	SEDIMENTARY	UNKNOWN	UNKNOWN	BRECCIA																						3.7	800	3	8	14		86
M180661		USGS		Geochemistry of rock samples from the National Geochemical Database: U.S. Geological Survey, Reston, VA.	U.S. Geological Survey	USGS		61.3203	-153.454	0.01	11	38	65	MISC	SEDIMENTARY	UNKNOWN	UNKNOWN	BRECCIA																	0.56
M180661		USGS		Geochemistry of rock samples from the National Geochemical Database: U.S. Geological Survey, Reston, VA.	U.S. Geological Survey	USGS		61.3203	-153.454	0.01	11	38	65	TITR	SEDIMENTARY	UNKNOWN	UNKNOWN	BRECCIA								3.67
M180661		USGS		Geochemistry of rock samples from the National Geochemical Database: U.S. Geological Survey, Reston, VA.	U.S. Geological Survey	USGS		61.3203	-153.454	0.01	11	38	65	XRF	SEDIMENTARY	UNKNOWN	UNKNOWN	BRECCIA		65.8	0.67	15						0.11	1.16	1.96	5.53	3.58	0.19
M182695		USGS		Geochemistry of rock samples from the National Geochemical Database: U.S. Geological Survey, Reston, VA.	U.S. Geological Survey	USGS		40	-116	0.01	43	43	43	AAS	SEDIMENTARY	UNKNOWN	UNKNOWN	BRECCIA
M182695		USGS		Geochemistry of rock samples from the National Geochemical Database: U.S. Geological Survey, Reston, VA.	U.S. Geological Survey	USGS		40	-116	0.01	43	43	43	ICPAES	SEDIMENTARY	UNKNOWN	UNKNOWN	BRECCIA																						13	350	12	3	19	0.7	20	81
M193386		USGS		Geochemistry of rock samples from the National Geochemical Database: U.S. Geological Survey, Reston, VA.	U.S. Geological Survey	USGS		56.4681	-132.023	0.01	11	11	11	AAS	SEDIMENTARY	UNKNOWN	UNKNOWN	BRECCIA
M193386		USGS		Geochemistry of rock samples from the National Geochemical Database: U.S. Geological Survey, Reston, VA.	U.S. Geological Survey	USGS		56.4681	-132.023	0.01	11	11	11	ICPAES	SEDIMENTARY	UNKNOWN	UNKNOWN	BRECCIA																						0.68	230	15	2	120		120		7
M197057		USGS		Geochemistry of rock samples from the National Geochemical Database: U.S. Geological Survey, Reston, VA.	U.S. Geological Survey	USGS		7.34278	-134.688	0.01				MISC	SEDIMENTARY	UNKNOWN	UNKNOWN	BRECCIA																	44.2
M197057		USGS		Geochemistry of rock samples from the National Geochemical Database: U.S. Geological Survey, Reston, VA.	U.S. Geological Survey	USGS		7.34278	-134.688	0.01				TITR	SEDIMENTARY	UNKNOWN	UNKNOWN	BRECCIA
M197057		USGS		Geochemistry of rock samples from the National Geochemical Database: U.S. Geological Survey, Reston, VA.	U.S. Geological Survey	USGS		7.34278	-134.688	0.01				XRF	SEDIMENTARY	UNKNOWN	UNKNOWN	BRECCIA		0.21		0.14						0.01	3.77	51
M199103		USGS		Geochemistry of rock samples from the National Geochemical Database: U.S. Geological Survey, Reston, VA.	U.S. Geological Survey	USGS		61.4547	-153.086	0.01	3	34	65	MISC	SEDIMENTARY	UNKNOWN	UNKNOWN	BRECCIA																	0.99
M199103		USGS		Geochemistry of rock samples from the National Geochemical Database: U.S. Geological Survey, Reston, VA.	U.S. Geological Survey	USGS		61.4547	-153.086	0.01	3	34	65	TITR	SEDIMENTARY	UNKNOWN	UNKNOWN	BRECCIA								2.77
M199103		USGS		Geochemistry of rock samples from the National Geochemical Database: U.S. Geological Survey, Reston, VA.	U.S. Geological Survey	USGS		61.4547	-153.086	0.01	3	34	65	XRF	SEDIMENTARY	UNKNOWN	UNKNOWN	BRECCIA		69.1	0.44	14.9						0.11	0.56	1.66	5.27	2.24	0.15													67
MAB194		USGS		Geochemistry of rock samples from the National Geochemical Database: U.S. Geological Survey, Reston, VA.	U.S. Geological Survey	USGS		-8.81389	116.812	0.01	11	11	11	ES	SEDIMENTARY	UNKNOWN	UNKNOWN	BRECCIA																						15	100	5		30
MBJ426		USGS		Geochemistry of rock samples from the National Geochemical Database: U.S. Geological Survey, Reston, VA.	U.S. Geological Survey	USGS		35.7153	-116.884	0.01				AAS	SEDIMENTARY	UNKNOWN	UNKNOWN	BRECCIA																											1.2	25	30
MBJ426		USGS		Geochemistry of rock samples from the National Geochemical Database: U.S. Geological Survey, Reston, VA.	U.S. Geological Survey	USGS		35.7153	-116.884	0.01				ES	SEDIMENTARY	UNKNOWN	UNKNOWN	BRECCIA																						10	100	5		50				1.5
MBJ469		USGS		Geochemistry of rock samples from the National Geochemical Database: U.S. Geological Survey, Reston, VA.	U.S. Geological Survey	USGS		33.5356	-115.719	0.01				AAS	SEDIMENTARY	UNKNOWN	UNKNOWN	BRECCIA																											0.2	25
MBJ469		USGS		Geochemistry of rock samples from the National Geochemical Database: U.S. Geological Survey, Reston, VA.	U.S. Geological Survey	USGS		33.5356	-115.719	0.01				ES	SEDIMENTARY	UNKNOWN	UNKNOWN	BRECCIA																						1.5	2000	5		5
MBJ494		USGS		Geochemistry of rock samples from the National Geochemical Database: U.S. Geological Survey, Reston, VA.	U.S. Geological Survey	USGS		37.2036	-117.446	0.01				AAS	SEDIMENTARY	UNKNOWN	UNKNOWN	BRECCIA																												5
MBJ494		USGS		Geochemistry of rock samples from the National Geochemical Database: U.S. Geological Survey, Reston, VA.	U.S. Geological Survey	USGS		37.2036	-117.446	0.01				ES	SEDIMENTARY	UNKNOWN	UNKNOWN	BRECCIA																						2	300	15
MBJ494		USGS		Geochemistry of rock samples from the National Geochemical Database: U.S. Geological Survey, Reston, VA.	U.S. Geological Survey	USGS		37.2036	-117.446	0.01				ISE	SEDIMENTARY	UNKNOWN	UNKNOWN	BRECCIA
W171922		USGS		Geochemistry of rock samples from the National Geochemical Database: U.S. Geological Survey, Reston, VA.	U.S. Geological Survey	USGS		32.3667	-107.367	0.01	3	3	3	UNKNOWN	SEDIMENTARY	UNKNOWN	UNKNOWN	BRECCIA		69	1.2	13		2.5		0.08		0.1	0.6	2.1	0.6	9	0.12
W227267		USGS		Geochemistry of rock samples from the National Geochemical Database: U.S. Geological Survey, Reston, VA.	U.S. Geological Survey	USGS		35.5	-80.0167	0.01				AAS	SEDIMENTARY	UNKNOWN	UNKNOWN	BRECCIA																													200
W227267		USGS		Geochemistry of rock samples from the National Geochemical Database: U.S. Geological Survey, Reston, VA.	U.S. Geological Survey	USGS		35.5	-80.0167	0.01				UNKNOWN	SEDIMENTARY	UNKNOWN	UNKNOWN	BRECCIA
W227268		USGS		Geochemistry of rock samples from the National Geochemical Database: U.S. Geological Survey, Reston, VA.	U.S. Geological Survey	USGS		35.5	-80.0167	0.01				AAS	SEDIMENTARY	UNKNOWN	UNKNOWN	BRECCIA																													200
W231959		USGS		Geochemistry of rock samples from the National Geochemical Database: U.S. Geological Survey, Reston, VA.	U.S. Geological Survey	USGS		35.7503	-79.9667	0.01	67	69.5	72	ES	SEDIMENTARY	UNKNOWN	UNKNOWN	BRECCIA																						2.7	370	16	5.9	33		260		200
W231959		USGS		Geochemistry of rock samples from the National Geochemical Database: U.S. Geological Survey, Reston, VA.	U.S. Geological Survey	USGS		35.7503	-79.9667	0.01	67	69.5	72	UNKNOWN	SEDIMENTARY	UNKNOWN	UNKNOWN	BRECCIA																														150
W236487		USGS		Geochemistry of rock samples from the National Geochemical Database: U.S. Geological Survey, Reston, VA.	U.S. Geological Survey	USGS		48.3	-95.4333	0.01	66	66	66	AAS	SEDIMENTARY	UNKNOWN	UNKNOWN	BRECCIA		58.6	0.03	1.7		18.2				0.66	1.7	4.2	0.02	0.5	0.01
W236487		USGS		Geochemistry of rock samples from the National Geochemical Database: U.S. Geological Survey, Reston, VA.	U.S. Geological Survey	USGS		48.3	-95.4333	0.01	66	66	66	ES	SEDIMENTARY	UNKNOWN	UNKNOWN	BRECCIA																					31	13	9400	6.6	1.4	31		130		1.2
W236487		USGS		Geochemistry of rock samples from the National Geochemical Database: U.S. Geological Survey, Reston, VA.	U.S. Geological Survey	USGS		48.3	-95.4333	0.01	66	66	66	UNKNOWN	SEDIMENTARY	UNKNOWN	UNKNOWN	BRECCIA
W237092		USGS		Geochemistry of rock samples from the National Geochemical Database: U.S. Geological Survey, Reston, VA.	U.S. Geological Survey	USGS		48.4775	-94.9228	0.01	66	66	66	ES	SEDIMENTARY	UNKNOWN	UNKNOWN	BRECCIA																					27		13000	80	58	140		160		2
AK51		GEOROC	10.1016/0899-5362(86)90025-4	PETROGRAPHIC AND CHEMICAL CHARACTERISTICS OF THE PANDA HILL CARBONATITE COMPLEX, TANZANIA	J. AFR. EARTH SCI.	BASU, N. K.; MAYILA, A.		-2.75	33.48	0.01				NOT	SEDIMENTARY			BRECCIA		39.4	1.06	10.4			11			0.38	4.3	9.27	1.1	8.01	1.6	0.67
AK40		GEOROC	10.1016/0899-5362(86)90025-4	PETROGRAPHIC AND CHEMICAL CHARACTERISTICS OF THE PANDA HILL CARBONATITE COMPLEX, TANZANIA	J. AFR. EARTH SCI.	BASU, N. K.; MAYILA, A.		-2.75	33.48	0.01				NOT	SEDIMENTARY			BRECCIA		30.5	1.75	7.4			10.17			0.41	4.5	17.6	1	6.72	2.5	0.77
AK92		GEOROC	10.1016/0899-5362(86)90025-4	PETROGRAPHIC AND CHEMICAL CHARACTERISTICS OF THE PANDA HILL CARBONATITE COMPLEX, TANZANIA	J. AFR. EARTH SCI.	BASU, N. K.; MAYILA, A.		-2.75	33.48	0.01				NOT	SEDIMENTARY			BRECCIA		52.6	0.5	13.9			6.5			0.3	1.7	3.69	3	7.07	0.49	1.8
2804.5		GEOROC	10.1002/2016GC006595	ELEMENTAL CHANGES AND ALTERATION RECORDED BY BASALTIC DRILL CORE SAMPLES RECOVERED FROM IN SITU TEMPERATURES UP TO 345°C IN THE ACTIVE, SEAWATER-RECHARGED REYKJANES GEOTHERMAL SYSTEM, ICELAND	GEOCHEMISTRY GEOPHYSICS GEOSYSTEMS	FOWLER, A. P. G.; ZIERENBERG, R. A.		64	-23	0.1				XRF	SEDIMENTARY			BRECCIA		46.41	0.61	14.47					8.66	0.22	9.46	15.42	0.97	0.05	0.04									155		0		142
2804.5		GEOROC	10.1002/2016GC006595	ELEMENTAL CHANGES AND ALTERATION RECORDED BY BASALTIC DRILL CORE SAMPLES RECOVERED FROM IN SITU TEMPERATURES UP TO 345°C IN THE ACTIVE, SEAWATER-RECHARGED REYKJANES GEOTHERMAL SYSTEM, ICELAND	GEOCHEMISTRY GEOPHYSICS GEOSYSTEMS	FOWLER, A. P. G.; ZIERENBERG, R. A.		64	-23	0.1				IGN	SEDIMENTARY			BRECCIA																	2.52
2804.5		GEOROC	10.1002/2016GC006595	ELEMENTAL CHANGES AND ALTERATION RECORDED BY BASALTIC DRILL CORE SAMPLES RECOVERED FROM IN SITU TEMPERATURES UP TO 345°C IN THE ACTIVE, SEAWATER-RECHARGED REYKJANES GEOTHERMAL SYSTEM, ICELAND	GEOCHEMISTRY GEOPHYSICS GEOSYSTEMS	FOWLER, A. P. G.; ZIERENBERG, R. A.		64	-23	0.1				ICPMS	SEDIMENTARY			BRECCIA
2804.8		GEOROC	10.1002/2016GC006595	ELEMENTAL CHANGES AND ALTERATION RECORDED BY BASALTIC DRILL CORE SAMPLES RECOVERED FROM IN SITU TEMPERATURES UP TO 345°C IN THE ACTIVE, SEAWATER-RECHARGED REYKJANES GEOTHERMAL SYSTEM, ICELAND	GEOCHEMISTRY GEOPHYSICS GEOSYSTEMS	FOWLER, A. P. G.; ZIERENBERG, R. A.		64	-23	0.1				XRF	SEDIMENTARY			BRECCIA		45.28	0.57	15.05					9.84	0.24	8.36	16.38	0.82	0.04	0.03									135		0		142
2804.8		GEOROC	10.1002/2016GC006595	ELEMENTAL CHANGES AND ALTERATION RECORDED BY BASALTIC DRILL CORE SAMPLES RECOVERED FROM IN SITU TEMPERATURES UP TO 345°C IN THE ACTIVE, SEAWATER-RECHARGED REYKJANES GEOTHERMAL SYSTEM, ICELAND	GEOCHEMISTRY GEOPHYSICS GEOSYSTEMS	FOWLER, A. P. G.; ZIERENBERG, R. A.		64	-23	0.1				IGN	SEDIMENTARY			BRECCIA																	2.49
2804.8		GEOROC	10.1002/2016GC006595	ELEMENTAL CHANGES AND ALTERATION RECORDED BY BASALTIC DRILL CORE SAMPLES RECOVERED FROM IN SITU TEMPERATURES UP TO 345°C IN THE ACTIVE, SEAWATER-RECHARGED REYKJANES GEOTHERMAL SYSTEM, ICELAND	GEOCHEMISTRY GEOPHYSICS GEOSYSTEMS	FOWLER, A. P. G.; ZIERENBERG, R. A.		64	-23	0.1				ICPMS	SEDIMENTARY			BRECCIA
02DS86		GEOROC	10.1016/j.lithos.2005.12.005	MANTLE PROCESSES IN AN ARCHEAN OROGEN: EVIDENCE FROM 2.67 GA DIAMOND-BEARING LAMPROPHYRES AND XENOLITHS	LITHOS	WYMAN, D. A.; AYER, J. A.; CONCEICAO, R. V.; SAGE, R. P.		48	-85	0.1				XRF	SEDIMENTARY			BRECCIA		48	0.74	8.99			11.03			0.17	19.75	10.06	1.09	0.27	0.33
02DS86		GEOROC	10.1016/j.lithos.2005.12.005	MANTLE PROCESSES IN AN ARCHEAN OROGEN: EVIDENCE FROM 2.67 GA DIAMOND-BEARING LAMPROPHYRES AND XENOLITHS	LITHOS	WYMAN, D. A.; AYER, J. A.; CONCEICAO, R. V.; SAGE, R. P.		48	-85	0.1				ICPMS	SEDIMENTARY			BRECCIA																								830	79	595		104
02DS87		GEOROC	10.1016/j.lithos.2005.12.005	MANTLE PROCESSES IN AN ARCHEAN OROGEN: EVIDENCE FROM 2.67 GA DIAMOND-BEARING LAMPROPHYRES AND XENOLITHS	LITHOS	WYMAN, D. A.; AYER, J. A.; CONCEICAO, R. V.; SAGE, R. P.		48	-85	0.1				XRF	SEDIMENTARY			BRECCIA		47	0.72	9.31			11.01			0.17	20.36	10.19	0.92	0.23	0.33
02DS87		GEOROC	10.1016/j.lithos.2005.12.005	MANTLE PROCESSES IN AN ARCHEAN OROGEN: EVIDENCE FROM 2.67 GA DIAMOND-BEARING LAMPROPHYRES AND XENOLITHS	LITHOS	WYMAN, D. A.; AYER, J. A.; CONCEICAO, R. V.; SAGE, R. P.		48	-85	0.1				ICPMS	SEDIMENTARY			BRECCIA																								840	80			108
02DS8989		GEOROC	10.1016/j.lithos.2005.12.005	MANTLE PROCESSES IN AN ARCHEAN OROGEN: EVIDENCE FROM 2.67 GA DIAMOND-BEARING LAMPROPHYRES AND XENOLITHS	LITHOS	WYMAN, D. A.; AYER, J. A.; CONCEICAO, R. V.; SAGE, R. P.		48	-85	0.1				XRF	SEDIMENTARY			BRECCIA		47	0.75	8.95			10.77			0.17	21.56	9.73	0.32	0.21	0.32
02DS8989		GEOROC	10.1016/j.lithos.2005.12.005	MANTLE PROCESSES IN AN ARCHEAN OROGEN: EVIDENCE FROM 2.67 GA DIAMOND-BEARING LAMPROPHYRES AND XENOLITHS	LITHOS	WYMAN, D. A.; AYER, J. A.; CONCEICAO, R. V.; SAGE, R. P.		48	-85	0.1				ICPMS	SEDIMENTARY			BRECCIA																								821	79	26		111
02DS88		GEOROC	10.1016/j.lithos.2005.12.005	MANTLE PROCESSES IN AN ARCHEAN OROGEN: EVIDENCE FROM 2.67 GA DIAMOND-BEARING LAMPROPHYRES AND XENOLITHS	LITHOS	WYMAN, D. A.; AYER, J. A.; CONCEICAO, R. V.; SAGE, R. P.		48	-85	0.1				XRF	SEDIMENTARY			BRECCIA		51	0.85	11.23			11.13			0.18	13.18	8.79	2.49	1.21	0.23
02DS88		GEOROC	10.1016/j.lithos.2005.12.005	MANTLE PROCESSES IN AN ARCHEAN OROGEN: EVIDENCE FROM 2.67 GA DIAMOND-BEARING LAMPROPHYRES AND XENOLITHS	LITHOS	WYMAN, D. A.; AYER, J. A.; CONCEICAO, R. V.; SAGE, R. P.		48	-85	0.1				ICPMS	SEDIMENTARY			BRECCIA																								435	68	68		103
02DS9090		GEOROC	10.1016/j.lithos.2005.12.005	MANTLE PROCESSES IN AN ARCHEAN OROGEN: EVIDENCE FROM 2.67 GA DIAMOND-BEARING LAMPROPHYRES AND XENOLITHS	LITHOS	WYMAN, D. A.; AYER, J. A.; CONCEICAO, R. V.; SAGE, R. P.		48	-85	0.1				XRF	SEDIMENTARY			BRECCIA		52	1.11	14.08			11.73			0.19	8.9	6.27	4.23	1.23	0.13
02DS9090		GEOROC	10.1016/j.lithos.2005.12.005	MANTLE PROCESSES IN AN ARCHEAN OROGEN: EVIDENCE FROM 2.67 GA DIAMOND-BEARING LAMPROPHYRES AND XENOLITHS	LITHOS	WYMAN, D. A.; AYER, J. A.; CONCEICAO, R. V.; SAGE, R. P.		48	-85	0.1				ICPMS	SEDIMENTARY			BRECCIA																								263	66	77		90
02DS9494		GEOROC	10.1016/j.lithos.2005.12.005	MANTLE PROCESSES IN AN ARCHEAN OROGEN: EVIDENCE FROM 2.67 GA DIAMOND-BEARING LAMPROPHYRES AND XENOLITHS	LITHOS	WYMAN, D. A.; AYER, J. A.; CONCEICAO, R. V.; SAGE, R. P.		48	-85	0.1				XRF	SEDIMENTARY			BRECCIA		53	0.68	10.92			9.03			0.13	13.47	6.98	3.48	1.59	0.24
02DS9494		GEOROC	10.1016/j.lithos.2005.12.005	MANTLE PROCESSES IN AN ARCHEAN OROGEN: EVIDENCE FROM 2.67 GA DIAMOND-BEARING LAMPROPHYRES AND XENOLITHS	LITHOS	WYMAN, D. A.; AYER, J. A.; CONCEICAO, R. V.; SAGE, R. P.		48	-85	0.1				ICPMS	SEDIMENTARY			BRECCIA																								504	56	13		84
02DS9696		GEOROC	10.1016/j.lithos.2005.12.005	MANTLE PROCESSES IN AN ARCHEAN OROGEN: EVIDENCE FROM 2.67 GA DIAMOND-BEARING LAMPROPHYRES AND XENOLITHS	LITHOS	WYMAN, D. A.; AYER, J. A.; CONCEICAO, R. V.; SAGE, R. P.		48	-85	0.1				XRF	SEDIMENTARY			BRECCIA		49	0.9	12.5			10.75			0.16	10.28	8.44	2.79	4.37	0.37
02DS9696		GEOROC	10.1016/j.lithos.2005.12.005	MANTLE PROCESSES IN AN ARCHEAN OROGEN: EVIDENCE FROM 2.67 GA DIAMOND-BEARING LAMPROPHYRES AND XENOLITHS	LITHOS	WYMAN, D. A.; AYER, J. A.; CONCEICAO, R. V.; SAGE, R. P.		48	-85	0.1				ICPMS	SEDIMENTARY			BRECCIA																								336	61	46		111
MUSQ1		GEOROC	10.1016/j.lithos.2005.12.005	MANTLE PROCESSES IN AN ARCHEAN OROGEN: EVIDENCE FROM 2.67 GA DIAMOND-BEARING LAMPROPHYRES AND XENOLITHS	LITHOS	WYMAN, D. A.; AYER, J. A.; CONCEICAO, R. V.; SAGE, R. P.		48	-85	0.1				XRF	SEDIMENTARY			BRECCIA		50.28	1.03	12.41			10.73			0.14	9.52	8.36	2.32	4.9	0.32
MUSQ1		GEOROC	10.1016/j.lithos.2005.12.005	MANTLE PROCESSES IN AN ARCHEAN OROGEN: EVIDENCE FROM 2.67 GA DIAMOND-BEARING LAMPROPHYRES AND XENOLITHS	LITHOS	WYMAN, D. A.; AYER, J. A.; CONCEICAO, R. V.; SAGE, R. P.		48	-85	0.1				ICPMS	SEDIMENTARY			BRECCIA																								239	49	193		94
GG687		GEOROC	10.1016/j.lithos.2005.12.005	MANTLE PROCESSES IN AN ARCHEAN OROGEN: EVIDENCE FROM 2.67 GA DIAMOND-BEARING LAMPROPHYRES AND XENOLITHS	LITHOS	WYMAN, D. A.; AYER, J. A.; CONCEICAO, R. V.; SAGE, R. P.		48	-85	0.1				XRF	SEDIMENTARY			BRECCIA		47.62	0.82	14.61			11.45			0.17	11.5	9.74	2.25	1.6	0.24
GG687		GEOROC	10.1016/j.lithos.2005.12.005	MANTLE PROCESSES IN AN ARCHEAN OROGEN: EVIDENCE FROM 2.67 GA DIAMOND-BEARING LAMPROPHYRES AND XENOLITHS	LITHOS	WYMAN, D. A.; AYER, J. A.; CONCEICAO, R. V.; SAGE, R. P.		48	-85	0.1				ICPMS	SEDIMENTARY			BRECCIA																								337	48			94
[truncated: 87 more columns]

## Sheet: References
References
AUTHOR	YEAR	TITLE	JOURNAL
BASU, N. K.; MAYILA, A.	1986	PETROGRAPHIC AND CHEMICAL CHARACTERISTICS OF THE PANDA HILL CARBONATITE COMPLEX, TANZANIA	J. AFR. EARTH SCI.
BASU, N. K.; MAYILA, A.	1986	PETROGRAPHIC AND CHEMICAL CHARACTERISTICS OF THE PANDA HILL CARBONATITE COMPLEX, TANZANIA	J. AFR. EARTH SCI.
BASU, N. K.; MAYILA, A.	1986	PETROGRAPHIC AND CHEMICAL CHARACTERISTICS OF THE PANDA HILL CARBONATITE COMPLEX, TANZANIA	J. AFR. EARTH SCI.
CHAKRABARTI, R.; BASU, A. R.	2006	TRACE ELEMENT AND ISOTOPIC EVIDENCE FOR ARCHEAN BASEMENT IN THE LONAR CRATER IMPACT BRECCIA, DECCAN VOLCANIC PROVINCE	EARTH PLANET. SCI. LETT.
CHAKRABARTI, R.; BASU, A. R.	2006	TRACE ELEMENT AND ISOTOPIC EVIDENCE FOR ARCHEAN BASEMENT IN THE LONAR CRATER IMPACT BRECCIA, DECCAN VOLCANIC PROVINCE	EARTH PLANET. SCI. LETT.
CHAKRABARTI, R.; BASU, A. R.	2006	TRACE ELEMENT AND ISOTOPIC EVIDENCE FOR ARCHEAN BASEMENT IN THE LONAR CRATER IMPACT BRECCIA, DECCAN VOLCANIC PROVINCE	EARTH PLANET. SCI. LETT.
CHAKRABARTI, R.; BASU, A. R.	2006	TRACE ELEMENT AND ISOTOPIC EVIDENCE FOR ARCHEAN BASEMENT IN THE LONAR CRATER IMPACT BRECCIA, DECCAN VOLCANIC PROVINCE	EARTH PLANET. SCI. LETT.
CHAKRABARTI, R.; BASU, A. R.	2006	TRACE ELEMENT AND ISOTOPIC EVIDENCE FOR ARCHEAN BASEMENT IN THE LONAR CRATER IMPACT BRECCIA, DECCAN VOLCANIC PROVINCE	EARTH PLANET. SCI. LETT.
FOWLER, A. P. G.; ZIERENBERG, R. A.	2016	ELEMENTAL CHANGES AND ALTERATION RECORDED BY BASALTIC DRILL CORE SAMPLES RECOVERED FROM IN SITU TEMPERATURES UP TO 345°C IN THE ACTIVE, SEAWATER-RECHARGED REYKJANES GEOTHERMAL SYSTEM, ICELAND	GEOCHEMISTRY GEOPHYSICS GEOSYSTEMS
FOWLER, A. P. G.; ZIERENBERG, R. A.	2016	ELEMENTAL CHANGES AND ALTERATION RECORDED BY BASALTIC DRILL CORE SAMPLES RECOVERED FROM IN SITU TEMPERATURES UP TO 345°C IN THE ACTIVE, SEAWATER-RECHARGED REYKJANES GEOTHERMAL SYSTEM, ICELAND	GEOCHEMISTRY GEOPHYSICS GEOSYSTEMS
GRAHAM, I. J.; GULSON, B. L.; HEDENQUIST, J. W.; MIZON, K.	1992	PETROGENESIS OF LATE CENOZOIC VOLCANIC ROCKS FROM THE TAUPO VOLCANIC ZONE, NEW ZEALAND, IN THE LIGHT OF NEW LEAD ISOTOPE DATA	GEOCHIM. COSMOCHIM. ACTA
GRAHAM, I. J.; GULSON, B. L.; HEDENQUIST, J. W.; MIZON, K.	1992	PETROGENESIS OF LATE CENOZOIC VOLCANIC ROCKS FROM THE TAUPO VOLCANIC ZONE, NEW ZEALAND, IN THE LIGHT OF NEW LEAD ISOTOPE DATA	GEOCHIM. COSMOCHIM. ACTA
GRAHAM, I. J.; GULSON, B. L.; HEDENQUIST, J. W.; MIZON, K.	1992	PETROGENESIS OF LATE CENOZOIC VOLCANIC ROCKS FROM THE TAUPO VOLCANIC ZONE, NEW ZEALAND, IN THE LIGHT OF NEW LEAD ISOTOPE DATA	GEOCHIM. COSMOCHIM. ACTA
GRAHAM, I. J.; GULSON, B. L.; HEDENQUIST, J. W.; MIZON, K.	1992	PETROGENESIS OF LATE CENOZOIC VOLCANIC ROCKS FROM THE TAUPO VOLCANIC ZONE, NEW ZEALAND, IN THE LIGHT OF NEW LEAD ISOTOPE DATA	GEOCHIM. COSMOCHIM. ACTA
GRAHAM, I. J.; GULSON, B. L.; HEDENQUIST, J. W.; MIZON, K.	1992	PETROGENESIS OF LATE CENOZOIC VOLCANIC ROCKS FROM THE TAUPO VOLCANIC ZONE, NEW ZEALAND, IN THE LIGHT OF NEW LEAD ISOTOPE DATA	GEOCHIM. COSMOCHIM. ACTA
ISHIZUKA O.; YUASA M.; KURIMOTO C.	1997	unpublished	unpublished
IWABUCHI Y.	1999	unpublished	unpublished
JANSE, A. J. A.	1969	GROSS BRUKKAROS, A PROBABLE CARBONATITE VOLCANO IN THE NAMA PLATEAU OF SOUTHWEST AFRICA	BULL. GEOL. SOC. AM.
JANSE, A. J. A.	1969	GROSS BRUKKAROS, A PROBABLE CARBONATITE VOLCANO IN THE NAMA PLATEAU OF SOUTHWEST AFRICA	BULL. GEOL. SOC. AM.
JANSE, A. J. A.	1969	GROSS BRUKKAROS, A PROBABLE CARBONATITE VOLCANO IN THE NAMA PLATEAU OF SOUTHWEST AFRICA	BULL. GEOL. SOC. AM.
JANSE, A. J. A.	1969	GROSS BRUKKAROS, A PROBABLE CARBONATITE VOLCANO IN THE NAMA PLATEAU OF SOUTHWEST AFRICA	BULL. GEOL. SOC. AM.
JANSE, A. J. A.	1969	GROSS BRUKKAROS, A PROBABLE CARBONATITE VOLCANO IN THE NAMA PLATEAU OF SOUTHWEST AFRICA	BULL. GEOL. SOC. AM.
JANSE, A. J. A.	1969	GROSS BRUKKAROS, A PROBABLE CARBONATITE VOLCANO IN THE NAMA PLATEAU OF SOUTHWEST AFRICA	BULL. GEOL. SOC. AM.
JOHNS, S. M.; HELMSTAEDT, H. H.; KYSER, T. K.	2006	PALEOPROTEROZOIC SUBMARINE INTRABASINAL RIFTING, BAFFIN ISLAND, NUNAVUT, CANADA: VOLCANIC STRUCTURE AND GEOCHEMISTRY OF THE BRAVO LAKE FORMATION	CAN. J. EARTH SCI.
JOHNS, S. M.; KYSER, T. K.; HELMSTAEDT, H. H.	2006	CHARACTER OF FLUIDS ASSOCIATED WITH HYDROTHERMAL ALTERATION AND METAMORPHISM OF PALAEOPROTEROZOIC SUBMARINE VOLCANIC ROCKS, BAFFIN ISLAND, NUNAVUT, CANADA	PREC. RESEARCH
NAKA J.; HOTTA H.	1990	unpublished	unpublished
NAUCHI R.; MORISHITA T.; TAMURA A.; ARAI S.; SATO H.; ICHIYAMA Y.	2011	unpublished	unpublished
NEUMANN, E.-R.; SVENSEN, H.; GALERNE, C. Y.; PLANKE, S.	2011	MULTISTAGE EVOLUTION OF DOLERITES IN THE KAROO LARGE IGNEOUS PROVINCE, CENTRAL SOUTH AFRICA	J. PETROL.
NORMAN D.M.; GARCIA O.M.; BENNETT C. V.	2004	unpublished	unpublished
PRINS, P.	1981	THE GEOCHEMICAL EVOLUTION OF THE ALKALINE AND CARBONATITE COMPLEXES OF THE DAMARALAND IGNEOUS PROVINCE, SOUTH WEST AFRICA	ANN. UNIV. STELLENBOSCH SER. A1 (GEOL.)
REVILLON, S.; TEAGLE, D. A. H.; BOULVAIS, P.; SHAFER, J. T.; NEAL, C. R.	2007	GEOCHEMICAL FLUXES RELATED TO ALTERATION OF A SUBAERIALLY EXPOSED SEAMOUNT: NINTOKU SEAMOUNT, ODP LEG 197, SITE 1205	GEOCHEMISTRY GEOPHYSICS GEOSYSTEMS
REVILLON, S.; TEAGLE, D. A. H.; BOULVAIS, P.; SHAFER, J. T.; NEAL, C. R.	2007	GEOCHEMICAL FLUXES RELATED TO ALTERATION OF A SUBAERIALLY EXPOSED SEAMOUNT: NINTOKU SEAMOUNT, ODP LEG 197, SITE 1205	GEOCHEMISTRY GEOPHYSICS GEOSYSTEMS
ROCK, N. M. S.	1976	THE COMPARATIVE STRONTIUM ISOTOPIC COMPOSITION OF ALKALINE ROCKS: NEW DATA FROM SOUTHERN PORTUGAL AND EAST AFRICA	CONTRIB. MINERAL. PETROL.
SHINOZAKI K.; REN Z-Y.; TAKAHASHI E.	2002	unpublished	unpublished
SHUKUNO H.; TAMURA Y.; TANI K.; CHANG Q.; SUZUKI T.; FISKE R.S.	2006	unpublished	unpublished
TAMURA Y.; GILL J.B.; TOLLSTRUP D.; KAWABATA H.; SHUKUNO H.; CHANG O.; MIYAZAKI T.; TAKAHASHI T.; HIRAHARA Y.; KODAIRA S.; ISHIZUKA O.; SUZUKI T.; KIDO Y.; FISKE R.S.; TATSUMI Y.	2009	unpublished	unpublished
TAMURA Y.; KAWABATA H.	2007	unpublished	unpublished
TAMURA Y.; TANI K.; ISHIZUKA O.; CHANG Q.; SHUKUNO H.; FISKE R.S.	2005	unpublished	unpublished
TANI K.; DUNKLEY D.J.; KIMURA J.; WYSOCZANSKI R.J.; YAMADA K.; TATSUMI Y.	2010	unpublished	unpublished
USGS	2008	Geochemistry of rock samples from the National Geochemical Database: U.S. Geological Survey, Reston, VA.	U.S. Geological Survey
WYMAN, D. A.; AYER, J. A.; CONCEICAO, R. V.; SAGE, R. P.	2006	MANTLE PROCESSES IN AN ARCHEAN OROGEN: EVIDENCE FROM 2.67 GA DIAMOND-BEARING LAMPROPHYRES AND XENOLITHS	LITHOS
WYMAN, D. A.; AYER, J. A.; CONCEICAO, R. V.; SAGE, R. P.	2006	MANTLE PROCESSES IN AN ARCHEAN OROGEN: EVIDENCE FROM 2.67 GA DIAMOND-BEARING LAMPROPHYRES AND XENOLITHS	LITHOS
WYMAN, D. A.; AYER, J. A.; CONCEICAO, R. V.; SAGE, R. P.	2006	MANTLE PROCESSES IN AN ARCHEAN OROGEN: EVIDENCE FROM 2.67 GA DIAMOND-BEARING LAMPROPHYRES AND XENOLITHS	LITHOS
WYMAN, D. A.; AYER, J. A.; CONCEICAO, R. V.; SAGE, R. P.	2006	MANTLE PROCESSES IN AN ARCHEAN OROGEN: EVIDENCE FROM 2.67 GA DIAMOND-BEARING LAMPROPHYRES AND XENOLITHS	LITHOS
WYMAN, D. A.; AYER, J. A.; CONCEICAO, R. V.; SAGE, R. P.	2006	MANTLE PROCESSES IN AN ARCHEAN OROGEN: EVIDENCE FROM 2.67 GA DIAMOND-BEARING LAMPROPHYRES AND XENOLITHS	LITHOS
WYMAN, D. A.; AYER, J. A.; CONCEICAO, R. V.; SAGE, R. P.	2006	MANTLE PROCESSES IN AN ARCHEAN OROGEN: EVIDENCE FROM 2.67 GA DIAMOND-BEARING LAMPROPHYRES AND XENOLITHS	LITHOS
WYMAN, D. A.; AYER, J. A.; CONCEICAO, R. V.; SAGE, R. P.	2006	MANTLE PROCESSES IN AN ARCHEAN OROGEN: EVIDENCE FROM 2.67 GA DIAMOND-BEARING LAMPROPHYRES AND XENOLITHS	LITHOS
WYMAN, D. A.; AYER, J. A.; CONCEICAO, R. V.; SAGE, R. P.	2006	MANTLE PROCESSES IN AN ARCHEAN OROGEN: EVIDENCE FROM 2.67 GA DIAMOND-BEARING LAMPROPHYRES AND XENOLITHS	LITHOS
WYMAN, D. A.; AYER, J. A.; CONCEICAO, R. V.; SAGE, R. P.	2006	MANTLE PROCESSES IN AN ARCHEAN OROGEN: EVIDENCE FROM 2.67 GA DIAMOND-BEARING LAMPROPHYRES AND XENOLITHS	LITHOS
YUASA M.	1995	unpublished	unpublished
