# Supplementary material for: Basic chemical compositions combination rules and quantitative criterion of red beds
Source: Copernicus journal article supplement (doi:10.5194/egusphere-2023-2590), 2024-01-29
Supplement: Supplementary file 4 [file Supplementary Table 12-claystone_EarthChem.xlsx]

## Sheet: Data
EarthChem Download: Wednesday, May. 10, 2023 7:52:37 am
Search Criteria:
Material	sedimentary
Rock Name	claystone
SAMPLE ID	IGSN	SOURCE	DOI	TITLE	JOURNAL	AUTHOR	CRUISEID	LATITUDE	LONGITUDE	LOC PREC	MIN AGE	AGE	MAX AGE	METHOD	MATERIAL	TYPE	COMPOSITION	ROCK NAME	MINERAL	SIO2	TIO2	AL2O3	CR2O3	FE2O3	FE2O3T	FEO	MNO	MGO	CAO	NA2O	K2O	P2O5	BAO	LOI	H2O	H2O_M	H2O_P	SO3	V2O5	SI	FE	MN	NI	CO	CU	CD	ZN	AS	AG
120-750B-13H-1,50-51		GEOROC	10.2973/odp.proc.sr.120.132.1992	COMPOSITION AND ORIGIN OF MARINE ASH LAYERS AND EPICLASTIC ROCKS FROM THE KERGUELEN PLATEAU, SOUTHERN INDIAN OCEAN (LEGS 119 AND 120)	PROC. OCEAN DRILL. PROGRAM, SCIENT. RESULTS	BITSCHENE, P. R.; MEHL, K. W.; SCHMINCKE, H.-U.		-57.792	81.2395	0.0001				XRF	SEDIMENTARY			CLAYSTONE		31.6	2.45	36.4			11.08		0.03	0.28	0.29	0.72	0.03	0.1											82	51	105		112
120-750B-13H-1,50-51		GEOROC	10.2973/odp.proc.sr.120.132.1992	COMPOSITION AND ORIGIN OF MARINE ASH LAYERS AND EPICLASTIC ROCKS FROM THE KERGUELEN PLATEAU, SOUTHERN INDIAN OCEAN (LEGS 119 AND 120)	PROC. OCEAN DRILL. PROGRAM, SCIENT. RESULTS	BITSCHENE, P. R.; MEHL, K. W.; SCHMINCKE, H.-U.		-57.792	81.2395	0.0001				TIT	SEDIMENTARY			CLAYSTONE																	16.03
120-750B-14H-2,25-26		GEOROC	10.2973/odp.proc.sr.120.132.1992	COMPOSITION AND ORIGIN OF MARINE ASH LAYERS AND EPICLASTIC ROCKS FROM THE KERGUELEN PLATEAU, SOUTHERN INDIAN OCEAN (LEGS 119 AND 120)	PROC. OCEAN DRILL. PROGRAM, SCIENT. RESULTS	BITSCHENE, P. R.; MEHL, K. W.; SCHMINCKE, H.-U.		-57.792	81.2395	0.0001				TIT	SEDIMENTARY			CLAYSTONE																	12.92
120-750B-14H-2,25-26		GEOROC	10.2973/odp.proc.sr.120.132.1992	COMPOSITION AND ORIGIN OF MARINE ASH LAYERS AND EPICLASTIC ROCKS FROM THE KERGUELEN PLATEAU, SOUTHERN INDIAN OCEAN (LEGS 119 AND 120)	PROC. OCEAN DRILL. PROGRAM, SCIENT. RESULTS	BITSCHENE, P. R.; MEHL, K. W.; SCHMINCKE, H.-U.		-57.792	81.2395	0.0001				XRF	SEDIMENTARY			CLAYSTONE		39.3	1.16	22.41			22.13		0.07	1.88	0.71	1.07	0.11	0.03											155	158	186		131
200-1223A-4X-2,58		GEOROC	10.2973/odp.proc.ir.200.103.2003	SITE 1223	INIT. REP. DEEP SEA DRILL. PROJ.	STEPHEN, R. A.; KASAHARA, J.; ACTON, G. D.; CALHOUN, R. S.; HARAGUCHI, S.; HOSKINS, H.; KITTREDGE, S.; LUSTRINO, M.; MANZ, W.; NAKAMURA, M.; NATLAND, J. H.; NIELSEN, I.; PAUL, H.; SCHUMANN-KINDEL, G.; SHERMAN, S. B.; SUN, Y.-E.; WILSON, J.		22.9735	-155.654	0.0001				ICPAES	SEDIMENTARY			CLAYSTONE		48.5	2.19	12.57			11.78		0.22	12.46	6.17	3.38	0.9	0.17											325
200-1223A-4X-2,58		GEOROC	10.2973/odp.proc.ir.200.103.2003	SITE 1223	INIT. REP. DEEP SEA DRILL. PROJ.	STEPHEN, R. A.; KASAHARA, J.; ACTON, G. D.; CALHOUN, R. S.; HARAGUCHI, S.; HOSKINS, H.; KITTREDGE, S.; LUSTRINO, M.; MANZ, W.; NAKAMURA, M.; NATLAND, J. H.; NIELSEN, I.; PAUL, H.; SCHUMANN-KINDEL, G.; SHERMAN, S. B.; SUN, Y.-E.; WILSON, J.		22.9735	-155.654	0.0001				IGN	SEDIMENTARY			CLAYSTONE																8.84
200-1223A-4X-2,140		GEOROC	10.2973/odp.proc.ir.200.103.2003	SITE 1223	INIT. REP. DEEP SEA DRILL. PROJ.	STEPHEN, R. A.; KASAHARA, J.; ACTON, G. D.; CALHOUN, R. S.; HARAGUCHI, S.; HOSKINS, H.; KITTREDGE, S.; LUSTRINO, M.; MANZ, W.; NAKAMURA, M.; NATLAND, J. H.; NIELSEN, I.; PAUL, H.; SCHUMANN-KINDEL, G.; SHERMAN, S. B.; SUN, Y.-E.; WILSON, J.		22.9735	-155.654	0.0001				ICPAES	SEDIMENTARY			CLAYSTONE		50.62	2.23	12.25			10.79		0.2	12.76	6.15	3.14	0.75	0.22											316
200-1223A-4X-2,140		GEOROC	10.2973/odp.proc.ir.200.103.2003	SITE 1223	INIT. REP. DEEP SEA DRILL. PROJ.	STEPHEN, R. A.; KASAHARA, J.; ACTON, G. D.; CALHOUN, R. S.; HARAGUCHI, S.; HOSKINS, H.; KITTREDGE, S.; LUSTRINO, M.; MANZ, W.; NAKAMURA, M.; NATLAND, J. H.; NIELSEN, I.; PAUL, H.; SCHUMANN-KINDEL, G.; SHERMAN, S. B.; SUN, Y.-E.; WILSON, J.		22.9735	-155.654	0.0001				IGN	SEDIMENTARY			CLAYSTONE																9.21
200-1223A-6X-CC,29		GEOROC	10.2973/odp.proc.ir.200.103.2003	SITE 1223	INIT. REP. DEEP SEA DRILL. PROJ.	STEPHEN, R. A.; KASAHARA, J.; ACTON, G. D.; CALHOUN, R. S.; HARAGUCHI, S.; HOSKINS, H.; KITTREDGE, S.; LUSTRINO, M.; MANZ, W.; NAKAMURA, M.; NATLAND, J. H.; NIELSEN, I.; PAUL, H.; SCHUMANN-KINDEL, G.; SHERMAN, S. B.; SUN, Y.-E.; WILSON, J.		22.9735	-155.654	0.0001				ICPAES	SEDIMENTARY			CLAYSTONE		50.67	2.18	12.79			11.66		0.21	10.9	5.61	4.68	0.9	0.19											328
200-1223A-6X-CC,29		GEOROC	10.2973/odp.proc.ir.200.103.2003	SITE 1223	INIT. REP. DEEP SEA DRILL. PROJ.	STEPHEN, R. A.; KASAHARA, J.; ACTON, G. D.; CALHOUN, R. S.; HARAGUCHI, S.; HOSKINS, H.; KITTREDGE, S.; LUSTRINO, M.; MANZ, W.; NAKAMURA, M.; NATLAND, J. H.; NIELSEN, I.; PAUL, H.; SCHUMANN-KINDEL, G.; SHERMAN, S. B.; SUN, Y.-E.; WILSON, J.		22.9735	-155.654	0.0001				IGN	SEDIMENTARY			CLAYSTONE																6.69
2003085201		GEOROC	10.1007/s00126-010-0281-z	TYPECASTING PROSPECTIVE AU-BEARING SEDIMENTARY LITHOLOGIES USING SEDIMENTARY GEOCHEMISTRY AND ND ISOTOPES IN POORLY EXPOSED PROTEROZOIC BASINS OF THE TANAMI REGION, NORTHERN AUSTRALIA	MINER. DEPOSITA	LAMBECK, A.; HUSTON, D. L.; BAROVICH, K. M.		-20.5224	130.944	1e-05				XRF	SEDIMENTARY			CLAYSTONE		56.1	1.5	16			14.4		0.1	4.2	1.2	1.3	1.9	0.1						1.5							95		148
2003085201		GEOROC	10.1007/s00126-010-0281-z	TYPECASTING PROSPECTIVE AU-BEARING SEDIMENTARY LITHOLOGIES USING SEDIMENTARY GEOCHEMISTRY AND ND ISOTOPES IN POORLY EXPOSED PROTEROZOIC BASINS OF THE TANAMI REGION, NORTHERN AUSTRALIA	MINER. DEPOSITA	LAMBECK, A.; HUSTON, D. L.; BAROVICH, K. M.		-20.5224	130.944	1e-05				IGN	SEDIMENTARY			CLAYSTONE																2.1
2003085201		GEOROC	10.1007/s00126-010-0281-z	TYPECASTING PROSPECTIVE AU-BEARING SEDIMENTARY LITHOLOGIES USING SEDIMENTARY GEOCHEMISTRY AND ND ISOTOPES IN POORLY EXPOSED PROTEROZOIC BASINS OF THE TANAMI REGION, NORTHERN AUSTRALIA	MINER. DEPOSITA	LAMBECK, A.; HUSTON, D. L.; BAROVICH, K. M.		-20.5224	130.944	1e-05				ICPMS	SEDIMENTARY			CLAYSTONE																														0	0.2
2003085092		GEOROC	10.1007/s00126-010-0281-z	TYPECASTING PROSPECTIVE AU-BEARING SEDIMENTARY LITHOLOGIES USING SEDIMENTARY GEOCHEMISTRY AND ND ISOTOPES IN POORLY EXPOSED PROTEROZOIC BASINS OF THE TANAMI REGION, NORTHERN AUSTRALIA	MINER. DEPOSITA	LAMBECK, A.; HUSTON, D. L.; BAROVICH, K. M.		-20.5224	130.944	1e-05				XRF	SEDIMENTARY			CLAYSTONE		57.7	0.9	14.8			11.7		0.1	5.3	1.2	2.8	1	0.2						0.1							62		92
2003085092		GEOROC	10.1007/s00126-010-0281-z	TYPECASTING PROSPECTIVE AU-BEARING SEDIMENTARY LITHOLOGIES USING SEDIMENTARY GEOCHEMISTRY AND ND ISOTOPES IN POORLY EXPOSED PROTEROZOIC BASINS OF THE TANAMI REGION, NORTHERN AUSTRALIA	MINER. DEPOSITA	LAMBECK, A.; HUSTON, D. L.; BAROVICH, K. M.		-20.5224	130.944	1e-05				IGN	SEDIMENTARY			CLAYSTONE																4.1
2003085092		GEOROC	10.1007/s00126-010-0281-z	TYPECASTING PROSPECTIVE AU-BEARING SEDIMENTARY LITHOLOGIES USING SEDIMENTARY GEOCHEMISTRY AND ND ISOTOPES IN POORLY EXPOSED PROTEROZOIC BASINS OF THE TANAMI REGION, NORTHERN AUSTRALIA	MINER. DEPOSITA	LAMBECK, A.; HUSTON, D. L.; BAROVICH, K. M.		-20.5224	130.944	1e-05				ICPMS	SEDIMENTARY			CLAYSTONE																														9.5	0.1
2003085280		GEOROC	10.1007/s00126-010-0281-z	TYPECASTING PROSPECTIVE AU-BEARING SEDIMENTARY LITHOLOGIES USING SEDIMENTARY GEOCHEMISTRY AND ND ISOTOPES IN POORLY EXPOSED PROTEROZOIC BASINS OF THE TANAMI REGION, NORTHERN AUSTRALIA	MINER. DEPOSITA	LAMBECK, A.; HUSTON, D. L.; BAROVICH, K. M.		-20.5224	130.944	1e-05				XRF	SEDIMENTARY			CLAYSTONE		65.7	0.9	14.3			9.4		0	2.1	0.4	0.5	3.4	0.1						0.1							69		64
2003085280		GEOROC	10.1007/s00126-010-0281-z	TYPECASTING PROSPECTIVE AU-BEARING SEDIMENTARY LITHOLOGIES USING SEDIMENTARY GEOCHEMISTRY AND ND ISOTOPES IN POORLY EXPOSED PROTEROZOIC BASINS OF THE TANAMI REGION, NORTHERN AUSTRALIA	MINER. DEPOSITA	LAMBECK, A.; HUSTON, D. L.; BAROVICH, K. M.		-20.5224	130.944	1e-05				IGN	SEDIMENTARY			CLAYSTONE																2.9
2003085280		GEOROC	10.1007/s00126-010-0281-z	TYPECASTING PROSPECTIVE AU-BEARING SEDIMENTARY LITHOLOGIES USING SEDIMENTARY GEOCHEMISTRY AND ND ISOTOPES IN POORLY EXPOSED PROTEROZOIC BASINS OF THE TANAMI REGION, NORTHERN AUSTRALIA	MINER. DEPOSITA	LAMBECK, A.; HUSTON, D. L.; BAROVICH, K. M.		-20.5224	130.944	1e-05				ICPMS	SEDIMENTARY			CLAYSTONE																														0	0
ABI263		USGS		Geochemistry of rock samples from the National Geochemical Database: U.S. Geological Survey, Reston, VA.	U.S. Geological Survey	USGS		35.2642	-106.202	0.01				AAS	SEDIMENTARY	UNKNOWN	UNKNOWN	CLAYSTONE																											160		220		0.85
ABI263		USGS		Geochemistry of rock samples from the National Geochemical Database: U.S. Geological Survey, Reston, VA.	U.S. Geological Survey	USGS		35.2642	-106.202	0.01				ES	SEDIMENTARY	UNKNOWN	UNKNOWN	CLAYSTONE																							7	700	700	15	150
AD624		USGS		Geochemistry of rock samples from the National Geochemical Database: U.S. Geological Survey, Reston, VA.	U.S. Geological Survey	USGS		17.9992	-67.1739	0.01				AAS	SEDIMENTARY	UNKNOWN	UNKNOWN	CLAYSTONE																													27
AD624		USGS		Geochemistry of rock samples from the National Geochemical Database: U.S. Geological Survey, Reston, VA.	U.S. Geological Survey	USGS		17.9992	-67.1739	0.01				ES	SEDIMENTARY	UNKNOWN	UNKNOWN	CLAYSTONE																							7	1000	15	20	70
AD679		USGS		Geochemistry of rock samples from the National Geochemical Database: U.S. Geological Survey, Reston, VA.	U.S. Geological Survey	USGS		18.0792	-67.1292	0.01				AAS	SEDIMENTARY	UNKNOWN	UNKNOWN	CLAYSTONE																													47
AD691		USGS		Geochemistry of rock samples from the National Geochemical Database: U.S. Geological Survey, Reston, VA.	U.S. Geological Survey	USGS		18.1108	-67.1633	0.01				COL	SEDIMENTARY	UNKNOWN	UNKNOWN	CLAYSTONE																														10
AD679		USGS		Geochemistry of rock samples from the National Geochemical Database: U.S. Geological Survey, Reston, VA.	U.S. Geological Survey	USGS		18.0792	-67.1292	0.01				ES	SEDIMENTARY	UNKNOWN	UNKNOWN	CLAYSTONE																							7	1500	70	30	150
AD691		USGS		Geochemistry of rock samples from the National Geochemical Database: U.S. Geological Survey, Reston, VA.	U.S. Geological Survey	USGS		18.1108	-67.1633	0.01				AAS	SEDIMENTARY	UNKNOWN	UNKNOWN	CLAYSTONE																													16
AD691		USGS		Geochemistry of rock samples from the National Geochemical Database: U.S. Geological Survey, Reston, VA.	U.S. Geological Survey	USGS		18.1108	-67.1633	0.01				ES	SEDIMENTARY	UNKNOWN	UNKNOWN	CLAYSTONE																							3	100	20		50
AD700		USGS		Geochemistry of rock samples from the National Geochemical Database: U.S. Geological Survey, Reston, VA.	U.S. Geological Survey	USGS		18.1042	-67.1575	0.01				AAS	SEDIMENTARY	UNKNOWN	UNKNOWN	CLAYSTONE																													19
AD700		USGS		Geochemistry of rock samples from the National Geochemical Database: U.S. Geological Survey, Reston, VA.	U.S. Geological Survey	USGS		18.1042	-67.1575	0.01				ES	SEDIMENTARY	UNKNOWN	UNKNOWN	CLAYSTONE																							1.5	700	10	5	30
AD729		USGS		Geochemistry of rock samples from the National Geochemical Database: U.S. Geological Survey, Reston, VA.	U.S. Geological Survey	USGS		18.0383	-67.1692	0.01				AAS	SEDIMENTARY	UNKNOWN	UNKNOWN	CLAYSTONE																													31
AD729		USGS		Geochemistry of rock samples from the National Geochemical Database: U.S. Geological Survey, Reston, VA.	U.S. Geological Survey	USGS		18.0383	-67.1692	0.01				ES	SEDIMENTARY	UNKNOWN	UNKNOWN	CLAYSTONE																							2	150	5	20	70
AD741		USGS		Geochemistry of rock samples from the National Geochemical Database: U.S. Geological Survey, Reston, VA.	U.S. Geological Survey	USGS		18.0517	-67.1339	0.01				AAS	SEDIMENTARY	UNKNOWN	UNKNOWN	CLAYSTONE																													12
AD741		USGS		Geochemistry of rock samples from the National Geochemical Database: U.S. Geological Survey, Reston, VA.	U.S. Geological Survey	USGS		18.0517	-67.1339	0.01				ES	SEDIMENTARY	UNKNOWN	UNKNOWN	CLAYSTONE																							1	700			30
AD833		USGS		Geochemistry of rock samples from the National Geochemical Database: U.S. Geological Survey, Reston, VA.	U.S. Geological Survey	USGS		17.9814	-67.0442	0.01				AAS	SEDIMENTARY	UNKNOWN	UNKNOWN	CLAYSTONE																													34
AD833		USGS		Geochemistry of rock samples from the National Geochemical Database: U.S. Geological Survey, Reston, VA.	U.S. Geological Survey	USGS		17.9814	-67.0442	0.01				ES	SEDIMENTARY	UNKNOWN	UNKNOWN	CLAYSTONE																							5	1500	50	10	70
AD857		USGS		Geochemistry of rock samples from the National Geochemical Database: U.S. Geological Survey, Reston, VA.	U.S. Geological Survey	USGS		17.9842	-67.0133	0.01				AAS	SEDIMENTARY	UNKNOWN	UNKNOWN	CLAYSTONE																													89
AD857		USGS		Geochemistry of rock samples from the National Geochemical Database: U.S. Geological Survey, Reston, VA.	U.S. Geological Survey	USGS		17.9842	-67.0133	0.01				ES	SEDIMENTARY	UNKNOWN	UNKNOWN	CLAYSTONE																							10	300	150	50	150
AD862		USGS		Geochemistry of rock samples from the National Geochemical Database: U.S. Geological Survey, Reston, VA.	U.S. Geological Survey	USGS		17.9711	-67.0108	0.01				AAS	SEDIMENTARY	UNKNOWN	UNKNOWN	CLAYSTONE																													70
AD862		USGS		Geochemistry of rock samples from the National Geochemical Database: U.S. Geological Survey, Reston, VA.	U.S. Geological Survey	USGS		17.9711	-67.0108	0.01				ES	SEDIMENTARY	UNKNOWN	UNKNOWN	CLAYSTONE																							5	500	10	10	30
AD863		USGS		Geochemistry of rock samples from the National Geochemical Database: U.S. Geological Survey, Reston, VA.	U.S. Geological Survey	USGS		17.9711	-67.0108	0.01				AAS	SEDIMENTARY	UNKNOWN	UNKNOWN	CLAYSTONE																													94
AD863		USGS		Geochemistry of rock samples from the National Geochemical Database: U.S. Geological Survey, Reston, VA.	U.S. Geological Survey	USGS		17.9711	-67.0108	0.01				ES	SEDIMENTARY	UNKNOWN	UNKNOWN	CLAYSTONE																							3	2000	10	10	700
AD876		USGS		Geochemistry of rock samples from the National Geochemical Database: U.S. Geological Survey, Reston, VA.	U.S. Geological Survey	USGS		17.9911	-67.0189	0.01				AAS	SEDIMENTARY	UNKNOWN	UNKNOWN	CLAYSTONE																													45
AD876		USGS		Geochemistry of rock samples from the National Geochemical Database: U.S. Geological Survey, Reston, VA.	U.S. Geological Survey	USGS		17.9911	-67.0189	0.01				ES	SEDIMENTARY	UNKNOWN	UNKNOWN	CLAYSTONE																							1.5	3000			10
AE803		USGS		Geochemistry of rock samples from the National Geochemical Database: U.S. Geological Survey, Reston, VA.	U.S. Geological Survey	USGS		18.0814	-67.0508	0.01				AAS	SEDIMENTARY	UNKNOWN	UNKNOWN	CLAYSTONE																													5
AE803		USGS		Geochemistry of rock samples from the National Geochemical Database: U.S. Geological Survey, Reston, VA.	U.S. Geological Survey	USGS		18.0814	-67.0508	0.01				ES	SEDIMENTARY	UNKNOWN	UNKNOWN	CLAYSTONE																							1	30	30
AE819		USGS		Geochemistry of rock samples from the National Geochemical Database: U.S. Geological Survey, Reston, VA.	U.S. Geological Survey	USGS		18.0042	-67.1025	0.01				AAS	SEDIMENTARY	UNKNOWN	UNKNOWN	CLAYSTONE																													24
AE819		USGS		Geochemistry of rock samples from the National Geochemical Database: U.S. Geological Survey, Reston, VA.	U.S. Geological Survey	USGS		18.0042	-67.1025	0.01				ES	SEDIMENTARY	UNKNOWN	UNKNOWN	CLAYSTONE																							3	150	70	10	10
AE821		USGS		Geochemistry of rock samples from the National Geochemical Database: U.S. Geological Survey, Reston, VA.	U.S. Geological Survey	USGS		18.0025	-67.0692	0.01				AAS	SEDIMENTARY	UNKNOWN	UNKNOWN	CLAYSTONE																													16
AE821		USGS		Geochemistry of rock samples from the National Geochemical Database: U.S. Geological Survey, Reston, VA.	U.S. Geological Survey	USGS		18.0025	-67.0692	0.01				COL	SEDIMENTARY	UNKNOWN	UNKNOWN	CLAYSTONE																														20
AE821		USGS		Geochemistry of rock samples from the National Geochemical Database: U.S. Geological Survey, Reston, VA.	U.S. Geological Survey	USGS		18.0025	-67.0692	0.01				ES	SEDIMENTARY	UNKNOWN	UNKNOWN	CLAYSTONE																							1.5	100	20	5	100
AE971		USGS		Geochemistry of rock samples from the National Geochemical Database: U.S. Geological Survey, Reston, VA.	U.S. Geological Survey	USGS		18.1239	-67.1433	0.01				AAS	SEDIMENTARY	UNKNOWN	UNKNOWN	CLAYSTONE																											32		3
AE971		USGS		Geochemistry of rock samples from the National Geochemical Database: U.S. Geological Survey, Reston, VA.	U.S. Geological Survey	USGS		18.1239	-67.1433	0.01				COL	SEDIMENTARY	UNKNOWN	UNKNOWN	CLAYSTONE																														10
AE971		USGS		Geochemistry of rock samples from the National Geochemical Database: U.S. Geological Survey, Reston, VA.	U.S. Geological Survey	USGS		18.1239	-67.1433	0.01				ES	SEDIMENTARY	UNKNOWN	UNKNOWN	CLAYSTONE																							3	30			10
AE975		USGS		Geochemistry of rock samples from the National Geochemical Database: U.S. Geological Survey, Reston, VA.	U.S. Geological Survey	USGS		18.1239	-67.1433	0.01				AAS	SEDIMENTARY	UNKNOWN	UNKNOWN	CLAYSTONE																											1		2
AE975		USGS		Geochemistry of rock samples from the National Geochemical Database: U.S. Geological Survey, Reston, VA.	U.S. Geological Survey	USGS		18.1239	-67.1433	0.01				COL	SEDIMENTARY	UNKNOWN	UNKNOWN	CLAYSTONE																														10
AE975		USGS		Geochemistry of rock samples from the National Geochemical Database: U.S. Geological Survey, Reston, VA.	U.S. Geological Survey	USGS		18.1239	-67.1433	0.01				ES	SEDIMENTARY	UNKNOWN	UNKNOWN	CLAYSTONE																							1	50	10		20
AE995		USGS		Geochemistry of rock samples from the National Geochemical Database: U.S. Geological Survey, Reston, VA.	U.S. Geological Survey	USGS		17.9472	-66.9294	0.01				AAS	SEDIMENTARY	UNKNOWN	UNKNOWN	CLAYSTONE																											10		97
AE995		USGS		Geochemistry of rock samples from the National Geochemical Database: U.S. Geological Survey, Reston, VA.	U.S. Geological Survey	USGS		17.9472	-66.9294	0.01				COL	SEDIMENTARY	UNKNOWN	UNKNOWN	CLAYSTONE																														20
AE995		USGS		Geochemistry of rock samples from the National Geochemical Database: U.S. Geological Survey, Reston, VA.	U.S. Geological Survey	USGS		17.9472	-66.9294	0.01				ES	SEDIMENTARY	UNKNOWN	UNKNOWN	CLAYSTONE																							1	150	7		10
AF015		USGS		Geochemistry of rock samples from the National Geochemical Database: U.S. Geological Survey, Reston, VA.	U.S. Geological Survey	USGS		18.0436	-66.9383	0.01				AAS	SEDIMENTARY	UNKNOWN	UNKNOWN	CLAYSTONE																													53
AF015		USGS		Geochemistry of rock samples from the National Geochemical Database: U.S. Geological Survey, Reston, VA.	U.S. Geological Survey	USGS		18.0436	-66.9383	0.01				ES	SEDIMENTARY	UNKNOWN	UNKNOWN	CLAYSTONE																							1	300	10	5	20
AF033		USGS		Geochemistry of rock samples from the National Geochemical Database: U.S. Geological Survey, Reston, VA.	U.S. Geological Survey	USGS		18.0467	-66.9222	0.01				AAS	SEDIMENTARY	UNKNOWN	UNKNOWN	CLAYSTONE																													54
AF033		USGS		Geochemistry of rock samples from the National Geochemical Database: U.S. Geological Survey, Reston, VA.	U.S. Geological Survey	USGS		18.0467	-66.9222	0.01				ES	SEDIMENTARY	UNKNOWN	UNKNOWN	CLAYSTONE																							1.5	300	15	10	70
AF040		USGS		Geochemistry of rock samples from the National Geochemical Database: U.S. Geological Survey, Reston, VA.	U.S. Geological Survey	USGS		18.0472	-66.9089	0.01				AAS	SEDIMENTARY	UNKNOWN	UNKNOWN	CLAYSTONE																													59
AF040		USGS		Geochemistry of rock samples from the National Geochemical Database: U.S. Geological Survey, Reston, VA.	U.S. Geological Survey	USGS		18.0472	-66.9089	0.01				ES	SEDIMENTARY	UNKNOWN	UNKNOWN	CLAYSTONE																							2	700	150	10	70
AF048		USGS		Geochemistry of rock samples from the National Geochemical Database: U.S. Geological Survey, Reston, VA.	U.S. Geological Survey	USGS		18.0931	-66.9528	0.01				AAS	SEDIMENTARY	UNKNOWN	UNKNOWN	CLAYSTONE																													6
AF048		USGS		Geochemistry of rock samples from the National Geochemical Database: U.S. Geological Survey, Reston, VA.	U.S. Geological Survey	USGS		18.0931	-66.9528	0.01				COL	SEDIMENTARY	UNKNOWN	UNKNOWN	CLAYSTONE																														10
AF048		USGS		Geochemistry of rock samples from the National Geochemical Database: U.S. Geological Survey, Reston, VA.	U.S. Geological Survey	USGS		18.0931	-66.9528	0.01				ES	SEDIMENTARY	UNKNOWN	UNKNOWN	CLAYSTONE																							5	100	10		20
AF064		USGS		Geochemistry of rock samples from the National Geochemical Database: U.S. Geological Survey, Reston, VA.	U.S. Geological Survey	USGS		18.1	-66.9389	0.01				AAS	SEDIMENTARY	UNKNOWN	UNKNOWN	CLAYSTONE																													76
AF064		USGS		Geochemistry of rock samples from the National Geochemical Database: U.S. Geological Survey, Reston, VA.	U.S. Geological Survey	USGS		18.1	-66.9389	0.01				ES	SEDIMENTARY	UNKNOWN	UNKNOWN	CLAYSTONE																							7	1500	150	30	150
AF070		USGS		Geochemistry of rock samples from the National Geochemical Database: U.S. Geological Survey, Reston, VA.	U.S. Geological Survey	USGS		18.1208	-66.9361	0.01				AAS	SEDIMENTARY	UNKNOWN	UNKNOWN	CLAYSTONE																													82
AF070		USGS		Geochemistry of rock samples from the National Geochemical Database: U.S. Geological Survey, Reston, VA.	U.S. Geological Survey	USGS		18.1208	-66.9361	0.01				ES	SEDIMENTARY	UNKNOWN	UNKNOWN	CLAYSTONE																							3	1500	200	10	100
AF073		USGS		Geochemistry of rock samples from the National Geochemical Database: U.S. Geological Survey, Reston, VA.	U.S. Geological Survey	USGS		18.1217	-66.9342	0.01				AAS	SEDIMENTARY	UNKNOWN	UNKNOWN	CLAYSTONE																													15
AF073		USGS		Geochemistry of rock samples from the National Geochemical Database: U.S. Geological Survey, Reston, VA.	U.S. Geological Survey	USGS		18.1217	-66.9342	0.01				ES	SEDIMENTARY	UNKNOWN	UNKNOWN	CLAYSTONE																							2	200	200	5	5
AF075		USGS		Geochemistry of rock samples from the National Geochemical Database: U.S. Geological Survey, Reston, VA.	U.S. Geological Survey	USGS		18.1039	-66.9333	0.01				AAS	SEDIMENTARY	UNKNOWN	UNKNOWN	CLAYSTONE																													15
AF075		USGS		Geochemistry of rock samples from the National Geochemical Database: U.S. Geological Survey, Reston, VA.	U.S. Geological Survey	USGS		18.1039	-66.9333	0.01				ES	SEDIMENTARY	UNKNOWN	UNKNOWN	CLAYSTONE																							2	30	150	5	10
AF086		USGS		Geochemistry of rock samples from the National Geochemical Database: U.S. Geological Survey, Reston, VA.	U.S. Geological Survey	USGS		18.0719	-66.9108	0.01				AAS	SEDIMENTARY	UNKNOWN	UNKNOWN	CLAYSTONE																													47
AF086		USGS		Geochemistry of rock samples from the National Geochemical Database: U.S. Geological Survey, Reston, VA.	U.S. Geological Survey	USGS		18.0719	-66.9108	0.01				ES	SEDIMENTARY	UNKNOWN	UNKNOWN	CLAYSTONE																							7	1500	300	20	100
AF094		USGS		Geochemistry of rock samples from the National Geochemical Database: U.S. Geological Survey, Reston, VA.	U.S. Geological Survey	USGS		18.0722	-66.9436	0.01				AAS	SEDIMENTARY	UNKNOWN	UNKNOWN	CLAYSTONE																													39
AF094		USGS		Geochemistry of rock samples from the National Geochemical Database: U.S. Geological Survey, Reston, VA.	U.S. Geological Survey	USGS		18.0722	-66.9436	0.01				ES	SEDIMENTARY	UNKNOWN	UNKNOWN	CLAYSTONE																							5	700	200	30	100
AF101		USGS		Geochemistry of rock samples from the National Geochemical Database: U.S. Geological Survey, Reston, VA.	U.S. Geological Survey	USGS		18.0786	-66.93	0.01				AAS	SEDIMENTARY	UNKNOWN	UNKNOWN	CLAYSTONE																													50
AF101		USGS		Geochemistry of rock samples from the National Geochemical Database: U.S. Geological Survey, Reston, VA.	U.S. Geological Survey	USGS		18.0786	-66.93	0.01				ES	SEDIMENTARY	UNKNOWN	UNKNOWN	CLAYSTONE																							3	300	200	15	150
AF107		USGS		Geochemistry of rock samples from the National Geochemical Database: U.S. Geological Survey, Reston, VA.	U.S. Geological Survey	USGS		18.0931	-66.9408	0.01				AAS	SEDIMENTARY	UNKNOWN	UNKNOWN	CLAYSTONE																													82
AF107		USGS		Geochemistry of rock samples from the National Geochemical Database: U.S. Geological Survey, Reston, VA.	U.S. Geological Survey	USGS		18.0931	-66.9408	0.01				ES	SEDIMENTARY	UNKNOWN	UNKNOWN	CLAYSTONE																							7	700	70	15	150
AF114		USGS		Geochemistry of rock samples from the National Geochemical Database: U.S. Geological Survey, Reston, VA.	U.S. Geological Survey	USGS		18.1078	-66.9347	0.01				AAS	SEDIMENTARY	UNKNOWN	UNKNOWN	CLAYSTONE																													43
AF114		USGS		Geochemistry of rock samples from the National Geochemical Database: U.S. Geological Survey, Reston, VA.	U.S. Geological Survey	USGS		18.1078	-66.9347	0.01				ES	SEDIMENTARY	UNKNOWN	UNKNOWN	CLAYSTONE																							7	300	700	30	150
AF120		USGS		Geochemistry of rock samples from the National Geochemical Database: U.S. Geological Survey, Reston, VA.	U.S. Geological Survey	USGS		18.1042	-66.9714	0.01				AAS	SEDIMENTARY	UNKNOWN	UNKNOWN	CLAYSTONE																													23
AF120		USGS		Geochemistry of rock samples from the National Geochemical Database: U.S. Geological Survey, Reston, VA.	U.S. Geological Survey	USGS		18.1042	-66.9714	0.01				ES	SEDIMENTARY	UNKNOWN	UNKNOWN	CLAYSTONE																							7	300	3000	150	10
AF134		USGS		Geochemistry of rock samples from the National Geochemical Database: U.S. Geological Survey, Reston, VA.	U.S. Geological Survey	USGS		18.105	-66.9989	0.01				AAS	SEDIMENTARY	UNKNOWN	UNKNOWN	CLAYSTONE																													60
AF134		USGS		Geochemistry of rock samples from the National Geochemical Database: U.S. Geological Survey, Reston, VA.	U.S. Geological Survey	USGS		18.105	-66.9989	0.01				ES	SEDIMENTARY	UNKNOWN	UNKNOWN	CLAYSTONE																							5	1000	70	10	100				0.7
AF163		USGS		Geochemistry of rock samples from the National Geochemical Database: U.S. Geological Survey, Reston, VA.	U.S. Geological Survey	USGS		18.0539	-66.8797	0.01				AAS	SEDIMENTARY	UNKNOWN	UNKNOWN	CLAYSTONE																													50
AF163		USGS		Geochemistry of rock samples from the National Geochemical Database: U.S. Geological Survey, Reston, VA.	U.S. Geological Survey	USGS		18.0539	-66.8797	0.01				ES	SEDIMENTARY	UNKNOWN	UNKNOWN	CLAYSTONE																							3	1000	20	15	150				0.5
AF180		USGS		Geochemistry of rock samples from the National Geochemical Database: U.S. Geological Survey, Reston, VA.	U.S. Geological Survey	USGS		18.0589	-66.8897	0.01				AAS	SEDIMENTARY	UNKNOWN	UNKNOWN	CLAYSTONE																													32
AF180		USGS		Geochemistry of rock samples from the National Geochemical Database: U.S. Geological Survey, Reston, VA.	U.S. Geological Survey	USGS		18.0589	-66.8897	0.01				ES	SEDIMENTARY	UNKNOWN	UNKNOWN	CLAYSTONE																							7	1500	3000	150
AF499		USGS		Geochemistry of rock samples from the National Geochemical Database: U.S. Geological Survey, Reston, VA.	U.S. Geological Survey	USGS		18.0967	-67.0139	0.01				AAS	SEDIMENTARY	UNKNOWN	UNKNOWN	CLAYSTONE																													38
AF499		USGS		Geochemistry of rock samples from the National Geochemical Database: U.S. Geological Survey, Reston, VA.	U.S. Geological Survey	USGS		18.0967	-67.0139	0.01				ES	SEDIMENTARY	UNKNOWN	UNKNOWN	CLAYSTONE																							2	1500	20	15	70
AF509		USGS		Geochemistry of rock samples from the National Geochemical Database: U.S. Geological Survey, Reston, VA.	U.S. Geological Survey	USGS		18.1033	-67.0083	0.01				AAS	SEDIMENTARY	UNKNOWN	UNKNOWN	CLAYSTONE																													41
AF509		USGS		Geochemistry of rock samples from the National Geochemical Database: U.S. Geological Survey, Reston, VA.	U.S. Geological Survey	USGS		18.1033	-67.0083	0.01				ES	SEDIMENTARY	UNKNOWN	UNKNOWN	CLAYSTONE																							3	2000	30	7	50
AF516		USGS		Geochemistry of rock samples from the National Geochemical Database: U.S. Geological Survey, Reston, VA.	U.S. Geological Survey	USGS		18.1147	-67.0036	0.01				AAS	SEDIMENTARY	UNKNOWN	UNKNOWN	CLAYSTONE																													74
AF516		USGS		Geochemistry of rock samples from the National Geochemical Database: U.S. Geological Survey, Reston, VA.	U.S. Geological Survey	USGS		18.1147	-67.0036	0.01				ES	SEDIMENTARY	UNKNOWN	UNKNOWN	CLAYSTONE																							1.5	150	30	5	50
AF519		USGS		Geochemistry of rock samples from the National Geochemical Database: U.S. Geological Survey, Reston, VA.	U.S. Geological Survey	USGS		18.1183	-67.0031	0.01				AAS	SEDIMENTARY	UNKNOWN	UNKNOWN	CLAYSTONE																													48
AF519		USGS		Geochemistry of rock samples from the National Geochemical Database: U.S. Geological Survey, Reston, VA.	U.S. Geological Survey	USGS		18.1183	-67.0031	0.01				ES	SEDIMENTARY	UNKNOWN	UNKNOWN	CLAYSTONE																							1.5	300	10	5	50
AF523		USGS		Geochemistry of rock samples from the National Geochemical Database: U.S. Geological Survey, Reston, VA.	U.S. Geological Survey	USGS		18.1183	-67.0031	0.01				AAS	SEDIMENTARY	UNKNOWN	UNKNOWN	CLAYSTONE																													43
AF523		USGS		Geochemistry of rock samples from the National Geochemical Database: U.S. Geological Survey, Reston, VA.	U.S. Geological Survey	USGS		18.1183	-67.0031	0.01				COL	SEDIMENTARY	UNKNOWN	UNKNOWN	CLAYSTONE																														10
AF523		USGS		Geochemistry of rock samples from the National Geochemical Database: U.S. Geological Survey, Reston, VA.	U.S. Geological Survey	USGS		18.1183	-67.0031	0.01				ES	SEDIMENTARY	UNKNOWN	UNKNOWN	CLAYSTONE																							0.7	1500	7	5	10
AF556		USGS		Geochemistry of rock samples from the National Geochemical Database: U.S. Geological Survey, Reston, VA.	U.S. Geological Survey	USGS		18.1011	-67.0319	0.01				AAS	SEDIMENTARY	UNKNOWN	UNKNOWN	CLAYSTONE																													20
AF556		USGS		Geochemistry of rock samples from the National Geochemical Database: U.S. Geological Survey, Reston, VA.	U.S. Geological Survey	USGS		18.1011	-67.0319	0.01				COL	SEDIMENTARY	UNKNOWN	UNKNOWN	CLAYSTONE																														10
AF556		USGS		Geochemistry of rock samples from the National Geochemical Database: U.S. Geological Survey, Reston, VA.	U.S. Geological Survey	USGS		18.1011	-67.0319	0.01				ES	SEDIMENTARY	UNKNOWN	UNKNOWN	CLAYSTONE																							3	300	70	5	70
AF568		USGS		Geochemistry of rock samples from the National Geochemical Database: U.S. Geological Survey, Reston, VA.	U.S. Geological Survey	USGS		18.1206	-67.0628	0.01				AAS	SEDIMENTARY	UNKNOWN	UNKNOWN	CLAYSTONE																													3
AF568		USGS		Geochemistry of rock samples from the National Geochemical Database: U.S. Geological Survey, Reston, VA.	U.S. Geological Survey	USGS		18.1206	-67.0628	0.01				COL	SEDIMENTARY	UNKNOWN	UNKNOWN	CLAYSTONE																														140
AF568		USGS		Geochemistry of rock samples from the National Geochemical Database: U.S. Geological Survey, Reston, VA.	U.S. Geological Survey	USGS		18.1206	-67.0628	0.01				ES	SEDIMENTARY	UNKNOWN	UNKNOWN	CLAYSTONE
AF577		USGS		Geochemistry of rock samples from the National Geochemical Database: U.S. Geological Survey, Reston, VA.	U.S. Geological Survey	USGS		18.1222	-67.0764	0.01				AAS	SEDIMENTARY	UNKNOWN	UNKNOWN	CLAYSTONE																													28
AF577		USGS		Geochemistry of rock samples from the National Geochemical Database: U.S. Geological Survey, Reston, VA.	U.S. Geological Survey	USGS		18.1222	-67.0764	0.01				COL	SEDIMENTARY	UNKNOWN	UNKNOWN	CLAYSTONE																														20
AF577		USGS		Geochemistry of rock samples from the National Geochemical Database: U.S. Geological Survey, Reston, VA.	U.S. Geological Survey	USGS		18.1222	-67.0764	0.01				ES	SEDIMENTARY	UNKNOWN	UNKNOWN	CLAYSTONE																							2	200	70	10	70
AF597		USGS		Geochemistry of rock samples from the National Geochemical Database: U.S. Geological Survey, Reston, VA.	U.S. Geological Survey	USGS		18.1144	-67.0483	0.01				AAS	SEDIMENTARY	UNKNOWN	UNKNOWN	CLAYSTONE																													84
AF597		USGS		Geochemistry of rock samples from the National Geochemical Database: U.S. Geological Survey, Reston, VA.	U.S. Geological Survey	USGS		18.1144	-67.0483	0.01				COL	SEDIMENTARY	UNKNOWN	UNKNOWN	CLAYSTONE																														30
AF597		USGS		Geochemistry of rock samples from the National Geochemical Database: U.S. Geological Survey, Reston, VA.	U.S. Geological Survey	USGS		18.1144	-67.0483	0.01				ES	SEDIMENTARY	UNKNOWN	UNKNOWN	CLAYSTONE																							3	700	50	15	100				1.5
AF602		USGS		Geochemistry of rock samples from the National Geochemical Database: U.S. Geological Survey, Reston, VA.	U.S. Geological Survey	USGS		18.1119	-67.0517	0.01				AAS	SEDIMENTARY	UNKNOWN	UNKNOWN	CLAYSTONE																													46
AF602		USGS		Geochemistry of rock samples from the National Geochemical Database: U.S. Geological Survey, Reston, VA.	U.S. Geological Survey	USGS		18.1119	-67.0517	0.01				ES	SEDIMENTARY	UNKNOWN	UNKNOWN	CLAYSTONE																							5	700	10	15	100
AF635		USGS		Geochemistry of rock samples from the National Geochemical Database: U.S. Geological Survey, Reston, VA.	U.S. Geological Survey	USGS		18.1056	-67.0208	0.01				AAS	SEDIMENTARY	UNKNOWN	UNKNOWN	CLAYSTONE																													54
AF635		USGS		Geochemistry of rock samples from the National Geochemical Database: U.S. Geological Survey, Reston, VA.	U.S. Geological Survey	USGS		18.1056	-67.0208	0.01				ES	SEDIMENTARY	UNKNOWN	UNKNOWN	CLAYSTONE																							5	1500	30	15	100
AF650		USGS		Geochemistry of rock samples from the National Geochemical Database: U.S. Geological Survey, Reston, VA.	U.S. Geological Survey	USGS		18.0883	-67.0053	0.01				AAS	SEDIMENTARY	UNKNOWN	UNKNOWN	CLAYSTONE																													73
AF650		USGS		Geochemistry of rock samples from the National Geochemical Database: U.S. Geological Survey, Reston, VA.	U.S. Geological Survey	USGS		18.0883	-67.0053	0.01				ES	SEDIMENTARY	UNKNOWN	UNKNOWN	CLAYSTONE																							3	300	30	10	70
AF679		USGS		Geochemistry of rock samples from the National Geochemical Database: U.S. Geological Survey, Reston, VA.	U.S. Geological Survey	USGS		18.0722	-66.8875	0.01				AAS	SEDIMENTARY	UNKNOWN	UNKNOWN	CLAYSTONE																													32
AF679		USGS		Geochemistry of rock samples from the National Geochemical Database: U.S. Geological Survey, Reston, VA.	U.S. Geological Survey	USGS		18.0722	-66.8875	0.01				ES	SEDIMENTARY	UNKNOWN	UNKNOWN	CLAYSTONE																							7	1500	5000	200	5
AF682		USGS		Geochemistry of rock samples from the National Geochemical Database: U.S. Geological Survey, Reston, VA.	U.S. Geological Survey	USGS		18.095	-66.8792	0.01				AAS	SEDIMENTARY	UNKNOWN	UNKNOWN	CLAYSTONE																													39
AF682		USGS		Geochemistry of rock samples from the National Geochemical Database: U.S. Geological Survey, Reston, VA.	U.S. Geological Survey	USGS		18.095	-66.8792	0.01				ES	SEDIMENTARY	UNKNOWN	UNKNOWN	CLAYSTONE																							2	1500	10	10	50
AF687		USGS		Geochemistry of rock samples from the National Geochemical Database: U.S. Geological Survey, Reston, VA.	U.S. Geological Survey	USGS		18.0917	-66.8797	0.01				AAS	SEDIMENTARY	UNKNOWN	UNKNOWN	CLAYSTONE																													30
AF687		USGS		Geochemistry of rock samples from the National Geochemical Database: U.S. Geological Survey, Reston, VA.	U.S. Geological Survey	USGS		18.0917	-66.8797	0.01				ES	SEDIMENTARY	UNKNOWN	UNKNOWN	CLAYSTONE																							1.5	700	10	20	70
AF693		USGS		Geochemistry of rock samples from the National Geochemical Database: U.S. Geological Survey, Reston, VA.	U.S. Geological Survey	USGS		18.1181	-66.8886	0.01				AAS	SEDIMENTARY	UNKNOWN	UNKNOWN	CLAYSTONE																													52
AF693		USGS		Geochemistry of rock samples from the National Geochemical Database: U.S. Geological Survey, Reston, VA.	U.S. Geological Survey	USGS		18.1181	-66.8886	0.01				ES	SEDIMENTARY	UNKNOWN	UNKNOWN	CLAYSTONE																							3	700	20	5	100				0.5
AF702		USGS		Geochemistry of rock samples from the National Geochemical Database: U.S. Geological Survey, Reston, VA.	U.S. Geological Survey	USGS		18.1172	-66.8769	0.01				AAS	SEDIMENTARY	UNKNOWN	UNKNOWN	CLAYSTONE																													50
AF702		USGS		Geochemistry of rock samples from the National Geochemical Database: U.S. Geological Survey, Reston, VA.	U.S. Geological Survey	USGS		18.1172	-66.8769	0.01				ES	SEDIMENTARY	UNKNOWN	UNKNOWN	CLAYSTONE																							3	1500	30	10	100
AF705		USGS		Geochemistry of rock samples from the National Geochemical Database: U.S. Geological Survey, Reston, VA.	U.S. Geological Survey	USGS		18.1194	-66.8767	0.01				AAS	SEDIMENTARY	UNKNOWN	UNKNOWN	CLAYSTONE																													36
AF705		USGS		Geochemistry of rock samples from the National Geochemical Database: U.S. Geological Survey, Reston, VA.	U.S. Geological Survey	USGS		18.1194	-66.8767	0.01				ES	SEDIMENTARY	UNKNOWN	UNKNOWN	CLAYSTONE																							7	1500	100	30	150
AF713		USGS		Geochemistry of rock samples from the National Geochemical Database: U.S. Geological Survey, Reston, VA.	U.S. Geological Survey	USGS		18.105	-66.8958	0.01				AAS	SEDIMENTARY	UNKNOWN	UNKNOWN	CLAYSTONE																													19
AF713		USGS		Geochemistry of rock samples from the National Geochemical Database: U.S. Geological Survey, Reston, VA.	U.S. Geological Survey	USGS		18.105	-66.8958	0.01				ES	SEDIMENTARY	UNKNOWN	UNKNOWN	CLAYSTONE																							5	300	30	10	70
AF723		USGS		Geochemistry of rock samples from the National Geochemical Database: U.S. Geological Survey, Reston, VA.	U.S. Geological Survey	USGS		18.1153	-66.9033	0.01				AAS	SEDIMENTARY	UNKNOWN	UNKNOWN	CLAYSTONE																													13
AF723		USGS		Geochemistry of rock samples from the National Geochemical Database: U.S. Geological Survey, Reston, VA.	U.S. Geological Survey	USGS		18.1153	-66.9033	0.01				ES	SEDIMENTARY	UNKNOWN	UNKNOWN	CLAYSTONE																							0.7	300	30	5	100
AF733		USGS		Geochemistry of rock samples from the National Geochemical Database: U.S. Geological Survey, Reston, VA.	U.S. Geological Survey	USGS		18.1106	-66.9164	0.01				AAS	SEDIMENTARY	UNKNOWN	UNKNOWN	CLAYSTONE																													14
AF733		USGS		Geochemistry of rock samples from the National Geochemical Database: U.S. Geological Survey, Reston, VA.	U.S. Geological Survey	USGS		18.1106	-66.9164	0.01				ES	SEDIMENTARY	UNKNOWN	UNKNOWN	CLAYSTONE																							3	300	70	10	150
AKF022		USGS		Geochemistry of rock samples from the National Geochemical Database: U.S. Geological Survey, Reston, VA.	U.S. Geological Survey	USGS		40.93	-117.416	0.01				AAS	SEDIMENTARY	UNKNOWN	UNKNOWN	CLAYSTONE																											20		70		0.2
AKF022		USGS		Geochemistry of rock samples from the National Geochemical Database: U.S. Geological Survey, Reston, VA.	U.S. Geological Survey	USGS		40.93	-117.416	0.01				COL	SEDIMENTARY	UNKNOWN	UNKNOWN	CLAYSTONE
AKF022		USGS		Geochemistry of rock samples from the National Geochemical Database: U.S. Geological Survey, Reston, VA.	U.S. Geological Survey	USGS		40.93	-117.416	0.01				ES	SEDIMENTARY	UNKNOWN	UNKNOWN	CLAYSTONE																							7	700	20	20	50
AKF031		USGS		Geochemistry of rock samples from the National Geochemical Database: U.S. Geological Survey, Reston, VA.	U.S. Geological Survey	USGS		40.9306	-117.411	0.01				AAS	SEDIMENTARY	UNKNOWN	UNKNOWN	CLAYSTONE																													64		0.5
AKF031		USGS		Geochemistry of rock samples from the National Geochemical Database: U.S. Geological Survey, Reston, VA.	U.S. Geological Survey	USGS		40.9306	-117.411	0.01				COL	SEDIMENTARY	UNKNOWN	UNKNOWN	CLAYSTONE																														20
AKF031		USGS		Geochemistry of rock samples from the National Geochemical Database: U.S. Geological Survey, Reston, VA.	U.S. Geological Survey	USGS		40.9306	-117.411	0.01				ES	SEDIMENTARY	UNKNOWN	UNKNOWN	CLAYSTONE																							10	3000	20	30	70
AKF035		USGS		Geochemistry of rock samples from the National Geochemical Database: U.S. Geological Survey, Reston, VA.	U.S. Geological Survey	USGS		40.9264	-117.404	0.01				AAS	SEDIMENTARY	UNKNOWN	UNKNOWN	CLAYSTONE																											140		100		1
AKF035		USGS		Geochemistry of rock samples from the National Geochemical Database: U.S. Geological Survey, Reston, VA.	U.S. Geological Survey	USGS		40.9264	-117.404	0.01				COL	SEDIMENTARY	UNKNOWN	UNKNOWN	CLAYSTONE																														10
AKF035		USGS		Geochemistry of rock samples from the National Geochemical Database: U.S. Geological Survey, Reston, VA.	U.S. Geological Survey	USGS		40.9264	-117.404	0.01				ES	SEDIMENTARY	UNKNOWN	UNKNOWN	CLAYSTONE																							20	1000	30	10	200		300	200
AKF036		USGS		Geochemistry of rock samples from the National Geochemical Database: U.S. Geological Survey, Reston, VA.	U.S. Geological Survey	USGS		40.9264	-117.404	0.01				AAS	SEDIMENTARY	UNKNOWN	UNKNOWN	CLAYSTONE																											290		32		12
AKF036		USGS		Geochemistry of rock samples from the National Geochemical Database: U.S. Geological Survey, Reston, VA.	U.S. Geological Survey	USGS		40.9264	-117.404	0.01				COL	SEDIMENTARY	UNKNOWN	UNKNOWN	CLAYSTONE																														80
AKF036		USGS		Geochemistry of rock samples from the National Geochemical Database: U.S. Geological Survey, Reston, VA.	U.S. Geological Survey	USGS		40.9264	-117.404	0.01				ES	SEDIMENTARY	UNKNOWN	UNKNOWN	CLAYSTONE																								1500	100	50	1500		1000		20
AKF037		USGS		Geochemistry of rock samples from the National Geochemical Database: U.S. Geological Survey, Reston, VA.	U.S. Geological Survey	USGS		40.9264	-117.404	0.01				AAS	SEDIMENTARY	UNKNOWN	UNKNOWN	CLAYSTONE																											900		46		2.5
AKF037		USGS		Geochemistry of rock samples from the National Geochemical Database: U.S. Geological Survey, Reston, VA.	U.S. Geological Survey	USGS		40.9264	-117.404	0.01				COL	SEDIMENTARY	UNKNOWN	UNKNOWN	CLAYSTONE
AKF037		USGS		Geochemistry of rock samples from the National Geochemical Database: U.S. Geological Survey, Reston, VA.	U.S. Geological Survey	USGS		40.9264	-117.404	0.01				ES	SEDIMENTARY	UNKNOWN	UNKNOWN	CLAYSTONE																							15	300	15	20	1500				5
AKF213		USGS		Geochemistry of rock samples from the National Geochemical Database: U.S. Geological Survey, Reston, VA.	U.S. Geological Survey	USGS		40.9203	-117.337	0.01				AAS	SEDIMENTARY	UNKNOWN	UNKNOWN	CLAYSTONE																											10		35		1.4
AKF213		USGS		Geochemistry of rock samples from the National Geochemical Database: U.S. Geological Survey, Reston, VA.	U.S. Geological Survey	USGS		40.9203	-117.337	0.01				COL	SEDIMENTARY	UNKNOWN	UNKNOWN	CLAYSTONE																														10
AKF213		USGS		Geochemistry of rock samples from the National Geochemical Database: U.S. Geological Survey, Reston, VA.	U.S. Geological Survey	USGS		40.9203	-117.337	0.01				ES	SEDIMENTARY	UNKNOWN	UNKNOWN	CLAYSTONE																							3	1500	20	7	20
AKF303		USGS		Geochemistry of rock samples from the National Geochemical Database: U.S. Geological Survey, Reston, VA.	U.S. Geological Survey	USGS		40.9522	-117.411	0.01				AAS	SEDIMENTARY	UNKNOWN	UNKNOWN	CLAYSTONE																											38		35		1.8
AKF303		USGS		Geochemistry of rock samples from the National Geochemical Database: U.S. Geological Survey, Reston, VA.	U.S. Geological Survey	USGS		40.9522	-117.411	0.01				COL	SEDIMENTARY	UNKNOWN	UNKNOWN	CLAYSTONE																														60
AKF303		USGS		Geochemistry of rock samples from the National Geochemical Database: U.S. Geological Survey, Reston, VA.	U.S. Geological Survey	USGS		40.9522	-117.411	0.01				ES	SEDIMENTARY	UNKNOWN	UNKNOWN	CLAYSTONE																								50	10		30				0.5
AKF316		USGS		Geochemistry of rock samples from the National Geochemical Database: U.S. Geological Survey, Reston, VA.	U.S. Geological Survey	USGS		40.9353	-117.419	0.01				AAS	SEDIMENTARY	UNKNOWN	UNKNOWN	CLAYSTONE																															0.2
AKF316		USGS		Geochemistry of rock samples from the National Geochemical Database: U.S. Geological Survey, Reston, VA.	U.S. Geological Survey	USGS		40.9353	-117.419	0.01				COL	SEDIMENTARY	UNKNOWN	UNKNOWN	CLAYSTONE																														40
AKF316		USGS		Geochemistry of rock samples from the National Geochemical Database: U.S. Geological Survey, Reston, VA.	U.S. Geological Survey	USGS		40.9353	-117.419	0.01				ES	SEDIMENTARY	UNKNOWN	UNKNOWN	CLAYSTONE																							1.5	200	15	5	10
AKF345		USGS		Geochemistry of rock samples from the National Geochemical Database: U.S. Geological Survey, Reston, VA.	U.S. Geological Survey	USGS		40.9461	-117.372	0.01				AAS	SEDIMENTARY	UNKNOWN	UNKNOWN	CLAYSTONE																											74				1.8
AKF345		USGS		Geochemistry of rock samples from the National Geochemical Database: U.S. Geological Survey, Reston, VA.	U.S. Geological Survey	USGS		40.9461	-117.372	0.01				COL	SEDIMENTARY	UNKNOWN	UNKNOWN	CLAYSTONE																														80
AKF345		USGS		Geochemistry of rock samples from the National Geochemical Database: U.S. Geological Survey, Reston, VA.	U.S. Geological Survey	USGS		40.9461	-117.372	0.01				ES	SEDIMENTARY	UNKNOWN	UNKNOWN	CLAYSTONE																							5	700	150	10	30				0.5
AKF578		USGS		Geochemistry of rock samples from the National Geochemical Database: U.S. Geological Survey, Reston, VA.	U.S. Geological Survey	USGS		40.9228	-117.384	0.01				AAS	SEDIMENTARY	UNKNOWN	UNKNOWN	CLAYSTONE																											17		25		1
AKF578		USGS		Geochemistry of rock samples from the National Geochemical Database: U.S. Geological Survey, Reston, VA.	U.S. Geological Survey	USGS		40.9228	-117.384	0.01				COL	SEDIMENTARY	UNKNOWN	UNKNOWN	CLAYSTONE																														80
AKF578		USGS		Geochemistry of rock samples from the National Geochemical Database: U.S. Geological Survey, Reston, VA.	U.S. Geological Survey	USGS		40.9228	-117.384	0.01				ES	SEDIMENTARY	UNKNOWN	UNKNOWN	CLAYSTONE																							3	1500	30	7	15
AKF579		USGS		Geochemistry of rock samples from the National Geochemical Database: U.S. Geological Survey, Reston, VA.	U.S. Geological Survey	USGS		40.9228	-117.384	0.01				AAS	SEDIMENTARY	UNKNOWN	UNKNOWN	CLAYSTONE																											68		50		0.2
AKF579		USGS		Geochemistry of rock samples from the National Geochemical Database: U.S. Geological Survey, Reston, VA.	U.S. Geological Survey	USGS		40.9228	-117.384	0.01				COL	SEDIMENTARY	UNKNOWN	UNKNOWN	CLAYSTONE																														40
AKF579		USGS		Geochemistry of rock samples from the National Geochemical Database: U.S. Geological Survey, Reston, VA.	U.S. Geological Survey	USGS		40.9228	-117.384	0.01				ES	SEDIMENTARY	UNKNOWN	UNKNOWN	CLAYSTONE																							7	1000	50	20	50
AKF580		USGS		Geochemistry of rock samples from the National Geochemical Database: U.S. Geological Survey, Reston, VA.	U.S. Geological Survey	USGS		40.9228	-117.384	0.01				AAS	SEDIMENTARY	UNKNOWN	UNKNOWN	CLAYSTONE																											29		75		0.4
AKF580		USGS		Geochemistry of rock samples from the National Geochemical Database: U.S. Geological Survey, Reston, VA.	U.S. Geological Survey	USGS		40.9228	-117.384	0.01				COL	SEDIMENTARY	UNKNOWN	UNKNOWN	CLAYSTONE																														10
AKF580		USGS		Geochemistry of rock samples from the National Geochemical Database: U.S. Geological Survey, Reston, VA.	U.S. Geological Survey	USGS		40.9228	-117.384	0.01				ES	SEDIMENTARY	UNKNOWN	UNKNOWN	CLAYSTONE																							3	700	30	7	30				0.7
AKF581		USGS		Geochemistry of rock samples from the National Geochemical Database: U.S. Geological Survey, Reston, VA.	U.S. Geological Survey	USGS		40.9228	-117.384	0.01				AAS	SEDIMENTARY	UNKNOWN	UNKNOWN	CLAYSTONE																											160		75		1
AKF581		USGS		Geochemistry of rock samples from the National Geochemical Database: U.S. Geological Survey, Reston, VA.	U.S. Geological Survey	USGS		40.9228	-117.384	0.01				COL	SEDIMENTARY	UNKNOWN	UNKNOWN	CLAYSTONE																														60
AKF581		USGS		Geochemistry of rock samples from the National Geochemical Database: U.S. Geological Survey, Reston, VA.	U.S. Geological Survey	USGS		40.9228	-117.384	0.01				ES	SEDIMENTARY	UNKNOWN	UNKNOWN	CLAYSTONE																							10	1000	30	20	70
AKF583		USGS		Geochemistry of rock samples from the National Geochemical Database: U.S. Geological Survey, Reston, VA.	U.S. Geological Survey	USGS		40.9247	-117.382	0.01				AAS	SEDIMENTARY	UNKNOWN	UNKNOWN	CLAYSTONE																											140		380		8.8
AKF583		USGS		Geochemistry of rock samples from the National Geochemical Database: U.S. Geological Survey, Reston, VA.	U.S. Geological Survey	USGS		40.9247	-117.382	0.01				COL	SEDIMENTARY	UNKNOWN	UNKNOWN	CLAYSTONE																														2000
AKF583		USGS		Geochemistry of rock samples from the National Geochemical Database: U.S. Geological Survey, Reston, VA.	U.S. Geological Survey	USGS		40.9247	-117.382	0.01				ES	SEDIMENTARY	UNKNOWN	UNKNOWN	CLAYSTONE																							10	500	100	20	100		700	1500	5
AKF638		USGS		Geochemistry of rock samples from the National Geochemical Database: U.S. Geological Survey, Reston, VA.	U.S. Geological Survey	USGS		40.9311	-117.38	0.01				AAS	SEDIMENTARY	UNKNOWN	UNKNOWN	CLAYSTONE																											90		170		0.4
AKF638		USGS		Geochemistry of rock samples from the National Geochemical Database: U.S. Geological Survey, Reston, VA.	U.S. Geological Survey	USGS		40.9311	-117.38	0.01				COL	SEDIMENTARY	UNKNOWN	UNKNOWN	CLAYSTONE																														10
AKF638		USGS		Geochemistry of rock samples from the National Geochemical Database: U.S. Geological Survey, Reston, VA.	U.S. Geological Survey	USGS		40.9311	-117.38	0.01				ES	SEDIMENTARY	UNKNOWN	UNKNOWN	CLAYSTONE																							2	150	5	7	50
AKF642		USGS		Geochemistry of rock samples from the National Geochemical Database: U.S. Geological Survey, Reston, VA.	U.S. Geological Survey	USGS		40.9381	-117.38	0.01				AAS	SEDIMENTARY	UNKNOWN	UNKNOWN	CLAYSTONE																											42		35		0.2
AKF642		USGS		Geochemistry of rock samples from the National Geochemical Database: U.S. Geological Survey, Reston, VA.	U.S. Geological Survey	USGS		40.9381	-117.38	0.01				ES	SEDIMENTARY	UNKNOWN	UNKNOWN	CLAYSTONE																							5	700	30	10	30
AKF693		USGS		Geochemistry of rock samples from the National Geochemical Database: U.S. Geological Survey, Reston, VA.	U.S. Geological Survey	USGS		40.9456	-117.316	0.01				AAS	SEDIMENTARY	UNKNOWN	UNKNOWN	CLAYSTONE																											16		75		0.4
AKF693		USGS		Geochemistry of rock samples from the National Geochemical Database: U.S. Geological Survey, Reston, VA.	U.S. Geological Survey	USGS		40.9456	-117.316	0.01				COL	SEDIMENTARY	UNKNOWN	UNKNOWN	CLAYSTONE																														80
AKF693		USGS		Geochemistry of rock samples from the National Geochemical Database: U.S. Geological Survey, Reston, VA.	U.S. Geological Survey	USGS		40.9456	-117.316	0.01				ES	SEDIMENTARY	UNKNOWN	UNKNOWN	CLAYSTONE																							1	20	30	5	20				1
AKF696		USGS		Geochemistry of rock samples from the National Geochemical Database: U.S. Geological Survey, Reston, VA.	U.S. Geological Survey	USGS		40.9461	-117.316	0.01				AAS	SEDIMENTARY	UNKNOWN	UNKNOWN	CLAYSTONE																													35		0.2
AKF696		USGS		Geochemistry of rock samples from the National Geochemical Database: U.S. Geological Survey, Reston, VA.	U.S. Geological Survey	USGS		40.9461	-117.316	0.01				COL	SEDIMENTARY	UNKNOWN	UNKNOWN	CLAYSTONE																														80
AKF696		USGS		Geochemistry of rock samples from the National Geochemical Database: U.S. Geological Survey, Reston, VA.	U.S. Geological Survey	USGS		40.9461	-117.316	0.01				ES	SEDIMENTARY	UNKNOWN	UNKNOWN	CLAYSTONE																							1	20	15	5	30
AKF834		USGS		Geochemistry of rock samples from the National Geochemical Database: U.S. Geological Survey, Reston, VA.	U.S. Geological Survey	USGS		40.915	-117.399	0.01				AAS	SEDIMENTARY	UNKNOWN	UNKNOWN	CLAYSTONE																											250		65		1
AKF834		USGS		Geochemistry of rock samples from the National Geochemical Database: U.S. Geological Survey, Reston, VA.	U.S. Geological Survey	USGS		40.915	-117.399	0.01				COL	SEDIMENTARY	UNKNOWN	UNKNOWN	CLAYSTONE																														10
AKF834		USGS		Geochemistry of rock samples from the National Geochemical Database: U.S. Geological Survey, Reston, VA.	U.S. Geological Survey	USGS		40.915	-117.399	0.01				ES	SEDIMENTARY	UNKNOWN	UNKNOWN	CLAYSTONE																							5	1000	30	10	300
AKG247		USGS		Geochemistry of rock samples from the National Geochemical Database: U.S. Geological Survey, Reston, VA.	U.S. Geological Survey	USGS		40.8933	-117.389	0.01				COL	SEDIMENTARY	UNKNOWN	UNKNOWN	CLAYSTONE
AKG235		USGS		Geochemistry of rock samples from the National Geochemical Database: U.S. Geological Survey, Reston, VA.	U.S. Geological Survey	USGS		40.8792	-117.396	0.01				AAS	SEDIMENTARY	UNKNOWN	UNKNOWN	CLAYSTONE																											10		350		0.2
AKG235		USGS		Geochemistry of rock samples from the National Geochemical Database: U.S. Geological Survey, Reston, VA.	U.S. Geological Survey	USGS		40.8792	-117.396	0.01				COL	SEDIMENTARY	UNKNOWN	UNKNOWN	CLAYSTONE																														20
AKG235		USGS		Geochemistry of rock samples from the National Geochemical Database: U.S. Geological Survey, Reston, VA.	U.S. Geological Survey	USGS		40.8792	-117.396	0.01				ES	SEDIMENTARY	UNKNOWN	UNKNOWN	CLAYSTONE																							5		30	50	20
AKG236		USGS		Geochemistry of rock samples from the National Geochemical Database: U.S. Geological Survey, Reston, VA.	U.S. Geological Survey	USGS		40.8792	-117.396	0.01				AAS	SEDIMENTARY	UNKNOWN	UNKNOWN	CLAYSTONE																											13		200		0.4
AKG236		USGS		Geochemistry of rock samples from the National Geochemical Database: U.S. Geological Survey, Reston, VA.	U.S. Geological Survey	USGS		40.8792	-117.396	0.01				COL	SEDIMENTARY	UNKNOWN	UNKNOWN	CLAYSTONE																														10
AKG236		USGS		Geochemistry of rock samples from the National Geochemical Database: U.S. Geological Survey, Reston, VA.	U.S. Geological Survey	USGS		40.8792	-117.396	0.01				ES	SEDIMENTARY	UNKNOWN	UNKNOWN	CLAYSTONE																							3		10		50
AKG245		USGS		Geochemistry of rock samples from the National Geochemical Database: U.S. Geological Survey, Reston, VA.	U.S. Geological Survey	USGS		40.8919	-117.388	0.01				AAS	SEDIMENTARY	UNKNOWN	UNKNOWN	CLAYSTONE																											43000		2000		7.8
AKG245		USGS		Geochemistry of rock samples from the National Geochemical Database: U.S. Geological Survey, Reston, VA.	U.S. Geological Survey	USGS		40.8919	-117.388	0.01				ES	SEDIMENTARY	UNKNOWN	UNKNOWN	CLAYSTONE																							20	500	30	20					5
AKG247		USGS		Geochemistry of rock samples from the National Geochemical Database: U.S. Geological Survey, Reston, VA.	U.S. Geological Survey	USGS		40.8933	-117.389	0.01				AAS	SEDIMENTARY	UNKNOWN	UNKNOWN	CLAYSTONE																											15000		2000		3.2
AKG247		USGS		Geochemistry of rock samples from the National Geochemical Database: U.S. Geological Survey, Reston, VA.	U.S. Geological Survey	USGS		40.8933	-117.389	0.01				ES	SEDIMENTARY	UNKNOWN	UNKNOWN	CLAYSTONE																							10	1500	100	50	10000
AKG253		USGS		Geochemistry of rock samples from the National Geochemical Database: U.S. Geological Survey, Reston, VA.	U.S. Geological Survey	USGS		40.8956	-117.391	0.01				AAS	SEDIMENTARY	UNKNOWN	UNKNOWN	CLAYSTONE																											2800		400		1.4
AKG253		USGS		Geochemistry of rock samples from the National Geochemical Database: U.S. Geological Survey, Reston, VA.	U.S. Geological Survey	USGS		40.8956	-117.391	0.01				COL	SEDIMENTARY	UNKNOWN	UNKNOWN	CLAYSTONE																														20
AKG253		USGS		Geochemistry of rock samples from the National Geochemical Database: U.S. Geological Survey, Reston, VA.	U.S. Geological Survey	USGS		40.8956	-117.391	0.01				ES	SEDIMENTARY	UNKNOWN	UNKNOWN	CLAYSTONE																							15	100	30	10	7000		200		0.5
AKG260		USGS		Geochemistry of rock samples from the National Geochemical Database: U.S. Geological Survey, Reston, VA.	U.S. Geological Survey	USGS		40.9092	-117.392	0.01				AAS	SEDIMENTARY	UNKNOWN	UNKNOWN	CLAYSTONE																											24000		3000		0.6
AKG260		USGS		Geochemistry of rock samples from the National Geochemical Database: U.S. Geological Survey, Reston, VA.	U.S. Geological Survey	USGS		40.9092	-117.392	0.01				COL	SEDIMENTARY	UNKNOWN	UNKNOWN	CLAYSTONE
AKG260		USGS		Geochemistry of rock samples from the National Geochemical Database: U.S. Geological Survey, Reston, VA.	U.S. Geological Survey	USGS		40.9092	-117.392	0.01				ES	SEDIMENTARY	UNKNOWN	UNKNOWN	CLAYSTONE																							0.7	100	30	20	20000		5000
AKG352		USGS		Geochemistry of rock samples from the National Geochemical Database: U.S. Geological Survey, Reston, VA.	U.S. Geological Survey	USGS		40.8892	-117.418	0.01				AAS	SEDIMENTARY	UNKNOWN	UNKNOWN	CLAYSTONE																											17		30
AKG352		USGS		Geochemistry of rock samples from the National Geochemical Database: U.S. Geological Survey, Reston, VA.	U.S. Geological Survey	USGS		40.8892	-117.418	0.01				ES	SEDIMENTARY	UNKNOWN	UNKNOWN	CLAYSTONE																							0.5	200	20	5	100
AKG370		USGS		Geochemistry of rock samples from the National Geochemical Database: U.S. Geological Survey, Reston, VA.	U.S. Geological Survey	USGS		40.8958	-117.419	0.01				AAS	SEDIMENTARY	UNKNOWN	UNKNOWN	CLAYSTONE																											55	1	50		1.2
AKG370		USGS		Geochemistry of rock samples from the National Geochemical Database: U.S. Geological Survey, Reston, VA.	U.S. Geological Survey	USGS		40.8958	-117.419	0.01				COL	SEDIMENTARY	UNKNOWN	UNKNOWN	CLAYSTONE
AKG370		USGS		Geochemistry of rock samples from the National Geochemical Database: U.S. Geological Survey, Reston, VA.	U.S. Geological Survey	USGS		40.8958	-117.419	0.01				ES	SEDIMENTARY	UNKNOWN	UNKNOWN	CLAYSTONE																							7	700	20	15	150
AKG385		USGS		Geochemistry of rock samples from the National Geochemical Database: U.S. Geological Survey, Reston, VA.	U.S. Geological Survey	USGS		40.8875	-117.425	0.01				AAS	SEDIMENTARY	UNKNOWN	UNKNOWN	CLAYSTONE																											25000	3	2400		16
AKG385		USGS		Geochemistry of rock samples from the National Geochemical Database: U.S. Geological Survey, Reston, VA.	U.S. Geological Survey	USGS		40.8875	-117.425	0.01				COL	SEDIMENTARY	UNKNOWN	UNKNOWN	CLAYSTONE
AKG385		USGS		Geochemistry of rock samples from the National Geochemical Database: U.S. Geological Survey, Reston, VA.	U.S. Geological Survey	USGS		40.8875	-117.425	0.01				ES	SEDIMENTARY	UNKNOWN	UNKNOWN	CLAYSTONE																								200	30	20	20000		5000		7
AKG574		USGS		Geochemistry of rock samples from the National Geochemical Database: U.S. Geological Survey, Reston, VA.	U.S. Geological Survey	USGS		40.8989	-117.406	0.01				AAS	SEDIMENTARY	UNKNOWN	UNKNOWN	CLAYSTONE																											75	1	50		0.4
AKG574		USGS		Geochemistry of rock samples from the National Geochemical Database: U.S. Geological Survey, Reston, VA.	U.S. Geological Survey	USGS		40.8989	-117.406	0.01				ES	SEDIMENTARY	UNKNOWN	UNKNOWN	CLAYSTONE																							5	500	20	10	50
AKG581		USGS		Geochemistry of rock samples from the National Geochemical Database: U.S. Geological Survey, Reston, VA.	U.S. Geological Survey	USGS		40.9014	-117.405	0.01				AAS	SEDIMENTARY	UNKNOWN	UNKNOWN	CLAYSTONE																											33	1.6	60		0.6
AKG581		USGS		Geochemistry of rock samples from the National Geochemical Database: U.S. Geological Survey, Reston, VA.	U.S. Geological Survey	USGS		40.9014	-117.405	0.01				COL	SEDIMENTARY	UNKNOWN	UNKNOWN	CLAYSTONE
AKG581		USGS		Geochemistry of rock samples from the National Geochemical Database: U.S. Geological Survey, Reston, VA.	U.S. Geological Survey	USGS		40.9014	-117.405	0.01				ES	SEDIMENTARY	UNKNOWN	UNKNOWN	CLAYSTONE																							10	70	10	20	30
AKG586		USGS		Geochemistry of rock samples from the National Geochemical Database: U.S. Geological Survey, Reston, VA.	U.S. Geological Survey	USGS		40.9125	-117.41	0.01				AAS	SEDIMENTARY	UNKNOWN	UNKNOWN	CLAYSTONE																											20	1	30		0.6
AKG586		USGS		Geochemistry of rock samples from the National Geochemical Database: U.S. Geological Survey, Reston, VA.	U.S. Geological Survey	USGS		40.9125	-117.41	0.01				COL	SEDIMENTARY	UNKNOWN	UNKNOWN	CLAYSTONE																														40
AKG586		USGS		Geochemistry of rock samples from the National Geochemical Database: U.S. Geological Survey, Reston, VA.	U.S. Geological Survey	USGS		40.9125	-117.41	0.01				ES	SEDIMENTARY	UNKNOWN	UNKNOWN	CLAYSTONE																							5	50	15		15
AKG615		USGS		Geochemistry of rock samples from the National Geochemical Database: U.S. Geological Survey, Reston, VA.	U.S. Geological Survey	USGS		40.9411	-117.401	0.01				AAS	SEDIMENTARY	UNKNOWN	UNKNOWN	CLAYSTONE																											2500	2	2500		1
AKG615		USGS		Geochemistry of rock samples from the National Geochemical Database: U.S. Geological Survey, Reston, VA.	U.S. Geological Survey	USGS		40.9411	-117.401	0.01				COL	SEDIMENTARY	UNKNOWN	UNKNOWN	CLAYSTONE
AKG615		USGS		Geochemistry of rock samples from the National Geochemical Database: U.S. Geological Survey, Reston, VA.	U.S. Geological Survey	USGS		40.9411	-117.401	0.01				ES	SEDIMENTARY	UNKNOWN	UNKNOWN	CLAYSTONE																							10	1500	30	10	500		200		1
AKG626		USGS		Geochemistry of rock samples from the National Geochemical Database: U.S. Geological Survey, Reston, VA.	U.S. Geological Survey	USGS		40.9328	-117.405	0.01				AAS	SEDIMENTARY	UNKNOWN	UNKNOWN	CLAYSTONE																												1.4	60		0.4
AKG626		USGS		Geochemistry of rock samples from the National Geochemical Database: U.S. Geological Survey, Reston, VA.	U.S. Geological Survey	USGS		40.9328	-117.405	0.01				COL	SEDIMENTARY	UNKNOWN	UNKNOWN	CLAYSTONE																														10
AKG626		USGS		Geochemistry of rock samples from the National Geochemical Database: U.S. Geological Survey, Reston, VA.	U.S. Geological Survey	USGS		40.9328	-117.405	0.01				ES	SEDIMENTARY	UNKNOWN	UNKNOWN	CLAYSTONE																							5	700	10	10	50
AKG632		USGS		Geochemistry of rock samples from the National Geochemical Database: U.S. Geological Survey, Reston, VA.	U.S. Geological Survey	USGS		40.9253	-117.404	0.01				AAS	SEDIMENTARY	UNKNOWN	UNKNOWN	CLAYSTONE																											22	1.2	70		0.6
AKG632		USGS		Geochemistry of rock samples from the National Geochemical Database: U.S. Geological Survey, Reston, VA.	U.S. Geological Survey	USGS		40.9253	-117.404	0.01				COL	SEDIMENTARY	UNKNOWN	UNKNOWN	CLAYSTONE																														60
AKG632		USGS		Geochemistry of rock samples from the National Geochemical Database: U.S. Geological Survey, Reston, VA.	U.S. Geological Survey	USGS		40.9253	-117.404	0.01				ES	SEDIMENTARY	UNKNOWN	UNKNOWN	CLAYSTONE																							2	1000	30	5	50				0.5
AKG639		USGS		Geochemistry of rock samples from the National Geochemical Database: U.S. Geological Survey, Reston, VA.	U.S. Geological Survey	USGS		40.9397	-117.402	0.01				AAS	SEDIMENTARY	UNKNOWN	UNKNOWN	CLAYSTONE																											42		75		0.6
AKG639		USGS		Geochemistry of rock samples from the National Geochemical Database: U.S. Geological Survey, Reston, VA.	U.S. Geological Survey	USGS		40.9397	-117.402	0.01				ES	SEDIMENTARY	UNKNOWN	UNKNOWN	CLAYSTONE																							10	500	5	10	50
AKG640		USGS		Geochemistry of rock samples from the National Geochemical Database: U.S. Geological Survey, Reston, VA.	U.S. Geological Survey	USGS		40.9386	-117.405	0.01				AAS	SEDIMENTARY	UNKNOWN	UNKNOWN	CLAYSTONE																											2000		45		0.6
AKG640		USGS		Geochemistry of rock samples from the National Geochemical Database: U.S. Geological Survey, Reston, VA.	U.S. Geological Survey	USGS		40.9386	-117.405	0.01				COL	SEDIMENTARY	UNKNOWN	UNKNOWN	CLAYSTONE
AKG640		USGS		Geochemistry of rock samples from the National Geochemical Database: U.S. Geological Survey, Reston, VA.	U.S. Geological Survey	USGS		40.9386	-117.405	0.01				ES	SEDIMENTARY	UNKNOWN	UNKNOWN	CLAYSTONE																							10	5000	70	30	500
AKG641		USGS		Geochemistry of rock samples from the National Geochemical Database: U.S. Geological Survey, Reston, VA.	U.S. Geological Survey	USGS		40.9372	-117.406	0.01				AAS	SEDIMENTARY	UNKNOWN	UNKNOWN	CLAYSTONE																											55		100		0.8
AKG641		USGS		Geochemistry of rock samples from the National Geochemical Database: U.S. Geological Survey, Reston, VA.	U.S. Geological Survey	USGS		40.9372	-117.406	0.01				COL	SEDIMENTARY	UNKNOWN	UNKNOWN	CLAYSTONE
AKG641		USGS		Geochemistry of rock samples from the National Geochemical Database: U.S. Geological Survey, Reston, VA.	U.S. Geological Survey	USGS		40.9372	-117.406	0.01				ES	SEDIMENTARY	UNKNOWN	UNKNOWN	CLAYSTONE																							15	1000	200	50	50
AKG729		USGS		Geochemistry of rock samples from the National Geochemical Database: U.S. Geological Survey, Reston, VA.	U.S. Geological Survey	USGS		40.9269	-117.414	0.01				AAS	SEDIMENTARY	UNKNOWN	UNKNOWN	CLAYSTONE																											45		55		1.2
AKG729		USGS		Geochemistry of rock samples from the National Geochemical Database: U.S. Geological Survey, Reston, VA.	U.S. Geological Survey	USGS		40.9269	-117.414	0.01				ES	SEDIMENTARY	UNKNOWN	UNKNOWN	CLAYSTONE																							7	1500	70	20	70
AKG732		USGS		Geochemistry of rock samples from the National Geochemical Database: U.S. Geological Survey, Reston, VA.	U.S. Geological Survey	USGS		40.9239	-117.41	0.01				AAS	SEDIMENTARY	UNKNOWN	UNKNOWN	CLAYSTONE																											25		35		0.6
AKG732		USGS		Geochemistry of rock samples from the National Geochemical Database: U.S. Geological Survey, Reston, VA.	U.S. Geological Survey	USGS		40.9239	-117.41	0.01				COL	SEDIMENTARY	UNKNOWN	UNKNOWN	CLAYSTONE
AKG732		USGS		Geochemistry of rock samples from the National Geochemical Database: U.S. Geological Survey, Reston, VA.	U.S. Geological Survey	USGS		40.9239	-117.41	0.01				ES	SEDIMENTARY	UNKNOWN	UNKNOWN	CLAYSTONE																							1.5	300	20		20
AKG741		USGS		Geochemistry of rock samples from the National Geochemical Database: U.S. Geological Survey, Reston, VA.	U.S. Geological Survey	USGS		40.9236	-117.4	0.01				AAS	SEDIMENTARY	UNKNOWN	UNKNOWN	CLAYSTONE																											150	2	420		1
AKG741		USGS		Geochemistry of rock samples from the National Geochemical Database: U.S. Geological Survey, Reston, VA.	U.S. Geological Survey	USGS		40.9236	-117.4	0.01				COL	SEDIMENTARY	UNKNOWN	UNKNOWN	CLAYSTONE																														140
AKG741		USGS		Geochemistry of rock samples from the National Geochemical Database: U.S. Geological Survey, Reston, VA.	U.S. Geological Survey	USGS		40.9236	-117.4	0.01				ES	SEDIMENTARY	UNKNOWN	UNKNOWN	CLAYSTONE																							10		150	20	300		300	300	0.5
AKG751		USGS		Geochemistry of rock samples from the National Geochemical Database: U.S. Geological Survey, Reston, VA.	U.S. Geological Survey	USGS		40.935	-117.369	0.01				AAS	SEDIMENTARY	UNKNOWN	UNKNOWN	CLAYSTONE																											30	1.4	90		0.8
AKG751		USGS		Geochemistry of rock samples from the National Geochemical Database: U.S. Geological Survey, Reston, VA.	U.S. Geological Survey	USGS		40.935	-117.369	0.01				COL	SEDIMENTARY	UNKNOWN	UNKNOWN	CLAYSTONE
AKG751		USGS		Geochemistry of rock samples from the National Geochemical Database: U.S. Geological Survey, Reston, VA.	U.S. Geological Survey	USGS		40.935	-117.369	0.01				ES	SEDIMENTARY	UNKNOWN	UNKNOWN	CLAYSTONE																							7	700	50	5	70		200
AKG756		USGS		Geochemistry of rock samples from the National Geochemical Database: U.S. Geological Survey, Reston, VA.	U.S. Geological Survey	USGS		40.9411	-117.371	0.01				AAS	SEDIMENTARY	UNKNOWN	UNKNOWN	CLAYSTONE																											5000	3			20
AKG756		USGS		Geochemistry of rock samples from the National Geochemical Database: U.S. Geological Survey, Reston, VA.	U.S. Geological Survey	USGS		40.9411	-117.371	0.01				COL	SEDIMENTARY	UNKNOWN	UNKNOWN	CLAYSTONE																														10
AKG756		USGS		Geochemistry of rock samples from the National Geochemical Database: U.S. Geological Survey, Reston, VA.	U.S. Geological Survey	USGS		40.9411	-117.371	0.01				ES	SEDIMENTARY	UNKNOWN	UNKNOWN	CLAYSTONE																							0.5	100	10		7000				15
AKG757		USGS		Geochemistry of rock samples from the National Geochemical Database: U.S. Geological Survey, Reston, VA.	U.S. Geological Survey	USGS		40.9156	-117.342	0.01				AAS	SEDIMENTARY	UNKNOWN	UNKNOWN	CLAYSTONE																												1.4			1.8
AKG757		USGS		Geochemistry of rock samples from the National Geochemical Database: U.S. Geological Survey, Reston, VA.	U.S. Geological Survey	USGS		40.9156	-117.342	0.01				COL	SEDIMENTARY	UNKNOWN	UNKNOWN	CLAYSTONE
AKG757		USGS		Geochemistry of rock samples from the National Geochemical Database: U.S. Geological Survey, Reston, VA.	U.S. Geological Survey	USGS		40.9156	-117.342	0.01				ES	SEDIMENTARY	UNKNOWN	UNKNOWN	CLAYSTONE																							2	1000	15	5	15
AKG775		USGS		Geochemistry of rock samples from the National Geochemical Database: U.S. Geological Survey, Reston, VA.	U.S. Geological Survey	USGS		40.9081	-117.361	0.01				AAS	SEDIMENTARY	UNKNOWN	UNKNOWN	CLAYSTONE																											140		30		0.4
AKG775		USGS		Geochemistry of rock samples from the National Geochemical Database: U.S. Geological Survey, Reston, VA.	U.S. Geological Survey	USGS		40.9081	-117.361	0.01				COL	SEDIMENTARY	UNKNOWN	UNKNOWN	CLAYSTONE																														10
AKG775		USGS		Geochemistry of rock samples from the National Geochemical Database: U.S. Geological Survey, Reston, VA.	U.S. Geological Survey	USGS		40.9081	-117.361	0.01				ES	SEDIMENTARY	UNKNOWN	UNKNOWN	CLAYSTONE																							10	700	15	7	200				0.7
AKG778		USGS		Geochemistry of rock samples from the National Geochemical Database: U.S. Geological Survey, Reston, VA.	U.S. Geological Survey	USGS		40.9108	-117.361	0.01				AAS	SEDIMENTARY	UNKNOWN	UNKNOWN	CLAYSTONE																											120		60		2.4
AKG778		USGS		Geochemistry of rock samples from the National Geochemical Database: U.S. Geological Survey, Reston, VA.	U.S. Geological Survey	USGS		40.9108	-117.361	0.01				COL	SEDIMENTARY	UNKNOWN	UNKNOWN	CLAYSTONE																														10
AKG778		USGS		Geochemistry of rock samples from the National Geochemical Database: U.S. Geological Survey, Reston, VA.	U.S. Geological Survey	USGS		40.9108	-117.361	0.01				ES	SEDIMENTARY	UNKNOWN	UNKNOWN	CLAYSTONE																							15	700	50	20	100				1
AKG829		USGS		Geochemistry of rock samples from the National Geochemical Database: U.S. Geological Survey, Reston, VA.	U.S. Geological Survey	USGS		40.7814	-117.258	0.01				AAS	SEDIMENTARY	UNKNOWN	UNKNOWN	CLAYSTONE																											350	2.6	60		4.2
AKG829		USGS		Geochemistry of rock samples from the National Geochemical Database: U.S. Geological Survey, Reston, VA.	U.S. Geological Survey	USGS		40.7814	-117.258	0.01				COL	SEDIMENTARY	UNKNOWN	UNKNOWN	CLAYSTONE																														10
AKG829		USGS		Geochemistry of rock samples from the National Geochemical Database: U.S. Geological Survey, Reston, VA.	U.S. Geological Survey	USGS		40.7814	-117.258	0.01				ES	SEDIMENTARY	UNKNOWN	UNKNOWN	CLAYSTONE																							2	1500	30		300				7
AKG920		USGS		Geochemistry of rock samples from the National Geochemical Database: U.S. Geological Survey, Reston, VA.	U.S. Geological Survey	USGS		40.7789	-117.282	0.01				AAS	SEDIMENTARY	UNKNOWN	UNKNOWN	CLAYSTONE																											68		38		0.6
AKG920		USGS		Geochemistry of rock samples from the National Geochemical Database: U.S. Geological Survey, Reston, VA.	U.S. Geological Survey	USGS		40.7789	-117.282	0.01				COL	SEDIMENTARY	UNKNOWN	UNKNOWN	CLAYSTONE																														20
AKG920		USGS		Geochemistry of rock samples from the National Geochemical Database: U.S. Geological Survey, Reston, VA.	U.S. Geological Survey	USGS		40.7789	-117.282	0.01				ES	SEDIMENTARY	UNKNOWN	UNKNOWN	CLAYSTONE																							20	500	70	30	500		300	1000	1.5
AMI105		USGS		Geochemistry of rock samples from the National Geochemical Database: U.S. Geological Survey, Reston, VA.	U.S. Geological Survey	USGS		47.4728	-113.119	0.01	66	66	66	AAS	SEDIMENTARY	UNKNOWN	UNKNOWN	CLAYSTONE																													80
AMI105		USGS		Geochemistry of rock samples from the National Geochemical Database: U.S. Geological Survey, Reston, VA.	U.S. Geological Survey	USGS		47.4728	-113.119	0.01	66	66	66	ES	SEDIMENTARY	UNKNOWN	UNKNOWN	CLAYSTONE																							2	150	20	15	10
AMI106		USGS		Geochemistry of rock samples from the National Geochemical Database: U.S. Geological Survey, Reston, VA.	U.S. Geological Survey	USGS		47.4728	-113.119	0.01	66	66	66	AAS	SEDIMENTARY	UNKNOWN	UNKNOWN	CLAYSTONE																													82
AMI106		USGS		Geochemistry of rock samples from the National Geochemical Database: U.S. Geological Survey, Reston, VA.	U.S. Geological Survey	USGS		47.4728	-113.119	0.01	66	66	66	ES	SEDIMENTARY	UNKNOWN	UNKNOWN	CLAYSTONE																							1.5	150	20	15	15
AMI107		USGS		Geochemistry of rock samples from the National Geochemical Database: U.S. Geological Survey, Reston, VA.	U.S. Geological Survey	USGS		47.4728	-113.119	0.01	66	66	66	AAS	SEDIMENTARY	UNKNOWN	UNKNOWN	CLAYSTONE																											10		50		0.4
AMI107		USGS		Geochemistry of rock samples from the National Geochemical Database: U.S. Geological Survey, Reston, VA.	U.S. Geological Survey	USGS		47.4728	-113.119	0.01	66	66	66	ES	SEDIMENTARY	UNKNOWN	UNKNOWN	CLAYSTONE																							1.5	500	15	10	20
AMI108		USGS		Geochemistry of rock samples from the National Geochemical Database: U.S. Geological Survey, Reston, VA.	U.S. Geological Survey	USGS		47.4728	-113.119	0.01	66	66	66	AAS	SEDIMENTARY	UNKNOWN	UNKNOWN	CLAYSTONE																											64		110		0.7
AMI108		USGS		Geochemistry of rock samples from the National Geochemical Database: U.S. Geological Survey, Reston, VA.	U.S. Geological Survey	USGS		47.4728	-113.119	0.01	66	66	66	ES	SEDIMENTARY	UNKNOWN	UNKNOWN	CLAYSTONE																							2	5000	30	20	70
AMI109		USGS		Geochemistry of rock samples from the National Geochemical Database: U.S. Geological Survey, Reston, VA.	U.S. Geological Survey	USGS		47.4728	-113.119	0.01	66	66	66	AAS	SEDIMENTARY	UNKNOWN	UNKNOWN	CLAYSTONE																											13		80		0.6
AMI109		USGS		Geochemistry of rock samples from the National Geochemical Database: U.S. Geological Survey, Reston, VA.	U.S. Geological Survey	USGS		47.4728	-113.119	0.01	66	66	66	ES	SEDIMENTARY	UNKNOWN	UNKNOWN	CLAYSTONE																							1.5	2000	15	10	20
AMI118		USGS		Geochemistry of rock samples from the National Geochemical Database: U.S. Geological Survey, Reston, VA.	U.S. Geological Survey	USGS		47.4711	-113.121	0.01	66	66	66	AAS	SEDIMENTARY	UNKNOWN	UNKNOWN	CLAYSTONE																											99		130		0.2
AMI118		USGS		Geochemistry of rock samples from the National Geochemical Database: U.S. Geological Survey, Reston, VA.	U.S. Geological Survey	USGS		47.4711	-113.121	0.01	66	66	66	ES	SEDIMENTARY	UNKNOWN	UNKNOWN	CLAYSTONE																							1.5	700	20	15	50
AMI119		USGS		Geochemistry of rock samples from the National Geochemical Database: U.S. Geological Survey, Reston, VA.	U.S. Geological Survey	USGS		47.4711	-113.121	0.01	66	66	66	AAS	SEDIMENTARY	UNKNOWN	UNKNOWN	CLAYSTONE																													120		0.2
AMI119		USGS		Geochemistry of rock samples from the National Geochemical Database: U.S. Geological Survey, Reston, VA.	U.S. Geological Survey	USGS		47.4711	-113.121	0.01	66	66	66	ES	SEDIMENTARY	UNKNOWN	UNKNOWN	CLAYSTONE																							1.5	1500	15	15	20
AMI122		USGS		Geochemistry of rock samples from the National Geochemical Database: U.S. Geological Survey, Reston, VA.	U.S. Geological Survey	USGS		47.47	-113.122	0.01	66	66	66	AAS	SEDIMENTARY	UNKNOWN	UNKNOWN	CLAYSTONE																											5000		130		9
AMI122		USGS		Geochemistry of rock samples from the National Geochemical Database: U.S. Geological Survey, Reston, VA.	U.S. Geological Survey	USGS		47.47	-113.122	0.01	66	66	66	ES	SEDIMENTARY	UNKNOWN	UNKNOWN	CLAYSTONE																							1.5	150	20	20	2000				10
AMS144		USGS		Geochemistry of rock samples from the National Geochemical Database: U.S. Geological Survey, Reston, VA.	U.S. Geological Survey	USGS		47.6408	-112.936	0.01	65	65	65	ES	SEDIMENTARY	UNKNOWN	UNKNOWN	CLAYSTONE																							5	1500	50	5	50
BBC009		USGS		Geochemistry of rock samples from the National Geochemical Database: U.S. Geological Survey, Reston, VA.	U.S. Geological Survey	USGS		44.8292	-109.904	0.01	18	18	18	ES	SEDIMENTARY	UNKNOWN	UNKNOWN	CLAYSTONE																							1	150	5	5	50
BCB681		USGS		Geochemistry of rock samples from the National Geochemical Database: U.S. Geological Survey, Reston, VA.	U.S. Geological Survey	USGS		35	-116.917	0.01	3	3	3	AAS	SEDIMENTARY	UNKNOWN	UNKNOWN	CLAYSTONE																															300
BCB681		USGS		Geochemistry of rock samples from the National Geochemical Database: U.S. Geological Survey, Reston, VA.	U.S. Geological Survey	USGS		35	-116.917	0.01	3	3	3	ES	SEDIMENTARY	UNKNOWN	UNKNOWN	CLAYSTONE																							0.7	30			50		700		300
BCB682		USGS		Geochemistry of rock samples from the National Geochemical Database: U.S. Geological Survey, Reston, VA.	U.S. Geological Survey	USGS		35	-116.917	0.01	3	3	3	AAS	SEDIMENTARY	UNKNOWN	UNKNOWN	CLAYSTONE																															25
BCB682		USGS		Geochemistry of rock samples from the National Geochemical Database: U.S. Geological Survey, Reston, VA.	U.S. Geological Survey	USGS		35	-116.917	0.01	3	3	3	ES	SEDIMENTARY	UNKNOWN	UNKNOWN	CLAYSTONE																							0.2	30	5		30		200		30
BCB683		USGS		Geochemistry of rock samples from the National Geochemical Database: U.S. Geological Survey, Reston, VA.	U.S. Geological Survey	USGS		35	-116.917	0.01	3	3	3	AAS	SEDIMENTARY	UNKNOWN	UNKNOWN	CLAYSTONE																															30
BCB683		USGS		Geochemistry of rock samples from the National Geochemical Database: U.S. Geological Survey, Reston, VA.	U.S. Geological Survey	USGS		35	-116.917	0.01	3	3	3	ES	SEDIMENTARY	UNKNOWN	UNKNOWN	CLAYSTONE																							0.1	50			7		500		20
BCB684		USGS		Geochemistry of rock samples from the National Geochemical Database: U.S. Geological Survey, Reston, VA.	U.S. Geological Survey	USGS		35	-116.917	0.01	3	3	3	AAS	SEDIMENTARY	UNKNOWN	UNKNOWN	CLAYSTONE																															23
BCB684		USGS		Geochemistry of rock samples from the National Geochemical Database: U.S. Geological Survey, Reston, VA.	U.S. Geological Survey	USGS		35	-116.917	0.01	3	3	3	ES	SEDIMENTARY	UNKNOWN	UNKNOWN	CLAYSTONE																							0.3				5		700	300	50
BCB685		USGS		Geochemistry of rock samples from the National Geochemical Database: U.S. Geological Survey, Reston, VA.	U.S. Geological Survey	USGS		35	-116.917	0.01	3	3	3	AAS	SEDIMENTARY	UNKNOWN	UNKNOWN	CLAYSTONE																															2.5
BCB685		USGS		Geochemistry of rock samples from the National Geochemical Database: U.S. Geological Survey, Reston, VA.	U.S. Geological Survey	USGS		35	-116.917	0.01	3	3	3	ES	SEDIMENTARY	UNKNOWN	UNKNOWN	CLAYSTONE																							1	50			10			700	10
BCB686		USGS		Geochemistry of rock samples from the National Geochemical Database: U.S. Geological Survey, Reston, VA.	U.S. Geological Survey	USGS		35	-116.917	0.01	3	3	3	AAS	SEDIMENTARY	UNKNOWN	UNKNOWN	CLAYSTONE																															5.5
BCB686		USGS		Geochemistry of rock samples from the National Geochemical Database: U.S. Geological Survey, Reston, VA.	U.S. Geological Survey	USGS		35	-116.917	0.01	3	3	3	ES	SEDIMENTARY	UNKNOWN	UNKNOWN	CLAYSTONE																							0.2	5000	5	5	10		1000		15
BCB688		USGS		Geochemistry of rock samples from the National Geochemical Database: U.S. Geological Survey, Reston, VA.	U.S. Geological Survey	USGS		35	-116.917	0.01	3	3	3	AAS	SEDIMENTARY	UNKNOWN	UNKNOWN	CLAYSTONE																															4
BCB688		USGS		Geochemistry of rock samples from the National Geochemical Database: U.S. Geological Survey, Reston, VA.	U.S. Geological Survey	USGS		35	-116.917	0.01	3	3	3	ES	SEDIMENTARY	UNKNOWN	UNKNOWN	CLAYSTONE																							0.2	70	5						10
BCB689		USGS		Geochemistry of rock samples from the National Geochemical Database: U.S. Geological Survey, Reston, VA.	U.S. Geological Survey	USGS		35	-116.917	0.01	3	3	3	AAS	SEDIMENTARY	UNKNOWN	UNKNOWN	CLAYSTONE																															30
BCB689		USGS		Geochemistry of rock samples from the National Geochemical Database: U.S. Geological Survey, Reston, VA.	U.S. Geological Survey	USGS		35	-116.917	0.01	3	3	3	ES	SEDIMENTARY	UNKNOWN	UNKNOWN	CLAYSTONE																							0.3	20			7			200	30
BCB690		USGS		Geochemistry of rock samples from the National Geochemical Database: U.S. Geological Survey, Reston, VA.	U.S. Geological Survey	USGS		35	-116.917	0.01	3	3	3	AAS	SEDIMENTARY	UNKNOWN	UNKNOWN	CLAYSTONE																															12
BCB690		USGS		Geochemistry of rock samples from the National Geochemical Database: U.S. Geological Survey, Reston, VA.	U.S. Geological Survey	USGS		35	-116.917	0.01	3	3	3	ES	SEDIMENTARY	UNKNOWN	UNKNOWN	CLAYSTONE																							0.1	30			5				20
BET185		USGS		Geochemistry of rock samples from the National Geochemical Database: U.S. Geological Survey, Reston, VA.	U.S. Geological Survey	USGS		38.8019	-107.263	0.01	22	22	22	COL	SEDIMENTARY	UNKNOWN	UNKNOWN	CLAYSTONE																														10
BET185		USGS		Geochemistry of rock samples from the National Geochemical Database: U.S. Geological Survey, Reston, VA.	U.S. Geological Survey	USGS		38.8019	-107.263	0.01	22	22	22	ES	SEDIMENTARY	UNKNOWN	UNKNOWN	CLAYSTONE																							7	150	5	5	20
BFG504		USGS		Geochemistry of rock samples from the National Geochemical Database: U.S. Geological Survey, Reston, VA.	U.S. Geological Survey	USGS		38.8392	-107.192	0.01	18	18	18	ES	SEDIMENTARY	UNKNOWN	UNKNOWN	CLAYSTONE																							2	700	15	7	20
BGY074		USGS		Geochemistry of rock samples from the National Geochemical Database: U.S. Geological Survey, Reston, VA.	U.S. Geological Survey	USGS		44.0147	-110.54	0.01	65	65	65	ES	SEDIMENTARY	UNKNOWN	UNKNOWN	CLAYSTONE																							5	500	20	20	30				1.5
BHA225		USGS		Geochemistry of rock samples from the National Geochemical Database: U.S. Geological Survey, Reston, VA.	U.S. Geological Survey	USGS		35.75	-109.03	0.01	56	56	56	AAS	SEDIMENTARY	UNKNOWN	UNKNOWN	CLAYSTONE																											15
BHA225		USGS		Geochemistry of rock samples from the National Geochemical Database: U.S. Geological Survey, Reston, VA.	U.S. Geological Survey	USGS		35.75	-109.03	0.01	56	56	56	ES	SEDIMENTARY	UNKNOWN	UNKNOWN	CLAYSTONE																							1	150	7	10	10				0.7
C118694		USGS		Geochemistry of rock samples from the National Geochemical Database: U.S. Geological Survey, Reston, VA.	U.S. Geological Survey	USGS		35.3811	-116.903	0.01				ICPAES	SEDIMENTARY	UNKNOWN	UNKNOWN	CLAYSTONE																							3.22	608	22	11	26.7	0.23	87.1	21
C120403		USGS		Geochemistry of rock samples from the National Geochemical Database: U.S. Geological Survey, Reston, VA.	U.S. Geological Survey	USGS		42.8814	-111.341	0.01	71	71	71	AAS	SEDIMENTARY	UNKNOWN	UNKNOWN	CLAYSTONE
C120403		USGS		Geochemistry of rock samples from the National Geochemical Database: U.S. Geological Survey, Reston, VA.	U.S. Geological Survey	USGS		42.8814	-111.341	0.01	71	71	71	ICPAES	SEDIMENTARY	UNKNOWN	UNKNOWN	CLAYSTONE																						28.4	2.77	469	314	5	36		2480
C120406		USGS		Geochemistry of rock samples from the National Geochemical Database: U.S. Geological Survey, Reston, VA.	U.S. Geological Survey	USGS		42.8803	-111.241	0.01	71	71	71	AAS	SEDIMENTARY	UNKNOWN	UNKNOWN	CLAYSTONE
C120406		USGS		Geochemistry of rock samples from the National Geochemical Database: U.S. Geological Survey, Reston, VA.	U.S. Geological Survey	USGS		42.8803	-111.241	0.01	71	71	71	ICPAES	SEDIMENTARY	UNKNOWN	UNKNOWN	CLAYSTONE																						16.2	12.1	297	243	26	17	6	2640	90
C120412		USGS		Geochemistry of rock samples from the National Geochemical Database: U.S. Geological Survey, Reston, VA.	U.S. Geological Survey	USGS		42.7033	-111.337	0.01	71	71	71	AAS	SEDIMENTARY	UNKNOWN	UNKNOWN	CLAYSTONE
C120412		USGS		Geochemistry of rock samples from the National Geochemical Database: U.S. Geological Survey, Reston, VA.	U.S. Geological Survey	USGS		42.7033	-111.337	0.01	71	71	71	ICPAES	SEDIMENTARY	UNKNOWN	UNKNOWN	CLAYSTONE																							4.46	128	53	4	14		132	30
C120415		USGS		Geochemistry of rock samples from the National Geochemical Database: U.S. Geological Survey, Reston, VA.	U.S. Geological Survey	USGS		42.7478	-111.734	0.01	71	71	71	AAS	SEDIMENTARY	UNKNOWN	UNKNOWN	CLAYSTONE
C120415		USGS		Geochemistry of rock samples from the National Geochemical Database: U.S. Geological Survey, Reston, VA.	U.S. Geological Survey	USGS		42.7478	-111.734	0.01	71	71	71	ICPAES	SEDIMENTARY	UNKNOWN	UNKNOWN	CLAYSTONE																							3.18	151	33	7	10		81	18
C120420		USGS		Geochemistry of rock samples from the National Geochemical Database: U.S. Geological Survey, Reston, VA.	U.S. Geological Survey	USGS		42.703	-111.048	0.01	71	71	71	AAS	SEDIMENTARY	UNKNOWN	UNKNOWN	CLAYSTONE
C120420		USGS		Geochemistry of rock samples from the National Geochemical Database: U.S. Geological Survey, Reston, VA.	U.S. Geological Survey	USGS		42.703	-111.048	0.01	71	71	71	ICPAES	SEDIMENTARY	UNKNOWN	UNKNOWN	CLAYSTONE																							8.64	3570	333	6	25	6	1030	46
C136969		USGS		Geochemistry of rock samples from the National Geochemical Database: U.S. Geological Survey, Reston, VA.	U.S. Geological Survey	USGS		42.7031	-111.434	0.01	71	71	71	AAS	SEDIMENTARY	UNKNOWN	UNKNOWN	CLAYSTONE
C136973		USGS		Geochemistry of rock samples from the National Geochemical Database: U.S. Geological Survey, Reston, VA.	U.S. Geological Survey	USGS		42.7578	-111.337	0.01	71	71	71	AAS	SEDIMENTARY	UNKNOWN	UNKNOWN	CLAYSTONE
C136973		USGS		Geochemistry of rock samples from the National Geochemical Database: U.S. Geological Survey, Reston, VA.	U.S. Geological Survey	USGS		42.7578	-111.337	0.01	71	71	71	FAP	SEDIMENTARY	UNKNOWN	UNKNOWN	CLAYSTONE
C136976		USGS		Geochemistry of rock samples from the National Geochemical Database: U.S. Geological Survey, Reston, VA.	U.S. Geological Survey	USGS		42.8814	-111.409	0.01	71	71	71	AAS	SEDIMENTARY	UNKNOWN	UNKNOWN	CLAYSTONE
CCC967		USGS		Geochemistry of rock samples from the National Geochemical Database: U.S. Geological Survey, Reston, VA.	U.S. Geological Survey	USGS		68.3125	-151.825	0.01				AAS	SEDIMENTARY	UNKNOWN	UNKNOWN	CLAYSTONE																											25		80
CCC967		USGS		Geochemistry of rock samples from the National Geochemical Database: U.S. Geological Survey, Reston, VA.	U.S. Geological Survey	USGS		68.3125	-151.825	0.01				ES	SEDIMENTARY	UNKNOWN	UNKNOWN	CLAYSTONE																							7	500	50	20	50
CCZ013		USGS		Geochemistry of rock samples from the National Geochemical Database: U.S. Geological Survey, Reston, VA.	U.S. Geological Survey	USGS		56.3169	-132.545	0.01				AAS	SEDIMENTARY	UNKNOWN	UNKNOWN	CLAYSTONE																											30		120
CCZ013		USGS		Geochemistry of rock samples from the National Geochemical Database: U.S. Geological Survey, Reston, VA.	U.S. Geological Survey	USGS		56.3169	-132.545	0.01				ES	SEDIMENTARY	UNKNOWN	UNKNOWN	CLAYSTONE																							5	700	30	20	70		200
CCZ014		USGS		Geochemistry of rock samples from the National Geochemical Database: U.S. Geological Survey, Reston, VA.	U.S. Geological Survey	USGS		56.3169	-132.545	0.01				AAS	SEDIMENTARY	UNKNOWN	UNKNOWN	CLAYSTONE																											20		100
CCZ014		USGS		Geochemistry of rock samples from the National Geochemical Database: U.S. Geological Survey, Reston, VA.	U.S. Geological Survey	USGS		56.3169	-132.545	0.01				COL	SEDIMENTARY	UNKNOWN	UNKNOWN	CLAYSTONE
CCZ014		USGS		Geochemistry of rock samples from the National Geochemical Database: U.S. Geological Survey, Reston, VA.	U.S. Geological Survey	USGS		56.3169	-132.545	0.01				ES	SEDIMENTARY	UNKNOWN	UNKNOWN	CLAYSTONE																							5	700	20	15	20		200
CCZ021		USGS		Geochemistry of rock samples from the National Geochemical Database: U.S. Geological Survey, Reston, VA.	U.S. Geological Survey	USGS		56.3233	-132.544	0.01				AAS	SEDIMENTARY	UNKNOWN	UNKNOWN	CLAYSTONE																											40		150
CCZ021		USGS		Geochemistry of rock samples from the National Geochemical Database: U.S. Geological Survey, Reston, VA.	U.S. Geological Survey	USGS		56.3233	-132.544	0.01				COL	SEDIMENTARY	UNKNOWN	UNKNOWN	CLAYSTONE
CCZ021		USGS		Geochemistry of rock samples from the National Geochemical Database: U.S. Geological Survey, Reston, VA.	U.S. Geological Survey	USGS		56.3233	-132.544	0.01				ES	SEDIMENTARY	UNKNOWN	UNKNOWN	CLAYSTONE																							7	3000	100	30	70
CCZ024		USGS		Geochemistry of rock samples from the National Geochemical Database: U.S. Geological Survey, Reston, VA.	U.S. Geological Survey	USGS		56.3233	-132.544	0.01				AAS	SEDIMENTARY	UNKNOWN	UNKNOWN	CLAYSTONE																											30		85
CCZ024		USGS		Geochemistry of rock samples from the National Geochemical Database: U.S. Geological Survey, Reston, VA.	U.S. Geological Survey	USGS		56.3233	-132.544	0.01				COL	SEDIMENTARY	UNKNOWN	UNKNOWN	CLAYSTONE
CCZ024		USGS		Geochemistry of rock samples from the National Geochemical Database: U.S. Geological Survey, Reston, VA.	U.S. Geological Survey	USGS		56.3233	-132.544	0.01				ES	SEDIMENTARY	UNKNOWN	UNKNOWN	CLAYSTONE																							3	1500	30	10	70
CCZ088		USGS		Geochemistry of rock samples from the National Geochemical Database: U.S. Geological Survey, Reston, VA.	U.S. Geological Survey	USGS		56.3403	-132.415	0.01				AAS	SEDIMENTARY	UNKNOWN	UNKNOWN	CLAYSTONE																											65		90
CCZ088		USGS		Geochemistry of rock samples from the National Geochemical Database: U.S. Geological Survey, Reston, VA.	U.S. Geological Survey	USGS		56.3403	-132.415	0.01				ES	SEDIMENTARY	UNKNOWN	UNKNOWN	CLAYSTONE																							10	1000	70	30	100
CDA282		USGS		Geochemistry of rock samples from the National Geochemical Database: U.S. Geological Survey, Reston, VA.	U.S. Geological Survey	USGS		56.1144	-133.48	0.01				AAS	SEDIMENTARY	UNKNOWN	UNKNOWN	CLAYSTONE																											35		20
CDA282		USGS		Geochemistry of rock samples from the National Geochemical Database: U.S. Geological Survey, Reston, VA.	U.S. Geological Survey	USGS		56.1144	-133.48	0.01				ES	SEDIMENTARY	UNKNOWN	UNKNOWN	CLAYSTONE																							7	1000	5	20	50
CDA598		USGS		Geochemistry of rock samples from the National Geochemical Database: U.S. Geological Survey, Reston, VA.	U.S. Geological Survey	USGS		56.1744	-133.228	0.01				AAS	SEDIMENTARY	UNKNOWN	UNKNOWN	CLAYSTONE																											55		75
CDA598		USGS		Geochemistry of rock samples from the National Geochemical Database: U.S. Geological Survey, Reston, VA.	U.S. Geological Survey	USGS		56.1744	-133.228	0.01				ES	SEDIMENTARY	UNKNOWN	UNKNOWN	CLAYSTONE																							10	1500	20	30	100
CDA635		USGS		Geochemistry of rock samples from the National Geochemical Database: U.S. Geological Survey, Reston, VA.	U.S. Geological Survey	USGS		56.0605	-132.931	0.01				AAS	SEDIMENTARY	UNKNOWN	UNKNOWN	CLAYSTONE																											70		280
CDA635		USGS		Geochemistry of rock samples from the National Geochemical Database: U.S. Geological Survey, Reston, VA.	U.S. Geological Survey	USGS		56.0605	-132.931	0.01				ES	SEDIMENTARY	UNKNOWN	UNKNOWN	CLAYSTONE																							15	1000	50	30	200		500
CDA638		USGS		Geochemistry of rock samples from the National Geochemical Database: U.S. Geological Survey, Reston, VA.	U.S. Geological Survey	USGS		56.1169	-133.02	0.01				AAS	SEDIMENTARY	UNKNOWN	UNKNOWN	CLAYSTONE																											100		230
CDA638		USGS		Geochemistry of rock samples from the National Geochemical Database: U.S. Geological Survey, Reston, VA.	U.S. Geological Survey	USGS		56.1169	-133.02	0.01				ES	SEDIMENTARY	UNKNOWN	UNKNOWN	CLAYSTONE																							10	1000	30	20	200		200		1
CDA652		USGS		Geochemistry of rock samples from the National Geochemical Database: U.S. Geological Survey, Reston, VA.	U.S. Geological Survey	USGS		56.1739	-132.38	0.01				AAS	SEDIMENTARY	UNKNOWN	UNKNOWN	CLAYSTONE																											55		100
CDA652		USGS		Geochemistry of rock samples from the National Geochemical Database: U.S. Geological Survey, Reston, VA.	U.S. Geological Survey	USGS		56.1739	-132.38	0.01				ES	SEDIMENTARY	UNKNOWN	UNKNOWN	CLAYSTONE																							5	300	100	30	70
CDA658		USGS		Geochemistry of rock samples from the National Geochemical Database: U.S. Geological Survey, Reston, VA.	U.S. Geological Survey	USGS		56.2253	-132.605	0.01				AAS	SEDIMENTARY	UNKNOWN	UNKNOWN	CLAYSTONE																											85		80
CDA658		USGS		Geochemistry of rock samples from the National Geochemical Database: U.S. Geological Survey, Reston, VA.	U.S. Geological Survey	USGS		56.2253	-132.605	0.01				ES	SEDIMENTARY	UNKNOWN	UNKNOWN	CLAYSTONE																							7	700	30	30	100
CDE222		USGS		Geochemistry of rock samples from the National Geochemical Database: U.S. Geological Survey, Reston, VA.	U.S. Geological Survey	USGS		56.3267	-133.002	0.01				AAS	SEDIMENTARY	UNKNOWN	UNKNOWN	CLAYSTONE																											30		70
CDE222		USGS		Geochemistry of rock samples from the National Geochemical Database: U.S. Geological Survey, Reston, VA.	U.S. Geological Survey	USGS		56.3267	-133.002	0.01				ES	SEDIMENTARY	UNKNOWN	UNKNOWN	CLAYSTONE																							7	1000	70	30	50
CDE237		USGS		Geochemistry of rock samples from the National Geochemical Database: U.S. Geological Survey, Reston, VA.	U.S. Geological Survey	USGS		56.0097	-134.128	0.01				AAS	SEDIMENTARY	UNKNOWN	UNKNOWN	CLAYSTONE																											80		70
CDE237		USGS		Geochemistry of rock samples from the National Geochemical Database: U.S. Geological Survey, Reston, VA.	U.S. Geological Survey	USGS		56.0097	-134.128	0.01				ES	SEDIMENTARY	UNKNOWN	UNKNOWN	CLAYSTONE																							5	500	30	20	70
CDE238		USGS		Geochemistry of rock samples from the National Geochemical Database: U.S. Geological Survey, Reston, VA.	U.S. Geological Survey	USGS		56.0097	-134.128	0.01				AAS	SEDIMENTARY	UNKNOWN	UNKNOWN	CLAYSTONE																											80		80
CDE238		USGS		Geochemistry of rock samples from the National Geochemical Database: U.S. Geological Survey, Reston, VA.	U.S. Geological Survey	USGS		56.0097	-134.128	0.01				ES	SEDIMENTARY	UNKNOWN	UNKNOWN	CLAYSTONE																							5	500	20	20	70
CDE239		USGS		Geochemistry of rock samples from the National Geochemical Database: U.S. Geological Survey, Reston, VA.	U.S. Geological Survey	USGS		56.0333	-134.115	0.01				AAS	SEDIMENTARY	UNKNOWN	UNKNOWN	CLAYSTONE																											30		100
CDE239		USGS		Geochemistry of rock samples from the National Geochemical Database: U.S. Geological Survey, Reston, VA.	U.S. Geological Survey	USGS		56.0333	-134.115	0.01				ES	SEDIMENTARY	UNKNOWN	UNKNOWN	CLAYSTONE																							2	700	10	15	50
CDE240		USGS		Geochemistry of rock samples from the National Geochemical Database: U.S. Geological Survey, Reston, VA.	U.S. Geological Survey	USGS		56.0333	-134.115	0.01				AAS	SEDIMENTARY	UNKNOWN	UNKNOWN	CLAYSTONE																											20		80
CDE240		USGS		Geochemistry of rock samples from the National Geochemical Database: U.S. Geological Survey, Reston, VA.	U.S. Geological Survey	USGS		56.0333	-134.115	0.01				ES	SEDIMENTARY	UNKNOWN	UNKNOWN	CLAYSTONE																							2	700	10	10	30
CDE244		USGS		Geochemistry of rock samples from the National Geochemical Database: U.S. Geological Survey, Reston, VA.	U.S. Geological Survey	USGS		56.0589	-134.111	0.01				AAS	SEDIMENTARY	UNKNOWN	UNKNOWN	CLAYSTONE																											40		50
CDE244		USGS		Geochemistry of rock samples from the National Geochemical Database: U.S. Geological Survey, Reston, VA.	U.S. Geological Survey	USGS		56.0589	-134.111	0.01				ES	SEDIMENTARY	UNKNOWN	UNKNOWN	CLAYSTONE																							3	700	15	15	50
CDE248		USGS		Geochemistry of rock samples from the National Geochemical Database: U.S. Geological Survey, Reston, VA.	U.S. Geological Survey	USGS		56.0828	-134.147	0.01				AAS	SEDIMENTARY	UNKNOWN	UNKNOWN	CLAYSTONE																											60		120
CDE248		USGS		Geochemistry of rock samples from the National Geochemical Database: U.S. Geological Survey, Reston, VA.	U.S. Geological Survey	USGS		56.0828	-134.147	0.01				ES	SEDIMENTARY	UNKNOWN	UNKNOWN	CLAYSTONE																							3	700	30	15	70
CDE249		USGS		Geochemistry of rock samples from the National Geochemical Database: U.S. Geological Survey, Reston, VA.	U.S. Geological Survey	USGS		56.0828	-134.147	0.01				AAS	SEDIMENTARY	UNKNOWN	UNKNOWN	CLAYSTONE																											50		100
CDE249		USGS		Geochemistry of rock samples from the National Geochemical Database: U.S. Geological Survey, Reston, VA.	U.S. Geological Survey	USGS		56.0828	-134.147	0.01				ES	SEDIMENTARY	UNKNOWN	UNKNOWN	CLAYSTONE																							3	1000	20	15	70
CDE253		USGS		Geochemistry of rock samples from the National Geochemical Database: U.S. Geological Survey, Reston, VA.	U.S. Geological Survey	USGS		56.2392	-134.179	0.01				AAS	SEDIMENTARY	UNKNOWN	UNKNOWN	CLAYSTONE																													30
CDE253		USGS		Geochemistry of rock samples from the National Geochemical Database: U.S. Geological Survey, Reston, VA.	U.S. Geological Survey	USGS		56.2392	-134.179	0.01				ES	SEDIMENTARY	UNKNOWN	UNKNOWN	CLAYSTONE																							3	500	15	15	70
CDE259		USGS		Geochemistry of rock samples from the National Geochemical Database: U.S. Geological Survey, Reston, VA.	U.S. Geological Survey	USGS		56.3125	-134.121	0.01				AAS	SEDIMENTARY	UNKNOWN	UNKNOWN	CLAYSTONE																											30		50
CDE259		USGS		Geochemistry of rock samples from the National Geochemical Database: U.S. Geological Survey, Reston, VA.	U.S. Geological Survey	USGS		56.3125	-134.121	0.01				ES	SEDIMENTARY	UNKNOWN	UNKNOWN	CLAYSTONE																							3	500	20	20	70
CDE261		USGS		Geochemistry of rock samples from the National Geochemical Database: U.S. Geological Survey, Reston, VA.	U.S. Geological Survey	USGS		56.3183	-134.117	0.01				AAS	SEDIMENTARY	UNKNOWN	UNKNOWN	CLAYSTONE																											75		60
CDE261		USGS		Geochemistry of rock samples from the National Geochemical Database: U.S. Geological Survey, Reston, VA.	U.S. Geological Survey	USGS		56.3183	-134.117	0.01				ES	SEDIMENTARY	UNKNOWN	UNKNOWN	CLAYSTONE																							5	700	20	15	70
CDE267		USGS		Geochemistry of rock samples from the National Geochemical Database: U.S. Geological Survey, Reston, VA.	U.S. Geological Survey	USGS		56.29	-133.958	0.01				AAS	SEDIMENTARY	UNKNOWN	UNKNOWN	CLAYSTONE																											35		100
CDE267		USGS		Geochemistry of rock samples from the National Geochemical Database: U.S. Geological Survey, Reston, VA.	U.S. Geological Survey	USGS		56.29	-133.958	0.01				ES	SEDIMENTARY	UNKNOWN	UNKNOWN	CLAYSTONE																							5	500	20	15	70
CDE271		USGS		Geochemistry of rock samples from the National Geochemical Database: U.S. Geological Survey, Reston, VA.	U.S. Geological Survey	USGS		56.2875	-133.986	0.01				AAS	SEDIMENTARY	UNKNOWN	UNKNOWN	CLAYSTONE																											40		75
CDE271		USGS		Geochemistry of rock samples from the National Geochemical Database: U.S. Geological Survey, Reston, VA.	U.S. Geological Survey	USGS		56.2875	-133.986	0.01				ES	SEDIMENTARY	UNKNOWN	UNKNOWN	CLAYSTONE																							2	700	15	15	50
CDE279		USGS		Geochemistry of rock samples from the National Geochemical Database: U.S. Geological Survey, Reston, VA.	U.S. Geological Survey	USGS		56.3417	-133.946	0.01				AAS	SEDIMENTARY	UNKNOWN	UNKNOWN	CLAYSTONE																											30		55
CDE279		USGS		Geochemistry of rock samples from the National Geochemical Database: U.S. Geological Survey, Reston, VA.	U.S. Geological Survey	USGS		56.3417	-133.946	0.01				ES	SEDIMENTARY	UNKNOWN	UNKNOWN	CLAYSTONE																							3	300	20	15	70
CDE287		USGS		Geochemistry of rock samples from the National Geochemical Database: U.S. Geological Survey, Reston, VA.	U.S. Geological Survey	USGS		56.3397	-133.978	0.01				AAS	SEDIMENTARY	UNKNOWN	UNKNOWN	CLAYSTONE																											55		80
CDE287		USGS		Geochemistry of rock samples from the National Geochemical Database: U.S. Geological Survey, Reston, VA.	U.S. Geological Survey	USGS		56.3397	-133.978	0.01				ES	SEDIMENTARY	UNKNOWN	UNKNOWN	CLAYSTONE																							3	300	15	20	70
CDE291		USGS		Geochemistry of rock samples from the National Geochemical Database: U.S. Geological Survey, Reston, VA.	U.S. Geological Survey	USGS		56.3294	-133.972	0.01				AAS	SEDIMENTARY	UNKNOWN	UNKNOWN	CLAYSTONE																											50		85
CDE291		USGS		Geochemistry of rock samples from the National Geochemical Database: U.S. Geological Survey, Reston, VA.	U.S. Geological Survey	USGS		56.3294	-133.972	0.01				ES	SEDIMENTARY	UNKNOWN	UNKNOWN	CLAYSTONE																							5	700	15	15	70
CDE294		USGS		Geochemistry of rock samples from the National Geochemical Database: U.S. Geological Survey, Reston, VA.	U.S. Geological Survey	USGS		56.31	-133.991	0.01				AAS	SEDIMENTARY	UNKNOWN	UNKNOWN	CLAYSTONE																											50		80
CDE294		USGS		Geochemistry of rock samples from the National Geochemical Database: U.S. Geological Survey, Reston, VA.	U.S. Geological Survey	USGS		56.31	-133.991	0.01				ES	SEDIMENTARY	UNKNOWN	UNKNOWN	CLAYSTONE																							3	500	5	10	50
CDE396		USGS		Geochemistry of rock samples from the National Geochemical Database: U.S. Geological Survey, Reston, VA.	U.S. Geological Survey	USGS		56.5122	-133.125	0.01				AAS	SEDIMENTARY	UNKNOWN	UNKNOWN	CLAYSTONE																											5		190
CDE396		USGS		Geochemistry of rock samples from the National Geochemical Database: U.S. Geological Survey, Reston, VA.	U.S. Geological Survey	USGS		56.5122	-133.125	0.01				COL	SEDIMENTARY	UNKNOWN	UNKNOWN	CLAYSTONE
CDE396		USGS		Geochemistry of rock samples from the National Geochemical Database: U.S. Geological Survey, Reston, VA.	U.S. Geological Survey	USGS		56.5122	-133.125	0.01				ES	SEDIMENTARY	UNKNOWN	UNKNOWN	CLAYSTONE																							1	50	5	5
CDH662		USGS		Geochemistry of rock samples from the National Geochemical Database: U.S. Geological Survey, Reston, VA.	U.S. Geological Survey	USGS		56.3444	-132.739	0.01				AAS	SEDIMENTARY	UNKNOWN	UNKNOWN	CLAYSTONE																											30		100
CDH662		USGS		Geochemistry of rock samples from the National Geochemical Database: U.S. Geological Survey, Reston, VA.	U.S. Geological Survey	USGS		56.3444	-132.739	0.01				ES	SEDIMENTARY	UNKNOWN	UNKNOWN	CLAYSTONE																							5	700	50	30	50
CDH663		USGS		Geochemistry of rock samples from the National Geochemical Database: U.S. Geological Survey, Reston, VA.	U.S. Geological Survey	USGS		56.7542	-133.22	0.01				AAS	SEDIMENTARY	UNKNOWN	UNKNOWN	CLAYSTONE																											35		55
CDH663		USGS		Geochemistry of rock samples from the National Geochemical Database: U.S. Geological Survey, Reston, VA.	U.S. Geological Survey	USGS		56.7542	-133.22	0.01				ES	SEDIMENTARY	UNKNOWN	UNKNOWN	CLAYSTONE																							5	5000	20	15	50
CDH664		USGS		Geochemistry of rock samples from the National Geochemical Database: U.S. Geological Survey, Reston, VA.	U.S. Geological Survey	USGS		56.7542	-133.22	0.01				AAS	SEDIMENTARY	UNKNOWN	UNKNOWN	CLAYSTONE																											65		70
CDH664		USGS		Geochemistry of rock samples from the National Geochemical Database: U.S. Geological Survey, Reston, VA.	U.S. Geological Survey	USGS		56.7542	-133.22	0.01				ES	SEDIMENTARY	UNKNOWN	UNKNOWN	CLAYSTONE																							5	1000	30	30	100
CDH678		USGS		Geochemistry of rock samples from the National Geochemical Database: U.S. Geological Survey, Reston, VA.	U.S. Geological Survey	USGS		56.3825	-133.885	0.01				AAS	SEDIMENTARY	UNKNOWN	UNKNOWN	CLAYSTONE																											30		35
CDH678		USGS		Geochemistry of rock samples from the National Geochemical Database: U.S. Geological Survey, Reston, VA.	U.S. Geological Survey	USGS		56.3825	-133.885	0.01				ES	SEDIMENTARY	UNKNOWN	UNKNOWN	CLAYSTONE																							5	1000	20	30	50
CDP416		USGS		Geochemistry of rock samples from the National Geochemical Database: U.S. Geological Survey, Reston, VA.	U.S. Geological Survey	USGS		59.1036	-135.337	0.01				AAS	SEDIMENTARY	UNKNOWN	UNKNOWN	CLAYSTONE																													100	10
CDP416		USGS		Geochemistry of rock samples from the National Geochemical Database: U.S. Geological Survey, Reston, VA.	U.S. Geological Survey	USGS		59.1036	-135.337	0.01				ES	SEDIMENTARY	UNKNOWN	UNKNOWN	CLAYSTONE																							7	2000	30	30	300
CEG023		USGS		Geochemistry of rock samples from the National Geochemical Database: U.S. Geological Survey, Reston, VA.	U.S. Geological Survey	USGS		57.0278	-133.768	0.01				AAS	SEDIMENTARY	UNKNOWN	UNKNOWN	CLAYSTONE																											50		140
CEG023		USGS		Geochemistry of rock samples from the National Geochemical Database: U.S. Geological Survey, Reston, VA.	U.S. Geological Survey	USGS		57.0278	-133.768	0.01				ES	SEDIMENTARY	UNKNOWN	UNKNOWN	CLAYSTONE																							2	1500	5	5	20
CEG024		USGS		Geochemistry of rock samples from the National Geochemical Database: U.S. Geological Survey, Reston, VA.	U.S. Geological Survey	USGS		56.9078	-133.745	0.01				AAS	SEDIMENTARY	UNKNOWN	UNKNOWN	CLAYSTONE																											20		55
CEG024		USGS		Geochemistry of rock samples from the National Geochemical Database: U.S. Geological Survey, Reston, VA.	U.S. Geological Survey	USGS		56.9078	-133.745	0.01				ES	SEDIMENTARY	UNKNOWN	UNKNOWN	CLAYSTONE																							3	500	7	5	30
CEG060		USGS		Geochemistry of rock samples from the National Geochemical Database: U.S. Geological Survey, Reston, VA.	U.S. Geological Survey	USGS		56.5322	-133.157	0.01				AAS	SEDIMENTARY	UNKNOWN	UNKNOWN	CLAYSTONE																											80		120
CEG060		USGS		Geochemistry of rock samples from the National Geochemical Database: U.S. Geological Survey, Reston, VA.	U.S. Geological Survey	USGS		56.5322	-133.157	0.01				ES	SEDIMENTARY	UNKNOWN	UNKNOWN	CLAYSTONE																							5	700	50	30	100
CEG103		USGS		Geochemistry of rock samples from the National Geochemical Database: U.S. Geological Survey, Reston, VA.	U.S. Geological Survey	USGS		56.9497	-133.888	0.01				AAS	SEDIMENTARY	UNKNOWN	UNKNOWN	CLAYSTONE																											85		10
CEG103		USGS		Geochemistry of rock samples from the National Geochemical Database: U.S. Geological Survey, Reston, VA.	U.S. Geological Survey	USGS		56.9497	-133.888	0.01				ES	SEDIMENTARY	UNKNOWN	UNKNOWN	CLAYSTONE																							1.5	1000	7		50
CEG106		USGS		Geochemistry of rock samples from the National Geochemical Database: U.S. Geological Survey, Reston, VA.	U.S. Geological Survey	USGS		56.9505	-133.871	0.01				AAS	SEDIMENTARY	UNKNOWN	UNKNOWN	CLAYSTONE																											130		75
CEG106		USGS		Geochemistry of rock samples from the National Geochemical Database: U.S. Geological Survey, Reston, VA.	U.S. Geological Survey	USGS		56.9505	-133.871	0.01				ES	SEDIMENTARY	UNKNOWN	UNKNOWN	CLAYSTONE																							7	2000	15	30	150
CEG108		USGS		Geochemistry of rock samples from the National Geochemical Database: U.S. Geological Survey, Reston, VA.	U.S. Geological Survey	USGS		56.9464	-133.836	0.01				AAS	SEDIMENTARY	UNKNOWN	UNKNOWN	CLAYSTONE																											50		65
CEG108		USGS		Geochemistry of rock samples from the National Geochemical Database: U.S. Geological Survey, Reston, VA.	U.S. Geological Survey	USGS		56.9464	-133.836	0.01				ES	SEDIMENTARY	UNKNOWN	UNKNOWN	CLAYSTONE																							3	1000	15	10	30
CEG909		USGS		Geochemistry of rock samples from the National Geochemical Database: U.S. Geological Survey, Reston, VA.	U.S. Geological Survey	USGS		56.85	-134.143	0.01				AAS	SEDIMENTARY	UNKNOWN	UNKNOWN	CLAYSTONE																											15		40
CEG909		USGS		Geochemistry of rock samples from the National Geochemical Database: U.S. Geological Survey, Reston, VA.	U.S. Geological Survey	USGS		56.85	-134.143	0.01				ES	SEDIMENTARY	UNKNOWN	UNKNOWN	CLAYSTONE																							20	50	30		20
CEG924		USGS		Geochemistry of rock samples from the National Geochemical Database: U.S. Geological Survey, Reston, VA.	U.S. Geological Survey	USGS		56.8805	-134.149	0.01				AAS	SEDIMENTARY	UNKNOWN	UNKNOWN	CLAYSTONE																											15		120
CEG924		USGS		Geochemistry of rock samples from the National Geochemical Database: U.S. Geological Survey, Reston, VA.	U.S. Geological Survey	USGS		56.8805	-134.149	0.01				ES	SEDIMENTARY	UNKNOWN	UNKNOWN	CLAYSTONE																							2	500	70	20	15		200
CER558		USGS		Geochemistry of rock samples from the National Geochemical Database: U.S. Geological Survey, Reston, VA.	U.S. Geological Survey	USGS		56.0586	-133.061	0.01				AAS	SEDIMENTARY	UNKNOWN	UNKNOWN	CLAYSTONE																											40		80
CER558		USGS		Geochemistry of rock samples from the National Geochemical Database: U.S. Geological Survey, Reston, VA.	U.S. Geological Survey	USGS		56.0586	-133.061	0.01				ES	SEDIMENTARY	UNKNOWN	UNKNOWN	CLAYSTONE																							3	1000	15	15	30
CFC287		USGS		Geochemistry of rock samples from the National Geochemical Database: U.S. Geological Survey, Reston, VA.	U.S. Geological Survey	USGS		67.875	-161.672	0.01				AAS	SEDIMENTARY	UNKNOWN	UNKNOWN	CLAYSTONE																													65
CFC287		USGS		Geochemistry of rock samples from the National Geochemical Database: U.S. Geological Survey, Reston, VA.	U.S. Geological Survey	USGS		67.875	-161.672	0.01				ES	SEDIMENTARY	UNKNOWN	UNKNOWN	CLAYSTONE																							5	700	70	70	100
CFJ336		USGS		Geochemistry of rock samples from the National Geochemical Database: U.S. Geological Survey, Reston, VA.	U.S. Geological Survey	USGS		56.8767	-134.275	0.01				AAS	SEDIMENTARY	UNKNOWN	UNKNOWN	CLAYSTONE																											90		85
CFJ336		USGS		Geochemistry of rock samples from the National Geochemical Database: U.S. Geological Survey, Reston, VA.	U.S. Geological Survey	USGS		56.8767	-134.275	0.01				ES	SEDIMENTARY	UNKNOWN	UNKNOWN	CLAYSTONE																							3	700	15	20	70
CFJ340		USGS		Geochemistry of rock samples from the National Geochemical Database: U.S. Geological Survey, Reston, VA.	U.S. Geological Survey	USGS		56.8753	-134.294	0.01				AAS	SEDIMENTARY	UNKNOWN	UNKNOWN	CLAYSTONE																											75		110
CFJ340		USGS		Geochemistry of rock samples from the National Geochemical Database: U.S. Geological Survey, Reston, VA.	U.S. Geological Survey	USGS		56.8753	-134.294	0.01				ES	SEDIMENTARY	UNKNOWN	UNKNOWN	CLAYSTONE																							3	700	15	15	70
CFJ342		USGS		Geochemistry of rock samples from the National Geochemical Database: U.S. Geological Survey, Reston, VA.	U.S. Geological Survey	USGS		56.8553	-134.283	0.01				AAS	SEDIMENTARY	UNKNOWN	UNKNOWN	CLAYSTONE																											90		55
CFJ342		USGS		Geochemistry of rock samples from the National Geochemical Database: U.S. Geological Survey, Reston, VA.	U.S. Geological Survey	USGS		56.8553	-134.283	0.01				ES	SEDIMENTARY	UNKNOWN	UNKNOWN	CLAYSTONE																							5	500	30	20	100				0.5
CFJ641		USGS		Geochemistry of rock samples from the National Geochemical Database: U.S. Geological Survey, Reston, VA.	U.S. Geological Survey	USGS		56.4706	-132.338	0.01				AAS	SEDIMENTARY	UNKNOWN	UNKNOWN	CLAYSTONE																											15		110
CFJ641		USGS		Geochemistry of rock samples from the National Geochemical Database: U.S. Geological Survey, Reston, VA.	U.S. Geological Survey	USGS		56.4706	-132.338	0.01				ES	SEDIMENTARY	UNKNOWN	UNKNOWN	CLAYSTONE																							10	3000	7	30	30		300
CFJ710		USGS		Geochemistry of rock samples from the National Geochemical Database: U.S. Geological Survey, Reston, VA.	U.S. Geological Survey	USGS		56.8472	-134.244	0.01				AAS	SEDIMENTARY	UNKNOWN	UNKNOWN	CLAYSTONE																											110		100
CFJ710		USGS		Geochemistry of rock samples from the National Geochemical Database: U.S. Geological Survey, Reston, VA.	U.S. Geological Survey	USGS		56.8472	-134.244	0.01				ES	SEDIMENTARY	UNKNOWN	UNKNOWN	CLAYSTONE																							2	500	20	15	150
CFJ718		USGS		Geochemistry of rock samples from the National Geochemical Database: U.S. Geological Survey, Reston, VA.	U.S. Geological Survey	USGS		56.8355	-134.248	0.01				AAS	SEDIMENTARY	UNKNOWN	UNKNOWN	CLAYSTONE																											15		15
CFJ718		USGS		Geochemistry of rock samples from the National Geochemical Database: U.S. Geological Survey, Reston, VA.	U.S. Geological Survey	USGS		56.8355	-134.248	0.01				ES	SEDIMENTARY	UNKNOWN	UNKNOWN	CLAYSTONE																							0.7	300		5	10
CFJ720		USGS		Geochemistry of rock samples from the National Geochemical Database: U.S. Geological Survey, Reston, VA.	U.S. Geological Survey	USGS		56.8347	-134.255	0.01				AAS	SEDIMENTARY	UNKNOWN	UNKNOWN	CLAYSTONE																											25		20
CFJ720		USGS		Geochemistry of rock samples from the National Geochemical Database: U.S. Geological Survey, Reston, VA.	U.S. Geological Survey	USGS		56.8347	-134.255	0.01				ES	SEDIMENTARY	UNKNOWN	UNKNOWN	CLAYSTONE																							3	700	10	15	20
CFK660		USGS		Geochemistry of rock samples from the National Geochemical Database: U.S. Geological Survey, Reston, VA.	U.S. Geological Survey	USGS		58.3028	-135.017	0.01				AAS	SEDIMENTARY	UNKNOWN	UNKNOWN	CLAYSTONE																												0.3	95
CFK660		USGS		Geochemistry of rock samples from the National Geochemical Database: U.S. Geological Survey, Reston, VA.	U.S. Geological Survey	USGS		58.3028	-135.017	0.01				ES	SEDIMENTARY	UNKNOWN	UNKNOWN	CLAYSTONE																							3	500	30	20	70
CFK662		USGS		Geochemistry of rock samples from the National Geochemical Database: U.S. Geological Survey, Reston, VA.	U.S. Geological Survey	USGS		58.3067	-135.042	0.01				AAS	SEDIMENTARY	UNKNOWN	UNKNOWN	CLAYSTONE																												0.6	100
CFK662		USGS		Geochemistry of rock samples from the National Geochemical Database: U.S. Geological Survey, Reston, VA.	U.S. Geological Survey	USGS		58.3067	-135.042	0.01				ES	SEDIMENTARY	UNKNOWN	UNKNOWN	CLAYSTONE																							5	500	50	20	70
CFK665		USGS		Geochemistry of rock samples from the National Geochemical Database: U.S. Geological Survey, Reston, VA.	U.S. Geological Survey	USGS		58.2133	-135.587	0.01				AAS	SEDIMENTARY	UNKNOWN	UNKNOWN	CLAYSTONE																													5
CFK665		USGS		Geochemistry of rock samples from the National Geochemical Database: U.S. Geological Survey, Reston, VA.	U.S. Geological Survey	USGS		58.2133	-135.587	0.01				ES	SEDIMENTARY	UNKNOWN	UNKNOWN	CLAYSTONE																							3	1000	20	20	150
CFL904		USGS		Geochemistry of rock samples from the National Geochemical Database: U.S. Geological Survey, Reston, VA.	U.S. Geological Survey	USGS		59.0819	-135.306	0.01				AAS	SEDIMENTARY	UNKNOWN	UNKNOWN	CLAYSTONE																													25	80
CFL904		USGS		Geochemistry of rock samples from the National Geochemical Database: U.S. Geological Survey, Reston, VA.	U.S. Geological Survey	USGS		59.0819	-135.306	0.01				ES	SEDIMENTARY	UNKNOWN	UNKNOWN	CLAYSTONE																								700	5		15		200
CFL905		USGS		Geochemistry of rock samples from the National Geochemical Database: U.S. Geological Survey, Reston, VA.	U.S. Geological Survey	USGS		59.0883	-135.296	0.01				AAS	SEDIMENTARY	UNKNOWN	UNKNOWN	CLAYSTONE																													90
CFL905		USGS		Geochemistry of rock samples from the National Geochemical Database: U.S. Geological Survey, Reston, VA.	U.S. Geological Survey	USGS		59.0883	-135.296	0.01				ES	SEDIMENTARY	UNKNOWN	UNKNOWN	CLAYSTONE																							10	2000	70	70	200		200
CFL907		USGS		Geochemistry of rock samples from the National Geochemical Database: U.S. Geological Survey, Reston, VA.	U.S. Geological Survey	USGS		59.1486	-135.344	0.01				AAS	SEDIMENTARY	UNKNOWN	UNKNOWN	CLAYSTONE																													75
CFL907		USGS		Geochemistry of rock samples from the National Geochemical Database: U.S. Geological Survey, Reston, VA.	U.S. Geological Survey	USGS		59.1486	-135.344	0.01				ES	SEDIMENTARY	UNKNOWN	UNKNOWN	CLAYSTONE																							7	2000	50	70	500
CFT016		USGS		Geochemistry of rock samples from the National Geochemical Database: U.S. Geological Survey, Reston, VA.	U.S. Geological Survey	USGS		58.5203	-135.028	0.01				AAS	SEDIMENTARY	UNKNOWN	UNKNOWN	CLAYSTONE																												0.6	55
CFT016		USGS		Geochemistry of rock samples from the National Geochemical Database: U.S. Geological Survey, Reston, VA.	U.S. Geological Survey	USGS		58.5203	-135.028	0.01				ES	SEDIMENTARY	UNKNOWN	UNKNOWN	CLAYSTONE																							1	200	10		10
CFV309		USGS		Geochemistry of rock samples from the National Geochemical Database: U.S. Geological Survey, Reston, VA.	U.S. Geological Survey	USGS		58.0731	-133.888	0.01				AAS	SEDIMENTARY	UNKNOWN	UNKNOWN	CLAYSTONE																												0.1	140
CFV309		USGS		Geochemistry of rock samples from the National Geochemical Database: U.S. Geological Survey, Reston, VA.	U.S. Geological Survey	USGS		58.0731	-133.888	0.01				ES	SEDIMENTARY	UNKNOWN	UNKNOWN	CLAYSTONE																							20	1000	200	100	150		200
CFV849		USGS		Geochemistry of rock samples from the National Geochemical Database: U.S. Geological Survey, Reston, VA.	U.S. Geological Survey	USGS		58.7931	-134.992	0.01				AAS	SEDIMENTARY	UNKNOWN	UNKNOWN	CLAYSTONE																													75
CFV849		USGS		Geochemistry of rock samples from the National Geochemical Database: U.S. Geological Survey, Reston, VA.	U.S. Geological Survey	USGS		58.7931	-134.992	0.01				ES	SEDIMENTARY	UNKNOWN	UNKNOWN	CLAYSTONE																							7	700	50	20	50
CFV851		USGS		Geochemistry of rock samples from the National Geochemical Database: U.S. Geological Survey, Reston, VA.	U.S. Geological Survey	USGS		58.7833	-135.014	0.01				AAS	SEDIMENTARY	UNKNOWN	UNKNOWN	CLAYSTONE																													140
CFV851		USGS		Geochemistry of rock samples from the National Geochemical Database: U.S. Geological Survey, Reston, VA.	U.S. Geological Survey	USGS		58.7833	-135.014	0.01				ES	SEDIMENTARY	UNKNOWN	UNKNOWN	CLAYSTONE																							15	1000	150	50	200		200
CGF680		USGS		Geochemistry of rock samples from the National Geochemical Database: U.S. Geological Survey, Reston, VA.	U.S. Geological Survey	USGS		65.6758	-146.932	0.01				AAS	SEDIMENTARY	UNKNOWN	UNKNOWN	CLAYSTONE																												0.1	110	20
CGF680		USGS		Geochemistry of rock samples from the National Geochemical Database: U.S. Geological Survey, Reston, VA.	U.S. Geological Survey	USGS		65.6758	-146.932	0.01				ES	SEDIMENTARY	UNKNOWN	UNKNOWN	CLAYSTONE																							5	50	50	15	150				0.5
CGF715		USGS		Geochemistry of rock samples from the National Geochemical Database: U.S. Geological Survey, Reston, VA.	U.S. Geological Survey	USGS		65.6322	-147.794	0.01				AAS	SEDIMENTARY	UNKNOWN	UNKNOWN	CLAYSTONE																												0.1	100	10
CGF715		USGS		Geochemistry of rock samples from the National Geochemical Database: U.S. Geological Survey, Reston, VA.	U.S. Geological Survey	USGS		65.6322	-147.794	0.01				ES	SEDIMENTARY	UNKNOWN	UNKNOWN	CLAYSTONE																							2	500	10		15
CGF760		USGS		Geochemistry of rock samples from the National Geochemical Database: U.S. Geological Survey, Reston, VA.	U.S. Geological Survey	USGS		65.8078	-147.078	0.01				AAS	SEDIMENTARY	UNKNOWN	UNKNOWN	CLAYSTONE																												0.2	85	10
CGF760		USGS		Geochemistry of rock samples from the National Geochemical Database: U.S. Geological Survey, Reston, VA.	U.S. Geological Survey	USGS		65.8078	-147.078	0.01				ES	SEDIMENTARY	UNKNOWN	UNKNOWN	CLAYSTONE																							5	300	100	20	50
CGY767		USGS		Geochemistry of rock samples from the National Geochemical Database: U.S. Geological Survey, Reston, VA.	U.S. Geological Survey	USGS		58.7011	-135.273	0.01				AAS	SEDIMENTARY	UNKNOWN	UNKNOWN	CLAYSTONE																												0.1	65
CGY767		USGS		Geochemistry of rock samples from the National Geochemical Database: U.S. Geological Survey, Reston, VA.	U.S. Geological Survey	USGS		58.7011	-135.273	0.01				ES	SEDIMENTARY	UNKNOWN	UNKNOWN	CLAYSTONE																							5	1500	7	15	30
CGY833		USGS		Geochemistry of rock samples from the National Geochemical Database: U.S. Geological Survey, Reston, VA.	U.S. Geological Survey	USGS		58.8133	-135.378	0.01				AAS	SEDIMENTARY	UNKNOWN	UNKNOWN	CLAYSTONE																													5	20
CGY833		USGS		Geochemistry of rock samples from the National Geochemical Database: U.S. Geological Survey, Reston, VA.	U.S. Geological Survey	USGS		58.8133	-135.378	0.01				ES	SEDIMENTARY	UNKNOWN	UNKNOWN	CLAYSTONE																							1.5	30	7		30
CGZ066		USGS		Geochemistry of rock samples from the National Geochemical Database: U.S. Geological Survey, Reston, VA.	U.S. Geological Survey	USGS		58.7386	-135.345	0.01				AAS	SEDIMENTARY	UNKNOWN	UNKNOWN	CLAYSTONE																												0.1	110
CGZ066		USGS		Geochemistry of rock samples from the National Geochemical Database: U.S. Geological Survey, Reston, VA.	U.S. Geological Survey	USGS		58.7386	-135.345	0.01				ES	SEDIMENTARY	UNKNOWN	UNKNOWN	CLAYSTONE																							5	700	70	20	100
CHG188		USGS		Geochemistry of rock samples from the National Geochemical Database: U.S. Geological Survey, Reston, VA.	U.S. Geological Survey	USGS		55.3217	-160.51	0.01				AAS	SEDIMENTARY	UNKNOWN	UNKNOWN	CLAYSTONE																													20	500
CHG188		USGS		Geochemistry of rock samples from the National Geochemical Database: U.S. Geological Survey, Reston, VA.	U.S. Geological Survey	USGS		55.3217	-160.51	0.01				ES	SEDIMENTARY	UNKNOWN	UNKNOWN	CLAYSTONE																							5	200	5	10	50			500
CHG600		USGS		Geochemistry of rock samples from the National Geochemical Database: U.S. Geological Survey, Reston, VA.	U.S. Geological Survey	USGS		55.1672	-160.631	0.01				AAS	SEDIMENTARY	UNKNOWN	UNKNOWN	CLAYSTONE																													45	30
CHG600		USGS		Geochemistry of rock samples from the National Geochemical Database: U.S. Geological Survey, Reston, VA.	U.S. Geological Survey	USGS		55.1672	-160.631	0.01				ES	SEDIMENTARY	UNKNOWN	UNKNOWN	CLAYSTONE																							7	5000	10
CHW927		USGS		Geochemistry of rock samples from the National Geochemical Database: U.S. Geological Survey, Reston, VA.	U.S. Geological Survey	USGS		65.5045	-148.503	0.01				AAS	SEDIMENTARY	UNKNOWN	UNKNOWN	CLAYSTONE																												0.4	125	500
CHW927		USGS		Geochemistry of rock samples from the National Geochemical Database: U.S. Geological Survey, Reston, VA.	U.S. Geological Survey	USGS		65.5045	-148.503	0.01				ES	SEDIMENTARY	UNKNOWN	UNKNOWN	CLAYSTONE																							5	200	30		15				0.5
CHW937		USGS		Geochemistry of rock samples from the National Geochemical Database: U.S. Geological Survey, Reston, VA.	U.S. Geological Survey	USGS		65.5108	-148.539	0.01				AAS	SEDIMENTARY	UNKNOWN	UNKNOWN	CLAYSTONE																												10	1000	1800
CHW937		USGS		Geochemistry of rock samples from the National Geochemical Database: U.S. Geological Survey, Reston, VA.	U.S. Geological Survey	USGS		65.5108	-148.539	0.01				ES	SEDIMENTARY	UNKNOWN	UNKNOWN	CLAYSTONE																							7	700	100	20	100		2000	3000	1
CHY590		USGS		Geochemistry of rock samples from the National Geochemical Database: U.S. Geological Survey, Reston, VA.	U.S. Geological Survey	USGS		65.4522	-149.864	0.01				AAS	SEDIMENTARY	UNKNOWN	UNKNOWN	CLAYSTONE																													170
CHY590		USGS		Geochemistry of rock samples from the National Geochemical Database: U.S. Geological Survey, Reston, VA.	U.S. Geological Survey	USGS		65.4522	-149.864	0.01				ES	SEDIMENTARY	UNKNOWN	UNKNOWN	CLAYSTONE																							7	1000	20	15	70		200
CHY591		USGS		Geochemistry of rock samples from the National Geochemical Database: U.S. Geological Survey, Reston, VA.	U.S. Geological Survey	USGS		65.4661	-149.819	0.01				AAS	SEDIMENTARY	UNKNOWN	UNKNOWN	CLAYSTONE																													75
CHY591		USGS		Geochemistry of rock samples from the National Geochemical Database: U.S. Geological Survey, Reston, VA.	U.S. Geological Survey	USGS		65.4661	-149.819	0.01				ES	SEDIMENTARY	UNKNOWN	UNKNOWN	CLAYSTONE																							5	100	10		20
CHY595		USGS		Geochemistry of rock samples from the National Geochemical Database: U.S. Geological Survey, Reston, VA.	U.S. Geological Survey	USGS		65.9086	-147.756	0.01				AAS	SEDIMENTARY	UNKNOWN	UNKNOWN	CLAYSTONE																												0.1	55
CHY595		USGS		Geochemistry of rock samples from the National Geochemical Database: U.S. Geological Survey, Reston, VA.	U.S. Geological Survey	USGS		65.9086	-147.756	0.01				ES	SEDIMENTARY	UNKNOWN	UNKNOWN	CLAYSTONE																							0.5	20	5	20	20
CHY596		USGS		Geochemistry of rock samples from the National Geochemical Database: U.S. Geological Survey, Reston, VA.	U.S. Geological Survey	USGS		65.9086	-147.756	0.01				AAS	SEDIMENTARY	UNKNOWN	UNKNOWN	CLAYSTONE																													650
CHY596		USGS		Geochemistry of rock samples from the National Geochemical Database: U.S. Geological Survey, Reston, VA.	U.S. Geological Survey	USGS		65.9086	-147.756	0.01				ES	SEDIMENTARY	UNKNOWN	UNKNOWN	CLAYSTONE																							7	20	30		50		1000
CHY597		USGS		Geochemistry of rock samples from the National Geochemical Database: U.S. Geological Survey, Reston, VA.	U.S. Geological Survey	USGS		65.9086	-147.756	0.01				AAS	SEDIMENTARY	UNKNOWN	UNKNOWN	CLAYSTONE																													15	20
CHY597		USGS		Geochemistry of rock samples from the National Geochemical Database: U.S. Geological Survey, Reston, VA.	U.S. Geological Survey	USGS		65.9086	-147.756	0.01				ES	SEDIMENTARY	UNKNOWN	UNKNOWN	CLAYSTONE																							5	10	5		50				0.5
CHY671		USGS		Geochemistry of rock samples from the National Geochemical Database: U.S. Geological Survey, Reston, VA.	U.S. Geological Survey	USGS		65.4339	-149.921	0.01				AAS	SEDIMENTARY	UNKNOWN	UNKNOWN	CLAYSTONE																												0.1	100
CHY671		USGS		Geochemistry of rock samples from the National Geochemical Database: U.S. Geological Survey, Reston, VA.	U.S. Geological Survey	USGS		65.4339	-149.921	0.01				ES	SEDIMENTARY	UNKNOWN	UNKNOWN	CLAYSTONE																							5	300	50	15	50		200
D119647		USGS		Geochemistry of rock samples from the National Geochemical Database: U.S. Geological Survey, Reston, VA.	U.S. Geological Survey	USGS		45	-113.133	0.01	68	68	68	UNKNOWN	SEDIMENTARY	UNKNOWN	UNKNOWN	CLAYSTONE																								50	150		200				30
D119742		USGS		Geochemistry of rock samples from the National Geochemical Database: U.S. Geological Survey, Reston, VA.	U.S. Geological Survey	USGS		68.625	-158.375	0.01	56	56	56	COL	SEDIMENTARY	UNKNOWN	UNKNOWN	CLAYSTONE
D119744		USGS		Geochemistry of rock samples from the National Geochemical Database: U.S. Geological Survey, Reston, VA.	U.S. Geological Survey	USGS		68.625	-158.375	0.01	56	56	56	COL	SEDIMENTARY	UNKNOWN	UNKNOWN	CLAYSTONE																															0.1
D119742		USGS		Geochemistry of rock samples from the National Geochemical Database: U.S. Geological Survey, Reston, VA.	U.S. Geological Survey	USGS		68.625	-158.375	0.01	56	56	56	AAS	SEDIMENTARY	UNKNOWN	UNKNOWN	CLAYSTONE
D119742		USGS		Geochemistry of rock samples from the National Geochemical Database: U.S. Geological Survey, Reston, VA.	U.S. Geological Survey	USGS		68.625	-158.375	0.01	56	56	56	ES	SEDIMENTARY	UNKNOWN	UNKNOWN	CLAYSTONE																							7	5000	70	20	200				1
D119744		USGS		Geochemistry of rock samples from the National Geochemical Database: U.S. Geological Survey, Reston, VA.	U.S. Geological Survey	USGS		68.625	-158.375	0.01	56	56	56	AAS	SEDIMENTARY	UNKNOWN	UNKNOWN	CLAYSTONE
D119744		USGS		Geochemistry of rock samples from the National Geochemical Database: U.S. Geological Survey, Reston, VA.	U.S. Geological Survey	USGS		68.625	-158.375	0.01	56	56	56	ES	SEDIMENTARY	UNKNOWN	UNKNOWN	CLAYSTONE																							3	100	50	10	70
D119745		USGS		Geochemistry of rock samples from the National Geochemical Database: U.S. Geological Survey, Reston, VA.	U.S. Geological Survey	USGS		68.625	-158.375	0.01	59	59	59	ES	SEDIMENTARY	UNKNOWN	UNKNOWN	CLAYSTONE																							1.5	500	70	15	100
D119746		USGS		Geochemistry of rock samples from the National Geochemical Database: U.S. Geological Survey, Reston, VA.	U.S. Geological Survey	USGS		68.5083	-156.625	0.01				AAS	SEDIMENTARY	UNKNOWN	UNKNOWN	CLAYSTONE
D119746		USGS		Geochemistry of rock samples from the National Geochemical Database: U.S. Geological Survey, Reston, VA.	U.S. Geological Survey	USGS		68.5083	-156.625	0.01				COL	SEDIMENTARY	UNKNOWN	UNKNOWN	CLAYSTONE																															0.75
D119746		USGS		Geochemistry of rock samples from the National Geochemical Database: U.S. Geological Survey, Reston, VA.	U.S. Geological Survey	USGS		68.5083	-156.625	0.01				ES	SEDIMENTARY	UNKNOWN	UNKNOWN	CLAYSTONE																							2	200	70		100				2
D119754		USGS		Geochemistry of rock samples from the National Geochemical Database: U.S. Geological Survey, Reston, VA.	U.S. Geological Survey	USGS		68.625	-158.75	0.01	56	56	56	AAS	SEDIMENTARY	UNKNOWN	UNKNOWN	CLAYSTONE
D119754		USGS		Geochemistry of rock samples from the National Geochemical Database: U.S. Geological Survey, Reston, VA.	U.S. Geological Survey	USGS		68.625	-158.75	0.01	56	56	56	ES	SEDIMENTARY	UNKNOWN	UNKNOWN	CLAYSTONE																							3	300	100	30	100
D119756		USGS		Geochemistry of rock samples from the National Geochemical Database: U.S. Geological Survey, Reston, VA.	U.S. Geological Survey	USGS		68.625	-158.75	0.01	56	56	56	AAS	SEDIMENTARY	UNKNOWN	UNKNOWN	CLAYSTONE
D119756		USGS		Geochemistry of rock samples from the National Geochemical Database: U.S. Geological Survey, Reston, VA.	U.S. Geological Survey	USGS		68.625	-158.75	0.01	56	56	56	COL	SEDIMENTARY	UNKNOWN	UNKNOWN	CLAYSTONE																															0.01
D119756		USGS		Geochemistry of rock samples from the National Geochemical Database: U.S. Geological Survey, Reston, VA.	U.S. Geological Survey	USGS		68.625	-158.75	0.01	56	56	56	ES	SEDIMENTARY	UNKNOWN	UNKNOWN	CLAYSTONE																							3	700	150	50	200		1500
D119757		USGS		Geochemistry of rock samples from the National Geochemical Database: U.S. Geological Survey, Reston, VA.	U.S. Geological Survey	USGS		68.625	-158.75	0.01	56	56	56	AAS	SEDIMENTARY	UNKNOWN	UNKNOWN	CLAYSTONE
D119757		USGS		Geochemistry of rock samples from the National Geochemical Database: U.S. Geological Survey, Reston, VA.	U.S. Geological Survey	USGS		68.625	-158.75	0.01	56	56	56	COL	SEDIMENTARY	UNKNOWN	UNKNOWN	CLAYSTONE																															0.14
D119757		USGS		Geochemistry of rock samples from the National Geochemical Database: U.S. Geological Survey, Reston, VA.	U.S. Geological Survey	USGS		68.625	-158.75	0.01	56	56	56	ES	SEDIMENTARY	UNKNOWN	UNKNOWN	CLAYSTONE																							3	1000	100	30	100
D119759		USGS		Geochemistry of rock samples from the National Geochemical Database: U.S. Geological Survey, Reston, VA.	U.S. Geological Survey	USGS		68.625	-158.75	0.01	56	56	56	AAS	SEDIMENTARY	UNKNOWN	UNKNOWN	CLAYSTONE
D119759		USGS		Geochemistry of rock samples from the National Geochemical Database: U.S. Geological Survey, Reston, VA.	U.S. Geological Survey	USGS		68.625	-158.75	0.01	56	56	56	COL	SEDIMENTARY	UNKNOWN	UNKNOWN	CLAYSTONE
D119759		USGS		Geochemistry of rock samples from the National Geochemical Database: U.S. Geological Survey, Reston, VA.	U.S. Geological Survey	USGS		68.625	-158.75	0.01	56	56	56	ES	SEDIMENTARY	UNKNOWN	UNKNOWN	CLAYSTONE																							2	300	70	20	100
D119760		USGS		Geochemistry of rock samples from the National Geochemical Database: U.S. Geological Survey, Reston, VA.	U.S. Geological Survey	USGS		68.625	-158.75	0.01	56	63	70	ES	SEDIMENTARY	UNKNOWN	UNKNOWN	CLAYSTONE																						7	3	500	200	100	100		700		2
D119762		USGS		Geochemistry of rock samples from the National Geochemical Database: U.S. Geological Survey, Reston, VA.	U.S. Geological Survey	USGS		68.625	-158.75	0.01	56	56	56	AAS	SEDIMENTARY	UNKNOWN	UNKNOWN	CLAYSTONE
D119762		USGS		Geochemistry of rock samples from the National Geochemical Database: U.S. Geological Survey, Reston, VA.	U.S. Geological Survey	USGS		68.625	-158.75	0.01	56	56	56	COL	SEDIMENTARY	UNKNOWN	UNKNOWN	CLAYSTONE																															0.2
D119762		USGS		Geochemistry of rock samples from the National Geochemical Database: U.S. Geological Survey, Reston, VA.	U.S. Geological Survey	USGS		68.625	-158.75	0.01	56	56	56	ES	SEDIMENTARY	UNKNOWN	UNKNOWN	CLAYSTONE																							2	200	100	50	150
D121151		USGS		Geochemistry of rock samples from the National Geochemical Database: U.S. Geological Survey, Reston, VA.	U.S. Geological Survey	USGS		37.3667	-88.3667	0.01	68	68	68	UNKNOWN	SEDIMENTARY	UNKNOWN	UNKNOWN	CLAYSTONE		43.4	0.55	11.1		2.2		0.56	0.07	1.4	18.8	0.1	2	0.07									1.6	280	30	13	8
D121210		USGS		Geochemistry of rock samples from the National Geochemical Database: U.S. Geological Survey, Reston, VA.	U.S. Geological Survey	USGS		37.25	-84.3667	0.01	68	68	68	UNKNOWN	SEDIMENTARY	UNKNOWN	UNKNOWN	CLAYSTONE		63.2	0.89	17.2		4.4		0.4	0.05	1.6	0.24	0.3	2.5	0.12									3.4	120	60	11	19
D121293		USGS		Geochemistry of rock samples from the National Geochemical Database: U.S. Geological Survey, Reston, VA.	U.S. Geological Survey	USGS		37.25	-84.3667	0.01	68	68	68	UNKNOWN	SEDIMENTARY	UNKNOWN	UNKNOWN	CLAYSTONE		63.2	0.91	17.6		4.1		0.44	0.05	1.5	0.7	0.4	3.2	0.11									4.4	150	73	17	24
D121348		USGS		Geochemistry of rock samples from the National Geochemical Database: U.S. Geological Survey, Reston, VA.	U.S. Geological Survey	USGS		37.3667	-88.3667	0.01	68	68	68	UNKNOWN	SEDIMENTARY	UNKNOWN	UNKNOWN	CLAYSTONE		39.3	0.51	10.2		3.2		0.44	0.05	1.4	21.1	0.4	2.3	0.08									1.7	380	20	9	5
D121485		USGS		Geochemistry of rock samples from the National Geochemical Database: U.S. Geological Survey, Reston, VA.	U.S. Geological Survey	USGS		37.3667	-88.3667	0.01	68	68	68	UNKNOWN	SEDIMENTARY	UNKNOWN	UNKNOWN	CLAYSTONE		39.4	0.47	10.2		3.2		0.52	0.1	1.1	21.7	0.1	1.8	0.07									6.4	630	30	12	8
D121553		USGS		Geochemistry of rock samples from the National Geochemical Database: U.S. Geological Survey, Reston, VA.	U.S. Geological Survey	USGS		37.3667	-88.3667	0.01	68	68	68	UNKNOWN	SEDIMENTARY	UNKNOWN	UNKNOWN	CLAYSTONE		42.8	0.57	11.1		2.4		0.48	0.06	1.3	18.9	0.1	2.5	0.08									5.6	500	37	17	9
D124748		USGS		Geochemistry of rock samples from the National Geochemical Database: U.S. Geological Survey, Reston, VA.	U.S. Geological Survey	USGS		46.5	-102	0.01	22	22	22	UNKNOWN	SEDIMENTARY	UNKNOWN	UNKNOWN	CLAYSTONE																							2	1000	15	10	30
D124749		USGS		Geochemistry of rock samples from the National Geochemical Database: U.S. Geological Survey, Reston, VA.	U.S. Geological Survey	USGS		46.5	-102	0.01	22	22	22	UNKNOWN	SEDIMENTARY	UNKNOWN	UNKNOWN	CLAYSTONE																							3	700	15	7	30
D124750		USGS		Geochemistry of rock samples from the National Geochemical Database: U.S. Geological Survey, Reston, VA.	U.S. Geological Survey	USGS		46.5	-102	0.01	22	22	22	UNKNOWN	SEDIMENTARY	UNKNOWN	UNKNOWN	CLAYSTONE																							3	150	30	15	70
D124751		USGS		Geochemistry of rock samples from the National Geochemical Database: U.S. Geological Survey, Reston, VA.	U.S. Geological Survey	USGS		46.5	-102	0.01	22	22	22	UNKNOWN	SEDIMENTARY	UNKNOWN	UNKNOWN	CLAYSTONE																							5	200	50	15	50
D124753		USGS		Geochemistry of rock samples from the National Geochemical Database: U.S. Geological Survey, Reston, VA.	U.S. Geological Survey	USGS		46.5	-102	0.01	22	22	22	UNKNOWN	SEDIMENTARY	UNKNOWN	UNKNOWN	CLAYSTONE																							3	700	50	15	50
D124754		USGS		Geochemistry of rock samples from the National Geochemical Database: U.S. Geological Survey, Reston, VA.	U.S. Geological Survey	USGS		46.5	-102	0.01	22	22	22	UNKNOWN	SEDIMENTARY	UNKNOWN	UNKNOWN	CLAYSTONE																							5	1000	50	15	50
D124755		USGS		Geochemistry of rock samples from the National Geochemical Database: U.S. Geological Survey, Reston, VA.	U.S. Geological Survey	USGS		46.5	-102	0.01	22	22	22	UNKNOWN	SEDIMENTARY	UNKNOWN	UNKNOWN	CLAYSTONE																							5	1000	30	10	50
D124756		USGS		Geochemistry of rock samples from the National Geochemical Database: U.S. Geological Survey, Reston, VA.	U.S. Geological Survey	USGS		46.5	-102	0.01	22	22	22	UNKNOWN	SEDIMENTARY	UNKNOWN	UNKNOWN	CLAYSTONE																							3	700	30	15	50
D124758		USGS		Geochemistry of rock samples from the National Geochemical Database: U.S. Geological Survey, Reston, VA.	U.S. Geological Survey	USGS		46.5	-102	0.01	22	22	22	UNKNOWN	SEDIMENTARY	UNKNOWN	UNKNOWN	CLAYSTONE																							5	1000	30	10	50
D124760		USGS		Geochemistry of rock samples from the National Geochemical Database: U.S. Geological Survey, Reston, VA.	U.S. Geological Survey	USGS		46.5	-102	0.01	22	22	22	UNKNOWN	SEDIMENTARY	UNKNOWN	UNKNOWN	CLAYSTONE																							5	150	50	20	50
D124763		USGS		Geochemistry of rock samples from the National Geochemical Database: U.S. Geological Survey, Reston, VA.	U.S. Geological Survey	USGS		46.5	-102	0.01	22	22	22	UNKNOWN	SEDIMENTARY	UNKNOWN	UNKNOWN	CLAYSTONE																							3	70	20	10	30
D124764		USGS		Geochemistry of rock samples from the National Geochemical Database: U.S. Geological Survey, Reston, VA.	U.S. Geological Survey	USGS		46.5	-102	0.01	22	22	22	UNKNOWN	SEDIMENTARY	UNKNOWN	UNKNOWN	CLAYSTONE																							3	100	20	7	20
D124765		USGS		Geochemistry of rock samples from the National Geochemical Database: U.S. Geological Survey, Reston, VA.	U.S. Geological Survey	USGS		46.5	-102	0.01	22	22	22	UNKNOWN	SEDIMENTARY	UNKNOWN	UNKNOWN	CLAYSTONE																							2	70	30	15	30
D124766		USGS		Geochemistry of rock samples from the National Geochemical Database: U.S. Geological Survey, Reston, VA.	U.S. Geological Survey	USGS		46.5	-102	0.01	22	22	22	UNKNOWN	SEDIMENTARY	UNKNOWN	UNKNOWN	CLAYSTONE																							2	150	15	5	20
D124767		USGS		Geochemistry of rock samples from the National Geochemical Database: U.S. Geological Survey, Reston, VA.	U.S. Geological Survey	USGS		46.5	-102	0.01	22	22	22	UNKNOWN	SEDIMENTARY	UNKNOWN	UNKNOWN	CLAYSTONE																							3	1000	15	5	30
D124768		USGS		Geochemistry of rock samples from the National Geochemical Database: U.S. Geological Survey, Reston, VA.	U.S. Geological Survey	USGS		46.5	-102	0.01	22	22	22	UNKNOWN	SEDIMENTARY	UNKNOWN	UNKNOWN	CLAYSTONE																							2	70	15	3	30
D124769		USGS		Geochemistry of rock samples from the National Geochemical Database: U.S. Geological Survey, Reston, VA.	U.S. Geological Survey	USGS		46.5	-102	0.01	22	22	22	UNKNOWN	SEDIMENTARY	UNKNOWN	UNKNOWN	CLAYSTONE																							2	500	15	5	50
D124770		USGS		Geochemistry of rock samples from the National Geochemical Database: U.S. Geological Survey, Reston, VA.	U.S. Geological Survey	USGS		46.5	-102	0.01	22	22	22	UNKNOWN	SEDIMENTARY	UNKNOWN	UNKNOWN	CLAYSTONE																							3	700	15	7	30
D124771		USGS		Geochemistry of rock samples from the National Geochemical Database: U.S. Geological Survey, Reston, VA.	U.S. Geological Survey	USGS		46.5	-102	0.01	22	22	22	UNKNOWN	SEDIMENTARY	UNKNOWN	UNKNOWN	CLAYSTONE																							3	500	15	7	30
D124772		USGS		Geochemistry of rock samples from the National Geochemical Database: U.S. Geological Survey, Reston, VA.	U.S. Geological Survey	USGS		46.5	-102	0.01	22	22	22	UNKNOWN	SEDIMENTARY	UNKNOWN	UNKNOWN	CLAYSTONE																							5	500	20	10	50
D124773		USGS		Geochemistry of rock samples from the National Geochemical Database: U.S. Geological Survey, Reston, VA.	U.S. Geological Survey	USGS		46.5	-102	0.01	22	22	22	UNKNOWN	SEDIMENTARY	UNKNOWN	UNKNOWN	CLAYSTONE																							3	500	30	15	50
D124774		USGS		Geochemistry of rock samples from the National Geochemical Database: U.S. Geological Survey, Reston, VA.	U.S. Geological Survey	USGS		46.5	-102	0.01	22	22	22	UNKNOWN	SEDIMENTARY	UNKNOWN	UNKNOWN	CLAYSTONE																							3	500	30	15	70
D124775		USGS		Geochemistry of rock samples from the National Geochemical Database: U.S. Geological Survey, Reston, VA.	U.S. Geological Survey	USGS		46.5	-102	0.01	22	22	22	UNKNOWN	SEDIMENTARY	UNKNOWN	UNKNOWN	CLAYSTONE																							5	1500	20	10	70
D124776		USGS		Geochemistry of rock samples from the National Geochemical Database: U.S. Geological Survey, Reston, VA.	U.S. Geological Survey	USGS		46.5	-102	0.01	22	22	22	UNKNOWN	SEDIMENTARY	UNKNOWN	UNKNOWN	CLAYSTONE																							2	300	15	7	30
D124777		USGS		Geochemistry of rock samples from the National Geochemical Database: U.S. Geological Survey, Reston, VA.	U.S. Geological Survey	USGS		46.5	-102	0.01	22	22	22	UNKNOWN	SEDIMENTARY	UNKNOWN	UNKNOWN	CLAYSTONE																							3	150	20	10	30
D124778		USGS		Geochemistry of rock samples from the National Geochemical Database: U.S. Geological Survey, Reston, VA.	U.S. Geological Survey	USGS		46.5	-102	0.01	22	22	22	UNKNOWN	SEDIMENTARY	UNKNOWN	UNKNOWN	CLAYSTONE																							2	700	10	3	30
D124779		USGS		Geochemistry of rock samples from the National Geochemical Database: U.S. Geological Survey, Reston, VA.	U.S. Geological Survey	USGS		46.5	-102	0.01	22	22	22	UNKNOWN	SEDIMENTARY	UNKNOWN	UNKNOWN	CLAYSTONE																							3	500	15	7	50
D124780		USGS		Geochemistry of rock samples from the National Geochemical Database: U.S. Geological Survey, Reston, VA.	U.S. Geological Survey	USGS		46.5	-102	0.01	22	22	22	UNKNOWN	SEDIMENTARY	UNKNOWN	UNKNOWN	CLAYSTONE																							3	500	20	10	50
D124781		USGS		Geochemistry of rock samples from the National Geochemical Database: U.S. Geological Survey, Reston, VA.	U.S. Geological Survey	USGS		46.5	-102	0.01	22	22	22	UNKNOWN	SEDIMENTARY	UNKNOWN	UNKNOWN	CLAYSTONE																							3	700	15	7	50
D124782		USGS		Geochemistry of rock samples from the National Geochemical Database: U.S. Geological Survey, Reston, VA.	U.S. Geological Survey	USGS		46.5	-102	0.01	22	22	22	UNKNOWN	SEDIMENTARY	UNKNOWN	UNKNOWN	CLAYSTONE																							3	700	15	3	30
D124788		USGS		Geochemistry of rock samples from the National Geochemical Database: U.S. Geological Survey, Reston, VA.	U.S. Geological Survey	USGS		46.55	-102.2	0.01	22	22	22	UNKNOWN	SEDIMENTARY	UNKNOWN	UNKNOWN	CLAYSTONE																							0.3	30	3		15
D124790		USGS		Geochemistry of rock samples from the National Geochemical Database: U.S. Geological Survey, Reston, VA.	U.S. Geological Survey	USGS		46.55	-102.2	0.01	22	22	22	UNKNOWN	SEDIMENTARY	UNKNOWN	UNKNOWN	CLAYSTONE																							2	70	20	5	70
D124792		USGS		Geochemistry of rock samples from the National Geochemical Database: U.S. Geological Survey, Reston, VA.	U.S. Geological Survey	USGS		46.55	-102.2	0.01	22	22	22	UNKNOWN	SEDIMENTARY	UNKNOWN	UNKNOWN	CLAYSTONE																							7	150	70	30	70
D124793		USGS		Geochemistry of rock samples from the National Geochemical Database: U.S. Geological Survey, Reston, VA.	U.S. Geological Survey	USGS		46.55	-102.2	0.01	22	22	22	UNKNOWN	SEDIMENTARY	UNKNOWN	UNKNOWN	CLAYSTONE																							5	200	30	15	70
D124796		USGS		Geochemistry of rock samples from the National Geochemical Database: U.S. Geological Survey, Reston, VA.	U.S. Geological Survey	USGS		46.55	-102.2	0.01	22	22	22	UNKNOWN	SEDIMENTARY	UNKNOWN	UNKNOWN	CLAYSTONE																							5	200	50	15	50
D124798		USGS		Geochemistry of rock samples from the National Geochemical Database: U.S. Geological Survey, Reston, VA.	U.S. Geological Survey	USGS		46.6167	-102.183	0.01	22	22	22	UNKNOWN	SEDIMENTARY	UNKNOWN	UNKNOWN	CLAYSTONE																							5	150	50	15	50
D126422		USGS		Geochemistry of rock samples from the National Geochemical Database: U.S. Geological Survey, Reston, VA.	U.S. Geological Survey	USGS		44	-113.75	0.01	68	68	68	UNKNOWN	SEDIMENTARY	UNKNOWN	UNKNOWN	CLAYSTONE																							5	1000	150	20	70		700
D126423		USGS		Geochemistry of rock samples from the National Geochemical Database: U.S. Geological Survey, Reston, VA.	U.S. Geological Survey	USGS		44	-113.75	0.01	68	68	68	UNKNOWN	SEDIMENTARY	UNKNOWN	UNKNOWN	CLAYSTONE																						7	1	700	10	3	7
D126424		USGS		Geochemistry of rock samples from the National Geochemical Database: U.S. Geological Survey, Reston, VA.	U.S. Geological Survey	USGS		44	-113.75	0.01	68	68	68	UNKNOWN	SEDIMENTARY	UNKNOWN	UNKNOWN	CLAYSTONE																								300	150	15	200		1000		1
D126425		USGS		Geochemistry of rock samples from the National Geochemical Database: U.S. Geological Survey, Reston, VA.	U.S. Geological Survey	USGS		43.8667	-113.367	0.01	68	68	68	UNKNOWN	SEDIMENTARY	UNKNOWN	UNKNOWN	CLAYSTONE																							5	70	300	3	20		500
D129006		USGS		Geochemistry of rock samples from the National Geochemical Database: U.S. Geological Survey, Reston, VA.	U.S. Geological Survey	USGS		35.45	-108.167	0.01	56	56	56	UNKNOWN	SEDIMENTARY	UNKNOWN	UNKNOWN	CLAYSTONE																							2	150	10	5	10
D129026		USGS		Geochemistry of rock samples from the National Geochemical Database: U.S. Geological Survey, Reston, VA.	U.S. Geological Survey	USGS		35.45	-108.167	0.01	56	56	56	UNKNOWN	SEDIMENTARY	UNKNOWN	UNKNOWN	CLAYSTONE																							3	70	7	5	10
D129028		USGS		Geochemistry of rock samples from the National Geochemical Database: U.S. Geological Survey, Reston, VA.	U.S. Geological Survey	USGS		35.45	-108.167	0.01	56	56	56	UNKNOWN	SEDIMENTARY	UNKNOWN	UNKNOWN	CLAYSTONE																							1.5	200	5	5	3
D129049		USGS		Geochemistry of rock samples from the National Geochemical Database: U.S. Geological Survey, Reston, VA.	U.S. Geological Survey	USGS		35.45	-108.183	0.01	56	56	56	UNKNOWN	SEDIMENTARY	UNKNOWN	UNKNOWN	CLAYSTONE																							0.7	50	3	3
D129352		USGS		Geochemistry of rock samples from the National Geochemical Database: U.S. Geological Survey, Reston, VA.	U.S. Geological Survey	USGS		34.75	-99.5	0.01	71	71	71	UNKNOWN	SEDIMENTARY	UNKNOWN	UNKNOWN	CLAYSTONE														0.21									5	300	50	15
D129353		USGS		Geochemistry of rock samples from the National Geochemical Database: U.S. Geological Survey, Reston, VA.	U.S. Geological Survey	USGS		34.75	-99.5	0.01	71	71	71	UNKNOWN	SEDIMENTARY	UNKNOWN	UNKNOWN	CLAYSTONE														0.24									7	1500	50	30
D129354		USGS		Geochemistry of rock samples from the National Geochemical Database: U.S. Geological Survey, Reston, VA.	U.S. Geological Survey	USGS		34.75	-99.5	0.01	71	71	71	UNKNOWN	SEDIMENTARY	UNKNOWN	UNKNOWN	CLAYSTONE														0.23									3	1500	30	15					1
D129355		USGS		Geochemistry of rock samples from the National Geochemical Database: U.S. Geological Survey, Reston, VA.	U.S. Geological Survey	USGS		34.75	-99.5	0.01	71	71	71	UNKNOWN	SEDIMENTARY	UNKNOWN	UNKNOWN	CLAYSTONE														0.17									7	200	30	15
D129424		USGS		Geochemistry of rock samples from the National Geochemical Database: U.S. Geological Survey, Reston, VA.	U.S. Geological Survey	USGS		42.7	-107.7	0.01	18	18	18	UNKNOWN	SEDIMENTARY	UNKNOWN	UNKNOWN	CLAYSTONE																							5	500	15	10	30
D129425		USGS		Geochemistry of rock samples from the National Geochemical Database: U.S. Geological Survey, Reston, VA.	U.S. Geological Survey	USGS		42.35	-106.4	0.01	18	18	18	UNKNOWN	SEDIMENTARY	UNKNOWN	UNKNOWN	CLAYSTONE																							5	150	30	15	20
D129426		USGS		Geochemistry of rock samples from the National Geochemical Database: U.S. Geological Survey, Reston, VA.	U.S. Geological Survey	USGS		42.35	-106.4	0.01	18	18	18	UNKNOWN	SEDIMENTARY	UNKNOWN	UNKNOWN	CLAYSTONE																							5	100	20	10	20
D129427		USGS		Geochemistry of rock samples from the National Geochemical Database: U.S. Geological Survey, Reston, VA.	U.S. Geological Survey	USGS		42.35	-106.4	0.01	18	18	18	UNKNOWN	SEDIMENTARY	UNKNOWN	UNKNOWN	CLAYSTONE																							7	150	15	10	10
D129428		USGS		Geochemistry of rock samples from the National Geochemical Database: U.S. Geological Survey, Reston, VA.	U.S. Geological Survey	USGS		42.35	-106.4	0.01	18	18	18	UNKNOWN	SEDIMENTARY	UNKNOWN	UNKNOWN	CLAYSTONE																							7	150	30	10	20
D129430		USGS		Geochemistry of rock samples from the National Geochemical Database: U.S. Geological Survey, Reston, VA.	U.S. Geological Survey	USGS		41.3167	-109.65	0.01	18	18	18	UNKNOWN	SEDIMENTARY	UNKNOWN	UNKNOWN	CLAYSTONE																							3	70	3		15
D129431		USGS		Geochemistry of rock samples from the National Geochemical Database: U.S. Geological Survey, Reston, VA.	U.S. Geological Survey	USGS		41.25	-109.717	0.01	18	18	18	UNKNOWN	SEDIMENTARY	UNKNOWN	UNKNOWN	CLAYSTONE																							7	500	7	15	15
D129432		USGS		Geochemistry of rock samples from the National Geochemical Database: U.S. Geological Survey, Reston, VA.	U.S. Geological Survey	USGS		40.2333	-109.15	0.01	18	18	18	UNKNOWN	SEDIMENTARY	UNKNOWN	UNKNOWN	CLAYSTONE																							3	150	50	10	30
D129433		USGS		Geochemistry of rock samples from the National Geochemical Database: U.S. Geological Survey, Reston, VA.	U.S. Geological Survey	USGS		40.0833	-109.217	0.01	18	18	18	UNKNOWN	SEDIMENTARY	UNKNOWN	UNKNOWN	CLAYSTONE																							1.5	100	5	3	10
D129434		USGS		Geochemistry of rock samples from the National Geochemical Database: U.S. Geological Survey, Reston, VA.	U.S. Geological Survey	USGS		40.0667	-109.2	0.01	18	18	18	UNKNOWN	SEDIMENTARY	UNKNOWN	UNKNOWN	CLAYSTONE																							3	500	20	7	30
D129436		USGS		Geochemistry of rock samples from the National Geochemical Database: U.S. Geological Survey, Reston, VA.	U.S. Geological Survey	USGS		39.6	-108.783	0.01	18	18	18	UNKNOWN	SEDIMENTARY	UNKNOWN	UNKNOWN	CLAYSTONE																							7	300	50	20	100
D129442		USGS		Geochemistry of rock samples from the National Geochemical Database: U.S. Geological Survey, Reston, VA.	U.S. Geological Survey	USGS		43.7833	-105.967	0.01	18	18	18	UNKNOWN	SEDIMENTARY	UNKNOWN	UNKNOWN	CLAYSTONE																							3	500	30	7	200
D129669		USGS		Geochemistry of rock samples from the National Geochemical Database: U.S. Geological Survey, Reston, VA.	U.S. Geological Survey	USGS		41.0667	-109.933	0.01	18	18	18	UNKNOWN	SEDIMENTARY	UNKNOWN	UNKNOWN	CLAYSTONE																							0.7	500	10		10
D129711		USGS		Geochemistry of rock samples from the National Geochemical Database: U.S. Geological Survey, Reston, VA.	U.S. Geological Survey	USGS		40.05	-108.267	0.01	18	18	18	UNKNOWN	SEDIMENTARY	UNKNOWN	UNKNOWN	CLAYSTONE																						5	1	1000	20		10
D129790		USGS		Geochemistry of rock samples from the National Geochemical Database: U.S. Geological Survey, Reston, VA.	U.S. Geological Survey	USGS		43.6333	-107.583	0.01	18	18	18	UNKNOWN	SEDIMENTARY	UNKNOWN	UNKNOWN	CLAYSTONE																							0.5	700	15		15
D129803		USGS		Geochemistry of rock samples from the National Geochemical Database: U.S. Geological Survey, Reston, VA.	U.S. Geological Survey	USGS		41.0667	-110.15	0.01	18	18	18	UNKNOWN	SEDIMENTARY	UNKNOWN	UNKNOWN	CLAYSTONE																						10	0.1	1500	5		10
D129968		USGS		Geochemistry of rock samples from the National Geochemical Database: U.S. Geological Survey, Reston, VA.	U.S. Geological Survey	USGS		44.5	-110.25	0.01	7	7	7	UNKNOWN	SEDIMENTARY	UNKNOWN	UNKNOWN	CLAYSTONE																							1.5	300	20	15	30
D129969		USGS		Geochemistry of rock samples from the National Geochemical Database: U.S. Geological Survey, Reston, VA.	U.S. Geological Survey	USGS		44.5	-110.25	0.01	7	7	7	UNKNOWN	SEDIMENTARY	UNKNOWN	UNKNOWN	CLAYSTONE																							2	700	30	20	30
D129970		USGS		Geochemistry of rock samples from the National Geochemical Database: U.S. Geological Survey, Reston, VA.	U.S. Geological Survey	USGS		44.5	-110.25	0.01	7	7	7	UNKNOWN	SEDIMENTARY	UNKNOWN	UNKNOWN	CLAYSTONE																							1.5	500	70	30	30
D129971		USGS		Geochemistry of rock samples from the National Geochemical Database: U.S. Geological Survey, Reston, VA.	U.S. Geological Survey	USGS		44.5	-110.25	0.01	7	7	7	UNKNOWN	SEDIMENTARY	UNKNOWN	UNKNOWN	CLAYSTONE																							1.5	300	70	30	30
D129972		USGS		Geochemistry of rock samples from the National Geochemical Database: U.S. Geological Survey, Reston, VA.	U.S. Geological Survey	USGS		44.5	-110.25	0.01	7	7	7	UNKNOWN	SEDIMENTARY	UNKNOWN	UNKNOWN	CLAYSTONE																							1.5	300	50	15	30
D129980		USGS		Geochemistry of rock samples from the National Geochemical Database: U.S. Geological Survey, Reston, VA.	U.S. Geological Survey	USGS		44	-110.5	0.01	65	65	65	UNKNOWN	SEDIMENTARY	UNKNOWN	UNKNOWN	CLAYSTONE																							1.5	300	30	7	20
D129981		USGS		Geochemistry of rock samples from the National Geochemical Database: U.S. Geological Survey, Reston, VA.	U.S. Geological Survey	USGS		43.875	-110.375	0.01	22	22	22	UNKNOWN	SEDIMENTARY	UNKNOWN	UNKNOWN	CLAYSTONE																							2	150	20	10	30
D129982		USGS		Geochemistry of rock samples from the National Geochemical Database: U.S. Geological Survey, Reston, VA.	U.S. Geological Survey	USGS		43.875	-110.375	0.01	22	22	22	UNKNOWN	SEDIMENTARY	UNKNOWN	UNKNOWN	CLAYSTONE																							1.5	300	20	10	30
D129983		USGS		Geochemistry of rock samples from the National Geochemical Database: U.S. Geological Survey, Reston, VA.	U.S. Geological Survey	USGS		44	-110.5	0.01	22	22	22	UNKNOWN	SEDIMENTARY	UNKNOWN	UNKNOWN	CLAYSTONE																							3	300	20	15	30
D129984		USGS		Geochemistry of rock samples from the National Geochemical Database: U.S. Geological Survey, Reston, VA.	U.S. Geological Survey	USGS		44	-110.5	0.01	22	22	22	UNKNOWN	SEDIMENTARY	UNKNOWN	UNKNOWN	CLAYSTONE																							3	150	30	15	30
D129988		USGS		Geochemistry of rock samples from the National Geochemical Database: U.S. Geological Survey, Reston, VA.	U.S. Geological Survey	USGS		44	-110.5	0.01	65	65	65	UNKNOWN	SEDIMENTARY	UNKNOWN	UNKNOWN	CLAYSTONE																							1.5	70	20	7	30
D129998		USGS		Geochemistry of rock samples from the National Geochemical Database: U.S. Geological Survey, Reston, VA.	U.S. Geological Survey	USGS		44.25	-109	0.01	3	3	3	UNKNOWN	SEDIMENTARY	UNKNOWN	UNKNOWN	CLAYSTONE																							1.5	300	15	3	10
D130003		USGS		Geochemistry of rock samples from the National Geochemical Database: U.S. Geological Survey, Reston, VA.	U.S. Geological Survey	USGS		44.75	-110.25	0.01	7	7	7	UNKNOWN	SEDIMENTARY	UNKNOWN	UNKNOWN	CLAYSTONE																							0.3	15	3		30
D130004		USGS		Geochemistry of rock samples from the National Geochemical Database: U.S. Geological Survey, Reston, VA.	U.S. Geological Survey	USGS		44.75	-110.25	0.01	7	7	7	UNKNOWN	SEDIMENTARY	UNKNOWN	UNKNOWN	CLAYSTONE																							3	100	30	20	30
D130370		USGS		Geochemistry of rock samples from the National Geochemical Database: U.S. Geological Survey, Reston, VA.	U.S. Geological Survey	USGS		35.3833	-108	0.01	56	56	56	UNKNOWN	SEDIMENTARY	UNKNOWN	UNKNOWN	CLAYSTONE																							3	150	7	7	10
D130387		USGS		Geochemistry of rock samples from the National Geochemical Database: U.S. Geological Survey, Reston, VA.	U.S. Geological Survey	USGS		35.3833	-108	0.01	56	56	56	UNKNOWN	SEDIMENTARY	UNKNOWN	UNKNOWN	CLAYSTONE																							3	150	15	7	20
D130392		USGS		Geochemistry of rock samples from the National Geochemical Database: U.S. Geological Survey, Reston, VA.	U.S. Geological Survey	USGS		35.3833	-108	0.01	56	56	56	UNKNOWN	SEDIMENTARY	UNKNOWN	UNKNOWN	CLAYSTONE																							1.5	150	5	3	10
D130395		USGS		Geochemistry of rock samples from the National Geochemical Database: U.S. Geological Survey, Reston, VA.	U.S. Geological Survey	USGS		35.3833	-108	0.01	56	56	56	UNKNOWN	SEDIMENTARY	UNKNOWN	UNKNOWN	CLAYSTONE																							3	150	5	7	10
D130718		USGS		Geochemistry of rock samples from the National Geochemical Database: U.S. Geological Survey, Reston, VA.	U.S. Geological Survey	USGS		35.3833	-108	0.01	56	56	56	UNKNOWN	SEDIMENTARY	UNKNOWN	UNKNOWN	CLAYSTONE																							3	200	5	5	20
D130737		USGS		Geochemistry of rock samples from the National Geochemical Database: U.S. Geological Survey, Reston, VA.	U.S. Geological Survey	USGS		35.3833	-108	0.01	56	56	56	UNKNOWN	SEDIMENTARY	UNKNOWN	UNKNOWN	CLAYSTONE																							1	150	3	3	15
D131150		USGS		Geochemistry of rock samples from the National Geochemical Database: U.S. Geological Survey, Reston, VA.	U.S. Geological Survey	USGS		35.3833	-108	0.01	56	56	56	UNKNOWN	SEDIMENTARY	UNKNOWN	UNKNOWN	CLAYSTONE																							0.7	100	3	3	3
D131154		USGS		Geochemistry of rock samples from the National Geochemical Database: U.S. Geological Survey, Reston, VA.	U.S. Geological Survey	USGS		35.3833	-108	0.01	56	56	56	UNKNOWN	SEDIMENTARY	UNKNOWN	UNKNOWN	CLAYSTONE																							0.7	150	3	3	5
D132250		USGS		Geochemistry of rock samples from the National Geochemical Database: U.S. Geological Survey, Reston, VA.	U.S. Geological Survey	USGS		34.75	-97.125	0.01	71	71	71	UNKNOWN	SEDIMENTARY	UNKNOWN	UNKNOWN	CLAYSTONE																							3	150	50	15	10		0.01
D132251		USGS		Geochemistry of rock samples from the National Geochemical Database: U.S. Geological Survey, Reston, VA.	U.S. Geological Survey	USGS		34.75	-97.125	0.01	71	71	71	UNKNOWN	SEDIMENTARY	UNKNOWN	UNKNOWN	CLAYSTONE																							3	150	50	15	10		0.011
D132252		USGS		Geochemistry of rock samples from the National Geochemical Database: U.S. Geological Survey, Reston, VA.	U.S. Geological Survey	USGS		34.75	-97.125	0.01	71	71	71	UNKNOWN	SEDIMENTARY	UNKNOWN	UNKNOWN	CLAYSTONE																							3	150	50	15	7		0.011
D132253		USGS		Geochemistry of rock samples from the National Geochemical Database: U.S. Geological Survey, Reston, VA.	U.S. Geological Survey	USGS		34.75	-97.125	0.01	71	71	71	UNKNOWN	SEDIMENTARY	UNKNOWN	UNKNOWN	CLAYSTONE																							3	150	50	15	7		0.011
D132254		USGS		Geochemistry of rock samples from the National Geochemical Database: U.S. Geological Survey, Reston, VA.	U.S. Geological Survey	USGS		34.75	-97.125	0.01	71	71	71	UNKNOWN	SEDIMENTARY	UNKNOWN	UNKNOWN	CLAYSTONE																							3	100	50	10	7		0.011
D132255		USGS		Geochemistry of rock samples from the National Geochemical Database: U.S. Geological Survey, Reston, VA.	U.S. Geological Survey	USGS		34.75	-97.125	0.01	71	71	71	UNKNOWN	SEDIMENTARY	UNKNOWN	UNKNOWN	CLAYSTONE																							3	150	50	15	7		0.01
D132256		USGS		Geochemistry of rock samples from the National Geochemical Database: U.S. Geological Survey, Reston, VA.	U.S. Geological Survey	USGS		34.75	-97.125	0.01	71	71	71	UNKNOWN	SEDIMENTARY	UNKNOWN	UNKNOWN	CLAYSTONE																							3	100	50	10	7		0.01
D132257		USGS		Geochemistry of rock samples from the National Geochemical Database: U.S. Geological Survey, Reston, VA.	U.S. Geological Survey	USGS		34.75	-97.125	0.01	71	71	71	UNKNOWN	SEDIMENTARY	UNKNOWN	UNKNOWN	CLAYSTONE																							3	100	50	10	7		0.01
D132258		USGS		Geochemistry of rock samples from the National Geochemical Database: U.S. Geological Survey, Reston, VA.	U.S. Geological Survey	USGS		34.75	-97.125	0.01	71	71	71	UNKNOWN	SEDIMENTARY	UNKNOWN	UNKNOWN	CLAYSTONE																							3	100	50	10	15		0.01		0.0003
D132259		USGS		Geochemistry of rock samples from the National Geochemical Database: U.S. Geological Survey, Reston, VA.	U.S. Geological Survey	USGS		34.75	-97.125	0.01	71	71	71	UNKNOWN	SEDIMENTARY	UNKNOWN	UNKNOWN	CLAYSTONE																							3	150	50	15	50		0.01		0.7
D132260		USGS		Geochemistry of rock samples from the National Geochemical Database: U.S. Geological Survey, Reston, VA.	U.S. Geological Survey	USGS		34.75	-97.125	0.01	71	71	71	UNKNOWN	SEDIMENTARY	UNKNOWN	UNKNOWN	CLAYSTONE																							3	150	70	15	50		0.0075		0.7
D132274		USGS		Geochemistry of rock samples from the National Geochemical Database: U.S. Geological Survey, Reston, VA.	U.S. Geological Survey	USGS		34.75	-97.125	0.01	71	71	71	UNKNOWN	SEDIMENTARY	UNKNOWN	UNKNOWN	CLAYSTONE																							5	200	50	15	700		0.0076		1
D132275		USGS		Geochemistry of rock samples from the National Geochemical Database: U.S. Geological Survey, Reston, VA.	U.S. Geological Survey	USGS		34.75	-97.125	0.01	71	71	71	UNKNOWN	SEDIMENTARY	UNKNOWN	UNKNOWN	CLAYSTONE																							2	150	50	15	1000		0.0065		700
D133317		USGS		Geochemistry of rock samples from the National Geochemical Database: U.S. Geological Survey, Reston, VA.	U.S. Geological Survey	USGS		42.35	-106.4	0.01	18	18	18	UNKNOWN	SEDIMENTARY	UNKNOWN	UNKNOWN	CLAYSTONE		66.7	0.45	14.7		4.6		0.1	0.02	1.1	0.5	0.5	2.7	0.12									2.1	100	30	13	14
D137660		USGS		Geochemistry of rock samples from the National Geochemical Database: U.S. Geological Survey, Reston, VA.	U.S. Geological Survey	USGS		46.75	-101.667	0.01	22	22	22	UNKNOWN	SEDIMENTARY	UNKNOWN	UNKNOWN	CLAYSTONE										1.71	0.87	1.44	2.48										3	300	70	20	70
D137681		USGS		Geochemistry of rock samples from the National Geochemical Database: U.S. Geological Survey, Reston, VA.	U.S. Geological Survey	USGS		46.75	-101.667	0.01	22	22	22	UNKNOWN	SEDIMENTARY	UNKNOWN	UNKNOWN	CLAYSTONE										2.07	0.64	0.75	3.16										5	300	50	15	70
D137682		USGS		Geochemistry of rock samples from the National Geochemical Database: U.S. Geological Survey, Reston, VA.	U.S. Geological Survey	USGS		46.75	-101.667	0.01	22	22	22	UNKNOWN	SEDIMENTARY	UNKNOWN	UNKNOWN	CLAYSTONE										2.43	0.64	1.37	3.18										3	300	30	15	70
D137683		USGS		Geochemistry of rock samples from the National Geochemical Database: U.S. Geological Survey, Reston, VA.	U.S. Geological Survey	USGS		46.75	-101.667	0.01	22	22	22	UNKNOWN	SEDIMENTARY	UNKNOWN	UNKNOWN	CLAYSTONE										3.08	2	1.98	3.26										5	1000	50	15	70
D137684		USGS		Geochemistry of rock samples from the National Geochemical Database: U.S. Geological Survey, Reston, VA.	U.S. Geological Survey	USGS		46.75	-101.667	0.01	22	22	22	UNKNOWN	SEDIMENTARY	UNKNOWN	UNKNOWN	CLAYSTONE										2.74	1.14	1.7	3.1										3	500	100	30	100
D137685		USGS		Geochemistry of rock samples from the National Geochemical Database: U.S. Geological Survey, Reston, VA.	U.S. Geological Survey	USGS		46.75	-101.667	0.01	22	22	22	UNKNOWN	SEDIMENTARY	UNKNOWN	UNKNOWN	CLAYSTONE										2.08	1.22	1.54	2.29										5	300	150	30	70
D137686		USGS		Geochemistry of rock samples from the National Geochemical Database: U.S. Geological Survey, Reston, VA.	U.S. Geological Survey	USGS		46.75	-101.667	0.01	22	22	22	UNKNOWN	SEDIMENTARY	UNKNOWN	UNKNOWN	CLAYSTONE										2.5	0.6	1.5	3.06										7	300	100	20	100
D137687		USGS		Geochemistry of rock samples from the National Geochemical Database: U.S. Geological Survey, Reston, VA.	U.S. Geological Survey	USGS		46.75	-101.667	0.01	22	22	22	UNKNOWN	SEDIMENTARY	UNKNOWN	UNKNOWN	CLAYSTONE										2.84	1.01	2.04	3.22										5	300	70	15	150
D137965		USGS		Geochemistry of rock samples from the National Geochemical Database: U.S. Geological Survey, Reston, VA.	U.S. Geological Survey	USGS		33.125	-100.875	0.01	59	59	59	UNKNOWN	SEDIMENTARY	UNKNOWN	UNKNOWN	CLAYSTONE																							2	200	30	10	30
D137966		USGS		Geochemistry of rock samples from the National Geochemical Database: U.S. Geological Survey, Reston, VA.	U.S. Geological Survey	USGS		33.125	-100.875	0.01	59	59	59	UNKNOWN	SEDIMENTARY	UNKNOWN	UNKNOWN	CLAYSTONE																							2	150	30	15	30
D137968		USGS		Geochemistry of rock samples from the National Geochemical Database: U.S. Geological Survey, Reston, VA.	U.S. Geological Survey	USGS		33.625	-100.75	0.01	59	59	59	UNKNOWN	SEDIMENTARY	UNKNOWN	UNKNOWN	CLAYSTONE																						10	2	150	7	7	20
D137979		USGS		Geochemistry of rock samples from the National Geochemical Database: U.S. Geological Survey, Reston, VA.	U.S. Geological Survey	USGS		34.375	-101.125	0.01	59	59	59	UNKNOWN	SEDIMENTARY	UNKNOWN	UNKNOWN	CLAYSTONE																						7	1.5	1000	15	30	50
D137983		USGS		Geochemistry of rock samples from the National Geochemical Database: U.S. Geological Survey, Reston, VA.	U.S. Geological Survey	USGS		33.375	-101.125	0.01	59	59	59	UNKNOWN	SEDIMENTARY	UNKNOWN	UNKNOWN	CLAYSTONE																							1.5	500	20	15	30
D138013		USGS		Geochemistry of rock samples from the National Geochemical Database: U.S. Geological Survey, Reston, VA.	U.S. Geological Survey	USGS		33.375	-101	0.01	59	59	59	UNKNOWN	SEDIMENTARY	UNKNOWN	UNKNOWN	CLAYSTONE																							2	1500	30	15	300
D139506		USGS		Geochemistry of rock samples from the National Geochemical Database: U.S. Geological Survey, Reston, VA.	U.S. Geological Survey	USGS		68.625	-158.375	0.01	56	56	56	ES	SEDIMENTARY	UNKNOWN	UNKNOWN	CLAYSTONE																							3	3000	70	20	150
D141100		USGS		Geochemistry of rock samples from the National Geochemical Database: U.S. Geological Survey, Reston, VA.	U.S. Geological Survey	USGS		43.7083	-110.5	0.01	8	8	8	UNKNOWN	SEDIMENTARY	UNKNOWN	UNKNOWN	CLAYSTONE																							1.5	150	15	7	15
D141101		USGS		Geochemistry of rock samples from the National Geochemical Database: U.S. Geological Survey, Reston, VA.	U.S. Geological Survey	USGS		43.7083	-110.5	0.01	8	8	8	UNKNOWN	SEDIMENTARY	UNKNOWN	UNKNOWN	CLAYSTONE																							1.5	150	5		7
D141102		USGS		Geochemistry of rock samples from the National Geochemical Database: U.S. Geological Survey, Reston, VA.	U.S. Geological Survey	USGS		43.7083	-110.5	0.01	8	8	8	UNKNOWN	SEDIMENTARY	UNKNOWN	UNKNOWN	CLAYSTONE																						10	1	200	10	3	7
D141103		USGS		Geochemistry of rock samples from the National Geochemical Database: U.S. Geological Survey, Reston, VA.	U.S. Geological Survey	USGS		43.7083	-110.5	0.01	8	8	8	UNKNOWN	SEDIMENTARY	UNKNOWN	UNKNOWN	CLAYSTONE																							1	150	7	3	15
D141104		USGS		Geochemistry of rock samples from the National Geochemical Database: U.S. Geological Survey, Reston, VA.	U.S. Geological Survey	USGS		43.7083	-110.5	0.01	8	8	8	UNKNOWN	SEDIMENTARY	UNKNOWN	UNKNOWN	CLAYSTONE																						10	1	500	15	10	10
D141105		USGS		Geochemistry of rock samples from the National Geochemical Database: U.S. Geological Survey, Reston, VA.	U.S. Geological Survey	USGS		43.7083	-110.5	0.01	8	8	8	UNKNOWN	SEDIMENTARY	UNKNOWN	UNKNOWN	CLAYSTONE																						3	1	150	5	3	5
D141106		USGS		Geochemistry of rock samples from the National Geochemical Database: U.S. Geological Survey, Reston, VA.	U.S. Geological Survey	USGS		43.7083	-110.5	0.01	8	8	8	UNKNOWN	SEDIMENTARY	UNKNOWN	UNKNOWN	CLAYSTONE																						3	1	100	5		5
D141107		USGS		Geochemistry of rock samples from the National Geochemical Database: U.S. Geological Survey, Reston, VA.	U.S. Geological Survey	USGS		43.7083	-110.5	0.01	8	8	8	UNKNOWN	SEDIMENTARY	UNKNOWN	UNKNOWN	CLAYSTONE																							3	100	15	3	10
D141108		USGS		Geochemistry of rock samples from the National Geochemical Database: U.S. Geological Survey, Reston, VA.	U.S. Geological Survey	USGS		43.5417	-110.625	0.01	8	8	8	UNKNOWN	SEDIMENTARY	UNKNOWN	UNKNOWN	CLAYSTONE																							2	100	15	10	30
D141109		USGS		Geochemistry of rock samples from the National Geochemical Database: U.S. Geological Survey, Reston, VA.	U.S. Geological Survey	USGS		43.5417	-110.625	0.01	8	8	8	UNKNOWN	SEDIMENTARY	UNKNOWN	UNKNOWN	CLAYSTONE																							2	100	15	7	30
D141231		USGS		Geochemistry of rock samples from the National Geochemical Database: U.S. Geological Survey, Reston, VA.	U.S. Geological Survey	USGS		43.125	-110.375	0.01	22	22	22	UNKNOWN	SEDIMENTARY	UNKNOWN	UNKNOWN	CLAYSTONE																							2	1000	7	5	10
D141233		USGS		Geochemistry of rock samples from the National Geochemical Database: U.S. Geological Survey, Reston, VA.	U.S. Geological Survey	USGS		43.875	-110.375	0.01	65	65	65	UNKNOWN	SEDIMENTARY	UNKNOWN	UNKNOWN	CLAYSTONE																							5	300	30	10	70
D141234		USGS		Geochemistry of rock samples from the National Geochemical Database: U.S. Geological Survey, Reston, VA.	U.S. Geological Survey	USGS		43.875	-110.375	0.01	65	65	65	UNKNOWN	SEDIMENTARY	UNKNOWN	UNKNOWN	CLAYSTONE																							5	300	30	10	50
D141235		USGS		Geochemistry of rock samples from the National Geochemical Database: U.S. Geological Survey, Reston, VA.	U.S. Geological Survey	USGS		43.875	-110.375	0.01	65	65	65	UNKNOWN	SEDIMENTARY	UNKNOWN	UNKNOWN	CLAYSTONE																							5	200	30	10	70
D141236		USGS		Geochemistry of rock samples from the National Geochemical Database: U.S. Geological Survey, Reston, VA.	U.S. Geological Survey	USGS		43.875	-110.375	0.01	65	65	65	UNKNOWN	SEDIMENTARY	UNKNOWN	UNKNOWN	CLAYSTONE																							3	200	30	15	70
D141237		USGS		Geochemistry of rock samples from the National Geochemical Database: U.S. Geological Survey, Reston, VA.	U.S. Geological Survey	USGS		43.375	-110.75	0.01	7	7	7	UNKNOWN	SEDIMENTARY	UNKNOWN	UNKNOWN	CLAYSTONE																							3	500	15	7	30
D141238		USGS		Geochemistry of rock samples from the National Geochemical Database: U.S. Geological Survey, Reston, VA.	U.S. Geological Survey	USGS		43.375	-110.75	0.01	7	7	7	UNKNOWN	SEDIMENTARY	UNKNOWN	UNKNOWN	CLAYSTONE																							1.5	500	20	10	20
D141239		USGS		Geochemistry of rock samples from the National Geochemical Database: U.S. Geological Survey, Reston, VA.	U.S. Geological Survey	USGS		44	-110.25	0.01	65	65	65	UNKNOWN	SEDIMENTARY	UNKNOWN	UNKNOWN	CLAYSTONE																							2	1000	30	15	30
D141240		USGS		Geochemistry of rock samples from the National Geochemical Database: U.S. Geological Survey, Reston, VA.	U.S. Geological Survey	USGS		44	-110.25	0.01	11	11	11	UNKNOWN	SEDIMENTARY	UNKNOWN	UNKNOWN	CLAYSTONE																							3	700	10	15	30
D141241		USGS		Geochemistry of rock samples from the National Geochemical Database: U.S. Geological Survey, Reston, VA.	U.S. Geological Survey	USGS		44	-110.25	0.01	11	11	11	UNKNOWN	SEDIMENTARY	UNKNOWN	UNKNOWN	CLAYSTONE																							3	1500	10	15	50
D141253		USGS		Geochemistry of rock samples from the National Geochemical Database: U.S. Geological Survey, Reston, VA.	U.S. Geological Survey	USGS		32.4222	-109.353	0.01	3	3	3	UNKNOWN	SEDIMENTARY	UNKNOWN	UNKNOWN	CLAYSTONE										3.95	13.1	2.07	2.74										3	700	30	15	30
D141405		USGS		Geochemistry of rock samples from the National Geochemical Database: U.S. Geological Survey, Reston, VA.	U.S. Geological Survey	USGS		71.125	-156.5	0.01	56	56	56	ES	SEDIMENTARY	UNKNOWN	UNKNOWN	CLAYSTONE																							7	150	50	15	30
D141410		USGS		Geochemistry of rock samples from the National Geochemical Database: U.S. Geological Survey, Reston, VA.	U.S. Geological Survey	USGS		71.125	-156.5	0.01	56	56	56	ES	SEDIMENTARY	UNKNOWN	UNKNOWN	CLAYSTONE																							3	100	30	7	20
D141411		USGS		Geochemistry of rock samples from the National Geochemical Database: U.S. Geological Survey, Reston, VA.	U.S. Geological Survey	USGS		70.9583	-155.875	0.01	65	65	65	ES	SEDIMENTARY	UNKNOWN	UNKNOWN	CLAYSTONE																							7	500	70	15	70
D143120		USGS		Geochemistry of rock samples from the National Geochemical Database: U.S. Geological Survey, Reston, VA.	U.S. Geological Survey	USGS		34.125	-104.125	0.01	59	59	59	UNKNOWN	SEDIMENTARY	UNKNOWN	UNKNOWN	CLAYSTONE																							2	300	30	15	30
D143142		USGS		Geochemistry of rock samples from the National Geochemical Database: U.S. Geological Survey, Reston, VA.	U.S. Geological Survey	USGS		35.625	-104.375	0.01	59	59	59	UNKNOWN	SEDIMENTARY	UNKNOWN	UNKNOWN	CLAYSTONE																							2	700	30	15	3000				3
D143144		USGS		Geochemistry of rock samples from the National Geochemical Database: U.S. Geological Survey, Reston, VA.	U.S. Geological Survey	USGS		35.625	-104.375	0.01	59	59	59	UNKNOWN	SEDIMENTARY	UNKNOWN	UNKNOWN	CLAYSTONE																							1.5	700	20	15	50
D144290		USGS		Geochemistry of rock samples from the National Geochemical Database: U.S. Geological Survey, Reston, VA.	U.S. Geological Survey	USGS		37.75	-114.5	0.01	8	8	8	UNKNOWN	SEDIMENTARY	UNKNOWN	UNKNOWN	CLAYSTONE																						10	1.5	700	15	5	15
D144291		USGS		Geochemistry of rock samples from the National Geochemical Database: U.S. Geological Survey, Reston, VA.	U.S. Geological Survey	USGS		37.75	-114.5	0.01	8	8	8	UNKNOWN	SEDIMENTARY	UNKNOWN	UNKNOWN	CLAYSTONE																							2	700	20	7	15
D144292		USGS		Geochemistry of rock samples from the National Geochemical Database: U.S. Geological Survey, Reston, VA.	U.S. Geological Survey	USGS		37.75	-114.5	0.01	8	8	8	UNKNOWN	SEDIMENTARY	UNKNOWN	UNKNOWN	CLAYSTONE																							1	500	7	3	10
D144293		USGS		Geochemistry of rock samples from the National Geochemical Database: U.S. Geological Survey, Reston, VA.	U.S. Geological Survey	USGS		37.75	-114.5	0.01	8	8	8	UNKNOWN	SEDIMENTARY	UNKNOWN	UNKNOWN	CLAYSTONE																							1.5	300	7	3	7
D144305		USGS		Geochemistry of rock samples from the National Geochemical Database: U.S. Geological Survey, Reston, VA.	U.S. Geological Survey	USGS		36.125	-114.875	0.01	8	8	8	UNKNOWN	SEDIMENTARY	UNKNOWN	UNKNOWN	CLAYSTONE																						10	0.7	1000	5	3	7
D144641		USGS		Geochemistry of rock samples from the National Geochemical Database: U.S. Geological Survey, Reston, VA.	U.S. Geological Survey	USGS		41.7667	-110.817	0.01	18	18	18	UNKNOWN	SEDIMENTARY	UNKNOWN	UNKNOWN	CLAYSTONE		52.3	0.46	9.8					0.04	2.4	12.3		1.5	0.37									1.6	380	30	11	23
D144642		USGS		Geochemistry of rock samples from the National Geochemical Database: U.S. Geological Survey, Reston, VA.	U.S. Geological Survey	USGS		39.2333	-108.15	0.01	18	18	18	UNKNOWN	SEDIMENTARY	UNKNOWN	UNKNOWN	CLAYSTONE		83.6	0.55	8.3					0.04	0.19	0.03	0.64	1.5										0.55	29	7		10
D144645		USGS		Geochemistry of rock samples from the National Geochemical Database: U.S. Geological Survey, Reston, VA.	U.S. Geological Survey	USGS		39.9333	-111.117	0.01	18	18	18	UNKNOWN	SEDIMENTARY	UNKNOWN	UNKNOWN	CLAYSTONE		54.1	0.59	11.3					0.04	3.8	9.1	0.54	2.1	0.15									2	410	27	12	49
D144653		USGS		Geochemistry of rock samples from the National Geochemical Database: U.S. Geological Survey, Reston, VA.	U.S. Geological Survey	USGS		41.1833	-108.833	0.01	18	18	18	UNKNOWN	SEDIMENTARY	UNKNOWN	UNKNOWN	CLAYSTONE		66.9	0.57	14.6					0.02	2.1	0.76	0.8	3.2	0.15									2.6	160	28	12	32
D144654		USGS		Geochemistry of rock samples from the National Geochemical Database: U.S. Geological Survey, Reston, VA.	U.S. Geological Survey	USGS		36.3833	-106.867	0.01	18	18	18	UNKNOWN	SEDIMENTARY	UNKNOWN	UNKNOWN	CLAYSTONE		73.8	0.73	12.3					0.04	0.76	0.03		2	0.02									1.8	100	15		20
D144656		USGS		Geochemistry of rock samples from the National Geochemical Database: U.S. Geological Survey, Reston, VA.	U.S. Geological Survey	USGS		39.9333	-111.067	0.01	18	18	18	UNKNOWN	SEDIMENTARY	UNKNOWN	UNKNOWN	CLAYSTONE		49.3	0.54	10.5					0.04	2.8	13.3	0.48	1.7	0.15									1.8	540	25	13	29
D144667		USGS		Geochemistry of rock samples from the National Geochemical Database: U.S. Geological Survey, Reston, VA.	U.S. Geological Survey	USGS		41.7667	-105.333	0.01	18	18	18	UNKNOWN	SEDIMENTARY	UNKNOWN	UNKNOWN	CLAYSTONE		66.9	0.62	15					0.04	1.5	0.96	0.32	2.8	0.18									2.5	330	28	11	28
D144698		USGS		Geochemistry of rock samples from the National Geochemical Database: U.S. Geological Survey, Reston, VA.	U.S. Geological Survey	USGS		44.6333	-105.7	0.01	18	18	18	UNKNOWN	SEDIMENTARY	UNKNOWN	UNKNOWN	CLAYSTONE		62.3	0.73	17.1					0.02	1.7	1	0.19	2.5	0.17									2.7	130	35	13	37
D144700		USGS		Geochemistry of rock samples from the National Geochemical Database: U.S. Geological Survey, Reston, VA.	U.S. Geological Survey	USGS		41.7667	-105.3	0.01	18	18	18	UNKNOWN	SEDIMENTARY	UNKNOWN	UNKNOWN	CLAYSTONE		73.4	0.76	14.5					0.02	0.67	0.14	0.06	1.8	0.04									0.73	28	13		13
D144747		USGS		Geochemistry of rock samples from the National Geochemical Database: U.S. Geological Survey, Reston, VA.	U.S. Geological Survey	USGS		42.0167	-106.483	0.01	18	18	18	UNKNOWN	SEDIMENTARY	UNKNOWN	UNKNOWN	CLAYSTONE		74	0.71	13.4					0.03	0.5	1	0.56	2.6	0.06									0.76	30	12		24
D144758		USGS		Geochemistry of rock samples from the National Geochemical Database: U.S. Geological Survey, Reston, VA.	U.S. Geological Survey	USGS		42.0167	-106.483	0.01	18	18	18	UNKNOWN	SEDIMENTARY	UNKNOWN	UNKNOWN	CLAYSTONE		77.3	0.46	11.1					0.03	0.48	1.4	0.95	2.5	0.04									0.71	25	9		13
D144772		USGS		Geochemistry of rock samples from the National Geochemical Database: U.S. Geological Survey, Reston, VA.	U.S. Geological Survey	USGS		41.7667	-105.3	0.01	18	18	18	UNKNOWN	SEDIMENTARY	UNKNOWN	UNKNOWN	CLAYSTONE		63.4	0.71	19					0.04	1.5	0.97	0.18	2.6	0.06									1.3	100	33	15	70
D144787		USGS		Geochemistry of rock samples from the National Geochemical Database: U.S. Geological Survey, Reston, VA.	U.S. Geological Survey	USGS		42.0167	-106.483	0.01	18	18	18	UNKNOWN	SEDIMENTARY	UNKNOWN	UNKNOWN	CLAYSTONE		64.5	0.79	18.3						0.96	0.26	0.49	3	0.07									1.7	42	19	13	24
D144797		USGS		Geochemistry of rock samples from the National Geochemical Database: U.S. Geological Survey, Reston, VA.	U.S. Geological Survey	USGS		44.2333	-106.417	0.01	18	18	18	UNKNOWN	SEDIMENTARY	UNKNOWN	UNKNOWN	CLAYSTONE		74.3	0.54	12.5					0.05	1.2	0.19	0.51	2.7	0.09									1.6	160	22	10	24
D144814		USGS		Geochemistry of rock samples from the National Geochemical Database: U.S. Geological Survey, Reston, VA.	U.S. Geological Survey	USGS		41.7833	-105.317	0.01	18	18	18	UNKNOWN	SEDIMENTARY	UNKNOWN	UNKNOWN	CLAYSTONE		63.8	0.72	18.4					0.02	1.2	0.24	0.21	2.7	0.08									1.7	56	13	8	30
D144826		USGS		Geochemistry of rock samples from the National Geochemical Database: U.S. Geological Survey, Reston, VA.	U.S. Geological Survey	USGS		42.0167	-106.483	0.01	18	18	18	UNKNOWN	SEDIMENTARY	UNKNOWN	UNKNOWN	CLAYSTONE		72.4	0.62	15.2					0.03	0.6	0.36	1.2	3.1	0.04									0.85	39	15		20
D144839		USGS		Geochemistry of rock samples from the National Geochemical Database: U.S. Geological Survey, Reston, VA.	U.S. Geological Survey	USGS		42.0167	-106.483	0.01	18	18	18	UNKNOWN	SEDIMENTARY	UNKNOWN	UNKNOWN	CLAYSTONE		74.5	0.71	14						0.63	0.14	0.41	2.7										0.85	34	11		24
D144854		USGS		Geochemistry of rock samples from the National Geochemical Database: U.S. Geological Survey, Reston, VA.	U.S. Geological Survey	USGS		42.0167	-106.483	0.01	18	18	18	UNKNOWN	SEDIMENTARY	UNKNOWN	UNKNOWN	CLAYSTONE		71.6	0.73	14						0.9	0.53	0.72	2.7										1.6	44	13		20
D144867		USGS		Geochemistry of rock samples from the National Geochemical Database: U.S. Geological Survey, Reston, VA.	U.S. Geological Survey	USGS		44.2333	-106.417	0.01	18	18	18	UNKNOWN	SEDIMENTARY	UNKNOWN	UNKNOWN	CLAYSTONE		64.6	0.6	12.3					0.08	2.6	3	0.53	2.7	0.13									3.4	770	20	9	30
D146730		USGS		Geochemistry of rock samples from the National Geochemical Database: U.S. Geological Survey, Reston, VA.	U.S. Geological Survey	USGS		69.95	-126.883	0.01				UNKNOWN	SEDIMENTARY	UNKNOWN	UNKNOWN	CLAYSTONE																							2	150			10		300
D147932		USGS		Geochemistry of rock samples from the National Geochemical Database: U.S. Geological Survey, Reston, VA.	U.S. Geological Survey	USGS		34.875	-104.625	0.01	59	59	59	UNKNOWN	SEDIMENTARY	UNKNOWN	UNKNOWN	CLAYSTONE																							1.5	30	20	7	100
D147938		USGS		Geochemistry of rock samples from the National Geochemical Database: U.S. Geological Survey, Reston, VA.	U.S. Geological Survey	USGS		34.875	-103.625	0.01	59	59	59	UNKNOWN	SEDIMENTARY	UNKNOWN	UNKNOWN	CLAYSTONE																							1.5	700	50	15	50
D147939		USGS		Geochemistry of rock samples from the National Geochemical Database: U.S. Geological Survey, Reston, VA.	U.S. Geological Survey	USGS		35.625	-104.375	0.01	59	59	59	UNKNOWN	SEDIMENTARY	UNKNOWN	UNKNOWN	CLAYSTONE																							2	500	20	15	100
D147940		USGS		Geochemistry of rock samples from the National Geochemical Database: U.S. Geological Survey, Reston, VA.	U.S. Geological Survey	USGS		35.625	-104.25	0.01	59	59	59	UNKNOWN	SEDIMENTARY	UNKNOWN	UNKNOWN	CLAYSTONE																							1.5	300	20	30	300
D147948		USGS		Geochemistry of rock samples from the National Geochemical Database: U.S. Geological Survey, Reston, VA.	U.S. Geological Survey	USGS		35.125	-103.75	0.01	56	56	56	UNKNOWN	SEDIMENTARY	UNKNOWN	UNKNOWN	CLAYSTONE																							2	100		3	15
D149673		USGS		Geochemistry of rock samples from the National Geochemical Database: U.S. Geological Survey, Reston, VA.	U.S. Geological Survey	USGS		35.375	-102.875	0.01	59	59	59	UNKNOWN	SEDIMENTARY	UNKNOWN	UNKNOWN	CLAYSTONE																						10	3	50	10		70
D149674		USGS		Geochemistry of rock samples from the National Geochemical Database: U.S. Geological Survey, Reston, VA.	U.S. Geological Survey	USGS		33.125	-103.375	0.01	59	59	59	UNKNOWN	SEDIMENTARY	UNKNOWN	UNKNOWN	CLAYSTONE																							1.5	300	30	15	15
D149690		USGS		Geochemistry of rock samples from the National Geochemical Database: U.S. Geological Survey, Reston, VA.	U.S. Geological Survey	USGS		36.875	-103.25	0.01	59	59	59	UNKNOWN	SEDIMENTARY	UNKNOWN	UNKNOWN	CLAYSTONE																						10	3	300	20	7	150
D154722		USGS		Geochemistry of rock samples from the National Geochemical Database: U.S. Geological Survey, Reston, VA.	U.S. Geological Survey	USGS		40.2667	-116.867	0.01	55	55	55	UNKNOWN	SEDIMENTARY	UNKNOWN	UNKNOWN	CLAYSTONE																							0.3	15			20
D154724		USGS		Geochemistry of rock samples from the National Geochemical Database: U.S. Geological Survey, Reston, VA.	U.S. Geological Survey	USGS		40.2667	-116.867	0.01	55	55	55	UNKNOWN	SEDIMENTARY	UNKNOWN	UNKNOWN	CLAYSTONE																							1	15			50
D154725		USGS		Geochemistry of rock samples from the National Geochemical Database: U.S. Geological Survey, Reston, VA.	U.S. Geological Survey	USGS		40.2667	-116.867	0.01	55	55	55	UNKNOWN	SEDIMENTARY	UNKNOWN	UNKNOWN	CLAYSTONE																							0.5	50			30
D155236		USGS		Geochemistry of rock samples from the National Geochemical Database: U.S. Geological Survey, Reston, VA.	U.S. Geological Survey	USGS		45.75	-107.375	0.01	65	65	65	UNKNOWN	SEDIMENTARY	UNKNOWN	UNKNOWN	CLAYSTONE																							5	100	30		700				2
D155237		USGS		Geochemistry of rock samples from the National Geochemical Database: U.S. Geological Survey, Reston, VA.	U.S. Geological Survey	USGS		45	-108.75	0.01	65	65	65	UNKNOWN	SEDIMENTARY	UNKNOWN	UNKNOWN	CLAYSTONE																							5	150	30		1000
D155238		USGS		Geochemistry of rock samples from the National Geochemical Database: U.S. Geological Survey, Reston, VA.	U.S. Geological Survey	USGS		44.875	-108.75	0.01	65	65	65	UNKNOWN	SEDIMENTARY	UNKNOWN	UNKNOWN	CLAYSTONE																							5	150	30	15	700
D155239		USGS		Geochemistry of rock samples from the National Geochemical Database: U.S. Geological Survey, Reston, VA.	U.S. Geological Survey	USGS		45.625	-109.125	0.01	65	65	65	UNKNOWN	SEDIMENTARY	UNKNOWN	UNKNOWN	CLAYSTONE																							5	150	50		700				2
D155240		USGS		Geochemistry of rock samples from the National Geochemical Database: U.S. Geological Survey, Reston, VA.	U.S. Geological Survey	USGS		45.5	-109.125	0.01	65	65	65	UNKNOWN	SEDIMENTARY	UNKNOWN	UNKNOWN	CLAYSTONE																							7	100	30	10	700				3
D155243		USGS		Geochemistry of rock samples from the National Geochemical Database: U.S. Geological Survey, Reston, VA.	U.S. Geological Survey	USGS		47.75	-109.5	0.01	65	65	65	UNKNOWN	SEDIMENTARY	UNKNOWN	UNKNOWN	CLAYSTONE																							7	150	20	10	1000		700
D158429		USGS		Geochemistry of rock samples from the National Geochemical Database: U.S. Geological Survey, Reston, VA.	U.S. Geological Survey	USGS		40.6156	-79.8139	0.01	70	70	70	UNKNOWN	SEDIMENTARY	UNKNOWN	UNKNOWN	CLAYSTONE		57.6	1	20		6		0.64	0.05	1.3	0.61	0.28	3.1	0.21									3	70	30	7	70
D158440		USGS		Geochemistry of rock samples from the National Geochemical Database: U.S. Geological Survey, Reston, VA.	U.S. Geological Survey	USGS		40.1872	-80.2308	0.01	71	70.5	70	UNKNOWN	SEDIMENTARY	UNKNOWN	UNKNOWN	CLAYSTONE		57.3	1.1	22.6		2.4		0.8	0.04	0.82	1.5	0.25	2.6	0.06									1	50	20	7	70
D160981		USGS		Geochemistry of rock samples from the National Geochemical Database: U.S. Geological Survey, Reston, VA.	U.S. Geological Survey	USGS		44.25	-105.375	0.01	22	22	22	UNKNOWN	SEDIMENTARY	UNKNOWN	UNKNOWN	CLAYSTONE																							1	50	15		70
D163188		USGS		Geochemistry of rock samples from the National Geochemical Database: U.S. Geological Survey, Reston, VA.	U.S. Geological Survey	USGS		45.75	-106.5	0.01	22	22	22	UNKNOWN	SEDIMENTARY	UNKNOWN	UNKNOWN	CLAYSTONE		61.3		8.15						0.43	0.301	0.08	2.84										0.7	30	3
D163161		USGS		Geochemistry of rock samples from the National Geochemical Database: U.S. Geological Survey, Reston, VA.	U.S. Geological Survey	USGS		40.6681	-80.0764	0.01	70	70	70	UNKNOWN	SEDIMENTARY	UNKNOWN	UNKNOWN	CLAYSTONE		59.2	1	19.7		5.7		0.36		1.2	0.65	0.17	2.3	0.11									5	100	70	15	50
D163163		USGS		Geochemistry of rock samples from the National Geochemical Database: U.S. Geological Survey, Reston, VA.	U.S. Geological Survey	USGS		40.9386	-80.0142	0.01	70	70	70	UNKNOWN	SEDIMENTARY	UNKNOWN	UNKNOWN	CLAYSTONE		65.5	1	15.5		6.4		0.24	0.04	1		0.24	2.3	0.17									5	700	50	20	50
D163165		USGS		Geochemistry of rock samples from the National Geochemical Database: U.S. Geological Survey, Reston, VA.	U.S. Geological Survey	USGS		41.0528	-79.8772	0.01	70	70	70	UNKNOWN	SEDIMENTARY	UNKNOWN	UNKNOWN	CLAYSTONE		65.4	1.2	17.7		4.1		0.88		1.2		0.25	2.8	0.06									5	300	50	15	30
D163167		USGS		Geochemistry of rock samples from the National Geochemical Database: U.S. Geological Survey, Reston, VA.	U.S. Geological Survey	USGS		41.0558	-79.8919	0.01	70	70	70	UNKNOWN	SEDIMENTARY	UNKNOWN	UNKNOWN	CLAYSTONE		61	1.5	23.8		1.5		0.64		0.73		0.31	2	0.04									1.5	20	30	7	20
D163170		USGS		Geochemistry of rock samples from the National Geochemical Database: U.S. Geological Survey, Reston, VA.	U.S. Geological Survey	USGS		41.0558	-79.8919	0.01	70	70	70	UNKNOWN	SEDIMENTARY	UNKNOWN	UNKNOWN	CLAYSTONE																							1.5	20	20	5	15
D163189		USGS		Geochemistry of rock samples from the National Geochemical Database: U.S. Geological Survey, Reston, VA.	U.S. Geological Survey	USGS		45.75	-106.5	0.01	22	22	22	UNKNOWN	SEDIMENTARY	UNKNOWN	UNKNOWN	CLAYSTONE		72.2		14.2						1.9	0.249	0.54	4.05	0.128									2	70	15	7
D163192		USGS		Geochemistry of rock samples from the National Geochemical Database: U.S. Geological Survey, Reston, VA.	U.S. Geological Survey	USGS		45.75	-106.5	0.01	22	22	22	UNKNOWN	SEDIMENTARY	UNKNOWN	UNKNOWN	CLAYSTONE		36.5		13.4						0.55	0.518	0.1											0.3	150			70
D163272		USGS		Geochemistry of rock samples from the National Geochemical Database: U.S. Geological Survey, Reston, VA.	U.S. Geological Survey	USGS		40.3	-111.2	0.01	71	71	71	UNKNOWN	SEDIMENTARY	UNKNOWN	UNKNOWN	CLAYSTONE																							1	70	70		70		300
D163273		USGS		Geochemistry of rock samples from the National Geochemical Database: U.S. Geological Survey, Reston, VA.	U.S. Geological Survey	USGS		40.3	-111.2	0.01	71	71	71	UNKNOWN	SEDIMENTARY	UNKNOWN	UNKNOWN	CLAYSTONE																							1	70	70	5	100		500
D163274		USGS		Geochemistry of rock samples from the National Geochemical Database: U.S. Geological Survey, Reston, VA.	U.S. Geological Survey	USGS		40.3	-111.2	0.01	71	71	71	UNKNOWN	SEDIMENTARY	UNKNOWN	UNKNOWN	CLAYSTONE																							0.3	50	15		20
D163275		USGS		Geochemistry of rock samples from the National Geochemical Database: U.S. Geological Survey, Reston, VA.	U.S. Geological Survey	USGS		40.3	-111.2	0.01	71	71	71	UNKNOWN	SEDIMENTARY	UNKNOWN	UNKNOWN	CLAYSTONE																							0.2	50	20		20
D163276		USGS		Geochemistry of rock samples from the National Geochemical Database: U.S. Geological Survey, Reston, VA.	U.S. Geological Survey	USGS		40.3	-111.2	0.01	71	71	71	UNKNOWN	SEDIMENTARY	UNKNOWN	UNKNOWN	CLAYSTONE																						7	0.15	70	10		10
D163277		USGS		Geochemistry of rock samples from the National Geochemical Database: U.S. Geological Survey, Reston, VA.	U.S. Geological Survey	USGS		40.3	-111.2	0.01	71	71	71	UNKNOWN	SEDIMENTARY	UNKNOWN	UNKNOWN	CLAYSTONE																						7	0.2	50	15		10
D163278		USGS		Geochemistry of rock samples from the National Geochemical Database: U.S. Geological Survey, Reston, VA.	U.S. Geological Survey	USGS		40.3	-111.2	0.01	71	71	71	UNKNOWN	SEDIMENTARY	UNKNOWN	UNKNOWN	CLAYSTONE																						7	0.15	50	15		15
D163279		USGS		Geochemistry of rock samples from the National Geochemical Database: U.S. Geological Survey, Reston, VA.	U.S. Geological Survey	USGS		40.3	-111.2	0.01	71	71	71	UNKNOWN	SEDIMENTARY	UNKNOWN	UNKNOWN	CLAYSTONE																							0.5	20	15		15				0.5
D163280		USGS		Geochemistry of rock samples from the National Geochemical Database: U.S. Geological Survey, Reston, VA.	U.S. Geological Survey	USGS		40.3	-111.2	0.01	71	71	71	UNKNOWN	SEDIMENTARY	UNKNOWN	UNKNOWN	CLAYSTONE																							1	70	20		10				1.5
D163281		USGS		Geochemistry of rock samples from the National Geochemical Database: U.S. Geological Survey, Reston, VA.	U.S. Geological Survey	USGS		40.3	-111.2	0.01	71	71	71	UNKNOWN	SEDIMENTARY	UNKNOWN	UNKNOWN	CLAYSTONE																							1	70	20		15				0.5
D163538		USGS		Geochemistry of rock samples from the National Geochemical Database: U.S. Geological Survey, Reston, VA.	U.S. Geological Survey	USGS		43.0667	-112.1	0.01	71	71	71	UNKNOWN	SEDIMENTARY	UNKNOWN	UNKNOWN	CLAYSTONE																							0.3	70	150		150		700
D163539		USGS		Geochemistry of rock samples from the National Geochemical Database: U.S. Geological Survey, Reston, VA.	U.S. Geological Survey	USGS		43.0667	-112.1	0.01	71	71	71	UNKNOWN	SEDIMENTARY	UNKNOWN	UNKNOWN	CLAYSTONE																							0.3	70	150		70		1000
D163540		USGS		Geochemistry of rock samples from the National Geochemical Database: U.S. Geological Survey, Reston, VA.	U.S. Geological Survey	USGS		43.0667	-112.1	0.01	71	71	71	UNKNOWN	SEDIMENTARY	UNKNOWN	UNKNOWN	CLAYSTONE																							1	500	200		150		1000
D163541		USGS		Geochemistry of rock samples from the National Geochemical Database: U.S. Geological Survey, Reston, VA.	U.S. Geological Survey	USGS		43.0667	-112.1	0.01	71	71	71	UNKNOWN	SEDIMENTARY	UNKNOWN	UNKNOWN	CLAYSTONE																							1	1000	300		150		1500
D163542		USGS		Geochemistry of rock samples from the National Geochemical Database: U.S. Geological Survey, Reston, VA.	U.S. Geological Survey	USGS		43.0667	-112.1	0.01	71	71	71	UNKNOWN	SEDIMENTARY	UNKNOWN	UNKNOWN	CLAYSTONE																							1.5	150	200	10	150		700
D163543		USGS		Geochemistry of rock samples from the National Geochemical Database: U.S. Geological Survey, Reston, VA.	U.S. Geological Survey	USGS		43.0667	-112.1	0.01	71	71	71	UNKNOWN	SEDIMENTARY	UNKNOWN	UNKNOWN	CLAYSTONE																							2	70	150		70		700		3
D163552		USGS		Geochemistry of rock samples from the National Geochemical Database: U.S. Geological Survey, Reston, VA.	U.S. Geological Survey	USGS		42.55	-111.233	0.01	71	71	71	UNKNOWN	SEDIMENTARY	UNKNOWN	UNKNOWN	CLAYSTONE																							1.5	70	150		70		1000		7
D163554		USGS		Geochemistry of rock samples from the National Geochemical Database: U.S. Geological Survey, Reston, VA.	U.S. Geological Survey	USGS		42.55	-111.233	0.01	71	71	71	UNKNOWN	SEDIMENTARY	UNKNOWN	UNKNOWN	CLAYSTONE																							1.5	50	150		200				20
D163555		USGS		Geochemistry of rock samples from the National Geochemical Database: U.S. Geological Survey, Reston, VA.	U.S. Geological Survey	USGS		42.55	-111.233	0.01	71	71	71	UNKNOWN	SEDIMENTARY	UNKNOWN	UNKNOWN	CLAYSTONE																							3	15	300		150
D163556		USGS		Geochemistry of rock samples from the National Geochemical Database: U.S. Geological Survey, Reston, VA.	U.S. Geological Survey	USGS		42.55	-111.233	0.01	71	71	71	UNKNOWN	SEDIMENTARY	UNKNOWN	UNKNOWN	CLAYSTONE																							1	15	150		150				7
D163557		USGS		Geochemistry of rock samples from the National Geochemical Database: U.S. Geological Survey, Reston, VA.	U.S. Geological Survey	USGS		42.55	-111.233	0.01	71	71	71	UNKNOWN	SEDIMENTARY	UNKNOWN	UNKNOWN	CLAYSTONE																							1.5	70	150		100				5
D163559		USGS		Geochemistry of rock samples from the National Geochemical Database: U.S. Geological Survey, Reston, VA.	U.S. Geological Survey	USGS		42.55	-111.233	0.01	71	71	71	UNKNOWN	SEDIMENTARY	UNKNOWN	UNKNOWN	CLAYSTONE																							1.5	50	100		70				3
D163560		USGS		Geochemistry of rock samples from the National Geochemical Database: U.S. Geological Survey, Reston, VA.	U.S. Geological Survey	USGS		42.55	-111.233	0.01	71	71	71	UNKNOWN	SEDIMENTARY	UNKNOWN	UNKNOWN	CLAYSTONE																							2	200	150	15	100		700		3
D163562		USGS		Geochemistry of rock samples from the National Geochemical Database: U.S. Geological Survey, Reston, VA.	U.S. Geological Survey	USGS		42.55	-111.233	0.01	71	71	71	UNKNOWN	SEDIMENTARY	UNKNOWN	UNKNOWN	CLAYSTONE																							1.5	100	150		50				3
D163632		USGS		Geochemistry of rock samples from the National Geochemical Database: U.S. Geological Survey, Reston, VA.	U.S. Geological Survey	USGS		40.6167	-111.25	0.01	71	71	71	UNKNOWN	SEDIMENTARY	UNKNOWN	UNKNOWN	CLAYSTONE																							1	70	100		70		700		3
D163633		USGS		Geochemistry of rock samples from the National Geochemical Database: U.S. Geological Survey, Reston, VA.	U.S. Geological Survey	USGS		40.6167	-111.25	0.01	71	71	71	UNKNOWN	SEDIMENTARY	UNKNOWN	UNKNOWN	CLAYSTONE																							1.5	150	150		70		700		5
D163634		USGS		Geochemistry of rock samples from the National Geochemical Database: U.S. Geological Survey, Reston, VA.	U.S. Geological Survey	USGS		40.6167	-111.25	0.01	71	71	71	UNKNOWN	SEDIMENTARY	UNKNOWN	UNKNOWN	CLAYSTONE																							1.5	150	150		70		700		7
D163636		USGS		Geochemistry of rock samples from the National Geochemical Database: U.S. Geological Survey, Reston, VA.	U.S. Geological Survey	USGS		40.6167	-111.25	0.01	71	71	71	UNKNOWN	SEDIMENTARY	UNKNOWN	UNKNOWN	CLAYSTONE																							2	150	70		70		700		1
D163637		USGS		Geochemistry of rock samples from the National Geochemical Database: U.S. Geological Survey, Reston, VA.	U.S. Geological Survey	USGS		40.6167	-111.25	0.01	71	71	71	UNKNOWN	SEDIMENTARY	UNKNOWN	UNKNOWN	CLAYSTONE																							3	150	70		20
D163639		USGS		Geochemistry of rock samples from the National Geochemical Database: U.S. Geological Survey, Reston, VA.	U.S. Geological Survey	USGS		40.6167	-111.25	0.01	71	71	71	UNKNOWN	SEDIMENTARY	UNKNOWN	UNKNOWN	CLAYSTONE																							1.5	100	150		70		1500		2
D163640		USGS		Geochemistry of rock samples from the National Geochemical Database: U.S. Geological Survey, Reston, VA.	U.S. Geological Survey	USGS		40.6167	-111.25	0.01	71	71	71	UNKNOWN	SEDIMENTARY	UNKNOWN	UNKNOWN	CLAYSTONE																							1	70	70		70	100	1500		3
D163641		USGS		Geochemistry of rock samples from the National Geochemical Database: U.S. Geological Survey, Reston, VA.	U.S. Geological Survey	USGS		40.6167	-111.25	0.01	71	71	71	UNKNOWN	SEDIMENTARY	UNKNOWN	UNKNOWN	CLAYSTONE																							1.5	70	50		30		1000		3
D163642		USGS		Geochemistry of rock samples from the National Geochemical Database: U.S. Geological Survey, Reston, VA.	U.S. Geological Survey	USGS		40.6167	-111.25	0.01	71	71	71	UNKNOWN	SEDIMENTARY	UNKNOWN	UNKNOWN	CLAYSTONE																							1.5	100	50		20				3
D163643		USGS		Geochemistry of rock samples from the National Geochemical Database: U.S. Geological Survey, Reston, VA.	U.S. Geological Survey	USGS		40.6167	-111.25	0.01	71	71	71	UNKNOWN	SEDIMENTARY	UNKNOWN	UNKNOWN	CLAYSTONE																							1.5	70	50		20				5
D163644		USGS		Geochemistry of rock samples from the National Geochemical Database: U.S. Geological Survey, Reston, VA.	U.S. Geological Survey	USGS		40.6167	-111.25	0.01	71	71	71	UNKNOWN	SEDIMENTARY	UNKNOWN	UNKNOWN	CLAYSTONE																							1.5	70	50		15				2
D163651		USGS		Geochemistry of rock samples from the National Geochemical Database: U.S. Geological Survey, Reston, VA.	U.S. Geological Survey	USGS		43.7167	-110.6	0.01	8	8	8	UNKNOWN	SEDIMENTARY	UNKNOWN	UNKNOWN	CLAYSTONE																							1.5	200	10		15
D163652		USGS		Geochemistry of rock samples from the National Geochemical Database: U.S. Geological Survey, Reston, VA.	U.S. Geological Survey	USGS		43.7167	-110.6	0.01	8	8	8	UNKNOWN	SEDIMENTARY	UNKNOWN	UNKNOWN	CLAYSTONE																						10	0.7	200	7		10
D163653		USGS		Geochemistry of rock samples from the National Geochemical Database: U.S. Geological Survey, Reston, VA.	U.S. Geological Survey	USGS		43.7167	-110.6	0.01	8	8	8	UNKNOWN	SEDIMENTARY	UNKNOWN	UNKNOWN	CLAYSTONE										10	21	0.37	1.09									10	1.5	150	10	5	15
D163654		USGS		Geochemistry of rock samples from the National Geochemical Database: U.S. Geological Survey, Reston, VA.	U.S. Geological Survey	USGS		43.7167	-110.6	0.01	8	8	8	UNKNOWN	SEDIMENTARY	UNKNOWN	UNKNOWN	CLAYSTONE																						10	0.7	200	7		10
D163656		USGS		Geochemistry of rock samples from the National Geochemical Database: U.S. Geological Survey, Reston, VA.	U.S. Geological Survey	USGS		43.7167	-110.6	0.01	8	8	8	UNKNOWN	SEDIMENTARY	UNKNOWN	UNKNOWN	CLAYSTONE																							1.5	200	5		7
D163657		USGS		Geochemistry of rock samples from the National Geochemical Database: U.S. Geological Survey, Reston, VA.	U.S. Geological Survey	USGS		43.7167	-110.6	0.01	8	8	8	UNKNOWN	SEDIMENTARY	UNKNOWN	UNKNOWN	CLAYSTONE																							2	300	15	7	15
D163658		USGS		Geochemistry of rock samples from the National Geochemical Database: U.S. Geological Survey, Reston, VA.	U.S. Geological Survey	USGS		43.7167	-110.6	0.01	8	8	8	UNKNOWN	SEDIMENTARY	UNKNOWN	UNKNOWN	CLAYSTONE																						10	1	150	5		7
D163659		USGS		Geochemistry of rock samples from the National Geochemical Database: U.S. Geological Survey, Reston, VA.	U.S. Geological Survey	USGS		43.7167	-110.6	0.01	8	8	8	UNKNOWN	SEDIMENTARY	UNKNOWN	UNKNOWN	CLAYSTONE																							1	300			7
D163660		USGS		Geochemistry of rock samples from the National Geochemical Database: U.S. Geological Survey, Reston, VA.	U.S. Geological Survey	USGS		43.7167	-110.6	0.01	8	8	8	UNKNOWN	SEDIMENTARY	UNKNOWN	UNKNOWN	CLAYSTONE										15.8	20.7	0.33	0.67									7	0.7	150	5		7
D163661		USGS		Geochemistry of rock samples from the National Geochemical Database: U.S. Geological Survey, Reston, VA.	U.S. Geological Survey	USGS		43.7167	-110.6	0.01	8	8	8	UNKNOWN	SEDIMENTARY	UNKNOWN	UNKNOWN	CLAYSTONE										16.3	21.5	0.32	0.46									5	1	150			7
D163662		USGS		Geochemistry of rock samples from the National Geochemical Database: U.S. Geological Survey, Reston, VA.	U.S. Geological Survey	USGS		43.7167	-110.6	0.01	8	8	8	UNKNOWN	SEDIMENTARY	UNKNOWN	UNKNOWN	CLAYSTONE																						5	0.5	100			5
D163663		USGS		Geochemistry of rock samples from the National Geochemical Database: U.S. Geological Survey, Reston, VA.	U.S. Geological Survey	USGS		43.7167	-110.6	0.01	8	8	8	UNKNOWN	SEDIMENTARY	UNKNOWN	UNKNOWN	CLAYSTONE																						10	1	300	7	5	10
D163664		USGS		Geochemistry of rock samples from the National Geochemical Database: U.S. Geological Survey, Reston, VA.	U.S. Geological Survey	USGS		43.5833	-110.7	0.01	8	8	8	UNKNOWN	SEDIMENTARY	UNKNOWN	UNKNOWN	CLAYSTONE																							2	500	15	7	20
D163665		USGS		Geochemistry of rock samples from the National Geochemical Database: U.S. Geological Survey, Reston, VA.	U.S. Geological Survey	USGS		43.5833	-110.7	0.01	8	8	8	UNKNOWN	SEDIMENTARY	UNKNOWN	UNKNOWN	CLAYSTONE																							1.5	1000	10	5	20
D163666		USGS		Geochemistry of rock samples from the National Geochemical Database: U.S. Geological Survey, Reston, VA.	U.S. Geological Survey	USGS		43.5833	-110.7	0.01	8	8	8	UNKNOWN	SEDIMENTARY	UNKNOWN	UNKNOWN	CLAYSTONE																							1.5	700	15	7	30
D163667		USGS		Geochemistry of rock samples from the National Geochemical Database: U.S. Geological Survey, Reston, VA.	U.S. Geological Survey	USGS		43.2333	-111.083	0.01	8	8	8	UNKNOWN	SEDIMENTARY	UNKNOWN	UNKNOWN	CLAYSTONE																							2	700	15		7
D163668		USGS		Geochemistry of rock samples from the National Geochemical Database: U.S. Geological Survey, Reston, VA.	U.S. Geological Survey	USGS		42.2833	-108.867	0.01	18	18	18	UNKNOWN	SEDIMENTARY	UNKNOWN	UNKNOWN	CLAYSTONE																							3	300	50	15	50
D163671		USGS		Geochemistry of rock samples from the National Geochemical Database: U.S. Geological Survey, Reston, VA.	U.S. Geological Survey	USGS		42.6833	-107.767	0.01	18	18	18	UNKNOWN	SEDIMENTARY	UNKNOWN	UNKNOWN	CLAYSTONE																							2	100	30	7	20
D163686		USGS		Geochemistry of rock samples from the National Geochemical Database: U.S. Geological Survey, Reston, VA.	U.S. Geological Survey	USGS		40.7167	-111.75	0.01	71	71	71	UNKNOWN	SEDIMENTARY	UNKNOWN	UNKNOWN	CLAYSTONE																							0.5	70	10		7
D163687		USGS		Geochemistry of rock samples from the National Geochemical Database: U.S. Geological Survey, Reston, VA.	U.S. Geological Survey	USGS		40.7167	-111.75	0.01	71	71	71	UNKNOWN	SEDIMENTARY	UNKNOWN	UNKNOWN	CLAYSTONE																							0.15	30			2
D163688		USGS		Geochemistry of rock samples from the National Geochemical Database: U.S. Geological Survey, Reston, VA.	U.S. Geological Survey	USGS		40.7167	-111.75	0.01	71	71	71	UNKNOWN	SEDIMENTARY	UNKNOWN	UNKNOWN	CLAYSTONE																							0.5	70	10		3
D163689		USGS		Geochemistry of rock samples from the National Geochemical Database: U.S. Geological Survey, Reston, VA.	U.S. Geological Survey	USGS		40.7167	-111.75	0.01	71	71	71	UNKNOWN	SEDIMENTARY	UNKNOWN	UNKNOWN	CLAYSTONE																							0.5	30	10		5
D163701		USGS		Geochemistry of rock samples from the National Geochemical Database: U.S. Geological Survey, Reston, VA.	U.S. Geological Survey	USGS		40.7167	-111.75	0.01	71	71	71	UNKNOWN	SEDIMENTARY	UNKNOWN	UNKNOWN	CLAYSTONE																							0.5	50	15		7
D163702		USGS		Geochemistry of rock samples from the National Geochemical Database: U.S. Geological Survey, Reston, VA.	U.S. Geological Survey	USGS		40.7167	-111.75	0.01	71	71	71	UNKNOWN	SEDIMENTARY	UNKNOWN	UNKNOWN	CLAYSTONE																							0.5	70	15		5
D163703		USGS		Geochemistry of rock samples from the National Geochemical Database: U.S. Geological Survey, Reston, VA.	U.S. Geological Survey	USGS		40.7167	-111.75	0.01	71	71	71	UNKNOWN	SEDIMENTARY	UNKNOWN	UNKNOWN	CLAYSTONE																							1	100	20		10
D163704		USGS		Geochemistry of rock samples from the National Geochemical Database: U.S. Geological Survey, Reston, VA.	U.S. Geological Survey	USGS		40.7167	-111.75	0.01	71	71	71	UNKNOWN	SEDIMENTARY	UNKNOWN	UNKNOWN	CLAYSTONE																							1.5	70	30		30
D163716		USGS		Geochemistry of rock samples from the National Geochemical Database: U.S. Geological Survey, Reston, VA.	U.S. Geological Survey	USGS		41.05	-111.583	0.01	71	71	71	UNKNOWN	SEDIMENTARY	UNKNOWN	UNKNOWN	CLAYSTONE																							0.5	50	20		10				2
D163717		USGS		Geochemistry of rock samples from the National Geochemical Database: U.S. Geological Survey, Reston, VA.	U.S. Geological Survey	USGS		41.05	-111.583	0.01	71	71	71	UNKNOWN	SEDIMENTARY	UNKNOWN	UNKNOWN	CLAYSTONE																							0.5	70	20		7				1
D163774		USGS		Geochemistry of rock samples from the National Geochemical Database: U.S. Geological Survey, Reston, VA.	U.S. Geological Survey	USGS		42.7333	-111.533	0.01	71	71	71	UNKNOWN	SEDIMENTARY	UNKNOWN	UNKNOWN	CLAYSTONE																							1.5	70	150		150		700
D163775		USGS		Geochemistry of rock samples from the National Geochemical Database: U.S. Geological Survey, Reston, VA.	U.S. Geological Survey	USGS		42.7333	-111.533	0.01	71	71	71	UNKNOWN	SEDIMENTARY	UNKNOWN	UNKNOWN	CLAYSTONE																							1.5	100	100		70		700
D163804		USGS		Geochemistry of rock samples from the National Geochemical Database: U.S. Geological Survey, Reston, VA.	U.S. Geological Survey	USGS		43.4167	-111.417	0.01	71	71	71	UNKNOWN	SEDIMENTARY	UNKNOWN	UNKNOWN	CLAYSTONE																							0.3	100	30		7				3
D163808		USGS		Geochemistry of rock samples from the National Geochemical Database: U.S. Geological Survey, Reston, VA.	U.S. Geological Survey	USGS		40.4306	-112.293	0.01	70	69	68	UNKNOWN	SEDIMENTARY	UNKNOWN	UNKNOWN	CLAYSTONE																							1	100	15		7
D163813		USGS		Geochemistry of rock samples from the National Geochemical Database: U.S. Geological Survey, Reston, VA.	U.S. Geological Survey	USGS		40.4311	-112.293	0.01	70	69	68	UNKNOWN	SEDIMENTARY	UNKNOWN	UNKNOWN	CLAYSTONE																							1	300	20		7
D163814		USGS		Geochemistry of rock samples from the National Geochemical Database: U.S. Geological Survey, Reston, VA.	U.S. Geological Survey	USGS		40.4311	-112.293	0.01	70	69	68	UNKNOWN	SEDIMENTARY	UNKNOWN	UNKNOWN	CLAYSTONE																							1.5	300	10		3
D163816		USGS		Geochemistry of rock samples from the National Geochemical Database: U.S. Geological Survey, Reston, VA.	U.S. Geological Survey	USGS		40.4314	-112.293	0.01	70	69	68	UNKNOWN	SEDIMENTARY	UNKNOWN	UNKNOWN	CLAYSTONE																							1.5	150	30		10
D163818		USGS		Geochemistry of rock samples from the National Geochemical Database: U.S. Geological Survey, Reston, VA.	U.S. Geological Survey	USGS		40.4314	-112.301	0.01	70	69	68	UNKNOWN	SEDIMENTARY	UNKNOWN	UNKNOWN	CLAYSTONE																							1.5	300	15		5
D163819		USGS		Geochemistry of rock samples from the National Geochemical Database: U.S. Geological Survey, Reston, VA.	U.S. Geological Survey	USGS		40.4314	-112.301	0.01	70	69	68	UNKNOWN	SEDIMENTARY	UNKNOWN	UNKNOWN	CLAYSTONE																							1.5	200	20		10
D163820		USGS		Geochemistry of rock samples from the National Geochemical Database: U.S. Geological Survey, Reston, VA.	U.S. Geological Survey	USGS		40.4314	-112.301	0.01	70	69	68	UNKNOWN	SEDIMENTARY	UNKNOWN	UNKNOWN	CLAYSTONE																							1.5	300	20		7
D163821		USGS		Geochemistry of rock samples from the National Geochemical Database: U.S. Geological Survey, Reston, VA.	U.S. Geological Survey	USGS		40.4317	-112.301	0.01	70	69	68	UNKNOWN	SEDIMENTARY	UNKNOWN	UNKNOWN	CLAYSTONE																							1.5	200	30		7
D163822		USGS		Geochemistry of rock samples from the National Geochemical Database: U.S. Geological Survey, Reston, VA.	U.S. Geological Survey	USGS		40.4317	-112.301	0.01	70	69	68	UNKNOWN	SEDIMENTARY	UNKNOWN	UNKNOWN	CLAYSTONE																							2	200	30		15
D163823		USGS		Geochemistry of rock samples from the National Geochemical Database: U.S. Geological Survey, Reston, VA.	U.S. Geological Survey	USGS		40.4319	-112.301	0.01	70	69	68	UNKNOWN	SEDIMENTARY	UNKNOWN	UNKNOWN	CLAYSTONE																							1	100	30		5
D163824		USGS		Geochemistry of rock samples from the National Geochemical Database: U.S. Geological Survey, Reston, VA.	U.S. Geological Survey	USGS		40.4319	-112.301	0.01	70	69	68	UNKNOWN	SEDIMENTARY	UNKNOWN	UNKNOWN	CLAYSTONE																							3	50	50		15
D163825		USGS		Geochemistry of rock samples from the National Geochemical Database: U.S. Geological Survey, Reston, VA.	U.S. Geological Survey	USGS		40.4319	-112.301	0.01	70	69	68	UNKNOWN	SEDIMENTARY	UNKNOWN	UNKNOWN	CLAYSTONE																							1	150	15		5
D163826		USGS		Geochemistry of rock samples from the National Geochemical Database: U.S. Geological Survey, Reston, VA.	U.S. Geological Survey	USGS		40.4314	-112.304	0.01	70	69	68	UNKNOWN	SEDIMENTARY	UNKNOWN	UNKNOWN	CLAYSTONE																							2	200	30		15
D163827		USGS		Geochemistry of rock samples from the National Geochemical Database: U.S. Geological Survey, Reston, VA.	U.S. Geological Survey	USGS		40.4314	-112.304	0.01	70	69	68	UNKNOWN	SEDIMENTARY	UNKNOWN	UNKNOWN	CLAYSTONE																							2	500	20	10	10
D163828		USGS		Geochemistry of rock samples from the National Geochemical Database: U.S. Geological Survey, Reston, VA.	U.S. Geological Survey	USGS		40.4314	-112.304	0.01	70	69	68	UNKNOWN	SEDIMENTARY	UNKNOWN	UNKNOWN	CLAYSTONE																							0.5	70	15		5
D163830		USGS		Geochemistry of rock samples from the National Geochemical Database: U.S. Geological Survey, Reston, VA.	U.S. Geological Survey	USGS		42.6242	-112.799	0.01	70	69	68	UNKNOWN	SEDIMENTARY	UNKNOWN	UNKNOWN	CLAYSTONE																							3	70	50	15	20
D163831		USGS		Geochemistry of rock samples from the National Geochemical Database: U.S. Geological Survey, Reston, VA.	U.S. Geological Survey	USGS		42.6242	-112.799	0.01	70	69	68	UNKNOWN	SEDIMENTARY	UNKNOWN	UNKNOWN	CLAYSTONE																							3	100	50	10	20
D163832		USGS		Geochemistry of rock samples from the National Geochemical Database: U.S. Geological Survey, Reston, VA.	U.S. Geological Survey	USGS		42.6242	-112.799	0.01	70	69	68	UNKNOWN	SEDIMENTARY	UNKNOWN	UNKNOWN	CLAYSTONE																							2	70	30		15
D163833		USGS		Geochemistry of rock samples from the National Geochemical Database: U.S. Geological Survey, Reston, VA.	U.S. Geological Survey	USGS		42.6242	-112.799	0.01	70	69	68	UNKNOWN	SEDIMENTARY	UNKNOWN	UNKNOWN	CLAYSTONE																							5	300	70	20	20
D163834		USGS		Geochemistry of rock samples from the National Geochemical Database: U.S. Geological Survey, Reston, VA.	U.S. Geological Survey	USGS		42.6242	-112.799	0.01	70	69	68	UNKNOWN	SEDIMENTARY	UNKNOWN	UNKNOWN	CLAYSTONE																							5	500	70	15	20
D163835		USGS		Geochemistry of rock samples from the National Geochemical Database: U.S. Geological Survey, Reston, VA.	U.S. Geological Survey	USGS		42.6242	-112.799	0.01	70	69	68	UNKNOWN	SEDIMENTARY	UNKNOWN	UNKNOWN	CLAYSTONE																							5	700	70	15	20
D163836		USGS		Geochemistry of rock samples from the National Geochemical Database: U.S. Geological Survey, Reston, VA.	U.S. Geological Survey	USGS		42.6242	-112.799	0.01	70	69	68	UNKNOWN	SEDIMENTARY	UNKNOWN	UNKNOWN	CLAYSTONE																							5	1000	50	15	20
D163837		USGS		Geochemistry of rock samples from the National Geochemical Database: U.S. Geological Survey, Reston, VA.	U.S. Geological Survey	USGS		42.6242	-112.799	0.01	70	69	68	UNKNOWN	SEDIMENTARY	UNKNOWN	UNKNOWN	CLAYSTONE																							5	1000	70	20	20
D163838		USGS		Geochemistry of rock samples from the National Geochemical Database: U.S. Geological Survey, Reston, VA.	U.S. Geological Survey	USGS		42.6242	-112.798	0.01	70	69	68	UNKNOWN	SEDIMENTARY	UNKNOWN	UNKNOWN	CLAYSTONE																							7	2000	70	30	30
D163839		USGS		Geochemistry of rock samples from the National Geochemical Database: U.S. Geological Survey, Reston, VA.	U.S. Geological Survey	USGS		42.6242	-112.798	0.01	70	69	68	UNKNOWN	SEDIMENTARY	UNKNOWN	UNKNOWN	CLAYSTONE																							7	1500	70	20	30
D163840		USGS		Geochemistry of rock samples from the National Geochemical Database: U.S. Geological Survey, Reston, VA.	U.S. Geological Survey	USGS		42.6242	-112.798	0.01	70	69	68	UNKNOWN	SEDIMENTARY	UNKNOWN	UNKNOWN	CLAYSTONE																							7	1000	70	30	30
D163841		USGS		Geochemistry of rock samples from the National Geochemical Database: U.S. Geological Survey, Reston, VA.	U.S. Geological Survey	USGS		42.6242	-112.798	0.01	70	69	68	UNKNOWN	SEDIMENTARY	UNKNOWN	UNKNOWN	CLAYSTONE																							5	200	70	15	20
D163842		USGS		Geochemistry of rock samples from the National Geochemical Database: U.S. Geological Survey, Reston, VA.	U.S. Geological Survey	USGS		42.6239	-112.798	0.01	70	69	68	UNKNOWN	SEDIMENTARY	UNKNOWN	UNKNOWN	CLAYSTONE																							7	300	70	15	20
D163843		USGS		Geochemistry of rock samples from the National Geochemical Database: U.S. Geological Survey, Reston, VA.	U.S. Geological Survey	USGS		42.6239	-112.798	0.01	70	69	68	UNKNOWN	SEDIMENTARY	UNKNOWN	UNKNOWN	CLAYSTONE																							7	700	70	10	20
D163844		USGS		Geochemistry of rock samples from the National Geochemical Database: U.S. Geological Survey, Reston, VA.	U.S. Geological Survey	USGS		42.6239	-112.798	0.01	70	69	68	UNKNOWN	SEDIMENTARY	UNKNOWN	UNKNOWN	CLAYSTONE																							5	500	70	15	20
D163845		USGS		Geochemistry of rock samples from the National Geochemical Database: U.S. Geological Survey, Reston, VA.	U.S. Geological Survey	USGS		42.6239	-112.798	0.01	70	69	68	UNKNOWN	SEDIMENTARY	UNKNOWN	UNKNOWN	CLAYSTONE																							5	200	70	10	20
D163846		USGS		Geochemistry of rock samples from the National Geochemical Database: U.S. Geological Survey, Reston, VA.	U.S. Geological Survey	USGS		42.6239	-112.798	0.01	70	69	68	UNKNOWN	SEDIMENTARY	UNKNOWN	UNKNOWN	CLAYSTONE																							5	300	70	15	30
D163847		USGS		Geochemistry of rock samples from the National Geochemical Database: U.S. Geological Survey, Reston, VA.	U.S. Geological Survey	USGS		42.6236	-112.797	0.01	70	69	68	UNKNOWN	SEDIMENTARY	UNKNOWN	UNKNOWN	CLAYSTONE																							5	500	70	20	30
D163848		USGS		Geochemistry of rock samples from the National Geochemical Database: U.S. Geological Survey, Reston, VA.	U.S. Geological Survey	USGS		42.6236	-112.797	0.01	70	69	68	UNKNOWN	SEDIMENTARY	UNKNOWN	UNKNOWN	CLAYSTONE																							5	300	70	30	30
D163849		USGS		Geochemistry of rock samples from the National Geochemical Database: U.S. Geological Survey, Reston, VA.	U.S. Geological Survey	USGS		42.6233	-112.797	0.01	70	69	68	UNKNOWN	SEDIMENTARY	UNKNOWN	UNKNOWN	CLAYSTONE																							2	70	70		20
D163850		USGS		Geochemistry of rock samples from the National Geochemical Database: U.S. Geological Survey, Reston, VA.	U.S. Geological Survey	USGS		42.6233	-112.797	0.01	70	69	68	UNKNOWN	SEDIMENTARY	UNKNOWN	UNKNOWN	CLAYSTONE																							7	500	100	15	20
D163851		USGS		Geochemistry of rock samples from the National Geochemical Database: U.S. Geological Survey, Reston, VA.	U.S. Geological Survey	USGS		42.6156	-112.79	0.01	70	69	68	UNKNOWN	SEDIMENTARY	UNKNOWN	UNKNOWN	CLAYSTONE																							7	500	70	15	30
D163852		USGS		Geochemistry of rock samples from the National Geochemical Database: U.S. Geological Survey, Reston, VA.	U.S. Geological Survey	USGS		42.6153	-112.798	0.01	70	69	68	UNKNOWN	SEDIMENTARY	UNKNOWN	UNKNOWN	CLAYSTONE																							7	300	70	15	30
D163853		USGS		Geochemistry of rock samples from the National Geochemical Database: U.S. Geological Survey, Reston, VA.	U.S. Geological Survey	USGS		42.6167	-112.798	0.01	70	69	68	UNKNOWN	SEDIMENTARY	UNKNOWN	UNKNOWN	CLAYSTONE																							7	200	70	15	30
D163854		USGS		Geochemistry of rock samples from the National Geochemical Database: U.S. Geological Survey, Reston, VA.	U.S. Geological Survey	USGS		42.6181	-112.798	0.01	70	69	68	UNKNOWN	SEDIMENTARY	UNKNOWN	UNKNOWN	CLAYSTONE																							5	200	50	15	30
D163855		USGS		Geochemistry of rock samples from the National Geochemical Database: U.S. Geological Survey, Reston, VA.	U.S. Geological Survey	USGS		42.6158	-112.796	0.01	70	69	68	UNKNOWN	SEDIMENTARY	UNKNOWN	UNKNOWN	CLAYSTONE																							10	200	70	20	30
D163897		USGS		Geochemistry of rock samples from the National Geochemical Database: U.S. Geological Survey, Reston, VA.	U.S. Geological Survey	USGS		43.2667	-110.017	0.01	71	71	71	UNKNOWN	SEDIMENTARY	UNKNOWN	UNKNOWN	CLAYSTONE																							1.5	150	30		30
D163898		USGS		Geochemistry of rock samples from the National Geochemical Database: U.S. Geological Survey, Reston, VA.	U.S. Geological Survey	USGS		43.2667	-110.017	0.01	71	71	71	UNKNOWN	SEDIMENTARY	UNKNOWN	UNKNOWN	CLAYSTONE																							1	150	20		15
D163899		USGS		Geochemistry of rock samples from the National Geochemical Database: U.S. Geological Survey, Reston, VA.	U.S. Geological Survey	USGS		43.2667	-110.017	0.01	71	71	71	UNKNOWN	SEDIMENTARY	UNKNOWN	UNKNOWN	CLAYSTONE																							1.5	150	30		20
D163900		USGS		Geochemistry of rock samples from the National Geochemical Database: U.S. Geological Survey, Reston, VA.	U.S. Geological Survey	USGS		43.2667	-110.017	0.01	71	71	71	UNKNOWN	SEDIMENTARY	UNKNOWN	UNKNOWN	CLAYSTONE																							1.5	200	30		15
D163923		USGS		Geochemistry of rock samples from the National Geochemical Database: U.S. Geological Survey, Reston, VA.	U.S. Geological Survey	USGS		45.3833	-109.783	0.01	70	69	68	UNKNOWN	SEDIMENTARY	UNKNOWN	UNKNOWN	CLAYSTONE																							1.5	150	50		10
D163924		USGS		Geochemistry of rock samples from the National Geochemical Database: U.S. Geological Survey, Reston, VA.	U.S. Geological Survey	USGS		46.6722	-109.112	0.01	70	69	68	UNKNOWN	SEDIMENTARY	UNKNOWN	UNKNOWN	CLAYSTONE																							1	100	150		100		700		3
D163925		USGS		Geochemistry of rock samples from the National Geochemical Database: U.S. Geological Survey, Reston, VA.	U.S. Geological Survey	USGS		46.6736	-109.112	0.01	70	69	68	UNKNOWN	SEDIMENTARY	UNKNOWN	UNKNOWN	CLAYSTONE																							1.5	30	150		100	150	1500		3
D163928		USGS		Geochemistry of rock samples from the National Geochemical Database: U.S. Geological Survey, Reston, VA.	U.S. Geological Survey	USGS		46.6722	-109.112	0.01	70	69	68	UNKNOWN	SEDIMENTARY	UNKNOWN	UNKNOWN	CLAYSTONE																							1	100	150		100		1500		7
D163929		USGS		Geochemistry of rock samples from the National Geochemical Database: U.S. Geological Survey, Reston, VA.	U.S. Geological Survey	USGS		46.6722	-109.112	0.01	70	69	68	UNKNOWN	SEDIMENTARY	UNKNOWN	UNKNOWN	CLAYSTONE																							0.7	50	70		50
D163930		USGS		Geochemistry of rock samples from the National Geochemical Database: U.S. Geological Survey, Reston, VA.	U.S. Geological Survey	USGS		46.8417	-109.263	0.01	70	69	68	UNKNOWN	SEDIMENTARY	UNKNOWN	UNKNOWN	CLAYSTONE																							1	15	15		15
D163931		USGS		Geochemistry of rock samples from the National Geochemical Database: U.S. Geological Survey, Reston, VA.	U.S. Geological Survey	USGS		46.8417	-109.263	0.01	70	69	68	UNKNOWN	SEDIMENTARY	UNKNOWN	UNKNOWN	CLAYSTONE																							2	1000	100	10	50		700
D163932		USGS		Geochemistry of rock samples from the National Geochemical Database: U.S. Geological Survey, Reston, VA.	U.S. Geological Survey	USGS		46.8419	-109.263	0.01	70	69	68	UNKNOWN	SEDIMENTARY	UNKNOWN	UNKNOWN	CLAYSTONE																							1.5	1000	70		50		1000
D163933		USGS		Geochemistry of rock samples from the National Geochemical Database: U.S. Geological Survey, Reston, VA.	U.S. Geological Survey	USGS		46.8422	-109.263	0.01	70	69	68	UNKNOWN	SEDIMENTARY	UNKNOWN	UNKNOWN	CLAYSTONE																							1	500	30	10	70
D163934		USGS		Geochemistry of rock samples from the National Geochemical Database: U.S. Geological Survey, Reston, VA.	U.S. Geological Survey	USGS		46.8425	-109.263	0.01	70	69	68	UNKNOWN	SEDIMENTARY	UNKNOWN	UNKNOWN	CLAYSTONE																							0.7	150	30		50
D163935		USGS		Geochemistry of rock samples from the National Geochemical Database: U.S. Geological Survey, Reston, VA.	U.S. Geological Survey	USGS		46.8428	-109.262	0.01	70	69	68	UNKNOWN	SEDIMENTARY	UNKNOWN	UNKNOWN	CLAYSTONE																							3	200	50	15	30
D163936		USGS		Geochemistry of rock samples from the National Geochemical Database: U.S. Geological Survey, Reston, VA.	U.S. Geological Survey	USGS		46.7833	-108.883	0.01	70	69	68	UNKNOWN	SEDIMENTARY	UNKNOWN	UNKNOWN	CLAYSTONE																							1	200	100		70		1500
D163937		USGS		Geochemistry of rock samples from the National Geochemical Database: U.S. Geological Survey, Reston, VA.	U.S. Geological Survey	USGS		46.9125	-109.099	0.01	70	69	68	UNKNOWN	SEDIMENTARY	UNKNOWN	UNKNOWN	CLAYSTONE																							1	15	15		15
D163938		USGS		Geochemistry of rock samples from the National Geochemical Database: U.S. Geological Survey, Reston, VA.	U.S. Geological Survey	USGS		46.9128	-109.098	0.01	70	69	68	UNKNOWN	SEDIMENTARY	UNKNOWN	UNKNOWN	CLAYSTONE																							1.5	20	10		15
D163939		USGS		Geochemistry of rock samples from the National Geochemical Database: U.S. Geological Survey, Reston, VA.	U.S. Geological Survey	USGS		46.9133	-109.098	0.01	70	69	68	UNKNOWN	SEDIMENTARY	UNKNOWN	UNKNOWN	CLAYSTONE																							1.5	30	200		150		1500		2
D163940		USGS		Geochemistry of rock samples from the National Geochemical Database: U.S. Geological Survey, Reston, VA.	U.S. Geological Survey	USGS		46.9133	-109.098	0.01	70	69	68	UNKNOWN	SEDIMENTARY	UNKNOWN	UNKNOWN	CLAYSTONE																							2	70	15		15
D163941		USGS		Geochemistry of rock samples from the National Geochemical Database: U.S. Geological Survey, Reston, VA.	U.S. Geological Survey	USGS		46.9139	-109.097	0.01	70	69	68	UNKNOWN	SEDIMENTARY	UNKNOWN	UNKNOWN	CLAYSTONE																							1.5	50	100		150		1000		7
D163942		USGS		Geochemistry of rock samples from the National Geochemical Database: U.S. Geological Survey, Reston, VA.	U.S. Geological Survey	USGS		46.9144	-109.096	0.01	70	69	68	UNKNOWN	SEDIMENTARY	UNKNOWN	UNKNOWN	CLAYSTONE																							2	150	70	10	50
D163943		USGS		Geochemistry of rock samples from the National Geochemical Database: U.S. Geological Survey, Reston, VA.	U.S. Geological Survey	USGS		46.915	-109.096	0.01	70	69	68	UNKNOWN	SEDIMENTARY	UNKNOWN	UNKNOWN	CLAYSTONE																							3	70	50	10	20
D163954		USGS		Geochemistry of rock samples from the National Geochemical Database: U.S. Geological Survey, Reston, VA.	U.S. Geological Survey	USGS		44.6667	-112.781	0.01	70	69	68	UNKNOWN	SEDIMENTARY	UNKNOWN	UNKNOWN	CLAYSTONE																							5	50	20	10	20
D163956		USGS		Geochemistry of rock samples from the National Geochemical Database: U.S. Geological Survey, Reston, VA.	U.S. Geological Survey	USGS		44.1097	-112.303	0.01	70	69	68	UNKNOWN	SEDIMENTARY	UNKNOWN	UNKNOWN	CLAYSTONE																							7	2000	50	15	20
D163958		USGS		Geochemistry of rock samples from the National Geochemical Database: U.S. Geological Survey, Reston, VA.	U.S. Geological Survey	USGS		44.1069	-112.303	0.01	70	69	68	UNKNOWN	SEDIMENTARY	UNKNOWN	UNKNOWN	CLAYSTONE																							1.5	1000	30		20
D164001		USGS		Geochemistry of rock samples from the National Geochemical Database: U.S. Geological Survey, Reston, VA.	U.S. Geological Survey	USGS		40.9	-109.7	0.01	71	71	71	UNKNOWN	SEDIMENTARY	UNKNOWN	UNKNOWN	CLAYSTONE																							0.7	7	20		50
D164002		USGS		Geochemistry of rock samples from the National Geochemical Database: U.S. Geological Survey, Reston, VA.	U.S. Geological Survey	USGS		40.9	-109.7	0.01	71	71	71	UNKNOWN	SEDIMENTARY	UNKNOWN	UNKNOWN	CLAYSTONE																							1	30	70		70
D164068		USGS		Geochemistry of rock samples from the National Geochemical Database: U.S. Geological Survey, Reston, VA.	U.S. Geological Survey	USGS		45.3167	-111.567	0.01	71	71	71	UNKNOWN	SEDIMENTARY	UNKNOWN	UNKNOWN	CLAYSTONE																							1.5	50	10		50
D164123		USGS		Geochemistry of rock samples from the National Geochemical Database: U.S. Geological Survey, Reston, VA.	U.S. Geological Survey	USGS		41.5561	-112.544	0.01	70	69	68	UNKNOWN	SEDIMENTARY	UNKNOWN	UNKNOWN	CLAYSTONE																							5	500	70	10	20
D164124		USGS		Geochemistry of rock samples from the National Geochemical Database: U.S. Geological Survey, Reston, VA.	U.S. Geological Survey	USGS		41.5561	-112.544	0.01	70	69	68	UNKNOWN	SEDIMENTARY	UNKNOWN	UNKNOWN	CLAYSTONE																							5	200	70	10	15
D164125		USGS		Geochemistry of rock samples from the National Geochemical Database: U.S. Geological Survey, Reston, VA.	U.S. Geological Survey	USGS		41.8167	-111.3	0.01	68	68	68	UNKNOWN	SEDIMENTARY	UNKNOWN	UNKNOWN	CLAYSTONE																							0.7	150	150		70				5
D164128		USGS		Geochemistry of rock samples from the National Geochemical Database: U.S. Geological Survey, Reston, VA.	U.S. Geological Survey	USGS		41.0478	-111.642	0.01	68	68	68	UNKNOWN	SEDIMENTARY	UNKNOWN	UNKNOWN	CLAYSTONE																							3	300	30	10	10
D164129		USGS		Geochemistry of rock samples from the National Geochemical Database: U.S. Geological Survey, Reston, VA.	U.S. Geological Survey	USGS		41.0478	-111.642	0.01	68	68	68	UNKNOWN	SEDIMENTARY	UNKNOWN	UNKNOWN	CLAYSTONE																							1.5	50	20		7
D164138		USGS		Geochemistry of rock samples from the National Geochemical Database: U.S. Geological Survey, Reston, VA.	U.S. Geological Survey	USGS		40.8667	-112.833	0.01	70	69	68	UNKNOWN	SEDIMENTARY	UNKNOWN	UNKNOWN	CLAYSTONE																							7	200	50	15	20
D164140		USGS		Geochemistry of rock samples from the National Geochemical Database: U.S. Geological Survey, Reston, VA.	U.S. Geological Survey	USGS		40.8667	-112.833	0.01	70	69	68	UNKNOWN	SEDIMENTARY	UNKNOWN	UNKNOWN	CLAYSTONE																							5	200	70	15	20
D164142		USGS		Geochemistry of rock samples from the National Geochemical Database: U.S. Geological Survey, Reston, VA.	U.S. Geological Survey	USGS		40.8667	-112.833	0.01	70	69	68	UNKNOWN	SEDIMENTARY	UNKNOWN	UNKNOWN	CLAYSTONE																							5	500	70	15	20
D164144		USGS		Geochemistry of rock samples from the National Geochemical Database: U.S. Geological Survey, Reston, VA.	U.S. Geological Survey	USGS		40.1239	-113.847	0.01	70	69	68	UNKNOWN	SEDIMENTARY	UNKNOWN	UNKNOWN	CLAYSTONE																							3	200	50	15	20
D164145		USGS		Geochemistry of rock samples from the National Geochemical Database: U.S. Geological Survey, Reston, VA.	U.S. Geological Survey	USGS		40.125	-113.844	0.01	70	69	68	UNKNOWN	SEDIMENTARY	UNKNOWN	UNKNOWN	CLAYSTONE																							2	200	30		15
D164146		USGS		Geochemistry of rock samples from the National Geochemical Database: U.S. Geological Survey, Reston, VA.	U.S. Geological Survey	USGS		40.1267	-113.843	0.01	70	69	68	UNKNOWN	SEDIMENTARY	UNKNOWN	UNKNOWN	CLAYSTONE																							3	200	200		100		1500		7
D164148		USGS		Geochemistry of rock samples from the National Geochemical Database: U.S. Geological Survey, Reston, VA.	U.S. Geological Survey	USGS		40.1422	-113.849	0.01	70	69	68	UNKNOWN	SEDIMENTARY	UNKNOWN	UNKNOWN	CLAYSTONE																							3	150	50	15	50
D164150		USGS		Geochemistry of rock samples from the National Geochemical Database: U.S. Geological Survey, Reston, VA.	U.S. Geological Survey	USGS		40.1342	-112.598	0.01	70	69	68	UNKNOWN	SEDIMENTARY	UNKNOWN	UNKNOWN	CLAYSTONE																							3	150	30	10	20
D164151		USGS		Geochemistry of rock samples from the National Geochemical Database: U.S. Geological Survey, Reston, VA.	U.S. Geological Survey	USGS		40.1311	-112.594	0.01	70	69	68	UNKNOWN	SEDIMENTARY	UNKNOWN	UNKNOWN	CLAYSTONE																							3	100	50	10	15
D164152		USGS		Geochemistry of rock samples from the National Geochemical Database: U.S. Geological Survey, Reston, VA.	U.S. Geological Survey	USGS		40.1139	-112.568	0.01	70	69	68	UNKNOWN	SEDIMENTARY	UNKNOWN	UNKNOWN	CLAYSTONE																							5	300	50	15	15
D164154		USGS		Geochemistry of rock samples from the National Geochemical Database: U.S. Geological Survey, Reston, VA.	U.S. Geological Survey	USGS		40.1167	-112.571	0.01	70	69	68	UNKNOWN	SEDIMENTARY	UNKNOWN	UNKNOWN	CLAYSTONE																							5	1000	30	10	15
D164157		USGS		Geochemistry of rock samples from the National Geochemical Database: U.S. Geological Survey, Reston, VA.	U.S. Geological Survey	USGS		40.23	-112.162	0.01	70	69	68	UNKNOWN	SEDIMENTARY	UNKNOWN	UNKNOWN	CLAYSTONE																							5	700	50	15	20
D164159		USGS		Geochemistry of rock samples from the National Geochemical Database: U.S. Geological Survey, Reston, VA.	U.S. Geological Survey	USGS		40.2319	-112.163	0.01	70	69	68	UNKNOWN	SEDIMENTARY	UNKNOWN	UNKNOWN	CLAYSTONE																							3	200	70	15	15
D164160		USGS		Geochemistry of rock samples from the National Geochemical Database: U.S. Geological Survey, Reston, VA.	U.S. Geological Survey	USGS		40.2406	-111.972	0.01	70	69	68	UNKNOWN	SEDIMENTARY	UNKNOWN	UNKNOWN	CLAYSTONE																							7	500	50	15	30
D164162		USGS		Geochemistry of rock samples from the National Geochemical Database: U.S. Geological Survey, Reston, VA.	U.S. Geological Survey	USGS		40.2406	-111.972	0.01	70	69	68	UNKNOWN	SEDIMENTARY	UNKNOWN	UNKNOWN	CLAYSTONE																							7	150	50	15	30
D164166		USGS		Geochemistry of rock samples from the National Geochemical Database: U.S. Geological Survey, Reston, VA.	U.S. Geological Survey	USGS		40.3083	-111.629	0.01	70	69	68	UNKNOWN	SEDIMENTARY	UNKNOWN	UNKNOWN	CLAYSTONE																							7	300	70	15	20
D164167		USGS		Geochemistry of rock samples from the National Geochemical Database: U.S. Geological Survey, Reston, VA.	U.S. Geological Survey	USGS		40.3014	-111.617	0.01	70	69	68	UNKNOWN	SEDIMENTARY	UNKNOWN	UNKNOWN	CLAYSTONE																							1.5	100	150		50
D164168		USGS		Geochemistry of rock samples from the National Geochemical Database: U.S. Geological Survey, Reston, VA.	U.S. Geological Survey	USGS		40.3014	-111.617	0.01	70	69	68	UNKNOWN	SEDIMENTARY	UNKNOWN	UNKNOWN	CLAYSTONE																							1.5	150	100		50		700
D164169		USGS		Geochemistry of rock samples from the National Geochemical Database: U.S. Geological Survey, Reston, VA.	U.S. Geological Survey	USGS		40.2986	-111.615	0.01	70	69	68	UNKNOWN	SEDIMENTARY	UNKNOWN	UNKNOWN	CLAYSTONE																							2	150	150		50		1500
D164170		USGS		Geochemistry of rock samples from the National Geochemical Database: U.S. Geological Survey, Reston, VA.	U.S. Geological Survey	USGS		40.2958	-111.615	0.01	70	69	68	UNKNOWN	SEDIMENTARY	UNKNOWN	UNKNOWN	CLAYSTONE																							2	150	70		15
D164171		USGS		Geochemistry of rock samples from the National Geochemical Database: U.S. Geological Survey, Reston, VA.	U.S. Geological Survey	USGS		40.2931	-111.613	0.01	70	69	68	UNKNOWN	SEDIMENTARY	UNKNOWN	UNKNOWN	CLAYSTONE																							2	100	100		70	100	700		3
D164172		USGS		Geochemistry of rock samples from the National Geochemical Database: U.S. Geological Survey, Reston, VA.	U.S. Geological Survey	USGS		40.2903	-111.604	0.01	70	69	68	UNKNOWN	SEDIMENTARY	UNKNOWN	UNKNOWN	CLAYSTONE																							1.5	100	100		50		1000		3
D164173		USGS		Geochemistry of rock samples from the National Geochemical Database: U.S. Geological Survey, Reston, VA.	U.S. Geological Survey	USGS		40.2903	-111.604	0.01	70	69	68	UNKNOWN	SEDIMENTARY	UNKNOWN	UNKNOWN	CLAYSTONE																							2	150	100		50		700		3
D164174		USGS		Geochemistry of rock samples from the National Geochemical Database: U.S. Geological Survey, Reston, VA.	U.S. Geological Survey	USGS		40.2806	-111.604	0.01	70	69	68	UNKNOWN	SEDIMENTARY	UNKNOWN	UNKNOWN	CLAYSTONE																							5	300	70	15	30
D164175		USGS		Geochemistry of rock samples from the National Geochemical Database: U.S. Geological Survey, Reston, VA.	U.S. Geological Survey	USGS		40.2653	-111.575	0.01	70	69	68	UNKNOWN	SEDIMENTARY	UNKNOWN	UNKNOWN	CLAYSTONE																							5	500	70	15	30
D164176		USGS		Geochemistry of rock samples from the National Geochemical Database: U.S. Geological Survey, Reston, VA.	U.S. Geological Survey	USGS		40.3278	-111.618	0.01	70	69	68	UNKNOWN	SEDIMENTARY	UNKNOWN	UNKNOWN	CLAYSTONE																							3	500	50	15	50
D164177		USGS		Geochemistry of rock samples from the National Geochemical Database: U.S. Geological Survey, Reston, VA.	U.S. Geological Survey	USGS		40.3319	-111.619	0.01	70	69	68	UNKNOWN	SEDIMENTARY	UNKNOWN	UNKNOWN	CLAYSTONE																							1.5	150	70		30				3
D164178		USGS		Geochemistry of rock samples from the National Geochemical Database: U.S. Geological Survey, Reston, VA.	U.S. Geological Survey	USGS		40.3319	-111.619	0.01	70	69	68	UNKNOWN	SEDIMENTARY	UNKNOWN	UNKNOWN	CLAYSTONE																							1.5	150	50		20
D164180		USGS		Geochemistry of rock samples from the National Geochemical Database: U.S. Geological Survey, Reston, VA.	U.S. Geological Survey	USGS		40.7528	-111.112	0.01	70	69	68	UNKNOWN	SEDIMENTARY	UNKNOWN	UNKNOWN	CLAYSTONE																							1.5	500	20		10
D164184		USGS		Geochemistry of rock samples from the National Geochemical Database: U.S. Geological Survey, Reston, VA.	U.S. Geological Survey	USGS		40.7472	-111.117	0.01	70	69	68	UNKNOWN	SEDIMENTARY	UNKNOWN	UNKNOWN	CLAYSTONE																							2	100	30		7
D164185		USGS		Geochemistry of rock samples from the National Geochemical Database: U.S. Geological Survey, Reston, VA.	U.S. Geological Survey	USGS		40.7472	-111.117	0.01	70	69	68	UNKNOWN	SEDIMENTARY	UNKNOWN	UNKNOWN	CLAYSTONE																							2	150	50		10
D164186		USGS		Geochemistry of rock samples from the National Geochemical Database: U.S. Geological Survey, Reston, VA.	U.S. Geological Survey	USGS		40.7472	-111.117	0.01	70	69	68	UNKNOWN	SEDIMENTARY	UNKNOWN	UNKNOWN	CLAYSTONE																							5	150	150	50	100
D164187		USGS		Geochemistry of rock samples from the National Geochemical Database: U.S. Geological Survey, Reston, VA.	U.S. Geological Survey	USGS		40.7472	-111.117	0.01	70	69	68	UNKNOWN	SEDIMENTARY	UNKNOWN	UNKNOWN	CLAYSTONE																							2	100	70		15
D164190		USGS		Geochemistry of rock samples from the National Geochemical Database: U.S. Geological Survey, Reston, VA.	U.S. Geological Survey	USGS		40.7472	-111.117	0.01	70	69	68	UNKNOWN	SEDIMENTARY	UNKNOWN	UNKNOWN	CLAYSTONE																							3	150	70	10	15
D164192		USGS		Geochemistry of rock samples from the National Geochemical Database: U.S. Geological Survey, Reston, VA.	U.S. Geological Survey	USGS		40.7472	-111.117	0.01	70	69	68	UNKNOWN	SEDIMENTARY	UNKNOWN	UNKNOWN	CLAYSTONE																							5	150	70	15	15
D164195		USGS		Geochemistry of rock samples from the National Geochemical Database: U.S. Geological Survey, Reston, VA.	U.S. Geological Survey	USGS		40.5208	-110.979	0.01	68	68	68	UNKNOWN	SEDIMENTARY	UNKNOWN	UNKNOWN	CLAYSTONE																							7	1500	70	20	15
D164197		USGS		Geochemistry of rock samples from the National Geochemical Database: U.S. Geological Survey, Reston, VA.	U.S. Geological Survey	USGS		40.5208	-110.979	0.01	68	68	68	UNKNOWN	SEDIMENTARY	UNKNOWN	UNKNOWN	CLAYSTONE																							7	1000	70	20	15
D164199		USGS		Geochemistry of rock samples from the National Geochemical Database: U.S. Geological Survey, Reston, VA.	U.S. Geological Survey	USGS		40.5167	-110.967	0.01	68	68	68	UNKNOWN	SEDIMENTARY	UNKNOWN	UNKNOWN	CLAYSTONE																							3	700	30	15	15
D164200		USGS		Geochemistry of rock samples from the National Geochemical Database: U.S. Geological Survey, Reston, VA.	U.S. Geological Survey	USGS		40.5167	-110.967	0.01	68	68	68	UNKNOWN	SEDIMENTARY	UNKNOWN	UNKNOWN	CLAYSTONE																									50	20	15
D164202		USGS		Geochemistry of rock samples from the National Geochemical Database: U.S. Geological Survey, Reston, VA.	U.S. Geological Survey	USGS		40.5889	-109.948	0.01	68	68	68	UNKNOWN	SEDIMENTARY	UNKNOWN	UNKNOWN	CLAYSTONE																							1	70	10		7
D164204		USGS		Geochemistry of rock samples from the National Geochemical Database: U.S. Geological Survey, Reston, VA.	U.S. Geological Survey	USGS		40.9194	-109.872	0.01	68	68	68	UNKNOWN	SEDIMENTARY	UNKNOWN	UNKNOWN	CLAYSTONE																							3	20	30	10	20
D164205		USGS		Geochemistry of rock samples from the National Geochemical Database: U.S. Geological Survey, Reston, VA.	U.S. Geological Survey	USGS		40.92	-109.872	0.01	68	68	68	UNKNOWN	SEDIMENTARY	UNKNOWN	UNKNOWN	CLAYSTONE																							3	30	30	10	20
D164208		USGS		Geochemistry of rock samples from the National Geochemical Database: U.S. Geological Survey, Reston, VA.	U.S. Geological Survey	USGS		40.9208	-109.872	0.01	68	68	68	UNKNOWN	SEDIMENTARY	UNKNOWN	UNKNOWN	CLAYSTONE																							3	70	200		100		1500		3
D164216		USGS		Geochemistry of rock samples from the National Geochemical Database: U.S. Geological Survey, Reston, VA.	U.S. Geological Survey	USGS		40.7719	-108.708	0.01	68	68	68	UNKNOWN	SEDIMENTARY	UNKNOWN	UNKNOWN	CLAYSTONE																							1.5	50	50	10	50
D164217		USGS		Geochemistry of rock samples from the National Geochemical Database: U.S. Geological Survey, Reston, VA.	U.S. Geological Survey	USGS		40.7719	-108.707	0.01	68	68	68	UNKNOWN	SEDIMENTARY	UNKNOWN	UNKNOWN	CLAYSTONE																							2	50	30	10	20
D164218		USGS		Geochemistry of rock samples from the National Geochemical Database: U.S. Geological Survey, Reston, VA.	U.S. Geological Survey	USGS		40.7719	-108.707	0.01	68	68	68	UNKNOWN	SEDIMENTARY	UNKNOWN	UNKNOWN	CLAYSTONE																							3	15	30	10	500				15
D164219		USGS		Geochemistry of rock samples from the National Geochemical Database: U.S. Geological Survey, Reston, VA.	U.S. Geological Survey	USGS		40.7719	-108.707	0.01	68	68	68	UNKNOWN	SEDIMENTARY	UNKNOWN	UNKNOWN	CLAYSTONE																							3	150	50	10	100				3
D164221		USGS		Geochemistry of rock samples from the National Geochemical Database: U.S. Geological Survey, Reston, VA.	U.S. Geological Survey	USGS		40.7781	-108.707	0.01	68	68	68	UNKNOWN	SEDIMENTARY	UNKNOWN	UNKNOWN	CLAYSTONE																							1	50	30	10	30
D164222		USGS		Geochemistry of rock samples from the National Geochemical Database: U.S. Geological Survey, Reston, VA.	U.S. Geological Survey	USGS		40.7783	-108.706	0.01	68	68	68	UNKNOWN	SEDIMENTARY	UNKNOWN	UNKNOWN	CLAYSTONE																							1	50	50	10	30
D164225		USGS		Geochemistry of rock samples from the National Geochemical Database: U.S. Geological Survey, Reston, VA.	U.S. Geological Survey	USGS		40.7719	-108.707	0.01	68	68	68	UNKNOWN	SEDIMENTARY	UNKNOWN	UNKNOWN	CLAYSTONE																							1.5	150	50	15	20
D164228		USGS		Geochemistry of rock samples from the National Geochemical Database: U.S. Geological Survey, Reston, VA.	U.S. Geological Survey	USGS		44.6667	-112.781	0.01	70	69	68	UNKNOWN	SEDIMENTARY	UNKNOWN	UNKNOWN	CLAYSTONE																							2	300	50	15	20
D164735		USGS		Geochemistry of rock samples from the National Geochemical Database: U.S. Geological Survey, Reston, VA.	U.S. Geological Survey	USGS		39.4667	-113.617	0.01	55	55	55	UNKNOWN	SEDIMENTARY	UNKNOWN	UNKNOWN	CLAYSTONE																							3	200	30	10	50
D166962		USGS		Geochemistry of rock samples from the National Geochemical Database: U.S. Geological Survey, Reston, VA.	U.S. Geological Survey	USGS		38.6069	-113.944	0.01	68	68	68	UNKNOWN	SEDIMENTARY	UNKNOWN	UNKNOWN	CLAYSTONE																							3	15			10
D167604		USGS		Geochemistry of rock samples from the National Geochemical Database: U.S. Geological Survey, Reston, VA.	U.S. Geological Survey	USGS		33.9167	-106.367	0.01	3	3	3	UNKNOWN	SEDIMENTARY	UNKNOWN	UNKNOWN	CLAYSTONE																							3	100	30	15	7
D167647		USGS		Geochemistry of rock samples from the National Geochemical Database: U.S. Geological Survey, Reston, VA.	U.S. Geological Survey	USGS		37.7167	-117.7	0.01	2	2	2	UNKNOWN	SEDIMENTARY	UNKNOWN	UNKNOWN	CLAYSTONE																							2	500	30	15	15
D167734		USGS		Geochemistry of rock samples from the National Geochemical Database: U.S. Geological Survey, Reston, VA.	U.S. Geological Survey	USGS		39.675	-114.958	0.01	68	68	68	UNKNOWN	SEDIMENTARY	UNKNOWN	UNKNOWN	CLAYSTONE										0.87	0.88												5	500	50	15	20
D168022		USGS		Geochemistry of rock samples from the National Geochemical Database: U.S. Geological Survey, Reston, VA.	U.S. Geological Survey	USGS		39.8556	-114.439	0.01	68	68	68	UNKNOWN	SEDIMENTARY	UNKNOWN	UNKNOWN	CLAYSTONE										0.89	1.28												3	150	30	10	20
D168266		USGS		Geochemistry of rock samples from the National Geochemical Database: U.S. Geological Survey, Reston, VA.	U.S. Geological Survey	USGS		38	-82.75	0.01	70	70	70	UNKNOWN	SEDIMENTARY	UNKNOWN	UNKNOWN	CLAYSTONE																							3	200	70	30	70
D168267		USGS		Geochemistry of rock samples from the National Geochemical Database: U.S. Geological Survey, Reston, VA.	U.S. Geological Survey	USGS		38	-82.75	0.01	70	70	70	UNKNOWN	SEDIMENTARY	UNKNOWN	UNKNOWN	CLAYSTONE																							0.7	30	50	15	200
D168268		USGS		Geochemistry of rock samples from the National Geochemical Database: U.S. Geological Survey, Reston, VA.	U.S. Geological Survey	USGS		38	-82.75	0.01	70	70	70	UNKNOWN	SEDIMENTARY	UNKNOWN	UNKNOWN	CLAYSTONE																							7	300	50	20	30
D168269		USGS		Geochemistry of rock samples from the National Geochemical Database: U.S. Geological Survey, Reston, VA.	U.S. Geological Survey	USGS		38	-82.75	0.01	70	70	70	UNKNOWN	SEDIMENTARY	UNKNOWN	UNKNOWN	CLAYSTONE																							1	50	15	10	15
D168272		USGS		Geochemistry of rock samples from the National Geochemical Database: U.S. Geological Survey, Reston, VA.	U.S. Geological Survey	USGS		38	-82.75	0.01	70	70	70	UNKNOWN	SEDIMENTARY	UNKNOWN	UNKNOWN	CLAYSTONE																							1.5	70	20	15	15
D168275		USGS		Geochemistry of rock samples from the National Geochemical Database: U.S. Geological Survey, Reston, VA.	U.S. Geological Survey	USGS		38	-82.75	0.01	70	70	70	UNKNOWN	SEDIMENTARY	UNKNOWN	UNKNOWN	CLAYSTONE																							1.5	100	20	10	50
D168278		USGS		Geochemistry of rock samples from the National Geochemical Database: U.S. Geological Survey, Reston, VA.	U.S. Geological Survey	USGS		38	-82.75	0.01	70	70	70	UNKNOWN	SEDIMENTARY	UNKNOWN	UNKNOWN	CLAYSTONE																							1.5	100	30	15	70
D168784		USGS		Geochemistry of rock samples from the National Geochemical Database: U.S. Geological Survey, Reston, VA.	U.S. Geological Survey	USGS		38	-82.75	0.01	70	70	70	UNKNOWN	SEDIMENTARY	UNKNOWN	UNKNOWN	CLAYSTONE																							0.5	7			70
D168785		USGS		Geochemistry of rock samples from the National Geochemical Database: U.S. Geological Survey, Reston, VA.	U.S. Geological Survey	USGS		38	-82.75	0.01	70	70	70	UNKNOWN	SEDIMENTARY	UNKNOWN	UNKNOWN	CLAYSTONE																							3	150	20	15	20
D168788		USGS		Geochemistry of rock samples from the National Geochemical Database: U.S. Geological Survey, Reston, VA.	U.S. Geological Survey	USGS		38	-82.75	0.01	70	70	70	UNKNOWN	SEDIMENTARY	UNKNOWN	UNKNOWN	CLAYSTONE																							5	300	20		15
D168789		USGS		Geochemistry of rock samples from the National Geochemical Database: U.S. Geological Survey, Reston, VA.	U.S. Geological Survey	USGS		38	-84.75	0.01	70	70	70	UNKNOWN	SEDIMENTARY	UNKNOWN	UNKNOWN	CLAYSTONE																							5	1500	30	20	100
D168794		USGS		Geochemistry of rock samples from the National Geochemical Database: U.S. Geological Survey, Reston, VA.	U.S. Geological Survey	USGS		38	-84.75	0.01	70	70	70	UNKNOWN	SEDIMENTARY	UNKNOWN	UNKNOWN	CLAYSTONE																							2	1500			20
D168795		USGS		Geochemistry of rock samples from the National Geochemical Database: U.S. Geological Survey, Reston, VA.	U.S. Geological Survey	USGS		38	-84.75	0.01	70	70	70	UNKNOWN	SEDIMENTARY	UNKNOWN	UNKNOWN	CLAYSTONE																							1.5	50	50	15	70
D168799		USGS		Geochemistry of rock samples from the National Geochemical Database: U.S. Geological Survey, Reston, VA.	U.S. Geological Survey	USGS		38	-82.75	0.01	70	70	70	UNKNOWN	SEDIMENTARY	UNKNOWN	UNKNOWN	CLAYSTONE																							3	100	30		30
D169265		USGS		Geochemistry of rock samples from the National Geochemical Database: U.S. Geological Survey, Reston, VA.	U.S. Geological Survey	USGS		59.5	-151.5	0.01	18	18	18	AAS	SEDIMENTARY	UNKNOWN	UNKNOWN	CLAYSTONE
D169265		USGS		Geochemistry of rock samples from the National Geochemical Database: U.S. Geological Survey, Reston, VA.	U.S. Geological Survey	USGS		59.5	-151.5	0.01	18	18	18	COL	SEDIMENTARY	UNKNOWN	UNKNOWN	CLAYSTONE																														5
D169265		USGS		Geochemistry of rock samples from the National Geochemical Database: U.S. Geological Survey, Reston, VA.	U.S. Geological Survey	USGS		59.5	-151.5	0.01	18	18	18	DNAA	SEDIMENTARY	UNKNOWN	UNKNOWN	CLAYSTONE
D169265		USGS		Geochemistry of rock samples from the National Geochemical Database: U.S. Geological Survey, Reston, VA.	U.S. Geological Survey	USGS		59.5	-151.5	0.01	18	18	18	ES	SEDIMENTARY	UNKNOWN	UNKNOWN	CLAYSTONE																							7	1000	30	10	70
D169265		USGS		Geochemistry of rock samples from the National Geochemical Database: U.S. Geological Survey, Reston, VA.	U.S. Geological Survey	USGS		59.5	-151.5	0.01	18	18	18	ISE	SEDIMENTARY	UNKNOWN	UNKNOWN	CLAYSTONE
D169265		USGS		Geochemistry of rock samples from the National Geochemical Database: U.S. Geological Survey, Reston, VA.	U.S. Geological Survey	USGS		59.5	-151.5	0.01	18	18	18	XRF	SEDIMENTARY	UNKNOWN	UNKNOWN	CLAYSTONE
D169435		USGS		Geochemistry of rock samples from the National Geochemical Database: U.S. Geological Survey, Reston, VA.	U.S. Geological Survey	USGS		39.25	-104.125	0.01	22	22	22	UNKNOWN	SEDIMENTARY	UNKNOWN	UNKNOWN	CLAYSTONE																							0.5	50			70
D169547		USGS		Geochemistry of rock samples from the National Geochemical Database: U.S. Geological Survey, Reston, VA.	U.S. Geological Survey	USGS		38.055	-82.5931	0.01	70	70	70	UNKNOWN	SEDIMENTARY	UNKNOWN	UNKNOWN	CLAYSTONE																							3	200	30	15	50
D169550		USGS		Geochemistry of rock samples from the National Geochemical Database: U.S. Geological Survey, Reston, VA.	U.S. Geological Survey	USGS		38.0278	-82.575	0.01	70	70	70	UNKNOWN	SEDIMENTARY	UNKNOWN	UNKNOWN	CLAYSTONE																							3	200	50	30	50
D169554		USGS		Geochemistry of rock samples from the National Geochemical Database: U.S. Geological Survey, Reston, VA.	U.S. Geological Survey	USGS		38.0278	-82.5803	0.01	70	70	70	UNKNOWN	SEDIMENTARY	UNKNOWN	UNKNOWN	CLAYSTONE																							1.5	70	50	30	70
D169782		USGS		Geochemistry of rock samples from the National Geochemical Database: U.S. Geological Survey, Reston, VA.	U.S. Geological Survey	USGS		40.45	-110.85	0.01	71	71	71	UNKNOWN	SEDIMENTARY	UNKNOWN	UNKNOWN	CLAYSTONE																							1.5	70	50		20		300		1.5
D169783		USGS		Geochemistry of rock samples from the National Geochemical Database: U.S. Geological Survey, Reston, VA.	U.S. Geological Survey	USGS		40.45	-110.85	0.01	71	71	71	UNKNOWN	SEDIMENTARY	UNKNOWN	UNKNOWN	CLAYSTONE																							0.7	70	15		10		300		5
D169784		USGS		Geochemistry of rock samples from the National Geochemical Database: U.S. Geological Survey, Reston, VA.	U.S. Geological Survey	USGS		40.45	-110.85	0.01	71	71	71	UNKNOWN	SEDIMENTARY	UNKNOWN	UNKNOWN	CLAYSTONE																							1.5	70	30		150				1
D169785		USGS		Geochemistry of rock samples from the National Geochemical Database: U.S. Geological Survey, Reston, VA.	U.S. Geological Survey	USGS		40.2	-111.4	0.01	71	71	71	UNKNOWN	SEDIMENTARY	UNKNOWN	UNKNOWN	CLAYSTONE																							1	70	30		20				1
D169786		USGS		Geochemistry of rock samples from the National Geochemical Database: U.S. Geological Survey, Reston, VA.	U.S. Geological Survey	USGS		40.2	-111.4	0.01	71	71	71	UNKNOWN	SEDIMENTARY	UNKNOWN	UNKNOWN	CLAYSTONE																							0.7	50	20		15
D169787		USGS		Geochemistry of rock samples from the National Geochemical Database: U.S. Geological Survey, Reston, VA.	U.S. Geological Survey	USGS		40.8167	-111.75	0.01	71	71	71	UNKNOWN	SEDIMENTARY	UNKNOWN	UNKNOWN	CLAYSTONE																							0.7	70	15		15
D169789		USGS		Geochemistry of rock samples from the National Geochemical Database: U.S. Geological Survey, Reston, VA.	U.S. Geological Survey	USGS		42.8333	-108.85	0.01	71	71	71	UNKNOWN	SEDIMENTARY	UNKNOWN	UNKNOWN	CLAYSTONE																							3	150	20	7	20
D169790		USGS		Geochemistry of rock samples from the National Geochemical Database: U.S. Geological Survey, Reston, VA.	U.S. Geological Survey	USGS		42.8333	-108.85	0.01	71	71	71	UNKNOWN	SEDIMENTARY	UNKNOWN	UNKNOWN	CLAYSTONE																							2	150	20	5	15
D169791		USGS		Geochemistry of rock samples from the National Geochemical Database: U.S. Geological Survey, Reston, VA.	U.S. Geological Survey	USGS		42.8333	-108.85	0.01	71	71	71	UNKNOWN	SEDIMENTARY	UNKNOWN	UNKNOWN	CLAYSTONE																							1.5	70	15		10
D169794		USGS		Geochemistry of rock samples from the National Geochemical Database: U.S. Geological Survey, Reston, VA.	U.S. Geological Survey	USGS		45.8167	-111.8	0.01	71	71	71	UNKNOWN	SEDIMENTARY	UNKNOWN	UNKNOWN	CLAYSTONE																							1.5	200	30		30	100	1000		3
D169796		USGS		Geochemistry of rock samples from the National Geochemical Database: U.S. Geological Survey, Reston, VA.	U.S. Geological Survey	USGS		45.0333	-112.683	0.01	71	71	71	UNKNOWN	SEDIMENTARY	UNKNOWN	UNKNOWN	CLAYSTONE																							1.5	30	50		100				5
D169803		USGS		Geochemistry of rock samples from the National Geochemical Database: U.S. Geological Survey, Reston, VA.	U.S. Geological Survey	USGS		44.7667	-112.3	0.01	71	71	71	UNKNOWN	SEDIMENTARY	UNKNOWN	UNKNOWN	CLAYSTONE																						10	1.5	50	70		150	100	300		15
D169808		USGS		Geochemistry of rock samples from the National Geochemical Database: U.S. Geological Survey, Reston, VA.	U.S. Geological Survey	USGS		44.6667	-113.183	0.01	71	71	71	UNKNOWN	SEDIMENTARY	UNKNOWN	UNKNOWN	CLAYSTONE																						5	0.5	30	150		150	70	500		15
D169811		USGS		Geochemistry of rock samples from the National Geochemical Database: U.S. Geological Survey, Reston, VA.	U.S. Geological Survey	USGS		44.55	-111.7	0.01	71	71	71	UNKNOWN	SEDIMENTARY	UNKNOWN	UNKNOWN	CLAYSTONE																							3	50	70		150	100	700		15
D170614		USGS		Geochemistry of rock samples from the National Geochemical Database: U.S. Geological Survey, Reston, VA.	U.S. Geological Survey	USGS		41.425	-109.103	0.01	3	3	3	UNKNOWN	SEDIMENTARY	UNKNOWN	UNKNOWN	CLAYSTONE		35.9	0.123	28.1							0.228	0.22	4.13	0.437									0.7	1.5			15
D170615		USGS		Geochemistry of rock samples from the National Geochemical Database: U.S. Geological Survey, Reston, VA.	U.S. Geological Survey	USGS		41.425	-109.103	0.01	3	3	3	UNKNOWN	SEDIMENTARY	UNKNOWN	UNKNOWN	CLAYSTONE		58.5	0.435	20							0.157	0.22	3.4	0.45
D170695		USGS		Geochemistry of rock samples from the National Geochemical Database: U.S. Geological Survey, Reston, VA.	U.S. Geological Survey	USGS		37.25	-112.25	0.01	65	65	65	UNKNOWN	SEDIMENTARY	UNKNOWN	UNKNOWN	CLAYSTONE		49.1	0.528	14.9						2.63	14.3		2.39	0.134									2	150	30		15
D170696		USGS		Geochemistry of rock samples from the National Geochemical Database: U.S. Geological Survey, Reston, VA.	U.S. Geological Survey	USGS		37.25	-112.25	0.01	65	65	65	UNKNOWN	SEDIMENTARY	UNKNOWN	UNKNOWN	CLAYSTONE		72.7	0.477	11.8						2.55	1.98		1.67	0.187									1.5	70	30		15
D170699		USGS		Geochemistry of rock samples from the National Geochemical Database: U.S. Geological Survey, Reston, VA.	U.S. Geological Survey	USGS		37.25	-112.25	0.01	65	65	65	UNKNOWN	SEDIMENTARY	UNKNOWN	UNKNOWN	CLAYSTONE		60.6	0.724	18.8						1.13	0.318		1.48										0.7	70	20		30
D171616		USGS		Geochemistry of rock samples from the National Geochemical Database: U.S. Geological Survey, Reston, VA.	U.S. Geological Survey	USGS		32.4167	-103.75	0.01	71	71	71	MISC	SEDIMENTARY	UNKNOWN	UNKNOWN	CLAYSTONE																5.91
D171616		USGS		Geochemistry of rock samples from the National Geochemical Database: U.S. Geological Survey, Reston, VA.	U.S. Geological Survey	USGS		32.4167	-103.75	0.01	71	71	71	UNKNOWN	SEDIMENTARY	UNKNOWN	UNKNOWN	CLAYSTONE		14.6		3.1						7.21	26.3	1.64	0.7
D171617		USGS		Geochemistry of rock samples from the National Geochemical Database: U.S. Geological Survey, Reston, VA.	U.S. Geological Survey	USGS		32.4167	-103.75	0.01	71	71	71	MISC	SEDIMENTARY	UNKNOWN	UNKNOWN	CLAYSTONE																4.36
D171617		USGS		Geochemistry of rock samples from the National Geochemical Database: U.S. Geological Survey, Reston, VA.	U.S. Geological Survey	USGS		32.4167	-103.75	0.01	71	71	71	UNKNOWN	SEDIMENTARY	UNKNOWN	UNKNOWN	CLAYSTONE		14.5		1.98						5.41	28	1.12	0.59
D171618		USGS		Geochemistry of rock samples from the National Geochemical Database: U.S. Geological Survey, Reston, VA.	U.S. Geological Survey	USGS		32.4167	-103.75	0.01	71	71	71	MISC	SEDIMENTARY	UNKNOWN	UNKNOWN	CLAYSTONE																22.3
D171618		USGS		Geochemistry of rock samples from the National Geochemical Database: U.S. Geological Survey, Reston, VA.	U.S. Geological Survey	USGS		32.4167	-103.75	0.01	71	71	71	UNKNOWN	SEDIMENTARY	UNKNOWN	UNKNOWN	CLAYSTONE		16.7		3.24						22.2	10.9	2.69	1.6
D173389		USGS		Geochemistry of rock samples from the National Geochemical Database: U.S. Geological Survey, Reston, VA.	U.S. Geological Survey	USGS		41.2858	-107.426	0.01	8	9.5	11	AAS	SEDIMENTARY	UNKNOWN	UNKNOWN	CLAYSTONE
D173389		USGS		Geochemistry of rock samples from the National Geochemical Database: U.S. Geological Survey, Reston, VA.	U.S. Geological Survey	USGS		41.2858	-107.426	0.01	8	9.5	11	UNKNOWN	SEDIMENTARY	UNKNOWN	UNKNOWN	CLAYSTONE																							0.7	20	3		15
D173795		USGS		Geochemistry of rock samples from the National Geochemical Database: U.S. Geological Survey, Reston, VA.	U.S. Geological Survey	USGS		45.5	-106.125	0.01	22	22	22	UNKNOWN	SEDIMENTARY	UNKNOWN	UNKNOWN	CLAYSTONE		55	0.49	14						3.85	4.2	0.86											1.5	200	20	10
D173825		USGS		Geochemistry of rock samples from the National Geochemical Database: U.S. Geological Survey, Reston, VA.	U.S. Geological Survey	USGS		43.625	-110.5	0.01	11	11	11	UNKNOWN	SEDIMENTARY	UNKNOWN	UNKNOWN	CLAYSTONE		52.1	0.865	22.8							1.51	0.15	0.32										2	15			10
D177598		USGS		Geochemistry of rock samples from the National Geochemical Database: U.S. Geological Survey, Reston, VA.	U.S. Geological Survey	USGS		46.7667	-113.083	0.01	11	13	15	UNKNOWN	SEDIMENTARY	UNKNOWN	UNKNOWN	CLAYSTONE																							7	500	10	10	100
D177606		USGS		Geochemistry of rock samples from the National Geochemical Database: U.S. Geological Survey, Reston, VA.	U.S. Geological Survey	USGS		46.7833	-113.1	0.01	11	13	15	UNKNOWN	SEDIMENTARY	UNKNOWN	UNKNOWN	CLAYSTONE																							7	150	150	10	70
D177607		USGS		Geochemistry of rock samples from the National Geochemical Database: U.S. Geological Survey, Reston, VA.	U.S. Geological Survey	USGS		46.7833	-113.117	0.01	11	13	15	UNKNOWN	SEDIMENTARY	UNKNOWN	UNKNOWN	CLAYSTONE																							10	1000	15	15	100
D177609		USGS		Geochemistry of rock samples from the National Geochemical Database: U.S. Geological Survey, Reston, VA.	U.S. Geological Survey	USGS		46.7667	-113.083	0.01	11	13	15	UNKNOWN	SEDIMENTARY	UNKNOWN	UNKNOWN	CLAYSTONE																							7	500	7	10	100
D177610		USGS		Geochemistry of rock samples from the National Geochemical Database: U.S. Geological Survey, Reston, VA.	U.S. Geological Survey	USGS		46.7833	-113.05	0.01	11	13	15	UNKNOWN	SEDIMENTARY	UNKNOWN	UNKNOWN	CLAYSTONE																							7	700	10	10	100
D178698		USGS		Geochemistry of rock samples from the National Geochemical Database: U.S. Geological Survey, Reston, VA.	U.S. Geological Survey	USGS		37.1097	-114.725	0.01	68	68	68	UNKNOWN	SEDIMENTARY	UNKNOWN	UNKNOWN	CLAYSTONE																						32	2.2	35	80	11	26		59		0.19
D178699		USGS		Geochemistry of rock samples from the National Geochemical Database: U.S. Geological Survey, Reston, VA.	U.S. Geological Survey	USGS		37.1097	-114.725	0.01	68	68	68	UNKNOWN	SEDIMENTARY	UNKNOWN	UNKNOWN	CLAYSTONE																						35	4.8	210	58	11	24		100		0.23
D178700		USGS		Geochemistry of rock samples from the National Geochemical Database: U.S. Geological Survey, Reston, VA.	U.S. Geological Survey	USGS		37.1097	-114.725	0.01	68	68	68	UNKNOWN	SEDIMENTARY	UNKNOWN	UNKNOWN	CLAYSTONE																							2.5	280	57	9.4	27		81		0.22
D178702		USGS		Geochemistry of rock samples from the National Geochemical Database: U.S. Geological Survey, Reston, VA.	U.S. Geological Survey	USGS		37.1097	-114.725	0.01	68	68	68	UNKNOWN	SEDIMENTARY	UNKNOWN	UNKNOWN	CLAYSTONE																							4.5	74	79	7.9	29		150		0.18
D178703		USGS		Geochemistry of rock samples from the National Geochemical Database: U.S. Geological Survey, Reston, VA.	U.S. Geological Survey	USGS		37.1097	-114.725	0.01	68	68	68	UNKNOWN	SEDIMENTARY	UNKNOWN	UNKNOWN	CLAYSTONE																							6	130	82	8.7	33		150		0.2
D178705		USGS		Geochemistry of rock samples from the National Geochemical Database: U.S. Geological Survey, Reston, VA.	U.S. Geological Survey	USGS		37.1097	-114.725	0.01	68	68	68	UNKNOWN	SEDIMENTARY	UNKNOWN	UNKNOWN	CLAYSTONE																							2.3	80	89	11	30		110		0.28
D178734		USGS		Geochemistry of rock samples from the National Geochemical Database: U.S. Geological Survey, Reston, VA.	U.S. Geological Survey	USGS		38.7358	-114.975	0.01	68	68	68	UNKNOWN	SEDIMENTARY	UNKNOWN	UNKNOWN	CLAYSTONE																						23	1.9	250	42	10	19		67		0.13
D178940		USGS		Geochemistry of rock samples from the National Geochemical Database: U.S. Geological Survey, Reston, VA.	U.S. Geological Survey	USGS		47.6756	-106.169	0.01	22	22	22	UNKNOWN	SEDIMENTARY	UNKNOWN	UNKNOWN	CLAYSTONE																							0.5	50			15
D178941		USGS		Geochemistry of rock samples from the National Geochemical Database: U.S. Geological Survey, Reston, VA.	U.S. Geological Survey	USGS		47.5506	-106.201	0.01	22	22	22	UNKNOWN	SEDIMENTARY	UNKNOWN	UNKNOWN	CLAYSTONE																							3	100	15		30
D178942		USGS		Geochemistry of rock samples from the National Geochemical Database: U.S. Geological Survey, Reston, VA.	U.S. Geological Survey	USGS		47.5506	-106.201	0.01	22	22	22	UNKNOWN	SEDIMENTARY	UNKNOWN	UNKNOWN	CLAYSTONE																							3	150	30	10	30
D179947		USGS		Geochemistry of rock samples from the National Geochemical Database: U.S. Geological Survey, Reston, VA.	U.S. Geological Survey	USGS		44.3533	-106.693	0.01	18	18	18	UNKNOWN	SEDIMENTARY	UNKNOWN	UNKNOWN	CLAYSTONE																							5	150	30	15	70
D182908		USGS		Geochemistry of rock samples from the National Geochemical Database: U.S. Geological Survey, Reston, VA.	U.S. Geological Survey	USGS		43.4392	-111.454	0.01	71	71	71	UNKNOWN	SEDIMENTARY	UNKNOWN	UNKNOWN	CLAYSTONE																							2	70		7	70
D182925		USGS		Geochemistry of rock samples from the National Geochemical Database: U.S. Geological Survey, Reston, VA.	U.S. Geological Survey	USGS		43.4392	-111.454	0.01	71	71	71	UNKNOWN	SEDIMENTARY	UNKNOWN	UNKNOWN	CLAYSTONE																						10	2	70			300
D182928		USGS		Geochemistry of rock samples from the National Geochemical Database: U.S. Geological Survey, Reston, VA.	U.S. Geological Survey	USGS		43.4392	-111.454	0.01	71	71	71	UNKNOWN	SEDIMENTARY	UNKNOWN	UNKNOWN	CLAYSTONE																						7	1.5	150			150
D182930		USGS		Geochemistry of rock samples from the National Geochemical Database: U.S. Geological Survey, Reston, VA.	U.S. Geological Survey	USGS		43.4392	-111.454	0.01	71	71	71	UNKNOWN	SEDIMENTARY	UNKNOWN	UNKNOWN	CLAYSTONE																							2	150		5	200
D182933		USGS		Geochemistry of rock samples from the National Geochemical Database: U.S. Geological Survey, Reston, VA.	U.S. Geological Survey	USGS		43.4392	-111.454	0.01	71	71	71	UNKNOWN	SEDIMENTARY	UNKNOWN	UNKNOWN	CLAYSTONE																							1.5	150		5	100
D183179		USGS		Geochemistry of rock samples from the National Geochemical Database: U.S. Geological Survey, Reston, VA.	U.S. Geological Survey	USGS		37.75	-110.5	0.01	56	56	56	UNKNOWN	SEDIMENTARY	UNKNOWN	UNKNOWN	CLAYSTONE																							2	100	10	5	15				3
D183186		USGS		Geochemistry of rock samples from the National Geochemical Database: U.S. Geological Survey, Reston, VA.	U.S. Geological Survey	USGS		37.75	-110.5	0.01	56	56	56	UNKNOWN	SEDIMENTARY	UNKNOWN	UNKNOWN	CLAYSTONE																							3	150	10		15
D183193		USGS		Geochemistry of rock samples from the National Geochemical Database: U.S. Geological Survey, Reston, VA.	U.S. Geological Survey	USGS		37.75	-110.5	0.01	56	56	56	UNKNOWN	SEDIMENTARY	UNKNOWN	UNKNOWN	CLAYSTONE																							2	100	15	7	20
D183204		USGS		Geochemistry of rock samples from the National Geochemical Database: U.S. Geological Survey, Reston, VA.	U.S. Geological Survey	USGS		37.75	-110.5	0.01	56	56	56	UNKNOWN	SEDIMENTARY	UNKNOWN	UNKNOWN	CLAYSTONE																							3	150	30	15	30
D183262		USGS		Geochemistry of rock samples from the National Geochemical Database: U.S. Geological Survey, Reston, VA.	U.S. Geological Survey	USGS		37.75	-109	0.01	56	56	56	UNKNOWN	SEDIMENTARY	UNKNOWN	UNKNOWN	CLAYSTONE																							3	100	20	20	15
D183686		USGS		Geochemistry of rock samples from the National Geochemical Database: U.S. Geological Survey, Reston, VA.	U.S. Geological Survey	USGS		40.0167	-114.917	0.01	68	68	68	UNKNOWN	SEDIMENTARY	UNKNOWN	UNKNOWN	CLAYSTONE																							5	300	50	10	15
D184449		USGS		Geochemistry of rock samples from the National Geochemical Database: U.S. Geological Survey, Reston, VA.	U.S. Geological Survey	USGS		47	-112.75	0.01	15	15	15	UNKNOWN	SEDIMENTARY	UNKNOWN	UNKNOWN	CLAYSTONE																							3	200	15	5	15			3000
D184463		USGS		Geochemistry of rock samples from the National Geochemical Database: U.S. Geological Survey, Reston, VA.	U.S. Geological Survey	USGS		47	-112.75	0.01	15	15	15	UNKNOWN	SEDIMENTARY	UNKNOWN	UNKNOWN	CLAYSTONE																							3	500			30
D184464		USGS		Geochemistry of rock samples from the National Geochemical Database: U.S. Geological Survey, Reston, VA.	U.S. Geological Survey	USGS		47	-112.75	0.01	15	15	15	UNKNOWN	SEDIMENTARY	UNKNOWN	UNKNOWN	CLAYSTONE																							1	700	10	5	7
D184471		USGS		Geochemistry of rock samples from the National Geochemical Database: U.S. Geological Survey, Reston, VA.	U.S. Geological Survey	USGS		47.0333	-112.8	0.01	15	15	15	UNKNOWN	SEDIMENTARY	UNKNOWN	UNKNOWN	CLAYSTONE																							10	3000	7	5	30
D184472		USGS		Geochemistry of rock samples from the National Geochemical Database: U.S. Geological Survey, Reston, VA.	U.S. Geological Survey	USGS		47.0333	-112.8	0.01	15	15	15	UNKNOWN	SEDIMENTARY	UNKNOWN	UNKNOWN	CLAYSTONE																							5	70		5	100
D184473		USGS		Geochemistry of rock samples from the National Geochemical Database: U.S. Geological Survey, Reston, VA.	U.S. Geological Survey	USGS		47.0333	-112.8	0.01	15	15	15	UNKNOWN	SEDIMENTARY	UNKNOWN	UNKNOWN	CLAYSTONE																							5	1500	7	15	150
D184474		USGS		Geochemistry of rock samples from the National Geochemical Database: U.S. Geological Survey, Reston, VA.	U.S. Geological Survey	USGS		47.0333	-112.8	0.01	15	15	15	UNKNOWN	SEDIMENTARY	UNKNOWN	UNKNOWN	CLAYSTONE																							7	30			70
D184476		USGS		Geochemistry of rock samples from the National Geochemical Database: U.S. Geological Survey, Reston, VA.	U.S. Geological Survey	USGS		47.0333	-112.8	0.01	15	15	15	UNKNOWN	SEDIMENTARY	UNKNOWN	UNKNOWN	CLAYSTONE																							3	50			30
D184477		USGS		Geochemistry of rock samples from the National Geochemical Database: U.S. Geological Survey, Reston, VA.	U.S. Geological Survey	USGS		47.0333	-112.8	0.01	15	15	15	UNKNOWN	SEDIMENTARY	UNKNOWN	UNKNOWN	CLAYSTONE																							3	100			30
D184478		USGS		Geochemistry of rock samples from the National Geochemical Database: U.S. Geological Survey, Reston, VA.	U.S. Geological Survey	USGS		47.0333	-112.8	0.01	15	15	15	UNKNOWN	SEDIMENTARY	UNKNOWN	UNKNOWN	CLAYSTONE																							3	50			20
D184479		USGS		Geochemistry of rock samples from the National Geochemical Database: U.S. Geological Survey, Reston, VA.	U.S. Geological Survey	USGS		47.0333	-112.8	0.01	15	15	15	UNKNOWN	SEDIMENTARY	UNKNOWN	UNKNOWN	CLAYSTONE																							1.5	3000			10
D184481		USGS		Geochemistry of rock samples from the National Geochemical Database: U.S. Geological Survey, Reston, VA.	U.S. Geological Survey	USGS		47.0333	-112.8	0.01	15	15	15	UNKNOWN	SEDIMENTARY	UNKNOWN	UNKNOWN	CLAYSTONE																							5	70	5		30
D184485		USGS		Geochemistry of rock samples from the National Geochemical Database: U.S. Geological Survey, Reston, VA.	U.S. Geological Survey	USGS		47.0333	-112.8	0.01	15	15	15	UNKNOWN	SEDIMENTARY	UNKNOWN	UNKNOWN	CLAYSTONE																							3	300	5	5	20
D184657		USGS		Geochemistry of rock samples from the National Geochemical Database: U.S. Geological Survey, Reston, VA.	U.S. Geological Survey	USGS		44.1917	-105.458	0.01	18	18	18	UNKNOWN	SEDIMENTARY	UNKNOWN	UNKNOWN	CLAYSTONE																							1.5	7	15		30
D186897		USGS		Geochemistry of rock samples from the National Geochemical Database: U.S. Geological Survey, Reston, VA.	U.S. Geological Survey	USGS		36.2883	-106.664	0.01	56	56	56	UNKNOWN	SEDIMENTARY	UNKNOWN	UNKNOWN	CLAYSTONE
D187357		USGS		Geochemistry of rock samples from the National Geochemical Database: U.S. Geological Survey, Reston, VA.	U.S. Geological Survey	USGS		36.1333	-114.933	0.01	11	11	11	UNKNOWN	SEDIMENTARY	UNKNOWN	UNKNOWN	CLAYSTONE																						5	0.5	30			3				0.7
D187364		USGS		Geochemistry of rock samples from the National Geochemical Database: U.S. Geological Survey, Reston, VA.	U.S. Geological Survey	USGS		36.1333	-114.933	0.01	11	11	11	UNKNOWN	SEDIMENTARY	UNKNOWN	UNKNOWN	CLAYSTONE																							0.5	100			1.5
D187365		USGS		Geochemistry of rock samples from the National Geochemical Database: U.S. Geological Survey, Reston, VA.	U.S. Geological Survey	USGS		36.1333	-114.933	0.01	11	11	11	UNKNOWN	SEDIMENTARY	UNKNOWN	UNKNOWN	CLAYSTONE																						0.7	0.15	15			3
D187366		USGS		Geochemistry of rock samples from the National Geochemical Database: U.S. Geological Survey, Reston, VA.	U.S. Geological Survey	USGS		36.1333	-114.933	0.01	11	11	11	UNKNOWN	SEDIMENTARY	UNKNOWN	UNKNOWN	CLAYSTONE																						0.7	0.05	15			1.5
D187367		USGS		Geochemistry of rock samples from the National Geochemical Database: U.S. Geological Survey, Reston, VA.	U.S. Geological Survey	USGS		36.1333	-114.933	0.01	11	11	11	UNKNOWN	SEDIMENTARY	UNKNOWN	UNKNOWN	CLAYSTONE																							0.7	100	5		20		700
D187373		USGS		Geochemistry of rock samples from the National Geochemical Database: U.S. Geological Survey, Reston, VA.	U.S. Geological Survey	USGS		36.1333	-114.933	0.01	11	11	11	UNKNOWN	SEDIMENTARY	UNKNOWN	UNKNOWN	CLAYSTONE																							1.5	150	7		10				0.7
D187375		USGS		Geochemistry of rock samples from the National Geochemical Database: U.S. Geological Survey, Reston, VA.	U.S. Geological Survey	USGS		36.1333	-114.933	0.01	11	11	11	UNKNOWN	SEDIMENTARY	UNKNOWN	UNKNOWN	CLAYSTONE																						0.7	0.07	30			1.5
D187379		USGS		Geochemistry of rock samples from the National Geochemical Database: U.S. Geological Survey, Reston, VA.	U.S. Geological Survey	USGS		36.1333	-114.933	0.01	11	11	11	UNKNOWN	SEDIMENTARY	UNKNOWN	UNKNOWN	CLAYSTONE																						10	1.5	200	15	7	15				1.5
D187381		USGS		Geochemistry of rock samples from the National Geochemical Database: U.S. Geological Survey, Reston, VA.	U.S. Geological Survey	USGS		36.1333	-114.933	0.01	11	11	11	UNKNOWN	SEDIMENTARY	UNKNOWN	UNKNOWN	CLAYSTONE																						1.5	0.15	30			5
D187382		USGS		Geochemistry of rock samples from the National Geochemical Database: U.S. Geological Survey, Reston, VA.	U.S. Geological Survey	USGS		36.1333	-114.933	0.01	11	11	11	UNKNOWN	SEDIMENTARY	UNKNOWN	UNKNOWN	CLAYSTONE																						0.7	0.03	15			1.5
D187385		USGS		Geochemistry of rock samples from the National Geochemical Database: U.S. Geological Survey, Reston, VA.	U.S. Geological Survey	USGS		36.1333	-114.933	0.01	11	11	11	UNKNOWN	SEDIMENTARY	UNKNOWN	UNKNOWN	CLAYSTONE																						0.5	0.05	30			5
D187388		USGS		Geochemistry of rock samples from the National Geochemical Database: U.S. Geological Survey, Reston, VA.	U.S. Geological Survey	USGS		36.1333	-114.933	0.01	11	11	11	UNKNOWN	SEDIMENTARY	UNKNOWN	UNKNOWN	CLAYSTONE																						0.7	0.05	15			1.5
D187389		USGS		Geochemistry of rock samples from the National Geochemical Database: U.S. Geological Survey, Reston, VA.	U.S. Geological Survey	USGS		36.1333	-114.933	0.01	11	11	11	UNKNOWN	SEDIMENTARY	UNKNOWN	UNKNOWN	CLAYSTONE																						10	1	150	15		10
D187392		USGS		Geochemistry of rock samples from the National Geochemical Database: U.S. Geological Survey, Reston, VA.	U.S. Geological Survey	USGS		36.1333	-114.933	0.01	11	11	11	UNKNOWN	SEDIMENTARY	UNKNOWN	UNKNOWN	CLAYSTONE																						1.5	0.07	30			3
D187400		USGS		Geochemistry of rock samples from the National Geochemical Database: U.S. Geological Survey, Reston, VA.	U.S. Geological Survey	USGS		36.1333	-114.933	0.01	11	11	11	UNKNOWN	SEDIMENTARY	UNKNOWN	UNKNOWN	CLAYSTONE																						2	0.3	30			2
D187406		USGS		Geochemistry of rock samples from the National Geochemical Database: U.S. Geological Survey, Reston, VA.	U.S. Geological Survey	USGS		36.1333	-114.933	0.01	11	11	11	UNKNOWN	SEDIMENTARY	UNKNOWN	UNKNOWN	CLAYSTONE																							1.5	150	10	5	15				1
D187407		USGS		Geochemistry of rock samples from the National Geochemical Database: U.S. Geological Survey, Reston, VA.	U.S. Geological Survey	USGS		36.1333	-114.933	0.01	11	11	11	UNKNOWN	SEDIMENTARY	UNKNOWN	UNKNOWN	CLAYSTONE																							3	150	10	7	20				1
D187408		USGS		Geochemistry of rock samples from the National Geochemical Database: U.S. Geological Survey, Reston, VA.	U.S. Geological Survey	USGS		36.1333	-114.933	0.01	11	11	11	UNKNOWN	SEDIMENTARY	UNKNOWN	UNKNOWN	CLAYSTONE																						0.7	0.1	15			1.5
D187439		USGS		Geochemistry of rock samples from the National Geochemical Database: U.S. Geological Survey, Reston, VA.	U.S. Geological Survey	USGS		34.9833	-118.017	0.01	3	3	3	UNKNOWN	SEDIMENTARY	UNKNOWN	UNKNOWN	CLAYSTONE																							3	100			5
D187444		USGS		Geochemistry of rock samples from the National Geochemical Database: U.S. Geological Survey, Reston, VA.	U.S. Geological Survey	USGS		34.9833	-118.017	0.01	3	3	3	UNKNOWN	SEDIMENTARY	UNKNOWN	UNKNOWN	CLAYSTONE																							3	50			7
D187448		USGS		Geochemistry of rock samples from the National Geochemical Database: U.S. Geological Survey, Reston, VA.	U.S. Geological Survey	USGS		34.9833	-118.017	0.01	3	3	3	UNKNOWN	SEDIMENTARY	UNKNOWN	UNKNOWN	CLAYSTONE																							2	50			10
D187457		USGS		Geochemistry of rock samples from the National Geochemical Database: U.S. Geological Survey, Reston, VA.	U.S. Geological Survey	USGS		34.9833	-118.017	0.01	3	3	3	UNKNOWN	SEDIMENTARY	UNKNOWN	UNKNOWN	CLAYSTONE																							3	100			15
D187458		USGS		Geochemistry of rock samples from the National Geochemical Database: U.S. Geological Survey, Reston, VA.	U.S. Geological Survey	USGS		34.9833	-118.017	0.01	3	3	3	UNKNOWN	SEDIMENTARY	UNKNOWN	UNKNOWN	CLAYSTONE																							2	70			10
D187481		USGS		Geochemistry of rock samples from the National Geochemical Database: U.S. Geological Survey, Reston, VA.	U.S. Geological Survey	USGS		35.05	-117.017	0.01	3	3	3	UNKNOWN	SEDIMENTARY	UNKNOWN	UNKNOWN	CLAYSTONE																							7	500	15	7	50
D187482		USGS		Geochemistry of rock samples from the National Geochemical Database: U.S. Geological Survey, Reston, VA.	U.S. Geological Survey	USGS		35.05	-117.017	0.01	3	3	3	UNKNOWN	SEDIMENTARY	UNKNOWN	UNKNOWN	CLAYSTONE																							7	300	15	10	70
D187483		USGS		Geochemistry of rock samples from the National Geochemical Database: U.S. Geological Survey, Reston, VA.	U.S. Geological Survey	USGS		35.05	-117.017	0.01	3	3	3	UNKNOWN	SEDIMENTARY	UNKNOWN	UNKNOWN	CLAYSTONE																							5	300	15	10	70
D187488		USGS		Geochemistry of rock samples from the National Geochemical Database: U.S. Geological Survey, Reston, VA.	U.S. Geological Survey	USGS		35.05	-117.017	0.01	3	3	3	UNKNOWN	SEDIMENTARY	UNKNOWN	UNKNOWN	CLAYSTONE																							7	500	10	7	20
D187489		USGS		Geochemistry of rock samples from the National Geochemical Database: U.S. Geological Survey, Reston, VA.	U.S. Geological Survey	USGS		35.05	-117.017	0.01	3	3	3	UNKNOWN	SEDIMENTARY	UNKNOWN	UNKNOWN	CLAYSTONE		51	0.49	12.3					0.18	8.87	2	3.53	4.15	0.08									7	500	15	7	20
D187492		USGS		Geochemistry of rock samples from the National Geochemical Database: U.S. Geological Survey, Reston, VA.	U.S. Geological Survey	USGS		35.05	-117.017	0.01	3	3	3	UNKNOWN	SEDIMENTARY	UNKNOWN	UNKNOWN	CLAYSTONE		52.9	0.39	11.7					0.1	8.35	2.76	2.91	5.85	0.06									5	300	7	7	20
D187498		USGS		Geochemistry of rock samples from the National Geochemical Database: U.S. Geological Survey, Reston, VA.	U.S. Geological Survey	USGS		37.6667	-117.417	0.01	3	3	3	UNKNOWN	SEDIMENTARY	UNKNOWN	UNKNOWN	CLAYSTONE																							0.7	100			7
D187509		USGS		Geochemistry of rock samples from the National Geochemical Database: U.S. Geological Survey, Reston, VA.	U.S. Geological Survey	USGS		37.6667	-117.433	0.01	3	3	3	UNKNOWN	SEDIMENTARY	UNKNOWN	UNKNOWN	CLAYSTONE																							3	300	5		15
D187784		USGS		Geochemistry of rock samples from the National Geochemical Database: U.S. Geological Survey, Reston, VA.	U.S. Geological Survey	USGS		36.1333	-114.933	0.01	11	11	11	UNKNOWN	SEDIMENTARY	UNKNOWN	UNKNOWN	CLAYSTONE																						10	1.5	200	7		5		700
D187797		USGS		Geochemistry of rock samples from the National Geochemical Database: U.S. Geological Survey, Reston, VA.	U.S. Geological Survey	USGS		36.1333	-114.933	0.01	11	11	11	UNKNOWN	SEDIMENTARY	UNKNOWN	UNKNOWN	CLAYSTONE																						10	1	100	5		5
D187799		USGS		Geochemistry of rock samples from the National Geochemical Database: U.S. Geological Survey, Reston, VA.	U.S. Geological Survey	USGS		36.1333	-114.933	0.01	11	11	11	UNKNOWN	SEDIMENTARY	UNKNOWN	UNKNOWN	CLAYSTONE																						3	0.7	70	5		7
D187801		USGS		Geochemistry of rock samples from the National Geochemical Database: U.S. Geological Survey, Reston, VA.	U.S. Geological Survey	USGS		36.1333	-114.933	0.01	11	11	11	UNKNOWN	SEDIMENTARY	UNKNOWN	UNKNOWN	CLAYSTONE																						1	0.3	30			2
D187805		USGS		Geochemistry of rock samples from the National Geochemical Database: U.S. Geological Survey, Reston, VA.	U.S. Geological Survey	USGS		36.1333	-114.933	0.01	11	11	11	UNKNOWN	SEDIMENTARY	UNKNOWN	UNKNOWN	CLAYSTONE																						10	0.7	70			5
D187806		USGS		Geochemistry of rock samples from the National Geochemical Database: U.S. Geological Survey, Reston, VA.	U.S. Geological Survey	USGS		36.1333	-114.933	0.01	11	11	11	UNKNOWN	SEDIMENTARY	UNKNOWN	UNKNOWN	CLAYSTONE																						0.5	0.1	30			1.5
D187813		USGS		Geochemistry of rock samples from the National Geochemical Database: U.S. Geological Survey, Reston, VA.	U.S. Geological Survey	USGS		36.1667	-114.9	0.01	11	11	11	UNKNOWN	SEDIMENTARY	UNKNOWN	UNKNOWN	CLAYSTONE																						0.7	0.02	15			7
D187814		USGS		Geochemistry of rock samples from the National Geochemical Database: U.S. Geological Survey, Reston, VA.	U.S. Geological Survey	USGS		36.1667	-114.9	0.01	11	11	11	UNKNOWN	SEDIMENTARY	UNKNOWN	UNKNOWN	CLAYSTONE																						0.7	0.07	30			5
D187815		USGS		Geochemistry of rock samples from the National Geochemical Database: U.S. Geological Survey, Reston, VA.	U.S. Geological Survey	USGS		36.1667	-114.9	0.01	11	11	11	UNKNOWN	SEDIMENTARY	UNKNOWN	UNKNOWN	CLAYSTONE																						0.7	0.15	30			1.5
D188516		USGS		Geochemistry of rock samples from the National Geochemical Database: U.S. Geological Survey, Reston, VA.	U.S. Geological Survey	USGS		43.5792	-108.147	0.01	71	71	71	UNKNOWN	SEDIMENTARY	UNKNOWN	UNKNOWN	CLAYSTONE																							1	50	15		20		300		1.5
D188517		USGS		Geochemistry of rock samples from the National Geochemical Database: U.S. Geological Survey, Reston, VA.	U.S. Geological Survey	USGS		43.5792	-108.147	0.01	71	71	71	UNKNOWN	SEDIMENTARY	UNKNOWN	UNKNOWN	CLAYSTONE																							1	50	15		15		300		1
D190276		USGS		Geochemistry of rock samples from the National Geochemical Database: U.S. Geological Survey, Reston, VA.	U.S. Geological Survey	USGS		34.2833	-107.033	0.01	11	11	11	UNKNOWN	SEDIMENTARY	UNKNOWN	UNKNOWN	CLAYSTONE																							2	200	20	10	70
D190277		USGS		Geochemistry of rock samples from the National Geochemical Database: U.S. Geological Survey, Reston, VA.	U.S. Geological Survey	USGS		34.3667	-106.983	0.01	11	11	11	UNKNOWN	SEDIMENTARY	UNKNOWN	UNKNOWN	CLAYSTONE																							1.5	100	20	5	30
D190278		USGS		Geochemistry of rock samples from the National Geochemical Database: U.S. Geological Survey, Reston, VA.	U.S. Geological Survey	USGS		34.3667	-106.983	0.01	11	11	11	UNKNOWN	SEDIMENTARY	UNKNOWN	UNKNOWN	CLAYSTONE																							1.5	70	10		20
D190279		USGS		Geochemistry of rock samples from the National Geochemical Database: U.S. Geological Survey, Reston, VA.	U.S. Geological Survey	USGS		34.3667	-106.983	0.01	11	11	11	UNKNOWN	SEDIMENTARY	UNKNOWN	UNKNOWN	CLAYSTONE																							1	15			5
D190280		USGS		Geochemistry of rock samples from the National Geochemical Database: U.S. Geological Survey, Reston, VA.	U.S. Geological Survey	USGS		34.3667	-106.983	0.01	11	11	11	UNKNOWN	SEDIMENTARY	UNKNOWN	UNKNOWN	CLAYSTONE																							2	150	30	15	70
D190286		USGS		Geochemistry of rock samples from the National Geochemical Database: U.S. Geological Survey, Reston, VA.	U.S. Geological Survey	USGS		34.2833	-106.967	0.01	11	11	11	UNKNOWN	SEDIMENTARY	UNKNOWN	UNKNOWN	CLAYSTONE																							2	150	20	10	70
D191481		USGS		Geochemistry of rock samples from the National Geochemical Database: U.S. Geological Survey, Reston, VA.	U.S. Geological Survey	USGS		35.8875	-106.894	0.01	56	56	56	UNKNOWN	SEDIMENTARY	UNKNOWN	UNKNOWN	CLAYSTONE
D192010		USGS		Geochemistry of rock samples from the National Geochemical Database: U.S. Geological Survey, Reston, VA.	U.S. Geological Survey	USGS		36.1333	-114.933	0.01	11	11	11	UNKNOWN	SEDIMENTARY	UNKNOWN	UNKNOWN	CLAYSTONE																							1	150	10		15
D192024		USGS		Geochemistry of rock samples from the National Geochemical Database: U.S. Geological Survey, Reston, VA.	U.S. Geological Survey	USGS		36.1333	-114.933	0.01	11	11	11	UNKNOWN	SEDIMENTARY	UNKNOWN	UNKNOWN	CLAYSTONE																							1.5	200	10		20
D192025		USGS		Geochemistry of rock samples from the National Geochemical Database: U.S. Geological Survey, Reston, VA.	U.S. Geological Survey	USGS		36.1333	-114.933	0.01	11	11	11	UNKNOWN	SEDIMENTARY	UNKNOWN	UNKNOWN	CLAYSTONE																						10	1	200	10		20
D192051		USGS		Geochemistry of rock samples from the National Geochemical Database: U.S. Geological Survey, Reston, VA.	U.S. Geological Survey	USGS		36.1333	-114.917	0.01	11	11	11	UNKNOWN	SEDIMENTARY	UNKNOWN	UNKNOWN	CLAYSTONE																						5	0.15	15			3
D192055		USGS		Geochemistry of rock samples from the National Geochemical Database: U.S. Geological Survey, Reston, VA.	U.S. Geological Survey	USGS		36.1333	-114.917	0.01	11	11	11	UNKNOWN	SEDIMENTARY	UNKNOWN	UNKNOWN	CLAYSTONE																						3	0.1	10			2
D192056		USGS		Geochemistry of rock samples from the National Geochemical Database: U.S. Geological Survey, Reston, VA.	U.S. Geological Survey	USGS		36.1333	-114.917	0.01	11	11	11	UNKNOWN	SEDIMENTARY	UNKNOWN	UNKNOWN	CLAYSTONE																						3	0.1	15			1
D192057		USGS		Geochemistry of rock samples from the National Geochemical Database: U.S. Geological Survey, Reston, VA.	U.S. Geological Survey	USGS		36.1333	-114.917	0.01	11	11	11	UNKNOWN	SEDIMENTARY	UNKNOWN	UNKNOWN	CLAYSTONE																						7	0.3	70			2
D192058		USGS		Geochemistry of rock samples from the National Geochemical Database: U.S. Geological Survey, Reston, VA.	U.S. Geological Survey	USGS		36.1333	-114.917	0.01	11	11	11	UNKNOWN	SEDIMENTARY	UNKNOWN	UNKNOWN	CLAYSTONE																						5	0.2	70			2
D192059		USGS		Geochemistry of rock samples from the National Geochemical Database: U.S. Geological Survey, Reston, VA.	U.S. Geological Survey	USGS		36.1333	-114.917	0.01	11	11	11	UNKNOWN	SEDIMENTARY	UNKNOWN	UNKNOWN	CLAYSTONE																							0.15	300			2
D192060		USGS		Geochemistry of rock samples from the National Geochemical Database: U.S. Geological Survey, Reston, VA.	U.S. Geological Survey	USGS		36.1333	-114.917	0.01	11	11	11	UNKNOWN	SEDIMENTARY	UNKNOWN	UNKNOWN	CLAYSTONE																							0.5	300	7		30
D192061		USGS		Geochemistry of rock samples from the National Geochemical Database: U.S. Geological Survey, Reston, VA.	U.S. Geological Survey	USGS		36.1333	-114.917	0.01	11	11	11	UNKNOWN	SEDIMENTARY	UNKNOWN	UNKNOWN	CLAYSTONE																							1	200	7	1	20
D192067		USGS		Geochemistry of rock samples from the National Geochemical Database: U.S. Geological Survey, Reston, VA.	U.S. Geological Survey	USGS		36.1333	-114.917	0.01	11	11	11	UNKNOWN	SEDIMENTARY	UNKNOWN	UNKNOWN	CLAYSTONE																						3	0.2	20			3
D192071		USGS		Geochemistry of rock samples from the National Geochemical Database: U.S. Geological Survey, Reston, VA.	U.S. Geological Survey	USGS		36.1333	-114.917	0.01	11	11	11	UNKNOWN	SEDIMENTARY	UNKNOWN	UNKNOWN	CLAYSTONE																						5	0.3	700			5
D192074		USGS		Geochemistry of rock samples from the National Geochemical Database: U.S. Geological Survey, Reston, VA.	U.S. Geological Survey	USGS		36.1333	-114.917	0.01	11	11	11	UNKNOWN	SEDIMENTARY	UNKNOWN	UNKNOWN	CLAYSTONE																							0.7	300			3
D192271		USGS		Geochemistry of rock samples from the National Geochemical Database: U.S. Geological Survey, Reston, VA.	U.S. Geological Survey	USGS		40.85	-112.8	0.01	68	68	68	UNKNOWN	SEDIMENTARY	UNKNOWN	UNKNOWN	CLAYSTONE					0.07									20.9									0.3	7	150		100				10
D192275		USGS		Geochemistry of rock samples from the National Geochemical Database: U.S. Geological Survey, Reston, VA.	U.S. Geological Survey	USGS		40.85	-112.8	0.01	68	68	68	UNKNOWN	SEDIMENTARY	UNKNOWN	UNKNOWN	CLAYSTONE					0.04									0.78									1.5	150	200		100		1000		7
D192277		USGS		Geochemistry of rock samples from the National Geochemical Database: U.S. Geological Survey, Reston, VA.	U.S. Geological Survey	USGS		40.85	-112.8	0.01	68	68	68	UNKNOWN	SEDIMENTARY	UNKNOWN	UNKNOWN	CLAYSTONE					0.08									1.07									0.7	15	150		100		500		30
D193814		USGS		Geochemistry of rock samples from the National Geochemical Database: U.S. Geological Survey, Reston, VA.	U.S. Geological Survey	USGS		35.8875	-106.894	0.01	56	56	56	UNKNOWN	SEDIMENTARY	UNKNOWN	UNKNOWN	CLAYSTONE
D193876		USGS		Geochemistry of rock samples from the National Geochemical Database: U.S. Geological Survey, Reston, VA.	U.S. Geological Survey	USGS		42.3667	-106.3	0.01	15	16.5	18	UNKNOWN	SEDIMENTARY	UNKNOWN	UNKNOWN	CLAYSTONE
D193877		USGS		Geochemistry of rock samples from the National Geochemical Database: U.S. Geological Survey, Reston, VA.	U.S. Geological Survey	USGS		42.3667	-106.3	0.01	15	16.5	18	UNKNOWN	SEDIMENTARY	UNKNOWN	UNKNOWN	CLAYSTONE
D193878		USGS		Geochemistry of rock samples from the National Geochemical Database: U.S. Geological Survey, Reston, VA.	U.S. Geological Survey	USGS		42.3667	-106.3	0.01	15	16.5	18	UNKNOWN	SEDIMENTARY	UNKNOWN	UNKNOWN	CLAYSTONE
D195617		USGS		Geochemistry of rock samples from the National Geochemical Database: U.S. Geological Survey, Reston, VA.	U.S. Geological Survey	USGS		63	-145.5	0.01	11	14.5	18	DNAA	SEDIMENTARY	UNKNOWN	UNKNOWN	CLAYSTONE
D195617		USGS		Geochemistry of rock samples from the National Geochemical Database: U.S. Geological Survey, Reston, VA.	U.S. Geological Survey	USGS		63	-145.5	0.01	11	14.5	18	ES	SEDIMENTARY	UNKNOWN	UNKNOWN	CLAYSTONE																							5	700	200	30	150
D195623		USGS		Geochemistry of rock samples from the National Geochemical Database: U.S. Geological Survey, Reston, VA.	U.S. Geological Survey	USGS		63	-145.5	0.01	11	14.5	18	DNAA	SEDIMENTARY	UNKNOWN	UNKNOWN	CLAYSTONE
D195623		USGS		Geochemistry of rock samples from the National Geochemical Database: U.S. Geological Survey, Reston, VA.	U.S. Geological Survey	USGS		63	-145.5	0.01	11	14.5	18	ES	SEDIMENTARY	UNKNOWN	UNKNOWN	CLAYSTONE																							5	700	100	20	150
D195624		USGS		Geochemistry of rock samples from the National Geochemical Database: U.S. Geological Survey, Reston, VA.	U.S. Geological Survey	USGS		63	-145.5	0.01	11	14.5	18	DNAA	SEDIMENTARY	UNKNOWN	UNKNOWN	CLAYSTONE
D195624		USGS		Geochemistry of rock samples from the National Geochemical Database: U.S. Geological Survey, Reston, VA.	U.S. Geological Survey	USGS		63	-145.5	0.01	11	14.5	18	ES	SEDIMENTARY	UNKNOWN	UNKNOWN	CLAYSTONE																							7	700	200	30	200
D195625		USGS		Geochemistry of rock samples from the National Geochemical Database: U.S. Geological Survey, Reston, VA.	U.S. Geological Survey	USGS		63	-145.5	0.01	11	14.5	18	DNAA	SEDIMENTARY	UNKNOWN	UNKNOWN	CLAYSTONE
D195625		USGS		Geochemistry of rock samples from the National Geochemical Database: U.S. Geological Survey, Reston, VA.	U.S. Geological Survey	USGS		63	-145.5	0.01	11	14.5	18	ES	SEDIMENTARY	UNKNOWN	UNKNOWN	CLAYSTONE																							5	500	150	30	150
D195997		USGS		Geochemistry of rock samples from the National Geochemical Database: U.S. Geological Survey, Reston, VA.	U.S. Geological Survey	USGS		61.25	-151.5	0.01	11	13	15	DNAA	SEDIMENTARY	UNKNOWN	UNKNOWN	CLAYSTONE
D195997		USGS		Geochemistry of rock samples from the National Geochemical Database: U.S. Geological Survey, Reston, VA.	U.S. Geological Survey	USGS		61.25	-151.5	0.01	11	13	15	ES	SEDIMENTARY	UNKNOWN	UNKNOWN	CLAYSTONE																							1	30	15		70
D196001		USGS		Geochemistry of rock samples from the National Geochemical Database: U.S. Geological Survey, Reston, VA.	U.S. Geological Survey	USGS		61.25	-150.5	0.01	18	20	22	DNAA	SEDIMENTARY	UNKNOWN	UNKNOWN	CLAYSTONE
D196001		USGS		Geochemistry of rock samples from the National Geochemical Database: U.S. Geological Survey, Reston, VA.	U.S. Geological Survey	USGS		61.25	-150.5	0.01	18	20	22	ES	SEDIMENTARY	UNKNOWN	UNKNOWN	CLAYSTONE																							3	150	15	10	15
D196030		USGS		Geochemistry of rock samples from the National Geochemical Database: U.S. Geological Survey, Reston, VA.	U.S. Geological Survey	USGS		62.25	-151.5	0.01	8	13	18	DNAA	SEDIMENTARY	UNKNOWN	UNKNOWN	CLAYSTONE
D196030		USGS		Geochemistry of rock samples from the National Geochemical Database: U.S. Geological Survey, Reston, VA.	U.S. Geological Survey	USGS		62.25	-151.5	0.01	8	13	18	ES	SEDIMENTARY	UNKNOWN	UNKNOWN	CLAYSTONE																						10	0.5	30	30	10	100
D196035		USGS		Geochemistry of rock samples from the National Geochemical Database: U.S. Geological Survey, Reston, VA.	U.S. Geological Survey	USGS		62	-151.5	0.01	8	13	18	DNAA	SEDIMENTARY	UNKNOWN	UNKNOWN	CLAYSTONE
D196035		USGS		Geochemistry of rock samples from the National Geochemical Database: U.S. Geological Survey, Reston, VA.	U.S. Geological Survey	USGS		62	-151.5	0.01	8	13	18	ES	SEDIMENTARY	UNKNOWN	UNKNOWN	CLAYSTONE																							5	1500	100	20	100
D196043		USGS		Geochemistry of rock samples from the National Geochemical Database: U.S. Geological Survey, Reston, VA.	U.S. Geological Survey	USGS		62.25	-151.5	0.01	8	13	18	DNAA	SEDIMENTARY	UNKNOWN	UNKNOWN	CLAYSTONE
D196043		USGS		Geochemistry of rock samples from the National Geochemical Database: U.S. Geological Survey, Reston, VA.	U.S. Geological Survey	USGS		62.25	-151.5	0.01	8	13	18	ES	SEDIMENTARY	UNKNOWN	UNKNOWN	CLAYSTONE																							2	100	50	5	70
D198385		USGS		Geochemistry of rock samples from the National Geochemical Database: U.S. Geological Survey, Reston, VA.	U.S. Geological Survey	USGS		36.1278	-114.95	0.01	11	11	11	UNKNOWN	SEDIMENTARY	UNKNOWN	UNKNOWN	CLAYSTONE																						7	0.7	100	30		7
D198386		USGS		Geochemistry of rock samples from the National Geochemical Database: U.S. Geological Survey, Reston, VA.	U.S. Geological Survey	USGS		36.1278	-114.95	0.01	11	11	11	UNKNOWN	SEDIMENTARY	UNKNOWN	UNKNOWN	CLAYSTONE																							1.5	300	15	5	15
D198387		USGS		Geochemistry of rock samples from the National Geochemical Database: U.S. Geological Survey, Reston, VA.	U.S. Geological Survey	USGS		36.1278	-114.95	0.01	11	11	11	UNKNOWN	SEDIMENTARY	UNKNOWN	UNKNOWN	CLAYSTONE																							1.5	150	10	3	15
D198390		USGS		Geochemistry of rock samples from the National Geochemical Database: U.S. Geological Survey, Reston, VA.	U.S. Geological Survey	USGS		36.15	-114.917	0.01	11	11	11	UNKNOWN	SEDIMENTARY	UNKNOWN	UNKNOWN	CLAYSTONE																							3	150	30	3	20
D198420		USGS		Geochemistry of rock samples from the National Geochemical Database: U.S. Geological Survey, Reston, VA.	U.S. Geological Survey	USGS		36.5	-114.217	0.01	11	11	11	UNKNOWN	SEDIMENTARY	UNKNOWN	UNKNOWN	CLAYSTONE																						0.5	0.07	3			7
D198423		USGS		Geochemistry of rock samples from the National Geochemical Database: U.S. Geological Survey, Reston, VA.	U.S. Geological Survey	USGS		36.5	-114.217	0.01	11	11	11	UNKNOWN	SEDIMENTARY	UNKNOWN	UNKNOWN	CLAYSTONE																							1	20			5
D198426		USGS		Geochemistry of rock samples from the National Geochemical Database: U.S. Geological Survey, Reston, VA.	U.S. Geological Survey	USGS		36.3167	-114.15	0.01	11	11	11	UNKNOWN	SEDIMENTARY	UNKNOWN	UNKNOWN	CLAYSTONE																						0.3	0.1	150	15	10	7
D198434		USGS		Geochemistry of rock samples from the National Geochemical Database: U.S. Geological Survey, Reston, VA.	U.S. Geological Survey	USGS		34.2333	-113.45	0.01	3	3	3	UNKNOWN	SEDIMENTARY	UNKNOWN	UNKNOWN	CLAYSTONE																							1.5	5000	15		50		500
D198435		USGS		Geochemistry of rock samples from the National Geochemical Database: U.S. Geological Survey, Reston, VA.	U.S. Geological Survey	USGS		34.55	-114.583	0.01	3	3	3	UNKNOWN	SEDIMENTARY	UNKNOWN	UNKNOWN	CLAYSTONE																							3	200	20		30
D198436		USGS		Geochemistry of rock samples from the National Geochemical Database: U.S. Geological Survey, Reston, VA.	U.S. Geological Survey	USGS		34.55	-114.583	0.01	3	3	3	UNKNOWN	SEDIMENTARY	UNKNOWN	UNKNOWN	CLAYSTONE																							0.7	100	7		10
D198438		USGS		Geochemistry of rock samples from the National Geochemical Database: U.S. Geological Survey, Reston, VA.	U.S. Geological Survey	USGS		35.05	-117.583	0.01	3	3	3	UNKNOWN	SEDIMENTARY	UNKNOWN	UNKNOWN	CLAYSTONE																							1.5	100	5		15
D198439		USGS		Geochemistry of rock samples from the National Geochemical Database: U.S. Geological Survey, Reston, VA.	U.S. Geological Survey	USGS		35.05	-117.583	0.01	3	3	3	UNKNOWN	SEDIMENTARY	UNKNOWN	UNKNOWN	CLAYSTONE																							3	700	7	10	20
D198440		USGS		Geochemistry of rock samples from the National Geochemical Database: U.S. Geological Survey, Reston, VA.	U.S. Geological Survey	USGS		35.05	-117.583	0.01	3	3	3	UNKNOWN	SEDIMENTARY	UNKNOWN	UNKNOWN	CLAYSTONE																							1	15			3
D198441		USGS		Geochemistry of rock samples from the National Geochemical Database: U.S. Geological Survey, Reston, VA.	U.S. Geological Survey	USGS		35.05	-117.583	0.01	3	3	3	UNKNOWN	SEDIMENTARY	UNKNOWN	UNKNOWN	CLAYSTONE																							3	150	5	5	30
D198443		USGS		Geochemistry of rock samples from the National Geochemical Database: U.S. Geological Survey, Reston, VA.	U.S. Geological Survey	USGS		35.05	-117.583	0.01	3	3	3	UNKNOWN	SEDIMENTARY	UNKNOWN	UNKNOWN	CLAYSTONE																							1	70			7
D198444		USGS		Geochemistry of rock samples from the National Geochemical Database: U.S. Geological Survey, Reston, VA.	U.S. Geological Survey	USGS		35.05	-117.583	0.01	3	3	3	UNKNOWN	SEDIMENTARY	UNKNOWN	UNKNOWN	CLAYSTONE																						3	1.5	700	15		30
D198446		USGS		Geochemistry of rock samples from the National Geochemical Database: U.S. Geological Survey, Reston, VA.	U.S. Geological Survey	USGS		34.9167	-117.467	0.01	3	3	3	UNKNOWN	SEDIMENTARY	UNKNOWN	UNKNOWN	CLAYSTONE																							3	200	15	10	70				0.5
D198448		USGS		Geochemistry of rock samples from the National Geochemical Database: U.S. Geological Survey, Reston, VA.	U.S. Geological Survey	USGS		34.9167	-117.467	0.01	3	3	3	UNKNOWN	SEDIMENTARY	UNKNOWN	UNKNOWN	CLAYSTONE																							1.5	300	5	10	15
D198450		USGS		Geochemistry of rock samples from the National Geochemical Database: U.S. Geological Survey, Reston, VA.	U.S. Geological Survey	USGS		34.85	-117.467	0.01	3	3	3	UNKNOWN	SEDIMENTARY	UNKNOWN	UNKNOWN	CLAYSTONE																							2	100	5		15
D198451		USGS		Geochemistry of rock samples from the National Geochemical Database: U.S. Geological Survey, Reston, VA.	U.S. Geological Survey	USGS		34.85	-117.467	0.01	3	3	3	UNKNOWN	SEDIMENTARY	UNKNOWN	UNKNOWN	CLAYSTONE																							1.5	100			7
D198452		USGS		Geochemistry of rock samples from the National Geochemical Database: U.S. Geological Survey, Reston, VA.	U.S. Geological Survey	USGS		34.85	-117.467	0.01	3	3	3	UNKNOWN	SEDIMENTARY	UNKNOWN	UNKNOWN	CLAYSTONE																						7	1.5	150	15		30
D198455		USGS		Geochemistry of rock samples from the National Geochemical Database: U.S. Geological Survey, Reston, VA.	U.S. Geological Survey	USGS		34.85	-117.467	0.01	3	3	3	UNKNOWN	SEDIMENTARY	UNKNOWN	UNKNOWN	CLAYSTONE																							0.7	150	7		10
D198456		USGS		Geochemistry of rock samples from the National Geochemical Database: U.S. Geological Survey, Reston, VA.	U.S. Geological Survey	USGS		34.9167	-117.5	0.01	3	3	3	UNKNOWN	SEDIMENTARY	UNKNOWN	UNKNOWN	CLAYSTONE																							2	300	7	7	20
D198458		USGS		Geochemistry of rock samples from the National Geochemical Database: U.S. Geological Survey, Reston, VA.	U.S. Geological Survey	USGS		34.9833	-116.917	0.01	3	3	3	UNKNOWN	SEDIMENTARY	UNKNOWN	UNKNOWN	CLAYSTONE																							3	300	15	7	30
D198459		USGS		Geochemistry of rock samples from the National Geochemical Database: U.S. Geological Survey, Reston, VA.	U.S. Geological Survey	USGS		34.9833	-116.917	0.01	3	3	3	UNKNOWN	SEDIMENTARY	UNKNOWN	UNKNOWN	CLAYSTONE																							3	300	20	10	100
D198460		USGS		Geochemistry of rock samples from the National Geochemical Database: U.S. Geological Survey, Reston, VA.	U.S. Geological Survey	USGS		34.9833	-116.917	0.01	3	3	3	UNKNOWN	SEDIMENTARY	UNKNOWN	UNKNOWN	CLAYSTONE																							3	700	15	5	70		300
D198465		USGS		Geochemistry of rock samples from the National Geochemical Database: U.S. Geological Survey, Reston, VA.	U.S. Geological Survey	USGS		34.6	-115.483	0.01	3	3	3	UNKNOWN	SEDIMENTARY	UNKNOWN	UNKNOWN	CLAYSTONE																						7	0.7	150	7		7
D198469		USGS		Geochemistry of rock samples from the National Geochemical Database: U.S. Geological Survey, Reston, VA.	U.S. Geological Survey	USGS		36.3833	-116.45	0.01	3	3	3	UNKNOWN	SEDIMENTARY	UNKNOWN	UNKNOWN	CLAYSTONE																						3	0.015	7			2
D198470		USGS		Geochemistry of rock samples from the National Geochemical Database: U.S. Geological Survey, Reston, VA.	U.S. Geological Survey	USGS		36.3833	-116.45	0.01	3	3	3	UNKNOWN	SEDIMENTARY	UNKNOWN	UNKNOWN	CLAYSTONE																							0.5	100	7		7
D198471		USGS		Geochemistry of rock samples from the National Geochemical Database: U.S. Geological Survey, Reston, VA.	U.S. Geological Survey	USGS		36.3833	-116.45	0.01	3	3	3	UNKNOWN	SEDIMENTARY	UNKNOWN	UNKNOWN	CLAYSTONE																							0.015	5			3
D198473		USGS		Geochemistry of rock samples from the National Geochemical Database: U.S. Geological Survey, Reston, VA.	U.S. Geological Survey	USGS		36.3833	-116.45	0.01	3	3	3	UNKNOWN	SEDIMENTARY	UNKNOWN	UNKNOWN	CLAYSTONE																							0.7	150	7		7
D198474		USGS		Geochemistry of rock samples from the National Geochemical Database: U.S. Geological Survey, Reston, VA.	U.S. Geological Survey	USGS		36.3833	-116.45	0.01	3	3	3	UNKNOWN	SEDIMENTARY	UNKNOWN	UNKNOWN	CLAYSTONE																							0.05	15			7				0.7
D198476		USGS		Geochemistry of rock samples from the National Geochemical Database: U.S. Geological Survey, Reston, VA.	U.S. Geological Survey	USGS		34.3167	-113.583	0.01	3	3	3	UNKNOWN	SEDIMENTARY	UNKNOWN	UNKNOWN	CLAYSTONE																							7	1000	7		7				0.7
D198477		USGS		Geochemistry of rock samples from the National Geochemical Database: U.S. Geological Survey, Reston, VA.	U.S. Geological Survey	USGS		34.3167	-113.583	0.01	3	3	3	UNKNOWN	SEDIMENTARY	UNKNOWN	UNKNOWN	CLAYSTONE																							7	1500	7		15
D198478		USGS		Geochemistry of rock samples from the National Geochemical Database: U.S. Geological Survey, Reston, VA.	U.S. Geological Survey	USGS		34.3167	-113.583	0.01	3	3	3	UNKNOWN	SEDIMENTARY	UNKNOWN	UNKNOWN	CLAYSTONE																							5	3000	7		15
D198479		USGS		Geochemistry of rock samples from the National Geochemical Database: U.S. Geological Survey, Reston, VA.	U.S. Geological Survey	USGS		34.3667	-113.6	0.01	3	3	3	UNKNOWN	SEDIMENTARY	UNKNOWN	UNKNOWN	CLAYSTONE																							1.5	150	20	15	30
D198482		USGS		Geochemistry of rock samples from the National Geochemical Database: U.S. Geological Survey, Reston, VA.	U.S. Geological Survey	USGS		34.3667	-113.6	0.01	3	3	3	UNKNOWN	SEDIMENTARY	UNKNOWN	UNKNOWN	CLAYSTONE																							0.7	300			5
D198483		USGS		Geochemistry of rock samples from the National Geochemical Database: U.S. Geological Survey, Reston, VA.	U.S. Geological Survey	USGS		34.3667	-113.6	0.01	3	3	3	UNKNOWN	SEDIMENTARY	UNKNOWN	UNKNOWN	CLAYSTONE																						7	2	700	15	7	20
D198484		USGS		Geochemistry of rock samples from the National Geochemical Database: U.S. Geological Survey, Reston, VA.	U.S. Geological Survey	USGS		34.3667	-113.6	0.01	3	3	3	UNKNOWN	SEDIMENTARY	UNKNOWN	UNKNOWN	CLAYSTONE																							3	200	10	7	30
D198486		USGS		Geochemistry of rock samples from the National Geochemical Database: U.S. Geological Survey, Reston, VA.	U.S. Geological Survey	USGS		34.3667	-113.6	0.01	3	3	3	UNKNOWN	SEDIMENTARY	UNKNOWN	UNKNOWN	CLAYSTONE																							2	300	7	7	30
D198487		USGS		Geochemistry of rock samples from the National Geochemical Database: U.S. Geological Survey, Reston, VA.	U.S. Geological Survey	USGS		34.3667	-113.6	0.01	3	3	3	UNKNOWN	SEDIMENTARY	UNKNOWN	UNKNOWN	CLAYSTONE																						7	0.7	1000	10		7
D198488		USGS		Geochemistry of rock samples from the National Geochemical Database: U.S. Geological Survey, Reston, VA.	U.S. Geological Survey	USGS		34.3667	-113.6	0.01	3	3	3	UNKNOWN	SEDIMENTARY	UNKNOWN	UNKNOWN	CLAYSTONE																							0.5	300			7
D198489		USGS		Geochemistry of rock samples from the National Geochemical Database: U.S. Geological Survey, Reston, VA.	U.S. Geological Survey	USGS		34.3167	-113.583	0.01	3	3	3	UNKNOWN	SEDIMENTARY	UNKNOWN	UNKNOWN	CLAYSTONE																							2	1000	50	10	30		1500
D198491		USGS		Geochemistry of rock samples from the National Geochemical Database: U.S. Geological Survey, Reston, VA.	U.S. Geological Survey	USGS		34.2333	-113.45	0.01	3	3	3	UNKNOWN	SEDIMENTARY	UNKNOWN	UNKNOWN	CLAYSTONE																						1.5	0.2	70			5
D198492		USGS		Geochemistry of rock samples from the National Geochemical Database: U.S. Geological Survey, Reston, VA.	U.S. Geological Survey	USGS		34.2333	-113.45	0.01	3	3	3	UNKNOWN	SEDIMENTARY	UNKNOWN	UNKNOWN	CLAYSTONE																							2	700	30	5	30
D198493		USGS		Geochemistry of rock samples from the National Geochemical Database: U.S. Geological Survey, Reston, VA.	U.S. Geological Survey	USGS		34.2333	-113.45	0.01	3	3	3	UNKNOWN	SEDIMENTARY	UNKNOWN	UNKNOWN	CLAYSTONE																						3	0.7	3000	15		20
D198495		USGS		Geochemistry of rock samples from the National Geochemical Database: U.S. Geological Survey, Reston, VA.	U.S. Geological Survey	USGS		34.2333	-113.45	0.01	3	3	3	UNKNOWN	SEDIMENTARY	UNKNOWN	UNKNOWN	CLAYSTONE																						10	1.5	300	20		15
D198496		USGS		Geochemistry of rock samples from the National Geochemical Database: U.S. Geological Survey, Reston, VA.	U.S. Geological Survey	USGS		34.25	-113.25	0.01	3	3	3	UNKNOWN	SEDIMENTARY	UNKNOWN	UNKNOWN	CLAYSTONE																						7	0.3	150			5
D198497		USGS		Geochemistry of rock samples from the National Geochemical Database: U.S. Geological Survey, Reston, VA.	U.S. Geological Survey	USGS		34.25	-113.25	0.01	3	3	3	UNKNOWN	SEDIMENTARY	UNKNOWN	UNKNOWN	CLAYSTONE																						5	0.3	200			5
D198498		USGS		Geochemistry of rock samples from the National Geochemical Database: U.S. Geological Survey, Reston, VA.	U.S. Geological Survey	USGS		34.25	-113.25	0.01	3	3	3	UNKNOWN	SEDIMENTARY	UNKNOWN	UNKNOWN	CLAYSTONE																							1	150	7		10
D198499		USGS		Geochemistry of rock samples from the National Geochemical Database: U.S. Geological Survey, Reston, VA.	U.S. Geological Survey	USGS		34.25	-113.25	0.01	3	3	3	UNKNOWN	SEDIMENTARY	UNKNOWN	UNKNOWN	CLAYSTONE																							0.7	150	7		10
D198500		USGS		Geochemistry of rock samples from the National Geochemical Database: U.S. Geological Survey, Reston, VA.	U.S. Geological Survey	USGS		34.25	-113.25	0.01	3	3	3	UNKNOWN	SEDIMENTARY	UNKNOWN	UNKNOWN	CLAYSTONE																						7	0.3	150			3
D198501		USGS		Geochemistry of rock samples from the National Geochemical Database: U.S. Geological Survey, Reston, VA.	U.S. Geological Survey	USGS		34.25	-113.25	0.01	3	3	3	UNKNOWN	SEDIMENTARY	UNKNOWN	UNKNOWN	CLAYSTONE																							0.7	100	7		7
D198502		USGS		Geochemistry of rock samples from the National Geochemical Database: U.S. Geological Survey, Reston, VA.	U.S. Geological Survey	USGS		34.25	-113.25	0.01	3	3	3	UNKNOWN	SEDIMENTARY	UNKNOWN	UNKNOWN	CLAYSTONE																						10	0.7	150	5		7
D198503		USGS		Geochemistry of rock samples from the National Geochemical Database: U.S. Geological Survey, Reston, VA.	U.S. Geological Survey	USGS		34.25	-113.25	0.01	3	3	3	UNKNOWN	SEDIMENTARY	UNKNOWN	UNKNOWN	CLAYSTONE																						10	0.7	150	10		10
D198504		USGS		Geochemistry of rock samples from the National Geochemical Database: U.S. Geological Survey, Reston, VA.	U.S. Geological Survey	USGS		34.25	-113.25	0.01	3	3	3	UNKNOWN	SEDIMENTARY	UNKNOWN	UNKNOWN	CLAYSTONE																						3	0.3	150			3
D198505		USGS		Geochemistry of rock samples from the National Geochemical Database: U.S. Geological Survey, Reston, VA.	U.S. Geological Survey	USGS		34.25	-113.25	0.01	3	3	3	UNKNOWN	SEDIMENTARY	UNKNOWN	UNKNOWN	CLAYSTONE																							0.7	100	7		7
D198506		USGS		Geochemistry of rock samples from the National Geochemical Database: U.S. Geological Survey, Reston, VA.	U.S. Geological Survey	USGS		34.25	-113.25	0.01	3	3	3	UNKNOWN	SEDIMENTARY	UNKNOWN	UNKNOWN	CLAYSTONE																							0.3	70	5		3
D198507		USGS		Geochemistry of rock samples from the National Geochemical Database: U.S. Geological Survey, Reston, VA.	U.S. Geological Survey	USGS		34.25	-113.25	0.01	3	3	3	UNKNOWN	SEDIMENTARY	UNKNOWN	UNKNOWN	CLAYSTONE																						5	0.15	150			3
D198508		USGS		Geochemistry of rock samples from the National Geochemical Database: U.S. Geological Survey, Reston, VA.	U.S. Geological Survey	USGS		34.25	-113.25	0.01	3	3	3	UNKNOWN	SEDIMENTARY	UNKNOWN	UNKNOWN	CLAYSTONE																							0.5	150	7		5
D198509		USGS		Geochemistry of rock samples from the National Geochemical Database: U.S. Geological Survey, Reston, VA.	U.S. Geological Survey	USGS		34.55	-114.583	0.01	3	3	3	UNKNOWN	SEDIMENTARY	UNKNOWN	UNKNOWN	CLAYSTONE																							0.7	70	7		7
D198512		USGS		Geochemistry of rock samples from the National Geochemical Database: U.S. Geological Survey, Reston, VA.	U.S. Geological Survey	USGS		34.55	-114.583	0.01	3	3	3	UNKNOWN	SEDIMENTARY	UNKNOWN	UNKNOWN	CLAYSTONE																							0.7	30	7		7
D198513		USGS		Geochemistry of rock samples from the National Geochemical Database: U.S. Geological Survey, Reston, VA.	U.S. Geological Survey	USGS		34.55	-114.583	0.01	3	3	3	UNKNOWN	SEDIMENTARY	UNKNOWN	UNKNOWN	CLAYSTONE																							0.7	50	7		5
D198514		USGS		Geochemistry of rock samples from the National Geochemical Database: U.S. Geological Survey, Reston, VA.	U.S. Geological Survey	USGS		34.55	-114.583	0.01	3	3	3	UNKNOWN	SEDIMENTARY	UNKNOWN	UNKNOWN	CLAYSTONE																						5	1	150	15		20
D198539		USGS		Geochemistry of rock samples from the National Geochemical Database: U.S. Geological Survey, Reston, VA.	U.S. Geological Survey	USGS		30.25	-96.25	0.01	11	13	15	UNKNOWN	SEDIMENTARY	UNKNOWN	UNKNOWN	CLAYSTONE																							1	150			1
D198547		USGS		Geochemistry of rock samples from the National Geochemical Database: U.S. Geological Survey, Reston, VA.	U.S. Geological Survey	USGS		30.875	-95.125	0.01	11	13	15	UNKNOWN	SEDIMENTARY	UNKNOWN	UNKNOWN	CLAYSTONE																							2	100	15	5	20
D198558		USGS		Geochemistry of rock samples from the National Geochemical Database: U.S. Geological Survey, Reston, VA.	U.S. Geological Survey	USGS		31.125	-93.625	0.01	11	13	15	UNKNOWN	SEDIMENTARY	UNKNOWN	UNKNOWN	CLAYSTONE																							1.5	15			10
D199487		USGS		Geochemistry of rock samples from the National Geochemical Database: U.S. Geological Survey, Reston, VA.	U.S. Geological Survey	USGS		39.6319	-113.972	0.01	8	13	18	UNKNOWN	SEDIMENTARY	UNKNOWN	UNKNOWN	CLAYSTONE																						16	1.5	930	20	10	22
D201541		USGS		Geochemistry of rock samples from the National Geochemical Database: U.S. Geological Survey, Reston, VA.	U.S. Geological Survey	USGS		34.25	-113.25	0.01	11	11	11	UNKNOWN	SEDIMENTARY	UNKNOWN	UNKNOWN	CLAYSTONE																							3	150	50	10	50
D201544		USGS		Geochemistry of rock samples from the National Geochemical Database: U.S. Geological Survey, Reston, VA.	U.S. Geological Survey	USGS		34.25	-113.25	0.01	11	11	11	UNKNOWN	SEDIMENTARY	UNKNOWN	UNKNOWN	CLAYSTONE																							7	200	70	50	70
D201547		USGS		Geochemistry of rock samples from the National Geochemical Database: U.S. Geological Survey, Reston, VA.	U.S. Geological Survey	USGS		34.25	-113.25	0.01	11	11	11	UNKNOWN	SEDIMENTARY	UNKNOWN	UNKNOWN	CLAYSTONE																							2	150	20	10	50
D201741		USGS		Geochemistry of rock samples from the National Geochemical Database: U.S. Geological Survey, Reston, VA.	U.S. Geological Survey	USGS		42.6	-112.717	0.01	68	68	68	UNKNOWN	SEDIMENTARY	UNKNOWN	UNKNOWN	CLAYSTONE					0.06									1.32							0.072		5	15	150		200				3
D201761		USGS		Geochemistry of rock samples from the National Geochemical Database: U.S. Geological Survey, Reston, VA.	U.S. Geological Survey	USGS		41.15	-115.681	0.01	71	71	71	UNKNOWN	SEDIMENTARY	UNKNOWN	UNKNOWN	CLAYSTONE																							1.5	70	30	3	30				0.7
D201762		USGS		Geochemistry of rock samples from the National Geochemical Database: U.S. Geological Survey, Reston, VA.	U.S. Geological Survey	USGS		41.15	-115.681	0.01	71	71	71	UNKNOWN	SEDIMENTARY	UNKNOWN	UNKNOWN	CLAYSTONE																							1.5	70	30	3	20				0.7
D201763		USGS		Geochemistry of rock samples from the National Geochemical Database: U.S. Geological Survey, Reston, VA.	U.S. Geological Survey	USGS		41.15	-115.681	0.01	71	71	71	UNKNOWN	SEDIMENTARY	UNKNOWN	UNKNOWN	CLAYSTONE																							1	70	30	3	30				0.7
D201764		USGS		Geochemistry of rock samples from the National Geochemical Database: U.S. Geological Survey, Reston, VA.	U.S. Geological Survey	USGS		41.15	-115.681	0.01	71	71	71	UNKNOWN	SEDIMENTARY	UNKNOWN	UNKNOWN	CLAYSTONE																							1.5	70	30	3	20				0.5
D201765		USGS		Geochemistry of rock samples from the National Geochemical Database: U.S. Geological Survey, Reston, VA.	U.S. Geological Survey	USGS		41.15	-115.681	0.01	71	71	71	UNKNOWN	SEDIMENTARY	UNKNOWN	UNKNOWN	CLAYSTONE																							1.5	70	20	3	15
D201766		USGS		Geochemistry of rock samples from the National Geochemical Database: U.S. Geological Survey, Reston, VA.	U.S. Geological Survey	USGS		41.15	-115.681	0.01	71	71	71	UNKNOWN	SEDIMENTARY	UNKNOWN	UNKNOWN	CLAYSTONE																							1.5	70	30	3	20
D201768		USGS		Geochemistry of rock samples from the National Geochemical Database: U.S. Geological Survey, Reston, VA.	U.S. Geological Survey	USGS		40.4028	-114.196	0.01	71	71	71	UNKNOWN	SEDIMENTARY	UNKNOWN	UNKNOWN	CLAYSTONE																							3	150	70	10	30
D204071		USGS		Geochemistry of rock samples from the National Geochemical Database: U.S. Geological Survey, Reston, VA.	U.S. Geological Survey	USGS		41.8333	-111.3	0.01	68	68	68	UNKNOWN	SEDIMENTARY	UNKNOWN	UNKNOWN	CLAYSTONE														5.64							0.052		2	70	150		200		700		7
D204087		USGS		Geochemistry of rock samples from the National Geochemical Database: U.S. Geological Survey, Reston, VA.	U.S. Geological Survey	USGS		41.4333	-112.458	0.01	68	68	68	UNKNOWN	SEDIMENTARY	UNKNOWN	UNKNOWN	CLAYSTONE					0.05									1.12							0.048		1.5	10	150		70				10
D204091		USGS		Geochemistry of rock samples from the National Geochemical Database: U.S. Geological Survey, Reston, VA.	U.S. Geological Survey	USGS		40.6833	-112.567	0.01	68	68	68	UNKNOWN	SEDIMENTARY	UNKNOWN	UNKNOWN	CLAYSTONE					0.11									16.1							0.174		1.5	30	500		300		1500		7
D205813		USGS		Geochemistry of rock samples from the National Geochemical Database: U.S. Geological Survey, Reston, VA.	U.S. Geological Survey	USGS		63.75	-148.75	0.01	11	11	11	DNAA	SEDIMENTARY	UNKNOWN	UNKNOWN	CLAYSTONE
D205813		USGS		Geochemistry of rock samples from the National Geochemical Database: U.S. Geological Survey, Reston, VA.	U.S. Geological Survey	USGS		63.75	-148.75	0.01	11	11	11	ES	SEDIMENTARY	UNKNOWN	UNKNOWN	CLAYSTONE																							2	100	30	5	50
D205814		USGS		Geochemistry of rock samples from the National Geochemical Database: U.S. Geological Survey, Reston, VA.	U.S. Geological Survey	USGS		63.75	-148.75	0.01	11	11	11	DNAA	SEDIMENTARY	UNKNOWN	UNKNOWN	CLAYSTONE
D205814		USGS		Geochemistry of rock samples from the National Geochemical Database: U.S. Geological Survey, Reston, VA.	U.S. Geological Survey	USGS		63.75	-148.75	0.01	11	11	11	ES	SEDIMENTARY	UNKNOWN	UNKNOWN	CLAYSTONE																						10	7	2000	20	20	300				1
D205815		USGS		Geochemistry of rock samples from the National Geochemical Database: U.S. Geological Survey, Reston, VA.	U.S. Geological Survey	USGS		63.75	-148.75	0.01	11	11	11	DNAA	SEDIMENTARY	UNKNOWN	UNKNOWN	CLAYSTONE
D205815		USGS		Geochemistry of rock samples from the National Geochemical Database: U.S. Geological Survey, Reston, VA.	U.S. Geological Survey	USGS		63.75	-148.75	0.01	11	11	11	ES	SEDIMENTARY	UNKNOWN	UNKNOWN	CLAYSTONE																							5	700	50	15	70
D205816		USGS		Geochemistry of rock samples from the National Geochemical Database: U.S. Geological Survey, Reston, VA.	U.S. Geological Survey	USGS		63.75	-148.75	0.01	11	11	11	DNAA	SEDIMENTARY	UNKNOWN	UNKNOWN	CLAYSTONE
D205816		USGS		Geochemistry of rock samples from the National Geochemical Database: U.S. Geological Survey, Reston, VA.	U.S. Geological Survey	USGS		63.75	-148.75	0.01	11	11	11	ES	SEDIMENTARY	UNKNOWN	UNKNOWN	CLAYSTONE																							5	700	50	20	300				1
D206053		USGS		Geochemistry of rock samples from the National Geochemical Database: U.S. Geological Survey, Reston, VA.	U.S. Geological Survey	USGS		37.4069	-109.185	0.01	56	56	56	UNKNOWN	SEDIMENTARY	UNKNOWN	UNKNOWN	CLAYSTONE																							1.7	270	8.9	9.2	7.9
D206063		USGS		Geochemistry of rock samples from the National Geochemical Database: U.S. Geological Survey, Reston, VA.	U.S. Geological Survey	USGS		37.6581	-109.244	0.01	56	56	56	UNKNOWN	SEDIMENTARY	UNKNOWN	UNKNOWN	CLAYSTONE																						35	1		16	4	5
D206559		USGS		Geochemistry of rock samples from the National Geochemical Database: U.S. Geological Survey, Reston, VA.	U.S. Geological Survey	USGS		43.8931	-110.19	0.01	68	68	68	UNKNOWN	SEDIMENTARY	UNKNOWN	UNKNOWN	CLAYSTONE																							3	150	700	5	150				3
D206560		USGS		Geochemistry of rock samples from the National Geochemical Database: U.S. Geological Survey, Reston, VA.	U.S. Geological Survey	USGS		43.8931	-110.19	0.01	68	68	68	UNKNOWN	SEDIMENTARY	UNKNOWN	UNKNOWN	CLAYSTONE																						7	1.5	70	150	3	50		300		0.7
D206561		USGS		Geochemistry of rock samples from the National Geochemical Database: U.S. Geological Survey, Reston, VA.	U.S. Geological Survey	USGS		43.8931	-110.19	0.01	68	68	68	UNKNOWN	SEDIMENTARY	UNKNOWN	UNKNOWN	CLAYSTONE																							1.5	150	70	10	150
D207285		USGS		Geochemistry of rock samples from the National Geochemical Database: U.S. Geological Survey, Reston, VA.	U.S. Geological Survey	USGS		38.0833	-109.567	0.01	59	59	59	UNKNOWN	SEDIMENTARY	UNKNOWN	UNKNOWN	CLAYSTONE																						31	2.3	270	47	66	22
D207316		USGS		Geochemistry of rock samples from the National Geochemical Database: U.S. Geological Survey, Reston, VA.	U.S. Geological Survey	USGS		38.15	-109.65	0.01	59	59	59	UNKNOWN	SEDIMENTARY	UNKNOWN	UNKNOWN	CLAYSTONE																						32	2.2	230	50	100	26
D207660		USGS		Geochemistry of rock samples from the National Geochemical Database: U.S. Geological Survey, Reston, VA.	U.S. Geological Survey	USGS		40.0861	-106.371	0.01	22	22	22	UNKNOWN	SEDIMENTARY	UNKNOWN	UNKNOWN	CLAYSTONE																						31	3.3	200	11	6.8	21		99
D207662		USGS		Geochemistry of rock samples from the National Geochemical Database: U.S. Geological Survey, Reston, VA.	U.S. Geological Survey	USGS		40.0883	-106.369	0.01	22	22	22	UNKNOWN	SEDIMENTARY	UNKNOWN	UNKNOWN	CLAYSTONE																						29	1.7	720	4.2	3.1	29		61
D207663		USGS		Geochemistry of rock samples from the National Geochemical Database: U.S. Geological Survey, Reston, VA.	U.S. Geological Survey	USGS		40.0883	-106.369	0.01	22	22	22	UNKNOWN	SEDIMENTARY	UNKNOWN	UNKNOWN	CLAYSTONE																						29	2.6	310	6.5	4.3	23		82
D207664		USGS		Geochemistry of rock samples from the National Geochemical Database: U.S. Geological Survey, Reston, VA.	U.S. Geological Survey	USGS		40.0883	-106.369	0.01	22	22	22	UNKNOWN	SEDIMENTARY	UNKNOWN	UNKNOWN	CLAYSTONE																						29	2.1	440	4.7	2.7	27		62
D207673		USGS		Geochemistry of rock samples from the National Geochemical Database: U.S. Geological Survey, Reston, VA.	U.S. Geological Survey	USGS		40.0983	-106.356	0.01	22	22	22	UNKNOWN	SEDIMENTARY	UNKNOWN	UNKNOWN	CLAYSTONE																						29	2.5	430	6.5	4.5	34		56
D207676		USGS		Geochemistry of rock samples from the National Geochemical Database: U.S. Geological Survey, Reston, VA.	U.S. Geological Survey	USGS		40.0972	-106.272	0.01	11	11	11	UNKNOWN	SEDIMENTARY	UNKNOWN	UNKNOWN	CLAYSTONE																						35	2.4		16	13	17		61
D207677		USGS		Geochemistry of rock samples from the National Geochemical Database: U.S. Geological Survey, Reston, VA.	U.S. Geological Survey	USGS		40.0972	-106.272	0.01	11	11	11	UNKNOWN	SEDIMENTARY	UNKNOWN	UNKNOWN	CLAYSTONE																						37	3		18	9.6	22		81
D207678		USGS		Geochemistry of rock samples from the National Geochemical Database: U.S. Geological Survey, Reston, VA.	U.S. Geological Survey	USGS		40.0972	-106.272	0.01	11	11	11	UNKNOWN	SEDIMENTARY	UNKNOWN	UNKNOWN	CLAYSTONE																						32	3.4		20	13	28		110
D207681		USGS		Geochemistry of rock samples from the National Geochemical Database: U.S. Geological Survey, Reston, VA.	U.S. Geological Survey	USGS		40.0972	-106.272	0.01	11	11	11	UNKNOWN	SEDIMENTARY	UNKNOWN	UNKNOWN	CLAYSTONE																						36	3.5	240	11	6.3	19
D207702		USGS		Geochemistry of rock samples from the National Geochemical Database: U.S. Geological Survey, Reston, VA.	U.S. Geological Survey	USGS		40.0997	-106.272	0.01	11	11	11	UNKNOWN	SEDIMENTARY	UNKNOWN	UNKNOWN	CLAYSTONE																						30	3.4	260	16	14	20
D207720		USGS		Geochemistry of rock samples from the National Geochemical Database: U.S. Geological Survey, Reston, VA.	U.S. Geological Survey	USGS		40.6214	-106.168	0.01	18	18	18	UNKNOWN	SEDIMENTARY	UNKNOWN	UNKNOWN	CLAYSTONE																						26	4.6	310	35	18	41		200
D207721		USGS		Geochemistry of rock samples from the National Geochemical Database: U.S. Geological Survey, Reston, VA.	U.S. Geological Survey	USGS		40.6244	-106.177	0.01	18	18	18	UNKNOWN	SEDIMENTARY	UNKNOWN	UNKNOWN	CLAYSTONE																						27	3.7	240	35	17	31		140
D208718		USGS		Geochemistry of rock samples from the National Geochemical Database: U.S. Geological Survey, Reston, VA.	U.S. Geological Survey	USGS		32.1667	-109.883	0.01	2	2	2	UNKNOWN	SEDIMENTARY	UNKNOWN	UNKNOWN	CLAYSTONE
D208719		USGS		Geochemistry of rock samples from the National Geochemical Database: U.S. Geological Survey, Reston, VA.	U.S. Geological Survey	USGS		32.1667	-109.883	0.01	2	2	2	UNKNOWN	SEDIMENTARY	UNKNOWN	UNKNOWN	CLAYSTONE
D208606		USGS		Geochemistry of rock samples from the National Geochemical Database: U.S. Geological Survey, Reston, VA.	U.S. Geological Survey	USGS		40.4822	-106.423	0.01	18	18	18	UNKNOWN	SEDIMENTARY	UNKNOWN	UNKNOWN	CLAYSTONE																						30	3.8	290	19	9.4	31		140
D208607		USGS		Geochemistry of rock samples from the National Geochemical Database: U.S. Geological Survey, Reston, VA.	U.S. Geological Survey	USGS		40.45	-106.354	0.01	18	18	18	UNKNOWN	SEDIMENTARY	UNKNOWN	UNKNOWN	CLAYSTONE																						38	3	360	18	12	39		110
D208608		USGS		Geochemistry of rock samples from the National Geochemical Database: U.S. Geological Survey, Reston, VA.	U.S. Geological Survey	USGS		40.4475	-106.352	0.01	18	18	18	UNKNOWN	SEDIMENTARY	UNKNOWN	UNKNOWN	CLAYSTONE																						34	4.6	390	27	15	53		180
D208610		USGS		Geochemistry of rock samples from the National Geochemical Database: U.S. Geological Survey, Reston, VA.	U.S. Geological Survey	USGS		40.6	-107.286	0.01	65	65	65	UNKNOWN	SEDIMENTARY	UNKNOWN	UNKNOWN	CLAYSTONE																						31	2.8		14	6.8	52		110
D208715		USGS		Geochemistry of rock samples from the National Geochemical Database: U.S. Geological Survey, Reston, VA.	U.S. Geological Survey	USGS		32.1667	-109.883	0.01	2	2	2	UNKNOWN	SEDIMENTARY	UNKNOWN	UNKNOWN	CLAYSTONE
D208716		USGS		Geochemistry of rock samples from the National Geochemical Database: U.S. Geological Survey, Reston, VA.	U.S. Geological Survey	USGS		32.1667	-109.883	0.01	2	2	2	UNKNOWN	SEDIMENTARY	UNKNOWN	UNKNOWN	CLAYSTONE
D208717		USGS		Geochemistry of rock samples from the National Geochemical Database: U.S. Geological Survey, Reston, VA.	U.S. Geological Survey	USGS		32.1667	-109.883	0.01	2	2	2	UNKNOWN	SEDIMENTARY	UNKNOWN	UNKNOWN	CLAYSTONE
D208720		USGS		Geochemistry of rock samples from the National Geochemical Database: U.S. Geological Survey, Reston, VA.	U.S. Geological Survey	USGS		32.1667	-109.883	0.01	2	2	2	UNKNOWN	SEDIMENTARY	UNKNOWN	UNKNOWN	CLAYSTONE
D208721		USGS		Geochemistry of rock samples from the National Geochemical Database: U.S. Geological Survey, Reston, VA.	U.S. Geological Survey	USGS		32.1667	-109.883	0.01	2	2	2	UNKNOWN	SEDIMENTARY	UNKNOWN	UNKNOWN	CLAYSTONE
D208722		USGS		Geochemistry of rock samples from the National Geochemical Database: U.S. Geological Survey, Reston, VA.	U.S. Geological Survey	USGS		32.1667	-109.883	0.01	2	2	2	UNKNOWN	SEDIMENTARY	UNKNOWN	UNKNOWN	CLAYSTONE
D208723		USGS		Geochemistry of rock samples from the National Geochemical Database: U.S. Geological Survey, Reston, VA.	U.S. Geological Survey	USGS		32.1667	-109.883	0.01	2	2	2	UNKNOWN	SEDIMENTARY	UNKNOWN	UNKNOWN	CLAYSTONE
D208724		USGS		Geochemistry of rock samples from the National Geochemical Database: U.S. Geological Survey, Reston, VA.	U.S. Geological Survey	USGS		32.1667	-109.883	0.01	2	2	2	UNKNOWN	SEDIMENTARY	UNKNOWN	UNKNOWN	CLAYSTONE
D208725		USGS		Geochemistry of rock samples from the National Geochemical Database: U.S. Geological Survey, Reston, VA.	U.S. Geological Survey	USGS		32.1667	-109.883	0.01	2	2	2	UNKNOWN	SEDIMENTARY	UNKNOWN	UNKNOWN	CLAYSTONE
D208726		USGS		Geochemistry of rock samples from the National Geochemical Database: U.S. Geological Survey, Reston, VA.	U.S. Geological Survey	USGS		32.1667	-109.883	0.01	2	2	2	UNKNOWN	SEDIMENTARY	UNKNOWN	UNKNOWN	CLAYSTONE
D208727		USGS		Geochemistry of rock samples from the National Geochemical Database: U.S. Geological Survey, Reston, VA.	U.S. Geological Survey	USGS		32.1667	-109.883	0.01	2	2	2	UNKNOWN	SEDIMENTARY	UNKNOWN	UNKNOWN	CLAYSTONE
D208728		USGS		Geochemistry of rock samples from the National Geochemical Database: U.S. Geological Survey, Reston, VA.	U.S. Geological Survey	USGS		32.1667	-109.883	0.01	2	2	2	UNKNOWN	SEDIMENTARY	UNKNOWN	UNKNOWN	CLAYSTONE
D208729		USGS		Geochemistry of rock samples from the National Geochemical Database: U.S. Geological Survey, Reston, VA.	U.S. Geological Survey	USGS		32.1667	-109.883	0.01	2	2	2	UNKNOWN	SEDIMENTARY	UNKNOWN	UNKNOWN	CLAYSTONE
D208730		USGS		Geochemistry of rock samples from the National Geochemical Database: U.S. Geological Survey, Reston, VA.	U.S. Geological Survey	USGS		32.1667	-109.883	0.01	2	2	2	UNKNOWN	SEDIMENTARY	UNKNOWN	UNKNOWN	CLAYSTONE
D208885		USGS		Geochemistry of rock samples from the National Geochemical Database: U.S. Geological Survey, Reston, VA.	U.S. Geological Survey	USGS		40.1736	-108.349	0.01	22	22	22	UNKNOWN	SEDIMENTARY	UNKNOWN	UNKNOWN	CLAYSTONE																						36	1.4		15	1.9	61
D208886		USGS		Geochemistry of rock samples from the National Geochemical Database: U.S. Geological Survey, Reston, VA.	U.S. Geological Survey	USGS		40.1731	-108.346	0.01	22	22	22	UNKNOWN	SEDIMENTARY	UNKNOWN	UNKNOWN	CLAYSTONE																						37	1.6		20	5.7	84		54
D208887		USGS		Geochemistry of rock samples from the National Geochemical Database: U.S. Geological Survey, Reston, VA.	U.S. Geological Survey	USGS		40.1731	-108.346	0.01	22	22	22	UNKNOWN	SEDIMENTARY	UNKNOWN	UNKNOWN	CLAYSTONE																						38	1.8		13	6.3	40
D209130		USGS		Geochemistry of rock samples from the National Geochemical Database: U.S. Geological Survey, Reston, VA.	U.S. Geological Survey	USGS		36.6333	-109.267	0.01	56	56	56	UNKNOWN	SEDIMENTARY	UNKNOWN	UNKNOWN	CLAYSTONE																						31	3.9	420		9.9	29		57
D209131		USGS		Geochemistry of rock samples from the National Geochemical Database: U.S. Geological Survey, Reston, VA.	U.S. Geological Survey	USGS		36.6333	-109.267	0.01	56	56	56	UNKNOWN	SEDIMENTARY	UNKNOWN	UNKNOWN	CLAYSTONE																						34	0.83	730		15	11
D213744		USGS		Geochemistry of rock samples from the National Geochemical Database: U.S. Geological Survey, Reston, VA.	U.S. Geological Survey	USGS		35.5097	-108.215	0.01	56	56	56	UNKNOWN	SEDIMENTARY	UNKNOWN	UNKNOWN	CLAYSTONE						1.71		0.58														36	1.7	230	11	8.9	13
D213761		USGS		Geochemistry of rock samples from the National Geochemical Database: U.S. Geological Survey, Reston, VA.	U.S. Geological Survey	USGS		35.5097	-108.215	0.01	56	56	56	UNKNOWN	SEDIMENTARY	UNKNOWN	UNKNOWN	CLAYSTONE						2.49		1.33														31	3.2	390	10	7.8	20
D214163		USGS		Geochemistry of rock samples from the National Geochemical Database: U.S. Geological Survey, Reston, VA.	U.S. Geological Survey	USGS		42.3153	-105.094	0.01	15	15	15	UNKNOWN	SEDIMENTARY	UNKNOWN	UNKNOWN	CLAYSTONE																							1.9	300	17	7	11
D214509		USGS		Geochemistry of rock samples from the National Geochemical Database: U.S. Geological Survey, Reston, VA.	U.S. Geological Survey	USGS		39.9978	-108.396	0.01	18	18	18	UNKNOWN	SEDIMENTARY	UNKNOWN	UNKNOWN	CLAYSTONE																						24	2.9	690	20	11	23
D214573		USGS		Geochemistry of rock samples from the National Geochemical Database: U.S. Geological Survey, Reston, VA.	U.S. Geological Survey	USGS		38.0806	-110.635	0.01	56	56	56	UNKNOWN	SEDIMENTARY	UNKNOWN	UNKNOWN	CLAYSTONE																						38	1.4		16	9	25
D214590		USGS		Geochemistry of rock samples from the National Geochemical Database: U.S. Geological Survey, Reston, VA.	U.S. Geological Survey	USGS		38.4	-108.883	0.01	56	56	56	UNKNOWN	SEDIMENTARY	UNKNOWN	UNKNOWN	CLAYSTONE																							0.78		12	7.5	62				7.6
D214591		USGS		Geochemistry of rock samples from the National Geochemical Database: U.S. Geological Survey, Reston, VA.	U.S. Geological Survey	USGS		38.4333	-108.817	0.01	56	56	56	UNKNOWN	SEDIMENTARY	UNKNOWN	UNKNOWN	CLAYSTONE																						26	1.7		24	8.5	120		94
D214595		USGS		Geochemistry of rock samples from the National Geochemical Database: U.S. Geological Survey, Reston, VA.	U.S. Geological Survey	USGS		38.3589	-108.956	0.01	56	56	56	UNKNOWN	SEDIMENTARY	UNKNOWN	UNKNOWN	CLAYSTONE																						37	1.3		15	7.1	9.2		120
D214597		USGS		Geochemistry of rock samples from the National Geochemical Database: U.S. Geological Survey, Reston, VA.	U.S. Geological Survey	USGS		38.4333	-108.817	0.01	56	56	56	UNKNOWN	SEDIMENTARY	UNKNOWN	UNKNOWN	CLAYSTONE																						25	1.7		22	7.8	130		110
D214630		USGS		Geochemistry of rock samples from the National Geochemical Database: U.S. Geological Survey, Reston, VA.	U.S. Geological Survey	USGS		37.6575	-110.006	0.01	59	59	59	UNKNOWN	SEDIMENTARY	UNKNOWN	UNKNOWN	CLAYSTONE																						38	0.47		38	29	45
D214633		USGS		Geochemistry of rock samples from the National Geochemical Database: U.S. Geological Survey, Reston, VA.	U.S. Geological Survey	USGS		37.7803	-110.653	0.01	56	56	56	UNKNOWN	SEDIMENTARY	UNKNOWN	UNKNOWN	CLAYSTONE																						28	2.8		20	9.7	36		150
D214635		USGS		Geochemistry of rock samples from the National Geochemical Database: U.S. Geological Survey, Reston, VA.	U.S. Geological Survey	USGS		37.7314	-110.682	0.01	56	56	56	UNKNOWN	SEDIMENTARY	UNKNOWN	UNKNOWN	CLAYSTONE																						28	1.4		17	5.3	40
D214638		USGS		Geochemistry of rock samples from the National Geochemical Database: U.S. Geological Survey, Reston, VA.	U.S. Geological Survey	USGS		37.75	-110.7	0.01	56	56	56	UNKNOWN	SEDIMENTARY	UNKNOWN	UNKNOWN	CLAYSTONE																						29	1.6		16	12	17
D214640		USGS		Geochemistry of rock samples from the National Geochemical Database: U.S. Geological Survey, Reston, VA.	U.S. Geological Survey	USGS		37.0281	-110.234	0.01	59	59	59	UNKNOWN	SEDIMENTARY	UNKNOWN	UNKNOWN	CLAYSTONE																						31	1.5		21	5.4	190
D214645		USGS		Geochemistry of rock samples from the National Geochemical Database: U.S. Geological Survey, Reston, VA.	U.S. Geological Survey	USGS		37.0458	-110.356	0.01	59	59	59	UNKNOWN	SEDIMENTARY	UNKNOWN	UNKNOWN	CLAYSTONE																						34	0.61		19	20					23
D214646		USGS		Geochemistry of rock samples from the National Geochemical Database: U.S. Geological Survey, Reston, VA.	U.S. Geological Survey	USGS		37.0389	-110.342	0.01	59	59	59	UNKNOWN	SEDIMENTARY	UNKNOWN	UNKNOWN	CLAYSTONE																						22	1.8		13	4.7	24
D214650		USGS		Geochemistry of rock samples from the National Geochemical Database: U.S. Geological Survey, Reston, VA.	U.S. Geological Survey	USGS		37.0089	-110.361	0.01	59	59	59	UNKNOWN	SEDIMENTARY	UNKNOWN	UNKNOWN	CLAYSTONE																						32	1.1		25	4.8	340		120
D214656		USGS		Geochemistry of rock samples from the National Geochemical Database: U.S. Geological Survey, Reston, VA.	U.S. Geological Survey	USGS		37.9333	-108.833	0.01	56	56	56	UNKNOWN	SEDIMENTARY	UNKNOWN	UNKNOWN	CLAYSTONE																						36	0.73	230			23
D214658		USGS		Geochemistry of rock samples from the National Geochemical Database: U.S. Geological Survey, Reston, VA.	U.S. Geological Survey	USGS		37.5833	-109.167	0.01	56	56	56	UNKNOWN	SEDIMENTARY	UNKNOWN	UNKNOWN	CLAYSTONE																						30	1.9		11	6.8	23
D214672		USGS		Geochemistry of rock samples from the National Geochemical Database: U.S. Geological Survey, Reston, VA.	U.S. Geological Survey	USGS		37.9333	-108.833	0.01	56	56	56	UNKNOWN	SEDIMENTARY	UNKNOWN	UNKNOWN	CLAYSTONE																						37	0.76	270		17
D214767		USGS		Geochemistry of rock samples from the National Geochemical Database: U.S. Geological Survey, Reston, VA.	U.S. Geological Survey	USGS		36.85	-108.4	0.01	65	65	65	UNKNOWN	SEDIMENTARY	UNKNOWN	UNKNOWN	CLAYSTONE																						26	2.2	220	14	21	46
D214777		USGS		Geochemistry of rock samples from the National Geochemical Database: U.S. Geological Survey, Reston, VA.	U.S. Geological Survey	USGS		35.2	-108.133	0.01	70	70	70	UNKNOWN	SEDIMENTARY	UNKNOWN	UNKNOWN	CLAYSTONE																						31	1.2		17	5.8	1000
D214798		USGS		Geochemistry of rock samples from the National Geochemical Database: U.S. Geological Survey, Reston, VA.	U.S. Geological Survey	USGS		36.9	-109.3	0.01	56	56	56	UNKNOWN	SEDIMENTARY	UNKNOWN	UNKNOWN	CLAYSTONE																						26	3.5	250	29	15	29		68
D214810		USGS		Geochemistry of rock samples from the National Geochemical Database: U.S. Geological Survey, Reston, VA.	U.S. Geological Survey	USGS		36.2	-109.867	0.01	65	65	65	UNKNOWN	SEDIMENTARY	UNKNOWN	UNKNOWN	CLAYSTONE																						25	2		24	10	40		82
D214843		USGS		Geochemistry of rock samples from the National Geochemical Database: U.S. Geological Survey, Reston, VA.	U.S. Geological Survey	USGS		35.7492	-106.802	0.01	71	71	71	UNKNOWN	SEDIMENTARY	UNKNOWN	UNKNOWN	CLAYSTONE																						39	1.1	500	3.4		110		97
D215056		USGS		Geochemistry of rock samples from the National Geochemical Database: U.S. Geological Survey, Reston, VA.	U.S. Geological Survey	USGS		40.2719	-107.892	0.01	65	65	65	UNKNOWN	SEDIMENTARY	UNKNOWN	UNKNOWN	CLAYSTONE		61	0.52	12.2					0.03	2.3	5.08	0.5	2.25	0.1								21	0.93	260	31	12	36		140
D215061		USGS		Geochemistry of rock samples from the National Geochemical Database: U.S. Geological Survey, Reston, VA.	U.S. Geological Survey	USGS		38.8806	-111.235	0.01	65	65	65	UNKNOWN	SEDIMENTARY	UNKNOWN	UNKNOWN	CLAYSTONE		52.8	0.49	12.4						2.9	9.17	0.8	2.76	0.2								19	1.9	220	26	9	21		110
D215062		USGS		Geochemistry of rock samples from the National Geochemical Database: U.S. Geological Survey, Reston, VA.	U.S. Geological Survey	USGS		36.1228	-107.829	0.01	65	65	65	UNKNOWN	SEDIMENTARY	UNKNOWN	UNKNOWN	CLAYSTONE		60.1	0.65	20.4						1.4	0.65	1.9	1.99									21	2.3	59	21	12	27		110
D215064		USGS		Geochemistry of rock samples from the National Geochemical Database: U.S. Geological Survey, Reston, VA.	U.S. Geological Survey	USGS		40.2719	-107.892	0.01	65	65	65	UNKNOWN	SEDIMENTARY	UNKNOWN	UNKNOWN	CLAYSTONE		34.7	0.39	8.59					0.41	3.7	5.87	0.3	1.27	0.2								9.9	5.5	1400	5.6	2.4	23		80
D215067		USGS		Geochemistry of rock samples from the National Geochemical Database: U.S. Geological Survey, Reston, VA.	U.S. Geological Survey	USGS		42.0253	-107.072	0.01	65	65	65	UNKNOWN	SEDIMENTARY	UNKNOWN	UNKNOWN	CLAYSTONE		59.6	0.6	13.3					0.1	1.5	1.11		2.21	0.2								18	2	650	25	10	22		88
D215069		USGS		Geochemistry of rock samples from the National Geochemical Database: U.S. Geological Survey, Reston, VA.	U.S. Geological Survey	USGS		36.1228	-107.829	0.01	65	65	65	UNKNOWN	SEDIMENTARY	UNKNOWN	UNKNOWN	CLAYSTONE		65.3	0.65	15.5						1.3	0.78	1.6	2.94									25	2.9	62	43	37	34		67
D215077		USGS		Geochemistry of rock samples from the National Geochemical Database: U.S. Geological Survey, Reston, VA.	U.S. Geological Survey	USGS		42.0253	-107.072	0.01	65	65	65	UNKNOWN	SEDIMENTARY	UNKNOWN	UNKNOWN	CLAYSTONE		61.7	0.7	17.6					0.1	1.5	0.73		2.45	0.2								23	2	620	39	13	27		130
D215086		USGS		Geochemistry of rock samples from the National Geochemical Database: U.S. Geological Survey, Reston, VA.	U.S. Geological Survey	USGS		40.2719	-107.892	0.01	65	65	65	UNKNOWN	SEDIMENTARY	UNKNOWN	UNKNOWN	CLAYSTONE		58.2	0.68	15					0.07	2	4.94	0.4	2.2	0.1								25	1.5	590	40	15	48		120
D215088		USGS		Geochemistry of rock samples from the National Geochemical Database: U.S. Geological Survey, Reston, VA.	U.S. Geological Survey	USGS		38.8806	-111.235	0.01	65	65	65	UNKNOWN	SEDIMENTARY	UNKNOWN	UNKNOWN	CLAYSTONE		52.5	0.5	12.6						2.8	9.27	0.9	2.77	0.3								23	2.3	270	26	8.6	34		110
D215090		USGS		Geochemistry of rock samples from the National Geochemical Database: U.S. Geological Survey, Reston, VA.	U.S. Geological Survey	USGS		42.0367	-107.074	0.01	65	65	65	UNKNOWN	SEDIMENTARY	UNKNOWN	UNKNOWN	CLAYSTONE		73.7	0.55	11.8						0.57	0.22		1.65									17	0.38	23	17	12	19		79
D215091		USGS		Geochemistry of rock samples from the National Geochemical Database: U.S. Geological Survey, Reston, VA.	U.S. Geological Survey	USGS		38.84	-111.223	0.01	65	65	65	UNKNOWN	SEDIMENTARY	UNKNOWN	UNKNOWN	CLAYSTONE		59.6	0.78	21.8						1.3	0.44		2.47									22	1.5	39	26	8.7	39		140
D215095		USGS		Geochemistry of rock samples from the National Geochemical Database: U.S. Geological Survey, Reston, VA.	U.S. Geological Survey	USGS		36.1228	-107.829	0.01	65	65	65	UNKNOWN	SEDIMENTARY	UNKNOWN	UNKNOWN	CLAYSTONE		67.1	0.63	15.9						1.4	0.4	1.2	2.33									23	1.9	42	12	4.1	47		62
D215098		USGS		Geochemistry of rock samples from the National Geochemical Database: U.S. Geological Survey, Reston, VA.	U.S. Geological Survey	USGS		40.2561	-107.866	0.01	65	65	65	UNKNOWN	SEDIMENTARY	UNKNOWN	UNKNOWN	CLAYSTONE		58.4	0.68	15.8						0.7	0.36		2.01	0.1								14	0.43	15	24	13	38		74
D215132		USGS		Geochemistry of rock samples from the National Geochemical Database: U.S. Geological Survey, Reston, VA.	U.S. Geological Survey	USGS		40.2561	-107.866	0.01	65	65	65	UNKNOWN	SEDIMENTARY	UNKNOWN	UNKNOWN	CLAYSTONE		12.2	0.16	4					0.62	3.5	5.61		0.52	0.2								3.1	7.2	890	2.9	1.5	9.9		54
D215099		USGS		Geochemistry of rock samples from the National Geochemical Database: U.S. Geological Survey, Reston, VA.	U.S. Geological Survey	USGS		38.8806	-111.235	0.01	65	65	65	UNKNOWN	SEDIMENTARY	UNKNOWN	UNKNOWN	CLAYSTONE		55.8	0.5	12.3						3	7.97	0.9	2.83	0.2								16	1.2	170	17	6.8	23	15	99
D215105		USGS		Geochemistry of rock samples from the National Geochemical Database: U.S. Geological Survey, Reston, VA.	U.S. Geological Survey	USGS		42.0253	-107.072	0.01	65	65	65	UNKNOWN	SEDIMENTARY	UNKNOWN	UNKNOWN	CLAYSTONE		62.7	0.68	16.7					0.05	1.7	1.26	0.7	2.69	0.2								20	1.7	360	26	12	28		130
D215111		USGS		Geochemistry of rock samples from the National Geochemical Database: U.S. Geological Survey, Reston, VA.	U.S. Geological Survey	USGS		36.1547	-107.901	0.01	65	65	65	UNKNOWN	SEDIMENTARY	UNKNOWN	UNKNOWN	CLAYSTONE		48.8	0.56	15.9						0.65	1.6	1.2	1.69									12	0.67	23	5.5	4.6	23		34
D215122		USGS		Geochemistry of rock samples from the National Geochemical Database: U.S. Geological Survey, Reston, VA.	U.S. Geological Survey	USGS		40.2719	-107.892	0.01	65	65	65	UNKNOWN	SEDIMENTARY	UNKNOWN	UNKNOWN	CLAYSTONE		60.2	0.68	15.6					0.04	2	3.81	0.6	2.34	0.2								23	1.2	280	23	12	39		130
D215123		USGS		Geochemistry of rock samples from the National Geochemical Database: U.S. Geological Survey, Reston, VA.	U.S. Geological Survey	USGS		36.1547	-107.901	0.01	65	65	65	UNKNOWN	SEDIMENTARY	UNKNOWN	UNKNOWN	CLAYSTONE		59.3	0.65	16.1					0.03	1.5	4.09	1.2	3.65	0.1								24	2.2	280	21	9	35		82
D215128		USGS		Geochemistry of rock samples from the National Geochemical Database: U.S. Geological Survey, Reston, VA.	U.S. Geological Survey	USGS		38.8806	-111.235	0.01	65	65	65	UNKNOWN	SEDIMENTARY	UNKNOWN	UNKNOWN	CLAYSTONE		52.2	0.5	12.4						3	9.15	0.7	2.77	0.2								21	1.2	220	18	6.4	30		130
D215131		USGS		Geochemistry of rock samples from the National Geochemical Database: U.S. Geological Survey, Reston, VA.	U.S. Geological Survey	USGS		38.8806	-111.235	0.01	65	65	65	UNKNOWN	SEDIMENTARY	UNKNOWN	UNKNOWN	CLAYSTONE		55.3	0.44	10.5						3.2	9.36	0.9	2.47	0.2								24	1.7	220	22	6.4	28		91
D215136		USGS		Geochemistry of rock samples from the National Geochemical Database: U.S. Geological Survey, Reston, VA.	U.S. Geological Survey	USGS		36.1228	-107.829	0.01	65	65	65	UNKNOWN	SEDIMENTARY	UNKNOWN	UNKNOWN	CLAYSTONE		64.5	0.67	16.6						1.4	0.51	1.7	3.41									33	4	170	57	42	39		84
D215139		USGS		Geochemistry of rock samples from the National Geochemical Database: U.S. Geological Survey, Reston, VA.	U.S. Geological Survey	USGS		42.0253	-107.072	0.01	65	65	65	UNKNOWN	SEDIMENTARY	UNKNOWN	UNKNOWN	CLAYSTONE		60.1	0.55	12.2					0.06	0.78	0.24	0.4	1.83									21	0.95	320	21	9.7	22		51
D215140		USGS		Geochemistry of rock samples from the National Geochemical Database: U.S. Geological Survey, Reston, VA.	U.S. Geological Survey	USGS		38.8806	-111.235	0.01	65	65	65	UNKNOWN	SEDIMENTARY	UNKNOWN	UNKNOWN	CLAYSTONE		50.4	0.46	11.4					0.03	2.7	11.2	0.3	2.23	0.2								22	2	340	25	8.4	33		120
D215147		USGS		Geochemistry of rock samples from the National Geochemical Database: U.S. Geological Survey, Reston, VA.	U.S. Geological Survey	USGS		36.1547	-107.901	0.01	65	65	65	UNKNOWN	SEDIMENTARY	UNKNOWN	UNKNOWN	CLAYSTONE		60.8	0.63	15.8						1.2	0.66	1.4	2.34									29	2.7	110	14	5.8	40		99
D215148		USGS		Geochemistry of rock samples from the National Geochemical Database: U.S. Geological Survey, Reston, VA.	U.S. Geological Survey	USGS		38.8806	-111.235	0.01	65	65	65	UNKNOWN	SEDIMENTARY	UNKNOWN	UNKNOWN	CLAYSTONE		53.1	0.49	11.9						3	9.5	0.8	2.78	0.2								23	2.1	290	28	8.8	27		110
D215150		USGS		Geochemistry of rock samples from the National Geochemical Database: U.S. Geological Survey, Reston, VA.	U.S. Geological Survey	USGS		42.0367	-107.074	0.01	65	65	65	UNKNOWN	SEDIMENTARY	UNKNOWN	UNKNOWN	CLAYSTONE		61.2	0.66	17.5						0.88	0.28		2.69									27	0.93	38	23	9.4	30		100
D215151		USGS		Geochemistry of rock samples from the National Geochemical Database: U.S. Geological Survey, Reston, VA.	U.S. Geological Survey	USGS		38.105	-110.957	0.01	65	65	65	UNKNOWN	SEDIMENTARY	UNKNOWN	UNKNOWN	CLAYSTONE		62.4	0.56	10.7					0.07	2.9	4.93		1.76	0.1								25	2	470	28	7.6	39		98
D215152		USGS		Geochemistry of rock samples from the National Geochemical Database: U.S. Geological Survey, Reston, VA.	U.S. Geological Survey	USGS		40.2561	-107.866	0.01	65	65	65	UNKNOWN	SEDIMENTARY	UNKNOWN	UNKNOWN	CLAYSTONE		56.7	0.61	12.9					0.07	2	3.99	0.4	2.1	0.1								23	1.7	490	35	11	50		84
D215154		USGS		Geochemistry of rock samples from the National Geochemical Database: U.S. Geological Survey, Reston, VA.	U.S. Geological Survey	USGS		36.1228	-107.829	0.01	65	65	65	UNKNOWN	SEDIMENTARY	UNKNOWN	UNKNOWN	CLAYSTONE		64.8	0.64	15.4						1.3	0.81	1.5	2.9										5.1	200	62	68	50		89
D215157		USGS		Geochemistry of rock samples from the National Geochemical Database: U.S. Geological Survey, Reston, VA.	U.S. Geological Survey	USGS		42.0253	-107.072	0.01	65	65	65	UNKNOWN	SEDIMENTARY	UNKNOWN	UNKNOWN	CLAYSTONE		64.9	0.69	16.7					0.03	1.2	0.61		2.63	0.2								36	1.7	380	43	14	39		120
D215158		USGS		Geochemistry of rock samples from the National Geochemical Database: U.S. Geological Survey, Reston, VA.	U.S. Geological Survey	USGS		38.84	-111.223	0.01	65	65	65	UNKNOWN	SEDIMENTARY	UNKNOWN	UNKNOWN	CLAYSTONE		59.6	0.64	13.5					0.17	1.8	1.07		2.03	0.1								31	7.8	1300	52	24	38		200
D215159		USGS		Geochemistry of rock samples from the National Geochemical Database: U.S. Geological Survey, Reston, VA.	U.S. Geological Survey	USGS		36.1547	-107.901	0.01	65	65	65	UNKNOWN	SEDIMENTARY	UNKNOWN	UNKNOWN	CLAYSTONE		65.1	0.69	15.8						1.4	0.67	1.5	2.97									36	4.7	220	25	9.4	39		100
D215160		USGS		Geochemistry of rock samples from the National Geochemical Database: U.S. Geological Survey, Reston, VA.	U.S. Geological Survey	USGS		38.8806	-111.235	0.01	65	65	65	UNKNOWN	SEDIMENTARY	UNKNOWN	UNKNOWN	CLAYSTONE		54.4	0.44	10.9						3.2	9.36	0.8	2.55	0.3								29	2.5	250	33	8.7	26		100
D215164		USGS		Geochemistry of rock samples from the National Geochemical Database: U.S. Geological Survey, Reston, VA.	U.S. Geological Survey	USGS		42.0253	-107.072	0.01	65	65	65	UNKNOWN	SEDIMENTARY	UNKNOWN	UNKNOWN	CLAYSTONE		57.4	0.65	17.3					0.14	2	1.31		2.52	0.2								29	4.3	910	41	5.8	38		130
D215166		USGS		Geochemistry of rock samples from the National Geochemical Database: U.S. Geological Survey, Reston, VA.	U.S. Geological Survey	USGS		40.2719	-107.892	0.01	65	65	65	UNKNOWN	SEDIMENTARY	UNKNOWN	UNKNOWN	CLAYSTONE		54.4	0.58	18.8						1.1	0.48		2.49	0.1								28	1.4	63	62	15	64		110
D215168		USGS		Geochemistry of rock samples from the National Geochemical Database: U.S. Geological Survey, Reston, VA.	U.S. Geological Survey	USGS		38.105	-110.957	0.01	65	65	65	UNKNOWN	SEDIMENTARY	UNKNOWN	UNKNOWN	CLAYSTONE		63.6	0.64	12.2					0.1	2.6	2.73		1.57	0.1								30	3.7	700	34	11	38		100
D215170		USGS		Geochemistry of rock samples from the National Geochemical Database: U.S. Geological Survey, Reston, VA.	U.S. Geological Survey	USGS		42.0253	-107.072	0.01	65	65	65	UNKNOWN	SEDIMENTARY	UNKNOWN	UNKNOWN	CLAYSTONE		62.2	0.66	16.1					0.13	1.4	0.95		2.42	0.3								24	3	810	31	7.6	27		120
D215171		USGS		Geochemistry of rock samples from the National Geochemical Database: U.S. Geological Survey, Reston, VA.	U.S. Geological Survey	USGS		42.0253	-107.072	0.01	65	65	65	UNKNOWN	SEDIMENTARY	UNKNOWN	UNKNOWN	CLAYSTONE		61.2	0.68	16.5					0.19	1.3	0.66		2.68	0.2								25	2.9	1200	45	13	35		140
D215177		USGS		Geochemistry of rock samples from the National Geochemical Database: U.S. Geological Survey, Reston, VA.	U.S. Geological Survey	USGS		42.0253	-107.072	0.01	65	65	65	UNKNOWN	SEDIMENTARY	UNKNOWN	UNKNOWN	CLAYSTONE		61.9	0.66	16.5					0.06	1.7	1.24	0.6	2.67	0.2								26	2.4	470	41	16	28		130
D215178		USGS		Geochemistry of rock samples from the National Geochemical Database: U.S. Geological Survey, Reston, VA.	U.S. Geological Survey	USGS		42.0367	-107.074	0.01	65	65	65	UNKNOWN	SEDIMENTARY	UNKNOWN	UNKNOWN	CLAYSTONE		64.9	0.63	12.6						0.67	0.21		2.07									25	0.75	43	19	8.2	19		99
D215181		USGS		Geochemistry of rock samples from the National Geochemical Database: U.S. Geological Survey, Reston, VA.	U.S. Geological Survey	USGS		42.0253	-107.072	0.01	65	65	65	UNKNOWN	SEDIMENTARY	UNKNOWN	UNKNOWN	CLAYSTONE		63	0.64	17.9					0.04	1.3	0.6		2.92	0.2								26	1.8	370	33	12	29		130
D215189		USGS		Geochemistry of rock samples from the National Geochemical Database: U.S. Geological Survey, Reston, VA.	U.S. Geological Survey	USGS		38.1017	-110.938	0.01	65	65	65	UNKNOWN	SEDIMENTARY	UNKNOWN	UNKNOWN	CLAYSTONE		72.4	0.72	15.3						0.89	0.39		0.53									30	1	28	26	5.5	9		52
D215194		USGS		Geochemistry of rock samples from the National Geochemical Database: U.S. Geological Survey, Reston, VA.	U.S. Geological Survey	USGS		42.0253	-107.072	0.01	65	65	65	UNKNOWN	SEDIMENTARY	UNKNOWN	UNKNOWN	CLAYSTONE		64.5	0.64	13.5					0.1	1.8	1.29		2.32	0.2								26	2.6	570	31	12	29		110
D215196		USGS		Geochemistry of rock samples from the National Geochemical Database: U.S. Geological Survey, Reston, VA.	U.S. Geological Survey	USGS		38.8806	-111.235	0.01	65	65	65	UNKNOWN	SEDIMENTARY	UNKNOWN	UNKNOWN	CLAYSTONE		55.8	0.44	10.6						3.2	9.41	0.8	2.49	0.2								23	1.9	240	23	8.6	23		110
D215197		USGS		Geochemistry of rock samples from the National Geochemical Database: U.S. Geological Survey, Reston, VA.	U.S. Geological Survey	USGS		38.8806	-111.235	0.01	65	65	65	UNKNOWN	SEDIMENTARY	UNKNOWN	UNKNOWN	CLAYSTONE		51.6	0.5	12.4						2.8	10	0.5	2.68	0.2								25	2.6	300	31	9	33		140
D215201		USGS		Geochemistry of rock samples from the National Geochemical Database: U.S. Geological Survey, Reston, VA.	U.S. Geological Survey	USGS		40.2561	-107.866	0.01	65	65	65	UNKNOWN	SEDIMENTARY	UNKNOWN	UNKNOWN	CLAYSTONE		57.1	0.61	14.4					0.08	2.1	5.32	0.4	2.29	0.2								26	1.9	610	37	13	38		120
D215204		USGS		Geochemistry of rock samples from the National Geochemical Database: U.S. Geological Survey, Reston, VA.	U.S. Geological Survey	USGS		38.8806	-111.235	0.01	65	65	65	UNKNOWN	SEDIMENTARY	UNKNOWN	UNKNOWN	CLAYSTONE		54.1	0.46	11.4						3.2	9.76	0.8	2.6	0.3								22	2.4	200	29		24		110
D215209		USGS		Geochemistry of rock samples from the National Geochemical Database: U.S. Geological Survey, Reston, VA.	U.S. Geological Survey	USGS		40.2561	-107.866	0.01	65	65	65	UNKNOWN	SEDIMENTARY	UNKNOWN	UNKNOWN	CLAYSTONE		59.5	0.64	18.3						0.95	0.44		2.67	0.2								28	1.5	57	51	18	52		160
D215210		USGS		Geochemistry of rock samples from the National Geochemical Database: U.S. Geological Survey, Reston, VA.	U.S. Geological Survey	USGS		40.2719	-107.892	0.01	65	65	65	UNKNOWN	SEDIMENTARY	UNKNOWN	UNKNOWN	CLAYSTONE		58.6	0.68	14.9					0.08	2	5.01	0.4	2.21	0.1								24	1.7	550	44	17	49		140
D215212		USGS		Geochemistry of rock samples from the National Geochemical Database: U.S. Geological Survey, Reston, VA.	U.S. Geological Survey	USGS		38.105	-110.957	0.01	65	65	65	UNKNOWN	SEDIMENTARY	UNKNOWN	UNKNOWN	CLAYSTONE		58.9	0.81	17.2						2.5	1.84		2.44	0.2								24	2.4	230	31	12	50		140
D215214		USGS		Geochemistry of rock samples from the National Geochemical Database: U.S. Geological Survey, Reston, VA.	U.S. Geological Survey	USGS		36.1228	-107.829	0.01	65	65	65	UNKNOWN	SEDIMENTARY	UNKNOWN	UNKNOWN	CLAYSTONE		62.4	0.72	17.3						1.4	0.94	1.3	3.32	0.2								25	2.9	220	29	17	46		94
D215217		USGS		Geochemistry of rock samples from the National Geochemical Database: U.S. Geological Survey, Reston, VA.	U.S. Geological Survey	USGS		42.0253	-107.072	0.01	65	65	65	UNKNOWN	SEDIMENTARY	UNKNOWN	UNKNOWN	CLAYSTONE		67.2	0.66	14.2					0.03	1.2	0.54	0.5	2.43	0.2								23	2.2	280	30	13	24		130
D215218		USGS		Geochemistry of rock samples from the National Geochemical Database: U.S. Geological Survey, Reston, VA.	U.S. Geological Survey	USGS		36.1547	-107.901	0.01	65	65	65	UNKNOWN	SEDIMENTARY	UNKNOWN	UNKNOWN	CLAYSTONE		66	0.69	15.7						1.1	0.75	1.3	4.62	0.2								23	2.4	180	20	8	38		110
D215220		USGS		Geochemistry of rock samples from the National Geochemical Database: U.S. Geological Survey, Reston, VA.	U.S. Geological Survey	USGS		38.105	-110.957	0.01	65	65	65	UNKNOWN	SEDIMENTARY	UNKNOWN	UNKNOWN	CLAYSTONE		58.7	0.79	17.2						2.6	1.82		2.44	0.2								22	2.1	220	30	12	48		120
D215229		USGS		Geochemistry of rock samples from the National Geochemical Database: U.S. Geological Survey, Reston, VA.	U.S. Geological Survey	USGS		36.1547	-107.901	0.01	65	65	65	UNKNOWN	SEDIMENTARY	UNKNOWN	UNKNOWN	CLAYSTONE		63.2	0.65	16.4						1.2	2.21	1	2.36	0.1								22	1.6	180	21	10	36		76
D215230		USGS		Geochemistry of rock samples from the National Geochemical Database: U.S. Geological Survey, Reston, VA.	U.S. Geological Survey	USGS		42.0253	-107.072	0.01	65	65	65	UNKNOWN	SEDIMENTARY	UNKNOWN	UNKNOWN	CLAYSTONE		38.4	0.41	11.4						0.74	0.24		1.63									13	1.5	36	17	6.4	23		65
D215233		USGS		Geochemistry of rock samples from the National Geochemical Database: U.S. Geological Survey, Reston, VA.	U.S. Geological Survey	USGS		38.105	-110.957	0.01	65	65	65	UNKNOWN	SEDIMENTARY	UNKNOWN	UNKNOWN	CLAYSTONE		63	0.55	10.6					0.07	2.8	4.96		1.76	0.1								25	2.1	470	31	10	35		120
D215234		USGS		Geochemistry of rock samples from the National Geochemical Database: U.S. Geological Survey, Reston, VA.	U.S. Geological Survey	USGS		42.0253	-107.072	0.01	65	65	65	UNKNOWN	SEDIMENTARY	UNKNOWN	UNKNOWN	CLAYSTONE		60.5	0.64	16.8					0.16	1.9	1.45	0.6	2.64	0.2								23	2	960	38	12	29		130
D215240		USGS		Geochemistry of rock samples from the National Geochemical Database: U.S. Geological Survey, Reston, VA.	U.S. Geological Survey	USGS		38.8806	-111.235	0.01	65	65	65	UNKNOWN	SEDIMENTARY	UNKNOWN	UNKNOWN	CLAYSTONE		57	0.45	11.6						2.5	7.92	0.6	2.6	0.2								22	1.6	210	22	7	24		100
D215246		USGS		Geochemistry of rock samples from the National Geochemical Database: U.S. Geological Survey, Reston, VA.	U.S. Geological Survey	USGS		36.1228	-107.829	0.01	65	65	65	UNKNOWN	SEDIMENTARY	UNKNOWN	UNKNOWN	CLAYSTONE		67.1	0.63	16						1.3	0.41	1.2	2.36									31	2.7	81	14	4.1	49		59
D215247		USGS		Geochemistry of rock samples from the National Geochemical Database: U.S. Geological Survey, Reston, VA.	U.S. Geological Survey	USGS		40.2719	-107.892	0.01	65	65	65	UNKNOWN	SEDIMENTARY	UNKNOWN	UNKNOWN	CLAYSTONE		54.6	0.58	19.1						1.1	0.45		2.5	0.1								20	1	26	41	11	53		78
D215253		USGS		Geochemistry of rock samples from the National Geochemical Database: U.S. Geological Survey, Reston, VA.	U.S. Geological Survey	USGS		42.0253	-107.072	0.01	65	65	65	UNKNOWN	SEDIMENTARY	UNKNOWN	UNKNOWN	CLAYSTONE		65.8	0.59	14.3					0.19	1.4	0.81	0.6	2.45	0.2								34	2.9	1500	41	13	27		130
D215254		USGS		Geochemistry of rock samples from the National Geochemical Database: U.S. Geological Survey, Reston, VA.	U.S. Geological Survey	USGS		35.8969	-107.412	0.01	65	65	65	UNKNOWN	SEDIMENTARY	UNKNOWN	UNKNOWN	CLAYSTONE		66.2	0.7	16.2						1.3	0.6	1.4	2.56	0.1								36	4.4	190	29	18	37		130
D215255		USGS		Geochemistry of rock samples from the National Geochemical Database: U.S. Geological Survey, Reston, VA.	U.S. Geological Survey	USGS		42.0367	-107.074	0.01	65	65	65	UNKNOWN	SEDIMENTARY	UNKNOWN	UNKNOWN	CLAYSTONE		73.3	0.55	11.7						0.57	0.22		1.65									30	0.58	58	27	14	26		78
D215261		USGS		Geochemistry of rock samples from the National Geochemical Database: U.S. Geological Survey, Reston, VA.	U.S. Geological Survey	USGS		40.2719	-107.892	0.01	65	65	65	UNKNOWN	SEDIMENTARY	UNKNOWN	UNKNOWN	CLAYSTONE		55.2	0.63	17.5						0.91	0.44	0.4	1.9									25	1	38	15	2.7	39		61
D215264		USGS		Geochemistry of rock samples from the National Geochemical Database: U.S. Geological Survey, Reston, VA.	U.S. Geological Survey	USGS		40.2561	-107.866	0.01	65	65	65	UNKNOWN	SEDIMENTARY	UNKNOWN	UNKNOWN	CLAYSTONE		56.6	0.62	14.2					0.08	2.1	5.34	0.4	2.28	0.2								22	1.3	500	23	10	49		140
D215266		USGS		Geochemistry of rock samples from the National Geochemical Database: U.S. Geological Survey, Reston, VA.	U.S. Geological Survey	USGS		38.105	-110.957	0.01	65	65	65	UNKNOWN	SEDIMENTARY	UNKNOWN	UNKNOWN	CLAYSTONE		60.4	0.69	18.2						1.5	0.72		1.56	0.1								26	1.3	42	25	5.3	30		100
D215268		USGS		Geochemistry of rock samples from the National Geochemical Database: U.S. Geological Survey, Reston, VA.	U.S. Geological Survey	USGS		36.1547	-107.901	0.01	65	65	65	UNKNOWN	SEDIMENTARY	UNKNOWN	UNKNOWN	CLAYSTONE		64.8	0.72	18						0.97	0.43	1.1	2.3									33	2.7	56	54	25	38		76
D215269		USGS		Geochemistry of rock samples from the National Geochemical Database: U.S. Geological Survey, Reston, VA.	U.S. Geological Survey	USGS		40.2561	-107.866	0.01	65	65	65	UNKNOWN	SEDIMENTARY	UNKNOWN	UNKNOWN	CLAYSTONE		11.9	0.15	3.9					0.63	3.3	5.48		0.5	0.2								4.8	14	1700	5.8	1.8	12		73
D215270		USGS		Geochemistry of rock samples from the National Geochemical Database: U.S. Geological Survey, Reston, VA.	U.S. Geological Survey	USGS		38.8806	-111.235	0.01	65	65	65	UNKNOWN	SEDIMENTARY	UNKNOWN	UNKNOWN	CLAYSTONE		52.2	0.49	12.6						3.1	8.6	0.8	2.79	0.2								24	2	270	25	8.5	28		120
D215271		USGS		Geochemistry of rock samples from the National Geochemical Database: U.S. Geological Survey, Reston, VA.	U.S. Geological Survey	USGS		40.2719	-107.892	0.01	65	65	65	UNKNOWN	SEDIMENTARY	UNKNOWN	UNKNOWN	CLAYSTONE		50.5	0.61	14.1						0.92	1.1		1.46									18	1	300	43	15	37		80
D215301		USGS		Geochemistry of rock samples from the National Geochemical Database: U.S. Geological Survey, Reston, VA.	U.S. Geological Survey	USGS		38.84	-111.223	0.01	65	65	65	UNKNOWN	SEDIMENTARY	UNKNOWN	UNKNOWN	CLAYSTONE		74.5	0.53	13.8						0.3	0.17		1.38									29	0.62	31	8.1	2.9	2.6		27
D215275		USGS		Geochemistry of rock samples from the National Geochemical Database: U.S. Geological Survey, Reston, VA.	U.S. Geological Survey	USGS		40.2561	-107.866	0.01	65	65	65	UNKNOWN	SEDIMENTARY	UNKNOWN	UNKNOWN	CLAYSTONE		57.5	0.6	11.2					0.05	2.2	8.64	0.4	2.05	0.2								28	1	440	25	10	47		110
D215276		USGS		Geochemistry of rock samples from the National Geochemical Database: U.S. Geological Survey, Reston, VA.	U.S. Geological Survey	USGS		36.1547	-107.901	0.01	65	65	65	UNKNOWN	SEDIMENTARY	UNKNOWN	UNKNOWN	CLAYSTONE		61.5	0.64	15.9						1.2	0.65	1.4	2.34									33	3.6	82	19	7.3	48		110
D215278		USGS		Geochemistry of rock samples from the National Geochemical Database: U.S. Geological Survey, Reston, VA.	U.S. Geological Survey	USGS		38.105	-110.957	0.01	65	65	65	UNKNOWN	SEDIMENTARY	UNKNOWN	UNKNOWN	CLAYSTONE		66.4	0.64	13.7						0.93	0.44		1.32									33	1.8	50	45	17	36		110
D215285		USGS		Geochemistry of rock samples from the National Geochemical Database: U.S. Geological Survey, Reston, VA.	U.S. Geological Survey	USGS		38.105	-110.957	0.01	65	65	65	UNKNOWN	SEDIMENTARY	UNKNOWN	UNKNOWN	CLAYSTONE		62.8	0.54	10.7						3.3	5.35		1.86	0.1								36	2.9	280	31	6.6	37		110
D215286		USGS		Geochemistry of rock samples from the National Geochemical Database: U.S. Geological Survey, Reston, VA.	U.S. Geological Survey	USGS		40.2719	-107.892	0.01	65	65	65	UNKNOWN	SEDIMENTARY	UNKNOWN	UNKNOWN	CLAYSTONE		59.6	0.67	15.5					0.04	2	3.7	0.5	2.32	0.2								33	2.3	450	47	18	48		150
D215291		USGS		Geochemistry of rock samples from the National Geochemical Database: U.S. Geological Survey, Reston, VA.	U.S. Geological Survey	USGS		40.2719	-107.892	0.01	65	65	65	UNKNOWN	SEDIMENTARY	UNKNOWN	UNKNOWN	CLAYSTONE		63.5	0.67	18.2						0.98	0.55	0.8	2.25									24	1.5	33	19	6.7	51		89
D215292		USGS		Geochemistry of rock samples from the National Geochemical Database: U.S. Geological Survey, Reston, VA.	U.S. Geological Survey	USGS		42.0253	-107.072	0.01	65	65	65	UNKNOWN	SEDIMENTARY	UNKNOWN	UNKNOWN	CLAYSTONE		61.4	0.7	17.4					0.11	1.4	0.69		2.43	0.2								27	2.6	600	43	13	36		140
D215296		USGS		Geochemistry of rock samples from the National Geochemical Database: U.S. Geological Survey, Reston, VA.	U.S. Geological Survey	USGS		40.2719	-107.892	0.01	65	65	65	UNKNOWN	SEDIMENTARY	UNKNOWN	UNKNOWN	CLAYSTONE		61.1	0.65	14.6					0.06	1.9	3	0.2	2.17	0.1								25	2.1	360	29	12	49		130
D215298		USGS		Geochemistry of rock samples from the National Geochemical Database: U.S. Geological Survey, Reston, VA.	U.S. Geological Survey	USGS		42.0253	-107.072	0.01	65	65	65	UNKNOWN	SEDIMENTARY	UNKNOWN	UNKNOWN	CLAYSTONE		62.7	0.69	18.4						1.2	0.34	0.4	2.64	0.1								24	1.8	56	27	11	33		150
D215306		USGS		Geochemistry of rock samples from the National Geochemical Database: U.S. Geological Survey, Reston, VA.	U.S. Geological Survey	USGS		35.8969	-107.412	0.01	65	65	65	UNKNOWN	SEDIMENTARY	UNKNOWN	UNKNOWN	CLAYSTONE		65.5	0.68	16.1						1.3	0.59	1.4	2.54	0.1								29	3.8	88	25	15	38		100
D215311		USGS		Geochemistry of rock samples from the National Geochemical Database: U.S. Geological Survey, Reston, VA.	U.S. Geological Survey	USGS		42.0253	-107.072	0.01	65	65	65	UNKNOWN	SEDIMENTARY	UNKNOWN	UNKNOWN	CLAYSTONE		61.9	0.62	17					0.07	1.6	0.73		2.71	0.1								25	2.2	480	29	13	38		150
D215313		USGS		Geochemistry of rock samples from the National Geochemical Database: U.S. Geological Survey, Reston, VA.	U.S. Geological Survey	USGS		42.0367	-107.074	0.01	65	65	65	UNKNOWN	SEDIMENTARY	UNKNOWN	UNKNOWN	CLAYSTONE		68.7	0.68	15.1						0.65	0.18		2.18									25	0.78	47	25	9.1	22		93
D215316		USGS		Geochemistry of rock samples from the National Geochemical Database: U.S. Geological Survey, Reston, VA.	U.S. Geological Survey	USGS		38.105	-110.957	0.01	65	65	65	UNKNOWN	SEDIMENTARY	UNKNOWN	UNKNOWN	CLAYSTONE		73.5	0.75	14.8						0.69	0.32		0.62									32	0.92	19	22	6.4	19		130
D215318		USGS		Geochemistry of rock samples from the National Geochemical Database: U.S. Geological Survey, Reston, VA.	U.S. Geological Survey	USGS		35.9136	-107.358	0.01	65	65	65	UNKNOWN	SEDIMENTARY	UNKNOWN	UNKNOWN	CLAYSTONE		60.8	0.61	15.4						1.4	0.6	1.4	2.55									29	3.3	85	23	9	36		71
D215319		USGS		Geochemistry of rock samples from the National Geochemical Database: U.S. Geological Survey, Reston, VA.	U.S. Geological Survey	USGS		42.0253	-107.072	0.01	65	65	65	UNKNOWN	SEDIMENTARY	UNKNOWN	UNKNOWN	CLAYSTONE		60.1	0.55	12.2					0.06	0.76	0.25	0.4	1.82									26	1	400	24	12	21		100
D215320		USGS		Geochemistry of rock samples from the National Geochemical Database: U.S. Geological Survey, Reston, VA.	U.S. Geological Survey	USGS		42.0253	-107.072	0.01	65	65	65	UNKNOWN	SEDIMENTARY	UNKNOWN	UNKNOWN	CLAYSTONE		68	0.64	14.3						1	0.33	0.3	2.26	0.1								32	2.7	78	30	13	24		110
D215323		USGS		Geochemistry of rock samples from the National Geochemical Database: U.S. Geological Survey, Reston, VA.	U.S. Geological Survey	USGS		38.84	-111.223	0.01	65	65	65	UNKNOWN	SEDIMENTARY	UNKNOWN	UNKNOWN	CLAYSTONE		64.5	0.81	17.4						0.91	0.37		2.11									30	1.6	36	25	7	38		90
D215328		USGS		Geochemistry of rock samples from the National Geochemical Database: U.S. Geological Survey, Reston, VA.	U.S. Geological Survey	USGS		38.1017	-110.938	0.01	65	65	65	UNKNOWN	SEDIMENTARY	UNKNOWN	UNKNOWN	CLAYSTONE		78.6	0.49	7.93						0.63	0.24		1.59										1.8	48	26	6.9	23		93
D215333		USGS		Geochemistry of rock samples from the National Geochemical Database: U.S. Geological Survey, Reston, VA.	U.S. Geological Survey	USGS		42.0253	-107.072	0.01	65	65	65	UNKNOWN	SEDIMENTARY	UNKNOWN	UNKNOWN	CLAYSTONE		62.7	0.67	16.3					0.14	1.4	0.91		2.43	0.3								22	2.5	820	38	14	33		150
D215334		USGS		Geochemistry of rock samples from the National Geochemical Database: U.S. Geological Survey, Reston, VA.	U.S. Geological Survey	USGS		38.1017	-110.938	0.01	65	65	65	UNKNOWN	SEDIMENTARY	UNKNOWN	UNKNOWN	CLAYSTONE		64.3	0.79	16.8						1.6	0.62		3	0.1								24	1.7	88	24	12	47		120
D215338		USGS		Geochemistry of rock samples from the National Geochemical Database: U.S. Geological Survey, Reston, VA.	U.S. Geological Survey	USGS		35.9136	-107.358	0.01	65	65	65	UNKNOWN	SEDIMENTARY	UNKNOWN	UNKNOWN	CLAYSTONE		65.9	0.74	17.6						1.1	0.43	1.2	2.74									25	2.8	50	19	6.6	35		83
D215339		USGS		Geochemistry of rock samples from the National Geochemical Database: U.S. Geological Survey, Reston, VA.	U.S. Geological Survey	USGS		38.105	-110.957	0.01	65	65	65	UNKNOWN	SEDIMENTARY	UNKNOWN	UNKNOWN	CLAYSTONE		67.7	0.87	18.8						0.77	0.28		1.55									23	0.73	27	17	4.1	27		65
D215457		USGS		Geochemistry of rock samples from the National Geochemical Database: U.S. Geological Survey, Reston, VA.	U.S. Geological Survey	USGS		38.8183	-105.155	0.01	15	15	15	UNKNOWN	SEDIMENTARY	UNKNOWN	UNKNOWN	CLAYSTONE																						31	4.1	410	21	28	40		250
D215458		USGS		Geochemistry of rock samples from the National Geochemical Database: U.S. Geological Survey, Reston, VA.	U.S. Geological Survey	USGS		38.8183	-105.155	0.01	15	15	15	UNKNOWN	SEDIMENTARY	UNKNOWN	UNKNOWN	CLAYSTONE																						29	2.5	280	20	30	55		180
D215912		USGS		Geochemistry of rock samples from the National Geochemical Database: U.S. Geological Survey, Reston, VA.	U.S. Geological Survey	USGS		36.4167	-109	0.01	56	56	56	UNKNOWN	SEDIMENTARY	UNKNOWN	UNKNOWN	CLAYSTONE						13.1		0.67														28	10	560	13	15	24
D216157		USGS		Geochemistry of rock samples from the National Geochemical Database: U.S. Geological Survey, Reston, VA.	U.S. Geological Survey	USGS		39.4417	-112.708	0.01	2	2.5	3	UNKNOWN	SEDIMENTARY	UNKNOWN	UNKNOWN	CLAYSTONE																						23	1.8	420	15	7.3	14
D216159		USGS		Geochemistry of rock samples from the National Geochemical Database: U.S. Geological Survey, Reston, VA.	U.S. Geological Survey	USGS		39.4417	-112.708	0.01	2	2.5	3	UNKNOWN	SEDIMENTARY	UNKNOWN	UNKNOWN	CLAYSTONE																						22	1.9	470	16	7.2	16
D216160		USGS		Geochemistry of rock samples from the National Geochemical Database: U.S. Geological Survey, Reston, VA.	U.S. Geological Survey	USGS		39.4417	-112.708	0.01	2	2.5	3	UNKNOWN	SEDIMENTARY	UNKNOWN	UNKNOWN	CLAYSTONE																						24	2.1	370	15	6.7	17
D216163		USGS		Geochemistry of rock samples from the National Geochemical Database: U.S. Geological Survey, Reston, VA.	U.S. Geological Survey	USGS		39.4417	-112.708	0.01	2	2.5	3	UNKNOWN	SEDIMENTARY	UNKNOWN	UNKNOWN	CLAYSTONE																						17	1.8	440	14	5.6	13
D216164		USGS		Geochemistry of rock samples from the National Geochemical Database: U.S. Geological Survey, Reston, VA.	U.S. Geological Survey	USGS		39.4417	-112.708	0.01	2	2.5	3	UNKNOWN	SEDIMENTARY	UNKNOWN	UNKNOWN	CLAYSTONE																						24	2.4	570	18	8.3	19
D216173		USGS		Geochemistry of rock samples from the National Geochemical Database: U.S. Geological Survey, Reston, VA.	U.S. Geological Survey	USGS		39.4417	-112.708	0.01	2	2.5	3	UNKNOWN	SEDIMENTARY	UNKNOWN	UNKNOWN	CLAYSTONE																						25	3.3	1000	22	13	21
D216178		USGS		Geochemistry of rock samples from the National Geochemical Database: U.S. Geological Survey, Reston, VA.	U.S. Geological Survey	USGS		39.4417	-112.708	0.01	2	2.5	3	UNKNOWN	SEDIMENTARY	UNKNOWN	UNKNOWN	CLAYSTONE																						22	3.1	730	20	11	13
D216181		USGS		Geochemistry of rock samples from the National Geochemical Database: U.S. Geological Survey, Reston, VA.	U.S. Geological Survey	USGS		39.4417	-112.708	0.01	2	2.5	3	UNKNOWN	SEDIMENTARY	UNKNOWN	UNKNOWN	CLAYSTONE																						30	3.7	480	19	11	8.7
D216182		USGS		Geochemistry of rock samples from the National Geochemical Database: U.S. Geological Survey, Reston, VA.	U.S. Geological Survey	USGS		39.4417	-112.708	0.01	2	2.5	3	UNKNOWN	SEDIMENTARY	UNKNOWN	UNKNOWN	CLAYSTONE																						27	3.2	630	21	11	12
D216183		USGS		Geochemistry of rock samples from the National Geochemical Database: U.S. Geological Survey, Reston, VA.	U.S. Geological Survey	USGS		39.4417	-112.708	0.01	2	2.5	3	UNKNOWN	SEDIMENTARY	UNKNOWN	UNKNOWN	CLAYSTONE																						26	3.2	660	18	10	15
D216677		USGS		Geochemistry of rock samples from the National Geochemical Database: U.S. Geological Survey, Reston, VA.	U.S. Geological Survey	USGS		35.6222	-110.147	0.01	8	8	8	UNKNOWN	SEDIMENTARY	UNKNOWN	UNKNOWN	CLAYSTONE																						10		1700	61	49	26
D216752		USGS		Geochemistry of rock samples from the National Geochemical Database: U.S. Geological Survey, Reston, VA.	U.S. Geological Survey	USGS		40.2406	-108.291	0.01	22	22	22	UNKNOWN	SEDIMENTARY	UNKNOWN	UNKNOWN	CLAYSTONE																						34	1.4		18	5	150				1.9
D216756		USGS		Geochemistry of rock samples from the National Geochemical Database: U.S. Geological Survey, Reston, VA.	U.S. Geological Survey	USGS		40.2947	-109.204	0.01	65	65	65	UNKNOWN	SEDIMENTARY	UNKNOWN	UNKNOWN	CLAYSTONE																						38	2.4	290	34	20	16		78		1.4
D217078		USGS		Geochemistry of rock samples from the National Geochemical Database: U.S. Geological Survey, Reston, VA.	U.S. Geological Survey	USGS		38.1117	-110.314	0.01	59	59	59	UNKNOWN	SEDIMENTARY	UNKNOWN	UNKNOWN	CLAYSTONE																						34	0.99		100	68	300		220		1.3
D217177		USGS		Geochemistry of rock samples from the National Geochemical Database: U.S. Geological Survey, Reston, VA.	U.S. Geological Survey	USGS		35.9986	-109.36	0.01	59	59	59	UNKNOWN	SEDIMENTARY	UNKNOWN	UNKNOWN	CLAYSTONE																						16	2	3200	21	14	21
D217178		USGS		Geochemistry of rock samples from the National Geochemical Database: U.S. Geological Survey, Reston, VA.	U.S. Geological Survey	USGS		35.9667	-109.392	0.01	59	59	59	UNKNOWN	SEDIMENTARY	UNKNOWN	UNKNOWN	CLAYSTONE																						28	4	570	29	10	29
D217179		USGS		Geochemistry of rock samples from the National Geochemical Database: U.S. Geological Survey, Reston, VA.	U.S. Geological Survey	USGS		35.9519	-109.365	0.01	59	59	59	UNKNOWN	SEDIMENTARY	UNKNOWN	UNKNOWN	CLAYSTONE																						30	3.4	680	14	8.7	31
D217182		USGS		Geochemistry of rock samples from the National Geochemical Database: U.S. Geological Survey, Reston, VA.	U.S. Geological Survey	USGS		36.9947	-109.847	0.01	59	59	59	UNKNOWN	SEDIMENTARY	UNKNOWN	UNKNOWN	CLAYSTONE																						32	4		18	16	17		55
D217257		USGS		Geochemistry of rock samples from the National Geochemical Database: U.S. Geological Survey, Reston, VA.	U.S. Geological Survey	USGS		37.0739	-111.993	0.01	59	59	59	UNKNOWN	SEDIMENTARY	UNKNOWN	UNKNOWN	CLAYSTONE
D218186		USGS		Geochemistry of rock samples from the National Geochemical Database: U.S. Geological Survey, Reston, VA.	U.S. Geological Survey	USGS		38.5667	-105.25	0.01	65	65	65	UNKNOWN	SEDIMENTARY	UNKNOWN	UNKNOWN	CLAYSTONE																						31	0.41		11	3.1	24				1.9
D218198		USGS		Geochemistry of rock samples from the National Geochemical Database: U.S. Geological Survey, Reston, VA.	U.S. Geological Survey	USGS		38.5	-105.05	0.01	65	65	65	UNKNOWN	SEDIMENTARY	UNKNOWN	UNKNOWN	CLAYSTONE																						29	0.64		23	4.5	32				1.9
D219063		USGS		Geochemistry of rock samples from the National Geochemical Database: U.S. Geological Survey, Reston, VA.	U.S. Geological Survey	USGS		34.25	-106.875	0.01	11	11	11	UNKNOWN	SEDIMENTARY	UNKNOWN	UNKNOWN	CLAYSTONE																							3	200	30	10	50
D219079		USGS		Geochemistry of rock samples from the National Geochemical Database: U.S. Geological Survey, Reston, VA.	U.S. Geological Survey	USGS		43.7139	-105.218	0.01	6	14	22	UNKNOWN	SEDIMENTARY	UNKNOWN	UNKNOWN	CLAYSTONE																						15	0.59	21	17	6.7	27		67
D219082		USGS		Geochemistry of rock samples from the National Geochemical Database: U.S. Geological Survey, Reston, VA.	U.S. Geological Survey	USGS		43.7139	-105.218	0.01	22	22	22	UNKNOWN	SEDIMENTARY	UNKNOWN	UNKNOWN	CLAYSTONE																						19	0.69	20	16	4.3	27		63
D219109		USGS		Geochemistry of rock samples from the National Geochemical Database: U.S. Geological Survey, Reston, VA.	U.S. Geological Survey	USGS		43.7139	-105.218	0.01	22	22	22	UNKNOWN	SEDIMENTARY	UNKNOWN	UNKNOWN	CLAYSTONE																						18	0.71	20	13	4.6	36		55
D219116		USGS		Geochemistry of rock samples from the National Geochemical Database: U.S. Geological Survey, Reston, VA.	U.S. Geological Survey	USGS		43.7139	-105.218	0.01	22	22	22	UNKNOWN	SEDIMENTARY	UNKNOWN	UNKNOWN	CLAYSTONE																						24	0.77	30	17	4.5	27		61
D219151		USGS		Geochemistry of rock samples from the National Geochemical Database: U.S. Geological Survey, Reston, VA.	U.S. Geological Survey	USGS		43.7139	-105.218	0.01	22	22	22	UNKNOWN	SEDIMENTARY	UNKNOWN	UNKNOWN	CLAYSTONE																						28	3.5	83	62	16	170		160		0.76
D219966		USGS		Geochemistry of rock samples from the National Geochemical Database: U.S. Geological Survey, Reston, VA.	U.S. Geological Survey	USGS		39.85	-105.231	0.01	65	65	65	UNKNOWN	SEDIMENTARY	UNKNOWN	UNKNOWN	CLAYSTONE																						39	1	970	25	6.6	18		52		1.4
D220579		USGS		Geochemistry of rock samples from the National Geochemical Database: U.S. Geological Survey, Reston, VA.	U.S. Geological Survey	USGS		61.5	-145.5	0.01	7	7	7	AAS	SEDIMENTARY	UNKNOWN	UNKNOWN	CLAYSTONE
D220579		USGS		Geochemistry of rock samples from the National Geochemical Database: U.S. Geological Survey, Reston, VA.	U.S. Geological Survey	USGS		61.5	-145.5	0.01	7	7	7	ES	SEDIMENTARY	UNKNOWN	UNKNOWN	CLAYSTONE																							7	1000	70	20	100
D222982		USGS		Geochemistry of rock samples from the National Geochemical Database: U.S. Geological Survey, Reston, VA.	U.S. Geological Survey	USGS		35.4728	-110.043	0.01	8	8	8	DNAA	SEDIMENTARY	UNKNOWN	UNKNOWN	CLAYSTONE
D222983		USGS		Geochemistry of rock samples from the National Geochemical Database: U.S. Geological Survey, Reston, VA.	U.S. Geological Survey	USGS		35.4728	-110.043	0.01	8	8	8	DNAA	SEDIMENTARY	UNKNOWN	UNKNOWN	CLAYSTONE
D223029		USGS		Geochemistry of rock samples from the National Geochemical Database: U.S. Geological Survey, Reston, VA.	U.S. Geological Survey	USGS		35.4728	-110.043	0.01	8	8	8	DNAA	SEDIMENTARY	UNKNOWN	UNKNOWN	CLAYSTONE
D223030		USGS		Geochemistry of rock samples from the National Geochemical Database: U.S. Geological Survey, Reston, VA.	U.S. Geological Survey	USGS		35.4728	-110.043	0.01	8	8	8	DNAA	SEDIMENTARY	UNKNOWN	UNKNOWN	CLAYSTONE
D224695		USGS		Geochemistry of rock samples from the National Geochemical Database: U.S. Geological Survey, Reston, VA.	U.S. Geological Survey	USGS		38.75	-112.875	0.01	7	7.5	8	UNKNOWN	SEDIMENTARY	UNKNOWN	UNKNOWN	CLAYSTONE
D224694		USGS		Geochemistry of rock samples from the National Geochemical Database: U.S. Geological Survey, Reston, VA.	U.S. Geological Survey	USGS		38.75	-112.875	0.01	7	7.5	8	ES	SEDIMENTARY	UNKNOWN	UNKNOWN	CLAYSTONE																							2	200	10	5	20
D224694		USGS		Geochemistry of rock samples from the National Geochemical Database: U.S. Geological Survey, Reston, VA.	U.S. Geological Survey	USGS		38.75	-112.875	0.01	7	7.5	8	UNKNOWN	SEDIMENTARY	UNKNOWN	UNKNOWN	CLAYSTONE
D224695		USGS		Geochemistry of rock samples from the National Geochemical Database: U.S. Geological Survey, Reston, VA.	U.S. Geological Survey	USGS		38.75	-112.875	0.01	7	7.5	8	ES	SEDIMENTARY	UNKNOWN	UNKNOWN	CLAYSTONE																							3	500	15	7	30
D224696		USGS		Geochemistry of rock samples from the National Geochemical Database: U.S. Geological Survey, Reston, VA.	U.S. Geological Survey	USGS		38.75	-112.875	0.01	7	7.5	8	ES	SEDIMENTARY	UNKNOWN	UNKNOWN	CLAYSTONE																							2	300	10	5	30
D224696		USGS		Geochemistry of rock samples from the National Geochemical Database: U.S. Geological Survey, Reston, VA.	U.S. Geological Survey	USGS		38.75	-112.875	0.01	7	7.5	8	UNKNOWN	SEDIMENTARY	UNKNOWN	UNKNOWN	CLAYSTONE
D224698		USGS		Geochemistry of rock samples from the National Geochemical Database: U.S. Geological Survey, Reston, VA.	U.S. Geological Survey	USGS		38.625	-112.875	0.01	7	7.5	8	ES	SEDIMENTARY	UNKNOWN	UNKNOWN	CLAYSTONE																						10	2	500	10	5	30
D224698		USGS		Geochemistry of rock samples from the National Geochemical Database: U.S. Geological Survey, Reston, VA.	U.S. Geological Survey	USGS		38.625	-112.875	0.01	7	7.5	8	UNKNOWN	SEDIMENTARY	UNKNOWN	UNKNOWN	CLAYSTONE
D224699		USGS		Geochemistry of rock samples from the National Geochemical Database: U.S. Geological Survey, Reston, VA.	U.S. Geological Survey	USGS		38.625	-112.875	0.01	7	7.5	8	ES	SEDIMENTARY	UNKNOWN	UNKNOWN	CLAYSTONE																						10	3	300	15	7	30
D224699		USGS		Geochemistry of rock samples from the National Geochemical Database: U.S. Geological Survey, Reston, VA.	U.S. Geological Survey	USGS		38.625	-112.875	0.01	7	7.5	8	UNKNOWN	SEDIMENTARY	UNKNOWN	UNKNOWN	CLAYSTONE
D224700		USGS		Geochemistry of rock samples from the National Geochemical Database: U.S. Geological Survey, Reston, VA.	U.S. Geological Survey	USGS		38.625	-112.875	0.01	7	7.5	8	ES	SEDIMENTARY	UNKNOWN	UNKNOWN	CLAYSTONE																						10	1.5	300	15	5	30
D224700		USGS		Geochemistry of rock samples from the National Geochemical Database: U.S. Geological Survey, Reston, VA.	U.S. Geological Survey	USGS		38.625	-112.875	0.01	7	7.5	8	UNKNOWN	SEDIMENTARY	UNKNOWN	UNKNOWN	CLAYSTONE
D224701		USGS		Geochemistry of rock samples from the National Geochemical Database: U.S. Geological Survey, Reston, VA.	U.S. Geological Survey	USGS		38.75	-112.875	0.01	7	7.5	8	ES	SEDIMENTARY	UNKNOWN	UNKNOWN	CLAYSTONE																							2	300	10	5	20
D224701		USGS		Geochemistry of rock samples from the National Geochemical Database: U.S. Geological Survey, Reston, VA.	U.S. Geological Survey	USGS		38.75	-112.875	0.01	7	7.5	8	UNKNOWN	SEDIMENTARY	UNKNOWN	UNKNOWN	CLAYSTONE
D224702		USGS		Geochemistry of rock samples from the National Geochemical Database: U.S. Geological Survey, Reston, VA.	U.S. Geological Survey	USGS		38.75	-112.75	0.01	7	7.5	8	ES	SEDIMENTARY	UNKNOWN	UNKNOWN	CLAYSTONE																						10	2	500	10	5	30
D224702		USGS		Geochemistry of rock samples from the National Geochemical Database: U.S. Geological Survey, Reston, VA.	U.S. Geological Survey	USGS		38.75	-112.75	0.01	7	7.5	8	UNKNOWN	SEDIMENTARY	UNKNOWN	UNKNOWN	CLAYSTONE
D224703		USGS		Geochemistry of rock samples from the National Geochemical Database: U.S. Geological Survey, Reston, VA.	U.S. Geological Survey	USGS		38.75	-112.75	0.01	7	7.5	8	ES	SEDIMENTARY	UNKNOWN	UNKNOWN	CLAYSTONE																						7	1.5	150	10	5	15
D224703		USGS		Geochemistry of rock samples from the National Geochemical Database: U.S. Geological Survey, Reston, VA.	U.S. Geological Survey	USGS		38.75	-112.75	0.01	7	7.5	8	UNKNOWN	SEDIMENTARY	UNKNOWN	UNKNOWN	CLAYSTONE
D224704		USGS		Geochemistry of rock samples from the National Geochemical Database: U.S. Geological Survey, Reston, VA.	U.S. Geological Survey	USGS		38.875	-112.75	0.01	7	7.5	8	ES	SEDIMENTARY	UNKNOWN	UNKNOWN	CLAYSTONE																							2	300	10	5	70
D224704		USGS		Geochemistry of rock samples from the National Geochemical Database: U.S. Geological Survey, Reston, VA.	U.S. Geological Survey	USGS		38.875	-112.75	0.01	7	7.5	8	UNKNOWN	SEDIMENTARY	UNKNOWN	UNKNOWN	CLAYSTONE
D224705		USGS		Geochemistry of rock samples from the National Geochemical Database: U.S. Geological Survey, Reston, VA.	U.S. Geological Survey	USGS		38.875	-112.75	0.01	7	7.5	8	ES	SEDIMENTARY	UNKNOWN	UNKNOWN	CLAYSTONE																							2	300	10	5	30
D224705		USGS		Geochemistry of rock samples from the National Geochemical Database: U.S. Geological Survey, Reston, VA.	U.S. Geological Survey	USGS		38.875	-112.75	0.01	7	7.5	8	UNKNOWN	SEDIMENTARY	UNKNOWN	UNKNOWN	CLAYSTONE
D224707		USGS		Geochemistry of rock samples from the National Geochemical Database: U.S. Geological Survey, Reston, VA.	U.S. Geological Survey	USGS		38.75	-112.75	0.01	7	7.5	8	ES	SEDIMENTARY	UNKNOWN	UNKNOWN	CLAYSTONE																							2	300	10	7	30
D224707		USGS		Geochemistry of rock samples from the National Geochemical Database: U.S. Geological Survey, Reston, VA.	U.S. Geological Survey	USGS		38.75	-112.75	0.01	7	7.5	8	UNKNOWN	SEDIMENTARY	UNKNOWN	UNKNOWN	CLAYSTONE
D224708		USGS		Geochemistry of rock samples from the National Geochemical Database: U.S. Geological Survey, Reston, VA.	U.S. Geological Survey	USGS		38.75	-112.75	0.01	7	7.5	8	ES	SEDIMENTARY	UNKNOWN	UNKNOWN	CLAYSTONE																						10	2	300	15	5	30
D224708		USGS		Geochemistry of rock samples from the National Geochemical Database: U.S. Geological Survey, Reston, VA.	U.S. Geological Survey	USGS		38.75	-112.75	0.01	7	7.5	8	UNKNOWN	SEDIMENTARY	UNKNOWN	UNKNOWN	CLAYSTONE
D224710		USGS		Geochemistry of rock samples from the National Geochemical Database: U.S. Geological Survey, Reston, VA.	U.S. Geological Survey	USGS		38.625	-113.125	0.01	7	7.5	8	ES	SEDIMENTARY	UNKNOWN	UNKNOWN	CLAYSTONE																						10	3	300	20	5	30
D224710		USGS		Geochemistry of rock samples from the National Geochemical Database: U.S. Geological Survey, Reston, VA.	U.S. Geological Survey	USGS		38.625	-113.125	0.01	7	7.5	8	UNKNOWN	SEDIMENTARY	UNKNOWN	UNKNOWN	CLAYSTONE
D225147		USGS		Geochemistry of rock samples from the National Geochemical Database: U.S. Geological Survey, Reston, VA.	U.S. Geological Survey	USGS		38.5333	-105.55	0.01	18	18	18	DNAA	SEDIMENTARY	UNKNOWN	UNKNOWN	CLAYSTONE
D225147		USGS		Geochemistry of rock samples from the National Geochemical Database: U.S. Geological Survey, Reston, VA.	U.S. Geological Survey	USGS		38.5333	-105.55	0.01	18	18	18	ES	SEDIMENTARY	UNKNOWN	UNKNOWN	CLAYSTONE																							2	70	10	5	70
D225786		USGS		Geochemistry of rock samples from the National Geochemical Database: U.S. Geological Survey, Reston, VA.	U.S. Geological Survey	USGS		42.9667	-104.5	0.01	15	15	15	DNAA	SEDIMENTARY	UNKNOWN	UNKNOWN	CLAYSTONE
D225788		USGS		Geochemistry of rock samples from the National Geochemical Database: U.S. Geological Survey, Reston, VA.	U.S. Geological Survey	USGS		42.9667	-104.5	0.01	15	15	15	DNAA	SEDIMENTARY	UNKNOWN	UNKNOWN	CLAYSTONE
D225790		USGS		Geochemistry of rock samples from the National Geochemical Database: U.S. Geological Survey, Reston, VA.	U.S. Geological Survey	USGS		42.9667	-104.5	0.01	15	15	15	DNAA	SEDIMENTARY	UNKNOWN	UNKNOWN	CLAYSTONE
D225843		USGS		Geochemistry of rock samples from the National Geochemical Database: U.S. Geological Survey, Reston, VA.	U.S. Geological Survey	USGS		42.4833	-106.367	0.01	11	13	15	DNAA	SEDIMENTARY	UNKNOWN	UNKNOWN	CLAYSTONE
D225850		USGS		Geochemistry of rock samples from the National Geochemical Database: U.S. Geological Survey, Reston, VA.	U.S. Geological Survey	USGS		42.45	-106.383	0.01	15	15	15	DNAA	SEDIMENTARY	UNKNOWN	UNKNOWN	CLAYSTONE
D225863		USGS		Geochemistry of rock samples from the National Geochemical Database: U.S. Geological Survey, Reston, VA.	U.S. Geological Survey	USGS		42.75	-107.583	0.01	15	15	15	DNAA	SEDIMENTARY	UNKNOWN	UNKNOWN	CLAYSTONE
D229186		USGS		Geochemistry of rock samples from the National Geochemical Database: U.S. Geological Survey, Reston, VA.	U.S. Geological Survey	USGS		34.25	-107	0.01	11	11	11	UNKNOWN	SEDIMENTARY	UNKNOWN	UNKNOWN	CLAYSTONE
D229186		USGS		Geochemistry of rock samples from the National Geochemical Database: U.S. Geological Survey, Reston, VA.	U.S. Geological Survey	USGS		34.25	-107	0.01	11	11	11	XRF	SEDIMENTARY	UNKNOWN	UNKNOWN	CLAYSTONE		52.8	0.71	14.3					0.1	4.4	6.27	1.5	3.76	0.3
D229233		USGS		Geochemistry of rock samples from the National Geochemical Database: U.S. Geological Survey, Reston, VA.	U.S. Geological Survey	USGS		34	-107	0.01	11	11	11	UNKNOWN	SEDIMENTARY	UNKNOWN	UNKNOWN	CLAYSTONE
D229233		USGS		Geochemistry of rock samples from the National Geochemical Database: U.S. Geological Survey, Reston, VA.	U.S. Geological Survey	USGS		34	-107	0.01	11	11	11	XRF	SEDIMENTARY	UNKNOWN	UNKNOWN	CLAYSTONE		50.3	0.56	15					0.07	3.2	7.57	0.8	4.45	0.2
D229234		USGS		Geochemistry of rock samples from the National Geochemical Database: U.S. Geological Survey, Reston, VA.	U.S. Geological Survey	USGS		34	-107	0.01	11	11	11	UNKNOWN	SEDIMENTARY	UNKNOWN	UNKNOWN	CLAYSTONE
D229234		USGS		Geochemistry of rock samples from the National Geochemical Database: U.S. Geological Survey, Reston, VA.	U.S. Geological Survey	USGS		34	-107	0.01	11	11	11	XRF	SEDIMENTARY	UNKNOWN	UNKNOWN	CLAYSTONE		57	0.58	14.4					0.05	3.5	4.95	1	4.63	0.2
D229261		USGS		Geochemistry of rock samples from the National Geochemical Database: U.S. Geological Survey, Reston, VA.	U.S. Geological Survey	USGS		34.25	-107	0.01	11	11	11	UNKNOWN	SEDIMENTARY	UNKNOWN	UNKNOWN	CLAYSTONE
D229261		USGS		Geochemistry of rock samples from the National Geochemical Database: U.S. Geological Survey, Reston, VA.	U.S. Geological Survey	USGS		34.25	-107	0.01	11	11	11	XRF	SEDIMENTARY	UNKNOWN	UNKNOWN	CLAYSTONE		51.5	0.61	15.6					0.08	3.5	4.37	3.3	2.52	0.2
D229265		USGS		Geochemistry of rock samples from the National Geochemical Database: U.S. Geological Survey, Reston, VA.	U.S. Geological Survey	USGS		34	-107	0.01	11	11	11	UNKNOWN	SEDIMENTARY	UNKNOWN	UNKNOWN	CLAYSTONE
D229265		USGS		Geochemistry of rock samples from the National Geochemical Database: U.S. Geological Survey, Reston, VA.	U.S. Geological Survey	USGS		34	-107	0.01	11	11	11	XRF	SEDIMENTARY	UNKNOWN	UNKNOWN	CLAYSTONE		49.9	0.59	16.2					0.06	3	7.12	0.5	3.87	0.2
D229268		USGS		Geochemistry of rock samples from the National Geochemical Database: U.S. Geological Survey, Reston, VA.	U.S. Geological Survey	USGS		34	-107	0.01	11	11	11	UNKNOWN	SEDIMENTARY	UNKNOWN	UNKNOWN	CLAYSTONE
D229268		USGS		Geochemistry of rock samples from the National Geochemical Database: U.S. Geological Survey, Reston, VA.	U.S. Geological Survey	USGS		34	-107	0.01	11	11	11	XRF	SEDIMENTARY	UNKNOWN	UNKNOWN	CLAYSTONE		48.5	0.56	15					0.12	3.1	8.65	0.7	3.27	0.1
D229328		USGS		Geochemistry of rock samples from the National Geochemical Database: U.S. Geological Survey, Reston, VA.	U.S. Geological Survey	USGS		34.25	-107	0.01	11	11	11	DNAA	SEDIMENTARY	UNKNOWN	UNKNOWN	CLAYSTONE
D229328		USGS		Geochemistry of rock samples from the National Geochemical Database: U.S. Geological Survey, Reston, VA.	U.S. Geological Survey	USGS		34.25	-107	0.01	11	11	11	UNKNOWN	SEDIMENTARY	UNKNOWN	UNKNOWN	CLAYSTONE
D229353		USGS		Geochemistry of rock samples from the National Geochemical Database: U.S. Geological Survey, Reston, VA.	U.S. Geological Survey	USGS		34	-107	0.01	11	11	11	DNAA	SEDIMENTARY	UNKNOWN	UNKNOWN	CLAYSTONE
D229354		USGS		Geochemistry of rock samples from the National Geochemical Database: U.S. Geological Survey, Reston, VA.	U.S. Geological Survey	USGS		34	-107	0.01	11	11	11	DNAA	SEDIMENTARY	UNKNOWN	UNKNOWN	CLAYSTONE
D229361		USGS		Geochemistry of rock samples from the National Geochemical Database: U.S. Geological Survey, Reston, VA.	U.S. Geological Survey	USGS		34.2167	-106.633	0.01	11	11	11	DNAA	SEDIMENTARY	UNKNOWN	UNKNOWN	CLAYSTONE
D229361		USGS		Geochemistry of rock samples from the National Geochemical Database: U.S. Geological Survey, Reston, VA.	U.S. Geological Survey	USGS		34.2167	-106.633	0.01	11	11	11	ES	SEDIMENTARY	UNKNOWN	UNKNOWN	CLAYSTONE																							2	300	20	7	20
D229361		USGS		Geochemistry of rock samples from the National Geochemical Database: U.S. Geological Survey, Reston, VA.	U.S. Geological Survey	USGS		34.2167	-106.633	0.01	11	11	11	UNKNOWN	SEDIMENTARY	UNKNOWN	UNKNOWN	CLAYSTONE
D229379		USGS		Geochemistry of rock samples from the National Geochemical Database: U.S. Geological Survey, Reston, VA.	U.S. Geological Survey	USGS		34.2167	-106.633	0.01	11	11	11	DNAA	SEDIMENTARY	UNKNOWN	UNKNOWN	CLAYSTONE
D229379		USGS		Geochemistry of rock samples from the National Geochemical Database: U.S. Geological Survey, Reston, VA.	U.S. Geological Survey	USGS		34.2167	-106.633	0.01	11	11	11	ES	SEDIMENTARY	UNKNOWN	UNKNOWN	CLAYSTONE																							2	300	10	7	15
D229379		USGS		Geochemistry of rock samples from the National Geochemical Database: U.S. Geological Survey, Reston, VA.	U.S. Geological Survey	USGS		34.2167	-106.633	0.01	11	11	11	UNKNOWN	SEDIMENTARY	UNKNOWN	UNKNOWN	CLAYSTONE
D229384		USGS		Geochemistry of rock samples from the National Geochemical Database: U.S. Geological Survey, Reston, VA.	U.S. Geological Survey	USGS		34.2167	-106.633	0.01	11	11	11	ES	SEDIMENTARY	UNKNOWN	UNKNOWN	CLAYSTONE																							5	700	70	20	30
D229384		USGS		Geochemistry of rock samples from the National Geochemical Database: U.S. Geological Survey, Reston, VA.	U.S. Geological Survey	USGS		34.2167	-106.633	0.01	11	11	11	UNKNOWN	SEDIMENTARY	UNKNOWN	UNKNOWN	CLAYSTONE
D229391		USGS		Geochemistry of rock samples from the National Geochemical Database: U.S. Geological Survey, Reston, VA.	U.S. Geological Survey	USGS		34.3167	-107.05	0.01	11	11	11	DNAA	SEDIMENTARY	UNKNOWN	UNKNOWN	CLAYSTONE
D229391		USGS		Geochemistry of rock samples from the National Geochemical Database: U.S. Geological Survey, Reston, VA.	U.S. Geological Survey	USGS		34.3167	-107.05	0.01	11	11	11	ES	SEDIMENTARY	UNKNOWN	UNKNOWN	CLAYSTONE																							5	300	150	30	1500				1
D229391		USGS		Geochemistry of rock samples from the National Geochemical Database: U.S. Geological Survey, Reston, VA.	U.S. Geological Survey	USGS		34.3167	-107.05	0.01	11	11	11	UNKNOWN	SEDIMENTARY	UNKNOWN	UNKNOWN	CLAYSTONE
D229395		USGS		Geochemistry of rock samples from the National Geochemical Database: U.S. Geological Survey, Reston, VA.	U.S. Geological Survey	USGS		34.3167	-107.05	0.01	11	11	11	ES	SEDIMENTARY	UNKNOWN	UNKNOWN	CLAYSTONE																							5	500	50	15	150
D229395		USGS		Geochemistry of rock samples from the National Geochemical Database: U.S. Geological Survey, Reston, VA.	U.S. Geological Survey	USGS		34.3167	-107.05	0.01	11	11	11	UNKNOWN	SEDIMENTARY	UNKNOWN	UNKNOWN	CLAYSTONE
D229406		USGS		Geochemistry of rock samples from the National Geochemical Database: U.S. Geological Survey, Reston, VA.	U.S. Geological Survey	USGS		34.3167	-107.05	0.01	11	11	11	ES	SEDIMENTARY	UNKNOWN	UNKNOWN	CLAYSTONE																							3	200	50	10	20
D229406		USGS		Geochemistry of rock samples from the National Geochemical Database: U.S. Geological Survey, Reston, VA.	U.S. Geological Survey	USGS		34.3167	-107.05	0.01	11	11	11	UNKNOWN	SEDIMENTARY	UNKNOWN	UNKNOWN	CLAYSTONE
D229409		USGS		Geochemistry of rock samples from the National Geochemical Database: U.S. Geological Survey, Reston, VA.	U.S. Geological Survey	USGS		34.3167	-107.05	0.01	11	11	11	DNAA	SEDIMENTARY	UNKNOWN	UNKNOWN	CLAYSTONE
D229409		USGS		Geochemistry of rock samples from the National Geochemical Database: U.S. Geological Survey, Reston, VA.	U.S. Geological Survey	USGS		34.3167	-107.05	0.01	11	11	11	ES	SEDIMENTARY	UNKNOWN	UNKNOWN	CLAYSTONE																							2	700	50	15	30
D229409		USGS		Geochemistry of rock samples from the National Geochemical Database: U.S. Geological Survey, Reston, VA.	U.S. Geological Survey	USGS		34.3167	-107.05	0.01	11	11	11	UNKNOWN	SEDIMENTARY	UNKNOWN	UNKNOWN	CLAYSTONE
D229410		USGS		Geochemistry of rock samples from the National Geochemical Database: U.S. Geological Survey, Reston, VA.	U.S. Geological Survey	USGS		34.3167	-107.05	0.01	11	11	11	ES	SEDIMENTARY	UNKNOWN	UNKNOWN	CLAYSTONE																							5	500	20	20	200
D229410		USGS		Geochemistry of rock samples from the National Geochemical Database: U.S. Geological Survey, Reston, VA.	U.S. Geological Survey	USGS		34.3167	-107.05	0.01	11	11	11	UNKNOWN	SEDIMENTARY	UNKNOWN	UNKNOWN	CLAYSTONE
D230904		USGS		Geochemistry of rock samples from the National Geochemical Database: U.S. Geological Survey, Reston, VA.	U.S. Geological Survey	USGS		35.5	-108.25	0.01	56	56	56	DNAA	SEDIMENTARY	UNKNOWN	UNKNOWN	CLAYSTONE
D230904		USGS		Geochemistry of rock samples from the National Geochemical Database: U.S. Geological Survey, Reston, VA.	U.S. Geological Survey	USGS		35.5	-108.25	0.01	56	56	56	ES	SEDIMENTARY	UNKNOWN	UNKNOWN	CLAYSTONE																							7	150	20	15	20
D234237		USGS		Geochemistry of rock samples from the National Geochemical Database: U.S. Geological Survey, Reston, VA.	U.S. Geological Survey	USGS		43.5006	-110.936	0.01	71	71	71	ES	SEDIMENTARY	UNKNOWN	UNKNOWN	CLAYSTONE																							1.5	10	100		200	500	3000		30
D234240		USGS		Geochemistry of rock samples from the National Geochemical Database: U.S. Geological Survey, Reston, VA.	U.S. Geological Survey	USGS		43.5006	-110.936	0.01	71	71	71	ES	SEDIMENTARY	UNKNOWN	UNKNOWN	CLAYSTONE																							1	20	70		100	150	2000		15
D239867		USGS		Geochemistry of rock samples from the National Geochemical Database: U.S. Geological Survey, Reston, VA.	U.S. Geological Survey	USGS		48.2558	-103.689	0.01	22	22	22	ICPAES	SEDIMENTARY	UNKNOWN	UNKNOWN	CLAYSTONE																							2.2	220	18	20	21		80
D239867		USGS		Geochemistry of rock samples from the National Geochemical Database: U.S. Geological Survey, Reston, VA.	U.S. Geological Survey	USGS		48.2558	-103.689	0.01	22	22	22	XRF	SEDIMENTARY	UNKNOWN	UNKNOWN	CLAYSTONE		54.8	0.56	11.9						4.53	7.53	0.48	2.75	0.15
D239869		USGS		Geochemistry of rock samples from the National Geochemical Database: U.S. Geological Survey, Reston, VA.	U.S. Geological Survey	USGS		48.2486	-103.517	0.01	22	22	22	ICPAES	SEDIMENTARY	UNKNOWN	UNKNOWN	CLAYSTONE																							3.8	640	90	25	50		130
D239869		USGS		Geochemistry of rock samples from the National Geochemical Database: U.S. Geological Survey, Reston, VA.	U.S. Geological Survey	USGS		48.2486	-103.517	0.01	22	22	22	XRF	SEDIMENTARY	UNKNOWN	UNKNOWN	CLAYSTONE		58.2	0.73	16.5					0.08	2.98	2.29	1.39	3.09	0.18
D239870		USGS		Geochemistry of rock samples from the National Geochemical Database: U.S. Geological Survey, Reston, VA.	U.S. Geological Survey	USGS		48.1981	-103.798	0.01	22	22	22	ICPAES	SEDIMENTARY	UNKNOWN	UNKNOWN	CLAYSTONE																							3.2	440	43	19	47		110
D239870		USGS		Geochemistry of rock samples from the National Geochemical Database: U.S. Geological Survey, Reston, VA.	U.S. Geological Survey	USGS		48.1981	-103.798	0.01	22	22	22	XRF	SEDIMENTARY	UNKNOWN	UNKNOWN	CLAYSTONE		61.3	0.65	13.5					0.05	2.92	3.66	1.57	2.24	0.18
D239872		USGS		Geochemistry of rock samples from the National Geochemical Database: U.S. Geological Survey, Reston, VA.	U.S. Geological Survey	USGS		48.1697	-103.516	0.01	22	22	22	ICPAES	SEDIMENTARY	UNKNOWN	UNKNOWN	CLAYSTONE																							2.7	610	25	25	33		90
D239872		USGS		Geochemistry of rock samples from the National Geochemical Database: U.S. Geological Survey, Reston, VA.	U.S. Geological Survey	USGS		48.1697	-103.516	0.01	22	22	22	XRF	SEDIMENTARY	UNKNOWN	UNKNOWN	CLAYSTONE		51	0.5	11.5					0.07	4.22	9.36	0.6	2.58	0.15
D239873		USGS		Geochemistry of rock samples from the National Geochemical Database: U.S. Geological Survey, Reston, VA.	U.S. Geological Survey	USGS		48.2558	-103.689	0.01	22	22	22	ICPAES	SEDIMENTARY	UNKNOWN	UNKNOWN	CLAYSTONE																							4.8	1000	43	17	43		120
D239873		USGS		Geochemistry of rock samples from the National Geochemical Database: U.S. Geological Survey, Reston, VA.	U.S. Geological Survey	USGS		48.2558	-103.689	0.01	22	22	22	XRF	SEDIMENTARY	UNKNOWN	UNKNOWN	CLAYSTONE		56.4	0.7	15.5					0.13	2.79	3.29	1.49	2.93	0.21
D239875		USGS		Geochemistry of rock samples from the National Geochemical Database: U.S. Geological Survey, Reston, VA.	U.S. Geological Survey	USGS		48.2486	-103.517	0.01	22	22	22	ICPAES	SEDIMENTARY	UNKNOWN	UNKNOWN	CLAYSTONE																							4.3	980	43	21	56		120
D239875		USGS		Geochemistry of rock samples from the National Geochemical Database: U.S. Geological Survey, Reston, VA.	U.S. Geological Survey	USGS		48.2486	-103.517	0.01	22	22	22	XRF	SEDIMENTARY	UNKNOWN	UNKNOWN	CLAYSTONE		53.3	0.68	15.1					0.13	2.92	5.06	1.21	2.77	0.2
D239876		USGS		Geochemistry of rock samples from the National Geochemical Database: U.S. Geological Survey, Reston, VA.	U.S. Geological Survey	USGS		48.2486	-103.517	0.01	22	22	22	ICPAES	SEDIMENTARY	UNKNOWN	UNKNOWN	CLAYSTONE																							2.3	530	28	27	30		90
D239876		USGS		Geochemistry of rock samples from the National Geochemical Database: U.S. Geological Survey, Reston, VA.	U.S. Geological Survey	USGS		48.2486	-103.517	0.01	22	22	22	XRF	SEDIMENTARY	UNKNOWN	UNKNOWN	CLAYSTONE		55.4	0.55	11.4					0.06	3.64	8.34	1.07	2.21	0.17
D239877		USGS		Geochemistry of rock samples from the National Geochemical Database: U.S. Geological Survey, Reston, VA.	U.S. Geological Survey	USGS		48.2486	-103.517	0.01	22	22	22	ICPAES	SEDIMENTARY	UNKNOWN	UNKNOWN	CLAYSTONE																							3	510	42	33	42		100
D239877		USGS		Geochemistry of rock samples from the National Geochemical Database: U.S. Geological Survey, Reston, VA.	U.S. Geological Survey	USGS		48.2486	-103.517	0.01	22	22	22	XRF	SEDIMENTARY	UNKNOWN	UNKNOWN	CLAYSTONE		61.1	0.6	12.7					0.06	2.75	4.57	1.6	2.01	0.19
D239879		USGS		Geochemistry of rock samples from the National Geochemical Database: U.S. Geological Survey, Reston, VA.	U.S. Geological Survey	USGS		48.1981	-103.798	0.01	22	22	22	ICPAES	SEDIMENTARY	UNKNOWN	UNKNOWN	CLAYSTONE																							3.2	670	37	22	41		100
D239879		USGS		Geochemistry of rock samples from the National Geochemical Database: U.S. Geological Survey, Reston, VA.	U.S. Geological Survey	USGS		48.1981	-103.798	0.01	22	22	22	XRF	SEDIMENTARY	UNKNOWN	UNKNOWN	CLAYSTONE		61.5	0.67	13.3					0.08	2.59	4.46	1.75	2.3	0.22
D239881		USGS		Geochemistry of rock samples from the National Geochemical Database: U.S. Geological Survey, Reston, VA.	U.S. Geological Survey	USGS		48.1981	-103.798	0.01	22	22	22	ICPAES	SEDIMENTARY	UNKNOWN	UNKNOWN	CLAYSTONE																							2	560	16	5	30		110
D239881		USGS		Geochemistry of rock samples from the National Geochemical Database: U.S. Geological Survey, Reston, VA.	U.S. Geological Survey	USGS		48.1981	-103.798	0.01	22	22	22	XRF	SEDIMENTARY	UNKNOWN	UNKNOWN	CLAYSTONE		49.9	0.49	11.7					0.07	3.93	11.7	0.7	2.53	0.14
D239883		USGS		Geochemistry of rock samples from the National Geochemical Database: U.S. Geological Survey, Reston, VA.	U.S. Geological Survey	USGS		48.2558	-103.689	0.01	22	22	22	ICPAES	SEDIMENTARY	UNKNOWN	UNKNOWN	CLAYSTONE																							2.3	450	22	18	29		60
D239883		USGS		Geochemistry of rock samples from the National Geochemical Database: U.S. Geological Survey, Reston, VA.	U.S. Geological Survey	USGS		48.2558	-103.689	0.01	22	22	22	XRF	SEDIMENTARY	UNKNOWN	UNKNOWN	CLAYSTONE		66.4	0.59	10.2					0.05	2.39	5.14	1.26	2.14	0.17
D239884		USGS		Geochemistry of rock samples from the National Geochemical Database: U.S. Geological Survey, Reston, VA.	U.S. Geological Survey	USGS		48.1981	-103.798	0.01	22	22	22	ICPAES	SEDIMENTARY	UNKNOWN	UNKNOWN	CLAYSTONE																							5.4	1200	47	24	57		140
D239884		USGS		Geochemistry of rock samples from the National Geochemical Database: U.S. Geological Survey, Reston, VA.	U.S. Geological Survey	USGS		48.1981	-103.798	0.01	22	22	22	XRF	SEDIMENTARY	UNKNOWN	UNKNOWN	CLAYSTONE		53.8	0.79	16.2					0.16	2.59	3.58	1.48	2.79	0.21
D239885		USGS		Geochemistry of rock samples from the National Geochemical Database: U.S. Geological Survey, Reston, VA.	U.S. Geological Survey	USGS		48.2486	-103.517	0.01	22	22	22	ICPAES	SEDIMENTARY	UNKNOWN	UNKNOWN	CLAYSTONE																							3.8	870	44	18	58		130
D239885		USGS		Geochemistry of rock samples from the National Geochemical Database: U.S. Geological Survey, Reston, VA.	U.S. Geological Survey	USGS		48.2486	-103.517	0.01	22	22	22	XRF	SEDIMENTARY	UNKNOWN	UNKNOWN	CLAYSTONE		56.6	0.68	14.4					0.11	2.89	4.71	1.28	2.58	0.19
D239892		USGS		Geochemistry of rock samples from the National Geochemical Database: U.S. Geological Survey, Reston, VA.	U.S. Geological Survey	USGS		48.2558	-103.689	0.01	22	22	22	ICPAES	SEDIMENTARY	UNKNOWN	UNKNOWN	CLAYSTONE																							3.9	750	52	18	60		130
D239892		USGS		Geochemistry of rock samples from the National Geochemical Database: U.S. Geological Survey, Reston, VA.	U.S. Geological Survey	USGS		48.2558	-103.689	0.01	22	22	22	XRF	SEDIMENTARY	UNKNOWN	UNKNOWN	CLAYSTONE		58.1	0.73	15.7					0.09	2.83	3.42	1.56	2.93	0.21
D239893		USGS		Geochemistry of rock samples from the National Geochemical Database: U.S. Geological Survey, Reston, VA.	U.S. Geological Survey	USGS		48.1981	-103.798	0.01	22	22	22	ICPAES	SEDIMENTARY	UNKNOWN	UNKNOWN	CLAYSTONE																							3.6	860	46	23	54		110
D239893		USGS		Geochemistry of rock samples from the National Geochemical Database: U.S. Geological Survey, Reston, VA.	U.S. Geological Survey	USGS		48.1981	-103.798	0.01	22	22	22	XRF	SEDIMENTARY	UNKNOWN	UNKNOWN	CLAYSTONE		55.8	0.69	13.6					0.11	3.23	5.89	1.5	2.53	0.2
D239895		USGS		Geochemistry of rock samples from the National Geochemical Database: U.S. Geological Survey, Reston, VA.	U.S. Geological Survey	USGS		48.1981	-103.798	0.01	22	22	22	ICPAES	SEDIMENTARY	UNKNOWN	UNKNOWN	CLAYSTONE																							4.2	910	51	23	57		140
D239895		USGS		Geochemistry of rock samples from the National Geochemical Database: U.S. Geological Survey, Reston, VA.	U.S. Geological Survey	USGS		48.1981	-103.798	0.01	22	22	22	XRF	SEDIMENTARY	UNKNOWN	UNKNOWN	CLAYSTONE		56.7	0.74	15.4					0.12	3.08	3.52	1.33	2.78	0.21
D239900		USGS		Geochemistry of rock samples from the National Geochemical Database: U.S. Geological Survey, Reston, VA.	U.S. Geological Survey	USGS		48.1981	-103.798	0.01	22	22	22	XRF	SEDIMENTARY	UNKNOWN	UNKNOWN	CLAYSTONE		62.1	0.71	14.2					0.03	3.04	2.82	1.39	2.48	0.21
D239898		USGS		Geochemistry of rock samples from the National Geochemical Database: U.S. Geological Survey, Reston, VA.	U.S. Geological Survey	USGS		48.2558	-103.689	0.01	22	22	22	ICPAES	SEDIMENTARY	UNKNOWN	UNKNOWN	CLAYSTONE																							2.3	170	22	7	24		100
D239898		USGS		Geochemistry of rock samples from the National Geochemical Database: U.S. Geological Survey, Reston, VA.	U.S. Geological Survey	USGS		48.2558	-103.689	0.01	22	22	22	XRF	SEDIMENTARY	UNKNOWN	UNKNOWN	CLAYSTONE		70.8	0.66	13						1.72	0.95	0.78	2.96	0.16
D239899		USGS		Geochemistry of rock samples from the National Geochemical Database: U.S. Geological Survey, Reston, VA.	U.S. Geological Survey	USGS		48.2486	-103.517	0.01	22	22	22	ICPAES	SEDIMENTARY	UNKNOWN	UNKNOWN	CLAYSTONE																							3.6	470	65	27	67		150
D239899		USGS		Geochemistry of rock samples from the National Geochemical Database: U.S. Geological Survey, Reston, VA.	U.S. Geological Survey	USGS		48.2486	-103.517	0.01	22	22	22	XRF	SEDIMENTARY	UNKNOWN	UNKNOWN	CLAYSTONE		59.2	0.8	17.2					0.05	2.72	1.53	1.36	2.96	0.21
D239900		USGS		Geochemistry of rock samples from the National Geochemical Database: U.S. Geological Survey, Reston, VA.	U.S. Geological Survey	USGS		48.1981	-103.798	0.01	22	22	22	ICPAES	SEDIMENTARY	UNKNOWN	UNKNOWN	CLAYSTONE																							3.2	310	30	11	50		100
D239902		USGS		Geochemistry of rock samples from the National Geochemical Database: U.S. Geological Survey, Reston, VA.	U.S. Geological Survey	USGS		48.1981	-103.798	0.01	22	22	22	ICPAES	SEDIMENTARY	UNKNOWN	UNKNOWN	CLAYSTONE																							3.2	240	31	17	50		120
D239902		USGS		Geochemistry of rock samples from the National Geochemical Database: U.S. Geological Survey, Reston, VA.	U.S. Geological Survey	USGS		48.1981	-103.798	0.01	22	22	22	XRF	SEDIMENTARY	UNKNOWN	UNKNOWN	CLAYSTONE		60.5	0.7	15.1					0.02	2.89	2.29	1.31	2.92	0.19
D239904		USGS		Geochemistry of rock samples from the National Geochemical Database: U.S. Geological Survey, Reston, VA.	U.S. Geological Survey	USGS		48.1981	-103.798	0.01	22	22	22	ICPAES	SEDIMENTARY	UNKNOWN	UNKNOWN	CLAYSTONE																							2.1	41	16	22	17		90	50
D239904		USGS		Geochemistry of rock samples from the National Geochemical Database: U.S. Geological Survey, Reston, VA.	U.S. Geological Survey	USGS		48.1981	-103.798	0.01	22	22	22	XRF	SEDIMENTARY	UNKNOWN	UNKNOWN	CLAYSTONE		65.7	0.75	18						1.22	0.11	0.74	3.02
D239905		USGS		Geochemistry of rock samples from the National Geochemical Database: U.S. Geological Survey, Reston, VA.	U.S. Geological Survey	USGS		48.2558	-103.689	0.01	22	22	22	ICPAES	SEDIMENTARY	UNKNOWN	UNKNOWN	CLAYSTONE																							3	420	44	20	40		140
D239905		USGS		Geochemistry of rock samples from the National Geochemical Database: U.S. Geological Survey, Reston, VA.	U.S. Geological Survey	USGS		48.2558	-103.689	0.01	22	22	22	XRF	SEDIMENTARY	UNKNOWN	UNKNOWN	CLAYSTONE		59.9	0.72	14.4					0.05	2.92	3.24	1.61	2.53	0.2
D239908		USGS		Geochemistry of rock samples from the National Geochemical Database: U.S. Geological Survey, Reston, VA.	U.S. Geological Survey	USGS		48.1981	-103.798	0.01	22	22	22	XRF	SEDIMENTARY	UNKNOWN	UNKNOWN	CLAYSTONE		62.2	0.63	12.8					0.06	2.57	4.4	1.78	2.17	0.2
D239907		USGS		Geochemistry of rock samples from the National Geochemical Database: U.S. Geological Survey, Reston, VA.	U.S. Geological Survey	USGS		48.2486	-103.517	0.01	22	22	22	ICPAES	SEDIMENTARY	UNKNOWN	UNKNOWN	CLAYSTONE																							2.9	280	32	12	43		90	20
D239907		USGS		Geochemistry of rock samples from the National Geochemical Database: U.S. Geological Survey, Reston, VA.	U.S. Geological Survey	USGS		48.2486	-103.517	0.01	22	22	22	XRF	SEDIMENTARY	UNKNOWN	UNKNOWN	CLAYSTONE		53.6	0.49	13					0.03	4.05	5.58	0.57	3.18	0.11
D239908		USGS		Geochemistry of rock samples from the National Geochemical Database: U.S. Geological Survey, Reston, VA.	U.S. Geological Survey	USGS		48.1981	-103.798	0.01	22	22	22	ICPAES	SEDIMENTARY	UNKNOWN	UNKNOWN	CLAYSTONE																							2.9	520	39	22	39		80
[truncated: 2,273 more rows]
[truncated: 81 more columns]

## Sheet: References
References
AUTHOR	YEAR	TITLE	JOURNAL
[truncated: 44 more rows]
