# Supplementary material for: Basic chemical compositions combination rules and quantitative criterion of red beds
Source: Copernicus journal article supplement (doi:10.5194/egusphere-2023-2590), 2024-01-29
Supplement: Supplementary file 5 [file Supplementary Table 13-dolomite_EarthChem.xlsx]

## Sheet: Data
EarthChem Download: Saturday, May. 6, 2023 7:54:59 am
Search Criteria:
RockName	dolomite
SAMPLE ID	IGSN	SOURCE	DOI	TITLE	JOURNAL	AUTHOR	CRUISEID	LATITUDE	LONGITUDE	LOC PREC	MIN AGE	AGE	MAX AGE	METHOD	MATERIAL	TYPE	COMPOSITION	ROCK NAME	MINERAL	SIO2	TIO2	AL2O3	CR2O3	FE2O3	FE2O3T	FEO	FEOT	MNO	MGO	CAO	SRO	NA2O	K2O	P2O5	LOI	H2O	H2O_M	H2O_P	V2O5	SI	FE	MN	NI	CO	CU	CD	ZN	AS	AG
DOLOMITE		GEOROC	10.1016/0009-2541(95)00102-1	THE INFLUENCE OF ALTERATION ON THE TRACE-ELEMENT AND ND ISOTOPIC COMPOSITIONS OF KOMATIITES	CHEM. GEOL.	LAHAYE, Y.; ARNDT, N. T.; BYERLY, G. R.; CHAUVEL, C.; FOURCADE, S.; GRUAU, G.		48.47	-81.4	0.01				XRF	SEDIMENTARY			DOLOMITE		0.02	0.01	0.04			2.48			0.38	21.56	31.27		0.01	0	0.03
DOLOMITE		GEOROC	10.1016/0009-2541(95)00102-1	THE INFLUENCE OF ALTERATION ON THE TRACE-ELEMENT AND ND ISOTOPIC COMPOSITIONS OF KOMATIITES	CHEM. GEOL.	LAHAYE, Y.; ARNDT, N. T.; BYERLY, G. R.; CHAUVEL, C.; FOURCADE, S.; GRUAU, G.		48.47	-81.4	0.01				ICPMS	SEDIMENTARY			DOLOMITE																									0.02
6		GEOROC	10.1016/j.precamres.2004.09.006	GEOCHEMISTRY OF PRECAMBRIAN CARBONATE INTERCALATED IN PILLOWS AND ITS HOST BASALT: IMPLICATIONS FOR THE REE COMPOSITION OF CIRCA 3.4 GA SEAWATER	PREC. RESEARCH	YAMAMOTO, KOSHI; ITOH, N.; MATSUMOTO, TAKUYA; TANAKA, TSUYOSHI; ADACHI, M.		-20.8167	119.517	0.0001				XRF	SEDIMENTARY			DOLOMITE		10.27	0.003	0.047		4.26				1.41	14.59	28.21		0	0.006	0.12
6		GEOROC	10.1016/j.precamres.2004.09.006	GEOCHEMISTRY OF PRECAMBRIAN CARBONATE INTERCALATED IN PILLOWS AND ITS HOST BASALT: IMPLICATIONS FOR THE REE COMPOSITION OF CIRCA 3.4 GA SEAWATER	PREC. RESEARCH	YAMAMOTO, KOSHI; ITOH, N.; MATSUMOTO, TAKUYA; TANAKA, TSUYOSHI; ADACHI, M.		-20.8167	119.517	0.0001				IGN	SEDIMENTARY			DOLOMITE																	40.24
6		GEOROC	10.1016/j.precamres.2004.09.006	GEOCHEMISTRY OF PRECAMBRIAN CARBONATE INTERCALATED IN PILLOWS AND ITS HOST BASALT: IMPLICATIONS FOR THE REE COMPOSITION OF CIRCA 3.4 GA SEAWATER	PREC. RESEARCH	YAMAMOTO, KOSHI; ITOH, N.; MATSUMOTO, TAKUYA; TANAKA, TSUYOSHI; ADACHI, M.		-20.8167	119.517	0.0001				ICPMS	SEDIMENTARY			DOLOMITE
7		GEOROC	10.1016/j.precamres.2004.09.006	GEOCHEMISTRY OF PRECAMBRIAN CARBONATE INTERCALATED IN PILLOWS AND ITS HOST BASALT: IMPLICATIONS FOR THE REE COMPOSITION OF CIRCA 3.4 GA SEAWATER	PREC. RESEARCH	YAMAMOTO, KOSHI; ITOH, N.; MATSUMOTO, TAKUYA; TANAKA, TSUYOSHI; ADACHI, M.		-20.8167	119.517	0.0001				XRF	SEDIMENTARY			DOLOMITE		7.15	0.001	0.082		4.48				1.37	13.51	28.57		0	0.016	0.019
7		GEOROC	10.1016/j.precamres.2004.09.006	GEOCHEMISTRY OF PRECAMBRIAN CARBONATE INTERCALATED IN PILLOWS AND ITS HOST BASALT: IMPLICATIONS FOR THE REE COMPOSITION OF CIRCA 3.4 GA SEAWATER	PREC. RESEARCH	YAMAMOTO, KOSHI; ITOH, N.; MATSUMOTO, TAKUYA; TANAKA, TSUYOSHI; ADACHI, M.		-20.8167	119.517	0.0001				IGN	SEDIMENTARY			DOLOMITE																	41.09
7		GEOROC	10.1016/j.precamres.2004.09.006	GEOCHEMISTRY OF PRECAMBRIAN CARBONATE INTERCALATED IN PILLOWS AND ITS HOST BASALT: IMPLICATIONS FOR THE REE COMPOSITION OF CIRCA 3.4 GA SEAWATER	PREC. RESEARCH	YAMAMOTO, KOSHI; ITOH, N.; MATSUMOTO, TAKUYA; TANAKA, TSUYOSHI; ADACHI, M.		-20.8167	119.517	0.0001				ICPMS	SEDIMENTARY			DOLOMITE
8		GEOROC	10.1016/j.precamres.2004.09.006	GEOCHEMISTRY OF PRECAMBRIAN CARBONATE INTERCALATED IN PILLOWS AND ITS HOST BASALT: IMPLICATIONS FOR THE REE COMPOSITION OF CIRCA 3.4 GA SEAWATER	PREC. RESEARCH	YAMAMOTO, KOSHI; ITOH, N.; MATSUMOTO, TAKUYA; TANAKA, TSUYOSHI; ADACHI, M.		-20.8167	119.517	0.0001				XRF	SEDIMENTARY			DOLOMITE		6.46	0.002	0.052		4.54				1.34	13.24	29.59		0	0.01	0.022
8		GEOROC	10.1016/j.precamres.2004.09.006	GEOCHEMISTRY OF PRECAMBRIAN CARBONATE INTERCALATED IN PILLOWS AND ITS HOST BASALT: IMPLICATIONS FOR THE REE COMPOSITION OF CIRCA 3.4 GA SEAWATER	PREC. RESEARCH	YAMAMOTO, KOSHI; ITOH, N.; MATSUMOTO, TAKUYA; TANAKA, TSUYOSHI; ADACHI, M.		-20.8167	119.517	0.0001				IGN	SEDIMENTARY			DOLOMITE																	41.24
8		GEOROC	10.1016/j.precamres.2004.09.006	GEOCHEMISTRY OF PRECAMBRIAN CARBONATE INTERCALATED IN PILLOWS AND ITS HOST BASALT: IMPLICATIONS FOR THE REE COMPOSITION OF CIRCA 3.4 GA SEAWATER	PREC. RESEARCH	YAMAMOTO, KOSHI; ITOH, N.; MATSUMOTO, TAKUYA; TANAKA, TSUYOSHI; ADACHI, M.		-20.8167	119.517	0.0001				ICPMS	SEDIMENTARY			DOLOMITE
9		GEOROC	10.1016/j.precamres.2004.09.006	GEOCHEMISTRY OF PRECAMBRIAN CARBONATE INTERCALATED IN PILLOWS AND ITS HOST BASALT: IMPLICATIONS FOR THE REE COMPOSITION OF CIRCA 3.4 GA SEAWATER	PREC. RESEARCH	YAMAMOTO, KOSHI; ITOH, N.; MATSUMOTO, TAKUYA; TANAKA, TSUYOSHI; ADACHI, M.		-20.8167	119.517	0.0001				XRF	SEDIMENTARY			DOLOMITE		4.63	0.002	0.07		4.63				1.39	13.66	28.46		0	0.012	0.025
9		GEOROC	10.1016/j.precamres.2004.09.006	GEOCHEMISTRY OF PRECAMBRIAN CARBONATE INTERCALATED IN PILLOWS AND ITS HOST BASALT: IMPLICATIONS FOR THE REE COMPOSITION OF CIRCA 3.4 GA SEAWATER	PREC. RESEARCH	YAMAMOTO, KOSHI; ITOH, N.; MATSUMOTO, TAKUYA; TANAKA, TSUYOSHI; ADACHI, M.		-20.8167	119.517	0.0001				IGN	SEDIMENTARY			DOLOMITE																	42.6
9		GEOROC	10.1016/j.precamres.2004.09.006	GEOCHEMISTRY OF PRECAMBRIAN CARBONATE INTERCALATED IN PILLOWS AND ITS HOST BASALT: IMPLICATIONS FOR THE REE COMPOSITION OF CIRCA 3.4 GA SEAWATER	PREC. RESEARCH	YAMAMOTO, KOSHI; ITOH, N.; MATSUMOTO, TAKUYA; TANAKA, TSUYOSHI; ADACHI, M.		-20.8167	119.517	0.0001				ICPMS	SEDIMENTARY			DOLOMITE
10		GEOROC	10.1016/j.precamres.2004.09.006	GEOCHEMISTRY OF PRECAMBRIAN CARBONATE INTERCALATED IN PILLOWS AND ITS HOST BASALT: IMPLICATIONS FOR THE REE COMPOSITION OF CIRCA 3.4 GA SEAWATER	PREC. RESEARCH	YAMAMOTO, KOSHI; ITOH, N.; MATSUMOTO, TAKUYA; TANAKA, TSUYOSHI; ADACHI, M.		-20.8167	119.517	0.0001				XRF	SEDIMENTARY			DOLOMITE		5.23	0.001	0.016		4.95				1.38	14.91	29.06		0	0	0.017
10		GEOROC	10.1016/j.precamres.2004.09.006	GEOCHEMISTRY OF PRECAMBRIAN CARBONATE INTERCALATED IN PILLOWS AND ITS HOST BASALT: IMPLICATIONS FOR THE REE COMPOSITION OF CIRCA 3.4 GA SEAWATER	PREC. RESEARCH	YAMAMOTO, KOSHI; ITOH, N.; MATSUMOTO, TAKUYA; TANAKA, TSUYOSHI; ADACHI, M.		-20.8167	119.517	0.0001				IGN	SEDIMENTARY			DOLOMITE																	42.12
10		GEOROC	10.1016/j.precamres.2004.09.006	GEOCHEMISTRY OF PRECAMBRIAN CARBONATE INTERCALATED IN PILLOWS AND ITS HOST BASALT: IMPLICATIONS FOR THE REE COMPOSITION OF CIRCA 3.4 GA SEAWATER	PREC. RESEARCH	YAMAMOTO, KOSHI; ITOH, N.; MATSUMOTO, TAKUYA; TANAKA, TSUYOSHI; ADACHI, M.		-20.8167	119.517	0.0001				ICPMS	SEDIMENTARY			DOLOMITE
11		GEOROC	10.1016/j.precamres.2004.09.006	GEOCHEMISTRY OF PRECAMBRIAN CARBONATE INTERCALATED IN PILLOWS AND ITS HOST BASALT: IMPLICATIONS FOR THE REE COMPOSITION OF CIRCA 3.4 GA SEAWATER	PREC. RESEARCH	YAMAMOTO, KOSHI; ITOH, N.; MATSUMOTO, TAKUYA; TANAKA, TSUYOSHI; ADACHI, M.		-20.8167	119.517	0.0001				XRF	SEDIMENTARY			DOLOMITE		3.16	0.002	0.095		5.4				1.37	14.78	29.57		0	0.01	0.016
11		GEOROC	10.1016/j.precamres.2004.09.006	GEOCHEMISTRY OF PRECAMBRIAN CARBONATE INTERCALATED IN PILLOWS AND ITS HOST BASALT: IMPLICATIONS FOR THE REE COMPOSITION OF CIRCA 3.4 GA SEAWATER	PREC. RESEARCH	YAMAMOTO, KOSHI; ITOH, N.; MATSUMOTO, TAKUYA; TANAKA, TSUYOSHI; ADACHI, M.		-20.8167	119.517	0.0001				IGN	SEDIMENTARY			DOLOMITE																	43
11		GEOROC	10.1016/j.precamres.2004.09.006	GEOCHEMISTRY OF PRECAMBRIAN CARBONATE INTERCALATED IN PILLOWS AND ITS HOST BASALT: IMPLICATIONS FOR THE REE COMPOSITION OF CIRCA 3.4 GA SEAWATER	PREC. RESEARCH	YAMAMOTO, KOSHI; ITOH, N.; MATSUMOTO, TAKUYA; TANAKA, TSUYOSHI; ADACHI, M.		-20.8167	119.517	0.0001				ICPMS	SEDIMENTARY			DOLOMITE
7-4		GEOROC		PRECAMBRIAN VOLCANISM AND SEDIMENTOGENESIS IN THE NORTH-EASTERN PART OF THE BALTIC SHIELD		PREDOVSKIY, A. A.; MELEZHIK, V. A.; BOLOTOV, V. I.; FEDOTOV, ZH. A.; BASALAEV, A. A.; KOZLOV, N. E.; IVANOV, A. A.		64.8	34	0.1				NOT	SEDIMENTARY			DOLOMITE		17.49	0.3	3.74		0.74		2.03		0.12	12.01	32.54		0.38	0.52	0.14									16
3-3		GEOROC		PRECAMBRIAN VOLCANISM AND SEDIMENTOGENESIS IN THE NORTH-EASTERN PART OF THE BALTIC SHIELD		PREDOVSKIY, A. A.; MELEZHIK, V. A.; BOLOTOV, V. I.; FEDOTOV, ZH. A.; BASALAEV, A. A.; KOZLOV, N. E.; IVANOV, A. A.		64.8	34	0.1				NOT	SEDIMENTARY			DOLOMITE		16.76	0.15	2.9		1.64		7.94		0.22	12.08	27.22		0.21	0.12	0.03									45
3-3		GEOROC		PRECAMBRIAN VOLCANISM AND SEDIMENTOGENESIS IN THE NORTH-EASTERN PART OF THE BALTIC SHIELD		PREDOVSKIY, A. A.; MELEZHIK, V. A.; BOLOTOV, V. I.; FEDOTOV, ZH. A.; BASALAEV, A. A.; KOZLOV, N. E.; IVANOV, A. A.		64.8	34	0.1				NOT	SEDIMENTARY			DOLOMITE		13.88	0.19	0.45		0.37		0.2		0.03	19.75	28.19		0.09	0.1	0.05									21
5-20		GEOROC		PRECAMBRIAN VOLCANISM AND SEDIMENTOGENESIS IN THE NORTH-EASTERN PART OF THE BALTIC SHIELD		PREDOVSKIY, A. A.; MELEZHIK, V. A.; BOLOTOV, V. I.; FEDOTOV, ZH. A.; BASALAEV, A. A.; KOZLOV, N. E.; IVANOV, A. A.		69.47	30.73	0.01				NOT	SEDIMENTARY			DOLOMITE		18.27	0.04	0.81		0.44		0.18		0.05	16.14	25.85		0.14	0.59					0.76					12
2-9		GEOROC		PRECAMBRIAN VOLCANISM AND SEDIMENTOGENESIS IN THE NORTH-EASTERN PART OF THE BALTIC SHIELD		PREDOVSKIY, A. A.; MELEZHIK, V. A.; BOLOTOV, V. I.; FEDOTOV, ZH. A.; BASALAEV, A. A.; KOZLOV, N. E.; IVANOV, A. A.		69.47	30.73	0.01				NOT	SEDIMENTARY			DOLOMITE		43.29	0.07	0.75		0.48		0.36		0.03	11.26	17.7		0.17	0.38					0.08					15
2-6		GEOROC		PRECAMBRIAN VOLCANISM AND SEDIMENTOGENESIS IN THE NORTH-EASTERN PART OF THE BALTIC SHIELD		PREDOVSKIY, A. A.; MELEZHIK, V. A.; BOLOTOV, V. I.; FEDOTOV, ZH. A.; BASALAEV, A. A.; KOZLOV, N. E.; IVANOV, A. A.		69.47	30.73	0.01				NOT	SEDIMENTARY			DOLOMITE		6.18	0.07	1.02		0.25		0.74		0.08	15.91	32.47		0.02	0.22	0.03				0.44					6
8-27		GEOROC		PRECAMBRIAN VOLCANISM AND SEDIMENTOGENESIS IN THE NORTH-EASTERN PART OF THE BALTIC SHIELD		PREDOVSKIY, A. A.; MELEZHIK, V. A.; BOLOTOV, V. I.; FEDOTOV, ZH. A.; BASALAEV, A. A.; KOZLOV, N. E.; IVANOV, A. A.		69.47	30.73	0.01				NOT	SEDIMENTARY			DOLOMITE		12.96	0.09	1.93		1.19		1.3		0.13	16.19	27.33		0.27	0.41	0.07				0.96					12
2-6		GEOROC		PRECAMBRIAN VOLCANISM AND SEDIMENTOGENESIS IN THE NORTH-EASTERN PART OF THE BALTIC SHIELD		PREDOVSKIY, A. A.; MELEZHIK, V. A.; BOLOTOV, V. I.; FEDOTOV, ZH. A.; BASALAEV, A. A.; KOZLOV, N. E.; IVANOV, A. A.		69.41	30.5	0.01				NOT	SEDIMENTARY			DOLOMITE		8.84	0.06	0.52		0.82		1.77		0.47	14.98	31.21		0.33	0.45					0.14					20
5-20		GEOROC		PRECAMBRIAN VOLCANISM AND SEDIMENTOGENESIS IN THE NORTH-EASTERN PART OF THE BALTIC SHIELD		PREDOVSKIY, A. A.; MELEZHIK, V. A.; BOLOTOV, V. I.; FEDOTOV, ZH. A.; BASALAEV, A. A.; KOZLOV, N. E.; IVANOV, A. A.		69.41	30.5	0.01				NOT	SEDIMENTARY			DOLOMITE		31.87	0.32	1.34		2.76		4.18		0.74	10.25	21.22		0.44	0.12	0.18				1.3					320
3-5		GEOROC		PRECAMBRIAN VOLCANISM AND SEDIMENTOGENESIS IN THE NORTH-EASTERN PART OF THE BALTIC SHIELD		PREDOVSKIY, A. A.; MELEZHIK, V. A.; BOLOTOV, V. I.; FEDOTOV, ZH. A.; BASALAEV, A. A.; KOZLOV, N. E.; IVANOV, A. A.		69.41	30.5	0.01				NOT	SEDIMENTARY			DOLOMITE		7.86	0.08	1.47		0.84		0.34		0.11	5.95	42.82		0.02	0.54	0.06				0.84					0
6-23		GEOROC		PRECAMBRIAN VOLCANISM AND SEDIMENTOGENESIS IN THE NORTH-EASTERN PART OF THE BALTIC SHIELD		PREDOVSKIY, A. A.; MELEZHIK, V. A.; BOLOTOV, V. I.; FEDOTOV, ZH. A.; BASALAEV, A. A.; KOZLOV, N. E.; IVANOV, A. A.		69.41	30.5	0.01				NOT	SEDIMENTARY			DOLOMITE		4.92	0.04	0.42		0.13		0.42		0.08	20.59	28.27		0.03	0.11	0.05				0.57					0
4-4		GEOROC		PRECAMBRIAN VOLCANISM AND SEDIMENTOGENESIS IN THE NORTH-EASTERN PART OF THE BALTIC SHIELD		PREDOVSKIY, A. A.; MELEZHIK, V. A.; BOLOTOV, V. I.; FEDOTOV, ZH. A.; BASALAEV, A. A.; KOZLOV, N. E.; IVANOV, A. A.		69.41	30.5	0.01				NOT	SEDIMENTARY			DOLOMITE		17.03	0.06	1.74		0.67		0.76		0.44	13.42	27.31		0.02	0.32	0.01				1.03					23
9-20		GEOROC		PRECAMBRIAN VOLCANISM AND SEDIMENTOGENESIS IN THE NORTH-EASTERN PART OF THE BALTIC SHIELD		PREDOVSKIY, A. A.; MELEZHIK, V. A.; BOLOTOV, V. I.; FEDOTOV, ZH. A.; BASALAEV, A. A.; KOZLOV, N. E.; IVANOV, A. A.		67.1	35.23	0.01				NOT	SEDIMENTARY			DOLOMITE		13.41	0.13	2.42		0.78		3.93		0.49	14.19	25.68		0.37	0.45	0.04				1.46					8
2-5		GEOROC		PRECAMBRIAN VOLCANISM AND SEDIMENTOGENESIS IN THE NORTH-EASTERN PART OF THE BALTIC SHIELD		PREDOVSKIY, A. A.; MELEZHIK, V. A.; BOLOTOV, V. I.; FEDOTOV, ZH. A.; BASALAEV, A. A.; KOZLOV, N. E.; IVANOV, A. A.		67.1	35.23	0.01				NOT	SEDIMENTARY			DOLOMITE		81.5	0.34	8.17		0.84		2.09		0.02	0.82	0.38		2.26	1.44	0.08				1.5					18
9-27		GEOROC		PRECAMBRIAN VOLCANISM AND SEDIMENTOGENESIS IN THE NORTH-EASTERN PART OF THE BALTIC SHIELD		PREDOVSKIY, A. A.; MELEZHIK, V. A.; BOLOTOV, V. I.; FEDOTOV, ZH. A.; BASALAEV, A. A.; KOZLOV, N. E.; IVANOV, A. A.		67.28	35.78	0.01				NOT	SEDIMENTARY			DOLOMITE		22.83	0.09	2.76		0.56		1.19		0.12	15.04	22.46		0.59	0.83	0.42				1.18					15
4-25		GEOROC		PRECAMBRIAN VOLCANISM AND SEDIMENTOGENESIS IN THE NORTH-EASTERN PART OF THE BALTIC SHIELD		PREDOVSKIY, A. A.; MELEZHIK, V. A.; BOLOTOV, V. I.; FEDOTOV, ZH. A.; BASALAEV, A. A.; KOZLOV, N. E.; IVANOV, A. A.		69.47	31.07	0.01				NOT	SEDIMENTARY			DOLOMITE		30.35	0.18	3.27		0.2		3.16		0.2	11.67	19.21		1.26	0.76	0.03				1.22					23
KR-6		GEOROC		GEOCHEMISTRY OF THE PECHENGA COMPLEX		PREDOVSKIY, A. A.; FEDOTOV, ZH. A.; AKHMEDOV, A. M.		69.5	30.41	0.01				NOT	SEDIMENTARY			DOLOMITE		50.15	0.13	0.59		0.43		0.36		0.03	10.32	15.28		0.07	0.35		21.25		0.09						10	10	50
KR-8		GEOROC		GEOCHEMISTRY OF THE PECHENGA COMPLEX		PREDOVSKIY, A. A.; FEDOTOV, ZH. A.; AKHMEDOV, A. M.		69.5	30.41	0.01				NOT	SEDIMENTARY			DOLOMITE		42.64	0.05	0.24		0.8		0.48		0.04	11.91	17.92		0.04	0.24		25.37		0.07						20	20	10
KR-11		GEOROC		GEOCHEMISTRY OF THE PECHENGA COMPLEX		PREDOVSKIY, A. A.; FEDOTOV, ZH. A.; AKHMEDOV, A. M.		69.5	30.41	0.01				NOT	SEDIMENTARY			DOLOMITE		36.57	0.07	0.59		0.32		0.46		0.04	11.91	20.78		0.01	0.22		28.49		0.02	0.11					20	20	10
KR-7		GEOROC		GEOCHEMISTRY OF THE PECHENGA COMPLEX		PREDOVSKIY, A. A.; FEDOTOV, ZH. A.; AKHMEDOV, A. M.		69.5	30.41	0.01				NOT	SEDIMENTARY			DOLOMITE		15.88	0.1	1.79		0.71		0.12		0.04	17.37	25.36		0.05	0.6		37.87		0.13	0.34					10	10	10
KR-9		GEOROC		GEOCHEMISTRY OF THE PECHENGA COMPLEX		PREDOVSKIY, A. A.; FEDOTOV, ZH. A.; AKHMEDOV, A. M.		69.5	30.41	0.01				NOT	SEDIMENTARY			DOLOMITE		15.22	0	0.13		0.27		0.06		0	18.4	26.3		0.02	0.18		38.83		0.1	1.45					10	10	10
TR-4		GEOROC		GEOCHEMISTRY OF THE PECHENGA COMPLEX		PREDOVSKIY, A. A.; FEDOTOV, ZH. A.; AKHMEDOV, A. M.		69.46	30.7	0.01				NOT	SEDIMENTARY			DOLOMITE		19.26	0.03	0.41		0.3		0.31		0.08	16.63	24.98		0.18	0.48		36.87			0.8					10	10	10
TYA-3		GEOROC		GEOCHEMISTRY OF THE PECHENGA COMPLEX		PREDOVSKIY, A. A.; FEDOTOV, ZH. A.; AKHMEDOV, A. M.		69.36	30.92	0.01				NOT	SEDIMENTARY			DOLOMITE		43.8	0.04	1.58		0.38		0.15		0.02	10.9	16.83		0.3	1		24.69		0.15	0.88					10	10	10
TYA-2		GEOROC		GEOCHEMISTRY OF THE PECHENGA COMPLEX		PREDOVSKIY, A. A.; FEDOTOV, ZH. A.; AKHMEDOV, A. M.		69.36	30.92	0.01				NOT	SEDIMENTARY			DOLOMITE		27.46	0.04	0.82		0.4		0.22		0.08	14.64	22.42		0.36	0.9		32.46		0.16	0.84					20	10	30
KYA-1		GEOROC		GEOCHEMISTRY OF THE PECHENGA COMPLEX		PREDOVSKIY, A. A.; FEDOTOV, ZH. A.; AKHMEDOV, A. M.		69.43	30.64	0.01				NOT	SEDIMENTARY			DOLOMITE		13.52	0.04	0.88		0.52		0.2		0.04	13.75	30.19		0.1	0.8		38.62		0.06	0.39					10	10	12
LP-5		GEOROC		GEOCHEMISTRY OF THE PECHENGA COMPLEX		PREDOVSKIY, A. A.; FEDOTOV, ZH. A.; AKHMEDOV, A. M.		69.43	30.34	0.01				NOT	SEDIMENTARY			DOLOMITE		9.86	0.05	0.14		0.83		3.04		0.8	16.33	28		0.24	0.2		40.19		0.05	0.14					20	20	8
LP-13		GEOROC		GEOCHEMISTRY OF THE PECHENGA COMPLEX		PREDOVSKIY, A. A.; FEDOTOV, ZH. A.; AKHMEDOV, A. M.		69.43	30.34	0.01				NOT	SEDIMENTARY			DOLOMITE		22.79	0.19	0.54		1.41		5.14		1.34	12.68	22.91		0.02	0.11	0.18	32.19		0.5						10	10	10
LP-12		GEOROC		GEOCHEMISTRY OF THE PECHENGA COMPLEX		PREDOVSKIY, A. A.; FEDOTOV, ZH. A.; AKHMEDOV, A. M.		69.43	30.34	0.01				NOT	SEDIMENTARY			DOLOMITE		50.7	0.05	0.13		0.87		5.26		0.14	7.18	13.92		0.03	0.06	0.08	21.17		0.06						20	10	10
IYA-3		GEOROC		GEOCHEMISTRY OF THE PECHENGA COMPLEX		PREDOVSKIY, A. A.; FEDOTOV, ZH. A.; AKHMEDOV, A. M.		69.41	30.69	0.01				NOT	SEDIMENTARY			DOLOMITE		28.86	1.3	4.92		9.97		1.58		0.16	11.6	18.05		0.36	2.1		21.01		0.35						920	410	10
IYA-4		GEOROC		GEOCHEMISTRY OF THE PECHENGA COMPLEX		PREDOVSKIY, A. A.; FEDOTOV, ZH. A.; AKHMEDOV, A. M.		69.41	30.69	0.01				NOT	SEDIMENTARY			DOLOMITE		7.82	0.08	0.9		0.81		0.51		0.15	13.63	34.43		0.12	0.7		40.51								20	10	10
LM-11		GEOROC		GEOCHEMISTRY OF THE PECHENGA COMPLEX		PREDOVSKIY, A. A.; FEDOTOV, ZH. A.; AKHMEDOV, A. M.		69.4	30.88	0.01				NOT	SEDIMENTARY			DOLOMITE		15.56		0.75		0.54		0.89		0.15	8.87	39.17		0.05	0.07		33.58			1.79					30	10	12
1		GEOROC		GEOCHEMISTRY OF DEEP ROCKS		KREMENETSKIY, A. A.; OVCHINNIKOV, L. N.		69.3962	30.6087	0.0001				AES	SEDIMENTARY			DOLOMITE																									33.7	25.3	160		73.3
1		GEOROC		GEOCHEMISTRY OF DEEP ROCKS		KREMENETSKIY, A. A.; OVCHINNIKOV, L. N.		69.3962	30.6087	0.0001				AAS	SEDIMENTARY			DOLOMITE
1		GEOROC		GEOCHEMISTRY OF DEEP ROCKS		KREMENETSKIY, A. A.; OVCHINNIKOV, L. N.		69.3962	30.6087	0.0001				NAA	SEDIMENTARY			DOLOMITE
1		GEOROC		GEOCHEMISTRY OF DEEP ROCKS		KREMENETSKIY, A. A.; OVCHINNIKOV, L. N.		69.3962	30.6087	0.0001				AES	SEDIMENTARY			DOLOMITE																									11	8	7.5		22.5
1		GEOROC		GEOCHEMISTRY OF DEEP ROCKS		KREMENETSKIY, A. A.; OVCHINNIKOV, L. N.		69.3962	30.6087	0.0001				AAS	SEDIMENTARY			DOLOMITE
1		GEOROC		GEOCHEMISTRY OF DEEP ROCKS		KREMENETSKIY, A. A.; OVCHINNIKOV, L. N.		69.3962	30.6087	0.0001				NAA	SEDIMENTARY			DOLOMITE
2		GEOROC		GEOCHEMISTRY OF DEEP ROCKS		KREMENETSKIY, A. A.; OVCHINNIKOV, L. N.		69.3962	30.6087	0.0001				NOT	SEDIMENTARY			DOLOMITE																			0.95	0.11
2		GEOROC		GEOCHEMISTRY OF DEEP ROCKS		KREMENETSKIY, A. A.; OVCHINNIKOV, L. N.		69.3962	30.6087	0.0001				AAS	SEDIMENTARY			DOLOMITE														0.15	0.19
2		GEOROC		GEOCHEMISTRY OF DEEP ROCKS		KREMENETSKIY, A. A.; OVCHINNIKOV, L. N.		69.3962	30.6087	0.0001				NAA	SEDIMENTARY			DOLOMITE
2		GEOROC		GEOCHEMISTRY OF DEEP ROCKS		KREMENETSKIY, A. A.; OVCHINNIKOV, L. N.		69.3962	30.6087	0.0001				AES	SEDIMENTARY			DOLOMITE																									9.2	9.8	7.6		28.1
2		GEOROC		GEOCHEMISTRY OF DEEP ROCKS		KREMENETSKIY, A. A.; OVCHINNIKOV, L. N.		69.3962	30.6087	0.0001				WET	SEDIMENTARY			DOLOMITE		15.41	0.07	1.35		0.08		0.43		0.08	18.22	28.22				0.1
2		GEOROC	10.1016/0301-9268(86)90013-6	THE PRECAMBRIAN CONTINENTAL CRUST: ITS STRUCTURE, COMPOSITION AND EVOLUTION AS REVEALED BY DEEP DRILLING IN THE U.S.S.R.	PREC. RESEARCH	KREMENETSKIY, A. A.; OVCHINNIKOV, L. N.		69.3962	30.6087	0.0001				NAA	SEDIMENTARY			DOLOMITE
1		GEOROC		GEOCHEMISTRY OF DEEP ROCKS		KREMENETSKIY, A. A.; OVCHINNIKOV, L. N.		69.3962	30.6087	0.0001				AES	SEDIMENTARY			DOLOMITE																									7.1	6.4	9.8		21.6
1		GEOROC		GEOCHEMISTRY OF DEEP ROCKS		KREMENETSKIY, A. A.; OVCHINNIKOV, L. N.		69.3962	30.6087	0.0001				AAS	SEDIMENTARY			DOLOMITE
1		GEOROC		GEOCHEMISTRY OF DEEP ROCKS		KREMENETSKIY, A. A.; OVCHINNIKOV, L. N.		69.3962	30.6087	0.0001				NAA	SEDIMENTARY			DOLOMITE
LIMESTONE LAKE		GEOROC	10.1016/j.lithos.2009.03.039	“KIMBERLITE” FROM WEKUSKO LAKE, MANITOBA: ACTUALLY A DIAMOND-INDICATOR-BEARING DOLOMITE CARBONATITE	LITHOS	CHAKHMOURADIAN, A. R.; BÖHM, C. O.; DEMENY, A.; REGUIR, E. P.; HEGNER, E.; CREASER, R. A.; CHEN, WEI; YANG, PANSEOK		53.75	-99.33	0.01	430	430	430	MS	SEDIMENTARY			DOLOMITE
88/150		GEOROC	10.1007/BF01164647	CARBONATITE DYKES AT BAYAN OBO, INNER MONGOLIA, CHINA	MINERAL. PETROL.	LE BAS, M. J.; KELLER, J.; KEJIE, TAO; WALL, F.; WILLIAMS, C. T.; ZHANG, PEISHAN		42	110	0.1				XRF	SEDIMENTARY			DOLOMITE		1.17	0.01	0.31			3.78			0.56	17.18	30.62		0.06	0.03	3.25									1				35
88/150		GEOROC	10.1007/BF01164647	CARBONATITE DYKES AT BAYAN OBO, INNER MONGOLIA, CHINA	MINERAL. PETROL.	LE BAS, M. J.; KELLER, J.; KEJIE, TAO; WALL, F.; WILLIAMS, C. T.; ZHANG, PEISHAN		42	110	0.1				IGN	SEDIMENTARY			DOLOMITE																	42.02
88/152		GEOROC	10.1007/BF01164647	CARBONATITE DYKES AT BAYAN OBO, INNER MONGOLIA, CHINA	MINERAL. PETROL.	LE BAS, M. J.; KELLER, J.; KEJIE, TAO; WALL, F.; WILLIAMS, C. T.; ZHANG, PEISHAN		42	110	0.1				XRF	SEDIMENTARY			DOLOMITE		2.1	0	0			4.4			0.8	21.4	34.1		0	0	2.9									29
BO62		GEOROC	10.1007/BF01164647	CARBONATITE DYKES AT BAYAN OBO, INNER MONGOLIA, CHINA	MINERAL. PETROL.	LE BAS, M. J.; KELLER, J.; KEJIE, TAO; WALL, F.; WILLIAMS, C. T.; ZHANG, PEISHAN		42	110	0.1				XRF	SEDIMENTARY			DOLOMITE		1.56	0.01	0.08			4.54			0.74	17.59	32.45		0.04	0.03	3.29
BO62		GEOROC	10.1007/BF01164647	CARBONATITE DYKES AT BAYAN OBO, INNER MONGOLIA, CHINA	MINERAL. PETROL.	LE BAS, M. J.; KELLER, J.; KEJIE, TAO; WALL, F.; WILLIAMS, C. T.; ZHANG, PEISHAN		42	110	0.1				IGN	SEDIMENTARY			DOLOMITE																	38.1
BO63		GEOROC	10.1007/BF01164647	CARBONATITE DYKES AT BAYAN OBO, INNER MONGOLIA, CHINA	MINERAL. PETROL.	LE BAS, M. J.; KELLER, J.; KEJIE, TAO; WALL, F.; WILLIAMS, C. T.; ZHANG, PEISHAN		42	110	0.1				XRF	SEDIMENTARY			DOLOMITE		1.08	0.05	0.01			3.63			0.62	19.05	31.91		0	0.03	1.89
BO63		GEOROC	10.1007/BF01164647	CARBONATITE DYKES AT BAYAN OBO, INNER MONGOLIA, CHINA	MINERAL. PETROL.	LE BAS, M. J.; KELLER, J.; KEJIE, TAO; WALL, F.; WILLIAMS, C. T.; ZHANG, PEISHAN		42	110	0.1				IGN	SEDIMENTARY			DOLOMITE																	40.16
Ch-132		GEOROC	10.1134/S1028334X14030258	ISOTOPE COMPOSITION OF STRONTIUM, CARBON, AND OXYGEN IN MAGNESIAN CARBONATES OF THE ONOT GREENSTONE BELT	DOKL. EARTH SCI.	GOROKHOV, I. M.; DUBININA, E. O.; KUZNETSOV, A. B.; LEVITSKII, V. I.; KONSTANTINOVA, G. V.; TURCHENKO, T. L.; LEVITSKII, I. V.		52.5	102	0.1				TIMS	SEDIMENTARY			DOLOMITE
Ch-132		GEOROC	10.1134/S1028334X14030258	ISOTOPE COMPOSITION OF STRONTIUM, CARBON, AND OXYGEN IN MAGNESIAN CARBONATES OF THE ONOT GREENSTONE BELT	DOKL. EARTH SCI.	GOROKHOV, I. M.; DUBININA, E. O.; KUZNETSOV, A. B.; LEVITSKII, V. I.; KONSTANTINOVA, G. V.; TURCHENKO, T. L.; LEVITSKII, I. V.		52.5	102	0.1				VOL	SEDIMENTARY			DOLOMITE
Ch-132		GEOROC	10.1134/S1028334X14030258	ISOTOPE COMPOSITION OF STRONTIUM, CARBON, AND OXYGEN IN MAGNESIAN CARBONATES OF THE ONOT GREENSTONE BELT	DOKL. EARTH SCI.	GOROKHOV, I. M.; DUBININA, E. O.; KUZNETSOV, A. B.; LEVITSKII, V. I.; KONSTANTINOVA, G. V.; TURCHENKO, T. L.; LEVITSKII, I. V.		52.5	102	0.1				AAS	SEDIMENTARY			DOLOMITE																							0.476	0.116
Ch-132		GEOROC	10.1134/S1028334X14030258	ISOTOPE COMPOSITION OF STRONTIUM, CARBON, AND OXYGEN IN MAGNESIAN CARBONATES OF THE ONOT GREENSTONE BELT	DOKL. EARTH SCI.	GOROKHOV, I. M.; DUBININA, E. O.; KUZNETSOV, A. B.; LEVITSKII, V. I.; KONSTANTINOVA, G. V.; TURCHENKO, T. L.; LEVITSKII, I. V.		52.5	102	0.1				TIMS_ID	SEDIMENTARY			DOLOMITE
H8C B241		GEOROC	10.1007/s00710-006-0177-x	NEW EVIDENCE FROM A CALCITE-DOLOMITE CARBONATITE DYKE FOR THE MAGMATIC ORIGIN OF THE MASSIVE BAYAN OBO ORE-BEARING DOLOMITE MARBLE, INNER MONGOLIA, CHINA	MINERAL. PETROL.	LE BAS, M. J.; XUEMING, Y.; TAYLOR, R. N.; SPIRO, B.; MILTON, J. A.; PEISHAN, Z.		41.8083	109.96	0.0001				XRF	SEDIMENTARY			DOLOMITE		2.72	0.01	0.21			5.78			0.78	14.76	26.25		0	0.07	2.38									0.2	20.1			30.1
H8C B241		GEOROC	10.1007/s00710-006-0177-x	NEW EVIDENCE FROM A CALCITE-DOLOMITE CARBONATITE DYKE FOR THE MAGMATIC ORIGIN OF THE MASSIVE BAYAN OBO ORE-BEARING DOLOMITE MARBLE, INNER MONGOLIA, CHINA	MINERAL. PETROL.	LE BAS, M. J.; XUEMING, Y.; TAYLOR, R. N.; SPIRO, B.; MILTON, J. A.; PEISHAN, Z.		41.8083	109.96	0.0001				ICPMS	SEDIMENTARY			DOLOMITE
MF-1/1599		GEOROC	10.1016/S0377-0273(96)00072-8	CHEMICAL AND ISOTOPIC SIGNATURES OF THE BASEMENT ROCKS FROM THE CAMPI FLEGREI GEOTHERMAL FIELD (NAPLES, SOUTHERN ITALY): INFERENCES ABOUT THE ORIGIN AND EVOLUTION OF ITS HYDROTHERMAL FLUIDS	J. VOLCANOL. GEOTHERM. RES.	CAPRARELLI, G.; TSUTSUMI, M.; TURI, B.		40.83	14.11	0.01				XRF	SEDIMENTARY			DOLOMITE		37.78	0.45	9.9		1.29		2.74		0.11	3.23	24.28		0.85	2.09	0.13		17.15							56
MF-1/1599		GEOROC	10.1016/S0377-0273(96)00072-8	CHEMICAL AND ISOTOPIC SIGNATURES OF THE BASEMENT ROCKS FROM THE CAMPI FLEGREI GEOTHERMAL FIELD (NAPLES, SOUTHERN ITALY): INFERENCES ABOUT THE ORIGIN AND EVOLUTION OF ITS HYDROTHERMAL FLUIDS	J. VOLCANOL. GEOTHERM. RES.	CAPRARELLI, G.; TSUTSUMI, M.; TURI, B.		40.83	14.11	0.01				NOT	SEDIMENTARY			DOLOMITE
SV-3/1946		GEOROC	10.1016/S0377-0273(96)00072-8	CHEMICAL AND ISOTOPIC SIGNATURES OF THE BASEMENT ROCKS FROM THE CAMPI FLEGREI GEOTHERMAL FIELD (NAPLES, SOUTHERN ITALY): INFERENCES ABOUT THE ORIGIN AND EVOLUTION OF ITS HYDROTHERMAL FLUIDS	J. VOLCANOL. GEOTHERM. RES.	CAPRARELLI, G.; TSUTSUMI, M.; TURI, B.		40.83	14.11	0.01				NOT	SEDIMENTARY			DOLOMITE
SV-3/1946		GEOROC	10.1016/S0377-0273(96)00072-8	CHEMICAL AND ISOTOPIC SIGNATURES OF THE BASEMENT ROCKS FROM THE CAMPI FLEGREI GEOTHERMAL FIELD (NAPLES, SOUTHERN ITALY): INFERENCES ABOUT THE ORIGIN AND EVOLUTION OF ITS HYDROTHERMAL FLUIDS	J. VOLCANOL. GEOTHERM. RES.	CAPRARELLI, G.; TSUTSUMI, M.; TURI, B.		40.83	14.11	0.01				XRF	SEDIMENTARY			DOLOMITE		44.17	0.74	15.36		1.44		4.11		0.1	3.99	15.64		1.68	5.09	0.39		2.13							38
OSD 32-93		GEOROC	10.1016/j.lithos.2009.03.039	“KIMBERLITE” FROM WEKUSKO LAKE, MANITOBA: ACTUALLY A DIAMOND-INDICATOR-BEARING DOLOMITE CARBONATITE	LITHOS	CHAKHMOURADIAN, A. R.; BÖHM, C. O.; DEMENY, A.; REGUIR, E. P.; HEGNER, E.; CREASER, R. A.; CHEN, WEI; YANG, PANSEOK		54.75	-99.83	0.01	470	470	470	NOT	SEDIMENTARY			DOLOMITE		1.01	0.01	0.21					0.76	0.07	20.8	30.23		0.33	0.08	0.03									0	0
BBD609		USGS		Geochemistry of rock samples from the National Geochemical Database: U.S. Geological Survey, Reston, VA.	U.S. Geological Survey	USGS		45.0428	-110.023	0.01	69	69	69	AAS	SEDIMENTARY	UNKNOWN	UNKNOWN	DOLOMITE
BBD609		USGS		Geochemistry of rock samples from the National Geochemical Database: U.S. Geological Survey, Reston, VA.	U.S. Geological Survey	USGS		45.0428	-110.023	0.01	69	69	69	ES	SEDIMENTARY	UNKNOWN	UNKNOWN	DOLOMITE																							0.1	70			5
BCO774		USGS		Geochemistry of rock samples from the National Geochemical Database: U.S. Geological Survey, Reston, VA.	U.S. Geological Survey	USGS		65.8972	-147.065	0.01				ES	SEDIMENTARY	UNKNOWN	UNKNOWN	DOLOMITE																							2	1000	150	20	70		300
BDB690		USGS		Geochemistry of rock samples from the National Geochemical Database: U.S. Geological Survey, Reston, VA.	U.S. Geological Survey	USGS		55.1889	-131.728	0.01				AAS	SEDIMENTARY	UNKNOWN	UNKNOWN	DOLOMITE
BDB690		USGS		Geochemistry of rock samples from the National Geochemical Database: U.S. Geological Survey, Reston, VA.	U.S. Geological Survey	USGS		55.1889	-131.728	0.01				ES	SEDIMENTARY	UNKNOWN	UNKNOWN	DOLOMITE																							5	2000		15	15
BDB718		USGS		Geochemistry of rock samples from the National Geochemical Database: U.S. Geological Survey, Reston, VA.	U.S. Geological Survey	USGS		55.1855	-131.805	0.01				AAS	SEDIMENTARY	UNKNOWN	UNKNOWN	DOLOMITE
BDB718		USGS		Geochemistry of rock samples from the National Geochemical Database: U.S. Geological Survey, Reston, VA.	U.S. Geological Survey	USGS		55.1855	-131.805	0.01				ES	SEDIMENTARY	UNKNOWN	UNKNOWN	DOLOMITE																							7		20	50	7		1000
C100851		USGS		Geochemistry of rock samples from the National Geochemical Database: U.S. Geological Survey, Reston, VA.	U.S. Geological Survey	USGS		34.9256	-112.359	0.01	55	55	55	MISC	SEDIMENTARY	UNKNOWN	UNKNOWN	DOLOMITE																	46.5
C100851		USGS		Geochemistry of rock samples from the National Geochemical Database: U.S. Geological Survey, Reston, VA.	U.S. Geological Survey	USGS		34.9256	-112.359	0.01	55	55	55	TITR	SEDIMENTARY	UNKNOWN	UNKNOWN	DOLOMITE
C100851		USGS		Geochemistry of rock samples from the National Geochemical Database: U.S. Geological Survey, Reston, VA.	U.S. Geological Survey	USGS		34.9256	-112.359	0.01	55	55	55	XRF	SEDIMENTARY	UNKNOWN	UNKNOWN	DOLOMITE		0.83		0.14						0.03	20.4	31				0.07
C100852		USGS		Geochemistry of rock samples from the National Geochemical Database: U.S. Geological Survey, Reston, VA.	U.S. Geological Survey	USGS		34.9256	-112.359	0.01	55	55	55	MISC	SEDIMENTARY	UNKNOWN	UNKNOWN	DOLOMITE																	44.1
C100852		USGS		Geochemistry of rock samples from the National Geochemical Database: U.S. Geological Survey, Reston, VA.	U.S. Geological Survey	USGS		34.9256	-112.359	0.01	55	55	55	TITR	SEDIMENTARY	UNKNOWN	UNKNOWN	DOLOMITE
C100852		USGS		Geochemistry of rock samples from the National Geochemical Database: U.S. Geological Survey, Reston, VA.	U.S. Geological Survey	USGS		34.9256	-112.359	0.01	55	55	55	XRF	SEDIMENTARY	UNKNOWN	UNKNOWN	DOLOMITE		4.5	0.03	0.67						0.02	20	29.2			0.2	0.07
C100853		USGS		Geochemistry of rock samples from the National Geochemical Database: U.S. Geological Survey, Reston, VA.	U.S. Geological Survey	USGS		34.9256	-112.359	0.01	55	55	55	MISC	SEDIMENTARY	UNKNOWN	UNKNOWN	DOLOMITE																	46.7
C100853		USGS		Geochemistry of rock samples from the National Geochemical Database: U.S. Geological Survey, Reston, VA.	U.S. Geological Survey	USGS		34.9256	-112.359	0.01	55	55	55	TITR	SEDIMENTARY	UNKNOWN	UNKNOWN	DOLOMITE
C100853		USGS		Geochemistry of rock samples from the National Geochemical Database: U.S. Geological Survey, Reston, VA.	U.S. Geological Survey	USGS		34.9256	-112.359	0.01	55	55	55	XRF	SEDIMENTARY	UNKNOWN	UNKNOWN	DOLOMITE		0.65		0.18						0.02	20.7	30.7				0.06
C100854		USGS		Geochemistry of rock samples from the National Geochemical Database: U.S. Geological Survey, Reston, VA.	U.S. Geological Survey	USGS		34.9256	-112.359	0.01	55	55	55	MISC	SEDIMENTARY	UNKNOWN	UNKNOWN	DOLOMITE																	45
C100854		USGS		Geochemistry of rock samples from the National Geochemical Database: U.S. Geological Survey, Reston, VA.	U.S. Geological Survey	USGS		34.9256	-112.359	0.01	55	55	55	TITR	SEDIMENTARY	UNKNOWN	UNKNOWN	DOLOMITE
C100854		USGS		Geochemistry of rock samples from the National Geochemical Database: U.S. Geological Survey, Reston, VA.	U.S. Geological Survey	USGS		34.9256	-112.359	0.01	55	55	55	XRF	SEDIMENTARY	UNKNOWN	UNKNOWN	DOLOMITE		2.88	0.04	0.69						0.01	20.4	29.9			0.23	0.08
C100855		USGS		Geochemistry of rock samples from the National Geochemical Database: U.S. Geological Survey, Reston, VA.	U.S. Geological Survey	USGS		34.9589	-112.342	0.01	55	55	55	MISC	SEDIMENTARY	UNKNOWN	UNKNOWN	DOLOMITE																	43.1
C100855		USGS		Geochemistry of rock samples from the National Geochemical Database: U.S. Geological Survey, Reston, VA.	U.S. Geological Survey	USGS		34.9589	-112.342	0.01	55	55	55	TITR	SEDIMENTARY	UNKNOWN	UNKNOWN	DOLOMITE
C100855		USGS		Geochemistry of rock samples from the National Geochemical Database: U.S. Geological Survey, Reston, VA.	U.S. Geological Survey	USGS		34.9589	-112.342	0.01	55	55	55	XRF	SEDIMENTARY	UNKNOWN	UNKNOWN	DOLOMITE		6.86	0.02	0.5						0.02	19.4	28.7			0.14	0.06
C100856		USGS		Geochemistry of rock samples from the National Geochemical Database: U.S. Geological Survey, Reston, VA.	U.S. Geological Survey	USGS		34.9589	-112.342	0.01	55	55	55	MISC	SEDIMENTARY	UNKNOWN	UNKNOWN	DOLOMITE																	46.1
C100856		USGS		Geochemistry of rock samples from the National Geochemical Database: U.S. Geological Survey, Reston, VA.	U.S. Geological Survey	USGS		34.9589	-112.342	0.01	55	55	55	TITR	SEDIMENTARY	UNKNOWN	UNKNOWN	DOLOMITE
C100856		USGS		Geochemistry of rock samples from the National Geochemical Database: U.S. Geological Survey, Reston, VA.	U.S. Geological Survey	USGS		34.9589	-112.342	0.01	55	55	55	XRF	SEDIMENTARY	UNKNOWN	UNKNOWN	DOLOMITE		2.18		0.38						0.02	20.4	30			0.08	0.09
C100857		USGS		Geochemistry of rock samples from the National Geochemical Database: U.S. Geological Survey, Reston, VA.	U.S. Geological Survey	USGS		34.9589	-112.342	0.01	55	55	55	MISC	SEDIMENTARY	UNKNOWN	UNKNOWN	DOLOMITE																	44.6
C100857		USGS		Geochemistry of rock samples from the National Geochemical Database: U.S. Geological Survey, Reston, VA.	U.S. Geological Survey	USGS		34.9589	-112.342	0.01	55	55	55	TITR	SEDIMENTARY	UNKNOWN	UNKNOWN	DOLOMITE
C100857		USGS		Geochemistry of rock samples from the National Geochemical Database: U.S. Geological Survey, Reston, VA.	U.S. Geological Survey	USGS		34.9589	-112.342	0.01	55	55	55	XRF	SEDIMENTARY	UNKNOWN	UNKNOWN	DOLOMITE		4.15		0.49						0.02	20	29.3			0.14	0.08
C100858		USGS		Geochemistry of rock samples from the National Geochemical Database: U.S. Geological Survey, Reston, VA.	U.S. Geological Survey	USGS		34.9589	-112.342	0.01	55	55	55	MISC	SEDIMENTARY	UNKNOWN	UNKNOWN	DOLOMITE																	46.5
C100858		USGS		Geochemistry of rock samples from the National Geochemical Database: U.S. Geological Survey, Reston, VA.	U.S. Geological Survey	USGS		34.9589	-112.342	0.01	55	55	55	TITR	SEDIMENTARY	UNKNOWN	UNKNOWN	DOLOMITE
C100858		USGS		Geochemistry of rock samples from the National Geochemical Database: U.S. Geological Survey, Reston, VA.	U.S. Geological Survey	USGS		34.9589	-112.342	0.01	55	55	55	XRF	SEDIMENTARY	UNKNOWN	UNKNOWN	DOLOMITE		0.55								0.02	21.1	30.8				0.07
C100859		USGS		Geochemistry of rock samples from the National Geochemical Database: U.S. Geological Survey, Reston, VA.	U.S. Geological Survey	USGS		34.9589	-112.342	0.01	55	55	55	MISC	SEDIMENTARY	UNKNOWN	UNKNOWN	DOLOMITE																	45
C100859		USGS		Geochemistry of rock samples from the National Geochemical Database: U.S. Geological Survey, Reston, VA.	U.S. Geological Survey	USGS		34.9589	-112.342	0.01	55	55	55	TITR	SEDIMENTARY	UNKNOWN	UNKNOWN	DOLOMITE
C100859		USGS		Geochemistry of rock samples from the National Geochemical Database: U.S. Geological Survey, Reston, VA.	U.S. Geological Survey	USGS		34.9589	-112.342	0.01	55	55	55	XRF	SEDIMENTARY	UNKNOWN	UNKNOWN	DOLOMITE		2.99		0.61						0.02	20.3	29.9			0.17	0.06
C102119		USGS		Geochemistry of rock samples from the National Geochemical Database: U.S. Geological Survey, Reston, VA.	U.S. Geological Survey	USGS		63.8528	-153.624	0.01				AAS	SEDIMENTARY	UNKNOWN	UNKNOWN	DOLOMITE
C102119		USGS		Geochemistry of rock samples from the National Geochemical Database: U.S. Geological Survey, Reston, VA.	U.S. Geological Survey	USGS		63.8528	-153.624	0.01				COL	SEDIMENTARY	UNKNOWN	UNKNOWN	DOLOMITE
C102119		USGS		Geochemistry of rock samples from the National Geochemical Database: U.S. Geological Survey, Reston, VA.	U.S. Geological Survey	USGS		63.8528	-153.624	0.01				ICPAES	SEDIMENTARY	UNKNOWN	UNKNOWN	DOLOMITE																							0.07	32			0.6		1.5
C120387		USGS		Geochemistry of rock samples from the National Geochemical Database: U.S. Geological Survey, Reston, VA.	U.S. Geological Survey	USGS		42.7369	-111.937	0.01	71	71	71	AAS	SEDIMENTARY	UNKNOWN	UNKNOWN	DOLOMITE
C120387		USGS		Geochemistry of rock samples from the National Geochemical Database: U.S. Geological Survey, Reston, VA.	U.S. Geological Survey	USGS		42.7369	-111.937	0.01	71	71	71	ICPAES	SEDIMENTARY	UNKNOWN	UNKNOWN	DOLOMITE																						28	3.56		20		48		24	21	2
C125660		USGS		Geochemistry of rock samples from the National Geochemical Database: U.S. Geological Survey, Reston, VA.	U.S. Geological Survey	USGS		41	-116.037	0.01				AAS	SEDIMENTARY	UNKNOWN	UNKNOWN	DOLOMITE
C125660		USGS		Geochemistry of rock samples from the National Geochemical Database: U.S. Geological Survey, Reston, VA.	U.S. Geological Survey	USGS		41	-116.037	0.01				FAP	SEDIMENTARY	UNKNOWN	UNKNOWN	DOLOMITE
C125660		USGS		Geochemistry of rock samples from the National Geochemical Database: U.S. Geological Survey, Reston, VA.	U.S. Geological Survey	USGS		41	-116.037	0.01				ICPAES	SEDIMENTARY	UNKNOWN	UNKNOWN	DOLOMITE																							0.52	1640	7		12	21	1500	72
C125670		USGS		Geochemistry of rock samples from the National Geochemical Database: U.S. Geological Survey, Reston, VA.	U.S. Geological Survey	USGS		41	-116.037	0.01				AAS	SEDIMENTARY	UNKNOWN	UNKNOWN	DOLOMITE
C125670		USGS		Geochemistry of rock samples from the National Geochemical Database: U.S. Geological Survey, Reston, VA.	U.S. Geological Survey	USGS		41	-116.037	0.01				FAP	SEDIMENTARY	UNKNOWN	UNKNOWN	DOLOMITE
C125670		USGS		Geochemistry of rock samples from the National Geochemical Database: U.S. Geological Survey, Reston, VA.	U.S. Geological Survey	USGS		41	-116.037	0.01				ICPAES	SEDIMENTARY	UNKNOWN	UNKNOWN	DOLOMITE																							4.12	1800	4		43	5	417	370	5
C125671		USGS		Geochemistry of rock samples from the National Geochemical Database: U.S. Geological Survey, Reston, VA.	U.S. Geological Survey	USGS		41	-116.037	0.01				AAS	SEDIMENTARY	UNKNOWN	UNKNOWN	DOLOMITE
C125671		USGS		Geochemistry of rock samples from the National Geochemical Database: U.S. Geological Survey, Reston, VA.	U.S. Geological Survey	USGS		41	-116.037	0.01				FAP	SEDIMENTARY	UNKNOWN	UNKNOWN	DOLOMITE
C125671		USGS		Geochemistry of rock samples from the National Geochemical Database: U.S. Geological Survey, Reston, VA.	U.S. Geological Survey	USGS		41	-116.037	0.01				ICPAES	SEDIMENTARY	UNKNOWN	UNKNOWN	DOLOMITE																							0.47	1470			19	34	2230	74	2
C136916		USGS		Geochemistry of rock samples from the National Geochemical Database: U.S. Geological Survey, Reston, VA.	U.S. Geological Survey	USGS		42.8856	-111.411	0.01	71	71	71	ICPAES	SEDIMENTARY	UNKNOWN	UNKNOWN	DOLOMITE																							0.32	135	14	2	12	12	151
C136953		USGS		Geochemistry of rock samples from the National Geochemical Database: U.S. Geological Survey, Reston, VA.	U.S. Geological Survey	USGS		42.7369	-111.368	0.01	71	71	71	FAP	SEDIMENTARY	UNKNOWN	UNKNOWN	DOLOMITE
C137165		USGS		Geochemistry of rock samples from the National Geochemical Database: U.S. Geological Survey, Reston, VA.	U.S. Geological Survey	USGS		42.6717	-111.35	0.01	71	71	71	ICPAES	SEDIMENTARY	UNKNOWN	UNKNOWN	DOLOMITE																							0.04	109	6	3	10	6	20
C137991		USGS		Geochemistry of rock samples from the National Geochemical Database: U.S. Geological Survey, Reston, VA.	U.S. Geological Survey	USGS		44.2811	-114.411	0.01	69	69	69	AAS	SEDIMENTARY	UNKNOWN	UNKNOWN	DOLOMITE																														9.1
C137991		USGS		Geochemistry of rock samples from the National Geochemical Database: U.S. Geological Survey, Reston, VA.	U.S. Geological Survey	USGS		44.2811	-114.411	0.01	69	69	69	FAP	SEDIMENTARY	UNKNOWN	UNKNOWN	DOLOMITE
C137991		USGS		Geochemistry of rock samples from the National Geochemical Database: U.S. Geological Survey, Reston, VA.	U.S. Geological Survey	USGS		44.2811	-114.411	0.01	69	69	69	ICPAES	SEDIMENTARY	UNKNOWN	UNKNOWN	DOLOMITE																							1.28	1180		3	32	6	661
C138016		USGS		Geochemistry of rock samples from the National Geochemical Database: U.S. Geological Survey, Reston, VA.	U.S. Geological Survey	USGS		44.4147	-114.322	0.01	69	69	69	AAS	SEDIMENTARY	UNKNOWN	UNKNOWN	DOLOMITE																														3.5
C138016		USGS		Geochemistry of rock samples from the National Geochemical Database: U.S. Geological Survey, Reston, VA.	U.S. Geological Survey	USGS		44.4147	-114.322	0.01	69	69	69	ICPAES	SEDIMENTARY	UNKNOWN	UNKNOWN	DOLOMITE																							0.3	306		3	17	5	156
C175674		USGS		Geochemistry of rock samples from the National Geochemical Database: U.S. Geological Survey, Reston, VA.	U.S. Geological Survey	USGS		44.285	-114.411	0.01	69	69	69	AAS	SEDIMENTARY	UNKNOWN	UNKNOWN	DOLOMITE																														7
C175674		USGS		Geochemistry of rock samples from the National Geochemical Database: U.S. Geological Survey, Reston, VA.	U.S. Geological Survey	USGS		44.285	-114.411	0.01	69	69	69	ICPAES	SEDIMENTARY	UNKNOWN	UNKNOWN	DOLOMITE																							0.94	592	8		17		28
C175674		USGS		Geochemistry of rock samples from the National Geochemical Database: U.S. Geological Survey, Reston, VA.	U.S. Geological Survey	USGS		44.285	-114.411	0.01	69	69	69	TITR	SEDIMENTARY	UNKNOWN	UNKNOWN	DOLOMITE
C176398		USGS		Geochemistry of rock samples from the National Geochemical Database: U.S. Geological Survey, Reston, VA.	U.S. Geological Survey	USGS		44.2811	-114.411	0.01	69	69	69	MISC	SEDIMENTARY	UNKNOWN	UNKNOWN	DOLOMITE																	40.5
C176398		USGS		Geochemistry of rock samples from the National Geochemical Database: U.S. Geological Survey, Reston, VA.	U.S. Geological Survey	USGS		44.2811	-114.411	0.01	69	69	69	XRF	SEDIMENTARY	UNKNOWN	UNKNOWN	DOLOMITE		11.8	0.04	0.95						0.15	17.5	26.6			0.26	0.12
C176399		USGS		Geochemistry of rock samples from the National Geochemical Database: U.S. Geological Survey, Reston, VA.	U.S. Geological Survey	USGS		44.285	-114.411	0.01	69	69	69	MISC	SEDIMENTARY	UNKNOWN	UNKNOWN	DOLOMITE																	28
C176399		USGS		Geochemistry of rock samples from the National Geochemical Database: U.S. Geological Survey, Reston, VA.	U.S. Geological Survey	USGS		44.285	-114.411	0.01	69	69	69	XRF	SEDIMENTARY	UNKNOWN	UNKNOWN	DOLOMITE		37.9	0.08	1.56						0.05	12.5	18.1			0.51	0.2
C206749		USGS		Geochemistry of rock samples from the National Geochemical Database: U.S. Geological Survey, Reston, VA.	U.S. Geological Survey	USGS		33.1	-110.861	0.01	55	55	55	ICPAES	SEDIMENTARY	UNKNOWN	UNKNOWN	DOLOMITE																							0.41	486	3.3	2.1	4.7		32	10
C206749		USGS		Geochemistry of rock samples from the National Geochemical Database: U.S. Geological Survey, Reston, VA.	U.S. Geological Survey	USGS		33.1	-110.861	0.01	55	55	55	ISE	SEDIMENTARY	UNKNOWN	UNKNOWN	DOLOMITE
C206749		USGS		Geochemistry of rock samples from the National Geochemical Database: U.S. Geological Survey, Reston, VA.	U.S. Geological Survey	USGS		33.1	-110.861	0.01	55	55	55	MS	SEDIMENTARY	UNKNOWN	UNKNOWN	DOLOMITE																						3.7	0.46	510	4.5	1.6	7	0.24	30	13	0.06
C206749		USGS		Geochemistry of rock samples from the National Geochemical Database: U.S. Geological Survey, Reston, VA.	U.S. Geological Survey	USGS		33.1	-110.861	0.01	55	55	55	TITR	SEDIMENTARY	UNKNOWN	UNKNOWN	DOLOMITE								0.13
CAA030		USGS		Geochemistry of rock samples from the National Geochemical Database: U.S. Geological Survey, Reston, VA.	U.S. Geological Survey	USGS		64.4333	-145.959	0.01				ES	SEDIMENTARY	UNKNOWN	UNKNOWN	DOLOMITE																							20	5000	15	20	5
CAA036		USGS		Geochemistry of rock samples from the National Geochemical Database: U.S. Geological Survey, Reston, VA.	U.S. Geological Survey	USGS		64.4003	-145.568	0.01				ES	SEDIMENTARY	UNKNOWN	UNKNOWN	DOLOMITE																							7	1500	30	20	30
CAB693		USGS		Geochemistry of rock samples from the National Geochemical Database: U.S. Geological Survey, Reston, VA.	U.S. Geological Survey	USGS		63.7694	-141.6	0.01				AAS	SEDIMENTARY	UNKNOWN	UNKNOWN	DOLOMITE																											10		20
CAB693		USGS		Geochemistry of rock samples from the National Geochemical Database: U.S. Geological Survey, Reston, VA.	U.S. Geological Survey	USGS		63.7694	-141.6	0.01				ES	SEDIMENTARY	UNKNOWN	UNKNOWN	DOLOMITE																							5	700	70	15	20
CAP553		USGS		Geochemistry of rock samples from the National Geochemical Database: U.S. Geological Survey, Reston, VA.	U.S. Geological Survey	USGS		63.0144	-143.954	0.01				AAS	SEDIMENTARY	UNKNOWN	UNKNOWN	DOLOMITE																											45		45
CAP553		USGS		Geochemistry of rock samples from the National Geochemical Database: U.S. Geological Survey, Reston, VA.	U.S. Geological Survey	USGS		63.0144	-143.954	0.01				COL	SEDIMENTARY	UNKNOWN	UNKNOWN	DOLOMITE																														10
CAP553		USGS		Geochemistry of rock samples from the National Geochemical Database: U.S. Geological Survey, Reston, VA.	U.S. Geological Survey	USGS		63.0144	-143.954	0.01				ES	SEDIMENTARY	UNKNOWN	UNKNOWN	DOLOMITE																							0.7	150	15		20
CAP567		USGS		Geochemistry of rock samples from the National Geochemical Database: U.S. Geological Survey, Reston, VA.	U.S. Geological Survey	USGS		63.0153	-143.939	0.01				AAS	SEDIMENTARY	UNKNOWN	UNKNOWN	DOLOMITE																											180		80
CAP567		USGS		Geochemistry of rock samples from the National Geochemical Database: U.S. Geological Survey, Reston, VA.	U.S. Geological Survey	USGS		63.0153	-143.939	0.01				ES	SEDIMENTARY	UNKNOWN	UNKNOWN	DOLOMITE																							7	700	50	20	150
CAS131		USGS		Geochemistry of rock samples from the National Geochemical Database: U.S. Geological Survey, Reston, VA.	U.S. Geological Survey	USGS		55.6239	-131.883	0.01				AAS	SEDIMENTARY	UNKNOWN	UNKNOWN	DOLOMITE																													85
CAS131		USGS		Geochemistry of rock samples from the National Geochemical Database: U.S. Geological Survey, Reston, VA.	U.S. Geological Survey	USGS		55.6239	-131.883	0.01				ES	SEDIMENTARY	UNKNOWN	UNKNOWN	DOLOMITE																									70	30	150
CAX671		USGS		Geochemistry of rock samples from the National Geochemical Database: U.S. Geological Survey, Reston, VA.	U.S. Geological Survey	USGS		61.5111	-142.825	0.01				AAS	SEDIMENTARY	UNKNOWN	UNKNOWN	DOLOMITE																													10
CAX671		USGS		Geochemistry of rock samples from the National Geochemical Database: U.S. Geological Survey, Reston, VA.	U.S. Geological Survey	USGS		61.5111	-142.825	0.01				COL	SEDIMENTARY	UNKNOWN	UNKNOWN	DOLOMITE																														30
CAX671		USGS		Geochemistry of rock samples from the National Geochemical Database: U.S. Geological Survey, Reston, VA.	U.S. Geological Survey	USGS		61.5111	-142.825	0.01				ES	SEDIMENTARY	UNKNOWN	UNKNOWN	DOLOMITE																							1	150	5		50
CBH103		USGS		Geochemistry of rock samples from the National Geochemical Database: U.S. Geological Survey, Reston, VA.	U.S. Geological Survey	USGS		64.7925	-144.234	0.01				ES	SEDIMENTARY	UNKNOWN	UNKNOWN	DOLOMITE																									30		15
CBH347		USGS		Geochemistry of rock samples from the National Geochemical Database: U.S. Geological Survey, Reston, VA.	U.S. Geological Survey	USGS		64.7728	-144.811	0.01				ES	SEDIMENTARY	UNKNOWN	UNKNOWN	DOLOMITE																									50	20			200
CBH374		USGS		Geochemistry of rock samples from the National Geochemical Database: U.S. Geological Survey, Reston, VA.	U.S. Geological Survey	USGS		64.795	-144.235	0.01				ES	SEDIMENTARY	UNKNOWN	UNKNOWN	DOLOMITE																							3	500	5	5	5
CBJ883		USGS		Geochemistry of rock samples from the National Geochemical Database: U.S. Geological Survey, Reston, VA.	U.S. Geological Survey	USGS		64.8586	-144.619	0.01				ES	SEDIMENTARY	UNKNOWN	UNKNOWN	DOLOMITE																									50	10
CDS164		USGS		Geochemistry of rock samples from the National Geochemical Database: U.S. Geological Survey, Reston, VA.	U.S. Geological Survey	USGS		63.4833	-153.9	0.01				AAS	SEDIMENTARY	UNKNOWN	UNKNOWN	DOLOMITE																											5		140
CDS164		USGS		Geochemistry of rock samples from the National Geochemical Database: U.S. Geological Survey, Reston, VA.	U.S. Geological Survey	USGS		63.4833	-153.9	0.01				ES	SEDIMENTARY	UNKNOWN	UNKNOWN	DOLOMITE																								30
CEC729		USGS		Geochemistry of rock samples from the National Geochemical Database: U.S. Geological Survey, Reston, VA.	U.S. Geological Survey	USGS		65.8319	-145.835	0.01				ES	SEDIMENTARY	UNKNOWN	UNKNOWN	DOLOMITE																							5	2000	30	7	20
CEJ790		USGS		Geochemistry of rock samples from the National Geochemical Database: U.S. Geological Survey, Reston, VA.	U.S. Geological Survey	USGS		65.9103	-146.951	0.01				ES	SEDIMENTARY	UNKNOWN	UNKNOWN	DOLOMITE																							5	3000	150	30	50	200			3
CEJ800		USGS		Geochemistry of rock samples from the National Geochemical Database: U.S. Geological Survey, Reston, VA.	U.S. Geological Survey	USGS		65.8022	-145.807	0.01				ES	SEDIMENTARY	UNKNOWN	UNKNOWN	DOLOMITE																							7	3000	20
CEJ823		USGS		Geochemistry of rock samples from the National Geochemical Database: U.S. Geological Survey, Reston, VA.	U.S. Geological Survey	USGS		65.8828	-146.973	0.01				ES	SEDIMENTARY	UNKNOWN	UNKNOWN	DOLOMITE																							5	1500	70	20	30	300
CEJ826		USGS		Geochemistry of rock samples from the National Geochemical Database: U.S. Geological Survey, Reston, VA.	U.S. Geological Survey	USGS		65.9083	-146.896	0.01				ES	SEDIMENTARY	UNKNOWN	UNKNOWN	DOLOMITE																							2	2000	20	7	30
CEN279		USGS		Geochemistry of rock samples from the National Geochemical Database: U.S. Geological Survey, Reston, VA.	U.S. Geological Survey	USGS		65.7339	-146.706	0.01				ES	SEDIMENTARY	UNKNOWN	UNKNOWN	DOLOMITE																							10	200	100	50	500
CEY058		USGS		Geochemistry of rock samples from the National Geochemical Database: U.S. Geological Survey, Reston, VA.	U.S. Geological Survey	USGS		65.905	-147	0.01				ES	SEDIMENTARY	UNKNOWN	UNKNOWN	DOLOMITE																							7	5000	50		20
CFB389		USGS		Geochemistry of rock samples from the National Geochemical Database: U.S. Geological Survey, Reston, VA.	U.S. Geological Survey	USGS		65.1978	-144.817	0.01				ES	SEDIMENTARY	UNKNOWN	UNKNOWN	DOLOMITE																							10	2000	1000	70	10
CJL321		USGS		Geochemistry of rock samples from the National Geochemical Database: U.S. Geological Survey, Reston, VA.	U.S. Geological Survey	USGS		55.1711	-131.594	0.01				AAS	SEDIMENTARY	UNKNOWN	UNKNOWN	DOLOMITE																												0.4	185
CJL321		USGS		Geochemistry of rock samples from the National Geochemical Database: U.S. Geological Survey, Reston, VA.	U.S. Geological Survey	USGS		55.1711	-131.594	0.01				ES	SEDIMENTARY	UNKNOWN	UNKNOWN	DOLOMITE																							3	5000	15	10			200
D101862		USGS		Geochemistry of rock samples from the National Geochemical Database: U.S. Geological Survey, Reston, VA.	U.S. Geological Survey	USGS		39.9667	-112.067	0.01	67	67	67	UNKNOWN	SEDIMENTARY	UNKNOWN	UNKNOWN	DOLOMITE		2.24	0.04	0.83		0.26		0.16		0.05	20.05	30.05		0.05	0.31	0.02						0.7	0.3	150
D115509		USGS		Geochemistry of rock samples from the National Geochemical Database: U.S. Geological Survey, Reston, VA.	U.S. Geological Survey	USGS		38.5	-105.133	0.01	69	69	69	MISC	SEDIMENTARY	UNKNOWN	UNKNOWN	DOLOMITE																	39.7
D115509		USGS		Geochemistry of rock samples from the National Geochemical Database: U.S. Geological Survey, Reston, VA.	U.S. Geological Survey	USGS		38.5	-105.133	0.01	69	69	69	UNKNOWN	SEDIMENTARY	UNKNOWN	UNKNOWN	DOLOMITE		10	0.05	1.8		3		0.02		0.62	18.4	26.6			0.02	0.02							1.4	2200	23	20	27		54
D115510		USGS		Geochemistry of rock samples from the National Geochemical Database: U.S. Geological Survey, Reston, VA.	U.S. Geological Survey	USGS		39.25	-112.25	0.01	69	68	67	MISC	SEDIMENTARY	UNKNOWN	UNKNOWN	DOLOMITE																	46.8
D115510		USGS		Geochemistry of rock samples from the National Geochemical Database: U.S. Geological Survey, Reston, VA.	U.S. Geological Survey	USGS		39.25	-112.25	0.01	69	68	67	UNKNOWN	SEDIMENTARY	UNKNOWN	UNKNOWN	DOLOMITE		0.4		0.4				0.14		0.06	22.2	31											0.15	170			0.49
D115514		USGS		Geochemistry of rock samples from the National Geochemical Database: U.S. Geological Survey, Reston, VA.	U.S. Geological Survey	USGS		40.5	-111.5	0.01	67	67	67	MISC	SEDIMENTARY	UNKNOWN	UNKNOWN	DOLOMITE																	46.4
D115514		USGS		Geochemistry of rock samples from the National Geochemical Database: U.S. Geological Survey, Reston, VA.	U.S. Geological Survey	USGS		40.5	-111.5	0.01	67	67	67	UNKNOWN	SEDIMENTARY	UNKNOWN	UNKNOWN	DOLOMITE		0.7	0.02	0.5		0.2		0.04		0.05	21.3	30.5			0.07								0.18	200		2.2
D115516		USGS		Geochemistry of rock samples from the National Geochemical Database: U.S. Geological Survey, Reston, VA.	U.S. Geological Survey	USGS		32.75	-107.25	0.01	69	69	69	MISC	SEDIMENTARY	UNKNOWN	UNKNOWN	DOLOMITE																	42.4
D115516		USGS		Geochemistry of rock samples from the National Geochemical Database: U.S. Geological Survey, Reston, VA.	U.S. Geological Survey	USGS		32.75	-107.25	0.01	69	69	69	UNKNOWN	SEDIMENTARY	UNKNOWN	UNKNOWN	DOLOMITE		8.6	0.04	0.9		0.3		0.18		0.07	18.5	27.9		0.08	0.27	0.02							0.27	170	7				47
D115519		USGS		Geochemistry of rock samples from the National Geochemical Database: U.S. Geological Survey, Reston, VA.	U.S. Geological Survey	USGS		38.5	-105	0.01	69	69	69	MISC	SEDIMENTARY	UNKNOWN	UNKNOWN	DOLOMITE																	43.2
D115519		USGS		Geochemistry of rock samples from the National Geochemical Database: U.S. Geological Survey, Reston, VA.	U.S. Geological Survey	USGS		38.5	-105	0.01	69	69	69	UNKNOWN	SEDIMENTARY	UNKNOWN	UNKNOWN	DOLOMITE		6.1	0.05	1.2		1.2		0.04		0.43	19.4	27.4			0.05	0.05							0.85	1600	10	8.6	12		54
D115525		USGS		Geochemistry of rock samples from the National Geochemical Database: U.S. Geological Survey, Reston, VA.	U.S. Geological Survey	USGS		45.5	-112.5	0.01	67	67	67	MISC	SEDIMENTARY	UNKNOWN	UNKNOWN	DOLOMITE																	46.9
D115525		USGS		Geochemistry of rock samples from the National Geochemical Database: U.S. Geological Survey, Reston, VA.	U.S. Geological Survey	USGS		45.5	-112.5	0.01	67	67	67	UNKNOWN	SEDIMENTARY	UNKNOWN	UNKNOWN	DOLOMITE		0.5		0.1		0.04		0.22		0.08	21.9	30.5											0.27	280	6.4		3.5		460		2.4
D115528		USGS		Geochemistry of rock samples from the National Geochemical Database: U.S. Geological Survey, Reston, VA.	U.S. Geological Survey	USGS		34.8833	-112.75	0.01	67	67	67	UNKNOWN	SEDIMENTARY	UNKNOWN	UNKNOWN	DOLOMITE																							2.8	1200		10	15
D115534		USGS		Geochemistry of rock samples from the National Geochemical Database: U.S. Geological Survey, Reston, VA.	U.S. Geological Survey	USGS		38.6333	-106.383	0.01	69	69	69	MISC	SEDIMENTARY	UNKNOWN	UNKNOWN	DOLOMITE																	40.2
D115534		USGS		Geochemistry of rock samples from the National Geochemical Database: U.S. Geological Survey, Reston, VA.	U.S. Geological Survey	USGS		38.6333	-106.383	0.01	69	69	69	UNKNOWN	SEDIMENTARY	UNKNOWN	UNKNOWN	DOLOMITE		12.5	0.05	0.65		0.24		0.46		0.14	18	27.3			0.21	0.06							0.42	300	6.4	3			40
D115540		USGS		Geochemistry of rock samples from the National Geochemical Database: U.S. Geological Survey, Reston, VA.	U.S. Geological Survey	USGS		34.8833	-112.75	0.01	67	67	67	UNKNOWN	SEDIMENTARY	UNKNOWN	UNKNOWN	DOLOMITE																							2.5	800		10	30
D115541		USGS		Geochemistry of rock samples from the National Geochemical Database: U.S. Geological Survey, Reston, VA.	U.S. Geological Survey	USGS		32.75	-108.25	0.01	69	69	69	MISC	SEDIMENTARY	UNKNOWN	UNKNOWN	DOLOMITE																	39.1
D115541		USGS		Geochemistry of rock samples from the National Geochemical Database: U.S. Geological Survey, Reston, VA.	U.S. Geological Survey	USGS		32.75	-108.25	0.01	69	69	69	UNKNOWN	SEDIMENTARY	UNKNOWN	UNKNOWN	DOLOMITE		8.5	0.03	0.9		0.28		0.06			1.4	50.6			0.26	0.08							0.18	190	10	2.4			39
D115543		USGS		Geochemistry of rock samples from the National Geochemical Database: U.S. Geological Survey, Reston, VA.	U.S. Geological Survey	USGS		40	-113.883	0.01	69	69	69	MISC	SEDIMENTARY	UNKNOWN	UNKNOWN	DOLOMITE																	47.2
D115543		USGS		Geochemistry of rock samples from the National Geochemical Database: U.S. Geological Survey, Reston, VA.	U.S. Geological Survey	USGS		40	-113.883	0.01	69	69	69	UNKNOWN	SEDIMENTARY	UNKNOWN	UNKNOWN	DOLOMITE		0.4		0.32				0.02		0.02	22.4	29.3			0.02	0.02							0.06	140	5.8	2.7
D115544		USGS		Geochemistry of rock samples from the National Geochemical Database: U.S. Geological Survey, Reston, VA.	U.S. Geological Survey	USGS		32.75	-108.383	0.01	69	69	69	MISC	SEDIMENTARY	UNKNOWN	UNKNOWN	DOLOMITE																	39.6
D115544		USGS		Geochemistry of rock samples from the National Geochemical Database: U.S. Geological Survey, Reston, VA.	U.S. Geological Survey	USGS		32.75	-108.383	0.01	69	69	69	UNKNOWN	SEDIMENTARY	UNKNOWN	UNKNOWN	DOLOMITE		20.7	0.09	1.5		0.35		0.5		0.36	13.7	21.5			0.39	0.38							0.53	700	8	2.8	1.2		270		1
D115548		USGS		Geochemistry of rock samples from the National Geochemical Database: U.S. Geological Survey, Reston, VA.	U.S. Geological Survey	USGS		41.5	-111.883	0.01	67	67	67	MISC	SEDIMENTARY	UNKNOWN	UNKNOWN	DOLOMITE																	43.4
D115548		USGS		Geochemistry of rock samples from the National Geochemical Database: U.S. Geological Survey, Reston, VA.	U.S. Geological Survey	USGS		41.5	-111.883	0.01	67	67	67	UNKNOWN	SEDIMENTARY	UNKNOWN	UNKNOWN	DOLOMITE		6	0.04	0.55				0.12		0.02	20.6	28.5		1.4	0.27	0.12							0.15	130		1.4	0.52		43
D115550		USGS		Geochemistry of rock samples from the National Geochemical Database: U.S. Geological Survey, Reston, VA.	U.S. Geological Survey	USGS		38.5	-105.133	0.01	69	69	69	MISC	SEDIMENTARY	UNKNOWN	UNKNOWN	DOLOMITE																	44.4
D115550		USGS		Geochemistry of rock samples from the National Geochemical Database: U.S. Geological Survey, Reston, VA.	U.S. Geological Survey	USGS		38.5	-105.133	0.01	69	69	69	UNKNOWN	SEDIMENTARY	UNKNOWN	UNKNOWN	DOLOMITE		4.4	0.04	0.7		0.16		0.22		0.14	19.6	27.6		2.4	0.19	0.03							0.54	260	12	2.6	1.7		38
D115573		USGS		Geochemistry of rock samples from the National Geochemical Database: U.S. Geological Survey, Reston, VA.	U.S. Geological Survey	USGS		41.5	-111.883	0.01	67	67	67	MISC	SEDIMENTARY	UNKNOWN	UNKNOWN	DOLOMITE																	43.2
D115573		USGS		Geochemistry of rock samples from the National Geochemical Database: U.S. Geological Survey, Reston, VA.	U.S. Geological Survey	USGS		41.5	-111.883	0.01	67	67	67	UNKNOWN	SEDIMENTARY	UNKNOWN	UNKNOWN	DOLOMITE		6	0.02	0.2		0.06		0.12		0.05	19	28.7			0.27	0.13							0.12	92			0.62		31
D115581		USGS		Geochemistry of rock samples from the National Geochemical Database: U.S. Geological Survey, Reston, VA.	U.S. Geological Survey	USGS		43.3833	-108.133	0.01	67	67	67	UNKNOWN	SEDIMENTARY	UNKNOWN	UNKNOWN	DOLOMITE																							1.1	150			7
D115609		USGS		Geochemistry of rock samples from the National Geochemical Database: U.S. Geological Survey, Reston, VA.	U.S. Geological Survey	USGS		41.5	-111.883	0.01	67	67	67	UNKNOWN	SEDIMENTARY	UNKNOWN	UNKNOWN	DOLOMITE																							2.8	450	50	15	30
D115590		USGS		Geochemistry of rock samples from the National Geochemical Database: U.S. Geological Survey, Reston, VA.	U.S. Geological Survey	USGS		40.5	-111.5	0.01	67	67	67	MISC	SEDIMENTARY	UNKNOWN	UNKNOWN	DOLOMITE																	46.9
D115590		USGS		Geochemistry of rock samples from the National Geochemical Database: U.S. Geological Survey, Reston, VA.	U.S. Geological Survey	USGS		40.5	-111.5	0.01	67	67	67	UNKNOWN	SEDIMENTARY	UNKNOWN	UNKNOWN	DOLOMITE		1		0.1		0.1		0.06		0.06	21	29.7		1.5	0.08								0.13	160	2.9		2.7		58
D115606		USGS		Geochemistry of rock samples from the National Geochemical Database: U.S. Geological Survey, Reston, VA.	U.S. Geological Survey	USGS		38.5	-105	0.01	69	69	69	MISC	SEDIMENTARY	UNKNOWN	UNKNOWN	DOLOMITE																	43.5
D115606		USGS		Geochemistry of rock samples from the National Geochemical Database: U.S. Geological Survey, Reston, VA.	U.S. Geological Survey	USGS		38.5	-105	0.01	69	69	69	UNKNOWN	SEDIMENTARY	UNKNOWN	UNKNOWN	DOLOMITE		6.4	0.06	1		1.4		0.06		0.74	19	28.1		0.09	0.11	0.03							0.62	1100	4.3	8	11		41
D115607		USGS		Geochemistry of rock samples from the National Geochemical Database: U.S. Geological Survey, Reston, VA.	U.S. Geological Survey	USGS		45.6333	-112.633	0.01	67	67	67	MISC	SEDIMENTARY	UNKNOWN	UNKNOWN	DOLOMITE																	45.4
D115607		USGS		Geochemistry of rock samples from the National Geochemical Database: U.S. Geological Survey, Reston, VA.	U.S. Geological Survey	USGS		45.6333	-112.633	0.01	67	67	67	UNKNOWN	SEDIMENTARY	UNKNOWN	UNKNOWN	DOLOMITE		2.5	0.05	1.2		0.16		0.54		0.07	21.2	30.3			0.1								0.29	170	2.4
D115608		USGS		Geochemistry of rock samples from the National Geochemical Database: U.S. Geological Survey, Reston, VA.	U.S. Geological Survey	USGS		37.25	-115.25	0.01	67	67	67	MISC	SEDIMENTARY	UNKNOWN	UNKNOWN	DOLOMITE																	46.8
D115608		USGS		Geochemistry of rock samples from the National Geochemical Database: U.S. Geological Survey, Reston, VA.	U.S. Geological Survey	USGS		37.25	-115.25	0.01	67	67	67	UNKNOWN	SEDIMENTARY	UNKNOWN	UNKNOWN	DOLOMITE		0.4	0.01	0.1		0.03		0.02		0.01	21	30.1		0.9	0.07	0.04								37					35
D115620		USGS		Geochemistry of rock samples from the National Geochemical Database: U.S. Geological Survey, Reston, VA.	U.S. Geological Survey	USGS		45.6333	-112.633	0.01	67	67	67	MISC	SEDIMENTARY	UNKNOWN	UNKNOWN	DOLOMITE																	45.8
D115620		USGS		Geochemistry of rock samples from the National Geochemical Database: U.S. Geological Survey, Reston, VA.	U.S. Geological Survey	USGS		45.6333	-112.633	0.01	67	67	67	UNKNOWN	SEDIMENTARY	UNKNOWN	UNKNOWN	DOLOMITE		1.4	0.03	1.1		0.28		0.44		0.11	20.6	28.6		3	0.08								0.44	290	2.1		0.45		130
D115623		USGS		Geochemistry of rock samples from the National Geochemical Database: U.S. Geological Survey, Reston, VA.	U.S. Geological Survey	USGS		37.25	-115.25	0.01	67	67	67	MISC	SEDIMENTARY	UNKNOWN	UNKNOWN	DOLOMITE																	46.5
D115623		USGS		Geochemistry of rock samples from the National Geochemical Database: U.S. Geological Survey, Reston, VA.	U.S. Geological Survey	USGS		37.25	-115.25	0.01	67	67	67	UNKNOWN	SEDIMENTARY	UNKNOWN	UNKNOWN	DOLOMITE		1.7	0.04	0.48		0.16		0.04		0.05	21	29.2		0.08	0.11								0.15	160	2.2		0.71		64
D115631		USGS		Geochemistry of rock samples from the National Geochemical Database: U.S. Geological Survey, Reston, VA.	U.S. Geological Survey	USGS		44	-103.25	0.01	69	68	67	MISC	SEDIMENTARY	UNKNOWN	UNKNOWN	DOLOMITE																	34.3
D115631		USGS		Geochemistry of rock samples from the National Geochemical Database: U.S. Geological Survey, Reston, VA.	U.S. Geological Survey	USGS		44	-103.25	0.01	69	68	67	UNKNOWN	SEDIMENTARY	UNKNOWN	UNKNOWN	DOLOMITE		18.4	0.21	3.7		2.6		4.3		0.89	11.5	23.1			1.6	0.13							2.5	4100	12	18	10		88
D115640		USGS		Geochemistry of rock samples from the National Geochemical Database: U.S. Geological Survey, Reston, VA.	U.S. Geological Survey	USGS		45.6333	-112.633	0.01	67	67	67	MISC	SEDIMENTARY	UNKNOWN	UNKNOWN	DOLOMITE																	45.7
D115640		USGS		Geochemistry of rock samples from the National Geochemical Database: U.S. Geological Survey, Reston, VA.	U.S. Geological Survey	USGS		45.6333	-112.633	0.01	67	67	67	UNKNOWN	SEDIMENTARY	UNKNOWN	UNKNOWN	DOLOMITE		2.3	0.02	0.5		0.2		0.52		0.07	20.1	30.7		0.12	0.16								0.41	230		2.1
D115642		USGS		Geochemistry of rock samples from the National Geochemical Database: U.S. Geological Survey, Reston, VA.	U.S. Geological Survey	USGS		32.75	-108.383	0.01	69	69	69	MISC	SEDIMENTARY	UNKNOWN	UNKNOWN	DOLOMITE																	41
D115642		USGS		Geochemistry of rock samples from the National Geochemical Database: U.S. Geological Survey, Reston, VA.	U.S. Geological Survey	USGS		32.75	-108.383	0.01	69	69	69	UNKNOWN	SEDIMENTARY	UNKNOWN	UNKNOWN	DOLOMITE		11.9	0.08	0.9		0.3		0.58		0.3	18.6	26			0.27	0.02							0.47	530	2.2		0.64		260
D115661		USGS		Geochemistry of rock samples from the National Geochemical Database: U.S. Geological Survey, Reston, VA.	U.S. Geological Survey	USGS		45.6333	-112.633	0.01	67	67	67	MISC	SEDIMENTARY	UNKNOWN	UNKNOWN	DOLOMITE																	46.6
D115661		USGS		Geochemistry of rock samples from the National Geochemical Database: U.S. Geological Survey, Reston, VA.	U.S. Geological Survey	USGS		45.6333	-112.633	0.01	67	67	67	UNKNOWN	SEDIMENTARY	UNKNOWN	UNKNOWN	DOLOMITE		0.6	0.02	0.3		0.22		0.38		0.09	21.3	31.6			0.11								0.32	150	6.8
D115663		USGS		Geochemistry of rock samples from the National Geochemical Database: U.S. Geological Survey, Reston, VA.	U.S. Geological Survey	USGS		38.5	-105.133	0.01	69	69	69	MISC	SEDIMENTARY	UNKNOWN	UNKNOWN	DOLOMITE																	42.4
D115663		USGS		Geochemistry of rock samples from the National Geochemical Database: U.S. Geological Survey, Reston, VA.	U.S. Geological Survey	USGS		38.5	-105.133	0.01	69	69	69	UNKNOWN	SEDIMENTARY	UNKNOWN	UNKNOWN	DOLOMITE		5.8	0.09	1.1		1.2		0.1		0.78	18.8	27.4			1.3	0.07							0.63	1500	3.9	5.3	30
D115669		USGS		Geochemistry of rock samples from the National Geochemical Database: U.S. Geological Survey, Reston, VA.	U.S. Geological Survey	USGS		38.5	-105.133	0.01	69	69	69	MISC	SEDIMENTARY	UNKNOWN	UNKNOWN	DOLOMITE																	42.3
D115669		USGS		Geochemistry of rock samples from the National Geochemical Database: U.S. Geological Survey, Reston, VA.	U.S. Geological Survey	USGS		38.5	-105.133	0.01	69	69	69	UNKNOWN	SEDIMENTARY	UNKNOWN	UNKNOWN	DOLOMITE		7.8	0.1	1.4		1.1		0.1		0.84	19.3	27.1		0.12	0.17	0.06							0.65	1700	4	7	9.1		50
D115670		USGS		Geochemistry of rock samples from the National Geochemical Database: U.S. Geological Survey, Reston, VA.	U.S. Geological Survey	USGS		38.5	-105.133	0.01	69	69	69	MISC	SEDIMENTARY	UNKNOWN	UNKNOWN	DOLOMITE																	39.5
D115670		USGS		Geochemistry of rock samples from the National Geochemical Database: U.S. Geological Survey, Reston, VA.	U.S. Geological Survey	USGS		38.5	-105.133	0.01	69	69	69	UNKNOWN	SEDIMENTARY	UNKNOWN	UNKNOWN	DOLOMITE		11.4	0.07	0.7		3.5		0.06		1.1	17.5	25.9		0.1	0.05	0.02							1.6	2300	14	20	24		53
D115681		USGS		Geochemistry of rock samples from the National Geochemical Database: U.S. Geological Survey, Reston, VA.	U.S. Geological Survey	USGS		34.8833	-112.75	0.01	67	67	67	UNKNOWN	SEDIMENTARY	UNKNOWN	UNKNOWN	DOLOMITE																							2.9	800		10	30
D115687		USGS		Geochemistry of rock samples from the National Geochemical Database: U.S. Geological Survey, Reston, VA.	U.S. Geological Survey	USGS		34.8833	-112.75	0.01	67	67	67	UNKNOWN	SEDIMENTARY	UNKNOWN	UNKNOWN	DOLOMITE																							3.1	1300		10	20
D115707		USGS		Geochemistry of rock samples from the National Geochemical Database: U.S. Geological Survey, Reston, VA.	U.S. Geological Survey	USGS		41.6333	-111.633	0.01	67	67	67	MISC	SEDIMENTARY	UNKNOWN	UNKNOWN	DOLOMITE																	46.9
D115707		USGS		Geochemistry of rock samples from the National Geochemical Database: U.S. Geological Survey, Reston, VA.	U.S. Geological Survey	USGS		41.6333	-111.633	0.01	67	67	67	UNKNOWN	SEDIMENTARY	UNKNOWN	UNKNOWN	DOLOMITE		0.66	0.05	0.24		0.82				0.1	27.6	21.5		0.08	0.89	0.05								23
D115715		USGS		Geochemistry of rock samples from the National Geochemical Database: U.S. Geological Survey, Reston, VA.	U.S. Geological Survey	USGS		37.25	-115.25	0.01	67	67	67	UNKNOWN	SEDIMENTARY	UNKNOWN	UNKNOWN	DOLOMITE		0.4	0.01	0.1		0.15		0.04		0.04	21.7	30.5			0.07	0.04								28
D115715		USGS		Geochemistry of rock samples from the National Geochemical Database: U.S. Geological Survey, Reston, VA.	U.S. Geological Survey	USGS		37.25	-115.25	0.01	67	67	67	MISC	SEDIMENTARY	UNKNOWN	UNKNOWN	DOLOMITE																	46.6
D115721		USGS		Geochemistry of rock samples from the National Geochemical Database: U.S. Geological Survey, Reston, VA.	U.S. Geological Survey	USGS		32.75	-108.25	0.01	69	69	69	MISC	SEDIMENTARY	UNKNOWN	UNKNOWN	DOLOMITE																	44.7
D115721		USGS		Geochemistry of rock samples from the National Geochemical Database: U.S. Geological Survey, Reston, VA.	U.S. Geological Survey	USGS		32.75	-108.25	0.01	69	69	69	UNKNOWN	SEDIMENTARY	UNKNOWN	UNKNOWN	DOLOMITE		4.6	0.02	0.37		0.87		0.12		0.23	19.8	28.2		0.08	0.05								0.48	630	2.1		4.6		390
D115728		USGS		Geochemistry of rock samples from the National Geochemical Database: U.S. Geological Survey, Reston, VA.	U.S. Geological Survey	USGS		40	-113.883	0.01	69	69	69	MISC	SEDIMENTARY	UNKNOWN	UNKNOWN	DOLOMITE																	46.7
D115728		USGS		Geochemistry of rock samples from the National Geochemical Database: U.S. Geological Survey, Reston, VA.	U.S. Geological Survey	USGS		40	-113.883	0.01	69	69	69	UNKNOWN	SEDIMENTARY	UNKNOWN	UNKNOWN	DOLOMITE		0.5		0.5				0.08			20.5	30.5		1.5	0.53	0.51							0.056	130		2.4	0.71		56
D115734		USGS		Geochemistry of rock samples from the National Geochemical Database: U.S. Geological Survey, Reston, VA.	U.S. Geological Survey	USGS		44	-103.25	0.01	69	68	67	MISC	SEDIMENTARY	UNKNOWN	UNKNOWN	DOLOMITE																	34.4
D115734		USGS		Geochemistry of rock samples from the National Geochemical Database: U.S. Geological Survey, Reston, VA.	U.S. Geological Survey	USGS		44	-103.25	0.01	69	68	67	UNKNOWN	SEDIMENTARY	UNKNOWN	UNKNOWN	DOLOMITE		18.8	0.2	3.1		2.6		4.3		1	11	21.5			1.5	0.15							1.6	4000	10	10	8.3
D115742		USGS		Geochemistry of rock samples from the National Geochemical Database: U.S. Geological Survey, Reston, VA.	U.S. Geological Survey	USGS		38.6333	-106.383	0.01	69	69	69	MISC	SEDIMENTARY	UNKNOWN	UNKNOWN	DOLOMITE																	45.9
D115742		USGS		Geochemistry of rock samples from the National Geochemical Database: U.S. Geological Survey, Reston, VA.	U.S. Geological Survey	USGS		38.6333	-106.383	0.01	69	69	69	UNKNOWN	SEDIMENTARY	UNKNOWN	UNKNOWN	DOLOMITE		1	0.02	0.6		0.01		0.16		0.08	20.6	30.3		1.7	0.13								0.16	360	2.2		0.45		57
D115748		USGS		Geochemistry of rock samples from the National Geochemical Database: U.S. Geological Survey, Reston, VA.	U.S. Geological Survey	USGS		32.75	-108.383	0.01	69	69	69	MISC	SEDIMENTARY	UNKNOWN	UNKNOWN	DOLOMITE																	41.2
D115748		USGS		Geochemistry of rock samples from the National Geochemical Database: U.S. Geological Survey, Reston, VA.	U.S. Geological Survey	USGS		32.75	-108.383	0.01	69	69	69	UNKNOWN	SEDIMENTARY	UNKNOWN	UNKNOWN	DOLOMITE		11.9	0.08	1.6		0.46		0.58		0.18	17.2	27.4			0.19	0.05							0.54	600			0.88		280
D115760		USGS		Geochemistry of rock samples from the National Geochemical Database: U.S. Geological Survey, Reston, VA.	U.S. Geological Survey	USGS		40.1333	-111.5	0.01	67	67	67	MISC	SEDIMENTARY	UNKNOWN	UNKNOWN	DOLOMITE																	46.1
D115796		USGS		Geochemistry of rock samples from the National Geochemical Database: U.S. Geological Survey, Reston, VA.	U.S. Geological Survey	USGS		41.5	-111.883	0.01	67	67	67	UNKNOWN	SEDIMENTARY	UNKNOWN	UNKNOWN	DOLOMITE																							5.1	570	50	15	10
D115760		USGS		Geochemistry of rock samples from the National Geochemical Database: U.S. Geological Survey, Reston, VA.	U.S. Geological Survey	USGS		40.1333	-111.5	0.01	67	67	67	UNKNOWN	SEDIMENTARY	UNKNOWN	UNKNOWN	DOLOMITE		0.4	0.02	0.4		0.09		0.06		0.04	21.5	32.5			0.12								0.097	240	2.4
D115763		USGS		Geochemistry of rock samples from the National Geochemical Database: U.S. Geological Survey, Reston, VA.	U.S. Geological Survey	USGS		38.6333	-106.383	0.01	69	69	69	MISC	SEDIMENTARY	UNKNOWN	UNKNOWN	DOLOMITE																	45.8
D115763		USGS		Geochemistry of rock samples from the National Geochemical Database: U.S. Geological Survey, Reston, VA.	U.S. Geological Survey	USGS		38.6333	-106.383	0.01	69	69	69	UNKNOWN	SEDIMENTARY	UNKNOWN	UNKNOWN	DOLOMITE		1	0.04	0.6		0.15		0.08		0.08	20.7	31.3			0.15								0.14	360	2.1	2.1			55
D115764		USGS		Geochemistry of rock samples from the National Geochemical Database: U.S. Geological Survey, Reston, VA.	U.S. Geological Survey	USGS		41.6333	-111.633	0.01	67	67	67	MISC	SEDIMENTARY	UNKNOWN	UNKNOWN	DOLOMITE																	46.4
D115764		USGS		Geochemistry of rock samples from the National Geochemical Database: U.S. Geological Survey, Reston, VA.	U.S. Geological Survey	USGS		41.6333	-111.633	0.01	67	67	67	UNKNOWN	SEDIMENTARY	UNKNOWN	UNKNOWN	DOLOMITE		0.6	0.03	0.6		0.06		0.04		0.01	22.1	31.5			0.16									37		1.1
D115770		USGS		Geochemistry of rock samples from the National Geochemical Database: U.S. Geological Survey, Reston, VA.	U.S. Geological Survey	USGS		40.5	-111.5	0.01	67	67	67	MISC	SEDIMENTARY	UNKNOWN	UNKNOWN	DOLOMITE																	46.8
D115770		USGS		Geochemistry of rock samples from the National Geochemical Database: U.S. Geological Survey, Reston, VA.	U.S. Geological Survey	USGS		40.5	-111.5	0.01	67	67	67	UNKNOWN	SEDIMENTARY	UNKNOWN	UNKNOWN	DOLOMITE		0.5	0.02	0.3		0.12		0.05		0.03	21.3	31.3			0.18								0.13	180		1.2			33
D115773		USGS		Geochemistry of rock samples from the National Geochemical Database: U.S. Geological Survey, Reston, VA.	U.S. Geological Survey	USGS		45.6333	-112.633	0.01	67	67	67	MISC	SEDIMENTARY	UNKNOWN	UNKNOWN	DOLOMITE																	46.2
D115773		USGS		Geochemistry of rock samples from the National Geochemical Database: U.S. Geological Survey, Reston, VA.	U.S. Geological Survey	USGS		45.6333	-112.633	0.01	67	67	67	UNKNOWN	SEDIMENTARY	UNKNOWN	UNKNOWN	DOLOMITE		1.4	0.02	0.3		0.1		0.46		0.06	20.9	29.9			0.1								0.41	280		1.4
D115776		USGS		Geochemistry of rock samples from the National Geochemical Database: U.S. Geological Survey, Reston, VA.	U.S. Geological Survey	USGS		32.75	-108.25	0.01	69	69	69	MISC	SEDIMENTARY	UNKNOWN	UNKNOWN	DOLOMITE																	39.5
D115776		USGS		Geochemistry of rock samples from the National Geochemical Database: U.S. Geological Survey, Reston, VA.	U.S. Geological Survey	USGS		32.75	-108.25	0.01	69	69	69	UNKNOWN	SEDIMENTARY	UNKNOWN	UNKNOWN	DOLOMITE		7.6	0.04	0.42		0.34		0.06		0.01	1.2	49.3			0.31	0.07							0.2	310			0.54		130
D115784		USGS		Geochemistry of rock samples from the National Geochemical Database: U.S. Geological Survey, Reston, VA.	U.S. Geological Survey	USGS		40	-113.883	0.01	67	67	67	MISC	SEDIMENTARY	UNKNOWN	UNKNOWN	DOLOMITE																	43.7
D115784		USGS		Geochemistry of rock samples from the National Geochemical Database: U.S. Geological Survey, Reston, VA.	U.S. Geological Survey	USGS		40	-113.883	0.01	67	67	67	UNKNOWN	SEDIMENTARY	UNKNOWN	UNKNOWN	DOLOMITE		4.2	0.07	0.7		0.27		0.18		0.01	20.4	28.5			0.88	0.01							0.32	130		2.3	0.59
D115793		USGS		Geochemistry of rock samples from the National Geochemical Database: U.S. Geological Survey, Reston, VA.	U.S. Geological Survey	USGS		32.75	-107.25	0.01	69	69	69	MISC	SEDIMENTARY	UNKNOWN	UNKNOWN	DOLOMITE																	38.6
D115793		USGS		Geochemistry of rock samples from the National Geochemical Database: U.S. Geological Survey, Reston, VA.	U.S. Geological Survey	USGS		32.75	-107.25	0.01	69	69	69	UNKNOWN	SEDIMENTARY	UNKNOWN	UNKNOWN	DOLOMITE		17.2	0.02	0.6		0.31		0.24		0.04	17.1	25.7			0.15								0.39	300	2.2	2.7	0.54		44
D115794		USGS		Geochemistry of rock samples from the National Geochemical Database: U.S. Geological Survey, Reston, VA.	U.S. Geological Survey	USGS		36	-111.883	0.01	67	67	67	MISC	SEDIMENTARY	UNKNOWN	UNKNOWN	DOLOMITE																	41.7
D115794		USGS		Geochemistry of rock samples from the National Geochemical Database: U.S. Geological Survey, Reston, VA.	U.S. Geological Survey	USGS		36	-111.883	0.01	67	67	67	UNKNOWN	SEDIMENTARY	UNKNOWN	UNKNOWN	DOLOMITE		7.2	0.12	1.4		1.5		1.9		0.43	18	26.1		2.3	0.72	0.02							1.4	1300	4.3	3	1.6
D115818		USGS		Geochemistry of rock samples from the National Geochemical Database: U.S. Geological Survey, Reston, VA.	U.S. Geological Survey	USGS		38.5	-105	0.01	69	69	69	MISC	SEDIMENTARY	UNKNOWN	UNKNOWN	DOLOMITE																	40.7
D115818		USGS		Geochemistry of rock samples from the National Geochemical Database: U.S. Geological Survey, Reston, VA.	U.S. Geological Survey	USGS		38.5	-105	0.01	69	69	69	UNKNOWN	SEDIMENTARY	UNKNOWN	UNKNOWN	DOLOMITE		10.1	0.05	0.6		1.6		0.02		0.56	18.5	27.3		0.9	0.07	0.02							0.81	1700	2.8	5	11		42
D115823		USGS		Geochemistry of rock samples from the National Geochemical Database: U.S. Geological Survey, Reston, VA.	U.S. Geological Survey	USGS		37.25	-115.25	0.01	67	67	67	MISC	SEDIMENTARY	UNKNOWN	UNKNOWN	DOLOMITE																	45.4
D115823		USGS		Geochemistry of rock samples from the National Geochemical Database: U.S. Geological Survey, Reston, VA.	U.S. Geological Survey	USGS		37.25	-115.25	0.01	67	67	67	UNKNOWN	SEDIMENTARY	UNKNOWN	UNKNOWN	DOLOMITE		2.8	0.02	0.29		0.12		0.02		0.04	20.2	30.4		0.08	0.03	0.2							0.075	210
D115829		USGS		Geochemistry of rock samples from the National Geochemical Database: U.S. Geological Survey, Reston, VA.	U.S. Geological Survey	USGS		32.75	-107.25	0.01	69	69	69	MISC	SEDIMENTARY	UNKNOWN	UNKNOWN	DOLOMITE																	42.9
D115829		USGS		Geochemistry of rock samples from the National Geochemical Database: U.S. Geological Survey, Reston, VA.	U.S. Geological Survey	USGS		32.75	-107.25	0.01	69	69	69	UNKNOWN	SEDIMENTARY	UNKNOWN	UNKNOWN	DOLOMITE		9	0.05	0.7		0.33		0.22		0.03	17.8	28.7		1.3	0.27	0.02							0.26	190	2.9		0.66		50
D115843		USGS		Geochemistry of rock samples from the National Geochemical Database: U.S. Geological Survey, Reston, VA.	U.S. Geological Survey	USGS		32.75	-108.25	0.01	69	69	69	MISC	SEDIMENTARY	UNKNOWN	UNKNOWN	DOLOMITE																	44.9
D115843		USGS		Geochemistry of rock samples from the National Geochemical Database: U.S. Geological Survey, Reston, VA.	U.S. Geological Survey	USGS		32.75	-108.25	0.01	69	69	69	UNKNOWN	SEDIMENTARY	UNKNOWN	UNKNOWN	DOLOMITE		4.3	0.02	0.4		0.85		0.06		0.2	20	28.6		0.08	0.04	0.03							0.48	560		1.1	1.3		410
D115869		USGS		Geochemistry of rock samples from the National Geochemical Database: U.S. Geological Survey, Reston, VA.	U.S. Geological Survey	USGS		39.25	-112.133	0.01	69	68	67	MISC	SEDIMENTARY	UNKNOWN	UNKNOWN	DOLOMITE																	46.4
D115869		USGS		Geochemistry of rock samples from the National Geochemical Database: U.S. Geological Survey, Reston, VA.	U.S. Geological Survey	USGS		39.25	-112.133	0.01	69	68	67	UNKNOWN	SEDIMENTARY	UNKNOWN	UNKNOWN	DOLOMITE		1.2	0.02	0.4		0.02		0.08		0.02	21.3	30.9			0.15								0.059	72			0.62		44
D115871		USGS		Geochemistry of rock samples from the National Geochemical Database: U.S. Geological Survey, Reston, VA.	U.S. Geological Survey	USGS		39.25	-112.133	0.01	69	68	67	MISC	SEDIMENTARY	UNKNOWN	UNKNOWN	DOLOMITE																	46
D115871		USGS		Geochemistry of rock samples from the National Geochemical Database: U.S. Geological Survey, Reston, VA.	U.S. Geological Survey	USGS		39.25	-112.133	0.01	69	68	67	UNKNOWN	SEDIMENTARY	UNKNOWN	UNKNOWN	DOLOMITE		2.3	0.03	0.75				0.1			20.1	31.8			0.17								0.14	99					36
D115874		USGS		Geochemistry of rock samples from the National Geochemical Database: U.S. Geological Survey, Reston, VA.	U.S. Geological Survey	USGS		40.5	-111.5	0.01	67	67	67	MISC	SEDIMENTARY	UNKNOWN	UNKNOWN	DOLOMITE																	46.7
D115874		USGS		Geochemistry of rock samples from the National Geochemical Database: U.S. Geological Survey, Reston, VA.	U.S. Geological Survey	USGS		40.5	-111.5	0.01	67	67	67	UNKNOWN	SEDIMENTARY	UNKNOWN	UNKNOWN	DOLOMITE		1.1	0.02	0.4		0.15		0.06		0.03	20.9	29.8			0.17								0.12	170			0.74		62
D115877		USGS		Geochemistry of rock samples from the National Geochemical Database: U.S. Geological Survey, Reston, VA.	U.S. Geological Survey	USGS		38.6333	-106.383	0.01	69	69	69	MISC	SEDIMENTARY	UNKNOWN	UNKNOWN	DOLOMITE																	40.5
D115877		USGS		Geochemistry of rock samples from the National Geochemical Database: U.S. Geological Survey, Reston, VA.	U.S. Geological Survey	USGS		38.6333	-106.383	0.01	69	69	69	UNKNOWN	SEDIMENTARY	UNKNOWN	UNKNOWN	DOLOMITE		12.7	0.05	0.6		0.3		0.5		0.07	17.9	25.6			0.27	0.06							0.35	290	2.4	2.4			72
D115879		USGS		Geochemistry of rock samples from the National Geochemical Database: U.S. Geological Survey, Reston, VA.	U.S. Geological Survey	USGS		32.75	-108.383	0.01	69	69	69	MISC	SEDIMENTARY	UNKNOWN	UNKNOWN	DOLOMITE																	36.4
D115879		USGS		Geochemistry of rock samples from the National Geochemical Database: U.S. Geological Survey, Reston, VA.	U.S. Geological Survey	USGS		32.75	-108.383	0.01	69	69	69	UNKNOWN	SEDIMENTARY	UNKNOWN	UNKNOWN	DOLOMITE		21.3	0.12	1.3		0.25		0.5		0.18	17.1	23.3			0.17	0.36							0.38	470		1.4	0.89		220
D115892		USGS		Geochemistry of rock samples from the National Geochemical Database: U.S. Geological Survey, Reston, VA.	U.S. Geological Survey	USGS		43.3833	-108.133	0.01	67	67	67	UNKNOWN	SEDIMENTARY	UNKNOWN	UNKNOWN	DOLOMITE																							1.8	200			5
D115900		USGS		Geochemistry of rock samples from the National Geochemical Database: U.S. Geological Survey, Reston, VA.	U.S. Geological Survey	USGS		39.25	-112.133	0.01	69	68	67	MISC	SEDIMENTARY	UNKNOWN	UNKNOWN	DOLOMITE																	46.7
D115898		USGS		Geochemistry of rock samples from the National Geochemical Database: U.S. Geological Survey, Reston, VA.	U.S. Geological Survey	USGS		36.6333	-115.25	0.01	67	67	67	MISC	SEDIMENTARY	UNKNOWN	UNKNOWN	DOLOMITE																	46.8
D115898		USGS		Geochemistry of rock samples from the National Geochemical Database: U.S. Geological Survey, Reston, VA.	U.S. Geological Survey	USGS		36.6333	-115.25	0.01	67	67	67	UNKNOWN	SEDIMENTARY	UNKNOWN	UNKNOWN	DOLOMITE		0.7	0.01	0.2		0.04		0.04		0.01	20.3	30.1		3.1	0.1									17
D115900		USGS		Geochemistry of rock samples from the National Geochemical Database: U.S. Geological Survey, Reston, VA.	U.S. Geological Survey	USGS		39.25	-112.133	0.01	69	68	67	UNKNOWN	SEDIMENTARY	UNKNOWN	UNKNOWN	DOLOMITE		1.1	0.02	0.2				0.08		0.01	21.1	29.7		2	0.14								0.074	66		2.6
D115911		USGS		Geochemistry of rock samples from the National Geochemical Database: U.S. Geological Survey, Reston, VA.	U.S. Geological Survey	USGS		38.5	-106.5	0.01	69	69	69	MISC	SEDIMENTARY	UNKNOWN	UNKNOWN	DOLOMITE																	42.2
D115911		USGS		Geochemistry of rock samples from the National Geochemical Database: U.S. Geological Survey, Reston, VA.	U.S. Geological Survey	USGS		38.5	-106.5	0.01	69	69	69	UNKNOWN	SEDIMENTARY	UNKNOWN	UNKNOWN	DOLOMITE		2.4	0.03	0.4				0.14		0.03	21.9	30.8			0.17								0.15	180	2		3.4		44
D115912		USGS		Geochemistry of rock samples from the National Geochemical Database: U.S. Geological Survey, Reston, VA.	U.S. Geological Survey	USGS		37.25	-115.25	0.01	67	67	67	MISC	SEDIMENTARY	UNKNOWN	UNKNOWN	DOLOMITE																	40.9
D115912		USGS		Geochemistry of rock samples from the National Geochemical Database: U.S. Geological Survey, Reston, VA.	U.S. Geological Survey	USGS		37.25	-115.25	0.01	67	67	67	UNKNOWN	SEDIMENTARY	UNKNOWN	UNKNOWN	DOLOMITE		1.4	0.04	0.1		0.6		0.06		0.03	21.7	32.9			0.1	0.2							0.3	89	2		0.97		47
D115918		USGS		Geochemistry of rock samples from the National Geochemical Database: U.S. Geological Survey, Reston, VA.	U.S. Geological Survey	USGS		40	-113.883	0.01	67	67	67	MISC	SEDIMENTARY	UNKNOWN	UNKNOWN	DOLOMITE																	43.2
D115918		USGS		Geochemistry of rock samples from the National Geochemical Database: U.S. Geological Survey, Reston, VA.	U.S. Geological Survey	USGS		40	-113.883	0.01	67	67	67	UNKNOWN	SEDIMENTARY	UNKNOWN	UNKNOWN	DOLOMITE		4.2	0.1	0.6		0.25		0.2		0.01	20.2	28.6			0.62	0.03							0.3	140		4.6	0.78		40
D115921		USGS		Geochemistry of rock samples from the National Geochemical Database: U.S. Geological Survey, Reston, VA.	U.S. Geological Survey	USGS		38.6333	-106.383	0.01	69	69	69	MISC	SEDIMENTARY	UNKNOWN	UNKNOWN	DOLOMITE																	46.2
D115921		USGS		Geochemistry of rock samples from the National Geochemical Database: U.S. Geological Survey, Reston, VA.	U.S. Geological Survey	USGS		38.6333	-106.383	0.01	69	69	69	UNKNOWN	SEDIMENTARY	UNKNOWN	UNKNOWN	DOLOMITE		0.4	0.02	0.1		0.03		0.12		0.01	21.3	30.8		0.42	0.11								0.15	220	2.4	2.5	0.92		34
D115929		USGS		Geochemistry of rock samples from the National Geochemical Database: U.S. Geological Survey, Reston, VA.	U.S. Geological Survey	USGS		45.6333	-112.633	0.01	67	67	67	MISC	SEDIMENTARY	UNKNOWN	UNKNOWN	DOLOMITE																	46.7
D115929		USGS		Geochemistry of rock samples from the National Geochemical Database: U.S. Geological Survey, Reston, VA.	U.S. Geological Survey	USGS		45.6333	-112.633	0.01	67	67	67	UNKNOWN	SEDIMENTARY	UNKNOWN	UNKNOWN	DOLOMITE		0.3	0.02	0.1		0.17		0.38		0.03	21.3	30			0.11	0.02							0.43	250					56
D115936		USGS		Geochemistry of rock samples from the National Geochemical Database: U.S. Geological Survey, Reston, VA.	U.S. Geological Survey	USGS		39.8833	-113.75	0.01	67	67	67	MISC	SEDIMENTARY	UNKNOWN	UNKNOWN	DOLOMITE																	47.3
D115936		USGS		Geochemistry of rock samples from the National Geochemical Database: U.S. Geological Survey, Reston, VA.	U.S. Geological Survey	USGS		39.8833	-113.75	0.01	67	67	67	UNKNOWN	SEDIMENTARY	UNKNOWN	UNKNOWN	DOLOMITE		0.6	0.02	0.1		0.01		0.04		0.01	21.3	30.1			0.11	0.01							0.059	54					45
D115937		USGS		Geochemistry of rock samples from the National Geochemical Database: U.S. Geological Survey, Reston, VA.	U.S. Geological Survey	USGS		38.6333	-106.383	0.01	69	69	69	MISC	SEDIMENTARY	UNKNOWN	UNKNOWN	DOLOMITE																	47.1
D115937		USGS		Geochemistry of rock samples from the National Geochemical Database: U.S. Geological Survey, Reston, VA.	U.S. Geological Survey	USGS		38.6333	-106.383	0.01	69	69	69	UNKNOWN	SEDIMENTARY	UNKNOWN	UNKNOWN	DOLOMITE		0.6	0.02	0.2		0.01		0.14		0.02	21.4	31.5			0.14								0.16	200	2.6	3.1	0.81
D115938		USGS		Geochemistry of rock samples from the National Geochemical Database: U.S. Geological Survey, Reston, VA.	U.S. Geological Survey	USGS		38.5	-105	0.01	69	69	69	MISC	SEDIMENTARY	UNKNOWN	UNKNOWN	DOLOMITE																	40.9
D115938		USGS		Geochemistry of rock samples from the National Geochemical Database: U.S. Geological Survey, Reston, VA.	U.S. Geological Survey	USGS		38.5	-105	0.01	69	69	69	UNKNOWN	SEDIMENTARY	UNKNOWN	UNKNOWN	DOLOMITE		9	0.05	0.2		1.5		0.02		0.6	18.7	26.2		1.5	0.11	0.03							0.94	2300	3.1	6.9	12		52		1.2
D115939		USGS		Geochemistry of rock samples from the National Geochemical Database: U.S. Geological Survey, Reston, VA.	U.S. Geological Survey	USGS		45.5	-112.5	0.01	67	67	67	MISC	SEDIMENTARY	UNKNOWN	UNKNOWN	DOLOMITE																	46.3
D115939		USGS		Geochemistry of rock samples from the National Geochemical Database: U.S. Geological Survey, Reston, VA.	U.S. Geological Survey	USGS		45.5	-112.5	0.01	67	67	67	UNKNOWN	SEDIMENTARY	UNKNOWN	UNKNOWN	DOLOMITE		0.6	0.01	0.1		0.25		0.2		0.06	21.4	31.7		0.5	0.1	0.01							0.29	300		2.7	3.4		540		2.8
D115940		USGS		Geochemistry of rock samples from the National Geochemical Database: U.S. Geological Survey, Reston, VA.	U.S. Geological Survey	USGS		39.8833	-113.75	0.01	67	67	67	MISC	SEDIMENTARY	UNKNOWN	UNKNOWN	DOLOMITE																	47.3
D115940		USGS		Geochemistry of rock samples from the National Geochemical Database: U.S. Geological Survey, Reston, VA.	U.S. Geological Survey	USGS		39.8833	-113.75	0.01	67	67	67	UNKNOWN	SEDIMENTARY	UNKNOWN	UNKNOWN	DOLOMITE		0.7		0.4		0.11		0.04			20.5	30.5		1.1	0.1								0.066	51			0.55		48
D115942		USGS		Geochemistry of rock samples from the National Geochemical Database: U.S. Geological Survey, Reston, VA.	U.S. Geological Survey	USGS		38.5	-106.5	0.01	69	69	69	MISC	SEDIMENTARY	UNKNOWN	UNKNOWN	DOLOMITE																	45.9
D115942		USGS		Geochemistry of rock samples from the National Geochemical Database: U.S. Geological Survey, Reston, VA.	U.S. Geological Survey	USGS		38.5	-106.5	0.01	69	69	69	UNKNOWN	SEDIMENTARY	UNKNOWN	UNKNOWN	DOLOMITE		2	0.02	0.1				0.14		0.01	22	31			0.17	0.02							0.098	140		1.8
D115945		USGS		Geochemistry of rock samples from the National Geochemical Database: U.S. Geological Survey, Reston, VA.	U.S. Geological Survey	USGS		37.25	-115.25	0.01	67	67	67	MISC	SEDIMENTARY	UNKNOWN	UNKNOWN	DOLOMITE																	46.1
D115945		USGS		Geochemistry of rock samples from the National Geochemical Database: U.S. Geological Survey, Reston, VA.	U.S. Geological Survey	USGS		37.25	-115.25	0.01	67	67	67	UNKNOWN	SEDIMENTARY	UNKNOWN	UNKNOWN	DOLOMITE		1.6	0.07	0.42				0.12			20.5	30.2		0.08									0.15	140		2.4	0.73
D115953		USGS		Geochemistry of rock samples from the National Geochemical Database: U.S. Geological Survey, Reston, VA.	U.S. Geological Survey	USGS		39.25	-112.133	0.01	69	68	67	MISC	SEDIMENTARY	UNKNOWN	UNKNOWN	DOLOMITE																	45.8
D115953		USGS		Geochemistry of rock samples from the National Geochemical Database: U.S. Geological Survey, Reston, VA.	U.S. Geological Survey	USGS		39.25	-112.133	0.01	69	68	67	UNKNOWN	SEDIMENTARY	UNKNOWN	UNKNOWN	DOLOMITE		1.6	0.04	0.4		0.02		0.18		0.01	20.7	30		0.5	0.22	0.02							0.17	96
D115977		USGS		Geochemistry of rock samples from the National Geochemical Database: U.S. Geological Survey, Reston, VA.	U.S. Geological Survey	USGS		39.25	-112.25	0.01	69	68	67	MISC	SEDIMENTARY	UNKNOWN	UNKNOWN	DOLOMITE																	46.9
D115977		USGS		Geochemistry of rock samples from the National Geochemical Database: U.S. Geological Survey, Reston, VA.	U.S. Geological Survey	USGS		39.25	-112.25	0.01	69	68	67	UNKNOWN	SEDIMENTARY	UNKNOWN	UNKNOWN	DOLOMITE		0.4	0.01	0.1				0.14		0.02	21.5	31.3			0.1	0.01							0.14	160			0.62
D115978		USGS		Geochemistry of rock samples from the National Geochemical Database: U.S. Geological Survey, Reston, VA.	U.S. Geological Survey	USGS		36.6333	-115.25	0.01	67	67	67	MISC	SEDIMENTARY	UNKNOWN	UNKNOWN	DOLOMITE																	46.8
D115978		USGS		Geochemistry of rock samples from the National Geochemical Database: U.S. Geological Survey, Reston, VA.	U.S. Geological Survey	USGS		36.6333	-115.25	0.01	67	67	67	UNKNOWN	SEDIMENTARY	UNKNOWN	UNKNOWN	DOLOMITE		0.3	0.01	0.1		0.03		0.02		0.01	21.5	32.5			0.12	0.01								22			0.8
D115981		USGS		Geochemistry of rock samples from the National Geochemical Database: U.S. Geological Survey, Reston, VA.	U.S. Geological Survey	USGS		40.1333	-111.5	0.01	67	67	67	MISC	SEDIMENTARY	UNKNOWN	UNKNOWN	DOLOMITE																	46.4
D115981		USGS		Geochemistry of rock samples from the National Geochemical Database: U.S. Geological Survey, Reston, VA.	U.S. Geological Survey	USGS		40.1333	-111.5	0.01	67	67	67	UNKNOWN	SEDIMENTARY	UNKNOWN	UNKNOWN	DOLOMITE		0.5	0.02	0.1		0.01		0.04		0.03	22.4	31.4			0.12								0.073	130			1.6		34
D115982		USGS		Geochemistry of rock samples from the National Geochemical Database: U.S. Geological Survey, Reston, VA.	U.S. Geological Survey	USGS		36	-111.883	0.01	67	67	67	MISC	SEDIMENTARY	UNKNOWN	UNKNOWN	DOLOMITE																	41.9
D115982		USGS		Geochemistry of rock samples from the National Geochemical Database: U.S. Geological Survey, Reston, VA.	U.S. Geological Survey	USGS		36	-111.883	0.01	67	67	67	UNKNOWN	SEDIMENTARY	UNKNOWN	UNKNOWN	DOLOMITE		5.9	0.12	1.7		1.7		1.7		0.41	18.9	25.4			0.75	0.03							1.4	1600	5	4.4	2.2
D115985		USGS		Geochemistry of rock samples from the National Geochemical Database: U.S. Geological Survey, Reston, VA.	U.S. Geological Survey	USGS		38.5	-105.133	0.01	69	69	69	MISC	SEDIMENTARY	UNKNOWN	UNKNOWN	DOLOMITE																	43.7
D115985		USGS		Geochemistry of rock samples from the National Geochemical Database: U.S. Geological Survey, Reston, VA.	U.S. Geological Survey	USGS		38.5	-105.133	0.01	69	69	69	UNKNOWN	SEDIMENTARY	UNKNOWN	UNKNOWN	DOLOMITE		4.7	0.05	1.1		0.27		0.28		0.08	20.3	28.1		2.4	0.33	0.02							0.29	210		4.1	3.5		55
D115997		USGS		Geochemistry of rock samples from the National Geochemical Database: U.S. Geological Survey, Reston, VA.	U.S. Geological Survey	USGS		32.75	-107.25	0.01	69	69	69	MISC	SEDIMENTARY	UNKNOWN	UNKNOWN	DOLOMITE																	38.9
D115997		USGS		Geochemistry of rock samples from the National Geochemical Database: U.S. Geological Survey, Reston, VA.	U.S. Geological Survey	USGS		32.75	-107.25	0.01	69	69	69	UNKNOWN	SEDIMENTARY	UNKNOWN	UNKNOWN	DOLOMITE		16.7	0.03	0.3		0.43		0.22		0.05	17.3	26.2		0.85	0.15	0.02							0.3	130	3.3	2	4		37
D117311		USGS		Geochemistry of rock samples from the National Geochemical Database: U.S. Geological Survey, Reston, VA.	U.S. Geological Survey	USGS		36.25	-85.6333	0.01	69	69	69	UNKNOWN	SEDIMENTARY	UNKNOWN	UNKNOWN	DOLOMITE																							1	700	30		50
D120543		USGS		Geochemistry of rock samples from the National Geochemical Database: U.S. Geological Survey, Reston, VA.	U.S. Geological Survey	USGS		39.8667	-116.133	0.01	55	55	55	UNKNOWN	SEDIMENTARY	UNKNOWN	UNKNOWN	DOLOMITE																							1	100	50	30			7000	3000	1
D125955		USGS		Geochemistry of rock samples from the National Geochemical Database: U.S. Geological Survey, Reston, VA.	U.S. Geological Survey	USGS		36.75	-115.867	0.01	73	73	73	UNKNOWN	SEDIMENTARY	UNKNOWN	UNKNOWN	DOLOMITE																						1	0.02	30			2
D125956		USGS		Geochemistry of rock samples from the National Geochemical Database: U.S. Geological Survey, Reston, VA.	U.S. Geological Survey	USGS		36.8667	-116.133	0.01	55	55	55	UNKNOWN	SEDIMENTARY	UNKNOWN	UNKNOWN	DOLOMITE																						0.3	0.15	70			5
D126174		USGS		Geochemistry of rock samples from the National Geochemical Database: U.S. Geological Survey, Reston, VA.	U.S. Geological Survey	USGS		34.8667	-112.75	0.01	67	67	67	MISC	SEDIMENTARY	UNKNOWN	UNKNOWN	DOLOMITE																	42.5
D126174		USGS		Geochemistry of rock samples from the National Geochemical Database: U.S. Geological Survey, Reston, VA.	U.S. Geological Survey	USGS		34.8667	-112.75	0.01	67	67	67	UNKNOWN	SEDIMENTARY	UNKNOWN	UNKNOWN	DOLOMITE		7.5	0.09	1.4		0.57		0.48			18.7	27.7		0.07	0.8	0.02							0.73	150	3	3.3	2
D126175		USGS		Geochemistry of rock samples from the National Geochemical Database: U.S. Geological Survey, Reston, VA.	U.S. Geological Survey	USGS		34.8667	-112.75	0.01	67	67	67	MISC	SEDIMENTARY	UNKNOWN	UNKNOWN	DOLOMITE																	42.7
D126175		USGS		Geochemistry of rock samples from the National Geochemical Database: U.S. Geological Survey, Reston, VA.	U.S. Geological Survey	USGS		34.8667	-112.75	0.01	67	67	67	UNKNOWN	SEDIMENTARY	UNKNOWN	UNKNOWN	DOLOMITE		7	0.08	1.3		0.24		0.4			19.2	27.9			0.62	0.02							0.5	160	3.7	3.9			80
D126185		USGS		Geochemistry of rock samples from the National Geochemical Database: U.S. Geological Survey, Reston, VA.	U.S. Geological Survey	USGS		34.8667	-112.867	0.01	67	67	67	MISC	SEDIMENTARY	UNKNOWN	UNKNOWN	DOLOMITE																	26.4
D126185		USGS		Geochemistry of rock samples from the National Geochemical Database: U.S. Geological Survey, Reston, VA.	U.S. Geological Survey	USGS		34.8667	-112.867	0.01	67	67	67	UNKNOWN	SEDIMENTARY	UNKNOWN	UNKNOWN	DOLOMITE		31.4	0.4	5.8		2.8		1.7		0.18	10.3	17.7		0.15	3	0.05							2.9	1300	17	5.6	3.3		49
D126186		USGS		Geochemistry of rock samples from the National Geochemical Database: U.S. Geological Survey, Reston, VA.	U.S. Geological Survey	USGS		34.8667	-112.75	0.01	67	67	67	MISC	SEDIMENTARY	UNKNOWN	UNKNOWN	DOLOMITE																	42.7
D126186		USGS		Geochemistry of rock samples from the National Geochemical Database: U.S. Geological Survey, Reston, VA.	U.S. Geological Survey	USGS		34.8667	-112.75	0.01	67	67	67	UNKNOWN	SEDIMENTARY	UNKNOWN	UNKNOWN	DOLOMITE		7.3	0.09	1.4		0.57		0.48			18.2	27.5		0.05	0.9	0.02							0.88	290	7.7	3.4	2.2
D126189		USGS		Geochemistry of rock samples from the National Geochemical Database: U.S. Geological Survey, Reston, VA.	U.S. Geological Survey	USGS		34.8667	-112.75	0.01	67	67	67	MISC	SEDIMENTARY	UNKNOWN	UNKNOWN	DOLOMITE																	30.2
D126189		USGS		Geochemistry of rock samples from the National Geochemical Database: U.S. Geological Survey, Reston, VA.	U.S. Geological Survey	USGS		34.8667	-112.75	0.01	67	67	67	UNKNOWN	SEDIMENTARY	UNKNOWN	UNKNOWN	DOLOMITE		26.2	0.34	5.7		1		1			11	21.7		0.25	2.6	0.02							1.5	340	20	5.4	11
D126191		USGS		Geochemistry of rock samples from the National Geochemical Database: U.S. Geological Survey, Reston, VA.	U.S. Geological Survey	USGS		34.8667	-112.75	0.01	67	67	67	MISC	SEDIMENTARY	UNKNOWN	UNKNOWN	DOLOMITE																	43.3
D126191		USGS		Geochemistry of rock samples from the National Geochemical Database: U.S. Geological Survey, Reston, VA.	U.S. Geological Survey	USGS		34.8667	-112.75	0.01	67	67	67	UNKNOWN	SEDIMENTARY	UNKNOWN	UNKNOWN	DOLOMITE		6.2	0.06	1.4		0.45		0.14			18.3	28.8		0.15	0.55	0.02							0.56	260	5.6	3.2			51
D126194		USGS		Geochemistry of rock samples from the National Geochemical Database: U.S. Geological Survey, Reston, VA.	U.S. Geological Survey	USGS		34.8667	-112.867	0.01	67	67	67	MISC	SEDIMENTARY	UNKNOWN	UNKNOWN	DOLOMITE																	26.4
D126194		USGS		Geochemistry of rock samples from the National Geochemical Database: U.S. Geological Survey, Reston, VA.	U.S. Geological Survey	USGS		34.8667	-112.867	0.01	67	67	67	UNKNOWN	SEDIMENTARY	UNKNOWN	UNKNOWN	DOLOMITE		31.8	0.4	5.7		3		1.5		0.21	10.4	17.4		0.15	3	0.05							2.4	1200	8.2	5.2	3.2		55
D126203		USGS		Geochemistry of rock samples from the National Geochemical Database: U.S. Geological Survey, Reston, VA.	U.S. Geological Survey	USGS		34.8667	-112.75	0.01	67	67	67	MISC	SEDIMENTARY	UNKNOWN	UNKNOWN	DOLOMITE																	30.3
D126203		USGS		Geochemistry of rock samples from the National Geochemical Database: U.S. Geological Survey, Reston, VA.	U.S. Geological Survey	USGS		34.8667	-112.75	0.01	67	67	67	UNKNOWN	SEDIMENTARY	UNKNOWN	UNKNOWN	DOLOMITE		25.3	0.35	5.7		1.8		0.16		0.1	12.4	20.4		0.06	3.1	0.03							1.4	240	7.7	5	10		82
D126318		USGS		Geochemistry of rock samples from the National Geochemical Database: U.S. Geological Survey, Reston, VA.	U.S. Geological Survey	USGS		47	-110.633	0.01	55	55	55	UNKNOWN	SEDIMENTARY	UNKNOWN	UNKNOWN	DOLOMITE											19	32.6										0.07	0.07	70			7
D126330		USGS		Geochemistry of rock samples from the National Geochemical Database: U.S. Geological Survey, Reston, VA.	U.S. Geological Survey	USGS		47	-110.5	0.01	55	55	55	UNKNOWN	SEDIMENTARY	UNKNOWN	UNKNOWN	DOLOMITE											0.37	55.5										0.07	0.15	70			3
D126329		USGS		Geochemistry of rock samples from the National Geochemical Database: U.S. Geological Survey, Reston, VA.	U.S. Geological Survey	USGS		47	-110.5	0.01	55	55	55	UNKNOWN	SEDIMENTARY	UNKNOWN	UNKNOWN	DOLOMITE											12.5	38.5										0.3	0.15	30			3
D126331		USGS		Geochemistry of rock samples from the National Geochemical Database: U.S. Geological Survey, Reston, VA.	U.S. Geological Survey	USGS		47	-110.5	0.01	55	55	55	UNKNOWN	SEDIMENTARY	UNKNOWN	UNKNOWN	DOLOMITE											0.73	50.6										1.5	0.07	20			3
D126332		USGS		Geochemistry of rock samples from the National Geochemical Database: U.S. Geological Survey, Reston, VA.	U.S. Geological Survey	USGS		47	-110.5	0.01	55	55	55	UNKNOWN	SEDIMENTARY	UNKNOWN	UNKNOWN	DOLOMITE											8.35	44.9										0.03	0.15	500			5
D126333		USGS		Geochemistry of rock samples from the National Geochemical Database: U.S. Geological Survey, Reston, VA.	U.S. Geological Survey	USGS		47	-110.5	0.01	55	55	55	UNKNOWN	SEDIMENTARY	UNKNOWN	UNKNOWN	DOLOMITE											12.6	23.1										7	0.7	300	3	3	15
D126334		USGS		Geochemistry of rock samples from the National Geochemical Database: U.S. Geological Survey, Reston, VA.	U.S. Geological Survey	USGS		47	-110.5	0.01	55	55	55	UNKNOWN	SEDIMENTARY	UNKNOWN	UNKNOWN	DOLOMITE											16.3	24										1.5	0.15	70			15
D126335		USGS		Geochemistry of rock samples from the National Geochemical Database: U.S. Geological Survey, Reston, VA.	U.S. Geological Survey	USGS		47	-110.5	0.01	55	55	55	UNKNOWN	SEDIMENTARY	UNKNOWN	UNKNOWN	DOLOMITE											6.25	9.7											0.1	70			7
D126336		USGS		Geochemistry of rock samples from the National Geochemical Database: U.S. Geological Survey, Reston, VA.	U.S. Geological Survey	USGS		47	-110.5	0.01	55	55	55	UNKNOWN	SEDIMENTARY	UNKNOWN	UNKNOWN	DOLOMITE											20.3	30										0.07	0.15	150			7
D126337		USGS		Geochemistry of rock samples from the National Geochemical Database: U.S. Geological Survey, Reston, VA.	U.S. Geological Survey	USGS		47	-110.5	0.01	55	55	55	UNKNOWN	SEDIMENTARY	UNKNOWN	UNKNOWN	DOLOMITE											19.7	29.5										0.15	0.15	70			7
D126338		USGS		Geochemistry of rock samples from the National Geochemical Database: U.S. Geological Survey, Reston, VA.	U.S. Geological Survey	USGS		47	-110.5	0.01	55	55	55	UNKNOWN	SEDIMENTARY	UNKNOWN	UNKNOWN	DOLOMITE											19.3	28.6										0.15	0.15	70			7
D126339		USGS		Geochemistry of rock samples from the National Geochemical Database: U.S. Geological Survey, Reston, VA.	U.S. Geological Survey	USGS		47	-110.5	0.01	55	55	55	UNKNOWN	SEDIMENTARY	UNKNOWN	UNKNOWN	DOLOMITE											19.2	28.3										0.7	0.3	150	3		7
D126340		USGS		Geochemistry of rock samples from the National Geochemical Database: U.S. Geological Survey, Reston, VA.	U.S. Geological Survey	USGS		47	-110.5	0.01	55	55	55	UNKNOWN	SEDIMENTARY	UNKNOWN	UNKNOWN	DOLOMITE											19.5	29.1										0.3	0.3	70	3		7
D127963		USGS		Geochemistry of rock samples from the National Geochemical Database: U.S. Geological Survey, Reston, VA.	U.S. Geological Survey	USGS		36.75	-85.25	0.01	55	55	55	UNKNOWN	SEDIMENTARY	UNKNOWN	UNKNOWN	DOLOMITE																							0.82	520	52	8	9
D131126		USGS		Geochemistry of rock samples from the National Geochemical Database: U.S. Geological Survey, Reston, VA.	U.S. Geological Survey	USGS		38.375	-116.375	0.01	73	73	73	UNKNOWN	SEDIMENTARY	UNKNOWN	UNKNOWN	DOLOMITE																2.26
D131127		USGS		Geochemistry of rock samples from the National Geochemical Database: U.S. Geological Survey, Reston, VA.	U.S. Geological Survey	USGS		38.375	-116.375	0.01	73	73	73	UNKNOWN	SEDIMENTARY	UNKNOWN	UNKNOWN	DOLOMITE																1.64
D132076		USGS		Geochemistry of rock samples from the National Geochemical Database: U.S. Geological Survey, Reston, VA.	U.S. Geological Survey	USGS		40.8833	-109.75	0.01	71	71	71	UNKNOWN	SEDIMENTARY	UNKNOWN	UNKNOWN	DOLOMITE																						3	0.5	100	30		15
D132078		USGS		Geochemistry of rock samples from the National Geochemical Database: U.S. Geological Survey, Reston, VA.	U.S. Geological Survey	USGS		40.8833	-109.75	0.01	71	71	71	MISC	SEDIMENTARY	UNKNOWN	UNKNOWN	DOLOMITE																	12.3
D132078		USGS		Geochemistry of rock samples from the National Geochemical Database: U.S. Geological Survey, Reston, VA.	U.S. Geological Survey	USGS		40.8833	-109.75	0.01	71	71	71	UNKNOWN	SEDIMENTARY	UNKNOWN	UNKNOWN	DOLOMITE		27	0.21	5.7							2.63	30.5		0.95	0.86	17						7	0.7		70		30		0.011	0.003
D132080		USGS		Geochemistry of rock samples from the National Geochemical Database: U.S. Geological Survey, Reston, VA.	U.S. Geological Survey	USGS		40.8833	-109.75	0.01	71	71	71	UNKNOWN	SEDIMENTARY	UNKNOWN	UNKNOWN	DOLOMITE																							1.5	50	50	3	50
D132082		USGS		Geochemistry of rock samples from the National Geochemical Database: U.S. Geological Survey, Reston, VA.	U.S. Geological Survey	USGS		40.8833	-109.75	0.01	71	71	71	UNKNOWN	SEDIMENTARY	UNKNOWN	UNKNOWN	DOLOMITE																						7	1	70	50		100
D132085		USGS		Geochemistry of rock samples from the National Geochemical Database: U.S. Geological Survey, Reston, VA.	U.S. Geological Survey	USGS		40.8833	-109.75	0.01	71	71	71	UNKNOWN	SEDIMENTARY	UNKNOWN	UNKNOWN	DOLOMITE																						10	0.7	70	15		15
D132086		USGS		Geochemistry of rock samples from the National Geochemical Database: U.S. Geological Survey, Reston, VA.	U.S. Geological Survey	USGS		40.8833	-109.75	0.01	71	71	71	UNKNOWN	SEDIMENTARY	UNKNOWN	UNKNOWN	DOLOMITE																						10	1	70	30		30
D132088		USGS		Geochemistry of rock samples from the National Geochemical Database: U.S. Geological Survey, Reston, VA.	U.S. Geological Survey	USGS		40.8833	-109.75	0.01	71	71	71	UNKNOWN	SEDIMENTARY	UNKNOWN	UNKNOWN	DOLOMITE																							0.7	50	20		15
D132094		USGS		Geochemistry of rock samples from the National Geochemical Database: U.S. Geological Survey, Reston, VA.	U.S. Geological Survey	USGS		40.8833	-109.75	0.01	71	71	71	UNKNOWN	SEDIMENTARY	UNKNOWN	UNKNOWN	DOLOMITE																						10	1	50	20		20
D132098		USGS		Geochemistry of rock samples from the National Geochemical Database: U.S. Geological Survey, Reston, VA.	U.S. Geological Survey	USGS		40.8833	-109.75	0.01	71	71	71	UNKNOWN	SEDIMENTARY	UNKNOWN	UNKNOWN	DOLOMITE																						1.5	1	150	30		7
D132100		USGS		Geochemistry of rock samples from the National Geochemical Database: U.S. Geological Survey, Reston, VA.	U.S. Geological Survey	USGS		40.8833	-109.75	0.01	71	71	71	UNKNOWN	SEDIMENTARY	UNKNOWN	UNKNOWN	DOLOMITE																							1	70	20		20
D132102		USGS		Geochemistry of rock samples from the National Geochemical Database: U.S. Geological Survey, Reston, VA.	U.S. Geological Survey	USGS		40.8833	-109.75	0.01	71	71	71	MISC	SEDIMENTARY	UNKNOWN	UNKNOWN	DOLOMITE																	13.9
D132102		USGS		Geochemistry of rock samples from the National Geochemical Database: U.S. Geological Survey, Reston, VA.	U.S. Geological Survey	USGS		40.8833	-109.75	0.01	71	71	71	UNKNOWN	SEDIMENTARY	UNKNOWN	UNKNOWN	DOLOMITE		49.6	0.1	1.55							4.45	18		0.1	0.22	7						10	1		20		10		0.009
D132104		USGS		Geochemistry of rock samples from the National Geochemical Database: U.S. Geological Survey, Reston, VA.	U.S. Geological Survey	USGS		40.8833	-109.75	0.01	71	71	71	MISC	SEDIMENTARY	UNKNOWN	UNKNOWN	DOLOMITE																	19
D132104		USGS		Geochemistry of rock samples from the National Geochemical Database: U.S. Geological Survey, Reston, VA.	U.S. Geological Survey	USGS		40.8833	-109.75	0.01	71	71	71	UNKNOWN	SEDIMENTARY	UNKNOWN	UNKNOWN	DOLOMITE		50.7	0.1	1.36							7	13.5		0.12	0.48	1.52						10	0.7		15		20		0.008
D132106		USGS		Geochemistry of rock samples from the National Geochemical Database: U.S. Geological Survey, Reston, VA.	U.S. Geological Survey	USGS		40.8833	-109.75	0.01	71	71	71	UNKNOWN	SEDIMENTARY	UNKNOWN	UNKNOWN	DOLOMITE																						10	1	150	15		5
D132107		USGS		Geochemistry of rock samples from the National Geochemical Database: U.S. Geological Survey, Reston, VA.	U.S. Geological Survey	USGS		40.8833	-109.75	0.01	71	71	71	UNKNOWN	SEDIMENTARY	UNKNOWN	UNKNOWN	DOLOMITE																							1	50	15		15
D132108		USGS		Geochemistry of rock samples from the National Geochemical Database: U.S. Geological Survey, Reston, VA.	U.S. Geological Survey	USGS		40.8833	-109.75	0.01	71	71	71	UNKNOWN	SEDIMENTARY	UNKNOWN	UNKNOWN	DOLOMITE																						10	1	100	15		5
D132110		USGS		Geochemistry of rock samples from the National Geochemical Database: U.S. Geological Survey, Reston, VA.	U.S. Geological Survey	USGS		40.8833	-109.75	0.01	71	71	71	UNKNOWN	SEDIMENTARY	UNKNOWN	UNKNOWN	DOLOMITE																						7	0.7	150	20		7
D132112		USGS		Geochemistry of rock samples from the National Geochemical Database: U.S. Geological Survey, Reston, VA.	U.S. Geological Survey	USGS		40.8833	-109.75	0.01	71	71	71	UNKNOWN	SEDIMENTARY	UNKNOWN	UNKNOWN	DOLOMITE																						5	0.7	200	15		5
D132114		USGS		Geochemistry of rock samples from the National Geochemical Database: U.S. Geological Survey, Reston, VA.	U.S. Geological Survey	USGS		40.8833	-109.75	0.01	71	71	71	UNKNOWN	SEDIMENTARY	UNKNOWN	UNKNOWN	DOLOMITE																						5	0.7	150	20		7
D132488		USGS		Geochemistry of rock samples from the National Geochemical Database: U.S. Geological Survey, Reston, VA.	U.S. Geological Survey	USGS		38.5	-116.25	0.01	73	73	73	UNKNOWN	SEDIMENTARY	UNKNOWN	UNKNOWN	DOLOMITE																5.4
D133018		USGS		Geochemistry of rock samples from the National Geochemical Database: U.S. Geological Survey, Reston, VA.	U.S. Geological Survey	USGS		38.375	-116.375	0.01				UNKNOWN	SEDIMENTARY	UNKNOWN	UNKNOWN	DOLOMITE																1.28
D133225		USGS		Geochemistry of rock samples from the National Geochemical Database: U.S. Geological Survey, Reston, VA.	U.S. Geological Survey	USGS		65.6708	-165.475	0.01	3	34	65	AAS	SEDIMENTARY	UNKNOWN	UNKNOWN	DOLOMITE											1.51	51.4		0.02	0.04
D133225		USGS		Geochemistry of rock samples from the National Geochemical Database: U.S. Geological Survey, Reston, VA.	U.S. Geological Survey	USGS		65.6708	-165.475	0.01	3	34	65	COL	SEDIMENTARY	UNKNOWN	UNKNOWN	DOLOMITE		0.42	0.02	0.29		2.72				0.11						0.11
D133225		USGS		Geochemistry of rock samples from the National Geochemical Database: U.S. Geological Survey, Reston, VA.	U.S. Geological Survey	USGS		65.6708	-165.475	0.01	3	34	65	ES	SEDIMENTARY	UNKNOWN	UNKNOWN	DOLOMITE																						0.15	1.5	700	5		7
D133225		USGS		Geochemistry of rock samples from the National Geochemical Database: U.S. Geological Survey, Reston, VA.	U.S. Geological Survey	USGS		65.6708	-165.475	0.01	3	34	65	ISE	SEDIMENTARY	UNKNOWN	UNKNOWN	DOLOMITE
D133225		USGS		Geochemistry of rock samples from the National Geochemical Database: U.S. Geological Survey, Reston, VA.	U.S. Geological Survey	USGS		65.6708	-165.475	0.01	3	34	65	TITR	SEDIMENTARY	UNKNOWN	UNKNOWN	DOLOMITE								0.41
D133672		USGS		Geochemistry of rock samples from the National Geochemical Database: U.S. Geological Survey, Reston, VA.	U.S. Geological Survey	USGS		39.5	-116.133	0.01	73	73	73	UNKNOWN	SEDIMENTARY	UNKNOWN	UNKNOWN	DOLOMITE		11.3	0.05	0.48		0.19		0.04			17.7	29		0.02	0.21	0.15						1.5	0.15	100	5		10
D133674		USGS		Geochemistry of rock samples from the National Geochemical Database: U.S. Geological Survey, Reston, VA.	U.S. Geological Survey	USGS		39.5	-116.133	0.01	73	73	73	UNKNOWN	SEDIMENTARY	UNKNOWN	UNKNOWN	DOLOMITE		6.2	0.05			0.12		0.04			18.6	30.6		0.03	0.23							1	0.1	100			2
D133686		USGS		Geochemistry of rock samples from the National Geochemical Database: U.S. Geological Survey, Reston, VA.	U.S. Geological Survey	USGS		38.75	-116.5	0.01	73	73	73	UNKNOWN	SEDIMENTARY	UNKNOWN	UNKNOWN	DOLOMITE		33	0.18	2.8		0.55		0.08		0.02	12.6	19.6			0.71	0.05						5	0.5	100			5
D139038		USGS		Geochemistry of rock samples from the National Geochemical Database: U.S. Geological Survey, Reston, VA.	U.S. Geological Survey	USGS		38.5417	-116.4	0.01	73	73	73	UNKNOWN	SEDIMENTARY	UNKNOWN	UNKNOWN	DOLOMITE		2.1	0.02	0.27				0.18			20.9	28		0.08	0.17	0.06						0.3	0.07	100	5		2
D139039		USGS		Geochemistry of rock samples from the National Geochemical Database: U.S. Geological Survey, Reston, VA.	U.S. Geological Survey	USGS		38.55	-116.4	0.01	73	73	73	UNKNOWN	SEDIMENTARY	UNKNOWN	UNKNOWN	DOLOMITE		6.8	0.05	1.3		0.05		0.2			19.8	26.5		0.14	0.23	0.14						0.7	0.15	100	5		2
D139040		USGS		Geochemistry of rock samples from the National Geochemical Database: U.S. Geological Survey, Reston, VA.	U.S. Geological Survey	USGS		38.55	-116.4	0.01	73	73	73	UNKNOWN	SEDIMENTARY	UNKNOWN	UNKNOWN	DOLOMITE		15	0.03	0.7		0.05		0.2			18.2	24.7		0.07	0.2	0.04						2	0.15	70			2
D139265		USGS		Geochemistry of rock samples from the National Geochemical Database: U.S. Geological Survey, Reston, VA.	U.S. Geological Survey	USGS		69.5	-145.125	0.01	59	59	59	ES	SEDIMENTARY	UNKNOWN	UNKNOWN	DOLOMITE																							3	70	50	7	20
D139417		USGS		Geochemistry of rock samples from the National Geochemical Database: U.S. Geological Survey, Reston, VA.	U.S. Geological Survey	USGS		68.5	-156.625	0.01	56	56	56	ES	SEDIMENTARY	UNKNOWN	UNKNOWN	DOLOMITE																							0.3	3000	15	7	7
D139619		USGS		Geochemistry of rock samples from the National Geochemical Database: U.S. Geological Survey, Reston, VA.	U.S. Geological Survey	USGS		68.875	-162.75	0.01	59	59	59	ES	SEDIMENTARY	UNKNOWN	UNKNOWN	DOLOMITE																							2	100	100	15	1000
D139621		USGS		Geochemistry of rock samples from the National Geochemical Database: U.S. Geological Survey, Reston, VA.	U.S. Geological Survey	USGS		68.875	-162.75	0.01	59	59	59	ES	SEDIMENTARY	UNKNOWN	UNKNOWN	DOLOMITE																							2	150	70	15	150
D140870		USGS		Geochemistry of rock samples from the National Geochemical Database: U.S. Geological Survey, Reston, VA.	U.S. Geological Survey	USGS		40.6167	-114.617	0.01	71	71	71	UNKNOWN	SEDIMENTARY	UNKNOWN	UNKNOWN	DOLOMITE																0.37
D140873		USGS		Geochemistry of rock samples from the National Geochemical Database: U.S. Geological Survey, Reston, VA.	U.S. Geological Survey	USGS		40.6167	-114.617	0.01	71	71	71	UNKNOWN	SEDIMENTARY	UNKNOWN	UNKNOWN	DOLOMITE																2.02
D141116		USGS		Geochemistry of rock samples from the National Geochemical Database: U.S. Geological Survey, Reston, VA.	U.S. Geological Survey	USGS		40.8833	-116.35	0.01	69	69	69	UNKNOWN	SEDIMENTARY	UNKNOWN	UNKNOWN	DOLOMITE		16.7	0.02	0.27				0.12		0.04	17.4	26		0.02	0.07							2	0.07	70	5		1
D141117		USGS		Geochemistry of rock samples from the National Geochemical Database: U.S. Geological Survey, Reston, VA.	U.S. Geological Survey	USGS		40.8833	-116.35	0.01	73	73	73	UNKNOWN	SEDIMENTARY	UNKNOWN	UNKNOWN	DOLOMITE		15.3	0.07	1.2		1.9		0.24		0.08	16.7	25.5			0.3	0.04						2	0.2	70	15		7
D141120		USGS		Geochemistry of rock samples from the National Geochemical Database: U.S. Geological Survey, Reston, VA.	U.S. Geological Survey	USGS		38.9333	-116.5	0.01	55	64	73	UNKNOWN	SEDIMENTARY	UNKNOWN	UNKNOWN	DOLOMITE		33.1	0.27	5.6		0.8		0.36		0.06	11.1	18.3			2.7	0.04						10	0.7	100	7	3	5
D141121		USGS		Geochemistry of rock samples from the National Geochemical Database: U.S. Geological Survey, Reston, VA.	U.S. Geological Survey	USGS		38.8667	-116.517	0.01	73	73	73	UNKNOWN	SEDIMENTARY	UNKNOWN	UNKNOWN	DOLOMITE		17.5	0.13	2.5		0.28		0.44		0.04	16.7	24.5			0.89	0.02						2	0.3	50	5		5
D141122		USGS		Geochemistry of rock samples from the National Geochemical Database: U.S. Geological Survey, Reston, VA.	U.S. Geological Survey	USGS		38.8667	-116.517	0.01	73	73	73	UNKNOWN	SEDIMENTARY	UNKNOWN	UNKNOWN	DOLOMITE		20.5	0.13	2		0.29		0.28		0.04	15.9	24			0.63	0.32						2	0.2	50	5		3
D141123		USGS		Geochemistry of rock samples from the National Geochemical Database: U.S. Geological Survey, Reston, VA.	U.S. Geological Survey	USGS		40.5167	-116	0.01	73	71	69	UNKNOWN	SEDIMENTARY	UNKNOWN	UNKNOWN	DOLOMITE		0.6	0.02	0.35				0.24		0.06	20.5	31.5			0.07							0.1	0.15	100			1
D141125		USGS		Geochemistry of rock samples from the National Geochemical Database: U.S. Geological Survey, Reston, VA.	U.S. Geological Survey	USGS		39.0167	-116.783	0.01	55	64	73	UNKNOWN	SEDIMENTARY	UNKNOWN	UNKNOWN	DOLOMITE		32.2	0.18	2.8		0.47		0.2		0.03	11.9	20.2			1.6	0.32						10	0.5	70	5		5
D142214		USGS		Geochemistry of rock samples from the National Geochemical Database: U.S. Geological Survey, Reston, VA.	U.S. Geological Survey	USGS		37.6419	-90.9114	0.01	67	67	67	UNKNOWN	SEDIMENTARY	UNKNOWN	UNKNOWN	DOLOMITE		3		2							21.8	30		0.06	0.5							0.5	0.2	100
D142215		USGS		Geochemistry of rock samples from the National Geochemical Database: U.S. Geological Survey, Reston, VA.	U.S. Geological Survey	USGS		37.6861	-90.7117	0.01	67	67	67	UNKNOWN	SEDIMENTARY	UNKNOWN	UNKNOWN	DOLOMITE		2		1							9.21	45		0.02	0.3							0.5	0.2	700
D142216		USGS		Geochemistry of rock samples from the National Geochemical Database: U.S. Geological Survey, Reston, VA.	U.S. Geological Survey	USGS		37.6883	-90.7094	0.01	67	67	67	UNKNOWN	SEDIMENTARY	UNKNOWN	UNKNOWN	DOLOMITE		5		3							19.5	30		0.05	1.1							0.7	0.5	1000
D142217		USGS		Geochemistry of rock samples from the National Geochemical Database: U.S. Geological Survey, Reston, VA.	U.S. Geological Survey	USGS		37.4739	-90.9094	0.01	67	67	67	UNKNOWN	SEDIMENTARY	UNKNOWN	UNKNOWN	DOLOMITE		18		12							17.5	26		0.04	1.5							3	0.5	150
D142218		USGS		Geochemistry of rock samples from the National Geochemical Database: U.S. Geological Survey, Reston, VA.	U.S. Geological Survey	USGS		37.685	-90.7094	0.01	67	67	67	UNKNOWN	SEDIMENTARY	UNKNOWN	UNKNOWN	DOLOMITE				1							21	33		0.06	0.1							0.15	0.7	500
D142219		USGS		Geochemistry of rock samples from the National Geochemical Database: U.S. Geological Survey, Reston, VA.	U.S. Geological Survey	USGS		37.6861	-90.7072	0.01	67	67	67	UNKNOWN	SEDIMENTARY	UNKNOWN	UNKNOWN	DOLOMITE		3		2							20.8	32		0.06	0.4							0.5	0.3	500
D142220		USGS		Geochemistry of rock samples from the National Geochemical Database: U.S. Geological Survey, Reston, VA.	U.S. Geological Survey	USGS		37.4739	-90.9094	0.01	67	67	67	UNKNOWN	SEDIMENTARY	UNKNOWN	UNKNOWN	DOLOMITE		25		2							16.4	25		0.04	0.7							5	0.3	150
D142221		USGS		Geochemistry of rock samples from the National Geochemical Database: U.S. Geological Survey, Reston, VA.	U.S. Geological Survey	USGS		37.4722	-90.9136	0.01	67	67	67	UNKNOWN	SEDIMENTARY	UNKNOWN	UNKNOWN	DOLOMITE		2		1							21.4	32		0.06	0.1							0.3	0.15	150			1
D142222		USGS		Geochemistry of rock samples from the National Geochemical Database: U.S. Geological Survey, Reston, VA.	U.S. Geological Survey	USGS		37.6861	-90.7094	0.01	67	67	67	UNKNOWN	SEDIMENTARY	UNKNOWN	UNKNOWN	DOLOMITE		1		1							20.3	32		0.06	0.3							0.3	0.3	500
D142223		USGS		Geochemistry of rock samples from the National Geochemical Database: U.S. Geological Survey, Reston, VA.	U.S. Geological Survey	USGS		37.4783	-90.9072	0.01	67	67	67	UNKNOWN	SEDIMENTARY	UNKNOWN	UNKNOWN	DOLOMITE		9		3							19.8	31		0.04								1.5	0.1	70			2
D142224		USGS		Geochemistry of rock samples from the National Geochemical Database: U.S. Geological Survey, Reston, VA.	U.S. Geological Survey	USGS		37.4747	-90.9122	0.01	67	67	67	UNKNOWN	SEDIMENTARY	UNKNOWN	UNKNOWN	DOLOMITE											21.7	33		0.04								0.15	0.3	150
D142225		USGS		Geochemistry of rock samples from the National Geochemical Database: U.S. Geological Survey, Reston, VA.	U.S. Geological Survey	USGS		37.6861	-90.7106	0.01	67	67	67	UNKNOWN	SEDIMENTARY	UNKNOWN	UNKNOWN	DOLOMITE											20.8	33		0.06								0.1	1	1000
D142226		USGS		Geochemistry of rock samples from the National Geochemical Database: U.S. Geological Survey, Reston, VA.	U.S. Geological Survey	USGS		37.6861	-90.7083	0.01	67	67	67	UNKNOWN	SEDIMENTARY	UNKNOWN	UNKNOWN	DOLOMITE											20.3	33		0.05								0.1	0.5	500
D142227		USGS		Geochemistry of rock samples from the National Geochemical Database: U.S. Geological Survey, Reston, VA.	U.S. Geological Survey	USGS		37.4711	-90.9144	0.01	67	67	67	UNKNOWN	SEDIMENTARY	UNKNOWN	UNKNOWN	DOLOMITE											21.5	33		0.08								0.05	0.05	70
D142228		USGS		Geochemistry of rock samples from the National Geochemical Database: U.S. Geological Survey, Reston, VA.	U.S. Geological Survey	USGS		37.4722	-90.9136	0.01	67	67	67	UNKNOWN	SEDIMENTARY	UNKNOWN	UNKNOWN	DOLOMITE											21.7	32		0.06								0.1	0.07	70			1
D142229		USGS		Geochemistry of rock samples from the National Geochemical Database: U.S. Geological Survey, Reston, VA.	U.S. Geological Survey	USGS		37.4711	-90.9144	0.01	67	67	67	UNKNOWN	SEDIMENTARY	UNKNOWN	UNKNOWN	DOLOMITE											21.4	33		0.04								0.2	0.07	100
D142230		USGS		Geochemistry of rock samples from the National Geochemical Database: U.S. Geological Survey, Reston, VA.	U.S. Geological Survey	USGS		37.4783	-90.9072	0.01	67	67	67	UNKNOWN	SEDIMENTARY	UNKNOWN	UNKNOWN	DOLOMITE		13									18.6	29		0.02								2	0.15	150			2
D142231		USGS		Geochemistry of rock samples from the National Geochemical Database: U.S. Geological Survey, Reston, VA.	U.S. Geological Survey	USGS		37.6872	-90.7094	0.01	67	67	67	UNKNOWN	SEDIMENTARY	UNKNOWN	UNKNOWN	DOLOMITE											20	33		0.05	0.2							0.2	0.7	700
D142232		USGS		Geochemistry of rock samples from the National Geochemical Database: U.S. Geological Survey, Reston, VA.	U.S. Geological Survey	USGS		37.4753	-90.9114	0.01	67	67	67	UNKNOWN	SEDIMENTARY	UNKNOWN	UNKNOWN	DOLOMITE											21.1	33		0.07	0.1							0.15	0.1	70			2
D142233		USGS		Geochemistry of rock samples from the National Geochemical Database: U.S. Geological Survey, Reston, VA.	U.S. Geological Survey	USGS		37.6839	-90.7094	0.01	67	67	67	UNKNOWN	SEDIMENTARY	UNKNOWN	UNKNOWN	DOLOMITE											20.2	33		0.06	0.2							0.15	0.5	500
D142234		USGS		Geochemistry of rock samples from the National Geochemical Database: U.S. Geological Survey, Reston, VA.	U.S. Geological Survey	USGS		37.4711	-90.9144	0.01	67	67	67	UNKNOWN	SEDIMENTARY	UNKNOWN	UNKNOWN	DOLOMITE											20.9	32		0.03	0.2							0.3	0.15	100			3
D142235		USGS		Geochemistry of rock samples from the National Geochemical Database: U.S. Geological Survey, Reston, VA.	U.S. Geological Survey	USGS		37.6861	-90.7094	0.01	67	67	67	UNKNOWN	SEDIMENTARY	UNKNOWN	UNKNOWN	DOLOMITE		1		1							20.2	32		0.04	0.4							0.3	0.5	500
D142236		USGS		Geochemistry of rock samples from the National Geochemical Database: U.S. Geological Survey, Reston, VA.	U.S. Geological Survey	USGS		37.4747	-90.9122	0.01	69	68	67	UNKNOWN	SEDIMENTARY	UNKNOWN	UNKNOWN	DOLOMITE											19.4	32		0.03	0.3							0.2	1.5	3000	7	7	200
D143924		USGS		Geochemistry of rock samples from the National Geochemical Database: U.S. Geological Survey, Reston, VA.	U.S. Geological Survey	USGS		41.25	-116	0.01	73	73	73	UNKNOWN	SEDIMENTARY	UNKNOWN	UNKNOWN	DOLOMITE		1.5		0.1		0.04		0.04		0.02	20.6	30.6			0.1	0.21						0.2	0.05	70			2
D143925		USGS		Geochemistry of rock samples from the National Geochemical Database: U.S. Geological Survey, Reston, VA.	U.S. Geological Survey	USGS		40.875	-116.25	0.01	55	64	73	UNKNOWN	SEDIMENTARY	UNKNOWN	UNKNOWN	DOLOMITE		23.4	0.19	3.4		0.45		0.68			10.1	27.3		0.09	1.6	0.03						3	0.5	70	15		7
D143926		USGS		Geochemistry of rock samples from the National Geochemical Database: U.S. Geological Survey, Reston, VA.	U.S. Geological Survey	USGS		40.875	-116.25	0.01	55	64	73	UNKNOWN	SEDIMENTARY	UNKNOWN	UNKNOWN	DOLOMITE		27.2	0.24	4.5		0.64		0.6		0.02	0.62	28.8		0.12	1.6	0.04						5	0.7	70	10		7
D143927		USGS		Geochemistry of rock samples from the National Geochemical Database: U.S. Geological Survey, Reston, VA.	U.S. Geological Survey	USGS		40.875	-116.25	0.01	55	64	73	UNKNOWN	SEDIMENTARY	UNKNOWN	UNKNOWN	DOLOMITE		24.7	0.19	3.8		0.65		0.68		0.02	5.9	31.4		0.05	1.4	0.04						3	0.5	70	15		5
D144201		USGS		Geochemistry of rock samples from the National Geochemical Database: U.S. Geological Survey, Reston, VA.	U.S. Geological Survey	USGS		38.6167	-117.117	0.01	55	64	73	UNKNOWN	SEDIMENTARY	UNKNOWN	UNKNOWN	DOLOMITE		38.7	0.28	4.6		1		0.6		0.02	11.1	16.3		0.32	2.3	0.04						10	0.7	150	7	3	10
D144207		USGS		Geochemistry of rock samples from the National Geochemical Database: U.S. Geological Survey, Reston, VA.	U.S. Geological Survey	USGS		39	-116.617	0.01	55	64	73	UNKNOWN	SEDIMENTARY	UNKNOWN	UNKNOWN	DOLOMITE		30.6	0.16	3.3		0.2		0.4		0.02	4.5	30.6		0.03	0.75	0.04						7	0.3	100	5		3
D149407		USGS		Geochemistry of rock samples from the National Geochemical Database: U.S. Geological Survey, Reston, VA.	U.S. Geological Survey	USGS		39.6667	-116.75	0.01	73	73	73	UNKNOWN	SEDIMENTARY	UNKNOWN	UNKNOWN	DOLOMITE		38.7	0.27	5.8		0.28		1.2			5.6	29.1		0.72	1.9	0.04							1	150	30		15		500		0.5
D155182		USGS		Geochemistry of rock samples from the National Geochemical Database: U.S. Geological Survey, Reston, VA.	U.S. Geological Survey	USGS		38.1294	-117.994	0.01	71	70.5	70	UNKNOWN	SEDIMENTARY	UNKNOWN	UNKNOWN	DOLOMITE		3	0.03	0.25		0.15		1.5		0.15	20.1	29.3			0.13	0.02						0.5	1.5	500	5		15
D155183		USGS		Geochemistry of rock samples from the National Geochemical Database: U.S. Geological Survey, Reston, VA.	U.S. Geological Survey	USGS		38.1294	-117.994	0.01	71	70.5	70	UNKNOWN	SEDIMENTARY	UNKNOWN	UNKNOWN	DOLOMITE		7.2	0.02	0.21		0.59		1.1		0.11	19.2	28.1			0.11	0.03						1	1.5	500	10		50
D155185		USGS		Geochemistry of rock samples from the National Geochemical Database: U.S. Geological Survey, Reston, VA.	U.S. Geological Survey	USGS		38.5292	-116.892	0.01	59	64.5	70	UNKNOWN	SEDIMENTARY	UNKNOWN	UNKNOWN	DOLOMITE		10.5	0.02	0.7		0.66		3.4		0.15	16.9	26.4			0.08	0.02						2	2	700	300	30	7
D155189		USGS		Geochemistry of rock samples from the National Geochemical Database: U.S. Geological Survey, Reston, VA.	U.S. Geological Survey	USGS		38.5269	-116.89	0.01	59	64.5	70	UNKNOWN	SEDIMENTARY	UNKNOWN	UNKNOWN	DOLOMITE		10.5	0.02	0.5		4.6		0.12		0.21	18.2	25.5		0.02	0.05	0.02						2	2	700	300	10	20
D155195		USGS		Geochemistry of rock samples from the National Geochemical Database: U.S. Geological Survey, Reston, VA.	U.S. Geological Survey	USGS		38.4922	-117.199	0.01	59	64.5	70	UNKNOWN	SEDIMENTARY	UNKNOWN	UNKNOWN	DOLOMITE		32	0.33	2.4		0.56		1.4		0.15	10.8	21		0.09	0.44	1.7						7	1	700	10	3	20
D155199		USGS		Geochemistry of rock samples from the National Geochemical Database: U.S. Geological Survey, Reston, VA.	U.S. Geological Survey	USGS		38.7042	-117.26	0.01	59	64.5	70	UNKNOWN	SEDIMENTARY	UNKNOWN	UNKNOWN	DOLOMITE		32.1	0.08	1.9		0.6		4		0.08	10.8	19.5		0.02	0.35	0.04						7	1.5	500	10		7
D155601		USGS		Geochemistry of rock samples from the National Geochemical Database: U.S. Geological Survey, Reston, VA.	U.S. Geological Survey	USGS		39.75	-113.25	0.01	73	73	73	UNKNOWN	SEDIMENTARY	UNKNOWN	UNKNOWN	DOLOMITE																						0.5	0.1	200	7		7
D159734		USGS		Geochemistry of rock samples from the National Geochemical Database: U.S. Geological Survey, Reston, VA.	U.S. Geological Survey	USGS		38.25	-113.625	0.01	55	55	55	UNKNOWN	SEDIMENTARY	UNKNOWN	UNKNOWN	DOLOMITE																						0.03	0.07	150			1.5
D159735		USGS		Geochemistry of rock samples from the National Geochemical Database: U.S. Geological Survey, Reston, VA.	U.S. Geological Survey	USGS		38.25	-113.625	0.01	55	55	55	UNKNOWN	SEDIMENTARY	UNKNOWN	UNKNOWN	DOLOMITE																						10	0.7	300	15		7
D159736		USGS		Geochemistry of rock samples from the National Geochemical Database: U.S. Geological Survey, Reston, VA.	U.S. Geological Survey	USGS		38.25	-113.625	0.01	55	55	55	UNKNOWN	SEDIMENTARY	UNKNOWN	UNKNOWN	DOLOMITE																							0.7	150	5		7
D159737		USGS		Geochemistry of rock samples from the National Geochemical Database: U.S. Geological Survey, Reston, VA.	U.S. Geological Survey	USGS		38.25	-113.625	0.01	55	55	55	UNKNOWN	SEDIMENTARY	UNKNOWN	UNKNOWN	DOLOMITE																							0.5	1500	20	3	20
D159747		USGS		Geochemistry of rock samples from the National Geochemical Database: U.S. Geological Survey, Reston, VA.	U.S. Geological Survey	USGS		38.25	-113.625	0.01	55	55	55	UNKNOWN	SEDIMENTARY	UNKNOWN	UNKNOWN	DOLOMITE																						0.15	0.07	150			3
D159754		USGS		Geochemistry of rock samples from the National Geochemical Database: U.S. Geological Survey, Reston, VA.	U.S. Geological Survey	USGS		38.25	-113.625	0.01	55	55	55	UNKNOWN	SEDIMENTARY	UNKNOWN	UNKNOWN	DOLOMITE																						0.03	0.05	150			3
D159755		USGS		Geochemistry of rock samples from the National Geochemical Database: U.S. Geological Survey, Reston, VA.	U.S. Geological Survey	USGS		38.25	-113.625	0.01	55	55	55	UNKNOWN	SEDIMENTARY	UNKNOWN	UNKNOWN	DOLOMITE																						0.03	0.03	50			1.5
D159757		USGS		Geochemistry of rock samples from the National Geochemical Database: U.S. Geological Survey, Reston, VA.	U.S. Geological Survey	USGS		38.25	-113.625	0.01	55	55	55	UNKNOWN	SEDIMENTARY	UNKNOWN	UNKNOWN	DOLOMITE																						1	0.3	1000	7		3
D161246		USGS		Geochemistry of rock samples from the National Geochemical Database: U.S. Geological Survey, Reston, VA.	U.S. Geological Survey	USGS		37.5833	-90.5	0.01	67	67	67	UNKNOWN	SEDIMENTARY	UNKNOWN	UNKNOWN	DOLOMITE																						7	1.5	1000	10	5	10
D162098		USGS		Geochemistry of rock samples from the National Geochemical Database: U.S. Geological Survey, Reston, VA.	U.S. Geological Survey	USGS		32.4167	-103.933	0.01	71	71	71	UNKNOWN	SEDIMENTARY	UNKNOWN	UNKNOWN	DOLOMITE											5.63	25.7		0.03	0.27							1.5	0.15	20			7
D163283		USGS		Geochemistry of rock samples from the National Geochemical Database: U.S. Geological Survey, Reston, VA.	U.S. Geological Survey	USGS		40.5333	-110.433	0.01	71	71	71	UNKNOWN	SEDIMENTARY	UNKNOWN	UNKNOWN	DOLOMITE																						2	0.15	70	7		7
D163635		USGS		Geochemistry of rock samples from the National Geochemical Database: U.S. Geological Survey, Reston, VA.	U.S. Geological Survey	USGS		40.6167	-111.25	0.01	71	71	71	UNKNOWN	SEDIMENTARY	UNKNOWN	UNKNOWN	DOLOMITE																							1.5	300	30		10
D163638		USGS		Geochemistry of rock samples from the National Geochemical Database: U.S. Geological Survey, Reston, VA.	U.S. Geological Survey	USGS		40.6167	-111.25	0.01	71	71	71	UNKNOWN	SEDIMENTARY	UNKNOWN	UNKNOWN	DOLOMITE																							0.7	200	30		10
D163645		USGS		Geochemistry of rock samples from the National Geochemical Database: U.S. Geological Survey, Reston, VA.	U.S. Geological Survey	USGS		40.6167	-111.25	0.01	71	71	71	UNKNOWN	SEDIMENTARY	UNKNOWN	UNKNOWN	DOLOMITE																							0.7	150	15		7				1
D163650		USGS		Geochemistry of rock samples from the National Geochemical Database: U.S. Geological Survey, Reston, VA.	U.S. Geological Survey	USGS		40.6167	-111.25	0.01	71	71	71	UNKNOWN	SEDIMENTARY	UNKNOWN	UNKNOWN	DOLOMITE																							0.3	100			2
D163680		USGS		Geochemistry of rock samples from the National Geochemical Database: U.S. Geological Survey, Reston, VA.	U.S. Geological Survey	USGS		40.7167	-111.75	0.01	71	71	71	UNKNOWN	SEDIMENTARY	UNKNOWN	UNKNOWN	DOLOMITE																							0.15	50	15		15				7
D163681		USGS		Geochemistry of rock samples from the National Geochemical Database: U.S. Geological Survey, Reston, VA.	U.S. Geological Survey	USGS		40.7167	-111.75	0.01	71	71	71	UNKNOWN	SEDIMENTARY	UNKNOWN	UNKNOWN	DOLOMITE																							0.15	50	15		5
D163682		USGS		Geochemistry of rock samples from the National Geochemical Database: U.S. Geological Survey, Reston, VA.	U.S. Geological Survey	USGS		40.7167	-111.75	0.01	71	71	71	UNKNOWN	SEDIMENTARY	UNKNOWN	UNKNOWN	DOLOMITE																							0.2	50	20		3
D163683		USGS		Geochemistry of rock samples from the National Geochemical Database: U.S. Geological Survey, Reston, VA.	U.S. Geological Survey	USGS		40.7167	-111.75	0.01	71	71	71	UNKNOWN	SEDIMENTARY	UNKNOWN	UNKNOWN	DOLOMITE																							0.3	50	15		5
D163684		USGS		Geochemistry of rock samples from the National Geochemical Database: U.S. Geological Survey, Reston, VA.	U.S. Geological Survey	USGS		40.7167	-111.75	0.01	71	71	71	UNKNOWN	SEDIMENTARY	UNKNOWN	UNKNOWN	DOLOMITE																							0.3	50	15		7
D163685		USGS		Geochemistry of rock samples from the National Geochemical Database: U.S. Geological Survey, Reston, VA.	U.S. Geological Survey	USGS		40.7167	-111.75	0.01	71	71	71	UNKNOWN	SEDIMENTARY	UNKNOWN	UNKNOWN	DOLOMITE																							0.5	100	20		10
D163694		USGS		Geochemistry of rock samples from the National Geochemical Database: U.S. Geological Survey, Reston, VA.	U.S. Geological Survey	USGS		40.7167	-111.75	0.01	71	71	71	UNKNOWN	SEDIMENTARY	UNKNOWN	UNKNOWN	DOLOMITE																							0.3	70			2
D163695		USGS		Geochemistry of rock samples from the National Geochemical Database: U.S. Geological Survey, Reston, VA.	U.S. Geological Survey	USGS		40.7167	-111.75	0.01	71	71	71	UNKNOWN	SEDIMENTARY	UNKNOWN	UNKNOWN	DOLOMITE																							0.3	50			3
D163696		USGS		Geochemistry of rock samples from the National Geochemical Database: U.S. Geological Survey, Reston, VA.	U.S. Geological Survey	USGS		40.7167	-111.75	0.01	71	71	71	UNKNOWN	SEDIMENTARY	UNKNOWN	UNKNOWN	DOLOMITE																							0.7	100	10		5
D163719		USGS		Geochemistry of rock samples from the National Geochemical Database: U.S. Geological Survey, Reston, VA.	U.S. Geological Survey	USGS		41.05	-111.583	0.01	71	71	71	UNKNOWN	SEDIMENTARY	UNKNOWN	UNKNOWN	DOLOMITE																							0.5	70	30		15				1.5
D163730		USGS		Geochemistry of rock samples from the National Geochemical Database: U.S. Geological Survey, Reston, VA.	U.S. Geological Survey	USGS		41.6833	-111.083	0.01	71	71	71	UNKNOWN	SEDIMENTARY	UNKNOWN	UNKNOWN	DOLOMITE																							1.5	150	70		20
D163739		USGS		Geochemistry of rock samples from the National Geochemical Database: U.S. Geological Survey, Reston, VA.	U.S. Geological Survey	USGS		42.2167	-111.45	0.01	71	71	71	UNKNOWN	SEDIMENTARY	UNKNOWN	UNKNOWN	DOLOMITE																							0.15	100			3
D163794		USGS		Geochemistry of rock samples from the National Geochemical Database: U.S. Geological Survey, Reston, VA.	U.S. Geological Survey	USGS		43.4167	-111.417	0.01	71	71	71	UNKNOWN	SEDIMENTARY	UNKNOWN	UNKNOWN	DOLOMITE																							0.3	70	30		15
D163795		USGS		Geochemistry of rock samples from the National Geochemical Database: U.S. Geological Survey, Reston, VA.	U.S. Geological Survey	USGS		43.4167	-111.417	0.01	71	71	71	UNKNOWN	SEDIMENTARY	UNKNOWN	UNKNOWN	DOLOMITE																							0.15	70	20		7
D163797		USGS		Geochemistry of rock samples from the National Geochemical Database: U.S. Geological Survey, Reston, VA.	U.S. Geological Survey	USGS		43.4167	-111.417	0.01	71	71	71	UNKNOWN	SEDIMENTARY	UNKNOWN	UNKNOWN	DOLOMITE																							0.15	70	20		10
D164234		USGS		Geochemistry of rock samples from the National Geochemical Database: U.S. Geological Survey, Reston, VA.	U.S. Geological Survey	USGS		44.0664	-110.266	0.01	55	55	55	UNKNOWN	SEDIMENTARY	UNKNOWN	UNKNOWN	DOLOMITE																0.27							0.2	100			5
D164236		USGS		Geochemistry of rock samples from the National Geochemical Database: U.S. Geological Survey, Reston, VA.	U.S. Geological Survey	USGS		43.8764	-110.138	0.01	55	55	55	UNKNOWN	SEDIMENTARY	UNKNOWN	UNKNOWN	DOLOMITE																0.27							0.1	100
D164237		USGS		Geochemistry of rock samples from the National Geochemical Database: U.S. Geological Survey, Reston, VA.	U.S. Geological Survey	USGS		43.8764	-110.138	0.01	55	55	55	UNKNOWN	SEDIMENTARY	UNKNOWN	UNKNOWN	DOLOMITE																0.47							0.15	100
D164252		USGS		Geochemistry of rock samples from the National Geochemical Database: U.S. Geological Survey, Reston, VA.	U.S. Geological Survey	USGS		44.0228	-110.22	0.01	71	71	71	UNKNOWN	SEDIMENTARY	UNKNOWN	UNKNOWN	DOLOMITE																0.7							0.15	200			15
D164255		USGS		Geochemistry of rock samples from the National Geochemical Database: U.S. Geological Survey, Reston, VA.	U.S. Geological Survey	USGS		43.9517	-110.239	0.01	68	68	68	UNKNOWN	SEDIMENTARY	UNKNOWN	UNKNOWN	DOLOMITE																							0.07	70
D164256		USGS		Geochemistry of rock samples from the National Geochemical Database: U.S. Geological Survey, Reston, VA.	U.S. Geological Survey	USGS		43.9572	-110.231	0.01	68	68	68	UNKNOWN	SEDIMENTARY	UNKNOWN	UNKNOWN	DOLOMITE																							0.15	70			2
D164257		USGS		Geochemistry of rock samples from the National Geochemical Database: U.S. Geological Survey, Reston, VA.	U.S. Geological Survey	USGS		43.9572	-110.231	0.01	68	68	68	UNKNOWN	SEDIMENTARY	UNKNOWN	UNKNOWN	DOLOMITE																0.33							0.07	70
D164258		USGS		Geochemistry of rock samples from the National Geochemical Database: U.S. Geological Survey, Reston, VA.	U.S. Geological Survey	USGS		43.8819	-110.16	0.01	55	55	55	UNKNOWN	SEDIMENTARY	UNKNOWN	UNKNOWN	DOLOMITE																0.11							0.07	150			2
D164507		USGS		Geochemistry of rock samples from the National Geochemical Database: U.S. Geological Survey, Reston, VA.	U.S. Geological Survey	USGS		38.6333	-117	0.01	69	69	69	UNKNOWN	SEDIMENTARY	UNKNOWN	UNKNOWN	DOLOMITE																						1	0.3	150	10		3
D164573		USGS		Geochemistry of rock samples from the National Geochemical Database: U.S. Geological Survey, Reston, VA.	U.S. Geological Survey	USGS		38.125	-113.5	0.01	55	62	69	UNKNOWN	SEDIMENTARY	UNKNOWN	UNKNOWN	DOLOMITE																						0.05	0.1	70			2
D164574		USGS		Geochemistry of rock samples from the National Geochemical Database: U.S. Geological Survey, Reston, VA.	U.S. Geological Survey	USGS		38.125	-113.5	0.01	55	62	69	UNKNOWN	SEDIMENTARY	UNKNOWN	UNKNOWN	DOLOMITE																						0.002	0.015	50
D164575		USGS		Geochemistry of rock samples from the National Geochemical Database: U.S. Geological Survey, Reston, VA.	U.S. Geological Survey	USGS		38.125	-113.5	0.01	55	62	69	UNKNOWN	SEDIMENTARY	UNKNOWN	UNKNOWN	DOLOMITE																							0.03	30			1
D164576		USGS		Geochemistry of rock samples from the National Geochemical Database: U.S. Geological Survey, Reston, VA.	U.S. Geological Survey	USGS		38.125	-113.5	0.01	55	62	69	UNKNOWN	SEDIMENTARY	UNKNOWN	UNKNOWN	DOLOMITE																						0.3	0.05	30			1.5
D164577		USGS		Geochemistry of rock samples from the National Geochemical Database: U.S. Geological Survey, Reston, VA.	U.S. Geological Survey	USGS		38.125	-113.5	0.01	55	62	69	UNKNOWN	SEDIMENTARY	UNKNOWN	UNKNOWN	DOLOMITE																						0.02	0.015	30			1
D164578		USGS		Geochemistry of rock samples from the National Geochemical Database: U.S. Geological Survey, Reston, VA.	U.S. Geological Survey	USGS		38.125	-113.5	0.01	55	62	69	UNKNOWN	SEDIMENTARY	UNKNOWN	UNKNOWN	DOLOMITE																						0.5	0.07	50			3
D164579		USGS		Geochemistry of rock samples from the National Geochemical Database: U.S. Geological Survey, Reston, VA.	U.S. Geological Survey	USGS		38.125	-113.5	0.01	55	62	69	UNKNOWN	SEDIMENTARY	UNKNOWN	UNKNOWN	DOLOMITE																						0.5	0.02	30			2
D164580		USGS		Geochemistry of rock samples from the National Geochemical Database: U.S. Geological Survey, Reston, VA.	U.S. Geological Survey	USGS		38.125	-113.5	0.01	55	62	69	UNKNOWN	SEDIMENTARY	UNKNOWN	UNKNOWN	DOLOMITE																						0.005	0.03	70			1.5
D164581		USGS		Geochemistry of rock samples from the National Geochemical Database: U.S. Geological Survey, Reston, VA.	U.S. Geological Survey	USGS		38.125	-113.5	0.01	55	62	69	UNKNOWN	SEDIMENTARY	UNKNOWN	UNKNOWN	DOLOMITE																						0.007	0.03	30
D164582		USGS		Geochemistry of rock samples from the National Geochemical Database: U.S. Geological Survey, Reston, VA.	U.S. Geological Survey	USGS		38.125	-113.5	0.01	55	62	69	UNKNOWN	SEDIMENTARY	UNKNOWN	UNKNOWN	DOLOMITE																						0.03	0.03	30			1.5
D164583		USGS		Geochemistry of rock samples from the National Geochemical Database: U.S. Geological Survey, Reston, VA.	U.S. Geological Survey	USGS		38.125	-113.5	0.01	55	62	69	UNKNOWN	SEDIMENTARY	UNKNOWN	UNKNOWN	DOLOMITE																						0.02	0.03	50			1.5
D164590		USGS		Geochemistry of rock samples from the National Geochemical Database: U.S. Geological Survey, Reston, VA.	U.S. Geological Survey	USGS		38.125	-113.5	0.01	55	62	69	UNKNOWN	SEDIMENTARY	UNKNOWN	UNKNOWN	DOLOMITE																						0.07	0.5	1500	7		1.5
D164591		USGS		Geochemistry of rock samples from the National Geochemical Database: U.S. Geological Survey, Reston, VA.	U.S. Geological Survey	USGS		38.125	-113.5	0.01	55	62	69	UNKNOWN	SEDIMENTARY	UNKNOWN	UNKNOWN	DOLOMITE																						0.05	0.15	150			1.5
D164595		USGS		Geochemistry of rock samples from the National Geochemical Database: U.S. Geological Survey, Reston, VA.	U.S. Geological Survey	USGS		38.125	-113.5	0.01	55	62	69	UNKNOWN	SEDIMENTARY	UNKNOWN	UNKNOWN	DOLOMITE																						0.05	0.15	150			1.5
D167648		USGS		Geochemistry of rock samples from the National Geochemical Database: U.S. Geological Survey, Reston, VA.	U.S. Geological Survey	USGS		36.1333	-114.767	0.01	2	2	2	UNKNOWN	SEDIMENTARY	UNKNOWN	UNKNOWN	DOLOMITE																							0.2	100			2
D169802		USGS		Geochemistry of rock samples from the National Geochemical Database: U.S. Geological Survey, Reston, VA.	U.S. Geological Survey	USGS		44.7667	-112.3	0.01	71	71	71	UNKNOWN	SEDIMENTARY	UNKNOWN	UNKNOWN	DOLOMITE																						1.5	0.3	100	30		20		300
D172739		USGS		Geochemistry of rock samples from the National Geochemical Database: U.S. Geological Survey, Reston, VA.	U.S. Geological Survey	USGS		41.0528	-107.243	0.01	43	43	43	UNKNOWN	SEDIMENTARY	UNKNOWN	UNKNOWN	DOLOMITE																0.04						1	0.3	700			15
D173832		USGS		Geochemistry of rock samples from the National Geochemical Database: U.S. Geological Survey, Reston, VA.	U.S. Geological Survey	USGS		44.0917	-106.854	0.01	69	69	69	UNKNOWN	SEDIMENTARY	UNKNOWN	UNKNOWN	DOLOMITE											20.2	33.2		0.06									0.3	300			7
D173833		USGS		Geochemistry of rock samples from the National Geochemical Database: U.S. Geological Survey, Reston, VA.	U.S. Geological Survey	USGS		38.5972	-105.261	0.01	69	69	69	UNKNOWN	SEDIMENTARY	UNKNOWN	UNKNOWN	DOLOMITE											20.1	34.5		0.04									0.07	200	7		5
D173834		USGS		Geochemistry of rock samples from the National Geochemical Database: U.S. Geological Survey, Reston, VA.	U.S. Geological Survey	USGS		45.5958	-110.578	0.01	69	69	69	UNKNOWN	SEDIMENTARY	UNKNOWN	UNKNOWN	DOLOMITE											20.7	33.8		0.05									0.3	70			5
D173835		USGS		Geochemistry of rock samples from the National Geochemical Database: U.S. Geological Survey, Reston, VA.	U.S. Geological Survey	USGS		44.7778	-109.389	0.01	69	69	69	UNKNOWN	SEDIMENTARY	UNKNOWN	UNKNOWN	DOLOMITE		0.695									20.6	33.3		0.04									0.1	50			2
D173836		USGS		Geochemistry of rock samples from the National Geochemical Database: U.S. Geological Survey, Reston, VA.	U.S. Geological Survey	USGS		39.6	-116.281	0.01	69	69	69	UNKNOWN	SEDIMENTARY	UNKNOWN	UNKNOWN	DOLOMITE		7.57									19	29.9		0.04	0.0664								0.15	70	7		7
D173837		USGS		Geochemistry of rock samples from the National Geochemical Database: U.S. Geological Survey, Reston, VA.	U.S. Geological Survey	USGS		39.1569	-112.133	0.01	73	71	69	UNKNOWN	SEDIMENTARY	UNKNOWN	UNKNOWN	DOLOMITE											20.3	33.5		0.04									0.1	50
D173838		USGS		Geochemistry of rock samples from the National Geochemical Database: U.S. Geological Survey, Reston, VA.	U.S. Geological Survey	USGS		38.4792	-105.278	0.01	69	69	69	UNKNOWN	SEDIMENTARY	UNKNOWN	UNKNOWN	DOLOMITE											20.2	33.9		0.03									0.2	300	10		1.5
D173839		USGS		Geochemistry of rock samples from the National Geochemical Database: U.S. Geological Survey, Reston, VA.	U.S. Geological Survey	USGS		38.675	-112.597	0.01	73	71	69	UNKNOWN	SEDIMENTARY	UNKNOWN	UNKNOWN	DOLOMITE											20.2	33		0.04									0.15	70			7
D173840		USGS		Geochemistry of rock samples from the National Geochemical Database: U.S. Geological Survey, Reston, VA.	U.S. Geological Survey	USGS		44.4139	-103.693	0.01	69	69	69	UNKNOWN	SEDIMENTARY	UNKNOWN	UNKNOWN	DOLOMITE		2.43									18.1	34		0.03									0.7	500			3
D173841		USGS		Geochemistry of rock samples from the National Geochemical Database: U.S. Geological Survey, Reston, VA.	U.S. Geological Survey	USGS		36.1111	-116.167	0.01	69	69	69	UNKNOWN	SEDIMENTARY	UNKNOWN	UNKNOWN	DOLOMITE											20.9	33.1		0.04									0.03	50
D173842		USGS		Geochemistry of rock samples from the National Geochemical Database: U.S. Geological Survey, Reston, VA.	U.S. Geological Survey	USGS		44.7778	-109.389	0.01	69	69	69	UNKNOWN	SEDIMENTARY	UNKNOWN	UNKNOWN	DOLOMITE											20.5	33.2		0.04									0.15	70
D173843		USGS		Geochemistry of rock samples from the National Geochemical Database: U.S. Geological Survey, Reston, VA.	U.S. Geological Survey	USGS		44.1375	-113.156	0.01	69	69	69	UNKNOWN	SEDIMENTARY	UNKNOWN	UNKNOWN	DOLOMITE											20.4	33.1		0.05									0.3	300
D173844		USGS		Geochemistry of rock samples from the National Geochemical Database: U.S. Geological Survey, Reston, VA.	U.S. Geological Survey	USGS		47.8875	-108.621	0.01	69	69	69	UNKNOWN	SEDIMENTARY	UNKNOWN	UNKNOWN	DOLOMITE											20.2	33.5		0.04									0.3	200			5
D173845		USGS		Geochemistry of rock samples from the National Geochemical Database: U.S. Geological Survey, Reston, VA.	U.S. Geological Survey	USGS		38.575	-114.838	0.01	73	73	73	UNKNOWN	SEDIMENTARY	UNKNOWN	UNKNOWN	DOLOMITE		1.37									20.6	31.8		0.05									0.2	30
D173847		USGS		Geochemistry of rock samples from the National Geochemical Database: U.S. Geological Survey, Reston, VA.	U.S. Geological Survey	USGS		48.0167	-108.594	0.01				UNKNOWN	SEDIMENTARY	UNKNOWN	UNKNOWN	DOLOMITE											20.7	32.6		0.04									0.3	70			2
D173848		USGS		Geochemistry of rock samples from the National Geochemical Database: U.S. Geological Survey, Reston, VA.	U.S. Geological Survey	USGS		39.7556	-113.199	0.01	73	71	69	UNKNOWN	SEDIMENTARY	UNKNOWN	UNKNOWN	DOLOMITE		2.28									20.5	32.2		0.04									0.2	50
D173849		USGS		Geochemistry of rock samples from the National Geochemical Database: U.S. Geological Survey, Reston, VA.	U.S. Geological Survey	USGS		44.0639	-106.854	0.01	69	69	69	UNKNOWN	SEDIMENTARY	UNKNOWN	UNKNOWN	DOLOMITE											18.7	34.9		0.07									0.1	100			1.5
D173850		USGS		Geochemistry of rock samples from the National Geochemical Database: U.S. Geological Survey, Reston, VA.	U.S. Geological Survey	USGS		44.5	-104.371	0.01	69	69	69	UNKNOWN	SEDIMENTARY	UNKNOWN	UNKNOWN	DOLOMITE											19.4	34.6		0.06									0.3	200			2
D173851		USGS		Geochemistry of rock samples from the National Geochemical Database: U.S. Geological Survey, Reston, VA.	U.S. Geological Survey	USGS		36.0583	-116.042	0.01	69	69	69	UNKNOWN	SEDIMENTARY	UNKNOWN	UNKNOWN	DOLOMITE											20.5	33.1		0.06									0.07	30
D173852		USGS		Geochemistry of rock samples from the National Geochemical Database: U.S. Geological Survey, Reston, VA.	U.S. Geological Survey	USGS		43.4083	-108.179	0.01	69	69	69	UNKNOWN	SEDIMENTARY	UNKNOWN	UNKNOWN	DOLOMITE		4.96		0.75							18.8	31.1		0.06	0.425								0.5	300			3
D173853		USGS		Geochemistry of rock samples from the National Geochemical Database: U.S. Geological Survey, Reston, VA.	U.S. Geological Survey	USGS		38.575	-114.838	0.01	73	73	73	UNKNOWN	SEDIMENTARY	UNKNOWN	UNKNOWN	DOLOMITE											20.9	32.8		0.04									0.05	70
D173854		USGS		Geochemistry of rock samples from the National Geochemical Database: U.S. Geological Survey, Reston, VA.	U.S. Geological Survey	USGS		37.4083	-115.467	0.01	73	73	73	UNKNOWN	SEDIMENTARY	UNKNOWN	UNKNOWN	DOLOMITE											19.6	35.3		0.05									0.02	70
D173855		USGS		Geochemistry of rock samples from the National Geochemical Database: U.S. Geological Survey, Reston, VA.	U.S. Geological Survey	USGS		44.0917	-113.338	0.01	69	69	69	UNKNOWN	SEDIMENTARY	UNKNOWN	UNKNOWN	DOLOMITE											16	33.1		0.03									0.2	150			3
D173856		USGS		Geochemistry of rock samples from the National Geochemical Database: U.S. Geological Survey, Reston, VA.	U.S. Geological Survey	USGS		41.7417	-111.742	0.01	69	69	69	UNKNOWN	SEDIMENTARY	UNKNOWN	UNKNOWN	DOLOMITE											20.4	32.5		0.03									0.05	50
D173857		USGS		Geochemistry of rock samples from the National Geochemical Database: U.S. Geological Survey, Reston, VA.	U.S. Geological Survey	USGS		45.3222	-108.575	0.01	69	69	69	UNKNOWN	SEDIMENTARY	UNKNOWN	UNKNOWN	DOLOMITE											18.9	33.9		0.05									0.15	50
D173859		USGS		Geochemistry of rock samples from the National Geochemical Database: U.S. Geological Survey, Reston, VA.	U.S. Geological Survey	USGS		47.8333	-108.55	0.01	69	69	69	UNKNOWN	SEDIMENTARY	UNKNOWN	UNKNOWN	DOLOMITE											20.5	33.1		0.02									0.2	150
D173860		USGS		Geochemistry of rock samples from the National Geochemical Database: U.S. Geological Survey, Reston, VA.	U.S. Geological Survey	USGS		36.5736	-117.081	0.01	69	69	69	UNKNOWN	SEDIMENTARY	UNKNOWN	UNKNOWN	DOLOMITE		8.48									14.8	29.5		0.04	0.376								0.3	200			3
D173861		USGS		Geochemistry of rock samples from the National Geochemical Database: U.S. Geological Survey, Reston, VA.	U.S. Geological Survey	USGS		38.675	-112.597	0.01	73	71	69	UNKNOWN	SEDIMENTARY	UNKNOWN	UNKNOWN	DOLOMITE		4.01									19.7	31.2		0.03									0.15	70			1.5
D173862		USGS		Geochemistry of rock samples from the National Geochemical Database: U.S. Geological Survey, Reston, VA.	U.S. Geological Survey	USGS		39.4194	-116.188	0.01	73	73	73	UNKNOWN	SEDIMENTARY	UNKNOWN	UNKNOWN	DOLOMITE											20.9	32.2		0.02									0.02	70
D173863		USGS		Geochemistry of rock samples from the National Geochemical Database: U.S. Geological Survey, Reston, VA.	U.S. Geological Survey	USGS		36.5958	-114.91	0.01	69	69	69	UNKNOWN	SEDIMENTARY	UNKNOWN	UNKNOWN	DOLOMITE											18.5	32.6		0.04									0.07	50
D173864		USGS		Geochemistry of rock samples from the National Geochemical Database: U.S. Geological Survey, Reston, VA.	U.S. Geological Survey	USGS		32.7	-108.183	0.01	69	69	69	UNKNOWN	SEDIMENTARY	UNKNOWN	UNKNOWN	DOLOMITE											20.7	33.1		0.05									0.5	300			1.5
D173865		USGS		Geochemistry of rock samples from the National Geochemical Database: U.S. Geological Survey, Reston, VA.	U.S. Geological Survey	USGS		36.3333	-116.983	0.01	55	64	73	UNKNOWN	SEDIMENTARY	UNKNOWN	UNKNOWN	DOLOMITE											18.4	31.9		0.05									0.1	70
D173866		USGS		Geochemistry of rock samples from the National Geochemical Database: U.S. Geological Survey, Reston, VA.	U.S. Geological Survey	USGS		44.1375	-113.156	0.01	69	69	69	UNKNOWN	SEDIMENTARY	UNKNOWN	UNKNOWN	DOLOMITE											21.1	32.3		0.04									0.2	300	5	7	7
D173867		USGS		Geochemistry of rock samples from the National Geochemical Database: U.S. Geological Survey, Reston, VA.	U.S. Geological Survey	USGS		41.3417	-116.01	0.01	73	73	73	UNKNOWN	SEDIMENTARY	UNKNOWN	UNKNOWN	DOLOMITE		1.61									20.2	32.3		0.02									0.07	100
D173868		USGS		Geochemistry of rock samples from the National Geochemical Database: U.S. Geological Survey, Reston, VA.	U.S. Geological Survey	USGS		44.1833	-106.85	0.01	69	69	69	UNKNOWN	SEDIMENTARY	UNKNOWN	UNKNOWN	DOLOMITE		2.05									16.7	31.5		0.06	0.0746								0.3	150			2
D173869		USGS		Geochemistry of rock samples from the National Geochemical Database: U.S. Geological Survey, Reston, VA.	U.S. Geological Survey	USGS		42.5819	-108.678	0.01	69	69	69	UNKNOWN	SEDIMENTARY	UNKNOWN	UNKNOWN	DOLOMITE											19.2	32.7		0.04									0.2	100
D173870		USGS		Geochemistry of rock samples from the National Geochemical Database: U.S. Geological Survey, Reston, VA.	U.S. Geological Survey	USGS		38.9	-113.45	0.01	73	73	73	UNKNOWN	SEDIMENTARY	UNKNOWN	UNKNOWN	DOLOMITE											20.7	33.1		0.05									0.015	20
D173871		USGS		Geochemistry of rock samples from the National Geochemical Database: U.S. Geological Survey, Reston, VA.	U.S. Geological Survey	USGS		36.6083	-114.907	0.01	69	69	69	UNKNOWN	SEDIMENTARY	UNKNOWN	UNKNOWN	DOLOMITE											20.5	32.4		0.04									0.02	30
D173872		USGS		Geochemistry of rock samples from the National Geochemical Database: U.S. Geological Survey, Reston, VA.	U.S. Geological Survey	USGS		44.1333	-113.321	0.01	73	73	73	UNKNOWN	SEDIMENTARY	UNKNOWN	UNKNOWN	DOLOMITE											21	32.7											0.3	150
D173873		USGS		Geochemistry of rock samples from the National Geochemical Database: U.S. Geological Survey, Reston, VA.	U.S. Geological Survey	USGS		45.575	-110.558	0.01	69	69	69	UNKNOWN	SEDIMENTARY	UNKNOWN	UNKNOWN	DOLOMITE											21.1	32.3											0.3	70
D173874		USGS		Geochemistry of rock samples from the National Geochemical Database: U.S. Geological Survey, Reston, VA.	U.S. Geological Survey	USGS		38.6139	-105.221	0.01	69	69	69	UNKNOWN	SEDIMENTARY	UNKNOWN	UNKNOWN	DOLOMITE											20.9	32											0.3	300			3
D173875		USGS		Geochemistry of rock samples from the National Geochemical Database: U.S. Geological Survey, Reston, VA.	U.S. Geological Survey	USGS		38.2819	-105.858	0.01	69	69	69	UNKNOWN	SEDIMENTARY	UNKNOWN	UNKNOWN	DOLOMITE		0.613									20.7	32.2											0.3	200			3
D173876		USGS		Geochemistry of rock samples from the National Geochemical Database: U.S. Geological Survey, Reston, VA.	U.S. Geological Survey	USGS		41.8917	-111.681	0.01	73	73	73	UNKNOWN	SEDIMENTARY	UNKNOWN	UNKNOWN	DOLOMITE											21.3	31											0.15	30
D173878		USGS		Geochemistry of rock samples from the National Geochemical Database: U.S. Geological Survey, Reston, VA.	U.S. Geological Survey	USGS		38.3056	-105.865	0.01	69	69	69	UNKNOWN	SEDIMENTARY	UNKNOWN	UNKNOWN	DOLOMITE		0.668									20.7	31.7											0.2	100			3
D173879		USGS		Geochemistry of rock samples from the National Geochemical Database: U.S. Geological Survey, Reston, VA.	U.S. Geological Survey	USGS		32.7139	-108.197	0.01	69	69	69	UNKNOWN	SEDIMENTARY	UNKNOWN	UNKNOWN	DOLOMITE		6.9									18.8	29.5			0.101								0.5	1500			7
D173880		USGS		Geochemistry of rock samples from the National Geochemical Database: U.S. Geological Survey, Reston, VA.	U.S. Geological Survey	USGS		38.6139	-105.221	0.01	69	69	69	UNKNOWN	SEDIMENTARY	UNKNOWN	UNKNOWN	DOLOMITE											20.5	32.1											0.5	300			2
D173881		USGS		Geochemistry of rock samples from the National Geochemical Database: U.S. Geological Survey, Reston, VA.	U.S. Geological Survey	USGS		32.85	-105.912	0.01	69	69	69	UNKNOWN	SEDIMENTARY	UNKNOWN	UNKNOWN	DOLOMITE		1.54									20.5	32											0.3	150
D173883		USGS		Geochemistry of rock samples from the National Geochemical Database: U.S. Geological Survey, Reston, VA.	U.S. Geological Survey	USGS		41.0278	-113.358	0.01	73	73	73	UNKNOWN	SEDIMENTARY	UNKNOWN	UNKNOWN	DOLOMITE		13	0.137	0.545							20.7	45.7			0.439								0.15	50
D173884		USGS		Geochemistry of rock samples from the National Geochemical Database: U.S. Geological Survey, Reston, VA.	U.S. Geological Survey	USGS		44.3736	-103.917	0.01	69	69	69	UNKNOWN	SEDIMENTARY	UNKNOWN	UNKNOWN	DOLOMITE		5.12									17.4	31.2			0.104								1.5	700	7		5
D173885		USGS		Geochemistry of rock samples from the National Geochemical Database: U.S. Geological Survey, Reston, VA.	U.S. Geological Survey	USGS		43.6736	-110.954	0.01	69	69	69	UNKNOWN	SEDIMENTARY	UNKNOWN	UNKNOWN	DOLOMITE											20.9	32											0.15	50
D173886		USGS		Geochemistry of rock samples from the National Geochemical Database: U.S. Geological Survey, Reston, VA.	U.S. Geological Survey	USGS		32.7	-108.183	0.01	73	73	73	UNKNOWN	SEDIMENTARY	UNKNOWN	UNKNOWN	DOLOMITE		3.03									20	31.1											0.5	700			5				10
D173887		USGS		Geochemistry of rock samples from the National Geochemical Database: U.S. Geological Survey, Reston, VA.	U.S. Geological Survey	USGS		38.825	-106.857	0.01	69	69	69	UNKNOWN	SEDIMENTARY	UNKNOWN	UNKNOWN	DOLOMITE											19.9	32.6											0.3	150			3
D173888		USGS		Geochemistry of rock samples from the National Geochemical Database: U.S. Geological Survey, Reston, VA.	U.S. Geological Survey	USGS		42.6792	-111.696	0.01	69	69	69	UNKNOWN	SEDIMENTARY	UNKNOWN	UNKNOWN	DOLOMITE		0.56									20.7	31.7											0.07	50
D173889		USGS		Geochemistry of rock samples from the National Geochemical Database: U.S. Geological Survey, Reston, VA.	U.S. Geological Survey	USGS		32.9292	-107.229	0.01	69	69	69	UNKNOWN	SEDIMENTARY	UNKNOWN	UNKNOWN	DOLOMITE		14.6		0.929							16.3	27.5			0.52								1	700	7		5
D173890		USGS		Geochemistry of rock samples from the National Geochemical Database: U.S. Geological Survey, Reston, VA.	U.S. Geological Survey	USGS		38.4694	-114.967	0.01	73	73	73	UNKNOWN	SEDIMENTARY	UNKNOWN	UNKNOWN	DOLOMITE											21.1	32.1											0.03	30
D173891		USGS		Geochemistry of rock samples from the National Geochemical Database: U.S. Geological Survey, Reston, VA.	U.S. Geological Survey	USGS		36.825	-118.075	0.01	69	69	69	UNKNOWN	SEDIMENTARY	UNKNOWN	UNKNOWN	DOLOMITE		0.665									20.2	32.4											0.15	300
D173893		USGS		Geochemistry of rock samples from the National Geochemical Database: U.S. Geological Survey, Reston, VA.	U.S. Geological Survey	USGS		37.3806	-115.392	0.01	73	73	73	UNKNOWN	SEDIMENTARY	UNKNOWN	UNKNOWN	DOLOMITE											21.1	33.1											0.03	30
D173894		USGS		Geochemistry of rock samples from the National Geochemical Database: U.S. Geological Survey, Reston, VA.	U.S. Geological Survey	USGS		39.75	-115.025	0.01	73	71	69	UNKNOWN	SEDIMENTARY	UNKNOWN	UNKNOWN	DOLOMITE											21.3	33.3											0.03	50
D173895		USGS		Geochemistry of rock samples from the National Geochemical Database: U.S. Geological Survey, Reston, VA.	U.S. Geological Survey	USGS		47.8875	-108.621	0.01	69	69	69	UNKNOWN	SEDIMENTARY	UNKNOWN	UNKNOWN	DOLOMITE		3.02									15.2	37.5			0.359								0.7	150	7		3
D173896		USGS		Geochemistry of rock samples from the National Geochemical Database: U.S. Geological Survey, Reston, VA.	U.S. Geological Survey	USGS		38.7569	-112.465	0.01	73	71	69	UNKNOWN	SEDIMENTARY	UNKNOWN	UNKNOWN	DOLOMITE		0.626									20.3	32.2											0.15	30
D173897		USGS		Geochemistry of rock samples from the National Geochemical Database: U.S. Geological Survey, Reston, VA.	U.S. Geological Survey	USGS		38.4792	-105.278	0.01	69	69	69	UNKNOWN	SEDIMENTARY	UNKNOWN	UNKNOWN	DOLOMITE											20.2	32.9											0.15	300			5
D173898		USGS		Geochemistry of rock samples from the National Geochemical Database: U.S. Geological Survey, Reston, VA.	U.S. Geological Survey	USGS		44.8569	-109.307	0.01	69	69	69	UNKNOWN	SEDIMENTARY	UNKNOWN	UNKNOWN	DOLOMITE											19.9	33.9											0.2	50
D173899		USGS		Geochemistry of rock samples from the National Geochemical Database: U.S. Geological Survey, Reston, VA.	U.S. Geological Survey	USGS		38.2347	-106.043	0.01	69	69	69	UNKNOWN	SEDIMENTARY	UNKNOWN	UNKNOWN	DOLOMITE		8.46									18.8	29.5			0.259								0.5	500
D173900		USGS		Geochemistry of rock samples from the National Geochemical Database: U.S. Geological Survey, Reston, VA.	U.S. Geological Survey	USGS		41.7722	-111.75	0.01	73	73	73	UNKNOWN	SEDIMENTARY	UNKNOWN	UNKNOWN	DOLOMITE		1.05									20.8	32.3											0.15	70			3
D173901		USGS		Geochemistry of rock samples from the National Geochemical Database: U.S. Geological Survey, Reston, VA.	U.S. Geological Survey	USGS		42.7139	-108.853	0.01	69	69	69	UNKNOWN	SEDIMENTARY	UNKNOWN	UNKNOWN	DOLOMITE											19.5	33.9											0.2	150			3
D173902		USGS		Geochemistry of rock samples from the National Geochemical Database: U.S. Geological Survey, Reston, VA.	U.S. Geological Survey	USGS		44.7597	-109.394	0.01	69	69	69	UNKNOWN	SEDIMENTARY	UNKNOWN	UNKNOWN	DOLOMITE											20.3	33											0.2	30
D173903		USGS		Geochemistry of rock samples from the National Geochemical Database: U.S. Geological Survey, Reston, VA.	U.S. Geological Survey	USGS		38.7569	-112.485	0.01	73	71	69	UNKNOWN	SEDIMENTARY	UNKNOWN	UNKNOWN	DOLOMITE		0.723									20.7	32.3											0.15	70			3
D173904		USGS		Geochemistry of rock samples from the National Geochemical Database: U.S. Geological Survey, Reston, VA.	U.S. Geological Survey	USGS		38.8042	-113.594	0.01	69	69	69	UNKNOWN	SEDIMENTARY	UNKNOWN	UNKNOWN	DOLOMITE		2.75									20	31.1			0.117								0.3	30
D173905		USGS		Geochemistry of rock samples from the National Geochemical Database: U.S. Geological Survey, Reston, VA.	U.S. Geological Survey	USGS		44.1333	-113.321	0.01	73	73	73	UNKNOWN	SEDIMENTARY	UNKNOWN	UNKNOWN	DOLOMITE											20.4	33											0.5	200			3
D173906		USGS		Geochemistry of rock samples from the National Geochemical Database: U.S. Geological Survey, Reston, VA.	U.S. Geological Survey	USGS		39.8611	-113.425	0.01	73	73	73	UNKNOWN	SEDIMENTARY	UNKNOWN	UNKNOWN	DOLOMITE											20.9	31.8											0.1	100
D173907		USGS		Geochemistry of rock samples from the National Geochemical Database: U.S. Geological Survey, Reston, VA.	U.S. Geological Survey	USGS		38.4694	-114.967	0.01	73	73	73	UNKNOWN	SEDIMENTARY	UNKNOWN	UNKNOWN	DOLOMITE											20.9	32.3											0.07	30
D173908		USGS		Geochemistry of rock samples from the National Geochemical Database: U.S. Geological Survey, Reston, VA.	U.S. Geological Survey	USGS		42.7375	-108.825	0.01	69	69	69	UNKNOWN	SEDIMENTARY	UNKNOWN	UNKNOWN	DOLOMITE											21	32.2											0.3	100
D173909		USGS		Geochemistry of rock samples from the National Geochemical Database: U.S. Geological Survey, Reston, VA.	U.S. Geological Survey	USGS		41.9042	-111.646	0.01	73	73	73	UNKNOWN	SEDIMENTARY	UNKNOWN	UNKNOWN	DOLOMITE											21.1	33											0.1	50
D173911		USGS		Geochemistry of rock samples from the National Geochemical Database: U.S. Geological Survey, Reston, VA.	U.S. Geological Survey	USGS		39.2431	-112.19	0.01	73	71	69	UNKNOWN	SEDIMENTARY	UNKNOWN	UNKNOWN	DOLOMITE											20.2	33.9											0.07	70
D173912		USGS		Geochemistry of rock samples from the National Geochemical Database: U.S. Geological Survey, Reston, VA.	U.S. Geological Survey	USGS		39.6333	-114.942	0.01	73	71	69	UNKNOWN	SEDIMENTARY	UNKNOWN	UNKNOWN	DOLOMITE		3.69									20.6	32.9											0.07	50
D173913		USGS		Geochemistry of rock samples from the National Geochemical Database: U.S. Geological Survey, Reston, VA.	U.S. Geological Survey	USGS		42.7139	-108.853	0.01	69	69	69	UNKNOWN	SEDIMENTARY	UNKNOWN	UNKNOWN	DOLOMITE											19.8	35.4											0.15	100
D173914		USGS		Geochemistry of rock samples from the National Geochemical Database: U.S. Geological Survey, Reston, VA.	U.S. Geological Survey	USGS		44.8486	-107.35	0.01	69	69	69	UNKNOWN	SEDIMENTARY	UNKNOWN	UNKNOWN	DOLOMITE		0.803									20.4	33.5											0.3	70
D173915		USGS		Geochemistry of rock samples from the National Geochemical Database: U.S. Geological Survey, Reston, VA.	U.S. Geological Survey	USGS		38.4472	-105.267	0.01	69	69	69	UNKNOWN	SEDIMENTARY	UNKNOWN	UNKNOWN	DOLOMITE											21.2	34.5											0.15	200
D173916		USGS		Geochemistry of rock samples from the National Geochemical Database: U.S. Geological Survey, Reston, VA.	U.S. Geological Survey	USGS		38.825	-106.857	0.01	69	69	69	UNKNOWN	SEDIMENTARY	UNKNOWN	UNKNOWN	DOLOMITE											20	32.5			0.0832								1	500
D173917		USGS		Geochemistry of rock samples from the National Geochemical Database: U.S. Geological Survey, Reston, VA.	U.S. Geological Survey	USGS		44.9222	-109.299	0.01	69	69	69	UNKNOWN	SEDIMENTARY	UNKNOWN	UNKNOWN	DOLOMITE		1.37									20.4	33.3											0.15	50
D173918		USGS		Geochemistry of rock samples from the National Geochemical Database: U.S. Geological Survey, Reston, VA.	U.S. Geological Survey	USGS		33.025	-107.233	0.01	69	69	69	UNKNOWN	SEDIMENTARY	UNKNOWN	UNKNOWN	DOLOMITE		6.58	0.0509	1							16.9	33.3			0.519								0.7	700
D173920		USGS		Geochemistry of rock samples from the National Geochemical Database: U.S. Geological Survey, Reston, VA.	U.S. Geological Survey	USGS		45.5958	-110.411	0.01	69	69	69	UNKNOWN	SEDIMENTARY	UNKNOWN	UNKNOWN	DOLOMITE											21	33.3											0.2	30
D173921		USGS		Geochemistry of rock samples from the National Geochemical Database: U.S. Geological Survey, Reston, VA.	U.S. Geological Survey	USGS		44.0917	-113.338	0.01	73	71	69	UNKNOWN	SEDIMENTARY	UNKNOWN	UNKNOWN	DOLOMITE											20.7	34			0.0305								0.3	70
D173922		USGS		Geochemistry of rock samples from the National Geochemical Database: U.S. Geological Survey, Reston, VA.	U.S. Geological Survey	USGS		37.4083	-115.467	0.01	73	73	73	UNKNOWN	SEDIMENTARY	UNKNOWN	UNKNOWN	DOLOMITE		17									17.8	28.9											0.07	30
D173924		USGS		Geochemistry of rock samples from the National Geochemical Database: U.S. Geological Survey, Reston, VA.	U.S. Geological Survey	USGS		43.5347	-109.29	0.01	69	69	69	UNKNOWN	SEDIMENTARY	UNKNOWN	UNKNOWN	DOLOMITE											20.6	33.4											0.15	70
D173925		USGS		Geochemistry of rock samples from the National Geochemical Database: U.S. Geological Survey, Reston, VA.	U.S. Geological Survey	USGS		42.7375	-108.825	0.01	69	69	69	UNKNOWN	SEDIMENTARY	UNKNOWN	UNKNOWN	DOLOMITE											20.9	33.8											0.3	150
D173926		USGS		Geochemistry of rock samples from the National Geochemical Database: U.S. Geological Survey, Reston, VA.	U.S. Geological Survey	USGS		43.5208	-107.9	0.01	69	69	69	UNKNOWN	SEDIMENTARY	UNKNOWN	UNKNOWN	DOLOMITE											20.3	35.4											0.15	200
D173928		USGS		Geochemistry of rock samples from the National Geochemical Database: U.S. Geological Survey, Reston, VA.	U.S. Geological Survey	USGS		42.5819	-108.678	0.01	69	69	69	UNKNOWN	SEDIMENTARY	UNKNOWN	UNKNOWN	DOLOMITE											20.4	34.1											0.15	150
D173929		USGS		Geochemistry of rock samples from the National Geochemical Database: U.S. Geological Survey, Reston, VA.	U.S. Geological Survey	USGS		39.7194	-115.05	0.01	73	71	69	UNKNOWN	SEDIMENTARY	UNKNOWN	UNKNOWN	DOLOMITE											20.8	34.1											0.07	20
D173930		USGS		Geochemistry of rock samples from the National Geochemical Database: U.S. Geological Survey, Reston, VA.	U.S. Geological Survey	USGS		38.6625	-112.653	0.01	73	71	69	UNKNOWN	SEDIMENTARY	UNKNOWN	UNKNOWN	DOLOMITE											19	35.8											0.2	70
D173931		USGS		Geochemistry of rock samples from the National Geochemical Database: U.S. Geological Survey, Reston, VA.	U.S. Geological Survey	USGS		39.2583	-112.175	0.01	73	71	69	UNKNOWN	SEDIMENTARY	UNKNOWN	UNKNOWN	DOLOMITE											19.6	35.3											0.07	15
D173932		USGS		Geochemistry of rock samples from the National Geochemical Database: U.S. Geological Survey, Reston, VA.	U.S. Geological Survey	USGS		44.3889	-103.703	0.01	69	69	69	UNKNOWN	SEDIMENTARY	UNKNOWN	UNKNOWN	DOLOMITE		5.39									18.7	31.5			0.109								2	700			2
D173933		USGS		Geochemistry of rock samples from the National Geochemical Database: U.S. Geological Survey, Reston, VA.	U.S. Geological Survey	USGS		36.6958	-114.886	0.01	69	69	69	UNKNOWN	SEDIMENTARY	UNKNOWN	UNKNOWN	DOLOMITE											21.3	33.6											0.07	30
D173934		USGS		Geochemistry of rock samples from the National Geochemical Database: U.S. Geological Survey, Reston, VA.	U.S. Geological Survey	USGS		44.6875	-107.196	0.01	69	69	69	UNKNOWN	SEDIMENTARY	UNKNOWN	UNKNOWN	DOLOMITE											21.1	32.9											0.15	50
D173935		USGS		Geochemistry of rock samples from the National Geochemical Database: U.S. Geological Survey, Reston, VA.	U.S. Geological Survey	USGS		38.2375	-106.043	0.01	69	69	69	UNKNOWN	SEDIMENTARY	UNKNOWN	UNKNOWN	DOLOMITE		7.81									16.7	31			0.268								0.5	700			7
D173936		USGS		Geochemistry of rock samples from the National Geochemical Database: U.S. Geological Survey, Reston, VA.	U.S. Geological Survey	USGS		42.6986	-111.733	0.01	69	69	69	UNKNOWN	SEDIMENTARY	UNKNOWN	UNKNOWN	DOLOMITE											21.1	32.1											0.15	70			2
D173938		USGS		Geochemistry of rock samples from the National Geochemical Database: U.S. Geological Survey, Reston, VA.	U.S. Geological Survey	USGS		33.025	-107.233	0.01	69	69	69	UNKNOWN	SEDIMENTARY	UNKNOWN	UNKNOWN	DOLOMITE		1.14									6.75	55.2											0.7	3000			3
D173939		USGS		Geochemistry of rock samples from the National Geochemical Database: U.S. Geological Survey, Reston, VA.	U.S. Geological Survey	USGS		39.3833	-116.133	0.01	69	69	69	UNKNOWN	SEDIMENTARY	UNKNOWN	UNKNOWN	DOLOMITE		0.53									20.4	33.9			0.0678								0.15	200			2
D173940		USGS		Geochemistry of rock samples from the National Geochemical Database: U.S. Geological Survey, Reston, VA.	U.S. Geological Survey	USGS		44.1083	-113.122	0.01	69	69	69	UNKNOWN	SEDIMENTARY	UNKNOWN	UNKNOWN	DOLOMITE											21	33.3											0.5	300			7
D173941		USGS		Geochemistry of rock samples from the National Geochemical Database: U.S. Geological Survey, Reston, VA.	U.S. Geological Survey	USGS		32.75	-107.208	0.01	69	69	69	UNKNOWN	SEDIMENTARY	UNKNOWN	UNKNOWN	DOLOMITE		6.14									18.9	31.6			0.0443								0.7	700			3
D173942		USGS		Geochemistry of rock samples from the National Geochemical Database: U.S. Geological Survey, Reston, VA.	U.S. Geological Survey	USGS		41.1528	-113.375	0.01	73	73	73	UNKNOWN	SEDIMENTARY	UNKNOWN	UNKNOWN	DOLOMITE		2.27									20.4	32.4			0.117								0.2	150			5
D173943		USGS		Geochemistry of rock samples from the National Geochemical Database: U.S. Geological Survey, Reston, VA.	U.S. Geological Survey	USGS		44.0639	-106.854	0.01	69	69	69	UNKNOWN	SEDIMENTARY	UNKNOWN	UNKNOWN	DOLOMITE		1.91									20.6	32.1			0.0688								0.3	150			2
D173944		USGS		Geochemistry of rock samples from the National Geochemical Database: U.S. Geological Survey, Reston, VA.	U.S. Geological Survey	USGS		44.8083	-107.35	0.01	69	69	69	UNKNOWN	SEDIMENTARY	UNKNOWN	UNKNOWN	DOLOMITE		1.54									20.6	32.4											0.15	70
D173945		USGS		Geochemistry of rock samples from the National Geochemical Database: U.S. Geological Survey, Reston, VA.	U.S. Geological Survey	USGS		36.3069	-116.967	0.01	69	69	69	UNKNOWN	SEDIMENTARY	UNKNOWN	UNKNOWN	DOLOMITE											21	32.8											0.1	70
D173946		USGS		Geochemistry of rock samples from the National Geochemical Database: U.S. Geological Survey, Reston, VA.	U.S. Geological Survey	USGS		44.8569	-109.307	0.01	69	69	69	UNKNOWN	SEDIMENTARY	UNKNOWN	UNKNOWN	DOLOMITE		0.722									20.2	32.6											0.5	30
D173947		USGS		Geochemistry of rock samples from the National Geochemical Database: U.S. Geological Survey, Reston, VA.	U.S. Geological Survey	USGS		45.1861	-108.353	0.01	69	69	69	UNKNOWN	SEDIMENTARY	UNKNOWN	UNKNOWN	DOLOMITE		4.79									15.4	36.6			0.0429								0.3	30
D173948		USGS		Geochemistry of rock samples from the National Geochemical Database: U.S. Geological Survey, Reston, VA.	U.S. Geological Survey	USGS		39.3833	-116.133	0.01	73	73	73	UNKNOWN	SEDIMENTARY	UNKNOWN	UNKNOWN	DOLOMITE											20.2	34.1											0.03	20
D173949		USGS		Geochemistry of rock samples from the National Geochemical Database: U.S. Geological Survey, Reston, VA.	U.S. Geological Survey	USGS		39.7194	-115.05	0.01	73	71	69	UNKNOWN	SEDIMENTARY	UNKNOWN	UNKNOWN	DOLOMITE											21.2	32.3											0.03	30
D173950		USGS		Geochemistry of rock samples from the National Geochemical Database: U.S. Geological Survey, Reston, VA.	U.S. Geological Survey	USGS		44.6625	-107.171	0.01	69	69	69	UNKNOWN	SEDIMENTARY	UNKNOWN	UNKNOWN	DOLOMITE											14.5	39.9											0.3	150
D173951		USGS		Geochemistry of rock samples from the National Geochemical Database: U.S. Geological Survey, Reston, VA.	U.S. Geological Survey	USGS		39.6	-116.281	0.01	73	73	73	UNKNOWN	SEDIMENTARY	UNKNOWN	UNKNOWN	DOLOMITE		1.08									20.5	32.4											0.15	70			3
D173952		USGS		Geochemistry of rock samples from the National Geochemical Database: U.S. Geological Survey, Reston, VA.	U.S. Geological Survey	USGS		44.4139	-103.693	0.01	69	69	69	UNKNOWN	SEDIMENTARY	UNKNOWN	UNKNOWN	DOLOMITE		4.87	0.0573								17.3	33.3		0.03	0.0518								1.5	700	7		5
D173953		USGS		Geochemistry of rock samples from the National Geochemical Database: U.S. Geological Survey, Reston, VA.	U.S. Geological Survey	USGS		36.9625	-118.094	0.01	69	69	69	UNKNOWN	SEDIMENTARY	UNKNOWN	UNKNOWN	DOLOMITE											20.6	34.1		0.03									0.2	150			2
D173954		USGS		Geochemistry of rock samples from the National Geochemical Database: U.S. Geological Survey, Reston, VA.	U.S. Geological Survey	USGS		44.4139	-103.693	0.01	69	69	69	UNKNOWN	SEDIMENTARY	UNKNOWN	UNKNOWN	DOLOMITE		1.98									17.9	34.9		0.1									1	300	7		5
D173955		USGS		Geochemistry of rock samples from the National Geochemical Database: U.S. Geological Survey, Reston, VA.	U.S. Geological Survey	USGS		37.3556	-115.392	0.01	73	73	73	UNKNOWN	SEDIMENTARY	UNKNOWN	UNKNOWN	DOLOMITE											20.9	34.3		0.03									0.05	70
D173956		USGS		Geochemistry of rock samples from the National Geochemical Database: U.S. Geological Survey, Reston, VA.	U.S. Geological Survey	USGS		43.5347	-109.29	0.01	69	69	69	UNKNOWN	SEDIMENTARY	UNKNOWN	UNKNOWN	DOLOMITE											20.7	32.6		0.03									0.3	150			3
D173957		USGS		Geochemistry of rock samples from the National Geochemical Database: U.S. Geological Survey, Reston, VA.	U.S. Geological Survey	USGS		44.5	-104.371	0.01	69	69	69	UNKNOWN	SEDIMENTARY	UNKNOWN	UNKNOWN	DOLOMITE											19.7	34.7		0.04									0.3	200			5
D173958		USGS		Geochemistry of rock samples from the National Geochemical Database: U.S. Geological Survey, Reston, VA.	U.S. Geological Survey	USGS		39.75	-115.025	0.01	73	71	69	UNKNOWN	SEDIMENTARY	UNKNOWN	UNKNOWN	DOLOMITE											21.3	34.5		0.03									0.015	30
D173959		USGS		Geochemistry of rock samples from the National Geochemical Database: U.S. Geological Survey, Reston, VA.	U.S. Geological Survey	USGS		44.8083	-107.35	0.01	69	69	69	UNKNOWN	SEDIMENTARY	UNKNOWN	UNKNOWN	DOLOMITE											19.5	35.6		0.06									0.1	70			3
D173960		USGS		Geochemistry of rock samples from the National Geochemical Database: U.S. Geological Survey, Reston, VA.	U.S. Geological Survey	USGS		36.3333	-116.983	0.01	69	69	69	UNKNOWN	SEDIMENTARY	UNKNOWN	UNKNOWN	DOLOMITE											20.7	34.2		0.04									0.07	50			10
D173961		USGS		Geochemistry of rock samples from the National Geochemical Database: U.S. Geological Survey, Reston, VA.	U.S. Geological Survey	USGS		38.2153	-106.036	0.01	69	69	69	UNKNOWN	SEDIMENTARY	UNKNOWN	UNKNOWN	DOLOMITE		0.764									20.8	34.3		0.03	0.0648								0.3	300			5
D173962		USGS		Geochemistry of rock samples from the National Geochemical Database: U.S. Geological Survey, Reston, VA.	U.S. Geological Survey	USGS		44.1083	-113.122	0.01	69	69	69	UNKNOWN	SEDIMENTARY	UNKNOWN	UNKNOWN	DOLOMITE											20.6	32.8		0.04									0.2	70
D173963		USGS		Geochemistry of rock samples from the National Geochemical Database: U.S. Geological Survey, Reston, VA.	U.S. Geological Survey	USGS		36.5722	-117.107	0.01	69	69	69	UNKNOWN	SEDIMENTARY	UNKNOWN	UNKNOWN	DOLOMITE											20.9	34		0.04									0.2	200			3
D173965		USGS		Geochemistry of rock samples from the National Geochemical Database: U.S. Geological Survey, Reston, VA.	U.S. Geological Survey	USGS		42.5819	-108.678	0.01	69	69	69	UNKNOWN	SEDIMENTARY	UNKNOWN	UNKNOWN	DOLOMITE											20.2	34.6		0.03									0.2	150			5
D173966		USGS		Geochemistry of rock samples from the National Geochemical Database: U.S. Geological Survey, Reston, VA.	U.S. Geological Survey	USGS		44.0917	-113.338	0.01	69	69	69	UNKNOWN	SEDIMENTARY	UNKNOWN	UNKNOWN	DOLOMITE		22.9	0.117	0.895							4.13	38		0.02	0.674								0.7	150	10		7
D173969		USGS		Geochemistry of rock samples from the National Geochemical Database: U.S. Geological Survey, Reston, VA.	U.S. Geological Survey	USGS		39.6333	-114.942	0.01	73	71	69	UNKNOWN	SEDIMENTARY	UNKNOWN	UNKNOWN	DOLOMITE											20.9	33.3		0.07									0.07	30
D173970		USGS		Geochemistry of rock samples from the National Geochemical Database: U.S. Geological Survey, Reston, VA.	U.S. Geological Survey	USGS		45.3222	-108.575	0.01	69	69	69	UNKNOWN	SEDIMENTARY	UNKNOWN	UNKNOWN	DOLOMITE		0.648									20.5	33.4		0.04									0.2	50			2
D173971		USGS		Geochemistry of rock samples from the National Geochemical Database: U.S. Geological Survey, Reston, VA.	U.S. Geological Survey	USGS		38.4472	-105.267	0.01	69	69	69	UNKNOWN	SEDIMENTARY	UNKNOWN	UNKNOWN	DOLOMITE											20.8	33.5		0.03									0.2	500			1.5
D173972		USGS		Geochemistry of rock samples from the National Geochemical Database: U.S. Geological Survey, Reston, VA.	U.S. Geological Survey	USGS		39.5833	-116.267	0.01	73	73	73	UNKNOWN	SEDIMENTARY	UNKNOWN	UNKNOWN	DOLOMITE											21.3	33.1		0.03									0.03	30
D173973		USGS		Geochemistry of rock samples from the National Geochemical Database: U.S. Geological Survey, Reston, VA.	U.S. Geological Survey	USGS		39.8611	-113.425	0.01	69	69	69	UNKNOWN	SEDIMENTARY	UNKNOWN	UNKNOWN	DOLOMITE		0.694									21	32.8		0.03									0.07	70			1.5
D173974		USGS		Geochemistry of rock samples from the National Geochemical Database: U.S. Geological Survey, Reston, VA.	U.S. Geological Survey	USGS		41.7722	-111.75	0.01	73	73	73	UNKNOWN	SEDIMENTARY	UNKNOWN	UNKNOWN	DOLOMITE											21.3	33.4		0.03									0.07	70
D173975		USGS		Geochemistry of rock samples from the National Geochemical Database: U.S. Geological Survey, Reston, VA.	U.S. Geological Survey	USGS		38.4792	-105.278	0.01	69	69	69	UNKNOWN	SEDIMENTARY	UNKNOWN	UNKNOWN	DOLOMITE											20.8	34.3		0.02									0.2	300			2
D173976		USGS		Geochemistry of rock samples from the National Geochemical Database: U.S. Geological Survey, Reston, VA.	U.S. Geological Survey	USGS		44.1667	-106.871	0.01	69	69	69	UNKNOWN	SEDIMENTARY	UNKNOWN	UNKNOWN	DOLOMITE		9.95									18.8	29.2		0.04									0.2	150			2
D173977		USGS		Geochemistry of rock samples from the National Geochemical Database: U.S. Geological Survey, Reston, VA.	U.S. Geological Survey	USGS		39.2583	-112.175	0.01	73	71	69	UNKNOWN	SEDIMENTARY	UNKNOWN	UNKNOWN	DOLOMITE											21	31.8		0.03									0.15	70
D173978		USGS		Geochemistry of rock samples from the National Geochemical Database: U.S. Geological Survey, Reston, VA.	U.S. Geological Survey	USGS		41.7417	-111.775	0.01	73	73	73	UNKNOWN	SEDIMENTARY	UNKNOWN	UNKNOWN	DOLOMITE		0.86									21.6	33.2		0.02									0.15	70
D173979		USGS		Geochemistry of rock samples from the National Geochemical Database: U.S. Geological Survey, Reston, VA.	U.S. Geological Survey	USGS		44.0917	-106.854	0.01	69	69	69	UNKNOWN	SEDIMENTARY	UNKNOWN	UNKNOWN	DOLOMITE		0.673									19.4	33.7		0.06									0.3	300			15
D173982		USGS		Geochemistry of rock samples from the National Geochemical Database: U.S. Geological Survey, Reston, VA.	U.S. Geological Survey	USGS		41.9042	-111.662	0.01	73	73	73	UNKNOWN	SEDIMENTARY	UNKNOWN	UNKNOWN	DOLOMITE											22	33		0.03									0.07	50			1.5
D173983		USGS		Geochemistry of rock samples from the National Geochemical Database: U.S. Geological Survey, Reston, VA.	U.S. Geological Survey	USGS		42.5764	-108.717	0.01	69	69	69	UNKNOWN	SEDIMENTARY	UNKNOWN	UNKNOWN	DOLOMITE											21.2	33.3		0.03									0.2	150			1.5
D173984		USGS		Geochemistry of rock samples from the National Geochemical Database: U.S. Geological Survey, Reston, VA.	U.S. Geological Survey	USGS		45.5722	-110.39	0.01	69	69	69	UNKNOWN	SEDIMENTARY	UNKNOWN	UNKNOWN	DOLOMITE											20.5	33.3		0.04									0.3	70
D173985		USGS		Geochemistry of rock samples from the National Geochemical Database: U.S. Geological Survey, Reston, VA.	U.S. Geological Survey	USGS		47.9833	-108.55	0.01	69	69	69	UNKNOWN	SEDIMENTARY	UNKNOWN	UNKNOWN	DOLOMITE											21	33.5		0.02									0.2	150
D173986		USGS		Geochemistry of rock samples from the National Geochemical Database: U.S. Geological Survey, Reston, VA.	U.S. Geological Survey	USGS		32.7139	-108.197	0.01	73	73	73	UNKNOWN	SEDIMENTARY	UNKNOWN	UNKNOWN	DOLOMITE											20.8	33.2		0.02									0.2	700			7
D173987		USGS		Geochemistry of rock samples from the National Geochemical Database: U.S. Geological Survey, Reston, VA.	U.S. Geological Survey	USGS		39.4194	-116.188	0.01	73	73	73	UNKNOWN	SEDIMENTARY	UNKNOWN	UNKNOWN	DOLOMITE											21.1	33.4		0.02									0.07	100
D173988		USGS		Geochemistry of rock samples from the National Geochemical Database: U.S. Geological Survey, Reston, VA.	U.S. Geological Survey	USGS		38.3056	-105.865	0.01	69	69	69	UNKNOWN	SEDIMENTARY	UNKNOWN	UNKNOWN	DOLOMITE											20.6	32.6		0.03	0.116								0.3	150			30
D173989		USGS		Geochemistry of rock samples from the National Geochemical Database: U.S. Geological Survey, Reston, VA.	U.S. Geological Survey	USGS		37.3556	-115.45	0.01	73	73	73	UNKNOWN	SEDIMENTARY	UNKNOWN	UNKNOWN	DOLOMITE											20.9	32.9		0.01									0.1	50
D173990		USGS		Geochemistry of rock samples from the National Geochemical Database: U.S. Geological Survey, Reston, VA.	U.S. Geological Survey	USGS		44.9222	-109.299	0.01	69	69	69	UNKNOWN	SEDIMENTARY	UNKNOWN	UNKNOWN	DOLOMITE											20.4	32.8		0.03									0.3	50			1.5
D173991		USGS		Geochemistry of rock samples from the National Geochemical Database: U.S. Geological Survey, Reston, VA.	U.S. Geological Survey	USGS		38.7569	-112.485	0.01	73	71	69	UNKNOWN	SEDIMENTARY	UNKNOWN	UNKNOWN	DOLOMITE											20.6	33.9		0.04									0.1	70			1.5
D173993		USGS		Geochemistry of rock samples from the National Geochemical Database: U.S. Geological Survey, Reston, VA.	U.S. Geological Survey	USGS		36.0583	-116.042	0.01	69	69	69	UNKNOWN	SEDIMENTARY	UNKNOWN	UNKNOWN	DOLOMITE											19.2	32.6											0.07	30			2
D173994		USGS		Geochemistry of rock samples from the National Geochemical Database: U.S. Geological Survey, Reston, VA.	U.S. Geological Survey	USGS		39.5833	-116.267	0.01	73	73	73	UNKNOWN	SEDIMENTARY	UNKNOWN	UNKNOWN	DOLOMITE		3.96									18.3	31.7			0.0568								0.15	70			3
D173995		USGS		Geochemistry of rock samples from the National Geochemical Database: U.S. Geological Survey, Reston, VA.	U.S. Geological Survey	USGS		42.7139	-108.853	0.01	69	69	69	UNKNOWN	SEDIMENTARY	UNKNOWN	UNKNOWN	DOLOMITE											18.3	33.8											0.3	150			2
D173996		USGS		Geochemistry of rock samples from the National Geochemical Database: U.S. Geological Survey, Reston, VA.	U.S. Geological Survey	USGS		36.5722	-117.107	0.01	69	69	69	UNKNOWN	SEDIMENTARY	UNKNOWN	UNKNOWN	DOLOMITE		2.26									18.3	31.2			0.0387								0.2	100
D173998		USGS		Geochemistry of rock samples from the National Geochemical Database: U.S. Geological Survey, Reston, VA.	U.S. Geological Survey	USGS		45.1861	-108.353	0.01	69	69	69	UNKNOWN	SEDIMENTARY	UNKNOWN	UNKNOWN	DOLOMITE											18.4	34											0.2	50
D173999		USGS		Geochemistry of rock samples from the National Geochemical Database: U.S. Geological Survey, Reston, VA.	U.S. Geological Survey	USGS		39.1722	-112.133	0.01	73	71	69	UNKNOWN	SEDIMENTARY	UNKNOWN	UNKNOWN	DOLOMITE											18.4	34.7											0.15	50
D174000		USGS		Geochemistry of rock samples from the National Geochemical Database: U.S. Geological Survey, Reston, VA.	U.S. Geological Survey	USGS		39.1569	-112.133	0.01	73	71	69	UNKNOWN	SEDIMENTARY	UNKNOWN	UNKNOWN	DOLOMITE											19	33.6											0.15	30			7
D174001		USGS		Geochemistry of rock samples from the National Geochemical Database: U.S. Geological Survey, Reston, VA.	U.S. Geological Survey	USGS		43.6736	-110.954	0.01	69	69	69	UNKNOWN	SEDIMENTARY	UNKNOWN	UNKNOWN	DOLOMITE											18.9	32.5											0.2	50
D174002		USGS		Geochemistry of rock samples from the National Geochemical Database: U.S. Geological Survey, Reston, VA.	U.S. Geological Survey	USGS		41.3292	-116.011	0.01	69	69	69	UNKNOWN	SEDIMENTARY	UNKNOWN	UNKNOWN	DOLOMITE		14.1	0.0609								16	27.9											0.15	70
D174003		USGS		Geochemistry of rock samples from the National Geochemical Database: U.S. Geological Survey, Reston, VA.	U.S. Geological Survey	USGS		42.5764	-108.717	0.01	69	69	69	UNKNOWN	SEDIMENTARY	UNKNOWN	UNKNOWN	DOLOMITE											18.9	33.1											0.15	100
D174004		USGS		Geochemistry of rock samples from the National Geochemical Database: U.S. Geological Survey, Reston, VA.	U.S. Geological Survey	USGS		36.7306	-114.872	0.01	73	73	73	UNKNOWN	SEDIMENTARY	UNKNOWN	UNKNOWN	DOLOMITE											19.3	33.1											0.07	50
D174005		USGS		Geochemistry of rock samples from the National Geochemical Database: U.S. Geological Survey, Reston, VA.	U.S. Geological Survey	USGS		32.7417	-105.904	0.01	69	69	69	UNKNOWN	SEDIMENTARY	UNKNOWN	UNKNOWN	DOLOMITE		9.17	0.0511								16.3	30.3			0.151								1	500			3
D174006		USGS		Geochemistry of rock samples from the National Geochemical Database: U.S. Geological Survey, Reston, VA.	U.S. Geological Survey	USGS		38.7361	-105.854	0.01	69	69	69	UNKNOWN	SEDIMENTARY	UNKNOWN	UNKNOWN	DOLOMITE		9.63									14	32.1			0.0356								0.5	150			2
D174007		USGS		Geochemistry of rock samples from the National Geochemical Database: U.S. Geological Survey, Reston, VA.	U.S. Geological Survey	USGS		44.1083	-113.122	0.01	69	69	69	UNKNOWN	SEDIMENTARY	UNKNOWN	UNKNOWN	DOLOMITE		1.52									18.2	31.6											1	500
D174008		USGS		Geochemistry of rock samples from the National Geochemical Database: U.S. Geological Survey, Reston, VA.	U.S. Geological Survey	USGS		43.525	-110.975	0.01	69	69	69	UNKNOWN	SEDIMENTARY	UNKNOWN	UNKNOWN	DOLOMITE											19.3	32.5											0.07	20
D174009		USGS		Geochemistry of rock samples from the National Geochemical Database: U.S. Geological Survey, Reston, VA.	U.S. Geological Survey	USGS		36.9625	-118.094	0.01	69	69	69	UNKNOWN	SEDIMENTARY	UNKNOWN	UNKNOWN	DOLOMITE		1.53									18.4	32.7											0.15	150
D174010		USGS		Geochemistry of rock samples from the National Geochemical Database: U.S. Geological Survey, Reston, VA.	U.S. Geological Survey	USGS		32.9292	-107.229	0.01	69	69	69	UNKNOWN	SEDIMENTARY	UNKNOWN	UNKNOWN	DOLOMITE		4.93	0.0578								16.7	32.6			0.125	1.1							0.3	300			7
D174011		USGS		Geochemistry of rock samples from the National Geochemical Database: U.S. Geological Survey, Reston, VA.	U.S. Geological Survey	USGS		41.3292	-116.011	0.01	73	73	73	UNKNOWN	SEDIMENTARY	UNKNOWN	UNKNOWN	DOLOMITE		12.5									16.5	29.6											0.15	70
D174012		USGS		Geochemistry of rock samples from the National Geochemical Database: U.S. Geological Survey, Reston, VA.	U.S. Geological Survey	USGS		36.8278	-118.104	0.01	69	69	69	UNKNOWN	SEDIMENTARY	UNKNOWN	UNKNOWN	DOLOMITE		0.602									18.9	33.8											0.5	300			50				7
D174013		USGS		Geochemistry of rock samples from the National Geochemical Database: U.S. Geological Survey, Reston, VA.	U.S. Geological Survey	USGS		38.4694	-114.967	0.01	73	73	73	UNKNOWN	SEDIMENTARY	UNKNOWN	UNKNOWN	DOLOMITE											18.6	34.1											0.15	50
D174014		USGS		Geochemistry of rock samples from the National Geochemical Database: U.S. Geological Survey, Reston, VA.	U.S. Geological Survey	USGS		45.5958	-110.411	0.01	69	69	69	UNKNOWN	SEDIMENTARY	UNKNOWN	UNKNOWN	DOLOMITE											19	34.6			0.0595								0.2	70
D174015		USGS		Geochemistry of rock samples from the National Geochemical Database: U.S. Geological Survey, Reston, VA.	U.S. Geological Survey	USGS		38.2153	-106.036	0.01	69	69	69	UNKNOWN	SEDIMENTARY	UNKNOWN	UNKNOWN	DOLOMITE		1.15									18.8	33.4			0.188								0.3	150			7
D174016		USGS		Geochemistry of rock samples from the National Geochemical Database: U.S. Geological Survey, Reston, VA.	U.S. Geological Survey	USGS		37.3556	-115.45	0.01	73	73	73	UNKNOWN	SEDIMENTARY	UNKNOWN	UNKNOWN	DOLOMITE											19.4	33											0.05	50
D174017		USGS		Geochemistry of rock samples from the National Geochemical Database: U.S. Geological Survey, Reston, VA.	U.S. Geological Survey	USGS		45.5958	-110.578	0.01	69	69	69	UNKNOWN	SEDIMENTARY	UNKNOWN	UNKNOWN	DOLOMITE											18.4	35.1			0.0423								0.3	70			2
D174018		USGS		Geochemistry of rock samples from the National Geochemical Database: U.S. Geological Survey, Reston, VA.	U.S. Geological Survey	USGS		44.6875	-107.196	0.01	69	69	69	UNKNOWN	SEDIMENTARY	UNKNOWN	UNKNOWN	DOLOMITE		1.45									18.6	33			0.0645								0.2	70			3
D174019		USGS		Geochemistry of rock samples from the National Geochemical Database: U.S. Geological Survey, Reston, VA.	U.S. Geological Survey	USGS		39.1722	-112.133	0.01	73	71	69	UNKNOWN	SEDIMENTARY	UNKNOWN	UNKNOWN	DOLOMITE											19.1	34											0.15	30
D174022		USGS		Geochemistry of rock samples from the National Geochemical Database: U.S. Geological Survey, Reston, VA.	U.S. Geological Survey	USGS		37.3556	-115.392	0.01	73	73	73	UNKNOWN	SEDIMENTARY	UNKNOWN	UNKNOWN	DOLOMITE											19.2	33.8			0.0422								0.07	100
D174024		USGS		Geochemistry of rock samples from the National Geochemical Database: U.S. Geological Survey, Reston, VA.	U.S. Geological Survey	USGS		41.0278	-113.358	0.01	73	73	73	UNKNOWN	SEDIMENTARY	UNKNOWN	UNKNOWN	DOLOMITE											19.2	33.5			0.0324								0.07	100
D174025		USGS		Geochemistry of rock samples from the National Geochemical Database: U.S. Geological Survey, Reston, VA.	U.S. Geological Survey	USGS		38.7361	-105.854	0.01	69	69	69	UNKNOWN	SEDIMENTARY	UNKNOWN	UNKNOWN	DOLOMITE		11									14.3	34.8			0.125								0.5	150			3
D174027		USGS		Geochemistry of rock samples from the National Geochemical Database: U.S. Geological Survey, Reston, VA.	U.S. Geological Survey	USGS		39.6139	-114.946	0.01	73	71	69	UNKNOWN	SEDIMENTARY	UNKNOWN	UNKNOWN	DOLOMITE		4.33									18.6	32.5			0.0779								0.3	70			2
D174029		USGS		Geochemistry of rock samples from the National Geochemical Database: U.S. Geological Survey, Reston, VA.	U.S. Geological Survey	USGS		42.6014	-111.921	0.01	73	73	73	UNKNOWN	SEDIMENTARY	UNKNOWN	UNKNOWN	DOLOMITE		1.22									18.7	34			0.166								0.2	150
D174030		USGS		Geochemistry of rock samples from the National Geochemical Database: U.S. Geological Survey, Reston, VA.	U.S. Geological Survey	USGS		38.7569	-112.465	0.01	73	71	69	UNKNOWN	SEDIMENTARY	UNKNOWN	UNKNOWN	DOLOMITE		0.781									19	33.4											0.3	30
D174031		USGS		Geochemistry of rock samples from the National Geochemical Database: U.S. Geological Survey, Reston, VA.	U.S. Geological Survey	USGS		36.6306	-114.867	0.01	73	73	73	UNKNOWN	SEDIMENTARY	UNKNOWN	UNKNOWN	DOLOMITE											19	35											0.07	30
D174032		USGS		Geochemistry of rock samples from the National Geochemical Database: U.S. Geological Survey, Reston, VA.	U.S. Geological Survey	USGS		42.6792	-111.696	0.01	69	69	69	UNKNOWN	SEDIMENTARY	UNKNOWN	UNKNOWN	DOLOMITE		0.503									20.5	31.8			0.104								0.15	30			2
D174033		USGS		Geochemistry of rock samples from the National Geochemical Database: U.S. Geological Survey, Reston, VA.	U.S. Geological Survey	USGS		41.1528	-113.375	0.01	73	73	73	UNKNOWN	SEDIMENTARY	UNKNOWN	UNKNOWN	DOLOMITE											20.6	32.6			0.126								0.15	150
D174034		USGS		Geochemistry of rock samples from the National Geochemical Database: U.S. Geological Survey, Reston, VA.	U.S. Geological Survey	USGS		38.8569	-105.987	0.01	69	69	69	UNKNOWN	SEDIMENTARY	UNKNOWN	UNKNOWN	DOLOMITE											20.8	32.3			0.0721								0.07	200
D174035		USGS		Geochemistry of rock samples from the National Geochemical Database: U.S. Geological Survey, Reston, VA.	U.S. Geological Survey	USGS		32.85	-105.912	0.01	69	69	69	UNKNOWN	SEDIMENTARY	UNKNOWN	UNKNOWN	DOLOMITE		0.513									20.1	32.2			0.1								0.15	150
D174037		USGS		Geochemistry of rock samples from the National Geochemical Database: U.S. Geological Survey, Reston, VA.	U.S. Geological Survey	USGS		32.75	-107.208	0.01	69	69	69	UNKNOWN	SEDIMENTARY	UNKNOWN	UNKNOWN	DOLOMITE		2.83									19.8	31.1			0.133								0.3	300
D174038		USGS		Geochemistry of rock samples from the National Geochemical Database: U.S. Geological Survey, Reston, VA.	U.S. Geological Survey	USGS		43.525	-110.975	0.01	69	69	69	UNKNOWN	SEDIMENTARY	UNKNOWN	UNKNOWN	DOLOMITE											20.7	31.8			0.076								0.15	30
D174039		USGS		Geochemistry of rock samples from the National Geochemical Database: U.S. Geological Survey, Reston, VA.	U.S. Geological Survey	USGS		44.3528	-103.938	0.01	69	69	69	UNKNOWN	SEDIMENTARY	UNKNOWN	UNKNOWN	DOLOMITE		14.2	0.0635	0.697							14.5	26.7			0.834								3	700
D174040		USGS		Geochemistry of rock samples from the National Geochemical Database: U.S. Geological Survey, Reston, VA.	U.S. Geological Survey	USGS		36.1111	-116.167	0.01	73	73	73	UNKNOWN	SEDIMENTARY	UNKNOWN	UNKNOWN	DOLOMITE											21.3	32.4			0.039								0.15	70
D174041		USGS		Geochemistry of rock samples from the National Geochemical Database: U.S. Geological Survey, Reston, VA.	U.S. Geological Survey	USGS		36.9431	-118.079	0.01	69	69	69	UNKNOWN	SEDIMENTARY	UNKNOWN	UNKNOWN	DOLOMITE		3.95									19.9	30.7			0.0769								0.15	100
D174042		USGS		Geochemistry of rock samples from the National Geochemical Database: U.S. Geological Survey, Reston, VA.	U.S. Geological Survey	USGS		36.7458	-117.081	0.01	73	73	73	UNKNOWN	SEDIMENTARY	UNKNOWN	UNKNOWN	DOLOMITE		18		0.581							16.3	25.2			1.15								0.7	200			15
D174043		USGS		Geochemistry of rock samples from the National Geochemical Database: U.S. Geological Survey, Reston, VA.	U.S. Geological Survey	USGS		36.825	-118.075	0.01	73	73	73	UNKNOWN	SEDIMENTARY	UNKNOWN	UNKNOWN	DOLOMITE		7.81									3.47	48.7			0.413								0.3	300			3
D174044		USGS		Geochemistry of rock samples from the National Geochemical Database: U.S. Geological Survey, Reston, VA.	U.S. Geological Survey	USGS		38.8014	-106.683	0.01	69	69	69	UNKNOWN	SEDIMENTARY	UNKNOWN	UNKNOWN	DOLOMITE											20.8	31.2			0.0724								0.5	300			5
D174045		USGS		Geochemistry of rock samples from the National Geochemical Database: U.S. Geological Survey, Reston, VA.	U.S. Geological Survey	USGS		32.85	-105.912	0.01	69	69	69	UNKNOWN	SEDIMENTARY	UNKNOWN	UNKNOWN	DOLOMITE		1.23									21	31.1			0.0557								0.3	150
D174046		USGS		Geochemistry of rock samples from the National Geochemical Database: U.S. Geological Survey, Reston, VA.	U.S. Geological Survey	USGS		38.8014	-106.683	0.01	69	69	69	UNKNOWN	SEDIMENTARY	UNKNOWN	UNKNOWN	DOLOMITE											20.7	30.2			0.0904								0.3	200			5
D174047		USGS		Geochemistry of rock samples from the National Geochemical Database: U.S. Geological Survey, Reston, VA.	U.S. Geological Survey	USGS		43.4083	-108.179	0.01	69	69	69	UNKNOWN	SEDIMENTARY	UNKNOWN	UNKNOWN	DOLOMITE											21	31.1			0.0548								0.3	100
D174048		USGS		Geochemistry of rock samples from the National Geochemical Database: U.S. Geological Survey, Reston, VA.	U.S. Geological Survey	USGS		36.6958	-114.886	0.01	69	69	69	UNKNOWN	SEDIMENTARY	UNKNOWN	UNKNOWN	DOLOMITE		2.64									20.7	30.7			0.0464								0.03	50
D174049		USGS		Geochemistry of rock samples from the National Geochemical Database: U.S. Geological Survey, Reston, VA.	U.S. Geological Survey	USGS		38.5972	-105.261	0.01	69	69	69	UNKNOWN	SEDIMENTARY	UNKNOWN	UNKNOWN	DOLOMITE											20.7	31.9			0.095								0.5	300	7		3
D174050		USGS		Geochemistry of rock samples from the National Geochemical Database: U.S. Geological Survey, Reston, VA.	U.S. Geological Survey	USGS		43.5208	-107.9	0.01	69	69	69	UNKNOWN	SEDIMENTARY	UNKNOWN	UNKNOWN	DOLOMITE		2.29									17.9	32.9			0.152								0.5	300			7
D174051		USGS		Geochemistry of rock samples from the National Geochemical Database: U.S. Geological Survey, Reston, VA.	U.S. Geological Survey	USGS		43.5347	-109.29	0.01	69	69	69	UNKNOWN	SEDIMENTARY	UNKNOWN	UNKNOWN	DOLOMITE											20.7	31.5			0.0497								0.2	70			3
D174052		USGS		Geochemistry of rock samples from the National Geochemical Database: U.S. Geological Survey, Reston, VA.	U.S. Geological Survey	USGS		44.6625	-107.171	0.01	69	69	69	UNKNOWN	SEDIMENTARY	UNKNOWN	UNKNOWN	DOLOMITE		0.552									20.6	33			0.0413								0.3	100
D174053		USGS		Geochemistry of rock samples from the National Geochemical Database: U.S. Geological Survey, Reston, VA.	U.S. Geological Survey	USGS		42.5764	-108.717	0.01	69	69	69	UNKNOWN	SEDIMENTARY	UNKNOWN	UNKNOWN	DOLOMITE											21.1	32.6											0.2	100			3
D174054		USGS		Geochemistry of rock samples from the National Geochemical Database: U.S. Geological Survey, Reston, VA.	U.S. Geological Survey	USGS		36.6083	-114.907	0.01	69	69	69	UNKNOWN	SEDIMENTARY	UNKNOWN	UNKNOWN	DOLOMITE											20.7	32.7											0.02	50
D174055		USGS		Geochemistry of rock samples from the National Geochemical Database: U.S. Geological Survey, Reston, VA.	U.S. Geological Survey	USGS		37.3806	-115.392	0.01	69	69	69	UNKNOWN	SEDIMENTARY	UNKNOWN	UNKNOWN	DOLOMITE		0.626									20.6	32.5			0.103								0.2	100			3
D174056		USGS		Geochemistry of rock samples from the National Geochemical Database: U.S. Geological Survey, Reston, VA.	U.S. Geological Survey	USGS		36.7306	-114.889	0.01	69	69	69	UNKNOWN	SEDIMENTARY	UNKNOWN	UNKNOWN	DOLOMITE											21.3	32.2											0.07	50
D174057		USGS		Geochemistry of rock samples from the National Geochemical Database: U.S. Geological Survey, Reston, VA.	U.S. Geological Survey	USGS		41.8917	-111.747	0.01	73	73	73	UNKNOWN	SEDIMENTARY	UNKNOWN	UNKNOWN	DOLOMITE											21.2	32.2			0.0301								0.05	70
D174058		USGS		Geochemistry of rock samples from the National Geochemical Database: U.S. Geological Survey, Reston, VA.	U.S. Geological Survey	USGS		42.6986	-111.733	0.01	69	69	69	UNKNOWN	SEDIMENTARY	UNKNOWN	UNKNOWN	DOLOMITE		5.59									19.8	29.9			0.0724								0.1	70
D174060		USGS		Geochemistry of rock samples from the National Geochemical Database: U.S. Geological Survey, Reston, VA.	U.S. Geological Survey	USGS		43.2875	-109.425	0.01	69	69	69	UNKNOWN	SEDIMENTARY	UNKNOWN	UNKNOWN	DOLOMITE											20.9	32.1			0.0426								0.1	300			5
D174061		USGS		Geochemistry of rock samples from the National Geochemical Database: U.S. Geological Survey, Reston, VA.	U.S. Geological Survey	USGS		44.1667	-106.871	0.01	69	69	69	UNKNOWN	SEDIMENTARY	UNKNOWN	UNKNOWN	DOLOMITE		1.61									20.5	31.2			0.158								0.3	200			5
D174062		USGS		Geochemistry of rock samples from the National Geochemical Database: U.S. Geological Survey, Reston, VA.	U.S. Geological Survey	USGS		32.75	-107.208	0.01	69	69	69	UNKNOWN	SEDIMENTARY	UNKNOWN	UNKNOWN	DOLOMITE		2.82									19.7	32.1			0.118								0.3	300			2
D174063		USGS		Geochemistry of rock samples from the National Geochemical Database: U.S. Geological Survey, Reston, VA.	U.S. Geological Survey	USGS		44.8486	-107.35	0.01	69	69	69	UNKNOWN	SEDIMENTARY	UNKNOWN	UNKNOWN	DOLOMITE		0.857									20.7	32			0.0606								0.2	70
D174064		USGS		Geochemistry of rock samples from the National Geochemical Database: U.S. Geological Survey, Reston, VA.	U.S. Geological Survey	USGS		38.8042	-113.594	0.01	73	73	73	UNKNOWN	SEDIMENTARY	UNKNOWN	UNKNOWN	DOLOMITE											21.2	32			0.0494								0.07	50
D174066		USGS		Geochemistry of rock samples from the National Geochemical Database: U.S. Geological Survey, Reston, VA.	U.S. Geological Survey	USGS		37.3806	-115.392	0.01	73	73	73	UNKNOWN	SEDIMENTARY	UNKNOWN	UNKNOWN	DOLOMITE											21.4	32											0.03	30
D174067		USGS		Geochemistry of rock samples from the National Geochemical Database: U.S. Geological Survey, Reston, VA.	U.S. Geological Survey	USGS		39.7556	-113.199	0.01	73	73	73	UNKNOWN	SEDIMENTARY	UNKNOWN	UNKNOWN	DOLOMITE											19.2	34.4											0.07	70
D174068		USGS		Geochemistry of rock samples from the National Geochemical Database: U.S. Geological Survey, Reston, VA.	U.S. Geological Survey	USGS		38.2819	-105.858	0.01	69	69	69	UNKNOWN	SEDIMENTARY	UNKNOWN	UNKNOWN	DOLOMITE											20.7	32.7			0.0758								0.3	200			2
D174069		USGS		Geochemistry of rock samples from the National Geochemical Database: U.S. Geological Survey, Reston, VA.	U.S. Geological Survey	USGS		36.3069	-116.967	0.01	69	69	69	UNKNOWN	SEDIMENTARY	UNKNOWN	UNKNOWN	DOLOMITE											21.2	32.8											0.03	70
D174070		USGS		Geochemistry of rock samples from the National Geochemical Database: U.S. Geological Survey, Reston, VA.	U.S. Geological Survey	USGS		41.1528	-113.375	0.01	73	73	73	UNKNOWN	SEDIMENTARY	UNKNOWN	UNKNOWN	DOLOMITE											19.9	32.6			0.11								0.2	150
D174071		USGS		Geochemistry of rock samples from the National Geochemical Database: U.S. Geological Survey, Reston, VA.	U.S. Geological Survey	USGS		44.3889	-103.703	0.01	69	69	69	UNKNOWN	SEDIMENTARY	UNKNOWN	UNKNOWN	DOLOMITE		3.83									18.5	31.6			0.134								1.5	700
D174072		USGS		Geochemistry of rock samples from the National Geochemical Database: U.S. Geological Survey, Reston, VA.	U.S. Geological Survey	USGS		31.9639	-106.501	0.01	73	73	73	UNKNOWN	SEDIMENTARY	UNKNOWN	UNKNOWN	DOLOMITE		0.548									21.9	33.6			0.0993								0.15	70			2
D174073		USGS		Geochemistry of rock samples from the National Geochemical Database: U.S. Geological Survey, Reston, VA.	U.S. Geological Survey	USGS		43.5403	-109.218	0.01	69	69	69	UNKNOWN	SEDIMENTARY	UNKNOWN	UNKNOWN	DOLOMITE											21.5	33.8			0.035								0.15	70			2
D174074		USGS		Geochemistry of rock samples from the National Geochemical Database: U.S. Geological Survey, Reston, VA.	U.S. Geological Survey	USGS		41.3139	-116.046	0.01	69	69	69	UNKNOWN	SEDIMENTARY	UNKNOWN	UNKNOWN	DOLOMITE		21.7									16.7	26.8			0.108								0.15	50
D174075		USGS		Geochemistry of rock samples from the National Geochemical Database: U.S. Geological Survey, Reston, VA.	U.S. Geological Survey	USGS		37.3556	-115.392	0.01	69	69	69	UNKNOWN	SEDIMENTARY	UNKNOWN	UNKNOWN	DOLOMITE		1.71	0.0509								20.5	32.6			0.192								0.3	100			1.5
D174076		USGS		Geochemistry of rock samples from the National Geochemical Database: U.S. Geological Survey, Reston, VA.	U.S. Geological Survey	USGS		33.05	-107.229	0.01	69	69	69	UNKNOWN	SEDIMENTARY	UNKNOWN	UNKNOWN	DOLOMITE		1.72									19.5	33.3			0.126								0.5	300
D174077		USGS		Geochemistry of rock samples from the National Geochemical Database: U.S. Geological Survey, Reston, VA.	U.S. Geological Survey	USGS		43.5403	-109.218	0.01	69	69	69	UNKNOWN	SEDIMENTARY	UNKNOWN	UNKNOWN	DOLOMITE											20.9	34.2			0.0661								0.3	100			1.5
D174079		USGS		Geochemistry of rock samples from the National Geochemical Database: U.S. Geological Survey, Reston, VA.	U.S. Geological Survey	USGS		47.8583	-108.667	0.01	69	69	69	UNKNOWN	SEDIMENTARY	UNKNOWN	UNKNOWN	DOLOMITE											21.1	33.8			0.0452								0.3	150			1.5
D174080		USGS		Geochemistry of rock samples from the National Geochemical Database: U.S. Geological Survey, Reston, VA.	U.S. Geological Survey	USGS		32.8292	-108.361	0.01	69	69	69	UNKNOWN	SEDIMENTARY	UNKNOWN	UNKNOWN	DOLOMITE		0.526									20	33.5			0.0393								0.3	200			2
D174081		USGS		Geochemistry of rock samples from the National Geochemical Database: U.S. Geological Survey, Reston, VA.	U.S. Geological Survey	USGS		38.6625	-112.653	0.01	73	71	69	UNKNOWN	SEDIMENTARY	UNKNOWN	UNKNOWN	DOLOMITE		10.8									18.8	30.5											0.05	30			2
D174082		USGS		Geochemistry of rock samples from the National Geochemical Database: U.S. Geological Survey, Reston, VA.	U.S. Geological Survey	USGS		44.1083	-113.122	0.01	69	69	69	UNKNOWN	SEDIMENTARY	UNKNOWN	UNKNOWN	DOLOMITE											21.1	33.3			0.0793								0.2	70
D174083		USGS		Geochemistry of rock samples from the National Geochemical Database: U.S. Geological Survey, Reston, VA.	U.S. Geological Survey	USGS		38.9	-113.45	0.01	73	73	73	UNKNOWN	SEDIMENTARY	UNKNOWN	UNKNOWN	DOLOMITE											21.1	34.3											0.015	15
D174084		USGS		Geochemistry of rock samples from the National Geochemical Database: U.S. Geological Survey, Reston, VA.	U.S. Geological Survey	USGS		42.6014	-111.921	0.01	73	73	73	UNKNOWN	SEDIMENTARY	UNKNOWN	UNKNOWN	DOLOMITE		0.813									20.4	32.9			0.0963								0.15	100			1.5
D174085		USGS		Geochemistry of rock samples from the National Geochemical Database: U.S. Geological Survey, Reston, VA.	U.S. Geological Survey	USGS		44.3528	-103.938	0.01	69	69	69	UNKNOWN	SEDIMENTARY	UNKNOWN	UNKNOWN	DOLOMITE		28.7	0.107	1.19							10.4	23.3			1.1								5	700	7		2
D174086		USGS		Geochemistry of rock samples from the National Geochemical Database: U.S. Geological Survey, Reston, VA.	U.S. Geological Survey	USGS		38.4792	-105.278	0.01	69	69	69	UNKNOWN	SEDIMENTARY	UNKNOWN	UNKNOWN	DOLOMITE											20.5	33.3			0.052								0.1	300			5
D174087		USGS		Geochemistry of rock samples from the National Geochemical Database: U.S. Geological Survey, Reston, VA.	U.S. Geological Survey	USGS		39.6139	-114.946	0.01	73	71	69	UNKNOWN	SEDIMENTARY	UNKNOWN	UNKNOWN	DOLOMITE											20.6	34.7											0.07	50
D174088		USGS		Geochemistry of rock samples from the National Geochemical Database: U.S. Geological Survey, Reston, VA.	U.S. Geological Survey	USGS		31.8292	-106.467	0.01	69	69	69	UNKNOWN	SEDIMENTARY	UNKNOWN	UNKNOWN	DOLOMITE											20.4	33.9			0.0313								0.2	150			1.5
D174089		USGS		Geochemistry of rock samples from the National Geochemical Database: U.S. Geological Survey, Reston, VA.	U.S. Geological Survey	USGS		38.7569	-112.485	0.01	73	71	69	UNKNOWN	SEDIMENTARY	UNKNOWN	UNKNOWN	DOLOMITE		0.766									20.9	33.2											0.1	50			2
D174090		USGS		Geochemistry of rock samples from the National Geochemical Database: U.S. Geological Survey, Reston, VA.	U.S. Geological Survey	USGS		42.575	-111.892	0.01	73	73	73	UNKNOWN	SEDIMENTARY	UNKNOWN	UNKNOWN	DOLOMITE											21.1	33.7			0.072								0.2	150			2
D174092		USGS		Geochemistry of rock samples from the National Geochemical Database: U.S. Geological Survey, Reston, VA.	U.S. Geological Survey	USGS		44.3958	-114.219	0.01	69	69	69	UNKNOWN	SEDIMENTARY	UNKNOWN	UNKNOWN	DOLOMITE		52.3	0.257	2.34							6	15			1.42								1	200	15		7
D174093		USGS		Geochemistry of rock samples from the National Geochemical Database: U.S. Geological Survey, Reston, VA.	U.S. Geological Survey	USGS		31.8292	-106.467	0.01	73	73	73	UNKNOWN	SEDIMENTARY	UNKNOWN	UNKNOWN	DOLOMITE											21	33.5			0.0305								0.07	50			1.5
D174094		USGS		Geochemistry of rock samples from the National Geochemical Database: U.S. Geological Survey, Reston, VA.	U.S. Geological Survey	USGS		42.575	-111.892	0.01	73	73	73	UNKNOWN	SEDIMENTARY	UNKNOWN	UNKNOWN	DOLOMITE											21.6	33.4			0.062								0.07	100
D174095		USGS		Geochemistry of rock samples from the National Geochemical Database: U.S. Geological Survey, Reston, VA.	U.S. Geological Survey	USGS		38.9	-113.45	0.01	73	73	73	UNKNOWN	SEDIMENTARY	UNKNOWN	UNKNOWN	DOLOMITE											21.7	33.8			0.0312								0.03	20
D174096		USGS		Geochemistry of rock samples from the National Geochemical Database: U.S. Geological Survey, Reston, VA.	U.S. Geological Survey	USGS		36.6958	-114.886	0.01	69	69	69	UNKNOWN	SEDIMENTARY	UNKNOWN	UNKNOWN	DOLOMITE		2.75									20.8	31.5											0.03	20
D174097		USGS		Geochemistry of rock samples from the National Geochemical Database: U.S. Geological Survey, Reston, VA.	U.S. Geological Survey	USGS		32.8292	-108.361	0.01	69	69	69	UNKNOWN	SEDIMENTARY	UNKNOWN	UNKNOWN	DOLOMITE		1.2									20.5	33.3			0.078								0.3	300			1.5
D174098		USGS		Geochemistry of rock samples from the National Geochemical Database: U.S. Geological Survey, Reston, VA.	U.S. Geological Survey	USGS		32.7417	-105.904	0.01	69	69	69	UNKNOWN	SEDIMENTARY	UNKNOWN	UNKNOWN	DOLOMITE		0.96									20.8	33			0.0856								0.15	200
D174099		USGS		Geochemistry of rock samples from the National Geochemical Database: U.S. Geological Survey, Reston, VA.	U.S. Geological Survey	USGS		43.6736	-110.954	0.01	69	69	69	UNKNOWN	SEDIMENTARY	UNKNOWN	UNKNOWN	DOLOMITE											20.5	33.2			0.0607								0.15	50
D174100		USGS		Geochemistry of rock samples from the National Geochemical Database: U.S. Geological Survey, Reston, VA.	U.S. Geological Survey	USGS		36.6306	-114.867	0.01	69	69	69	UNKNOWN	SEDIMENTARY	UNKNOWN	UNKNOWN	DOLOMITE		0.998									21	33			0.0388								0.1	30
D174101		USGS		Geochemistry of rock samples from the National Geochemical Database: U.S. Geological Survey, Reston, VA.	U.S. Geological Survey	USGS		32.8194	-108.336	0.01	69	69	69	UNKNOWN	SEDIMENTARY	UNKNOWN	UNKNOWN	DOLOMITE											20.5	33.9			0.0416								0.2	200			2
D174102		USGS		Geochemistry of rock samples from the National Geochemical Database: U.S. Geological Survey, Reston, VA.	U.S. Geological Survey	USGS		31.9639	-106.501	0.01	69	69	69	UNKNOWN	SEDIMENTARY	UNKNOWN	UNKNOWN	DOLOMITE		2.2									17.9	35.1			0.0976								0.2	70
D174103		USGS		Geochemistry of rock samples from the National Geochemical Database: U.S. Geological Survey, Reston, VA.	U.S. Geological Survey	USGS		45.5722	-110.39	0.01	69	69	69	UNKNOWN	SEDIMENTARY	UNKNOWN	UNKNOWN	DOLOMITE		1.27									19.9	32.9			0.309								0.3	50	5		2
D174104		USGS		Geochemistry of rock samples from the National Geochemical Database: U.S. Geological Survey, Reston, VA.	U.S. Geological Survey	USGS		44.3736	-103.917	0.01	69	69	69	UNKNOWN	SEDIMENTARY	UNKNOWN	UNKNOWN	DOLOMITE		11									18.4	29.3			0.0527								0.2	150			2
D174105		USGS		Geochemistry of rock samples from the National Geochemical Database: U.S. Geological Survey, Reston, VA.	U.S. Geological Survey	USGS		42.7375	-108.825	0.01	69	69	69	UNKNOWN	SEDIMENTARY	UNKNOWN	UNKNOWN	DOLOMITE		3.54									20.1	31.7			0.21								0.3	100
D174106		USGS		Geochemistry of rock samples from the National Geochemical Database: U.S. Geological Survey, Reston, VA.	U.S. Geological Survey	USGS		39.2431	-112.19	0.01	73	71	69	UNKNOWN	SEDIMENTARY	UNKNOWN	UNKNOWN	DOLOMITE											20.6	33.9											0.07	70
D174107		USGS		Geochemistry of rock samples from the National Geochemical Database: U.S. Geological Survey, Reston, VA.	U.S. Geological Survey	USGS		48.0167	-108.594	0.01	69	69	69	UNKNOWN	SEDIMENTARY	UNKNOWN	UNKNOWN	DOLOMITE											20.6	33.1			0.0832								0.2	70
D174108		USGS		Geochemistry of rock samples from the National Geochemical Database: U.S. Geological Survey, Reston, VA.	U.S. Geological Survey	USGS		32.8194	-108.336	0.01	73	73	73	UNKNOWN	SEDIMENTARY	UNKNOWN	UNKNOWN	DOLOMITE											20.9	32.5											0.3	200
D174109		USGS		Geochemistry of rock samples from the National Geochemical Database: U.S. Geological Survey, Reston, VA.	U.S. Geological Survey	USGS		45.575	-110.558	0.01	69	69	69	UNKNOWN	SEDIMENTARY	UNKNOWN	UNKNOWN	DOLOMITE		0.687									20.7	33.6			0.0923								0.2	50
D174110		USGS		Geochemistry of rock samples from the National Geochemical Database: U.S. Geological Survey, Reston, VA.	U.S. Geological Survey	USGS		33.05	-107.229	0.01	69	69	69	UNKNOWN	SEDIMENTARY	UNKNOWN	UNKNOWN	DOLOMITE		13.4									17.3	29.6			0.142								0.5	500			2
D174111		USGS		Geochemistry of rock samples from the National Geochemical Database: U.S. Geological Survey, Reston, VA.	U.S. Geological Survey	USGS		43.2875	-109.425	0.01	69	69	69	UNKNOWN	SEDIMENTARY	UNKNOWN	UNKNOWN	DOLOMITE		0.542									20.3	33.5			0.0482								0.15	70
D174112		USGS		Geochemistry of rock samples from the National Geochemical Database: U.S. Geological Survey, Reston, VA.	U.S. Geological Survey	USGS		44.1833	-106.85	0.01	69	69	69	UNKNOWN	SEDIMENTARY	UNKNOWN	UNKNOWN	DOLOMITE											20.9	33.7			0.0444								0.3	150			3
D174113		USGS		Geochemistry of rock samples from the National Geochemical Database: U.S. Geological Survey, Reston, VA.	U.S. Geological Survey	USGS		39.2431	-112.19	0.01	73	71	69	UNKNOWN	SEDIMENTARY	UNKNOWN	UNKNOWN	DOLOMITE		2.96									20.3	33.6			0.143								0.3	150			2
D174114		USGS		Geochemistry of rock samples from the National Geochemical Database: U.S. Geological Survey, Reston, VA.	U.S. Geological Survey	USGS		38.8569	-105.987	0.01	69	69	69	UNKNOWN	SEDIMENTARY	UNKNOWN	UNKNOWN	DOLOMITE											21	34.7			0.0442								0.15	200			2
D174115		USGS		Geochemistry of rock samples from the National Geochemical Database: U.S. Geological Survey, Reston, VA.	U.S. Geological Survey	USGS		44.7597	-109.394	0.01	69	69	69	UNKNOWN	SEDIMENTARY	UNKNOWN	UNKNOWN	DOLOMITE											20.9	34.2			0.0412								0.2	70			1.5
D178372		USGS		Geochemistry of rock samples from the National Geochemical Database: U.S. Geological Survey, Reston, VA.	U.S. Geological Survey	USGS		38.5	-118	0.01	59	59	59	UNKNOWN	SEDIMENTARY	UNKNOWN	UNKNOWN	DOLOMITE																							0.082	67
D182826		USGS		Geochemistry of rock samples from the National Geochemical Database: U.S. Geological Survey, Reston, VA.	U.S. Geological Survey	USGS		40.375	-117.5	0.01	43	43	43	UNKNOWN	SEDIMENTARY	UNKNOWN	UNKNOWN	DOLOMITE																							7	2000	30	15	30
D182907		USGS		Geochemistry of rock samples from the National Geochemical Database: U.S. Geological Survey, Reston, VA.	U.S. Geological Survey	USGS		43.4392	-111.454	0.01	71	71	71	UNKNOWN	SEDIMENTARY	UNKNOWN	UNKNOWN	DOLOMITE																						1	0.3	70			15
D188500		USGS		Geochemistry of rock samples from the National Geochemical Database: U.S. Geological Survey, Reston, VA.	U.S. Geological Survey	USGS		40.4458	-109.263	0.01	71	71	71	UNKNOWN	SEDIMENTARY	UNKNOWN	UNKNOWN	DOLOMITE																							0.5	150			5
D188501		USGS		Geochemistry of rock samples from the National Geochemical Database: U.S. Geological Survey, Reston, VA.	U.S. Geological Survey	USGS		40.4458	-109.263	0.01	71	71	71	UNKNOWN	SEDIMENTARY	UNKNOWN	UNKNOWN	DOLOMITE																							0.7	150	5		3
D192004		USGS		Geochemistry of rock samples from the National Geochemical Database: U.S. Geological Survey, Reston, VA.	U.S. Geological Survey	USGS		36.1333	-114.933	0.01	11	11	11	UNKNOWN	SEDIMENTARY	UNKNOWN	UNKNOWN	DOLOMITE																						5	0.3	150			5
D192012		USGS		Geochemistry of rock samples from the National Geochemical Database: U.S. Geological Survey, Reston, VA.	U.S. Geological Survey	USGS		36.1333	-114.933	0.01	11	11	11	UNKNOWN	SEDIMENTARY	UNKNOWN	UNKNOWN	DOLOMITE																						0.7	0.01	20			2
D192014		USGS		Geochemistry of rock samples from the National Geochemical Database: U.S. Geological Survey, Reston, VA.	U.S. Geological Survey	USGS		36.1333	-114.933	0.01	11	11	11	UNKNOWN	SEDIMENTARY	UNKNOWN	UNKNOWN	DOLOMITE																						7	0.5	100	5		3
D192019		USGS		Geochemistry of rock samples from the National Geochemical Database: U.S. Geological Survey, Reston, VA.	U.S. Geological Survey	USGS		36.1333	-114.933	0.01	11	11	11	UNKNOWN	SEDIMENTARY	UNKNOWN	UNKNOWN	DOLOMITE																						10	1.5	200	10	5	20
D192042		USGS		Geochemistry of rock samples from the National Geochemical Database: U.S. Geological Survey, Reston, VA.	U.S. Geological Survey	USGS		36.1333	-114.917	0.01	11	11	11	UNKNOWN	SEDIMENTARY	UNKNOWN	UNKNOWN	DOLOMITE																						1	0.05	20			1
D192037		USGS		Geochemistry of rock samples from the National Geochemical Database: U.S. Geological Survey, Reston, VA.	U.S. Geological Survey	USGS		36.1333	-114.917	0.01	11	11	11	UNKNOWN	SEDIMENTARY	UNKNOWN	UNKNOWN	DOLOMITE																						1.5	0.05	10			2
D192038		USGS		Geochemistry of rock samples from the National Geochemical Database: U.S. Geological Survey, Reston, VA.	U.S. Geological Survey	USGS		36.1333	-114.917	0.01	11	11	11	UNKNOWN	SEDIMENTARY	UNKNOWN	UNKNOWN	DOLOMITE																						3	0.2	20			5
D192039		USGS		Geochemistry of rock samples from the National Geochemical Database: U.S. Geological Survey, Reston, VA.	U.S. Geological Survey	USGS		36.1333	-114.917	0.01	11	11	11	UNKNOWN	SEDIMENTARY	UNKNOWN	UNKNOWN	DOLOMITE																						5	0.2	70			5
D192040		USGS		Geochemistry of rock samples from the National Geochemical Database: U.S. Geological Survey, Reston, VA.	U.S. Geological Survey	USGS		36.1333	-114.917	0.01	11	11	11	UNKNOWN	SEDIMENTARY	UNKNOWN	UNKNOWN	DOLOMITE																						5	0.2	50			7
D192041		USGS		Geochemistry of rock samples from the National Geochemical Database: U.S. Geological Survey, Reston, VA.	U.S. Geological Survey	USGS		36.1333	-114.917	0.01	11	11	11	UNKNOWN	SEDIMENTARY	UNKNOWN	UNKNOWN	DOLOMITE																						2	0.1	30			1
D192043		USGS		Geochemistry of rock samples from the National Geochemical Database: U.S. Geological Survey, Reston, VA.	U.S. Geological Survey	USGS		36.1333	-114.917	0.01	11	11	11	UNKNOWN	SEDIMENTARY	UNKNOWN	UNKNOWN	DOLOMITE																						1.5	0.1	50			1.5
D192044		USGS		Geochemistry of rock samples from the National Geochemical Database: U.S. Geological Survey, Reston, VA.	U.S. Geological Survey	USGS		36.1333	-114.917	0.01	11	11	11	UNKNOWN	SEDIMENTARY	UNKNOWN	UNKNOWN	DOLOMITE																							0.2	150			2
D192045		USGS		Geochemistry of rock samples from the National Geochemical Database: U.S. Geological Survey, Reston, VA.	U.S. Geological Survey	USGS		36.1333	-114.917	0.01	11	11	11	UNKNOWN	SEDIMENTARY	UNKNOWN	UNKNOWN	DOLOMITE																						3	0.05	50			1
D192046		USGS		Geochemistry of rock samples from the National Geochemical Database: U.S. Geological Survey, Reston, VA.	U.S. Geological Survey	USGS		36.1333	-114.917	0.01	11	11	11	UNKNOWN	SEDIMENTARY	UNKNOWN	UNKNOWN	DOLOMITE																						3	0.1	30			1
D192048		USGS		Geochemistry of rock samples from the National Geochemical Database: U.S. Geological Survey, Reston, VA.	U.S. Geological Survey	USGS		36.1333	-114.917	0.01	11	11	11	UNKNOWN	SEDIMENTARY	UNKNOWN	UNKNOWN	DOLOMITE																							2	50	5		2
D192050		USGS		Geochemistry of rock samples from the National Geochemical Database: U.S. Geological Survey, Reston, VA.	U.S. Geological Survey	USGS		36.1333	-114.917	0.01	11	11	11	UNKNOWN	SEDIMENTARY	UNKNOWN	UNKNOWN	DOLOMITE																						2	0.07	20			1
D192062		USGS		Geochemistry of rock samples from the National Geochemical Database: U.S. Geological Survey, Reston, VA.	U.S. Geological Survey	USGS		36.1333	-114.917	0.01	11	11	11	UNKNOWN	SEDIMENTARY	UNKNOWN	UNKNOWN	DOLOMITE																						2	0.15	70			3
D192063		USGS		Geochemistry of rock samples from the National Geochemical Database: U.S. Geological Survey, Reston, VA.	U.S. Geological Survey	USGS		36.1333	-114.917	0.01	11	11	11	UNKNOWN	SEDIMENTARY	UNKNOWN	UNKNOWN	DOLOMITE																						3	0.3	70			5
D192064		USGS		Geochemistry of rock samples from the National Geochemical Database: U.S. Geological Survey, Reston, VA.	U.S. Geological Survey	USGS		36.1333	-114.917	0.01	11	11	11	UNKNOWN	SEDIMENTARY	UNKNOWN	UNKNOWN	DOLOMITE																						3	0.3	100			3
D192065		USGS		Geochemistry of rock samples from the National Geochemical Database: U.S. Geological Survey, Reston, VA.	U.S. Geological Survey	USGS		36.1333	-114.917	0.01	11	11	11	UNKNOWN	SEDIMENTARY	UNKNOWN	UNKNOWN	DOLOMITE																						5	0.3	30			5
D192066		USGS		Geochemistry of rock samples from the National Geochemical Database: U.S. Geological Survey, Reston, VA.	U.S. Geological Survey	USGS		36.1333	-114.917	0.01	11	11	11	UNKNOWN	SEDIMENTARY	UNKNOWN	UNKNOWN	DOLOMITE																						3	0.2	20			3
D192068		USGS		Geochemistry of rock samples from the National Geochemical Database: U.S. Geological Survey, Reston, VA.	U.S. Geological Survey	USGS		36.1333	-114.917	0.01	11	11	11	UNKNOWN	SEDIMENTARY	UNKNOWN	UNKNOWN	DOLOMITE																							0.5	300			1
D192069		USGS		Geochemistry of rock samples from the National Geochemical Database: U.S. Geological Survey, Reston, VA.	U.S. Geological Survey	USGS		36.1333	-114.917	0.01	11	11	11	UNKNOWN	SEDIMENTARY	UNKNOWN	UNKNOWN	DOLOMITE																						3	0.3	70			3
D192070		USGS		Geochemistry of rock samples from the National Geochemical Database: U.S. Geological Survey, Reston, VA.	U.S. Geological Survey	USGS		36.1333	-114.917	0.01	11	11	11	UNKNOWN	SEDIMENTARY	UNKNOWN	UNKNOWN	DOLOMITE																						1	0.15	70			1.5
D192072		USGS		Geochemistry of rock samples from the National Geochemical Database: U.S. Geological Survey, Reston, VA.	U.S. Geological Survey	USGS		36.1333	-114.917	0.01	11	11	11	UNKNOWN	SEDIMENTARY	UNKNOWN	UNKNOWN	DOLOMITE																							1	20
D192073		USGS		Geochemistry of rock samples from the National Geochemical Database: U.S. Geological Survey, Reston, VA.	U.S. Geological Survey	USGS		36.1333	-114.917	0.01	11	11	11	UNKNOWN	SEDIMENTARY	UNKNOWN	UNKNOWN	DOLOMITE																							1	150			2
D192075		USGS		Geochemistry of rock samples from the National Geochemical Database: U.S. Geological Survey, Reston, VA.	U.S. Geological Survey	USGS		36.1333	-114.917	0.01	11	11	11	UNKNOWN	SEDIMENTARY	UNKNOWN	UNKNOWN	DOLOMITE																						2	0.2	70			5
D193135		USGS		Geochemistry of rock samples from the National Geochemical Database: U.S. Geological Survey, Reston, VA.	U.S. Geological Survey	USGS		39.7917	-111.733	0.01	71	71	71	UNKNOWN	SEDIMENTARY	UNKNOWN	UNKNOWN	DOLOMITE																						5	0.7	70	15		10				1.5
D201026		USGS		Geochemistry of rock samples from the National Geochemical Database: U.S. Geological Survey, Reston, VA.	U.S. Geological Survey	USGS		38.1303	-118.045	0.01	59	59	59	UNKNOWN	SEDIMENTARY	UNKNOWN	UNKNOWN	DOLOMITE																						5	1	500	20		15
D201381		USGS		Geochemistry of rock samples from the National Geochemical Database: U.S. Geological Survey, Reston, VA.	U.S. Geological Survey	USGS		38.5	-117	0.01	67	67	67	UNKNOWN	SEDIMENTARY	UNKNOWN	UNKNOWN	DOLOMITE																							1	150	20	5	30
D201815		USGS		Geochemistry of rock samples from the National Geochemical Database: U.S. Geological Survey, Reston, VA.	U.S. Geological Survey	USGS		36.99	-91.3239	0.01	69	69	69	UNKNOWN	SEDIMENTARY	UNKNOWN	UNKNOWN	DOLOMITE
D201816		USGS		Geochemistry of rock samples from the National Geochemical Database: U.S. Geological Survey, Reston, VA.	U.S. Geological Survey	USGS		36.99	-91.3239	0.01	67	67	67	UNKNOWN	SEDIMENTARY	UNKNOWN	UNKNOWN	DOLOMITE
D201817		USGS		Geochemistry of rock samples from the National Geochemical Database: U.S. Geological Survey, Reston, VA.	U.S. Geological Survey	USGS		36.99	-91.3239	0.01	67	67	67	UNKNOWN	SEDIMENTARY	UNKNOWN	UNKNOWN	DOLOMITE
D201818		USGS		Geochemistry of rock samples from the National Geochemical Database: U.S. Geological Survey, Reston, VA.	U.S. Geological Survey	USGS		36.99	-91.3239	0.01	67	67	67	UNKNOWN	SEDIMENTARY	UNKNOWN	UNKNOWN	DOLOMITE
D201819		USGS		Geochemistry of rock samples from the National Geochemical Database: U.S. Geological Survey, Reston, VA.	U.S. Geological Survey	USGS		36.99	-91.3239	0.01	67	67	67	UNKNOWN	SEDIMENTARY	UNKNOWN	UNKNOWN	DOLOMITE
D201820		USGS		Geochemistry of rock samples from the National Geochemical Database: U.S. Geological Survey, Reston, VA.	U.S. Geological Survey	USGS		36.99	-91.3239	0.01	67	67	67	UNKNOWN	SEDIMENTARY	UNKNOWN	UNKNOWN	DOLOMITE
D201821		USGS		Geochemistry of rock samples from the National Geochemical Database: U.S. Geological Survey, Reston, VA.	U.S. Geological Survey	USGS		36.99	-91.3239	0.01	67	67	67	UNKNOWN	SEDIMENTARY	UNKNOWN	UNKNOWN	DOLOMITE
D201823		USGS		Geochemistry of rock samples from the National Geochemical Database: U.S. Geological Survey, Reston, VA.	U.S. Geological Survey	USGS		36.99	-91.3239	0.01	67	67	67	UNKNOWN	SEDIMENTARY	UNKNOWN	UNKNOWN	DOLOMITE
D201838		USGS		Geochemistry of rock samples from the National Geochemical Database: U.S. Geological Survey, Reston, VA.	U.S. Geological Survey	USGS		37.5717	-91.2283	0.01	67	67	67	UNKNOWN	SEDIMENTARY	UNKNOWN	UNKNOWN	DOLOMITE
D201842		USGS		Geochemistry of rock samples from the National Geochemical Database: U.S. Geological Survey, Reston, VA.	U.S. Geological Survey	USGS		37.4431	-90.9561	0.01	67	67	67	UNKNOWN	SEDIMENTARY	UNKNOWN	UNKNOWN	DOLOMITE
D201844		USGS		Geochemistry of rock samples from the National Geochemical Database: U.S. Geological Survey, Reston, VA.	U.S. Geological Survey	USGS		37.4431	-90.9561	0.01	67	67	67	UNKNOWN	SEDIMENTARY	UNKNOWN	UNKNOWN	DOLOMITE
D201845		USGS		Geochemistry of rock samples from the National Geochemical Database: U.S. Geological Survey, Reston, VA.	U.S. Geological Survey	USGS		37.2994	-90.9567	0.01	67	67	67	UNKNOWN	SEDIMENTARY	UNKNOWN	UNKNOWN	DOLOMITE
D201846		USGS		Geochemistry of rock samples from the National Geochemical Database: U.S. Geological Survey, Reston, VA.	U.S. Geological Survey	USGS		37.2994	-90.9567	0.01	67	67	67	UNKNOWN	SEDIMENTARY	UNKNOWN	UNKNOWN	DOLOMITE
D201847		USGS		Geochemistry of rock samples from the National Geochemical Database: U.S. Geological Survey, Reston, VA.	U.S. Geological Survey	USGS		37.2994	-90.9567	0.01	67	67	67	UNKNOWN	SEDIMENTARY	UNKNOWN	UNKNOWN	DOLOMITE
D201849		USGS		Geochemistry of rock samples from the National Geochemical Database: U.S. Geological Survey, Reston, VA.	U.S. Geological Survey	USGS		37.2994	-90.9567	0.01	67	67	67	UNKNOWN	SEDIMENTARY	UNKNOWN	UNKNOWN	DOLOMITE
D201850		USGS		Geochemistry of rock samples from the National Geochemical Database: U.S. Geological Survey, Reston, VA.	U.S. Geological Survey	USGS		37.2994	-90.9567	0.01	67	67	67	UNKNOWN	SEDIMENTARY	UNKNOWN	UNKNOWN	DOLOMITE
D201854		USGS		Geochemistry of rock samples from the National Geochemical Database: U.S. Geological Survey, Reston, VA.	U.S. Geological Survey	USGS		37.0397	-90.9653	0.01	67	67	67	UNKNOWN	SEDIMENTARY	UNKNOWN	UNKNOWN	DOLOMITE
D201855		USGS		Geochemistry of rock samples from the National Geochemical Database: U.S. Geological Survey, Reston, VA.	U.S. Geological Survey	USGS		37.0397	-90.9653	0.01	67	67	67	UNKNOWN	SEDIMENTARY	UNKNOWN	UNKNOWN	DOLOMITE
D201856		USGS		Geochemistry of rock samples from the National Geochemical Database: U.S. Geological Survey, Reston, VA.	U.S. Geological Survey	USGS		37.0397	-90.9653	0.01	67	67	67	UNKNOWN	SEDIMENTARY	UNKNOWN	UNKNOWN	DOLOMITE
D201857		USGS		Geochemistry of rock samples from the National Geochemical Database: U.S. Geological Survey, Reston, VA.	U.S. Geological Survey	USGS		37.0397	-90.9653	0.01	67	67	67	UNKNOWN	SEDIMENTARY	UNKNOWN	UNKNOWN	DOLOMITE
D201862		USGS		Geochemistry of rock samples from the National Geochemical Database: U.S. Geological Survey, Reston, VA.	U.S. Geological Survey	USGS		37.1542	-91.09	0.01	67	67	67	UNKNOWN	SEDIMENTARY	UNKNOWN	UNKNOWN	DOLOMITE
D201863		USGS		Geochemistry of rock samples from the National Geochemical Database: U.S. Geological Survey, Reston, VA.	U.S. Geological Survey	USGS		37.1542	-91.09	0.01	67	67	67	UNKNOWN	SEDIMENTARY	UNKNOWN	UNKNOWN	DOLOMITE
D201865		USGS		Geochemistry of rock samples from the National Geochemical Database: U.S. Geological Survey, Reston, VA.	U.S. Geological Survey	USGS		37.1542	-91.09	0.01	67	67	67	UNKNOWN	SEDIMENTARY	UNKNOWN	UNKNOWN	DOLOMITE
D201871		USGS		Geochemistry of rock samples from the National Geochemical Database: U.S. Geological Survey, Reston, VA.	U.S. Geological Survey	USGS		37.3669	-91.9717	0.01	69	69	69	UNKNOWN	SEDIMENTARY	UNKNOWN	UNKNOWN	DOLOMITE
D201872		USGS		Geochemistry of rock samples from the National Geochemical Database: U.S. Geological Survey, Reston, VA.	U.S. Geological Survey	USGS		37.3669	-91.9717	0.01	67	67	67	UNKNOWN	SEDIMENTARY	UNKNOWN	UNKNOWN	DOLOMITE
D201873		USGS		Geochemistry of rock samples from the National Geochemical Database: U.S. Geological Survey, Reston, VA.	U.S. Geological Survey	USGS		37.3669	-91.9717	0.01	67	67	67	UNKNOWN	SEDIMENTARY	UNKNOWN	UNKNOWN	DOLOMITE
D201877		USGS		Geochemistry of rock samples from the National Geochemical Database: U.S. Geological Survey, Reston, VA.	U.S. Geological Survey	USGS		37.3669	-91.9717	0.01	67	67	67	UNKNOWN	SEDIMENTARY	UNKNOWN	UNKNOWN	DOLOMITE
D201880		USGS		Geochemistry of rock samples from the National Geochemical Database: U.S. Geological Survey, Reston, VA.	U.S. Geological Survey	USGS		37.6275	-91.5822	0.01	69	69	69	UNKNOWN	SEDIMENTARY	UNKNOWN	UNKNOWN	DOLOMITE
D201881		USGS		Geochemistry of rock samples from the National Geochemical Database: U.S. Geological Survey, Reston, VA.	U.S. Geological Survey	USGS		37.6275	-91.5822	0.01	69	69	69	UNKNOWN	SEDIMENTARY	UNKNOWN	UNKNOWN	DOLOMITE
D201882		USGS		Geochemistry of rock samples from the National Geochemical Database: U.S. Geological Survey, Reston, VA.	U.S. Geological Survey	USGS		37.6275	-91.5822	0.01	67	67	67	UNKNOWN	SEDIMENTARY	UNKNOWN	UNKNOWN	DOLOMITE
D201883		USGS		Geochemistry of rock samples from the National Geochemical Database: U.S. Geological Survey, Reston, VA.	U.S. Geological Survey	USGS		37.6275	-91.5822	0.01	67	67	67	UNKNOWN	SEDIMENTARY	UNKNOWN	UNKNOWN	DOLOMITE
D201884		USGS		Geochemistry of rock samples from the National Geochemical Database: U.S. Geological Survey, Reston, VA.	U.S. Geological Survey	USGS		37.6275	-91.5822	0.01	67	67	67	UNKNOWN	SEDIMENTARY	UNKNOWN	UNKNOWN	DOLOMITE
D201885		USGS		Geochemistry of rock samples from the National Geochemical Database: U.S. Geological Survey, Reston, VA.	U.S. Geological Survey	USGS		37.6275	-91.5822	0.01	67	67	67	UNKNOWN	SEDIMENTARY	UNKNOWN	UNKNOWN	DOLOMITE
D201886		USGS		Geochemistry of rock samples from the National Geochemical Database: U.S. Geological Survey, Reston, VA.	U.S. Geological Survey	USGS		37.6275	-91.5822	0.01	67	67	67	UNKNOWN	SEDIMENTARY	UNKNOWN	UNKNOWN	DOLOMITE
D201893		USGS		Geochemistry of rock samples from the National Geochemical Database: U.S. Geological Survey, Reston, VA.	U.S. Geological Survey	USGS		37.3125	-91.4294	0.01	69	69	69	UNKNOWN	SEDIMENTARY	UNKNOWN	UNKNOWN	DOLOMITE
D201894		USGS		Geochemistry of rock samples from the National Geochemical Database: U.S. Geological Survey, Reston, VA.	U.S. Geological Survey	USGS		37.3125	-91.4294	0.01	67	67	67	UNKNOWN	SEDIMENTARY	UNKNOWN	UNKNOWN	DOLOMITE
D201895		USGS		Geochemistry of rock samples from the National Geochemical Database: U.S. Geological Survey, Reston, VA.	U.S. Geological Survey	USGS		37.3125	-91.4294	0.01	67	67	67	UNKNOWN	SEDIMENTARY	UNKNOWN	UNKNOWN	DOLOMITE
D201896		USGS		Geochemistry of rock samples from the National Geochemical Database: U.S. Geological Survey, Reston, VA.	U.S. Geological Survey	USGS		37.3125	-91.4294	0.01	67	67	67	UNKNOWN	SEDIMENTARY	UNKNOWN	UNKNOWN	DOLOMITE
D201898		USGS		Geochemistry of rock samples from the National Geochemical Database: U.S. Geological Survey, Reston, VA.	U.S. Geological Survey	USGS		37.3125	-91.4294	0.01	67	67	67	UNKNOWN	SEDIMENTARY	UNKNOWN	UNKNOWN	DOLOMITE
D201900		USGS		Geochemistry of rock samples from the National Geochemical Database: U.S. Geological Survey, Reston, VA.	U.S. Geological Survey	USGS		37.8642	-90.8606	0.01	67	67	67	UNKNOWN	SEDIMENTARY	UNKNOWN	UNKNOWN	DOLOMITE
D201901		USGS		Geochemistry of rock samples from the National Geochemical Database: U.S. Geological Survey, Reston, VA.	U.S. Geological Survey	USGS		37.8642	-90.8606	0.01	67	67	67	UNKNOWN	SEDIMENTARY	UNKNOWN	UNKNOWN	DOLOMITE
D201903		USGS		Geochemistry of rock samples from the National Geochemical Database: U.S. Geological Survey, Reston, VA.	U.S. Geological Survey	USGS		37.8642	-90.8606	0.01	67	67	67	UNKNOWN	SEDIMENTARY	UNKNOWN	UNKNOWN	DOLOMITE
D201907		USGS		Geochemistry of rock samples from the National Geochemical Database: U.S. Geological Survey, Reston, VA.	U.S. Geological Survey	USGS		36.9828	-90.7178	0.01	69	69	69	UNKNOWN	SEDIMENTARY	UNKNOWN	UNKNOWN	DOLOMITE
D201908		USGS		Geochemistry of rock samples from the National Geochemical Database: U.S. Geological Survey, Reston, VA.	U.S. Geological Survey	USGS		36.9828	-90.7178	0.01	67	67	67	UNKNOWN	SEDIMENTARY	UNKNOWN	UNKNOWN	DOLOMITE
D201909		USGS		Geochemistry of rock samples from the National Geochemical Database: U.S. Geological Survey, Reston, VA.	U.S. Geological Survey	USGS		36.9828	-90.7178	0.01	67	67	67	UNKNOWN	SEDIMENTARY	UNKNOWN	UNKNOWN	DOLOMITE
D201910		USGS		Geochemistry of rock samples from the National Geochemical Database: U.S. Geological Survey, Reston, VA.	U.S. Geological Survey	USGS		36.9828	-90.7178	0.01	67	67	67	UNKNOWN	SEDIMENTARY	UNKNOWN	UNKNOWN	DOLOMITE
D201911		USGS		Geochemistry of rock samples from the National Geochemical Database: U.S. Geological Survey, Reston, VA.	U.S. Geological Survey	USGS		36.9828	-90.7178	0.01	67	67	67	UNKNOWN	SEDIMENTARY	UNKNOWN	UNKNOWN	DOLOMITE
D201912		USGS		Geochemistry of rock samples from the National Geochemical Database: U.S. Geological Survey, Reston, VA.	U.S. Geological Survey	USGS		36.9828	-90.7178	0.01	67	67	67	UNKNOWN	SEDIMENTARY	UNKNOWN	UNKNOWN	DOLOMITE
D201915		USGS		Geochemistry of rock samples from the National Geochemical Database: U.S. Geological Survey, Reston, VA.	U.S. Geological Survey	USGS		37.1031	-90.4108	0.01	67	67	67	UNKNOWN	SEDIMENTARY	UNKNOWN	UNKNOWN	DOLOMITE
D201916		USGS		Geochemistry of rock samples from the National Geochemical Database: U.S. Geological Survey, Reston, VA.	U.S. Geological Survey	USGS		37.1031	-90.4108	0.01	67	67	67	UNKNOWN	SEDIMENTARY	UNKNOWN	UNKNOWN	DOLOMITE
D201917		USGS		Geochemistry of rock samples from the National Geochemical Database: U.S. Geological Survey, Reston, VA.	U.S. Geological Survey	USGS		37.1031	-90.4108	0.01	67	67	67	UNKNOWN	SEDIMENTARY	UNKNOWN	UNKNOWN	DOLOMITE
D201918		USGS		Geochemistry of rock samples from the National Geochemical Database: U.S. Geological Survey, Reston, VA.	U.S. Geological Survey	USGS		37.1031	-90.4108	0.01	67	67	67	UNKNOWN	SEDIMENTARY	UNKNOWN	UNKNOWN	DOLOMITE
D201922		USGS		Geochemistry of rock samples from the National Geochemical Database: U.S. Geological Survey, Reston, VA.	U.S. Geological Survey	USGS		37.9669	-90.6944	0.01	67	67	67	UNKNOWN	SEDIMENTARY	UNKNOWN	UNKNOWN	DOLOMITE
D201923		USGS		Geochemistry of rock samples from the National Geochemical Database: U.S. Geological Survey, Reston, VA.	U.S. Geological Survey	USGS		37.9669	-90.6944	0.01	67	67	67	UNKNOWN	SEDIMENTARY	UNKNOWN	UNKNOWN	DOLOMITE
D201927		USGS		Geochemistry of rock samples from the National Geochemical Database: U.S. Geological Survey, Reston, VA.	U.S. Geological Survey	USGS		37.3125	-91.4294	0.01	67	67	67	UNKNOWN	SEDIMENTARY	UNKNOWN	UNKNOWN	DOLOMITE
D201932		USGS		Geochemistry of rock samples from the National Geochemical Database: U.S. Geological Survey, Reston, VA.	U.S. Geological Survey	USGS		37.4581	-90.1511	0.01	67	67	67	UNKNOWN	SEDIMENTARY	UNKNOWN	UNKNOWN	DOLOMITE
D201933		USGS		Geochemistry of rock samples from the National Geochemical Database: U.S. Geological Survey, Reston, VA.	U.S. Geological Survey	USGS		37.4581	-90.1511	0.01	67	67	67	UNKNOWN	SEDIMENTARY	UNKNOWN	UNKNOWN	DOLOMITE
D201935		USGS		Geochemistry of rock samples from the National Geochemical Database: U.S. Geological Survey, Reston, VA.	U.S. Geological Survey	USGS		37.8956	-90.9856	0.01	67	67	67	UNKNOWN	SEDIMENTARY	UNKNOWN	UNKNOWN	DOLOMITE
D201937		USGS		Geochemistry of rock samples from the National Geochemical Database: U.S. Geological Survey, Reston, VA.	U.S. Geological Survey	USGS		37.8956	-90.9856	0.01	67	67	67	UNKNOWN	SEDIMENTARY	UNKNOWN	UNKNOWN	DOLOMITE
D201940		USGS		Geochemistry of rock samples from the National Geochemical Database: U.S. Geological Survey, Reston, VA.	U.S. Geological Survey	USGS		37.8281	-90.6997	0.01	67	67	67	UNKNOWN	SEDIMENTARY	UNKNOWN	UNKNOWN	DOLOMITE
D201941		USGS		Geochemistry of rock samples from the National Geochemical Database: U.S. Geological Survey, Reston, VA.	U.S. Geological Survey	USGS		37.8281	-90.6997	0.01	67	67	67	UNKNOWN	SEDIMENTARY	UNKNOWN	UNKNOWN	DOLOMITE
D201944		USGS		Geochemistry of rock samples from the National Geochemical Database: U.S. Geological Survey, Reston, VA.	U.S. Geological Survey	USGS		37.7147	-91.1172	0.01	67	67	67	UNKNOWN	SEDIMENTARY	UNKNOWN	UNKNOWN	DOLOMITE
D201945		USGS		Geochemistry of rock samples from the National Geochemical Database: U.S. Geological Survey, Reston, VA.	U.S. Geological Survey	USGS		37.7147	-91.1172	0.01	67	67	67	UNKNOWN	SEDIMENTARY	UNKNOWN	UNKNOWN	DOLOMITE
D201947		USGS		Geochemistry of rock samples from the National Geochemical Database: U.S. Geological Survey, Reston, VA.	U.S. Geological Survey	USGS		37.7147	-91.1172	0.01	67	67	67	UNKNOWN	SEDIMENTARY	UNKNOWN	UNKNOWN	DOLOMITE
D201948		USGS		Geochemistry of rock samples from the National Geochemical Database: U.S. Geological Survey, Reston, VA.	U.S. Geological Survey	USGS		37.7147	-91.1172	0.01	67	67	67	UNKNOWN	SEDIMENTARY	UNKNOWN	UNKNOWN	DOLOMITE
D201950		USGS		Geochemistry of rock samples from the National Geochemical Database: U.S. Geological Survey, Reston, VA.	U.S. Geological Survey	USGS		37.5056	-91.9036	0.01	67	67	67	UNKNOWN	SEDIMENTARY	UNKNOWN	UNKNOWN	DOLOMITE
D201951		USGS		Geochemistry of rock samples from the National Geochemical Database: U.S. Geological Survey, Reston, VA.	U.S. Geological Survey	USGS		37.5056	-91.9036	0.01	67	67	67	UNKNOWN	SEDIMENTARY	UNKNOWN	UNKNOWN	DOLOMITE
D201952		USGS		Geochemistry of rock samples from the National Geochemical Database: U.S. Geological Survey, Reston, VA.	U.S. Geological Survey	USGS		37.5056	-91.9036	0.01	67	67	67	UNKNOWN	SEDIMENTARY	UNKNOWN	UNKNOWN	DOLOMITE
D201955		USGS		Geochemistry of rock samples from the National Geochemical Database: U.S. Geological Survey, Reston, VA.	U.S. Geological Survey	USGS		37.6456	-90.7942	0.01	67	67	67	UNKNOWN	SEDIMENTARY	UNKNOWN	UNKNOWN	DOLOMITE
D201957		USGS		Geochemistry of rock samples from the National Geochemical Database: U.S. Geological Survey, Reston, VA.	U.S. Geological Survey	USGS		37.6456	-90.7942	0.01	67	67	67	UNKNOWN	SEDIMENTARY	UNKNOWN	UNKNOWN	DOLOMITE
D201960		USGS		Geochemistry of rock samples from the National Geochemical Database: U.S. Geological Survey, Reston, VA.	U.S. Geological Survey	USGS		39.9678	-90.5406	0.01	67	67	67	UNKNOWN	SEDIMENTARY	UNKNOWN	UNKNOWN	DOLOMITE
D201961		USGS		Geochemistry of rock samples from the National Geochemical Database: U.S. Geological Survey, Reston, VA.	U.S. Geological Survey	USGS		39.9678	-90.5406	0.01	67	67	67	UNKNOWN	SEDIMENTARY	UNKNOWN	UNKNOWN	DOLOMITE
D201965		USGS		Geochemistry of rock samples from the National Geochemical Database: U.S. Geological Survey, Reston, VA.	U.S. Geological Survey	USGS		37.3119	-90.5569	0.01	67	67	67	UNKNOWN	SEDIMENTARY	UNKNOWN	UNKNOWN	DOLOMITE
D201966		USGS		Geochemistry of rock samples from the National Geochemical Database: U.S. Geological Survey, Reston, VA.	U.S. Geological Survey	USGS		37.3119	-90.5569	0.01	67	67	67	UNKNOWN	SEDIMENTARY	UNKNOWN	UNKNOWN	DOLOMITE
D201967		USGS		Geochemistry of rock samples from the National Geochemical Database: U.S. Geological Survey, Reston, VA.	U.S. Geological Survey	USGS		37.3119	-90.5569	0.01	67	67	67	UNKNOWN	SEDIMENTARY	UNKNOWN	UNKNOWN	DOLOMITE
D201969		USGS		Geochemistry of rock samples from the National Geochemical Database: U.S. Geological Survey, Reston, VA.	U.S. Geological Survey	USGS		37.3119	-90.5569	0.01	67	67	67	UNKNOWN	SEDIMENTARY	UNKNOWN	UNKNOWN	DOLOMITE
D201973		USGS		Geochemistry of rock samples from the National Geochemical Database: U.S. Geological Survey, Reston, VA.	U.S. Geological Survey	USGS		37.4239	-90.4467	0.01	67	67	67	UNKNOWN	SEDIMENTARY	UNKNOWN	UNKNOWN	DOLOMITE
D201982		USGS		Geochemistry of rock samples from the National Geochemical Database: U.S. Geological Survey, Reston, VA.	U.S. Geological Survey	USGS		37.2097	-90.3414	0.01	67	67	67	UNKNOWN	SEDIMENTARY	UNKNOWN	UNKNOWN	DOLOMITE
D205721		USGS		Geochemistry of rock samples from the National Geochemical Database: U.S. Geological Survey, Reston, VA.	U.S. Geological Survey	USGS		38.375	-106.25	0.01	68	68	68	UNKNOWN	SEDIMENTARY	UNKNOWN	UNKNOWN	DOLOMITE		42.7	0.19	5.4		1.2		1.2		0.03	8.4	14.7		0.14	1.6	0.05
D205722		USGS		Geochemistry of rock samples from the National Geochemical Database: U.S. Geological Survey, Reston, VA.	U.S. Geological Survey	USGS		38.375	-106.25	0.01	68	68	68	UNKNOWN	SEDIMENTARY	UNKNOWN	UNKNOWN	DOLOMITE		11.9	0.02	1.5		1.3		0.6		0.03	16.9	27.6		0.02	0.38	0.03						3	1.5	300	20		5
D205723		USGS		Geochemistry of rock samples from the National Geochemical Database: U.S. Geological Survey, Reston, VA.	U.S. Geological Survey	USGS		38.375	-106.25	0.01	68	68	68	UNKNOWN	SEDIMENTARY	UNKNOWN	UNKNOWN	DOLOMITE		4.4	0.03	1.2		0.61		0.88		0.08	17.8	29.6		0.01	0.1	0.01
D205724		USGS		Geochemistry of rock samples from the National Geochemical Database: U.S. Geological Survey, Reston, VA.	U.S. Geological Survey	USGS		38.375	-106.25	0.01	68	68	68	UNKNOWN	SEDIMENTARY	UNKNOWN	UNKNOWN	DOLOMITE		24.9	0.07	1.6		2.3		1.6		0.21	12.3	22.6		0.08	0.26	0.03						1	1	500	10		5
D205725		USGS		Geochemistry of rock samples from the National Geochemical Database: U.S. Geological Survey, Reston, VA.	U.S. Geological Survey	USGS		38.375	-106.25	0.01	68	68	68	UNKNOWN	SEDIMENTARY	UNKNOWN	UNKNOWN	DOLOMITE		9.3	0.05	1.3		1.3		0.88		0.1	17.1	25.8		0.01	0.21	0.02
D205726		USGS		Geochemistry of rock samples from the National Geochemical Database: U.S. Geological Survey, Reston, VA.	U.S. Geological Survey	USGS		38.375	-106.25	0.01	68	68	68	UNKNOWN	SEDIMENTARY	UNKNOWN	UNKNOWN	DOLOMITE		5.5	0.01	0.59		1.4		2.5		0.25	16	28.6		0.03	0.07	0.02						0.7	2	700	10		3
D205727		USGS		Geochemistry of rock samples from the National Geochemical Database: U.S. Geological Survey, Reston, VA.	U.S. Geological Survey	USGS		38.375	-106.25	0.01	68	68	68	UNKNOWN	SEDIMENTARY	UNKNOWN	UNKNOWN	DOLOMITE		48.6	0.4	8.3		1.9		1.6		0.09	5.9	10.1		0.09	1.6	0.09
D205728		USGS		Geochemistry of rock samples from the National Geochemical Database: U.S. Geological Survey, Reston, VA.	U.S. Geological Survey	USGS		38.375	-106.25	0.01	68	68	68	UNKNOWN	SEDIMENTARY	UNKNOWN	UNKNOWN	DOLOMITE		12.7	0.08	2		0.81		0.68		0.07	16.8	26.5		0.16	0.57	0.03						3	1.5	500	20		3
D205729		USGS		Geochemistry of rock samples from the National Geochemical Database: U.S. Geological Survey, Reston, VA.	U.S. Geological Survey	USGS		38.375	-106.25	0.01	68	68	68	UNKNOWN	SEDIMENTARY	UNKNOWN	UNKNOWN	DOLOMITE		43.1	0.2	3.5		0.95		0.72		0.09	9.9	15.7		0.02	0.91	0.07
D205730		USGS		Geochemistry of rock samples from the National Geochemical Database: U.S. Geological Survey, Reston, VA.	U.S. Geological Survey	USGS		38.375	-106.25	0.01	68	68	68	UNKNOWN	SEDIMENTARY	UNKNOWN	UNKNOWN	DOLOMITE		55.1	0.41	7.1		4.1		0.84		0.07	5.1	7.4		0.04	1.6	0.07							5	500	300		70		2000
D205731		USGS		Geochemistry of rock samples from the National Geochemical Database: U.S. Geological Survey, Reston, VA.	U.S. Geological Survey	USGS		38.375	-106.25	0.01	68	68	68	UNKNOWN	SEDIMENTARY	UNKNOWN	UNKNOWN	DOLOMITE		62.7	0.02	1		4.1		0.64		0.05	5.8	8.6			0.11	0.03
D205732		USGS		Geochemistry of rock samples from the National Geochemical Database: U.S. Geological Survey, Reston, VA.	U.S. Geological Survey	USGS		38.375	-106.25	0.01	68	68	68	UNKNOWN	SEDIMENTARY	UNKNOWN	UNKNOWN	DOLOMITE		6.9	0.02	0.65		7.9		0.62		0.12	15.9	24.5				0.04						1.5	5	500	100		5
D205733		USGS		Geochemistry of rock samples from the National Geochemical Database: U.S. Geological Survey, Reston, VA.	U.S. Geological Survey	USGS		38.375	-106.25	0.01	68	68	68	UNKNOWN	SEDIMENTARY	UNKNOWN	UNKNOWN	DOLOMITE		27.2	0.03	0.98		1.4		0.12		0.15	13.3	23.8		0.03	0.08	0.05
D205734		USGS		Geochemistry of rock samples from the National Geochemical Database: U.S. Geological Survey, Reston, VA.	U.S. Geological Survey	USGS		38.375	-106.25	0.01	68	68	68	UNKNOWN	SEDIMENTARY	UNKNOWN	UNKNOWN	DOLOMITE		10.3	0.07	1.1		0.61		0.79		0.15	17.4	26.6			0.16	0.03						2	0.7	700	20		7		1500
D205739		USGS		Geochemistry of rock samples from the National Geochemical Database: U.S. Geological Survey, Reston, VA.	U.S. Geological Survey	USGS		38.375	-106.25	0.01	68	68	68	UNKNOWN	SEDIMENTARY	UNKNOWN	UNKNOWN	DOLOMITE		13.8	0.11	1.9		0.48		0.6		0.08	17.2	25.9		0.08	0.5	0.02
D205776		USGS		Geochemistry of rock samples from the National Geochemical Database: U.S. Geological Survey, Reston, VA.	U.S. Geological Survey	USGS		38.375	-106.25	0.01	69	69	69	UNKNOWN	SEDIMENTARY	UNKNOWN	UNKNOWN	DOLOMITE		2		0.5								33			0.07							0.15	0.15	150			5
D205784		USGS		Geochemistry of rock samples from the National Geochemical Database: U.S. Geological Survey, Reston, VA.	U.S. Geological Survey	USGS		38.375	-106.25	0.01	69	69	69	UNKNOWN	SEDIMENTARY	UNKNOWN	UNKNOWN	DOLOMITE		1										35										0.07	0.15	300	5		5
D207328		USGS		Geochemistry of rock samples from the National Geochemical Database: U.S. Geological Survey, Reston, VA.	U.S. Geological Survey	USGS		37.125	-89.75	0.01	69	69	69	UNKNOWN	SEDIMENTARY	UNKNOWN	UNKNOWN	DOLOMITE																								260	7.6		5.7
D207329		USGS		Geochemistry of rock samples from the National Geochemical Database: U.S. Geological Survey, Reston, VA.	U.S. Geological Survey	USGS		37.125	-89.75	0.01	69	69	69	UNKNOWN	SEDIMENTARY	UNKNOWN	UNKNOWN	DOLOMITE																								250	7.3	2.2	3.7
D207332		USGS		Geochemistry of rock samples from the National Geochemical Database: U.S. Geological Survey, Reston, VA.	U.S. Geological Survey	USGS		37.125	-89.75	0.01	69	69	69	UNKNOWN	SEDIMENTARY	UNKNOWN	UNKNOWN	DOLOMITE																								250	6.8	2	3.3
D207337		USGS		Geochemistry of rock samples from the National Geochemical Database: U.S. Geological Survey, Reston, VA.	U.S. Geological Survey	USGS		37.25	-89.875	0.01	69	69	69	UNKNOWN	SEDIMENTARY	UNKNOWN	UNKNOWN	DOLOMITE																								310	7.3	3	3.4
D207338		USGS		Geochemistry of rock samples from the National Geochemical Database: U.S. Geological Survey, Reston, VA.	U.S. Geological Survey	USGS		37.25	-89.875	0.01	69	69	69	UNKNOWN	SEDIMENTARY	UNKNOWN	UNKNOWN	DOLOMITE																								300	9.9	3.8	4.4
D207341		USGS		Geochemistry of rock samples from the National Geochemical Database: U.S. Geological Survey, Reston, VA.	U.S. Geological Survey	USGS		37.25	-89.875	0.01	69	69	69	UNKNOWN	SEDIMENTARY	UNKNOWN	UNKNOWN	DOLOMITE																								230	8.3	2.1	5.8
D207346		USGS		Geochemistry of rock samples from the National Geochemical Database: U.S. Geological Survey, Reston, VA.	U.S. Geological Survey	USGS		37.25	-89.875	0.01	69	69	69	UNKNOWN	SEDIMENTARY	UNKNOWN	UNKNOWN	DOLOMITE																								330	11	3.5	4.4
D207348		USGS		Geochemistry of rock samples from the National Geochemical Database: U.S. Geological Survey, Reston, VA.	U.S. Geological Survey	USGS		37.25	-89.75	0.01	69	69	69	UNKNOWN	SEDIMENTARY	UNKNOWN	UNKNOWN	DOLOMITE																								380	11	3.2	4
D207350		USGS		Geochemistry of rock samples from the National Geochemical Database: U.S. Geological Survey, Reston, VA.	U.S. Geological Survey	USGS		37.375	-89.75	0.01	69	69	69	UNKNOWN	SEDIMENTARY	UNKNOWN	UNKNOWN	DOLOMITE																								410	9.9	4.3	11
D207351		USGS		Geochemistry of rock samples from the National Geochemical Database: U.S. Geological Survey, Reston, VA.	U.S. Geological Survey	USGS		37.5	-89.875	0.01	69	69	69	UNKNOWN	SEDIMENTARY	UNKNOWN	UNKNOWN	DOLOMITE																								210	6.2		5.5
D207352		USGS		Geochemistry of rock samples from the National Geochemical Database: U.S. Geological Survey, Reston, VA.	U.S. Geological Survey	USGS		37.5	-89.875	0.01	69	69	69	UNKNOWN	SEDIMENTARY	UNKNOWN	UNKNOWN	DOLOMITE																								330	8.5	3.2	7.3
D207378		USGS		Geochemistry of rock samples from the National Geochemical Database: U.S. Geological Survey, Reston, VA.	U.S. Geological Survey	USGS		46.4833	-89.8667	0.01	72	72	72	UNKNOWN	SEDIMENTARY	UNKNOWN	UNKNOWN	DOLOMITE																							2.4		13	1.3	14
D214344		USGS		Geochemistry of rock samples from the National Geochemical Database: U.S. Geological Survey, Reston, VA.	U.S. Geological Survey	USGS		39.9297	-113.104	0.01	3	3	3	UNKNOWN	SEDIMENTARY	UNKNOWN	UNKNOWN	DOLOMITE																							1.1	410	14	7.9	4.5
D218118		USGS		Geochemistry of rock samples from the National Geochemical Database: U.S. Geological Survey, Reston, VA.	U.S. Geological Survey	USGS		38.6181	-112.836	0.01	67	67	67	UNKNOWN	SEDIMENTARY	UNKNOWN	UNKNOWN	DOLOMITE																						14		830	68	46	16
D218208		USGS		Geochemistry of rock samples from the National Geochemical Database: U.S. Geological Survey, Reston, VA.	U.S. Geological Survey	USGS		38.9	-105.983	0.01	55	55	55	UNKNOWN	SEDIMENTARY	UNKNOWN	UNKNOWN	DOLOMITE																							2.2	840	16	9.2	9		270
D219510		USGS		Geochemistry of rock samples from the National Geochemical Database: U.S. Geological Survey, Reston, VA.	U.S. Geological Survey	USGS		56.8833	-133.667	0.01	71	71	71	DNAA	SEDIMENTARY	UNKNOWN	UNKNOWN	DOLOMITE
D219509		USGS		Geochemistry of rock samples from the National Geochemical Database: U.S. Geological Survey, Reston, VA.	U.S. Geological Survey	USGS		56.8833	-133.667	0.01	71	71	71	ES	SEDIMENTARY	UNKNOWN	UNKNOWN	DOLOMITE																						3	0.5	500	10		10
D219509		USGS		Geochemistry of rock samples from the National Geochemical Database: U.S. Geological Survey, Reston, VA.	U.S. Geological Survey	USGS		56.8833	-133.667	0.01	71	71	71	DNAA	SEDIMENTARY	UNKNOWN	UNKNOWN	DOLOMITE
D219510		USGS		Geochemistry of rock samples from the National Geochemical Database: U.S. Geological Survey, Reston, VA.	U.S. Geological Survey	USGS		56.8833	-133.667	0.01	71	71	71	ES	SEDIMENTARY	UNKNOWN	UNKNOWN	DOLOMITE																						3	0.2	300			3
D219511		USGS		Geochemistry of rock samples from the National Geochemical Database: U.S. Geological Survey, Reston, VA.	U.S. Geological Survey	USGS		56.8833	-133.667	0.01	71	71	71	DNAA	SEDIMENTARY	UNKNOWN	UNKNOWN	DOLOMITE
D219511		USGS		Geochemistry of rock samples from the National Geochemical Database: U.S. Geological Survey, Reston, VA.	U.S. Geological Survey	USGS		56.8833	-133.667	0.01	71	71	71	ES	SEDIMENTARY	UNKNOWN	UNKNOWN	DOLOMITE																						3	0.5	500	10		15
D236394		USGS		Geochemistry of rock samples from the National Geochemical Database: U.S. Geological Survey, Reston, VA.	U.S. Geological Survey	USGS		34.375	-111.75	0.01	55	55	55	DNAA	SEDIMENTARY	UNKNOWN	UNKNOWN	DOLOMITE
D236412		USGS		Geochemistry of rock samples from the National Geochemical Database: U.S. Geological Survey, Reston, VA.	U.S. Geological Survey	USGS		34.375	-111.75	0.01	55	55	55	DNAA	SEDIMENTARY	UNKNOWN	UNKNOWN	DOLOMITE
D236413		USGS		Geochemistry of rock samples from the National Geochemical Database: U.S. Geological Survey, Reston, VA.	U.S. Geological Survey	USGS		34.375	-111.75	0.01	55	55	55	DNAA	SEDIMENTARY	UNKNOWN	UNKNOWN	DOLOMITE
D236662		USGS		Geochemistry of rock samples from the National Geochemical Database: U.S. Geological Survey, Reston, VA.	U.S. Geological Survey	USGS		56.75	-133.667	0.01	71	69.5	68	XRF	SEDIMENTARY	UNKNOWN	UNKNOWN	DOLOMITE		6.93	0.05	1.59						0.16	16.9	31.1			0.46	0.18
D241192		USGS		Geochemistry of rock samples from the National Geochemical Database: U.S. Geological Survey, Reston, VA.	U.S. Geological Survey	USGS		34.8717	-119.209	0.01				DNAA	SEDIMENTARY	UNKNOWN	UNKNOWN	DOLOMITE
D241193		USGS		Geochemistry of rock samples from the National Geochemical Database: U.S. Geological Survey, Reston, VA.	U.S. Geological Survey	USGS		34.8719	-119.208	0.01				DNAA	SEDIMENTARY	UNKNOWN	UNKNOWN	DOLOMITE
D241575		USGS		Geochemistry of rock samples from the National Geochemical Database: U.S. Geological Survey, Reston, VA.	U.S. Geological Survey	USGS		37.9667	-108.867	0.01	56	56	56	DNAA	SEDIMENTARY	UNKNOWN	UNKNOWN	DOLOMITE
D241575		USGS		Geochemistry of rock samples from the National Geochemical Database: U.S. Geological Survey, Reston, VA.	U.S. Geological Survey	USGS		37.9667	-108.867	0.01	56	56	56	ICPAES	SEDIMENTARY	UNKNOWN	UNKNOWN	DOLOMITE																							0.16	59			3
D244581		USGS		Geochemistry of rock samples from the National Geochemical Database: U.S. Geological Survey, Reston, VA.	U.S. Geological Survey	USGS		37.1083	-95.0044	0.01	67	67	67	ES	SEDIMENTARY	UNKNOWN	UNKNOWN	DOLOMITE																						0.15	0.03	70			3
D244583		USGS		Geochemistry of rock samples from the National Geochemical Database: U.S. Geological Survey, Reston, VA.	U.S. Geological Survey	USGS		36.625	-90.95	0.01	67	67	67	ES	SEDIMENTARY	UNKNOWN	UNKNOWN	DOLOMITE																						2	0.3	150	7		7
D244585		USGS		Geochemistry of rock samples from the National Geochemical Database: U.S. Geological Survey, Reston, VA.	U.S. Geological Survey	USGS		36.5833	-91.0333	0.01	67	67	67	ES	SEDIMENTARY	UNKNOWN	UNKNOWN	DOLOMITE																						3	0.3	150			7
D244586		USGS		Geochemistry of rock samples from the National Geochemical Database: U.S. Geological Survey, Reston, VA.	U.S. Geological Survey	USGS		36.5833	-91.0333	0.01	67	67	67	ES	SEDIMENTARY	UNKNOWN	UNKNOWN	DOLOMITE																						0.3	0.5	150			7		200
D246693		USGS		Geochemistry of rock samples from the National Geochemical Database: U.S. Geological Survey, Reston, VA.	U.S. Geological Survey	USGS		34.4733	-99.4872	0.01	71	71	71	ES	SEDIMENTARY	UNKNOWN	UNKNOWN	DOLOMITE																						1.5	0.7	3000	7		70
D253785		USGS		Geochemistry of rock samples from the National Geochemical Database: U.S. Geological Survey, Reston, VA.	U.S. Geological Survey	USGS		-0.5	167	0.01	6	4.5	3	ICPAES	SEDIMENTARY	UNKNOWN	UNKNOWN	DOLOMITE
D255303		USGS		Geochemistry of rock samples from the National Geochemical Database: U.S. Geological Survey, Reston, VA.	U.S. Geological Survey	USGS		38	-109.625	0.01	70	70	70	XRF	SEDIMENTARY	UNKNOWN	UNKNOWN	DOLOMITE		39.6	0.27	15.8							23.7	0.35		0.43	2.07	0.16
D258523		USGS		Geochemistry of rock samples from the National Geochemical Database: U.S. Geological Survey, Reston, VA.	U.S. Geological Survey	USGS		36.5833	-112.798	0.01	71	71	71	AAS	SEDIMENTARY	UNKNOWN	UNKNOWN	DOLOMITE
D258523		USGS		Geochemistry of rock samples from the National Geochemical Database: U.S. Geological Survey, Reston, VA.	U.S. Geological Survey	USGS		36.5833	-112.798	0.01	71	71	71	DNAA	SEDIMENTARY	UNKNOWN	UNKNOWN	DOLOMITE
D258523		USGS		Geochemistry of rock samples from the National Geochemical Database: U.S. Geological Survey, Reston, VA.	U.S. Geological Survey	USGS		36.5833	-112.798	0.01	71	71	71	ICPAES	SEDIMENTARY	UNKNOWN	UNKNOWN	DOLOMITE																							0.11	67	5	2	2		19
D258523		USGS		Geochemistry of rock samples from the National Geochemical Database: U.S. Geological Survey, Reston, VA.	U.S. Geological Survey	USGS		36.5833	-112.798	0.01	71	71	71	NAA	SEDIMENTARY	UNKNOWN	UNKNOWN	DOLOMITE																							0.105			0.228			23.4
D258523		USGS		Geochemistry of rock samples from the National Geochemical Database: U.S. Geological Survey, Reston, VA.	U.S. Geological Survey	USGS		36.5833	-112.798	0.01	71	71	71	UNKNOWN	SEDIMENTARY	UNKNOWN	UNKNOWN	DOLOMITE
D258523		USGS		Geochemistry of rock samples from the National Geochemical Database: U.S. Geological Survey, Reston, VA.	U.S. Geological Survey	USGS		36.5833	-112.798	0.01	71	71	71	XRF	SEDIMENTARY	UNKNOWN	UNKNOWN	DOLOMITE		26.2	0.05	0.89							15.1	22.7			0.39	0.43
D258533		USGS		Geochemistry of rock samples from the National Geochemical Database: U.S. Geological Survey, Reston, VA.	U.S. Geological Survey	USGS		36.5833	-112.798	0.01	71	71	71	AAS	SEDIMENTARY	UNKNOWN	UNKNOWN	DOLOMITE
D258533		USGS		Geochemistry of rock samples from the National Geochemical Database: U.S. Geological Survey, Reston, VA.	U.S. Geological Survey	USGS		36.5833	-112.798	0.01	71	71	71	DNAA	SEDIMENTARY	UNKNOWN	UNKNOWN	DOLOMITE
D258533		USGS		Geochemistry of rock samples from the National Geochemical Database: U.S. Geological Survey, Reston, VA.	U.S. Geological Survey	USGS		36.5833	-112.798	0.01	71	71	71	ICPAES	SEDIMENTARY	UNKNOWN	UNKNOWN	DOLOMITE																							0.13	80	6	2	2		5
D258533		USGS		Geochemistry of rock samples from the National Geochemical Database: U.S. Geological Survey, Reston, VA.	U.S. Geological Survey	USGS		36.5833	-112.798	0.01	71	71	71	NAA	SEDIMENTARY	UNKNOWN	UNKNOWN	DOLOMITE																							0.106			0.316			13.9
D258533		USGS		Geochemistry of rock samples from the National Geochemical Database: U.S. Geological Survey, Reston, VA.	U.S. Geological Survey	USGS		36.5833	-112.798	0.01	71	71	71	UNKNOWN	SEDIMENTARY	UNKNOWN	UNKNOWN	DOLOMITE
D258533		USGS		Geochemistry of rock samples from the National Geochemical Database: U.S. Geological Survey, Reston, VA.	U.S. Geological Survey	USGS		36.5833	-112.798	0.01	71	71	71	XRF	SEDIMENTARY	UNKNOWN	UNKNOWN	DOLOMITE		5.01		0.65							19.8	29.4			0.18	0.42
D258537		USGS		Geochemistry of rock samples from the National Geochemical Database: U.S. Geological Survey, Reston, VA.	U.S. Geological Survey	USGS		36.5833	-112.798	0.01	71	71	71	AAS	SEDIMENTARY	UNKNOWN	UNKNOWN	DOLOMITE
D258537		USGS		Geochemistry of rock samples from the National Geochemical Database: U.S. Geological Survey, Reston, VA.	U.S. Geological Survey	USGS		36.5833	-112.798	0.01	71	71	71	DNAA	SEDIMENTARY	UNKNOWN	UNKNOWN	DOLOMITE
D258537		USGS		Geochemistry of rock samples from the National Geochemical Database: U.S. Geological Survey, Reston, VA.	U.S. Geological Survey	USGS		36.5833	-112.798	0.01	71	71	71	ICPAES	SEDIMENTARY	UNKNOWN	UNKNOWN	DOLOMITE																							0.24	270	6	2	3	9	240
D258537		USGS		Geochemistry of rock samples from the National Geochemical Database: U.S. Geological Survey, Reston, VA.	U.S. Geological Survey	USGS		36.5833	-112.798	0.01	71	71	71	NAA	SEDIMENTARY	UNKNOWN	UNKNOWN	DOLOMITE																							0.23			0.577			188
D258537		USGS		Geochemistry of rock samples from the National Geochemical Database: U.S. Geological Survey, Reston, VA.	U.S. Geological Survey	USGS		36.5833	-112.798	0.01	71	71	71	UNKNOWN	SEDIMENTARY	UNKNOWN	UNKNOWN	DOLOMITE
D258537		USGS		Geochemistry of rock samples from the National Geochemical Database: U.S. Geological Survey, Reston, VA.	U.S. Geological Survey	USGS		36.5833	-112.798	0.01	71	71	71	XRF	SEDIMENTARY	UNKNOWN	UNKNOWN	DOLOMITE		3.22		0.46							20.1	30.1			0.07
D258548		USGS		Geochemistry of rock samples from the National Geochemical Database: U.S. Geological Survey, Reston, VA.	U.S. Geological Survey	USGS		36.5833	-112.798	0.01	71	71	71	AAS	SEDIMENTARY	UNKNOWN	UNKNOWN	DOLOMITE
D258548		USGS		Geochemistry of rock samples from the National Geochemical Database: U.S. Geological Survey, Reston, VA.	U.S. Geological Survey	USGS		36.5833	-112.798	0.01	71	71	71	DNAA	SEDIMENTARY	UNKNOWN	UNKNOWN	DOLOMITE
D258548		USGS		Geochemistry of rock samples from the National Geochemical Database: U.S. Geological Survey, Reston, VA.	U.S. Geological Survey	USGS		36.5833	-112.798	0.01	71	71	71	ICPAES	SEDIMENTARY	UNKNOWN	UNKNOWN	DOLOMITE																							0.59	300	57	7	20	3	770	10
D258548		USGS		Geochemistry of rock samples from the National Geochemical Database: U.S. Geological Survey, Reston, VA.	U.S. Geological Survey	USGS		36.5833	-112.798	0.01	71	71	71	NAA	SEDIMENTARY	UNKNOWN	UNKNOWN	DOLOMITE																							0.575			4.09			611
D258548		USGS		Geochemistry of rock samples from the National Geochemical Database: U.S. Geological Survey, Reston, VA.	U.S. Geological Survey	USGS		36.5833	-112.798	0.01	71	71	71	UNKNOWN	SEDIMENTARY	UNKNOWN	UNKNOWN	DOLOMITE
D258548		USGS		Geochemistry of rock samples from the National Geochemical Database: U.S. Geological Survey, Reston, VA.	U.S. Geological Survey	USGS		36.5833	-112.798	0.01	71	71	71	XRF	SEDIMENTARY	UNKNOWN	UNKNOWN	DOLOMITE		8.24	0.03	1.04						0.02	18.4	27.2			0.32	0.22
D258550		USGS		Geochemistry of rock samples from the National Geochemical Database: U.S. Geological Survey, Reston, VA.	U.S. Geological Survey	USGS		36.5833	-112.798	0.01	71	71	71	DNAA	SEDIMENTARY	UNKNOWN	UNKNOWN	DOLOMITE
D258550		USGS		Geochemistry of rock samples from the National Geochemical Database: U.S. Geological Survey, Reston, VA.	U.S. Geological Survey	USGS		36.5833	-112.798	0.01	71	71	71	ICPAES	SEDIMENTARY	UNKNOWN	UNKNOWN	DOLOMITE																							0.19	160	3	1	3		12
D258550		USGS		Geochemistry of rock samples from the National Geochemical Database: U.S. Geological Survey, Reston, VA.	U.S. Geological Survey	USGS		36.5833	-112.798	0.01	71	71	71	NAA	SEDIMENTARY	UNKNOWN	UNKNOWN	DOLOMITE																							0.187			0.27			9.58
D258550		USGS		Geochemistry of rock samples from the National Geochemical Database: U.S. Geological Survey, Reston, VA.	U.S. Geological Survey	USGS		36.5833	-112.798	0.01	71	71	71	UNKNOWN	SEDIMENTARY	UNKNOWN	UNKNOWN	DOLOMITE
D258550		USGS		Geochemistry of rock samples from the National Geochemical Database: U.S. Geological Survey, Reston, VA.	U.S. Geological Survey	USGS		36.5833	-112.798	0.01	71	71	71	XRF	SEDIMENTARY	UNKNOWN	UNKNOWN	DOLOMITE		56.5		0.3							8.8	13.4			0.07	0.14
D259899		USGS		Geochemistry of rock samples from the National Geochemical Database: U.S. Geological Survey, Reston, VA.	U.S. Geological Survey	USGS		36.125	-113.007	0.01	71	71	71	DNAA	SEDIMENTARY	UNKNOWN	UNKNOWN	DOLOMITE
D259899		USGS		Geochemistry of rock samples from the National Geochemical Database: U.S. Geological Survey, Reston, VA.	U.S. Geological Survey	USGS		36.125	-113.007	0.01	71	71	71	ICPAES	SEDIMENTARY	UNKNOWN	UNKNOWN	DOLOMITE																							0.74	970	7	6	28		270	60
D260764		USGS		Geochemistry of rock samples from the National Geochemical Database: U.S. Geological Survey, Reston, VA.	U.S. Geological Survey	USGS		36.125	-113.007	0.01	71	71	71	DNAA	SEDIMENTARY	UNKNOWN	UNKNOWN	DOLOMITE
D260764		USGS		Geochemistry of rock samples from the National Geochemical Database: U.S. Geological Survey, Reston, VA.	U.S. Geological Survey	USGS		36.125	-113.007	0.01	71	71	71	ICPAES	SEDIMENTARY	UNKNOWN	UNKNOWN	DOLOMITE																							0.72	1900	6	3	12	6	950	10
D260785		USGS		Geochemistry of rock samples from the National Geochemical Database: U.S. Geological Survey, Reston, VA.	U.S. Geological Survey	USGS		42.875	-102.75	0.01	15	15	15	DNAA	SEDIMENTARY	UNKNOWN	UNKNOWN	DOLOMITE
D260785		USGS		Geochemistry of rock samples from the National Geochemical Database: U.S. Geological Survey, Reston, VA.	U.S. Geological Survey	USGS		42.875	-102.75	0.01	15	15	15	ICPAES	SEDIMENTARY	UNKNOWN	UNKNOWN	DOLOMITE																							1.4	3300	8	6	7		35
D260785		USGS		Geochemistry of rock samples from the National Geochemical Database: U.S. Geological Survey, Reston, VA.	U.S. Geological Survey	USGS		42.875	-102.75	0.01	15	15	15	XRF	SEDIMENTARY	UNKNOWN	UNKNOWN	DOLOMITE		30	0.24	6.22						0.44	10.3	17.9		0.78	1.54	0.12
D261160		USGS		Geochemistry of rock samples from the National Geochemical Database: U.S. Geological Survey, Reston, VA.	U.S. Geological Survey	USGS		36.125	-113.007	0.01	71	71	71	DNAA	SEDIMENTARY	UNKNOWN	UNKNOWN	DOLOMITE
D261160		USGS		Geochemistry of rock samples from the National Geochemical Database: U.S. Geological Survey, Reston, VA.	U.S. Geological Survey	USGS		36.125	-113.007	0.01	71	71	71	ICPAES	SEDIMENTARY	UNKNOWN	UNKNOWN	DOLOMITE																							0.67	1300	6	2	18		710	20
D261171		USGS		Geochemistry of rock samples from the National Geochemical Database: U.S. Geological Survey, Reston, VA.	U.S. Geological Survey	USGS		36.125	-113.007	0.01	71	71	71	DNAA	SEDIMENTARY	UNKNOWN	UNKNOWN	DOLOMITE
D261171		USGS		Geochemistry of rock samples from the National Geochemical Database: U.S. Geological Survey, Reston, VA.	U.S. Geological Survey	USGS		36.125	-113.007	0.01	71	71	71	ICPAES	SEDIMENTARY	UNKNOWN	UNKNOWN	DOLOMITE																							0.44	1700	5	1	3		210
D261174		USGS		Geochemistry of rock samples from the National Geochemical Database: U.S. Geological Survey, Reston, VA.	U.S. Geological Survey	USGS		36.125	-113.007	0.01	71	71	71	DNAA	SEDIMENTARY	UNKNOWN	UNKNOWN	DOLOMITE
D261174		USGS		Geochemistry of rock samples from the National Geochemical Database: U.S. Geological Survey, Reston, VA.	U.S. Geological Survey	USGS		36.125	-113.007	0.01	71	71	71	ICPAES	SEDIMENTARY	UNKNOWN	UNKNOWN	DOLOMITE																							0.46	1700	5	2	3		230
D261175		USGS		Geochemistry of rock samples from the National Geochemical Database: U.S. Geological Survey, Reston, VA.	U.S. Geological Survey	USGS		36.125	-113.007	0.01	71	71	71	DNAA	SEDIMENTARY	UNKNOWN	UNKNOWN	DOLOMITE
D261175		USGS		Geochemistry of rock samples from the National Geochemical Database: U.S. Geological Survey, Reston, VA.	U.S. Geological Survey	USGS		36.125	-113.007	0.01	71	71	71	ICPAES	SEDIMENTARY	UNKNOWN	UNKNOWN	DOLOMITE																							0.62	1400	6	2	17		680	20
D261177		USGS		Geochemistry of rock samples from the National Geochemical Database: U.S. Geological Survey, Reston, VA.	U.S. Geological Survey	USGS		36.125	-113.007	0.01	71	71	71	AAS	SEDIMENTARY	UNKNOWN	UNKNOWN	DOLOMITE
D261177		USGS		Geochemistry of rock samples from the National Geochemical Database: U.S. Geological Survey, Reston, VA.	U.S. Geological Survey	USGS		36.125	-113.007	0.01	71	71	71	DNAA	SEDIMENTARY	UNKNOWN	UNKNOWN	DOLOMITE
D261177		USGS		Geochemistry of rock samples from the National Geochemical Database: U.S. Geological Survey, Reston, VA.	U.S. Geological Survey	USGS		36.125	-113.007	0.01	71	71	71	ICPAES	SEDIMENTARY	UNKNOWN	UNKNOWN	DOLOMITE																							0.44	800	5	3	5		300
D261177		USGS		Geochemistry of rock samples from the National Geochemical Database: U.S. Geological Survey, Reston, VA.	U.S. Geological Survey	USGS		36.125	-113.007	0.01	71	71	71	NAA	SEDIMENTARY	UNKNOWN	UNKNOWN	DOLOMITE																							0.43			1.33			238
D261177		USGS		Geochemistry of rock samples from the National Geochemical Database: U.S. Geological Survey, Reston, VA.	U.S. Geological Survey	USGS		36.125	-113.007	0.01	71	71	71	UNKNOWN	SEDIMENTARY	UNKNOWN	UNKNOWN	DOLOMITE
D261177		USGS		Geochemistry of rock samples from the National Geochemical Database: U.S. Geological Survey, Reston, VA.	U.S. Geological Survey	USGS		36.125	-113.007	0.01	71	71	71	XRF	SEDIMENTARY	UNKNOWN	UNKNOWN	DOLOMITE		26.7		0.59						0.09	14.8	22.2			0.16	0.14
D261178		USGS		Geochemistry of rock samples from the National Geochemical Database: U.S. Geological Survey, Reston, VA.	U.S. Geological Survey	USGS		36.125	-113.007	0.01	71	71	71	AAS	SEDIMENTARY	UNKNOWN	UNKNOWN	DOLOMITE
D261178		USGS		Geochemistry of rock samples from the National Geochemical Database: U.S. Geological Survey, Reston, VA.	U.S. Geological Survey	USGS		36.125	-113.007	0.01	71	71	71	DNAA	SEDIMENTARY	UNKNOWN	UNKNOWN	DOLOMITE
D261178		USGS		Geochemistry of rock samples from the National Geochemical Database: U.S. Geological Survey, Reston, VA.	U.S. Geological Survey	USGS		36.125	-113.007	0.01	71	71	71	ICPAES	SEDIMENTARY	UNKNOWN	UNKNOWN	DOLOMITE																							11	530	64	18	18		17	2800
D261178		USGS		Geochemistry of rock samples from the National Geochemical Database: U.S. Geological Survey, Reston, VA.	U.S. Geological Survey	USGS		36.125	-113.007	0.01	71	71	71	NAA	SEDIMENTARY	UNKNOWN	UNKNOWN	DOLOMITE																							10.6			16.6			18.9
D261178		USGS		Geochemistry of rock samples from the National Geochemical Database: U.S. Geological Survey, Reston, VA.	U.S. Geological Survey	USGS		36.125	-113.007	0.01	71	71	71	UNKNOWN	SEDIMENTARY	UNKNOWN	UNKNOWN	DOLOMITE
D261178		USGS		Geochemistry of rock samples from the National Geochemical Database: U.S. Geological Survey, Reston, VA.	U.S. Geological Survey	USGS		36.125	-113.007	0.01	71	71	71	XRF	SEDIMENTARY	UNKNOWN	UNKNOWN	DOLOMITE		47.2	0.07	1.26						0.06	6.66	10.7			0.38	0.64
D261181		USGS		Geochemistry of rock samples from the National Geochemical Database: U.S. Geological Survey, Reston, VA.	U.S. Geological Survey	USGS		36.125	-113.007	0.01	71	71	71	AAS	SEDIMENTARY	UNKNOWN	UNKNOWN	DOLOMITE
D261181		USGS		Geochemistry of rock samples from the National Geochemical Database: U.S. Geological Survey, Reston, VA.	U.S. Geological Survey	USGS		36.125	-113.007	0.01	71	71	71	DNAA	SEDIMENTARY	UNKNOWN	UNKNOWN	DOLOMITE
D261181		USGS		Geochemistry of rock samples from the National Geochemical Database: U.S. Geological Survey, Reston, VA.	U.S. Geological Survey	USGS		36.125	-113.007	0.01	71	71	71	ICPAES	SEDIMENTARY	UNKNOWN	UNKNOWN	DOLOMITE																							1.2	1200	12	7	15		130	110
D261181		USGS		Geochemistry of rock samples from the National Geochemical Database: U.S. Geological Survey, Reston, VA.	U.S. Geological Survey	USGS		36.125	-113.007	0.01	71	71	71	NAA	SEDIMENTARY	UNKNOWN	UNKNOWN	DOLOMITE																							1.13			5.24			107
D261181		USGS		Geochemistry of rock samples from the National Geochemical Database: U.S. Geological Survey, Reston, VA.	U.S. Geological Survey	USGS		36.125	-113.007	0.01	71	71	71	UNKNOWN	SEDIMENTARY	UNKNOWN	UNKNOWN	DOLOMITE
D261181		USGS		Geochemistry of rock samples from the National Geochemical Database: U.S. Geological Survey, Reston, VA.	U.S. Geological Survey	USGS		36.125	-113.007	0.01	71	71	71	XRF	SEDIMENTARY	UNKNOWN	UNKNOWN	DOLOMITE		22.3		0.34						0.14	15.5	23.8			0.09	0.2
D261183		USGS		Geochemistry of rock samples from the National Geochemical Database: U.S. Geological Survey, Reston, VA.	U.S. Geological Survey	USGS		36.125	-113.007	0.01	71	71	71	AAS	SEDIMENTARY	UNKNOWN	UNKNOWN	DOLOMITE
D261183		USGS		Geochemistry of rock samples from the National Geochemical Database: U.S. Geological Survey, Reston, VA.	U.S. Geological Survey	USGS		36.125	-113.007	0.01	71	71	71	DNAA	SEDIMENTARY	UNKNOWN	UNKNOWN	DOLOMITE
D261183		USGS		Geochemistry of rock samples from the National Geochemical Database: U.S. Geological Survey, Reston, VA.	U.S. Geological Survey	USGS		36.125	-113.007	0.01	71	71	71	ICPAES	SEDIMENTARY	UNKNOWN	UNKNOWN	DOLOMITE																							12	590	71	21	20		20	3100
D261183		USGS		Geochemistry of rock samples from the National Geochemical Database: U.S. Geological Survey, Reston, VA.	U.S. Geological Survey	USGS		36.125	-113.007	0.01	71	71	71	NAA	SEDIMENTARY	UNKNOWN	UNKNOWN	DOLOMITE																							10.8			16.9			20.2
D261183		USGS		Geochemistry of rock samples from the National Geochemical Database: U.S. Geological Survey, Reston, VA.	U.S. Geological Survey	USGS		36.125	-113.007	0.01	71	71	71	UNKNOWN	SEDIMENTARY	UNKNOWN	UNKNOWN	DOLOMITE
D261183		USGS		Geochemistry of rock samples from the National Geochemical Database: U.S. Geological Survey, Reston, VA.	U.S. Geological Survey	USGS		36.125	-113.007	0.01	71	71	71	XRF	SEDIMENTARY	UNKNOWN	UNKNOWN	DOLOMITE		48.5	0.06	1.23						0.06	6.34	10.2			0.37	0.63
D261484		USGS		Geochemistry of rock samples from the National Geochemical Database: U.S. Geological Survey, Reston, VA.	U.S. Geological Survey	USGS		36.125	-113.007	0.01	71	71	71	DNAA	SEDIMENTARY	UNKNOWN	UNKNOWN	DOLOMITE
D261484		USGS		Geochemistry of rock samples from the National Geochemical Database: U.S. Geological Survey, Reston, VA.	U.S. Geological Survey	USGS		36.125	-113.007	0.01	71	71	71	ICPAES	SEDIMENTARY	UNKNOWN	UNKNOWN	DOLOMITE																							0.55	1500	6	2	41	50	5600
D261492		USGS		Geochemistry of rock samples from the National Geochemical Database: U.S. Geological Survey, Reston, VA.	U.S. Geological Survey	USGS		36.125	-113.007	0.01	71	71	71	DNAA	SEDIMENTARY	UNKNOWN	UNKNOWN	DOLOMITE
D261492		USGS		Geochemistry of rock samples from the National Geochemical Database: U.S. Geological Survey, Reston, VA.	U.S. Geological Survey	USGS		36.125	-113.007	0.01	71	71	71	ICPAES	SEDIMENTARY	UNKNOWN	UNKNOWN	DOLOMITE																							0.9	820	8	2	20	3	1100	10
D261498		USGS		Geochemistry of rock samples from the National Geochemical Database: U.S. Geological Survey, Reston, VA.	U.S. Geological Survey	USGS		36.125	-113.007	0.01	71	71	71	DNAA	SEDIMENTARY	UNKNOWN	UNKNOWN	DOLOMITE
D261498		USGS		Geochemistry of rock samples from the National Geochemical Database: U.S. Geological Survey, Reston, VA.	U.S. Geological Survey	USGS		36.125	-113.007	0.01	71	71	71	ICPAES	SEDIMENTARY	UNKNOWN	UNKNOWN	DOLOMITE																							0.98	820	6	2	20	4	1200	10
D261501		USGS		Geochemistry of rock samples from the National Geochemical Database: U.S. Geological Survey, Reston, VA.	U.S. Geological Survey	USGS		36.125	-113.007	0.01	71	71	71	DNAA	SEDIMENTARY	UNKNOWN	UNKNOWN	DOLOMITE
D261501		USGS		Geochemistry of rock samples from the National Geochemical Database: U.S. Geological Survey, Reston, VA.	U.S. Geological Survey	USGS		36.125	-113.007	0.01	71	71	71	ICPAES	SEDIMENTARY	UNKNOWN	UNKNOWN	DOLOMITE																							1.2	530	18	8	68		500	20
D261504		USGS		Geochemistry of rock samples from the National Geochemical Database: U.S. Geological Survey, Reston, VA.	U.S. Geological Survey	USGS		36.125	-113.007	0.01	71	71	71	DNAA	SEDIMENTARY	UNKNOWN	UNKNOWN	DOLOMITE
D261504		USGS		Geochemistry of rock samples from the National Geochemical Database: U.S. Geological Survey, Reston, VA.	U.S. Geological Survey	USGS		36.125	-113.007	0.01	71	71	71	ICPAES	SEDIMENTARY	UNKNOWN	UNKNOWN	DOLOMITE																							0.82	1300	12	3	4		300	20
D261652		USGS		Geochemistry of rock samples from the National Geochemical Database: U.S. Geological Survey, Reston, VA.	U.S. Geological Survey	USGS		36.125	-113.007	0.01	71	71	71	AAS	SEDIMENTARY	UNKNOWN	UNKNOWN	DOLOMITE
D261652		USGS		Geochemistry of rock samples from the National Geochemical Database: U.S. Geological Survey, Reston, VA.	U.S. Geological Survey	USGS		36.125	-113.007	0.01	71	71	71	DNAA	SEDIMENTARY	UNKNOWN	UNKNOWN	DOLOMITE
D261652		USGS		Geochemistry of rock samples from the National Geochemical Database: U.S. Geological Survey, Reston, VA.	U.S. Geological Survey	USGS		36.125	-113.007	0.01	71	71	71	ICPAES	SEDIMENTARY	UNKNOWN	UNKNOWN	DOLOMITE																							0.94	400	18	6	14		220	20
D261652		USGS		Geochemistry of rock samples from the National Geochemical Database: U.S. Geological Survey, Reston, VA.	U.S. Geological Survey	USGS		36.125	-113.007	0.01	71	71	71	NAA	SEDIMENTARY	UNKNOWN	UNKNOWN	DOLOMITE																							0.918			4.01			183
D261652		USGS		Geochemistry of rock samples from the National Geochemical Database: U.S. Geological Survey, Reston, VA.	U.S. Geological Survey	USGS		36.125	-113.007	0.01	71	71	71	UNKNOWN	SEDIMENTARY	UNKNOWN	UNKNOWN	DOLOMITE
D261652		USGS		Geochemistry of rock samples from the National Geochemical Database: U.S. Geological Survey, Reston, VA.	U.S. Geological Survey	USGS		36.125	-113.007	0.01	71	71	71	XRF	SEDIMENTARY	UNKNOWN	UNKNOWN	DOLOMITE		54.6	0.25	4.02						0.04	7.74	11.7			1.5	0.18
D261657		USGS		Geochemistry of rock samples from the National Geochemical Database: U.S. Geological Survey, Reston, VA.	U.S. Geological Survey	USGS		36.125	-113.007	0.01	71	71	71	AAS	SEDIMENTARY	UNKNOWN	UNKNOWN	DOLOMITE
D261657		USGS		Geochemistry of rock samples from the National Geochemical Database: U.S. Geological Survey, Reston, VA.	U.S. Geological Survey	USGS		36.125	-113.007	0.01	71	71	71	DNAA	SEDIMENTARY	UNKNOWN	UNKNOWN	DOLOMITE
D261657		USGS		Geochemistry of rock samples from the National Geochemical Database: U.S. Geological Survey, Reston, VA.	U.S. Geological Survey	USGS		36.125	-113.007	0.01	71	71	71	ICPAES	SEDIMENTARY	UNKNOWN	UNKNOWN	DOLOMITE																							0.75	1000	8	4	8		130	70
D261657		USGS		Geochemistry of rock samples from the National Geochemical Database: U.S. Geological Survey, Reston, VA.	U.S. Geological Survey	USGS		36.125	-113.007	0.01	71	71	71	NAA	SEDIMENTARY	UNKNOWN	UNKNOWN	DOLOMITE																							0.773			2.6			175
D261657		USGS		Geochemistry of rock samples from the National Geochemical Database: U.S. Geological Survey, Reston, VA.	U.S. Geological Survey	USGS		36.125	-113.007	0.01	71	71	71	UNKNOWN	SEDIMENTARY	UNKNOWN	UNKNOWN	DOLOMITE
D261657		USGS		Geochemistry of rock samples from the National Geochemical Database: U.S. Geological Survey, Reston, VA.	U.S. Geological Survey	USGS		36.125	-113.007	0.01	71	71	71	XRF	SEDIMENTARY	UNKNOWN	UNKNOWN	DOLOMITE		15.4	0.03	0.75						0.13	16.8	26.4			0.26	0.18
D261658		USGS		Geochemistry of rock samples from the National Geochemical Database: U.S. Geological Survey, Reston, VA.	U.S. Geological Survey	USGS		36.125	-113.007	0.01	71	71	71	AAS	SEDIMENTARY	UNKNOWN	UNKNOWN	DOLOMITE
D261658		USGS		Geochemistry of rock samples from the National Geochemical Database: U.S. Geological Survey, Reston, VA.	U.S. Geological Survey	USGS		36.125	-113.007	0.01	71	71	71	DNAA	SEDIMENTARY	UNKNOWN	UNKNOWN	DOLOMITE
D261658		USGS		Geochemistry of rock samples from the National Geochemical Database: U.S. Geological Survey, Reston, VA.	U.S. Geological Survey	USGS		36.125	-113.007	0.01	71	71	71	ICPAES	SEDIMENTARY	UNKNOWN	UNKNOWN	DOLOMITE																							0.62	540	7	3	5	5	440	30
D261658		USGS		Geochemistry of rock samples from the National Geochemical Database: U.S. Geological Survey, Reston, VA.	U.S. Geological Survey	USGS		36.125	-113.007	0.01	71	71	71	NAA	SEDIMENTARY	UNKNOWN	UNKNOWN	DOLOMITE																							0.564			1.37			450
D261658		USGS		Geochemistry of rock samples from the National Geochemical Database: U.S. Geological Survey, Reston, VA.	U.S. Geological Survey	USGS		36.125	-113.007	0.01	71	71	71	UNKNOWN	SEDIMENTARY	UNKNOWN	UNKNOWN	DOLOMITE
D261658		USGS		Geochemistry of rock samples from the National Geochemical Database: U.S. Geological Survey, Reston, VA.	U.S. Geological Survey	USGS		36.125	-113.007	0.01	71	71	71	XRF	SEDIMENTARY	UNKNOWN	UNKNOWN	DOLOMITE		17.2		0.44						0.05	17	25.4			0.13	0.26
D264584		USGS		Geochemistry of rock samples from the National Geochemical Database: U.S. Geological Survey, Reston, VA.	U.S. Geological Survey	USGS		36.125	-113.007	0.01	71	71	71	DNAA	SEDIMENTARY	UNKNOWN	UNKNOWN	DOLOMITE
D264584		USGS		Geochemistry of rock samples from the National Geochemical Database: U.S. Geological Survey, Reston, VA.	U.S. Geological Survey	USGS		36.125	-113.007	0.01	71	71	71	ICPAES	SEDIMENTARY	UNKNOWN	UNKNOWN	DOLOMITE																							1.2	790	10	8	3		110	110
D264589		USGS		Geochemistry of rock samples from the National Geochemical Database: U.S. Geological Survey, Reston, VA.	U.S. Geological Survey	USGS		36.125	-113.007	0.01	71	71	71	DNAA	SEDIMENTARY	UNKNOWN	UNKNOWN	DOLOMITE
D264589		USGS		Geochemistry of rock samples from the National Geochemical Database: U.S. Geological Survey, Reston, VA.	U.S. Geological Survey	USGS		36.125	-113.007	0.01	71	71	71	ICPAES	SEDIMENTARY	UNKNOWN	UNKNOWN	DOLOMITE																							1.2	1700	10	9	6	9	360	170
D264592		USGS		Geochemistry of rock samples from the National Geochemical Database: U.S. Geological Survey, Reston, VA.	U.S. Geological Survey	USGS		36.125	-113.007	0.01	71	71	71	DNAA	SEDIMENTARY	UNKNOWN	UNKNOWN	DOLOMITE
D264592		USGS		Geochemistry of rock samples from the National Geochemical Database: U.S. Geological Survey, Reston, VA.	U.S. Geological Survey	USGS		36.125	-113.007	0.01	71	71	71	ICPAES	SEDIMENTARY	UNKNOWN	UNKNOWN	DOLOMITE																							0.84	670	14	5	11		57	50
D264596		USGS		Geochemistry of rock samples from the National Geochemical Database: U.S. Geological Survey, Reston, VA.	U.S. Geological Survey	USGS		36.125	-113.007	0.01	71	71	71	DNAA	SEDIMENTARY	UNKNOWN	UNKNOWN	DOLOMITE
D264596		USGS		Geochemistry of rock samples from the National Geochemical Database: U.S. Geological Survey, Reston, VA.	U.S. Geological Survey	USGS		36.125	-113.007	0.01	71	71	71	ICPAES	SEDIMENTARY	UNKNOWN	UNKNOWN	DOLOMITE																							0.76	1000	10	7	2		17	90
D264598		USGS		Geochemistry of rock samples from the National Geochemical Database: U.S. Geological Survey, Reston, VA.	U.S. Geological Survey	USGS		36.125	-113.007	0.01	71	71	71	DNAA	SEDIMENTARY	UNKNOWN	UNKNOWN	DOLOMITE
D264598		USGS		Geochemistry of rock samples from the National Geochemical Database: U.S. Geological Survey, Reston, VA.	U.S. Geological Survey	USGS		36.125	-113.007	0.01	71	71	71	ICPAES	SEDIMENTARY	UNKNOWN	UNKNOWN	DOLOMITE																							0.6	2100	7	2	6		140
D264600		USGS		Geochemistry of rock samples from the National Geochemical Database: U.S. Geological Survey, Reston, VA.	U.S. Geological Survey	USGS		36.125	-113.007	0.01	71	71	71	DNAA	SEDIMENTARY	UNKNOWN	UNKNOWN	DOLOMITE
D264600		USGS		Geochemistry of rock samples from the National Geochemical Database: U.S. Geological Survey, Reston, VA.	U.S. Geological Survey	USGS		36.125	-113.007	0.01	71	71	71	ICPAES	SEDIMENTARY	UNKNOWN	UNKNOWN	DOLOMITE																							0.79	620	14	4	10		51	40
D264625		USGS		Geochemistry of rock samples from the National Geochemical Database: U.S. Geological Survey, Reston, VA.	U.S. Geological Survey	USGS		36.125	-113.007	0.01	71	71	71	DNAA	SEDIMENTARY	UNKNOWN	UNKNOWN	DOLOMITE
D264625		USGS		Geochemistry of rock samples from the National Geochemical Database: U.S. Geological Survey, Reston, VA.	U.S. Geological Survey	USGS		36.125	-113.007	0.01	71	71	71	ICPAES	SEDIMENTARY	UNKNOWN	UNKNOWN	DOLOMITE																							0.28	470	17	14	200		82
D264626		USGS		Geochemistry of rock samples from the National Geochemical Database: U.S. Geological Survey, Reston, VA.	U.S. Geological Survey	USGS		36.125	-113.007	0.01	71	71	71	DNAA	SEDIMENTARY	UNKNOWN	UNKNOWN	DOLOMITE
D264626		USGS		Geochemistry of rock samples from the National Geochemical Database: U.S. Geological Survey, Reston, VA.	U.S. Geological Survey	USGS		36.125	-113.007	0.01	71	71	71	ICPAES	SEDIMENTARY	UNKNOWN	UNKNOWN	DOLOMITE																							0.31	1600	5	3	10		220
D264627		USGS		Geochemistry of rock samples from the National Geochemical Database: U.S. Geological Survey, Reston, VA.	U.S. Geological Survey	USGS		36.125	-113.007	0.01	71	71	71	DNAA	SEDIMENTARY	UNKNOWN	UNKNOWN	DOLOMITE
D264627		USGS		Geochemistry of rock samples from the National Geochemical Database: U.S. Geological Survey, Reston, VA.	U.S. Geological Survey	USGS		36.125	-113.007	0.01	71	71	71	ICPAES	SEDIMENTARY	UNKNOWN	UNKNOWN	DOLOMITE																							0.42	280	4	2	5		42
D264628		USGS		Geochemistry of rock samples from the National Geochemical Database: U.S. Geological Survey, Reston, VA.	U.S. Geological Survey	USGS		36.125	-113.007	0.01	71	71	71	DNAA	SEDIMENTARY	UNKNOWN	UNKNOWN	DOLOMITE
D264628		USGS		Geochemistry of rock samples from the National Geochemical Database: U.S. Geological Survey, Reston, VA.	U.S. Geological Survey	USGS		36.125	-113.007	0.01	71	71	71	ICPAES	SEDIMENTARY	UNKNOWN	UNKNOWN	DOLOMITE																							0.26	170	6	3	47		88
D264629		USGS		Geochemistry of rock samples from the National Geochemical Database: U.S. Geological Survey, Reston, VA.	U.S. Geological Survey	USGS		36.125	-113.007	0.01	71	71	71	DNAA	SEDIMENTARY	UNKNOWN	UNKNOWN	DOLOMITE
D264629		USGS		Geochemistry of rock samples from the National Geochemical Database: U.S. Geological Survey, Reston, VA.	U.S. Geological Survey	USGS		36.125	-113.007	0.01	71	71	71	ICPAES	SEDIMENTARY	UNKNOWN	UNKNOWN	DOLOMITE																							0.45	1400	4	3	2		270
D264630		USGS		Geochemistry of rock samples from the National Geochemical Database: U.S. Geological Survey, Reston, VA.	U.S. Geological Survey	USGS		36.125	-113.007	0.01	71	71	71	DNAA	SEDIMENTARY	UNKNOWN	UNKNOWN	DOLOMITE
D264630		USGS		Geochemistry of rock samples from the National Geochemical Database: U.S. Geological Survey, Reston, VA.	U.S. Geological Survey	USGS		36.125	-113.007	0.01	71	71	71	ICPAES	SEDIMENTARY	UNKNOWN	UNKNOWN	DOLOMITE																							0.62	1300	7	3	4		230
D264632		USGS		Geochemistry of rock samples from the National Geochemical Database: U.S. Geological Survey, Reston, VA.	U.S. Geological Survey	USGS		36.125	-113.007	0.01	71	71	71	DNAA	SEDIMENTARY	UNKNOWN	UNKNOWN	DOLOMITE
D264632		USGS		Geochemistry of rock samples from the National Geochemical Database: U.S. Geological Survey, Reston, VA.	U.S. Geological Survey	USGS		36.125	-113.007	0.01	71	71	71	ICPAES	SEDIMENTARY	UNKNOWN	UNKNOWN	DOLOMITE																							0.19	920	4	3	78		95
D264639		USGS		Geochemistry of rock samples from the National Geochemical Database: U.S. Geological Survey, Reston, VA.	U.S. Geological Survey	USGS		36.125	-113.007	0.01	71	71	71	DNAA	SEDIMENTARY	UNKNOWN	UNKNOWN	DOLOMITE
D264639		USGS		Geochemistry of rock samples from the National Geochemical Database: U.S. Geological Survey, Reston, VA.	U.S. Geological Survey	USGS		36.125	-113.007	0.01	71	71	71	ICPAES	SEDIMENTARY	UNKNOWN	UNKNOWN	DOLOMITE																							2	290	19	5	9		130	400
D264642		USGS		Geochemistry of rock samples from the National Geochemical Database: U.S. Geological Survey, Reston, VA.	U.S. Geological Survey	USGS		36.125	-113.007	0.01	71	71	71	DNAA	SEDIMENTARY	UNKNOWN	UNKNOWN	DOLOMITE
D264642		USGS		Geochemistry of rock samples from the National Geochemical Database: U.S. Geological Survey, Reston, VA.	U.S. Geological Survey	USGS		36.125	-113.007	0.01	71	71	71	ICPAES	SEDIMENTARY	UNKNOWN	UNKNOWN	DOLOMITE																							0.88	2400	9	4	31		160	10
D264643		USGS		Geochemistry of rock samples from the National Geochemical Database: U.S. Geological Survey, Reston, VA.	U.S. Geological Survey	USGS		36.125	-113.007	0.01	71	71	71	DNAA	SEDIMENTARY	UNKNOWN	UNKNOWN	DOLOMITE
D264643		USGS		Geochemistry of rock samples from the National Geochemical Database: U.S. Geological Survey, Reston, VA.	U.S. Geological Survey	USGS		36.125	-113.007	0.01	71	71	71	ICPAES	SEDIMENTARY	UNKNOWN	UNKNOWN	DOLOMITE																							0.59	650	9	2	2		410
D264645		USGS		Geochemistry of rock samples from the National Geochemical Database: U.S. Geological Survey, Reston, VA.	U.S. Geological Survey	USGS		36.125	-113.007	0.01	71	71	71	DNAA	SEDIMENTARY	UNKNOWN	UNKNOWN	DOLOMITE
D264645		USGS		Geochemistry of rock samples from the National Geochemical Database: U.S. Geological Survey, Reston, VA.	U.S. Geological Survey	USGS		36.125	-113.007	0.01	71	71	71	ICPAES	SEDIMENTARY	UNKNOWN	UNKNOWN	DOLOMITE																							3.3	1300	21	4	25	23	2500	40
D264646		USGS		Geochemistry of rock samples from the National Geochemical Database: U.S. Geological Survey, Reston, VA.	U.S. Geological Survey	USGS		36.125	-113.007	0.01	71	71	71	DNAA	SEDIMENTARY	UNKNOWN	UNKNOWN	DOLOMITE
D264646		USGS		Geochemistry of rock samples from the National Geochemical Database: U.S. Geological Survey, Reston, VA.	U.S. Geological Survey	USGS		36.125	-113.007	0.01	71	71	71	ICPAES	SEDIMENTARY	UNKNOWN	UNKNOWN	DOLOMITE																							0.29	1400	4	8	10	2	320
D264647		USGS		Geochemistry of rock samples from the National Geochemical Database: U.S. Geological Survey, Reston, VA.	U.S. Geological Survey	USGS		36.125	-113.007	0.01	71	71	71	DNAA	SEDIMENTARY	UNKNOWN	UNKNOWN	DOLOMITE
D264647		USGS		Geochemistry of rock samples from the National Geochemical Database: U.S. Geological Survey, Reston, VA.	U.S. Geological Survey	USGS		36.125	-113.007	0.01	71	71	71	ICPAES	SEDIMENTARY	UNKNOWN	UNKNOWN	DOLOMITE																							0.46	1700	8	2	12		150
D264648		USGS		Geochemistry of rock samples from the National Geochemical Database: U.S. Geological Survey, Reston, VA.	U.S. Geological Survey	USGS		36.125	-113.007	0.01	71	71	71	DNAA	SEDIMENTARY	UNKNOWN	UNKNOWN	DOLOMITE
D264648		USGS		Geochemistry of rock samples from the National Geochemical Database: U.S. Geological Survey, Reston, VA.	U.S. Geological Survey	USGS		36.125	-113.007	0.01	71	71	71	ICPAES	SEDIMENTARY	UNKNOWN	UNKNOWN	DOLOMITE																							0.34	210	3	2	42		140
D264649		USGS		Geochemistry of rock samples from the National Geochemical Database: U.S. Geological Survey, Reston, VA.	U.S. Geological Survey	USGS		36.125	-113.007	0.01	71	71	71	DNAA	SEDIMENTARY	UNKNOWN	UNKNOWN	DOLOMITE
D264649		USGS		Geochemistry of rock samples from the National Geochemical Database: U.S. Geological Survey, Reston, VA.	U.S. Geological Survey	USGS		36.125	-113.007	0.01	71	71	71	ICPAES	SEDIMENTARY	UNKNOWN	UNKNOWN	DOLOMITE																							0.4	820	4	3	7		63
D264658		USGS		Geochemistry of rock samples from the National Geochemical Database: U.S. Geological Survey, Reston, VA.	U.S. Geological Survey	USGS		36.125	-113.007	0.01	71	71	71	DNAA	SEDIMENTARY	UNKNOWN	UNKNOWN	DOLOMITE
D264658		USGS		Geochemistry of rock samples from the National Geochemical Database: U.S. Geological Survey, Reston, VA.	U.S. Geological Survey	USGS		36.125	-113.007	0.01	71	71	71	ICPAES	SEDIMENTARY	UNKNOWN	UNKNOWN	DOLOMITE																							0.14	450	5	4	65		73
D264661		USGS		Geochemistry of rock samples from the National Geochemical Database: U.S. Geological Survey, Reston, VA.	U.S. Geological Survey	USGS		36.125	-113.007	0.01	71	71	71	DNAA	SEDIMENTARY	UNKNOWN	UNKNOWN	DOLOMITE
D264661		USGS		Geochemistry of rock samples from the National Geochemical Database: U.S. Geological Survey, Reston, VA.	U.S. Geological Survey	USGS		36.125	-113.007	0.01	71	71	71	ICPAES	SEDIMENTARY	UNKNOWN	UNKNOWN	DOLOMITE																							0.15	95	5	2	3		30
D264662		USGS		Geochemistry of rock samples from the National Geochemical Database: U.S. Geological Survey, Reston, VA.	U.S. Geological Survey	USGS		36.125	-113.007	0.01	71	71	71	DNAA	SEDIMENTARY	UNKNOWN	UNKNOWN	DOLOMITE
D264662		USGS		Geochemistry of rock samples from the National Geochemical Database: U.S. Geological Survey, Reston, VA.	U.S. Geological Survey	USGS		36.125	-113.007	0.01	71	71	71	ICPAES	SEDIMENTARY	UNKNOWN	UNKNOWN	DOLOMITE																							0.47	280	11	3	5		250
D264664		USGS		Geochemistry of rock samples from the National Geochemical Database: U.S. Geological Survey, Reston, VA.	U.S. Geological Survey	USGS		36.125	-113.007	0.01	71	71	71	DNAA	SEDIMENTARY	UNKNOWN	UNKNOWN	DOLOMITE
D264664		USGS		Geochemistry of rock samples from the National Geochemical Database: U.S. Geological Survey, Reston, VA.	U.S. Geological Survey	USGS		36.125	-113.007	0.01	71	71	71	ICPAES	SEDIMENTARY	UNKNOWN	UNKNOWN	DOLOMITE																							0.19	130	5	2	10		20
D264666		USGS		Geochemistry of rock samples from the National Geochemical Database: U.S. Geological Survey, Reston, VA.	U.S. Geological Survey	USGS		36.0583	-112.084	0.01				AAS	SEDIMENTARY	UNKNOWN	UNKNOWN	DOLOMITE																														4.7
D264666		USGS		Geochemistry of rock samples from the National Geochemical Database: U.S. Geological Survey, Reston, VA.	U.S. Geological Survey	USGS		36.0583	-112.084	0.01				DNAA	SEDIMENTARY	UNKNOWN	UNKNOWN	DOLOMITE
D264666		USGS		Geochemistry of rock samples from the National Geochemical Database: U.S. Geological Survey, Reston, VA.	U.S. Geological Survey	USGS		36.0583	-112.084	0.01				ICPAES	SEDIMENTARY	UNKNOWN	UNKNOWN	DOLOMITE																							0.18	57	6	2	2		26
D264666		USGS		Geochemistry of rock samples from the National Geochemical Database: U.S. Geological Survey, Reston, VA.	U.S. Geological Survey	USGS		36.0583	-112.084	0.01				NAA	SEDIMENTARY	UNKNOWN	UNKNOWN	DOLOMITE																							0.173			0.559			43.4
D264666		USGS		Geochemistry of rock samples from the National Geochemical Database: U.S. Geological Survey, Reston, VA.	U.S. Geological Survey	USGS		36.0583	-112.084	0.01				UNKNOWN	SEDIMENTARY	UNKNOWN	UNKNOWN	DOLOMITE																															0.3
D264666		USGS		Geochemistry of rock samples from the National Geochemical Database: U.S. Geological Survey, Reston, VA.	U.S. Geological Survey	USGS		36.0583	-112.084	0.01				XRF	SEDIMENTARY	UNKNOWN	UNKNOWN	DOLOMITE		27.2	0.07	1.32							14.6	22.6			0.41	0.91
D264668		USGS		Geochemistry of rock samples from the National Geochemical Database: U.S. Geological Survey, Reston, VA.	U.S. Geological Survey	USGS		36.0811	-112.087	0.01				AAS	SEDIMENTARY	UNKNOWN	UNKNOWN	DOLOMITE																														0.3
D264668		USGS		Geochemistry of rock samples from the National Geochemical Database: U.S. Geological Survey, Reston, VA.	U.S. Geological Survey	USGS		36.0811	-112.087	0.01				DNAA	SEDIMENTARY	UNKNOWN	UNKNOWN	DOLOMITE
D264668		USGS		Geochemistry of rock samples from the National Geochemical Database: U.S. Geological Survey, Reston, VA.	U.S. Geological Survey	USGS		36.0811	-112.087	0.01				ICPAES	SEDIMENTARY	UNKNOWN	UNKNOWN	DOLOMITE																							0.07	360	9	4
D264668		USGS		Geochemistry of rock samples from the National Geochemical Database: U.S. Geological Survey, Reston, VA.	U.S. Geological Survey	USGS		36.0811	-112.087	0.01				NAA	SEDIMENTARY	UNKNOWN	UNKNOWN	DOLOMITE																							0.0644			2.53			15.2
D264668		USGS		Geochemistry of rock samples from the National Geochemical Database: U.S. Geological Survey, Reston, VA.	U.S. Geological Survey	USGS		36.0811	-112.087	0.01				UNKNOWN	SEDIMENTARY	UNKNOWN	UNKNOWN	DOLOMITE																															0.1
D264668		USGS		Geochemistry of rock samples from the National Geochemical Database: U.S. Geological Survey, Reston, VA.	U.S. Geological Survey	USGS		36.0811	-112.087	0.01				XRF	SEDIMENTARY	UNKNOWN	UNKNOWN	DOLOMITE		0.38								0.03	21.1	31.6
D264684		USGS		Geochemistry of rock samples from the National Geochemical Database: U.S. Geological Survey, Reston, VA.	U.S. Geological Survey	USGS		36.125	-113.007	0.01	71	71	71	AAS	SEDIMENTARY	UNKNOWN	UNKNOWN	DOLOMITE																														6
D264684		USGS		Geochemistry of rock samples from the National Geochemical Database: U.S. Geological Survey, Reston, VA.	U.S. Geological Survey	USGS		36.125	-113.007	0.01	71	71	71	DNAA	SEDIMENTARY	UNKNOWN	UNKNOWN	DOLOMITE
D264684		USGS		Geochemistry of rock samples from the National Geochemical Database: U.S. Geological Survey, Reston, VA.	U.S. Geological Survey	USGS		36.125	-113.007	0.01	71	71	71	ICPAES	SEDIMENTARY	UNKNOWN	UNKNOWN	DOLOMITE																							0.8	250	11	2	6		120
D264684		USGS		Geochemistry of rock samples from the National Geochemical Database: U.S. Geological Survey, Reston, VA.	U.S. Geological Survey	USGS		36.125	-113.007	0.01	71	71	71	NAA	SEDIMENTARY	UNKNOWN	UNKNOWN	DOLOMITE																							0.808			1.42			174
D264684		USGS		Geochemistry of rock samples from the National Geochemical Database: U.S. Geological Survey, Reston, VA.	U.S. Geological Survey	USGS		36.125	-113.007	0.01	71	71	71	UNKNOWN	SEDIMENTARY	UNKNOWN	UNKNOWN	DOLOMITE																															0.5
D264684		USGS		Geochemistry of rock samples from the National Geochemical Database: U.S. Geological Survey, Reston, VA.	U.S. Geological Survey	USGS		36.125	-113.007	0.01	71	71	71	XRF	SEDIMENTARY	UNKNOWN	UNKNOWN	DOLOMITE		27.3	0.36	7.78							12.9	18.6			2.43	0.23
D264690		USGS		Geochemistry of rock samples from the National Geochemical Database: U.S. Geological Survey, Reston, VA.	U.S. Geological Survey	USGS		36.125	-113.007	0.01	71	71	71	AAS	SEDIMENTARY	UNKNOWN	UNKNOWN	DOLOMITE																														46
D264690		USGS		Geochemistry of rock samples from the National Geochemical Database: U.S. Geological Survey, Reston, VA.	U.S. Geological Survey	USGS		36.125	-113.007	0.01	71	71	71	DNAA	SEDIMENTARY	UNKNOWN	UNKNOWN	DOLOMITE
D264690		USGS		Geochemistry of rock samples from the National Geochemical Database: U.S. Geological Survey, Reston, VA.	U.S. Geological Survey	USGS		36.125	-113.007	0.01	71	71	71	ICPAES	SEDIMENTARY	UNKNOWN	UNKNOWN	DOLOMITE																							1.3	2100	14	6	13	2	240	50
D264690		USGS		Geochemistry of rock samples from the National Geochemical Database: U.S. Geological Survey, Reston, VA.	U.S. Geological Survey	USGS		36.125	-113.007	0.01	71	71	71	NAA	SEDIMENTARY	UNKNOWN	UNKNOWN	DOLOMITE																							1.29			5.04			319
D264690		USGS		Geochemistry of rock samples from the National Geochemical Database: U.S. Geological Survey, Reston, VA.	U.S. Geological Survey	USGS		36.125	-113.007	0.01	71	71	71	UNKNOWN	SEDIMENTARY	UNKNOWN	UNKNOWN	DOLOMITE																															1.1
D264690		USGS		Geochemistry of rock samples from the National Geochemical Database: U.S. Geological Survey, Reston, VA.	U.S. Geological Survey	USGS		36.125	-113.007	0.01	71	71	71	XRF	SEDIMENTARY	UNKNOWN	UNKNOWN	DOLOMITE		10.7		0.17						0.28	18.1	27.8			0.07	0.19
D264691		USGS		Geochemistry of rock samples from the National Geochemical Database: U.S. Geological Survey, Reston, VA.	U.S. Geological Survey	USGS		36.125	-113.007	0.01	71	71	71	AAS	SEDIMENTARY	UNKNOWN	UNKNOWN	DOLOMITE																														86
D264691		USGS		Geochemistry of rock samples from the National Geochemical Database: U.S. Geological Survey, Reston, VA.	U.S. Geological Survey	USGS		36.125	-113.007	0.01	71	71	71	DNAA	SEDIMENTARY	UNKNOWN	UNKNOWN	DOLOMITE
D264691		USGS		Geochemistry of rock samples from the National Geochemical Database: U.S. Geological Survey, Reston, VA.	U.S. Geological Survey	USGS		36.125	-113.007	0.01	71	71	71	ICPAES	SEDIMENTARY	UNKNOWN	UNKNOWN	DOLOMITE																							3.8	500	16	7	41	4	590	90
D264691		USGS		Geochemistry of rock samples from the National Geochemical Database: U.S. Geological Survey, Reston, VA.	U.S. Geological Survey	USGS		36.125	-113.007	0.01	71	71	71	NAA	SEDIMENTARY	UNKNOWN	UNKNOWN	DOLOMITE																							3.74			1.46			753
D264691		USGS		Geochemistry of rock samples from the National Geochemical Database: U.S. Geological Survey, Reston, VA.	U.S. Geological Survey	USGS		36.125	-113.007	0.01	71	71	71	UNKNOWN	SEDIMENTARY	UNKNOWN	UNKNOWN	DOLOMITE																															1.2
D264691		USGS		Geochemistry of rock samples from the National Geochemical Database: U.S. Geological Survey, Reston, VA.	U.S. Geological Survey	USGS		36.125	-113.007	0.01	71	71	71	XRF	SEDIMENTARY	UNKNOWN	UNKNOWN	DOLOMITE		46.1		0.29						0.05	9.59	14.6			0.06	0.14
D264692		USGS		Geochemistry of rock samples from the National Geochemical Database: U.S. Geological Survey, Reston, VA.	U.S. Geological Survey	USGS		36.125	-113.007	0.01	71	71	71	AAS	SEDIMENTARY	UNKNOWN	UNKNOWN	DOLOMITE																														11
D264692		USGS		Geochemistry of rock samples from the National Geochemical Database: U.S. Geological Survey, Reston, VA.	U.S. Geological Survey	USGS		36.125	-113.007	0.01	71	71	71	DNAA	SEDIMENTARY	UNKNOWN	UNKNOWN	DOLOMITE
D264692		USGS		Geochemistry of rock samples from the National Geochemical Database: U.S. Geological Survey, Reston, VA.	U.S. Geological Survey	USGS		36.125	-113.007	0.01	71	71	71	ICPAES	SEDIMENTARY	UNKNOWN	UNKNOWN	DOLOMITE																							0.48	1700	5	2	12	7	180	10
D264692		USGS		Geochemistry of rock samples from the National Geochemical Database: U.S. Geological Survey, Reston, VA.	U.S. Geological Survey	USGS		36.125	-113.007	0.01	71	71	71	NAA	SEDIMENTARY	UNKNOWN	UNKNOWN	DOLOMITE																							0.47			0.629			223
D264692		USGS		Geochemistry of rock samples from the National Geochemical Database: U.S. Geological Survey, Reston, VA.	U.S. Geological Survey	USGS		36.125	-113.007	0.01	71	71	71	UNKNOWN	SEDIMENTARY	UNKNOWN	UNKNOWN	DOLOMITE																															1
D264692		USGS		Geochemistry of rock samples from the National Geochemical Database: U.S. Geological Survey, Reston, VA.	U.S. Geological Survey	USGS		36.125	-113.007	0.01	71	71	71	XRF	SEDIMENTARY	UNKNOWN	UNKNOWN	DOLOMITE		56.3		0.22						0.22	8.71	13.6			0.03	0.13
D264693		USGS		Geochemistry of rock samples from the National Geochemical Database: U.S. Geological Survey, Reston, VA.	U.S. Geological Survey	USGS		36.125	-113.007	0.01	71	71	71	AAS	SEDIMENTARY	UNKNOWN	UNKNOWN	DOLOMITE																														68
D264693		USGS		Geochemistry of rock samples from the National Geochemical Database: U.S. Geological Survey, Reston, VA.	U.S. Geological Survey	USGS		36.125	-113.007	0.01	71	71	71	DNAA	SEDIMENTARY	UNKNOWN	UNKNOWN	DOLOMITE
D264693		USGS		Geochemistry of rock samples from the National Geochemical Database: U.S. Geological Survey, Reston, VA.	U.S. Geological Survey	USGS		36.125	-113.007	0.01	71	71	71	ICPAES	SEDIMENTARY	UNKNOWN	UNKNOWN	DOLOMITE																							0.72	800	10	4	6	2	83	70
D264693		USGS		Geochemistry of rock samples from the National Geochemical Database: U.S. Geological Survey, Reston, VA.	U.S. Geological Survey	USGS		36.125	-113.007	0.01	71	71	71	NAA	SEDIMENTARY	UNKNOWN	UNKNOWN	DOLOMITE																							0.711			2.25			117
D264693		USGS		Geochemistry of rock samples from the National Geochemical Database: U.S. Geological Survey, Reston, VA.	U.S. Geological Survey	USGS		36.125	-113.007	0.01	71	71	71	UNKNOWN	SEDIMENTARY	UNKNOWN	UNKNOWN	DOLOMITE																															1.2
D264693		USGS		Geochemistry of rock samples from the National Geochemical Database: U.S. Geological Survey, Reston, VA.	U.S. Geological Survey	USGS		36.125	-113.007	0.01	71	71	71	XRF	SEDIMENTARY	UNKNOWN	UNKNOWN	DOLOMITE		23		0.71						0.1	15.7	23.5			0.05	0.18
D264694		USGS		Geochemistry of rock samples from the National Geochemical Database: U.S. Geological Survey, Reston, VA.	U.S. Geological Survey	USGS		36.125	-113.007	0.01	71	71	71	AAS	SEDIMENTARY	UNKNOWN	UNKNOWN	DOLOMITE																														31
D264694		USGS		Geochemistry of rock samples from the National Geochemical Database: U.S. Geological Survey, Reston, VA.	U.S. Geological Survey	USGS		36.125	-113.007	0.01	71	71	71	DNAA	SEDIMENTARY	UNKNOWN	UNKNOWN	DOLOMITE
D264694		USGS		Geochemistry of rock samples from the National Geochemical Database: U.S. Geological Survey, Reston, VA.	U.S. Geological Survey	USGS		36.125	-113.007	0.01	71	71	71	ICPAES	SEDIMENTARY	UNKNOWN	UNKNOWN	DOLOMITE																							1	900	16	5	8		230	30
D264694		USGS		Geochemistry of rock samples from the National Geochemical Database: U.S. Geological Survey, Reston, VA.	U.S. Geological Survey	USGS		36.125	-113.007	0.01	71	71	71	NAA	SEDIMENTARY	UNKNOWN	UNKNOWN	DOLOMITE																							0.949			3.35			279
D264694		USGS		Geochemistry of rock samples from the National Geochemical Database: U.S. Geological Survey, Reston, VA.	U.S. Geological Survey	USGS		36.125	-113.007	0.01	71	71	71	UNKNOWN	SEDIMENTARY	UNKNOWN	UNKNOWN	DOLOMITE
D264694		USGS		Geochemistry of rock samples from the National Geochemical Database: U.S. Geological Survey, Reston, VA.	U.S. Geological Survey	USGS		36.125	-113.007	0.01	71	71	71	XRF	SEDIMENTARY	UNKNOWN	UNKNOWN	DOLOMITE		45.2	0.14	2.46						0.11	10.4	15.7			0.72	0.19
D264695		USGS		Geochemistry of rock samples from the National Geochemical Database: U.S. Geological Survey, Reston, VA.	U.S. Geological Survey	USGS		36.125	-113.007	0.01	71	71	71	AAS	SEDIMENTARY	UNKNOWN	UNKNOWN	DOLOMITE																														4.7
D264695		USGS		Geochemistry of rock samples from the National Geochemical Database: U.S. Geological Survey, Reston, VA.	U.S. Geological Survey	USGS		36.125	-113.007	0.01	71	71	71	DNAA	SEDIMENTARY	UNKNOWN	UNKNOWN	DOLOMITE
D264695		USGS		Geochemistry of rock samples from the National Geochemical Database: U.S. Geological Survey, Reston, VA.	U.S. Geological Survey	USGS		36.125	-113.007	0.01	71	71	71	ICPAES	SEDIMENTARY	UNKNOWN	UNKNOWN	DOLOMITE																							0.61	1400	6	3	13		280
D264695		USGS		Geochemistry of rock samples from the National Geochemical Database: U.S. Geological Survey, Reston, VA.	U.S. Geological Survey	USGS		36.125	-113.007	0.01	71	71	71	NAA	SEDIMENTARY	UNKNOWN	UNKNOWN	DOLOMITE																							0.57			1.13			331
D264695		USGS		Geochemistry of rock samples from the National Geochemical Database: U.S. Geological Survey, Reston, VA.	U.S. Geological Survey	USGS		36.125	-113.007	0.01	71	71	71	UNKNOWN	SEDIMENTARY	UNKNOWN	UNKNOWN	DOLOMITE																															0.7
D264695		USGS		Geochemistry of rock samples from the National Geochemical Database: U.S. Geological Survey, Reston, VA.	U.S. Geological Survey	USGS		36.125	-113.007	0.01	71	71	71	XRF	SEDIMENTARY	UNKNOWN	UNKNOWN	DOLOMITE		21.6		0.54						0.17	16	24.7			0.19	0.29
D264696		USGS		Geochemistry of rock samples from the National Geochemical Database: U.S. Geological Survey, Reston, VA.	U.S. Geological Survey	USGS		36.125	-113.007	0.01	71	71	71	AAS	SEDIMENTARY	UNKNOWN	UNKNOWN	DOLOMITE																														5.1
D264696		USGS		Geochemistry of rock samples from the National Geochemical Database: U.S. Geological Survey, Reston, VA.	U.S. Geological Survey	USGS		36.125	-113.007	0.01	71	71	71	DNAA	SEDIMENTARY	UNKNOWN	UNKNOWN	DOLOMITE
D264696		USGS		Geochemistry of rock samples from the National Geochemical Database: U.S. Geological Survey, Reston, VA.	U.S. Geological Survey	USGS		36.125	-113.007	0.01	71	71	71	ICPAES	SEDIMENTARY	UNKNOWN	UNKNOWN	DOLOMITE																							0.46	1000	5	2	5		160
D264696		USGS		Geochemistry of rock samples from the National Geochemical Database: U.S. Geological Survey, Reston, VA.	U.S. Geological Survey	USGS		36.125	-113.007	0.01	71	71	71	NAA	SEDIMENTARY	UNKNOWN	UNKNOWN	DOLOMITE																							0.441			0.901			204
D264696		USGS		Geochemistry of rock samples from the National Geochemical Database: U.S. Geological Survey, Reston, VA.	U.S. Geological Survey	USGS		36.125	-113.007	0.01	71	71	71	UNKNOWN	SEDIMENTARY	UNKNOWN	UNKNOWN	DOLOMITE																															0.3
D264696		USGS		Geochemistry of rock samples from the National Geochemical Database: U.S. Geological Survey, Reston, VA.	U.S. Geological Survey	USGS		36.125	-113.007	0.01	71	71	71	XRF	SEDIMENTARY	UNKNOWN	UNKNOWN	DOLOMITE		32.8	0.1	1.38						0.13	13.6	20.4			0.48	0.12
D264697		USGS		Geochemistry of rock samples from the National Geochemical Database: U.S. Geological Survey, Reston, VA.	U.S. Geological Survey	USGS		36.125	-113.007	0.01	71	71	71	AAS	SEDIMENTARY	UNKNOWN	UNKNOWN	DOLOMITE																														15
D264697		USGS		Geochemistry of rock samples from the National Geochemical Database: U.S. Geological Survey, Reston, VA.	U.S. Geological Survey	USGS		36.125	-113.007	0.01	71	71	71	DNAA	SEDIMENTARY	UNKNOWN	UNKNOWN	DOLOMITE
D264697		USGS		Geochemistry of rock samples from the National Geochemical Database: U.S. Geological Survey, Reston, VA.	U.S. Geological Survey	USGS		36.125	-113.007	0.01	71	71	71	ICPAES	SEDIMENTARY	UNKNOWN	UNKNOWN	DOLOMITE																							0.37	990	8	3	4	2	49	10
D264697		USGS		Geochemistry of rock samples from the National Geochemical Database: U.S. Geological Survey, Reston, VA.	U.S. Geological Survey	USGS		36.125	-113.007	0.01	71	71	71	NAA	SEDIMENTARY	UNKNOWN	UNKNOWN	DOLOMITE																							0.354			1.34			71.1
D264697		USGS		Geochemistry of rock samples from the National Geochemical Database: U.S. Geological Survey, Reston, VA.	U.S. Geological Survey	USGS		36.125	-113.007	0.01	71	71	71	UNKNOWN	SEDIMENTARY	UNKNOWN	UNKNOWN	DOLOMITE																															1
D264697		USGS		Geochemistry of rock samples from the National Geochemical Database: U.S. Geological Survey, Reston, VA.	U.S. Geological Survey	USGS		36.125	-113.007	0.01	71	71	71	XRF	SEDIMENTARY	UNKNOWN	UNKNOWN	DOLOMITE		20		0.2						0.12	16.5	25.2			0.05	0.19
D264698		USGS		Geochemistry of rock samples from the National Geochemical Database: U.S. Geological Survey, Reston, VA.	U.S. Geological Survey	USGS		36.125	-113.007	0.01	71	71	71	AAS	SEDIMENTARY	UNKNOWN	UNKNOWN	DOLOMITE																														4.3
D264698		USGS		Geochemistry of rock samples from the National Geochemical Database: U.S. Geological Survey, Reston, VA.	U.S. Geological Survey	USGS		36.125	-113.007	0.01	71	71	71	DNAA	SEDIMENTARY	UNKNOWN	UNKNOWN	DOLOMITE
D264698		USGS		Geochemistry of rock samples from the National Geochemical Database: U.S. Geological Survey, Reston, VA.	U.S. Geological Survey	USGS		36.125	-113.007	0.01	71	71	71	ICPAES	SEDIMENTARY	UNKNOWN	UNKNOWN	DOLOMITE																							0.26	970	5	2	4		97
D264698		USGS		Geochemistry of rock samples from the National Geochemical Database: U.S. Geological Survey, Reston, VA.	U.S. Geological Survey	USGS		36.125	-113.007	0.01	71	71	71	NAA	SEDIMENTARY	UNKNOWN	UNKNOWN	DOLOMITE																							0.259			0.561			135
D264698		USGS		Geochemistry of rock samples from the National Geochemical Database: U.S. Geological Survey, Reston, VA.	U.S. Geological Survey	USGS		36.125	-113.007	0.01	71	71	71	UNKNOWN	SEDIMENTARY	UNKNOWN	UNKNOWN	DOLOMITE																															0.5
D264698		USGS		Geochemistry of rock samples from the National Geochemical Database: U.S. Geological Survey, Reston, VA.	U.S. Geological Survey	USGS		36.125	-113.007	0.01	71	71	71	XRF	SEDIMENTARY	UNKNOWN	UNKNOWN	DOLOMITE		7.09		0.56						0.12	19.3	29.2			0.15	0.19
D264700		USGS		Geochemistry of rock samples from the National Geochemical Database: U.S. Geological Survey, Reston, VA.	U.S. Geological Survey	USGS		36.125	-113.007	0.01	71	71	71	AAS	SEDIMENTARY	UNKNOWN	UNKNOWN	DOLOMITE																														8.4
D264700		USGS		Geochemistry of rock samples from the National Geochemical Database: U.S. Geological Survey, Reston, VA.	U.S. Geological Survey	USGS		36.125	-113.007	0.01	71	71	71	DNAA	SEDIMENTARY	UNKNOWN	UNKNOWN	DOLOMITE
D264700		USGS		Geochemistry of rock samples from the National Geochemical Database: U.S. Geological Survey, Reston, VA.	U.S. Geological Survey	USGS		36.125	-113.007	0.01	71	71	71	ICPAES	SEDIMENTARY	UNKNOWN	UNKNOWN	DOLOMITE																							0.65	3500	6	2	9		160
D264700		USGS		Geochemistry of rock samples from the National Geochemical Database: U.S. Geological Survey, Reston, VA.	U.S. Geological Survey	USGS		36.125	-113.007	0.01	71	71	71	NAA	SEDIMENTARY	UNKNOWN	UNKNOWN	DOLOMITE																							0.643			1			207
D264700		USGS		Geochemistry of rock samples from the National Geochemical Database: U.S. Geological Survey, Reston, VA.	U.S. Geological Survey	USGS		36.125	-113.007	0.01	71	71	71	UNKNOWN	SEDIMENTARY	UNKNOWN	UNKNOWN	DOLOMITE																															0.8
D264700		USGS		Geochemistry of rock samples from the National Geochemical Database: U.S. Geological Survey, Reston, VA.	U.S. Geological Survey	USGS		36.125	-113.007	0.01	71	71	71	XRF	SEDIMENTARY	UNKNOWN	UNKNOWN	DOLOMITE		1.07		0.19						0.48	20.5	31.2			0.06	0.18
D264702		USGS		Geochemistry of rock samples from the National Geochemical Database: U.S. Geological Survey, Reston, VA.	U.S. Geological Survey	USGS		36.125	-113.007	0.01	71	71	71	AAS	SEDIMENTARY	UNKNOWN	UNKNOWN	DOLOMITE																														3.8
D264702		USGS		Geochemistry of rock samples from the National Geochemical Database: U.S. Geological Survey, Reston, VA.	U.S. Geological Survey	USGS		36.125	-113.007	0.01	71	71	71	DNAA	SEDIMENTARY	UNKNOWN	UNKNOWN	DOLOMITE
D264703		USGS		Geochemistry of rock samples from the National Geochemical Database: U.S. Geological Survey, Reston, VA.	U.S. Geological Survey	USGS		36.125	-113.007	0.01	71	71	71	AAS	SEDIMENTARY	UNKNOWN	UNKNOWN	DOLOMITE																														18
D264702		USGS		Geochemistry of rock samples from the National Geochemical Database: U.S. Geological Survey, Reston, VA.	U.S. Geological Survey	USGS		36.125	-113.007	0.01	71	71	71	ICPAES	SEDIMENTARY	UNKNOWN	UNKNOWN	DOLOMITE																							0.32	670	7	3	67		250
D264702		USGS		Geochemistry of rock samples from the National Geochemical Database: U.S. Geological Survey, Reston, VA.	U.S. Geological Survey	USGS		36.125	-113.007	0.01	71	71	71	NAA	SEDIMENTARY	UNKNOWN	UNKNOWN	DOLOMITE																							0.318			1.03			303
D264702		USGS		Geochemistry of rock samples from the National Geochemical Database: U.S. Geological Survey, Reston, VA.	U.S. Geological Survey	USGS		36.125	-113.007	0.01	71	71	71	UNKNOWN	SEDIMENTARY	UNKNOWN	UNKNOWN	DOLOMITE																															0.8
D264702		USGS		Geochemistry of rock samples from the National Geochemical Database: U.S. Geological Survey, Reston, VA.	U.S. Geological Survey	USGS		36.125	-113.007	0.01	71	71	71	XRF	SEDIMENTARY	UNKNOWN	UNKNOWN	DOLOMITE		20.2		0.32						0.07	16.1	25.6			0.09	0.31
D264703		USGS		Geochemistry of rock samples from the National Geochemical Database: U.S. Geological Survey, Reston, VA.	U.S. Geological Survey	USGS		36.125	-113.007	0.01	71	71	71	DNAA	SEDIMENTARY	UNKNOWN	UNKNOWN	DOLOMITE
D264703		USGS		Geochemistry of rock samples from the National Geochemical Database: U.S. Geological Survey, Reston, VA.	U.S. Geological Survey	USGS		36.125	-113.007	0.01	71	71	71	ICPAES	SEDIMENTARY	UNKNOWN	UNKNOWN	DOLOMITE																							0.75	1200	14	5	6		150	20
D264703		USGS		Geochemistry of rock samples from the National Geochemical Database: U.S. Geological Survey, Reston, VA.	U.S. Geological Survey	USGS		36.125	-113.007	0.01	71	71	71	NAA	SEDIMENTARY	UNKNOWN	UNKNOWN	DOLOMITE																							0.708			3.04			187
D264703		USGS		Geochemistry of rock samples from the National Geochemical Database: U.S. Geological Survey, Reston, VA.	U.S. Geological Survey	USGS		36.125	-113.007	0.01	71	71	71	UNKNOWN	SEDIMENTARY	UNKNOWN	UNKNOWN	DOLOMITE
D264703		USGS		Geochemistry of rock samples from the National Geochemical Database: U.S. Geological Survey, Reston, VA.	U.S. Geological Survey	USGS		36.125	-113.007	0.01	71	71	71	XRF	SEDIMENTARY	UNKNOWN	UNKNOWN	DOLOMITE		29.9	0.12	2.22						0.16	13.7	20.7			0.72	0.25
D264705		USGS		Geochemistry of rock samples from the National Geochemical Database: U.S. Geological Survey, Reston, VA.	U.S. Geological Survey	USGS		36.125	-113.007	0.01	71	71	71	AAS	SEDIMENTARY	UNKNOWN	UNKNOWN	DOLOMITE																														81
D264705		USGS		Geochemistry of rock samples from the National Geochemical Database: U.S. Geological Survey, Reston, VA.	U.S. Geological Survey	USGS		36.125	-113.007	0.01	71	71	71	DNAA	SEDIMENTARY	UNKNOWN	UNKNOWN	DOLOMITE
D264705		USGS		Geochemistry of rock samples from the National Geochemical Database: U.S. Geological Survey, Reston, VA.	U.S. Geological Survey	USGS		36.125	-113.007	0.01	71	71	71	ICPAES	SEDIMENTARY	UNKNOWN	UNKNOWN	DOLOMITE																							4.5	1600	17	5	22		900	100
D264705		USGS		Geochemistry of rock samples from the National Geochemical Database: U.S. Geological Survey, Reston, VA.	U.S. Geological Survey	USGS		36.125	-113.007	0.01	71	71	71	NAA	SEDIMENTARY	UNKNOWN	UNKNOWN	DOLOMITE																							4.16			2.56			1040
D264705		USGS		Geochemistry of rock samples from the National Geochemical Database: U.S. Geological Survey, Reston, VA.	U.S. Geological Survey	USGS		36.125	-113.007	0.01	71	71	71	UNKNOWN	SEDIMENTARY	UNKNOWN	UNKNOWN	DOLOMITE																															1.3
D264705		USGS		Geochemistry of rock samples from the National Geochemical Database: U.S. Geological Survey, Reston, VA.	U.S. Geological Survey	USGS		36.125	-113.007	0.01	71	71	71	XRF	SEDIMENTARY	UNKNOWN	UNKNOWN	DOLOMITE		47.7		0.23						0.21	9.36	14.2			0.06	0.06
D264710		USGS		Geochemistry of rock samples from the National Geochemical Database: U.S. Geological Survey, Reston, VA.	U.S. Geological Survey	USGS		36.125	-113.007	0.01	71	71	71	AAS	SEDIMENTARY	UNKNOWN	UNKNOWN	DOLOMITE																														10
D264710		USGS		Geochemistry of rock samples from the National Geochemical Database: U.S. Geological Survey, Reston, VA.	U.S. Geological Survey	USGS		36.125	-113.007	0.01	71	71	71	DNAA	SEDIMENTARY	UNKNOWN	UNKNOWN	DOLOMITE
D264710		USGS		Geochemistry of rock samples from the National Geochemical Database: U.S. Geological Survey, Reston, VA.	U.S. Geological Survey	USGS		36.125	-113.007	0.01	71	71	71	ICPAES	SEDIMENTARY	UNKNOWN	UNKNOWN	DOLOMITE																							0.98	130	11	3	10		180
D264710		USGS		Geochemistry of rock samples from the National Geochemical Database: U.S. Geological Survey, Reston, VA.	U.S. Geological Survey	USGS		36.125	-113.007	0.01	71	71	71	NAA	SEDIMENTARY	UNKNOWN	UNKNOWN	DOLOMITE																							0.935			1.8			231
D264710		USGS		Geochemistry of rock samples from the National Geochemical Database: U.S. Geological Survey, Reston, VA.	U.S. Geological Survey	USGS		36.125	-113.007	0.01	71	71	71	UNKNOWN	SEDIMENTARY	UNKNOWN	UNKNOWN	DOLOMITE																															0.3
D264710		USGS		Geochemistry of rock samples from the National Geochemical Database: U.S. Geological Survey, Reston, VA.	U.S. Geological Survey	USGS		36.125	-113.007	0.01	71	71	71	XRF	SEDIMENTARY	UNKNOWN	UNKNOWN	DOLOMITE		56	0.26	5.26							6.94	10.8			1.61	0.79
D264713		USGS		Geochemistry of rock samples from the National Geochemical Database: U.S. Geological Survey, Reston, VA.	U.S. Geological Survey	USGS		36.125	-113.007	0.01	71	71	71	AAS	SEDIMENTARY	UNKNOWN	UNKNOWN	DOLOMITE																														5.3
D264713		USGS		Geochemistry of rock samples from the National Geochemical Database: U.S. Geological Survey, Reston, VA.	U.S. Geological Survey	USGS		36.125	-113.007	0.01	71	71	71	DNAA	SEDIMENTARY	UNKNOWN	UNKNOWN	DOLOMITE
D264713		USGS		Geochemistry of rock samples from the National Geochemical Database: U.S. Geological Survey, Reston, VA.	U.S. Geological Survey	USGS		36.125	-113.007	0.01	71	71	71	ICPAES	SEDIMENTARY	UNKNOWN	UNKNOWN	DOLOMITE																							0.34	520	8	8	140		110
D264713		USGS		Geochemistry of rock samples from the National Geochemical Database: U.S. Geological Survey, Reston, VA.	U.S. Geological Survey	USGS		36.125	-113.007	0.01	71	71	71	NAA	SEDIMENTARY	UNKNOWN	UNKNOWN	DOLOMITE																							0.353			4.3			159
D264713		USGS		Geochemistry of rock samples from the National Geochemical Database: U.S. Geological Survey, Reston, VA.	U.S. Geological Survey	USGS		36.125	-113.007	0.01	71	71	71	UNKNOWN	SEDIMENTARY	UNKNOWN	UNKNOWN	DOLOMITE																															1.1
D264713		USGS		Geochemistry of rock samples from the National Geochemical Database: U.S. Geological Survey, Reston, VA.	U.S. Geological Survey	USGS		36.125	-113.007	0.01	71	71	71	XRF	SEDIMENTARY	UNKNOWN	UNKNOWN	DOLOMITE		5.7	0.04	1.06						0.05	19.3	28.9			0.34	0.11
D264715		USGS		Geochemistry of rock samples from the National Geochemical Database: U.S. Geological Survey, Reston, VA.	U.S. Geological Survey	USGS		36.125	-113.007	0.01	71	71	71	AAS	SEDIMENTARY	UNKNOWN	UNKNOWN	DOLOMITE																														14
D264715		USGS		Geochemistry of rock samples from the National Geochemical Database: U.S. Geological Survey, Reston, VA.	U.S. Geological Survey	USGS		36.125	-113.007	0.01	71	71	71	DNAA	SEDIMENTARY	UNKNOWN	UNKNOWN	DOLOMITE
D264715		USGS		Geochemistry of rock samples from the National Geochemical Database: U.S. Geological Survey, Reston, VA.	U.S. Geological Survey	USGS		36.125	-113.007	0.01	71	71	71	ICPAES	SEDIMENTARY	UNKNOWN	UNKNOWN	DOLOMITE																							0.24	52	4	4	230	8	190	10
D264715		USGS		Geochemistry of rock samples from the National Geochemical Database: U.S. Geological Survey, Reston, VA.	U.S. Geological Survey	USGS		36.125	-113.007	0.01	71	71	71	NAA	SEDIMENTARY	UNKNOWN	UNKNOWN	DOLOMITE																							0.227			1.18			224
D264715		USGS		Geochemistry of rock samples from the National Geochemical Database: U.S. Geological Survey, Reston, VA.	U.S. Geological Survey	USGS		36.125	-113.007	0.01	71	71	71	UNKNOWN	SEDIMENTARY	UNKNOWN	UNKNOWN	DOLOMITE																															1.3
D264715		USGS		Geochemistry of rock samples from the National Geochemical Database: U.S. Geological Survey, Reston, VA.	U.S. Geological Survey	USGS		36.125	-113.007	0.01	71	71	71	XRF	SEDIMENTARY	UNKNOWN	UNKNOWN	DOLOMITE		78.8	0.03	0.77							0.99	7.99			0.17	0.24
D264718		USGS		Geochemistry of rock samples from the National Geochemical Database: U.S. Geological Survey, Reston, VA.	U.S. Geological Survey	USGS		36.125	-113.007	0.01	71	71	71	AAS	SEDIMENTARY	UNKNOWN	UNKNOWN	DOLOMITE																														44
D264718		USGS		Geochemistry of rock samples from the National Geochemical Database: U.S. Geological Survey, Reston, VA.	U.S. Geological Survey	USGS		36.125	-113.007	0.01	71	71	71	DNAA	SEDIMENTARY	UNKNOWN	UNKNOWN	DOLOMITE
D264718		USGS		Geochemistry of rock samples from the National Geochemical Database: U.S. Geological Survey, Reston, VA.	U.S. Geological Survey	USGS		36.125	-113.007	0.01	71	71	71	ICPAES	SEDIMENTARY	UNKNOWN	UNKNOWN	DOLOMITE																							0.8	710	10	4	5		150	50
D264718		USGS		Geochemistry of rock samples from the National Geochemical Database: U.S. Geological Survey, Reston, VA.	U.S. Geological Survey	USGS		36.125	-113.007	0.01	71	71	71	NAA	SEDIMENTARY	UNKNOWN	UNKNOWN	DOLOMITE																							0.751			2.03			193
D264718		USGS		Geochemistry of rock samples from the National Geochemical Database: U.S. Geological Survey, Reston, VA.	U.S. Geological Survey	USGS		36.125	-113.007	0.01	71	71	71	UNKNOWN	SEDIMENTARY	UNKNOWN	UNKNOWN	DOLOMITE																															0.7
D264718		USGS		Geochemistry of rock samples from the National Geochemical Database: U.S. Geological Survey, Reston, VA.	U.S. Geological Survey	USGS		36.125	-113.007	0.01	71	71	71	XRF	SEDIMENTARY	UNKNOWN	UNKNOWN	DOLOMITE		52.3	0.06	1.24						0.08	9.35	14.2			0.36	0.2
D264720		USGS		Geochemistry of rock samples from the National Geochemical Database: U.S. Geological Survey, Reston, VA.	U.S. Geological Survey	USGS		36.125	-113.007	0.01	71	71	71	AAS	SEDIMENTARY	UNKNOWN	UNKNOWN	DOLOMITE																														140
D264720		USGS		Geochemistry of rock samples from the National Geochemical Database: U.S. Geological Survey, Reston, VA.	U.S. Geological Survey	USGS		36.125	-113.007	0.01	71	71	71	DNAA	SEDIMENTARY	UNKNOWN	UNKNOWN	DOLOMITE
D264720		USGS		Geochemistry of rock samples from the National Geochemical Database: U.S. Geological Survey, Reston, VA.	U.S. Geological Survey	USGS		36.125	-113.007	0.01	71	71	71	ICPAES	SEDIMENTARY	UNKNOWN	UNKNOWN	DOLOMITE																							1.3	810	16	7	4	6	150	170
D264720		USGS		Geochemistry of rock samples from the National Geochemical Database: U.S. Geological Survey, Reston, VA.	U.S. Geological Survey	USGS		36.125	-113.007	0.01	71	71	71	NAA	SEDIMENTARY	UNKNOWN	UNKNOWN	DOLOMITE																							1.31			5.42			200
D264720		USGS		Geochemistry of rock samples from the National Geochemical Database: U.S. Geological Survey, Reston, VA.	U.S. Geological Survey	USGS		36.125	-113.007	0.01	71	71	71	UNKNOWN	SEDIMENTARY	UNKNOWN	UNKNOWN	DOLOMITE																															0.5
D264720		USGS		Geochemistry of rock samples from the National Geochemical Database: U.S. Geological Survey, Reston, VA.	U.S. Geological Survey	USGS		36.125	-113.007	0.01	71	71	71	XRF	SEDIMENTARY	UNKNOWN	UNKNOWN	DOLOMITE		4.95		0.19						0.1	19.9	29.4			0.09	0.2
D264722		USGS		Geochemistry of rock samples from the National Geochemical Database: U.S. Geological Survey, Reston, VA.	U.S. Geological Survey	USGS		36.125	-113.007	0.01	71	71	71	AAS	SEDIMENTARY	UNKNOWN	UNKNOWN	DOLOMITE																														5.9
D264722		USGS		Geochemistry of rock samples from the National Geochemical Database: U.S. Geological Survey, Reston, VA.	U.S. Geological Survey	USGS		36.125	-113.007	0.01	71	71	71	DNAA	SEDIMENTARY	UNKNOWN	UNKNOWN	DOLOMITE
D264722		USGS		Geochemistry of rock samples from the National Geochemical Database: U.S. Geological Survey, Reston, VA.	U.S. Geological Survey	USGS		36.125	-113.007	0.01	71	71	71	ICPAES	SEDIMENTARY	UNKNOWN	UNKNOWN	DOLOMITE																							0.53	1600	7	2	2		65
D264722		USGS		Geochemistry of rock samples from the National Geochemical Database: U.S. Geological Survey, Reston, VA.	U.S. Geological Survey	USGS		36.125	-113.007	0.01	71	71	71	NAA	SEDIMENTARY	UNKNOWN	UNKNOWN	DOLOMITE																							0.545			1.05			90.7
D264722		USGS		Geochemistry of rock samples from the National Geochemical Database: U.S. Geological Survey, Reston, VA.	U.S. Geological Survey	USGS		36.125	-113.007	0.01	71	71	71	UNKNOWN	SEDIMENTARY	UNKNOWN	UNKNOWN	DOLOMITE																															0.3
D264722		USGS		Geochemistry of rock samples from the National Geochemical Database: U.S. Geological Survey, Reston, VA.	U.S. Geological Survey	USGS		36.125	-113.007	0.01	71	71	71	XRF	SEDIMENTARY	UNKNOWN	UNKNOWN	DOLOMITE		29.2	0.07	1.35						0.22	14.2	21.7			0.46	0.24
D264723		USGS		Geochemistry of rock samples from the National Geochemical Database: U.S. Geological Survey, Reston, VA.	U.S. Geological Survey	USGS		36.125	-113.007	0.01	71	71	71	AAS	SEDIMENTARY	UNKNOWN	UNKNOWN	DOLOMITE																														55
D264723		USGS		Geochemistry of rock samples from the National Geochemical Database: U.S. Geological Survey, Reston, VA.	U.S. Geological Survey	USGS		36.125	-113.007	0.01	71	71	71	DNAA	SEDIMENTARY	UNKNOWN	UNKNOWN	DOLOMITE
D264723		USGS		Geochemistry of rock samples from the National Geochemical Database: U.S. Geological Survey, Reston, VA.	U.S. Geological Survey	USGS		36.125	-113.007	0.01	71	71	71	ICPAES	SEDIMENTARY	UNKNOWN	UNKNOWN	DOLOMITE																							1.2	1300	10	5	4	10	420	50
D264723		USGS		Geochemistry of rock samples from the National Geochemical Database: U.S. Geological Survey, Reston, VA.	U.S. Geological Survey	USGS		36.125	-113.007	0.01	71	71	71	NAA	SEDIMENTARY	UNKNOWN	UNKNOWN	DOLOMITE																							1.11			3.22			463
D264723		USGS		Geochemistry of rock samples from the National Geochemical Database: U.S. Geological Survey, Reston, VA.	U.S. Geological Survey	USGS		36.125	-113.007	0.01	71	71	71	UNKNOWN	SEDIMENTARY	UNKNOWN	UNKNOWN	DOLOMITE																															0.6
D264723		USGS		Geochemistry of rock samples from the National Geochemical Database: U.S. Geological Survey, Reston, VA.	U.S. Geological Survey	USGS		36.125	-113.007	0.01	71	71	71	XRF	SEDIMENTARY	UNKNOWN	UNKNOWN	DOLOMITE		1.43		0.13						0.17	19.6	32			0.05	0.1
D264724		USGS		Geochemistry of rock samples from the National Geochemical Database: U.S. Geological Survey, Reston, VA.	U.S. Geological Survey	USGS		36.125	-113.007	0.01	71	71	71	AAS	SEDIMENTARY	UNKNOWN	UNKNOWN	DOLOMITE																														27
D264724		USGS		Geochemistry of rock samples from the National Geochemical Database: U.S. Geological Survey, Reston, VA.	U.S. Geological Survey	USGS		36.125	-113.007	0.01	71	71	71	DNAA	SEDIMENTARY	UNKNOWN	UNKNOWN	DOLOMITE
D264724		USGS		Geochemistry of rock samples from the National Geochemical Database: U.S. Geological Survey, Reston, VA.	U.S. Geological Survey	USGS		36.125	-113.007	0.01	71	71	71	ICPAES	SEDIMENTARY	UNKNOWN	UNKNOWN	DOLOMITE																							0.38	530	11	3	3		220	20
D264724		USGS		Geochemistry of rock samples from the National Geochemical Database: U.S. Geological Survey, Reston, VA.	U.S. Geological Survey	USGS		36.125	-113.007	0.01	71	71	71	NAA	SEDIMENTARY	UNKNOWN	UNKNOWN	DOLOMITE																							0.386			1.4			258
D264724		USGS		Geochemistry of rock samples from the National Geochemical Database: U.S. Geological Survey, Reston, VA.	U.S. Geological Survey	USGS		36.125	-113.007	0.01	71	71	71	UNKNOWN	SEDIMENTARY	UNKNOWN	UNKNOWN	DOLOMITE																															0.3
D264724		USGS		Geochemistry of rock samples from the National Geochemical Database: U.S. Geological Survey, Reston, VA.	U.S. Geological Survey	USGS		36.125	-113.007	0.01	71	71	71	XRF	SEDIMENTARY	UNKNOWN	UNKNOWN	DOLOMITE		2.12		0.45						0.06	20.6	30.9			0.12
D264736		USGS		Geochemistry of rock samples from the National Geochemical Database: U.S. Geological Survey, Reston, VA.	U.S. Geological Survey	USGS		36.125	-113.007	0.01	71	71	71	AAS	SEDIMENTARY	UNKNOWN	UNKNOWN	DOLOMITE																														120
D264736		USGS		Geochemistry of rock samples from the National Geochemical Database: U.S. Geological Survey, Reston, VA.	U.S. Geological Survey	USGS		36.125	-113.007	0.01	71	71	71	DNAA	SEDIMENTARY	UNKNOWN	UNKNOWN	DOLOMITE
D264736		USGS		Geochemistry of rock samples from the National Geochemical Database: U.S. Geological Survey, Reston, VA.	U.S. Geological Survey	USGS		36.125	-113.007	0.01	71	71	71	ICPAES	SEDIMENTARY	UNKNOWN	UNKNOWN	DOLOMITE																							1.1	540	12	8	8		10	150
D264736		USGS		Geochemistry of rock samples from the National Geochemical Database: U.S. Geological Survey, Reston, VA.	U.S. Geological Survey	USGS		36.125	-113.007	0.01	71	71	71	NAA	SEDIMENTARY	UNKNOWN	UNKNOWN	DOLOMITE																							1.06			4.69			23.7
D264736		USGS		Geochemistry of rock samples from the National Geochemical Database: U.S. Geological Survey, Reston, VA.	U.S. Geological Survey	USGS		36.125	-113.007	0.01	71	71	71	UNKNOWN	SEDIMENTARY	UNKNOWN	UNKNOWN	DOLOMITE																															0.7
D264736		USGS		Geochemistry of rock samples from the National Geochemical Database: U.S. Geological Survey, Reston, VA.	U.S. Geological Survey	USGS		36.125	-113.007	0.01	71	71	71	XRF	SEDIMENTARY	UNKNOWN	UNKNOWN	DOLOMITE		22	0.05	0.75						0.06	15.1	24.7			0.28	1.75
D264739		USGS		Geochemistry of rock samples from the National Geochemical Database: U.S. Geological Survey, Reston, VA.	U.S. Geological Survey	USGS		36.125	-113.007	0.01	71	71	71	AAS	SEDIMENTARY	UNKNOWN	UNKNOWN	DOLOMITE																														26
D264739		USGS		Geochemistry of rock samples from the National Geochemical Database: U.S. Geological Survey, Reston, VA.	U.S. Geological Survey	USGS		36.125	-113.007	0.01	71	71	71	DNAA	SEDIMENTARY	UNKNOWN	UNKNOWN	DOLOMITE
D264739		USGS		Geochemistry of rock samples from the National Geochemical Database: U.S. Geological Survey, Reston, VA.	U.S. Geological Survey	USGS		36.125	-113.007	0.01	71	71	71	ICPAES	SEDIMENTARY	UNKNOWN	UNKNOWN	DOLOMITE																							0.53	780	7	5			100	20
D264739		USGS		Geochemistry of rock samples from the National Geochemical Database: U.S. Geological Survey, Reston, VA.	U.S. Geological Survey	USGS		36.125	-113.007	0.01	71	71	71	NAA	SEDIMENTARY	UNKNOWN	UNKNOWN	DOLOMITE																							0.538			3.01			121
D264739		USGS		Geochemistry of rock samples from the National Geochemical Database: U.S. Geological Survey, Reston, VA.	U.S. Geological Survey	USGS		36.125	-113.007	0.01	71	71	71	UNKNOWN	SEDIMENTARY	UNKNOWN	UNKNOWN	DOLOMITE																															0.7
D264739		USGS		Geochemistry of rock samples from the National Geochemical Database: U.S. Geological Survey, Reston, VA.	U.S. Geological Survey	USGS		36.125	-113.007	0.01	71	71	71	XRF	SEDIMENTARY	UNKNOWN	UNKNOWN	DOLOMITE		1.33		0.22						0.09	20.3	31.5			0.04	0.08
D264743		USGS		Geochemistry of rock samples from the National Geochemical Database: U.S. Geological Survey, Reston, VA.	U.S. Geological Survey	USGS		36.125	-113.007	0.01	71	71	71	AAS	SEDIMENTARY	UNKNOWN	UNKNOWN	DOLOMITE																														7.2
D264743		USGS		Geochemistry of rock samples from the National Geochemical Database: U.S. Geological Survey, Reston, VA.	U.S. Geological Survey	USGS		36.125	-113.007	0.01	71	71	71	DNAA	SEDIMENTARY	UNKNOWN	UNKNOWN	DOLOMITE
D264743		USGS		Geochemistry of rock samples from the National Geochemical Database: U.S. Geological Survey, Reston, VA.	U.S. Geological Survey	USGS		36.125	-113.007	0.01	71	71	71	ICPAES	SEDIMENTARY	UNKNOWN	UNKNOWN	DOLOMITE																							0.58	1800	9	3	2		73
D264743		USGS		Geochemistry of rock samples from the National Geochemical Database: U.S. Geological Survey, Reston, VA.	U.S. Geological Survey	USGS		36.125	-113.007	0.01	71	71	71	NAA	SEDIMENTARY	UNKNOWN	UNKNOWN	DOLOMITE																							0.568			1.25			93.7
D264743		USGS		Geochemistry of rock samples from the National Geochemical Database: U.S. Geological Survey, Reston, VA.	U.S. Geological Survey	USGS		36.125	-113.007	0.01	71	71	71	UNKNOWN	SEDIMENTARY	UNKNOWN	UNKNOWN	DOLOMITE																															0.3
D264743		USGS		Geochemistry of rock samples from the National Geochemical Database: U.S. Geological Survey, Reston, VA.	U.S. Geological Survey	USGS		36.125	-113.007	0.01	71	71	71	XRF	SEDIMENTARY	UNKNOWN	UNKNOWN	DOLOMITE		21.2	0.05	1.14						0.24	15.9	24.2			0.32	0.24
D265909		USGS		Geochemistry of rock samples from the National Geochemical Database: U.S. Geological Survey, Reston, VA.	U.S. Geological Survey	USGS		36.6083	-112.7	0.01	71	71	71	AAS	SEDIMENTARY	UNKNOWN	UNKNOWN	DOLOMITE
D265909		USGS		Geochemistry of rock samples from the National Geochemical Database: U.S. Geological Survey, Reston, VA.	U.S. Geological Survey	USGS		36.6083	-112.7	0.01	71	71	71	DNAA	SEDIMENTARY	UNKNOWN	UNKNOWN	DOLOMITE
D265910		USGS		Geochemistry of rock samples from the National Geochemical Database: U.S. Geological Survey, Reston, VA.	U.S. Geological Survey	USGS		36.6083	-112.7	0.01	71	71	71	AAS	SEDIMENTARY	UNKNOWN	UNKNOWN	DOLOMITE
D265909		USGS		Geochemistry of rock samples from the National Geochemical Database: U.S. Geological Survey, Reston, VA.	U.S. Geological Survey	USGS		36.6083	-112.7	0.01	71	71	71	ICPAES	SEDIMENTARY	UNKNOWN	UNKNOWN	DOLOMITE																							0.15	110	4	2	10		11	30
D265909		USGS		Geochemistry of rock samples from the National Geochemical Database: U.S. Geological Survey, Reston, VA.	U.S. Geological Survey	USGS		36.6083	-112.7	0.01	71	71	71	NAA	SEDIMENTARY	UNKNOWN	UNKNOWN	DOLOMITE																							0.146			0.596			19.8
D265909		USGS		Geochemistry of rock samples from the National Geochemical Database: U.S. Geological Survey, Reston, VA.	U.S. Geological Survey	USGS		36.6083	-112.7	0.01	71	71	71	UNKNOWN	SEDIMENTARY	UNKNOWN	UNKNOWN	DOLOMITE
D265909		USGS		Geochemistry of rock samples from the National Geochemical Database: U.S. Geological Survey, Reston, VA.	U.S. Geological Survey	USGS		36.6083	-112.7	0.01	71	71	71	XRF	SEDIMENTARY	UNKNOWN	UNKNOWN	DOLOMITE		70.3		0.49							4.2	11.2		0.19	0.15	0.47
D265910		USGS		Geochemistry of rock samples from the National Geochemical Database: U.S. Geological Survey, Reston, VA.	U.S. Geological Survey	USGS		36.6083	-112.7	0.01	71	71	71	DNAA	SEDIMENTARY	UNKNOWN	UNKNOWN	DOLOMITE
D265910		USGS		Geochemistry of rock samples from the National Geochemical Database: U.S. Geological Survey, Reston, VA.	U.S. Geological Survey	USGS		36.6083	-112.7	0.01	71	71	71	ICPAES	SEDIMENTARY	UNKNOWN	UNKNOWN	DOLOMITE																							0.16	110	4	2	7		17	30
D265910		USGS		Geochemistry of rock samples from the National Geochemical Database: U.S. Geological Survey, Reston, VA.	U.S. Geological Survey	USGS		36.6083	-112.7	0.01	71	71	71	NAA	SEDIMENTARY	UNKNOWN	UNKNOWN	DOLOMITE																							0.163			0.7			18.8
D265910		USGS		Geochemistry of rock samples from the National Geochemical Database: U.S. Geological Survey, Reston, VA.	U.S. Geological Survey	USGS		36.6083	-112.7	0.01	71	71	71	UNKNOWN	SEDIMENTARY	UNKNOWN	UNKNOWN	DOLOMITE
D265910		USGS		Geochemistry of rock samples from the National Geochemical Database: U.S. Geological Survey, Reston, VA.	U.S. Geological Survey	USGS		36.6083	-112.7	0.01	71	71	71	XRF	SEDIMENTARY	UNKNOWN	UNKNOWN	DOLOMITE		70.2	0.04	0.45							4.16	11.2			0.16	0.47
D265941		USGS		Geochemistry of rock samples from the National Geochemical Database: U.S. Geological Survey, Reston, VA.	U.S. Geological Survey	USGS		36.2597	-113.802	0.01	71	71	71	AAS	SEDIMENTARY	UNKNOWN	UNKNOWN	DOLOMITE
D265941		USGS		Geochemistry of rock samples from the National Geochemical Database: U.S. Geological Survey, Reston, VA.	U.S. Geological Survey	USGS		36.2597	-113.802	0.01	71	71	71	DNAA	SEDIMENTARY	UNKNOWN	UNKNOWN	DOLOMITE
D265941		USGS		Geochemistry of rock samples from the National Geochemical Database: U.S. Geological Survey, Reston, VA.	U.S. Geological Survey	USGS		36.2597	-113.802	0.01	71	71	71	ICPAES	SEDIMENTARY	UNKNOWN	UNKNOWN	DOLOMITE																							0.22	190	3	2	7		59
D265941		USGS		Geochemistry of rock samples from the National Geochemical Database: U.S. Geological Survey, Reston, VA.	U.S. Geological Survey	USGS		36.2597	-113.802	0.01	71	71	71	NAA	SEDIMENTARY	UNKNOWN	UNKNOWN	DOLOMITE																							0.238			0.601			125
D265941		USGS		Geochemistry of rock samples from the National Geochemical Database: U.S. Geological Survey, Reston, VA.	U.S. Geological Survey	USGS		36.2597	-113.802	0.01	71	71	71	UNKNOWN	SEDIMENTARY	UNKNOWN	UNKNOWN	DOLOMITE
D265941		USGS		Geochemistry of rock samples from the National Geochemical Database: U.S. Geological Survey, Reston, VA.	U.S. Geological Survey	USGS		36.2597	-113.802	0.01	71	71	71	XRF	SEDIMENTARY	UNKNOWN	UNKNOWN	DOLOMITE		22.4	0.03	0.94							16.1	24.2			0.28	0.13
D265946		USGS		Geochemistry of rock samples from the National Geochemical Database: U.S. Geological Survey, Reston, VA.	U.S. Geological Survey	USGS		36.2597	-113.802	0.01	71	71	71	AAS	SEDIMENTARY	UNKNOWN	UNKNOWN	DOLOMITE
D265946		USGS		Geochemistry of rock samples from the National Geochemical Database: U.S. Geological Survey, Reston, VA.	U.S. Geological Survey	USGS		36.2597	-113.802	0.01	71	71	71	DNAA	SEDIMENTARY	UNKNOWN	UNKNOWN	DOLOMITE
D265946		USGS		Geochemistry of rock samples from the National Geochemical Database: U.S. Geological Survey, Reston, VA.	U.S. Geological Survey	USGS		36.2597	-113.802	0.01	71	71	71	ICPAES	SEDIMENTARY	UNKNOWN	UNKNOWN	DOLOMITE																							0.59	200	37	22	340	2	69	160
D265946		USGS		Geochemistry of rock samples from the National Geochemical Database: U.S. Geological Survey, Reston, VA.	U.S. Geological Survey	USGS		36.2597	-113.802	0.01	71	71	71	NAA	SEDIMENTARY	UNKNOWN	UNKNOWN	DOLOMITE																							0.614			19.9			146
D265946		USGS		Geochemistry of rock samples from the National Geochemical Database: U.S. Geological Survey, Reston, VA.	U.S. Geological Survey	USGS		36.2597	-113.802	0.01	71	71	71	UNKNOWN	SEDIMENTARY	UNKNOWN	UNKNOWN	DOLOMITE
D265946		USGS		Geochemistry of rock samples from the National Geochemical Database: U.S. Geological Survey, Reston, VA.	U.S. Geological Survey	USGS		36.2597	-113.802	0.01	71	71	71	XRF	SEDIMENTARY	UNKNOWN	UNKNOWN	DOLOMITE		25.3	0.02	1.06							15	23			0.26
D265951		USGS		Geochemistry of rock samples from the National Geochemical Database: U.S. Geological Survey, Reston, VA.	U.S. Geological Survey	USGS		36.2597	-113.802	0.01	71	71	71	AAS	SEDIMENTARY	UNKNOWN	UNKNOWN	DOLOMITE
D265951		USGS		Geochemistry of rock samples from the National Geochemical Database: U.S. Geological Survey, Reston, VA.	U.S. Geological Survey	USGS		36.2597	-113.802	0.01	71	71	71	DNAA	SEDIMENTARY	UNKNOWN	UNKNOWN	DOLOMITE
D265951		USGS		Geochemistry of rock samples from the National Geochemical Database: U.S. Geological Survey, Reston, VA.	U.S. Geological Survey	USGS		36.2597	-113.802	0.01	71	71	71	FAP	SEDIMENTARY	UNKNOWN	UNKNOWN	DOLOMITE
D265951		USGS		Geochemistry of rock samples from the National Geochemical Database: U.S. Geological Survey, Reston, VA.	U.S. Geological Survey	USGS		36.2597	-113.802	0.01	71	71	71	ICPAES	SEDIMENTARY	UNKNOWN	UNKNOWN	DOLOMITE																							31		350	100	36000	17	1400	11000	2
D265951		USGS		Geochemistry of rock samples from the National Geochemical Database: U.S. Geological Survey, Reston, VA.	U.S. Geological Survey	USGS		36.2597	-113.802	0.01	71	71	71	NAA	SEDIMENTARY	UNKNOWN	UNKNOWN	DOLOMITE																							33.8			89.5			1130
D265951		USGS		Geochemistry of rock samples from the National Geochemical Database: U.S. Geological Survey, Reston, VA.	U.S. Geological Survey	USGS		36.2597	-113.802	0.01	71	71	71	UNKNOWN	SEDIMENTARY	UNKNOWN	UNKNOWN	DOLOMITE
D265954		USGS		Geochemistry of rock samples from the National Geochemical Database: U.S. Geological Survey, Reston, VA.	U.S. Geological Survey	USGS		36.2597	-113.802	0.01	71	71	71	AAS	SEDIMENTARY	UNKNOWN	UNKNOWN	DOLOMITE
D265954		USGS		Geochemistry of rock samples from the National Geochemical Database: U.S. Geological Survey, Reston, VA.	U.S. Geological Survey	USGS		36.2597	-113.802	0.01	71	71	71	DNAA	SEDIMENTARY	UNKNOWN	UNKNOWN	DOLOMITE
D265954		USGS		Geochemistry of rock samples from the National Geochemical Database: U.S. Geological Survey, Reston, VA.	U.S. Geological Survey	USGS		36.2597	-113.802	0.01	71	71	71	ICPAES	SEDIMENTARY	UNKNOWN	UNKNOWN	DOLOMITE																							0.21	190	3	3	17	5	990
D265954		USGS		Geochemistry of rock samples from the National Geochemical Database: U.S. Geological Survey, Reston, VA.	U.S. Geological Survey	USGS		36.2597	-113.802	0.01	71	71	71	NAA	SEDIMENTARY	UNKNOWN	UNKNOWN	DOLOMITE																							0.232			0.767			669
D265954		USGS		Geochemistry of rock samples from the National Geochemical Database: U.S. Geological Survey, Reston, VA.	U.S. Geological Survey	USGS		36.2597	-113.802	0.01	71	71	71	UNKNOWN	SEDIMENTARY	UNKNOWN	UNKNOWN	DOLOMITE
D265954		USGS		Geochemistry of rock samples from the National Geochemical Database: U.S. Geological Survey, Reston, VA.	U.S. Geological Survey	USGS		36.2597	-113.802	0.01	71	71	71	XRF	SEDIMENTARY	UNKNOWN	UNKNOWN	DOLOMITE		22.3	0.02	0.85							16.1	24.1			0.25	0.12
D272101		USGS		Geochemistry of rock samples from the National Geochemical Database: U.S. Geological Survey, Reston, VA.	U.S. Geological Survey	USGS		39.2792	-106.15	0.01	55	55	55	AAS	SEDIMENTARY	UNKNOWN	UNKNOWN	DOLOMITE
D272101		USGS		Geochemistry of rock samples from the National Geochemical Database: U.S. Geological Survey, Reston, VA.	U.S. Geological Survey	USGS		39.2792	-106.15	0.01	55	55	55	DNAA	SEDIMENTARY	UNKNOWN	UNKNOWN	DOLOMITE
D272101		USGS		Geochemistry of rock samples from the National Geochemical Database: U.S. Geological Survey, Reston, VA.	U.S. Geological Survey	USGS		39.2792	-106.15	0.01	55	55	55	ICPAES	SEDIMENTARY	UNKNOWN	UNKNOWN	DOLOMITE																							1.9	2300	7	8	170	6	78	30	3
D272101		USGS		Geochemistry of rock samples from the National Geochemical Database: U.S. Geological Survey, Reston, VA.	U.S. Geological Survey	USGS		39.2792	-106.15	0.01	55	55	55	NAA	SEDIMENTARY	UNKNOWN	UNKNOWN	DOLOMITE																							1.94			6.03			71.4
D272101		USGS		Geochemistry of rock samples from the National Geochemical Database: U.S. Geological Survey, Reston, VA.	U.S. Geological Survey	USGS		39.2792	-106.15	0.01	55	55	55	UNKNOWN	SEDIMENTARY	UNKNOWN	UNKNOWN	DOLOMITE
D272101		USGS		Geochemistry of rock samples from the National Geochemical Database: U.S. Geological Survey, Reston, VA.	U.S. Geological Survey	USGS		39.2792	-106.15	0.01	55	55	55	XRF	SEDIMENTARY	UNKNOWN	UNKNOWN	DOLOMITE		76.7		0.51						0.3	3.58	6.03			0.13
D272105		USGS		Geochemistry of rock samples from the National Geochemical Database: U.S. Geological Survey, Reston, VA.	U.S. Geological Survey	USGS		39.2792	-106.15	0.01	67	67	67	DNAA	SEDIMENTARY	UNKNOWN	UNKNOWN	DOLOMITE
D272105		USGS		Geochemistry of rock samples from the National Geochemical Database: U.S. Geological Survey, Reston, VA.	U.S. Geological Survey	USGS		39.2792	-106.15	0.01	67	67	67	ICPAES	SEDIMENTARY	UNKNOWN	UNKNOWN	DOLOMITE																							1.6	3600	10	7	750	130	28000	50	5
D272105		USGS		Geochemistry of rock samples from the National Geochemical Database: U.S. Geological Survey, Reston, VA.	U.S. Geological Survey	USGS		39.2792	-106.15	0.01	67	67	67	NAA	SEDIMENTARY	UNKNOWN	UNKNOWN	DOLOMITE																							1.61			5.4			27100
D272105		USGS		Geochemistry of rock samples from the National Geochemical Database: U.S. Geological Survey, Reston, VA.	U.S. Geological Survey	USGS		39.2792	-106.15	0.01	67	67	67	UNKNOWN	SEDIMENTARY	UNKNOWN	UNKNOWN	DOLOMITE
D275549		USGS		Geochemistry of rock samples from the National Geochemical Database: U.S. Geological Survey, Reston, VA.	U.S. Geological Survey	USGS		37.0697	-113.671	0.01				AAS	SEDIMENTARY	UNKNOWN	UNKNOWN	DOLOMITE
D275549		USGS		Geochemistry of rock samples from the National Geochemical Database: U.S. Geological Survey, Reston, VA.	U.S. Geological Survey	USGS		37.0697	-113.671	0.01				DNAA	SEDIMENTARY	UNKNOWN	UNKNOWN	DOLOMITE
D275549		USGS		Geochemistry of rock samples from the National Geochemical Database: U.S. Geological Survey, Reston, VA.	U.S. Geological Survey	USGS		37.0697	-113.671	0.01				ES	SEDIMENTARY	UNKNOWN	UNKNOWN	DOLOMITE																							1	300	30	50	5000	100	1000	300	15
D275549		USGS		Geochemistry of rock samples from the National Geochemical Database: U.S. Geological Survey, Reston, VA.	U.S. Geological Survey	USGS		37.0697	-113.671	0.01				ICPAES	SEDIMENTARY	UNKNOWN	UNKNOWN	DOLOMITE																							1.1	270	23	39	3000	65	1400	200	4
D275549		USGS		Geochemistry of rock samples from the National Geochemical Database: U.S. Geological Survey, Reston, VA.	U.S. Geological Survey	USGS		37.0697	-113.671	0.01				NAA	SEDIMENTARY	UNKNOWN	UNKNOWN	DOLOMITE																							1.03			31.1			1430
D275549		USGS		Geochemistry of rock samples from the National Geochemical Database: U.S. Geological Survey, Reston, VA.	U.S. Geological Survey	USGS		37.0697	-113.671	0.01				UNKNOWN	SEDIMENTARY	UNKNOWN	UNKNOWN	DOLOMITE
D275549		USGS		Geochemistry of rock samples from the National Geochemical Database: U.S. Geological Survey, Reston, VA.	U.S. Geological Survey	USGS		37.0697	-113.671	0.01				XRF	SEDIMENTARY	UNKNOWN	UNKNOWN	DOLOMITE		40.9	0.05	1.18							11.5	17.6		0.18	0.18	0.18
D276292		USGS		Geochemistry of rock samples from the National Geochemical Database: U.S. Geological Survey, Reston, VA.	U.S. Geological Survey	USGS		44.4458	-114.333	0.01	69	68	67	ICPAES	SEDIMENTARY	UNKNOWN	UNKNOWN	DOLOMITE																							0.15	200		3	5		53
D276301		USGS		Geochemistry of rock samples from the National Geochemical Database: U.S. Geological Survey, Reston, VA.	U.S. Geological Survey	USGS		44.4461	-114.334	0.01	69	68	67	ICPAES	SEDIMENTARY	UNKNOWN	UNKNOWN	DOLOMITE																							0.11	100		2	10		97
D276315		USGS		Geochemistry of rock samples from the National Geochemical Database: U.S. Geological Survey, Reston, VA.	U.S. Geological Survey	USGS		44.4861	-114.331	0.01	69	68	67	ICPAES	SEDIMENTARY	UNKNOWN	UNKNOWN	DOLOMITE																							1.1	710	3	3	1		93
D276333		USGS		Geochemistry of rock samples from the National Geochemical Database: U.S. Geological Survey, Reston, VA.	U.S. Geological Survey	USGS		40.8303	-117.526	0.01	3	35	67	AAS	SEDIMENTARY	UNKNOWN	UNKNOWN	DOLOMITE
D276333		USGS		Geochemistry of rock samples from the National Geochemical Database: U.S. Geological Survey, Reston, VA.	U.S. Geological Survey	USGS		40.8303	-117.526	0.01	3	35	67	ICPAES	SEDIMENTARY	UNKNOWN	UNKNOWN	DOLOMITE																							4	660	1700	100	15		36
D276333		USGS		Geochemistry of rock samples from the National Geochemical Database: U.S. Geological Survey, Reston, VA.	U.S. Geological Survey	USGS		40.8303	-117.526	0.01	3	35	67	ISE	SEDIMENTARY	UNKNOWN	UNKNOWN	DOLOMITE
D276333		USGS		Geochemistry of rock samples from the National Geochemical Database: U.S. Geological Survey, Reston, VA.	U.S. Geological Survey	USGS		40.8303	-117.526	0.01	3	35	67	NAA	SEDIMENTARY	UNKNOWN	UNKNOWN	DOLOMITE																							3.97		1370	91.3			62.8
D276337		USGS		Geochemistry of rock samples from the National Geochemical Database: U.S. Geological Survey, Reston, VA.	U.S. Geological Survey	USGS		40.8267	-117.529	0.01	3	35	67	AAS	SEDIMENTARY	UNKNOWN	UNKNOWN	DOLOMITE
D276337		USGS		Geochemistry of rock samples from the National Geochemical Database: U.S. Geological Survey, Reston, VA.	U.S. Geological Survey	USGS		40.8267	-117.529	0.01	3	35	67	ICPAES	SEDIMENTARY	UNKNOWN	UNKNOWN	DOLOMITE																							1.9	56	280	14	180		190	150	8
D276337		USGS		Geochemistry of rock samples from the National Geochemical Database: U.S. Geological Survey, Reston, VA.	U.S. Geological Survey	USGS		40.8267	-117.529	0.01	3	35	67	NAA	SEDIMENTARY	UNKNOWN	UNKNOWN	DOLOMITE																							1.78		201	12.3			234
D277044		USGS		Geochemistry of rock samples from the National Geochemical Database: U.S. Geological Survey, Reston, VA.	U.S. Geological Survey	USGS		40.8322	-117.526	0.01	3	35	67	AAS	SEDIMENTARY	UNKNOWN	UNKNOWN	DOLOMITE
D277044		USGS		Geochemistry of rock samples from the National Geochemical Database: U.S. Geological Survey, Reston, VA.	U.S. Geological Survey	USGS		40.8322	-117.526	0.01	3	35	67	ICPAES	SEDIMENTARY	UNKNOWN	UNKNOWN	DOLOMITE																							0.82	70	390	24	16		130	250
D277044		USGS		Geochemistry of rock samples from the National Geochemical Database: U.S. Geological Survey, Reston, VA.	U.S. Geological Survey	USGS		40.8322	-117.526	0.01	3	35	67	NAA	SEDIMENTARY	UNKNOWN	UNKNOWN	DOLOMITE																							0.807		310	20.6			134
D278570		USGS		Geochemistry of rock samples from the National Geochemical Database: U.S. Geological Survey, Reston, VA.	U.S. Geological Survey	USGS		40.8236	-117.512	0.01	3	35	67	AAS	SEDIMENTARY	UNKNOWN	UNKNOWN	DOLOMITE
D278570		USGS		Geochemistry of rock samples from the National Geochemical Database: U.S. Geological Survey, Reston, VA.	U.S. Geological Survey	USGS		40.8236	-117.512	0.01	3	35	67	ICPAES	SEDIMENTARY	UNKNOWN	UNKNOWN	DOLOMITE																							1.7	350	7	4	10		82	110
D278570		USGS		Geochemistry of rock samples from the National Geochemical Database: U.S. Geological Survey, Reston, VA.	U.S. Geological Survey	USGS		40.8236	-117.512	0.01	3	35	67	ISE	SEDIMENTARY	UNKNOWN	UNKNOWN	DOLOMITE
D278570		USGS		Geochemistry of rock samples from the National Geochemical Database: U.S. Geological Survey, Reston, VA.	U.S. Geological Survey	USGS		40.8236	-117.512	0.01	3	35	67	NAA	SEDIMENTARY	UNKNOWN	UNKNOWN	DOLOMITE																							1.67		6.9	3.04			96.4
D282896		USGS		Geochemistry of rock samples from the National Geochemical Database: U.S. Geological Survey, Reston, VA.	U.S. Geological Survey	USGS		37.6028	-110.52	0.01	56	56	56	ES	SEDIMENTARY	UNKNOWN	UNKNOWN	DOLOMITE																							0.1	1500			5
D282897		USGS		Geochemistry of rock samples from the National Geochemical Database: U.S. Geological Survey, Reston, VA.	U.S. Geological Survey	USGS		37.6028	-110.52	0.01	56	56	56	ES	SEDIMENTARY	UNKNOWN	UNKNOWN	DOLOMITE																							0.05	500			5
D282898		USGS		Geochemistry of rock samples from the National Geochemical Database: U.S. Geological Survey, Reston, VA.	U.S. Geological Survey	USGS		37.6028	-110.52	0.01	56	56	56	ES	SEDIMENTARY	UNKNOWN	UNKNOWN	DOLOMITE																							0.05	700			5
D282899		USGS		Geochemistry of rock samples from the National Geochemical Database: U.S. Geological Survey, Reston, VA.	U.S. Geological Survey	USGS		37.5989	-110.511	0.01	56	56	56	ES	SEDIMENTARY	UNKNOWN	UNKNOWN	DOLOMITE																							0.15	1500			5
D282900		USGS		Geochemistry of rock samples from the National Geochemical Database: U.S. Geological Survey, Reston, VA.	U.S. Geological Survey	USGS		37.5983	-110.511	0.01	56	56	56	ES	SEDIMENTARY	UNKNOWN	UNKNOWN	DOLOMITE																								1000
D282901		USGS		Geochemistry of rock samples from the National Geochemical Database: U.S. Geological Survey, Reston, VA.	U.S. Geological Survey	USGS		37.5889	-110.51	0.01	56	56	56	ES	SEDIMENTARY	UNKNOWN	UNKNOWN	DOLOMITE																							0.1	1500
D282902		USGS		Geochemistry of rock samples from the National Geochemical Database: U.S. Geological Survey, Reston, VA.	U.S. Geological Survey	USGS		37.5889	-110.51	0.01	56	56	56	ES	SEDIMENTARY	UNKNOWN	UNKNOWN	DOLOMITE																							0.1	500
D282903		USGS		Geochemistry of rock samples from the National Geochemical Database: U.S. Geological Survey, Reston, VA.	U.S. Geological Survey	USGS		37.5339	-110.519	0.01	56	56	56	ES	SEDIMENTARY	UNKNOWN	UNKNOWN	DOLOMITE																							0.1	1500			5
D282904		USGS		Geochemistry of rock samples from the National Geochemical Database: U.S. Geological Survey, Reston, VA.	U.S. Geological Survey	USGS		37.5075	-110.518	0.01	56	56	56	ES	SEDIMENTARY	UNKNOWN	UNKNOWN	DOLOMITE																							0.2	1500			5
D282905		USGS		Geochemistry of rock samples from the National Geochemical Database: U.S. Geological Survey, Reston, VA.	U.S. Geological Survey	USGS		37.5075	-110.518	0.01	56	56	56	ES	SEDIMENTARY	UNKNOWN	UNKNOWN	DOLOMITE																								1500
D282906		USGS		Geochemistry of rock samples from the National Geochemical Database: U.S. Geological Survey, Reston, VA.	U.S. Geological Survey	USGS		37.4289	-110.528	0.01	56	56	56	ES	SEDIMENTARY	UNKNOWN	UNKNOWN	DOLOMITE																							0.15	2000
D282907		USGS		Geochemistry of rock samples from the National Geochemical Database: U.S. Geological Survey, Reston, VA.	U.S. Geological Survey	USGS		37.4289	-110.528	0.01	56	56	56	ES	SEDIMENTARY	UNKNOWN	UNKNOWN	DOLOMITE																							0.1	1500
D282908		USGS		Geochemistry of rock samples from the National Geochemical Database: U.S. Geological Survey, Reston, VA.	U.S. Geological Survey	USGS		37.4125	-110.477	0.01	56	56	56	ES	SEDIMENTARY	UNKNOWN	UNKNOWN	DOLOMITE																							0.07	1500
D282909		USGS		Geochemistry of rock samples from the National Geochemical Database: U.S. Geological Survey, Reston, VA.	U.S. Geological Survey	USGS		37.4092	-110.439	0.01	56	56	56	ES	SEDIMENTARY	UNKNOWN	UNKNOWN	DOLOMITE																							0.2	1500
D282910		USGS		Geochemistry of rock samples from the National Geochemical Database: U.S. Geological Survey, Reston, VA.	U.S. Geological Survey	USGS		37.4097	-110.438	0.01	56	56	56	ES	SEDIMENTARY	UNKNOWN	UNKNOWN	DOLOMITE																							0.07	1500
D282911		USGS		Geochemistry of rock samples from the National Geochemical Database: U.S. Geological Survey, Reston, VA.	U.S. Geological Survey	USGS		38.2008	-109.372	0.01	56	56	56	ES	SEDIMENTARY	UNKNOWN	UNKNOWN	DOLOMITE																							0.5	1500
D282912		USGS		Geochemistry of rock samples from the National Geochemical Database: U.S. Geological Survey, Reston, VA.	U.S. Geological Survey	USGS		38.8211	-109.141	0.01	56	56	56	ES	SEDIMENTARY	UNKNOWN	UNKNOWN	DOLOMITE																							0.1	1000			5
D283807		USGS		Geochemistry of rock samples from the National Geochemical Database: U.S. Geological Survey, Reston, VA.	U.S. Geological Survey	USGS		39.3839	-114.158	0.01				ES	SEDIMENTARY	UNKNOWN	UNKNOWN	DOLOMITE																								30
D291450		USGS		Geochemistry of rock samples from the National Geochemical Database: U.S. Geological Survey, Reston, VA.	U.S. Geological Survey	USGS		39.3	-106.167	0.01				AAS	SEDIMENTARY	UNKNOWN	UNKNOWN	DOLOMITE																												490	24000	22
D291450		USGS		Geochemistry of rock samples from the National Geochemical Database: U.S. Geological Survey, Reston, VA.	U.S. Geological Survey	USGS		39.3	-106.167	0.01				ES	SEDIMENTARY	UNKNOWN	UNKNOWN	DOLOMITE																							2	2000	50	30	700	500			300
D291450		USGS		Geochemistry of rock samples from the National Geochemical Database: U.S. Geological Survey, Reston, VA.	U.S. Geological Survey	USGS		39.3	-106.167	0.01				MISC	SEDIMENTARY	UNKNOWN	UNKNOWN	DOLOMITE
D291451		USGS		Geochemistry of rock samples from the National Geochemical Database: U.S. Geological Survey, Reston, VA.	U.S. Geological Survey	USGS		39.3	-106.167	0.01				AAS	SEDIMENTARY	UNKNOWN	UNKNOWN	DOLOMITE																												830	26000	20
D291451		USGS		Geochemistry of rock samples from the National Geochemical Database: U.S. Geological Survey, Reston, VA.	U.S. Geological Survey	USGS		39.3	-106.167	0.01				ES	SEDIMENTARY	UNKNOWN	UNKNOWN	DOLOMITE																							2	1500	15	20	1500				500
D291451		USGS		Geochemistry of rock samples from the National Geochemical Database: U.S. Geological Survey, Reston, VA.	U.S. Geological Survey	USGS		39.3	-106.167	0.01				MISC	SEDIMENTARY	UNKNOWN	UNKNOWN	DOLOMITE
D296680		USGS		Geochemistry of rock samples from the National Geochemical Database: U.S. Geological Survey, Reston, VA.	U.S. Geological Survey	USGS		36.8667	-116.333	0.01	55	55	55	AAS	SEDIMENTARY	UNKNOWN	UNKNOWN	DOLOMITE																														21
D296680		USGS		Geochemistry of rock samples from the National Geochemical Database: U.S. Geological Survey, Reston, VA.	U.S. Geological Survey	USGS		36.8667	-116.333	0.01	55	55	55	ES	SEDIMENTARY	UNKNOWN	UNKNOWN	DOLOMITE																							1	5000	150				700
D296680		USGS		Geochemistry of rock samples from the National Geochemical Database: U.S. Geological Survey, Reston, VA.	U.S. Geological Survey	USGS		36.8667	-116.333	0.01	55	55	55	UNKNOWN	SEDIMENTARY	UNKNOWN	UNKNOWN	DOLOMITE																												2.9	440
D296680		USGS		Geochemistry of rock samples from the National Geochemical Database: U.S. Geological Survey, Reston, VA.	U.S. Geological Survey	USGS		36.8667	-116.333	0.01	55	55	55	XRF	SEDIMENTARY	UNKNOWN	UNKNOWN	DOLOMITE		89.9		0.16						0.79	2.72	1.12			0.08
D296693		USGS		Geochemistry of rock samples from the National Geochemical Database: U.S. Geological Survey, Reston, VA.	U.S. Geological Survey	USGS		36.8667	-116.297	0.01	55	55	55	ES	SEDIMENTARY	UNKNOWN	UNKNOWN	DOLOMITE																							0.3	100			10
D296693		USGS		Geochemistry of rock samples from the National Geochemical Database: U.S. Geological Survey, Reston, VA.	U.S. Geological Survey	USGS		36.8667	-116.297	0.01	55	55	55	XRF	SEDIMENTARY	UNKNOWN	UNKNOWN	DOLOMITE		1.42		0.15							22.1	30.2
D296803		USGS		Geochemistry of rock samples from the National Geochemical Database: U.S. Geological Survey, Reston, VA.	U.S. Geological Survey	USGS		36.8639	-116.306	0.01	55	55	55	AAS	SEDIMENTARY	UNKNOWN	UNKNOWN	DOLOMITE																														950
D296803		USGS		Geochemistry of rock samples from the National Geochemical Database: U.S. Geological Survey, Reston, VA.	U.S. Geological Survey	USGS		36.8639	-116.306	0.01	55	55	55	ES	SEDIMENTARY	UNKNOWN	UNKNOWN	DOLOMITE																							3	700	15		30		500	700
D296803		USGS		Geochemistry of rock samples from the National Geochemical Database: U.S. Geological Survey, Reston, VA.	U.S. Geological Survey	USGS		36.8639	-116.306	0.01	55	55	55	UNKNOWN	SEDIMENTARY	UNKNOWN	UNKNOWN	DOLOMITE																												3.6	680
D296803		USGS		Geochemistry of rock samples from the National Geochemical Database: U.S. Geological Survey, Reston, VA.	U.S. Geological Survey	USGS		36.8639	-116.306	0.01	55	55	55	XRF	SEDIMENTARY	UNKNOWN	UNKNOWN	DOLOMITE		13		0.53						0.1	13.7	36.7
D312631		USGS		Geochemistry of rock samples from the National Geochemical Database: U.S. Geological Survey, Reston, VA.	U.S. Geological Survey	USGS		40.9833	-105.55	0.01				AAS	SEDIMENTARY	UNKNOWN	UNKNOWN	DOLOMITE
D312631		USGS		Geochemistry of rock samples from the National Geochemical Database: U.S. Geological Survey, Reston, VA.	U.S. Geological Survey	USGS		40.9833	-105.55	0.01				ES	SEDIMENTARY	UNKNOWN	UNKNOWN	DOLOMITE																							0.15	700	5		20
D312631		USGS		Geochemistry of rock samples from the National Geochemical Database: U.S. Geological Survey, Reston, VA.	U.S. Geological Survey	USGS		40.9833	-105.55	0.01				ICPAES	SEDIMENTARY	UNKNOWN	UNKNOWN	DOLOMITE																							0.13	300	7	4	8
D312631		USGS		Geochemistry of rock samples from the National Geochemical Database: U.S. Geological Survey, Reston, VA.	U.S. Geological Survey	USGS		40.9833	-105.55	0.01				ISE	SEDIMENTARY	UNKNOWN	UNKNOWN	DOLOMITE
D319293		USGS		Geochemistry of rock samples from the National Geochemical Database: U.S. Geological Survey, Reston, VA.	U.S. Geological Survey	USGS		39.3042	-118.064	0.01	56	57.5	59	AAS	SEDIMENTARY	UNKNOWN	UNKNOWN	DOLOMITE
D319293		USGS		Geochemistry of rock samples from the National Geochemical Database: U.S. Geological Survey, Reston, VA.	U.S. Geological Survey	USGS		39.3042	-118.064	0.01	56	57.5	59	ES	SEDIMENTARY	UNKNOWN	UNKNOWN	DOLOMITE																							0.7	150
D319293		USGS		Geochemistry of rock samples from the National Geochemical Database: U.S. Geological Survey, Reston, VA.	U.S. Geological Survey	USGS		39.3042	-118.064	0.01	56	57.5	59	ICPAES	SEDIMENTARY	UNKNOWN	UNKNOWN	DOLOMITE																												0.2
D325575		USGS		Geochemistry of rock samples from the National Geochemical Database: U.S. Geological Survey, Reston, VA.	U.S. Geological Survey	USGS		32.1667	-121.267	0.01				MISC	SEDIMENTARY	UNKNOWN	UNKNOWN	DOLOMITE																	40.6
D325575		USGS		Geochemistry of rock samples from the National Geochemical Database: U.S. Geological Survey, Reston, VA.	U.S. Geological Survey	USGS		32.1667	-121.267	0.01				TITR	SEDIMENTARY	UNKNOWN	UNKNOWN	DOLOMITE								0.72
D325575		USGS		Geochemistry of rock samples from the National Geochemical Database: U.S. Geological Survey, Reston, VA.	U.S. Geological Survey	USGS		32.1667	-121.267	0.01				XRF	SEDIMENTARY	UNKNOWN	UNKNOWN	DOLOMITE		7.79	0.1	2						0.62	16.7	27.4		0.46	0.29	0.27
D333367		USGS		Geochemistry of rock samples from the National Geochemical Database: U.S. Geological Survey, Reston, VA.	U.S. Geological Survey	USGS		40.0106	-112.065	0.01	67	67	67	ES	SEDIMENTARY	UNKNOWN	UNKNOWN	DOLOMITE																							2	150	10		7				0.5
D333367		USGS		Geochemistry of rock samples from the National Geochemical Database: U.S. Geological Survey, Reston, VA.	U.S. Geological Survey	USGS		40.0106	-112.065	0.01	67	67	67	ICPAES	SEDIMENTARY	UNKNOWN	UNKNOWN	DOLOMITE																												0.6	133	91
D333378		USGS		Geochemistry of rock samples from the National Geochemical Database: U.S. Geological Survey, Reston, VA.	U.S. Geological Survey	USGS		40.0117	-112.129	0.01	68	68	68	ES	SEDIMENTARY	UNKNOWN	UNKNOWN	DOLOMITE																							0.05	500			5
D333378		USGS		Geochemistry of rock samples from the National Geochemical Database: U.S. Geological Survey, Reston, VA.	U.S. Geological Survey	USGS		40.0117	-112.129	0.01	68	68	68	ICPAES	SEDIMENTARY	UNKNOWN	UNKNOWN	DOLOMITE																												0.9	58	6
D333379		USGS		Geochemistry of rock samples from the National Geochemical Database: U.S. Geological Survey, Reston, VA.	U.S. Geological Survey	USGS		40.0117	-112.129	0.01	68	68	68	ES	SEDIMENTARY	UNKNOWN	UNKNOWN	DOLOMITE																							0.5	500	20		7
D333379		USGS		Geochemistry of rock samples from the National Geochemical Database: U.S. Geological Survey, Reston, VA.	U.S. Geological Survey	USGS		40.0117	-112.129	0.01	68	68	68	ICPAES	SEDIMENTARY	UNKNOWN	UNKNOWN	DOLOMITE																												1.7	169	202
D333382		USGS		Geochemistry of rock samples from the National Geochemical Database: U.S. Geological Survey, Reston, VA.	U.S. Geological Survey	USGS		40.0072	-112.066	0.01	67	67	67	ES	SEDIMENTARY	UNKNOWN	UNKNOWN	DOLOMITE																							0.2	150	5		5
D333382		USGS		Geochemistry of rock samples from the National Geochemical Database: U.S. Geological Survey, Reston, VA.	U.S. Geological Survey	USGS		40.0072	-112.066	0.01	67	67	67	ICPAES	SEDIMENTARY	UNKNOWN	UNKNOWN	DOLOMITE																												1	56	56
D333386		USGS		Geochemistry of rock samples from the National Geochemical Database: U.S. Geological Survey, Reston, VA.	U.S. Geological Survey	USGS		40.0125	-112.062	0.01	67	67	67	ES	SEDIMENTARY	UNKNOWN	UNKNOWN	DOLOMITE																							0.5	500			7				0.5
D333386		USGS		Geochemistry of rock samples from the National Geochemical Database: U.S. Geological Survey, Reston, VA.	U.S. Geological Survey	USGS		40.0125	-112.062	0.01	67	67	67	ICPAES	SEDIMENTARY	UNKNOWN	UNKNOWN	DOLOMITE																												0.3	28	46
D333387		USGS		Geochemistry of rock samples from the National Geochemical Database: U.S. Geological Survey, Reston, VA.	U.S. Geological Survey	USGS		40.0125	-112.062	0.01	67	67	67	ES	SEDIMENTARY	UNKNOWN	UNKNOWN	DOLOMITE																							0.5	200			7				3
D333387		USGS		Geochemistry of rock samples from the National Geochemical Database: U.S. Geological Survey, Reston, VA.	U.S. Geological Survey	USGS		40.0125	-112.062	0.01	67	67	67	ICPAES	SEDIMENTARY	UNKNOWN	UNKNOWN	DOLOMITE																												0.2	44	47
D333393		USGS		Geochemistry of rock samples from the National Geochemical Database: U.S. Geological Survey, Reston, VA.	U.S. Geological Survey	USGS		40.0425	-112.065	0.01	55	62	69	ES	SEDIMENTARY	UNKNOWN	UNKNOWN	DOLOMITE																							0.15	100
D333393		USGS		Geochemistry of rock samples from the National Geochemical Database: U.S. Geological Survey, Reston, VA.	U.S. Geological Survey	USGS		40.0425	-112.065	0.01	55	62	69	ICPAES	SEDIMENTARY	UNKNOWN	UNKNOWN	DOLOMITE																												0.4	62	14
D333398		USGS		Geochemistry of rock samples from the National Geochemical Database: U.S. Geological Survey, Reston, VA.	U.S. Geological Survey	USGS		40.0208	-112.06	0.01	69	69	69	ES	SEDIMENTARY	UNKNOWN	UNKNOWN	DOLOMITE																							0.1	150
D333398		USGS		Geochemistry of rock samples from the National Geochemical Database: U.S. Geological Survey, Reston, VA.	U.S. Geological Survey	USGS		40.0208	-112.06	0.01	69	69	69	ICPAES	SEDIMENTARY	UNKNOWN	UNKNOWN	DOLOMITE																												0.2	72	25
D333415		USGS		Geochemistry of rock samples from the National Geochemical Database: U.S. Geological Survey, Reston, VA.	U.S. Geological Survey	USGS		40.0483	-112.2	0.01	68	68	68	ES	SEDIMENTARY	UNKNOWN	UNKNOWN	DOLOMITE																							0.1	30	10		5		500
D333415		USGS		Geochemistry of rock samples from the National Geochemical Database: U.S. Geological Survey, Reston, VA.	U.S. Geological Survey	USGS		40.0483	-112.2	0.01	68	68	68	ICPAES	SEDIMENTARY	UNKNOWN	UNKNOWN	DOLOMITE																												2.2	885	8
D333460		USGS		Geochemistry of rock samples from the National Geochemical Database: U.S. Geological Survey, Reston, VA.	U.S. Geological Survey	USGS		39.9822	-112.139	0.01	67	67	67	ES	SEDIMENTARY	UNKNOWN	UNKNOWN	DOLOMITE																							0.3	150	5		7
D333460		USGS		Geochemistry of rock samples from the National Geochemical Database: U.S. Geological Survey, Reston, VA.	U.S. Geological Survey	USGS		39.9822	-112.139	0.01	67	67	67	ICPAES	SEDIMENTARY	UNKNOWN	UNKNOWN	DOLOMITE																												0.3	20	31
D333461		USGS		Geochemistry of rock samples from the National Geochemical Database: U.S. Geological Survey, Reston, VA.	U.S. Geological Survey	USGS		39.9822	-112.139	0.01	67	67	67	ES	SEDIMENTARY	UNKNOWN	UNKNOWN	DOLOMITE																							0.3	100	5		7
D333461		USGS		Geochemistry of rock samples from the National Geochemical Database: U.S. Geological Survey, Reston, VA.	U.S. Geological Survey	USGS		39.9822	-112.139	0.01	67	67	67	ICPAES	SEDIMENTARY	UNKNOWN	UNKNOWN	DOLOMITE																														12
D333488		USGS		Geochemistry of rock samples from the National Geochemical Database: U.S. Geological Survey, Reston, VA.	U.S. Geological Survey	USGS		40.0047	-112.126	0.01	68	68	68	ES	SEDIMENTARY	UNKNOWN	UNKNOWN	DOLOMITE																								700			5
D333488		USGS		Geochemistry of rock samples from the National Geochemical Database: U.S. Geological Survey, Reston, VA.	U.S. Geological Survey	USGS		40.0047	-112.126	0.01	68	68	68	ICPAES	SEDIMENTARY	UNKNOWN	UNKNOWN	DOLOMITE																												3	47
D336584		USGS		Geochemistry of rock samples from the National Geochemical Database: U.S. Geological Survey, Reston, VA.	U.S. Geological Survey	USGS		41.2067	-114.916	0.01	55	55	55	AAS	SEDIMENTARY	UNKNOWN	UNKNOWN	DOLOMITE
D336584		USGS		Geochemistry of rock samples from the National Geochemical Database: U.S. Geological Survey, Reston, VA.	U.S. Geological Survey	USGS		41.2067	-114.916	0.01	55	55	55	ES	SEDIMENTARY	UNKNOWN	UNKNOWN	DOLOMITE																								500
D336584		USGS		Geochemistry of rock samples from the National Geochemical Database: U.S. Geological Survey, Reston, VA.	U.S. Geological Survey	USGS		41.2067	-114.916	0.01	55	55	55	ICPAES	SEDIMENTARY	UNKNOWN	UNKNOWN	DOLOMITE																											0.34		1
D336585		USGS		Geochemistry of rock samples from the National Geochemical Database: U.S. Geological Survey, Reston, VA.	U.S. Geological Survey	USGS		41.2067	-114.916	0.01	55	55	55	AAS	SEDIMENTARY	UNKNOWN	UNKNOWN	DOLOMITE
D336585		USGS		Geochemistry of rock samples from the National Geochemical Database: U.S. Geological Survey, Reston, VA.	U.S. Geological Survey	USGS		41.2067	-114.916	0.01	55	55	55	ES	SEDIMENTARY	UNKNOWN	UNKNOWN	DOLOMITE																							0.05	150
D336585		USGS		Geochemistry of rock samples from the National Geochemical Database: U.S. Geological Survey, Reston, VA.	U.S. Geological Survey	USGS		41.2067	-114.916	0.01	55	55	55	ICPAES	SEDIMENTARY	UNKNOWN	UNKNOWN	DOLOMITE																											0.58		1.4
D336587		USGS		Geochemistry of rock samples from the National Geochemical Database: U.S. Geological Survey, Reston, VA.	U.S. Geological Survey	USGS		41.2067	-114.916	0.01	55	55	55	AAS	SEDIMENTARY	UNKNOWN	UNKNOWN	DOLOMITE
D336587		USGS		Geochemistry of rock samples from the National Geochemical Database: U.S. Geological Survey, Reston, VA.	U.S. Geological Survey	USGS		41.2067	-114.916	0.01	55	55	55	ES	SEDIMENTARY	UNKNOWN	UNKNOWN	DOLOMITE																								300
D336587		USGS		Geochemistry of rock samples from the National Geochemical Database: U.S. Geological Survey, Reston, VA.	U.S. Geological Survey	USGS		41.2067	-114.916	0.01	55	55	55	ICPAES	SEDIMENTARY	UNKNOWN	UNKNOWN	DOLOMITE																											0.4		0.54
D336588		USGS		Geochemistry of rock samples from the National Geochemical Database: U.S. Geological Survey, Reston, VA.	U.S. Geological Survey	USGS		41.2067	-114.916	0.01	55	55	55	ES	SEDIMENTARY	UNKNOWN	UNKNOWN	DOLOMITE																								70
D336588		USGS		Geochemistry of rock samples from the National Geochemical Database: U.S. Geological Survey, Reston, VA.	U.S. Geological Survey	USGS		41.2067	-114.916	0.01	55	55	55	ICPAES	SEDIMENTARY	UNKNOWN	UNKNOWN	DOLOMITE																											0.24		0.7
D336589		USGS		Geochemistry of rock samples from the National Geochemical Database: U.S. Geological Survey, Reston, VA.	U.S. Geological Survey	USGS		41.2067	-114.916	0.01	55	55	55	AAS	SEDIMENTARY	UNKNOWN	UNKNOWN	DOLOMITE
D336589		USGS		Geochemistry of rock samples from the National Geochemical Database: U.S. Geological Survey, Reston, VA.	U.S. Geological Survey	USGS		41.2067	-114.916	0.01	55	55	55	ES	SEDIMENTARY	UNKNOWN	UNKNOWN	DOLOMITE																							0.07	200			5
D336589		USGS		Geochemistry of rock samples from the National Geochemical Database: U.S. Geological Survey, Reston, VA.	U.S. Geological Survey	USGS		41.2067	-114.916	0.01	55	55	55	ICPAES	SEDIMENTARY	UNKNOWN	UNKNOWN	DOLOMITE																											2.7		1	0.96
D336590		USGS		Geochemistry of rock samples from the National Geochemical Database: U.S. Geological Survey, Reston, VA.	U.S. Geological Survey	USGS		41.2067	-114.916	0.01	55	55	55	ES	SEDIMENTARY	UNKNOWN	UNKNOWN	DOLOMITE																								200					200
D336590		USGS		Geochemistry of rock samples from the National Geochemical Database: U.S. Geological Survey, Reston, VA.	U.S. Geological Survey	USGS		41.2067	-114.916	0.01	55	55	55	ICPAES	SEDIMENTARY	UNKNOWN	UNKNOWN	DOLOMITE																											0.19		0.33
D336591		USGS		Geochemistry of rock samples from the National Geochemical Database: U.S. Geological Survey, Reston, VA.	U.S. Geological Survey	USGS		41.2067	-114.916	0.01	55	55	55	ES	SEDIMENTARY	UNKNOWN	UNKNOWN	DOLOMITE																								100					200
D336591		USGS		Geochemistry of rock samples from the National Geochemical Database: U.S. Geological Survey, Reston, VA.	U.S. Geological Survey	USGS		41.2067	-114.916	0.01	55	55	55	ICPAES	SEDIMENTARY	UNKNOWN	UNKNOWN	DOLOMITE																											0.26		0.3
D336592		USGS		Geochemistry of rock samples from the National Geochemical Database: U.S. Geological Survey, Reston, VA.	U.S. Geological Survey	USGS		41.2067	-114.916	0.01	55	55	55	AAS	SEDIMENTARY	UNKNOWN	UNKNOWN	DOLOMITE
D336592		USGS		Geochemistry of rock samples from the National Geochemical Database: U.S. Geological Survey, Reston, VA.	U.S. Geological Survey	USGS		41.2067	-114.916	0.01	55	55	55	ES	SEDIMENTARY	UNKNOWN	UNKNOWN	DOLOMITE																							0.15	500			10		300
D336592		USGS		Geochemistry of rock samples from the National Geochemical Database: U.S. Geological Survey, Reston, VA.	U.S. Geological Survey	USGS		41.2067	-114.916	0.01	55	55	55	ICPAES	SEDIMENTARY	UNKNOWN	UNKNOWN	DOLOMITE																											3.9	1.5	380	2.1
D336593		USGS		Geochemistry of rock samples from the National Geochemical Database: U.S. Geological Survey, Reston, VA.	U.S. Geological Survey	USGS		41.2067	-114.916	0.01	55	55	55	AAS	SEDIMENTARY	UNKNOWN	UNKNOWN	DOLOMITE
D336593		USGS		Geochemistry of rock samples from the National Geochemical Database: U.S. Geological Survey, Reston, VA.	U.S. Geological Survey	USGS		41.2067	-114.916	0.01	55	55	55	ES	SEDIMENTARY	UNKNOWN	UNKNOWN	DOLOMITE																								500
D336593		USGS		Geochemistry of rock samples from the National Geochemical Database: U.S. Geological Survey, Reston, VA.	U.S. Geological Survey	USGS		41.2067	-114.916	0.01	55	55	55	ICPAES	SEDIMENTARY	UNKNOWN	UNKNOWN	DOLOMITE																											0.85	0.11	51
D336594		USGS		Geochemistry of rock samples from the National Geochemical Database: U.S. Geological Survey, Reston, VA.	U.S. Geological Survey	USGS		41.2067	-114.916	0.01	55	55	55	ES	SEDIMENTARY	UNKNOWN	UNKNOWN	DOLOMITE																								100
D336594		USGS		Geochemistry of rock samples from the National Geochemical Database: U.S. Geological Survey, Reston, VA.	U.S. Geological Survey	USGS		41.2067	-114.916	0.01	55	55	55	ICPAES	SEDIMENTARY	UNKNOWN	UNKNOWN	DOLOMITE																											0.29		0.8
D336595		USGS		Geochemistry of rock samples from the National Geochemical Database: U.S. Geological Survey, Reston, VA.	U.S. Geological Survey	USGS		41.2067	-114.916	0.01	55	55	55	ES	SEDIMENTARY	UNKNOWN	UNKNOWN	DOLOMITE																								150
D336595		USGS		Geochemistry of rock samples from the National Geochemical Database: U.S. Geological Survey, Reston, VA.	U.S. Geological Survey	USGS		41.2067	-114.916	0.01	55	55	55	ICPAES	SEDIMENTARY	UNKNOWN	UNKNOWN	DOLOMITE																											0.96		1
D336596		USGS		Geochemistry of rock samples from the National Geochemical Database: U.S. Geological Survey, Reston, VA.	U.S. Geological Survey	USGS		41.2067	-114.916	0.01	55	55	55	AAS	SEDIMENTARY	UNKNOWN	UNKNOWN	DOLOMITE
D336596		USGS		Geochemistry of rock samples from the National Geochemical Database: U.S. Geological Survey, Reston, VA.	U.S. Geological Survey	USGS		41.2067	-114.916	0.01	55	55	55	ES	SEDIMENTARY	UNKNOWN	UNKNOWN	DOLOMITE																							0.07	100
D336596		USGS		Geochemistry of rock samples from the National Geochemical Database: U.S. Geological Survey, Reston, VA.	U.S. Geological Survey	USGS		41.2067	-114.916	0.01	55	55	55	ICPAES	SEDIMENTARY	UNKNOWN	UNKNOWN	DOLOMITE																											2.2		2.5	1.8
D336597		USGS		Geochemistry of rock samples from the National Geochemical Database: U.S. Geological Survey, Reston, VA.	U.S. Geological Survey	USGS		41.2067	-114.916	0.01	55	55	55	AAS	SEDIMENTARY	UNKNOWN	UNKNOWN	DOLOMITE
D336597		USGS		Geochemistry of rock samples from the National Geochemical Database: U.S. Geological Survey, Reston, VA.	U.S. Geological Survey	USGS		41.2067	-114.916	0.01	55	55	55	ES	SEDIMENTARY	UNKNOWN	UNKNOWN	DOLOMITE																							0.05	300
D336597		USGS		Geochemistry of rock samples from the National Geochemical Database: U.S. Geological Survey, Reston, VA.	U.S. Geological Survey	USGS		41.2067	-114.916	0.01	55	55	55	ICPAES	SEDIMENTARY	UNKNOWN	UNKNOWN	DOLOMITE																											1.3		1.6
D336598		USGS		Geochemistry of rock samples from the National Geochemical Database: U.S. Geological Survey, Reston, VA.	U.S. Geological Survey	USGS		41.2067	-114.916	0.01	55	55	55	ES	SEDIMENTARY	UNKNOWN	UNKNOWN	DOLOMITE																								300
D336598		USGS		Geochemistry of rock samples from the National Geochemical Database: U.S. Geological Survey, Reston, VA.	U.S. Geological Survey	USGS		41.2067	-114.916	0.01	55	55	55	ICPAES	SEDIMENTARY	UNKNOWN	UNKNOWN	DOLOMITE																											0.97	0.043	5.1
D336599		USGS		Geochemistry of rock samples from the National Geochemical Database: U.S. Geological Survey, Reston, VA.	U.S. Geological Survey	USGS		41.2067	-114.916	0.01	55	55	55	ES	SEDIMENTARY	UNKNOWN	UNKNOWN	DOLOMITE																							0.05	300			10
D336599		USGS		Geochemistry of rock samples from the National Geochemical Database: U.S. Geological Survey, Reston, VA.	U.S. Geological Survey	USGS		41.2067	-114.916	0.01	55	55	55	ICPAES	SEDIMENTARY	UNKNOWN	UNKNOWN	DOLOMITE																											6.3	0.033	6.5	2.1
D336600		USGS		Geochemistry of rock samples from the National Geochemical Database: U.S. Geological Survey, Reston, VA.	U.S. Geological Survey	USGS		41.2067	-114.916	0.01	55	55	55	AAS	SEDIMENTARY	UNKNOWN	UNKNOWN	DOLOMITE
D336600		USGS		Geochemistry of rock samples from the National Geochemical Database: U.S. Geological Survey, Reston, VA.	U.S. Geological Survey	USGS		41.2067	-114.916	0.01	55	55	55	ES	SEDIMENTARY	UNKNOWN	UNKNOWN	DOLOMITE																							1	200			5
D336600		USGS		Geochemistry of rock samples from the National Geochemical Database: U.S. Geological Survey, Reston, VA.	U.S. Geological Survey	USGS		41.2067	-114.916	0.01	55	55	55	ICPAES	SEDIMENTARY	UNKNOWN	UNKNOWN	DOLOMITE																											3.2	0.067	4.8	40
D336602		USGS		Geochemistry of rock samples from the National Geochemical Database: U.S. Geological Survey, Reston, VA.	U.S. Geological Survey	USGS		41.2067	-114.916	0.01	55	55	55	AAS	SEDIMENTARY	UNKNOWN	UNKNOWN	DOLOMITE
D336602		USGS		Geochemistry of rock samples from the National Geochemical Database: U.S. Geological Survey, Reston, VA.	U.S. Geological Survey	USGS		41.2067	-114.916	0.01	55	55	55	ES	SEDIMENTARY	UNKNOWN	UNKNOWN	DOLOMITE																							0.07	150
D336602		USGS		Geochemistry of rock samples from the National Geochemical Database: U.S. Geological Survey, Reston, VA.	U.S. Geological Survey	USGS		41.2067	-114.916	0.01	55	55	55	ICPAES	SEDIMENTARY	UNKNOWN	UNKNOWN	DOLOMITE																											4	0.071	11	4.8
D347112		USGS		Geochemistry of rock samples from the National Geochemical Database: U.S. Geological Survey, Reston, VA.	U.S. Geological Survey	USGS		39.0003	-119.348	0.01				AAS	SEDIMENTARY	UNKNOWN	UNKNOWN	DOLOMITE
D347112		USGS		Geochemistry of rock samples from the National Geochemical Database: U.S. Geological Survey, Reston, VA.	U.S. Geological Survey	USGS		39.0003	-119.348	0.01				ES	SEDIMENTARY	UNKNOWN	UNKNOWN	DOLOMITE																							0.15	700			5				1.5
D347112		USGS		Geochemistry of rock samples from the National Geochemical Database: U.S. Geological Survey, Reston, VA.	U.S. Geological Survey	USGS		39.0003	-119.348	0.01				ICPAES	SEDIMENTARY	UNKNOWN	UNKNOWN	DOLOMITE																											1.4	0.064	34	2.9	0.071
D376451		USGS		Geochemistry of rock samples from the National Geochemical Database: U.S. Geological Survey, Reston, VA.	U.S. Geological Survey	USGS		27.6667	106.833	0.01	72	72	72	AAS	SEDIMENTARY	UNKNOWN	UNKNOWN	DOLOMITE
D376451		USGS		Geochemistry of rock samples from the National Geochemical Database: U.S. Geological Survey, Reston, VA.	U.S. Geological Survey	USGS		27.6667	106.833	0.01	72	72	72	ICPAES	SEDIMENTARY	UNKNOWN	UNKNOWN	DOLOMITE																							0.07	220		2	3
D376451		USGS		Geochemistry of rock samples from the National Geochemical Database: U.S. Geological Survey, Reston, VA.	U.S. Geological Survey	USGS		27.6667	106.833	0.01	72	72	72	MISC	SEDIMENTARY	UNKNOWN	UNKNOWN	DOLOMITE																	45.1
D376451		USGS		Geochemistry of rock samples from the National Geochemical Database: U.S. Geological Survey, Reston, VA.	U.S. Geological Survey	USGS		27.6667	106.833	0.01	72	72	72	MS	SEDIMENTARY	UNKNOWN	UNKNOWN	DOLOMITE
D376451		USGS		Geochemistry of rock samples from the National Geochemical Database: U.S. Geological Survey, Reston, VA.	U.S. Geological Survey	USGS		27.6667	106.833	0.01	72	72	72	XRF	SEDIMENTARY	UNKNOWN	UNKNOWN	DOLOMITE		0.68									21.8	31.5			0.03	0.12
D376456		USGS		Geochemistry of rock samples from the National Geochemical Database: U.S. Geological Survey, Reston, VA.	U.S. Geological Survey	USGS		29.1667	110.5	0.01	72	72	72	AAS	SEDIMENTARY	UNKNOWN	UNKNOWN	DOLOMITE
D376456		USGS		Geochemistry of rock samples from the National Geochemical Database: U.S. Geological Survey, Reston, VA.	U.S. Geological Survey	USGS		29.1667	110.5	0.01	72	72	72	FAP	SEDIMENTARY	UNKNOWN	UNKNOWN	DOLOMITE
D376456		USGS		Geochemistry of rock samples from the National Geochemical Database: U.S. Geological Survey, Reston, VA.	U.S. Geological Survey	USGS		29.1667	110.5	0.01	72	72	72	ICPAES	SEDIMENTARY	UNKNOWN	UNKNOWN	DOLOMITE																							0.88	330	20	7	10			20
D376456		USGS		Geochemistry of rock samples from the National Geochemical Database: U.S. Geological Survey, Reston, VA.	U.S. Geological Survey	USGS		29.1667	110.5	0.01	72	72	72	MISC	SEDIMENTARY	UNKNOWN	UNKNOWN	DOLOMITE																	39.2
D376456		USGS		Geochemistry of rock samples from the National Geochemical Database: U.S. Geological Survey, Reston, VA.	U.S. Geological Survey	USGS		29.1667	110.5	0.01	72	72	72	MS	SEDIMENTARY	UNKNOWN	UNKNOWN	DOLOMITE
D376456		USGS		Geochemistry of rock samples from the National Geochemical Database: U.S. Geological Survey, Reston, VA.	U.S. Geological Survey	USGS		29.1667	110.5	0.01	72	72	72	XRF	SEDIMENTARY	UNKNOWN	UNKNOWN	DOLOMITE		12.4	0.08	1.51						0.03	18.2	26.5			0.58
D376459		USGS		Geochemistry of rock samples from the National Geochemical Database: U.S. Geological Survey, Reston, VA.	U.S. Geological Survey	USGS		29.1667	110.5	0.01	72	72	72	AAS	SEDIMENTARY	UNKNOWN	UNKNOWN	DOLOMITE
D376459		USGS		Geochemistry of rock samples from the National Geochemical Database: U.S. Geological Survey, Reston, VA.	U.S. Geological Survey	USGS		29.1667	110.5	0.01	72	72	72	FAP	SEDIMENTARY	UNKNOWN	UNKNOWN	DOLOMITE
D376459		USGS		Geochemistry of rock samples from the National Geochemical Database: U.S. Geological Survey, Reston, VA.	U.S. Geological Survey	USGS		29.1667	110.5	0.01	72	72	72	ICPAES	SEDIMENTARY	UNKNOWN	UNKNOWN	DOLOMITE																							0.36	220	25	3	34	9	140	30
D376459		USGS		Geochemistry of rock samples from the National Geochemical Database: U.S. Geological Survey, Reston, VA.	U.S. Geological Survey	USGS		29.1667	110.5	0.01	72	72	72	MISC	SEDIMENTARY	UNKNOWN	UNKNOWN	DOLOMITE
D376459		USGS		Geochemistry of rock samples from the National Geochemical Database: U.S. Geological Survey, Reston, VA.	U.S. Geological Survey	USGS		29.1667	110.5	0.01	72	72	72	MS	SEDIMENTARY	UNKNOWN	UNKNOWN	DOLOMITE
D376470		USGS		Geochemistry of rock samples from the National Geochemical Database: U.S. Geological Survey, Reston, VA.	U.S. Geological Survey	USGS		29.1667	110.5	0.01	72	72	72	AAS	SEDIMENTARY	UNKNOWN	UNKNOWN	DOLOMITE
D376470		USGS		Geochemistry of rock samples from the National Geochemical Database: U.S. Geological Survey, Reston, VA.	U.S. Geological Survey	USGS		29.1667	110.5	0.01	72	72	72	FAP	SEDIMENTARY	UNKNOWN	UNKNOWN	DOLOMITE
D376470		USGS		Geochemistry of rock samples from the National Geochemical Database: U.S. Geological Survey, Reston, VA.	U.S. Geological Survey	USGS		29.1667	110.5	0.01	72	72	72	ICPAES	SEDIMENTARY	UNKNOWN	UNKNOWN	DOLOMITE																							2.1	140	5100		200	9	560	3500
D376470		USGS		Geochemistry of rock samples from the National Geochemical Database: U.S. Geological Survey, Reston, VA.	U.S. Geological Survey	USGS		29.1667	110.5	0.01	72	72	72	MISC	SEDIMENTARY	UNKNOWN	UNKNOWN	DOLOMITE
D376470		USGS		Geochemistry of rock samples from the National Geochemical Database: U.S. Geological Survey, Reston, VA.	U.S. Geological Survey	USGS		29.1667	110.5	0.01	72	72	72	MS	SEDIMENTARY	UNKNOWN	UNKNOWN	DOLOMITE
D376994		USGS		Geochemistry of rock samples from the National Geochemical Database: U.S. Geological Survey, Reston, VA.	U.S. Geological Survey	USGS		39.1417	-106.183	0.01	68	68	68	ICPAES	SEDIMENTARY	UNKNOWN	UNKNOWN	DOLOMITE																							0.55	430		4	58	20	8700	40	20
D376995		USGS		Geochemistry of rock samples from the National Geochemical Database: U.S. Geological Survey, Reston, VA.	U.S. Geological Survey	USGS		39.1417	-106.183	0.01	68	68	68	ICPAES	SEDIMENTARY	UNKNOWN	UNKNOWN	DOLOMITE																							0.2	290		4	6		1100
D376996		USGS		Geochemistry of rock samples from the National Geochemical Database: U.S. Geological Survey, Reston, VA.	U.S. Geological Survey	USGS		39.225	-106.183	0.01	68	68	68	ICPAES	SEDIMENTARY	UNKNOWN	UNKNOWN	DOLOMITE																							0.3	390			9		30
D389639		USGS		Geochemistry of rock samples from the National Geochemical Database: U.S. Geological Survey, Reston, VA.	U.S. Geological Survey	USGS		57.8475	-134.381	0.01	43	43	43	ICPAES	SEDIMENTARY	UNKNOWN	UNKNOWN	DOLOMITE																							2.6	700	48	8	1.4		2.1
D389670		USGS		Geochemistry of rock samples from the National Geochemical Database: U.S. Geological Survey, Reston, VA.	U.S. Geological Survey	USGS		57.8389	-134.386	0.01	43	43	43	AAS	SEDIMENTARY	UNKNOWN	UNKNOWN	DOLOMITE
D389670		USGS		Geochemistry of rock samples from the National Geochemical Database: U.S. Geological Survey, Reston, VA.	U.S. Geological Survey	USGS		57.8389	-134.386	0.01	43	43	43	ICPAES	SEDIMENTARY	UNKNOWN	UNKNOWN	DOLOMITE																							0.8	1000	20	2	1.2	0.056	5.4
D392849		USGS		Geochemistry of rock samples from the National Geochemical Database: U.S. Geological Survey, Reston, VA.	U.S. Geological Survey	USGS		37.5067	-109.5	0.01	70	70	70	ICPAES	SEDIMENTARY	UNKNOWN	UNKNOWN	DOLOMITE																							0.87	250	14	4	2		7
D392871		USGS		Geochemistry of rock samples from the National Geochemical Database: U.S. Geological Survey, Reston, VA.	U.S. Geological Survey	USGS		37.6103	-109.178	0.01	70	70	70	ICPAES	SEDIMENTARY	UNKNOWN	UNKNOWN	DOLOMITE																							2.7	160	87	9	34		47
D392872		USGS		Geochemistry of rock samples from the National Geochemical Database: U.S. Geological Survey, Reston, VA.	U.S. Geological Survey	USGS		37.6103	-109.178	0.01	70	70	70	ICPAES	SEDIMENTARY	UNKNOWN	UNKNOWN	DOLOMITE																							2.9	160	110	10	40		280	10
D392901		USGS		Geochemistry of rock samples from the National Geochemical Database: U.S. Geological Survey, Reston, VA.	U.S. Geological Survey	USGS		37.6103	-109.178	0.01	70	70	70	ICPAES	SEDIMENTARY	UNKNOWN	UNKNOWN	DOLOMITE																							3.1	170	110	10	42	2	300	10
D397401		USGS		Geochemistry of rock samples from the National Geochemical Database: U.S. Geological Survey, Reston, VA.	U.S. Geological Survey	USGS		36.7483	-112.301	0.01	71	71	71	DNAA	SEDIMENTARY	UNKNOWN	UNKNOWN	DOLOMITE
D397401		USGS		Geochemistry of rock samples from the National Geochemical Database: U.S. Geological Survey, Reston, VA.	U.S. Geological Survey	USGS		36.7483	-112.301	0.01	71	71	71	ICPAES	SEDIMENTARY	UNKNOWN	UNKNOWN	DOLOMITE																							0.17	60	7	2	0.94	0.073	15
D525607		USGS		Geochemistry of rock samples from the National Geochemical Database: U.S. Geological Survey, Reston, VA.	U.S. Geological Survey	USGS		50.5833	19.3278	0.01	59	59	59	AAS	SEDIMENTARY	UNKNOWN	UNKNOWN	DOLOMITE
D525607		USGS		Geochemistry of rock samples from the National Geochemical Database: U.S. Geological Survey, Reston, VA.	U.S. Geological Survey	USGS		50.5833	19.3278	0.01	59	59	59	ICPAES	SEDIMENTARY	UNKNOWN	UNKNOWN	DOLOMITE																							1.3	1800	13	12	380	1.2	230	12	1.2
D525607		USGS		Geochemistry of rock samples from the National Geochemical Database: U.S. Geological Survey, Reston, VA.	U.S. Geological Survey	USGS		50.5833	19.3278	0.01	59	59	59	MISC	SEDIMENTARY	UNKNOWN	UNKNOWN	DOLOMITE																	35
D525607		USGS		Geochemistry of rock samples from the National Geochemical Database: U.S. Geological Survey, Reston, VA.	U.S. Geological Survey	USGS		50.5833	19.3278	0.01	59	59	59	XRF	SEDIMENTARY	UNKNOWN	UNKNOWN	DOLOMITE		17.1	0.19	4.74						0.22	15.2	22.4			1.65	0.07
D525627		USGS		Geochemistry of rock samples from the National Geochemical Database: U.S. Geological Survey, Reston, VA.	U.S. Geological Survey	USGS		50.5833	19.3278	0.01	59	59	59	AAS	SEDIMENTARY	UNKNOWN	UNKNOWN	DOLOMITE
D525627		USGS		Geochemistry of rock samples from the National Geochemical Database: U.S. Geological Survey, Reston, VA.	U.S. Geological Survey	USGS		50.5833	19.3278	0.01	59	59	59	ICPAES	SEDIMENTARY	UNKNOWN	UNKNOWN	DOLOMITE																							0.42	1100		2	7.3	0.14	84	1.4
D525627		USGS		Geochemistry of rock samples from the National Geochemical Database: U.S. Geological Survey, Reston, VA.	U.S. Geological Survey	USGS		50.5833	19.3278	0.01	59	59	59	MISC	SEDIMENTARY	UNKNOWN	UNKNOWN	DOLOMITE																	45.8
D525627		USGS		Geochemistry of rock samples from the National Geochemical Database: U.S. Geological Survey, Reston, VA.	U.S. Geological Survey	USGS		50.5833	19.3278	0.01	59	59	59	XRF	SEDIMENTARY	UNKNOWN	UNKNOWN	DOLOMITE		2.07	0.02	0.51						0.14	20.6	30.1			0.1
D525650		USGS		Geochemistry of rock samples from the National Geochemical Database: U.S. Geological Survey, Reston, VA.	U.S. Geological Survey	USGS		50.5833	19.3278	0.01	59	59	59	AAS	SEDIMENTARY	UNKNOWN	UNKNOWN	DOLOMITE
D525650		USGS		Geochemistry of rock samples from the National Geochemical Database: U.S. Geological Survey, Reston, VA.	U.S. Geological Survey	USGS		50.5833	19.3278	0.01	59	59	59	ICPAES	SEDIMENTARY	UNKNOWN	UNKNOWN	DOLOMITE																							0.51	1000		2	3.4	0.14	84
D525650		USGS		Geochemistry of rock samples from the National Geochemical Database: U.S. Geological Survey, Reston, VA.	U.S. Geological Survey	USGS		50.5833	19.3278	0.01	59	59	59	MISC	SEDIMENTARY	UNKNOWN	UNKNOWN	DOLOMITE																	46.5
D525650		USGS		Geochemistry of rock samples from the National Geochemical Database: U.S. Geological Survey, Reston, VA.	U.S. Geological Survey	USGS		50.5833	19.3278	0.01	59	59	59	XRF	SEDIMENTARY	UNKNOWN	UNKNOWN	DOLOMITE		0.87		0.17						0.13	20.9	30.4			0.04
D527200		USGS		Geochemistry of rock samples from the National Geochemical Database: U.S. Geological Survey, Reston, VA.	U.S. Geological Survey	USGS		38.1833	-109.617	0.01	70	70	70	ICPAES	SEDIMENTARY	UNKNOWN	UNKNOWN	DOLOMITE																							0.92	260	17	5	5		9
D527201		USGS		Geochemistry of rock samples from the National Geochemical Database: U.S. Geological Survey, Reston, VA.	U.S. Geological Survey	USGS		38.1833	-109.617	0.01	70	70	70	ICPAES	SEDIMENTARY	UNKNOWN	UNKNOWN	DOLOMITE																							0.71	240	17	4	7		7
D527217		USGS		Geochemistry of rock samples from the National Geochemical Database: U.S. Geological Survey, Reston, VA.	U.S. Geological Survey	USGS		38.1833	-109.617	0.01	70	70	70	ICPAES	SEDIMENTARY	UNKNOWN	UNKNOWN	DOLOMITE																							0.61	310	7	2	2		3
D528000		USGS		Geochemistry of rock samples from the National Geochemical Database: U.S. Geological Survey, Reston, VA.	U.S. Geological Survey	USGS		-13.4953	-76.7981	0.01	6	6	6	ICPAES	SEDIMENTARY	UNKNOWN	UNKNOWN	DOLOMITE																							2.2	350	8	12	16		43	27
D528000		USGS		Geochemistry of rock samples from the National Geochemical Database: U.S. Geological Survey, Reston, VA.	U.S. Geological Survey	USGS		-13.4953	-76.7981	0.01	6	6	6	MISC	SEDIMENTARY	UNKNOWN	UNKNOWN	DOLOMITE																	17
D528000		USGS		Geochemistry of rock samples from the National Geochemical Database: U.S. Geological Survey, Reston, VA.	U.S. Geological Survey	USGS		-13.4953	-76.7981	0.01	6	6	6	XRF	SEDIMENTARY	UNKNOWN	UNKNOWN	DOLOMITE		41.4	0.41	9.44						0.05	7.7	13.4		2.45	1.55	0.58
D528001		USGS		Geochemistry of rock samples from the National Geochemical Database: U.S. Geological Survey, Reston, VA.	U.S. Geological Survey	USGS		-13.4953	-76.7981	0.01	6	6	6	ICPAES	SEDIMENTARY	UNKNOWN	UNKNOWN	DOLOMITE																							2.4	230	37	30	17	16	44	55
D528001		USGS		Geochemistry of rock samples from the National Geochemical Database: U.S. Geological Survey, Reston, VA.	U.S. Geological Survey	USGS		-13.4953	-76.7981	0.01	6	6	6	MISC	SEDIMENTARY	UNKNOWN	UNKNOWN	DOLOMITE																	19.4
D528001		USGS		Geochemistry of rock samples from the National Geochemical Database: U.S. Geological Survey, Reston, VA.	U.S. Geological Survey	USGS		-13.4953	-76.7981	0.01	6	6	6	XRF	SEDIMENTARY	UNKNOWN	UNKNOWN	DOLOMITE		26.6	0.32	6.31						0.03	7.83	21.8		1.97	1.03	6.61
D528005		USGS		Geochemistry of rock samples from the National Geochemical Database: U.S. Geological Survey, Reston, VA.	U.S. Geological Survey	USGS		-13.5111	-76.9081	0.01	6	6	6	ICPAES	SEDIMENTARY	UNKNOWN	UNKNOWN	DOLOMITE																							1.8	190	17	43	18		29
D528005		USGS		Geochemistry of rock samples from the National Geochemical Database: U.S. Geological Survey, Reston, VA.	U.S. Geological Survey	USGS		-13.5111	-76.9081	0.01	6	6	6	MISC	SEDIMENTARY	UNKNOWN	UNKNOWN	DOLOMITE																	25.3
D528005		USGS		Geochemistry of rock samples from the National Geochemical Database: U.S. Geological Survey, Reston, VA.	U.S. Geological Survey	USGS		-13.5111	-76.9081	0.01	6	6	6	XRF	SEDIMENTARY	UNKNOWN	UNKNOWN	DOLOMITE		30	0.28	6.71						0.03	9.92	18.7		1.77	1.04	1.86
D557617		USGS		Geochemistry of rock samples from the National Geochemical Database: U.S. Geological Survey, Reston, VA.	U.S. Geological Survey	USGS		50.5833	19.3278	0.01	59	59	59	AAS	SEDIMENTARY	UNKNOWN	UNKNOWN	DOLOMITE
D557617		USGS		Geochemistry of rock samples from the National Geochemical Database: U.S. Geological Survey, Reston, VA.	U.S. Geological Survey	USGS		50.5833	19.3278	0.01	59	59	59	ICPAES	SEDIMENTARY	UNKNOWN	UNKNOWN	DOLOMITE																							0.39	1000		1	0.53	0.22	120	1.2	0.095
D557617		USGS		Geochemistry of rock samples from the National Geochemical Database: U.S. Geological Survey, Reston, VA.	U.S. Geological Survey	USGS		50.5833	19.3278	0.01	59	59	59	MISC	SEDIMENTARY	UNKNOWN	UNKNOWN	DOLOMITE																	47.3
D557617		USGS		Geochemistry of rock samples from the National Geochemical Database: U.S. Geological Survey, Reston, VA.	U.S. Geological Survey	USGS		50.5833	19.3278	0.01	59	59	59	XRF	SEDIMENTARY	UNKNOWN	UNKNOWN	DOLOMITE		0.35		0.11						0.12	20.7	30
D557619		USGS		Geochemistry of rock samples from the National Geochemical Database: U.S. Geological Survey, Reston, VA.	U.S. Geological Survey	USGS		50.5833	19.3278	0.01	59	59	59	AAS	SEDIMENTARY	UNKNOWN	UNKNOWN	DOLOMITE
D557619		USGS		Geochemistry of rock samples from the National Geochemical Database: U.S. Geological Survey, Reston, VA.	U.S. Geological Survey	USGS		50.5833	19.3278	0.01	59	59	59	ICPAES	SEDIMENTARY	UNKNOWN	UNKNOWN	DOLOMITE																							0.48	1400		2	1	0.089	97	2.5	0.21
D557619		USGS		Geochemistry of rock samples from the National Geochemical Database: U.S. Geological Survey, Reston, VA.	U.S. Geological Survey	USGS		50.5833	19.3278	0.01	59	59	59	MISC	SEDIMENTARY	UNKNOWN	UNKNOWN	DOLOMITE																	46.7
D557619		USGS		Geochemistry of rock samples from the National Geochemical Database: U.S. Geological Survey, Reston, VA.	U.S. Geological Survey	USGS		50.5833	19.3278	0.01	59	59	59	XRF	SEDIMENTARY	UNKNOWN	UNKNOWN	DOLOMITE		0.99		0.12						0.16	20.6	30
D557620		USGS		Geochemistry of rock samples from the National Geochemical Database: U.S. Geological Survey, Reston, VA.	U.S. Geological Survey	USGS		50.5833	19.3278	0.01	59	59	59	AAS	SEDIMENTARY	UNKNOWN	UNKNOWN	DOLOMITE
D557620		USGS		Geochemistry of rock samples from the National Geochemical Database: U.S. Geological Survey, Reston, VA.	U.S. Geological Survey	USGS		50.5833	19.3278	0.01	59	59	59	ICPAES	SEDIMENTARY	UNKNOWN	UNKNOWN	DOLOMITE																							0.44	900		2	0.46		91
D557620		USGS		Geochemistry of rock samples from the National Geochemical Database: U.S. Geological Survey, Reston, VA.	U.S. Geological Survey	USGS		50.5833	19.3278	0.01	59	59	59	MISC	SEDIMENTARY	UNKNOWN	UNKNOWN	DOLOMITE																	46.2
D557620		USGS		Geochemistry of rock samples from the National Geochemical Database: U.S. Geological Survey, Reston, VA.	U.S. Geological Survey	USGS		50.5833	19.3278	0.01	59	59	59	XRF	SEDIMENTARY	UNKNOWN	UNKNOWN	DOLOMITE		1.15		0.31						0.1	20.5	30.4			0.04
D557621		USGS		Geochemistry of rock samples from the National Geochemical Database: U.S. Geological Survey, Reston, VA.	U.S. Geological Survey	USGS		50.5833	19.3278	0.01	59	59	59	AAS	SEDIMENTARY	UNKNOWN	UNKNOWN	DOLOMITE
D557621		USGS		Geochemistry of rock samples from the National Geochemical Database: U.S. Geological Survey, Reston, VA.	U.S. Geological Survey	USGS		50.5833	19.3278	0.01	59	59	59	ICPAES	SEDIMENTARY	UNKNOWN	UNKNOWN	DOLOMITE																							0.35	910		2	1.2		54	1.2
D557621		USGS		Geochemistry of rock samples from the National Geochemical Database: U.S. Geological Survey, Reston, VA.	U.S. Geological Survey	USGS		50.5833	19.3278	0.01	59	59	59	MISC	SEDIMENTARY	UNKNOWN	UNKNOWN	DOLOMITE																	47.2
D557621		USGS		Geochemistry of rock samples from the National Geochemical Database: U.S. Geological Survey, Reston, VA.	U.S. Geological Survey	USGS		50.5833	19.3278	0.01	59	59	59	XRF	SEDIMENTARY	UNKNOWN	UNKNOWN	DOLOMITE		0.37		0.12						0.1	20.8	30
D557623		USGS		Geochemistry of rock samples from the National Geochemical Database: U.S. Geological Survey, Reston, VA.	U.S. Geological Survey	USGS		50.5833	19.3278	0.01	59	59	59	ICPAES	SEDIMENTARY	UNKNOWN	UNKNOWN	DOLOMITE																							0.38	450	3	4	8.5		54	1.1
D557623		USGS		Geochemistry of rock samples from the National Geochemical Database: U.S. Geological Survey, Reston, VA.	U.S. Geological Survey	USGS		50.5833	19.3278	0.01	59	59	59	MISC	SEDIMENTARY	UNKNOWN	UNKNOWN	DOLOMITE																	46.3
D557623		USGS		Geochemistry of rock samples from the National Geochemical Database: U.S. Geological Survey, Reston, VA.	U.S. Geological Survey	USGS		50.5833	19.3278	0.01	59	59	59	XRF	SEDIMENTARY	UNKNOWN	UNKNOWN	DOLOMITE		1.45		0.33						0.05	20.6	29.9			0.05
D557625		USGS		Geochemistry of rock samples from the National Geochemical Database: U.S. Geological Survey, Reston, VA.	U.S. Geological Survey	USGS		50.5833	19.3278	0.01	59	59	59	AAS	SEDIMENTARY	UNKNOWN	UNKNOWN	DOLOMITE
D557625		USGS		Geochemistry of rock samples from the National Geochemical Database: U.S. Geological Survey, Reston, VA.	U.S. Geological Survey	USGS		50.5833	19.3278	0.01	59	59	59	ICPAES	SEDIMENTARY	UNKNOWN	UNKNOWN	DOLOMITE																							0.85	1100	8	4	6.9	1.5	210	11	0.093
D557625		USGS		Geochemistry of rock samples from the National Geochemical Database: U.S. Geological Survey, Reston, VA.	U.S. Geological Survey	USGS		50.5833	19.3278	0.01	59	59	59	MISC	SEDIMENTARY	UNKNOWN	UNKNOWN	DOLOMITE																	40.2
D557625		USGS		Geochemistry of rock samples from the National Geochemical Database: U.S. Geological Survey, Reston, VA.	U.S. Geological Survey	USGS		50.5833	19.3278	0.01	59	59	59	XRF	SEDIMENTARY	UNKNOWN	UNKNOWN	DOLOMITE		9.62	0.09	2.38						0.12	17.7	26			0.86
D557626		USGS		Geochemistry of rock samples from the National Geochemical Database: U.S. Geological Survey, Reston, VA.	U.S. Geological Survey	USGS		50.5833	19.3278	0.01	59	59	59	AAS	SEDIMENTARY	UNKNOWN	UNKNOWN	DOLOMITE
D557626		USGS		Geochemistry of rock samples from the National Geochemical Database: U.S. Geological Survey, Reston, VA.	U.S. Geological Survey	USGS		50.5833	19.3278	0.01	59	59	59	ICPAES	SEDIMENTARY	UNKNOWN	UNKNOWN	DOLOMITE																							0.75	1400	6	3	4.7	0.29	110	8.6
D557626		USGS		Geochemistry of rock samples from the National Geochemical Database: U.S. Geological Survey, Reston, VA.	U.S. Geological Survey	USGS		50.5833	19.3278	0.01	59	59	59	MISC	SEDIMENTARY	UNKNOWN	UNKNOWN	DOLOMITE																	43.7
D557626		USGS		Geochemistry of rock samples from the National Geochemical Database: U.S. Geological Survey, Reston, VA.	U.S. Geological Survey	USGS		50.5833	19.3278	0.01	59	59	59	XRF	SEDIMENTARY	UNKNOWN	UNKNOWN	DOLOMITE		4.63	0.05	1.16						0.16	18.4	29.6			0.35
D557627		USGS		Geochemistry of rock samples from the National Geochemical Database: U.S. Geological Survey, Reston, VA.	U.S. Geological Survey	USGS		50.5833	19.3278	0.01	59	59	59	AAS	SEDIMENTARY	UNKNOWN	UNKNOWN	DOLOMITE
D557627		USGS		Geochemistry of rock samples from the National Geochemical Database: U.S. Geological Survey, Reston, VA.	U.S. Geological Survey	USGS		50.5833	19.3278	0.01	59	59	59	ICPAES	SEDIMENTARY	UNKNOWN	UNKNOWN	DOLOMITE																							0.97	2100	11	4	10	6.5	620	9.6
D557627		USGS		Geochemistry of rock samples from the National Geochemical Database: U.S. Geological Survey, Reston, VA.	U.S. Geological Survey	USGS		50.5833	19.3278	0.01	59	59	59	MISC	SEDIMENTARY	UNKNOWN	UNKNOWN	DOLOMITE																	39.7
D557627		USGS		Geochemistry of rock samples from the National Geochemical Database: U.S. Geological Survey, Reston, VA.	U.S. Geological Survey	USGS		50.5833	19.3278	0.01	59	59	59	XRF	SEDIMENTARY	UNKNOWN	UNKNOWN	DOLOMITE		10.4	0.11	2.93						0.25	17.4	25.6			1.07	0.05
D557630		USGS		Geochemistry of rock samples from the National Geochemical Database: U.S. Geological Survey, Reston, VA.	U.S. Geological Survey	USGS		50.5833	19.3278	0.01	59	59	59	AAS	SEDIMENTARY	UNKNOWN	UNKNOWN	DOLOMITE
D557630		USGS		Geochemistry of rock samples from the National Geochemical Database: U.S. Geological Survey, Reston, VA.	U.S. Geological Survey	USGS		50.5833	19.3278	0.01	59	59	59	ICPAES	SEDIMENTARY	UNKNOWN	UNKNOWN	DOLOMITE																							0.52	1500	2	2	0.92	0.088	90	3.2	0.21
D557630		USGS		Geochemistry of rock samples from the National Geochemical Database: U.S. Geological Survey, Reston, VA.	U.S. Geological Survey	USGS		50.5833	19.3278	0.01	59	59	59	MISC	SEDIMENTARY	UNKNOWN	UNKNOWN	DOLOMITE																	47
D557630		USGS		Geochemistry of rock samples from the National Geochemical Database: U.S. Geological Survey, Reston, VA.	U.S. Geological Survey	USGS		50.5833	19.3278	0.01	59	59	59	XRF	SEDIMENTARY	UNKNOWN	UNKNOWN	DOLOMITE		0.61		0.15						0.17	20.7	30.2
D557634		USGS		Geochemistry of rock samples from the National Geochemical Database: U.S. Geological Survey, Reston, VA.	U.S. Geological Survey	USGS		50.5833	19.3278	0.01	59	59	59	AAS	SEDIMENTARY	UNKNOWN	UNKNOWN	DOLOMITE
D557634		USGS		Geochemistry of rock samples from the National Geochemical Database: U.S. Geological Survey, Reston, VA.	U.S. Geological Survey	USGS		50.5833	19.3278	0.01	59	59	59	ICPAES	SEDIMENTARY	UNKNOWN	UNKNOWN	DOLOMITE																							1.4	2100	3	2	0.66	1.8	380	4.6
D557634		USGS		Geochemistry of rock samples from the National Geochemical Database: U.S. Geological Survey, Reston, VA.	U.S. Geological Survey	USGS		50.5833	19.3278	0.01	59	59	59	MISC	SEDIMENTARY	UNKNOWN	UNKNOWN	DOLOMITE																	45.4
D557634		USGS		Geochemistry of rock samples from the National Geochemical Database: U.S. Geological Survey, Reston, VA.	U.S. Geological Survey	USGS		50.5833	19.3278	0.01	59	59	59	XRF	SEDIMENTARY	UNKNOWN	UNKNOWN	DOLOMITE		1.37		0.41						0.24	19.3	30.2			0.04
D557635		USGS		Geochemistry of rock samples from the National Geochemical Database: U.S. Geological Survey, Reston, VA.	U.S. Geological Survey	USGS		50.5833	19.3278	0.01	59	59	59	AAS	SEDIMENTARY	UNKNOWN	UNKNOWN	DOLOMITE
D557635		USGS		Geochemistry of rock samples from the National Geochemical Database: U.S. Geological Survey, Reston, VA.	U.S. Geological Survey	USGS		50.5833	19.3278	0.01	59	59	59	ICPAES	SEDIMENTARY	UNKNOWN	UNKNOWN	DOLOMITE																							1.2	1600	3	2	1.4	2.1	510	13	0.33
D557635		USGS		Geochemistry of rock samples from the National Geochemical Database: U.S. Geological Survey, Reston, VA.	U.S. Geological Survey	USGS		50.5833	19.3278	0.01	59	59	59	MISC	SEDIMENTARY	UNKNOWN	UNKNOWN	DOLOMITE																	45.2
D557635		USGS		Geochemistry of rock samples from the National Geochemical Database: U.S. Geological Survey, Reston, VA.	U.S. Geological Survey	USGS		50.5833	19.3278	0.01	59	59	59	XRF	SEDIMENTARY	UNKNOWN	UNKNOWN	DOLOMITE		0.89		0.25						0.18	19.7	30.4			0.02
D557636		USGS		Geochemistry of rock samples from the National Geochemical Database: U.S. Geological Survey, Reston, VA.	U.S. Geological Survey	USGS		50.5833	19.3278	0.01	59	59	59	AAS	SEDIMENTARY	UNKNOWN	UNKNOWN	DOLOMITE
D557636		USGS		Geochemistry of rock samples from the National Geochemical Database: U.S. Geological Survey, Reston, VA.	U.S. Geological Survey	USGS		50.5833	19.3278	0.01	59	59	59	ICPAES	SEDIMENTARY	UNKNOWN	UNKNOWN	DOLOMITE																							0.71	730	6	4	5.9	0.26	70	6.1
D557636		USGS		Geochemistry of rock samples from the National Geochemical Database: U.S. Geological Survey, Reston, VA.	U.S. Geological Survey	USGS		50.5833	19.3278	0.01	59	59	59	MISC	SEDIMENTARY	UNKNOWN	UNKNOWN	DOLOMITE																	41.6
D557636		USGS		Geochemistry of rock samples from the National Geochemical Database: U.S. Geological Survey, Reston, VA.	U.S. Geological Survey	USGS		50.5833	19.3278	0.01	59	59	59	XRF	SEDIMENTARY	UNKNOWN	UNKNOWN	DOLOMITE		7.38	0.08	1.92						0.09	18.2	27.3			0.69
D557637		USGS		Geochemistry of rock samples from the National Geochemical Database: U.S. Geological Survey, Reston, VA.	U.S. Geological Survey	USGS		50.5833	19.3278	0.01	59	59	59	AAS	SEDIMENTARY	UNKNOWN	UNKNOWN	DOLOMITE
D557637		USGS		Geochemistry of rock samples from the National Geochemical Database: U.S. Geological Survey, Reston, VA.	U.S. Geological Survey	USGS		50.5833	19.3278	0.01	59	59	59	ICPAES	SEDIMENTARY	UNKNOWN	UNKNOWN	DOLOMITE																							1.2	1400	4	2	0.89	0.65	220	8.9	0.19
[truncated: 636 more rows]
[truncated: 108 more columns]

## Sheet: References
References
[truncated: 147 more rows]
