# Supplementary material for: Basic chemical compositions combination rules and quantitative criterion of red beds
Source: Copernicus journal article supplement (doi:10.5194/egusphere-2023-2590), 2024-01-29
Supplement: Supplementary file 6 [file Supplementary Table 14-lignite_EarthChem.xlsx]

## Sheet: Data
EarthChem Download: Tuesday, Apr. 24, 2018 9:04:43 am
Search Criteria:
RockName	lignite
SAMPLE ID	IGSN	SOURCE	DOI	TITLE	JOURNAL	AUTHOR	CRUISEID	LATITUDE	LONGITUDE	LOC PREC	MIN AGE	AGE	MAX AGE	METHOD	MATERIAL	TYPE	COMPOSITION	ROCK NAME	SIO2	TIO2	AL2O3	FE2O3	FEO	MGO	CAO	NA2O	K2O	P2O5	MNO	LOI	AR40_AR36	AR37_AR40	quartz
D-9,002		GEOROC	10.1016/0012-821X(90)90109-B	CONSTRAINTS ON THE EVOLUTION OF THE JAPAN SEA BASED ON 40AR-39AR AGES AND SR ISOTOPIC RATIOS FOR VOLCANIC ROCKS OF THE YAMATO SEAMOUNT CHAIN IN THE JAPAN SEA	EARTH PLANET. SCI. LETT.	KANEOKA, I.; NOTSU, K.; TAKIGAMI, Y.; FUJIOKA, K.; SAKAI, H.	KH84-3 CRUISE	40.168	139.912	0.01				MS	IGNEOUS	VOLCANIC	UNKNOWN	LIGNITE													0.001851	0.01745
D-9,001 R		GEOROC	10.1016/0012-821X(90)90109-B	CONSTRAINTS ON THE EVOLUTION OF THE JAPAN SEA BASED ON 40AR-39AR AGES AND SR ISOTOPIC RATIOS FOR VOLCANIC ROCKS OF THE YAMATO SEAMOUNT CHAIN IN THE JAPAN SEA	EARTH PLANET. SCI. LETT.	KANEOKA, I.; NOTSU, K.; TAKIGAMI, Y.; FUJIOKA, K.; SAKAI, H.	KH84-3 CRUISE	40.168	139.912	0.01				NOT GIVEN	IGNEOUS	VOLCANIC	UNKNOWN	LIGNITE	5.41	0.77	2.55	2.13	0.21	0.14	0.55	0.13	0.13	0.13	0	87.66			26.2113
D-9,001 I		GEOROC	10.1016/0012-821X(90)90109-B	CONSTRAINTS ON THE EVOLUTION OF THE JAPAN SEA BASED ON 40AR-39AR AGES AND SR ISOTOPIC RATIOS FOR VOLCANIC ROCKS OF THE YAMATO SEAMOUNT CHAIN IN THE JAPAN SEA	EARTH PLANET. SCI. LETT.	KANEOKA, I.; NOTSU, K.; TAKIGAMI, Y.; FUJIOKA, K.; SAKAI, H.	KH84-3 CRUISE	40.168	139.912	0.01				NOT GIVEN	IGNEOUS	VOLCANIC	UNKNOWN	LIGNITE	43.4	1.45	20.63	0.77	0.42	0.45	0.59	0.92	1.26	0.18	0	29.72			45.322

## Sheet: References
References
AUTHOR	YEAR	TITLE	JOURNAL
KANEOKA, I.; NOTSU, K.; TAKIGAMI, Y.; FUJIOKA, K.; SAKAI, H.	1990	CONSTRAINTS ON THE EVOLUTION OF THE JAPAN SEA BASED ON 40AR-39AR AGES AND SR ISOTOPIC RATIOS FOR VOLCANIC ROCKS OF THE YAMATO SEAMOUNT CHAIN IN THE JAPAN SEA	EARTH PLANET. SCI. LETT.
