# Supplementary material for: Basic chemical compositions combination rules and quantitative criterion of red beds
Source: Copernicus journal article supplement (doi:10.5194/egusphere-2023-2590), 2024-01-29
Supplement: Supplementary file 7 [file Supplementary Table 15-limestone_EarthChem.xlsx]

## Sheet: Data
EarthChem Download: Wednesday, May. 10, 2023 7:23:22 am
Search Criteria:
Material	sedimentary
Rock Name	limestone
SAMPLE ID	IGSN	SOURCE	DOI	TITLE	JOURNAL	AUTHOR	CRUISEID	LATITUDE	LONGITUDE	LOC PREC	MIN AGE	AGE	MAX AGE	METHOD	MATERIAL	TYPE	COMPOSITION	ROCK NAME	MINERAL	SIO2	TIO2	AL2O3	CR2O3	FE2O3	FE2O3T	FEO	FEOT	MNO	MGO	CAO	SRO	NA2O	K2O	P2O5	BAO	LOI	H2O	H2O_M	H2O_P	SO3	V2O5	SI	FE	MN	NI	CO	CU	CD	ZN
MB-2		GEOROC	10.1007/BF00372365	CRUSTAL CONTRIBUTION TO ARC MAGMATISM IN THE ANDES OF CENTRAL CHILE	CONTRIB. MINERAL. PETROL.	HILDRETH, W.; MOORBATH, S.		-34.8	-71.5	0.1				TIMS	SEDIMENTARY			LIMESTONE
MB-2		GEOROC	10.1007/BF00372365	CRUSTAL CONTRIBUTION TO ARC MAGMATISM IN THE ANDES OF CENTRAL CHILE	CONTRIB. MINERAL. PETROL.	HILDRETH, W.; MOORBATH, S.		-34.8	-71.5	0.1				XRF	SEDIMENTARY			LIMESTONE
D2-3A		GEOROC	10.1016/0025-3227(88)90113-2	COBALT- AND PLATINUM-RICH FERROMANGANESE CRUSTS AND ASSOCIATED SUBSTRATE ROCKS FROM THE MARSHALL ISLANDS	MAR. GEOL.	HEIN, J. R.; SCHWAB, W. C.; DAVIS, A. S.		7.2358	171.004	0.0001				NOT	SEDIMENTARY			LIMESTONE																			0.7
D2-3A		GEOROC	10.1016/0025-3227(88)90113-2	COBALT- AND PLATINUM-RICH FERROMANGANESE CRUSTS AND ASSOCIATED SUBSTRATE ROCKS FROM THE MARSHALL ISLANDS	MAR. GEOL.	HEIN, J. R.; SCHWAB, W. C.; DAVIS, A. S.		7.2358	171.004	0.0001				XRF	SEDIMENTARY			LIMESTONE		0.49	0	0.16		0		0		0	1.52	52.7		0.31	0	0.06
D2-3A		GEOROC	10.1016/0025-3227(88)90113-2	COBALT- AND PLATINUM-RICH FERROMANGANESE CRUSTS AND ASSOCIATED SUBSTRATE ROCKS FROM THE MARSHALL ISLANDS	MAR. GEOL.	HEIN, J. R.; SCHWAB, W. C.; DAVIS, A. S.		7.2358	171.004	0.0001				IGN	SEDIMENTARY			LIMESTONE																		45
D2-3A		GEOROC	10.1016/0025-3227(88)90113-2	COBALT- AND PLATINUM-RICH FERROMANGANESE CRUSTS AND ASSOCIATED SUBSTRATE ROCKS FROM THE MARSHALL ISLANDS	MAR. GEOL.	HEIN, J. R.; SCHWAB, W. C.; DAVIS, A. S.		7.2358	171.004	0.0001				ICPMS	SEDIMENTARY			LIMESTONE																											0	0	0	0	158
D10-1B		GEOROC	10.1016/0025-3227(88)90113-2	COBALT- AND PLATINUM-RICH FERROMANGANESE CRUSTS AND ASSOCIATED SUBSTRATE ROCKS FROM THE MARSHALL ISLANDS	MAR. GEOL.	HEIN, J. R.; SCHWAB, W. C.; DAVIS, A. S.		10.0875	169.608	0.0001				ICPMS	SEDIMENTARY			LIMESTONE																											30	26	6	12	507
D10-1B		GEOROC	10.1016/0025-3227(88)90113-2	COBALT- AND PLATINUM-RICH FERROMANGANESE CRUSTS AND ASSOCIATED SUBSTRATE ROCKS FROM THE MARSHALL ISLANDS	MAR. GEOL.	HEIN, J. R.; SCHWAB, W. C.; DAVIS, A. S.		10.0875	169.608	0.0001				NOT	SEDIMENTARY			LIMESTONE																			0.11
D10-1B		GEOROC	10.1016/0025-3227(88)90113-2	COBALT- AND PLATINUM-RICH FERROMANGANESE CRUSTS AND ASSOCIATED SUBSTRATE ROCKS FROM THE MARSHALL ISLANDS	MAR. GEOL.	HEIN, J. R.; SCHWAB, W. C.; DAVIS, A. S.		10.0875	169.608	0.0001				XRF	SEDIMENTARY			LIMESTONE		1.07	0.05	0.36		0.073		0.06		0.03	0.93	54.5		0	0.02	0.15
D10-1B		GEOROC	10.1016/0025-3227(88)90113-2	COBALT- AND PLATINUM-RICH FERROMANGANESE CRUSTS AND ASSOCIATED SUBSTRATE ROCKS FROM THE MARSHALL ISLANDS	MAR. GEOL.	HEIN, J. R.; SCHWAB, W. C.; DAVIS, A. S.		10.0875	169.608	0.0001				IGN	SEDIMENTARY			LIMESTONE																		43.9
D15-4		GEOROC	10.1016/0025-3227(88)90113-2	COBALT- AND PLATINUM-RICH FERROMANGANESE CRUSTS AND ASSOCIATED SUBSTRATE ROCKS FROM THE MARSHALL ISLANDS	MAR. GEOL.	HEIN, J. R.; SCHWAB, W. C.; DAVIS, A. S.		12.1808	168.995	0.0001				XRF	SEDIMENTARY			LIMESTONE		2.61	0.32	0.86			2.18			1.57	0.71	47.3		1.1	0.09	26.1
D15-4		GEOROC	10.1016/0025-3227(88)90113-2	COBALT- AND PLATINUM-RICH FERROMANGANESE CRUSTS AND ASSOCIATED SUBSTRATE ROCKS FROM THE MARSHALL ISLANDS	MAR. GEOL.	HEIN, J. R.; SCHWAB, W. C.; DAVIS, A. S.		12.1808	168.995	0.0001				NOT	SEDIMENTARY			LIMESTONE																			2.23
D15-4		GEOROC	10.1016/0025-3227(88)90113-2	COBALT- AND PLATINUM-RICH FERROMANGANESE CRUSTS AND ASSOCIATED SUBSTRATE ROCKS FROM THE MARSHALL ISLANDS	MAR. GEOL.	HEIN, J. R.; SCHWAB, W. C.; DAVIS, A. S.		12.1808	168.995	0.0001				IGN	SEDIMENTARY			LIMESTONE																		13.4
D15-4		GEOROC	10.1016/0025-3227(88)90113-2	COBALT- AND PLATINUM-RICH FERROMANGANESE CRUSTS AND ASSOCIATED SUBSTRATE ROCKS FROM THE MARSHALL ISLANDS	MAR. GEOL.	HEIN, J. R.; SCHWAB, W. C.; DAVIS, A. S.		12.1808	168.995	0.0001				ICPMS	SEDIMENTARY			LIMESTONE																											829	445	212	0	240
D17-4		GEOROC	10.1016/0025-3227(88)90113-2	COBALT- AND PLATINUM-RICH FERROMANGANESE CRUSTS AND ASSOCIATED SUBSTRATE ROCKS FROM THE MARSHALL ISLANDS	MAR. GEOL.	HEIN, J. R.; SCHWAB, W. C.; DAVIS, A. S.		13.9041	167.632	0.0001				XRF	SEDIMENTARY			LIMESTONE		0.55	0.07	0.12			0.15			0.25	0.45	53.1		0.7	0	23.4
D17-4		GEOROC	10.1016/0025-3227(88)90113-2	COBALT- AND PLATINUM-RICH FERROMANGANESE CRUSTS AND ASSOCIATED SUBSTRATE ROCKS FROM THE MARSHALL ISLANDS	MAR. GEOL.	HEIN, J. R.; SCHWAB, W. C.; DAVIS, A. S.		13.9041	167.632	0.0001				NOT	SEDIMENTARY			LIMESTONE																			1.28
D17-4		GEOROC	10.1016/0025-3227(88)90113-2	COBALT- AND PLATINUM-RICH FERROMANGANESE CRUSTS AND ASSOCIATED SUBSTRATE ROCKS FROM THE MARSHALL ISLANDS	MAR. GEOL.	HEIN, J. R.; SCHWAB, W. C.; DAVIS, A. S.		13.9041	167.632	0.0001				IGN	SEDIMENTARY			LIMESTONE																		18.8
D17-4		GEOROC	10.1016/0025-3227(88)90113-2	COBALT- AND PLATINUM-RICH FERROMANGANESE CRUSTS AND ASSOCIATED SUBSTRATE ROCKS FROM THE MARSHALL ISLANDS	MAR. GEOL.	HEIN, J. R.; SCHWAB, W. C.; DAVIS, A. S.		13.9041	167.632	0.0001				ICPMS	SEDIMENTARY			LIMESTONE																											200	49	121	0	220
D18-3		GEOROC	10.1016/0025-3227(88)90113-2	COBALT- AND PLATINUM-RICH FERROMANGANESE CRUSTS AND ASSOCIATED SUBSTRATE ROCKS FROM THE MARSHALL ISLANDS	MAR. GEOL.	HEIN, J. R.; SCHWAB, W. C.; DAVIS, A. S.		13.9	167.653	0.0001				IGN	SEDIMENTARY			LIMESTONE																		17.1
D18-3		GEOROC	10.1016/0025-3227(88)90113-2	COBALT- AND PLATINUM-RICH FERROMANGANESE CRUSTS AND ASSOCIATED SUBSTRATE ROCKS FROM THE MARSHALL ISLANDS	MAR. GEOL.	HEIN, J. R.; SCHWAB, W. C.; DAVIS, A. S.		13.9	167.653	0.0001				XRF	SEDIMENTARY			LIMESTONE		8.84	0.59	3.85			3.45			0.92	0.75	42.4		1.21	0.51	18
D18-3		GEOROC	10.1016/0025-3227(88)90113-2	COBALT- AND PLATINUM-RICH FERROMANGANESE CRUSTS AND ASSOCIATED SUBSTRATE ROCKS FROM THE MARSHALL ISLANDS	MAR. GEOL.	HEIN, J. R.; SCHWAB, W. C.; DAVIS, A. S.		13.9	167.653	0.0001				NOT	SEDIMENTARY			LIMESTONE																			2.26
D18-3		GEOROC	10.1016/0025-3227(88)90113-2	COBALT- AND PLATINUM-RICH FERROMANGANESE CRUSTS AND ASSOCIATED SUBSTRATE ROCKS FROM THE MARSHALL ISLANDS	MAR. GEOL.	HEIN, J. R.; SCHWAB, W. C.; DAVIS, A. S.		13.9	167.653	0.0001				ICPMS	SEDIMENTARY			LIMESTONE																											269	86	152	0	119
D18-10B		GEOROC	10.1016/0025-3227(88)90113-2	COBALT- AND PLATINUM-RICH FERROMANGANESE CRUSTS AND ASSOCIATED SUBSTRATE ROCKS FROM THE MARSHALL ISLANDS	MAR. GEOL.	HEIN, J. R.; SCHWAB, W. C.; DAVIS, A. S.		13.9	167.653	0.0001				NOT	SEDIMENTARY			LIMESTONE
MP1		GEOROC	10.1029/GL015i008p00812	A SEARCH FOR IRIDIUM IN THE DECCAN TRAPS AND INTER-TRAPS	GEOPHYS. RES. LETT.	ROCCHIA, R.; WRIGHT, F. E.; COURTILLOT, V.; JAEGER, J. J.		22.1	74.17	0.01				NAA	SEDIMENTARY			LIMESTONE
G413		GEOROC		ALKALINE AND THOLEIITIC DYKE SWARM ASSOCIATED WITH AMBA DONGAR AND PHENAI MATA COMPLEXES, CHHOTA UDAIPUR, ALKALINE SUBPROVINCE, WESTERN INDIA	MEM. GEOL. SOC. INDIA	GWALANI, L. G.; FERNANDEZ, S.; KARANTH, R. V.		22	74.08	0.01				NOT	SEDIMENTARY			LIMESTONE		26.77	0	0.34		0		1.88		0.06	0.57	35.86		0.11	0.07	0.05		0.34									39		6		29.5
19-183-39-1,95-97		GEOROC	10.1016/S0009-2541(97)00150-2	THE CHEMICAL COMPOSITION OF SUBDUCTING SEDIMENT AND ITS CONSEQUENCES FOR THE CRUST AND MANTLE	CHEM. GEOL.	PLANK, T. A.; LANGMUIR, C. H.		52.5717	-161.206	0.0001				DCPAES	SEDIMENTARY			LIMESTONE		10.4	0.15	3.51					1.06	5.445	2.09	40.38		0.39	0.78	0.133		35.67									17.3		155.3		33
GAL1A S3		GEOROC	10.2113/gsecongeo.75.8.1200	GEOLOGY AND GEOCHEMISTRY OF THE LAS CUEVAS FLUORITE DEPOSIT, SAN LUIS POTOSI, MEXICO	ECON. GEOL.	RUIZ, J.; KESLER, S. R.; JONES, L. M.; SUTTER, J. F.		21.9	-100.2	0.1				NAA	SEDIMENTARY			LIMESTONE																										6.5
GAL1A S3		GEOROC	10.2113/gsecongeo.75.8.1200	GEOLOGY AND GEOCHEMISTRY OF THE LAS CUEVAS FLUORITE DEPOSIT, SAN LUIS POTOSI, MEXICO	ECON. GEOL.	RUIZ, J.; KESLER, S. R.; JONES, L. M.; SUTTER, J. F.		21.9	-100.2	0.1				NOT	SEDIMENTARY			LIMESTONE
GAL1A S4		GEOROC	10.2113/gsecongeo.75.8.1200	GEOLOGY AND GEOCHEMISTRY OF THE LAS CUEVAS FLUORITE DEPOSIT, SAN LUIS POTOSI, MEXICO	ECON. GEOL.	RUIZ, J.; KESLER, S. R.; JONES, L. M.; SUTTER, J. F.		21.9	-100.2	0.1				NAA	SEDIMENTARY			LIMESTONE																										6.8
GAL1A S1		GEOROC	10.2113/gsecongeo.75.8.1200	GEOLOGY AND GEOCHEMISTRY OF THE LAS CUEVAS FLUORITE DEPOSIT, SAN LUIS POTOSI, MEXICO	ECON. GEOL.	RUIZ, J.; KESLER, S. R.; JONES, L. M.; SUTTER, J. F.		21.9	-100.2	0.1				NAA	SEDIMENTARY			LIMESTONE																										13
GAL1A S1		GEOROC	10.2113/gsecongeo.75.8.1200	GEOLOGY AND GEOCHEMISTRY OF THE LAS CUEVAS FLUORITE DEPOSIT, SAN LUIS POTOSI, MEXICO	ECON. GEOL.	RUIZ, J.; KESLER, S. R.; JONES, L. M.; SUTTER, J. F.		21.9	-100.2	0.1				NOT	SEDIMENTARY			LIMESTONE
S2		GEOROC	10.2113/gsecongeo.75.8.1200	GEOLOGY AND GEOCHEMISTRY OF THE LAS CUEVAS FLUORITE DEPOSIT, SAN LUIS POTOSI, MEXICO	ECON. GEOL.	RUIZ, J.; KESLER, S. R.; JONES, L. M.; SUTTER, J. F.		21.9	-100.2	0.1				NOT	SEDIMENTARY			LIMESTONE
C1		GEOROC	10.2113/gsecongeo.75.8.1200	GEOLOGY AND GEOCHEMISTRY OF THE LAS CUEVAS FLUORITE DEPOSIT, SAN LUIS POTOSI, MEXICO	ECON. GEOL.	RUIZ, J.; KESLER, S. R.; JONES, L. M.; SUTTER, J. F.		21.9	-100.2	0.1				NOT	SEDIMENTARY			LIMESTONE
HP29		GEOROC	10.1016/S0024-4937(00)00062-1	GEOCHEMICAL AND SR-ND-PB ISOTOPIC EVIDENCE FOR A COMBINED ASSIMILATION AND FRACTIONAL CRYSTALLISATION PROCESS FOR VOLCANIC ROCKS FROM THE HUICHAPAN CALDERA, HIDALGO, MEXICO	LITHOS	VERMA, S. P.		20.4833	-99.5642	0.0001				HPLC	SEDIMENTARY			LIMESTONE
HP29		GEOROC	10.1016/S0024-4937(00)00062-1	GEOCHEMICAL AND SR-ND-PB ISOTOPIC EVIDENCE FOR A COMBINED ASSIMILATION AND FRACTIONAL CRYSTALLISATION PROCESS FOR VOLCANIC ROCKS FROM THE HUICHAPAN CALDERA, HIDALGO, MEXICO	LITHOS	VERMA, S. P.		20.4833	-99.5642	0.0001				XRF	SEDIMENTARY			LIMESTONE																											6	1	4		10
HP29		GEOROC	10.1016/S0024-4937(00)00062-1	GEOCHEMICAL AND SR-ND-PB ISOTOPIC EVIDENCE FOR A COMBINED ASSIMILATION AND FRACTIONAL CRYSTALLISATION PROCESS FOR VOLCANIC ROCKS FROM THE HUICHAPAN CALDERA, HIDALGO, MEXICO	LITHOS	VERMA, S. P.		20.4833	-99.5642	0.0001				MS	SEDIMENTARY			LIMESTONE
HP29		GEOROC	10.1016/S0024-4937(00)00062-1	GEOCHEMICAL AND SR-ND-PB ISOTOPIC EVIDENCE FOR A COMBINED ASSIMILATION AND FRACTIONAL CRYSTALLISATION PROCESS FOR VOLCANIC ROCKS FROM THE HUICHAPAN CALDERA, HIDALGO, MEXICO	LITHOS	VERMA, S. P.		20.4833	-99.5642	0.0001				MS	SEDIMENTARY			LIMESTONE
HP29		GEOROC	10.1016/S0024-4937(00)00062-1	GEOCHEMICAL AND SR-ND-PB ISOTOPIC EVIDENCE FOR A COMBINED ASSIMILATION AND FRACTIONAL CRYSTALLISATION PROCESS FOR VOLCANIC ROCKS FROM THE HUICHAPAN CALDERA, HIDALGO, MEXICO	LITHOS	VERMA, S. P.		20.4833	-99.5642	0.0001				MS	SEDIMENTARY			LIMESTONE
IGPC		GEOROC	10.1016/S0024-4937(01)00054-8	PETROLOGY OF MELILITE-BEARING ROCKS FROM THE MONTEFIASCONE VOLCANIC COMPLEX (ROMAN MAGMATIC PROVINCE): NEW INSIGHTS INTO THE ULTRAPOTASSIC VOLCANISM OF CENTRAL ITALY	LITHOS	DI BATTISTINI, G.; SAKAMOTO, M.; MONTANINI, A.; VENTURELLI, G.; TONARINI, S.		42.6	11.93	0.01				ICPMS	SEDIMENTARY			LIMESTONE		5.67	0.04	1.03			0.64			0.09	0.37	51.7		0.01	0.08												5.5	4.2
IGPC		GEOROC	10.1016/S0024-4937(01)00054-8	PETROLOGY OF MELILITE-BEARING ROCKS FROM THE MONTEFIASCONE VOLCANIC COMPLEX (ROMAN MAGMATIC PROVINCE): NEW INSIGHTS INTO THE ULTRAPOTASSIC VOLCANISM OF CENTRAL ITALY	LITHOS	DI BATTISTINI, G.; SAKAMOTO, M.; MONTANINI, A.; VENTURELLI, G.; TONARINI, S.		42.6	11.93	0.01				IGN	SEDIMENTARY			LIMESTONE																		40
IGPC		GEOROC	10.1016/S0024-4937(01)00054-8	PETROLOGY OF MELILITE-BEARING ROCKS FROM THE MONTEFIASCONE VOLCANIC COMPLEX (ROMAN MAGMATIC PROVINCE): NEW INSIGHTS INTO THE ULTRAPOTASSIC VOLCANISM OF CENTRAL ITALY	LITHOS	DI BATTISTINI, G.; SAKAMOTO, M.; MONTANINI, A.; VENTURELLI, G.; TONARINI, S.		42.6	11.93	0.01				TIMS	SEDIMENTARY			LIMESTONE
MR		GEOROC	10.1016/S0024-4937(01)00054-8	PETROLOGY OF MELILITE-BEARING ROCKS FROM THE MONTEFIASCONE VOLCANIC COMPLEX (ROMAN MAGMATIC PROVINCE): NEW INSIGHTS INTO THE ULTRAPOTASSIC VOLCANISM OF CENTRAL ITALY	LITHOS	DI BATTISTINI, G.; SAKAMOTO, M.; MONTANINI, A.; VENTURELLI, G.; TONARINI, S.		42.6	11.93	0.01				ICPMS	SEDIMENTARY			LIMESTONE		2.94	0.01	0.15			0.29			0.08	0.5	53.7		0.03														0.9
MR		GEOROC	10.1016/S0024-4937(01)00054-8	PETROLOGY OF MELILITE-BEARING ROCKS FROM THE MONTEFIASCONE VOLCANIC COMPLEX (ROMAN MAGMATIC PROVINCE): NEW INSIGHTS INTO THE ULTRAPOTASSIC VOLCANISM OF CENTRAL ITALY	LITHOS	DI BATTISTINI, G.; SAKAMOTO, M.; MONTANINI, A.; VENTURELLI, G.; TONARINI, S.		42.6	11.93	0.01				IGN	SEDIMENTARY			LIMESTONE																		42.01
MR		GEOROC	10.1016/S0024-4937(01)00054-8	PETROLOGY OF MELILITE-BEARING ROCKS FROM THE MONTEFIASCONE VOLCANIC COMPLEX (ROMAN MAGMATIC PROVINCE): NEW INSIGHTS INTO THE ULTRAPOTASSIC VOLCANISM OF CENTRAL ITALY	LITHOS	DI BATTISTINI, G.; SAKAMOTO, M.; MONTANINI, A.; VENTURELLI, G.; TONARINI, S.		42.6	11.93	0.01				TIMS	SEDIMENTARY			LIMESTONE
LAPALMA LIMESTONE		GEOROC	10.1007/BF01161501	SR ISOTOPIC EVIDENCE FOR A MULTI-SOURCE ORIGIN OF THE POTASSIC MAGMAS IN THE NEAPOLITAN AREA (S. ITALY)	CONTRIB. MINERAL. PETROL.	CORTINI, M.; HERMES, O. D.		40.821	14.426	0.001				TIMS	SEDIMENTARY			LIMESTONE
SK 44		GEOROC	10.1139/e03-076	TECTONIC SETTING OF OUTER TRENCH SLOPE VOLCANISM: PILLOW BASALT AND LIMESTONE IN THE TACONIAN OROGEN OF EASTERN NEW YORK	CAN. J. EARTH SCI.	LANDING, E.; PE-PIPER, G.; KIDD, W. S. F.; AZMY, K.		43.1186	-73.5877	0.0001				MS	SEDIMENTARY			LIMESTONE
SK 44B		GEOROC	10.1139/e03-076	TECTONIC SETTING OF OUTER TRENCH SLOPE VOLCANISM: PILLOW BASALT AND LIMESTONE IN THE TACONIAN OROGEN OF EASTERN NEW YORK	CAN. J. EARTH SCI.	LANDING, E.; PE-PIPER, G.; KIDD, W. S. F.; AZMY, K.		43.1186	-73.5877	0.0001				MS	SEDIMENTARY			LIMESTONE
SK 50		GEOROC	10.1139/e03-076	TECTONIC SETTING OF OUTER TRENCH SLOPE VOLCANISM: PILLOW BASALT AND LIMESTONE IN THE TACONIAN OROGEN OF EASTERN NEW YORK	CAN. J. EARTH SCI.	LANDING, E.; PE-PIPER, G.; KIDD, W. S. F.; AZMY, K.		43.1186	-73.5877	0.0001				MS	SEDIMENTARY			LIMESTONE
SK 51		GEOROC	10.1139/e03-076	TECTONIC SETTING OF OUTER TRENCH SLOPE VOLCANISM: PILLOW BASALT AND LIMESTONE IN THE TACONIAN OROGEN OF EASTERN NEW YORK	CAN. J. EARTH SCI.	LANDING, E.; PE-PIPER, G.; KIDD, W. S. F.; AZMY, K.		43.1186	-73.5877	0.0001				MS	SEDIMENTARY			LIMESTONE
SK 52		GEOROC	10.1139/e03-076	TECTONIC SETTING OF OUTER TRENCH SLOPE VOLCANISM: PILLOW BASALT AND LIMESTONE IN THE TACONIAN OROGEN OF EASTERN NEW YORK	CAN. J. EARTH SCI.	LANDING, E.; PE-PIPER, G.; KIDD, W. S. F.; AZMY, K.		43.1186	-73.5877	0.0001				MS	SEDIMENTARY			LIMESTONE
3-2		GEOROC		PRECAMBRIAN VOLCANISM AND SEDIMENTOGENESIS IN THE NORTH-EASTERN PART OF THE BALTIC SHIELD		PREDOVSKIY, A. A.; MELEZHIK, V. A.; BOLOTOV, V. I.; FEDOTOV, ZH. A.; BASALAEV, A. A.; KOZLOV, N. E.; IVANOV, A. A.		64.8	34	0.1				NOT	SEDIMENTARY			LIMESTONE		3.02	0.22	0.98		0.32		0.62		0.04	1.43	52.39		0.16	0.13	0.11											11
2-1		GEOROC		PRECAMBRIAN VOLCANISM AND SEDIMENTOGENESIS IN THE NORTH-EASTERN PART OF THE BALTIC SHIELD		PREDOVSKIY, A. A.; MELEZHIK, V. A.; BOLOTOV, V. I.; FEDOTOV, ZH. A.; BASALAEV, A. A.; KOZLOV, N. E.; IVANOV, A. A.		67.5	33	0.1				NOT	SEDIMENTARY			LIMESTONE		29.63	0.15	4.17		0.69		1.1		0.24	1	33.73		0.49	0.57	0.06		0.3		0.2	1						20
3-3		GEOROC		PRECAMBRIAN VOLCANISM AND SEDIMENTOGENESIS IN THE NORTH-EASTERN PART OF THE BALTIC SHIELD		PREDOVSKIY, A. A.; MELEZHIK, V. A.; BOLOTOV, V. I.; FEDOTOV, ZH. A.; BASALAEV, A. A.; KOZLOV, N. E.; IVANOV, A. A.		67.28	35.78	0.01				NOT	SEDIMENTARY			LIMESTONE		22.35	0.17	3.09		0.78		3.04		0.36	6.57	30.42		0.34	1	0.06		0.35		0.5	0.56						40
5-5		GEOROC		PRECAMBRIAN VOLCANISM AND SEDIMENTOGENESIS IN THE NORTH-EASTERN PART OF THE BALTIC SHIELD		PREDOVSKIY, A. A.; MELEZHIK, V. A.; BOLOTOV, V. I.; FEDOTOV, ZH. A.; BASALAEV, A. A.; KOZLOV, N. E.; IVANOV, A. A.		69.41	30.5	0.01				NOT	SEDIMENTARY			LIMESTONE		20.37	0.22	4.78		1.68		2.42		0.26	1.09	36.1		0.39	1.03	0.1					1.59						33
6-6		GEOROC		PRECAMBRIAN VOLCANISM AND SEDIMENTOGENESIS IN THE NORTH-EASTERN PART OF THE BALTIC SHIELD		PREDOVSKIY, A. A.; MELEZHIK, V. A.; BOLOTOV, V. I.; FEDOTOV, ZH. A.; BASALAEV, A. A.; KOZLOV, N. E.; IVANOV, A. A.		69.41	30.5	0.01				NOT	SEDIMENTARY			LIMESTONE		25.49	0.12	3.58		2.18		0.96		0.57	2.51	33.68		0.09	1.77	0.02					0.99						11
4-20		GEOROC		PRECAMBRIAN VOLCANISM AND SEDIMENTOGENESIS IN THE NORTH-EASTERN PART OF THE BALTIC SHIELD		PREDOVSKIY, A. A.; MELEZHIK, V. A.; BOLOTOV, V. I.; FEDOTOV, ZH. A.; BASALAEV, A. A.; KOZLOV, N. E.; IVANOV, A. A.		67.1	35.23	0.01				NOT	SEDIMENTARY			LIMESTONE		14.2	0.27	2.71		0.87		0.92		0.11	1.12	42.98		0.53	0.61	0.06					0.95						20
CARB-4		GEOROC	10.1180/002646100549652	AN ENRICHED MANTLE SOURCE FOR ITALY^S MELILITITE-CARBONATITE ASSOCIATION AS INFERRED BY ITS ND-SR ISOTOPE SIGNATURE	MINERAL. MAG.	CASTORINA, F.; STOPPA, F.; CUNDARI, A.; BARBIERI, MARIO		42.5928	12.8483	0.0001				ICPMS	SEDIMENTARY			LIMESTONE
CARB-4		GEOROC	10.1180/002646100549652	AN ENRICHED MANTLE SOURCE FOR ITALY^S MELILITITE-CARBONATITE ASSOCIATION AS INFERRED BY ITS ND-SR ISOTOPE SIGNATURE	MINERAL. MAG.	CASTORINA, F.; STOPPA, F.; CUNDARI, A.; BARBIERI, MARIO		42.5928	12.8483	0.0001				NOT	SEDIMENTARY			LIMESTONE											0.16	57
CARB-4		GEOROC	10.1180/002646100549652	AN ENRICHED MANTLE SOURCE FOR ITALY^S MELILITITE-CARBONATITE ASSOCIATION AS INFERRED BY ITS ND-SR ISOTOPE SIGNATURE	MINERAL. MAG.	CASTORINA, F.; STOPPA, F.; CUNDARI, A.; BARBIERI, MARIO		42.5928	12.8483	0.0001				TIMS	SEDIMENTARY			LIMESTONE
CARB-5		GEOROC	10.1180/002646100549652	AN ENRICHED MANTLE SOURCE FOR ITALY^S MELILITITE-CARBONATITE ASSOCIATION AS INFERRED BY ITS ND-SR ISOTOPE SIGNATURE	MINERAL. MAG.	CASTORINA, F.; STOPPA, F.; CUNDARI, A.; BARBIERI, MARIO		42.5928	12.8483	0.0001				TIMS	SEDIMENTARY			LIMESTONE
AM 7		GEOROC	10.1007/s007100200004	SOURCE CONTAMINATION AND MANTLE HETEROGENEITY IN THE GENESIS OF ITALIAN POTASSIC AND ULTRAPOTASSIC VOLCANIC ROCKS: SR-ND-PB ISOTOPE DATA FROM ROMAN PROVINCE AND SOUTHERN TUSCANY	MINERAL. PETROL.	CONTICELLI, S.; D^ANTONIO, M.; PINARELLI, L.; CIVETTA, L.		42.75	11.95	0.01				TIMS	SEDIMENTARY			LIMESTONE
CR5		GEOROC	10.1180/0026461056960298	CARBONATE VOLCANISM IN CALATRAVA, CENTRAL SPAIN: A REPORT ON THE INITIAL FINDINGS	MINERAL. MAG.	BAILEY, K.; GARSON, M. S.; KEARNS, S.; VELASCO, A. P.		39	-4	0.1				ICPMS	SEDIMENTARY			LIMESTONE																									3397
LIMESTONE		GEOROC	10.1007/BF01163061	THE ITALIAN CARBONATITES: FIELD OCCURRENCE, PETROLOGY AND REGIONAL SIGNIFICANCE	MINERAL. PETROL.	STOPPA, F.; WOOLLEY, A. R.		42.5928	12.8483	0.0001				NOT	SEDIMENTARY			LIMESTONE		0.11	0	0			0			0	0.13	56.97		0	0	0		42.59									6	0	0		0
AM 7		GEOROC		PETROLOGY AND MINERALOGY OF WOLLASTONITE- AND MELILITE-BEARING PARALAVAS FROM THE CENTRAL APENNINES, ITALY	AM. MINERAL.	MELLUSO, L.; CONTICELLI, S.; D^ANTONIO, M.; MIRCO, N. P.; SACCANI, E.		43.5	12	0.1				XRF	SEDIMENTARY			LIMESTONE		0.23		0.04			0.03					56															19
AM 7		GEOROC		PETROLOGY AND MINERALOGY OF WOLLASTONITE- AND MELILITE-BEARING PARALAVAS FROM THE CENTRAL APENNINES, ITALY	AM. MINERAL.	MELLUSO, L.; CONTICELLI, S.; D^ANTONIO, M.; MIRCO, N. P.; SACCANI, E.		43.5	12	0.1				AAS	SEDIMENTARY			LIMESTONE											0.41			0.05
AM 7		GEOROC		PETROLOGY AND MINERALOGY OF WOLLASTONITE- AND MELILITE-BEARING PARALAVAS FROM THE CENTRAL APENNINES, ITALY	AM. MINERAL.	MELLUSO, L.; CONTICELLI, S.; D^ANTONIO, M.; MIRCO, N. P.; SACCANI, E.		43.5	12	0.1				IGN	SEDIMENTARY			LIMESTONE																		43.2
AM 7		GEOROC		PETROLOGY AND MINERALOGY OF WOLLASTONITE- AND MELILITE-BEARING PARALAVAS FROM THE CENTRAL APENNINES, ITALY	AM. MINERAL.	MELLUSO, L.; CONTICELLI, S.; D^ANTONIO, M.; MIRCO, N. P.; SACCANI, E.		43.5	12	0.1				INAA	SEDIMENTARY			LIMESTONE																												1
AM 7		GEOROC		PETROLOGY AND MINERALOGY OF WOLLASTONITE- AND MELILITE-BEARING PARALAVAS FROM THE CENTRAL APENNINES, ITALY	AM. MINERAL.	MELLUSO, L.; CONTICELLI, S.; D^ANTONIO, M.; MIRCO, N. P.; SACCANI, E.		43.5	12	0.1				TIMS	SEDIMENTARY			LIMESTONE
AM 7		GEOROC	10.1016/j.lithos.2008.07.016	TRACE ELEMENTS AND SR-ND-PB ISOTOPES OF K-RICH, SHOSHONITIC, AND CALC-ALKALINE MAGMATISM OF THE WESTERN MEDITERRANEAN REGION: GENESIS OF ULTRAPOTASSIC TO CALC-ALKALINE MAGMATIC ASSOCIATIONS IN A POST-COLLISIONAL GEODYNAMIC SETTING	LITHOS	CONTICELLI, S.; GUARNIERI, L.; FARINELLI, A.; MATTEI, M.; AVANZINELLI, R.; BIANCHINI, G.; BOARI, E.; TOMMASINI, S.; TIEPOLO, M.; PRELEVIC, D.; VENTURELLI, G.		43.5	12	0.1				ICPMS_LA	SEDIMENTARY			LIMESTONE																											10	1
AM 7		GEOROC	10.1016/j.lithos.2008.07.016	TRACE ELEMENTS AND SR-ND-PB ISOTOPES OF K-RICH, SHOSHONITIC, AND CALC-ALKALINE MAGMATISM OF THE WESTERN MEDITERRANEAN REGION: GENESIS OF ULTRAPOTASSIC TO CALC-ALKALINE MAGMATIC ASSOCIATIONS IN A POST-COLLISIONAL GEODYNAMIC SETTING	LITHOS	CONTICELLI, S.; GUARNIERI, L.; FARINELLI, A.; MATTEI, M.; AVANZINELLI, R.; BIANCHINI, G.; BOARI, E.; TOMMASINI, S.; TIEPOLO, M.; PRELEVIC, D.; VENTURELLI, G.		43.5	12	0.1				TIMS	SEDIMENTARY			LIMESTONE
SD 33		GEOROC		PETROLOGY AND MINERALOGY OF WOLLASTONITE- AND MELILITE-BEARING PARALAVAS FROM THE CENTRAL APENNINES, ITALY	AM. MINERAL.	MELLUSO, L.; CONTICELLI, S.; D^ANTONIO, M.; MIRCO, N. P.; SACCANI, E.		43.5	12	0.1				XRF	SEDIMENTARY			LIMESTONE		6.68	0.09	2.08			1.21			0.13		50.2															10
SD 33		GEOROC		PETROLOGY AND MINERALOGY OF WOLLASTONITE- AND MELILITE-BEARING PARALAVAS FROM THE CENTRAL APENNINES, ITALY	AM. MINERAL.	MELLUSO, L.; CONTICELLI, S.; D^ANTONIO, M.; MIRCO, N. P.; SACCANI, E.		43.5	12	0.1				AAS	SEDIMENTARY			LIMESTONE											0.7			0.61	0.14
SD 33		GEOROC		PETROLOGY AND MINERALOGY OF WOLLASTONITE- AND MELILITE-BEARING PARALAVAS FROM THE CENTRAL APENNINES, ITALY	AM. MINERAL.	MELLUSO, L.; CONTICELLI, S.; D^ANTONIO, M.; MIRCO, N. P.; SACCANI, E.		43.5	12	0.1				IGN	SEDIMENTARY			LIMESTONE																		38.2
SD 33		GEOROC		PETROLOGY AND MINERALOGY OF WOLLASTONITE- AND MELILITE-BEARING PARALAVAS FROM THE CENTRAL APENNINES, ITALY	AM. MINERAL.	MELLUSO, L.; CONTICELLI, S.; D^ANTONIO, M.; MIRCO, N. P.; SACCANI, E.		43.5	12	0.1				INAA	SEDIMENTARY			LIMESTONE																												6
SD 33		GEOROC		PETROLOGY AND MINERALOGY OF WOLLASTONITE- AND MELILITE-BEARING PARALAVAS FROM THE CENTRAL APENNINES, ITALY	AM. MINERAL.	MELLUSO, L.; CONTICELLI, S.; D^ANTONIO, M.; MIRCO, N. P.; SACCANI, E.		43.5	12	0.1				TIMS	SEDIMENTARY			LIMESTONE
SD 33		GEOROC	10.1016/j.lithos.2008.07.016	TRACE ELEMENTS AND SR-ND-PB ISOTOPES OF K-RICH, SHOSHONITIC, AND CALC-ALKALINE MAGMATISM OF THE WESTERN MEDITERRANEAN REGION: GENESIS OF ULTRAPOTASSIC TO CALC-ALKALINE MAGMATIC ASSOCIATIONS IN A POST-COLLISIONAL GEODYNAMIC SETTING	LITHOS	CONTICELLI, S.; GUARNIERI, L.; FARINELLI, A.; MATTEI, M.; AVANZINELLI, R.; BIANCHINI, G.; BOARI, E.; TOMMASINI, S.; TIEPOLO, M.; PRELEVIC, D.; VENTURELLI, G.		43.5	12	0.1				ICPMS_LA	SEDIMENTARY			LIMESTONE																											19	6
SD 33		GEOROC	10.1016/j.lithos.2008.07.016	TRACE ELEMENTS AND SR-ND-PB ISOTOPES OF K-RICH, SHOSHONITIC, AND CALC-ALKALINE MAGMATISM OF THE WESTERN MEDITERRANEAN REGION: GENESIS OF ULTRAPOTASSIC TO CALC-ALKALINE MAGMATIC ASSOCIATIONS IN A POST-COLLISIONAL GEODYNAMIC SETTING	LITHOS	CONTICELLI, S.; GUARNIERI, L.; FARINELLI, A.; MATTEI, M.; AVANZINELLI, R.; BIANCHINI, G.; BOARI, E.; TOMMASINI, S.; TIEPOLO, M.; PRELEVIC, D.; VENTURELLI, G.		43.5	12	0.1				TIMS	SEDIMENTARY			LIMESTONE
ST135/26		GEOROC		PETROLOGY AND MINERALOGY OF WOLLASTONITE- AND MELILITE-BEARING PARALAVAS FROM THE CENTRAL APENNINES, ITALY	AM. MINERAL.	MELLUSO, L.; CONTICELLI, S.; D^ANTONIO, M.; MIRCO, N. P.; SACCANI, E.		43.5	12	0.1				XRF	SEDIMENTARY			LIMESTONE		10.8		0.86			1.06			0.31		48.3															0				23
ST135/26		GEOROC		PETROLOGY AND MINERALOGY OF WOLLASTONITE- AND MELILITE-BEARING PARALAVAS FROM THE CENTRAL APENNINES, ITALY	AM. MINERAL.	MELLUSO, L.; CONTICELLI, S.; D^ANTONIO, M.; MIRCO, N. P.; SACCANI, E.		43.5	12	0.1				AAS	SEDIMENTARY			LIMESTONE											0.52			0.01	0.09
ST135/26		GEOROC		PETROLOGY AND MINERALOGY OF WOLLASTONITE- AND MELILITE-BEARING PARALAVAS FROM THE CENTRAL APENNINES, ITALY	AM. MINERAL.	MELLUSO, L.; CONTICELLI, S.; D^ANTONIO, M.; MIRCO, N. P.; SACCANI, E.		43.5	12	0.1				IGN	SEDIMENTARY			LIMESTONE																		38.1
ST135/26		GEOROC		PETROLOGY AND MINERALOGY OF WOLLASTONITE- AND MELILITE-BEARING PARALAVAS FROM THE CENTRAL APENNINES, ITALY	AM. MINERAL.	MELLUSO, L.; CONTICELLI, S.; D^ANTONIO, M.; MIRCO, N. P.; SACCANI, E.		43.5	12	0.1				COL	SEDIMENTARY			LIMESTONE																0.02
ST135/26		GEOROC		PETROLOGY AND MINERALOGY OF WOLLASTONITE- AND MELILITE-BEARING PARALAVAS FROM THE CENTRAL APENNINES, ITALY	AM. MINERAL.	MELLUSO, L.; CONTICELLI, S.; D^ANTONIO, M.; MIRCO, N. P.; SACCANI, E.		43.5	12	0.1				TIMS	SEDIMENTARY			LIMESTONE
A		GEOROC		GEOLOGY OF ISHIGAKI-SHIMA, RYUKYU-RETTO	U. S. GEOL. SURV. PROF. PAP.	FOSTER, H. L.		24.47	124.2	0.01				NOT	SEDIMENTARY			LIMESTONE		1.82		0.62			0.3			0.01	0.22	54.02		0.089	0.083					0.65	0.13
B		GEOROC		GEOLOGY OF ISHIGAKI-SHIMA, RYUKYU-RETTO	U. S. GEOL. SURV. PROF. PAP.	FOSTER, H. L.		24.47	124.2	0.01				NOT	SEDIMENTARY			LIMESTONE		0.6					0.4				0.59	54.56		0.25	0.18					2
X79		GEOROC	10.1016/j.gr.2007.10.005	HIGHLY HETEROGENEOUS PRECAMBRIAN BASEMENT UNDER THE CENTRAL DECCAN TRAPS, INDIA: DIRECT EVIDENCE FROM XENOLITHS IN DYKES	GONDWANA RES.	RAY, R.; SHUKLA, A. D.; SHETH, H. C.; RAY, J. S.; DURAISWAMI, R. A.; VANDERKLUYSEN, L.; RAUTELA, C. S.; MALLIK, J.		20.65	74.95	0.01				ICPMS	SEDIMENTARY			LIMESTONE																											22	13			37
X79		GEOROC	10.1016/j.gr.2007.10.005	HIGHLY HETEROGENEOUS PRECAMBRIAN BASEMENT UNDER THE CENTRAL DECCAN TRAPS, INDIA: DIRECT EVIDENCE FROM XENOLITHS IN DYKES	GONDWANA RES.	RAY, R.; SHUKLA, A. D.; SHETH, H. C.; RAY, J. S.; DURAISWAMI, R. A.; VANDERKLUYSEN, L.; RAUTELA, C. S.; MALLIK, J.		20.65	74.95	0.01				XRF	SEDIMENTARY			LIMESTONE		15.97	0.33	3.56			3.76			0.04	5.1	39.21		0.01	0.23	0.11
X79		GEOROC	10.1016/j.gr.2007.10.005	HIGHLY HETEROGENEOUS PRECAMBRIAN BASEMENT UNDER THE CENTRAL DECCAN TRAPS, INDIA: DIRECT EVIDENCE FROM XENOLITHS IN DYKES	GONDWANA RES.	RAY, R.; SHUKLA, A. D.; SHETH, H. C.; RAY, J. S.; DURAISWAMI, R. A.; VANDERKLUYSEN, L.; RAUTELA, C. S.; MALLIK, J.		20.65	74.95	0.01				TIMS	SEDIMENTARY			LIMESTONE
T 81304		GEOROC		ORIGIN OF THE TAISHAKU GREENSTONES AS DEDUCED FROM ISOTOPIC COMPOSITIONS OF ND AND SR	MEM. GEOL. SOC. JAPAN	TAZAKI, K.; SANO, S.; KAGAMI, H.; NISHIMURA, Y.		34.9	133.2	0.1				TIMS	SEDIMENTARY			LIMESTONE
T 81401		GEOROC		ORIGIN OF THE TAISHAKU GREENSTONES AS DEDUCED FROM ISOTOPIC COMPOSITIONS OF ND AND SR	MEM. GEOL. SOC. JAPAN	TAZAKI, K.; SANO, S.; KAGAMI, H.; NISHIMURA, Y.		34.9	133.2	0.1				TIMS	SEDIMENTARY			LIMESTONE
ERN57		GEOROC	10.1093/petrology/egp003	TRANSITION FROM ULTRAPOTASSIC KAMAFUGITIC TO SUB-ALKALINE MAGMAS: SR, ND, AND PB ISOTOPE, TRACE ELEMENT AND 40AR-39AR AGE DATA FROM THE MIDDLE LATIN VALLEY VOLCANIC FIELD, ROMAN MAGMATIC PROVINCE, CENTRAL ITALY	J. PETROL.	BOARI, E.; TOMMASINI, S.; LAURENZI, M. A.; CONTICELLI, S.		41.5578	13.3031	0.0001	0.602	0.602	0.602	TIMS	SEDIMENTARY			LIMESTONE
ERN57		GEOROC	10.1093/petrology/egp003	TRANSITION FROM ULTRAPOTASSIC KAMAFUGITIC TO SUB-ALKALINE MAGMAS: SR, ND, AND PB ISOTOPE, TRACE ELEMENT AND 40AR-39AR AGE DATA FROM THE MIDDLE LATIN VALLEY VOLCANIC FIELD, ROMAN MAGMATIC PROVINCE, CENTRAL ITALY	J. PETROL.	BOARI, E.; TOMMASINI, S.; LAURENZI, M. A.; CONTICELLI, S.		41.5578	13.3031	0.0001	0.602	0.602	0.602	XRF	SEDIMENTARY			LIMESTONE		7.66	0.07	2.09		0.62				0.03		47.59			0.28	0.08											0	1.9	0		12
ERN57		GEOROC	10.1093/petrology/egp003	TRANSITION FROM ULTRAPOTASSIC KAMAFUGITIC TO SUB-ALKALINE MAGMAS: SR, ND, AND PB ISOTOPE, TRACE ELEMENT AND 40AR-39AR AGE DATA FROM THE MIDDLE LATIN VALLEY VOLCANIC FIELD, ROMAN MAGMATIC PROVINCE, CENTRAL ITALY	J. PETROL.	BOARI, E.; TOMMASINI, S.; LAURENZI, M. A.; CONTICELLI, S.		41.5578	13.3031	0.0001	0.602	0.602	0.602	AAS	SEDIMENTARY			LIMESTONE											1.05			0.55
ERN57		GEOROC	10.1093/petrology/egp003	TRANSITION FROM ULTRAPOTASSIC KAMAFUGITIC TO SUB-ALKALINE MAGMAS: SR, ND, AND PB ISOTOPE, TRACE ELEMENT AND 40AR-39AR AGE DATA FROM THE MIDDLE LATIN VALLEY VOLCANIC FIELD, ROMAN MAGMATIC PROVINCE, CENTRAL ITALY	J. PETROL.	BOARI, E.; TOMMASINI, S.; LAURENZI, M. A.; CONTICELLI, S.		41.5578	13.3031	0.0001	0.602	0.602	0.602	TIT	SEDIMENTARY			LIMESTONE								0.13
ERN57		GEOROC	10.1093/petrology/egp003	TRANSITION FROM ULTRAPOTASSIC KAMAFUGITIC TO SUB-ALKALINE MAGMAS: SR, ND, AND PB ISOTOPE, TRACE ELEMENT AND 40AR-39AR AGE DATA FROM THE MIDDLE LATIN VALLEY VOLCANIC FIELD, ROMAN MAGMATIC PROVINCE, CENTRAL ITALY	J. PETROL.	BOARI, E.; TOMMASINI, S.; LAURENZI, M. A.; CONTICELLI, S.		41.5578	13.3031	0.0001	0.602	0.602	0.602	GRAV	SEDIMENTARY			LIMESTONE																		39.85
ERN57		GEOROC	10.1093/petrology/egp003	TRANSITION FROM ULTRAPOTASSIC KAMAFUGITIC TO SUB-ALKALINE MAGMAS: SR, ND, AND PB ISOTOPE, TRACE ELEMENT AND 40AR-39AR AGE DATA FROM THE MIDDLE LATIN VALLEY VOLCANIC FIELD, ROMAN MAGMATIC PROVINCE, CENTRAL ITALY	J. PETROL.	BOARI, E.; TOMMASINI, S.; LAURENZI, M. A.; CONTICELLI, S.		41.5578	13.3031	0.0001	0.602	0.602	0.602	ICPMS	SEDIMENTARY			LIMESTONE																													3.1	0.46	14.7
ERN57		GEOROC	10.1016/j.lithos.2008.07.016	TRACE ELEMENTS AND SR-ND-PB ISOTOPES OF K-RICH, SHOSHONITIC, AND CALC-ALKALINE MAGMATISM OF THE WESTERN MEDITERRANEAN REGION: GENESIS OF ULTRAPOTASSIC TO CALC-ALKALINE MAGMATIC ASSOCIATIONS IN A POST-COLLISIONAL GEODYNAMIC SETTING	LITHOS	CONTICELLI, S.; GUARNIERI, L.; FARINELLI, A.; MATTEI, M.; AVANZINELLI, R.; BIANCHINI, G.; BOARI, E.; TOMMASINI, S.; TIEPOLO, M.; PRELEVIC, D.; VENTURELLI, G.		41.5578	13.3031	0.0001	0.602	0.602	0.602	ICPMS_LA	SEDIMENTARY			LIMESTONE																												2	3		15
ERN57		GEOROC	10.1016/j.lithos.2008.07.016	TRACE ELEMENTS AND SR-ND-PB ISOTOPES OF K-RICH, SHOSHONITIC, AND CALC-ALKALINE MAGMATISM OF THE WESTERN MEDITERRANEAN REGION: GENESIS OF ULTRAPOTASSIC TO CALC-ALKALINE MAGMATIC ASSOCIATIONS IN A POST-COLLISIONAL GEODYNAMIC SETTING	LITHOS	CONTICELLI, S.; GUARNIERI, L.; FARINELLI, A.; MATTEI, M.; AVANZINELLI, R.; BIANCHINI, G.; BOARI, E.; TOMMASINI, S.; TIEPOLO, M.; PRELEVIC, D.; VENTURELLI, G.		41.5578	13.3031	0.0001	0.602	0.602	0.602	TIMS	SEDIMENTARY			LIMESTONE
OSS88-11		GEOROC	10.1016/0040-1951(94)90054-X	SR-ND ISOTOPE AND TRACE-ELEMENT GEOCHEMISTRY OF LATE VARISCAN VOLCANISM IN THE PYRENEES: MAGMATISM IN POST-OROGENIC EXTENSION?	TECTONOPHYSICS	INNOCENT, C.; BRIQUEU, L.; CABANIS, B.		43.1	-0.05	0.01				TIMS_ID	SEDIMENTARY			LIMESTONE
OSS88-11		GEOROC	10.1016/0040-1951(94)90054-X	SR-ND ISOTOPE AND TRACE-ELEMENT GEOCHEMISTRY OF LATE VARISCAN VOLCANISM IN THE PYRENEES: MAGMATISM IN POST-OROGENIC EXTENSION?	TECTONOPHYSICS	INNOCENT, C.; BRIQUEU, L.; CABANIS, B.		43.1	-0.05	0.01				TIMS	SEDIMENTARY			LIMESTONE
OSS88-12		GEOROC	10.1016/0040-1951(94)90054-X	SR-ND ISOTOPE AND TRACE-ELEMENT GEOCHEMISTRY OF LATE VARISCAN VOLCANISM IN THE PYRENEES: MAGMATISM IN POST-OROGENIC EXTENSION?	TECTONOPHYSICS	INNOCENT, C.; BRIQUEU, L.; CABANIS, B.		43.1	-0.05	0.01				TIMS_ID	SEDIMENTARY			LIMESTONE
OSS88-12		GEOROC	10.1016/0040-1951(94)90054-X	SR-ND ISOTOPE AND TRACE-ELEMENT GEOCHEMISTRY OF LATE VARISCAN VOLCANISM IN THE PYRENEES: MAGMATISM IN POST-OROGENIC EXTENSION?	TECTONOPHYSICS	INNOCENT, C.; BRIQUEU, L.; CABANIS, B.		43.1	-0.05	0.01				TIMS	SEDIMENTARY			LIMESTONE
ALM10B		GEOROC	10.1016/j.lithos.2008.07.016	TRACE ELEMENTS AND SR-ND-PB ISOTOPES OF K-RICH, SHOSHONITIC, AND CALC-ALKALINE MAGMATISM OF THE WESTERN MEDITERRANEAN REGION: GENESIS OF ULTRAPOTASSIC TO CALC-ALKALINE MAGMATIC ASSOCIATIONS IN A POST-COLLISIONAL GEODYNAMIC SETTING	LITHOS	CONTICELLI, S.; GUARNIERI, L.; FARINELLI, A.; MATTEI, M.; AVANZINELLI, R.; BIANCHINI, G.; BOARI, E.; TOMMASINI, S.; TIEPOLO, M.; PRELEVIC, D.; VENTURELLI, G.		38.5	-1.75	0.01				ICPMS_LA	SEDIMENTARY			LIMESTONE																											1	0	10		11
ALM10B		GEOROC	10.1016/j.lithos.2008.07.016	TRACE ELEMENTS AND SR-ND-PB ISOTOPES OF K-RICH, SHOSHONITIC, AND CALC-ALKALINE MAGMATISM OF THE WESTERN MEDITERRANEAN REGION: GENESIS OF ULTRAPOTASSIC TO CALC-ALKALINE MAGMATIC ASSOCIATIONS IN A POST-COLLISIONAL GEODYNAMIC SETTING	LITHOS	CONTICELLI, S.; GUARNIERI, L.; FARINELLI, A.; MATTEI, M.; AVANZINELLI, R.; BIANCHINI, G.; BOARI, E.; TOMMASINI, S.; TIEPOLO, M.; PRELEVIC, D.; VENTURELLI, G.		38.5	-1.75	0.01				TIMS	SEDIMENTARY			LIMESTONE
10-13-A		GEOROC	10.1139/e79-155	ISOTOPIC DATES AND STRONTIUM ISOTOPIC RATIOS FOR PLUTONIC AND VOLCANIC ROCKS IN THE QUESNEL TROUGH AND NICOLA BELT, SOUTH-CENTRAL BRITISH COLUMBIA	CAN. J. EARTH SCI.	PRETO, V. A.; OSATENKO, M. J.; MCMILLAN, W. J.; ARMSTRONG, R. L.		50.5153	-121.291	0.0001				XRF	SEDIMENTARY			LIMESTONE
10-13-A		GEOROC	10.1139/e79-155	ISOTOPIC DATES AND STRONTIUM ISOTOPIC RATIOS FOR PLUTONIC AND VOLCANIC ROCKS IN THE QUESNEL TROUGH AND NICOLA BELT, SOUTH-CENTRAL BRITISH COLUMBIA	CAN. J. EARTH SCI.	PRETO, V. A.; OSATENKO, M. J.; MCMILLAN, W. J.; ARMSTRONG, R. L.		50.5153	-121.291	0.0001				TIMS	SEDIMENTARY			LIMESTONE
6-14-2		GEOROC	10.1139/e79-155	ISOTOPIC DATES AND STRONTIUM ISOTOPIC RATIOS FOR PLUTONIC AND VOLCANIC ROCKS IN THE QUESNEL TROUGH AND NICOLA BELT, SOUTH-CENTRAL BRITISH COLUMBIA	CAN. J. EARTH SCI.	PRETO, V. A.; OSATENKO, M. J.; MCMILLAN, W. J.; ARMSTRONG, R. L.		50.5389	-121.298	0.0001				TIMS	SEDIMENTARY			LIMESTONE
6-14-2		GEOROC	10.1139/e79-155	ISOTOPIC DATES AND STRONTIUM ISOTOPIC RATIOS FOR PLUTONIC AND VOLCANIC ROCKS IN THE QUESNEL TROUGH AND NICOLA BELT, SOUTH-CENTRAL BRITISH COLUMBIA	CAN. J. EARTH SCI.	PRETO, V. A.; OSATENKO, M. J.; MCMILLAN, W. J.; ARMSTRONG, R. L.		50.5389	-121.298	0.0001				XRF	SEDIMENTARY			LIMESTONE
PZ-7		GEOROC	10.1016/0377-0273(91)90049-6	OXYGEN ISOTOPE EVIDENCE FOR PAST AND PRESENT HYDROTHERMAL REGIMES OF LONG VALLEY CALDERA, CALIFORNIA	J. VOLCANOL. GEOTHERM. RES.	SMITH, B. M.; SUEMNICHT, G. A.		37.6	-118.8	0.1				MS	SEDIMENTARY			LIMESTONE
WP-3		GEOROC	10.1016/j.jsames.2012.10.004	AN OVERVIEW OF MONOGENETIC CARBONATITIC MAGMATISM FROM UGANDA, ITALY, CHINA AND SPAIN: VOLCANOLOGIC AND GEOCHEMICAL FEATURES	J. S. AMER. EARTH SCI.	STOPPA, F.; SCHIAZZA, M.		34.0975	105.108	0.0001				NOT	SEDIMENTARY			LIMESTONE		0.94	0.03	0.19		0.4		0.11		0.09	0.31	55.4		0	0.05	0		42.4
WP-3		GEOROC	10.1016/j.jsames.2012.10.004	AN OVERVIEW OF MONOGENETIC CARBONATITIC MAGMATISM FROM UGANDA, ITALY, CHINA AND SPAIN: VOLCANOLOGIC AND GEOCHEMICAL FEATURES	J. S. AMER. EARTH SCI.	STOPPA, F.; SCHIAZZA, M.		34.0975	105.108	0.0001				ICPMS	SEDIMENTARY			LIMESTONE																											13
LA97-78		GEOROC	10.1130/0016-7606(2000)112<450:SAGEOT>2.0.CO;2	SEDIMENTARY AND GEOCHEMICAL EVOLUTION OF THE DRAS FOREARC BASIN, INDUS SUTURE, LADAKH HIMALAYA, INDIA	BULL. GEOL. SOC. AM.	CLIFT, P. D.; DEGNAN, P. J.; HANNIGAN, R.; BLUSZTAJN, J.		34.3	76.5	0.1				ICPMS	SEDIMENTARY			LIMESTONE																									0.345	0.039		3.15	8.91	19.4	10.8
PS280		GEOROC	10.1016/j.lithos.2013.10.027	CARBONATITES AND PRIMARY CARBONATES IN THE RIO APA AND AMAMBAY REGIONS, NE PARAGUAY	LITHOS	COMIN-CHIARAMONTI, P.; DE MIN, A.; GIRARDI, V. A. V.; GOMES, C. B.		-22.1697	-57.956	0.0001				XRF	SEDIMENTARY			LIMESTONE											55.8
PS280		GEOROC	10.1016/j.lithos.2013.10.027	CARBONATITES AND PRIMARY CARBONATES IN THE RIO APA AND AMAMBAY REGIONS, NE PARAGUAY	LITHOS	COMIN-CHIARAMONTI, P.; DE MIN, A.; GIRARDI, V. A. V.; GOMES, C. B.		-22.1697	-57.956	0.0001				COL	SEDIMENTARY			LIMESTONE
PS280		GEOROC	10.1016/j.lithos.2013.10.027	CARBONATITES AND PRIMARY CARBONATES IN THE RIO APA AND AMAMBAY REGIONS, NE PARAGUAY	LITHOS	COMIN-CHIARAMONTI, P.; DE MIN, A.; GIRARDI, V. A. V.; GOMES, C. B.		-22.1697	-57.956	0.0001				ICPMS	SEDIMENTARY			LIMESTONE
PS280		GEOROC	10.1016/j.lithos.2013.10.027	CARBONATITES AND PRIMARY CARBONATES IN THE RIO APA AND AMAMBAY REGIONS, NE PARAGUAY	LITHOS	COMIN-CHIARAMONTI, P.; DE MIN, A.; GIRARDI, V. A. V.; GOMES, C. B.		-22.1697	-57.956	0.0001				MS	SEDIMENTARY			LIMESTONE
PS280		GEOROC	10.1016/j.lithos.2013.10.027	CARBONATITES AND PRIMARY CARBONATES IN THE RIO APA AND AMAMBAY REGIONS, NE PARAGUAY	LITHOS	COMIN-CHIARAMONTI, P.; DE MIN, A.; GIRARDI, V. A. V.; GOMES, C. B.		-22.1697	-57.956	0.0001				TIMS	SEDIMENTARY			LIMESTONE
53		GEOROC	10.1016/J.EPSL.2013.04.025	STABLE ISOTOPE EVIDENCE FOR MULTIPLE PULSES OF RAPID SURFACE UPLIFT IN THE CENTRAL ANDES, BOLIVIA	EARTH PLANET. SCI. LETT.	LEIER, A.; MCQUARRIE, N.; GARZIONE, C. N.; EILER, J. M.		-17.238	-67.352	0.001				TIMS	SEDIMENTARY			LIMESTONE
NX386		GEOROC	10.1007/s00710-013-0301-7	GEOCHEMISTRY AND PETROGENESIS OF CARBONATITES FROM SOUTH NAM XE, LAI CHAU AREA, NORTHWEST VIETNAM	MINERAL. PETROL.	THI, T. N.; WADA, H.; ISHIKAWA, TSUYOSHI; SHIMANO, T.		22.5	103.4	0.1				XRF	SEDIMENTARY			LIMESTONE		18.17	0.4	4.87			2.37			0.03	1.43	50.14		0.21	0.98	0.11
NX386		GEOROC	10.1007/s00710-013-0301-7	GEOCHEMISTRY AND PETROGENESIS OF CARBONATITES FROM SOUTH NAM XE, LAI CHAU AREA, NORTHWEST VIETNAM	MINERAL. PETROL.	THI, T. N.; WADA, H.; ISHIKAWA, TSUYOSHI; SHIMANO, T.		22.5	103.4	0.1				IGN	SEDIMENTARY			LIMESTONE																		22.75
NX386		GEOROC	10.1007/s00710-013-0301-7	GEOCHEMISTRY AND PETROGENESIS OF CARBONATITES FROM SOUTH NAM XE, LAI CHAU AREA, NORTHWEST VIETNAM	MINERAL. PETROL.	THI, T. N.; WADA, H.; ISHIKAWA, TSUYOSHI; SHIMANO, T.		22.5	103.4	0.1				ICPMS	SEDIMENTARY			LIMESTONE																											20.9	16.4	27.1		30.1
NX386		GEOROC	10.1007/s00710-013-0301-7	GEOCHEMISTRY AND PETROGENESIS OF CARBONATITES FROM SOUTH NAM XE, LAI CHAU AREA, NORTHWEST VIETNAM	MINERAL. PETROL.	THI, T. N.; WADA, H.; ISHIKAWA, TSUYOSHI; SHIMANO, T.		22.5	103.4	0.1				TIMS	SEDIMENTARY			LIMESTONE
NX386		GEOROC	10.1007/s00710-013-0301-7	GEOCHEMISTRY AND PETROGENESIS OF CARBONATITES FROM SOUTH NAM XE, LAI CHAU AREA, NORTHWEST VIETNAM	MINERAL. PETROL.	THI, T. N.; WADA, H.; ISHIKAWA, TSUYOSHI; SHIMANO, T.		22.5	103.4	0.1				MC_ICPMS	SEDIMENTARY			LIMESTONE
NX386		GEOROC	10.1007/s00710-013-0301-7	GEOCHEMISTRY AND PETROGENESIS OF CARBONATITES FROM SOUTH NAM XE, LAI CHAU AREA, NORTHWEST VIETNAM	MINERAL. PETROL.	THI, T. N.; WADA, H.; ISHIKAWA, TSUYOSHI; SHIMANO, T.		22.5	103.4	0.1				MS	SEDIMENTARY			LIMESTONE
NX394		GEOROC	10.1007/s00710-013-0301-7	GEOCHEMISTRY AND PETROGENESIS OF CARBONATITES FROM SOUTH NAM XE, LAI CHAU AREA, NORTHWEST VIETNAM	MINERAL. PETROL.	THI, T. N.; WADA, H.; ISHIKAWA, TSUYOSHI; SHIMANO, T.		22.5	103.4	0.1				XRF	SEDIMENTARY			LIMESTONE		6.24	0	0			0.03			0	2.02	66.88		0.38	0.03	0.02
NX394		GEOROC	10.1007/s00710-013-0301-7	GEOCHEMISTRY AND PETROGENESIS OF CARBONATITES FROM SOUTH NAM XE, LAI CHAU AREA, NORTHWEST VIETNAM	MINERAL. PETROL.	THI, T. N.; WADA, H.; ISHIKAWA, TSUYOSHI; SHIMANO, T.		22.5	103.4	0.1				IGN	SEDIMENTARY			LIMESTONE																		24.2
NX394		GEOROC	10.1007/s00710-013-0301-7	GEOCHEMISTRY AND PETROGENESIS OF CARBONATITES FROM SOUTH NAM XE, LAI CHAU AREA, NORTHWEST VIETNAM	MINERAL. PETROL.	THI, T. N.; WADA, H.; ISHIKAWA, TSUYOSHI; SHIMANO, T.		22.5	103.4	0.1				ICPMS	SEDIMENTARY			LIMESTONE																											8.51	2.03	0.66		2.07
NX394		GEOROC	10.1007/s00710-013-0301-7	GEOCHEMISTRY AND PETROGENESIS OF CARBONATITES FROM SOUTH NAM XE, LAI CHAU AREA, NORTHWEST VIETNAM	MINERAL. PETROL.	THI, T. N.; WADA, H.; ISHIKAWA, TSUYOSHI; SHIMANO, T.		22.5	103.4	0.1				TIMS	SEDIMENTARY			LIMESTONE
NX394		GEOROC	10.1007/s00710-013-0301-7	GEOCHEMISTRY AND PETROGENESIS OF CARBONATITES FROM SOUTH NAM XE, LAI CHAU AREA, NORTHWEST VIETNAM	MINERAL. PETROL.	THI, T. N.; WADA, H.; ISHIKAWA, TSUYOSHI; SHIMANO, T.		22.5	103.4	0.1				MC_ICPMS	SEDIMENTARY			LIMESTONE
NX394		GEOROC	10.1007/s00710-013-0301-7	GEOCHEMISTRY AND PETROGENESIS OF CARBONATITES FROM SOUTH NAM XE, LAI CHAU AREA, NORTHWEST VIETNAM	MINERAL. PETROL.	THI, T. N.; WADA, H.; ISHIKAWA, TSUYOSHI; SHIMANO, T.		22.5	103.4	0.1				MS	SEDIMENTARY			LIMESTONE
NX394.2		GEOROC	10.1007/s00710-013-0301-7	GEOCHEMISTRY AND PETROGENESIS OF CARBONATITES FROM SOUTH NAM XE, LAI CHAU AREA, NORTHWEST VIETNAM	MINERAL. PETROL.	THI, T. N.; WADA, H.; ISHIKAWA, TSUYOSHI; SHIMANO, T.		22.5	103.4	0.1				MS	SEDIMENTARY			LIMESTONE
TS168		GEOROC	10.1007/s00710-013-0301-7	GEOCHEMISTRY AND PETROGENESIS OF CARBONATITES FROM SOUTH NAM XE, LAI CHAU AREA, NORTHWEST VIETNAM	MINERAL. PETROL.	THI, T. N.; WADA, H.; ISHIKAWA, TSUYOSHI; SHIMANO, T.		22.5	103.4	0.1				MS	SEDIMENTARY			LIMESTONE
NX382		GEOROC	10.1007/s00710-013-0301-7	GEOCHEMISTRY AND PETROGENESIS OF CARBONATITES FROM SOUTH NAM XE, LAI CHAU AREA, NORTHWEST VIETNAM	MINERAL. PETROL.	THI, T. N.; WADA, H.; ISHIKAWA, TSUYOSHI; SHIMANO, T.		22.5	103.4	0.1				MS	SEDIMENTARY			LIMESTONE
NX383		GEOROC	10.1007/s00710-013-0301-7	GEOCHEMISTRY AND PETROGENESIS OF CARBONATITES FROM SOUTH NAM XE, LAI CHAU AREA, NORTHWEST VIETNAM	MINERAL. PETROL.	THI, T. N.; WADA, H.; ISHIKAWA, TSUYOSHI; SHIMANO, T.		22.5	103.4	0.1				MS	SEDIMENTARY			LIMESTONE
NX385		GEOROC	10.1007/s00710-013-0301-7	GEOCHEMISTRY AND PETROGENESIS OF CARBONATITES FROM SOUTH NAM XE, LAI CHAU AREA, NORTHWEST VIETNAM	MINERAL. PETROL.	THI, T. N.; WADA, H.; ISHIKAWA, TSUYOSHI; SHIMANO, T.		22.5	103.4	0.1				MS	SEDIMENTARY			LIMESTONE
NX387		GEOROC	10.1007/s00710-013-0301-7	GEOCHEMISTRY AND PETROGENESIS OF CARBONATITES FROM SOUTH NAM XE, LAI CHAU AREA, NORTHWEST VIETNAM	MINERAL. PETROL.	THI, T. N.; WADA, H.; ISHIKAWA, TSUYOSHI; SHIMANO, T.		22.5	103.4	0.1				MS	SEDIMENTARY			LIMESTONE
1043		GEOROC	10.1093/petroj/39.11-12.1865	PB-SR-ND ISOTOPE DATA FROM 30 AND 300 MA COLLISION ZONE CARBONATITES IN NORTHWEST PAKISTAN	J. PETROL.	TILTON, G. R.; BRYCE, J. G.; MATEEN, A.		32.45	71.95	0.01				TIMS_ID	SEDIMENTARY			LIMESTONE
1043		GEOROC	10.1093/petroj/39.11-12.1865	PB-SR-ND ISOTOPE DATA FROM 30 AND 300 MA COLLISION ZONE CARBONATITES IN NORTHWEST PAKISTAN	J. PETROL.	TILTON, G. R.; BRYCE, J. G.; MATEEN, A.		32.45	71.95	0.01				TIMS	SEDIMENTARY			LIMESTONE
1047		GEOROC	10.1093/petroj/39.11-12.1865	PB-SR-ND ISOTOPE DATA FROM 30 AND 300 MA COLLISION ZONE CARBONATITES IN NORTHWEST PAKISTAN	J. PETROL.	TILTON, G. R.; BRYCE, J. G.; MATEEN, A.		32.45	71.95	0.01				TIMS_ID	SEDIMENTARY			LIMESTONE
1047		GEOROC	10.1093/petroj/39.11-12.1865	PB-SR-ND ISOTOPE DATA FROM 30 AND 300 MA COLLISION ZONE CARBONATITES IN NORTHWEST PAKISTAN	J. PETROL.	TILTON, G. R.; BRYCE, J. G.; MATEEN, A.		32.45	71.95	0.01				TIMS	SEDIMENTARY			LIMESTONE
A007-2		GEOROC	10.1093/PETROLOGY/EGU026	POLYMAGMATIC ACTIVITY AT THE MONOGENETIC MT GAMBIER VOLCANIC COMPLEX IN THE NEWER VOLCANICS PROVINCE, SE AUSTRALIA: NEW INSIGHTS INTO THE OCCURRENCE OF INTRAPLATE VOLCANIC ACTIVITY IN AUSTRALIA	J. PETROL.	VAN OTTERLOO, J.; RAVEGGI, M.; CAS, R. A. F.; MAAS, R.		-37.8333	140.75	0.0001	0.005	0.005	0.005	XRF	SEDIMENTARY			LIMESTONE		12.605	0.151192	2.12349					0.896962	0.0169879	19.1284	63.6707		0.234433	0.793336	0.127409						0.0832408
A007-2		GEOROC	10.1093/PETROLOGY/EGU026	POLYMAGMATIC ACTIVITY AT THE MONOGENETIC MT GAMBIER VOLCANIC COMPLEX IN THE NEWER VOLCANICS PROVINCE, SE AUSTRALIA: NEW INSIGHTS INTO THE OCCURRENCE OF INTRAPLATE VOLCANIC ACTIVITY IN AUSTRALIA	J. PETROL.	VAN OTTERLOO, J.; RAVEGGI, M.; CAS, R. A. F.; MAAS, R.		-37.8333	140.75	0.0001	0.005	0.005	0.005	ICPMS	SEDIMENTARY			LIMESTONE																										228.972	61.7647	17.2348	10.2494		11.3355
A007-2		GEOROC	10.1093/PETROLOGY/EGU026	POLYMAGMATIC ACTIVITY AT THE MONOGENETIC MT GAMBIER VOLCANIC COMPLEX IN THE NEWER VOLCANICS PROVINCE, SE AUSTRALIA: NEW INSIGHTS INTO THE OCCURRENCE OF INTRAPLATE VOLCANIC ACTIVITY IN AUSTRALIA	J. PETROL.	VAN OTTERLOO, J.; RAVEGGI, M.; CAS, R. A. F.; MAAS, R.		-37.8333	140.75	0.0001	0.005	0.005	0.005	MC_ICPMS	SEDIMENTARY			LIMESTONE
JM10-228		GEOROC	10.1007/s00710-021-00768-6	THE GENESIS OF GUANTING PB-ZN DEPOSITS IN THE JIANSHUI AREA, YUNNAN PROVINCE, SW CHINA: CONSTRAINTS FROM GEOCHRONOLOGY, S ISOTOPES AND TRACE ELEMENTS	MINERAL. PETROL.	SHEN, XIAO-LI; LIN, HONGHONG; ZHANG, BAOLIN; DU, QINGXIANG		23.3037	102.722	0.0001				ICPMS_SF	SEDIMENTARY			LIMESTONE																											11.7	1.77	1.94
JM10-236		GEOROC	10.1007/s00710-021-00768-6	THE GENESIS OF GUANTING PB-ZN DEPOSITS IN THE JIANSHUI AREA, YUNNAN PROVINCE, SW CHINA: CONSTRAINTS FROM GEOCHRONOLOGY, S ISOTOPES AND TRACE ELEMENTS	MINERAL. PETROL.	SHEN, XIAO-LI; LIN, HONGHONG; ZHANG, BAOLIN; DU, QINGXIANG		23.3037	102.722	0.0001				ICPMS_SF	SEDIMENTARY			LIMESTONE																											5.77	1.44	1.57
JM10-237		GEOROC	10.1007/s00710-021-00768-6	THE GENESIS OF GUANTING PB-ZN DEPOSITS IN THE JIANSHUI AREA, YUNNAN PROVINCE, SW CHINA: CONSTRAINTS FROM GEOCHRONOLOGY, S ISOTOPES AND TRACE ELEMENTS	MINERAL. PETROL.	SHEN, XIAO-LI; LIN, HONGHONG; ZHANG, BAOLIN; DU, QINGXIANG		23.3037	102.722	0.0001				ICPMS_SF	SEDIMENTARY			LIMESTONE																											27.6	9.34	17.2
Z-623		GEOROC	10.1093/petrology/egm006	A NORTH-SOUTH TRANSECT ACROSS THE CENTRAL MEXICAN VOLCANIC BELT AT ~100°W: SPATIAL DISTRIBUTION, PETROLOGICAL, GEOCHEMICAL, AND ISOTOPIC CHARACTERISTICS OF QUATERNARY VOLCANISM	J. PETROL.	BLATTER, D. L.; FARMER, G. L.; CARMICHAEL, I. S. E.		19.4583	-100.461	0.0001				XRF	SEDIMENTARY			LIMESTONE		0.58	0.04	0.33					0.06	0.03	0.71	65.31		0	0.05	0.03											1		5		12
Z-623		GEOROC	10.1093/petrology/egm006	A NORTH-SOUTH TRANSECT ACROSS THE CENTRAL MEXICAN VOLCANIC BELT AT ~100°W: SPATIAL DISTRIBUTION, PETROLOGICAL, GEOCHEMICAL, AND ISOTOPIC CHARACTERISTICS OF QUATERNARY VOLCANISM	J. PETROL.	BLATTER, D. L.; FARMER, G. L.; CARMICHAEL, I. S. E.		19.4583	-100.461	0.0001				ICPMS	SEDIMENTARY			LIMESTONE
AAW056		USGS		Geochemistry of rock samples from the National Geochemical Database: U.S. Geological Survey, Reston, VA.	U.S. Geological Survey	USGS		47.4842	-115.961	0.01	66	66	66	COL	SEDIMENTARY	UNKNOWN	UNKNOWN	LIMESTONE
AAW056		USGS		Geochemistry of rock samples from the National Geochemical Database: U.S. Geological Survey, Reston, VA.	U.S. Geological Survey	USGS		47.4842	-115.961	0.01	66	66	66	AAS	SEDIMENTARY	UNKNOWN	UNKNOWN	LIMESTONE																														1.8	260
AAW056		USGS		Geochemistry of rock samples from the National Geochemical Database: U.S. Geological Survey, Reston, VA.	U.S. Geological Survey	USGS		47.4842	-115.961	0.01	66	66	66	ES	SEDIMENTARY	UNKNOWN	UNKNOWN	LIMESTONE																									0.5	150	5		10		200
AAW056		USGS		Geochemistry of rock samples from the National Geochemical Database: U.S. Geological Survey, Reston, VA.	U.S. Geological Survey	USGS		47.4842	-115.961	0.01	66	66	66	ISE	SEDIMENTARY	UNKNOWN	UNKNOWN	LIMESTONE
AAW056		USGS		Geochemistry of rock samples from the National Geochemical Database: U.S. Geological Survey, Reston, VA.	U.S. Geological Survey	USGS		47.4842	-115.961	0.01	66	66	66	TITR	SEDIMENTARY	UNKNOWN	UNKNOWN	LIMESTONE
AC683		USGS		Geochemistry of rock samples from the National Geochemical Database: U.S. Geological Survey, Reston, VA.	U.S. Geological Survey	USGS		17.9847	-67.0564	0.01				AAS	SEDIMENTARY	UNKNOWN	UNKNOWN	LIMESTONE																															20
AC683		USGS		Geochemistry of rock samples from the National Geochemical Database: U.S. Geological Survey, Reston, VA.	U.S. Geological Survey	USGS		17.9847	-67.0564	0.01				ES	SEDIMENTARY	UNKNOWN	UNKNOWN	LIMESTONE																									1.5	1500	15		30
AC723		USGS		Geochemistry of rock samples from the National Geochemical Database: U.S. Geological Survey, Reston, VA.	U.S. Geological Survey	USGS		18.0658	-66.9808	0.01				AAS	SEDIMENTARY	UNKNOWN	UNKNOWN	LIMESTONE																															46
AC723		USGS		Geochemistry of rock samples from the National Geochemical Database: U.S. Geological Survey, Reston, VA.	U.S. Geological Survey	USGS		18.0658	-66.9808	0.01				COL	SEDIMENTARY	UNKNOWN	UNKNOWN	LIMESTONE
AC723		USGS		Geochemistry of rock samples from the National Geochemical Database: U.S. Geological Survey, Reston, VA.	U.S. Geological Survey	USGS		18.0658	-66.9808	0.01				ES	SEDIMENTARY	UNKNOWN	UNKNOWN	LIMESTONE																									7	1000	70	15	50
AC750		USGS		Geochemistry of rock samples from the National Geochemical Database: U.S. Geological Survey, Reston, VA.	U.S. Geological Survey	USGS		18.0675	-66.9494	0.01				AAS	SEDIMENTARY	UNKNOWN	UNKNOWN	LIMESTONE																															36
AC750		USGS		Geochemistry of rock samples from the National Geochemical Database: U.S. Geological Survey, Reston, VA.	U.S. Geological Survey	USGS		18.0675	-66.9494	0.01				ES	SEDIMENTARY	UNKNOWN	UNKNOWN	LIMESTONE																									2	700	20		30
AC783		USGS		Geochemistry of rock samples from the National Geochemical Database: U.S. Geological Survey, Reston, VA.	U.S. Geological Survey	USGS		18.0725	-67.025	0.01				AAS	SEDIMENTARY	UNKNOWN	UNKNOWN	LIMESTONE																															24
AC783		USGS		Geochemistry of rock samples from the National Geochemical Database: U.S. Geological Survey, Reston, VA.	U.S. Geological Survey	USGS		18.0725	-67.025	0.01				ES	SEDIMENTARY	UNKNOWN	UNKNOWN	LIMESTONE																									1	1000	20		30
AC794		USGS		Geochemistry of rock samples from the National Geochemical Database: U.S. Geological Survey, Reston, VA.	U.S. Geological Survey	USGS		18.07	-67.0325	0.01				AAS	SEDIMENTARY	UNKNOWN	UNKNOWN	LIMESTONE																															23
AC794		USGS		Geochemistry of rock samples from the National Geochemical Database: U.S. Geological Survey, Reston, VA.	U.S. Geological Survey	USGS		18.07	-67.0325	0.01				COL	SEDIMENTARY	UNKNOWN	UNKNOWN	LIMESTONE
AC794		USGS		Geochemistry of rock samples from the National Geochemical Database: U.S. Geological Survey, Reston, VA.	U.S. Geological Survey	USGS		18.07	-67.0325	0.01				ES	SEDIMENTARY	UNKNOWN	UNKNOWN	LIMESTONE																									3	100	200	15	20
AC803		USGS		Geochemistry of rock samples from the National Geochemical Database: U.S. Geological Survey, Reston, VA.	U.S. Geological Survey	USGS		18.0039	-67.0969	0.01				AAS	SEDIMENTARY	UNKNOWN	UNKNOWN	LIMESTONE																															37
AC803		USGS		Geochemistry of rock samples from the National Geochemical Database: U.S. Geological Survey, Reston, VA.	U.S. Geological Survey	USGS		18.0039	-67.0969	0.01				ES	SEDIMENTARY	UNKNOWN	UNKNOWN	LIMESTONE																									1.5	1500		5
ACH669		USGS		Geochemistry of rock samples from the National Geochemical Database: U.S. Geological Survey, Reston, VA.	U.S. Geological Survey	USGS		62.7483	-143.962	0.01				ES	SEDIMENTARY	UNKNOWN	UNKNOWN	LIMESTONE																									10	1500	7	30	300
ACH777		USGS		Geochemistry of rock samples from the National Geochemical Database: U.S. Geological Survey, Reston, VA.	U.S. Geological Survey	USGS		62.885	-143.358	0.01				ES	SEDIMENTARY	UNKNOWN	UNKNOWN	LIMESTONE																									7	1500	2000	100	20
ACH779		USGS		Geochemistry of rock samples from the National Geochemical Database: U.S. Geological Survey, Reston, VA.	U.S. Geological Survey	USGS		62.88	-143.338	0.01				ES	SEDIMENTARY	UNKNOWN	UNKNOWN	LIMESTONE																									7	3000	500	30	15
AD626		USGS		Geochemistry of rock samples from the National Geochemical Database: U.S. Geological Survey, Reston, VA.	U.S. Geological Survey	USGS		17.9975	-67.2064	0.01				AAS	SEDIMENTARY	UNKNOWN	UNKNOWN	LIMESTONE																															24
AD626		USGS		Geochemistry of rock samples from the National Geochemical Database: U.S. Geological Survey, Reston, VA.	U.S. Geological Survey	USGS		17.9975	-67.2064	0.01				ES	SEDIMENTARY	UNKNOWN	UNKNOWN	LIMESTONE																									3	700	1000	50	70
AD652		USGS		Geochemistry of rock samples from the National Geochemical Database: U.S. Geological Survey, Reston, VA.	U.S. Geological Survey	USGS		17.9956	-67.1817	0.01				AAS	SEDIMENTARY	UNKNOWN	UNKNOWN	LIMESTONE																															46
AD652		USGS		Geochemistry of rock samples from the National Geochemical Database: U.S. Geological Survey, Reston, VA.	U.S. Geological Survey	USGS		17.9956	-67.1817	0.01				ES	SEDIMENTARY	UNKNOWN	UNKNOWN	LIMESTONE																									5	700	700	20	70
AD684		USGS		Geochemistry of rock samples from the National Geochemical Database: U.S. Geological Survey, Reston, VA.	U.S. Geological Survey	USGS		18.0022	-67.1692	0.01				AAS	SEDIMENTARY	UNKNOWN	UNKNOWN	LIMESTONE																															34
AD684		USGS		Geochemistry of rock samples from the National Geochemical Database: U.S. Geological Survey, Reston, VA.	U.S. Geological Survey	USGS		18.0022	-67.1692	0.01				ES	SEDIMENTARY	UNKNOWN	UNKNOWN	LIMESTONE																									5	300	200	30	10
AD689		USGS		Geochemistry of rock samples from the National Geochemical Database: U.S. Geological Survey, Reston, VA.	U.S. Geological Survey	USGS		18.1108	-67.1633	0.01				AAS	SEDIMENTARY	UNKNOWN	UNKNOWN	LIMESTONE																															42
AD689		USGS		Geochemistry of rock samples from the National Geochemical Database: U.S. Geological Survey, Reston, VA.	U.S. Geological Survey	USGS		18.1108	-67.1633	0.01				ES	SEDIMENTARY	UNKNOWN	UNKNOWN	LIMESTONE																									1.5	500	30		30
AGD003		USGS		Geochemistry of rock samples from the National Geochemical Database: U.S. Geological Survey, Reston, VA.	U.S. Geological Survey	USGS		67.5417	-141.509	0.01				AAS	SEDIMENTARY	UNKNOWN	UNKNOWN	LIMESTONE
AGD003		USGS		Geochemistry of rock samples from the National Geochemical Database: U.S. Geological Survey, Reston, VA.	U.S. Geological Survey	USGS		67.5417	-141.509	0.01				COL	SEDIMENTARY	UNKNOWN	UNKNOWN	LIMESTONE
AGD003		USGS		Geochemistry of rock samples from the National Geochemical Database: U.S. Geological Survey, Reston, VA.	U.S. Geological Survey	USGS		67.5417	-141.509	0.01				ES	SEDIMENTARY	UNKNOWN	UNKNOWN	LIMESTONE																									0.7	1000	10	5
AGG027		USGS		Geochemistry of rock samples from the National Geochemical Database: U.S. Geological Survey, Reston, VA.	U.S. Geological Survey	USGS		62.358	-142.675	0.01				ES	SEDIMENTARY	UNKNOWN	UNKNOWN	LIMESTONE																									10	300	70	10	70
AGG028		USGS		Geochemistry of rock samples from the National Geochemical Database: U.S. Geological Survey, Reston, VA.	U.S. Geological Survey	USGS		62.358	-142.675	0.01				ES	SEDIMENTARY	UNKNOWN	UNKNOWN	LIMESTONE																										300	100	15	100		200
AKB897		USGS		Geochemistry of rock samples from the National Geochemical Database: U.S. Geological Survey, Reston, VA.	U.S. Geological Survey	USGS		64.6044	-142.743	0.01				ES	SEDIMENTARY	UNKNOWN	UNKNOWN	LIMESTONE																									10	5000	30
AKF325		USGS		Geochemistry of rock samples from the National Geochemical Database: U.S. Geological Survey, Reston, VA.	U.S. Geological Survey	USGS		40.9294	-117.342	0.01				AAS	SEDIMENTARY	UNKNOWN	UNKNOWN	LIMESTONE																													10
AKF325		USGS		Geochemistry of rock samples from the National Geochemical Database: U.S. Geological Survey, Reston, VA.	U.S. Geological Survey	USGS		40.9294	-117.342	0.01				COL	SEDIMENTARY	UNKNOWN	UNKNOWN	LIMESTONE
AKF325		USGS		Geochemistry of rock samples from the National Geochemical Database: U.S. Geological Survey, Reston, VA.	U.S. Geological Survey	USGS		40.9294	-117.342	0.01				ES	SEDIMENTARY	UNKNOWN	UNKNOWN	LIMESTONE																									0.5	70	15	5	30
AKF326		USGS		Geochemistry of rock samples from the National Geochemical Database: U.S. Geological Survey, Reston, VA.	U.S. Geological Survey	USGS		40.9294	-117.342	0.01				COL	SEDIMENTARY	UNKNOWN	UNKNOWN	LIMESTONE
AKF326		USGS		Geochemistry of rock samples from the National Geochemical Database: U.S. Geological Survey, Reston, VA.	U.S. Geological Survey	USGS		40.9294	-117.342	0.01				ES	SEDIMENTARY	UNKNOWN	UNKNOWN	LIMESTONE																									0.15	20	10	5	30
AKF783		USGS		Geochemistry of rock samples from the National Geochemical Database: U.S. Geological Survey, Reston, VA.	U.S. Geological Survey	USGS		40.8869	-117.341	0.01				AAS	SEDIMENTARY	UNKNOWN	UNKNOWN	LIMESTONE																													29		110
AKF783		USGS		Geochemistry of rock samples from the National Geochemical Database: U.S. Geological Survey, Reston, VA.	U.S. Geological Survey	USGS		40.8869	-117.341	0.01				COL	SEDIMENTARY	UNKNOWN	UNKNOWN	LIMESTONE
AKF783		USGS		Geochemistry of rock samples from the National Geochemical Database: U.S. Geological Survey, Reston, VA.	U.S. Geological Survey	USGS		40.8869	-117.341	0.01				ES	SEDIMENTARY	UNKNOWN	UNKNOWN	LIMESTONE																									10	1500	100	7	30		200
BAF045		USGS		Geochemistry of rock samples from the National Geochemical Database: U.S. Geological Survey, Reston, VA.	U.S. Geological Survey	USGS		61.66	-143.989	0.01	59	59	59	AAS	SEDIMENTARY	UNKNOWN	UNKNOWN	LIMESTONE
BAF045		USGS		Geochemistry of rock samples from the National Geochemical Database: U.S. Geological Survey, Reston, VA.	U.S. Geological Survey	USGS		61.66	-143.989	0.01	59	59	59	ES	SEDIMENTARY	UNKNOWN	UNKNOWN	LIMESTONE																									0.15	70
BAF047		USGS		Geochemistry of rock samples from the National Geochemical Database: U.S. Geological Survey, Reston, VA.	U.S. Geological Survey	USGS		61.6764	-143.989	0.01	59	59	59	ES	SEDIMENTARY	UNKNOWN	UNKNOWN	LIMESTONE																									0.7	300			5
BAF048		USGS		Geochemistry of rock samples from the National Geochemical Database: U.S. Geological Survey, Reston, VA.	U.S. Geological Survey	USGS		61.68	-143.999	0.01	59	59	59	ES	SEDIMENTARY	UNKNOWN	UNKNOWN	LIMESTONE																										50
BAT151		USGS		Geochemistry of rock samples from the National Geochemical Database: U.S. Geological Survey, Reston, VA.	U.S. Geological Survey	USGS		58.8808	-161.5	0.01				AAS	SEDIMENTARY	UNKNOWN	UNKNOWN	LIMESTONE
BAT151		USGS		Geochemistry of rock samples from the National Geochemical Database: U.S. Geological Survey, Reston, VA.	U.S. Geological Survey	USGS		58.8808	-161.5	0.01				ES	SEDIMENTARY	UNKNOWN	UNKNOWN	LIMESTONE																									1.5	1000			5
BAT323		USGS		Geochemistry of rock samples from the National Geochemical Database: U.S. Geological Survey, Reston, VA.	U.S. Geological Survey	USGS		59.1094	-161.751	0.01				AAS	SEDIMENTARY	UNKNOWN	UNKNOWN	LIMESTONE
BAT323		USGS		Geochemistry of rock samples from the National Geochemical Database: U.S. Geological Survey, Reston, VA.	U.S. Geological Survey	USGS		59.1094	-161.751	0.01				ES	SEDIMENTARY	UNKNOWN	UNKNOWN	LIMESTONE																									7			10	70
BAT325		USGS		Geochemistry of rock samples from the National Geochemical Database: U.S. Geological Survey, Reston, VA.	U.S. Geological Survey	USGS		59.1897	-161.718	0.01				AAS	SEDIMENTARY	UNKNOWN	UNKNOWN	LIMESTONE
BAT325		USGS		Geochemistry of rock samples from the National Geochemical Database: U.S. Geological Survey, Reston, VA.	U.S. Geological Survey	USGS		59.1897	-161.718	0.01				ES	SEDIMENTARY	UNKNOWN	UNKNOWN	LIMESTONE																									0.3	300			7
BAT327		USGS		Geochemistry of rock samples from the National Geochemical Database: U.S. Geological Survey, Reston, VA.	U.S. Geological Survey	USGS		59.1983	-161.684	0.01				AAS	SEDIMENTARY	UNKNOWN	UNKNOWN	LIMESTONE
BAT327		USGS		Geochemistry of rock samples from the National Geochemical Database: U.S. Geological Survey, Reston, VA.	U.S. Geological Survey	USGS		59.1983	-161.684	0.01				ES	SEDIMENTARY	UNKNOWN	UNKNOWN	LIMESTONE																									0.2	70			5
BAT337		USGS		Geochemistry of rock samples from the National Geochemical Database: U.S. Geological Survey, Reston, VA.	U.S. Geological Survey	USGS		58.9372	-161.484	0.01				AAS	SEDIMENTARY	UNKNOWN	UNKNOWN	LIMESTONE
BAT337		USGS		Geochemistry of rock samples from the National Geochemical Database: U.S. Geological Survey, Reston, VA.	U.S. Geological Survey	USGS		58.9372	-161.484	0.01				ES	SEDIMENTARY	UNKNOWN	UNKNOWN	LIMESTONE																									5	700	30	20	50
BAT409		USGS		Geochemistry of rock samples from the National Geochemical Database: U.S. Geological Survey, Reston, VA.	U.S. Geological Survey	USGS		58.8986	-161.481	0.01				AAS	SEDIMENTARY	UNKNOWN	UNKNOWN	LIMESTONE
BAT409		USGS		Geochemistry of rock samples from the National Geochemical Database: U.S. Geological Survey, Reston, VA.	U.S. Geological Survey	USGS		58.8986	-161.481	0.01				ES	SEDIMENTARY	UNKNOWN	UNKNOWN	LIMESTONE																									5	1500	50	15	70
BAT441		USGS		Geochemistry of rock samples from the National Geochemical Database: U.S. Geological Survey, Reston, VA.	U.S. Geological Survey	USGS		58.9661	-161.332	0.01				AAS	SEDIMENTARY	UNKNOWN	UNKNOWN	LIMESTONE
BAT441		USGS		Geochemistry of rock samples from the National Geochemical Database: U.S. Geological Survey, Reston, VA.	U.S. Geological Survey	USGS		58.9661	-161.332	0.01				ES	SEDIMENTARY	UNKNOWN	UNKNOWN	LIMESTONE																									5	1000	30	20	70
BAT593		USGS		Geochemistry of rock samples from the National Geochemical Database: U.S. Geological Survey, Reston, VA.	U.S. Geological Survey	USGS		59.0303	-161.698	0.01				AAS	SEDIMENTARY	UNKNOWN	UNKNOWN	LIMESTONE
BAT593		USGS		Geochemistry of rock samples from the National Geochemical Database: U.S. Geological Survey, Reston, VA.	U.S. Geological Survey	USGS		59.0303	-161.698	0.01				ES	SEDIMENTARY	UNKNOWN	UNKNOWN	LIMESTONE																									2	700	30		7
BAT812		USGS		Geochemistry of rock samples from the National Geochemical Database: U.S. Geological Survey, Reston, VA.	U.S. Geological Survey	USGS		59.1678	-161.763	0.01				AAS	SEDIMENTARY	UNKNOWN	UNKNOWN	LIMESTONE
BAT812		USGS		Geochemistry of rock samples from the National Geochemical Database: U.S. Geological Survey, Reston, VA.	U.S. Geological Survey	USGS		59.1678	-161.763	0.01				ES	SEDIMENTARY	UNKNOWN	UNKNOWN	LIMESTONE																									0.7	150			5
BAT911		USGS		Geochemistry of rock samples from the National Geochemical Database: U.S. Geological Survey, Reston, VA.	U.S. Geological Survey	USGS		59.2261	-161.616	0.01				AAS	SEDIMENTARY	UNKNOWN	UNKNOWN	LIMESTONE
BAT911		USGS		Geochemistry of rock samples from the National Geochemical Database: U.S. Geological Survey, Reston, VA.	U.S. Geological Survey	USGS		59.2261	-161.616	0.01				ES	SEDIMENTARY	UNKNOWN	UNKNOWN	LIMESTONE																									2	700	50	10	30
BAT912		USGS		Geochemistry of rock samples from the National Geochemical Database: U.S. Geological Survey, Reston, VA.	U.S. Geological Survey	USGS		59.2261	-161.616	0.01				AAS	SEDIMENTARY	UNKNOWN	UNKNOWN	LIMESTONE
BAT912		USGS		Geochemistry of rock samples from the National Geochemical Database: U.S. Geological Survey, Reston, VA.	U.S. Geological Survey	USGS		59.2261	-161.616	0.01				ES	SEDIMENTARY	UNKNOWN	UNKNOWN	LIMESTONE																									2	700	30	10	20
BAT972		USGS		Geochemistry of rock samples from the National Geochemical Database: U.S. Geological Survey, Reston, VA.	U.S. Geological Survey	USGS		55	-133	0.01				AAS	SEDIMENTARY	UNKNOWN	UNKNOWN	LIMESTONE
BAT972		USGS		Geochemistry of rock samples from the National Geochemical Database: U.S. Geological Survey, Reston, VA.	U.S. Geological Survey	USGS		55	-133	0.01				ES	SEDIMENTARY	UNKNOWN	UNKNOWN	LIMESTONE																									15	1500	100	30	2000		300
BBD615		USGS		Geochemistry of rock samples from the National Geochemical Database: U.S. Geological Survey, Reston, VA.	U.S. Geological Survey	USGS		45.0506	-109.995	0.01	67	67	67	COL	SEDIMENTARY	UNKNOWN	UNKNOWN	LIMESTONE
BBD615		USGS		Geochemistry of rock samples from the National Geochemical Database: U.S. Geological Survey, Reston, VA.	U.S. Geological Survey	USGS		45.0506	-109.995	0.01	67	67	67	ES	SEDIMENTARY	UNKNOWN	UNKNOWN	LIMESTONE																									0.5	2000	5		15		500
BBD616		USGS		Geochemistry of rock samples from the National Geochemical Database: U.S. Geological Survey, Reston, VA.	U.S. Geological Survey	USGS		45.0547	-109.997	0.01	67	67	67	AAS	SEDIMENTARY	UNKNOWN	UNKNOWN	LIMESTONE
BBD616		USGS		Geochemistry of rock samples from the National Geochemical Database: U.S. Geological Survey, Reston, VA.	U.S. Geological Survey	USGS		45.0547	-109.997	0.01	67	67	67	COL	SEDIMENTARY	UNKNOWN	UNKNOWN	LIMESTONE
BBD616		USGS		Geochemistry of rock samples from the National Geochemical Database: U.S. Geological Survey, Reston, VA.	U.S. Geological Survey	USGS		45.0547	-109.997	0.01	67	67	67	ES	SEDIMENTARY	UNKNOWN	UNKNOWN	LIMESTONE																									0.2				5
BBD622		USGS		Geochemistry of rock samples from the National Geochemical Database: U.S. Geological Survey, Reston, VA.	U.S. Geological Survey	USGS		45.0542	-110.992	0.01	67	67	67	ES	SEDIMENTARY	UNKNOWN	UNKNOWN	LIMESTONE																									0.3	5000			20		1000
BBD694		USGS		Geochemistry of rock samples from the National Geochemical Database: U.S. Geological Survey, Reston, VA.	U.S. Geological Survey	USGS		45.075	-110.008	0.01	67	67	67	AAS	SEDIMENTARY	UNKNOWN	UNKNOWN	LIMESTONE
BBD694		USGS		Geochemistry of rock samples from the National Geochemical Database: U.S. Geological Survey, Reston, VA.	U.S. Geological Survey	USGS		45.075	-110.008	0.01	67	67	67	COL	SEDIMENTARY	UNKNOWN	UNKNOWN	LIMESTONE
BBD694		USGS		Geochemistry of rock samples from the National Geochemical Database: U.S. Geological Survey, Reston, VA.	U.S. Geological Survey	USGS		45.075	-110.008	0.01	67	67	67	ES	SEDIMENTARY	UNKNOWN	UNKNOWN	LIMESTONE																									0.3				10
BBD705		USGS		Geochemistry of rock samples from the National Geochemical Database: U.S. Geological Survey, Reston, VA.	U.S. Geological Survey	USGS		45.0733	-110.14	0.01	67	67	67	ES	SEDIMENTARY	UNKNOWN	UNKNOWN	LIMESTONE																									2	150			5
BBD707		USGS		Geochemistry of rock samples from the National Geochemical Database: U.S. Geological Survey, Reston, VA.	U.S. Geological Survey	USGS		45.0744	-110.008	0.01	67	67	67	COL	SEDIMENTARY	UNKNOWN	UNKNOWN	LIMESTONE
BBD707		USGS		Geochemistry of rock samples from the National Geochemical Database: U.S. Geological Survey, Reston, VA.	U.S. Geological Survey	USGS		45.0744	-110.008	0.01	67	67	67	ES	SEDIMENTARY	UNKNOWN	UNKNOWN	LIMESTONE																									0.5				5
BCO435		USGS		Geochemistry of rock samples from the National Geochemical Database: U.S. Geological Survey, Reston, VA.	U.S. Geological Survey	USGS		37.7819	-107.656	0.01	68	68	68	AAS	SEDIMENTARY	UNKNOWN	UNKNOWN	LIMESTONE																													10		30
BCO435		USGS		Geochemistry of rock samples from the National Geochemical Database: U.S. Geological Survey, Reston, VA.	U.S. Geological Survey	USGS		37.7819	-107.656	0.01	68	68	68	COL	SEDIMENTARY	UNKNOWN	UNKNOWN	LIMESTONE
BCO435		USGS		Geochemistry of rock samples from the National Geochemical Database: U.S. Geological Survey, Reston, VA.	U.S. Geological Survey	USGS		37.7819	-107.656	0.01	68	68	68	ES	SEDIMENTARY	UNKNOWN	UNKNOWN	LIMESTONE																									0.2	700	5	5	50
BCO436		USGS		Geochemistry of rock samples from the National Geochemical Database: U.S. Geological Survey, Reston, VA.	U.S. Geological Survey	USGS		37.7819	-107.656	0.01	68	68	68	AAS	SEDIMENTARY	UNKNOWN	UNKNOWN	LIMESTONE																													20		200
BCO436		USGS		Geochemistry of rock samples from the National Geochemical Database: U.S. Geological Survey, Reston, VA.	U.S. Geological Survey	USGS		37.7819	-107.656	0.01	68	68	68	COL	SEDIMENTARY	UNKNOWN	UNKNOWN	LIMESTONE
BCO436		USGS		Geochemistry of rock samples from the National Geochemical Database: U.S. Geological Survey, Reston, VA.	U.S. Geological Survey	USGS		37.7819	-107.656	0.01	68	68	68	ES	SEDIMENTARY	UNKNOWN	UNKNOWN	LIMESTONE																									0.5	500	10	10	30		200
BCO500		USGS		Geochemistry of rock samples from the National Geochemical Database: U.S. Geological Survey, Reston, VA.	U.S. Geological Survey	USGS		37.8425	-107.836	0.01	56	56	56	AAS	SEDIMENTARY	UNKNOWN	UNKNOWN	LIMESTONE																													9000		40
BCO500		USGS		Geochemistry of rock samples from the National Geochemical Database: U.S. Geological Survey, Reston, VA.	U.S. Geological Survey	USGS		37.8425	-107.836	0.01	56	56	56	COL	SEDIMENTARY	UNKNOWN	UNKNOWN	LIMESTONE
BCO500		USGS		Geochemistry of rock samples from the National Geochemical Database: U.S. Geological Survey, Reston, VA.	U.S. Geological Survey	USGS		37.8425	-107.836	0.01	56	56	56	ES	SEDIMENTARY	UNKNOWN	UNKNOWN	LIMESTONE																									0.2	2000	5		7000
BCO795		USGS		Geochemistry of rock samples from the National Geochemical Database: U.S. Geological Survey, Reston, VA.	U.S. Geological Survey	USGS		64.2908	-146.417	0.01				ES	SEDIMENTARY	UNKNOWN	UNKNOWN	LIMESTONE																									1	700	15	10	7
BCO824		USGS		Geochemistry of rock samples from the National Geochemical Database: U.S. Geological Survey, Reston, VA.	U.S. Geological Survey	USGS		63.2325	-145.485	0.01				AAS	SEDIMENTARY	UNKNOWN	UNKNOWN	LIMESTONE
BCO824		USGS		Geochemistry of rock samples from the National Geochemical Database: U.S. Geological Survey, Reston, VA.	U.S. Geological Survey	USGS		63.2325	-145.485	0.01				ES	SEDIMENTARY	UNKNOWN	UNKNOWN	LIMESTONE																									0.7	300	5		30
BCO825		USGS		Geochemistry of rock samples from the National Geochemical Database: U.S. Geological Survey, Reston, VA.	U.S. Geological Survey	USGS		63.5605	-145.992	0.01				AAS	SEDIMENTARY	UNKNOWN	UNKNOWN	LIMESTONE
BCO825		USGS		Geochemistry of rock samples from the National Geochemical Database: U.S. Geological Survey, Reston, VA.	U.S. Geological Survey	USGS		63.5605	-145.992	0.01				ES	SEDIMENTARY	UNKNOWN	UNKNOWN	LIMESTONE																									5	5000	10	70	70
BCO826		USGS		Geochemistry of rock samples from the National Geochemical Database: U.S. Geological Survey, Reston, VA.	U.S. Geological Survey	USGS		63.5605	-145.992	0.01				AAS	SEDIMENTARY	UNKNOWN	UNKNOWN	LIMESTONE
BCO826		USGS		Geochemistry of rock samples from the National Geochemical Database: U.S. Geological Survey, Reston, VA.	U.S. Geological Survey	USGS		63.5605	-145.992	0.01				ES	SEDIMENTARY	UNKNOWN	UNKNOWN	LIMESTONE																									3	3000	5	10	50
BDB708		USGS		Geochemistry of rock samples from the National Geochemical Database: U.S. Geological Survey, Reston, VA.	U.S. Geological Survey	USGS		55.3819	-131.856	0.01	55	55	55	AAS	SEDIMENTARY	UNKNOWN	UNKNOWN	LIMESTONE
BDB708		USGS		Geochemistry of rock samples from the National Geochemical Database: U.S. Geological Survey, Reston, VA.	U.S. Geological Survey	USGS		55.3819	-131.856	0.01	55	55	55	ES	SEDIMENTARY	UNKNOWN	UNKNOWN	LIMESTONE																									3	300	7	10	20000
BDB716		USGS		Geochemistry of rock samples from the National Geochemical Database: U.S. Geological Survey, Reston, VA.	U.S. Geological Survey	USGS		55.1597	-131.792	0.01				AAS	SEDIMENTARY	UNKNOWN	UNKNOWN	LIMESTONE
BDB716		USGS		Geochemistry of rock samples from the National Geochemical Database: U.S. Geological Survey, Reston, VA.	U.S. Geological Survey	USGS		55.1597	-131.792	0.01				ES	SEDIMENTARY	UNKNOWN	UNKNOWN	LIMESTONE																									10			7	30
BDP301		USGS		Geochemistry of rock samples from the National Geochemical Database: U.S. Geological Survey, Reston, VA.	U.S. Geological Survey	USGS		64.75	-144.5	0.01				AAS	SEDIMENTARY	UNKNOWN	UNKNOWN	LIMESTONE
BDP301		USGS		Geochemistry of rock samples from the National Geochemical Database: U.S. Geological Survey, Reston, VA.	U.S. Geological Survey	USGS		64.75	-144.5	0.01				ES	SEDIMENTARY	UNKNOWN	UNKNOWN	LIMESTONE																									2	300	15		7
BDP303		USGS		Geochemistry of rock samples from the National Geochemical Database: U.S. Geological Survey, Reston, VA.	U.S. Geological Survey	USGS		64.75	-144.5	0.01				AAS	SEDIMENTARY	UNKNOWN	UNKNOWN	LIMESTONE
BDP303		USGS		Geochemistry of rock samples from the National Geochemical Database: U.S. Geological Survey, Reston, VA.	U.S. Geological Survey	USGS		64.75	-144.5	0.01				ES	SEDIMENTARY	UNKNOWN	UNKNOWN	LIMESTONE																									5	1000	50	15	7
BDP304		USGS		Geochemistry of rock samples from the National Geochemical Database: U.S. Geological Survey, Reston, VA.	U.S. Geological Survey	USGS		64.75	-144.5	0.01				AAS	SEDIMENTARY	UNKNOWN	UNKNOWN	LIMESTONE
BDP304		USGS		Geochemistry of rock samples from the National Geochemical Database: U.S. Geological Survey, Reston, VA.	U.S. Geological Survey	USGS		64.75	-144.5	0.01				ES	SEDIMENTARY	UNKNOWN	UNKNOWN	LIMESTONE																									0.5	1000			7
BDP370		USGS		Geochemistry of rock samples from the National Geochemical Database: U.S. Geological Survey, Reston, VA.	U.S. Geological Survey	USGS		64.75	-144.5	0.01				AAS	SEDIMENTARY	UNKNOWN	UNKNOWN	LIMESTONE
BDP370		USGS		Geochemistry of rock samples from the National Geochemical Database: U.S. Geological Survey, Reston, VA.	U.S. Geological Survey	USGS		64.75	-144.5	0.01				ES	SEDIMENTARY	UNKNOWN	UNKNOWN	LIMESTONE																									1.5	1000	150
BDQ005		USGS		Geochemistry of rock samples from the National Geochemical Database: U.S. Geological Survey, Reston, VA.	U.S. Geological Survey	USGS		60.4833	-146.583	0.01				ES	SEDIMENTARY	UNKNOWN	UNKNOWN	LIMESTONE																									5	1000	50	15	7
BDQ008		USGS		Geochemistry of rock samples from the National Geochemical Database: U.S. Geological Survey, Reston, VA.	U.S. Geological Survey	USGS		60.4833	-146.603	0.01				ES	SEDIMENTARY	UNKNOWN	UNKNOWN	LIMESTONE																									3	3000	15	10	10
BDQ030		USGS		Geochemistry of rock samples from the National Geochemical Database: U.S. Geological Survey, Reston, VA.	U.S. Geological Survey	USGS		60.4806	-146.617	0.01				ES	SEDIMENTARY	UNKNOWN	UNKNOWN	LIMESTONE																									15	3000	50	7	100
BEC828		USGS		Geochemistry of rock samples from the National Geochemical Database: U.S. Geological Survey, Reston, VA.	U.S. Geological Survey	USGS		43.9458	-114.761	0.01	70	70	70	AAS	SEDIMENTARY	UNKNOWN	UNKNOWN	LIMESTONE																													15		20
BEC828		USGS		Geochemistry of rock samples from the National Geochemical Database: U.S. Geological Survey, Reston, VA.	U.S. Geological Survey	USGS		43.9458	-114.761	0.01	70	70	70	COL	SEDIMENTARY	UNKNOWN	UNKNOWN	LIMESTONE
BEC828		USGS		Geochemistry of rock samples from the National Geochemical Database: U.S. Geological Survey, Reston, VA.	U.S. Geological Survey	USGS		43.9458	-114.761	0.01	70	70	70	ES	SEDIMENTARY	UNKNOWN	UNKNOWN	LIMESTONE																									2	150	30	5	15
BGR265		USGS		Geochemistry of rock samples from the National Geochemical Database: U.S. Geological Survey, Reston, VA.	U.S. Geological Survey	USGS		43.8764	-114.436	0.01				AAS	SEDIMENTARY	UNKNOWN	UNKNOWN	LIMESTONE																													40		65
BGR265		USGS		Geochemistry of rock samples from the National Geochemical Database: U.S. Geological Survey, Reston, VA.	U.S. Geological Survey	USGS		43.8764	-114.436	0.01				COL	SEDIMENTARY	UNKNOWN	UNKNOWN	LIMESTONE
BGR265		USGS		Geochemistry of rock samples from the National Geochemical Database: U.S. Geological Survey, Reston, VA.	U.S. Geological Survey	USGS		43.8764	-114.436	0.01				ES	SEDIMENTARY	UNKNOWN	UNKNOWN	LIMESTONE																									5	500	50	10	20
BGR272		USGS		Geochemistry of rock samples from the National Geochemical Database: U.S. Geological Survey, Reston, VA.	U.S. Geological Survey	USGS		43.9369	-114.67	0.01				AAS	SEDIMENTARY	UNKNOWN	UNKNOWN	LIMESTONE																															100
BGR272		USGS		Geochemistry of rock samples from the National Geochemical Database: U.S. Geological Survey, Reston, VA.	U.S. Geological Survey	USGS		43.9369	-114.67	0.01				COL	SEDIMENTARY	UNKNOWN	UNKNOWN	LIMESTONE
BGR272		USGS		Geochemistry of rock samples from the National Geochemical Database: U.S. Geological Survey, Reston, VA.	U.S. Geological Survey	USGS		43.9369	-114.67	0.01				ES	SEDIMENTARY	UNKNOWN	UNKNOWN	LIMESTONE																									0.7	500	5		30
BGR273		USGS		Geochemistry of rock samples from the National Geochemical Database: U.S. Geological Survey, Reston, VA.	U.S. Geological Survey	USGS		43.9375	-114.667	0.01				AAS	SEDIMENTARY	UNKNOWN	UNKNOWN	LIMESTONE																													5		15
BGR273		USGS		Geochemistry of rock samples from the National Geochemical Database: U.S. Geological Survey, Reston, VA.	U.S. Geological Survey	USGS		43.9375	-114.667	0.01				ES	SEDIMENTARY	UNKNOWN	UNKNOWN	LIMESTONE																									0.2	2000	5		5
BHA227		USGS		Geochemistry of rock samples from the National Geochemical Database: U.S. Geological Survey, Reston, VA.	U.S. Geological Survey	USGS		35.75	-109.03	0.01	56	56	56	AAS	SEDIMENTARY	UNKNOWN	UNKNOWN	LIMESTONE																													15
BHA227		USGS		Geochemistry of rock samples from the National Geochemical Database: U.S. Geological Survey, Reston, VA.	U.S. Geological Survey	USGS		35.75	-109.03	0.01	56	56	56	ES	SEDIMENTARY	UNKNOWN	UNKNOWN	LIMESTONE																								3	0.3	3000			1.5
C100708		USGS		Geochemistry of rock samples from the National Geochemical Database: U.S. Geological Survey, Reston, VA.	U.S. Geological Survey	USGS		65.5394	-167.437	0.01				AAS	SEDIMENTARY	UNKNOWN	UNKNOWN	LIMESTONE
C100708		USGS		Geochemistry of rock samples from the National Geochemical Database: U.S. Geological Survey, Reston, VA.	U.S. Geological Survey	USGS		65.5394	-167.437	0.01				ICPAES	SEDIMENTARY	UNKNOWN	UNKNOWN	LIMESTONE																									0.29	90			1.4		4.4
C100708		USGS		Geochemistry of rock samples from the National Geochemical Database: U.S. Geological Survey, Reston, VA.	U.S. Geological Survey	USGS		65.5394	-167.437	0.01				NAA	SEDIMENTARY	UNKNOWN	UNKNOWN	LIMESTONE
C101222		USGS		Geochemistry of rock samples from the National Geochemical Database: U.S. Geological Survey, Reston, VA.	U.S. Geological Survey	USGS		32.4703	-106.901	0.01				FAP	SEDIMENTARY	UNKNOWN	UNKNOWN	LIMESTONE
C101222		USGS		Geochemistry of rock samples from the National Geochemical Database: U.S. Geological Survey, Reston, VA.	U.S. Geological Survey	USGS		32.4703	-106.901	0.01				ICPAES	SEDIMENTARY	UNKNOWN	UNKNOWN	LIMESTONE																									0.32	240	4
C101223		USGS		Geochemistry of rock samples from the National Geochemical Database: U.S. Geological Survey, Reston, VA.	U.S. Geological Survey	USGS		32.4739	-106.099	0.01				ICPAES	SEDIMENTARY	UNKNOWN	UNKNOWN	LIMESTONE																									0.71	398	3				4
C102120		USGS		Geochemistry of rock samples from the National Geochemical Database: U.S. Geological Survey, Reston, VA.	U.S. Geological Survey	USGS		63.8744	-153.017	0.01				AAS	SEDIMENTARY	UNKNOWN	UNKNOWN	LIMESTONE
C102120		USGS		Geochemistry of rock samples from the National Geochemical Database: U.S. Geological Survey, Reston, VA.	U.S. Geological Survey	USGS		63.8744	-153.017	0.01				COL	SEDIMENTARY	UNKNOWN	UNKNOWN	LIMESTONE
C102120		USGS		Geochemistry of rock samples from the National Geochemical Database: U.S. Geological Survey, Reston, VA.	U.S. Geological Survey	USGS		63.8744	-153.017	0.01				ICPAES	SEDIMENTARY	UNKNOWN	UNKNOWN	LIMESTONE																									0.25	94	4		2.5		2.6
C120419		USGS		Geochemistry of rock samples from the National Geochemical Database: U.S. Geological Survey, Reston, VA.	U.S. Geological Survey	USGS		42.8844	-111.441	0.01	71	71	71	AAS	SEDIMENTARY	UNKNOWN	UNKNOWN	LIMESTONE
C120419		USGS		Geochemistry of rock samples from the National Geochemical Database: U.S. Geological Survey, Reston, VA.	U.S. Geological Survey	USGS		42.8844	-111.441	0.01	71	71	71	ICPAES	SEDIMENTARY	UNKNOWN	UNKNOWN	LIMESTONE																									2.19	322	153	7	17	2	1320
C209296		USGS		Geochemistry of rock samples from the National Geochemical Database: U.S. Geological Survey, Reston, VA.	U.S. Geological Survey	USGS		43.816	-72.316	0.01				ICPAES	SEDIMENTARY	UNKNOWN	UNKNOWN	LIMESTONE																									0.13	124	3				18
C209296		USGS		Geochemistry of rock samples from the National Geochemical Database: U.S. Geological Survey, Reston, VA.	U.S. Geological Survey	USGS		43.816	-72.316	0.01				MISC	SEDIMENTARY	UNKNOWN	UNKNOWN	LIMESTONE																		43.4
C209296		USGS		Geochemistry of rock samples from the National Geochemical Database: U.S. Geological Survey, Reston, VA.	U.S. Geological Survey	USGS		43.816	-72.316	0.01				MS	SEDIMENTARY	UNKNOWN	UNKNOWN	LIMESTONE																									0.17	94	1.3				9
C209296		USGS		Geochemistry of rock samples from the National Geochemical Database: U.S. Geological Survey, Reston, VA.	U.S. Geological Survey	USGS		43.816	-72.316	0.01				XRF	SEDIMENTARY	UNKNOWN	UNKNOWN	LIMESTONE		1.16		0.26						0.01	3.66	50.6			0.14
C209299		USGS		Geochemistry of rock samples from the National Geochemical Database: U.S. Geological Survey, Reston, VA.	U.S. Geological Survey	USGS		43.816	-72.316	0.01				ICPAES	SEDIMENTARY	UNKNOWN	UNKNOWN	LIMESTONE																									23.1	25	17	41	7600	6.5	301
C209299		USGS		Geochemistry of rock samples from the National Geochemical Database: U.S. Geological Survey, Reston, VA.	U.S. Geological Survey	USGS		43.816	-72.316	0.01				MS	SEDIMENTARY	UNKNOWN	UNKNOWN	LIMESTONE																									19	29	5.4	20	6200	1.6	230
C209300		USGS		Geochemistry of rock samples from the National Geochemical Database: U.S. Geological Survey, Reston, VA.	U.S. Geological Survey	USGS		43.816	-72.316	0.01				ICPAES	SEDIMENTARY	UNKNOWN	UNKNOWN	LIMESTONE																									15.1	50	19	39	37600	8.1	813
C209300		USGS		Geochemistry of rock samples from the National Geochemical Database: U.S. Geological Survey, Reston, VA.	U.S. Geological Survey	USGS		43.816	-72.316	0.01				MS	SEDIMENTARY	UNKNOWN	UNKNOWN	LIMESTONE																									13	46	9	24	30000	4.3	600
C209301		USGS		Geochemistry of rock samples from the National Geochemical Database: U.S. Geological Survey, Reston, VA.	U.S. Geological Survey	USGS		43.816	-72.316	0.01				ICPAES	SEDIMENTARY	UNKNOWN	UNKNOWN	LIMESTONE																									11.6	97	52	111	55100	28	4070
C209301		USGS		Geochemistry of rock samples from the National Geochemical Database: U.S. Geological Survey, Reston, VA.	U.S. Geological Survey	USGS		43.816	-72.316	0.01				MS	SEDIMENTARY	UNKNOWN	UNKNOWN	LIMESTONE																									9.9	83	40	96	43000	23	3600
C209302		USGS		Geochemistry of rock samples from the National Geochemical Database: U.S. Geological Survey, Reston, VA.	U.S. Geological Survey	USGS		43.816	-72.316	0.01				ICPAES	SEDIMENTARY	UNKNOWN	UNKNOWN	LIMESTONE																									9.9	107	52	109	52600	29	4010
C209302		USGS		Geochemistry of rock samples from the National Geochemical Database: U.S. Geological Survey, Reston, VA.	U.S. Geological Survey	USGS		43.816	-72.316	0.01				MS	SEDIMENTARY	UNKNOWN	UNKNOWN	LIMESTONE																									8	92	38	90	38000	23	3300
C209303		USGS		Geochemistry of rock samples from the National Geochemical Database: U.S. Geological Survey, Reston, VA.	U.S. Geological Survey	USGS		43.816	-72.316	0.01				ICPAES	SEDIMENTARY	UNKNOWN	UNKNOWN	LIMESTONE																									9	111	51	110	50000	30	4010
C209303		USGS		Geochemistry of rock samples from the National Geochemical Database: U.S. Geological Survey, Reston, VA.	U.S. Geological Survey	USGS		43.816	-72.316	0.01				MS	SEDIMENTARY	UNKNOWN	UNKNOWN	LIMESTONE																									7.4	91	39	92	37000	24	3300
C209304		USGS		Geochemistry of rock samples from the National Geochemical Database: U.S. Geological Survey, Reston, VA.	U.S. Geological Survey	USGS		43.816	-72.316	0.01				ICPAES	SEDIMENTARY	UNKNOWN	UNKNOWN	LIMESTONE																									5.9	128	39	90	35000	23	3210
C209304		USGS		Geochemistry of rock samples from the National Geochemical Database: U.S. Geological Survey, Reston, VA.	U.S. Geological Survey	USGS		43.816	-72.316	0.01				MS	SEDIMENTARY	UNKNOWN	UNKNOWN	LIMESTONE																									3.7	100	24	58	19000	16	1900
C209305		USGS		Geochemistry of rock samples from the National Geochemical Database: U.S. Geological Survey, Reston, VA.	U.S. Geological Survey	USGS		43.816	-72.316	0.01				ICPAES	SEDIMENTARY	UNKNOWN	UNKNOWN	LIMESTONE																									1.7	144	13	31	10700	10	1160
C209305		USGS		Geochemistry of rock samples from the National Geochemical Database: U.S. Geological Survey, Reston, VA.	U.S. Geological Survey	USGS		43.816	-72.316	0.01				MS	SEDIMENTARY	UNKNOWN	UNKNOWN	LIMESTONE																									1.8	130	7.4	31	9200	9.9	1000
C209306		USGS		Geochemistry of rock samples from the National Geochemical Database: U.S. Geological Survey, Reston, VA.	U.S. Geological Survey	USGS		43.816	-72.316	0.01				ICPAES	SEDIMENTARY	UNKNOWN	UNKNOWN	LIMESTONE																									1.1	151	9.9	24	6700	7.5	810
C209306		USGS		Geochemistry of rock samples from the National Geochemical Database: U.S. Geological Survey, Reston, VA.	U.S. Geological Survey	USGS		43.816	-72.316	0.01				MS	SEDIMENTARY	UNKNOWN	UNKNOWN	LIMESTONE																									1.1	140	4.1	24	5800	7.3	720
C209316		USGS		Geochemistry of rock samples from the National Geochemical Database: U.S. Geological Survey, Reston, VA.	U.S. Geological Survey	USGS		43.816	-72.316	0.01				ICPAES	SEDIMENTARY	UNKNOWN	UNKNOWN	LIMESTONE																									21.9	22	15	38	9100	6.7	287
C209316		USGS		Geochemistry of rock samples from the National Geochemical Database: U.S. Geological Survey, Reston, VA.	U.S. Geological Survey	USGS		43.816	-72.316	0.01				MS	SEDIMENTARY	UNKNOWN	UNKNOWN	LIMESTONE																									18	27	5.1	19	6700	1.5	210
C209317		USGS		Geochemistry of rock samples from the National Geochemical Database: U.S. Geological Survey, Reston, VA.	U.S. Geological Survey	USGS		43.816	-72.316	0.01				ICPAES	SEDIMENTARY	UNKNOWN	UNKNOWN	LIMESTONE																									20.3	32	18	42	14000	7.2	401
C209317		USGS		Geochemistry of rock samples from the National Geochemical Database: U.S. Geological Survey, Reston, VA.	U.S. Geological Survey	USGS		43.816	-72.316	0.01				MS	SEDIMENTARY	UNKNOWN	UNKNOWN	LIMESTONE																									16	33	6.6	21	9800	1.9	280
C209318		USGS		Geochemistry of rock samples from the National Geochemical Database: U.S. Geological Survey, Reston, VA.	U.S. Geological Survey	USGS		43.816	-72.316	0.01				ICPAES	SEDIMENTARY	UNKNOWN	UNKNOWN	LIMESTONE																									12	82	40	84	55600	24	3240
C209318		USGS		Geochemistry of rock samples from the National Geochemical Database: U.S. Geological Survey, Reston, VA.	U.S. Geological Survey	USGS		43.816	-72.316	0.01				MS	SEDIMENTARY	UNKNOWN	UNKNOWN	LIMESTONE																									10	72	30	68	45000	19	2800
C209319		USGS		Geochemistry of rock samples from the National Geochemical Database: U.S. Geological Survey, Reston, VA.	U.S. Geological Survey	USGS		43.816	-72.316	0.01				ICPAES	SEDIMENTARY	UNKNOWN	UNKNOWN	LIMESTONE																									10.2	100	50	105	53800	30	4050
C209319		USGS		Geochemistry of rock samples from the National Geochemical Database: U.S. Geological Survey, Reston, VA.	U.S. Geological Survey	USGS		43.816	-72.316	0.01				MS	SEDIMENTARY	UNKNOWN	UNKNOWN	LIMESTONE																									8.5	85	38	88	41000	23	3500
C209320		USGS		Geochemistry of rock samples from the National Geochemical Database: U.S. Geological Survey, Reston, VA.	U.S. Geological Survey	USGS		43.816	-72.316	0.01				ICPAES	SEDIMENTARY	UNKNOWN	UNKNOWN	LIMESTONE																									8.2	115	48	102	46300	26	3780
C209320		USGS		Geochemistry of rock samples from the National Geochemical Database: U.S. Geological Survey, Reston, VA.	U.S. Geological Survey	USGS		43.816	-72.316	0.01				MS	SEDIMENTARY	UNKNOWN	UNKNOWN	LIMESTONE																									6.6	99	36	83	32000	21	3000
C209321		USGS		Geochemistry of rock samples from the National Geochemical Database: U.S. Geological Survey, Reston, VA.	U.S. Geological Survey	USGS		43.816	-72.316	0.01				ICPAES	SEDIMENTARY	UNKNOWN	UNKNOWN	LIMESTONE																									5.5	124	36	82	32400	21	3030
C209321		USGS		Geochemistry of rock samples from the National Geochemical Database: U.S. Geological Survey, Reston, VA.	U.S. Geological Survey	USGS		43.816	-72.316	0.01				MS	SEDIMENTARY	UNKNOWN	UNKNOWN	LIMESTONE																									4.3	100	28	66	22000	18	2300
C209322		USGS		Geochemistry of rock samples from the National Geochemical Database: U.S. Geological Survey, Reston, VA.	U.S. Geological Survey	USGS		43.816	-72.316	0.01				ICPAES	SEDIMENTARY	UNKNOWN	UNKNOWN	LIMESTONE																									1.8	144	13	32	10900	11	1220
C209322		USGS		Geochemistry of rock samples from the National Geochemical Database: U.S. Geological Survey, Reston, VA.	U.S. Geological Survey	USGS		43.816	-72.316	0.01				MS	SEDIMENTARY	UNKNOWN	UNKNOWN	LIMESTONE																									1.6	120	11	28	7900	10	910
C209323		USGS		Geochemistry of rock samples from the National Geochemical Database: U.S. Geological Survey, Reston, VA.	U.S. Geological Survey	USGS		43.816	-72.316	0.01				ICPAES	SEDIMENTARY	UNKNOWN	UNKNOWN	LIMESTONE																									1.2	149	9.6	23	7030	7.6	796
C209323		USGS		Geochemistry of rock samples from the National Geochemical Database: U.S. Geological Survey, Reston, VA.	U.S. Geological Survey	USGS		43.816	-72.316	0.01				MS	SEDIMENTARY	UNKNOWN	UNKNOWN	LIMESTONE																									1.1	120	9	21	5200	7.2	610
C224195		USGS		Geochemistry of rock samples from the National Geochemical Database: U.S. Geological Survey, Reston, VA.	U.S. Geological Survey	USGS		33.2039	-111.057	0.01				ICPAES	SEDIMENTARY	UNKNOWN	UNKNOWN	LIMESTONE																									0.45	1540	2.8	1.1			9.7
C224195		USGS		Geochemistry of rock samples from the National Geochemical Database: U.S. Geological Survey, Reston, VA.	U.S. Geological Survey	USGS		33.2039	-111.057	0.01				ISE	SEDIMENTARY	UNKNOWN	UNKNOWN	LIMESTONE
C224195		USGS		Geochemistry of rock samples from the National Geochemical Database: U.S. Geological Survey, Reston, VA.	U.S. Geological Survey	USGS		33.2039	-111.057	0.01				MISC	SEDIMENTARY	UNKNOWN	UNKNOWN	LIMESTONE																		42.8
C224195		USGS		Geochemistry of rock samples from the National Geochemical Database: U.S. Geological Survey, Reston, VA.	U.S. Geological Survey	USGS		33.2039	-111.057	0.01				MS	SEDIMENTARY	UNKNOWN	UNKNOWN	LIMESTONE																								5	0.447	1360			1.5	0.01	6
C224195		USGS		Geochemistry of rock samples from the National Geochemical Database: U.S. Geological Survey, Reston, VA.	U.S. Geological Survey	USGS		33.2039	-111.057	0.01				TITR	SEDIMENTARY	UNKNOWN	UNKNOWN	LIMESTONE								0.35
C224195		USGS		Geochemistry of rock samples from the National Geochemical Database: U.S. Geological Survey, Reston, VA.	U.S. Geological Survey	USGS		33.2039	-111.057	0.01				XRF	SEDIMENTARY	UNKNOWN	UNKNOWN	LIMESTONE		5.49	0.04	1.09		0.77				0.23	21.21	28.29		0.01	0.2	0.01
C224196		USGS		Geochemistry of rock samples from the National Geochemical Database: U.S. Geological Survey, Reston, VA.	U.S. Geological Survey	USGS		33.2037	-111.057	0.01				ICPAES	SEDIMENTARY	UNKNOWN	UNKNOWN	LIMESTONE																									0.27	359		1			6.4
C224196		USGS		Geochemistry of rock samples from the National Geochemical Database: U.S. Geological Survey, Reston, VA.	U.S. Geological Survey	USGS		33.2037	-111.057	0.01				ISE	SEDIMENTARY	UNKNOWN	UNKNOWN	LIMESTONE
C224196		USGS		Geochemistry of rock samples from the National Geochemical Database: U.S. Geological Survey, Reston, VA.	U.S. Geological Survey	USGS		33.2037	-111.057	0.01				MISC	SEDIMENTARY	UNKNOWN	UNKNOWN	LIMESTONE																		27.7
C224196		USGS		Geochemistry of rock samples from the National Geochemical Database: U.S. Geological Survey, Reston, VA.	U.S. Geological Survey	USGS		33.2037	-111.057	0.01				MS	SEDIMENTARY	UNKNOWN	UNKNOWN	LIMESTONE																								16	0.268	321			1.6	0.02	4
C224196		USGS		Geochemistry of rock samples from the National Geochemical Database: U.S. Geological Survey, Reston, VA.	U.S. Geological Survey	USGS		33.2037	-111.057	0.01				TITR	SEDIMENTARY	UNKNOWN	UNKNOWN	LIMESTONE								0.32
C224196		USGS		Geochemistry of rock samples from the National Geochemical Database: U.S. Geological Survey, Reston, VA.	U.S. Geological Survey	USGS		33.2037	-111.057	0.01				XRF	SEDIMENTARY	UNKNOWN	UNKNOWN	LIMESTONE		39.71	0.02	0.14		0.36				0.04	13.4	18.8			0.13
C224199		USGS		Geochemistry of rock samples from the National Geochemical Database: U.S. Geological Survey, Reston, VA.	U.S. Geological Survey	USGS		33.2383	-111.087	0.01				ICPAES	SEDIMENTARY	UNKNOWN	UNKNOWN	LIMESTONE																									0.19	163	4.8				30
C224199		USGS		Geochemistry of rock samples from the National Geochemical Database: U.S. Geological Survey, Reston, VA.	U.S. Geological Survey	USGS		33.2383	-111.087	0.01				ISE	SEDIMENTARY	UNKNOWN	UNKNOWN	LIMESTONE
C224199		USGS		Geochemistry of rock samples from the National Geochemical Database: U.S. Geological Survey, Reston, VA.	U.S. Geological Survey	USGS		33.2383	-111.087	0.01				MISC	SEDIMENTARY	UNKNOWN	UNKNOWN	LIMESTONE																		39.3
C224199		USGS		Geochemistry of rock samples from the National Geochemical Database: U.S. Geological Survey, Reston, VA.	U.S. Geological Survey	USGS		33.2383	-111.087	0.01				MS	SEDIMENTARY	UNKNOWN	UNKNOWN	LIMESTONE																								4	0.199	155	0.26		1.2	0.34	23
C224199		USGS		Geochemistry of rock samples from the National Geochemical Database: U.S. Geological Survey, Reston, VA.	U.S. Geological Survey	USGS		33.2383	-111.087	0.01				TITR	SEDIMENTARY	UNKNOWN	UNKNOWN	LIMESTONE								0.1
C224199		USGS		Geochemistry of rock samples from the National Geochemical Database: U.S. Geological Survey, Reston, VA.	U.S. Geological Survey	USGS		33.2383	-111.087	0.01				XRF	SEDIMENTARY	UNKNOWN	UNKNOWN	LIMESTONE		9.13	0.05	0.62		0.32				0.02	1.39	48.44		0.03	0.07	0.02
CAE007		USGS		Geochemistry of rock samples from the National Geochemical Database: U.S. Geological Survey, Reston, VA.	U.S. Geological Survey	USGS		64.9667	-141.967	0.01				ES	SEDIMENTARY	UNKNOWN	UNKNOWN	LIMESTONE																									1	200	20		20		200
CAK003		USGS		Geochemistry of rock samples from the National Geochemical Database: U.S. Geological Survey, Reston, VA.	U.S. Geological Survey	USGS		61.9119	-141.548	0.01	59	59	59	ES	SEDIMENTARY	UNKNOWN	UNKNOWN	LIMESTONE																									0.2	100
CAK004		USGS		Geochemistry of rock samples from the National Geochemical Database: U.S. Geological Survey, Reston, VA.	U.S. Geological Survey	USGS		61.9208	-141.543	0.01	59	59	59	ES	SEDIMENTARY	UNKNOWN	UNKNOWN	LIMESTONE																									0.2	100
CAK007		USGS		Geochemistry of rock samples from the National Geochemical Database: U.S. Geological Survey, Reston, VA.	U.S. Geological Survey	USGS		61.9122	-141.519	0.01	59	59	59	ES	SEDIMENTARY	UNKNOWN	UNKNOWN	LIMESTONE																									0.2	50			5
CAK046		USGS		Geochemistry of rock samples from the National Geochemical Database: U.S. Geological Survey, Reston, VA.	U.S. Geological Survey	USGS		61.0242	-141.901	0.01				ES	SEDIMENTARY	UNKNOWN	UNKNOWN	LIMESTONE																									5	500	15	7	100
CAM583		USGS		Geochemistry of rock samples from the National Geochemical Database: U.S. Geological Survey, Reston, VA.	U.S. Geological Survey	USGS		65.6283	-147.329	0.01	73	73	73	ES	SEDIMENTARY	UNKNOWN	UNKNOWN	LIMESTONE																									0.5	150	10
CAM620		USGS		Geochemistry of rock samples from the National Geochemical Database: U.S. Geological Survey, Reston, VA.	U.S. Geological Survey	USGS		63.465	-145.897	0.01				ES	SEDIMENTARY	UNKNOWN	UNKNOWN	LIMESTONE																									7			10
CAM623		USGS		Geochemistry of rock samples from the National Geochemical Database: U.S. Geological Survey, Reston, VA.	U.S. Geological Survey	USGS		63.4417	-145.942	0.01				ES	SEDIMENTARY	UNKNOWN	UNKNOWN	LIMESTONE																									2	2000	10		15
CAX661		USGS		Geochemistry of rock samples from the National Geochemical Database: U.S. Geological Survey, Reston, VA.	U.S. Geological Survey	USGS		61.5139	-142.833	0.01				AAS	SEDIMENTARY	UNKNOWN	UNKNOWN	LIMESTONE																															5
CAX661		USGS		Geochemistry of rock samples from the National Geochemical Database: U.S. Geological Survey, Reston, VA.	U.S. Geological Survey	USGS		61.5139	-142.833	0.01				COL	SEDIMENTARY	UNKNOWN	UNKNOWN	LIMESTONE
CAX661		USGS		Geochemistry of rock samples from the National Geochemical Database: U.S. Geological Survey, Reston, VA.	U.S. Geological Survey	USGS		61.5139	-142.833	0.01				ES	SEDIMENTARY	UNKNOWN	UNKNOWN	LIMESTONE																									0.3	200			30
CAX662		USGS		Geochemistry of rock samples from the National Geochemical Database: U.S. Geological Survey, Reston, VA.	U.S. Geological Survey	USGS		61.5139	-142.831	0.01				AAS	SEDIMENTARY	UNKNOWN	UNKNOWN	LIMESTONE																															5
CAX662		USGS		Geochemistry of rock samples from the National Geochemical Database: U.S. Geological Survey, Reston, VA.	U.S. Geological Survey	USGS		61.5139	-142.831	0.01				COL	SEDIMENTARY	UNKNOWN	UNKNOWN	LIMESTONE
CAX662		USGS		Geochemistry of rock samples from the National Geochemical Database: U.S. Geological Survey, Reston, VA.	U.S. Geological Survey	USGS		61.5139	-142.831	0.01				ES	SEDIMENTARY	UNKNOWN	UNKNOWN	LIMESTONE																									0.15	200			5000	50
CAX664		USGS		Geochemistry of rock samples from the National Geochemical Database: U.S. Geological Survey, Reston, VA.	U.S. Geological Survey	USGS		61.5139	-142.831	0.01				AAS	SEDIMENTARY	UNKNOWN	UNKNOWN	LIMESTONE																															10
CAX664		USGS		Geochemistry of rock samples from the National Geochemical Database: U.S. Geological Survey, Reston, VA.	U.S. Geological Survey	USGS		61.5139	-142.831	0.01				COL	SEDIMENTARY	UNKNOWN	UNKNOWN	LIMESTONE
CAX664		USGS		Geochemistry of rock samples from the National Geochemical Database: U.S. Geological Survey, Reston, VA.	U.S. Geological Survey	USGS		61.5139	-142.831	0.01				ES	SEDIMENTARY	UNKNOWN	UNKNOWN	LIMESTONE																									0.1	70				70
CAX670		USGS		Geochemistry of rock samples from the National Geochemical Database: U.S. Geological Survey, Reston, VA.	U.S. Geological Survey	USGS		61.5111	-142.825	0.01				AAS	SEDIMENTARY	UNKNOWN	UNKNOWN	LIMESTONE																															5
CAX670		USGS		Geochemistry of rock samples from the National Geochemical Database: U.S. Geological Survey, Reston, VA.	U.S. Geological Survey	USGS		61.5111	-142.825	0.01				COL	SEDIMENTARY	UNKNOWN	UNKNOWN	LIMESTONE
CAX670		USGS		Geochemistry of rock samples from the National Geochemical Database: U.S. Geological Survey, Reston, VA.	U.S. Geological Survey	USGS		61.5111	-142.825	0.01				ES	SEDIMENTARY	UNKNOWN	UNKNOWN	LIMESTONE																									1	150	5		30
CAX685		USGS		Geochemistry of rock samples from the National Geochemical Database: U.S. Geological Survey, Reston, VA.	U.S. Geological Survey	USGS		61.525	-142.85	0.01				AAS	SEDIMENTARY	UNKNOWN	UNKNOWN	LIMESTONE																															10
CAX685		USGS		Geochemistry of rock samples from the National Geochemical Database: U.S. Geological Survey, Reston, VA.	U.S. Geological Survey	USGS		61.525	-142.85	0.01				COL	SEDIMENTARY	UNKNOWN	UNKNOWN	LIMESTONE
CAX685		USGS		Geochemistry of rock samples from the National Geochemical Database: U.S. Geological Survey, Reston, VA.	U.S. Geological Survey	USGS		61.525	-142.85	0.01				ES	SEDIMENTARY	UNKNOWN	UNKNOWN	LIMESTONE																									0.2	300			10000	50
CAX687		USGS		Geochemistry of rock samples from the National Geochemical Database: U.S. Geological Survey, Reston, VA.	U.S. Geological Survey	USGS		61.5222	-142.814	0.01				AAS	SEDIMENTARY	UNKNOWN	UNKNOWN	LIMESTONE																															5
CAX687		USGS		Geochemistry of rock samples from the National Geochemical Database: U.S. Geological Survey, Reston, VA.	U.S. Geological Survey	USGS		61.5222	-142.814	0.01				ES	SEDIMENTARY	UNKNOWN	UNKNOWN	LIMESTONE																									0.05	30			100
CAX689		USGS		Geochemistry of rock samples from the National Geochemical Database: U.S. Geological Survey, Reston, VA.	U.S. Geological Survey	USGS		61.5417	-142.889	0.01				AAS	SEDIMENTARY	UNKNOWN	UNKNOWN	LIMESTONE																															90
CAX689		USGS		Geochemistry of rock samples from the National Geochemical Database: U.S. Geological Survey, Reston, VA.	U.S. Geological Survey	USGS		61.5417	-142.889	0.01				COL	SEDIMENTARY	UNKNOWN	UNKNOWN	LIMESTONE
CAX689		USGS		Geochemistry of rock samples from the National Geochemical Database: U.S. Geological Survey, Reston, VA.	U.S. Geological Survey	USGS		61.5417	-142.889	0.01				ES	SEDIMENTARY	UNKNOWN	UNKNOWN	LIMESTONE																									7	500	30	10	50
CAX701		USGS		Geochemistry of rock samples from the National Geochemical Database: U.S. Geological Survey, Reston, VA.	U.S. Geological Survey	USGS		61.5139	-142.833	0.01				AAS	SEDIMENTARY	UNKNOWN	UNKNOWN	LIMESTONE																															20
CAX701		USGS		Geochemistry of rock samples from the National Geochemical Database: U.S. Geological Survey, Reston, VA.	U.S. Geological Survey	USGS		61.5139	-142.833	0.01				COL	SEDIMENTARY	UNKNOWN	UNKNOWN	LIMESTONE
CAX701		USGS		Geochemistry of rock samples from the National Geochemical Database: U.S. Geological Survey, Reston, VA.	U.S. Geological Survey	USGS		61.5139	-142.833	0.01				ES	SEDIMENTARY	UNKNOWN	UNKNOWN	LIMESTONE																									1	200			3000
CBI006		USGS		Geochemistry of rock samples from the National Geochemical Database: U.S. Geological Survey, Reston, VA.	U.S. Geological Survey	USGS		68.3097	-147.586	0.01				ES	SEDIMENTARY	UNKNOWN	UNKNOWN	LIMESTONE																									1	1500	10		300
CBJ794		USGS		Geochemistry of rock samples from the National Geochemical Database: U.S. Geological Survey, Reston, VA.	U.S. Geological Survey	USGS		62.7639	-151.8	0.01				ES	SEDIMENTARY	UNKNOWN	UNKNOWN	LIMESTONE																									5	1500	5000	70	50
CBJ810		USGS		Geochemistry of rock samples from the National Geochemical Database: U.S. Geological Survey, Reston, VA.	U.S. Geological Survey	USGS		62.705	-151.806	0.01				ES	SEDIMENTARY	UNKNOWN	UNKNOWN	LIMESTONE																									10	3000	5000	150	100
CBJ826		USGS		Geochemistry of rock samples from the National Geochemical Database: U.S. Geological Survey, Reston, VA.	U.S. Geological Survey	USGS		62.5367	-152.408	0.01				ES	SEDIMENTARY	UNKNOWN	UNKNOWN	LIMESTONE																									15		50	30	10		500
CBJ917		USGS		Geochemistry of rock samples from the National Geochemical Database: U.S. Geological Survey, Reston, VA.	U.S. Geological Survey	USGS		64.8603	-144.853	0.01				ES	SEDIMENTARY	UNKNOWN	UNKNOWN	LIMESTONE																											100	15
CCA515		USGS		Geochemistry of rock samples from the National Geochemical Database: U.S. Geological Survey, Reston, VA.	U.S. Geological Survey	USGS		68.05	-147.792	0.01	55	55	55	AAS	SEDIMENTARY	UNKNOWN	UNKNOWN	LIMESTONE																															170
CCA515		USGS		Geochemistry of rock samples from the National Geochemical Database: U.S. Geological Survey, Reston, VA.	U.S. Geological Survey	USGS		68.05	-147.792	0.01	55	55	55	ES	SEDIMENTARY	UNKNOWN	UNKNOWN	LIMESTONE																											50	50	30		200
CCA518		USGS		Geochemistry of rock samples from the National Geochemical Database: U.S. Geological Survey, Reston, VA.	U.S. Geological Survey	USGS		68.0194	-147.828	0.01	55	55	55	AAS	SEDIMENTARY	UNKNOWN	UNKNOWN	LIMESTONE																															20
CCA518		USGS		Geochemistry of rock samples from the National Geochemical Database: U.S. Geological Survey, Reston, VA.	U.S. Geological Survey	USGS		68.0194	-147.828	0.01	55	55	55	ES	SEDIMENTARY	UNKNOWN	UNKNOWN	LIMESTONE																									0.5	150	50	5	30
CCS225		USGS		Geochemistry of rock samples from the National Geochemical Database: U.S. Geological Survey, Reston, VA.	U.S. Geological Survey	USGS		63.2375	-154.769	0.01				AAS	SEDIMENTARY	UNKNOWN	UNKNOWN	LIMESTONE																													240		10
CCS225		USGS		Geochemistry of rock samples from the National Geochemical Database: U.S. Geological Survey, Reston, VA.	U.S. Geological Survey	USGS		63.2375	-154.769	0.01				ES	SEDIMENTARY	UNKNOWN	UNKNOWN	LIMESTONE																									1.5	200			200
CCS226		USGS		Geochemistry of rock samples from the National Geochemical Database: U.S. Geological Survey, Reston, VA.	U.S. Geological Survey	USGS		63.2375	-154.769	0.01				AAS	SEDIMENTARY	UNKNOWN	UNKNOWN	LIMESTONE																													10		10
CCS226		USGS		Geochemistry of rock samples from the National Geochemical Database: U.S. Geological Survey, Reston, VA.	U.S. Geological Survey	USGS		63.2375	-154.769	0.01				COL	SEDIMENTARY	UNKNOWN	UNKNOWN	LIMESTONE
CCS226		USGS		Geochemistry of rock samples from the National Geochemical Database: U.S. Geological Survey, Reston, VA.	U.S. Geological Survey	USGS		63.2375	-154.769	0.01				ES	SEDIMENTARY	UNKNOWN	UNKNOWN	LIMESTONE																									2	150	10		15
CCS228		USGS		Geochemistry of rock samples from the National Geochemical Database: U.S. Geological Survey, Reston, VA.	U.S. Geological Survey	USGS		63.2403	-154.768	0.01				AAS	SEDIMENTARY	UNKNOWN	UNKNOWN	LIMESTONE																													10		10
CCS228		USGS		Geochemistry of rock samples from the National Geochemical Database: U.S. Geological Survey, Reston, VA.	U.S. Geological Survey	USGS		63.2403	-154.768	0.01				COL	SEDIMENTARY	UNKNOWN	UNKNOWN	LIMESTONE
CCS228		USGS		Geochemistry of rock samples from the National Geochemical Database: U.S. Geological Survey, Reston, VA.	U.S. Geological Survey	USGS		63.2403	-154.768	0.01				ES	SEDIMENTARY	UNKNOWN	UNKNOWN	LIMESTONE																									0.5	300			20
CCS238		USGS		Geochemistry of rock samples from the National Geochemical Database: U.S. Geological Survey, Reston, VA.	U.S. Geological Survey	USGS		63.2417	-154.767	0.01				AAS	SEDIMENTARY	UNKNOWN	UNKNOWN	LIMESTONE																													10		30
CCS238		USGS		Geochemistry of rock samples from the National Geochemical Database: U.S. Geological Survey, Reston, VA.	U.S. Geological Survey	USGS		63.2417	-154.767	0.01				COL	SEDIMENTARY	UNKNOWN	UNKNOWN	LIMESTONE
CCS238		USGS		Geochemistry of rock samples from the National Geochemical Database: U.S. Geological Survey, Reston, VA.	U.S. Geological Survey	USGS		63.2417	-154.767	0.01				ES	SEDIMENTARY	UNKNOWN	UNKNOWN	LIMESTONE																									5	700	30		100
CCS506		USGS		Geochemistry of rock samples from the National Geochemical Database: U.S. Geological Survey, Reston, VA.	U.S. Geological Survey	USGS		63.1167	-155.064	0.01	65	65	65	AAS	SEDIMENTARY	UNKNOWN	UNKNOWN	LIMESTONE																													5		5
CCS506		USGS		Geochemistry of rock samples from the National Geochemical Database: U.S. Geological Survey, Reston, VA.	U.S. Geological Survey	USGS		63.1167	-155.064	0.01	65	65	65	ES	SEDIMENTARY	UNKNOWN	UNKNOWN	LIMESTONE																										200
CDA660		USGS		Geochemistry of rock samples from the National Geochemical Database: U.S. Geological Survey, Reston, VA.	U.S. Geological Survey	USGS		56.3083	-133.548	0.01				AAS	SEDIMENTARY	UNKNOWN	UNKNOWN	LIMESTONE																													10		25
CDA660		USGS		Geochemistry of rock samples from the National Geochemical Database: U.S. Geological Survey, Reston, VA.	U.S. Geological Survey	USGS		56.3083	-133.548	0.01				ES	SEDIMENTARY	UNKNOWN	UNKNOWN	LIMESTONE																									0.05	70
CDN438		USGS		Geochemistry of rock samples from the National Geochemical Database: U.S. Geological Survey, Reston, VA.	U.S. Geological Survey	USGS		56.6072	-131.572	0.01				AAS	SEDIMENTARY	UNKNOWN	UNKNOWN	LIMESTONE																													5		15
CDN438		USGS		Geochemistry of rock samples from the National Geochemical Database: U.S. Geological Survey, Reston, VA.	U.S. Geological Survey	USGS		56.6072	-131.572	0.01				ES	SEDIMENTARY	UNKNOWN	UNKNOWN	LIMESTONE																									0.1	50	7
CDP608		USGS		Geochemistry of rock samples from the National Geochemical Database: U.S. Geological Survey, Reston, VA.	U.S. Geological Survey	USGS		62.7753	-146.681	0.01				AAS	SEDIMENTARY	UNKNOWN	UNKNOWN	LIMESTONE																														0.3	10
CDP608		USGS		Geochemistry of rock samples from the National Geochemical Database: U.S. Geological Survey, Reston, VA.	U.S. Geological Survey	USGS		62.7753	-146.681	0.01				ES	SEDIMENTARY	UNKNOWN	UNKNOWN	LIMESTONE																									0.5	500
CDP609		USGS		Geochemistry of rock samples from the National Geochemical Database: U.S. Geological Survey, Reston, VA.	U.S. Geological Survey	USGS		62.7792	-146.67	0.01				AAS	SEDIMENTARY	UNKNOWN	UNKNOWN	LIMESTONE																															10
CDP609		USGS		Geochemistry of rock samples from the National Geochemical Database: U.S. Geological Survey, Reston, VA.	U.S. Geological Survey	USGS		62.7792	-146.67	0.01				ES	SEDIMENTARY	UNKNOWN	UNKNOWN	LIMESTONE																										50
CDS410		USGS		Geochemistry of rock samples from the National Geochemical Database: U.S. Geological Survey, Reston, VA.	U.S. Geological Survey	USGS		63.45	-154.133	0.01	55	55	55	AAS	SEDIMENTARY	UNKNOWN	UNKNOWN	LIMESTONE																													10		25
CDS410		USGS		Geochemistry of rock samples from the National Geochemical Database: U.S. Geological Survey, Reston, VA.	U.S. Geological Survey	USGS		63.45	-154.133	0.01	55	55	55	ES	SEDIMENTARY	UNKNOWN	UNKNOWN	LIMESTONE																									1	150	15		7
CDS411		USGS		Geochemistry of rock samples from the National Geochemical Database: U.S. Geological Survey, Reston, VA.	U.S. Geological Survey	USGS		63.45	-154.117	0.01	55	55	55	AAS	SEDIMENTARY	UNKNOWN	UNKNOWN	LIMESTONE																													15		320
CDS411		USGS		Geochemistry of rock samples from the National Geochemical Database: U.S. Geological Survey, Reston, VA.	U.S. Geological Survey	USGS		63.45	-154.117	0.01	55	55	55	ES	SEDIMENTARY	UNKNOWN	UNKNOWN	LIMESTONE																										100	70		30		700
CDS412		USGS		Geochemistry of rock samples from the National Geochemical Database: U.S. Geological Survey, Reston, VA.	U.S. Geological Survey	USGS		63.45	-154.117	0.01	55	55	55	AAS	SEDIMENTARY	UNKNOWN	UNKNOWN	LIMESTONE																													10		25
CDS412		USGS		Geochemistry of rock samples from the National Geochemical Database: U.S. Geological Survey, Reston, VA.	U.S. Geological Survey	USGS		63.45	-154.117	0.01	55	55	55	ES	SEDIMENTARY	UNKNOWN	UNKNOWN	LIMESTONE																									0.5	100	7
CDS413		USGS		Geochemistry of rock samples from the National Geochemical Database: U.S. Geological Survey, Reston, VA.	U.S. Geological Survey	USGS		63.45	-154.117	0.01	55	55	55	AAS	SEDIMENTARY	UNKNOWN	UNKNOWN	LIMESTONE																													45		110
CDS413		USGS		Geochemistry of rock samples from the National Geochemical Database: U.S. Geological Survey, Reston, VA.	U.S. Geological Survey	USGS		63.45	-154.117	0.01	55	55	55	ES	SEDIMENTARY	UNKNOWN	UNKNOWN	LIMESTONE																										300	200		150		300
CDS414		USGS		Geochemistry of rock samples from the National Geochemical Database: U.S. Geological Survey, Reston, VA.	U.S. Geological Survey	USGS		63.45	-154.117	0.01	55	55	55	AAS	SEDIMENTARY	UNKNOWN	UNKNOWN	LIMESTONE																													20		50
CDS414		USGS		Geochemistry of rock samples from the National Geochemical Database: U.S. Geological Survey, Reston, VA.	U.S. Geological Survey	USGS		63.45	-154.117	0.01	55	55	55	ES	SEDIMENTARY	UNKNOWN	UNKNOWN	LIMESTONE																									15	70	50		30
CDS415		USGS		Geochemistry of rock samples from the National Geochemical Database: U.S. Geological Survey, Reston, VA.	U.S. Geological Survey	USGS		63.9167	-153.667	0.01				AAS	SEDIMENTARY	UNKNOWN	UNKNOWN	LIMESTONE																													5		15
CDS415		USGS		Geochemistry of rock samples from the National Geochemical Database: U.S. Geological Survey, Reston, VA.	U.S. Geological Survey	USGS		63.9167	-153.667	0.01				ES	SEDIMENTARY	UNKNOWN	UNKNOWN	LIMESTONE																									0.3	50			5
CDS429		USGS		Geochemistry of rock samples from the National Geochemical Database: U.S. Geological Survey, Reston, VA.	U.S. Geological Survey	USGS		63.7167	-153.983	0.01				AAS	SEDIMENTARY	UNKNOWN	UNKNOWN	LIMESTONE																													10		15
CDS429		USGS		Geochemistry of rock samples from the National Geochemical Database: U.S. Geological Survey, Reston, VA.	U.S. Geological Survey	USGS		63.7167	-153.983	0.01				COL	SEDIMENTARY	UNKNOWN	UNKNOWN	LIMESTONE
CDS429		USGS		Geochemistry of rock samples from the National Geochemical Database: U.S. Geological Survey, Reston, VA.	U.S. Geological Survey	USGS		63.7167	-153.983	0.01				ES	SEDIMENTARY	UNKNOWN	UNKNOWN	LIMESTONE																									0.3	20	5		5
CEC878		USGS		Geochemistry of rock samples from the National Geochemical Database: U.S. Geological Survey, Reston, VA.	U.S. Geological Survey	USGS		61.6589	-144.113	0.01				AAS	SEDIMENTARY	UNKNOWN	UNKNOWN	LIMESTONE																													5		10
CEC878		USGS		Geochemistry of rock samples from the National Geochemical Database: U.S. Geological Survey, Reston, VA.	U.S. Geological Survey	USGS		61.6589	-144.113	0.01				COL	SEDIMENTARY	UNKNOWN	UNKNOWN	LIMESTONE
CEC878		USGS		Geochemistry of rock samples from the National Geochemical Database: U.S. Geological Survey, Reston, VA.	U.S. Geological Survey	USGS		61.6589	-144.113	0.01				ES	SEDIMENTARY	UNKNOWN	UNKNOWN	LIMESTONE																									0.15	200
CEC904		USGS		Geochemistry of rock samples from the National Geochemical Database: U.S. Geological Survey, Reston, VA.	U.S. Geological Survey	USGS		61.6764	-144.065	0.01				AAS	SEDIMENTARY	UNKNOWN	UNKNOWN	LIMESTONE																													2700		10
CEC904		USGS		Geochemistry of rock samples from the National Geochemical Database: U.S. Geological Survey, Reston, VA.	U.S. Geological Survey	USGS		61.6764	-144.065	0.01				COL	SEDIMENTARY	UNKNOWN	UNKNOWN	LIMESTONE
CEC904		USGS		Geochemistry of rock samples from the National Geochemical Database: U.S. Geological Survey, Reston, VA.	U.S. Geological Survey	USGS		61.6764	-144.065	0.01				ES	SEDIMENTARY	UNKNOWN	UNKNOWN	LIMESTONE																									0.15	700			1500
CEC905		USGS		Geochemistry of rock samples from the National Geochemical Database: U.S. Geological Survey, Reston, VA.	U.S. Geological Survey	USGS		61.6764	-144.065	0.01				AAS	SEDIMENTARY	UNKNOWN	UNKNOWN	LIMESTONE																													18000		15
CEC905		USGS		Geochemistry of rock samples from the National Geochemical Database: U.S. Geological Survey, Reston, VA.	U.S. Geological Survey	USGS		61.6764	-144.065	0.01				COL	SEDIMENTARY	UNKNOWN	UNKNOWN	LIMESTONE
CEC905		USGS		Geochemistry of rock samples from the National Geochemical Database: U.S. Geological Survey, Reston, VA.	U.S. Geological Survey	USGS		61.6764	-144.065	0.01				ES	SEDIMENTARY	UNKNOWN	UNKNOWN	LIMESTONE																									0.5	500			15000	70
CEC911		USGS		Geochemistry of rock samples from the National Geochemical Database: U.S. Geological Survey, Reston, VA.	U.S. Geological Survey	USGS		61.6764	-144.065	0.01				AAS	SEDIMENTARY	UNKNOWN	UNKNOWN	LIMESTONE																													50		45
CEC911		USGS		Geochemistry of rock samples from the National Geochemical Database: U.S. Geological Survey, Reston, VA.	U.S. Geological Survey	USGS		61.6764	-144.065	0.01				COL	SEDIMENTARY	UNKNOWN	UNKNOWN	LIMESTONE
CEC911		USGS		Geochemistry of rock samples from the National Geochemical Database: U.S. Geological Survey, Reston, VA.	U.S. Geological Survey	USGS		61.6764	-144.065	0.01				ES	SEDIMENTARY	UNKNOWN	UNKNOWN	LIMESTONE																									10	150	10	15		300
CEE956		USGS		Geochemistry of rock samples from the National Geochemical Database: U.S. Geological Survey, Reston, VA.	U.S. Geological Survey	USGS		61.6692	-144.067	0.01				AAS	SEDIMENTARY	UNKNOWN	UNKNOWN	LIMESTONE																													10		10
CEE956		USGS		Geochemistry of rock samples from the National Geochemical Database: U.S. Geological Survey, Reston, VA.	U.S. Geological Survey	USGS		61.6692	-144.067	0.01				ES	SEDIMENTARY	UNKNOWN	UNKNOWN	LIMESTONE																									0.7	700			5
CEJ766		USGS		Geochemistry of rock samples from the National Geochemical Database: U.S. Geological Survey, Reston, VA.	U.S. Geological Survey	USGS		65.8417	-145.921	0.01				ES	SEDIMENTARY	UNKNOWN	UNKNOWN	LIMESTONE																									1	300	7	5	10
CEJ779		USGS		Geochemistry of rock samples from the National Geochemical Database: U.S. Geological Survey, Reston, VA.	U.S. Geological Survey	USGS		65.8486	-145.993	0.01				ES	SEDIMENTARY	UNKNOWN	UNKNOWN	LIMESTONE																									1.5	150	20	7	30
CEJ791		USGS		Geochemistry of rock samples from the National Geochemical Database: U.S. Geological Survey, Reston, VA.	U.S. Geological Survey	USGS		65.9164	-146.939	0.01				ES	SEDIMENTARY	UNKNOWN	UNKNOWN	LIMESTONE																									3	700	100	30	20		200
CEJ821		USGS		Geochemistry of rock samples from the National Geochemical Database: U.S. Geological Survey, Reston, VA.	U.S. Geological Survey	USGS		65.8856	-146.971	0.01				ES	SEDIMENTARY	UNKNOWN	UNKNOWN	LIMESTONE																									0.7	150	10		5
CEP525		USGS		Geochemistry of rock samples from the National Geochemical Database: U.S. Geological Survey, Reston, VA.	U.S. Geological Survey	USGS		56.2808	-132.702	0.01	59	59	59	AAS	SEDIMENTARY	UNKNOWN	UNKNOWN	LIMESTONE																															400
CEP525		USGS		Geochemistry of rock samples from the National Geochemical Database: U.S. Geological Survey, Reston, VA.	U.S. Geological Survey	USGS		56.2808	-132.702	0.01	59	59	59	ES	SEDIMENTARY	UNKNOWN	UNKNOWN	LIMESTONE																									2	700	30		7		1500
CEY122		USGS		Geochemistry of rock samples from the National Geochemical Database: U.S. Geological Survey, Reston, VA.	U.S. Geological Survey	USGS		65.7789	-146.04	0.01				ES	SEDIMENTARY	UNKNOWN	UNKNOWN	LIMESTONE																									0.5	700	5
CEY131		USGS		Geochemistry of rock samples from the National Geochemical Database: U.S. Geological Survey, Reston, VA.	U.S. Geological Survey	USGS		65.8425	-145.993	0.01				ES	SEDIMENTARY	UNKNOWN	UNKNOWN	LIMESTONE																									2	200	10	10	10
CEY138		USGS		Geochemistry of rock samples from the National Geochemical Database: U.S. Geological Survey, Reston, VA.	U.S. Geological Survey	USGS		65.855	-145.778	0.01				ES	SEDIMENTARY	UNKNOWN	UNKNOWN	LIMESTONE																									5	700	30	20	5
CEY160		USGS		Geochemistry of rock samples from the National Geochemical Database: U.S. Geological Survey, Reston, VA.	U.S. Geological Survey	USGS		65.7656	-145.894	0.01				ES	SEDIMENTARY	UNKNOWN	UNKNOWN	LIMESTONE																									0.5	200	5		5
CEY163		USGS		Geochemistry of rock samples from the National Geochemical Database: U.S. Geological Survey, Reston, VA.	U.S. Geological Survey	USGS		65.2545	-144.483	0.01				ES	SEDIMENTARY	UNKNOWN	UNKNOWN	LIMESTONE																									5	1000	50	15	5
CEY164		USGS		Geochemistry of rock samples from the National Geochemical Database: U.S. Geological Survey, Reston, VA.	U.S. Geological Survey	USGS		65.2555	-144.472	0.01				ES	SEDIMENTARY	UNKNOWN	UNKNOWN	LIMESTONE																									5	1000	50	15	10
CEY200		USGS		Geochemistry of rock samples from the National Geochemical Database: U.S. Geological Survey, Reston, VA.	U.S. Geological Survey	USGS		65.7678	-145.608	0.01				ES	SEDIMENTARY	UNKNOWN	UNKNOWN	LIMESTONE																									0.7	1500	7	5	30
CEY202		USGS		Geochemistry of rock samples from the National Geochemical Database: U.S. Geological Survey, Reston, VA.	U.S. Geological Survey	USGS		65.6864	-145.678	0.01				ES	SEDIMENTARY	UNKNOWN	UNKNOWN	LIMESTONE																									0.7	200	5
CEY203		USGS		Geochemistry of rock samples from the National Geochemical Database: U.S. Geological Survey, Reston, VA.	U.S. Geological Survey	USGS		65.6864	-145.678	0.01				ES	SEDIMENTARY	UNKNOWN	UNKNOWN	LIMESTONE																									1	500	7		5		500
CEY963		USGS		Geochemistry of rock samples from the National Geochemical Database: U.S. Geological Survey, Reston, VA.	U.S. Geological Survey	USGS		65.743	-144.387	0.01				ES	SEDIMENTARY	UNKNOWN	UNKNOWN	LIMESTONE																									1.5		30	7	10
CEY965		USGS		Geochemistry of rock samples from the National Geochemical Database: U.S. Geological Survey, Reston, VA.	U.S. Geological Survey	USGS		65.743	-144.387	0.01				ES	SEDIMENTARY	UNKNOWN	UNKNOWN	LIMESTONE																									3	1000	100	20	50
CFH519		USGS		Geochemistry of rock samples from the National Geochemical Database: U.S. Geological Survey, Reston, VA.	U.S. Geological Survey	USGS		65.6422	-146.786	0.01				ES	SEDIMENTARY	UNKNOWN	UNKNOWN	LIMESTONE																									0.2	100
CFH519		USGS		Geochemistry of rock samples from the National Geochemical Database: U.S. Geological Survey, Reston, VA.	U.S. Geological Survey	USGS		65.6422	-146.786	0.01				FLUOR	SEDIMENTARY	UNKNOWN	UNKNOWN	LIMESTONE
CFH520		USGS		Geochemistry of rock samples from the National Geochemical Database: U.S. Geological Survey, Reston, VA.	U.S. Geological Survey	USGS		65.6422	-146.786	0.01				ES	SEDIMENTARY	UNKNOWN	UNKNOWN	LIMESTONE																									3	2000	70	20
CFR305		USGS		Geochemistry of rock samples from the National Geochemical Database: U.S. Geological Survey, Reston, VA.	U.S. Geological Survey	USGS		59.8167	-144.583	0.01				AAS	SEDIMENTARY	UNKNOWN	UNKNOWN	LIMESTONE																															40
CFR305		USGS		Geochemistry of rock samples from the National Geochemical Database: U.S. Geological Survey, Reston, VA.	U.S. Geological Survey	USGS		59.8167	-144.583	0.01				ES	SEDIMENTARY	UNKNOWN	UNKNOWN	LIMESTONE																									1	2000	5		10
CFR306		USGS		Geochemistry of rock samples from the National Geochemical Database: U.S. Geological Survey, Reston, VA.	U.S. Geological Survey	USGS		59.8167	-144.583	0.01				AAS	SEDIMENTARY	UNKNOWN	UNKNOWN	LIMESTONE																															50
CFR306		USGS		Geochemistry of rock samples from the National Geochemical Database: U.S. Geological Survey, Reston, VA.	U.S. Geological Survey	USGS		59.8167	-144.583	0.01				ES	SEDIMENTARY	UNKNOWN	UNKNOWN	LIMESTONE																									2	1000	20	15	20
CGI119		USGS		Geochemistry of rock samples from the National Geochemical Database: U.S. Geological Survey, Reston, VA.	U.S. Geological Survey	USGS		58.2417	-135.739	0.01				AAS	SEDIMENTARY	UNKNOWN	UNKNOWN	LIMESTONE																														0.1	20
CGI119		USGS		Geochemistry of rock samples from the National Geochemical Database: U.S. Geological Survey, Reston, VA.	U.S. Geological Survey	USGS		58.2417	-135.739	0.01				ES	SEDIMENTARY	UNKNOWN	UNKNOWN	LIMESTONE																									0.7	1000	10		10
CHW252		USGS		Geochemistry of rock samples from the National Geochemical Database: U.S. Geological Survey, Reston, VA.	U.S. Geological Survey	USGS		60.2805	-159.54	0.01				AAS	SEDIMENTARY	UNKNOWN	UNKNOWN	LIMESTONE																														0.2	65
CHW252		USGS		Geochemistry of rock samples from the National Geochemical Database: U.S. Geological Survey, Reston, VA.	U.S. Geological Survey	USGS		60.2805	-159.54	0.01				ES	SEDIMENTARY	UNKNOWN	UNKNOWN	LIMESTONE																									3	1000			30
CHZ128		USGS		Geochemistry of rock samples from the National Geochemical Database: U.S. Geological Survey, Reston, VA.	U.S. Geological Survey	USGS		65.3758	-149.522	0.01				AAS	SEDIMENTARY	UNKNOWN	UNKNOWN	LIMESTONE																														0.7	70
CHZ128		USGS		Geochemistry of rock samples from the National Geochemical Database: U.S. Geological Survey, Reston, VA.	U.S. Geological Survey	USGS		65.3758	-149.522	0.01				ES	SEDIMENTARY	UNKNOWN	UNKNOWN	LIMESTONE																									0.5	10	5		20
CJL488		USGS		Geochemistry of rock samples from the National Geochemical Database: U.S. Geological Survey, Reston, VA.	U.S. Geological Survey	USGS		55.1589	-131.569	0.01				AAS	SEDIMENTARY	UNKNOWN	UNKNOWN	LIMESTONE																														1.4	195
CJL488		USGS		Geochemistry of rock samples from the National Geochemical Database: U.S. Geological Survey, Reston, VA.	U.S. Geological Survey	USGS		55.1589	-131.569	0.01				ES	SEDIMENTARY	UNKNOWN	UNKNOWN	LIMESTONE																									2	70	50	10	70
D101861		USGS		Geochemistry of rock samples from the National Geochemical Database: U.S. Geological Survey, Reston, VA.	U.S. Geological Survey	USGS		39.9667	-112.067	0.01	67	67	67	UNKNOWN	SEDIMENTARY	UNKNOWN	UNKNOWN	LIMESTONE		2.46	0.03	0.53		0.33		0.02		0.2	0.66	52.86		0.03	0.15	0.02								0.7	0.3	700
D101912		USGS		Geochemistry of rock samples from the National Geochemical Database: U.S. Geological Survey, Reston, VA.	U.S. Geological Survey	USGS		38.8667	-114.25	0.01				UNKNOWN	SEDIMENTARY	UNKNOWN	UNKNOWN	LIMESTONE		66.34	0.08	0.81		0.39		3.33		0.51	8.29	15.59		0.11	0.06	0.51									3	7000	3		7
D101913		USGS		Geochemistry of rock samples from the National Geochemical Database: U.S. Geological Survey, Reston, VA.	U.S. Geological Survey	USGS		38.8667	-114.25	0.01				UNKNOWN	SEDIMENTARY	UNKNOWN	UNKNOWN	LIMESTONE		20.94	0.03	0.47		1.13		2.52		0.82	12.87	24.86		0.03	0.1	0.27								7	3	3000	3		2
D101914		USGS		Geochemistry of rock samples from the National Geochemical Database: U.S. Geological Survey, Reston, VA.	U.S. Geological Survey	USGS		38.8667	-114.25	0.01				UNKNOWN	SEDIMENTARY	UNKNOWN	UNKNOWN	LIMESTONE		30.04	0.04	0.4		0.77		4.41		0.87	10.18	21.45		0.03	0.08	0.24								10	5	5000	3		3
D101915		USGS		Geochemistry of rock samples from the National Geochemical Database: U.S. Geological Survey, Reston, VA.	U.S. Geological Survey	USGS		38.8667	-114.25	0.01				UNKNOWN	SEDIMENTARY	UNKNOWN	UNKNOWN	LIMESTONE		34.13	0.05	0.5		1.03		3.31		0.83	10	20.09		0.05	0.1	0.48									5	5000	5		2
D101916		USGS		Geochemistry of rock samples from the National Geochemical Database: U.S. Geological Survey, Reston, VA.	U.S. Geological Survey	USGS		38.8667	-114.25	0.01				UNKNOWN	SEDIMENTARY	UNKNOWN	UNKNOWN	LIMESTONE		7.32	0.01	0.23		2		3.29		1.71	14.33	28.84		0.04	0.03	0.13								1.5	5	7000	3		1
D101917		USGS		Geochemistry of rock samples from the National Geochemical Database: U.S. Geological Survey, Reston, VA.	U.S. Geological Survey	USGS		38.8667	-114.25	0.01				UNKNOWN	SEDIMENTARY	UNKNOWN	UNKNOWN	LIMESTONE		3.25	0.02	0.48		0.57		5.43		0.9	13.9	31.41		0.05	0.12	0.16								0.7	7	5000	5	7	10
D101918		USGS		Geochemistry of rock samples from the National Geochemical Database: U.S. Geological Survey, Reston, VA.	U.S. Geological Survey	USGS		38.8667	-114.133	0.01				UNKNOWN	SEDIMENTARY	UNKNOWN	UNKNOWN	LIMESTONE		7.64	0.09	2.12		0.64		0.23		0.04	1.19	47.96		0.24	0.8	0.05								2	0.7	200	5		15
D101919		USGS		Geochemistry of rock samples from the National Geochemical Database: U.S. Geological Survey, Reston, VA.	U.S. Geological Survey	USGS		38.8667	-114.133	0.01				UNKNOWN	SEDIMENTARY	UNKNOWN	UNKNOWN	LIMESTONE		0.77	0.01	0.15		0.05		0.1		0.03	0.76	54.66		0.03	0.02	0.01								0.15	0.15	150			15
D101920		USGS		Geochemistry of rock samples from the National Geochemical Database: U.S. Geological Survey, Reston, VA.	U.S. Geological Survey	USGS		38.8667	-114.133	0.01				UNKNOWN	SEDIMENTARY	UNKNOWN	UNKNOWN	LIMESTONE		1.89	0.03	0.89		0.11		0.24		0.06	0.99	52.98		0.03	0.25	0.01								0.7	0.5	300			1.5
D101921		USGS		Geochemistry of rock samples from the National Geochemical Database: U.S. Geological Survey, Reston, VA.	U.S. Geological Survey	USGS		38.8667	-114.133	0.01				UNKNOWN	SEDIMENTARY	UNKNOWN	UNKNOWN	LIMESTONE		32.06	0.36	10.6		0.31		2.83		0.04	4.72	27.07		0.89	2.13	0.05									1.5	300	15	5	20
D101922		USGS		Geochemistry of rock samples from the National Geochemical Database: U.S. Geological Survey, Reston, VA.	U.S. Geological Survey	USGS		38.8667	-114.133	0.01				UNKNOWN	SEDIMENTARY	UNKNOWN	UNKNOWN	LIMESTONE		7.14	0.04	1.37		0.1		0.3		0.03	1.2	49.41		0.14	0.48	0.02								1.5	0.5	150			2
D101923		USGS		Geochemistry of rock samples from the National Geochemical Database: U.S. Geological Survey, Reston, VA.	U.S. Geological Survey	USGS		38.8667	-114.133	0.01				UNKNOWN	SEDIMENTARY	UNKNOWN	UNKNOWN	LIMESTONE		0.26	0.01	0.13		0.11		0.04		0.01	1.14	54.37		0.01	0.03	0.01								0.15	0.15	50			3
D101924		USGS		Geochemistry of rock samples from the National Geochemical Database: U.S. Geological Survey, Reston, VA.	U.S. Geological Survey	USGS		38.8667	-114.133	0.01				UNKNOWN	SEDIMENTARY	UNKNOWN	UNKNOWN	LIMESTONE		0.92	0.02	0.18		0.38		0.1		0.07	0.54	54.4		0.03	0.06	0.03								0.3	0.5	500			3
D101925		USGS		Geochemistry of rock samples from the National Geochemical Database: U.S. Geological Survey, Reston, VA.	U.S. Geological Survey	USGS		38.8667	-114.133	0.01				UNKNOWN	SEDIMENTARY	UNKNOWN	UNKNOWN	LIMESTONE		0.15	0.01	0.08		0.06		0.05		0.01	2.78	52.61		0.01	0.02	0.01								0.07	0.07	30			1
D101926		USGS		Geochemistry of rock samples from the National Geochemical Database: U.S. Geological Survey, Reston, VA.	U.S. Geological Survey	USGS		38.8667	-114.133	0.01				UNKNOWN	SEDIMENTARY	UNKNOWN	UNKNOWN	LIMESTONE																								0.2	0.3	70			3
D101927		USGS		Geochemistry of rock samples from the National Geochemical Database: U.S. Geological Survey, Reston, VA.	U.S. Geological Survey	USGS		38.8667	-114.133	0.01				UNKNOWN	SEDIMENTARY	UNKNOWN	UNKNOWN	LIMESTONE																								0.7	0.3	150			5
D102025		USGS		Geochemistry of rock samples from the National Geochemical Database: U.S. Geological Survey, Reston, VA.	U.S. Geological Survey	USGS		38.8667	-114.25	0.01	67	67	67	UNKNOWN	SEDIMENTARY	UNKNOWN	UNKNOWN	LIMESTONE		30.16	0.38	9.39		0.99		2.01		0.05	4.58	31.4		0.99	1.24	0.07								10	1.5	300	10	7	15
D102815		USGS		Geochemistry of rock samples from the National Geochemical Database: U.S. Geological Survey, Reston, VA.	U.S. Geological Survey	USGS		39.64	-112.005	0.01	15	15	15	UNKNOWN	SEDIMENTARY	UNKNOWN	UNKNOWN	LIMESTONE				0.36						0.03	0.65	54.92				0.03								0.05	0.15	100			1.5		300
D102816		USGS		Geochemistry of rock samples from the National Geochemical Database: U.S. Geological Survey, Reston, VA.	U.S. Geological Survey	USGS		39.6319	-112.001	0.01	15	15	15	UNKNOWN	SEDIMENTARY	UNKNOWN	UNKNOWN	LIMESTONE				0.28							0.72	54.53		0.12	0.13	0.02								0.1	0.01	30
D111192		USGS		Geochemistry of rock samples from the National Geochemical Database: U.S. Geological Survey, Reston, VA.	U.S. Geological Survey	USGS		40.1333	-80.25	0.01	71	71	71	UNKNOWN	SEDIMENTARY	UNKNOWN	UNKNOWN	LIMESTONE																									1.5	1000	15		15
D111193		USGS		Geochemistry of rock samples from the National Geochemical Database: U.S. Geological Survey, Reston, VA.	U.S. Geological Survey	USGS		40.1333	-80.25	0.01	71	71	71	UNKNOWN	SEDIMENTARY	UNKNOWN	UNKNOWN	LIMESTONE								0.88																	1	3000	7
D111194		USGS		Geochemistry of rock samples from the National Geochemical Database: U.S. Geological Survey, Reston, VA.	U.S. Geological Survey	USGS		40.1333	-80.25	0.01	71	71	71	UNKNOWN	SEDIMENTARY	UNKNOWN	UNKNOWN	LIMESTONE																									0.7	1000	7		5
D111195		USGS		Geochemistry of rock samples from the National Geochemical Database: U.S. Geological Survey, Reston, VA.	U.S. Geological Survey	USGS		40.1333	-80.25	0.01	71	71	71	UNKNOWN	SEDIMENTARY	UNKNOWN	UNKNOWN	LIMESTONE																									1	700	10		10
D111196		USGS		Geochemistry of rock samples from the National Geochemical Database: U.S. Geological Survey, Reston, VA.	U.S. Geological Survey	USGS		40.1333	-80.25	0.01	71	71	71	UNKNOWN	SEDIMENTARY	UNKNOWN	UNKNOWN	LIMESTONE																									1.5	700	20		10
D111197		USGS		Geochemistry of rock samples from the National Geochemical Database: U.S. Geological Survey, Reston, VA.	U.S. Geological Survey	USGS		40.1333	-80.25	0.01	71	71	71	UNKNOWN	SEDIMENTARY	UNKNOWN	UNKNOWN	LIMESTONE																									1	500	10		10
D111198		USGS		Geochemistry of rock samples from the National Geochemical Database: U.S. Geological Survey, Reston, VA.	U.S. Geological Survey	USGS		40.1333	-80.25	0.01	71	71	71	UNKNOWN	SEDIMENTARY	UNKNOWN	UNKNOWN	LIMESTONE																									1	1000	7		5
D111199		USGS		Geochemistry of rock samples from the National Geochemical Database: U.S. Geological Survey, Reston, VA.	U.S. Geological Survey	USGS		40.1333	-80.25	0.01	71	71	71	UNKNOWN	SEDIMENTARY	UNKNOWN	UNKNOWN	LIMESTONE																									1	1500	7		3
D111200		USGS		Geochemistry of rock samples from the National Geochemical Database: U.S. Geological Survey, Reston, VA.	U.S. Geological Survey	USGS		40.1333	-80.25	0.01	71	71	71	UNKNOWN	SEDIMENTARY	UNKNOWN	UNKNOWN	LIMESTONE																									1	700	7		5
D111201		USGS		Geochemistry of rock samples from the National Geochemical Database: U.S. Geological Survey, Reston, VA.	U.S. Geological Survey	USGS		40.1333	-80.25	0.01	71	71	71	UNKNOWN	SEDIMENTARY	UNKNOWN	UNKNOWN	LIMESTONE																									1	700	10		7
D111202		USGS		Geochemistry of rock samples from the National Geochemical Database: U.S. Geological Survey, Reston, VA.	U.S. Geological Survey	USGS		40.1333	-80.25	0.01	71	71	71	UNKNOWN	SEDIMENTARY	UNKNOWN	UNKNOWN	LIMESTONE																									2	2000			1.5
D111203		USGS		Geochemistry of rock samples from the National Geochemical Database: U.S. Geological Survey, Reston, VA.	U.S. Geological Survey	USGS		40.1333	-80.25	0.01	71	71	71	UNKNOWN	SEDIMENTARY	UNKNOWN	UNKNOWN	LIMESTONE								0.71																	0.7	1500	7		3
D111204		USGS		Geochemistry of rock samples from the National Geochemical Database: U.S. Geological Survey, Reston, VA.	U.S. Geological Survey	USGS		40.1333	-80.25	0.01	71	71	71	MISC	SEDIMENTARY	UNKNOWN	UNKNOWN	LIMESTONE																		28.7
D111204		USGS		Geochemistry of rock samples from the National Geochemical Database: U.S. Geological Survey, Reston, VA.	U.S. Geological Survey	USGS		40.1333	-80.25	0.01	71	71	71	UNKNOWN	SEDIMENTARY	UNKNOWN	UNKNOWN	LIMESTONE		2.1		4.3							0.68	35.4													2	1000	20	10	15
D111205		USGS		Geochemistry of rock samples from the National Geochemical Database: U.S. Geological Survey, Reston, VA.	U.S. Geological Survey	USGS		40.1333	-80.25	0.01	71	71	71	UNKNOWN	SEDIMENTARY	UNKNOWN	UNKNOWN	LIMESTONE																									1	700	10		7
D111206		USGS		Geochemistry of rock samples from the National Geochemical Database: U.S. Geological Survey, Reston, VA.	U.S. Geological Survey	USGS		40.1333	-80.25	0.01	71	71	71	UNKNOWN	SEDIMENTARY	UNKNOWN	UNKNOWN	LIMESTONE																									3	1500	20	15	30
D111207		USGS		Geochemistry of rock samples from the National Geochemical Database: U.S. Geological Survey, Reston, VA.	U.S. Geological Survey	USGS		40.1333	-80.25	0.01	71	71	71	UNKNOWN	SEDIMENTARY	UNKNOWN	UNKNOWN	LIMESTONE																									2	700	20	10	30
D111208		USGS		Geochemistry of rock samples from the National Geochemical Database: U.S. Geological Survey, Reston, VA.	U.S. Geological Survey	USGS		40.1333	-80.25	0.01	71	71	71	UNKNOWN	SEDIMENTARY	UNKNOWN	UNKNOWN	LIMESTONE																									1.5	1000	7		7
D111209		USGS		Geochemistry of rock samples from the National Geochemical Database: U.S. Geological Survey, Reston, VA.	U.S. Geological Survey	USGS		40.1333	-80.25	0.01	71	71	71	UNKNOWN	SEDIMENTARY	UNKNOWN	UNKNOWN	LIMESTONE																									1	1500	7		5
D111210		USGS		Geochemistry of rock samples from the National Geochemical Database: U.S. Geological Survey, Reston, VA.	U.S. Geological Survey	USGS		40.1333	-80.25	0.01	71	71	71	MISC	SEDIMENTARY	UNKNOWN	UNKNOWN	LIMESTONE																		23.2
D111210		USGS		Geochemistry of rock samples from the National Geochemical Database: U.S. Geological Survey, Reston, VA.	U.S. Geological Survey	USGS		40.1333	-80.25	0.01	71	71	71	UNKNOWN	SEDIMENTARY	UNKNOWN	UNKNOWN	LIMESTONE		3.23		8.71							1.2	25													3	700	30	10	50
D111211		USGS		Geochemistry of rock samples from the National Geochemical Database: U.S. Geological Survey, Reston, VA.	U.S. Geological Survey	USGS		40.1333	-80.25	0.01	71	71	71	UNKNOWN	SEDIMENTARY	UNKNOWN	UNKNOWN	LIMESTONE								3.92																	2	1000	7		15
D111212		USGS		Geochemistry of rock samples from the National Geochemical Database: U.S. Geological Survey, Reston, VA.	U.S. Geological Survey	USGS		40.1333	-80.25	0.01	71	71	71	UNKNOWN	SEDIMENTARY	UNKNOWN	UNKNOWN	LIMESTONE																									1	2000	15		10
D111213		USGS		Geochemistry of rock samples from the National Geochemical Database: U.S. Geological Survey, Reston, VA.	U.S. Geological Survey	USGS		40.1333	-80.25	0.01	71	71	71	UNKNOWN	SEDIMENTARY	UNKNOWN	UNKNOWN	LIMESTONE																									0.7	1000	7		5
D111214		USGS		Geochemistry of rock samples from the National Geochemical Database: U.S. Geological Survey, Reston, VA.	U.S. Geological Survey	USGS		40.1333	-80.25	0.01	71	71	71	MISC	SEDIMENTARY	UNKNOWN	UNKNOWN	LIMESTONE																		24.1
D111214		USGS		Geochemistry of rock samples from the National Geochemical Database: U.S. Geological Survey, Reston, VA.	U.S. Geological Survey	USGS		40.1333	-80.25	0.01	71	71	71	UNKNOWN	SEDIMENTARY	UNKNOWN	UNKNOWN	LIMESTONE		2.64		8.3				11.6			3	18.7				1.26									5	2000	20		50
D111215		USGS		Geochemistry of rock samples from the National Geochemical Database: U.S. Geological Survey, Reston, VA.	U.S. Geological Survey	USGS		40.1333	-80.25	0.01	70	70	70	UNKNOWN	SEDIMENTARY	UNKNOWN	UNKNOWN	LIMESTONE																									1.5	2000	7		7
D111216		USGS		Geochemistry of rock samples from the National Geochemical Database: U.S. Geological Survey, Reston, VA.	U.S. Geological Survey	USGS		40.1333	-80.25	0.01	70	70	70	MISC	SEDIMENTARY	UNKNOWN	UNKNOWN	LIMESTONE																		38
D111216		USGS		Geochemistry of rock samples from the National Geochemical Database: U.S. Geological Survey, Reston, VA.	U.S. Geological Survey	USGS		40.1333	-80.25	0.01	70	70	70	UNKNOWN	SEDIMENTARY	UNKNOWN	UNKNOWN	LIMESTONE		1.15		2.83				1.18			2.3	43.6													1	1000	10		7
D111217		USGS		Geochemistry of rock samples from the National Geochemical Database: U.S. Geological Survey, Reston, VA.	U.S. Geological Survey	USGS		40.1333	-80.25	0.01	70	70	70	UNKNOWN	SEDIMENTARY	UNKNOWN	UNKNOWN	LIMESTONE								1.79																	1.5	1000	10		7
D111218		USGS		Geochemistry of rock samples from the National Geochemical Database: U.S. Geological Survey, Reston, VA.	U.S. Geological Survey	USGS		40.1333	-80.25	0.01	70	70	70	UNKNOWN	SEDIMENTARY	UNKNOWN	UNKNOWN	LIMESTONE								0.61																	0.7	1500	7		7
D111219		USGS		Geochemistry of rock samples from the National Geochemical Database: U.S. Geological Survey, Reston, VA.	U.S. Geological Survey	USGS		40.1333	-80	0.01	70	70	70	MISC	SEDIMENTARY	UNKNOWN	UNKNOWN	LIMESTONE																		29.5
D111219		USGS		Geochemistry of rock samples from the National Geochemical Database: U.S. Geological Survey, Reston, VA.	U.S. Geological Survey	USGS		40.1333	-80	0.01	70	70	70	UNKNOWN	SEDIMENTARY	UNKNOWN	UNKNOWN	LIMESTONE		3.08		4.3							13.3	19.5													1.5	500	20		20
D111220		USGS		Geochemistry of rock samples from the National Geochemical Database: U.S. Geological Survey, Reston, VA.	U.S. Geological Survey	USGS		40.1333	-80.25	0.01	70	70	70	UNKNOWN	SEDIMENTARY	UNKNOWN	UNKNOWN	LIMESTONE																0.01									0.3	500			5
D111221		USGS		Geochemistry of rock samples from the National Geochemical Database: U.S. Geological Survey, Reston, VA.	U.S. Geological Survey	USGS		40.1333	-80.25	0.01	70	70	70	UNKNOWN	SEDIMENTARY	UNKNOWN	UNKNOWN	LIMESTONE																0.02									0.7	200	7		7
D111222		USGS		Geochemistry of rock samples from the National Geochemical Database: U.S. Geological Survey, Reston, VA.	U.S. Geological Survey	USGS		40.1333	-80.1333	0.01	71	71	71	UNKNOWN	SEDIMENTARY	UNKNOWN	UNKNOWN	LIMESTONE								4.8								0.19									3	3000	20	10	20
D111223		USGS		Geochemistry of rock samples from the National Geochemical Database: U.S. Geological Survey, Reston, VA.	U.S. Geological Survey	USGS		40.1333	-80.1333	0.01	71	71	71	UNKNOWN	SEDIMENTARY	UNKNOWN	UNKNOWN	LIMESTONE																									1	2000	10		3
D111224		USGS		Geochemistry of rock samples from the National Geochemical Database: U.S. Geological Survey, Reston, VA.	U.S. Geological Survey	USGS		40.1333	-80.1333	0.01	71	71	71	UNKNOWN	SEDIMENTARY	UNKNOWN	UNKNOWN	LIMESTONE								0.94																	1.5	700	20		20
D111225		USGS		Geochemistry of rock samples from the National Geochemical Database: U.S. Geological Survey, Reston, VA.	U.S. Geological Survey	USGS		40.1333	-80.1333	0.01	71	71	71	UNKNOWN	SEDIMENTARY	UNKNOWN	UNKNOWN	LIMESTONE																									1	700	15		10
D111226		USGS		Geochemistry of rock samples from the National Geochemical Database: U.S. Geological Survey, Reston, VA.	U.S. Geological Survey	USGS		40.1333	-80.1333	0.01	71	71	71	UNKNOWN	SEDIMENTARY	UNKNOWN	UNKNOWN	LIMESTONE																									1	500	10		7
D111227		USGS		Geochemistry of rock samples from the National Geochemical Database: U.S. Geological Survey, Reston, VA.	U.S. Geological Survey	USGS		40	-80.1333	0.01	71	71	71	UNKNOWN	SEDIMENTARY	UNKNOWN	UNKNOWN	LIMESTONE																0.09									1	2000	7		7
D111228		USGS		Geochemistry of rock samples from the National Geochemical Database: U.S. Geological Survey, Reston, VA.	U.S. Geological Survey	USGS		40	-80.1333	0.01	71	71	71	UNKNOWN	SEDIMENTARY	UNKNOWN	UNKNOWN	LIMESTONE								6.75								0.47									3	7000	5		7
D111229		USGS		Geochemistry of rock samples from the National Geochemical Database: U.S. Geological Survey, Reston, VA.	U.S. Geological Survey	USGS		40	-80.1333	0.01	71	71	71	UNKNOWN	SEDIMENTARY	UNKNOWN	UNKNOWN	LIMESTONE																0.11									1	1000	5		5
D111230		USGS		Geochemistry of rock samples from the National Geochemical Database: U.S. Geological Survey, Reston, VA.	U.S. Geological Survey	USGS		40	-80.1333	0.01	71	71	71	UNKNOWN	SEDIMENTARY	UNKNOWN	UNKNOWN	LIMESTONE								1.91																	1	1000	7		10
D111231		USGS		Geochemistry of rock samples from the National Geochemical Database: U.S. Geological Survey, Reston, VA.	U.S. Geological Survey	USGS		40	-80.1333	0.01	71	71	71	UNKNOWN	SEDIMENTARY	UNKNOWN	UNKNOWN	LIMESTONE																									0.7	700	7		10
D111232		USGS		Geochemistry of rock samples from the National Geochemical Database: U.S. Geological Survey, Reston, VA.	U.S. Geological Survey	USGS		40	-80.1333	0.01	71	71	71	UNKNOWN	SEDIMENTARY	UNKNOWN	UNKNOWN	LIMESTONE																0.2									1	1500	7		10
D111233		USGS		Geochemistry of rock samples from the National Geochemical Database: U.S. Geological Survey, Reston, VA.	U.S. Geological Survey	USGS		40	-80.1333	0.01	71	70.5	70	UNKNOWN	SEDIMENTARY	UNKNOWN	UNKNOWN	LIMESTONE								3.4								0.14									2	500	5		20
D111234		USGS		Geochemistry of rock samples from the National Geochemical Database: U.S. Geological Survey, Reston, VA.	U.S. Geological Survey	USGS		40	-80.1333	0.01	71	70.5	70	UNKNOWN	SEDIMENTARY	UNKNOWN	UNKNOWN	LIMESTONE																									3	700	5		15
D111235		USGS		Geochemistry of rock samples from the National Geochemical Database: U.S. Geological Survey, Reston, VA.	U.S. Geological Survey	USGS		40	-80.1333	0.01	71	70.5	70	UNKNOWN	SEDIMENTARY	UNKNOWN	UNKNOWN	LIMESTONE																0.02									1.5	1500	20		5
D111236		USGS		Geochemistry of rock samples from the National Geochemical Database: U.S. Geological Survey, Reston, VA.	U.S. Geological Survey	USGS		40	-80.1333	0.01	71	71	71	UNKNOWN	SEDIMENTARY	UNKNOWN	UNKNOWN	LIMESTONE								0.81																	0.7	700			2
D111237		USGS		Geochemistry of rock samples from the National Geochemical Database: U.S. Geological Survey, Reston, VA.	U.S. Geological Survey	USGS		40	-80.1333	0.01	71	71	71	UNKNOWN	SEDIMENTARY	UNKNOWN	UNKNOWN	LIMESTONE																									0.5	1500			5
D111238		USGS		Geochemistry of rock samples from the National Geochemical Database: U.S. Geological Survey, Reston, VA.	U.S. Geological Survey	USGS		40	-80	0.01	71	71	71	UNKNOWN	SEDIMENTARY	UNKNOWN	UNKNOWN	LIMESTONE								16.6								0.57									7	1500	20	10	10
D111239		USGS		Geochemistry of rock samples from the National Geochemical Database: U.S. Geological Survey, Reston, VA.	U.S. Geological Survey	USGS		40	-80	0.01	70	70	70	UNKNOWN	SEDIMENTARY	UNKNOWN	UNKNOWN	LIMESTONE																									1	500			5
D111240		USGS		Geochemistry of rock samples from the National Geochemical Database: U.S. Geological Survey, Reston, VA.	U.S. Geological Survey	USGS		40	-80	0.01	70	70	70	UNKNOWN	SEDIMENTARY	UNKNOWN	UNKNOWN	LIMESTONE																									1	700			5
D111241		USGS		Geochemistry of rock samples from the National Geochemical Database: U.S. Geological Survey, Reston, VA.	U.S. Geological Survey	USGS		40	-80	0.01	70	70	70	UNKNOWN	SEDIMENTARY	UNKNOWN	UNKNOWN	LIMESTONE																									1	500			5
D111242		USGS		Geochemistry of rock samples from the National Geochemical Database: U.S. Geological Survey, Reston, VA.	U.S. Geological Survey	USGS		40	-80	0.01	70	70	70	UNKNOWN	SEDIMENTARY	UNKNOWN	UNKNOWN	LIMESTONE																									2	700	20		15
D111243		USGS		Geochemistry of rock samples from the National Geochemical Database: U.S. Geological Survey, Reston, VA.	U.S. Geological Survey	USGS		40	-80	0.01	70	70	70	UNKNOWN	SEDIMENTARY	UNKNOWN	UNKNOWN	LIMESTONE																									1	500			3
D111244		USGS		Geochemistry of rock samples from the National Geochemical Database: U.S. Geological Survey, Reston, VA.	U.S. Geological Survey	USGS		40.1333	-80	0.01	70	70	70	UNKNOWN	SEDIMENTARY	UNKNOWN	UNKNOWN	LIMESTONE																									0.5	300			1.5
D111245		USGS		Geochemistry of rock samples from the National Geochemical Database: U.S. Geological Survey, Reston, VA.	U.S. Geological Survey	USGS		40.1333	-80	0.01	70	70	70	UNKNOWN	SEDIMENTARY	UNKNOWN	UNKNOWN	LIMESTONE																									0.5	1000			7
D111246		USGS		Geochemistry of rock samples from the National Geochemical Database: U.S. Geological Survey, Reston, VA.	U.S. Geological Survey	USGS		40.1333	-80	0.01	70	70	70	MISC	SEDIMENTARY	UNKNOWN	UNKNOWN	LIMESTONE																		38.6
D111246		USGS		Geochemistry of rock samples from the National Geochemical Database: U.S. Geological Survey, Reston, VA.	U.S. Geological Survey	USGS		40.1333	-80	0.01	70	70	70	UNKNOWN	SEDIMENTARY	UNKNOWN	UNKNOWN	LIMESTONE		1.3		3.27							11.7	27.5													1	500	7		5
D111247		USGS		Geochemistry of rock samples from the National Geochemical Database: U.S. Geological Survey, Reston, VA.	U.S. Geological Survey	USGS		40.1333	-79.8833	0.01	70	70	70	UNKNOWN	SEDIMENTARY	UNKNOWN	UNKNOWN	LIMESTONE																									0.5	500	5		10
D111248		USGS		Geochemistry of rock samples from the National Geochemical Database: U.S. Geological Survey, Reston, VA.	U.S. Geological Survey	USGS		40.1333	-79.8833	0.01	70	70	70	UNKNOWN	SEDIMENTARY	UNKNOWN	UNKNOWN	LIMESTONE																									0.2	300			5
D111249		USGS		Geochemistry of rock samples from the National Geochemical Database: U.S. Geological Survey, Reston, VA.	U.S. Geological Survey	USGS		40.25	-80	0.01	71	70.5	70	UNKNOWN	SEDIMENTARY	UNKNOWN	UNKNOWN	LIMESTONE																									2	700	7		10
D111250		USGS		Geochemistry of rock samples from the National Geochemical Database: U.S. Geological Survey, Reston, VA.	U.S. Geological Survey	USGS		40.25	-80	0.01	70	70	70	UNKNOWN	SEDIMENTARY	UNKNOWN	UNKNOWN	LIMESTONE																0.07									1.5	700	7		5
D111251		USGS		Geochemistry of rock samples from the National Geochemical Database: U.S. Geological Survey, Reston, VA.	U.S. Geological Survey	USGS		40.25	-80	0.01	70	70	70	UNKNOWN	SEDIMENTARY	UNKNOWN	UNKNOWN	LIMESTONE																0.06									1	1000	7		7
D111252		USGS		Geochemistry of rock samples from the National Geochemical Database: U.S. Geological Survey, Reston, VA.	U.S. Geological Survey	USGS		40.25	-80	0.01	70	70	70	UNKNOWN	SEDIMENTARY	UNKNOWN	UNKNOWN	LIMESTONE																									0.5	1500			3
D111253		USGS		Geochemistry of rock samples from the National Geochemical Database: U.S. Geological Survey, Reston, VA.	U.S. Geological Survey	USGS		40.25	-80	0.01	70	70	70	UNKNOWN	SEDIMENTARY	UNKNOWN	UNKNOWN	LIMESTONE																0.08									2	700	15		7
D111254		USGS		Geochemistry of rock samples from the National Geochemical Database: U.S. Geological Survey, Reston, VA.	U.S. Geological Survey	USGS		40.25	-80	0.01	70	70	70	UNKNOWN	SEDIMENTARY	UNKNOWN	UNKNOWN	LIMESTONE																									1	1000	7		5
D111255		USGS		Geochemistry of rock samples from the National Geochemical Database: U.S. Geological Survey, Reston, VA.	U.S. Geological Survey	USGS		40.25	-80	0.01	70	70	70	UNKNOWN	SEDIMENTARY	UNKNOWN	UNKNOWN	LIMESTONE																									1.5	500	20		10
D111256		USGS		Geochemistry of rock samples from the National Geochemical Database: U.S. Geological Survey, Reston, VA.	U.S. Geological Survey	USGS		40.25	-80	0.01	70	70	70	UNKNOWN	SEDIMENTARY	UNKNOWN	UNKNOWN	LIMESTONE																0.03									0.7	500	7		7
D111257		USGS		Geochemistry of rock samples from the National Geochemical Database: U.S. Geological Survey, Reston, VA.	U.S. Geological Survey	USGS		40.25	-80	0.01	70	70	70	UNKNOWN	SEDIMENTARY	UNKNOWN	UNKNOWN	LIMESTONE																									0.7	500	10		10
D111258		USGS		Geochemistry of rock samples from the National Geochemical Database: U.S. Geological Survey, Reston, VA.	U.S. Geological Survey	USGS		40.25	-80	0.01	70	70	70	UNKNOWN	SEDIMENTARY	UNKNOWN	UNKNOWN	LIMESTONE																0.07									1	300	15		20
D111259		USGS		Geochemistry of rock samples from the National Geochemical Database: U.S. Geological Survey, Reston, VA.	U.S. Geological Survey	USGS		40.25	-80	0.01	70	70	70	UNKNOWN	SEDIMENTARY	UNKNOWN	UNKNOWN	LIMESTONE																									1	500	15		10
D111260		USGS		Geochemistry of rock samples from the National Geochemical Database: U.S. Geological Survey, Reston, VA.	U.S. Geological Survey	USGS		40.25	-80	0.01	70	70	70	UNKNOWN	SEDIMENTARY	UNKNOWN	UNKNOWN	LIMESTONE																0.03									0.7	700	7		15
D111261		USGS		Geochemistry of rock samples from the National Geochemical Database: U.S. Geological Survey, Reston, VA.	U.S. Geological Survey	USGS		40.25	-80	0.01	70	70	70	MISC	SEDIMENTARY	UNKNOWN	UNKNOWN	LIMESTONE																		38.5
D111261		USGS		Geochemistry of rock samples from the National Geochemical Database: U.S. Geological Survey, Reston, VA.	U.S. Geological Survey	USGS		40.25	-80	0.01	70	70	70	UNKNOWN	SEDIMENTARY	UNKNOWN	UNKNOWN	LIMESTONE		1.32		2.34							11.1	30.7				0.06									1.5	1000	15		7
D111262		USGS		Geochemistry of rock samples from the National Geochemical Database: U.S. Geological Survey, Reston, VA.	U.S. Geological Survey	USGS		40.25	-80	0.01	70	70	70	UNKNOWN	SEDIMENTARY	UNKNOWN	UNKNOWN	LIMESTONE																									1	1500	15		15
D115507		USGS		Geochemistry of rock samples from the National Geochemical Database: U.S. Geological Survey, Reston, VA.	U.S. Geological Survey	USGS		32.3833	-109.133	0.01	69	69	69	MISC	SEDIMENTARY	UNKNOWN	UNKNOWN	LIMESTONE																		44.4
D115507		USGS		Geochemistry of rock samples from the National Geochemical Database: U.S. Geological Survey, Reston, VA.	U.S. Geological Survey	USGS		32.3833	-109.133	0.01	69	69	69	UNKNOWN	SEDIMENTARY	UNKNOWN	UNKNOWN	LIMESTONE		2.2	0.05	1.1				0.42		0.05	20.5	30.9			0.37	0.04									0.35	140	2.4	3.2	5		62
D115508		USGS		Geochemistry of rock samples from the National Geochemical Database: U.S. Geological Survey, Reston, VA.	U.S. Geological Survey	USGS		32.1333	-109.5	0.01	69	68	67	MISC	SEDIMENTARY	UNKNOWN	UNKNOWN	LIMESTONE																		42.4
D115508		USGS		Geochemistry of rock samples from the National Geochemical Database: U.S. Geological Survey, Reston, VA.	U.S. Geological Survey	USGS		32.1333	-109.5	0.01	69	68	67	UNKNOWN	SEDIMENTARY	UNKNOWN	UNKNOWN	LIMESTONE		6	0.05	1.2				0.46		0.09	19.7	28.8			0.25	0.13									0.41	270	5.4	2.2	1.9		100
D115511		USGS		Geochemistry of rock samples from the National Geochemical Database: U.S. Geological Survey, Reston, VA.	U.S. Geological Survey	USGS		36	-112	0.01	67	67	67	MISC	SEDIMENTARY	UNKNOWN	UNKNOWN	LIMESTONE																		32
D115511		USGS		Geochemistry of rock samples from the National Geochemical Database: U.S. Geological Survey, Reston, VA.	U.S. Geological Survey	USGS		36	-112	0.01	67	67	67	UNKNOWN	SEDIMENTARY	UNKNOWN	UNKNOWN	LIMESTONE		22	0.19	3.8		1.2		0.3		0.04	2.2	35.4			2.6	0.04									0.98	340	6.7	4.9	2.4		120
D115512		USGS		Geochemistry of rock samples from the National Geochemical Database: U.S. Geological Survey, Reston, VA.	U.S. Geological Survey	USGS		38.8833	-104.883	0.01	69	69	69	MISC	SEDIMENTARY	UNKNOWN	UNKNOWN	LIMESTONE																		40.9
D115512		USGS		Geochemistry of rock samples from the National Geochemical Database: U.S. Geological Survey, Reston, VA.	U.S. Geological Survey	USGS		38.8833	-104.883	0.01	69	69	69	UNKNOWN	SEDIMENTARY	UNKNOWN	UNKNOWN	LIMESTONE		6.8	0.07	1.4		0.5		0.42		0.08	12.1	36			0.87	0.05									0.82	560		5	7
D115513		USGS		Geochemistry of rock samples from the National Geochemical Database: U.S. Geological Survey, Reston, VA.	U.S. Geological Survey	USGS		38.8833	-104.883	0.01	69	69	69	MISC	SEDIMENTARY	UNKNOWN	UNKNOWN	LIMESTONE																		40.8
D115513		USGS		Geochemistry of rock samples from the National Geochemical Database: U.S. Geological Survey, Reston, VA.	U.S. Geological Survey	USGS		38.8833	-104.883	0.01	69	69	69	UNKNOWN	SEDIMENTARY	UNKNOWN	UNKNOWN	LIMESTONE		6.3	0.06	1.4		0.4		0.4		0.08	12.1	36			0.88	0.05									0.8	520			7
D115515		USGS		Geochemistry of rock samples from the National Geochemical Database: U.S. Geological Survey, Reston, VA.	U.S. Geological Survey	USGS		39.1333	-114.5	0.01	69	68	67	MISC	SEDIMENTARY	UNKNOWN	UNKNOWN	LIMESTONE																		37.9
D115515		USGS		Geochemistry of rock samples from the National Geochemical Database: U.S. Geological Survey, Reston, VA.	U.S. Geological Survey	USGS		39.1333	-114.5	0.01	69	68	67	UNKNOWN	SEDIMENTARY	UNKNOWN	UNKNOWN	LIMESTONE		12.7	0.05	0.8		0.4		0.1		0.02	1.5	45.9			0.12	0.21									0.3	180	3	2.9	0.46		40
D115517		USGS		Geochemistry of rock samples from the National Geochemical Database: U.S. Geological Survey, Reston, VA.	U.S. Geological Survey	USGS		38.8833	-104.883	0.01	69	69	69	MISC	SEDIMENTARY	UNKNOWN	UNKNOWN	LIMESTONE																		40.6
D115517		USGS		Geochemistry of rock samples from the National Geochemical Database: U.S. Geological Survey, Reston, VA.	U.S. Geological Survey	USGS		38.8833	-104.883	0.01	69	69	69	UNKNOWN	SEDIMENTARY	UNKNOWN	UNKNOWN	LIMESTONE		9.1	0.07	1.5		0.4		0.38		0.07	12.5	33.2			0.88	0.05									0.76	510			150
D115518		USGS		Geochemistry of rock samples from the National Geochemical Database: U.S. Geological Survey, Reston, VA.	U.S. Geological Survey	USGS		38.8833	-104.883	0.01	69	69	69	MISC	SEDIMENTARY	UNKNOWN	UNKNOWN	LIMESTONE																		40.8
D115518		USGS		Geochemistry of rock samples from the National Geochemical Database: U.S. Geological Survey, Reston, VA.	U.S. Geological Survey	USGS		38.8833	-104.883	0.01	69	69	69	UNKNOWN	SEDIMENTARY	UNKNOWN	UNKNOWN	LIMESTONE		9.7	0.07	1.8		0.06		0.38		0.07	12	32.9			0.85	0.05									0.84	560			5
D115520		USGS		Geochemistry of rock samples from the National Geochemical Database: U.S. Geological Survey, Reston, VA.	U.S. Geological Survey	USGS		38.8833	-104.883	0.01	69	69	69	MISC	SEDIMENTARY	UNKNOWN	UNKNOWN	LIMESTONE																		40.8
D115520		USGS		Geochemistry of rock samples from the National Geochemical Database: U.S. Geological Survey, Reston, VA.	U.S. Geological Survey	USGS		38.8833	-104.883	0.01	69	69	69	UNKNOWN	SEDIMENTARY	UNKNOWN	UNKNOWN	LIMESTONE		6.8	0.06	0.9		0.54		0.42		0.07	12.8	35.7			0.86	0.04									0.82	560			5
D115521		USGS		Geochemistry of rock samples from the National Geochemical Database: U.S. Geological Survey, Reston, VA.	U.S. Geological Survey	USGS		38.8833	-104.883	0.01	69	69	69	MISC	SEDIMENTARY	UNKNOWN	UNKNOWN	LIMESTONE																		40.8
D115521		USGS		Geochemistry of rock samples from the National Geochemical Database: U.S. Geological Survey, Reston, VA.	U.S. Geological Survey	USGS		38.8833	-104.883	0.01	69	69	69	UNKNOWN	SEDIMENTARY	UNKNOWN	UNKNOWN	LIMESTONE		9.1	0.06	1.2		0.46		0.42		0.07	12	35.4			0.85	0.05									0.76	510			7
D115522		USGS		Geochemistry of rock samples from the National Geochemical Database: U.S. Geological Survey, Reston, VA.	U.S. Geological Survey	USGS		32.1333	-109.5	0.01	69	68	67	MISC	SEDIMENTARY	UNKNOWN	UNKNOWN	LIMESTONE																		45.8
D115522		USGS		Geochemistry of rock samples from the National Geochemical Database: U.S. Geological Survey, Reston, VA.	U.S. Geological Survey	USGS		32.1333	-109.5	0.01	69	68	67	UNKNOWN	SEDIMENTARY	UNKNOWN	UNKNOWN	LIMESTONE		1.1	0.03	0.4		0.13		0.22		0.04	20.6	30.2			0.19	0.04									0.29	170	5.1		0.52
D115523		USGS		Geochemistry of rock samples from the National Geochemical Database: U.S. Geological Survey, Reston, VA.	U.S. Geological Survey	USGS		38.5	-106.5	0.01	69	69	69	MISC	SEDIMENTARY	UNKNOWN	UNKNOWN	LIMESTONE																		47.4
D115523		USGS		Geochemistry of rock samples from the National Geochemical Database: U.S. Geological Survey, Reston, VA.	U.S. Geological Survey	USGS		38.5	-106.5	0.01	69	69	69	UNKNOWN	SEDIMENTARY	UNKNOWN	UNKNOWN	LIMESTONE		0.7	0.02	0.5		0.05		0.1		0.04	21.5	30.5			0.1										0.11	160			0.47
D115524		USGS		Geochemistry of rock samples from the National Geochemical Database: U.S. Geological Survey, Reston, VA.	U.S. Geological Survey	USGS		38.8833	-104.883	0.01	69	69	69	MISC	SEDIMENTARY	UNKNOWN	UNKNOWN	LIMESTONE																		40.7
D115524		USGS		Geochemistry of rock samples from the National Geochemical Database: U.S. Geological Survey, Reston, VA.	U.S. Geological Survey	USGS		38.8833	-104.883	0.01	69	69	69	UNKNOWN	SEDIMENTARY	UNKNOWN	UNKNOWN	LIMESTONE		9.5	0.07	1.5		0.51		0.4		0.08	12.9	33.2			0.86	0.05									0.86	560			15
D115526		USGS		Geochemistry of rock samples from the National Geochemical Database: U.S. Geological Survey, Reston, VA.	U.S. Geological Survey	USGS		32.8833	-107.217	0.01	69	69	69	MISC	SEDIMENTARY	UNKNOWN	UNKNOWN	LIMESTONE																		33.3
D115526		USGS		Geochemistry of rock samples from the National Geochemical Database: U.S. Geological Survey, Reston, VA.	U.S. Geological Survey	USGS		32.8833	-107.217	0.01	69	69	69	UNKNOWN	SEDIMENTARY	UNKNOWN	UNKNOWN	LIMESTONE		16.7	0.17	1.8		0.73		0.18		0.09	0.88	42.6		0.08	1.1	1.6									0.56	260	2.6		2
D115527		USGS		Geochemistry of rock samples from the National Geochemical Database: U.S. Geological Survey, Reston, VA.	U.S. Geological Survey	USGS		44.5	-107	0.01	67	67	67	MISC	SEDIMENTARY	UNKNOWN	UNKNOWN	LIMESTONE																		25.8
D115527		USGS		Geochemistry of rock samples from the National Geochemical Database: U.S. Geological Survey, Reston, VA.	U.S. Geological Survey	USGS		44.5	-107	0.01	67	67	67	UNKNOWN	SEDIMENTARY	UNKNOWN	UNKNOWN	LIMESTONE		36.2	0.15	3.4		0.96		0.78		0.14	3	26.3			1.7	0.13									0.99	390	11	3.7	1		82
D115529		USGS		Geochemistry of rock samples from the National Geochemical Database: U.S. Geological Survey, Reston, VA.	U.S. Geological Survey	USGS		40	-113.75	0.01	67	67	67	MISC	SEDIMENTARY	UNKNOWN	UNKNOWN	LIMESTONE																		37.4
D115529		USGS		Geochemistry of rock samples from the National Geochemical Database: U.S. Geological Survey, Reston, VA.	U.S. Geological Survey	USGS		40	-113.75	0.01	67	67	67	UNKNOWN	SEDIMENTARY	UNKNOWN	UNKNOWN	LIMESTONE		10.1	0.13	3.4		0.73		0.22		0.02	1.9	44.7		0.06	0.86	0.04									0.57	300	12	4.8	3		93
D115530		USGS		Geochemistry of rock samples from the National Geochemical Database: U.S. Geological Survey, Reston, VA.	U.S. Geological Survey	USGS		32.75	-107.883	0.01	69	69	69	MISC	SEDIMENTARY	UNKNOWN	UNKNOWN	LIMESTONE																		40.4
D115530		USGS		Geochemistry of rock samples from the National Geochemical Database: U.S. Geological Survey, Reston, VA.	U.S. Geological Survey	USGS		32.75	-107.883	0.01	69	69	69	UNKNOWN	SEDIMENTARY	UNKNOWN	UNKNOWN	LIMESTONE		4.8	0.02	1.2		0.36		0.08			1.5	49.4			0.57	0.02									0.28	79	3.2	2.4	0.84		34
D115531		USGS		Geochemistry of rock samples from the National Geochemical Database: U.S. Geological Survey, Reston, VA.	U.S. Geological Survey	USGS		31.3833	-110.25	0.01	69	68	67	MISC	SEDIMENTARY	UNKNOWN	UNKNOWN	LIMESTONE																		34
D115531		USGS		Geochemistry of rock samples from the National Geochemical Database: U.S. Geological Survey, Reston, VA.	U.S. Geological Survey	USGS		31.3833	-110.25	0.01	69	68	67	UNKNOWN	SEDIMENTARY	UNKNOWN	UNKNOWN	LIMESTONE		13.3	0.15	2.5		0.5		0.46		0.06	1.1	44.7			1.6	0.25									0.62	280	14	3	1.4		120
D115532		USGS		Geochemistry of rock samples from the National Geochemical Database: U.S. Geological Survey, Reston, VA.	U.S. Geological Survey	USGS		38.8833	-104.883	0.01	69	69	69	MISC	SEDIMENTARY	UNKNOWN	UNKNOWN	LIMESTONE																		40.8
D115532		USGS		Geochemistry of rock samples from the National Geochemical Database: U.S. Geological Survey, Reston, VA.	U.S. Geological Survey	USGS		38.8833	-104.883	0.01	69	69	69	UNKNOWN	SEDIMENTARY	UNKNOWN	UNKNOWN	LIMESTONE		7.1	0.07	1.5		0.56		0.4		0.1	11.4	35.8			0.78	0.05									0.75	510			7
D115533		USGS		Geochemistry of rock samples from the National Geochemical Database: U.S. Geological Survey, Reston, VA.	U.S. Geological Survey	USGS		31.6333	-110	0.01	69	68	67	MISC	SEDIMENTARY	UNKNOWN	UNKNOWN	LIMESTONE																		39.5
D115533		USGS		Geochemistry of rock samples from the National Geochemical Database: U.S. Geological Survey, Reston, VA.	U.S. Geological Survey	USGS		31.6333	-110	0.01	69	68	67	UNKNOWN	SEDIMENTARY	UNKNOWN	UNKNOWN	LIMESTONE		5.5	0.05	1.5		0.32		0.62		0.02	2.2	48.7			0.36	0.02									0.73	390	9.6	4.1	59		160
D115535		USGS		Geochemistry of rock samples from the National Geochemical Database: U.S. Geological Survey, Reston, VA.	U.S. Geological Survey	USGS		41.5	-111.633	0.01	67	67	67	MISC	SEDIMENTARY	UNKNOWN	UNKNOWN	LIMESTONE																		40.8
D115535		USGS		Geochemistry of rock samples from the National Geochemical Database: U.S. Geological Survey, Reston, VA.	U.S. Geological Survey	USGS		41.5	-111.633	0.01	67	67	67	UNKNOWN	SEDIMENTARY	UNKNOWN	UNKNOWN	LIMESTONE		5.5	0.08	1.8		0.23		0.5			3.2	47.5			0.7	0.09									0.45	120	4.9	3.2	1.3		46
D115536		USGS		Geochemistry of rock samples from the National Geochemical Database: U.S. Geological Survey, Reston, VA.	U.S. Geological Survey	USGS		32.8833	-107.25	0.01	69	69	69	MISC	SEDIMENTARY	UNKNOWN	UNKNOWN	LIMESTONE																		34
D115536		USGS		Geochemistry of rock samples from the National Geochemical Database: U.S. Geological Survey, Reston, VA.	U.S. Geological Survey	USGS		32.8833	-107.25	0.01	69	69	69	UNKNOWN	SEDIMENTARY	UNKNOWN	UNKNOWN	LIMESTONE		21.3	0.02	0.87		0.11		0.24			0.6	43			0.23	0.09									0.19	150	5	2.1	0.75
D115537		USGS		Geochemistry of rock samples from the National Geochemical Database: U.S. Geological Survey, Reston, VA.	U.S. Geological Survey	USGS		32.1333	-109.633	0.01	69	68	67	MISC	SEDIMENTARY	UNKNOWN	UNKNOWN	LIMESTONE																		45.4
D115537		USGS		Geochemistry of rock samples from the National Geochemical Database: U.S. Geological Survey, Reston, VA.	U.S. Geological Survey	USGS		32.1333	-109.633	0.01	69	68	67	UNKNOWN	SEDIMENTARY	UNKNOWN	UNKNOWN	LIMESTONE		2.5	0.05	0.42		0.2		0.26		0.11	20.4	29.3		0.08	0.13	0.11									0.36	310	4.9
D115538		USGS		Geochemistry of rock samples from the National Geochemical Database: U.S. Geological Survey, Reston, VA.	U.S. Geological Survey	USGS		39.3833	-115.883	0.01	69	69	69	MISC	SEDIMENTARY	UNKNOWN	UNKNOWN	LIMESTONE																		34.3
D115538		USGS		Geochemistry of rock samples from the National Geochemical Database: U.S. Geological Survey, Reston, VA.	U.S. Geological Survey	USGS		39.3833	-115.883	0.01	69	69	69	UNKNOWN	SEDIMENTARY	UNKNOWN	UNKNOWN	LIMESTONE		18.7	0.07	0.99		0.16		0.04		0.1	0.5	43.5		0.08	0.25	0.47									0.14	290	9.5
D115539		USGS		Geochemistry of rock samples from the National Geochemical Database: U.S. Geological Survey, Reston, VA.	U.S. Geological Survey	USGS		38.8833	-104.883	0.01	69	69	69	MISC	SEDIMENTARY	UNKNOWN	UNKNOWN	LIMESTONE																		40.9
D115539		USGS		Geochemistry of rock samples from the National Geochemical Database: U.S. Geological Survey, Reston, VA.	U.S. Geological Survey	USGS		38.8833	-104.883	0.01	69	69	69	UNKNOWN	SEDIMENTARY	UNKNOWN	UNKNOWN	LIMESTONE		9	0.06	1.8		0.46		0.38		0.1	11	35.9		0.75	0.29	0.05									0.79	520			5
D115542		USGS		Geochemistry of rock samples from the National Geochemical Database: U.S. Geological Survey, Reston, VA.	U.S. Geological Survey	USGS		32.1333	-109.633	0.01	69	68	67	MISC	SEDIMENTARY	UNKNOWN	UNKNOWN	LIMESTONE																		45.7
D115542		USGS		Geochemistry of rock samples from the National Geochemical Database: U.S. Geological Survey, Reston, VA.	U.S. Geological Survey	USGS		32.1333	-109.633	0.01	69	68	67	UNKNOWN	SEDIMENTARY	UNKNOWN	UNKNOWN	LIMESTONE		2.6	0.05	0.4		0.17		0.22		0.12	15.8	34.6			0.07	0.1									0.34	290		2.3
D115545		USGS		Geochemistry of rock samples from the National Geochemical Database: U.S. Geological Survey, Reston, VA.	U.S. Geological Survey	USGS		33	-107.133	0.01	69	69	69	MISC	SEDIMENTARY	UNKNOWN	UNKNOWN	LIMESTONE																		30.6
D115545		USGS		Geochemistry of rock samples from the National Geochemical Database: U.S. Geological Survey, Reston, VA.	U.S. Geological Survey	USGS		33	-107.133	0.01	69	69	69	UNKNOWN	SEDIMENTARY	UNKNOWN	UNKNOWN	LIMESTONE		24.6	0.3	2.7		0.46		0.4		0.03	1	36.7			1.3	0.41									0.51	270	6.9	4.2	1.1
D115546		USGS		Geochemistry of rock samples from the National Geochemical Database: U.S. Geological Survey, Reston, VA.	U.S. Geological Survey	USGS		45.6333	-112.5	0.01	67	67	67	MISC	SEDIMENTARY	UNKNOWN	UNKNOWN	LIMESTONE																		45.7
D115546		USGS		Geochemistry of rock samples from the National Geochemical Database: U.S. Geological Survey, Reston, VA.	U.S. Geological Survey	USGS		45.6333	-112.5	0.01	67	67	67	UNKNOWN	SEDIMENTARY	UNKNOWN	UNKNOWN	LIMESTONE		1.4	0.02	0.65		1.2		2.1		0.16	18.9	29.4		0.06	0.14	0.08									1.7	440	22	5	9
D115547		USGS		Geochemistry of rock samples from the National Geochemical Database: U.S. Geological Survey, Reston, VA.	U.S. Geological Survey	USGS		38.8833	-104.883	0.01	69	69	69	MISC	SEDIMENTARY	UNKNOWN	UNKNOWN	LIMESTONE																		40.9
D115547		USGS		Geochemistry of rock samples from the National Geochemical Database: U.S. Geological Survey, Reston, VA.	U.S. Geological Survey	USGS		38.8833	-104.883	0.01	69	69	69	UNKNOWN	SEDIMENTARY	UNKNOWN	UNKNOWN	LIMESTONE		9.1	0.06	1.5		0.46		0.4		0.1	11.9	34.9			0.75	0.05									0.71	400			7
D115549		USGS		Geochemistry of rock samples from the National Geochemical Database: U.S. Geological Survey, Reston, VA.	U.S. Geological Survey	USGS		42.5	-108	0.01	67	67	67	MISC	SEDIMENTARY	UNKNOWN	UNKNOWN	LIMESTONE																		26.2
D115549		USGS		Geochemistry of rock samples from the National Geochemical Database: U.S. Geological Survey, Reston, VA.	U.S. Geological Survey	USGS		42.5	-108	0.01	67	67	67	UNKNOWN	SEDIMENTARY	UNKNOWN	UNKNOWN	LIMESTONE		35.2	0.09	2.9		0.86		0.1		0.06	0.4	33.5		0.1	1.6	0.08									0.52	280		2.7	0.84		56
D115551		USGS		Geochemistry of rock samples from the National Geochemical Database: U.S. Geological Survey, Reston, VA.	U.S. Geological Survey	USGS		38.8833	-104.883	0.01	69	69	69	MISC	SEDIMENTARY	UNKNOWN	UNKNOWN	LIMESTONE																		40.8
D115551		USGS		Geochemistry of rock samples from the National Geochemical Database: U.S. Geological Survey, Reston, VA.	U.S. Geological Survey	USGS		38.8833	-104.883	0.01	69	69	69	UNKNOWN	SEDIMENTARY	UNKNOWN	UNKNOWN	LIMESTONE		9.1	0.06	1.5		0.56		0.34		0.1	11.6	35.6		0.8	0.75	0.04									0.72	440			7
D115552		USGS		Geochemistry of rock samples from the National Geochemical Database: U.S. Geological Survey, Reston, VA.	U.S. Geological Survey	USGS		38.8833	-104.883	0.01	69	69	69	MISC	SEDIMENTARY	UNKNOWN	UNKNOWN	LIMESTONE																		40.8
D115552		USGS		Geochemistry of rock samples from the National Geochemical Database: U.S. Geological Survey, Reston, VA.	U.S. Geological Survey	USGS		38.8833	-104.883	0.01	69	69	69	UNKNOWN	SEDIMENTARY	UNKNOWN	UNKNOWN	LIMESTONE		9.1	0.06	1.7		0.46		0.4		0.1	11.5	34.1		0.8	0.75	0.04									0.71	440			5
D115553		USGS		Geochemistry of rock samples from the National Geochemical Database: U.S. Geological Survey, Reston, VA.	U.S. Geological Survey	USGS		38.8833	-104.883	0.01	69	69	69	MISC	SEDIMENTARY	UNKNOWN	UNKNOWN	LIMESTONE																		40.7
D115553		USGS		Geochemistry of rock samples from the National Geochemical Database: U.S. Geological Survey, Reston, VA.	U.S. Geological Survey	USGS		38.8833	-104.883	0.01	69	69	69	UNKNOWN	SEDIMENTARY	UNKNOWN	UNKNOWN	LIMESTONE		9.1	0.06	1.4		0.54		0.42		0.1	11.8	35.1		0.65	0.78	0.06									0.68	430			50
D115554		USGS		Geochemistry of rock samples from the National Geochemical Database: U.S. Geological Survey, Reston, VA.	U.S. Geological Survey	USGS		38.8833	-104.883	0.01	69	69	69	MISC	SEDIMENTARY	UNKNOWN	UNKNOWN	LIMESTONE																		40.9
D115554		USGS		Geochemistry of rock samples from the National Geochemical Database: U.S. Geological Survey, Reston, VA.	U.S. Geological Survey	USGS		38.8833	-104.883	0.01	69	69	69	UNKNOWN	SEDIMENTARY	UNKNOWN	UNKNOWN	LIMESTONE		9.1	0.05	1.5		0.52		0.44		0.09	11.7	34.6		0.75	0.75	0.06									0.69	430			5
D115555		USGS		Geochemistry of rock samples from the National Geochemical Database: U.S. Geological Survey, Reston, VA.	U.S. Geological Survey	USGS		40.5	-111.5	0.01	67	67	67	MISC	SEDIMENTARY	UNKNOWN	UNKNOWN	LIMESTONE																		39.9
D115555		USGS		Geochemistry of rock samples from the National Geochemical Database: U.S. Geological Survey, Reston, VA.	U.S. Geological Survey	USGS		40.5	-111.5	0.01	67	67	67	UNKNOWN	SEDIMENTARY	UNKNOWN	UNKNOWN	LIMESTONE		6.7	0.07	1.6		0.37		0.66		0.06	4.1	45.9			0.91	0.15									0.65	390	9	5.1	1.1		57
D115556		USGS		Geochemistry of rock samples from the National Geochemical Database: U.S. Geological Survey, Reston, VA.	U.S. Geological Survey	USGS		39.1333	-114.5	0.01	67	67	67	MISC	SEDIMENTARY	UNKNOWN	UNKNOWN	LIMESTONE																		41.7
D115556		USGS		Geochemistry of rock samples from the National Geochemical Database: U.S. Geological Survey, Reston, VA.	U.S. Geological Survey	USGS		39.1333	-114.5	0.01	67	67	67	UNKNOWN	SEDIMENTARY	UNKNOWN	UNKNOWN	LIMESTONE		2.5		0.56		0.15		0.04			1	51.6			0.08	0.21									0.061	90		1.8
D115557		USGS		Geochemistry of rock samples from the National Geochemical Database: U.S. Geological Survey, Reston, VA.	U.S. Geological Survey	USGS		37.25	-115.75	0.01	67	67	67	MISC	SEDIMENTARY	UNKNOWN	UNKNOWN	LIMESTONE																		47
D115557		USGS		Geochemistry of rock samples from the National Geochemical Database: U.S. Geological Survey, Reston, VA.	U.S. Geological Survey	USGS		37.25	-115.75	0.01	67	67	67	UNKNOWN	SEDIMENTARY	UNKNOWN	UNKNOWN	LIMESTONE		0.6		0.25				0.02			20.9	29.7													0.049	24	3.4		0.46
D115558		USGS		Geochemistry of rock samples from the National Geochemical Database: U.S. Geological Survey, Reston, VA.	U.S. Geological Survey	USGS		44.5	-107	0.01	67	67	67	MISC	SEDIMENTARY	UNKNOWN	UNKNOWN	LIMESTONE																		38.8
D115558		USGS		Geochemistry of rock samples from the National Geochemical Database: U.S. Geological Survey, Reston, VA.	U.S. Geological Survey	USGS		44.5	-107	0.01	67	67	67	UNKNOWN	SEDIMENTARY	UNKNOWN	UNKNOWN	LIMESTONE		9.5	0.02	0.85		0.9		0.18		0.12	1	47.7			0.53	0.21									0.71	800	12	10	35
D115559		USGS		Geochemistry of rock samples from the National Geochemical Database: U.S. Geological Survey, Reston, VA.	U.S. Geological Survey	USGS		36	-112	0.01	67	67	67	MISC	SEDIMENTARY	UNKNOWN	UNKNOWN	LIMESTONE																		41.6
D115559		USGS		Geochemistry of rock samples from the National Geochemical Database: U.S. Geological Survey, Reston, VA.	U.S. Geological Survey	USGS		36	-112	0.01	67	67	67	UNKNOWN	SEDIMENTARY	UNKNOWN	UNKNOWN	LIMESTONE		4.2	0.05	0.84		0.43		0.4		0.11	2.9	48.2		0.08	0.34										0.64	390	4.6	4.3	2		120
D115560		USGS		Geochemistry of rock samples from the National Geochemical Database: U.S. Geological Survey, Reston, VA.	U.S. Geological Survey	USGS		38.6333	-106.383	0.01	69	69	69	MISC	SEDIMENTARY	UNKNOWN	UNKNOWN	LIMESTONE																		44.8
D115563		USGS		Geochemistry of rock samples from the National Geochemical Database: U.S. Geological Survey, Reston, VA.	U.S. Geological Survey	USGS		38.8833	-104.883	0.01	69	69	69	UNKNOWN	SEDIMENTARY	UNKNOWN	UNKNOWN	LIMESTONE		6.6	0.05	1.1		0.44		0.42		0.13	11.7	37.5			0.78	0.06									0.67	410			7
D115560		USGS		Geochemistry of rock samples from the National Geochemical Database: U.S. Geological Survey, Reston, VA.	U.S. Geological Survey	USGS		38.6333	-106.383	0.01	69	69	69	UNKNOWN	SEDIMENTARY	UNKNOWN	UNKNOWN	LIMESTONE		2.5	0.05	1.2				0.18		0.07	20.6	29.6		0.08	0.29										0.16	140	2.7	1.1	0.5		72
D115561		USGS		Geochemistry of rock samples from the National Geochemical Database: U.S. Geological Survey, Reston, VA.	U.S. Geological Survey	USGS		38.8833	-104.883	0.01	69	69	69	MISC	SEDIMENTARY	UNKNOWN	UNKNOWN	LIMESTONE																		40.9
D115561		USGS		Geochemistry of rock samples from the National Geochemical Database: U.S. Geological Survey, Reston, VA.	U.S. Geological Survey	USGS		38.8833	-104.883	0.01	69	69	69	UNKNOWN	SEDIMENTARY	UNKNOWN	UNKNOWN	LIMESTONE		8.7	0.05	1.4		0.44		0.42		0.11	10.8	36.5			0.76	0.05									0.6	380			7
D115562		USGS		Geochemistry of rock samples from the National Geochemical Database: U.S. Geological Survey, Reston, VA.	U.S. Geological Survey	USGS		31.6333	-110	0.01	69	68	67	MISC	SEDIMENTARY	UNKNOWN	UNKNOWN	LIMESTONE																		32
D115562		USGS		Geochemistry of rock samples from the National Geochemical Database: U.S. Geological Survey, Reston, VA.	U.S. Geological Survey	USGS		31.6333	-110	0.01	69	68	67	UNKNOWN	SEDIMENTARY	UNKNOWN	UNKNOWN	LIMESTONE		20.7	0.2	3.6		0.94		0.78		0.22	1.1	36.5			1.4	0.17									1.1	750	8.8	6.5	2.6
D115563		USGS		Geochemistry of rock samples from the National Geochemical Database: U.S. Geological Survey, Reston, VA.	U.S. Geological Survey	USGS		38.8833	-104.883	0.01	69	69	69	MISC	SEDIMENTARY	UNKNOWN	UNKNOWN	LIMESTONE																		40.9
D115564		USGS		Geochemistry of rock samples from the National Geochemical Database: U.S. Geological Survey, Reston, VA.	U.S. Geological Survey	USGS		39	-114.5	0.01	67	67	67	MISC	SEDIMENTARY	UNKNOWN	UNKNOWN	LIMESTONE																		44.1
D115564		USGS		Geochemistry of rock samples from the National Geochemical Database: U.S. Geological Survey, Reston, VA.	U.S. Geological Survey	USGS		39	-114.5	0.01	67	67	67	UNKNOWN	SEDIMENTARY	UNKNOWN	UNKNOWN	LIMESTONE		0.85		0.1		0.08		0.06			3.4	50.5			0.13	0.02									0.11	58	6.6	2.7	0.55
D115565		USGS		Geochemistry of rock samples from the National Geochemical Database: U.S. Geological Survey, Reston, VA.	U.S. Geological Survey	USGS		47.8833	-108.5	0.01	69	68	67	MISC	SEDIMENTARY	UNKNOWN	UNKNOWN	LIMESTONE																		47.3
D115565		USGS		Geochemistry of rock samples from the National Geochemical Database: U.S. Geological Survey, Reston, VA.	U.S. Geological Survey	USGS		47.8833	-108.5	0.01	69	68	67	UNKNOWN	SEDIMENTARY	UNKNOWN	UNKNOWN	LIMESTONE		0.3		0.1				0.16		0.05	20.1	31.1		0.06	0.02	0.05									0.12	130	3.9		0.72
D115566		USGS		Geochemistry of rock samples from the National Geochemical Database: U.S. Geological Survey, Reston, VA.	U.S. Geological Survey	USGS		39	-114.5	0.01	69	68	67	MISC	SEDIMENTARY	UNKNOWN	UNKNOWN	LIMESTONE																		38.3
D115566		USGS		Geochemistry of rock samples from the National Geochemical Database: U.S. Geological Survey, Reston, VA.	U.S. Geological Survey	USGS		39	-114.5	0.01	69	68	67	UNKNOWN	SEDIMENTARY	UNKNOWN	UNKNOWN	LIMESTONE		9.1	0.02	0.45		0.25		0.14			1.4	51.4			0.21	0.14									0.18	110	4.4		1.8
D115567		USGS		Geochemistry of rock samples from the National Geochemical Database: U.S. Geological Survey, Reston, VA.	U.S. Geological Survey	USGS		42.75	-108	0.01	67	67	67	MISC	SEDIMENTARY	UNKNOWN	UNKNOWN	LIMESTONE																		23.1
D115567		USGS		Geochemistry of rock samples from the National Geochemical Database: U.S. Geological Survey, Reston, VA.	U.S. Geological Survey	USGS		42.75	-108	0.01	67	67	67	UNKNOWN	SEDIMENTARY	UNKNOWN	UNKNOWN	LIMESTONE		36.2	0.11	5.5		3.5		0.14		0.35	0.5	28.4		0.1	2.5	0.26									2.5	1400			5
D115568		USGS		Geochemistry of rock samples from the National Geochemical Database: U.S. Geological Survey, Reston, VA.	U.S. Geological Survey	USGS		43.3833	-108.133	0.01	67	67	67	MISC	SEDIMENTARY	UNKNOWN	UNKNOWN	LIMESTONE																		38.7
D115568		USGS		Geochemistry of rock samples from the National Geochemical Database: U.S. Geological Survey, Reston, VA.	U.S. Geological Survey	USGS		43.3833	-108.133	0.01	67	67	67	UNKNOWN	SEDIMENTARY	UNKNOWN	UNKNOWN	LIMESTONE		8.7	0.05	1.7		1.6		0.14		0.05	0.7	46			0.78	0.08									1.3	450			7
D115569		USGS		Geochemistry of rock samples from the National Geochemical Database: U.S. Geological Survey, Reston, VA.	U.S. Geological Survey	USGS		34.8833	-112.75	0.01	67	67	67	UNKNOWN	SEDIMENTARY	UNKNOWN	UNKNOWN	LIMESTONE																									1.8	400		10	200
D115570		USGS		Geochemistry of rock samples from the National Geochemical Database: U.S. Geological Survey, Reston, VA.	U.S. Geological Survey	USGS		32.8833	-110.633	0.01	69	68	67	MISC	SEDIMENTARY	UNKNOWN	UNKNOWN	LIMESTONE																		41.6
D115570		USGS		Geochemistry of rock samples from the National Geochemical Database: U.S. Geological Survey, Reston, VA.	U.S. Geological Survey	USGS		32.8833	-110.633	0.01	69	68	67	UNKNOWN	SEDIMENTARY	UNKNOWN	UNKNOWN	LIMESTONE		9.5	0.06	1		0.62		0.02		0.06	15.3	28.4			0.87	0.03									0.54	180			7
D115571		USGS		Geochemistry of rock samples from the National Geochemical Database: U.S. Geological Survey, Reston, VA.	U.S. Geological Survey	USGS		47.25	-112.5	0.01	67	67	67	MISC	SEDIMENTARY	UNKNOWN	UNKNOWN	LIMESTONE																		31.7
D115571		USGS		Geochemistry of rock samples from the National Geochemical Database: U.S. Geological Survey, Reston, VA.	U.S. Geological Survey	USGS		47.25	-112.5	0.01	67	67	67	UNKNOWN	SEDIMENTARY	UNKNOWN	UNKNOWN	LIMESTONE		20.7	0.07	4.3		0.77		0.66		0.08	1.1	40.1		0.45	1.4	0.06									1.7	560	50	10	10
D115572		USGS		Geochemistry of rock samples from the National Geochemical Database: U.S. Geological Survey, Reston, VA.	U.S. Geological Survey	USGS		36.6333	-115.25	0.01	67	67	67	MISC	SEDIMENTARY	UNKNOWN	UNKNOWN	LIMESTONE																		44.5
D115572		USGS		Geochemistry of rock samples from the National Geochemical Database: U.S. Geological Survey, Reston, VA.	U.S. Geological Survey	USGS		36.6333	-115.25	0.01	67	67	67	UNKNOWN	SEDIMENTARY	UNKNOWN	UNKNOWN	LIMESTONE		0.85		0.1		0.06		0.04			11.7	42.4			0.08	0.02									0.15	23			3
D115574		USGS		Geochemistry of rock samples from the National Geochemical Database: U.S. Geological Survey, Reston, VA.	U.S. Geological Survey	USGS		42.75	-108	0.01	67	67	67	UNKNOWN	SEDIMENTARY	UNKNOWN	UNKNOWN	LIMESTONE																									0.64	230			5
D115575		USGS		Geochemistry of rock samples from the National Geochemical Database: U.S. Geological Survey, Reston, VA.	U.S. Geological Survey	USGS		36	-111.867	0.01	67	67	67	MISC	SEDIMENTARY	UNKNOWN	UNKNOWN	LIMESTONE																		37.5
D115575		USGS		Geochemistry of rock samples from the National Geochemical Database: U.S. Geological Survey, Reston, VA.	U.S. Geological Survey	USGS		36	-111.867	0.01	67	67	67	UNKNOWN	SEDIMENTARY	UNKNOWN	UNKNOWN	LIMESTONE		13	0.2	3		3		4.5		1.2	14.2	23.5			1	0.04									1.4	1700	5.6	3.9	4.7		39
D115576		USGS		Geochemistry of rock samples from the National Geochemical Database: U.S. Geological Survey, Reston, VA.	U.S. Geological Survey	USGS		45.8833	-111.25	0.01	67	67	67	MISC	SEDIMENTARY	UNKNOWN	UNKNOWN	LIMESTONE																		42.8
D115594		USGS		Geochemistry of rock samples from the National Geochemical Database: U.S. Geological Survey, Reston, VA.	U.S. Geological Survey	USGS		38.8833	-104.883	0.01	69	69	69	MISC	SEDIMENTARY	UNKNOWN	UNKNOWN	LIMESTONE																		41.1
D115576		USGS		Geochemistry of rock samples from the National Geochemical Database: U.S. Geological Survey, Reston, VA.	U.S. Geological Survey	USGS		45.8833	-111.25	0.01	67	67	67	UNKNOWN	SEDIMENTARY	UNKNOWN	UNKNOWN	LIMESTONE		1.6		0.46		0.24		0.14			1.4	51.2			0.3	0.06									0.2	160	3.9	2.5	1.4
D115578		USGS		Geochemistry of rock samples from the National Geochemical Database: U.S. Geological Survey, Reston, VA.	U.S. Geological Survey	USGS		37.25	-115.25	0.01	67	67	67	MISC	SEDIMENTARY	UNKNOWN	UNKNOWN	LIMESTONE																		48.9
D115578		USGS		Geochemistry of rock samples from the National Geochemical Database: U.S. Geological Survey, Reston, VA.	U.S. Geological Survey	USGS		37.25	-115.25	0.01	67	67	67	UNKNOWN	SEDIMENTARY	UNKNOWN	UNKNOWN	LIMESTONE								0.02		0.03	20.3	32.1														36	2.7		0.6
D115579		USGS		Geochemistry of rock samples from the National Geochemical Database: U.S. Geological Survey, Reston, VA.	U.S. Geological Survey	USGS		45.6333	-112.633	0.01	67	67	67	MISC	SEDIMENTARY	UNKNOWN	UNKNOWN	LIMESTONE																		46.2
D115579		USGS		Geochemistry of rock samples from the National Geochemical Database: U.S. Geological Survey, Reston, VA.	U.S. Geological Survey	USGS		45.6333	-112.633	0.01	67	67	67	UNKNOWN	SEDIMENTARY	UNKNOWN	UNKNOWN	LIMESTONE		1.4	0.04	0.66		0.17		0.66		0.11	20.4	29.2			0.13	0.03									0.51	230	2.6	1.5	0.74		50
D115580		USGS		Geochemistry of rock samples from the National Geochemical Database: U.S. Geological Survey, Reston, VA.	U.S. Geological Survey	USGS		34.5	-115.383	0.01	67	67	67	MISC	SEDIMENTARY	UNKNOWN	UNKNOWN	LIMESTONE																		9.6
D115580		USGS		Geochemistry of rock samples from the National Geochemical Database: U.S. Geological Survey, Reston, VA.	U.S. Geological Survey	USGS		34.5	-115.383	0.01	67	67	67	UNKNOWN	SEDIMENTARY	UNKNOWN	UNKNOWN	LIMESTONE		64.2	0.54	8.7		2.1		0.24		0.1	3.4	6.3		1.2	3.1	0.15									1.6	700		7	7
D115582		USGS		Geochemistry of rock samples from the National Geochemical Database: U.S. Geological Survey, Reston, VA.	U.S. Geological Survey	USGS		44.5	-107	0.01	67	67	67	MISC	SEDIMENTARY	UNKNOWN	UNKNOWN	LIMESTONE																		31.5
D115600		USGS		Geochemistry of rock samples from the National Geochemical Database: U.S. Geological Survey, Reston, VA.	U.S. Geological Survey	USGS		33	-107.133	0.01	69	69	69	MISC	SEDIMENTARY	UNKNOWN	UNKNOWN	LIMESTONE																		41.1
D115582		USGS		Geochemistry of rock samples from the National Geochemical Database: U.S. Geological Survey, Reston, VA.	U.S. Geological Survey	USGS		44.5	-107	0.01	67	67	67	UNKNOWN	SEDIMENTARY	UNKNOWN	UNKNOWN	LIMESTONE		22	0.06	2.7		1.4		0.38		0.15	0.5	39			1.6	0.34									0.94	490	3	5	2.3
D115583		USGS		Geochemistry of rock samples from the National Geochemical Database: U.S. Geological Survey, Reston, VA.	U.S. Geological Survey	USGS		47.8833	-108.633	0.01	69	68	67	UNKNOWN	SEDIMENTARY	UNKNOWN	UNKNOWN	LIMESTONE																									2.2	600		5	10
D115584		USGS		Geochemistry of rock samples from the National Geochemical Database: U.S. Geological Survey, Reston, VA.	U.S. Geological Survey	USGS		38.8833	-104.883	0.01	69	69	69	MISC	SEDIMENTARY	UNKNOWN	UNKNOWN	LIMESTONE																		40.8
D115584		USGS		Geochemistry of rock samples from the National Geochemical Database: U.S. Geological Survey, Reston, VA.	U.S. Geological Survey	USGS		38.8833	-104.883	0.01	69	69	69	UNKNOWN	SEDIMENTARY	UNKNOWN	UNKNOWN	LIMESTONE		9.5	0.05	1.5		0.34		0.42		0.12	11.8	34.9			0.78	0.06									0.8	530			7
D115585		USGS		Geochemistry of rock samples from the National Geochemical Database: U.S. Geological Survey, Reston, VA.	U.S. Geological Survey	USGS		38.6333	-106.383	0.01	69	69	69	MISC	SEDIMENTARY	UNKNOWN	UNKNOWN	LIMESTONE																		46.5
D115585		USGS		Geochemistry of rock samples from the National Geochemical Database: U.S. Geological Survey, Reston, VA.	U.S. Geological Survey	USGS		38.6333	-106.383	0.01	69	69	69	UNKNOWN	SEDIMENTARY	UNKNOWN	UNKNOWN	LIMESTONE		1.2		0.1		0.65		0.14		0.1	20.8	30.8			0.06										0.13	190	2.9	1.4	1.3
D115586		USGS		Geochemistry of rock samples from the National Geochemical Database: U.S. Geological Survey, Reston, VA.	U.S. Geological Survey	USGS		38.5	-105.25	0.01	69	69	69	MISC	SEDIMENTARY	UNKNOWN	UNKNOWN	LIMESTONE																		46.1
D115586		USGS		Geochemistry of rock samples from the National Geochemical Database: U.S. Geological Survey, Reston, VA.	U.S. Geological Survey	USGS		38.5	-105.25	0.01	69	69	69	UNKNOWN	SEDIMENTARY	UNKNOWN	UNKNOWN	LIMESTONE		1		0.1		0.34		0.04		0.29	17.4	34.8		0.06	0.08										0.27	620	4.8	7.9	15		100
D115587		USGS		Geochemistry of rock samples from the National Geochemical Database: U.S. Geological Survey, Reston, VA.	U.S. Geological Survey	USGS		42.5	-108	0.01	67	67	67	MISC	SEDIMENTARY	UNKNOWN	UNKNOWN	LIMESTONE																		25.8
D115587		USGS		Geochemistry of rock samples from the National Geochemical Database: U.S. Geological Survey, Reston, VA.	U.S. Geological Survey	USGS		42.5	-108	0.01	67	67	67	UNKNOWN	SEDIMENTARY	UNKNOWN	UNKNOWN	LIMESTONE		36.2	0.07	3.2		1		0.1		0.1	0.2	28.5		3	1.7	0.08									0.51	270	3.7	2.6	2.4
D115588		USGS		Geochemistry of rock samples from the National Geochemical Database: U.S. Geological Survey, Reston, VA.	U.S. Geological Survey	USGS		31.5	-110.383	0.01	69	68	67	MISC	SEDIMENTARY	UNKNOWN	UNKNOWN	LIMESTONE																		17.4
D115588		USGS		Geochemistry of rock samples from the National Geochemical Database: U.S. Geological Survey, Reston, VA.	U.S. Geological Survey	USGS		31.5	-110.383	0.01	69	68	67	UNKNOWN	SEDIMENTARY	UNKNOWN	UNKNOWN	LIMESTONE		42.6	0.57	9.1		2.1		0.62		0.06	1.3	20.7		1.1	4.6	0.14									1.6	300	7.8	7.6	11		51
D115589		USGS		Geochemistry of rock samples from the National Geochemical Database: U.S. Geological Survey, Reston, VA.	U.S. Geological Survey	USGS		41.5	-111.883	0.01	67	67	67	MISC	SEDIMENTARY	UNKNOWN	UNKNOWN	LIMESTONE																		46.5
D115589		USGS		Geochemistry of rock samples from the National Geochemical Database: U.S. Geological Survey, Reston, VA.	U.S. Geological Survey	USGS		41.5	-111.883	0.01	67	67	67	UNKNOWN	SEDIMENTARY	UNKNOWN	UNKNOWN	LIMESTONE		1.8		0.1				0.02		0.03	20.6	30.4		0.85		0.02									0.054	67			1
D115591		USGS		Geochemistry of rock samples from the National Geochemical Database: U.S. Geological Survey, Reston, VA.	U.S. Geological Survey	USGS		33	-107.133	0.01	69	69	69	MISC	SEDIMENTARY	UNKNOWN	UNKNOWN	LIMESTONE																		32.8
D115591		USGS		Geochemistry of rock samples from the National Geochemical Database: U.S. Geological Survey, Reston, VA.	U.S. Geological Survey	USGS		33	-107.133	0.01	69	69	69	UNKNOWN	SEDIMENTARY	UNKNOWN	UNKNOWN	LIMESTONE		20.2	0.28	2.9		0.68		0.38		0.04	0.5	40.2		0.65	1.4	0.28									0.46	160	3.8	3	1.3		49
D115592		USGS		Geochemistry of rock samples from the National Geochemical Database: U.S. Geological Survey, Reston, VA.	U.S. Geological Survey	USGS		44.3833	-103.633	0.01	69	68	67	MISC	SEDIMENTARY	UNKNOWN	UNKNOWN	LIMESTONE																		21.6
D115592		USGS		Geochemistry of rock samples from the National Geochemical Database: U.S. Geological Survey, Reston, VA.	U.S. Geological Survey	USGS		44.3833	-103.633	0.01	69	68	67	UNKNOWN	SEDIMENTARY	UNKNOWN	UNKNOWN	LIMESTONE		38.9	0.34	5.9		2.3		0.6		0.26	1.4	23.4		0.75	2.3	0.46									1.3	710	7.9	7.4	3.7		50
D115593		USGS		Geochemistry of rock samples from the National Geochemical Database: U.S. Geological Survey, Reston, VA.	U.S. Geological Survey	USGS		39	-114.5	0.01	67	67	67	MISC	SEDIMENTARY	UNKNOWN	UNKNOWN	LIMESTONE																		43.4
D115593		USGS		Geochemistry of rock samples from the National Geochemical Database: U.S. Geological Survey, Reston, VA.	U.S. Geological Survey	USGS		39	-114.5	0.01	67	67	67	UNKNOWN	SEDIMENTARY	UNKNOWN	UNKNOWN	LIMESTONE		1.3	0.02	0.6		0.3		0.14			3.6	49.3		0.65	0.24	0.03									0.17	33	2.9	1.9	1.6
D115594		USGS		Geochemistry of rock samples from the National Geochemical Database: U.S. Geological Survey, Reston, VA.	U.S. Geological Survey	USGS		38.8833	-104.883	0.01	69	69	69	UNKNOWN	SEDIMENTARY	UNKNOWN	UNKNOWN	LIMESTONE		6.5	0.07	1.4		0.58		0.38		0.09	11.5	37.7		0.85	0.87	0.04									0.81	550			10
D115595		USGS		Geochemistry of rock samples from the National Geochemical Database: U.S. Geological Survey, Reston, VA.	U.S. Geological Survey	USGS		40.25	-111.5	0.01	67	67	67	MISC	SEDIMENTARY	UNKNOWN	UNKNOWN	LIMESTONE																		41.6
D115595		USGS		Geochemistry of rock samples from the National Geochemical Database: U.S. Geological Survey, Reston, VA.	U.S. Geological Survey	USGS		40.25	-111.5	0.01	67	67	67	UNKNOWN	SEDIMENTARY	UNKNOWN	UNKNOWN	LIMESTONE		2.4	0.06	1.4		0.5		0.14		0.01	2.1	49		0.2	0.57	0.04									0.29	150	2.5	3.7	2.5		86
D115597		USGS		Geochemistry of rock samples from the National Geochemical Database: U.S. Geological Survey, Reston, VA.	U.S. Geological Survey	USGS		37.25	-115.633	0.01	69	69	69	MISC	SEDIMENTARY	UNKNOWN	UNKNOWN	LIMESTONE																		32.9
D115597		USGS		Geochemistry of rock samples from the National Geochemical Database: U.S. Geological Survey, Reston, VA.	U.S. Geological Survey	USGS		37.25	-115.633	0.01	69	69	69	UNKNOWN	SEDIMENTARY	UNKNOWN	UNKNOWN	LIMESTONE		22.6	0.04	1.7		0.33		0.1		0.01	0.21	41.2		0.26	0.69	0.09									0.12	140		1.7	0.57		40
D115599		USGS		Geochemistry of rock samples from the National Geochemical Database: U.S. Geological Survey, Reston, VA.	U.S. Geological Survey	USGS		36.6333	-115.25	0.01	67	67	67	MISC	SEDIMENTARY	UNKNOWN	UNKNOWN	LIMESTONE																		45.2
D115599		USGS		Geochemistry of rock samples from the National Geochemical Database: U.S. Geological Survey, Reston, VA.	U.S. Geological Survey	USGS		36.6333	-115.25	0.01	67	67	67	UNKNOWN	SEDIMENTARY	UNKNOWN	UNKNOWN	LIMESTONE		0.94		0.32		0.12		0.06			11.5	41.8		0.02	0.27										0.059	25	4	1.4	0.69
D115600		USGS		Geochemistry of rock samples from the National Geochemical Database: U.S. Geological Survey, Reston, VA.	U.S. Geological Survey	USGS		33	-107.133	0.01	69	69	69	UNKNOWN	SEDIMENTARY	UNKNOWN	UNKNOWN	LIMESTONE		6.3	0.08	1.1		0.6		0.54		0.29	15.3	31.9		0.09	0.57	0.05									0.27	290
D115601		USGS		Geochemistry of rock samples from the National Geochemical Database: U.S. Geological Survey, Reston, VA.	U.S. Geological Survey	USGS		39.3833	-115.883	0.01	67	67	67	MISC	SEDIMENTARY	UNKNOWN	UNKNOWN	LIMESTONE																		43.5
D115601		USGS		Geochemistry of rock samples from the National Geochemical Database: U.S. Geological Survey, Reston, VA.	U.S. Geological Survey	USGS		39.3833	-115.883	0.01	67	67	67	UNKNOWN	SEDIMENTARY	UNKNOWN	UNKNOWN	LIMESTONE		2.2				0.21		0.04			1	52.8		0.02												61
D115602		USGS		Geochemistry of rock samples from the National Geochemical Database: U.S. Geological Survey, Reston, VA.	U.S. Geological Survey	USGS		44.1333	-103.383	0.01	69	68	67	MISC	SEDIMENTARY	UNKNOWN	UNKNOWN	LIMESTONE																		34.5
D115602		USGS		Geochemistry of rock samples from the National Geochemical Database: U.S. Geological Survey, Reston, VA.	U.S. Geological Survey	USGS		44.1333	-103.383	0.01	69	68	67	UNKNOWN	SEDIMENTARY	UNKNOWN	UNKNOWN	LIMESTONE		12.1	0.05	1.6		2.7		0.84		0.58	2.1	42.8		2.1	1.1	0.41									1.4	1400	4.8	5.9	7.2
D115603		USGS		Geochemistry of rock samples from the National Geochemical Database: U.S. Geological Survey, Reston, VA.	U.S. Geological Survey	USGS		38.8833	-104.883	0.01	69	69	69	MISC	SEDIMENTARY	UNKNOWN	UNKNOWN	LIMESTONE																		41.2
D115603		USGS		Geochemistry of rock samples from the National Geochemical Database: U.S. Geological Survey, Reston, VA.	U.S. Geological Survey	USGS		38.8833	-104.883	0.01	69	69	69	UNKNOWN	SEDIMENTARY	UNKNOWN	UNKNOWN	LIMESTONE		6.4	0.07	1.3		0.6		0.4		0.11	11.2	38.1		0.12	0.83	0.04									0.84	590			5
D115604		USGS		Geochemistry of rock samples from the National Geochemical Database: U.S. Geological Survey, Reston, VA.	U.S. Geological Survey	USGS		38.8833	-104.883	0.01	69	69	69	MISC	SEDIMENTARY	UNKNOWN	UNKNOWN	LIMESTONE																		41.1
D115604		USGS		Geochemistry of rock samples from the National Geochemical Database: U.S. Geological Survey, Reston, VA.	U.S. Geological Survey	USGS		38.8833	-104.883	0.01	69	69	69	UNKNOWN	SEDIMENTARY	UNKNOWN	UNKNOWN	LIMESTONE		6.5	0.07	1.5		0.6		0.4		0.11	11.7	37.5		0.12	0.86	0.04									0.75	510			7
D115605		USGS		Geochemistry of rock samples from the National Geochemical Database: U.S. Geological Survey, Reston, VA.	U.S. Geological Survey	USGS		31.3833	-110.25	0.01	69	68	67	MISC	SEDIMENTARY	UNKNOWN	UNKNOWN	LIMESTONE																		32
D115605		USGS		Geochemistry of rock samples from the National Geochemical Database: U.S. Geological Survey, Reston, VA.	U.S. Geological Survey	USGS		31.3833	-110.25	0.01	69	68	67	UNKNOWN	SEDIMENTARY	UNKNOWN	UNKNOWN	LIMESTONE		19.6	0.23	4.4		1		0.58		0.05	0.7	39.1		0.18	2	0.14									0.71	250	3.4	3.3	2.7
D115610		USGS		Geochemistry of rock samples from the National Geochemical Database: U.S. Geological Survey, Reston, VA.	U.S. Geological Survey	USGS		45.6333	-112.5	0.01	67	67	67	MISC	SEDIMENTARY	UNKNOWN	UNKNOWN	LIMESTONE																		45.5
D115610		USGS		Geochemistry of rock samples from the National Geochemical Database: U.S. Geological Survey, Reston, VA.	U.S. Geological Survey	USGS		45.6333	-112.5	0.01	67	67	67	UNKNOWN	SEDIMENTARY	UNKNOWN	UNKNOWN	LIMESTONE		0.7	0.03	0.2		1.3		2		0.18	20.1	30.7			0.23	0.07									1.4	290	9.4	4.7	11		48
D115611		USGS		Geochemistry of rock samples from the National Geochemical Database: U.S. Geological Survey, Reston, VA.	U.S. Geological Survey	USGS		36.8833	-115.25	0.01	67	67	67	MISC	SEDIMENTARY	UNKNOWN	UNKNOWN	LIMESTONE																		41.7
D115611		USGS		Geochemistry of rock samples from the National Geochemical Database: U.S. Geological Survey, Reston, VA.	U.S. Geological Survey	USGS		36.8833	-115.25	0.01	67	67	67	UNKNOWN	SEDIMENTARY	UNKNOWN	UNKNOWN	LIMESTONE		11.8	0.02	0.14				0.1			17.5	28.7			0.2										0.084	25		2.1	0.59		50
D115612		USGS		Geochemistry of rock samples from the National Geochemical Database: U.S. Geological Survey, Reston, VA.	U.S. Geological Survey	USGS		41.5	-111.883	0.01	67	67	67	MISC	SEDIMENTARY	UNKNOWN	UNKNOWN	LIMESTONE																		46.2
D115612		USGS		Geochemistry of rock samples from the National Geochemical Database: U.S. Geological Survey, Reston, VA.	U.S. Geological Survey	USGS		41.5	-111.883	0.01	67	67	67	UNKNOWN	SEDIMENTARY	UNKNOWN	UNKNOWN	LIMESTONE		0.88	0.02	0.27		0.27		0.14		0.13	18.7	32.6		0.08	0.04										0.21	190		2.6	1.5
D115613		USGS		Geochemistry of rock samples from the National Geochemical Database: U.S. Geological Survey, Reston, VA.	U.S. Geological Survey	USGS		42.6333	-108	0.01	67	67	67	MISC	SEDIMENTARY	UNKNOWN	UNKNOWN	LIMESTONE																		43
D115613		USGS		Geochemistry of rock samples from the National Geochemical Database: U.S. Geological Survey, Reston, VA.	U.S. Geological Survey	USGS		42.6333	-108	0.01	67	67	67	UNKNOWN	SEDIMENTARY	UNKNOWN	UNKNOWN	LIMESTONE		1.8	0.02	0.35		0.56		0.14		0.07	2	51.7		0.08	0.11	0.06									0.45	180	5.8		1.8		35
D115614		USGS		Geochemistry of rock samples from the National Geochemical Database: U.S. Geological Survey, Reston, VA.	U.S. Geological Survey	USGS		39.5	-107.383	0.01	67	67	67	MISC	SEDIMENTARY	UNKNOWN	UNKNOWN	LIMESTONE																		41.3
D115614		USGS		Geochemistry of rock samples from the National Geochemical Database: U.S. Geological Survey, Reston, VA.	U.S. Geological Survey	USGS		39.5	-107.383	0.01	67	67	67	UNKNOWN	SEDIMENTARY	UNKNOWN	UNKNOWN	LIMESTONE		2.3	0.04	1		0.34		0.1		0.01	1.2	50.9			0.65										0.19	140	4.4	2.6	1.5
D115615		USGS		Geochemistry of rock samples from the National Geochemical Database: U.S. Geological Survey, Reston, VA.	U.S. Geological Survey	USGS		38.8833	-104.883	0.01	69	69	69	MISC	SEDIMENTARY	UNKNOWN	UNKNOWN	LIMESTONE																		40.9
D115615		USGS		Geochemistry of rock samples from the National Geochemical Database: U.S. Geological Survey, Reston, VA.	U.S. Geological Survey	USGS		38.8833	-104.883	0.01	69	69	69	UNKNOWN	SEDIMENTARY	UNKNOWN	UNKNOWN	LIMESTONE		5.9	0.06	1		0.61		0.34		0.09	10.8	37.2			0.81	0.03									0.76	520			5
D115616		USGS		Geochemistry of rock samples from the National Geochemical Database: U.S. Geological Survey, Reston, VA.	U.S. Geological Survey	USGS		38.8833	-104.883	0.01	67	67	67	MISC	SEDIMENTARY	UNKNOWN	UNKNOWN	LIMESTONE																		40.9
D115616		USGS		Geochemistry of rock samples from the National Geochemical Database: U.S. Geological Survey, Reston, VA.	U.S. Geological Survey	USGS		38.8833	-104.883	0.01	67	67	67	UNKNOWN	SEDIMENTARY	UNKNOWN	UNKNOWN	LIMESTONE		6	0.07	1.4		0.6		0.36		0.1	11.8	35.6			0.81	0.03									0.72	490			5
D115617		USGS		Geochemistry of rock samples from the National Geochemical Database: U.S. Geological Survey, Reston, VA.	U.S. Geological Survey	USGS		38.8833	-104.883	0.01	67	67	67	MISC	SEDIMENTARY	UNKNOWN	UNKNOWN	LIMESTONE																		42.8
D115617		USGS		Geochemistry of rock samples from the National Geochemical Database: U.S. Geological Survey, Reston, VA.	U.S. Geological Survey	USGS		38.8833	-104.883	0.01	67	67	67	UNKNOWN	SEDIMENTARY	UNKNOWN	UNKNOWN	LIMESTONE		5.8	0.07	0.9		0.62		0.38		0.11	11	35.5			0.84	0.03									0.83	590			7
D115618		USGS		Geochemistry of rock samples from the National Geochemical Database: U.S. Geological Survey, Reston, VA.	U.S. Geological Survey	USGS		43	-112.133	0.01	69	68	67	MISC	SEDIMENTARY	UNKNOWN	UNKNOWN	LIMESTONE																		41.6
D115618		USGS		Geochemistry of rock samples from the National Geochemical Database: U.S. Geological Survey, Reston, VA.	U.S. Geological Survey	USGS		43	-112.133	0.01	69	68	67	UNKNOWN	SEDIMENTARY	UNKNOWN	UNKNOWN	LIMESTONE		2.5	0.08	1.3		0.61		0.14		0.01	3.1	48.5			0.64	0.02									0.46	210	4.5	2.9	1.7
D115619		USGS		Geochemistry of rock samples from the National Geochemical Database: U.S. Geological Survey, Reston, VA.	U.S. Geological Survey	USGS		42.6333	-108	0.01	67	67	67	MISC	SEDIMENTARY	UNKNOWN	UNKNOWN	LIMESTONE																		42.6
D115619		USGS		Geochemistry of rock samples from the National Geochemical Database: U.S. Geological Survey, Reston, VA.	U.S. Geological Survey	USGS		42.6333	-108	0.01	67	67	67	UNKNOWN	SEDIMENTARY	UNKNOWN	UNKNOWN	LIMESTONE		1.1	0.01	1.1		0.73		0.1		0.01	2.1	49.7			0.26	0.26									0.57	290		2.7	0.46
D115621		USGS		Geochemistry of rock samples from the National Geochemical Database: U.S. Geological Survey, Reston, VA.	U.S. Geological Survey	USGS		32.75	-107.883	0.01	69	69	69	MISC	SEDIMENTARY	UNKNOWN	UNKNOWN	LIMESTONE																		42.7
D115621		USGS		Geochemistry of rock samples from the National Geochemical Database: U.S. Geological Survey, Reston, VA.	U.S. Geological Survey	USGS		32.75	-107.883	0.01	69	69	69	UNKNOWN	SEDIMENTARY	UNKNOWN	UNKNOWN	LIMESTONE		8.6	0.03	0.5		0.33		0.22		0.22	18.6	27.5		2	0.21										0.41	600	2.5	2	0.63		290
D115622		USGS		Geochemistry of rock samples from the National Geochemical Database: U.S. Geological Survey, Reston, VA.	U.S. Geological Survey	USGS		36	-112	0.01	67	67	67	MISC	SEDIMENTARY	UNKNOWN	UNKNOWN	LIMESTONE																		35.5
D115622		USGS		Geochemistry of rock samples from the National Geochemical Database: U.S. Geological Survey, Reston, VA.	U.S. Geological Survey	USGS		36	-112	0.01	67	67	67	UNKNOWN	SEDIMENTARY	UNKNOWN	UNKNOWN	LIMESTONE		16.2	0.23	3.7		1.9		3.5		0.58	11.7	23.1			1.4	0.02									1.7	1500	4.8	3.7	1.4
D115624		USGS		Geochemistry of rock samples from the National Geochemical Database: U.S. Geological Survey, Reston, VA.	U.S. Geological Survey	USGS		38.8833	-104.883	0.01	69	69	69	MISC	SEDIMENTARY	UNKNOWN	UNKNOWN	LIMESTONE																		40.9
D115624		USGS		Geochemistry of rock samples from the National Geochemical Database: U.S. Geological Survey, Reston, VA.	U.S. Geological Survey	USGS		38.8833	-104.883	0.01	69	69	69	UNKNOWN	SEDIMENTARY	UNKNOWN	UNKNOWN	LIMESTONE		6.7	0.03	1.2		0.35		0.36		0.09	12.2	34.3		2.3	0.78	0.02									0.85	540			7
D115625		USGS		Geochemistry of rock samples from the National Geochemical Database: U.S. Geological Survey, Reston, VA.	U.S. Geological Survey	USGS		39.3833	-116	0.01	67	67	67	MISC	SEDIMENTARY	UNKNOWN	UNKNOWN	LIMESTONE																		42.6
D115625		USGS		Geochemistry of rock samples from the National Geochemical Database: U.S. Geological Survey, Reston, VA.	U.S. Geological Survey	USGS		39.3833	-116	0.01	67	67	67	UNKNOWN	SEDIMENTARY	UNKNOWN	UNKNOWN	LIMESTONE		0.38	0.03	0.26		0.16		0.04		0.1	0.82	53		2	0.05	0.06									0.073	280			1.3		68
D115626		USGS		Geochemistry of rock samples from the National Geochemical Database: U.S. Geological Survey, Reston, VA.	U.S. Geological Survey	USGS		42.5	-107.883	0.01	67	67	67	MISC	SEDIMENTARY	UNKNOWN	UNKNOWN	LIMESTONE																		29.5
D115626		USGS		Geochemistry of rock samples from the National Geochemical Database: U.S. Geological Survey, Reston, VA.	U.S. Geological Survey	USGS		42.5	-107.883	0.01	67	67	67	UNKNOWN	SEDIMENTARY	UNKNOWN	UNKNOWN	LIMESTONE		25.4	0.11	3.7		1.4		0.2		0.14	0.1	36.2		2.2	2.1	0.31									0.99	520	2.6	3.7	2.2
D115627		USGS		Geochemistry of rock samples from the National Geochemical Database: U.S. Geological Survey, Reston, VA.	U.S. Geological Survey	USGS		38.5	-105.133	0.01	69	69	69	MISC	SEDIMENTARY	UNKNOWN	UNKNOWN	LIMESTONE																		44.4
D115627		USGS		Geochemistry of rock samples from the National Geochemical Database: U.S. Geological Survey, Reston, VA.	U.S. Geological Survey	USGS		38.5	-105.133	0.01	69	69	69	UNKNOWN	SEDIMENTARY	UNKNOWN	UNKNOWN	LIMESTONE		2.9	0.02	0.83		0.76		0.34		0.29	21	30.3		0.1	0.22										0.52	470	2.7	7.8	2.6		50
D115628		USGS		Geochemistry of rock samples from the National Geochemical Database: U.S. Geological Survey, Reston, VA.	U.S. Geological Survey	USGS		32.3833	-109.133	0.01	69	69	69	MISC	SEDIMENTARY	UNKNOWN	UNKNOWN	LIMESTONE																		33.1
D115628		USGS		Geochemistry of rock samples from the National Geochemical Database: U.S. Geological Survey, Reston, VA.	U.S. Geological Survey	USGS		32.3833	-109.133	0.01	69	69	69	UNKNOWN	SEDIMENTARY	UNKNOWN	UNKNOWN	LIMESTONE		19.6	0.1	3		0.62		0.58		0.02	5	38.7		2.6	0.99	0.04									0.65	150	5.4	3.9	1.5
D115629		USGS		Geochemistry of rock samples from the National Geochemical Database: U.S. Geological Survey, Reston, VA.	U.S. Geological Survey	USGS		38.8833	-104.883	0.01	69	69	69	MISC	SEDIMENTARY	UNKNOWN	UNKNOWN	LIMESTONE																		40.8
D115629		USGS		Geochemistry of rock samples from the National Geochemical Database: U.S. Geological Survey, Reston, VA.	U.S. Geological Survey	USGS		38.8833	-104.883	0.01	69	69	69	UNKNOWN	SEDIMENTARY	UNKNOWN	UNKNOWN	LIMESTONE		7.2	0.07	1.6		0.62		0.35		0.09	11.5	37.1		0.12	0.91	0.02									0.74	500			7
D115630		USGS		Geochemistry of rock samples from the National Geochemical Database: U.S. Geological Survey, Reston, VA.	U.S. Geological Survey	USGS		42.5	-108	0.01	67	67	67	MISC	SEDIMENTARY	UNKNOWN	UNKNOWN	LIMESTONE																		29.2
D115633		USGS		Geochemistry of rock samples from the National Geochemical Database: U.S. Geological Survey, Reston, VA.	U.S. Geological Survey	USGS		39.1333	-114.5	0.01	67	67	67	MISC	SEDIMENTARY	UNKNOWN	UNKNOWN	LIMESTONE																		43.2
D115630		USGS		Geochemistry of rock samples from the National Geochemical Database: U.S. Geological Survey, Reston, VA.	U.S. Geological Survey	USGS		42.5	-108	0.01	67	67	67	UNKNOWN	SEDIMENTARY	UNKNOWN	UNKNOWN	LIMESTONE		29.9	0.07	2.2		1.5		0.04		0.11	0.4	36		0.06	1.1	0.02									1	290	13	14	27		89
D115632		USGS		Geochemistry of rock samples from the National Geochemical Database: U.S. Geological Survey, Reston, VA.	U.S. Geological Survey	USGS		45.75	-111.75	0.01	67	67	67	MISC	SEDIMENTARY	UNKNOWN	UNKNOWN	LIMESTONE																		43.3
D115632		USGS		Geochemistry of rock samples from the National Geochemical Database: U.S. Geological Survey, Reston, VA.	U.S. Geological Survey	USGS		45.75	-111.75	0.01	67	67	67	UNKNOWN	SEDIMENTARY	UNKNOWN	UNKNOWN	LIMESTONE		3.2		0.08		0.19		0.1			0.58	52.3			0.06										0.056	77	2.1		1.5
D115633		USGS		Geochemistry of rock samples from the National Geochemical Database: U.S. Geological Survey, Reston, VA.	U.S. Geological Survey	USGS		39.1333	-114.5	0.01	67	67	67	UNKNOWN	SEDIMENTARY	UNKNOWN	UNKNOWN	LIMESTONE		3.2		0.08		0.2		0.06			0.56	53.9			0.09											17		2.2			50
D115634		USGS		Geochemistry of rock samples from the National Geochemical Database: U.S. Geological Survey, Reston, VA.	U.S. Geological Survey	USGS		38.8833	-104.883	0.01	69	69	69	MISC	SEDIMENTARY	UNKNOWN	UNKNOWN	LIMESTONE																		40.2
D115634		USGS		Geochemistry of rock samples from the National Geochemical Database: U.S. Geological Survey, Reston, VA.	U.S. Geological Survey	USGS		38.8833	-104.883	0.01	69	69	69	UNKNOWN	SEDIMENTARY	UNKNOWN	UNKNOWN	LIMESTONE		6.4	0.06	1.5		0.5		0.42		0.09	11.6	35.7		0.27	0.9	0.02									0.69	470			5
D115635		USGS		Geochemistry of rock samples from the National Geochemical Database: U.S. Geological Survey, Reston, VA.	U.S. Geological Survey	USGS		38.8833	-104.883	0.01	69	69	69	MISC	SEDIMENTARY	UNKNOWN	UNKNOWN	LIMESTONE																		40.8
D115635		USGS		Geochemistry of rock samples from the National Geochemical Database: U.S. Geological Survey, Reston, VA.	U.S. Geological Survey	USGS		38.8833	-104.883	0.01	69	69	69	UNKNOWN	SEDIMENTARY	UNKNOWN	UNKNOWN	LIMESTONE		6.8	0.07	1.4		0.48		0.42		0.09	11.6	36.1		0.12	0.87										0.74	500			5
D115636		USGS		Geochemistry of rock samples from the National Geochemical Database: U.S. Geological Survey, Reston, VA.	U.S. Geological Survey	USGS		38.8833	-104.883	0.01	69	69	69	MISC	SEDIMENTARY	UNKNOWN	UNKNOWN	LIMESTONE																		40.9
D115636		USGS		Geochemistry of rock samples from the National Geochemical Database: U.S. Geological Survey, Reston, VA.	U.S. Geological Survey	USGS		38.8833	-104.883	0.01	69	69	69	UNKNOWN	SEDIMENTARY	UNKNOWN	UNKNOWN	LIMESTONE		7	0.07	1.1		0.5		0.42		0.1	12	35.5		2.7	0.9	0.03									0.72	480			5
D115637		USGS		Geochemistry of rock samples from the National Geochemical Database: U.S. Geological Survey, Reston, VA.	U.S. Geological Survey	USGS		38.8833	-104.883	0.01	69	69	69	MISC	SEDIMENTARY	UNKNOWN	UNKNOWN	LIMESTONE																		41.1
D115637		USGS		Geochemistry of rock samples from the National Geochemical Database: U.S. Geological Survey, Reston, VA.	U.S. Geological Survey	USGS		38.8833	-104.883	0.01	69	69	69	UNKNOWN	SEDIMENTARY	UNKNOWN	UNKNOWN	LIMESTONE		7	0.07	1.2		0.55		0.4		0.11	11.8	35.4		2.2	0.88	0.02									0.71	490			15
D115638		USGS		Geochemistry of rock samples from the National Geochemical Database: U.S. Geological Survey, Reston, VA.	U.S. Geological Survey	USGS		44.25	-103.75	0.01	69	68	67	MISC	SEDIMENTARY	UNKNOWN	UNKNOWN	LIMESTONE																		22.4
D115638		USGS		Geochemistry of rock samples from the National Geochemical Database: U.S. Geological Survey, Reston, VA.	U.S. Geological Survey	USGS		44.25	-103.75	0.01	69	68	67	UNKNOWN	SEDIMENTARY	UNKNOWN	UNKNOWN	LIMESTONE		38.6	0.21	4.9		2.3		0.2		0.25	0.1	26.4		0.12	2.4	0.38									1.3	680	10	9.6	2.7		70
D115639		USGS		Geochemistry of rock samples from the National Geochemical Database: U.S. Geological Survey, Reston, VA.	U.S. Geological Survey	USGS		32.3833	-109.133	0.01	69	69	69	MISC	SEDIMENTARY	UNKNOWN	UNKNOWN	LIMESTONE																		40.8
D115639		USGS		Geochemistry of rock samples from the National Geochemical Database: U.S. Geological Survey, Reston, VA.	U.S. Geological Survey	USGS		32.3833	-109.133	0.01	69	69	69	UNKNOWN	SEDIMENTARY	UNKNOWN	UNKNOWN	LIMESTONE		4.3	0.01	0.3		0.27		0.18		0.01	7.1	45.2		2.2	0.21	0.1									0.21	200	2.8
D115641		USGS		Geochemistry of rock samples from the National Geochemical Database: U.S. Geological Survey, Reston, VA.	U.S. Geological Survey	USGS		38.8833	-104.883	0.01	69	69	69	MISC	SEDIMENTARY	UNKNOWN	UNKNOWN	LIMESTONE																		40.7
D115641		USGS		Geochemistry of rock samples from the National Geochemical Database: U.S. Geological Survey, Reston, VA.	U.S. Geological Survey	USGS		38.8833	-104.883	0.01	69	69	69	UNKNOWN	SEDIMENTARY	UNKNOWN	UNKNOWN	LIMESTONE		6.3	0.06	1.3		0.44		0.4		0.08	12.2	35.4			0.89	0.02									0.75	460			5
D115643		USGS		Geochemistry of rock samples from the National Geochemical Database: U.S. Geological Survey, Reston, VA.	U.S. Geological Survey	USGS		44.25	-103.75	0.01	69	68	67	MISC	SEDIMENTARY	UNKNOWN	UNKNOWN	LIMESTONE																		21.7
D115643		USGS		Geochemistry of rock samples from the National Geochemical Database: U.S. Geological Survey, Reston, VA.	U.S. Geological Survey	USGS		44.25	-103.75	0.01	69	68	67	UNKNOWN	SEDIMENTARY	UNKNOWN	UNKNOWN	LIMESTONE		38.9	0.21	4.9		2.3		0.22		0.25	0.1	26.7			2.3	0.41									1.3	710	12	8.4	3.3
D115644		USGS		Geochemistry of rock samples from the National Geochemical Database: U.S. Geological Survey, Reston, VA.	U.S. Geological Survey	USGS		32.8833	-110.633	0.01	69	68	67	MISC	SEDIMENTARY	UNKNOWN	UNKNOWN	LIMESTONE																		37.9
D115644		USGS		Geochemistry of rock samples from the National Geochemical Database: U.S. Geological Survey, Reston, VA.	U.S. Geological Survey	USGS		32.8833	-110.633	0.01	69	68	67	UNKNOWN	SEDIMENTARY	UNKNOWN	UNKNOWN	LIMESTONE		11	0.03	1		1.1		0.08		0.09	2.2	47.8			0.34	0.03									0.62	460	3.6	4	0.74
D115645		USGS		Geochemistry of rock samples from the National Geochemical Database: U.S. Geological Survey, Reston, VA.	U.S. Geological Survey	USGS		34.5	-115.383	0.01	67	67	67	MISC	SEDIMENTARY	UNKNOWN	UNKNOWN	LIMESTONE																		40.2
D115645		USGS		Geochemistry of rock samples from the National Geochemical Database: U.S. Geological Survey, Reston, VA.	U.S. Geological Survey	USGS		34.5	-115.383	0.01	67	67	67	UNKNOWN	SEDIMENTARY	UNKNOWN	UNKNOWN	LIMESTONE		3.6	0.05	1.8		0.51		0.14		0.01	1.7	49.1			0.56	0.13									0.32	300	3.2	3.2	1.2		150
D115646		USGS		Geochemistry of rock samples from the National Geochemical Database: U.S. Geological Survey, Reston, VA.	U.S. Geological Survey	USGS		47.8833	-108.5	0.01	69	68	67	MISC	SEDIMENTARY	UNKNOWN	UNKNOWN	LIMESTONE																		13.7
D115646		USGS		Geochemistry of rock samples from the National Geochemical Database: U.S. Geological Survey, Reston, VA.	U.S. Geological Survey	USGS		47.8833	-108.5	0.01	69	68	67	UNKNOWN	SEDIMENTARY	UNKNOWN	UNKNOWN	LIMESTONE		55.5	0.2	7.2		1.3		0.46		0.11	0.7	16.4		0.23	4.1	0.21									1.5	400			2
D115647		USGS		Geochemistry of rock samples from the National Geochemical Database: U.S. Geological Survey, Reston, VA.	U.S. Geological Survey	USGS		33	-107.133	0.01	69	69	69	MISC	SEDIMENTARY	UNKNOWN	UNKNOWN	LIMESTONE																		44.2
D115647		USGS		Geochemistry of rock samples from the National Geochemical Database: U.S. Geological Survey, Reston, VA.	U.S. Geological Survey	USGS		33	-107.133	0.01	69	69	69	UNKNOWN	SEDIMENTARY	UNKNOWN	UNKNOWN	LIMESTONE		4.1	0.03	0.7		0.3		0.36		0.11	17.3	30.7		0.12	0.26	0.05									0.37	310			0.93		83
D115648		USGS		Geochemistry of rock samples from the National Geochemical Database: U.S. Geological Survey, Reston, VA.	U.S. Geological Survey	USGS		36	-112	0.01	67	67	67	MISC	SEDIMENTARY	UNKNOWN	UNKNOWN	LIMESTONE																		40.4
D115648		USGS		Geochemistry of rock samples from the National Geochemical Database: U.S. Geological Survey, Reston, VA.	U.S. Geological Survey	USGS		36	-112	0.01	67	67	67	UNKNOWN	SEDIMENTARY	UNKNOWN	UNKNOWN	LIMESTONE		3.6	0.07	1.5		0.63		0.22		0.09	1.2	49.2		0.06	0.76	0.01									0.45	440	3.1	3.7	1.4		110
D115649		USGS		Geochemistry of rock samples from the National Geochemical Database: U.S. Geological Survey, Reston, VA.	U.S. Geological Survey	USGS		39.5	-107.383	0.01	67	67	67	MISC	SEDIMENTARY	UNKNOWN	UNKNOWN	LIMESTONE																		39.6
D115649		USGS		Geochemistry of rock samples from the National Geochemical Database: U.S. Geological Survey, Reston, VA.	U.S. Geological Survey	USGS		39.5	-107.383	0.01	67	67	67	UNKNOWN	SEDIMENTARY	UNKNOWN	UNKNOWN	LIMESTONE		7.9	0.09	2.5		0.6		0.3		0.02	5.5	40.8		1.1	1.2	0.02									0.44	150	4.8	3	1.3
D115650		USGS		Geochemistry of rock samples from the National Geochemical Database: U.S. Geological Survey, Reston, VA.	U.S. Geological Survey	USGS		38.8833	-104.883	0.01	69	69	69	MISC	SEDIMENTARY	UNKNOWN	UNKNOWN	LIMESTONE																		40.6
D115650		USGS		Geochemistry of rock samples from the National Geochemical Database: U.S. Geological Survey, Reston, VA.	U.S. Geological Survey	USGS		38.8833	-104.883	0.01	69	69	69	UNKNOWN	SEDIMENTARY	UNKNOWN	UNKNOWN	LIMESTONE		7.8	0.07	1.4		0.68		0.42		0.09	11.1	35.1		0.25	0.82	0.06									0.72	520			5
D115651		USGS		Geochemistry of rock samples from the National Geochemical Database: U.S. Geological Survey, Reston, VA.	U.S. Geological Survey	USGS		32.8833	-107.25	0.01	69	69	69	MISC	SEDIMENTARY	UNKNOWN	UNKNOWN	LIMESTONE																		33.2
D115651		USGS		Geochemistry of rock samples from the National Geochemical Database: U.S. Geological Survey, Reston, VA.	U.S. Geological Survey	USGS		32.8833	-107.25	0.01	69	69	69	UNKNOWN	SEDIMENTARY	UNKNOWN	UNKNOWN	LIMESTONE		16.7	0.14	1.8		0.9		0.2		0.02	0.4	43.2		0.12	0.98	1.5									0.51	250			0.75
D115653		USGS		Geochemistry of rock samples from the National Geochemical Database: U.S. Geological Survey, Reston, VA.	U.S. Geological Survey	USGS		41.5	-111.883	0.01	67	67	67	MISC	SEDIMENTARY	UNKNOWN	UNKNOWN	LIMESTONE																		46
D115656		USGS		Geochemistry of rock samples from the National Geochemical Database: U.S. Geological Survey, Reston, VA.	U.S. Geological Survey	USGS		43.3833	-107.883	0.01	67	67	67	MISC	SEDIMENTARY	UNKNOWN	UNKNOWN	LIMESTONE																		35.7
D115653		USGS		Geochemistry of rock samples from the National Geochemical Database: U.S. Geological Survey, Reston, VA.	U.S. Geological Survey	USGS		41.5	-111.883	0.01	67	67	67	UNKNOWN	SEDIMENTARY	UNKNOWN	UNKNOWN	LIMESTONE		0.73	0.03	0.29		0.3		0.14		0.09	19.2	32.3		0.09	0.06										0.25	230		1.7	1.1		68
D115654		USGS		Geochemistry of rock samples from the National Geochemical Database: U.S. Geological Survey, Reston, VA.	U.S. Geological Survey	USGS		34.8833	-112.883	0.01	67	67	67	MISC	SEDIMENTARY	UNKNOWN	UNKNOWN	LIMESTONE																		36.8
D115654		USGS		Geochemistry of rock samples from the National Geochemical Database: U.S. Geological Survey, Reston, VA.	U.S. Geological Survey	USGS		34.8833	-112.883	0.01	67	67	67	UNKNOWN	SEDIMENTARY	UNKNOWN	UNKNOWN	LIMESTONE		14.9	0.28	4.1		2.9		2.9		0.22	13.6	20.4		0.06	1.4	0.06									1.8	1100	5.8	6.9	4.3		49
D115655		USGS		Geochemistry of rock samples from the National Geochemical Database: U.S. Geological Survey, Reston, VA.	U.S. Geological Survey	USGS		39	-114.5	0.01	67	67	67	MISC	SEDIMENTARY	UNKNOWN	UNKNOWN	LIMESTONE																		35.6
D115655		USGS		Geochemistry of rock samples from the National Geochemical Database: U.S. Geological Survey, Reston, VA.	U.S. Geological Survey	USGS		39	-114.5	0.01	67	67	67	UNKNOWN	SEDIMENTARY	UNKNOWN	UNKNOWN	LIMESTONE		14.2	0.16	4.1		1.3		0.58		0.03	3	38.7		1.6	0.77	0.04									0.98	160	8.3	5.2	4.7
D115656		USGS		Geochemistry of rock samples from the National Geochemical Database: U.S. Geological Survey, Reston, VA.	U.S. Geological Survey	USGS		43.3833	-107.883	0.01	67	67	67	UNKNOWN	SEDIMENTARY	UNKNOWN	UNKNOWN	LIMESTONE		15.7	0.07	1.3		0.56		0.14		0.03	0.5	46		0.12	0.86	0.04									0.37	300		2.9	2.1		33
D115657		USGS		Geochemistry of rock samples from the National Geochemical Database: U.S. Geological Survey, Reston, VA.	U.S. Geological Survey	USGS		45.8833	-111.25	0.01	67	67	67	MISC	SEDIMENTARY	UNKNOWN	UNKNOWN	LIMESTONE																		43.1
D115657		USGS		Geochemistry of rock samples from the National Geochemical Database: U.S. Geological Survey, Reston, VA.	U.S. Geological Survey	USGS		45.8833	-111.25	0.01	67	67	67	UNKNOWN	SEDIMENTARY	UNKNOWN	UNKNOWN	LIMESTONE		3.7	0.03	0.37		0.44		0.1			0.7	52		0.56	0.81	0.05									0.29	190	5.9		2.1		170
D115658		USGS		Geochemistry of rock samples from the National Geochemical Database: U.S. Geological Survey, Reston, VA.	U.S. Geological Survey	USGS		38.8833	-104.883	0.01	69	69	69	MISC	SEDIMENTARY	UNKNOWN	UNKNOWN	LIMESTONE																		40.9
D115658		USGS		Geochemistry of rock samples from the National Geochemical Database: U.S. Geological Survey, Reston, VA.	U.S. Geological Survey	USGS		38.8833	-104.883	0.01	69	69	69	UNKNOWN	SEDIMENTARY	UNKNOWN	UNKNOWN	LIMESTONE		6.5	0.07	1.4		0.62		0.38		0.1	11.4	37.4			0.88	0.06									0.77	490			5
D115716		USGS		Geochemistry of rock samples from the National Geochemical Database: U.S. Geological Survey, Reston, VA.	U.S. Geological Survey	USGS		44.5	-107	0.01	67	67	67	MISC	SEDIMENTARY	UNKNOWN	UNKNOWN	LIMESTONE																		27.6
D115659		USGS		Geochemistry of rock samples from the National Geochemical Database: U.S. Geological Survey, Reston, VA.	U.S. Geological Survey	USGS		34.8833	-112.883	0.01	67	67	67	UNKNOWN	SEDIMENTARY	UNKNOWN	UNKNOWN	LIMESTONE																									5	1500	30	10	5
D115660		USGS		Geochemistry of rock samples from the National Geochemical Database: U.S. Geological Survey, Reston, VA.	U.S. Geological Survey	USGS		40.25	-111.5	0.01	67	67	67	MISC	SEDIMENTARY	UNKNOWN	UNKNOWN	LIMESTONE																		46.5
D115660		USGS		Geochemistry of rock samples from the National Geochemical Database: U.S. Geological Survey, Reston, VA.	U.S. Geological Survey	USGS		40.25	-111.5	0.01	67	67	67	UNKNOWN	SEDIMENTARY	UNKNOWN	UNKNOWN	LIMESTONE		0.6	0.02	1.2		0.16		0.06		0.09	21.3	31.2			0.13										0.16	200		1.6
D115662		USGS		Geochemistry of rock samples from the National Geochemical Database: U.S. Geological Survey, Reston, VA.	U.S. Geological Survey	USGS		45.75	-111.633	0.01	67	67	67	MISC	SEDIMENTARY	UNKNOWN	UNKNOWN	LIMESTONE																		43.7
D115662		USGS		Geochemistry of rock samples from the National Geochemical Database: U.S. Geological Survey, Reston, VA.	U.S. Geological Survey	USGS		45.75	-111.633	0.01	67	67	67	UNKNOWN	SEDIMENTARY	UNKNOWN	UNKNOWN	LIMESTONE		0.6	0.01	0.3		0.29		0.06		0.01	5.3	49.9			0.14										0.078	210	4.5		0.75
D115664		USGS		Geochemistry of rock samples from the National Geochemical Database: U.S. Geological Survey, Reston, VA.	U.S. Geological Survey	USGS		47.25	-112.5	0.01	67	67	67	MISC	SEDIMENTARY	UNKNOWN	UNKNOWN	LIMESTONE																		39.9
D115664		USGS		Geochemistry of rock samples from the National Geochemical Database: U.S. Geological Survey, Reston, VA.	U.S. Geological Survey	USGS		47.25	-112.5	0.01	67	67	67	UNKNOWN	SEDIMENTARY	UNKNOWN	UNKNOWN	LIMESTONE		5.1	0.1	2.1		0.68		0.32		0.05	2.2	47.9			0.62	0.04									0.97	430	6.8	4.5	19
D115665		USGS		Geochemistry of rock samples from the National Geochemical Database: U.S. Geological Survey, Reston, VA.	U.S. Geological Survey	USGS		38.8833	-104.883	0.01	67	67	67	MISC	SEDIMENTARY	UNKNOWN	UNKNOWN	LIMESTONE																		40.9
D115665		USGS		Geochemistry of rock samples from the National Geochemical Database: U.S. Geological Survey, Reston, VA.	U.S. Geological Survey	USGS		38.8833	-104.883	0.01	67	67	67	UNKNOWN	SEDIMENTARY	UNKNOWN	UNKNOWN	LIMESTONE		6.5	0.09	2		0.58		0.42		0.11	11	36.3			0.87	0.05									0.8	500			5
D115666		USGS		Geochemistry of rock samples from the National Geochemical Database: U.S. Geological Survey, Reston, VA.	U.S. Geological Survey	USGS		38.8833	-104.883	0.01	69	69	69	MISC	SEDIMENTARY	UNKNOWN	UNKNOWN	LIMESTONE																		40.8
D115666		USGS		Geochemistry of rock samples from the National Geochemical Database: U.S. Geological Survey, Reston, VA.	U.S. Geological Survey	USGS		38.8833	-104.883	0.01	69	69	69	UNKNOWN	SEDIMENTARY	UNKNOWN	UNKNOWN	LIMESTONE		6.6	0.07	1.3		0.58		0.42		0.12	11.4	35.7			0.87	0.05									0.76	500			5
D115667		USGS		Geochemistry of rock samples from the National Geochemical Database: U.S. Geological Survey, Reston, VA.	U.S. Geological Survey	USGS		38.5	-105.25	0.01	69	69	69	MISC	SEDIMENTARY	UNKNOWN	UNKNOWN	LIMESTONE																		44.2
D115667		USGS		Geochemistry of rock samples from the National Geochemical Database: U.S. Geological Survey, Reston, VA.	U.S. Geological Survey	USGS		38.5	-105.25	0.01	69	69	69	UNKNOWN	SEDIMENTARY	UNKNOWN	UNKNOWN	LIMESTONE		8	0.06	0.96		0.46		0.26		0.12	11.6	31.8		1	0.4	0.02									0.4	460	9.4	4.8	5.8		76
D115668		USGS		Geochemistry of rock samples from the National Geochemical Database: U.S. Geological Survey, Reston, VA.	U.S. Geological Survey	USGS		38.8833	-104.883	0.01	69	69	69	MISC	SEDIMENTARY	UNKNOWN	UNKNOWN	LIMESTONE																		40.9
D115668		USGS		Geochemistry of rock samples from the National Geochemical Database: U.S. Geological Survey, Reston, VA.	U.S. Geological Survey	USGS		38.8833	-104.883	0.01	69	69	69	UNKNOWN	SEDIMENTARY	UNKNOWN	UNKNOWN	LIMESTONE		6.2	0.07	0.9		0.62		0.38		0.12	11	35.1		1.6	0.84	0.05									0.78	510			3
D115719		USGS		Geochemistry of rock samples from the National Geochemical Database: U.S. Geological Survey, Reston, VA.	U.S. Geological Survey	USGS		43	-112.133	0.01	69	68	67	MISC	SEDIMENTARY	UNKNOWN	UNKNOWN	LIMESTONE																		40.8
D115671		USGS		Geochemistry of rock samples from the National Geochemical Database: U.S. Geological Survey, Reston, VA.	U.S. Geological Survey	USGS		44.1333	-103.383	0.01	69	68	67	UNKNOWN	SEDIMENTARY	UNKNOWN	UNKNOWN	LIMESTONE																									3.5	900		7	5
D115672		USGS		Geochemistry of rock samples from the National Geochemical Database: U.S. Geological Survey, Reston, VA.	U.S. Geological Survey	USGS		37.25	-115.633	0.01	67	67	67	MISC	SEDIMENTARY	UNKNOWN	UNKNOWN	LIMESTONE																		40.4
D115672		USGS		Geochemistry of rock samples from the National Geochemical Database: U.S. Geological Survey, Reston, VA.	U.S. Geological Survey	USGS		37.25	-115.633	0.01	67	67	67	UNKNOWN	SEDIMENTARY	UNKNOWN	UNKNOWN	LIMESTONE		4.6	0.06	2.5		0.98		0.22		0.01	1.1	48.4		0.69	0.62	0.08									0.64	300	4.7	3.1	1.5
D115673		USGS		Geochemistry of rock samples from the National Geochemical Database: U.S. Geological Survey, Reston, VA.	U.S. Geological Survey	USGS		39.8833	-113.883	0.01	67	67	67	MISC	SEDIMENTARY	UNKNOWN	UNKNOWN	LIMESTONE																		43.2
D115673		USGS		Geochemistry of rock samples from the National Geochemical Database: U.S. Geological Survey, Reston, VA.	U.S. Geological Survey	USGS		39.8833	-113.883	0.01	67	67	67	UNKNOWN	SEDIMENTARY	UNKNOWN	UNKNOWN	LIMESTONE		1.2	0.04	0.7		0.31		0.06		0.01	3.1	49.3		0.75	0.32	0.01									0.084	8.5	2.5		1.1
D115674		USGS		Geochemistry of rock samples from the National Geochemical Database: U.S. Geological Survey, Reston, VA.	U.S. Geological Survey	USGS		39.5	-107.383	0.01	67	67	67	MISC	SEDIMENTARY	UNKNOWN	UNKNOWN	LIMESTONE																		39.8
D115674		USGS		Geochemistry of rock samples from the National Geochemical Database: U.S. Geological Survey, Reston, VA.	U.S. Geological Survey	USGS		39.5	-107.383	0.01	67	67	67	UNKNOWN	SEDIMENTARY	UNKNOWN	UNKNOWN	LIMESTONE		7.1	0.1	2.1		0.65		0.3		0.03	5.7	42.5		0.75	1.2	0.02									0.37	150	3.6	2	1.1
D115675		USGS		Geochemistry of rock samples from the National Geochemical Database: U.S. Geological Survey, Reston, VA.	U.S. Geological Survey	USGS		34.8833	-112.883	0.01	67	67	67	UNKNOWN	SEDIMENTARY	UNKNOWN	UNKNOWN	LIMESTONE																									4.8	1700		10	5
D115676		USGS		Geochemistry of rock samples from the National Geochemical Database: U.S. Geological Survey, Reston, VA.	U.S. Geological Survey	USGS		38.8833	-104.883	0.01	69	69	69	MISC	SEDIMENTARY	UNKNOWN	UNKNOWN	LIMESTONE																		41
D115676		USGS		Geochemistry of rock samples from the National Geochemical Database: U.S. Geological Survey, Reston, VA.	U.S. Geological Survey	USGS		38.8833	-104.883	0.01	69	69	69	UNKNOWN	SEDIMENTARY	UNKNOWN	UNKNOWN	LIMESTONE		6.9	0.07	1.3		0.6		0.4		0.12	10.7	35.5		0.25	0.84	0.04									0.68	440			20
D115677		USGS		Geochemistry of rock samples from the National Geochemical Database: U.S. Geological Survey, Reston, VA.	U.S. Geological Survey	USGS		39.5	-107.383	0.01	67	67	67	MISC	SEDIMENTARY	UNKNOWN	UNKNOWN	LIMESTONE																		41.5
D115695		USGS		Geochemistry of rock samples from the National Geochemical Database: U.S. Geological Survey, Reston, VA.	U.S. Geological Survey	USGS		32.3833	-109.133	0.01	69	69	69	UNKNOWN	SEDIMENTARY	UNKNOWN	UNKNOWN	LIMESTONE																									1.1	310			0.5
D115677		USGS		Geochemistry of rock samples from the National Geochemical Database: U.S. Geological Survey, Reston, VA.	U.S. Geological Survey	USGS		39.5	-107.383	0.01	67	67	67	UNKNOWN	SEDIMENTARY	UNKNOWN	UNKNOWN	LIMESTONE		3.2	0.06	1.1		0.38		0.1		0.02	1.5	50		0.12	0.27	0.01									0.18	140		2.4	0.75		47
D115678		USGS		Geochemistry of rock samples from the National Geochemical Database: U.S. Geological Survey, Reston, VA.	U.S. Geological Survey	USGS		34.8833	-112.883	0.01	67	67	67	UNKNOWN	SEDIMENTARY	UNKNOWN	UNKNOWN	LIMESTONE																									3.2	600		3	30
D115679		USGS		Geochemistry of rock samples from the National Geochemical Database: U.S. Geological Survey, Reston, VA.	U.S. Geological Survey	USGS		38.8833	-104.883	0.01	69	69	69	MISC	SEDIMENTARY	UNKNOWN	UNKNOWN	LIMESTONE																		40.6
D115679		USGS		Geochemistry of rock samples from the National Geochemical Database: U.S. Geological Survey, Reston, VA.	U.S. Geological Survey	USGS		38.8833	-104.883	0.01	69	69	69	UNKNOWN	SEDIMENTARY	UNKNOWN	UNKNOWN	LIMESTONE		6.9	0.07	1.2		0.68		0.42		0.13	10.5	37.5		0.12	0.84	0.06									0.82	540			7
D115680		USGS		Geochemistry of rock samples from the National Geochemical Database: U.S. Geological Survey, Reston, VA.	U.S. Geological Survey	USGS		38.8833	-104.883	0.01	69	69	69	MISC	SEDIMENTARY	UNKNOWN	UNKNOWN	LIMESTONE																		40.6
D115696		USGS		Geochemistry of rock samples from the National Geochemical Database: U.S. Geological Survey, Reston, VA.	U.S. Geological Survey	USGS		38.8833	-104.883	0.01	69	69	69	MISC	SEDIMENTARY	UNKNOWN	UNKNOWN	LIMESTONE																		40.7
D115680		USGS		Geochemistry of rock samples from the National Geochemical Database: U.S. Geological Survey, Reston, VA.	U.S. Geological Survey	USGS		38.8833	-104.883	0.01	69	69	69	UNKNOWN	SEDIMENTARY	UNKNOWN	UNKNOWN	LIMESTONE		6.9	0.07	1.2		0.66		0.44		0.14	11.6	35.2		0.12	0.83	0.05									0.79	530			30
D115682		USGS		Geochemistry of rock samples from the National Geochemical Database: U.S. Geological Survey, Reston, VA.	U.S. Geological Survey	USGS		47.25	-112.5	0.01	67	67	67	MISC	SEDIMENTARY	UNKNOWN	UNKNOWN	LIMESTONE																		40.7
D115682		USGS		Geochemistry of rock samples from the National Geochemical Database: U.S. Geological Survey, Reston, VA.	U.S. Geological Survey	USGS		47.25	-112.5	0.01	67	67	67	UNKNOWN	SEDIMENTARY	UNKNOWN	UNKNOWN	LIMESTONE		3.3	0.07	1.2		0.68		0.52		0.04	2.6	48.9		0.12	0.47	0.05									0.5	270	6.6	2.8	2.5
D115683		USGS		Geochemistry of rock samples from the National Geochemical Database: U.S. Geological Survey, Reston, VA.	U.S. Geological Survey	USGS		38.8833	-104.883	0.01	69	69	69	MISC	SEDIMENTARY	UNKNOWN	UNKNOWN	LIMESTONE																		40.7
D115700		USGS		Geochemistry of rock samples from the National Geochemical Database: U.S. Geological Survey, Reston, VA.	U.S. Geological Survey	USGS		43.25	-107.883	0.01	67	67	67	MISC	SEDIMENTARY	UNKNOWN	UNKNOWN	LIMESTONE																		35
D115683		USGS		Geochemistry of rock samples from the National Geochemical Database: U.S. Geological Survey, Reston, VA.	U.S. Geological Survey	USGS		38.8833	-104.883	0.01	69	69	69	UNKNOWN	SEDIMENTARY	UNKNOWN	UNKNOWN	LIMESTONE		6.5	0.07	1		0.56		0.44		0.11	10.7	36.6		0.12	0.86	0.02									0.86	600			7
D115684		USGS		Geochemistry of rock samples from the National Geochemical Database: U.S. Geological Survey, Reston, VA.	U.S. Geological Survey	USGS		39.8833	-113.883	0.01	67	67	67	MISC	SEDIMENTARY	UNKNOWN	UNKNOWN	LIMESTONE																		42.5
D115684		USGS		Geochemistry of rock samples from the National Geochemical Database: U.S. Geological Survey, Reston, VA.	U.S. Geological Survey	USGS		39.8833	-113.883	0.01	67	67	67	UNKNOWN	SEDIMENTARY	UNKNOWN	UNKNOWN	LIMESTONE		1.8	0.04	0.6		0.43		0.12		0.01	3	49		0.06	0.36	0.02									0.25	38	4.7		2.7		42
D115685		USGS		Geochemistry of rock samples from the National Geochemical Database: U.S. Geological Survey, Reston, VA.	U.S. Geological Survey	USGS		38.8833	-104.883	0.01	69	69	69	MISC	SEDIMENTARY	UNKNOWN	UNKNOWN	LIMESTONE																		40.8
D115685		USGS		Geochemistry of rock samples from the National Geochemical Database: U.S. Geological Survey, Reston, VA.	U.S. Geological Survey	USGS		38.8833	-104.883	0.01	69	69	69	UNKNOWN	SEDIMENTARY	UNKNOWN	UNKNOWN	LIMESTONE		6.8	0.07	1		0.58		0.42		0.11	10.8	37		1.8	0.83	0.05									0.79	550			5
D115686		USGS		Geochemistry of rock samples from the National Geochemical Database: U.S. Geological Survey, Reston, VA.	U.S. Geological Survey	USGS		41.6333	-111.5	0.01	67	67	67	MISC	SEDIMENTARY	UNKNOWN	UNKNOWN	LIMESTONE																		41.2
D115686		USGS		Geochemistry of rock samples from the National Geochemical Database: U.S. Geological Survey, Reston, VA.	U.S. Geological Survey	USGS		41.6333	-111.5	0.01	67	67	67	UNKNOWN	SEDIMENTARY	UNKNOWN	UNKNOWN	LIMESTONE		3.4	0.04	0.5		0.34		0.24		0.01	2.4	48.9		0.12	0.51	0.01									0.26	32	4.1	2.7	1.7
D115688		USGS		Geochemistry of rock samples from the National Geochemical Database: U.S. Geological Survey, Reston, VA.	U.S. Geological Survey	USGS		31.3833	-110.25	0.01	69	68	67	MISC	SEDIMENTARY	UNKNOWN	UNKNOWN	LIMESTONE																		33.6
D115688		USGS		Geochemistry of rock samples from the National Geochemical Database: U.S. Geological Survey, Reston, VA.	U.S. Geological Survey	USGS		31.3833	-110.25	0.01	69	68	67	UNKNOWN	SEDIMENTARY	UNKNOWN	UNKNOWN	LIMESTONE		13	0.15	2.2		0.88		0.52		0.05	0.9	43.9		1.2	1.7	0.26									0.62	290	4.9	3	2
D115689		USGS		Geochemistry of rock samples from the National Geochemical Database: U.S. Geological Survey, Reston, VA.	U.S. Geological Survey	USGS		38.8833	-104.883	0.01	69	69	69	MISC	SEDIMENTARY	UNKNOWN	UNKNOWN	LIMESTONE																		40.6
D115706		USGS		Geochemistry of rock samples from the National Geochemical Database: U.S. Geological Survey, Reston, VA.	U.S. Geological Survey	USGS		44	-103.25	0.01	69	68	67	MISC	SEDIMENTARY	UNKNOWN	UNKNOWN	LIMESTONE																		42.9
D115689		USGS		Geochemistry of rock samples from the National Geochemical Database: U.S. Geological Survey, Reston, VA.	U.S. Geological Survey	USGS		38.8833	-104.883	0.01	69	69	69	UNKNOWN	SEDIMENTARY	UNKNOWN	UNKNOWN	LIMESTONE		6.7	0.06	1		0.67		0.44		0.09	10.8	35.9		0.75	0.84	0.05									0.82	560			7
D115690		USGS		Geochemistry of rock samples from the National Geochemical Database: U.S. Geological Survey, Reston, VA.	U.S. Geological Survey	USGS		41.5	-111.633	0.01	67	67	67	MISC	SEDIMENTARY	UNKNOWN	UNKNOWN	LIMESTONE																		32.7
D115690		USGS		Geochemistry of rock samples from the National Geochemical Database: U.S. Geological Survey, Reston, VA.	U.S. Geological Survey	USGS		41.5	-111.633	0.01	67	67	67	UNKNOWN	SEDIMENTARY	UNKNOWN	UNKNOWN	LIMESTONE		25.4	0.13	2.5		0.76		0.64		0.12	14.1	21.5		0.12	1.4	0.08									0.56	230	3.5	2.2	3.9		42
D115691		USGS		Geochemistry of rock samples from the National Geochemical Database: U.S. Geological Survey, Reston, VA.	U.S. Geological Survey	USGS		43.3833	-107.883	0.01	67	67	67	MISC	SEDIMENTARY	UNKNOWN	UNKNOWN	LIMESTONE																		35
D115691		USGS		Geochemistry of rock samples from the National Geochemical Database: U.S. Geological Survey, Reston, VA.	U.S. Geological Survey	USGS		43.3833	-107.883	0.01	67	67	67	UNKNOWN	SEDIMENTARY	UNKNOWN	UNKNOWN	LIMESTONE		12.1	0.06	0.8		0.6		0.16		0.06	0.6	49		1.4	0.79	0.13									0.32	350	3.2		2.8
D115692		USGS		Geochemistry of rock samples from the National Geochemical Database: U.S. Geological Survey, Reston, VA.	U.S. Geological Survey	USGS		42.5	-107.883	0.01	67	67	67	MISC	SEDIMENTARY	UNKNOWN	UNKNOWN	LIMESTONE																		30.3
D115692		USGS		Geochemistry of rock samples from the National Geochemical Database: U.S. Geological Survey, Reston, VA.	U.S. Geological Survey	USGS		42.5	-107.883	0.01	67	67	67	UNKNOWN	SEDIMENTARY	UNKNOWN	UNKNOWN	LIMESTONE		23.3	0.09	3.8		1.1		0.16		0.15	0.1	39.5		0.22	2	0.18									0.65	530	4.3	4.5	3.4		44
D115693		USGS		Geochemistry of rock samples from the National Geochemical Database: U.S. Geological Survey, Reston, VA.	U.S. Geological Survey	USGS		40.25	-111.5	0.01	67	67	67	MISC	SEDIMENTARY	UNKNOWN	UNKNOWN	LIMESTONE																		41.2
D115693		USGS		Geochemistry of rock samples from the National Geochemical Database: U.S. Geological Survey, Reston, VA.	U.S. Geological Survey	USGS		40.25	-111.5	0.01	67	67	67	UNKNOWN	SEDIMENTARY	UNKNOWN	UNKNOWN	LIMESTONE		2.9	0.07	1.1		0.54		0.16		0.01	1.8	49.5		0.07	0.57	0.05									0.21	150	2.1	2.5	2.6
D115696		USGS		Geochemistry of rock samples from the National Geochemical Database: U.S. Geological Survey, Reston, VA.	U.S. Geological Survey	USGS		38.8833	-104.883	0.01	69	69	69	UNKNOWN	SEDIMENTARY	UNKNOWN	UNKNOWN	LIMESTONE		7.3	0.07	1.2		0.6		0.44		0.11	11.6	35.5		0.96	0.83	0.05									0.8	560			10
D115697		USGS		Geochemistry of rock samples from the National Geochemical Database: U.S. Geological Survey, Reston, VA.	U.S. Geological Survey	USGS		38.8833	-104.883	0.01	69	69	69	MISC	SEDIMENTARY	UNKNOWN	UNKNOWN	LIMESTONE																		40.7
D115697		USGS		Geochemistry of rock samples from the National Geochemical Database: U.S. Geological Survey, Reston, VA.	U.S. Geological Survey	USGS		38.8833	-104.883	0.01	69	69	69	UNKNOWN	SEDIMENTARY	UNKNOWN	UNKNOWN	LIMESTONE		6.6	0.07	0.9		0.6		0.4		0.11	11.5	35.1		2	0.84	0.05									0.79	510			7
D115698		USGS		Geochemistry of rock samples from the National Geochemical Database: U.S. Geological Survey, Reston, VA.	U.S. Geological Survey	USGS		34.8833	-112.75	0.01	67	67	67	UNKNOWN	SEDIMENTARY	UNKNOWN	UNKNOWN	LIMESTONE																									2.9	1200		15	10
D115699		USGS		Geochemistry of rock samples from the National Geochemical Database: U.S. Geological Survey, Reston, VA.	U.S. Geological Survey	USGS		38.8833	-104.883	0.01	69	69	69	MISC	SEDIMENTARY	UNKNOWN	UNKNOWN	LIMESTONE																		40.6
D115699		USGS		Geochemistry of rock samples from the National Geochemical Database: U.S. Geological Survey, Reston, VA.	U.S. Geological Survey	USGS		38.8833	-104.883	0.01	69	69	69	UNKNOWN	SEDIMENTARY	UNKNOWN	UNKNOWN	LIMESTONE		6.5	0.07	0.8		0.62		0.38		0.11	11.5	36.5		0.12	0.86	0.18									0.79	540			7
D115700		USGS		Geochemistry of rock samples from the National Geochemical Database: U.S. Geological Survey, Reston, VA.	U.S. Geological Survey	USGS		43.25	-107.883	0.01	67	67	67	UNKNOWN	SEDIMENTARY	UNKNOWN	UNKNOWN	LIMESTONE		11.5	0.07	1.4		1.2		0.16		0.27	0.5	46.4			1.3	0.06									0.51	550		3.5	1.8
D115701		USGS		Geochemistry of rock samples from the National Geochemical Database: U.S. Geological Survey, Reston, VA.	U.S. Geological Survey	USGS		32.3833	-109.133	0.01	69	69	69	UNKNOWN	SEDIMENTARY	UNKNOWN	UNKNOWN	LIMESTONE																									1	290			5
D115702		USGS		Geochemistry of rock samples from the National Geochemical Database: U.S. Geological Survey, Reston, VA.	U.S. Geological Survey	USGS		43	-112.133	0.01	69	68	67	MISC	SEDIMENTARY	UNKNOWN	UNKNOWN	LIMESTONE																		45.8
D115702		USGS		Geochemistry of rock samples from the National Geochemical Database: U.S. Geological Survey, Reston, VA.	U.S. Geological Survey	USGS		43	-112.133	0.01	69	68	67	UNKNOWN	SEDIMENTARY	UNKNOWN	UNKNOWN	LIMESTONE		1	0.02	1.5		0.6		0.08		0.45	17.2	34		0.12	0.1	0.38									0.31	130		2.2	5.4		75
D115703		USGS		Geochemistry of rock samples from the National Geochemical Database: U.S. Geological Survey, Reston, VA.	U.S. Geological Survey	USGS		42.5	-107.883	0.01	67	67	67	MISC	SEDIMENTARY	UNKNOWN	UNKNOWN	LIMESTONE																		28.5
D115722		USGS		Geochemistry of rock samples from the National Geochemical Database: U.S. Geological Survey, Reston, VA.	U.S. Geological Survey	USGS		38.8833	-104.883	0.01	69	69	69	MISC	SEDIMENTARY	UNKNOWN	UNKNOWN	LIMESTONE																		41
D115703		USGS		Geochemistry of rock samples from the National Geochemical Database: U.S. Geological Survey, Reston, VA.	U.S. Geological Survey	USGS		42.5	-107.883	0.01	67	67	67	UNKNOWN	SEDIMENTARY	UNKNOWN	UNKNOWN	LIMESTONE		26.6	0.12	4		1.6		0.16		0.13	0.2	35.8			2.1	0.01									0.71	420	2.1	3.7	2.2
D115704		USGS		Geochemistry of rock samples from the National Geochemical Database: U.S. Geological Survey, Reston, VA.	U.S. Geological Survey	USGS		45.75	-111.633	0.01	67	67	67	MISC	SEDIMENTARY	UNKNOWN	UNKNOWN	LIMESTONE																		45.8
D115704		USGS		Geochemistry of rock samples from the National Geochemical Database: U.S. Geological Survey, Reston, VA.	U.S. Geological Survey	USGS		45.75	-111.633	0.01	67	67	67	UNKNOWN	SEDIMENTARY	UNKNOWN	UNKNOWN	LIMESTONE		1.3	0.02	0.1		0.31		0.04		0.04	19.2	30.6		3.1	0.21	0.54									0.26	140	3.9		4.3		30
D115706		USGS		Geochemistry of rock samples from the National Geochemical Database: U.S. Geological Survey, Reston, VA.	U.S. Geological Survey	USGS		44	-103.25	0.01	69	68	67	UNKNOWN	SEDIMENTARY	UNKNOWN	UNKNOWN	LIMESTONE		3.5	0.02	0.53				0.05		0.04	21.9	29.5		0.08	0.11										0.34	1100		5.1	18
D115708		USGS		Geochemistry of rock samples from the National Geochemical Database: U.S. Geological Survey, Reston, VA.	U.S. Geological Survey	USGS		38.8833	-104.883	0.01	69	69	69	MISC	SEDIMENTARY	UNKNOWN	UNKNOWN	LIMESTONE																		40.6
D115708		USGS		Geochemistry of rock samples from the National Geochemical Database: U.S. Geological Survey, Reston, VA.	U.S. Geological Survey	USGS		38.8833	-104.883	0.01	69	69	69	UNKNOWN	SEDIMENTARY	UNKNOWN	UNKNOWN	LIMESTONE		6.7	0.07	0.9		0.6		0.4		0.1	11.6	36.4		0.1	0.82	0.02									0.88	650			7
D115709		USGS		Geochemistry of rock samples from the National Geochemical Database: U.S. Geological Survey, Reston, VA.	U.S. Geological Survey	USGS		38.5	-105.133	0.01	69	69	69	MISC	SEDIMENTARY	UNKNOWN	UNKNOWN	LIMESTONE																		44.8
D115709		USGS		Geochemistry of rock samples from the National Geochemical Database: U.S. Geological Survey, Reston, VA.	U.S. Geological Survey	USGS		38.5	-105.133	0.01	69	69	69	UNKNOWN	SEDIMENTARY	UNKNOWN	UNKNOWN	LIMESTONE		2.6	0.03	0.5		0.72		0.28		0.28	19.7	28.6		0.09	0.14	0.06									0.52	420	3.1	7.3	3.1
D115710		USGS		Geochemistry of rock samples from the National Geochemical Database: U.S. Geological Survey, Reston, VA.	U.S. Geological Survey	USGS		38.8833	-104.883	0.01	69	69	69	MISC	SEDIMENTARY	UNKNOWN	UNKNOWN	LIMESTONE																		40.6
D115710		USGS		Geochemistry of rock samples from the National Geochemical Database: U.S. Geological Survey, Reston, VA.	U.S. Geological Survey	USGS		38.8833	-104.883	0.01	69	69	69	UNKNOWN	SEDIMENTARY	UNKNOWN	UNKNOWN	LIMESTONE		6.4	0.07	1.1		0.6		0.4		0.11	11.6	36			0.83	0.04									0.88	690			7
D115711		USGS		Geochemistry of rock samples from the National Geochemical Database: U.S. Geological Survey, Reston, VA.	U.S. Geological Survey	USGS		34.8833	-112.75	0.01	67	67	67	UNKNOWN	SEDIMENTARY	UNKNOWN	UNKNOWN	LIMESTONE																									3.1	500		5	100
D115712		USGS		Geochemistry of rock samples from the National Geochemical Database: U.S. Geological Survey, Reston, VA.	U.S. Geological Survey	USGS		36.8833	-115.25	0.01	67	67	67	MISC	SEDIMENTARY	UNKNOWN	UNKNOWN	LIMESTONE																		24.6
D115712		USGS		Geochemistry of rock samples from the National Geochemical Database: U.S. Geological Survey, Reston, VA.	U.S. Geological Survey	USGS		36.8833	-115.25	0.01	67	67	67	UNKNOWN	SEDIMENTARY	UNKNOWN	UNKNOWN	LIMESTONE		36.7	0.25	3.7		0.63		0.02		0.01	1.9	27.7		0.1	2.1	0.01									0.2	27		2.3	1.1		58
D115713		USGS		Geochemistry of rock samples from the National Geochemical Database: U.S. Geological Survey, Reston, VA.	U.S. Geological Survey	USGS		47.8833	-108.5	0.01	69	68	67	MISC	SEDIMENTARY	UNKNOWN	UNKNOWN	LIMESTONE																		14.4
D115713		USGS		Geochemistry of rock samples from the National Geochemical Database: U.S. Geological Survey, Reston, VA.	U.S. Geological Survey	USGS		47.8833	-108.5	0.01	69	68	67	UNKNOWN	SEDIMENTARY	UNKNOWN	UNKNOWN	LIMESTONE		55.7	0.21	7		1.2		0.56		0.11	0.4	16.7		0.24	4.1	0.21									1.8	400		3	2
D115714		USGS		Geochemistry of rock samples from the National Geochemical Database: U.S. Geological Survey, Reston, VA.	U.S. Geological Survey	USGS		47.1333	-112.5	0.01	67	67	67	MISC	SEDIMENTARY	UNKNOWN	UNKNOWN	LIMESTONE																		46.9
D115714		USGS		Geochemistry of rock samples from the National Geochemical Database: U.S. Geological Survey, Reston, VA.	U.S. Geological Survey	USGS		47.1333	-112.5	0.01	67	67	67	UNKNOWN	SEDIMENTARY	UNKNOWN	UNKNOWN	LIMESTONE		0.4	0.01	0.1		0.15				0.02	21.7	31.1			0.08	0.01									0.045	35		1.3	0.89
D115716		USGS		Geochemistry of rock samples from the National Geochemical Database: U.S. Geological Survey, Reston, VA.	U.S. Geological Survey	USGS		44.5	-107	0.01	67	67	67	UNKNOWN	SEDIMENTARY	UNKNOWN	UNKNOWN	LIMESTONE		31.3	0.09	2.2		1		0.22		0.05	0.3	36.6			1.3	0.69									0.44	160		2.6	1.7		38
D115717		USGS		Geochemistry of rock samples from the National Geochemical Database: U.S. Geological Survey, Reston, VA.	U.S. Geological Survey	USGS		40	-113.75	0.01	67	67	67	MISC	SEDIMENTARY	UNKNOWN	UNKNOWN	LIMESTONE																		33.7
D115717		USGS		Geochemistry of rock samples from the National Geochemical Database: U.S. Geological Survey, Reston, VA.	U.S. Geological Survey	USGS		40	-113.75	0.01	67	67	67	UNKNOWN	SEDIMENTARY	UNKNOWN	UNKNOWN	LIMESTONE		16.1	0.23	4.7		1.3		1.2		0.02	1.6	39.1		0.17	0.52	0.04									1	220	8.5	4.8	5		29
D115718		USGS		Geochemistry of rock samples from the National Geochemical Database: U.S. Geological Survey, Reston, VA.	U.S. Geological Survey	USGS		34.5	-115.383	0.01	67	67	67	MISC	SEDIMENTARY	UNKNOWN	UNKNOWN	LIMESTONE																		41
D115718		USGS		Geochemistry of rock samples from the National Geochemical Database: U.S. Geological Survey, Reston, VA.	U.S. Geological Survey	USGS		34.5	-115.383	0.01	67	67	67	UNKNOWN	SEDIMENTARY	UNKNOWN	UNKNOWN	LIMESTONE		3.4	0.05	1.8		0.54		0.16		0.01	1.9	49.9			0.57	0.12									0.28		2.5		2.2		130
D115719		USGS		Geochemistry of rock samples from the National Geochemical Database: U.S. Geological Survey, Reston, VA.	U.S. Geological Survey	USGS		43	-112.133	0.01	69	68	67	UNKNOWN	SEDIMENTARY	UNKNOWN	UNKNOWN	LIMESTONE		5.2	0.05	0.88		0.12		0.14		0.05	0.58	51.1		0.08	0.38	0.14									0.16	260	2.1	1.9	1.2		60
D115720		USGS		Geochemistry of rock samples from the National Geochemical Database: U.S. Geological Survey, Reston, VA.	U.S. Geological Survey	USGS		42.5	-108	0.01	67	67	67	MISC	SEDIMENTARY	UNKNOWN	UNKNOWN	LIMESTONE																		28.6
D115720		USGS		Geochemistry of rock samples from the National Geochemical Database: U.S. Geological Survey, Reston, VA.	U.S. Geological Survey	USGS		42.5	-108	0.01	67	67	67	UNKNOWN	SEDIMENTARY	UNKNOWN	UNKNOWN	LIMESTONE		30.8	0.08	1.7		0.2				0.04	0.33	37.4			1	0.05									0.66	240	7.5	11	21		69
D115722		USGS		Geochemistry of rock samples from the National Geochemical Database: U.S. Geological Survey, Reston, VA.	U.S. Geological Survey	USGS		38.8833	-104.883	0.01	69	69	69	UNKNOWN	SEDIMENTARY	UNKNOWN	UNKNOWN	LIMESTONE		6.6	0.06	1.6		0.52		0.38		0.05	11.9	36.2		0.2	0.83	0.04									0.82	620			5
D115723		USGS		Geochemistry of rock samples from the National Geochemical Database: U.S. Geological Survey, Reston, VA.	U.S. Geological Survey	USGS		31.5	-110.383	0.01	69	68	67	MISC	SEDIMENTARY	UNKNOWN	UNKNOWN	LIMESTONE																		23.7
D115723		USGS		Geochemistry of rock samples from the National Geochemical Database: U.S. Geological Survey, Reston, VA.	U.S. Geological Survey	USGS		31.5	-110.383	0.01	69	68	67	UNKNOWN	SEDIMENTARY	UNKNOWN	UNKNOWN	LIMESTONE		31.2	0.48	8		2.3		0.46		0.09	1.1	23.6		3.8	3.1	0.16									1.3	520	8.1	6.8	6.2		86
D115724		USGS		Geochemistry of rock samples from the National Geochemical Database: U.S. Geological Survey, Reston, VA.	U.S. Geological Survey	USGS		38.8833	-104.883	0.01	69	69	69	MISC	SEDIMENTARY	UNKNOWN	UNKNOWN	LIMESTONE																		40.8
D115724		USGS		Geochemistry of rock samples from the National Geochemical Database: U.S. Geological Survey, Reston, VA.	U.S. Geological Survey	USGS		38.8833	-104.883	0.01	69	69	69	UNKNOWN	SEDIMENTARY	UNKNOWN	UNKNOWN	LIMESTONE		7.5	0.07	1.8		0.6		0.42		0.06	11.2	37.2		1.7	0.92	0.05									0.81	620			7
D115725		USGS		Geochemistry of rock samples from the National Geochemical Database: U.S. Geological Survey, Reston, VA.	U.S. Geological Survey	USGS		34.5	-115.5	0.01	67	67	67	MISC	SEDIMENTARY	UNKNOWN	UNKNOWN	LIMESTONE																		33.7
D115725		USGS		Geochemistry of rock samples from the National Geochemical Database: U.S. Geological Survey, Reston, VA.	U.S. Geological Survey	USGS		34.5	-115.5	0.01	67	67	67	UNKNOWN	SEDIMENTARY	UNKNOWN	UNKNOWN	LIMESTONE		14.1	0.2	5.1		1.3		1.7		0.22	1.7	42.1		0.05	1	0.06									2.6	1400		7	5
D115726		USGS		Geochemistry of rock samples from the National Geochemical Database: U.S. Geological Survey, Reston, VA.	U.S. Geological Survey	USGS		38.8833	-104.883	0.01	69	69	69	MISC	SEDIMENTARY	UNKNOWN	UNKNOWN	LIMESTONE																		40.7
D115726		USGS		Geochemistry of rock samples from the National Geochemical Database: U.S. Geological Survey, Reston, VA.	U.S. Geological Survey	USGS		38.8833	-104.883	0.01	69	69	69	UNKNOWN	SEDIMENTARY	UNKNOWN	UNKNOWN	LIMESTONE		7	0.07	1.5		0.6		0.4		0.06	11.3	37.1		1.7	0.93	0.05									0.9	670			7
D115730		USGS		Geochemistry of rock samples from the National Geochemical Database: U.S. Geological Survey, Reston, VA.	U.S. Geological Survey	USGS		32.8833	-110.633	0.01	69	68	67	MISC	SEDIMENTARY	UNKNOWN	UNKNOWN	LIMESTONE																		42
D115730		USGS		Geochemistry of rock samples from the National Geochemical Database: U.S. Geological Survey, Reston, VA.	U.S. Geological Survey	USGS		32.8833	-110.633	0.01	69	68	67	UNKNOWN	SEDIMENTARY	UNKNOWN	UNKNOWN	LIMESTONE		10	0.07	1.5		0.7		0.06		0.02	15	31.6			0.42	0.02									0.43	180	5.4	2.8	1.4
D115731		USGS		Geochemistry of rock samples from the National Geochemical Database: U.S. Geological Survey, Reston, VA.	U.S. Geological Survey	USGS		34.8833	-112.883	0.01	67	67	67	UNKNOWN	SEDIMENTARY	UNKNOWN	UNKNOWN	LIMESTONE																									3.9	500		5	15
D115732		USGS		Geochemistry of rock samples from the National Geochemical Database: U.S. Geological Survey, Reston, VA.	U.S. Geological Survey	USGS		38.8833	-104.883	0.01	69	69	69	MISC	SEDIMENTARY	UNKNOWN	UNKNOWN	LIMESTONE																		40.9
D115732		USGS		Geochemistry of rock samples from the National Geochemical Database: U.S. Geological Survey, Reston, VA.	U.S. Geological Survey	USGS		38.8833	-104.883	0.01	69	69	69	UNKNOWN	SEDIMENTARY	UNKNOWN	UNKNOWN	LIMESTONE		7	0.07	1.5		0.6		0.42		0.06	11.9	36.8			0.84	0.05									0.96	720			7
D115733		USGS		Geochemistry of rock samples from the National Geochemical Database: U.S. Geological Survey, Reston, VA.	U.S. Geological Survey	USGS		43	-112.133	0.01	69	68	67	MISC	SEDIMENTARY	UNKNOWN	UNKNOWN	LIMESTONE																		34.5
D115733		USGS		Geochemistry of rock samples from the National Geochemical Database: U.S. Geological Survey, Reston, VA.	U.S. Geological Survey	USGS		43	-112.133	0.01	69	68	67	UNKNOWN	SEDIMENTARY	UNKNOWN	UNKNOWN	LIMESTONE		23.8	0.12	1.9		2.3		0.12		0.04	15.6	19.6		3.1	0.29	0.09									0.87	160	6.4	3.3	1.4		50
D115735		USGS		Geochemistry of rock samples from the National Geochemical Database: U.S. Geological Survey, Reston, VA.	U.S. Geological Survey	USGS		38.6333	-106.383	0.01	69	69	69	MISC	SEDIMENTARY	UNKNOWN	UNKNOWN	LIMESTONE																		41.5
D115735		USGS		Geochemistry of rock samples from the National Geochemical Database: U.S. Geological Survey, Reston, VA.	U.S. Geological Survey	USGS		38.6333	-106.383	0.01	69	69	69	UNKNOWN	SEDIMENTARY	UNKNOWN	UNKNOWN	LIMESTONE		5.4	0.07	1.6		0.63		0.12		0.08	17.4	31			0.57	0.42									0.5	350	5		34		160
D115736		USGS		Geochemistry of rock samples from the National Geochemical Database: U.S. Geological Survey, Reston, VA.	U.S. Geological Survey	USGS		45.8833	-111.25	0.01	67	67	67	MISC	SEDIMENTARY	UNKNOWN	UNKNOWN	LIMESTONE																		43
D115736		USGS		Geochemistry of rock samples from the National Geochemical Database: U.S. Geological Survey, Reston, VA.	U.S. Geological Survey	USGS		45.8833	-111.25	0.01	67	67	67	UNKNOWN	SEDIMENTARY	UNKNOWN	UNKNOWN	LIMESTONE		1		0.37		0.33		0.08			0.57	52.3		1.5	0.96										0.21	56	3	2.3	9
D115737		USGS		Geochemistry of rock samples from the National Geochemical Database: U.S. Geological Survey, Reston, VA.	U.S. Geological Survey	USGS		38.8833	-104.883	0.01	69	69	69	MISC	SEDIMENTARY	UNKNOWN	UNKNOWN	LIMESTONE																		40.9
D115737		USGS		Geochemistry of rock samples from the National Geochemical Database: U.S. Geological Survey, Reston, VA.	U.S. Geological Survey	USGS		38.8833	-104.883	0.01	69	69	69	UNKNOWN	SEDIMENTARY	UNKNOWN	UNKNOWN	LIMESTONE		6.5	0.07	0.8		0.68		0.42		0.06	10.8	36.3		2.1	0.88	0.05									1.1	200			7
D115738		USGS		Geochemistry of rock samples from the National Geochemical Database: U.S. Geological Survey, Reston, VA.	U.S. Geological Survey	USGS		38.8833	-104.883	0.01	69	69	69	MISC	SEDIMENTARY	UNKNOWN	UNKNOWN	LIMESTONE																		41
D115738		USGS		Geochemistry of rock samples from the National Geochemical Database: U.S. Geological Survey, Reston, VA.	U.S. Geological Survey	USGS		38.8833	-104.883	0.01	69	69	69	UNKNOWN	SEDIMENTARY	UNKNOWN	UNKNOWN	LIMESTONE		8.8	0.07	1.1		0.5		0.44		0.05	11.9	35.3			0.81	0.05									1	200		3	7
D115739		USGS		Geochemistry of rock samples from the National Geochemical Database: U.S. Geological Survey, Reston, VA.	U.S. Geological Survey	USGS		45.75	-111.633	0.01	67	67	67	MISC	SEDIMENTARY	UNKNOWN	UNKNOWN	LIMESTONE																		43.9
D115739		USGS		Geochemistry of rock samples from the National Geochemical Database: U.S. Geological Survey, Reston, VA.	U.S. Geological Survey	USGS		45.75	-111.633	0.01	67	67	67	UNKNOWN	SEDIMENTARY	UNKNOWN	UNKNOWN	LIMESTONE		0.8	0.01	0.3		0.27		0.08		0.01	5.3	50			0.15										0.08	230			1.4
D115740		USGS		Geochemistry of rock samples from the National Geochemical Database: U.S. Geological Survey, Reston, VA.	U.S. Geological Survey	USGS		44.25	-103.75	0.01	69	68	67	MISC	SEDIMENTARY	UNKNOWN	UNKNOWN	LIMESTONE																		27.2
D115740		USGS		Geochemistry of rock samples from the National Geochemical Database: U.S. Geological Survey, Reston, VA.	U.S. Geological Survey	USGS		44.25	-103.75	0.01	69	68	67	UNKNOWN	SEDIMENTARY	UNKNOWN	UNKNOWN	LIMESTONE		31.3	0.13	2.5		2		0.4		0.18	0.5	33.9		1.8	1.4	0.06									1.2	790	5.6	4.8	1.3		42
D115741		USGS		Geochemistry of rock samples from the National Geochemical Database: U.S. Geological Survey, Reston, VA.	U.S. Geological Survey	USGS		36.75	-115.25	0.01	67	67	67	MISC	SEDIMENTARY	UNKNOWN	UNKNOWN	LIMESTONE																		43.3
D115741		USGS		Geochemistry of rock samples from the National Geochemical Database: U.S. Geological Survey, Reston, VA.	U.S. Geological Survey	USGS		36.75	-115.25	0.01	67	67	67	UNKNOWN	SEDIMENTARY	UNKNOWN	UNKNOWN	LIMESTONE		0.7		0.6		0.18		0.08			1.1	54.2													0.053	23	2.6	2	0.51		44
D115744		USGS		Geochemistry of rock samples from the National Geochemical Database: U.S. Geological Survey, Reston, VA.	U.S. Geological Survey	USGS		39.8833	-113.883	0.01	67	67	67	MISC	SEDIMENTARY	UNKNOWN	UNKNOWN	LIMESTONE																		42.8
D115744		USGS		Geochemistry of rock samples from the National Geochemical Database: U.S. Geological Survey, Reston, VA.	U.S. Geological Survey	USGS		39.8833	-113.883	0.01	67	67	67	UNKNOWN	SEDIMENTARY	UNKNOWN	UNKNOWN	LIMESTONE		1.3	0.01	0.8		0.4		0.12		0.01	3	49.9			0.36	0.01									0.29	59	3		0.62
D115745		USGS		Geochemistry of rock samples from the National Geochemical Database: U.S. Geological Survey, Reston, VA.	U.S. Geological Survey	USGS		44.3833	-103.633	0.01	69	68	67	MISC	SEDIMENTARY	UNKNOWN	UNKNOWN	LIMESTONE																		29.8
D115781		USGS		Geochemistry of rock samples from the National Geochemical Database: U.S. Geological Survey, Reston, VA.	U.S. Geological Survey	USGS		31.6333	-110	0.01	69	68	67	MISC	SEDIMENTARY	UNKNOWN	UNKNOWN	LIMESTONE																		39.5
D115745		USGS		Geochemistry of rock samples from the National Geochemical Database: U.S. Geological Survey, Reston, VA.	U.S. Geological Survey	USGS		44.3833	-103.633	0.01	69	68	67	UNKNOWN	SEDIMENTARY	UNKNOWN	UNKNOWN	LIMESTONE		26.6	0.1	2.3		2.3		1.3		0.23	2	33.9		0.1	1.3	0.37									1.2	1300	8.7	11	7.9
D115746		USGS		Geochemistry of rock samples from the National Geochemical Database: U.S. Geological Survey, Reston, VA.	U.S. Geological Survey	USGS		38.8833	-104.883	0.01	69	69	69	MISC	SEDIMENTARY	UNKNOWN	UNKNOWN	LIMESTONE																		40.8
D115746		USGS		Geochemistry of rock samples from the National Geochemical Database: U.S. Geological Survey, Reston, VA.	U.S. Geological Survey	USGS		38.8833	-104.883	0.01	69	69	69	UNKNOWN	SEDIMENTARY	UNKNOWN	UNKNOWN	LIMESTONE		8.9	0.07	1.3		0.6		0.36		0.05	12.7	33.8		2.1	0.85	0.05									1.1	300			7
D115747		USGS		Geochemistry of rock samples from the National Geochemical Database: U.S. Geological Survey, Reston, VA.	U.S. Geological Survey	USGS		38.8833	-104.883	0.01	69	69	69	MISC	SEDIMENTARY	UNKNOWN	UNKNOWN	LIMESTONE																		41.8
D115747		USGS		Geochemistry of rock samples from the National Geochemical Database: U.S. Geological Survey, Reston, VA.	U.S. Geological Survey	USGS		38.8833	-104.883	0.01	69	69	69	UNKNOWN	SEDIMENTARY	UNKNOWN	UNKNOWN	LIMESTONE		7	0.07	1.3		0.62		0.38		0.06	11.5	34.8		0.1	0.82	0.06									1	750			7
D115749		USGS		Geochemistry of rock samples from the National Geochemical Database: U.S. Geological Survey, Reston, VA.	U.S. Geological Survey	USGS		39.8833	-113.883	0.01	67	67	67	MISC	SEDIMENTARY	UNKNOWN	UNKNOWN	LIMESTONE																		43.5
D115749		USGS		Geochemistry of rock samples from the National Geochemical Database: U.S. Geological Survey, Reston, VA.	U.S. Geological Survey	USGS		39.8833	-113.883	0.01	67	67	67	UNKNOWN	SEDIMENTARY	UNKNOWN	UNKNOWN	LIMESTONE		3.6	0.02	0.46		0.33		0.06			4.8	49		3.8	0.25										0.15	29	2.1	2.5
D115750		USGS		Geochemistry of rock samples from the National Geochemical Database: U.S. Geological Survey, Reston, VA.	U.S. Geological Survey	USGS		37.25	-115.25	0.01	67	67	67	MISC	SEDIMENTARY	UNKNOWN	UNKNOWN	LIMESTONE																		47.3
D115750		USGS		Geochemistry of rock samples from the National Geochemical Database: U.S. Geological Survey, Reston, VA.	U.S. Geological Survey	USGS		37.25	-115.25	0.01	67	67	67	UNKNOWN	SEDIMENTARY	UNKNOWN	UNKNOWN	LIMESTONE		0.3	0.01	0.1				0.04		0.01	21.1	32.1		0.1	0.1											52					84
D115751		USGS		Geochemistry of rock samples from the National Geochemical Database: U.S. Geological Survey, Reston, VA.	U.S. Geological Survey	USGS		39.1333	-114.5	0.01	69	68	67	MISC	SEDIMENTARY	UNKNOWN	UNKNOWN	LIMESTONE																		37.9
D115751		USGS		Geochemistry of rock samples from the National Geochemical Database: U.S. Geological Survey, Reston, VA.	U.S. Geological Survey	USGS		39.1333	-114.5	0.01	69	68	67	UNKNOWN	SEDIMENTARY	UNKNOWN	UNKNOWN	LIMESTONE		8.3	0.06	0.7				0.1		0.01	1.1	49.2			0.21	0.2									0.37	330			0.67
D115752		USGS		Geochemistry of rock samples from the National Geochemical Database: U.S. Geological Survey, Reston, VA.	U.S. Geological Survey	USGS		38.8833	-104.883	0.01	69	69	69	MISC	SEDIMENTARY	UNKNOWN	UNKNOWN	LIMESTONE																		41.8
D115752		USGS		Geochemistry of rock samples from the National Geochemical Database: U.S. Geological Survey, Reston, VA.	U.S. Geological Survey	USGS		38.8833	-104.883	0.01	69	69	69	UNKNOWN	SEDIMENTARY	UNKNOWN	UNKNOWN	LIMESTONE		5.8	0.07	1.4				0.38		0.05	11.3	36.2			0.86	0.04									0.98	750			7
D115753		USGS		Geochemistry of rock samples from the National Geochemical Database: U.S. Geological Survey, Reston, VA.	U.S. Geological Survey	USGS		39.5	-107.383	0.01	67	67	67	MISC	SEDIMENTARY	UNKNOWN	UNKNOWN	LIMESTONE																		38.4
D115753		USGS		Geochemistry of rock samples from the National Geochemical Database: U.S. Geological Survey, Reston, VA.	U.S. Geological Survey	USGS		39.5	-107.383	0.01	67	67	67	UNKNOWN	SEDIMENTARY	UNKNOWN	UNKNOWN	LIMESTONE		10.3	0.09	3.2		1.2		0.82		0.07	16.1	26.3		0.15	1.6	0.07									1.2	400	5.4	6.8	3.1		38
D115754		USGS		Geochemistry of rock samples from the National Geochemical Database: U.S. Geological Survey, Reston, VA.	U.S. Geological Survey	USGS		44	-103.25	0.01	69	68	67	MISC	SEDIMENTARY	UNKNOWN	UNKNOWN	LIMESTONE																		37.4
D115754		USGS		Geochemistry of rock samples from the National Geochemical Database: U.S. Geological Survey, Reston, VA.	U.S. Geological Survey	USGS		44	-103.25	0.01	69	68	67	UNKNOWN	SEDIMENTARY	UNKNOWN	UNKNOWN	LIMESTONE		8.6	0.03	1.4		1.9		1.1		0.54	4.7	41.8			0.7	0.35									1.7	3700	8.6	11	15		48
D115755		USGS		Geochemistry of rock samples from the National Geochemical Database: U.S. Geological Survey, Reston, VA.	U.S. Geological Survey	USGS		40.5	-111.5	0.01	67	67	67	UNKNOWN	SEDIMENTARY	UNKNOWN	UNKNOWN	LIMESTONE																									1.8	540		5	7
D115756		USGS		Geochemistry of rock samples from the National Geochemical Database: U.S. Geological Survey, Reston, VA.	U.S. Geological Survey	USGS		44.5	-107	0.01	67	67	67	MISC	SEDIMENTARY	UNKNOWN	UNKNOWN	LIMESTONE																		38.6
D115756		USGS		Geochemistry of rock samples from the National Geochemical Database: U.S. Geological Survey, Reston, VA.	U.S. Geological Survey	USGS		44.5	-107	0.01	67	67	67	UNKNOWN	SEDIMENTARY	UNKNOWN	UNKNOWN	LIMESTONE		9.1	0.04	1		0.9		0.18		0.03	0.56	48.4		0.06	0.59	0.19									0.76	760	7.3	12	39		47
D115757		USGS		Geochemistry of rock samples from the National Geochemical Database: U.S. Geological Survey, Reston, VA.	U.S. Geological Survey	USGS		47.1333	-112.5	0.01	67	67	67	MISC	SEDIMENTARY	UNKNOWN	UNKNOWN	LIMESTONE																		46.8
D115804		USGS		Geochemistry of rock samples from the National Geochemical Database: U.S. Geological Survey, Reston, VA.	U.S. Geological Survey	USGS		38.8833	-104.883	0.01	69	69	69	MISC	SEDIMENTARY	UNKNOWN	UNKNOWN	LIMESTONE																		40.4
D115757		USGS		Geochemistry of rock samples from the National Geochemical Database: U.S. Geological Survey, Reston, VA.	U.S. Geological Survey	USGS		47.1333	-112.5	0.01	67	67	67	UNKNOWN	SEDIMENTARY	UNKNOWN	UNKNOWN	LIMESTONE		0.12		0.09		0.1		0.04			21.5	30.2		0.06	0.05										0.073	65		2.6	1.4		74
D115758		USGS		Geochemistry of rock samples from the National Geochemical Database: U.S. Geological Survey, Reston, VA.	U.S. Geological Survey	USGS		34.5	-115.5	0.01	67	67	67	UNKNOWN	SEDIMENTARY	UNKNOWN	UNKNOWN	LIMESTONE																									5.3	1300	30	10	7
D115759		USGS		Geochemistry of rock samples from the National Geochemical Database: U.S. Geological Survey, Reston, VA.	U.S. Geological Survey	USGS		45.75	-111.633	0.01	67	67	67	MISC	SEDIMENTARY	UNKNOWN	UNKNOWN	LIMESTONE																		45.7
D115759		USGS		Geochemistry of rock samples from the National Geochemical Database: U.S. Geological Survey, Reston, VA.	U.S. Geological Survey	USGS		45.75	-111.633	0.01	67	67	67	UNKNOWN	SEDIMENTARY	UNKNOWN	UNKNOWN	LIMESTONE		0.9	0.03	0.6		0.29		0.06		0.02	21.3	32.2			0.28										0.33	170	3.2	2.9	4.9		54
D115761		USGS		Geochemistry of rock samples from the National Geochemical Database: U.S. Geological Survey, Reston, VA.	U.S. Geological Survey	USGS		44.5	-107	0.01	67	67	67	MISC	SEDIMENTARY	UNKNOWN	UNKNOWN	LIMESTONE																		31
D115761		USGS		Geochemistry of rock samples from the National Geochemical Database: U.S. Geological Survey, Reston, VA.	U.S. Geological Survey	USGS		44.5	-107	0.01	67	67	67	UNKNOWN	SEDIMENTARY	UNKNOWN	UNKNOWN	LIMESTONE		22.8	0.09	2.7		1.4		0.02		0.07	1.1	40.9			1.7	0.34									1.1	600		5.4	2		96
D115762		USGS		Geochemistry of rock samples from the National Geochemical Database: U.S. Geological Survey, Reston, VA.	U.S. Geological Survey	USGS		32.8833	-107.25	0.01	69	69	69	MISC	SEDIMENTARY	UNKNOWN	UNKNOWN	LIMESTONE																		33.5
D115762		USGS		Geochemistry of rock samples from the National Geochemical Database: U.S. Geological Survey, Reston, VA.	U.S. Geological Survey	USGS		32.8833	-107.25	0.01	69	69	69	UNKNOWN	SEDIMENTARY	UNKNOWN	UNKNOWN	LIMESTONE		22.7	0.04	0.75		0.37		0.4		0.01	0.6	43			0.33										0.15	410	2.9				75
D115765		USGS		Geochemistry of rock samples from the National Geochemical Database: U.S. Geological Survey, Reston, VA.	U.S. Geological Survey	USGS		31.6333	-110	0.01	69	68	67	MISC	SEDIMENTARY	UNKNOWN	UNKNOWN	LIMESTONE																		20.2
D115765		USGS		Geochemistry of rock samples from the National Geochemical Database: U.S. Geological Survey, Reston, VA.	U.S. Geological Survey	USGS		31.6333	-110	0.01	69	68	67	UNKNOWN	SEDIMENTARY	UNKNOWN	UNKNOWN	LIMESTONE		49.3	0.15	0.95		2.7		0.66		0.15	1.7	24.4			0.31	0.21									1.3	590		3.2	0.99
D115766		USGS		Geochemistry of rock samples from the National Geochemical Database: U.S. Geological Survey, Reston, VA.	U.S. Geological Survey	USGS		38.8833	-104.883	0.01	69	69	69	MISC	SEDIMENTARY	UNKNOWN	UNKNOWN	LIMESTONE																		40.8
D115766		USGS		Geochemistry of rock samples from the National Geochemical Database: U.S. Geological Survey, Reston, VA.	U.S. Geological Survey	USGS		38.8833	-104.883	0.01	69	69	69	UNKNOWN	SEDIMENTARY	UNKNOWN	UNKNOWN	LIMESTONE		7.1	0.07	1.4		0.6		0.42		0.05	11.7	37.2			0.83	0.04									0.93	740			7
D115767		USGS		Geochemistry of rock samples from the National Geochemical Database: U.S. Geological Survey, Reston, VA.	U.S. Geological Survey	USGS		31.5	-110.383	0.01	69	68	67	MISC	SEDIMENTARY	UNKNOWN	UNKNOWN	LIMESTONE																		17.6
D115767		USGS		Geochemistry of rock samples from the National Geochemical Database: U.S. Geological Survey, Reston, VA.	U.S. Geological Survey	USGS		31.5	-110.383	0.01	69	68	67	UNKNOWN	SEDIMENTARY	UNKNOWN	UNKNOWN	LIMESTONE		42.9	0.65	8.7		2.6		0.62		0.06	2	21.4		0.12	4.6	0.14									1.2	450	9.4	11	15		67
D115768		USGS		Geochemistry of rock samples from the National Geochemical Database: U.S. Geological Survey, Reston, VA.	U.S. Geological Survey	USGS		39.1333	-114.5	0.01	67	67	67	MISC	SEDIMENTARY	UNKNOWN	UNKNOWN	LIMESTONE																		41.6
D115768		USGS		Geochemistry of rock samples from the National Geochemical Database: U.S. Geological Survey, Reston, VA.	U.S. Geological Survey	USGS		39.1333	-114.5	0.01	67	67	67	UNKNOWN	SEDIMENTARY	UNKNOWN	UNKNOWN	LIMESTONE		2.5	0.01	0.3		0.21		0.06		0.01	1.1	51.9			0.14	0.2									0.045	68		3.1			40
D115769		USGS		Geochemistry of rock samples from the National Geochemical Database: U.S. Geological Survey, Reston, VA.	U.S. Geological Survey	USGS		41.6333	-111.5	0.01	67	67	67	MISC	SEDIMENTARY	UNKNOWN	UNKNOWN	LIMESTONE																		41.6
D115769		USGS		Geochemistry of rock samples from the National Geochemical Database: U.S. Geological Survey, Reston, VA.	U.S. Geological Survey	USGS		41.6333	-111.5	0.01	67	67	67	UNKNOWN	SEDIMENTARY	UNKNOWN	UNKNOWN	LIMESTONE		2.8	0.05	1.3		0.33		0.22		0.01	2	48.9			0.57										0.36	49	2.9	2.7	1.3		75
D115771		USGS		Geochemistry of rock samples from the National Geochemical Database: U.S. Geological Survey, Reston, VA.	U.S. Geological Survey	USGS		32.75	-107.883	0.01	69	69	69	MISC	SEDIMENTARY	UNKNOWN	UNKNOWN	LIMESTONE																		38.4
D115771		USGS		Geochemistry of rock samples from the National Geochemical Database: U.S. Geological Survey, Reston, VA.	U.S. Geological Survey	USGS		32.75	-107.883	0.01	69	69	69	UNKNOWN	SEDIMENTARY	UNKNOWN	UNKNOWN	LIMESTONE		8.6	0.03	0.4		0.36		0.06		0.01	1	49.9			0.26										0.19	86			0.65
D115772		USGS		Geochemistry of rock samples from the National Geochemical Database: U.S. Geological Survey, Reston, VA.	U.S. Geological Survey	USGS		43.3833	-108.133	0.01	67	67	67	MISC	SEDIMENTARY	UNKNOWN	UNKNOWN	LIMESTONE																		42.7
D115772		USGS		Geochemistry of rock samples from the National Geochemical Database: U.S. Geological Survey, Reston, VA.	U.S. Geological Survey	USGS		43.3833	-108.133	0.01	67	67	67	UNKNOWN	SEDIMENTARY	UNKNOWN	UNKNOWN	LIMESTONE		1.6	0.02	0.7		0.28		0.14		0.01	1.1	52.6			0.36	0.03									0.22	250		1.9	0.56
D115774		USGS		Geochemistry of rock samples from the National Geochemical Database: U.S. Geological Survey, Reston, VA.	U.S. Geological Survey	USGS		38.8833	-104.883	0.01	69	69	69	MISC	SEDIMENTARY	UNKNOWN	UNKNOWN	LIMESTONE																		41.1
D115774		USGS		Geochemistry of rock samples from the National Geochemical Database: U.S. Geological Survey, Reston, VA.	U.S. Geological Survey	USGS		38.8833	-104.883	0.01	69	69	69	UNKNOWN	SEDIMENTARY	UNKNOWN	UNKNOWN	LIMESTONE		6.1	0.07	1.1		0.68		0.42		0.05	11.9	36.1			0.86	0.04									1	200			10
D115775		USGS		Geochemistry of rock samples from the National Geochemical Database: U.S. Geological Survey, Reston, VA.	U.S. Geological Survey	USGS		43	-112.133	0.01	69	68	67	MISC	SEDIMENTARY	UNKNOWN	UNKNOWN	LIMESTONE																		41.2
D115775		USGS		Geochemistry of rock samples from the National Geochemical Database: U.S. Geological Survey, Reston, VA.	U.S. Geological Survey	USGS		43	-112.133	0.01	69	68	67	UNKNOWN	SEDIMENTARY	UNKNOWN	UNKNOWN	LIMESTONE		3.6	0.05	1.3		0.3		0.14		0.01	1.3	50			0.55	0.14									0.23	270		3.2	1
D115777		USGS		Geochemistry of rock samples from the National Geochemical Database: U.S. Geological Survey, Reston, VA.	U.S. Geological Survey	USGS		36.75	-115.25	0.01	67	67	67	MISC	SEDIMENTARY	UNKNOWN	UNKNOWN	LIMESTONE																		43.4
D115777		USGS		Geochemistry of rock samples from the National Geochemical Database: U.S. Geological Survey, Reston, VA.	U.S. Geological Survey	USGS		36.75	-115.25	0.01	67	67	67	UNKNOWN	SEDIMENTARY	UNKNOWN	UNKNOWN	LIMESTONE		3.7		0.7		0.23		0.02			1.2	55.2		1.4	0.08											15		3.2
D115778		USGS		Geochemistry of rock samples from the National Geochemical Database: U.S. Geological Survey, Reston, VA.	U.S. Geological Survey	USGS		43.3833	-108.133	0.01	67	67	67	MISC	SEDIMENTARY	UNKNOWN	UNKNOWN	LIMESTONE																		38.1
D115778		USGS		Geochemistry of rock samples from the National Geochemical Database: U.S. Geological Survey, Reston, VA.	U.S. Geological Survey	USGS		43.3833	-108.133	0.01	67	67	67	UNKNOWN	SEDIMENTARY	UNKNOWN	UNKNOWN	LIMESTONE		5.8	0.05	0.7		1.5		0.14		0.01	0.8	48.4		2.2	0.81	0.06									1.3	350	6.1	4.4	2.6		38
D115779		USGS		Geochemistry of rock samples from the National Geochemical Database: U.S. Geological Survey, Reston, VA.	U.S. Geological Survey	USGS		31.3833	-110.217	0.01	69	68	67	MISC	SEDIMENTARY	UNKNOWN	UNKNOWN	LIMESTONE																		32
D115779		USGS		Geochemistry of rock samples from the National Geochemical Database: U.S. Geological Survey, Reston, VA.	U.S. Geological Survey	USGS		31.3833	-110.217	0.01	69	68	67	UNKNOWN	SEDIMENTARY	UNKNOWN	UNKNOWN	LIMESTONE		18.7	0.23	4		1.1		0.48		0.03	1	39.9		2	1.9	0.15									1.1	350	5.9	5.1	2.6		86
D115780		USGS		Geochemistry of rock samples from the National Geochemical Database: U.S. Geological Survey, Reston, VA.	U.S. Geological Survey	USGS		39.25	-112.133	0.01	69	68	67	MISC	SEDIMENTARY	UNKNOWN	UNKNOWN	LIMESTONE																		38.7
D115780		USGS		Geochemistry of rock samples from the National Geochemical Database: U.S. Geological Survey, Reston, VA.	U.S. Geological Survey	USGS		39.25	-112.133	0.01	69	68	67	UNKNOWN	SEDIMENTARY	UNKNOWN	UNKNOWN	LIMESTONE		8.2	0.02	0.6		0.52		0.18		0.01	1.3	50		0.21	0.28	0.05									0.41	220	3.5	2.9	0.75
D115781		USGS		Geochemistry of rock samples from the National Geochemical Database: U.S. Geological Survey, Reston, VA.	U.S. Geological Survey	USGS		31.6333	-110	0.01	69	68	67	UNKNOWN	SEDIMENTARY	UNKNOWN	UNKNOWN	LIMESTONE		4	0.05	0.9		0.58		0.62		0.03	2.3	50.2		1.6	0.47										0.85	460	4.3	4.6	0.9		140
D115782		USGS		Geochemistry of rock samples from the National Geochemical Database: U.S. Geological Survey, Reston, VA.	U.S. Geological Survey	USGS		33	-107.133	0.01	69	69	69	UNKNOWN	SEDIMENTARY	UNKNOWN	UNKNOWN	LIMESTONE																									0.83	750			2
D115783		USGS		Geochemistry of rock samples from the National Geochemical Database: U.S. Geological Survey, Reston, VA.	U.S. Geological Survey	USGS		38.8833	-104.883	0.01	69	69	69	MISC	SEDIMENTARY	UNKNOWN	UNKNOWN	LIMESTONE																		40.8
D115783		USGS		Geochemistry of rock samples from the National Geochemical Database: U.S. Geological Survey, Reston, VA.	U.S. Geological Survey	USGS		38.8833	-104.883	0.01	69	69	69	UNKNOWN	SEDIMENTARY	UNKNOWN	UNKNOWN	LIMESTONE		7.6	0.06	1.3		0.55		0.4		0.05	10.6	37.4		1.6	0.5	0.03									1.1	100			7
D115797		USGS		Geochemistry of rock samples from the National Geochemical Database: U.S. Geological Survey, Reston, VA.	U.S. Geological Survey	USGS		44	-103.25	0.01	69	68	67	MISC	SEDIMENTARY	UNKNOWN	UNKNOWN	LIMESTONE																		33.4
D115785		USGS		Geochemistry of rock samples from the National Geochemical Database: U.S. Geological Survey, Reston, VA.	U.S. Geological Survey	USGS		38.8833	-104.883	0.01	69	69	69	MISC	SEDIMENTARY	UNKNOWN	UNKNOWN	LIMESTONE																		40.4
D115785		USGS		Geochemistry of rock samples from the National Geochemical Database: U.S. Geological Survey, Reston, VA.	U.S. Geological Survey	USGS		38.8833	-104.883	0.01	69	69	69	UNKNOWN	SEDIMENTARY	UNKNOWN	UNKNOWN	LIMESTONE		6.4	0.05	1.3		0.37		0.38		0.05	12	37		2	0.57	0.03									1.1	100			5
D115786		USGS		Geochemistry of rock samples from the National Geochemical Database: U.S. Geological Survey, Reston, VA.	U.S. Geological Survey	USGS		39.3833	-115.883	0.01	67	67	67	MISC	SEDIMENTARY	UNKNOWN	UNKNOWN	LIMESTONE																		42.9
D115786		USGS		Geochemistry of rock samples from the National Geochemical Database: U.S. Geological Survey, Reston, VA.	U.S. Geological Survey	USGS		39.3833	-115.883	0.01	67	67	67	UNKNOWN	SEDIMENTARY	UNKNOWN	UNKNOWN	LIMESTONE		2.9		0.3		0.24		0.04			0.59	53.4		0.34	0.13											100		2
D115788		USGS		Geochemistry of rock samples from the National Geochemical Database: U.S. Geological Survey, Reston, VA.	U.S. Geological Survey	USGS		47.8833	-108.5	0.01	69	68	67	MISC	SEDIMENTARY	UNKNOWN	UNKNOWN	LIMESTONE																		47
D115788		USGS		Geochemistry of rock samples from the National Geochemical Database: U.S. Geological Survey, Reston, VA.	U.S. Geological Survey	USGS		47.8833	-108.5	0.01	69	68	67	UNKNOWN	SEDIMENTARY	UNKNOWN	UNKNOWN	LIMESTONE		0.22	0.07	0.22		0.04		0.14		0.02	21.2	30.5		0.08	0.04	0.05									0.18	160
D115789		USGS		Geochemistry of rock samples from the National Geochemical Database: U.S. Geological Survey, Reston, VA.	U.S. Geological Survey	USGS		38.8833	-104.883	0.01	69	69	69	MISC	SEDIMENTARY	UNKNOWN	UNKNOWN	LIMESTONE																		40.8
D115789		USGS		Geochemistry of rock samples from the National Geochemical Database: U.S. Geological Survey, Reston, VA.	U.S. Geological Survey	USGS		38.8833	-104.883	0.01	69	69	69	UNKNOWN	SEDIMENTARY	UNKNOWN	UNKNOWN	LIMESTONE		6.3	0.05	0.9		0.52		0.38		0.07	12.6	36.3		2.5	0.88	0.04									1.1	100			5
D115790		USGS		Geochemistry of rock samples from the National Geochemical Database: U.S. Geological Survey, Reston, VA.	U.S. Geological Survey	USGS		38.8833	-104.883	0.01	69	69	69	MISC	SEDIMENTARY	UNKNOWN	UNKNOWN	LIMESTONE																		40.8
D115790		USGS		Geochemistry of rock samples from the National Geochemical Database: U.S. Geological Survey, Reston, VA.	U.S. Geological Survey	USGS		38.8833	-104.883	0.01	69	69	69	UNKNOWN	SEDIMENTARY	UNKNOWN	UNKNOWN	LIMESTONE		6.7	0.05	1.3		0.52		0.38		0.05	12	36.2			0.88	0.03									1	780			5
D115791		USGS		Geochemistry of rock samples from the National Geochemical Database: U.S. Geological Survey, Reston, VA.	U.S. Geological Survey	USGS		39.8833	-113.75	0.01	67	67	67	MISC	SEDIMENTARY	UNKNOWN	UNKNOWN	LIMESTONE																		14.3
D115791		USGS		Geochemistry of rock samples from the National Geochemical Database: U.S. Geological Survey, Reston, VA.	U.S. Geological Survey	USGS		39.8833	-113.75	0.01	67	67	67	UNKNOWN	SEDIMENTARY	UNKNOWN	UNKNOWN	LIMESTONE		44.3	0.46	13.6		1.9		0.22		0.03	2.3	14		3.7	4.6	0.09									1.6	270	27	13	30		66
D115792		USGS		Geochemistry of rock samples from the National Geochemical Database: U.S. Geological Survey, Reston, VA.	U.S. Geological Survey	USGS		38.8833	-104.883	0.01	69	69	69	MISC	SEDIMENTARY	UNKNOWN	UNKNOWN	LIMESTONE																		40.4
D115792		USGS		Geochemistry of rock samples from the National Geochemical Database: U.S. Geological Survey, Reston, VA.	U.S. Geological Survey	USGS		38.8833	-104.883	0.01	69	69	69	UNKNOWN	SEDIMENTARY	UNKNOWN	UNKNOWN	LIMESTONE		8.4	0.05	1.5		0.39		0.42		0.05	12.1	34.8		2.4	0.91	0.03									1.1				5
D115795		USGS		Geochemistry of rock samples from the National Geochemical Database: U.S. Geological Survey, Reston, VA.	U.S. Geological Survey	USGS		37.25	-115.633	0.01	67	67	67	MISC	SEDIMENTARY	UNKNOWN	UNKNOWN	LIMESTONE																		40.2
D115795		USGS		Geochemistry of rock samples from the National Geochemical Database: U.S. Geological Survey, Reston, VA.	U.S. Geological Survey	USGS		37.25	-115.633	0.01	67	67	67	UNKNOWN	SEDIMENTARY	UNKNOWN	UNKNOWN	LIMESTONE		5.6	0.03	2.1		0.86		0.22			1.1	45.6		2.1	0.48	0.06									0.54	240	3.9	4	3.1		86
D115797		USGS		Geochemistry of rock samples from the National Geochemical Database: U.S. Geological Survey, Reston, VA.	U.S. Geological Survey	USGS		44	-103.25	0.01	69	68	67	UNKNOWN	SEDIMENTARY	UNKNOWN	UNKNOWN	LIMESTONE		16.2	0.1	3.5		1.9		0.34		0.18	2.1	38.9		0.1	2	0.76									0.99	930	5.6	6.2	1.5		36
D115798		USGS		Geochemistry of rock samples from the National Geochemical Database: U.S. Geological Survey, Reston, VA.	U.S. Geological Survey	USGS		33	-107.133	0.01	69	69	69	MISC	SEDIMENTARY	UNKNOWN	UNKNOWN	LIMESTONE																		41
D115798		USGS		Geochemistry of rock samples from the National Geochemical Database: U.S. Geological Survey, Reston, VA.	U.S. Geological Survey	USGS		33	-107.133	0.01	69	69	69	UNKNOWN	SEDIMENTARY	UNKNOWN	UNKNOWN	LIMESTONE		7.2	0.07	0.95		0.58		0.62		0.17	15.5	31		2.5	0.56	0.04									0.47	510			0.73		68
D115799		USGS		Geochemistry of rock samples from the National Geochemical Database: U.S. Geological Survey, Reston, VA.	U.S. Geological Survey	USGS		38.8833	-104.883	0.01	69	69	69	MISC	SEDIMENTARY	UNKNOWN	UNKNOWN	LIMESTONE																		40.9
D115799		USGS		Geochemistry of rock samples from the National Geochemical Database: U.S. Geological Survey, Reston, VA.	U.S. Geological Survey	USGS		38.8833	-104.883	0.01	69	69	69	UNKNOWN	SEDIMENTARY	UNKNOWN	UNKNOWN	LIMESTONE		7.3	0.05	0.95		0.55		0.4		0.06	12.6	36.4		0.1	0.87	0.03									1.1	300			5
D115800		USGS		Geochemistry of rock samples from the National Geochemical Database: U.S. Geological Survey, Reston, VA.	U.S. Geological Survey	USGS		38.8833	-104.883	0.01	69	69	69	MISC	SEDIMENTARY	UNKNOWN	UNKNOWN	LIMESTONE																		40.9
D115800		USGS		Geochemistry of rock samples from the National Geochemical Database: U.S. Geological Survey, Reston, VA.	U.S. Geological Survey	USGS		38.8833	-104.883	0.01	69	69	69	UNKNOWN	SEDIMENTARY	UNKNOWN	UNKNOWN	LIMESTONE		6.7	0.05	1		0.6		0.4		0.05	11.9	36.7			0.88	0.06									1	200		3	7
D115801		USGS		Geochemistry of rock samples from the National Geochemical Database: U.S. Geological Survey, Reston, VA.	U.S. Geological Survey	USGS		32.75	-107.883	0.01	69	69	69	MISC	SEDIMENTARY	UNKNOWN	UNKNOWN	LIMESTONE																		37
D115801		USGS		Geochemistry of rock samples from the National Geochemical Database: U.S. Geological Survey, Reston, VA.	U.S. Geological Survey	USGS		32.75	-107.883	0.01	69	69	69	UNKNOWN	SEDIMENTARY	UNKNOWN	UNKNOWN	LIMESTONE		13	0.01	0.2		0.42		0.08		0.01	0.95	49.5			0.26										0.15	55		2.1	0.73		48
D115802		USGS		Geochemistry of rock samples from the National Geochemical Database: U.S. Geological Survey, Reston, VA.	U.S. Geological Survey	USGS		38.8833	-104.883	0.01	69	69	69	MISC	SEDIMENTARY	UNKNOWN	UNKNOWN	LIMESTONE																		40.8
D115802		USGS		Geochemistry of rock samples from the National Geochemical Database: U.S. Geological Survey, Reston, VA.	U.S. Geological Survey	USGS		38.8833	-104.883	0.01	69	69	69	UNKNOWN	SEDIMENTARY	UNKNOWN	UNKNOWN	LIMESTONE		6.8	0.05	1.6		0.59		0.36		0.06	12.1	35.3			0.83	0.04									1	400			10
D115803		USGS		Geochemistry of rock samples from the National Geochemical Database: U.S. Geological Survey, Reston, VA.	U.S. Geological Survey	USGS		44.1333	-103.383	0.01	69	68	67	UNKNOWN	SEDIMENTARY	UNKNOWN	UNKNOWN	LIMESTONE																									4.2	900		5	2
D115804		USGS		Geochemistry of rock samples from the National Geochemical Database: U.S. Geological Survey, Reston, VA.	U.S. Geological Survey	USGS		38.8833	-104.883	0.01	69	69	69	UNKNOWN	SEDIMENTARY	UNKNOWN	UNKNOWN	LIMESTONE		6.4	0.05	0.8		0.55		0.4		0.05	12.3	35.9			0.83	0.05									0.99	730			5
D115805		USGS		Geochemistry of rock samples from the National Geochemical Database: U.S. Geological Survey, Reston, VA.	U.S. Geological Survey	USGS		39.1333	-114.5	0.01	69	68	67	MISC	SEDIMENTARY	UNKNOWN	UNKNOWN	LIMESTONE																		37.7
D115805		USGS		Geochemistry of rock samples from the National Geochemical Database: U.S. Geological Survey, Reston, VA.	U.S. Geological Survey	USGS		39.1333	-114.5	0.01	69	68	67	UNKNOWN	SEDIMENTARY	UNKNOWN	UNKNOWN	LIMESTONE		8	0.01	0.6		0.4		0.1		0.05	1.4	50.5			0.26	0.29									0.16	390			2.1
D115806		USGS		Geochemistry of rock samples from the National Geochemical Database: U.S. Geological Survey, Reston, VA.	U.S. Geological Survey	USGS		38.8833	-104.883	0.01	69	69	69	MISC	SEDIMENTARY	UNKNOWN	UNKNOWN	LIMESTONE																		40.4
D115806		USGS		Geochemistry of rock samples from the National Geochemical Database: U.S. Geological Survey, Reston, VA.	U.S. Geological Survey	USGS		38.8833	-104.883	0.01	69	69	69	UNKNOWN	SEDIMENTARY	UNKNOWN	UNKNOWN	LIMESTONE		7.2	0.05	1.1		0.6		0.38		0.05	11.2	35.9			0.88	0.04									1.1	400			7
D115807		USGS		Geochemistry of rock samples from the National Geochemical Database: U.S. Geological Survey, Reston, VA.	U.S. Geological Survey	USGS		45.8833	-111.25	0.01	67	67	67	MISC	SEDIMENTARY	UNKNOWN	UNKNOWN	LIMESTONE																		43.1
D115807		USGS		Geochemistry of rock samples from the National Geochemical Database: U.S. Geological Survey, Reston, VA.	U.S. Geological Survey	USGS		45.8833	-111.25	0.01	67	67	67	UNKNOWN	SEDIMENTARY	UNKNOWN	UNKNOWN	LIMESTONE		1.6		0.56		0.31		0.1			0.57	54.4			0.24	0.06									0.18	170		2.7	0.87
D115808		USGS		Geochemistry of rock samples from the National Geochemical Database: U.S. Geological Survey, Reston, VA.	U.S. Geological Survey	USGS		36	-111.883	0.01	67	67	67	MISC	SEDIMENTARY	UNKNOWN	UNKNOWN	LIMESTONE																		16.7
D115808		USGS		Geochemistry of rock samples from the National Geochemical Database: U.S. Geological Survey, Reston, VA.	U.S. Geological Survey	USGS		36	-111.883	0.01	67	67	67	UNKNOWN	SEDIMENTARY	UNKNOWN	UNKNOWN	LIMESTONE		48.1	0.31	7.1		1.2		0.42		0.04	0.25	20.3		0.22	5	0.08									1.1	270	6.5	6	82		73
D115809		USGS		Geochemistry of rock samples from the National Geochemical Database: U.S. Geological Survey, Reston, VA.	U.S. Geological Survey	USGS		38.8833	-104.883	0.01	69	69	69	MISC	SEDIMENTARY	UNKNOWN	UNKNOWN	LIMESTONE																		40.5
D115809		USGS		Geochemistry of rock samples from the National Geochemical Database: U.S. Geological Survey, Reston, VA.	U.S. Geological Survey	USGS		38.8833	-104.883	0.01	69	69	69	UNKNOWN	SEDIMENTARY	UNKNOWN	UNKNOWN	LIMESTONE		7	0.05	0.9		0.6		0.38		0.05	11.6	35.9			0.83	0.04									1.1	400			5
D115810		USGS		Geochemistry of rock samples from the National Geochemical Database: U.S. Geological Survey, Reston, VA.	U.S. Geological Survey	USGS		38.6333	-106.383	0.01	69	69	69	MISC	SEDIMENTARY	UNKNOWN	UNKNOWN	LIMESTONE																		44.7
D115810		USGS		Geochemistry of rock samples from the National Geochemical Database: U.S. Geological Survey, Reston, VA.	U.S. Geological Survey	USGS		38.6333	-106.383	0.01	69	69	69	UNKNOWN	SEDIMENTARY	UNKNOWN	UNKNOWN	LIMESTONE		1.1	0.01	0.2		0.01		0.14		0.04	21.5	30.8			0.15	0.01									0.17	180	3.3		1.6		84
D115811		USGS		Geochemistry of rock samples from the National Geochemical Database: U.S. Geological Survey, Reston, VA.	U.S. Geological Survey	USGS		38.8833	-104.883	0.01	69	69	69	MISC	SEDIMENTARY	UNKNOWN	UNKNOWN	LIMESTONE																		40.8
D115811		USGS		Geochemistry of rock samples from the National Geochemical Database: U.S. Geological Survey, Reston, VA.	U.S. Geological Survey	USGS		38.8833	-104.883	0.01	69	69	69	UNKNOWN	SEDIMENTARY	UNKNOWN	UNKNOWN	LIMESTONE		7.1	0.06	1.2		0.62		0.42		0.06	12.4	34.5			0.83	0.05									1	760			5
D115812		USGS		Geochemistry of rock samples from the National Geochemical Database: U.S. Geological Survey, Reston, VA.	U.S. Geological Survey	USGS		38.8833	-104.883	0.01	69	69	69	MISC	SEDIMENTARY	UNKNOWN	UNKNOWN	LIMESTONE																		40.8
D115812		USGS		Geochemistry of rock samples from the National Geochemical Database: U.S. Geological Survey, Reston, VA.	U.S. Geological Survey	USGS		38.8833	-104.883	0.01	69	69	69	UNKNOWN	SEDIMENTARY	UNKNOWN	UNKNOWN	LIMESTONE		8	0.06	0.8		0.6		0.4		0.06	12.1	35.5			0.83	0.05									1	720			5
D115813		USGS		Geochemistry of rock samples from the National Geochemical Database: U.S. Geological Survey, Reston, VA.	U.S. Geological Survey	USGS		38.8833	-104.883	0.01	69	69	69	MISC	SEDIMENTARY	UNKNOWN	UNKNOWN	LIMESTONE																		40.9
D115813		USGS		Geochemistry of rock samples from the National Geochemical Database: U.S. Geological Survey, Reston, VA.	U.S. Geological Survey	USGS		38.8833	-104.883	0.01	69	69	69	UNKNOWN	SEDIMENTARY	UNKNOWN	UNKNOWN	LIMESTONE		6.6	0.07	1.1		0.6		0.42		0.06	11.9	35.4			0.83	0.05									1	750			5
D115814		USGS		Geochemistry of rock samples from the National Geochemical Database: U.S. Geological Survey, Reston, VA.	U.S. Geological Survey	USGS		43.3833	-108.133	0.01	67	67	67	MISC	SEDIMENTARY	UNKNOWN	UNKNOWN	LIMESTONE																		36.1
D115814		USGS		Geochemistry of rock samples from the National Geochemical Database: U.S. Geological Survey, Reston, VA.	U.S. Geological Survey	USGS		43.3833	-108.133	0.01	67	67	67	UNKNOWN	SEDIMENTARY	UNKNOWN	UNKNOWN	LIMESTONE		10.5	0.07	1.3		1		1.2		0.13	4.7	41.7			1.2	0.05									1	600			1
D115815		USGS		Geochemistry of rock samples from the National Geochemical Database: U.S. Geological Survey, Reston, VA.	U.S. Geological Survey	USGS		40.1333	-111.5	0.01	67	67	67	MISC	SEDIMENTARY	UNKNOWN	UNKNOWN	LIMESTONE																		41.6
D115815		USGS		Geochemistry of rock samples from the National Geochemical Database: U.S. Geological Survey, Reston, VA.	U.S. Geological Survey	USGS		40.1333	-111.5	0.01	67	67	67	UNKNOWN	SEDIMENTARY	UNKNOWN	UNKNOWN	LIMESTONE		2.5	0.05	1.3		0.42		0.18		0.01	1.5	50.4			0.62	0.02									0.35	190	4.8	3.3	1.7		40
D115837		USGS		Geochemistry of rock samples from the National Geochemical Database: U.S. Geological Survey, Reston, VA.	U.S. Geological Survey	USGS		36.75	-115.25	0.01	67	67	67	MISC	SEDIMENTARY	UNKNOWN	UNKNOWN	LIMESTONE																		43.7
D115816		USGS		Geochemistry of rock samples from the National Geochemical Database: U.S. Geological Survey, Reston, VA.	U.S. Geological Survey	USGS		34.5	-115.5	0.01	67	67	67	UNKNOWN	SEDIMENTARY	UNKNOWN	UNKNOWN	LIMESTONE																									5.4	1300	30	10	30
D115817		USGS		Geochemistry of rock samples from the National Geochemical Database: U.S. Geological Survey, Reston, VA.	U.S. Geological Survey	USGS		37.25	-115.633	0.01	69	69	69	MISC	SEDIMENTARY	UNKNOWN	UNKNOWN	LIMESTONE																		32.4
D115817		USGS		Geochemistry of rock samples from the National Geochemical Database: U.S. Geological Survey, Reston, VA.	U.S. Geological Survey	USGS		37.25	-115.633	0.01	69	69	69	UNKNOWN	SEDIMENTARY	UNKNOWN	UNKNOWN	LIMESTONE		23	0.05	1.8		0.32		0.1			0.5	42		0.22	0.75	0.09									0.16	170			0.64
D115819		USGS		Geochemistry of rock samples from the National Geochemical Database: U.S. Geological Survey, Reston, VA.	U.S. Geological Survey	USGS		31.6333	-110	0.01	69	68	67	MISC	SEDIMENTARY	UNKNOWN	UNKNOWN	LIMESTONE																		19.5
D115819		USGS		Geochemistry of rock samples from the National Geochemical Database: U.S. Geological Survey, Reston, VA.	U.S. Geological Survey	USGS		31.6333	-110	0.01	69	68	67	UNKNOWN	SEDIMENTARY	UNKNOWN	UNKNOWN	LIMESTONE		51.4	0.17	0.9		2.5		0.7		0.14	1.3	23.7			0.26	0.21									1	470		3.5	1.2		45
D115820		USGS		Geochemistry of rock samples from the National Geochemical Database: U.S. Geological Survey, Reston, VA.	U.S. Geological Survey	USGS		31.6333	-110	0.01	69	68	67	MISC	SEDIMENTARY	UNKNOWN	UNKNOWN	LIMESTONE																		31.7
D115820		USGS		Geochemistry of rock samples from the National Geochemical Database: U.S. Geological Survey, Reston, VA.	U.S. Geological Survey	USGS		31.6333	-110	0.01	69	68	67	UNKNOWN	SEDIMENTARY	UNKNOWN	UNKNOWN	LIMESTONE		21.3	0.2	3.3		0.85		0.7		0.11	1	40.2			1.6	0.16									0.69	510	2.4	4.9	1.9
D115821		USGS		Geochemistry of rock samples from the National Geochemical Database: U.S. Geological Survey, Reston, VA.	U.S. Geological Survey	USGS		38.8833	-104.883	0.01	69	69	69	MISC	SEDIMENTARY	UNKNOWN	UNKNOWN	LIMESTONE																		41
D115821		USGS		Geochemistry of rock samples from the National Geochemical Database: U.S. Geological Survey, Reston, VA.	U.S. Geological Survey	USGS		38.8833	-104.883	0.01	69	69	69	UNKNOWN	SEDIMENTARY	UNKNOWN	UNKNOWN	LIMESTONE		7.1	0.06	1.2		0.5		0.4		0.05	11.9	36.5			0.83	0.05									1.1	500			7
D115822		USGS		Geochemistry of rock samples from the National Geochemical Database: U.S. Geological Survey, Reston, VA.	U.S. Geological Survey	USGS		42.5	-107.883	0.01	67	67	67	MISC	SEDIMENTARY	UNKNOWN	UNKNOWN	LIMESTONE																		29.6
D115822		USGS		Geochemistry of rock samples from the National Geochemical Database: U.S. Geological Survey, Reston, VA.	U.S. Geological Survey	USGS		42.5	-107.883	0.01	67	67	67	UNKNOWN	SEDIMENTARY	UNKNOWN	UNKNOWN	LIMESTONE		25.4	0.1	3.6		1.1		0.16		0.09	0.3	35.9			2.2	0.18									0.59	480	2.1	4.6	2.2
D115824		USGS		Geochemistry of rock samples from the National Geochemical Database: U.S. Geological Survey, Reston, VA.	U.S. Geological Survey	USGS		38.8833	-104.883	0.01	69	69	69	MISC	SEDIMENTARY	UNKNOWN	UNKNOWN	LIMESTONE																		41.1
D115824		USGS		Geochemistry of rock samples from the National Geochemical Database: U.S. Geological Survey, Reston, VA.	U.S. Geological Survey	USGS		38.8833	-104.883	0.01	69	69	69	UNKNOWN	SEDIMENTARY	UNKNOWN	UNKNOWN	LIMESTONE		6.3	0.07	1.2		0.6		0.36		0.05	11.5	36.8			0.83	0.05									0.97	740			10
D115825		USGS		Geochemistry of rock samples from the National Geochemical Database: U.S. Geological Survey, Reston, VA.	U.S. Geological Survey	USGS		39.3833	-115.883	0.01	67	67	67	MISC	SEDIMENTARY	UNKNOWN	UNKNOWN	LIMESTONE																		43.7
D115825		USGS		Geochemistry of rock samples from the National Geochemical Database: U.S. Geological Survey, Reston, VA.	U.S. Geological Survey	USGS		39.3833	-115.883	0.01	67	67	67	UNKNOWN	SEDIMENTARY	UNKNOWN	UNKNOWN	LIMESTONE			0.02	0.04				0.07			0.85	54.8		0.08	0.06											41			0.47
D115826		USGS		Geochemistry of rock samples from the National Geochemical Database: U.S. Geological Survey, Reston, VA.	U.S. Geological Survey	USGS		36	-111.883	0.01	67	67	67	MISC	SEDIMENTARY	UNKNOWN	UNKNOWN	LIMESTONE																		29.8
D115826		USGS		Geochemistry of rock samples from the National Geochemical Database: U.S. Geological Survey, Reston, VA.	U.S. Geological Survey	USGS		36	-111.883	0.01	67	67	67	UNKNOWN	SEDIMENTARY	UNKNOWN	UNKNOWN	LIMESTONE		25.4	0.38	6.6		1.3		1.2		0.05	7.1	26.9			2.3	0.06									1.1	180	7.8	6.8	8.6
D115827		USGS		Geochemistry of rock samples from the National Geochemical Database: U.S. Geological Survey, Reston, VA.	U.S. Geological Survey	USGS		47.25	-112.5	0.01	67	67	67	MISC	SEDIMENTARY	UNKNOWN	UNKNOWN	LIMESTONE																		39.7
D115827		USGS		Geochemistry of rock samples from the National Geochemical Database: U.S. Geological Survey, Reston, VA.	U.S. Geological Survey	USGS		47.25	-112.5	0.01	67	67	67	UNKNOWN	SEDIMENTARY	UNKNOWN	UNKNOWN	LIMESTONE		7.1	0.1	2.4		1		0.34			2.1	46.5		0.62	0.52	0.04									0.62	230	4.9		1.7		38
D115828		USGS		Geochemistry of rock samples from the National Geochemical Database: U.S. Geological Survey, Reston, VA.	U.S. Geological Survey	USGS		36	-112	0.01	67	67	67	MISC	SEDIMENTARY	UNKNOWN	UNKNOWN	LIMESTONE																		31.9
D115828		USGS		Geochemistry of rock samples from the National Geochemical Database: U.S. Geological Survey, Reston, VA.	U.S. Geological Survey	USGS		36	-112	0.01	67	67	67	UNKNOWN	SEDIMENTARY	UNKNOWN	UNKNOWN	LIMESTONE		21.3	0.21	3.6		0.7		0.34		0.02	1.5	38.1			1.8	0.04									0.71	260	4.2	3.8	2.5		64
D115830		USGS		Geochemistry of rock samples from the National Geochemical Database: U.S. Geological Survey, Reston, VA.	U.S. Geological Survey	USGS		36.8833	-115.25	0.01	67	67	67	MISC	SEDIMENTARY	UNKNOWN	UNKNOWN	LIMESTONE																		25.7
D115830		USGS		Geochemistry of rock samples from the National Geochemical Database: U.S. Geological Survey, Reston, VA.	U.S. Geological Survey	USGS		36.8833	-115.25	0.01	67	67	67	UNKNOWN	SEDIMENTARY	UNKNOWN	UNKNOWN	LIMESTONE		36.2	0.27	3.5		0.5		0.06		0.01	1.9	27.6			2										0.22	33		2.3	0.95		60
D115831		USGS		Geochemistry of rock samples from the National Geochemical Database: U.S. Geological Survey, Reston, VA.	U.S. Geological Survey	USGS		42.6333	-108	0.01	67	67	67	MISC	SEDIMENTARY	UNKNOWN	UNKNOWN	LIMESTONE																		31.8
D115831		USGS		Geochemistry of rock samples from the National Geochemical Database: U.S. Geological Survey, Reston, VA.	U.S. Geological Survey	USGS		42.6333	-108	0.01	67	67	67	UNKNOWN	SEDIMENTARY	UNKNOWN	UNKNOWN	LIMESTONE		21.3	0.08	2.5		2.6		0.3		0.1	0.6	38.2		0.78	1.7	0.31									1.4	490		3.3	1.4
D115832		USGS		Geochemistry of rock samples from the National Geochemical Database: U.S. Geological Survey, Reston, VA.	U.S. Geological Survey	USGS		39.5	-107.383	0.01	67	67	67	MISC	SEDIMENTARY	UNKNOWN	UNKNOWN	LIMESTONE																		29.4
D115832		USGS		Geochemistry of rock samples from the National Geochemical Database: U.S. Geological Survey, Reston, VA.	U.S. Geological Survey	USGS		39.5	-107.383	0.01	67	67	67	UNKNOWN	SEDIMENTARY	UNKNOWN	UNKNOWN	LIMESTONE		30	0.15	4		0.59		1.1		0.05	12.2	19.6		0.1	3	0.22									0.75	150	4	4.3	2.7		15
D115833		USGS		Geochemistry of rock samples from the National Geochemical Database: U.S. Geological Survey, Reston, VA.	U.S. Geological Survey	USGS		32.3833	-109.133	0.01	69	69	69	MISC	SEDIMENTARY	UNKNOWN	UNKNOWN	LIMESTONE																		44.7
D115833		USGS		Geochemistry of rock samples from the National Geochemical Database: U.S. Geological Survey, Reston, VA.	U.S. Geological Survey	USGS		32.3833	-109.133	0.01	69	69	69	UNKNOWN	SEDIMENTARY	UNKNOWN	UNKNOWN	LIMESTONE		3	0.08	0.3		0.15		0.4		0.03	20.4	29.1			0.36	0.03									0.25	120					41
D115834		USGS		Geochemistry of rock samples from the National Geochemical Database: U.S. Geological Survey, Reston, VA.	U.S. Geological Survey	USGS		36	-111.883	0.01	67	67	67	MISC	SEDIMENTARY	UNKNOWN	UNKNOWN	LIMESTONE																		17
D115834		USGS		Geochemistry of rock samples from the National Geochemical Database: U.S. Geological Survey, Reston, VA.	U.S. Geological Survey	USGS		36	-111.883	0.01	67	67	67	UNKNOWN	SEDIMENTARY	UNKNOWN	UNKNOWN	LIMESTONE		48.5	0.29	7.2		1.1		0.42		0.04	0.43	20.1		0.19	5.1	0.22									0.36	230	2.3	1.4	0.7		120
D115835		USGS		Geochemistry of rock samples from the National Geochemical Database: U.S. Geological Survey, Reston, VA.	U.S. Geological Survey	USGS		38.6333	-106.383	0.01	69	69	69	MISC	SEDIMENTARY	UNKNOWN	UNKNOWN	LIMESTONE																		42
D115835		USGS		Geochemistry of rock samples from the National Geochemical Database: U.S. Geological Survey, Reston, VA.	U.S. Geological Survey	USGS		38.6333	-106.383	0.01	69	69	69	UNKNOWN	SEDIMENTARY	UNKNOWN	UNKNOWN	LIMESTONE		6.1	0.07	1.5		0.75		0.1		0.07	16.6	29.9			0.6	0.4									0.9	270	8	8.4	3.9
D115836		USGS		Geochemistry of rock samples from the National Geochemical Database: U.S. Geological Survey, Reston, VA.	U.S. Geological Survey	USGS		47.25	-112.5	0.01	67	67	67	MISC	SEDIMENTARY	UNKNOWN	UNKNOWN	LIMESTONE																		30.9
D115836		USGS		Geochemistry of rock samples from the National Geochemical Database: U.S. Geological Survey, Reston, VA.	U.S. Geological Survey	USGS		47.25	-112.5	0.01	67	67	67	UNKNOWN	SEDIMENTARY	UNKNOWN	UNKNOWN	LIMESTONE		22	0.25	4.5		1		0.74		0.04	1.2	36.3		1.6	1.4	0.06									0.32	81	2.2	2.1	1.5
D115837		USGS		Geochemistry of rock samples from the National Geochemical Database: U.S. Geological Survey, Reston, VA.	U.S. Geological Survey	USGS		36.75	-115.25	0.01	67	67	67	UNKNOWN	SEDIMENTARY	UNKNOWN	UNKNOWN	LIMESTONE		1	0.02	0.2		0.32		0.18		0.01	4.4	48.1		0.58	0.18	0.01									0.36	140	4	3	1.8
D115839		USGS		Geochemistry of rock samples from the National Geochemical Database: U.S. Geological Survey, Reston, VA.	U.S. Geological Survey	USGS		36.75	-115.25	0.01	67	67	67	MISC	SEDIMENTARY	UNKNOWN	UNKNOWN	LIMESTONE																		43.7
D115839		USGS		Geochemistry of rock samples from the National Geochemical Database: U.S. Geological Survey, Reston, VA.	U.S. Geological Survey	USGS		36.75	-115.25	0.01	67	67	67	UNKNOWN	SEDIMENTARY	UNKNOWN	UNKNOWN	LIMESTONE		0.29		0.08		0.24		0.04			1.3	55.9		0.21	0.09											7.9	3.7		0.64		64
D115840		USGS		Geochemistry of rock samples from the National Geochemical Database: U.S. Geological Survey, Reston, VA.	U.S. Geological Survey	USGS		38.8833	-104.883	0.01	69	69	69	MISC	SEDIMENTARY	UNKNOWN	UNKNOWN	LIMESTONE																		41
D115840		USGS		Geochemistry of rock samples from the National Geochemical Database: U.S. Geological Survey, Reston, VA.	U.S. Geological Survey	USGS		38.8833	-104.883	0.01	69	69	69	UNKNOWN	SEDIMENTARY	UNKNOWN	UNKNOWN	LIMESTONE		6.7	0.06	1.4		0.5		0.42		0.05	11.5	35		1.1	0.85	0.04									1	500			5
D115841		USGS		Geochemistry of rock samples from the National Geochemical Database: U.S. Geological Survey, Reston, VA.	U.S. Geological Survey	USGS		44.5	-107	0.01	67	67	67	MISC	SEDIMENTARY	UNKNOWN	UNKNOWN	LIMESTONE																		27.7
D115841		USGS		Geochemistry of rock samples from the National Geochemical Database: U.S. Geological Survey, Reston, VA.	U.S. Geological Survey	USGS		44.5	-107	0.01	67	67	67	UNKNOWN	SEDIMENTARY	UNKNOWN	UNKNOWN	LIMESTONE		31.6	0.1	2.2		1		0.2		0.03	0.4	36		0.14	1.4	0.6									0.52	220	4	2.8	3.9		34
D115842		USGS		Geochemistry of rock samples from the National Geochemical Database: U.S. Geological Survey, Reston, VA.	U.S. Geological Survey	USGS		47.8833	-108.633	0.01	69	68	67	UNKNOWN	SEDIMENTARY	UNKNOWN	UNKNOWN	LIMESTONE																									2.5	700		3	5
D115870		USGS		Geochemistry of rock samples from the National Geochemical Database: U.S. Geological Survey, Reston, VA.	U.S. Geological Survey	USGS		33	-107.133	0.01	69	69	69	MISC	SEDIMENTARY	UNKNOWN	UNKNOWN	LIMESTONE																		44.8
D115844		USGS		Geochemistry of rock samples from the National Geochemical Database: U.S. Geological Survey, Reston, VA.	U.S. Geological Survey	USGS		39	-114.5	0.01	67	67	67	MISC	SEDIMENTARY	UNKNOWN	UNKNOWN	LIMESTONE																		42.8
D115844		USGS		Geochemistry of rock samples from the National Geochemical Database: U.S. Geological Survey, Reston, VA.	U.S. Geological Survey	USGS		39	-114.5	0.01	67	67	67	UNKNOWN	SEDIMENTARY	UNKNOWN	UNKNOWN	LIMESTONE		1.2	0.01	0.7		0.31		0.14		0.01	4.2	50		0.85	0.27	0.02									0.14	28		2	1.3
D115846		USGS		Geochemistry of rock samples from the National Geochemical Database: U.S. Geological Survey, Reston, VA.	U.S. Geological Survey	USGS		39	-114.5	0.01	69	68	67	MISC	SEDIMENTARY	UNKNOWN	UNKNOWN	LIMESTONE																		37.9
D115846		USGS		Geochemistry of rock samples from the National Geochemical Database: U.S. Geological Survey, Reston, VA.	U.S. Geological Survey	USGS		39	-114.5	0.01	69	68	67	UNKNOWN	SEDIMENTARY	UNKNOWN	UNKNOWN	LIMESTONE		9.3	0.06	1		0.6		0.1		0.01	0.93	49.1		0.5	0.39	0.15									0.33	150	7.9	3.4	2.1		44
D115847		USGS		Geochemistry of rock samples from the National Geochemical Database: U.S. Geological Survey, Reston, VA.	U.S. Geological Survey	USGS		38.6333	-106.383	0.01	69	69	69	MISC	SEDIMENTARY	UNKNOWN	UNKNOWN	LIMESTONE																		44.7
D115847		USGS		Geochemistry of rock samples from the National Geochemical Database: U.S. Geological Survey, Reston, VA.	U.S. Geological Survey	USGS		38.6333	-106.383	0.01	69	69	69	UNKNOWN	SEDIMENTARY	UNKNOWN	UNKNOWN	LIMESTONE		2.5	0.06	1.3		0.04		0.14		0.02	21.3	29.7		0.08	0.37	0.01									0.14	110	4.1		0.67		46
D115848		USGS		Geochemistry of rock samples from the National Geochemical Database: U.S. Geological Survey, Reston, VA.	U.S. Geological Survey	USGS		34.5	-115.5	0.01	67	67	67	MISC	SEDIMENTARY	UNKNOWN	UNKNOWN	LIMESTONE																		33.8
D115848		USGS		Geochemistry of rock samples from the National Geochemical Database: U.S. Geological Survey, Reston, VA.	U.S. Geological Survey	USGS		34.5	-115.5	0.01	67	67	67	UNKNOWN	SEDIMENTARY	UNKNOWN	UNKNOWN	LIMESTONE		13.2	0.2	4.9		1.5		1.7		0.09	1.6	41.4		0.85	1.3	0.05									3	1600		5	15
D115849		USGS		Geochemistry of rock samples from the National Geochemical Database: U.S. Geological Survey, Reston, VA.	U.S. Geological Survey	USGS		36.75	-115.25	0.01	67	67	67	MISC	SEDIMENTARY	UNKNOWN	UNKNOWN	LIMESTONE																		33.6
D115849		USGS		Geochemistry of rock samples from the National Geochemical Database: U.S. Geological Survey, Reston, VA.	U.S. Geological Survey	USGS		36.75	-115.25	0.01	67	67	67	UNKNOWN	SEDIMENTARY	UNKNOWN	UNKNOWN	LIMESTONE		25.4		0.19		0.19		0.1			5.5	35.8		0.52	0.1											23					45
D115850		USGS		Geochemistry of rock samples from the National Geochemical Database: U.S. Geological Survey, Reston, VA.	U.S. Geological Survey	USGS		40.5	-111.5	0.01	67	67	67	MISC	SEDIMENTARY	UNKNOWN	UNKNOWN	LIMESTONE																		39.3
D115850		USGS		Geochemistry of rock samples from the National Geochemical Database: U.S. Geological Survey, Reston, VA.	U.S. Geological Survey	USGS		40.5	-111.5	0.01	67	67	67	UNKNOWN	SEDIMENTARY	UNKNOWN	UNKNOWN	LIMESTONE		6.4	0.1	2.3		0.4		0.7		0.04	2.3	46.3		0.08	1.1	0.15									0.49	310	4.5	3.7	1.2		79
D115851		USGS		Geochemistry of rock samples from the National Geochemical Database: U.S. Geological Survey, Reston, VA.	U.S. Geological Survey	USGS		40.1333	-111.5	0.01	67	67	67	MISC	SEDIMENTARY	UNKNOWN	UNKNOWN	LIMESTONE																		41.5
D115851		USGS		Geochemistry of rock samples from the National Geochemical Database: U.S. Geological Survey, Reston, VA.	U.S. Geological Survey	USGS		40.1333	-111.5	0.01	67	67	67	UNKNOWN	SEDIMENTARY	UNKNOWN	UNKNOWN	LIMESTONE		2.6	0.05	1.6		0.14		0.16		0.01	1.4	51.2		0.5	0.71	0.02									0.37	170	2.9	3.4	2.9
D115852		USGS		Geochemistry of rock samples from the National Geochemical Database: U.S. Geological Survey, Reston, VA.	U.S. Geological Survey	USGS		38.5	-105.25	0.01	69	69	69	MISC	SEDIMENTARY	UNKNOWN	UNKNOWN	LIMESTONE																		45.8
D115852		USGS		Geochemistry of rock samples from the National Geochemical Database: U.S. Geological Survey, Reston, VA.	U.S. Geological Survey	USGS		38.5	-105.25	0.01	69	69	69	UNKNOWN	SEDIMENTARY	UNKNOWN	UNKNOWN	LIMESTONE		1	0.03	0.4		0.4		0.08		0.16	16.4	36.8		0.1	0.25	0.01									0.24	570	4	8.1	16		110
D115853		USGS		Geochemistry of rock samples from the National Geochemical Database: U.S. Geological Survey, Reston, VA.	U.S. Geological Survey	USGS		38.8833	-104.883	0.01	69	69	69	MISC	SEDIMENTARY	UNKNOWN	UNKNOWN	LIMESTONE																		40.6
D115853		USGS		Geochemistry of rock samples from the National Geochemical Database: U.S. Geological Survey, Reston, VA.	U.S. Geological Survey	USGS		38.8833	-104.883	0.01	69	69	69	UNKNOWN	SEDIMENTARY	UNKNOWN	UNKNOWN	LIMESTONE		6.5	0.07	1.3		0.45		0.42		0.05	11.5	35.9		0.05	0.9	0.05									1.1	400			7
D115854		USGS		Geochemistry of rock samples from the National Geochemical Database: U.S. Geological Survey, Reston, VA.	U.S. Geological Survey	USGS		31.6333	-110	0.01	69	68	67	MISC	SEDIMENTARY	UNKNOWN	UNKNOWN	LIMESTONE																		28.8
D115854		USGS		Geochemistry of rock samples from the National Geochemical Database: U.S. Geological Survey, Reston, VA.	U.S. Geological Survey	USGS		31.6333	-110	0.01	69	68	67	UNKNOWN	SEDIMENTARY	UNKNOWN	UNKNOWN	LIMESTONE		26.8	0.21	3.2		1.3		1.2			1.4	36.2		0.08	1.2	0.3									1.1	430	3.2	5.8	2.2		46
D115855		USGS		Geochemistry of rock samples from the National Geochemical Database: U.S. Geological Survey, Reston, VA.	U.S. Geological Survey	USGS		34.8833	-112.883	0.01	67	67	67	MISC	SEDIMENTARY	UNKNOWN	UNKNOWN	LIMESTONE																		37.4
D115855		USGS		Geochemistry of rock samples from the National Geochemical Database: U.S. Geological Survey, Reston, VA.	U.S. Geological Survey	USGS		34.8833	-112.883	0.01	67	67	67	UNKNOWN	SEDIMENTARY	UNKNOWN	UNKNOWN	LIMESTONE		15.1	0.26	4.3		3.4		2.1		0.34	14.6	19.7			1.4	0.05									1.3	1300	3	7.3	3.1
D115856		USGS		Geochemistry of rock samples from the National Geochemical Database: U.S. Geological Survey, Reston, VA.	U.S. Geological Survey	USGS		45.8833	-111.25	0.01	67	67	67	MISC	SEDIMENTARY	UNKNOWN	UNKNOWN	LIMESTONE																		43
D115856		USGS		Geochemistry of rock samples from the National Geochemical Database: U.S. Geological Survey, Reston, VA.	U.S. Geological Survey	USGS		45.8833	-111.25	0.01	67	67	67	UNKNOWN	SEDIMENTARY	UNKNOWN	UNKNOWN	LIMESTONE						0.35		0.06			0.59	54.3			0.09										0.13	35		1.4	1.1
D115857		USGS		Geochemistry of rock samples from the National Geochemical Database: U.S. Geological Survey, Reston, VA.	U.S. Geological Survey	USGS		44.25	-103.75	0.01	69	68	67	MISC	SEDIMENTARY	UNKNOWN	UNKNOWN	LIMESTONE																		27.4
D115857		USGS		Geochemistry of rock samples from the National Geochemical Database: U.S. Geological Survey, Reston, VA.	U.S. Geological Survey	USGS		44.25	-103.75	0.01	69	68	67	UNKNOWN	SEDIMENTARY	UNKNOWN	UNKNOWN	LIMESTONE		31.8	0.16	2.2		0.25		0.38		0.17	0.5	36			0.13	0.59									1.2	810	6	6.2	2.1		82
D115858		USGS		Geochemistry of rock samples from the National Geochemical Database: U.S. Geological Survey, Reston, VA.	U.S. Geological Survey	USGS		32.1333	-109.5	0.01	69	68	67	MISC	SEDIMENTARY	UNKNOWN	UNKNOWN	LIMESTONE																		45.8
D115858		USGS		Geochemistry of rock samples from the National Geochemical Database: U.S. Geological Survey, Reston, VA.	U.S. Geological Survey	USGS		32.1333	-109.5	0.01	69	68	67	UNKNOWN	SEDIMENTARY	UNKNOWN	UNKNOWN	LIMESTONE		1.6	0.03	0.5		0.5		0.24		0.02	20.2	30.5			0.3	0.05									0.25	180		1.3	0.89		68
D115859		USGS		Geochemistry of rock samples from the National Geochemical Database: U.S. Geological Survey, Reston, VA.	U.S. Geological Survey	USGS		38.8833	-104.883	0.01	67	67	67	MISC	SEDIMENTARY	UNKNOWN	UNKNOWN	LIMESTONE																		40.7
D115859		USGS		Geochemistry of rock samples from the National Geochemical Database: U.S. Geological Survey, Reston, VA.	U.S. Geological Survey	USGS		38.8833	-104.883	0.01	67	67	67	UNKNOWN	SEDIMENTARY	UNKNOWN	UNKNOWN	LIMESTONE		6.5	0.06	1.4		0.5		0.4		0.05	11.5	35.7			0.86	0.05									1.1	400		3	10
D115860		USGS		Geochemistry of rock samples from the National Geochemical Database: U.S. Geological Survey, Reston, VA.	U.S. Geological Survey	USGS		39	-114.5	0.01	67	67	67	MISC	SEDIMENTARY	UNKNOWN	UNKNOWN	LIMESTONE																		35.9
D115860		USGS		Geochemistry of rock samples from the National Geochemical Database: U.S. Geological Survey, Reston, VA.	U.S. Geological Survey	USGS		39	-114.5	0.01	67	67	67	UNKNOWN	SEDIMENTARY	UNKNOWN	UNKNOWN	LIMESTONE		13.3	0.15	4.2		1.3		0.54		0.01	0.3	40.5		0.3	0.8	0.03									0.85	120	6	5.1	4.9		76
D115861		USGS		Geochemistry of rock samples from the National Geochemical Database: U.S. Geological Survey, Reston, VA.	U.S. Geological Survey	USGS		39.3833	-116	0.01	67	67	67	MISC	SEDIMENTARY	UNKNOWN	UNKNOWN	LIMESTONE																		43.2
D115861		USGS		Geochemistry of rock samples from the National Geochemical Database: U.S. Geological Survey, Reston, VA.	U.S. Geological Survey	USGS		39.3833	-116	0.01	67	67	67	UNKNOWN	SEDIMENTARY	UNKNOWN	UNKNOWN	LIMESTONE		1.3		0.19		0.21		0.06			0.7	52.9			0.07	0.06									0.074	210			1.2
D115862		USGS		Geochemistry of rock samples from the National Geochemical Database: U.S. Geological Survey, Reston, VA.	U.S. Geological Survey	USGS		47.8833	-108.5	0.01	69	68	67	MISC	SEDIMENTARY	UNKNOWN	UNKNOWN	LIMESTONE																		21.2
D115862		USGS		Geochemistry of rock samples from the National Geochemical Database: U.S. Geological Survey, Reston, VA.	U.S. Geological Survey	USGS		47.8833	-108.5	0.01	69	68	67	UNKNOWN	SEDIMENTARY	UNKNOWN	UNKNOWN	LIMESTONE		45.9	0.21	3.9		0.7		0.5		0.11	0.6	22.7		0.1	1.5	0.25									0.65	260	2.4	5.8	1.6
D115863		USGS		Geochemistry of rock samples from the National Geochemical Database: U.S. Geological Survey, Reston, VA.	U.S. Geological Survey	USGS		38.8833	-104.883	0.01	69	69	69	MISC	SEDIMENTARY	UNKNOWN	UNKNOWN	LIMESTONE																		40.9
D115863		USGS		Geochemistry of rock samples from the National Geochemical Database: U.S. Geological Survey, Reston, VA.	U.S. Geological Survey	USGS		38.8833	-104.883	0.01	69	69	69	UNKNOWN	SEDIMENTARY	UNKNOWN	UNKNOWN	LIMESTONE		8	0.07	1		0.43		0.42		0.06	11.9	35			0.88	0.06									1	780			5
D115864		USGS		Geochemistry of rock samples from the National Geochemical Database: U.S. Geological Survey, Reston, VA.	U.S. Geological Survey	USGS		44	-103.25	0.01	69	68	67	MISC	SEDIMENTARY	UNKNOWN	UNKNOWN	LIMESTONE																		34
D115864		USGS		Geochemistry of rock samples from the National Geochemical Database: U.S. Geological Survey, Reston, VA.	U.S. Geological Survey	USGS		44	-103.25	0.01	69	68	67	UNKNOWN	SEDIMENTARY	UNKNOWN	UNKNOWN	LIMESTONE		15.2	0.1	3.1		1.6		0.34		0.18	2.1	38.6			1.9	0.71									1.2	1000	6.5	9	1.5
D115865		USGS		Geochemistry of rock samples from the National Geochemical Database: U.S. Geological Survey, Reston, VA.	U.S. Geological Survey	USGS		39.3833	-115.883	0.01	69	69	69	MISC	SEDIMENTARY	UNKNOWN	UNKNOWN	LIMESTONE																		34.6
D115865		USGS		Geochemistry of rock samples from the National Geochemical Database: U.S. Geological Survey, Reston, VA.	U.S. Geological Survey	USGS		39.3833	-115.883	0.01	69	69	69	UNKNOWN	SEDIMENTARY	UNKNOWN	UNKNOWN	LIMESTONE		19.9	0.07	0.82		0.35		0.06		0.02	0.25	44.7			0.28	0.48									0.14	230		2.6	0.84		68
D115866		USGS		Geochemistry of rock samples from the National Geochemical Database: U.S. Geological Survey, Reston, VA.	U.S. Geological Survey	USGS		38.8833	-104.883	0.01	69	69	69	MISC	SEDIMENTARY	UNKNOWN	UNKNOWN	LIMESTONE																		40.8
D115866		USGS		Geochemistry of rock samples from the National Geochemical Database: U.S. Geological Survey, Reston, VA.	U.S. Geological Survey	USGS		38.8833	-104.883	0.01	69	69	69	UNKNOWN	SEDIMENTARY	UNKNOWN	UNKNOWN	LIMESTONE		8.1	0.07	1.2		0.5		0.42		0.05	11.3	35.3			0.85	0.05									1.1	400			7
D115867		USGS		Geochemistry of rock samples from the National Geochemical Database: U.S. Geological Survey, Reston, VA.	U.S. Geological Survey	USGS		40	-113.75	0.01	67	67	67	MISC	SEDIMENTARY	UNKNOWN	UNKNOWN	LIMESTONE																		37.7
D115867		USGS		Geochemistry of rock samples from the National Geochemical Database: U.S. Geological Survey, Reston, VA.	U.S. Geological Survey	USGS		40	-113.75	0.01	67	67	67	UNKNOWN	SEDIMENTARY	UNKNOWN	UNKNOWN	LIMESTONE		9	0.12	3.7		0.65		0.2		0.01	1.7	44.9		0.1	1.1	0.03									0.55	260	4.8	4.9	2.9
D115868		USGS		Geochemistry of rock samples from the National Geochemical Database: U.S. Geological Survey, Reston, VA.	U.S. Geological Survey	USGS		44.5	-107	0.01	67	67	67	MISC	SEDIMENTARY	UNKNOWN	UNKNOWN	LIMESTONE																		25.9
D115868		USGS		Geochemistry of rock samples from the National Geochemical Database: U.S. Geological Survey, Reston, VA.	U.S. Geological Survey	USGS		44.5	-107	0.01	67	67	67	UNKNOWN	SEDIMENTARY	UNKNOWN	UNKNOWN	LIMESTONE		37.2	0.15	3.2		1		0.84		0.07	3.5	22.5		1.7	1.8	0.11									0.76	240	2.5	3	1.2		70
D115870		USGS		Geochemistry of rock samples from the National Geochemical Database: U.S. Geological Survey, Reston, VA.	U.S. Geological Survey	USGS		33	-107.133	0.01	69	69	69	UNKNOWN	SEDIMENTARY	UNKNOWN	UNKNOWN	LIMESTONE		3	0.03	0.5		0.33		0.32		0.06	18.3	30.9			0.26	0.01									0.39	260			1.2		68
D115872		USGS		Geochemistry of rock samples from the National Geochemical Database: U.S. Geological Survey, Reston, VA.	U.S. Geological Survey	USGS		34.8833	-112.75	0.01	67	67	67	UNKNOWN	SEDIMENTARY	UNKNOWN	UNKNOWN	LIMESTONE																									3.9	1200		15	15
D115873		USGS		Geochemistry of rock samples from the National Geochemical Database: U.S. Geological Survey, Reston, VA.	U.S. Geological Survey	USGS		39.5	-107.383	0.01	67	67	67	MISC	SEDIMENTARY	UNKNOWN	UNKNOWN	LIMESTONE																		29.2
D115876		USGS		Geochemistry of rock samples from the National Geochemical Database: U.S. Geological Survey, Reston, VA.	U.S. Geological Survey	USGS		39.1333	-114.5	0.01	69	68	67	MISC	SEDIMENTARY	UNKNOWN	UNKNOWN	LIMESTONE																		38.8
D115873		USGS		Geochemistry of rock samples from the National Geochemical Database: U.S. Geological Survey, Reston, VA.	U.S. Geological Survey	USGS		39.5	-107.383	0.01	67	67	67	UNKNOWN	SEDIMENTARY	UNKNOWN	UNKNOWN	LIMESTONE		30.7	0.14	4.2		0.59		1.1		0.06	12.7	18.7		0.14	3	0.26									0.95	220	5.5	4.7	3		31
D115875		USGS		Geochemistry of rock samples from the National Geochemical Database: U.S. Geological Survey, Reston, VA.	U.S. Geological Survey	USGS		42.75	-108	0.01	67	67	67	MISC	SEDIMENTARY	UNKNOWN	UNKNOWN	LIMESTONE																		22.5
D115875		USGS		Geochemistry of rock samples from the National Geochemical Database: U.S. Geological Survey, Reston, VA.	U.S. Geological Survey	USGS		42.75	-108	0.01	67	67	67	UNKNOWN	SEDIMENTARY	UNKNOWN	UNKNOWN	LIMESTONE		37.7	0.16	5.8		3.2		0.16		0.17	0.9	26			3.8	0.27									1.8	890	2.8	4.2	2.3		58
D115876		USGS		Geochemistry of rock samples from the National Geochemical Database: U.S. Geological Survey, Reston, VA.	U.S. Geological Survey	USGS		39.1333	-114.5	0.01	69	68	67	UNKNOWN	SEDIMENTARY	UNKNOWN	UNKNOWN	LIMESTONE		10	0.02	0.66		0.19		0.14		0.09	0.64	49.4		0.08	0.1	0.29									0.17	380			0.8		30
D115878		USGS		Geochemistry of rock samples from the National Geochemical Database: U.S. Geological Survey, Reston, VA.	U.S. Geological Survey	USGS		40.25	-111.5	0.01	67	67	67	MISC	SEDIMENTARY	UNKNOWN	UNKNOWN	LIMESTONE																		46.8
D115878		USGS		Geochemistry of rock samples from the National Geochemical Database: U.S. Geological Survey, Reston, VA.	U.S. Geological Survey	USGS		40.25	-111.5	0.01	67	67	67	UNKNOWN	SEDIMENTARY	UNKNOWN	UNKNOWN	LIMESTONE		0.22	0.07	0.2		0.18		0.08		0.04	21.5	30.2		0.08	0.04										0.17	190		1.3			44
D115880		USGS		Geochemistry of rock samples from the National Geochemical Database: U.S. Geological Survey, Reston, VA.	U.S. Geological Survey	USGS		37.25	-115.75	0.01	67	67	67	MISC	SEDIMENTARY	UNKNOWN	UNKNOWN	LIMESTONE																		47
D115880		USGS		Geochemistry of rock samples from the National Geochemical Database: U.S. Geological Survey, Reston, VA.	U.S. Geological Survey	USGS		37.25	-115.75	0.01	67	67	67	UNKNOWN	SEDIMENTARY	UNKNOWN	UNKNOWN	LIMESTONE		0.7	0.01	0.3				0.06		0.01	21	30		2.1	0.16	0.01										26			0.63
D115881		USGS		Geochemistry of rock samples from the National Geochemical Database: U.S. Geological Survey, Reston, VA.	U.S. Geological Survey	USGS		44	-103.25	0.01	69	68	67	MISC	SEDIMENTARY	UNKNOWN	UNKNOWN	LIMESTONE																		37.3
D115881		USGS		Geochemistry of rock samples from the National Geochemical Database: U.S. Geological Survey, Reston, VA.	U.S. Geological Survey	USGS		44	-103.25	0.01	69	68	67	UNKNOWN	SEDIMENTARY	UNKNOWN	UNKNOWN	LIMESTONE		9	0.06	1.3		1.7		1.2		0.52	4	45		0.08	0.28	0.37									1.8	3000	7.3	11	16		84
D115882		USGS		Geochemistry of rock samples from the National Geochemical Database: U.S. Geological Survey, Reston, VA.	U.S. Geological Survey	USGS		38.8833	-104.883	0.01	69	69	69	MISC	SEDIMENTARY	UNKNOWN	UNKNOWN	LIMESTONE																		40.8
D115882		USGS		Geochemistry of rock samples from the National Geochemical Database: U.S. Geological Survey, Reston, VA.	U.S. Geological Survey	USGS		38.8833	-104.883	0.01	69	69	69	UNKNOWN	SEDIMENTARY	UNKNOWN	UNKNOWN	LIMESTONE		7.1	0.07	1.3		0.5		0.38		0.05	11.1	36.3		1.4	0.88	0.05									1	790			5
D115883		USGS		Geochemistry of rock samples from the National Geochemical Database: U.S. Geological Survey, Reston, VA.	U.S. Geological Survey	USGS		37.25	-115.633	0.01	67	67	67	MISC	SEDIMENTARY	UNKNOWN	UNKNOWN	LIMESTONE																		42
D115883		USGS		Geochemistry of rock samples from the National Geochemical Database: U.S. Geological Survey, Reston, VA.	U.S. Geological Survey	USGS		37.25	-115.633	0.01	67	67	67	UNKNOWN	SEDIMENTARY	UNKNOWN	UNKNOWN	LIMESTONE		4.1		0.37		0.35		0.06			1.6	51.4			0.19										0.18	47		2.2
D115884		USGS		Geochemistry of rock samples from the National Geochemical Database: U.S. Geological Survey, Reston, VA.	U.S. Geological Survey	USGS		31.6333	-110	0.01	69	68	67	MISC	SEDIMENTARY	UNKNOWN	UNKNOWN	LIMESTONE																		29.5
D115884		USGS		Geochemistry of rock samples from the National Geochemical Database: U.S. Geological Survey, Reston, VA.	U.S. Geological Survey	USGS		31.6333	-110	0.01	69	68	67	UNKNOWN	SEDIMENTARY	UNKNOWN	UNKNOWN	LIMESTONE		26.1	0.17	3.1		1.1		1.2		0.1	1.2	36.1		0.1	1.2	0.29									1.5	650	4.8	8.7	2.3
D115885		USGS		Geochemistry of rock samples from the National Geochemical Database: U.S. Geological Survey, Reston, VA.	U.S. Geological Survey	USGS		38.8833	-104.883	0.01	69	69	69	MISC	SEDIMENTARY	UNKNOWN	UNKNOWN	LIMESTONE																		40.8
D115885		USGS		Geochemistry of rock samples from the National Geochemical Database: U.S. Geological Survey, Reston, VA.	U.S. Geological Survey	USGS		38.8833	-104.883	0.01	69	69	69	UNKNOWN	SEDIMENTARY	UNKNOWN	UNKNOWN	LIMESTONE		6.4	0.07	1.6		0.5		0.38		0.05	11.3	37			0.88	0.05									0.85	670			5
D115886		USGS		Geochemistry of rock samples from the National Geochemical Database: U.S. Geological Survey, Reston, VA.	U.S. Geological Survey	USGS		36	-111.883	0.01	67	67	67	MISC	SEDIMENTARY	UNKNOWN	UNKNOWN	LIMESTONE																		36.8
D115886		USGS		Geochemistry of rock samples from the National Geochemical Database: U.S. Geological Survey, Reston, VA.	U.S. Geological Survey	USGS		36	-111.883	0.01	67	67	67	UNKNOWN	SEDIMENTARY	UNKNOWN	UNKNOWN	LIMESTONE		14	0.23	3.4		2.7		4.5		0.56	13.6	21.7			1.1	0.03									1.9	2300		5.3	4.7		50
D115887		USGS		Geochemistry of rock samples from the National Geochemical Database: U.S. Geological Survey, Reston, VA.	U.S. Geological Survey	USGS		44.3833	-103.633	0.01	69	68	67	MISC	SEDIMENTARY	UNKNOWN	UNKNOWN	LIMESTONE																		35.6
D115887		USGS		Geochemistry of rock samples from the National Geochemical Database: U.S. Geological Survey, Reston, VA.	U.S. Geological Survey	USGS		44.3833	-103.633	0.01	69	68	67	UNKNOWN	SEDIMENTARY	UNKNOWN	UNKNOWN	LIMESTONE		12.3	0.06	3		2.4		0.54		0.36	1.1	42.7		0.77	1.6	0.31									1.8	2000	8.7	17	11
D115888		USGS		Geochemistry of rock samples from the National Geochemical Database: U.S. Geological Survey, Reston, VA.	U.S. Geological Survey	USGS		44.3833	-103.633	0.01	69	68	67	UNKNOWN	SEDIMENTARY	UNKNOWN	UNKNOWN	LIMESTONE																									5.2	1000		7	5
D115889		USGS		Geochemistry of rock samples from the National Geochemical Database: U.S. Geological Survey, Reston, VA.	U.S. Geological Survey	USGS		38.8833	-104.633	0.01	69	69	69	MISC	SEDIMENTARY	UNKNOWN	UNKNOWN	LIMESTONE																		40.8
D115889		USGS		Geochemistry of rock samples from the National Geochemical Database: U.S. Geological Survey, Reston, VA.	U.S. Geological Survey	USGS		38.8833	-104.633	0.01	69	69	69	UNKNOWN	SEDIMENTARY	UNKNOWN	UNKNOWN	LIMESTONE		6.9	0.06	1.3		0.65		0.4		0.05	11.5	35.3		0.95	0.88	0.04									1.1	300			20
D115890		USGS		Geochemistry of rock samples from the National Geochemical Database: U.S. Geological Survey, Reston, VA.	U.S. Geological Survey	USGS		38.8833	-104.883	0.01	69	69	69	MISC	SEDIMENTARY	UNKNOWN	UNKNOWN	LIMESTONE																		40.5
D115890		USGS		Geochemistry of rock samples from the National Geochemical Database: U.S. Geological Survey, Reston, VA.	U.S. Geological Survey	USGS		38.8833	-104.883	0.01	69	69	69	UNKNOWN	SEDIMENTARY	UNKNOWN	UNKNOWN	LIMESTONE		6.9	0.06	1.1		0.52		0.38		0.05	12.6	33.8		0.9	0.83	0.04									1.1	200			10
D115891		USGS		Geochemistry of rock samples from the National Geochemical Database: U.S. Geological Survey, Reston, VA.	U.S. Geological Survey	USGS		45.75	-111.75	0.01	67	67	67	MISC	SEDIMENTARY	UNKNOWN	UNKNOWN	LIMESTONE																		41.3
D115891		USGS		Geochemistry of rock samples from the National Geochemical Database: U.S. Geological Survey, Reston, VA.	U.S. Geological Survey	USGS		45.75	-111.75	0.01	67	67	67	UNKNOWN	SEDIMENTARY	UNKNOWN	UNKNOWN	LIMESTONE		2.4	0.06	0.81		0.46		0.1		0.01	1.2	50.7		0.9	0.57	0.02									0.25	150	3.6	3.1	3
D115893		USGS		Geochemistry of rock samples from the National Geochemical Database: U.S. Geological Survey, Reston, VA.	U.S. Geological Survey	USGS		34.8833	-112.883	0.01	67	67	67	MISC	SEDIMENTARY	UNKNOWN	UNKNOWN	LIMESTONE																		37.7
D115893		USGS		Geochemistry of rock samples from the National Geochemical Database: U.S. Geological Survey, Reston, VA.	U.S. Geological Survey	USGS		34.8833	-112.883	0.01	67	67	67	UNKNOWN	SEDIMENTARY	UNKNOWN	UNKNOWN	LIMESTONE		13.6	0.25	4.2		4.1		2.1		0.37	13.4	20.7		2.4	1.3	0.05									1.3	1100	6.4	7.9	3.5		100
D115894		USGS		Geochemistry of rock samples from the National Geochemical Database: U.S. Geological Survey, Reston, VA.	U.S. Geological Survey	USGS		32.3833	-109.133	0.01	69	69	69	MISC	SEDIMENTARY	UNKNOWN	UNKNOWN	LIMESTONE																		40.5
D115894		USGS		Geochemistry of rock samples from the National Geochemical Database: U.S. Geological Survey, Reston, VA.	U.S. Geological Survey	USGS		32.3833	-109.133	0.01	69	69	69	UNKNOWN	SEDIMENTARY	UNKNOWN	UNKNOWN	LIMESTONE		3.6	0.01	0.3		0.27		0.18		0.01	7.4	45.4			0.15	0.11									0.18	210		2.2			31
D115895		USGS		Geochemistry of rock samples from the National Geochemical Database: U.S. Geological Survey, Reston, VA.	U.S. Geological Survey	USGS		43	-112.133	0.01	69	68	67	MISC	SEDIMENTARY	UNKNOWN	UNKNOWN	LIMESTONE																		33.8
D115895		USGS		Geochemistry of rock samples from the National Geochemical Database: U.S. Geological Survey, Reston, VA.	U.S. Geological Survey	USGS		43	-112.133	0.01	69	68	67	UNKNOWN	SEDIMENTARY	UNKNOWN	UNKNOWN	LIMESTONE		25.7	0.12	1.9		2.3		0.1		0.04	14.9	21.2			0.31	0.08									0.96	160	4.9	4.9	1.1		31
D115896		USGS		Geochemistry of rock samples from the National Geochemical Database: U.S. Geological Survey, Reston, VA.	U.S. Geological Survey	USGS		41.5	-111.883	0.01	67	67	67	MISC	SEDIMENTARY	UNKNOWN	UNKNOWN	LIMESTONE																		46.6
D115896		USGS		Geochemistry of rock samples from the National Geochemical Database: U.S. Geological Survey, Reston, VA.	U.S. Geological Survey	USGS		41.5	-111.883	0.01	67	67	67	UNKNOWN	SEDIMENTARY	UNKNOWN	UNKNOWN	LIMESTONE		1.2	0.01	0.1		0.04		0.06		0.01	21.5	30.4		2.6	0.09	0.02									0.051	52
D115897		USGS		Geochemistry of rock samples from the National Geochemical Database: U.S. Geological Survey, Reston, VA.	U.S. Geological Survey	USGS		38.5	-105.25	0.01	69	69	69	MISC	SEDIMENTARY	UNKNOWN	UNKNOWN	LIMESTONE																		44.4
D115897		USGS		Geochemistry of rock samples from the National Geochemical Database: U.S. Geological Survey, Reston, VA.	U.S. Geological Survey	USGS		38.5	-105.25	0.01	69	69	69	UNKNOWN	SEDIMENTARY	UNKNOWN	UNKNOWN	LIMESTONE		3.4	0.04	0.7		0.19		0.26		0.09	18.4	29.9		0.1	0.36	0.02									0.29	320	2.6	4.1	5.1		66
D115899		USGS		Geochemistry of rock samples from the National Geochemical Database: U.S. Geological Survey, Reston, VA.	U.S. Geological Survey	USGS		36	-111.883	0.01	67	67	67	MISC	SEDIMENTARY	UNKNOWN	UNKNOWN	LIMESTONE																		29.7
D115899		USGS		Geochemistry of rock samples from the National Geochemical Database: U.S. Geological Survey, Reston, VA.	U.S. Geological Survey	USGS		36	-111.883	0.01	67	67	67	UNKNOWN	SEDIMENTARY	UNKNOWN	UNKNOWN	LIMESTONE		25.7	0.35	6.6		1.6		1.1		0.05	7	26.6		0.1	2.2	0.06									1.2	230	6.1	6.5	7.7		44
D115901		USGS		Geochemistry of rock samples from the National Geochemical Database: U.S. Geological Survey, Reston, VA.	U.S. Geological Survey	USGS		38.8833	-104.883	0.01	69	69	69	MISC	SEDIMENTARY	UNKNOWN	UNKNOWN	LIMESTONE																		41.3
D115901		USGS		Geochemistry of rock samples from the National Geochemical Database: U.S. Geological Survey, Reston, VA.	U.S. Geological Survey	USGS		38.8833	-104.883	0.01	69	69	69	UNKNOWN	SEDIMENTARY	UNKNOWN	UNKNOWN	LIMESTONE		6.1	0.06	1.3		0.5		0.4		0.06	11.3	33.4		2.9	0.82	0.05									1	200			7
D115902		USGS		Geochemistry of rock samples from the National Geochemical Database: U.S. Geological Survey, Reston, VA.	U.S. Geological Survey	USGS		39.1333	-114.5	0.01	67	67	67	MISC	SEDIMENTARY	UNKNOWN	UNKNOWN	LIMESTONE																		43.5
D115902		USGS		Geochemistry of rock samples from the National Geochemical Database: U.S. Geological Survey, Reston, VA.	U.S. Geological Survey	USGS		39.1333	-114.5	0.01	67	67	67	UNKNOWN	SEDIMENTARY	UNKNOWN	UNKNOWN	LIMESTONE		0.52		0.2		0.04		0.02			0.61	54.1		0.08	0.04											24			3.4		120
D115903		USGS		Geochemistry of rock samples from the National Geochemical Database: U.S. Geological Survey, Reston, VA.	U.S. Geological Survey	USGS		36	-112	0.01	67	67	67	MISC	SEDIMENTARY	UNKNOWN	UNKNOWN	LIMESTONE																		35.4
D115903		USGS		Geochemistry of rock samples from the National Geochemical Database: U.S. Geological Survey, Reston, VA.	U.S. Geological Survey	USGS		36	-112	0.01	67	67	67	UNKNOWN	SEDIMENTARY	UNKNOWN	UNKNOWN	LIMESTONE		16.9	0.23	3.2		1.5		3.7		0.3	12.1	21.4		3.1	1.4	0.03									1.5	1400	4.3	3.9	2		50
D115904		USGS		Geochemistry of rock samples from the National Geochemical Database: U.S. Geological Survey, Reston, VA.	U.S. Geological Survey	USGS		32.75	-107.883	0.01	69	69	69	MISC	SEDIMENTARY	UNKNOWN	UNKNOWN	LIMESTONE																		45.4
D115904		USGS		Geochemistry of rock samples from the National Geochemical Database: U.S. Geological Survey, Reston, VA.	U.S. Geological Survey	USGS		32.75	-107.883	0.01	69	69	69	UNKNOWN	SEDIMENTARY	UNKNOWN	UNKNOWN	LIMESTONE		2.2		0.22		0.58		0.1		0.04	19.6	30.9		0.08	0.04										0.55	720	3	2.8	2.1		710
D115905		USGS		Geochemistry of rock samples from the National Geochemical Database: U.S. Geological Survey, Reston, VA.	U.S. Geological Survey	USGS		38.8833	-104.883	0.01	69	69	69	MISC	SEDIMENTARY	UNKNOWN	UNKNOWN	LIMESTONE																		41
D115905		USGS		Geochemistry of rock samples from the National Geochemical Database: U.S. Geological Survey, Reston, VA.	U.S. Geological Survey	USGS		38.8833	-104.883	0.01	69	69	69	UNKNOWN	SEDIMENTARY	UNKNOWN	UNKNOWN	LIMESTONE		6.3	0.07	1.1		0.31		0.44		0.06	12.7	36.8			0.88	0.06									1	740			5
D115906		USGS		Geochemistry of rock samples from the National Geochemical Database: U.S. Geological Survey, Reston, VA.	U.S. Geological Survey	USGS		32.8833	-110.633	0.01	69	68	67	MISC	SEDIMENTARY	UNKNOWN	UNKNOWN	LIMESTONE																		38.5
D115906		USGS		Geochemistry of rock samples from the National Geochemical Database: U.S. Geological Survey, Reston, VA.	U.S. Geological Survey	USGS		32.8833	-110.633	0.01	69	68	67	UNKNOWN	SEDIMENTARY	UNKNOWN	UNKNOWN	LIMESTONE		9	0.03	0.9		1		0.08		0.04	2.4	48.2			0.34	0.03									0.71	550	4.5	3	1		80
D115907		USGS		Geochemistry of rock samples from the National Geochemical Database: U.S. Geological Survey, Reston, VA.	U.S. Geological Survey	USGS		38.5	-106.5	0.01	69	69	69	MISC	SEDIMENTARY	UNKNOWN	UNKNOWN	LIMESTONE																		46.3
D115907		USGS		Geochemistry of rock samples from the National Geochemical Database: U.S. Geological Survey, Reston, VA.	U.S. Geological Survey	USGS		38.5	-106.5	0.01	69	69	69	UNKNOWN	SEDIMENTARY	UNKNOWN	UNKNOWN	LIMESTONE		0.9	0.03	0.1		0.05		0.1		0.02	21.3	31.9			0.22	0.01									0.14	220	2.4	2.2	0.54		49
D115908		USGS		Geochemistry of rock samples from the National Geochemical Database: U.S. Geological Survey, Reston, VA.	U.S. Geological Survey	USGS		38.8833	-104.883	0.01	69	69	69	MISC	SEDIMENTARY	UNKNOWN	UNKNOWN	LIMESTONE																		40.8
D115908		USGS		Geochemistry of rock samples from the National Geochemical Database: U.S. Geological Survey, Reston, VA.	U.S. Geological Survey	USGS		38.8833	-104.883	0.01	69	69	69	UNKNOWN	SEDIMENTARY	UNKNOWN	UNKNOWN	LIMESTONE		6	0.07	1		0.5		0.4		0.06	12.9	35.3			0.87	0.05									1	750			7
D115909		USGS		Geochemistry of rock samples from the National Geochemical Database: U.S. Geological Survey, Reston, VA.	U.S. Geological Survey	USGS		38.8833	-104.883	0.01	69	69	69	MISC	SEDIMENTARY	UNKNOWN	UNKNOWN	LIMESTONE																		40.6
D115909		USGS		Geochemistry of rock samples from the National Geochemical Database: U.S. Geological Survey, Reston, VA.	U.S. Geological Survey	USGS		38.8833	-104.883	0.01	69	69	69	UNKNOWN	SEDIMENTARY	UNKNOWN	UNKNOWN	LIMESTONE		6.6	0.07	1.6		0.52		0.38		0.05	11.5	36.9			0.91	0.06									1	810			10
D115910		USGS		Geochemistry of rock samples from the National Geochemical Database: U.S. Geological Survey, Reston, VA.	U.S. Geological Survey	USGS		38.8833	-104.883	0.01	69	69	69	MISC	SEDIMENTARY	UNKNOWN	UNKNOWN	LIMESTONE																		40.8
D115910		USGS		Geochemistry of rock samples from the National Geochemical Database: U.S. Geological Survey, Reston, VA.	U.S. Geological Survey	USGS		38.8833	-104.883	0.01	69	69	69	UNKNOWN	SEDIMENTARY	UNKNOWN	UNKNOWN	LIMESTONE		6.2	0.07	1.1		0.25		0.4		0.04	12.1	37			0.92	0.06									0.95	740			15
D115913		USGS		Geochemistry of rock samples from the National Geochemical Database: U.S. Geological Survey, Reston, VA.	U.S. Geological Survey	USGS		44.3833	-103.633	0.01	69	68	67	MISC	SEDIMENTARY	UNKNOWN	UNKNOWN	LIMESTONE																		28.6
D115913		USGS		Geochemistry of rock samples from the National Geochemical Database: U.S. Geological Survey, Reston, VA.	U.S. Geological Survey	USGS		44.3833	-103.633	0.01	69	68	67	UNKNOWN	SEDIMENTARY	UNKNOWN	UNKNOWN	LIMESTONE		28.3	0.1	2.5		2		1.3		0.18	2.2	33.1			1.3	0.36									0.099	230		1.3	0.66		45
D115914		USGS		Geochemistry of rock samples from the National Geochemical Database: U.S. Geological Survey, Reston, VA.	U.S. Geological Survey	USGS		36.75	-115.25	0.01	67	67	67	MISC	SEDIMENTARY	UNKNOWN	UNKNOWN	LIMESTONE																		42.2
D115914		USGS		Geochemistry of rock samples from the National Geochemical Database: U.S. Geological Survey, Reston, VA.	U.S. Geological Survey	USGS		36.75	-115.25	0.01	67	67	67	UNKNOWN	SEDIMENTARY	UNKNOWN	UNKNOWN	LIMESTONE		0.7	0.02	0.1		0.42		0.14		0.01	4.6	49.3			0.28	0.01									2	1300	7.3	11	6.2		60
D115915		USGS		Geochemistry of rock samples from the National Geochemical Database: U.S. Geological Survey, Reston, VA.	U.S. Geological Survey	USGS		32.1333	-109.633	0.01	69	68	67	MISC	SEDIMENTARY	UNKNOWN	UNKNOWN	LIMESTONE																		42.8
D115915		USGS		Geochemistry of rock samples from the National Geochemical Database: U.S. Geological Survey, Reston, VA.	U.S. Geological Survey	USGS		32.1333	-109.633	0.01	69	68	67	UNKNOWN	SEDIMENTARY	UNKNOWN	UNKNOWN	LIMESTONE		5.4	0.02	0.2		0.35		0.4		0.08	19.8	30			0.17	0.14									0.45	320					41
D115916		USGS		Geochemistry of rock samples from the National Geochemical Database: U.S. Geological Survey, Reston, VA.	U.S. Geological Survey	USGS		38.8833	-104.883	0.01	69	69	69	MISC	SEDIMENTARY	UNKNOWN	UNKNOWN	LIMESTONE																		39.8
D115916		USGS		Geochemistry of rock samples from the National Geochemical Database: U.S. Geological Survey, Reston, VA.	U.S. Geological Survey	USGS		38.8833	-104.883	0.01	69	69	69	UNKNOWN	SEDIMENTARY	UNKNOWN	UNKNOWN	LIMESTONE		6	0.07	0.8		0.3		0.4		0.04	12.7	36.7			0.88	0.05									0.96	720			7
D115917		USGS		Geochemistry of rock samples from the National Geochemical Database: U.S. Geological Survey, Reston, VA.	U.S. Geological Survey	USGS		42.6333	-108	0.01	67	67	67	MISC	SEDIMENTARY	UNKNOWN	UNKNOWN	LIMESTONE																		31.2
D115917		USGS		Geochemistry of rock samples from the National Geochemical Database: U.S. Geological Survey, Reston, VA.	U.S. Geological Survey	USGS		42.6333	-108	0.01	67	67	67	UNKNOWN	SEDIMENTARY	UNKNOWN	UNKNOWN	LIMESTONE		21	0.1	2.6		2.7		0.28		0.1	0.7	40.1			1.7	0.34									1.8	860	3.9	4.3	1.4
D115919		USGS		Geochemistry of rock samples from the National Geochemical Database: U.S. Geological Survey, Reston, VA.	U.S. Geological Survey	USGS		32.3833	-109.133	0.01	69	69	69	MISC	SEDIMENTARY	UNKNOWN	UNKNOWN	LIMESTONE																		33.5
D115919		USGS		Geochemistry of rock samples from the National Geochemical Database: U.S. Geological Survey, Reston, VA.	U.S. Geological Survey	USGS		32.3833	-109.133	0.01	69	69	69	UNKNOWN	SEDIMENTARY	UNKNOWN	UNKNOWN	LIMESTONE		18.6	0.11	2.6		0.66		0.54		0.01	5.7	38.7			0.88	0.06									0.73	170	6	3.9	1.4
D115920		USGS		Geochemistry of rock samples from the National Geochemical Database: U.S. Geological Survey, Reston, VA.	U.S. Geological Survey	USGS		38.8833	-104.883	0.01	69	69	69	MISC	SEDIMENTARY	UNKNOWN	UNKNOWN	LIMESTONE																		40.8
D115920		USGS		Geochemistry of rock samples from the National Geochemical Database: U.S. Geological Survey, Reston, VA.	U.S. Geological Survey	USGS		38.8833	-104.883	0.01	69	69	69	UNKNOWN	SEDIMENTARY	UNKNOWN	UNKNOWN	LIMESTONE		6.7	0.07	1.2		0.37		0.38		0.05	10.8	36.8			0.88	0.06									1.2	400			3
D115922		USGS		Geochemistry of rock samples from the National Geochemical Database: U.S. Geological Survey, Reston, VA.	U.S. Geological Survey	USGS		38.8833	-104.883	0.01	69	69	69	MISC	SEDIMENTARY	UNKNOWN	UNKNOWN	LIMESTONE																		41.8
D115922		USGS		Geochemistry of rock samples from the National Geochemical Database: U.S. Geological Survey, Reston, VA.	U.S. Geological Survey	USGS		38.8833	-104.883	0.01	69	69	69	UNKNOWN	SEDIMENTARY	UNKNOWN	UNKNOWN	LIMESTONE		6.1	0.08	0.8		0.42		0.38		0.05	11.9	35.6			0.86	0.04									1.1	200			5
D115923		USGS		Geochemistry of rock samples from the National Geochemical Database: U.S. Geological Survey, Reston, VA.	U.S. Geological Survey	USGS		36	-112	0.01	67	67	67	MISC	SEDIMENTARY	UNKNOWN	UNKNOWN	LIMESTONE																		40.2
D115923		USGS		Geochemistry of rock samples from the National Geochemical Database: U.S. Geological Survey, Reston, VA.	U.S. Geological Survey	USGS		36	-112	0.01	67	67	67	UNKNOWN	SEDIMENTARY	UNKNOWN	UNKNOWN	LIMESTONE		3.2	0.1	1.1		0.65		0.18		0.03	1.7	50.2			0.78	0.02									0.57	520	3.6	4.2	2		50
D115924		USGS		Geochemistry of rock samples from the National Geochemical Database: U.S. Geological Survey, Reston, VA.	U.S. Geological Survey	USGS		44.1333	-103.383	0.01	69	68	67	MISC	SEDIMENTARY	UNKNOWN	UNKNOWN	LIMESTONE																		33.8
D115924		USGS		Geochemistry of rock samples from the National Geochemical Database: U.S. Geological Survey, Reston, VA.	U.S. Geological Survey	USGS		44.1333	-103.383	0.01	69	68	67	UNKNOWN	SEDIMENTARY	UNKNOWN	UNKNOWN	LIMESTONE		17.5	0.06	1.8		2.9		0.86		0.35	1.7	39.9			1.2	0.43									1.6	2500	11	10	10
D115925		USGS		Geochemistry of rock samples from the National Geochemical Database: U.S. Geological Survey, Reston, VA.	U.S. Geological Survey	USGS		47.25	-112.5	0.01	67	67	67	MISC	SEDIMENTARY	UNKNOWN	UNKNOWN	LIMESTONE																		41.5
D115925		USGS		Geochemistry of rock samples from the National Geochemical Database: U.S. Geological Survey, Reston, VA.	U.S. Geological Survey	USGS		47.25	-112.5	0.01	67	67	67	UNKNOWN	SEDIMENTARY	UNKNOWN	UNKNOWN	LIMESTONE		3.2	0.06	0.15		0.5		0.48		0.01	2.8	48.9			0.46	0.03									0.78	350	5.2	3.7	1.6
D115926		USGS		Geochemistry of rock samples from the National Geochemical Database: U.S. Geological Survey, Reston, VA.	U.S. Geological Survey	USGS		44.3833	-103.633	0.01	69	68	67	MISC	SEDIMENTARY	UNKNOWN	UNKNOWN	LIMESTONE																		22.4
D115926		USGS		Geochemistry of rock samples from the National Geochemical Database: U.S. Geological Survey, Reston, VA.	U.S. Geological Survey	USGS		44.3833	-103.633	0.01	69	68	67	UNKNOWN	SEDIMENTARY	UNKNOWN	UNKNOWN	LIMESTONE		37.5	0.35	5.4		2		0.6		0.15	1.4	27.1		0.89	3.1	0.48									1.7	860	12	8.6	3.8
D115927		USGS		Geochemistry of rock samples from the National Geochemical Database: U.S. Geological Survey, Reston, VA.	U.S. Geological Survey	USGS		45.5	-112.5	0.01	67	67	67	MISC	SEDIMENTARY	UNKNOWN	UNKNOWN	LIMESTONE																		45.6
D115927		USGS		Geochemistry of rock samples from the National Geochemical Database: U.S. Geological Survey, Reston, VA.	U.S. Geological Survey	USGS		45.5	-112.5	0.01	67	67	67	UNKNOWN	SEDIMENTARY	UNKNOWN	UNKNOWN	LIMESTONE		1.6	0.02	0.1		0.17		0.18		0.02	21.3	30			0.13	0.02									0.25	220	2.3	2.3	0.77		51
D115928		USGS		Geochemistry of rock samples from the National Geochemical Database: U.S. Geological Survey, Reston, VA.	U.S. Geological Survey	USGS		41.5	-111.633	0.01	67	67	67	MISC	SEDIMENTARY	UNKNOWN	UNKNOWN	LIMESTONE																		40.7
D115928		USGS		Geochemistry of rock samples from the National Geochemical Database: U.S. Geological Survey, Reston, VA.	U.S. Geological Survey	USGS		41.5	-111.633	0.01	67	67	67	UNKNOWN	SEDIMENTARY	UNKNOWN	UNKNOWN	LIMESTONE		3	0.1	0.9		0.55		0.3		0.01	2.2	48.7			0.83	0.1									0.51	150	4.2	2.5	1.5
D115930		USGS		Geochemistry of rock samples from the National Geochemical Database: U.S. Geological Survey, Reston, VA.	U.S. Geological Survey	USGS		45.6333	-112.5	0.01	67	67	67	MISC	SEDIMENTARY	UNKNOWN	UNKNOWN	LIMESTONE																		46.8
D115930		USGS		Geochemistry of rock samples from the National Geochemical Database: U.S. Geological Survey, Reston, VA.	U.S. Geological Survey	USGS		45.6333	-112.5	0.01	67	67	67	UNKNOWN	SEDIMENTARY	UNKNOWN	UNKNOWN	LIMESTONE		0.5	0.02	0.1		0.31		0.34		0.05	21.7	30.5			0.13	0.01									0.44	300		2.7			48
D115931		USGS		Geochemistry of rock samples from the National Geochemical Database: U.S. Geological Survey, Reston, VA.	U.S. Geological Survey	USGS		41.5	-111.633	0.01	67	67	67	MISC	SEDIMENTARY	UNKNOWN	UNKNOWN	LIMESTONE																		32.2
D115931		USGS		Geochemistry of rock samples from the National Geochemical Database: U.S. Geological Survey, Reston, VA.	U.S. Geological Survey	USGS		41.5	-111.633	0.01	67	67	67	UNKNOWN	SEDIMENTARY	UNKNOWN	UNKNOWN	LIMESTONE		27.1	0.15	2.4		0.52		0.6		0.04	14.5	19.7			1.4	0.07									0.76	260	4.6	3.7	4.1		76
D115932		USGS		Geochemistry of rock samples from the National Geochemical Database: U.S. Geological Survey, Reston, VA.	U.S. Geological Survey	USGS		33	-107.133	0.01	69	69	69	MISC	SEDIMENTARY	UNKNOWN	UNKNOWN	LIMESTONE																		32
D115932		USGS		Geochemistry of rock samples from the National Geochemical Database: U.S. Geological Survey, Reston, VA.	U.S. Geological Survey	USGS		33	-107.133	0.01	69	69	69	UNKNOWN	SEDIMENTARY	UNKNOWN	UNKNOWN	LIMESTONE		21.4	0.3	2.8		0.7		0.4		0.01	0.5	40.2			1.4	0.29									0.77	300	3.8	3.4	0.85
D115933		USGS		Geochemistry of rock samples from the National Geochemical Database: U.S. Geological Survey, Reston, VA.	U.S. Geological Survey	USGS		32.8833	-110.633	0.01	69	68	67	MISC	SEDIMENTARY	UNKNOWN	UNKNOWN	LIMESTONE																		36.4
D115933		USGS		Geochemistry of rock samples from the National Geochemical Database: U.S. Geological Survey, Reston, VA.	U.S. Geological Survey	USGS		32.8833	-110.633	0.01	69	68	67	UNKNOWN	SEDIMENTARY	UNKNOWN	UNKNOWN	LIMESTONE		17.8	0.12	2.1		1.6		0.06		0.06	10.6	28.6			0.67	0.05									0.92	310	9	5.3	2		51
D115934		USGS		Geochemistry of rock samples from the National Geochemical Database: U.S. Geological Survey, Reston, VA.	U.S. Geological Survey	USGS		38.8833	-104.883	0.01	69	69	69	MISC	SEDIMENTARY	UNKNOWN	UNKNOWN	LIMESTONE																		40.8
D115934		USGS		Geochemistry of rock samples from the National Geochemical Database: U.S. Geological Survey, Reston, VA.	U.S. Geological Survey	USGS		38.8833	-104.883	0.01	69	69	69	UNKNOWN	SEDIMENTARY	UNKNOWN	UNKNOWN	LIMESTONE		7.2	0.07	1.3		0.37		0.38		0.05	11.3	37.7			0.88	0.05									0.92	700			5
D115935		USGS		Geochemistry of rock samples from the National Geochemical Database: U.S. Geological Survey, Reston, VA.	U.S. Geological Survey	USGS		36.75	-115.25	0.01	67	67	67	MISC	SEDIMENTARY	UNKNOWN	UNKNOWN	LIMESTONE																		43.5
D115935		USGS		Geochemistry of rock samples from the National Geochemical Database: U.S. Geological Survey, Reston, VA.	U.S. Geological Survey	USGS		36.75	-115.25	0.01	67	67	67	UNKNOWN	SEDIMENTARY	UNKNOWN	UNKNOWN	LIMESTONE		0.7		0.19		0.26		0.02			1.3	51.6			0.23										0.054	21					65
D115941		USGS		Geochemistry of rock samples from the National Geochemical Database: U.S. Geological Survey, Reston, VA.	U.S. Geological Survey	USGS		43	-112.133	0.01	69	68	67	MISC	SEDIMENTARY	UNKNOWN	UNKNOWN	LIMESTONE																		46
D115941		USGS		Geochemistry of rock samples from the National Geochemical Database: U.S. Geological Survey, Reston, VA.	U.S. Geological Survey	USGS		43	-112.133	0.01	69	68	67	UNKNOWN	SEDIMENTARY	UNKNOWN	UNKNOWN	LIMESTONE		0.8	0.02	0.1		0.65		0.1		0.01	18.1	35.2			0.11	0.06									0.42	190	3.3	2.7	5.9		85
D115943		USGS		Geochemistry of rock samples from the National Geochemical Database: U.S. Geological Survey, Reston, VA.	U.S. Geological Survey	USGS		43.3833	-108.133	0.01	67	67	67	MISC	SEDIMENTARY	UNKNOWN	UNKNOWN	LIMESTONE																		42.9
D115943		USGS		Geochemistry of rock samples from the National Geochemical Database: U.S. Geological Survey, Reston, VA.	U.S. Geological Survey	USGS		43.3833	-108.133	0.01	67	67	67	UNKNOWN	SEDIMENTARY	UNKNOWN	UNKNOWN	LIMESTONE		1.4	0.01	0.4		0.38		0.12		0.01	1.6	51.7		0.11	0.38	0.04									0.29	310	2.2		0.93		53
D115944		USGS		Geochemistry of rock samples from the National Geochemical Database: U.S. Geological Survey, Reston, VA.	U.S. Geological Survey	USGS		39.3833	-115.883	0.01	67	67	67	MISC	SEDIMENTARY	UNKNOWN	UNKNOWN	LIMESTONE																		43.6
D115944		USGS		Geochemistry of rock samples from the National Geochemical Database: U.S. Geological Survey, Reston, VA.	U.S. Geological Survey	USGS		39.3833	-115.883	0.01	67	67	67	UNKNOWN	SEDIMENTARY	UNKNOWN	UNKNOWN	LIMESTONE								0.12			0.56	54.7		0.08												93					170
D115946		USGS		Geochemistry of rock samples from the National Geochemical Database: U.S. Geological Survey, Reston, VA.	U.S. Geological Survey	USGS		32.8833	-110.633	0.01	69	68	67	MISC	SEDIMENTARY	UNKNOWN	UNKNOWN	LIMESTONE																		41.5
D115946		USGS		Geochemistry of rock samples from the National Geochemical Database: U.S. Geological Survey, Reston, VA.	U.S. Geological Survey	USGS		32.8833	-110.633	0.01	69	68	67	UNKNOWN	SEDIMENTARY	UNKNOWN	UNKNOWN	LIMESTONE		3.1	0.01	0.2		0.4		0.06		0.01	1.9	51.2			0.24	0.01									0.15	88					35
D115947		USGS		Geochemistry of rock samples from the National Geochemical Database: U.S. Geological Survey, Reston, VA.	U.S. Geological Survey	USGS		44.3833	-103.633	0.01	69	68	67	MISC	SEDIMENTARY	UNKNOWN	UNKNOWN	LIMESTONE																		35.9
D115947		USGS		Geochemistry of rock samples from the National Geochemical Database: U.S. Geological Survey, Reston, VA.	U.S. Geological Survey	USGS		44.3833	-103.633	0.01	69	68	67	UNKNOWN	SEDIMENTARY	UNKNOWN	UNKNOWN	LIMESTONE		10	0.07	1.9		2.6		0.46		0.41	0.7	45.1			1.6	0.31									1.4	3100	13	24	13
D115949		USGS		Geochemistry of rock samples from the National Geochemical Database: U.S. Geological Survey, Reston, VA.	U.S. Geological Survey	USGS		45.8833	-111.25	0.01	67	67	67	MISC	SEDIMENTARY	UNKNOWN	UNKNOWN	LIMESTONE																		42.9
D115949		USGS		Geochemistry of rock samples from the National Geochemical Database: U.S. Geological Survey, Reston, VA.	U.S. Geological Survey	USGS		45.8833	-111.25	0.01	67	67	67	UNKNOWN	SEDIMENTARY	UNKNOWN	UNKNOWN	LIMESTONE		1.3	0.02	0.4		0.47		0.08			0.81	54.3			0.14	0.03									0.41	270	2.5	2	2.6		210
D115950		USGS		Geochemistry of rock samples from the National Geochemical Database: U.S. Geological Survey, Reston, VA.	U.S. Geological Survey	USGS		32.8833	-110.633	0.01	69	68	67	MISC	SEDIMENTARY	UNKNOWN	UNKNOWN	LIMESTONE																		41.5
D115950		USGS		Geochemistry of rock samples from the National Geochemical Database: U.S. Geological Survey, Reston, VA.	U.S. Geological Survey	USGS		32.8833	-110.633	0.01	69	68	67	UNKNOWN	SEDIMENTARY	UNKNOWN	UNKNOWN	LIMESTONE		3.4	0.01	0.2		0.32		0.08		0.01	1.5	51.1			0.21	0.01									0.16	90			0.54		35
D115951		USGS		Geochemistry of rock samples from the National Geochemical Database: U.S. Geological Survey, Reston, VA.	U.S. Geological Survey	USGS		34.5	-115.383	0.01	67	67	67	MISC	SEDIMENTARY	UNKNOWN	UNKNOWN	LIMESTONE																		9.3
D115951		USGS		Geochemistry of rock samples from the National Geochemical Database: U.S. Geological Survey, Reston, VA.	U.S. Geological Survey	USGS		34.5	-115.383	0.01	67	67	67	UNKNOWN	SEDIMENTARY	UNKNOWN	UNKNOWN	LIMESTONE		64.2	0.38	8.4		2.2		0.2		0.12	3.9	5.6		2.3	3.1	0.16									2.5	500		5	5
D115952		USGS		Geochemistry of rock samples from the National Geochemical Database: U.S. Geological Survey, Reston, VA.	U.S. Geological Survey	USGS		44.1333	-103.383	0.01	69	68	67	MISC	SEDIMENTARY	UNKNOWN	UNKNOWN	LIMESTONE																		36.2
D115952		USGS		Geochemistry of rock samples from the National Geochemical Database: U.S. Geological Survey, Reston, VA.	U.S. Geological Survey	USGS		44.1333	-103.383	0.01	69	68	67	UNKNOWN	SEDIMENTARY	UNKNOWN	UNKNOWN	LIMESTONE		8.6	0.07	2.4		1.7		0.7		0.31	1.5	44.5			1.4	0.32									1.1	1300	2.7	5.2	8.3
D115954		USGS		Geochemistry of rock samples from the National Geochemical Database: U.S. Geological Survey, Reston, VA.	U.S. Geological Survey	USGS		38.8833	-104.883	0.01	69	69	69	MISC	SEDIMENTARY	UNKNOWN	UNKNOWN	LIMESTONE																		40.8
D115954		USGS		Geochemistry of rock samples from the National Geochemical Database: U.S. Geological Survey, Reston, VA.	U.S. Geological Survey	USGS		38.8833	-104.883	0.01	69	69	69	UNKNOWN	SEDIMENTARY	UNKNOWN	UNKNOWN	LIMESTONE		6.2	0.07	1.1		0.52		0.38		0.04	10.8	37.8		0.29	0.88	0.05									1	620			7
D115955		USGS		Geochemistry of rock samples from the National Geochemical Database: U.S. Geological Survey, Reston, VA.	U.S. Geological Survey	USGS		38.8833	-104.883	0.01	69	69	69	MISC	SEDIMENTARY	UNKNOWN	UNKNOWN	LIMESTONE																		40.9
D115955		USGS		Geochemistry of rock samples from the National Geochemical Database: U.S. Geological Survey, Reston, VA.	U.S. Geological Survey	USGS		38.8833	-104.883	0.01	69	69	69	UNKNOWN	SEDIMENTARY	UNKNOWN	UNKNOWN	LIMESTONE		9.1	0.07	1.6		0.58		0.38		0.04	11.9	35.7			0.83	0.05									1	680			7
D115956		USGS		Geochemistry of rock samples from the National Geochemical Database: U.S. Geological Survey, Reston, VA.	U.S. Geological Survey	USGS		38.8833	-104.883	0.01	69	69	69	MISC	SEDIMENTARY	UNKNOWN	UNKNOWN	LIMESTONE																		40.8
D115956		USGS		Geochemistry of rock samples from the National Geochemical Database: U.S. Geological Survey, Reston, VA.	U.S. Geological Survey	USGS		38.8833	-104.883	0.01	69	69	69	UNKNOWN	SEDIMENTARY	UNKNOWN	UNKNOWN	LIMESTONE		6.7	0.07	1		0.54		0.42		0.04	12.4	34.5		1.3	2.8	0.05									0.96	660			7
D115957		USGS		Geochemistry of rock samples from the National Geochemical Database: U.S. Geological Survey, Reston, VA.	U.S. Geological Survey	USGS		36.75	-115.25	0.01	67	67	67	MISC	SEDIMENTARY	UNKNOWN	UNKNOWN	LIMESTONE																		34.2
D115957		USGS		Geochemistry of rock samples from the National Geochemical Database: U.S. Geological Survey, Reston, VA.	U.S. Geological Survey	USGS		36.75	-115.25	0.01	67	67	67	UNKNOWN	SEDIMENTARY	UNKNOWN	UNKNOWN	LIMESTONE		22.9	0.02					0.06			5.4	36.5		0.12	0.11											22					50
D115958		USGS		Geochemistry of rock samples from the National Geochemical Database: U.S. Geological Survey, Reston, VA.	U.S. Geological Survey	USGS		47.8833	-108.5	0.01	69	68	67	MISC	SEDIMENTARY	UNKNOWN	UNKNOWN	LIMESTONE																		21
D115958		USGS		Geochemistry of rock samples from the National Geochemical Database: U.S. Geological Survey, Reston, VA.	U.S. Geological Survey	USGS		47.8833	-108.5	0.01	69	68	67	UNKNOWN	SEDIMENTARY	UNKNOWN	UNKNOWN	LIMESTONE		45.6	0.23	4.3		1.4		0.5		0.1	1	22		0.35	1.4	0.24									0.9	500	3.8	7.5	2.2		64
D115959		USGS		Geochemistry of rock samples from the National Geochemical Database: U.S. Geological Survey, Reston, VA.	U.S. Geological Survey	USGS		45.75	-111.75	0.01	67	67	67	MISC	SEDIMENTARY	UNKNOWN	UNKNOWN	LIMESTONE																		41.8
D115959		USGS		Geochemistry of rock samples from the National Geochemical Database: U.S. Geological Survey, Reston, VA.	U.S. Geological Survey	USGS		45.75	-111.75	0.01	67	67	67	UNKNOWN	SEDIMENTARY	UNKNOWN	UNKNOWN	LIMESTONE		2.8	0.06	0.6		0.48		0.08		0.01	1	50.6		0.06	0.56	0.03									0.28	170	5.2	3	4.5
D115960		USGS		Geochemistry of rock samples from the National Geochemical Database: U.S. Geological Survey, Reston, VA.	U.S. Geological Survey	USGS		44	-103.25	0.01	69	68	67	MISC	SEDIMENTARY	UNKNOWN	UNKNOWN	LIMESTONE																		41.3
D115960		USGS		Geochemistry of rock samples from the National Geochemical Database: U.S. Geological Survey, Reston, VA.	U.S. Geological Survey	USGS		44	-103.25	0.01	69	68	67	UNKNOWN	SEDIMENTARY	UNKNOWN	UNKNOWN	LIMESTONE		1.7	0.01	0.6		0.47		0.28		0.22	1.7	51.4			0.34	0.06									0.45	1500	3	7.5	21
D115961		USGS		Geochemistry of rock samples from the National Geochemical Database: U.S. Geological Survey, Reston, VA.	U.S. Geological Survey	USGS		44.1333	-103.383	0.01	69	68	67	MISC	SEDIMENTARY	UNKNOWN	UNKNOWN	LIMESTONE																		36.2
D115967		USGS		Geochemistry of rock samples from the National Geochemical Database: U.S. Geological Survey, Reston, VA.	U.S. Geological Survey	USGS		32.1333	-109.633	0.01	69	68	67	UNKNOWN	SEDIMENTARY	UNKNOWN	UNKNOWN	LIMESTONE		6	0.02	0.1		0.17		0.38		0.08	20.1	30.8			0.18	0.14									0.39	230			0.84		100
D115961		USGS		Geochemistry of rock samples from the National Geochemical Database: U.S. Geological Survey, Reston, VA.	U.S. Geological Survey	USGS		44.1333	-103.383	0.01	69	68	67	UNKNOWN	SEDIMENTARY	UNKNOWN	UNKNOWN	LIMESTONE		11	0.07	2		1.6		0.76			1.1	45.5		0.08	0.27	0.32									1.3	2000	5.3	7.8	7.6
D115962		USGS		Geochemistry of rock samples from the National Geochemical Database: U.S. Geological Survey, Reston, VA.	U.S. Geological Survey	USGS		32.75	-107.883	0.01	69	69	69	MISC	SEDIMENTARY	UNKNOWN	UNKNOWN	LIMESTONE																		42.3
D115962		USGS		Geochemistry of rock samples from the National Geochemical Database: U.S. Geological Survey, Reston, VA.	U.S. Geological Survey	USGS		32.75	-107.883	0.01	69	69	69	UNKNOWN	SEDIMENTARY	UNKNOWN	UNKNOWN	LIMESTONE		8.7	0.07	0.95		2		0.24		0.31	17.8	26.8			1.4										0.3	410		2.8	0.79		230
D115963		USGS		Geochemistry of rock samples from the National Geochemical Database: U.S. Geological Survey, Reston, VA.	U.S. Geological Survey	USGS		38.8833	-104.883	0.01	69	69	69	MISC	SEDIMENTARY	UNKNOWN	UNKNOWN	LIMESTONE																		40.7
D115963		USGS		Geochemistry of rock samples from the National Geochemical Database: U.S. Geological Survey, Reston, VA.	U.S. Geological Survey	USGS		38.8833	-104.883	0.01	69	69	69	UNKNOWN	SEDIMENTARY	UNKNOWN	UNKNOWN	LIMESTONE		7.1	0.07	1.5		0.52		0.38		0.05	11.7	37.6			1.4	0.05									1	780			7
D115964		USGS		Geochemistry of rock samples from the National Geochemical Database: U.S. Geological Survey, Reston, VA.	U.S. Geological Survey	USGS		43.3833	-108.133	0.01	67	67	67	MISC	SEDIMENTARY	UNKNOWN	UNKNOWN	LIMESTONE																		36.1
D115964		USGS		Geochemistry of rock samples from the National Geochemical Database: U.S. Geological Survey, Reston, VA.	U.S. Geological Survey	USGS		43.3833	-108.133	0.01	67	67	67	UNKNOWN	SEDIMENTARY	UNKNOWN	UNKNOWN	LIMESTONE		10.2	0.07	1.5		1.1		1.1		0.11	4.9	42.2			1.2	0.05									1.1	720	2.2	2.2	1.3		38
D115965		USGS		Geochemistry of rock samples from the National Geochemical Database: U.S. Geological Survey, Reston, VA.	U.S. Geological Survey	USGS		38.8833	-104.883	0.01	69	69	69	MISC	SEDIMENTARY	UNKNOWN	UNKNOWN	LIMESTONE																		40.6
D115965		USGS		Geochemistry of rock samples from the National Geochemical Database: U.S. Geological Survey, Reston, VA.	U.S. Geological Survey	USGS		38.8833	-104.883	0.01	69	69	69	UNKNOWN	SEDIMENTARY	UNKNOWN	UNKNOWN	LIMESTONE		7.1	0.07	1.1		0.35		0.4		0.05	12.3	36.3			1.4	0.05									0.97	750			7
D115966		USGS		Geochemistry of rock samples from the National Geochemical Database: U.S. Geological Survey, Reston, VA.	U.S. Geological Survey	USGS		37.25	-115.633	0.01	67	67	67	MISC	SEDIMENTARY	UNKNOWN	UNKNOWN	LIMESTONE																		41.5
D115966		USGS		Geochemistry of rock samples from the National Geochemical Database: U.S. Geological Survey, Reston, VA.	U.S. Geological Survey	USGS		37.25	-115.633	0.01	67	67	67	UNKNOWN	SEDIMENTARY	UNKNOWN	UNKNOWN	LIMESTONE		3.9	0.05	0.3		0.13		0.16			1.3	57.8		0.08	0.33										0.17	34					32
D115967		USGS		Geochemistry of rock samples from the National Geochemical Database: U.S. Geological Survey, Reston, VA.	U.S. Geological Survey	USGS		32.1333	-109.633	0.01	69	68	67	MISC	SEDIMENTARY	UNKNOWN	UNKNOWN	LIMESTONE																		43.3
D115968		USGS		Geochemistry of rock samples from the National Geochemical Database: U.S. Geological Survey, Reston, VA.	U.S. Geological Survey	USGS		45.6333	-112.633	0.01	67	67	67	MISC	SEDIMENTARY	UNKNOWN	UNKNOWN	LIMESTONE																		46.2
D115968		USGS		Geochemistry of rock samples from the National Geochemical Database: U.S. Geological Survey, Reston, VA.	U.S. Geological Survey	USGS		45.6333	-112.633	0.01	67	67	67	UNKNOWN	SEDIMENTARY	UNKNOWN	UNKNOWN	LIMESTONE		0.8	0.07	0.4		0.08		0.62		0.05	22	31			0.2	0.03									0.4	200			0.72		29
D115969		USGS		Geochemistry of rock samples from the National Geochemical Database: U.S. Geological Survey, Reston, VA.	U.S. Geological Survey	USGS		32.75	-107.883	0.01	69	69	69	MISC	SEDIMENTARY	UNKNOWN	UNKNOWN	LIMESTONE																		40.7
D115969		USGS		Geochemistry of rock samples from the National Geochemical Database: U.S. Geological Survey, Reston, VA.	U.S. Geological Survey	USGS		32.75	-107.883	0.01	69	69	69	UNKNOWN	SEDIMENTARY	UNKNOWN	UNKNOWN	LIMESTONE		5	0.03	0.8		0.46		0.1		0.01	2.2	47.9			0.66	0.02									0.21	48	2.1	2.5	1
D115970		USGS		Geochemistry of rock samples from the National Geochemical Database: U.S. Geological Survey, Reston, VA.	U.S. Geological Survey	USGS		45.75	-111.75	0.01	67	67	67	MISC	SEDIMENTARY	UNKNOWN	UNKNOWN	LIMESTONE																		43.5
D115970		USGS		Geochemistry of rock samples from the National Geochemical Database: U.S. Geological Survey, Reston, VA.	U.S. Geological Survey	USGS		45.75	-111.75	0.01	67	67	67	UNKNOWN	SEDIMENTARY	UNKNOWN	UNKNOWN	LIMESTONE		0.29				0.24		0.04			0.7	53.6		0.08	0.32											43			0.74		42
D115971		USGS		Geochemistry of rock samples from the National Geochemical Database: U.S. Geological Survey, Reston, VA.	U.S. Geological Survey	USGS		32.8833	-110.633	0.01	69	68	67	MISC	SEDIMENTARY	UNKNOWN	UNKNOWN	LIMESTONE																		36.6
D115971		USGS		Geochemistry of rock samples from the National Geochemical Database: U.S. Geological Survey, Reston, VA.	U.S. Geological Survey	USGS		32.8833	-110.633	0.01	69	68	67	UNKNOWN	SEDIMENTARY	UNKNOWN	UNKNOWN	LIMESTONE		17.8	0.15	2.4		1.3		0.06		0.05	10.7	30			0.64	0.04									0.67	250	9.7	6.6	2.3		42
D115972		USGS		Geochemistry of rock samples from the National Geochemical Database: U.S. Geological Survey, Reston, VA.	U.S. Geological Survey	USGS		45.6333	-112.5	0.01	67	67	67	MISC	SEDIMENTARY	UNKNOWN	UNKNOWN	LIMESTONE																		46.4
D115972		USGS		Geochemistry of rock samples from the National Geochemical Database: U.S. Geological Survey, Reston, VA.	U.S. Geological Survey	USGS		45.6333	-112.5	0.01	67	67	67	UNKNOWN	SEDIMENTARY	UNKNOWN	UNKNOWN	LIMESTONE		0.5	0.01	0.1		0.23		0.32		0.05	21.9	31.9			0.13	0.01									0.37	230	2.3		1.5
D115973		USGS		Geochemistry of rock samples from the National Geochemical Database: U.S. Geological Survey, Reston, VA.	U.S. Geological Survey	USGS		39.25	-112.133	0.01	69	68	67	MISC	SEDIMENTARY	UNKNOWN	UNKNOWN	LIMESTONE																		38.6
D115973		USGS		Geochemistry of rock samples from the National Geochemical Database: U.S. Geological Survey, Reston, VA.	U.S. Geological Survey	USGS		39.25	-112.133	0.01	69	68	67	UNKNOWN	SEDIMENTARY	UNKNOWN	UNKNOWN	LIMESTONE		8	0.03	0.6		0.34		0.26		0.01	1.8	49.9			0.32	0.12									0.32	140	3.6	3.2	2		46
D115974		USGS		Geochemistry of rock samples from the National Geochemical Database: U.S. Geological Survey, Reston, VA.	U.S. Geological Survey	USGS		36	-112	0.01	67	67	67	MISC	SEDIMENTARY	UNKNOWN	UNKNOWN	LIMESTONE																		41.3
D115974		USGS		Geochemistry of rock samples from the National Geochemical Database: U.S. Geological Survey, Reston, VA.	U.S. Geological Survey	USGS		36	-112	0.01	67	67	67	UNKNOWN	SEDIMENTARY	UNKNOWN	UNKNOWN	LIMESTONE		2.5	0.01	0.7		0.59		0.36		0.02	2.7	50.6			0.49	0.01									0.65	350	4.7	3.4	2.5
D115975		USGS		Geochemistry of rock samples from the National Geochemical Database: U.S. Geological Survey, Reston, VA.	U.S. Geological Survey	USGS		43.25	-107.883	0.01	67	67	67	MISC	SEDIMENTARY	UNKNOWN	UNKNOWN	LIMESTONE																		34
D115975		USGS		Geochemistry of rock samples from the National Geochemical Database: U.S. Geological Survey, Reston, VA.	U.S. Geological Survey	USGS		43.25	-107.883	0.01	67	67	67	UNKNOWN	SEDIMENTARY	UNKNOWN	UNKNOWN	LIMESTONE		17.8	0.08	2.3		1.2		0.18		0.12	0.4	43			1.5	0.17									0.67	860	3.5	2.8	2.2
D115976		USGS		Geochemistry of rock samples from the National Geochemical Database: U.S. Geological Survey, Reston, VA.	U.S. Geological Survey	USGS		34.8833	-112.883	0.01	67	67	67	MISC	SEDIMENTARY	UNKNOWN	UNKNOWN	LIMESTONE																		36.8
D115980		USGS		Geochemistry of rock samples from the National Geochemical Database: U.S. Geological Survey, Reston, VA.	U.S. Geological Survey	USGS		39.5	-107.383	0.01	67	67	67	MISC	SEDIMENTARY	UNKNOWN	UNKNOWN	LIMESTONE																		38.3
D115976		USGS		Geochemistry of rock samples from the National Geochemical Database: U.S. Geological Survey, Reston, VA.	U.S. Geological Survey	USGS		34.8833	-112.883	0.01	67	67	67	UNKNOWN	SEDIMENTARY	UNKNOWN	UNKNOWN	LIMESTONE		15	0.3	4.3		3.3		2.8		0.31	15.1	20.7			1.5	0.05									1.3	1200	8	8.5	5.9		42
D115979		USGS		Geochemistry of rock samples from the National Geochemical Database: U.S. Geological Survey, Reston, VA.	U.S. Geological Survey	USGS		42.75	-108	0.01	67	67	67	UNKNOWN	SEDIMENTARY	UNKNOWN	UNKNOWN	LIMESTONE																									0.6	270			3
D115980		USGS		Geochemistry of rock samples from the National Geochemical Database: U.S. Geological Survey, Reston, VA.	U.S. Geological Survey	USGS		39.5	-107.383	0.01	67	67	67	UNKNOWN	SEDIMENTARY	UNKNOWN	UNKNOWN	LIMESTONE		14.2	0.1	3.1		1.1		0.78		0.06	16.4	23.2		0.12	1.4	0.08									0.96	230	5.1	5.7	3.5		38
D115983		USGS		Geochemistry of rock samples from the National Geochemical Database: U.S. Geological Survey, Reston, VA.	U.S. Geological Survey	USGS		39	-114.5	0.01	67	67	67	MISC	SEDIMENTARY	UNKNOWN	UNKNOWN	LIMESTONE																		43.6
D115983		USGS		Geochemistry of rock samples from the National Geochemical Database: U.S. Geological Survey, Reston, VA.	U.S. Geological Survey	USGS		39	-114.5	0.01	67	67	67	UNKNOWN	SEDIMENTARY	UNKNOWN	UNKNOWN	LIMESTONE		0.5	0.01	0.1		0.29		0.06		0.01	4	50.2		1.4	0.22	0.02									0.082	44		2.5
D115984		USGS		Geochemistry of rock samples from the National Geochemical Database: U.S. Geological Survey, Reston, VA.	U.S. Geological Survey	USGS		39.8833	-113.75	0.01	67	67	67	MISC	SEDIMENTARY	UNKNOWN	UNKNOWN	LIMESTONE																		14.9
D115984		USGS		Geochemistry of rock samples from the National Geochemical Database: U.S. Geological Survey, Reston, VA.	U.S. Geological Survey	USGS		39.8833	-113.75	0.01	67	67	67	UNKNOWN	SEDIMENTARY	UNKNOWN	UNKNOWN	LIMESTONE		43.9	0.54	13.5		1.9		2.3		0.04	4	14		0.85	4.7	0.09									1.7	200	25	13	73		61
D115986		USGS		Geochemistry of rock samples from the National Geochemical Database: U.S. Geological Survey, Reston, VA.	U.S. Geological Survey	USGS		38.8833	-104.883	0.01	69	69	69	MISC	SEDIMENTARY	UNKNOWN	UNKNOWN	LIMESTONE																		40.8
D115986		USGS		Geochemistry of rock samples from the National Geochemical Database: U.S. Geological Survey, Reston, VA.	U.S. Geological Survey	USGS		38.8833	-104.883	0.01	69	69	69	UNKNOWN	SEDIMENTARY	UNKNOWN	UNKNOWN	LIMESTONE		6.2	0.07	1		0.5		0.4		0.06	12.9	35.4		0.1	0.88	0.05									0.99	760			7
D115987		USGS		Geochemistry of rock samples from the National Geochemical Database: U.S. Geological Survey, Reston, VA.	U.S. Geological Survey	USGS		31.5	-110.383	0.01	69	68	67	MISC	SEDIMENTARY	UNKNOWN	UNKNOWN	LIMESTONE																		23.4
D115987		USGS		Geochemistry of rock samples from the National Geochemical Database: U.S. Geological Survey, Reston, VA.	U.S. Geological Survey	USGS		31.5	-110.383	0.01	69	68	67	UNKNOWN	SEDIMENTARY	UNKNOWN	UNKNOWN	LIMESTONE		32.4	0.47	8.6				0.48		0.07	1.7	27.5		0.1	3.2	0.16									1.5	480	9.2	7.2	5.5
D115988		USGS		Geochemistry of rock samples from the National Geochemical Database: U.S. Geological Survey, Reston, VA.	U.S. Geological Survey	USGS		40	-113.75	0.01	67	67	67	MISC	SEDIMENTARY	UNKNOWN	UNKNOWN	LIMESTONE																		33.6
D115988		USGS		Geochemistry of rock samples from the National Geochemical Database: U.S. Geological Survey, Reston, VA.	U.S. Geological Survey	USGS		40	-113.75	0.01	67	67	67	UNKNOWN	SEDIMENTARY	UNKNOWN	UNKNOWN	LIMESTONE		16.2	0.15	4.9		1.2		1.2			1.9	39.7		0.35	0.87	0.04									1.2	150	7.5	6	4.2		71
D115989		USGS		Geochemistry of rock samples from the National Geochemical Database: U.S. Geological Survey, Reston, VA.	U.S. Geological Survey	USGS		38.8833	-104.883	0.01	69	69	69	MISC	SEDIMENTARY	UNKNOWN	UNKNOWN	LIMESTONE																		40.8
D115989		USGS		Geochemistry of rock samples from the National Geochemical Database: U.S. Geological Survey, Reston, VA.	U.S. Geological Survey	USGS		38.8833	-104.883	0.01	69	69	69	UNKNOWN	SEDIMENTARY	UNKNOWN	UNKNOWN	LIMESTONE		7.1	0.07	1.4		0.46		0.4		0.05	11.7	36.3		0.1	0.88	0.05									1	790			7
D115990		USGS		Geochemistry of rock samples from the National Geochemical Database: U.S. Geological Survey, Reston, VA.	U.S. Geological Survey	USGS		44.3833	-103.633	0.01	69	68	67	UNKNOWN	SEDIMENTARY	UNKNOWN	UNKNOWN	LIMESTONE																									3.4	700		5	2
D115991		USGS		Geochemistry of rock samples from the National Geochemical Database: U.S. Geological Survey, Reston, VA.	U.S. Geological Survey	USGS		38.8833	-104.883	0.01	69	69	69	MISC	SEDIMENTARY	UNKNOWN	UNKNOWN	LIMESTONE																		40.7
D115991		USGS		Geochemistry of rock samples from the National Geochemical Database: U.S. Geological Survey, Reston, VA.	U.S. Geological Survey	USGS		38.8833	-104.883	0.01	69	69	69	UNKNOWN	SEDIMENTARY	UNKNOWN	UNKNOWN	LIMESTONE		7.3	0.07	0.6		0.52		0.38		0.05	11.7	36.4			0.88	0.05									1	780			7
D115992		USGS		Geochemistry of rock samples from the National Geochemical Database: U.S. Geological Survey, Reston, VA.	U.S. Geological Survey	USGS		45.5	-112.5	0.01	67	67	67	MISC	SEDIMENTARY	UNKNOWN	UNKNOWN	LIMESTONE																		45.7
D115992		USGS		Geochemistry of rock samples from the National Geochemical Database: U.S. Geological Survey, Reston, VA.	U.S. Geological Survey	USGS		45.5	-112.5	0.01	67	67	67	UNKNOWN	SEDIMENTARY	UNKNOWN	UNKNOWN	LIMESTONE		1.6	0.01	0.1		0.22		0.18		0.03	21.2	30		1.8	0.1	0.01									0.19	170	3.6	1.3	2.3		58
D115993		USGS		Geochemistry of rock samples from the National Geochemical Database: U.S. Geological Survey, Reston, VA.	U.S. Geological Survey	USGS		36.8833	-115.25	0.01	67	67	67	MISC	SEDIMENTARY	UNKNOWN	UNKNOWN	LIMESTONE																		41.6
D115993		USGS		Geochemistry of rock samples from the National Geochemical Database: U.S. Geological Survey, Reston, VA.	U.S. Geological Survey	USGS		36.8833	-115.25	0.01	67	67	67	UNKNOWN	SEDIMENTARY	UNKNOWN	UNKNOWN	LIMESTONE		8.9	0.01	0.1		0.09		0.06		0.01	18.2	30.6		1.6	0.19	0.01									0.063	20		1.8	1.5
D115994		USGS		Geochemistry of rock samples from the National Geochemical Database: U.S. Geological Survey, Reston, VA.	U.S. Geological Survey	USGS		32.1333	-109.5	0.01	69	68	67	MISC	SEDIMENTARY	UNKNOWN	UNKNOWN	LIMESTONE																		42.3
D115994		USGS		Geochemistry of rock samples from the National Geochemical Database: U.S. Geological Survey, Reston, VA.	U.S. Geological Survey	USGS		32.1333	-109.5	0.01	69	68	67	UNKNOWN	SEDIMENTARY	UNKNOWN	UNKNOWN	LIMESTONE		8	0.07	0.6		0.16		0.44		0.06	19	28.6		1.1	0.31	0.13									0.34	210		1.7	0.45		67
D115995		USGS		Geochemistry of rock samples from the National Geochemical Database: U.S. Geological Survey, Reston, VA.	U.S. Geological Survey	USGS		32.75	-107.883	0.01	69	69	69	MISC	SEDIMENTARY	UNKNOWN	UNKNOWN	LIMESTONE																		45
D115995		USGS		Geochemistry of rock samples from the National Geochemical Database: U.S. Geological Survey, Reston, VA.	U.S. Geological Survey	USGS		32.75	-107.883	0.01	69	69	69	UNKNOWN	SEDIMENTARY	UNKNOWN	UNKNOWN	LIMESTONE		1.4	0.01	0.2		0.69		0.06		0.15	19.4	33		1.2	0.11	0.02									0.44	520	2.7	2.2	1.7		560
D115996		USGS		Geochemistry of rock samples from the National Geochemical Database: U.S. Geological Survey, Reston, VA.	U.S. Geological Survey	USGS		38.8833	-104.883	0.01	69	69	69	MISC	SEDIMENTARY	UNKNOWN	UNKNOWN	LIMESTONE																		40.8
D115996		USGS		Geochemistry of rock samples from the National Geochemical Database: U.S. Geological Survey, Reston, VA.	U.S. Geological Survey	USGS		38.8833	-104.883	0.01	69	69	69	UNKNOWN	SEDIMENTARY	UNKNOWN	UNKNOWN	LIMESTONE		6.3	0.07	1.1		0.5		0.4		0.05	12.5	37.1		0.85	0.88	0.05									1.1				7
D115998		USGS		Geochemistry of rock samples from the National Geochemical Database: U.S. Geological Survey, Reston, VA.	U.S. Geological Survey	USGS		40.5	-111.5	0.01	67	67	67	UNKNOWN	SEDIMENTARY	UNKNOWN	UNKNOWN	LIMESTONE																									1.7	560		5	5
D116591		USGS		Geochemistry of rock samples from the National Geochemical Database: U.S. Geological Survey, Reston, VA.	U.S. Geological Survey	USGS		29.9667	-98.9667	0.01	68	68	68	MISC	SEDIMENTARY	UNKNOWN	UNKNOWN	LIMESTONE																		11.1
D116591		USGS		Geochemistry of rock samples from the National Geochemical Database: U.S. Geological Survey, Reston, VA.	U.S. Geological Survey	USGS		29.9667	-98.9667	0.01	68	68	68	UNKNOWN	SEDIMENTARY	UNKNOWN	UNKNOWN	LIMESTONE		65.1		5.44							1.39	10		0.48	1.4										2	300	100	7	50
D116592		USGS		Geochemistry of rock samples from the National Geochemical Database: U.S. Geological Survey, Reston, VA.	U.S. Geological Survey	USGS		29.9667	-98.9667	0.01	68	68	68	MISC	SEDIMENTARY	UNKNOWN	UNKNOWN	LIMESTONE																		29
D116592		USGS		Geochemistry of rock samples from the National Geochemical Database: U.S. Geological Survey, Reston, VA.	U.S. Geological Survey	USGS		29.9667	-98.9667	0.01	68	68	68	UNKNOWN	SEDIMENTARY	UNKNOWN	UNKNOWN	LIMESTONE		19.4		3.12							1.49	35.4		0.24	1.06										3	1000	500	300	100
D116593		USGS		Geochemistry of rock samples from the National Geochemical Database: U.S. Geological Survey, Reston, VA.	U.S. Geological Survey	USGS		29.9667	-98.9667	0.01	68	68	68	MISC	SEDIMENTARY	UNKNOWN	UNKNOWN	LIMESTONE																		29.9
D116593		USGS		Geochemistry of rock samples from the National Geochemical Database: U.S. Geological Survey, Reston, VA.	U.S. Geological Survey	USGS		29.9667	-98.9667	0.01	68	68	68	UNKNOWN	SEDIMENTARY	UNKNOWN	UNKNOWN	LIMESTONE		24.8		1.26							2.12	34.7		0.14	0.43										2	1500	50	50	70
D116594		USGS		Geochemistry of rock samples from the National Geochemical Database: U.S. Geological Survey, Reston, VA.	U.S. Geological Survey	USGS		29.9667	-98.9667	0.01	55	55	55	MISC	SEDIMENTARY	UNKNOWN	UNKNOWN	LIMESTONE																		27.4
D116594		USGS		Geochemistry of rock samples from the National Geochemical Database: U.S. Geological Survey, Reston, VA.	U.S. Geological Survey	USGS		29.9667	-98.9667	0.01	55	55	55	UNKNOWN	SEDIMENTARY	UNKNOWN	UNKNOWN	LIMESTONE		14		2.25							1.55	30.2		0.19	0.77									3		1500	300	70	300
D117310		USGS		Geochemistry of rock samples from the National Geochemical Database: U.S. Geological Survey, Reston, VA.	U.S. Geological Survey	USGS		36.25	-85.6333	0.01	69	69	69	UNKNOWN	SEDIMENTARY	UNKNOWN	UNKNOWN	LIMESTONE																									0.3	200			20
D117314		USGS		Geochemistry of rock samples from the National Geochemical Database: U.S. Geological Survey, Reston, VA.	U.S. Geological Survey	USGS		36.25	-85.6333	0.01	69	69	69	UNKNOWN	SEDIMENTARY	UNKNOWN	UNKNOWN	LIMESTONE																									0.7	700	15		50
D117322		USGS		Geochemistry of rock samples from the National Geochemical Database: U.S. Geological Survey, Reston, VA.	U.S. Geological Survey	USGS		36.25	-85.6333	0.01	69	69	69	UNKNOWN	SEDIMENTARY	UNKNOWN	UNKNOWN	LIMESTONE																									2	1500	30		50
D117323		USGS		Geochemistry of rock samples from the National Geochemical Database: U.S. Geological Survey, Reston, VA.	U.S. Geological Survey	USGS		36.25	-85.6333	0.01	69	69	69	UNKNOWN	SEDIMENTARY	UNKNOWN	UNKNOWN	LIMESTONE																									0.7	300	15		30
D117324		USGS		Geochemistry of rock samples from the National Geochemical Database: U.S. Geological Survey, Reston, VA.	U.S. Geological Survey	USGS		36.25	-85.6333	0.01	69	69	69	UNKNOWN	SEDIMENTARY	UNKNOWN	UNKNOWN	LIMESTONE																									2	1000	30		70
D117327		USGS		Geochemistry of rock samples from the National Geochemical Database: U.S. Geological Survey, Reston, VA.	U.S. Geological Survey	USGS		36.25	-85.6333	0.01	69	69	69	UNKNOWN	SEDIMENTARY	UNKNOWN	UNKNOWN	LIMESTONE																									0.7	1000	50		50
D117328		USGS		Geochemistry of rock samples from the National Geochemical Database: U.S. Geological Survey, Reston, VA.	U.S. Geological Survey	USGS		36.25	-85.6333	0.01	69	69	69	UNKNOWN	SEDIMENTARY	UNKNOWN	UNKNOWN	LIMESTONE																									0.7	700	20		50
D117329		USGS		Geochemistry of rock samples from the National Geochemical Database: U.S. Geological Survey, Reston, VA.	U.S. Geological Survey	USGS		36.25	-85.6333	0.01	69	69	69	UNKNOWN	SEDIMENTARY	UNKNOWN	UNKNOWN	LIMESTONE																									1.5	500	30		50
D117330		USGS		Geochemistry of rock samples from the National Geochemical Database: U.S. Geological Survey, Reston, VA.	U.S. Geological Survey	USGS		36.25	-85.6333	0.01	69	69	69	UNKNOWN	SEDIMENTARY	UNKNOWN	UNKNOWN	LIMESTONE																									1	700	20		70
D118550		USGS		Geochemistry of rock samples from the National Geochemical Database: U.S. Geological Survey, Reston, VA.	U.S. Geological Survey	USGS		40.1333	-80.25	0.01	70	70	70	UNKNOWN	SEDIMENTARY	UNKNOWN	UNKNOWN	LIMESTONE																								5	1	700	7		7
D118551		USGS		Geochemistry of rock samples from the National Geochemical Database: U.S. Geological Survey, Reston, VA.	U.S. Geological Survey	USGS		40.1333	-80.25	0.01	70	70	70	UNKNOWN	SEDIMENTARY	UNKNOWN	UNKNOWN	LIMESTONE																								1	1	1500	3		7
D118552		USGS		Geochemistry of rock samples from the National Geochemical Database: U.S. Geological Survey, Reston, VA.	U.S. Geological Survey	USGS		40.1333	-80.25	0.01	70	70	70	UNKNOWN	SEDIMENTARY	UNKNOWN	UNKNOWN	LIMESTONE																								0.15	0.2	2000			1
D118553		USGS		Geochemistry of rock samples from the National Geochemical Database: U.S. Geological Survey, Reston, VA.	U.S. Geological Survey	USGS		40.1333	-80.25	0.01	71	71	71	UNKNOWN	SEDIMENTARY	UNKNOWN	UNKNOWN	LIMESTONE																								0.7	1	2000			1.5
D118554		USGS		Geochemistry of rock samples from the National Geochemical Database: U.S. Geological Survey, Reston, VA.	U.S. Geological Survey	USGS		40.1333	-80.25	0.01	71	71	71	UNKNOWN	SEDIMENTARY	UNKNOWN	UNKNOWN	LIMESTONE																								3	1	1500	7		10
D118555		USGS		Geochemistry of rock samples from the National Geochemical Database: U.S. Geological Survey, Reston, VA.	U.S. Geological Survey	USGS		40.1333	-80.25	0.01	71	71	71	UNKNOWN	SEDIMENTARY	UNKNOWN	UNKNOWN	LIMESTONE																								3	1	700	5		2
D118556		USGS		Geochemistry of rock samples from the National Geochemical Database: U.S. Geological Survey, Reston, VA.	U.S. Geological Survey	USGS		40.1333	-80.25	0.01	71	71	71	UNKNOWN	SEDIMENTARY	UNKNOWN	UNKNOWN	LIMESTONE																								3	1	500	7		10
D118557		USGS		Geochemistry of rock samples from the National Geochemical Database: U.S. Geological Survey, Reston, VA.	U.S. Geological Survey	USGS		40.1333	-80.25	0.01	71	71	71	UNKNOWN	SEDIMENTARY	UNKNOWN	UNKNOWN	LIMESTONE																								5	0.7	300	7		7
D118558		USGS		Geochemistry of rock samples from the National Geochemical Database: U.S. Geological Survey, Reston, VA.	U.S. Geological Survey	USGS		40.1333	-80.25	0.01	71	71	71	UNKNOWN	SEDIMENTARY	UNKNOWN	UNKNOWN	LIMESTONE																								5	0.7	300	7		5
D118559		USGS		Geochemistry of rock samples from the National Geochemical Database: U.S. Geological Survey, Reston, VA.	U.S. Geological Survey	USGS		40.1333	-80.25	0.01	71	71	71	UNKNOWN	SEDIMENTARY	UNKNOWN	UNKNOWN	LIMESTONE																								3	0.7	300	7		10
D118560		USGS		Geochemistry of rock samples from the National Geochemical Database: U.S. Geological Survey, Reston, VA.	U.S. Geological Survey	USGS		40.1333	-80.25	0.01	71	71	71	UNKNOWN	SEDIMENTARY	UNKNOWN	UNKNOWN	LIMESTONE																								5	0.7	500	10		7
D118561		USGS		Geochemistry of rock samples from the National Geochemical Database: U.S. Geological Survey, Reston, VA.	U.S. Geological Survey	USGS		40.1333	-80.25	0.01	71	71	71	UNKNOWN	SEDIMENTARY	UNKNOWN	UNKNOWN	LIMESTONE																									1.5	200	30	10	50
D118562		USGS		Geochemistry of rock samples from the National Geochemical Database: U.S. Geological Survey, Reston, VA.	U.S. Geological Survey	USGS		40.1333	-80.25	0.01	71	71	71	UNKNOWN	SEDIMENTARY	UNKNOWN	UNKNOWN	LIMESTONE																								3	1	300	10		70
D118563		USGS		Geochemistry of rock samples from the National Geochemical Database: U.S. Geological Survey, Reston, VA.	U.S. Geological Survey	USGS		40.1333	-80.25	0.01	71	71	71	UNKNOWN	SEDIMENTARY	UNKNOWN	UNKNOWN	LIMESTONE																								1.5	0.7	300	5		3
D118564		USGS		Geochemistry of rock samples from the National Geochemical Database: U.S. Geological Survey, Reston, VA.	U.S. Geological Survey	USGS		40.1333	-80.25	0.01	71	71	71	UNKNOWN	SEDIMENTARY	UNKNOWN	UNKNOWN	LIMESTONE																								7	1.5	300	20	10	50
D118565		USGS		Geochemistry of rock samples from the National Geochemical Database: U.S. Geological Survey, Reston, VA.	U.S. Geological Survey	USGS		40.1333	-80.25	0.01	71	71	71	UNKNOWN	SEDIMENTARY	UNKNOWN	UNKNOWN	LIMESTONE																								0.3	1.5	500	5		3
D118566		USGS		Geochemistry of rock samples from the National Geochemical Database: U.S. Geological Survey, Reston, VA.	U.S. Geological Survey	USGS		40.1333	-80.25	0.01	71	71	71	UNKNOWN	SEDIMENTARY	UNKNOWN	UNKNOWN	LIMESTONE																								5	1	200	5		3
D118567		USGS		Geochemistry of rock samples from the National Geochemical Database: U.S. Geological Survey, Reston, VA.	U.S. Geological Survey	USGS		40.1333	-80.25	0.01	71	71	71	UNKNOWN	SEDIMENTARY	UNKNOWN	UNKNOWN	LIMESTONE																								1	1	700	3		1.5
D118568		USGS		Geochemistry of rock samples from the National Geochemical Database: U.S. Geological Survey, Reston, VA.	U.S. Geological Survey	USGS		40.1333	-80.25	0.01	71	71	71	UNKNOWN	SEDIMENTARY	UNKNOWN	UNKNOWN	LIMESTONE																								3	2	2000			3
D118569		USGS		Geochemistry of rock samples from the National Geochemical Database: U.S. Geological Survey, Reston, VA.	U.S. Geological Survey	USGS		40.1333	-80.25	0.01	71	71	71	UNKNOWN	SEDIMENTARY	UNKNOWN	UNKNOWN	LIMESTONE																								5	1.5	1500	10		7
D118570		USGS		Geochemistry of rock samples from the National Geochemical Database: U.S. Geological Survey, Reston, VA.	U.S. Geological Survey	USGS		40	-80.1333	0.01	71	71	71	UNKNOWN	SEDIMENTARY	UNKNOWN	UNKNOWN	LIMESTONE																								2	0.7	1000	3		7
D118571		USGS		Geochemistry of rock samples from the National Geochemical Database: U.S. Geological Survey, Reston, VA.	U.S. Geological Survey	USGS		40	-80.1333	0.01	71	71	71	UNKNOWN	SEDIMENTARY	UNKNOWN	UNKNOWN	LIMESTONE																								5	2	700	10		15
D118572		USGS		Geochemistry of rock samples from the National Geochemical Database: U.S. Geological Survey, Reston, VA.	U.S. Geological Survey	USGS		40	-80.1333	0.01	71	71	71	UNKNOWN	SEDIMENTARY	UNKNOWN	UNKNOWN	LIMESTONE																								3	1	700	7		5
D118573		USGS		Geochemistry of rock samples from the National Geochemical Database: U.S. Geological Survey, Reston, VA.	U.S. Geological Survey	USGS		40	-80.1333	0.01	71	71	71	UNKNOWN	SEDIMENTARY	UNKNOWN	UNKNOWN	LIMESTONE																								0.7	0.7	2000			1.5
D118574		USGS		Geochemistry of rock samples from the National Geochemical Database: U.S. Geological Survey, Reston, VA.	U.S. Geological Survey	USGS		40	-80	0.01	70	70	70	UNKNOWN	SEDIMENTARY	UNKNOWN	UNKNOWN	LIMESTONE																								3	3	1000	15		10
D118575		USGS		Geochemistry of rock samples from the National Geochemical Database: U.S. Geological Survey, Reston, VA.	U.S. Geological Survey	USGS		40.1333	-80	0.01	70	70	70	UNKNOWN	SEDIMENTARY	UNKNOWN	UNKNOWN	LIMESTONE																								3	1	500	3		5
D118576		USGS		Geochemistry of rock samples from the National Geochemical Database: U.S. Geological Survey, Reston, VA.	U.S. Geological Survey	USGS		40.1333	-79.8667	0.01	71	71	71	UNKNOWN	SEDIMENTARY	UNKNOWN	UNKNOWN	LIMESTONE																								2	1	500	7		5
D118577		USGS		Geochemistry of rock samples from the National Geochemical Database: U.S. Geological Survey, Reston, VA.	U.S. Geological Survey	USGS		40.1333	-79.8667	0.01	70	70	70	UNKNOWN	SEDIMENTARY	UNKNOWN	UNKNOWN	LIMESTONE																								0.15	0.5	700			2
D118578		USGS		Geochemistry of rock samples from the National Geochemical Database: U.S. Geological Survey, Reston, VA.	U.S. Geological Survey	USGS		40	-79.8667	0.01	70	70	70	UNKNOWN	SEDIMENTARY	UNKNOWN	UNKNOWN	LIMESTONE																								1	0.3	300	3		5
D118579		USGS		Geochemistry of rock samples from the National Geochemical Database: U.S. Geological Survey, Reston, VA.	U.S. Geological Survey	USGS		40	-79.8667	0.01	70	70	70	UNKNOWN	SEDIMENTARY	UNKNOWN	UNKNOWN	LIMESTONE																								2	1	700	10		10
D118580		USGS		Geochemistry of rock samples from the National Geochemical Database: U.S. Geological Survey, Reston, VA.	U.S. Geological Survey	USGS		40	-79.8667	0.01	71	70.5	70	UNKNOWN	SEDIMENTARY	UNKNOWN	UNKNOWN	LIMESTONE																								0.7	0.7	1000	3		3
D118581		USGS		Geochemistry of rock samples from the National Geochemical Database: U.S. Geological Survey, Reston, VA.	U.S. Geological Survey	USGS		40	-79.8667	0.01	70	70	70	UNKNOWN	SEDIMENTARY	UNKNOWN	UNKNOWN	LIMESTONE																								3	1	700	10		7
D118582		USGS		Geochemistry of rock samples from the National Geochemical Database: U.S. Geological Survey, Reston, VA.	U.S. Geological Survey	USGS		40	-79.8667	0.01	70	70	70	UNKNOWN	SEDIMENTARY	UNKNOWN	UNKNOWN	LIMESTONE																								1.5	2	1000	7		15
D119673		USGS		Geochemistry of rock samples from the National Geochemical Database: U.S. Geological Survey, Reston, VA.	U.S. Geological Survey	USGS		68.875	-162.75	0.01	59	59	59	AAS	SEDIMENTARY	UNKNOWN	UNKNOWN	LIMESTONE																														25	700
D119673		USGS		Geochemistry of rock samples from the National Geochemical Database: U.S. Geological Survey, Reston, VA.	U.S. Geological Survey	USGS		68.875	-162.75	0.01	59	59	59	COL	SEDIMENTARY	UNKNOWN	UNKNOWN	LIMESTONE
D119673		USGS		Geochemistry of rock samples from the National Geochemical Database: U.S. Geological Survey, Reston, VA.	U.S. Geological Survey	USGS		68.875	-162.75	0.01	59	59	59	ES	SEDIMENTARY	UNKNOWN	UNKNOWN	LIMESTONE																									1.5	200	150	7	200		1000
D119676		USGS		Geochemistry of rock samples from the National Geochemical Database: U.S. Geological Survey, Reston, VA.	U.S. Geological Survey	USGS		68.875	-162.75	0.01	59	59	59	AAS	SEDIMENTARY	UNKNOWN	UNKNOWN	LIMESTONE																														19	500
D119676		USGS		Geochemistry of rock samples from the National Geochemical Database: U.S. Geological Survey, Reston, VA.	U.S. Geological Survey	USGS		68.875	-162.75	0.01	59	59	59	COL	SEDIMENTARY	UNKNOWN	UNKNOWN	LIMESTONE
D119676		USGS		Geochemistry of rock samples from the National Geochemical Database: U.S. Geological Survey, Reston, VA.	U.S. Geological Survey	USGS		68.875	-162.75	0.01	59	59	59	ES	SEDIMENTARY	UNKNOWN	UNKNOWN	LIMESTONE																									3	500	150	20	100		700
D119679		USGS		Geochemistry of rock samples from the National Geochemical Database: U.S. Geological Survey, Reston, VA.	U.S. Geological Survey	USGS		68.875	-162.75	0.01	59	59	59	AAS	SEDIMENTARY	UNKNOWN	UNKNOWN	LIMESTONE																														30	1000
D119679		USGS		Geochemistry of rock samples from the National Geochemical Database: U.S. Geological Survey, Reston, VA.	U.S. Geological Survey	USGS		68.875	-162.75	0.01	59	59	59	COL	SEDIMENTARY	UNKNOWN	UNKNOWN	LIMESTONE
D119679		USGS		Geochemistry of rock samples from the National Geochemical Database: U.S. Geological Survey, Reston, VA.	U.S. Geological Survey	USGS		68.875	-162.75	0.01	59	59	59	ES	SEDIMENTARY	UNKNOWN	UNKNOWN	LIMESTONE																									1.5	150	100	7	150		2000
D119680		USGS		Geochemistry of rock samples from the National Geochemical Database: U.S. Geological Survey, Reston, VA.	U.S. Geological Survey	USGS		68.875	-162.75	0.01	59	59	59	AAS	SEDIMENTARY	UNKNOWN	UNKNOWN	LIMESTONE																														19	430
D119680		USGS		Geochemistry of rock samples from the National Geochemical Database: U.S. Geological Survey, Reston, VA.	U.S. Geological Survey	USGS		68.875	-162.75	0.01	59	59	59	COL	SEDIMENTARY	UNKNOWN	UNKNOWN	LIMESTONE
D119680		USGS		Geochemistry of rock samples from the National Geochemical Database: U.S. Geological Survey, Reston, VA.	U.S. Geological Survey	USGS		68.875	-162.75	0.01	59	59	59	ES	SEDIMENTARY	UNKNOWN	UNKNOWN	LIMESTONE																									1	150	70		100		700
D119681		USGS		Geochemistry of rock samples from the National Geochemical Database: U.S. Geological Survey, Reston, VA.	U.S. Geological Survey	USGS		68.875	-162.75	0.01	59	59	59	AAS	SEDIMENTARY	UNKNOWN	UNKNOWN	LIMESTONE																														40	1800
D119681		USGS		Geochemistry of rock samples from the National Geochemical Database: U.S. Geological Survey, Reston, VA.	U.S. Geological Survey	USGS		68.875	-162.75	0.01	59	59	59	COL	SEDIMENTARY	UNKNOWN	UNKNOWN	LIMESTONE
D119681		USGS		Geochemistry of rock samples from the National Geochemical Database: U.S. Geological Survey, Reston, VA.	U.S. Geological Survey	USGS		68.875	-162.75	0.01	59	59	59	ES	SEDIMENTARY	UNKNOWN	UNKNOWN	LIMESTONE																									2	500	150	30	150		2000
D119682		USGS		Geochemistry of rock samples from the National Geochemical Database: U.S. Geological Survey, Reston, VA.	U.S. Geological Survey	USGS		68.875	-162.75	0.01	59	59	59	AAS	SEDIMENTARY	UNKNOWN	UNKNOWN	LIMESTONE																														38	1700
D119682		USGS		Geochemistry of rock samples from the National Geochemical Database: U.S. Geological Survey, Reston, VA.	U.S. Geological Survey	USGS		68.875	-162.75	0.01	59	59	59	COL	SEDIMENTARY	UNKNOWN	UNKNOWN	LIMESTONE
D119682		USGS		Geochemistry of rock samples from the National Geochemical Database: U.S. Geological Survey, Reston, VA.	U.S. Geological Survey	USGS		68.875	-162.75	0.01	59	59	59	ES	SEDIMENTARY	UNKNOWN	UNKNOWN	LIMESTONE																									1.5	300	100	10	150		1000
D119683		USGS		Geochemistry of rock samples from the National Geochemical Database: U.S. Geological Survey, Reston, VA.	U.S. Geological Survey	USGS		68.875	-162.75	0.01	59	59	59	AAS	SEDIMENTARY	UNKNOWN	UNKNOWN	LIMESTONE																														18	450
D119683		USGS		Geochemistry of rock samples from the National Geochemical Database: U.S. Geological Survey, Reston, VA.	U.S. Geological Survey	USGS		68.875	-162.75	0.01	59	59	59	COL	SEDIMENTARY	UNKNOWN	UNKNOWN	LIMESTONE
D119683		USGS		Geochemistry of rock samples from the National Geochemical Database: U.S. Geological Survey, Reston, VA.	U.S. Geological Survey	USGS		68.875	-162.75	0.01	59	59	59	ES	SEDIMENTARY	UNKNOWN	UNKNOWN	LIMESTONE																									1.5	500	70		100		1000
D119685		USGS		Geochemistry of rock samples from the National Geochemical Database: U.S. Geological Survey, Reston, VA.	U.S. Geological Survey	USGS		68.875	-162.75	0.01	59	59	59	AAS	SEDIMENTARY	UNKNOWN	UNKNOWN	LIMESTONE																														10	270
D119685		USGS		Geochemistry of rock samples from the National Geochemical Database: U.S. Geological Survey, Reston, VA.	U.S. Geological Survey	USGS		68.875	-162.75	0.01	59	59	59	COL	SEDIMENTARY	UNKNOWN	UNKNOWN	LIMESTONE
D119685		USGS		Geochemistry of rock samples from the National Geochemical Database: U.S. Geological Survey, Reston, VA.	U.S. Geological Survey	USGS		68.875	-162.75	0.01	59	59	59	ES	SEDIMENTARY	UNKNOWN	UNKNOWN	LIMESTONE																									1.5	700	50		100
D119686		USGS		Geochemistry of rock samples from the National Geochemical Database: U.S. Geological Survey, Reston, VA.	U.S. Geological Survey	USGS		68.875	-162.75	0.01	59	59	59	AAS	SEDIMENTARY	UNKNOWN	UNKNOWN	LIMESTONE																														7	210
D119686		USGS		Geochemistry of rock samples from the National Geochemical Database: U.S. Geological Survey, Reston, VA.	U.S. Geological Survey	USGS		68.875	-162.75	0.01	59	59	59	COL	SEDIMENTARY	UNKNOWN	UNKNOWN	LIMESTONE
D119686		USGS		Geochemistry of rock samples from the National Geochemical Database: U.S. Geological Survey, Reston, VA.	U.S. Geological Survey	USGS		68.875	-162.75	0.01	59	59	59	ES	SEDIMENTARY	UNKNOWN	UNKNOWN	LIMESTONE																									1.5	500	50	7	100
D119687		USGS		Geochemistry of rock samples from the National Geochemical Database: U.S. Geological Survey, Reston, VA.	U.S. Geological Survey	USGS		68.875	-162.75	0.01	59	59	59	AAS	SEDIMENTARY	UNKNOWN	UNKNOWN	LIMESTONE																														6	200
D119687		USGS		Geochemistry of rock samples from the National Geochemical Database: U.S. Geological Survey, Reston, VA.	U.S. Geological Survey	USGS		68.875	-162.75	0.01	59	59	59	COL	SEDIMENTARY	UNKNOWN	UNKNOWN	LIMESTONE
D119687		USGS		Geochemistry of rock samples from the National Geochemical Database: U.S. Geological Survey, Reston, VA.	U.S. Geological Survey	USGS		68.875	-162.75	0.01	59	59	59	ES	SEDIMENTARY	UNKNOWN	UNKNOWN	LIMESTONE																									1.5	300	70	10	150
D119688		USGS		Geochemistry of rock samples from the National Geochemical Database: U.S. Geological Survey, Reston, VA.	U.S. Geological Survey	USGS		68.875	-162.75	0.01	59	59	59	AAS	SEDIMENTARY	UNKNOWN	UNKNOWN	LIMESTONE																														6	180
D119688		USGS		Geochemistry of rock samples from the National Geochemical Database: U.S. Geological Survey, Reston, VA.	U.S. Geological Survey	USGS		68.875	-162.75	0.01	59	59	59	COL	SEDIMENTARY	UNKNOWN	UNKNOWN	LIMESTONE
D119688		USGS		Geochemistry of rock samples from the National Geochemical Database: U.S. Geological Survey, Reston, VA.	U.S. Geological Survey	USGS		68.875	-162.75	0.01	59	59	59	ES	SEDIMENTARY	UNKNOWN	UNKNOWN	LIMESTONE																									2	500	50	10	100
D119689		USGS		Geochemistry of rock samples from the National Geochemical Database: U.S. Geological Survey, Reston, VA.	U.S. Geological Survey	USGS		68.875	-162.75	0.01	59	59	59	AAS	SEDIMENTARY	UNKNOWN	UNKNOWN	LIMESTONE																														4	100
D119689		USGS		Geochemistry of rock samples from the National Geochemical Database: U.S. Geological Survey, Reston, VA.	U.S. Geological Survey	USGS		68.875	-162.75	0.01	59	59	59	COL	SEDIMENTARY	UNKNOWN	UNKNOWN	LIMESTONE
D119689		USGS		Geochemistry of rock samples from the National Geochemical Database: U.S. Geological Survey, Reston, VA.	U.S. Geological Survey	USGS		68.875	-162.75	0.01	59	59	59	ES	SEDIMENTARY	UNKNOWN	UNKNOWN	LIMESTONE																									1.5	300	50	10	100
D119691		USGS		Geochemistry of rock samples from the National Geochemical Database: U.S. Geological Survey, Reston, VA.	U.S. Geological Survey	USGS		68.875	-162.75	0.01	59	59	59	AAS	SEDIMENTARY	UNKNOWN	UNKNOWN	LIMESTONE																														4	80
D119691		USGS		Geochemistry of rock samples from the National Geochemical Database: U.S. Geological Survey, Reston, VA.	U.S. Geological Survey	USGS		68.875	-162.75	0.01	59	59	59	COL	SEDIMENTARY	UNKNOWN	UNKNOWN	LIMESTONE
D119691		USGS		Geochemistry of rock samples from the National Geochemical Database: U.S. Geological Survey, Reston, VA.	U.S. Geological Survey	USGS		68.875	-162.75	0.01	59	59	59	ES	SEDIMENTARY	UNKNOWN	UNKNOWN	LIMESTONE																									1.5	200	50	10	150
D119702		USGS		Geochemistry of rock samples from the National Geochemical Database: U.S. Geological Survey, Reston, VA.	U.S. Geological Survey	USGS		65.875	-162.75	0.01	59	59	59	AAS	SEDIMENTARY	UNKNOWN	UNKNOWN	LIMESTONE																														4	100
D119702		USGS		Geochemistry of rock samples from the National Geochemical Database: U.S. Geological Survey, Reston, VA.	U.S. Geological Survey	USGS		65.875	-162.75	0.01	59	59	59	COL	SEDIMENTARY	UNKNOWN	UNKNOWN	LIMESTONE
D119702		USGS		Geochemistry of rock samples from the National Geochemical Database: U.S. Geological Survey, Reston, VA.	U.S. Geological Survey	USGS		65.875	-162.75	0.01	59	59	59	ES	SEDIMENTARY	UNKNOWN	UNKNOWN	LIMESTONE																									3	700	70	7	100
D119703		USGS		Geochemistry of rock samples from the National Geochemical Database: U.S. Geological Survey, Reston, VA.	U.S. Geological Survey	USGS		65.875	-162.75	0.01	59	59	59	AAS	SEDIMENTARY	UNKNOWN	UNKNOWN	LIMESTONE																														3	60
D119703		USGS		Geochemistry of rock samples from the National Geochemical Database: U.S. Geological Survey, Reston, VA.	U.S. Geological Survey	USGS		65.875	-162.75	0.01	59	59	59	COL	SEDIMENTARY	UNKNOWN	UNKNOWN	LIMESTONE
D119703		USGS		Geochemistry of rock samples from the National Geochemical Database: U.S. Geological Survey, Reston, VA.	U.S. Geological Survey	USGS		65.875	-162.75	0.01	59	59	59	ES	SEDIMENTARY	UNKNOWN	UNKNOWN	LIMESTONE																									1.5	300	50	7	100
D119705		USGS		Geochemistry of rock samples from the National Geochemical Database: U.S. Geological Survey, Reston, VA.	U.S. Geological Survey	USGS		65.875	-162.75	0.01	59	59	59	AAS	SEDIMENTARY	UNKNOWN	UNKNOWN	LIMESTONE																															90
D119705		USGS		Geochemistry of rock samples from the National Geochemical Database: U.S. Geological Survey, Reston, VA.	U.S. Geological Survey	USGS		65.875	-162.75	0.01	59	59	59	COL	SEDIMENTARY	UNKNOWN	UNKNOWN	LIMESTONE
D119705		USGS		Geochemistry of rock samples from the National Geochemical Database: U.S. Geological Survey, Reston, VA.	U.S. Geological Survey	USGS		65.875	-162.75	0.01	59	59	59	ES	SEDIMENTARY	UNKNOWN	UNKNOWN	LIMESTONE																									1.5	150	50	15	100
D119706		USGS		Geochemistry of rock samples from the National Geochemical Database: U.S. Geological Survey, Reston, VA.	U.S. Geological Survey	USGS		65.875	-162.75	0.01	59	59	59	AAS	SEDIMENTARY	UNKNOWN	UNKNOWN	LIMESTONE
D119706		USGS		Geochemistry of rock samples from the National Geochemical Database: U.S. Geological Survey, Reston, VA.	U.S. Geological Survey	USGS		65.875	-162.75	0.01	59	59	59	COL	SEDIMENTARY	UNKNOWN	UNKNOWN	LIMESTONE
D119706		USGS		Geochemistry of rock samples from the National Geochemical Database: U.S. Geological Survey, Reston, VA.	U.S. Geological Survey	USGS		65.875	-162.75	0.01	59	59	59	ES	SEDIMENTARY	UNKNOWN	UNKNOWN	LIMESTONE																									2	500	50		70
D119707		USGS		Geochemistry of rock samples from the National Geochemical Database: U.S. Geological Survey, Reston, VA.	U.S. Geological Survey	USGS		68.125	-163.875	0.01				ES	SEDIMENTARY	UNKNOWN	UNKNOWN	LIMESTONE																									7	200	70	30	150
D119800		USGS		Geochemistry of rock samples from the National Geochemical Database: U.S. Geological Survey, Reston, VA.	U.S. Geological Survey	USGS		68.5	-156.625	0.01				AAS	SEDIMENTARY	UNKNOWN	UNKNOWN	LIMESTONE																														10	380
D119800		USGS		Geochemistry of rock samples from the National Geochemical Database: U.S. Geological Survey, Reston, VA.	U.S. Geological Survey	USGS		68.5	-156.625	0.01				COL	SEDIMENTARY	UNKNOWN	UNKNOWN	LIMESTONE
D119800		USGS		Geochemistry of rock samples from the National Geochemical Database: U.S. Geological Survey, Reston, VA.	U.S. Geological Survey	USGS		68.5	-156.625	0.01				ES	SEDIMENTARY	UNKNOWN	UNKNOWN	LIMESTONE																								7	1	7000	50	15	30
D120078		USGS		Geochemistry of rock samples from the National Geochemical Database: U.S. Geological Survey, Reston, VA.	U.S. Geological Survey	USGS		65.25	-167	0.01	65	65	65	ES	SEDIMENTARY	UNKNOWN	UNKNOWN	LIMESTONE																									3	700	10		100		700
D120078		USGS		Geochemistry of rock samples from the National Geochemical Database: U.S. Geological Survey, Reston, VA.	U.S. Geological Survey	USGS		65.25	-167	0.01	65	65	65	ISE	SEDIMENTARY	UNKNOWN	UNKNOWN	LIMESTONE
D120079		USGS		Geochemistry of rock samples from the National Geochemical Database: U.S. Geological Survey, Reston, VA.	U.S. Geological Survey	USGS		65.25	-167	0.01	65	65	65	ES	SEDIMENTARY	UNKNOWN	UNKNOWN	LIMESTONE																									2	2000	15		300		2000
D120079		USGS		Geochemistry of rock samples from the National Geochemical Database: U.S. Geological Survey, Reston, VA.	U.S. Geological Survey	USGS		65.25	-167	0.01	65	65	65	ISE	SEDIMENTARY	UNKNOWN	UNKNOWN	LIMESTONE
D120976		USGS		Geochemistry of rock samples from the National Geochemical Database: U.S. Geological Survey, Reston, VA.	U.S. Geological Survey	USGS		37.25	-87.3667	0.01	70	70	70	UNKNOWN	SEDIMENTARY	UNKNOWN	UNKNOWN	LIMESTONE		4.3	0.04	1.2		0.32		0.52		0.13	6.3	43.7		0.21	0.23	0.03									0.7	1000	15		10
D120977		USGS		Geochemistry of rock samples from the National Geochemical Database: U.S. Geological Survey, Reston, VA.	U.S. Geological Survey	USGS		37.75	-86.8667	0.01	70	70	70	UNKNOWN	SEDIMENTARY	UNKNOWN	UNKNOWN	LIMESTONE		5.9	0.04	1.2		0.66		1.4		0.11	2.5	46		0.22	0.28	0.05									2	1000	15		10
D120978		USGS		Geochemistry of rock samples from the National Geochemical Database: U.S. Geological Survey, Reston, VA.	U.S. Geological Survey	USGS		38.25	-82.8667	0.01	68	68	68	UNKNOWN	SEDIMENTARY	UNKNOWN	UNKNOWN	LIMESTONE		3.5	0.04	0.56				0.28		0.09	0.44	52.6			0.18										0.3	300	10		10
D120979		USGS		Geochemistry of rock samples from the National Geochemical Database: U.S. Geological Survey, Reston, VA.	U.S. Geological Survey	USGS		37.75	-84.3667	0.01	69	69	69	UNKNOWN	SEDIMENTARY	UNKNOWN	UNKNOWN	LIMESTONE		3.9	0.06	0.85		0.41		0.12		0.13	0.76	51.6		0.3	0.4	0.18									0.5	700			5
D120980		USGS		Geochemistry of rock samples from the National Geochemical Database: U.S. Geological Survey, Reston, VA.	U.S. Geological Survey	USGS		38.3667	-82.6333	0.01	70	70	70	UNKNOWN	SEDIMENTARY	UNKNOWN	UNKNOWN	LIMESTONE		9	0.07	1.5		0.57		1.3		0.18	0.7	46.6		0.23	0.25	0.19									1.5	1000	20	10	10
D120981		USGS		Geochemistry of rock samples from the National Geochemical Database: U.S. Geological Survey, Reston, VA.	U.S. Geological Survey	USGS		37.6333	-85.5	0.01	69	69	69	UNKNOWN	SEDIMENTARY	UNKNOWN	UNKNOWN	LIMESTONE		3.9	0.06	0.85		1.5		3.1		0.13	15.5	30.2		0.18	0.31										5	1000	10	7	10		3000
D120982		USGS		Geochemistry of rock samples from the National Geochemical Database: U.S. Geological Survey, Reston, VA.	U.S. Geological Survey	USGS		38.6333	-83.5	0.01	69	69	69	UNKNOWN	SEDIMENTARY	UNKNOWN	UNKNOWN	LIMESTONE		2	0.06	0.46		0.39		0.36		0.04	2	51			0.19	0.08									0.5	700			7
D120983		USGS		Geochemistry of rock samples from the National Geochemical Database: U.S. Geological Survey, Reston, VA.	U.S. Geological Survey	USGS		38	-84.6333	0.01	69	69	69	UNKNOWN	SEDIMENTARY	UNKNOWN	UNKNOWN	LIMESTONE		2.4	0.07	0.85		0.36		0.48		0.09	1.3	52		0.18	0.28	0.11									1	500			7
D120984		USGS		Geochemistry of rock samples from the National Geochemical Database: U.S. Geological Survey, Reston, VA.	U.S. Geological Survey	USGS		38.25	-82.8667	0.01	68	68	68	UNKNOWN	SEDIMENTARY	UNKNOWN	UNKNOWN	LIMESTONE		5.4	0.06	0.46				0.12		0.05	0.41	51.3		0.11	0.2	0.02									0.2	200			10
D120985		USGS		Geochemistry of rock samples from the National Geochemical Database: U.S. Geological Survey, Reston, VA.	U.S. Geological Survey	USGS		38	-84.6333	0.01	69	69	69	UNKNOWN	SEDIMENTARY	UNKNOWN	UNKNOWN	LIMESTONE		2	0.06	0.56		0.26		0.48		0.09	4.4	48.3		0.26	0.27	0.06									1	500			7
D120986		USGS		Geochemistry of rock samples from the National Geochemical Database: U.S. Geological Survey, Reston, VA.	U.S. Geological Survey	USGS		37.75	-86.8667	0.01	70	70	70	UNKNOWN	SEDIMENTARY	UNKNOWN	UNKNOWN	LIMESTONE		5.3	0.07	1.4		0.95		0.32		0.14	1.1	48.9		0.57	0.35	0.13									1	700	20		7
D120987		USGS		Geochemistry of rock samples from the National Geochemical Database: U.S. Geological Survey, Reston, VA.	U.S. Geological Survey	USGS		37.75	-84.3667	0.01	69	69	69	UNKNOWN	SEDIMENTARY	UNKNOWN	UNKNOWN	LIMESTONE		3.1	0.07	0.65		0.36		0.16		0.13	1.2	52.1		0.26	0.37	0.19									0.5	700			2
D120988		USGS		Geochemistry of rock samples from the National Geochemical Database: U.S. Geological Survey, Reston, VA.	U.S. Geological Survey	USGS		37.6333	-85.5	0.01	69	69	69	UNKNOWN	SEDIMENTARY	UNKNOWN	UNKNOWN	LIMESTONE		6.4	0.09	1.2		0.32		0.32		0.13	3	46.4		0.26	0.46	0.29									0.7	500			5
D120989		USGS		Geochemistry of rock samples from the National Geochemical Database: U.S. Geological Survey, Reston, VA.	U.S. Geological Survey	USGS		38.25	-82.8667	0.01	68	68	68	UNKNOWN	SEDIMENTARY	UNKNOWN	UNKNOWN	LIMESTONE		2	0.06	0.27				0.32		0.16	0.22	54		0.15	0.15	0.11									0.5	700
D120990		USGS		Geochemistry of rock samples from the National Geochemical Database: U.S. Geological Survey, Reston, VA.	U.S. Geological Survey	USGS		38.3667	-83.1333	0.01	68	68	68	UNKNOWN	SEDIMENTARY	UNKNOWN	UNKNOWN	LIMESTONE		59	0.57	4.7		1.4		0.52		0.11	0.38	17.4		0.42	1.4	0.02									2	700	30	10	15
D120991		USGS		Geochemistry of rock samples from the National Geochemical Database: U.S. Geological Survey, Reston, VA.	U.S. Geological Survey	USGS		37.25	-87.3667	0.01	70	70	70	UNKNOWN	SEDIMENTARY	UNKNOWN	UNKNOWN	LIMESTONE		4	0.06	0.85		2.2		0.28		0.09	0.61	49.8		0.21	0.16	0.03									2	700			5
D120992		USGS		Geochemistry of rock samples from the National Geochemical Database: U.S. Geological Survey, Reston, VA.	U.S. Geological Survey	USGS		38	-84.6333	0.01	69	69	69	UNKNOWN	SEDIMENTARY	UNKNOWN	UNKNOWN	LIMESTONE		2.4	0.06	0.75		0.57		0.48		0.14	2.5	48.8		0.22	0.26	0.46									1	700
D120993		USGS		Geochemistry of rock samples from the National Geochemical Database: U.S. Geological Survey, Reston, VA.	U.S. Geological Survey	USGS		36.8667	-84.5	0.01	68	68	68	UNKNOWN	SEDIMENTARY	UNKNOWN	UNKNOWN	LIMESTONE		35.7	0.06	0.75				0.36		0.09	0.73	34.2		0.2	0.26	0.02									0.5	500			2
D120994		USGS		Geochemistry of rock samples from the National Geochemical Database: U.S. Geological Survey, Reston, VA.	U.S. Geological Survey	USGS		38.6333	-83.5	0.01	69	69	69	UNKNOWN	SEDIMENTARY	UNKNOWN	UNKNOWN	LIMESTONE		3.2	0.07	1.2		0.4		0.64		0.18	1.9	50.5		0.22	0.39	0.05									1	1000			5
D120995		USGS		Geochemistry of rock samples from the National Geochemical Database: U.S. Geological Survey, Reston, VA.	U.S. Geological Survey	USGS		37.75	-86.8667	0.01	70	70	70	UNKNOWN	SEDIMENTARY	UNKNOWN	UNKNOWN	LIMESTONE		11.2	0.07	1.5		0.61		0.72		0.18	0.8	46.5		0.39	0.38	0.1									1.5	1000	30	10	10
D120997		USGS		Geochemistry of rock samples from the National Geochemical Database: U.S. Geological Survey, Reston, VA.	U.S. Geological Survey	USGS		37.25	-87.3667	0.01	70	70	70	UNKNOWN	SEDIMENTARY	UNKNOWN	UNKNOWN	LIMESTONE		2.7	0.09	0.66		2.1		0.24		0.2	0.79	51.5		0.27	0.15	0.02									2	1000	10		5
D120998		USGS		Geochemistry of rock samples from the National Geochemical Database: U.S. Geological Survey, Reston, VA.	U.S. Geological Survey	USGS		38.3667	-82.8667	0.01	68	68	68	UNKNOWN	SEDIMENTARY	UNKNOWN	UNKNOWN	LIMESTONE		0.58	0.04	0.37		2.2		0.24		0.05	0.21	53.3		0.15		0.1									0.5	300			2
D121000		USGS		Geochemistry of rock samples from the National Geochemical Database: U.S. Geological Survey, Reston, VA.	U.S. Geological Survey	USGS		36.75	-88.1333	0.01	68	68	68	UNKNOWN	SEDIMENTARY	UNKNOWN	UNKNOWN	LIMESTONE		24.3	0.26	2.5		0.36		0.24			1	39		0.22	0.47	0.08									0.7	100	10		5
D121002		USGS		Geochemistry of rock samples from the National Geochemical Database: U.S. Geological Survey, Reston, VA.	U.S. Geological Survey	USGS		36.75	-88.1333	0.01	68	68	68	UNKNOWN	SEDIMENTARY	UNKNOWN	UNKNOWN	LIMESTONE		25.7	0.07	0.75		0.28		0.24			1.2	38.5		0.12	0.26	0.08									0.5	100			5
D121003		USGS		Geochemistry of rock samples from the National Geochemical Database: U.S. Geological Survey, Reston, VA.	U.S. Geological Survey	USGS		36.8667	-84.5	0.01	68	68	68	UNKNOWN	SEDIMENTARY	UNKNOWN	UNKNOWN	LIMESTONE		34.3	0.07	0.85				0.52		0.07	0.72	35.2		0.14	0.18	0.02									0.5	500			2
D121004		USGS		Geochemistry of rock samples from the National Geochemical Database: U.S. Geological Survey, Reston, VA.	U.S. Geological Survey	USGS		38.25	-82.8667	0.01	68	68	68	UNKNOWN	SEDIMENTARY	UNKNOWN	UNKNOWN	LIMESTONE		4.4	0.04	0.66				0.32		0.04	0.55	52.5		0.11	0.32	0.02									0.2	200			7
D121005		USGS		Geochemistry of rock samples from the National Geochemical Database: U.S. Geological Survey, Reston, VA.	U.S. Geological Survey	USGS		38.6333	-83.5	0.01	69	69	69	UNKNOWN	SEDIMENTARY	UNKNOWN	UNKNOWN	LIMESTONE		7	1.2	1.7		0.26		0.76		0.02	1.8	47.4		0.15	0.7	0.21									1	1500	10		7
[truncated: 7,633 more rows]
[truncated: 105 more columns]

## Sheet: References
References
AUTHOR	YEAR	TITLE	JOURNAL
[truncated: 130 more rows]
