# Supplementary material for: Basic chemical compositions combination rules and quantitative criterion of red beds
Source: Copernicus journal article supplement (doi:10.5194/egusphere-2023-2590), 2024-01-29
Supplement: Supplementary file 8 [file Supplementary Table 16-marl_EarthChem.xlsx]

## Sheet: Data
EarthChem Download: Wednesday, May. 10, 2023 8:11:15 am
Search Criteria:
Material	sedimentary
Rock Name	marlstone,marl
SAMPLE ID	IGSN	SOURCE	DOI	TITLE	JOURNAL	AUTHOR	CRUISEID	LATITUDE	LONGITUDE	LOC PREC	MIN AGE	AGE	MAX AGE	METHOD	MATERIAL	TYPE	COMPOSITION	ROCK NAME	MINERAL	SIO2	TIO2	AL2O3	FE2O3	FE2O3T	FEO	FEOT	MNO	MGO	CAO	NA2O	K2O	P2O5	LOI	SI	FE	MN	NI	CO	CU	ZN	AG	AL	CA	MG	SR87_SR86	RB87_SR86	ND143_ND144	SM147_ND144	PB206_PB204
EN20-18		GEOROC	10.1016/S0009-2541(97)00150-2	THE CHEMICAL COMPOSITION OF SUBDUCTING SEDIMENT AND ITS CONSEQUENCES FOR THE CRUST AND MANTLE	CHEM. GEOL.	PLANK, T. A.; LANGMUIR, C. H.		17.45	-60.03	0.01				DCPAES	SEDIMENTARY			MARL		21.94	0.31	7.2				2.86	0.148	1.74	31.12	2.1	1.18	0.088	31.31				31.6		43.5	42
FIC		GEOROC	10.1016/S0024-4937(01)00054-8	PETROLOGY OF MELILITE-BEARING ROCKS FROM THE MONTEFIASCONE VOLCANIC COMPLEX (ROMAN MAGMATIC PROVINCE): NEW INSIGHTS INTO THE ULTRAPOTASSIC VOLCANISM OF CENTRAL ITALY	LITHOS	DI BATTISTINI, G.; SAKAMOTO, M.; MONTANINI, A.; VENTURELLI, G.; TONARINI, S.		42.6	11.93	0.01				ICPMS	SEDIMENTARY			MARL		9.38	0.1	2.38		1.28			0.09	0.79	47.8	0.22	0.17						21	7.3
FIC		GEOROC	10.1016/S0024-4937(01)00054-8	PETROLOGY OF MELILITE-BEARING ROCKS FROM THE MONTEFIASCONE VOLCANIC COMPLEX (ROMAN MAGMATIC PROVINCE): NEW INSIGHTS INTO THE ULTRAPOTASSIC VOLCANISM OF CENTRAL ITALY	LITHOS	DI BATTISTINI, G.; SAKAMOTO, M.; MONTANINI, A.; VENTURELLI, G.; TONARINI, S.		42.6	11.93	0.01				IGN	SEDIMENTARY			MARL															37.45
FIC		GEOROC	10.1016/S0024-4937(01)00054-8	PETROLOGY OF MELILITE-BEARING ROCKS FROM THE MONTEFIASCONE VOLCANIC COMPLEX (ROMAN MAGMATIC PROVINCE): NEW INSIGHTS INTO THE ULTRAPOTASSIC VOLCANISM OF CENTRAL ITALY	LITHOS	DI BATTISTINI, G.; SAKAMOTO, M.; MONTANINI, A.; VENTURELLI, G.; TONARINI, S.		42.6	11.93	0.01				TIMS	SEDIMENTARY			MARL																											0.70772		0.51222
ST 135/26		GEOROC		PETROLOGY, MINERALOGY AND GEOCHEMISTRY OF A MAFIC DIKE FROM MONTE CASTELLO, ELBA ISLAND, ITALY	OFIOLITI	CONTICELLI, S.; BORTOLOTTI, V.; PRINCIPI, G.; LAURENZI, M. A.; D^ANTONIO, M.; VAGGELLI, G.		42.82	10.38	0.01				XRF	SEDIMENTARY			MARLSTONE		10.8	0	0.86	0.53				0.31		48.3		0.09	0.02					0	0	8	23
ST 135/26		GEOROC		PETROLOGY, MINERALOGY AND GEOCHEMISTRY OF A MAFIC DIKE FROM MONTE CASTELLO, ELBA ISLAND, ITALY	OFIOLITI	CONTICELLI, S.; BORTOLOTTI, V.; PRINCIPI, G.; LAURENZI, M. A.; D^ANTONIO, M.; VAGGELLI, G.		42.82	10.38	0.01				AAS	SEDIMENTARY			MARLSTONE										0.52		0.01
ST 135/26		GEOROC		PETROLOGY, MINERALOGY AND GEOCHEMISTRY OF A MAFIC DIKE FROM MONTE CASTELLO, ELBA ISLAND, ITALY	OFIOLITI	CONTICELLI, S.; BORTOLOTTI, V.; PRINCIPI, G.; LAURENZI, M. A.; D^ANTONIO, M.; VAGGELLI, G.		42.82	10.38	0.01				TIT	SEDIMENTARY			MARLSTONE							0.48
ST 135/26		GEOROC		PETROLOGY, MINERALOGY AND GEOCHEMISTRY OF A MAFIC DIKE FROM MONTE CASTELLO, ELBA ISLAND, ITALY	OFIOLITI	CONTICELLI, S.; BORTOLOTTI, V.; PRINCIPI, G.; LAURENZI, M. A.; D^ANTONIO, M.; VAGGELLI, G.		42.82	10.38	0.01				IGN	SEDIMENTARY			MARLSTONE															38.1
ST 135/26		GEOROC		PETROLOGY, MINERALOGY AND GEOCHEMISTRY OF A MAFIC DIKE FROM MONTE CASTELLO, ELBA ISLAND, ITALY	OFIOLITI	CONTICELLI, S.; BORTOLOTTI, V.; PRINCIPI, G.; LAURENZI, M. A.; D^ANTONIO, M.; VAGGELLI, G.		42.82	10.38	0.01				TIMS	SEDIMENTARY			MARLSTONE																											0.707669
ST 135/26		GEOROC	10.1016/j.lithos.2008.07.016	TRACE ELEMENTS AND SR-ND-PB ISOTOPES OF K-RICH, SHOSHONITIC, AND CALC-ALKALINE MAGMATISM OF THE WESTERN MEDITERRANEAN REGION: GENESIS OF ULTRAPOTASSIC TO CALC-ALKALINE MAGMATIC ASSOCIATIONS IN A POST-COLLISIONAL GEODYNAMIC SETTING	LITHOS	CONTICELLI, S.; GUARNIERI, L.; FARINELLI, A.; MATTEI, M.; AVANZINELLI, R.; BIANCHINI, G.; BOARI, E.; TOMMASINI, S.; TIEPOLO, M.; PRELEVIC, D.; VENTURELLI, G.		42.82	10.38	0.01				ICPMS_LA	SEDIMENTARY			MARLSTONE																			0	0	8	23
ST 135/26		GEOROC	10.1016/j.lithos.2008.07.016	TRACE ELEMENTS AND SR-ND-PB ISOTOPES OF K-RICH, SHOSHONITIC, AND CALC-ALKALINE MAGMATISM OF THE WESTERN MEDITERRANEAN REGION: GENESIS OF ULTRAPOTASSIC TO CALC-ALKALINE MAGMATIC ASSOCIATIONS IN A POST-COLLISIONAL GEODYNAMIC SETTING	LITHOS	CONTICELLI, S.; GUARNIERI, L.; FARINELLI, A.; MATTEI, M.; AVANZINELLI, R.; BIANCHINI, G.; BOARI, E.; TOMMASINI, S.; TIEPOLO, M.; PRELEVIC, D.; VENTURELLI, G.		42.82	10.38	0.01				TIMS	SEDIMENTARY			MARLSTONE																											0.707669
185-1149B16R1 93-98		GEOROC	10.1016/j.epsl.2005.11.063	STABLE ISOTOPE COMPOSITIONS OF SERPENTINITE SEAMOUNTS IN THE MARIANA FOREARC: SERPENTINIZATION PROCESSES, FLUID SOURCES AND SULFUR METASOMATISM	EARTH PLANET. SCI. LETT.	ALT, J. C.; SHANKS, W. C. III		31.3422	143.351	0.0001	100	100	100	MS	SEDIMENTARY			MARL
185-1149B29R1 28-35		GEOROC	10.1029/2002GC000421	SR-ND-PB COMPOSITION OF MESOZOIC PACIFIC OCEANIC CRUST (SITE 1149 AND 801, ODP LEG 185): IMPLICATIONS FOR ALTERATION OF OCEAN CRUST AND THE INPUT INTO THE IZU-BONIN-MARIANA SUBDUCTION SYSTEM	GEOCHEMISTRY GEOPHYSICS GEOSYSTEMS	HAUFF, F.; HOERNLE, K. A.; SCHMIDT, A.		31.3422	143.351	0.0001	120	120	120	TIMS	SEDIMENTARY			MARL																											0.708074	0.22	0.512305	0.112	18.379
Y51		GEOROC		PETROLOGY AND MINERALOGY OF WOLLASTONITE- AND MELILITE-BEARING PARALAVAS FROM THE CENTRAL APENNINES, ITALY	AM. MINERAL.	MELLUSO, L.; CONTICELLI, S.; D^ANTONIO, M.; MIRCO, N. P.; SACCANI, E.		43.5	12	0.1				XRF	SEDIMENTARY			MARL		32	0.34	8.71		3.11			0.24		26.9								118			118
Y51		GEOROC		PETROLOGY AND MINERALOGY OF WOLLASTONITE- AND MELILITE-BEARING PARALAVAS FROM THE CENTRAL APENNINES, ITALY	AM. MINERAL.	MELLUSO, L.; CONTICELLI, S.; D^ANTONIO, M.; MIRCO, N. P.; SACCANI, E.		43.5	12	0.1				AAS	SEDIMENTARY			MARL										1.59		0.12	1.25
Y51		GEOROC		PETROLOGY AND MINERALOGY OF WOLLASTONITE- AND MELILITE-BEARING PARALAVAS FROM THE CENTRAL APENNINES, ITALY	AM. MINERAL.	MELLUSO, L.; CONTICELLI, S.; D^ANTONIO, M.; MIRCO, N. P.; SACCANI, E.		43.5	12	0.1				IGN	SEDIMENTARY			MARL															25.7
Y51		GEOROC		PETROLOGY AND MINERALOGY OF WOLLASTONITE- AND MELILITE-BEARING PARALAVAS FROM THE CENTRAL APENNINES, ITALY	AM. MINERAL.	MELLUSO, L.; CONTICELLI, S.; D^ANTONIO, M.; MIRCO, N. P.; SACCANI, E.		43.5	12	0.1				COL	SEDIMENTARY			MARL														0.07
Y51		GEOROC		PETROLOGY AND MINERALOGY OF WOLLASTONITE- AND MELILITE-BEARING PARALAVAS FROM THE CENTRAL APENNINES, ITALY	AM. MINERAL.	MELLUSO, L.; CONTICELLI, S.; D^ANTONIO, M.; MIRCO, N. P.; SACCANI, E.		43.5	12	0.1				INAA	SEDIMENTARY			MARL																				22
I24		GEOROC		PETROLOGY AND MINERALOGY OF WOLLASTONITE- AND MELILITE-BEARING PARALAVAS FROM THE CENTRAL APENNINES, ITALY	AM. MINERAL.	MELLUSO, L.; CONTICELLI, S.; D^ANTONIO, M.; MIRCO, N. P.; SACCANI, E.		43.5	12	0.1				XRF	SEDIMENTARY			MARL		37	0.52	11		3.89			0.08		21.6								148			97
I24		GEOROC		PETROLOGY AND MINERALOGY OF WOLLASTONITE- AND MELILITE-BEARING PARALAVAS FROM THE CENTRAL APENNINES, ITALY	AM. MINERAL.	MELLUSO, L.; CONTICELLI, S.; D^ANTONIO, M.; MIRCO, N. P.; SACCANI, E.		43.5	12	0.1				AAS	SEDIMENTARY			MARL										2.31		0.46	2.05
I24		GEOROC		PETROLOGY AND MINERALOGY OF WOLLASTONITE- AND MELILITE-BEARING PARALAVAS FROM THE CENTRAL APENNINES, ITALY	AM. MINERAL.	MELLUSO, L.; CONTICELLI, S.; D^ANTONIO, M.; MIRCO, N. P.; SACCANI, E.		43.5	12	0.1				IGN	SEDIMENTARY			MARL															20.9
I24		GEOROC		PETROLOGY AND MINERALOGY OF WOLLASTONITE- AND MELILITE-BEARING PARALAVAS FROM THE CENTRAL APENNINES, ITALY	AM. MINERAL.	MELLUSO, L.; CONTICELLI, S.; D^ANTONIO, M.; MIRCO, N. P.; SACCANI, E.		43.5	12	0.1				COL	SEDIMENTARY			MARL														0.08
I24		GEOROC		PETROLOGY AND MINERALOGY OF WOLLASTONITE- AND MELILITE-BEARING PARALAVAS FROM THE CENTRAL APENNINES, ITALY	AM. MINERAL.	MELLUSO, L.; CONTICELLI, S.; D^ANTONIO, M.; MIRCO, N. P.; SACCANI, E.		43.5	12	0.1				INAA	SEDIMENTARY			MARL																				33
I19		GEOROC		PETROLOGY AND MINERALOGY OF WOLLASTONITE- AND MELILITE-BEARING PARALAVAS FROM THE CENTRAL APENNINES, ITALY	AM. MINERAL.	MELLUSO, L.; CONTICELLI, S.; D^ANTONIO, M.; MIRCO, N. P.; SACCANI, E.		43.5	12	0.1				XRF	SEDIMENTARY			MARL		42.5	0.53	10.9		4.68			0.08		19								159			104
I19		GEOROC		PETROLOGY AND MINERALOGY OF WOLLASTONITE- AND MELILITE-BEARING PARALAVAS FROM THE CENTRAL APENNINES, ITALY	AM. MINERAL.	MELLUSO, L.; CONTICELLI, S.; D^ANTONIO, M.; MIRCO, N. P.; SACCANI, E.		43.5	12	0.1				AAS	SEDIMENTARY			MARL										2.64		0.62	1.81
I19		GEOROC		PETROLOGY AND MINERALOGY OF WOLLASTONITE- AND MELILITE-BEARING PARALAVAS FROM THE CENTRAL APENNINES, ITALY	AM. MINERAL.	MELLUSO, L.; CONTICELLI, S.; D^ANTONIO, M.; MIRCO, N. P.; SACCANI, E.		43.5	12	0.1				IGN	SEDIMENTARY			MARL															17.2
I19		GEOROC		PETROLOGY AND MINERALOGY OF WOLLASTONITE- AND MELILITE-BEARING PARALAVAS FROM THE CENTRAL APENNINES, ITALY	AM. MINERAL.	MELLUSO, L.; CONTICELLI, S.; D^ANTONIO, M.; MIRCO, N. P.; SACCANI, E.		43.5	12	0.1				COL	SEDIMENTARY			MARL														0.07
I19		GEOROC		PETROLOGY AND MINERALOGY OF WOLLASTONITE- AND MELILITE-BEARING PARALAVAS FROM THE CENTRAL APENNINES, ITALY	AM. MINERAL.	MELLUSO, L.; CONTICELLI, S.; D^ANTONIO, M.; MIRCO, N. P.; SACCANI, E.		43.5	12	0.1				INAA	SEDIMENTARY			MARL																				25
Y28		GEOROC		PETROLOGY AND MINERALOGY OF WOLLASTONITE- AND MELILITE-BEARING PARALAVAS FROM THE CENTRAL APENNINES, ITALY	AM. MINERAL.	MELLUSO, L.; CONTICELLI, S.; D^ANTONIO, M.; MIRCO, N. P.; SACCANI, E.		43.5	12	0.1				XRF	SEDIMENTARY			MARL		44.8	0.58	11.5		4.73			0.07		17								131			96
Y28		GEOROC		PETROLOGY AND MINERALOGY OF WOLLASTONITE- AND MELILITE-BEARING PARALAVAS FROM THE CENTRAL APENNINES, ITALY	AM. MINERAL.	MELLUSO, L.; CONTICELLI, S.; D^ANTONIO, M.; MIRCO, N. P.; SACCANI, E.		43.5	12	0.1				AAS	SEDIMENTARY			MARL										2.37		0.59	2.08
Y28		GEOROC		PETROLOGY AND MINERALOGY OF WOLLASTONITE- AND MELILITE-BEARING PARALAVAS FROM THE CENTRAL APENNINES, ITALY	AM. MINERAL.	MELLUSO, L.; CONTICELLI, S.; D^ANTONIO, M.; MIRCO, N. P.; SACCANI, E.		43.5	12	0.1				IGN	SEDIMENTARY			MARL															16.2
Y28		GEOROC		PETROLOGY AND MINERALOGY OF WOLLASTONITE- AND MELILITE-BEARING PARALAVAS FROM THE CENTRAL APENNINES, ITALY	AM. MINERAL.	MELLUSO, L.; CONTICELLI, S.; D^ANTONIO, M.; MIRCO, N. P.; SACCANI, E.		43.5	12	0.1				COL	SEDIMENTARY			MARL														0.08
Y28		GEOROC		PETROLOGY AND MINERALOGY OF WOLLASTONITE- AND MELILITE-BEARING PARALAVAS FROM THE CENTRAL APENNINES, ITALY	AM. MINERAL.	MELLUSO, L.; CONTICELLI, S.; D^ANTONIO, M.; MIRCO, N. P.; SACCANI, E.		43.5	12	0.1				INAA	SEDIMENTARY			MARL																				22
Y33		GEOROC		PETROLOGY AND MINERALOGY OF WOLLASTONITE- AND MELILITE-BEARING PARALAVAS FROM THE CENTRAL APENNINES, ITALY	AM. MINERAL.	MELLUSO, L.; CONTICELLI, S.; D^ANTONIO, M.; MIRCO, N. P.; SACCANI, E.		43.5	12	0.1				XRF	SEDIMENTARY			MARL		45	0.61	12.6		4.76			0.07		15.6								177
Y33		GEOROC		PETROLOGY AND MINERALOGY OF WOLLASTONITE- AND MELILITE-BEARING PARALAVAS FROM THE CENTRAL APENNINES, ITALY	AM. MINERAL.	MELLUSO, L.; CONTICELLI, S.; D^ANTONIO, M.; MIRCO, N. P.; SACCANI, E.		43.5	12	0.1				AAS	SEDIMENTARY			MARL										2.4		0.34	2.24
Y33		GEOROC		PETROLOGY AND MINERALOGY OF WOLLASTONITE- AND MELILITE-BEARING PARALAVAS FROM THE CENTRAL APENNINES, ITALY	AM. MINERAL.	MELLUSO, L.; CONTICELLI, S.; D^ANTONIO, M.; MIRCO, N. P.; SACCANI, E.		43.5	12	0.1				IGN	SEDIMENTARY			MARL															16.3
Y33		GEOROC		PETROLOGY AND MINERALOGY OF WOLLASTONITE- AND MELILITE-BEARING PARALAVAS FROM THE CENTRAL APENNINES, ITALY	AM. MINERAL.	MELLUSO, L.; CONTICELLI, S.; D^ANTONIO, M.; MIRCO, N. P.; SACCANI, E.		43.5	12	0.1				COL	SEDIMENTARY			MARL														0.08
Y33		GEOROC		PETROLOGY AND MINERALOGY OF WOLLASTONITE- AND MELILITE-BEARING PARALAVAS FROM THE CENTRAL APENNINES, ITALY	AM. MINERAL.	MELLUSO, L.; CONTICELLI, S.; D^ANTONIO, M.; MIRCO, N. P.; SACCANI, E.		43.5	12	0.1				INAA	SEDIMENTARY			MARL																				27
SD 53		GEOROC		PETROLOGY AND MINERALOGY OF WOLLASTONITE- AND MELILITE-BEARING PARALAVAS FROM THE CENTRAL APENNINES, ITALY	AM. MINERAL.	MELLUSO, L.; CONTICELLI, S.; D^ANTONIO, M.; MIRCO, N. P.; SACCANI, E.		43.5	12	0.1				XRF	SEDIMENTARY			MARL		43.9	0.6	13.8		5.99			0.23		14.4								101
SD 53		GEOROC		PETROLOGY AND MINERALOGY OF WOLLASTONITE- AND MELILITE-BEARING PARALAVAS FROM THE CENTRAL APENNINES, ITALY	AM. MINERAL.	MELLUSO, L.; CONTICELLI, S.; D^ANTONIO, M.; MIRCO, N. P.; SACCANI, E.		43.5	12	0.1				AAS	SEDIMENTARY			MARL										3.06		1.35	2.09
SD 53		GEOROC		PETROLOGY AND MINERALOGY OF WOLLASTONITE- AND MELILITE-BEARING PARALAVAS FROM THE CENTRAL APENNINES, ITALY	AM. MINERAL.	MELLUSO, L.; CONTICELLI, S.; D^ANTONIO, M.; MIRCO, N. P.; SACCANI, E.		43.5	12	0.1				IGN	SEDIMENTARY			MARL															14.6
SD 53		GEOROC		PETROLOGY AND MINERALOGY OF WOLLASTONITE- AND MELILITE-BEARING PARALAVAS FROM THE CENTRAL APENNINES, ITALY	AM. MINERAL.	MELLUSO, L.; CONTICELLI, S.; D^ANTONIO, M.; MIRCO, N. P.; SACCANI, E.		43.5	12	0.1				COL	SEDIMENTARY			MARL														0.05
SD 53		GEOROC		PETROLOGY AND MINERALOGY OF WOLLASTONITE- AND MELILITE-BEARING PARALAVAS FROM THE CENTRAL APENNINES, ITALY	AM. MINERAL.	MELLUSO, L.; CONTICELLI, S.; D^ANTONIO, M.; MIRCO, N. P.; SACCANI, E.		43.5	12	0.1				INAA	SEDIMENTARY			MARL																				20
SD 53		GEOROC		PETROLOGY AND MINERALOGY OF WOLLASTONITE- AND MELILITE-BEARING PARALAVAS FROM THE CENTRAL APENNINES, ITALY	AM. MINERAL.	MELLUSO, L.; CONTICELLI, S.; D^ANTONIO, M.; MIRCO, N. P.; SACCANI, E.		43.5	12	0.1				TIMS	SEDIMENTARY			MARL																											0.711234
SD 53		GEOROC	10.1016/j.lithos.2008.07.016	TRACE ELEMENTS AND SR-ND-PB ISOTOPES OF K-RICH, SHOSHONITIC, AND CALC-ALKALINE MAGMATISM OF THE WESTERN MEDITERRANEAN REGION: GENESIS OF ULTRAPOTASSIC TO CALC-ALKALINE MAGMATIC ASSOCIATIONS IN A POST-COLLISIONAL GEODYNAMIC SETTING	LITHOS	CONTICELLI, S.; GUARNIERI, L.; FARINELLI, A.; MATTEI, M.; AVANZINELLI, R.; BIANCHINI, G.; BOARI, E.; TOMMASINI, S.; TIEPOLO, M.; PRELEVIC, D.; VENTURELLI, G.		43.5	12	0.1				ICPMS_LA	SEDIMENTARY			MARL																			102	20
SD 53		GEOROC	10.1016/j.lithos.2008.07.016	TRACE ELEMENTS AND SR-ND-PB ISOTOPES OF K-RICH, SHOSHONITIC, AND CALC-ALKALINE MAGMATISM OF THE WESTERN MEDITERRANEAN REGION: GENESIS OF ULTRAPOTASSIC TO CALC-ALKALINE MAGMATIC ASSOCIATIONS IN A POST-COLLISIONAL GEODYNAMIC SETTING	LITHOS	CONTICELLI, S.; GUARNIERI, L.; FARINELLI, A.; MATTEI, M.; AVANZINELLI, R.; BIANCHINI, G.; BOARI, E.; TOMMASINI, S.; TIEPOLO, M.; PRELEVIC, D.; VENTURELLI, G.		43.5	12	0.1				TIMS	SEDIMENTARY			MARL																											0.711234
1149B-22R1 20-25		GEOROC	10.1016/j.epsl.2005.11.063	STABLE ISOTOPE COMPOSITIONS OF SERPENTINITE SEAMOUNTS IN THE MARIANA FOREARC: SERPENTINIZATION PROCESSES, FLUID SOURCES AND SULFUR METASOMATISM	EARTH PLANET. SCI. LETT.	ALT, J. C.; SHANKS, W. C. III		31.3422	143.351	0.0001				MS	SEDIMENTARY			MARL
SD 49		GEOROC	10.1016/j.lithos.2008.07.016	TRACE ELEMENTS AND SR-ND-PB ISOTOPES OF K-RICH, SHOSHONITIC, AND CALC-ALKALINE MAGMATISM OF THE WESTERN MEDITERRANEAN REGION: GENESIS OF ULTRAPOTASSIC TO CALC-ALKALINE MAGMATIC ASSOCIATIONS IN A POST-COLLISIONAL GEODYNAMIC SETTING	LITHOS	CONTICELLI, S.; GUARNIERI, L.; FARINELLI, A.; MATTEI, M.; AVANZINELLI, R.; BIANCHINI, G.; BOARI, E.; TOMMASINI, S.; TIEPOLO, M.; PRELEVIC, D.; VENTURELLI, G.		43.6	11.3	0.1				ICPMS_LA	SEDIMENTARY			MARLSTONE																			45	13
SD 49		GEOROC	10.1016/j.lithos.2008.07.016	TRACE ELEMENTS AND SR-ND-PB ISOTOPES OF K-RICH, SHOSHONITIC, AND CALC-ALKALINE MAGMATISM OF THE WESTERN MEDITERRANEAN REGION: GENESIS OF ULTRAPOTASSIC TO CALC-ALKALINE MAGMATIC ASSOCIATIONS IN A POST-COLLISIONAL GEODYNAMIC SETTING	LITHOS	CONTICELLI, S.; GUARNIERI, L.; FARINELLI, A.; MATTEI, M.; AVANZINELLI, R.; BIANCHINI, G.; BOARI, E.; TOMMASINI, S.; TIEPOLO, M.; PRELEVIC, D.; VENTURELLI, G.		43.6	11.3	0.1				TIMS	SEDIMENTARY			MARLSTONE																											0.708797
ALM 07		GEOROC	10.1016/j.lithos.2008.07.016	TRACE ELEMENTS AND SR-ND-PB ISOTOPES OF K-RICH, SHOSHONITIC, AND CALC-ALKALINE MAGMATISM OF THE WESTERN MEDITERRANEAN REGION: GENESIS OF ULTRAPOTASSIC TO CALC-ALKALINE MAGMATIC ASSOCIATIONS IN A POST-COLLISIONAL GEODYNAMIC SETTING	LITHOS	CONTICELLI, S.; GUARNIERI, L.; FARINELLI, A.; MATTEI, M.; AVANZINELLI, R.; BIANCHINI, G.; BOARI, E.; TOMMASINI, S.; TIEPOLO, M.; PRELEVIC, D.; VENTURELLI, G.		37.18	-1.82	0.01				ICPMS_LA	SEDIMENTARY			MARLSTONE																			20	2	10	35
ALM 07		GEOROC	10.1016/j.lithos.2008.07.016	TRACE ELEMENTS AND SR-ND-PB ISOTOPES OF K-RICH, SHOSHONITIC, AND CALC-ALKALINE MAGMATISM OF THE WESTERN MEDITERRANEAN REGION: GENESIS OF ULTRAPOTASSIC TO CALC-ALKALINE MAGMATIC ASSOCIATIONS IN A POST-COLLISIONAL GEODYNAMIC SETTING	LITHOS	CONTICELLI, S.; GUARNIERI, L.; FARINELLI, A.; MATTEI, M.; AVANZINELLI, R.; BIANCHINI, G.; BOARI, E.; TOMMASINI, S.; TIEPOLO, M.; PRELEVIC, D.; VENTURELLI, G.		37.18	-1.82	0.01				TIMS	SEDIMENTARY			MARLSTONE																											0.709399		0.512109
E-109I		GEOROC	10.1016/0301-9268(90)90005-B	ORIGIN OF LATE PRECAMBRIAN INTRUSIVE CARBONATES, EASTERN DESERT OF EGYPT AND SUDAN: C, O AND SR ISOTOPIC EVIDENCE	PREC. RESEARCH	STERN, R. J.; GWINN, C. J.		25.775	33.65	0.001				NOT	SEDIMENTARY			MARL																											0.70475
SEDA		GEOROC	10.1016/j.gca.2014.04.025	INSIGHTS FROM PB AND O ISOTOPES INTO ALONG-ARC VARIATIONS IN SUBDUCTION INPUTS AND CRUSTAL ASSIMILATION FOR VOLCANIC ROCKS IN JAVA, SUNDA ARC, INDONESIA	GEOCHIM. COSMOCHIM. ACTA	HANDLEY, H. K.; BLICHERT-TOFT, J.; GERTISSER, R.; MACPHERSON, C. G.; TURNER, SIMON P.; ZAENNUDIN, A.; ABDURRACHMAN, M.		-6.62519	106.885	1e-05				MC_ICPMS	SEDIMENTARY			MARL																											0.704339		0.512806		18.722
SEDA		GEOROC	10.1016/j.gca.2014.04.025	INSIGHTS FROM PB AND O ISOTOPES INTO ALONG-ARC VARIATIONS IN SUBDUCTION INPUTS AND CRUSTAL ASSIMILATION FOR VOLCANIC ROCKS IN JAVA, SUNDA ARC, INDONESIA	GEOCHIM. COSMOCHIM. ACTA	HANDLEY, H. K.; BLICHERT-TOFT, J.; GERTISSER, R.; MACPHERSON, C. G.; TURNER, SIMON P.; ZAENNUDIN, A.; ABDURRACHMAN, M.		-6.62519	106.885	1e-05				XRF	SEDIMENTARY			MARL		14.99	0.21	5.61		4.94			1.64	8.63	28.71	0.55	0.34	0.14	32.97
SEDA		GEOROC	10.1016/j.gca.2014.04.025	INSIGHTS FROM PB AND O ISOTOPES INTO ALONG-ARC VARIATIONS IN SUBDUCTION INPUTS AND CRUSTAL ASSIMILATION FOR VOLCANIC ROCKS IN JAVA, SUNDA ARC, INDONESIA	GEOCHIM. COSMOCHIM. ACTA	HANDLEY, H. K.; BLICHERT-TOFT, J.; GERTISSER, R.; MACPHERSON, C. G.; TURNER, SIMON P.; ZAENNUDIN, A.; ABDURRACHMAN, M.		-6.62519	106.885	1e-05				Q_ICPMS	SEDIMENTARY			MARL																			7.5	3.5	5.6	27.6
BB1		GEOROC	10.1016/S0016-7037(96)00272-4	RESOLUTION OF THE EFFECT OF CRUSTAL ASSIMILATION, SEDIMENT SUBDUCTION, AND FLUID TRANSPORT IN ISLAND ARC MAGMAS: PB-SR-ND-O ISOTOPE GEOCHEMISTRY OF GRENADA, LESSER ANTILLES	GEOCHIM. COSMOCHIM. ACTA	THIRLWALL, M. F.; GRAHAM, A. M.; ARCULUS, R. J.; HARMON, R. S.; MACPHERSON, C. G.		13.15	-59.52	0.01				TIMS	SEDIMENTARY			MARL																											0.70881		0.5122
BB4		GEOROC	10.1016/S0016-7037(96)00272-4	RESOLUTION OF THE EFFECT OF CRUSTAL ASSIMILATION, SEDIMENT SUBDUCTION, AND FLUID TRANSPORT IN ISLAND ARC MAGMAS: PB-SR-ND-O ISOTOPE GEOCHEMISTRY OF GRENADA, LESSER ANTILLES	GEOCHIM. COSMOCHIM. ACTA	THIRLWALL, M. F.; GRAHAM, A. M.; ARCULUS, R. J.; HARMON, R. S.; MACPHERSON, C. G.		13.15	-59.52	0.01				TIMS	SEDIMENTARY			MARL																											0.70889		0.51223		19.411
AE856		USGS		Geochemistry of rock samples from the National Geochemical Database: U.S. Geological Survey, Reston, VA.	U.S. Geological Survey	USGS		18.0583	-67.075	0.01				AAS	SEDIMENTARY	UNKNOWN	UNKNOWN	MARL																						36
AE856		USGS		Geochemistry of rock samples from the National Geochemical Database: U.S. Geological Survey, Reston, VA.	U.S. Geological Survey	USGS		18.0583	-67.075	0.01				ES	SEDIMENTARY	UNKNOWN	UNKNOWN	MARL																	7	700		15	20				10	0.7
C221129		USGS		Geochemistry of rock samples from the National Geochemical Database: U.S. Geological Survey, Reston, VA.	U.S. Geological Survey	USGS		27.6939	85.0971	0.01				ICPAES	SEDIMENTARY	UNKNOWN	UNKNOWN	MARLSTONE																	3.4	375	29	9.6		12		8.5	0.32	0.49
C221129		USGS		Geochemistry of rock samples from the National Geochemical Database: U.S. Geological Survey, Reston, VA.	U.S. Geological Survey	USGS		27.6939	85.0971	0.01				XRF	SEDIMENTARY	UNKNOWN	UNKNOWN	MARLSTONE																			29		2	15
D129665		USGS		Geochemistry of rock samples from the National Geochemical Database: U.S. Geological Survey, Reston, VA.	U.S. Geological Survey	USGS		41.5333	-109.35	0.01	18	18	18	UNKNOWN	SEDIMENTARY	UNKNOWN	UNKNOWN	MARLSTONE																	3	1000	15	7	50			3		7
D129674		USGS		Geochemistry of rock samples from the National Geochemical Database: U.S. Geological Survey, Reston, VA.	U.S. Geological Survey	USGS		39.5833	-108.95	0.01	18	18	18	UNKNOWN	SEDIMENTARY	UNKNOWN	UNKNOWN	MARL																0.7	0.5	1000			5			0.15		7
D167768		USGS		Geochemistry of rock samples from the National Geochemical Database: U.S. Geological Survey, Reston, VA.	U.S. Geological Survey	USGS		39.2711	-113.656	0.01	68	68	68	UNKNOWN	SEDIMENTARY	UNKNOWN	UNKNOWN	MARLSTONE										0.56	6.15						1.5	70	30	10	15			7	5	0.7
D192088		USGS		Geochemistry of rock samples from the National Geochemical Database: U.S. Geological Survey, Reston, VA.	U.S. Geological Survey	USGS		32.75	-114.25	0.01	3	3	3	UNKNOWN	SEDIMENTARY	UNKNOWN	UNKNOWN	MARL																	1.5	700	7	3	20		1.5	3		0.7
D210195		USGS		Geochemistry of rock samples from the National Geochemical Database: U.S. Geological Survey, Reston, VA.	U.S. Geological Survey	USGS		68.3131	-152.705	0.01	65	65	65	DNAA	SEDIMENTARY	UNKNOWN	UNKNOWN	MARLSTONE
D258458		USGS		Geochemistry of rock samples from the National Geochemical Database: U.S. Geological Survey, Reston, VA.	U.S. Geological Survey	USGS		33.25	-110.25	0.01	7	9	11	DNAA	SEDIMENTARY	UNKNOWN	UNKNOWN	MARL
ESA270		USGS		Geochemistry of rock samples from the National Geochemical Database: U.S. Geological Survey, Reston, VA.	U.S. Geological Survey	USGS		42.8633	-97.6461	0.01	65	65	65	ES	SEDIMENTARY	UNKNOWN	UNKNOWN	MARL																	5	100	100	20	100				2	1
ESA271		USGS		Geochemistry of rock samples from the National Geochemical Database: U.S. Geological Survey, Reston, VA.	U.S. Geological Survey	USGS		42.8633	-97.6461	0.01	65	65	65	ES	SEDIMENTARY	UNKNOWN	UNKNOWN	MARL																	1	1000	20		50					0.5
ESA272		USGS		Geochemistry of rock samples from the National Geochemical Database: U.S. Geological Survey, Reston, VA.	U.S. Geological Survey	USGS		42.8633	-97.6461	0.01	65	65	65	ES	SEDIMENTARY	UNKNOWN	UNKNOWN	MARL																	0.7	700	30		30					0.2
ESA273		USGS		Geochemistry of rock samples from the National Geochemical Database: U.S. Geological Survey, Reston, VA.	U.S. Geological Survey	USGS		42.8633	-97.6461	0.01	65	65	65	ES	SEDIMENTARY	UNKNOWN	UNKNOWN	MARL																	1.5	700	100	15	50		0.7			0.3
ESA274		USGS		Geochemistry of rock samples from the National Geochemical Database: U.S. Geological Survey, Reston, VA.	U.S. Geological Survey	USGS		42.8633	-97.6461	0.01	65	65	65	ES	SEDIMENTARY	UNKNOWN	UNKNOWN	MARL																	3	500	100	20	50		0.7			0.7
ESA275		USGS		Geochemistry of rock samples from the National Geochemical Database: U.S. Geological Survey, Reston, VA.	U.S. Geological Survey	USGS		42.8633	-97.6461	0.01	65	65	65	ES	SEDIMENTARY	UNKNOWN	UNKNOWN	MARL																	5	700	150	20	50	200	0.7			0.15
ESA276		USGS		Geochemistry of rock samples from the National Geochemical Database: U.S. Geological Survey, Reston, VA.	U.S. Geological Survey	USGS		42.8633	-97.6461	0.01	65	65	65	ES	SEDIMENTARY	UNKNOWN	UNKNOWN	MARL																	2	300	100	10	50		0.5			0.15
ESA277		USGS		Geochemistry of rock samples from the National Geochemical Database: U.S. Geological Survey, Reston, VA.	U.S. Geological Survey	USGS		42.8633	-97.6461	0.01	65	65	65	ES	SEDIMENTARY	UNKNOWN	UNKNOWN	MARL																	5	300	150	20	50					0.15
ESA278		USGS		Geochemistry of rock samples from the National Geochemical Database: U.S. Geological Survey, Reston, VA.	U.S. Geological Survey	USGS		42.8633	-97.6461	0.01	65	65	65	ES	SEDIMENTARY	UNKNOWN	UNKNOWN	MARL																	5	300	150	20	50					0.2
ESA279		USGS		Geochemistry of rock samples from the National Geochemical Database: U.S. Geological Survey, Reston, VA.	U.S. Geological Survey	USGS		42.8633	-97.6461	0.01	65	65	65	ES	SEDIMENTARY	UNKNOWN	UNKNOWN	MARL																	3	200	100	15	30					0.07
ESA280		USGS		Geochemistry of rock samples from the National Geochemical Database: U.S. Geological Survey, Reston, VA.	U.S. Geological Survey	USGS		42.8633	-97.6461	0.01	65	65	65	ES	SEDIMENTARY	UNKNOWN	UNKNOWN	MARL																	2	150	100	15	50					0.1
ESA281		USGS		Geochemistry of rock samples from the National Geochemical Database: U.S. Geological Survey, Reston, VA.	U.S. Geological Survey	USGS		42.8633	-97.6461	0.01	65	65	65	ES	SEDIMENTARY	UNKNOWN	UNKNOWN	MARL																	5	200	150	15	50					0.3
ESA282		USGS		Geochemistry of rock samples from the National Geochemical Database: U.S. Geological Survey, Reston, VA.	U.S. Geological Survey	USGS		42.8633	-97.6461	0.01	65	65	65	ES	SEDIMENTARY	UNKNOWN	UNKNOWN	MARL																	5	100	150	15	50					0.2
ESA283		USGS		Geochemistry of rock samples from the National Geochemical Database: U.S. Geological Survey, Reston, VA.	U.S. Geological Survey	USGS		42.8633	-97.6461	0.01	65	65	65	ES	SEDIMENTARY	UNKNOWN	UNKNOWN	MARL																	3	150	70	5	30					0.15
ESA284		USGS		Geochemistry of rock samples from the National Geochemical Database: U.S. Geological Survey, Reston, VA.	U.S. Geological Survey	USGS		42.8633	-97.6461	0.01	65	65	65	ES	SEDIMENTARY	UNKNOWN	UNKNOWN	MARL																	1.5	200	50		20					0.2
ESA285		USGS		Geochemistry of rock samples from the National Geochemical Database: U.S. Geological Survey, Reston, VA.	U.S. Geological Survey	USGS		42.8633	-97.6461	0.01	65	65	65	ES	SEDIMENTARY	UNKNOWN	UNKNOWN	MARL																	1	200	50		15					0.1
ESA286		USGS		Geochemistry of rock samples from the National Geochemical Database: U.S. Geological Survey, Reston, VA.	U.S. Geological Survey	USGS		42.8633	-97.6461	0.01	65	65	65	ES	SEDIMENTARY	UNKNOWN	UNKNOWN	MARL																	1.5	200	70		20					0.15
ESA287		USGS		Geochemistry of rock samples from the National Geochemical Database: U.S. Geological Survey, Reston, VA.	U.S. Geological Survey	USGS		42.8633	-97.6461	0.01	65	65	65	ES	SEDIMENTARY	UNKNOWN	UNKNOWN	MARL																	1.5	100	70		30					0.2
ESA288		USGS		Geochemistry of rock samples from the National Geochemical Database: U.S. Geological Survey, Reston, VA.	U.S. Geological Survey	USGS		42.8633	-97.6461	0.01	65	65	65	ES	SEDIMENTARY	UNKNOWN	UNKNOWN	MARL																	1	100	50		20					0.3
ESA289		USGS		Geochemistry of rock samples from the National Geochemical Database: U.S. Geological Survey, Reston, VA.	U.S. Geological Survey	USGS		42.8633	-97.6461	0.01	65	65	65	ES	SEDIMENTARY	UNKNOWN	UNKNOWN	MARL																	1	100	50		30					0.15
ESA290		USGS		Geochemistry of rock samples from the National Geochemical Database: U.S. Geological Survey, Reston, VA.	U.S. Geological Survey	USGS		42.8633	-97.6461	0.01	65	65	65	ES	SEDIMENTARY	UNKNOWN	UNKNOWN	MARL																	1	150	50		30					0.2
ESA291		USGS		Geochemistry of rock samples from the National Geochemical Database: U.S. Geological Survey, Reston, VA.	U.S. Geological Survey	USGS		42.8633	-97.6461	0.01	65	65	65	ES	SEDIMENTARY	UNKNOWN	UNKNOWN	MARL																	1	100	70		30					0.15
ESA292		USGS		Geochemistry of rock samples from the National Geochemical Database: U.S. Geological Survey, Reston, VA.	U.S. Geological Survey	USGS		42.8633	-97.6461	0.01	65	65	65	ES	SEDIMENTARY	UNKNOWN	UNKNOWN	MARL																	1	100	70	7	50					0.2
ESA293		USGS		Geochemistry of rock samples from the National Geochemical Database: U.S. Geological Survey, Reston, VA.	U.S. Geological Survey	USGS		42.8633	-97.6461	0.01	65	65	65	ES	SEDIMENTARY	UNKNOWN	UNKNOWN	MARL																	2	100	50	15	30	200	1			0.3
ESA294		USGS		Geochemistry of rock samples from the National Geochemical Database: U.S. Geological Survey, Reston, VA.	U.S. Geological Survey	USGS		42.8633	-97.6461	0.01	65	65	65	ES	SEDIMENTARY	UNKNOWN	UNKNOWN	MARL																	1.5	100	100	15	30	200				0.5
ESA295		USGS		Geochemistry of rock samples from the National Geochemical Database: U.S. Geological Survey, Reston, VA.	U.S. Geological Survey	USGS		42.8633	-97.6461	0.01	65	65	65	ES	SEDIMENTARY	UNKNOWN	UNKNOWN	MARL																	1.5	150	70	10	50	200	0.7			0.3
ESA296		USGS		Geochemistry of rock samples from the National Geochemical Database: U.S. Geological Survey, Reston, VA.	U.S. Geological Survey	USGS		42.8633	-97.6461	0.01	65	65	65	ES	SEDIMENTARY	UNKNOWN	UNKNOWN	MARL																	1.5	70	50	10	50		0.5			0.5
ESA297		USGS		Geochemistry of rock samples from the National Geochemical Database: U.S. Geological Survey, Reston, VA.	U.S. Geological Survey	USGS		42.8633	-97.6461	0.01	65	65	65	ES	SEDIMENTARY	UNKNOWN	UNKNOWN	MARL																	0.7	100	20		30					0.3
ESA298		USGS		Geochemistry of rock samples from the National Geochemical Database: U.S. Geological Survey, Reston, VA.	U.S. Geological Survey	USGS		42.8633	-97.6461	0.01	65	65	65	ES	SEDIMENTARY	UNKNOWN	UNKNOWN	MARL																	0.7	100	20		50					0.5
ESA299		USGS		Geochemistry of rock samples from the National Geochemical Database: U.S. Geological Survey, Reston, VA.	U.S. Geological Survey	USGS		42.8633	-97.6461	0.01	65	65	65	ES	SEDIMENTARY	UNKNOWN	UNKNOWN	MARL																	1	100	20		70					0.5
ESA300		USGS		Geochemistry of rock samples from the National Geochemical Database: U.S. Geological Survey, Reston, VA.	U.S. Geological Survey	USGS		42.8633	-97.6461	0.01	65	65	65	ES	SEDIMENTARY	UNKNOWN	UNKNOWN	MARL																	1	200	20		50					0.5
ESA301		USGS		Geochemistry of rock samples from the National Geochemical Database: U.S. Geological Survey, Reston, VA.	U.S. Geological Survey	USGS		42.8633	-97.6461	0.01	65	65	65	ES	SEDIMENTARY	UNKNOWN	UNKNOWN	MARL																	0.7	100	20		70					0.5
ESA302		USGS		Geochemistry of rock samples from the National Geochemical Database: U.S. Geological Survey, Reston, VA.	U.S. Geological Survey	USGS		42.8633	-97.6461	0.01	65	65	65	ES	SEDIMENTARY	UNKNOWN	UNKNOWN	MARL																	1	100	20	7	30					0.5
ESA303		USGS		Geochemistry of rock samples from the National Geochemical Database: U.S. Geological Survey, Reston, VA.	U.S. Geological Survey	USGS		42.8633	-97.6461	0.01	65	65	65	ES	SEDIMENTARY	UNKNOWN	UNKNOWN	MARL																	1	150	20	10	50					0.7
ESA304		USGS		Geochemistry of rock samples from the National Geochemical Database: U.S. Geological Survey, Reston, VA.	U.S. Geological Survey	USGS		42.8633	-97.6461	0.01	65	65	65	ES	SEDIMENTARY	UNKNOWN	UNKNOWN	MARL																	1.5	150	20	10	70					0.5
ESA305		USGS		Geochemistry of rock samples from the National Geochemical Database: U.S. Geological Survey, Reston, VA.	U.S. Geological Survey	USGS		42.8633	-97.6461	0.01	65	65	65	ES	SEDIMENTARY	UNKNOWN	UNKNOWN	MARL																	1.5	200	20	15	70					1
ESA306		USGS		Geochemistry of rock samples from the National Geochemical Database: U.S. Geological Survey, Reston, VA.	U.S. Geological Survey	USGS		42.8633	-97.6461	0.01	65	65	65	ES	SEDIMENTARY	UNKNOWN	UNKNOWN	MARL																	3	200	30	15	70				20	1
ESA307		USGS		Geochemistry of rock samples from the National Geochemical Database: U.S. Geological Survey, Reston, VA.	U.S. Geological Survey	USGS		42.8633	-97.6461	0.01	65	65	65	ES	SEDIMENTARY	UNKNOWN	UNKNOWN	MARL																	1.5	700	7		50					1
ESA308		USGS		Geochemistry of rock samples from the National Geochemical Database: U.S. Geological Survey, Reston, VA.	U.S. Geological Survey	USGS		42.8633	-97.6461	0.01	65	65	65	ES	SEDIMENTARY	UNKNOWN	UNKNOWN	MARL																	1	300	20	7	100					0.7
ESA309		USGS		Geochemistry of rock samples from the National Geochemical Database: U.S. Geological Survey, Reston, VA.	U.S. Geological Survey	USGS		42.8633	-97.6461	0.01	65	65	65	ES	SEDIMENTARY	UNKNOWN	UNKNOWN	MARL																	1	500	10		70					0.7
ESA310		USGS		Geochemistry of rock samples from the National Geochemical Database: U.S. Geological Survey, Reston, VA.	U.S. Geological Survey	USGS		42.8633	-97.6461	0.01	65	65	65	ES	SEDIMENTARY	UNKNOWN	UNKNOWN	MARL																	0.7	500	7		50					0.5
ESA311		USGS		Geochemistry of rock samples from the National Geochemical Database: U.S. Geological Survey, Reston, VA.	U.S. Geological Survey	USGS		42.8633	-97.6461	0.01	65	65	65	ES	SEDIMENTARY	UNKNOWN	UNKNOWN	MARL																	5	100	100	20	150					0.5
ESA312		USGS		Geochemistry of rock samples from the National Geochemical Database: U.S. Geological Survey, Reston, VA.	U.S. Geological Survey	USGS		42.8633	-97.6461	0.01	65	65	65	ES	SEDIMENTARY	UNKNOWN	UNKNOWN	MARL																	2	100	50	5	100					0.5
MAI113		USGS		Geochemistry of rock samples from the National Geochemical Database: U.S. Geological Survey, Reston, VA.	U.S. Geological Survey	USGS		37.85	-117.467	0.01	2	2	2	AAS	SEDIMENTARY	UNKNOWN	UNKNOWN	MARL
B-4		GEOROC	10.1016/j.epsl.2009.07.043	THE "ZIRCON EFFECT" AS RECORDED BY THE CHEMICAL AND HF ISOTOPIC COMPOSITIONS OF LESSER ANTILLES FOREARC SEDIMENTS	EARTH PLANET. SCI. LETT.	CARPENTIER, M.; CHAUVEL, C.; MAURY, R. C.; MATTIELLI, N.		-13.1833	59.4717	0.0001				ICPMS	SEDIMENTARY			MARL
B-7		GEOROC	10.1016/j.epsl.2009.07.043	THE "ZIRCON EFFECT" AS RECORDED BY THE CHEMICAL AND HF ISOTOPIC COMPOSITIONS OF LESSER ANTILLES FOREARC SEDIMENTS	EARTH PLANET. SCI. LETT.	CARPENTIER, M.; CHAUVEL, C.; MAURY, R. C.; MATTIELLI, N.		-13.2983	59.575	0.0001				ICPMS	SEDIMENTARY			MARL
SD 47		GEOROC	10.1029/2019GC008193	CE/MO AND MOLYBDENUM ISOTOPE SYSTEMATICS IN SUBDUCTION-RELATED OROGENIC POTASSIC MAGMAS OF CENTRAL-SOUTHERN ITALY	GEOCHEMISTRY GEOPHYSICS GEOSYSTEMS	CASALINI, M.; AVANZINELLI, R.; TOMMASINI, S.; ELLIOTT, T. R.; CONTICELLI, S.		44	10	0.1				MC_ICPMS	SEDIMENTARY			MARLSTONE
SD 47		GEOROC	10.1029/2019GC008193	CE/MO AND MOLYBDENUM ISOTOPE SYSTEMATICS IN SUBDUCTION-RELATED OROGENIC POTASSIC MAGMAS OF CENTRAL-SOUTHERN ITALY	GEOCHEMISTRY GEOPHYSICS GEOSYSTEMS	CASALINI, M.; AVANZINELLI, R.; TOMMASINI, S.; ELLIOTT, T. R.; CONTICELLI, S.		44	10	0.1				TIMS	SEDIMENTARY			MARLSTONE																											0.70789		0.512099
SD 44		GEOROC	10.1029/2019GC008193	CE/MO AND MOLYBDENUM ISOTOPE SYSTEMATICS IN SUBDUCTION-RELATED OROGENIC POTASSIC MAGMAS OF CENTRAL-SOUTHERN ITALY	GEOCHEMISTRY GEOPHYSICS GEOSYSTEMS	CASALINI, M.; AVANZINELLI, R.; TOMMASINI, S.; ELLIOTT, T. R.; CONTICELLI, S.		44	10	0.1				MC_ICPMS	SEDIMENTARY			MARLSTONE
SD 44		GEOROC	10.1029/2019GC008193	CE/MO AND MOLYBDENUM ISOTOPE SYSTEMATICS IN SUBDUCTION-RELATED OROGENIC POTASSIC MAGMAS OF CENTRAL-SOUTHERN ITALY	GEOCHEMISTRY GEOPHYSICS GEOSYSTEMS	CASALINI, M.; AVANZINELLI, R.; TOMMASINI, S.; ELLIOTT, T. R.; CONTICELLI, S.		44	10	0.1				TIMS	SEDIMENTARY			MARLSTONE																											0.707973		0.512234
SD 48		GEOROC	10.1029/2019GC008193	CE/MO AND MOLYBDENUM ISOTOPE SYSTEMATICS IN SUBDUCTION-RELATED OROGENIC POTASSIC MAGMAS OF CENTRAL-SOUTHERN ITALY	GEOCHEMISTRY GEOPHYSICS GEOSYSTEMS	CASALINI, M.; AVANZINELLI, R.; TOMMASINI, S.; ELLIOTT, T. R.; CONTICELLI, S.		44	10	0.1				MC_ICPMS	SEDIMENTARY			MARLSTONE
SD 48		GEOROC	10.1130/G39766.1	CARBON FLUXES FROM SUBDUCTED CARBONATES REVEALED BY URANIUM EXCESS AT MOUNT VESUVIUS, ITALY	GEOLOGY	AVANZINELLI, R.; CASALINI, M.; ELLIOTT, T. R.; CONTICELLI, S.		44	10	0.1				TIMS	SEDIMENTARY			MARLSTONE																											0.70804		0.512163		18.864
SD 48		GEOROC	10.1130/G39766.1	CARBON FLUXES FROM SUBDUCTED CARBONATES REVEALED BY URANIUM EXCESS AT MOUNT VESUVIUS, ITALY	GEOLOGY	AVANZINELLI, R.; CASALINI, M.; ELLIOTT, T. R.; CONTICELLI, S.		44	10	0.1				ICPMS	SEDIMENTARY			MARLSTONE																			48	9.4	64.5	300
SD 48		GEOROC	10.1130/G39766.1	CARBON FLUXES FROM SUBDUCTED CARBONATES REVEALED BY URANIUM EXCESS AT MOUNT VESUVIUS, ITALY	GEOLOGY	AVANZINELLI, R.; CASALINI, M.; ELLIOTT, T. R.; CONTICELLI, S.		44	10	0.1				IGN	SEDIMENTARY			MARLSTONE															29.66
SD 48		GEOROC	10.1130/G39766.1	CARBON FLUXES FROM SUBDUCTED CARBONATES REVEALED BY URANIUM EXCESS AT MOUNT VESUVIUS, ITALY	GEOLOGY	AVANZINELLI, R.; CASALINI, M.; ELLIOTT, T. R.; CONTICELLI, S.		44	10	0.1				ICPAES	SEDIMENTARY			MARLSTONE		23.88	0.29	6.45		2.25			0.09	1.45	34.15	0.6	1.19
SD 34		GEOROC	10.1029/2019GC008193	CE/MO AND MOLYBDENUM ISOTOPE SYSTEMATICS IN SUBDUCTION-RELATED OROGENIC POTASSIC MAGMAS OF CENTRAL-SOUTHERN ITALY	GEOCHEMISTRY GEOPHYSICS GEOSYSTEMS	CASALINI, M.; AVANZINELLI, R.; TOMMASINI, S.; ELLIOTT, T. R.; CONTICELLI, S.		44	10	0.1				MC_ICPMS	SEDIMENTARY			MARLSTONE
SD 34		GEOROC	10.1029/2019GC008193	CE/MO AND MOLYBDENUM ISOTOPE SYSTEMATICS IN SUBDUCTION-RELATED OROGENIC POTASSIC MAGMAS OF CENTRAL-SOUTHERN ITALY	GEOCHEMISTRY GEOPHYSICS GEOSYSTEMS	CASALINI, M.; AVANZINELLI, R.; TOMMASINI, S.; ELLIOTT, T. R.; CONTICELLI, S.		44	10	0.1				TIMS	SEDIMENTARY			MARLSTONE																											0.710656		0.512058
SD 53		GEOROC	10.1029/2019GC008193	CE/MO AND MOLYBDENUM ISOTOPE SYSTEMATICS IN SUBDUCTION-RELATED OROGENIC POTASSIC MAGMAS OF CENTRAL-SOUTHERN ITALY	GEOCHEMISTRY GEOPHYSICS GEOSYSTEMS	CASALINI, M.; AVANZINELLI, R.; TOMMASINI, S.; ELLIOTT, T. R.; CONTICELLI, S.		44	10	0.1				MC_ICPMS	SEDIMENTARY			MARLSTONE
SD 53		GEOROC	10.1029/2019GC008193	CE/MO AND MOLYBDENUM ISOTOPE SYSTEMATICS IN SUBDUCTION-RELATED OROGENIC POTASSIC MAGMAS OF CENTRAL-SOUTHERN ITALY	GEOCHEMISTRY GEOPHYSICS GEOSYSTEMS	CASALINI, M.; AVANZINELLI, R.; TOMMASINI, S.; ELLIOTT, T. R.; CONTICELLI, S.		44	10	0.1				TIMS	SEDIMENTARY			MARLSTONE																											0.70983		0.512179
SD 11		GEOROC	10.1029/2019GC008193	CE/MO AND MOLYBDENUM ISOTOPE SYSTEMATICS IN SUBDUCTION-RELATED OROGENIC POTASSIC MAGMAS OF CENTRAL-SOUTHERN ITALY	GEOCHEMISTRY GEOPHYSICS GEOSYSTEMS	CASALINI, M.; AVANZINELLI, R.; TOMMASINI, S.; ELLIOTT, T. R.; CONTICELLI, S.		44	10	0.1				MC_ICPMS	SEDIMENTARY			MARLSTONE
SD 11		GEOROC	10.1130/G39766.1	CARBON FLUXES FROM SUBDUCTED CARBONATES REVEALED BY URANIUM EXCESS AT MOUNT VESUVIUS, ITALY	GEOLOGY	AVANZINELLI, R.; CASALINI, M.; ELLIOTT, T. R.; CONTICELLI, S.		44	10	0.1				ICPAES	SEDIMENTARY			MARLSTONE		57.39	0.44	11.15		3.25			0.07	2.84	10.55	1.86	1.96
SD 11		GEOROC	10.1130/G39766.1	CARBON FLUXES FROM SUBDUCTED CARBONATES REVEALED BY URANIUM EXCESS AT MOUNT VESUVIUS, ITALY	GEOLOGY	AVANZINELLI, R.; CASALINI, M.; ELLIOTT, T. R.; CONTICELLI, S.		44	10	0.1				IGN	SEDIMENTARY			MARLSTONE															10.5
SD 11		GEOROC	10.1130/G39766.1	CARBON FLUXES FROM SUBDUCTED CARBONATES REVEALED BY URANIUM EXCESS AT MOUNT VESUVIUS, ITALY	GEOLOGY	AVANZINELLI, R.; CASALINI, M.; ELLIOTT, T. R.; CONTICELLI, S.		44	10	0.1				ICPMS	SEDIMENTARY			MARLSTONE																			43	6.1	6.1	142
SD 11		GEOROC	10.1130/G39766.1	CARBON FLUXES FROM SUBDUCTED CARBONATES REVEALED BY URANIUM EXCESS AT MOUNT VESUVIUS, ITALY	GEOLOGY	AVANZINELLI, R.; CASALINI, M.; ELLIOTT, T. R.; CONTICELLI, S.		44	10	0.1				TIMS	SEDIMENTARY			MARLSTONE																											0.710361		0.512205		18.851
SD 41		GEOROC	10.1029/2019GC008193	CE/MO AND MOLYBDENUM ISOTOPE SYSTEMATICS IN SUBDUCTION-RELATED OROGENIC POTASSIC MAGMAS OF CENTRAL-SOUTHERN ITALY	GEOCHEMISTRY GEOPHYSICS GEOSYSTEMS	CASALINI, M.; AVANZINELLI, R.; TOMMASINI, S.; ELLIOTT, T. R.; CONTICELLI, S.		44	10	0.1				MC_ICPMS	SEDIMENTARY			MARLSTONE
SD 41		GEOROC	10.1029/2019GC008193	CE/MO AND MOLYBDENUM ISOTOPE SYSTEMATICS IN SUBDUCTION-RELATED OROGENIC POTASSIC MAGMAS OF CENTRAL-SOUTHERN ITALY	GEOCHEMISTRY GEOPHYSICS GEOSYSTEMS	CASALINI, M.; AVANZINELLI, R.; TOMMASINI, S.; ELLIOTT, T. R.; CONTICELLI, S.		44	10	0.1				TIMS	SEDIMENTARY			MARLSTONE																											0.719258		0.51205
SD 55		GEOROC	10.1029/2019GC008193	CE/MO AND MOLYBDENUM ISOTOPE SYSTEMATICS IN SUBDUCTION-RELATED OROGENIC POTASSIC MAGMAS OF CENTRAL-SOUTHERN ITALY	GEOCHEMISTRY GEOPHYSICS GEOSYSTEMS	CASALINI, M.; AVANZINELLI, R.; TOMMASINI, S.; ELLIOTT, T. R.; CONTICELLI, S.		44	10	0.1				MC_ICPMS	SEDIMENTARY			MARLSTONE
SD 55		GEOROC	10.1029/2019GC008193	CE/MO AND MOLYBDENUM ISOTOPE SYSTEMATICS IN SUBDUCTION-RELATED OROGENIC POTASSIC MAGMAS OF CENTRAL-SOUTHERN ITALY	GEOCHEMISTRY GEOPHYSICS GEOSYSTEMS	CASALINI, M.; AVANZINELLI, R.; TOMMASINI, S.; ELLIOTT, T. R.; CONTICELLI, S.		44	10	0.1				TIMS	SEDIMENTARY			MARLSTONE																											0.714071		0.512113
SD 42		GEOROC	10.1029/2019GC008193	CE/MO AND MOLYBDENUM ISOTOPE SYSTEMATICS IN SUBDUCTION-RELATED OROGENIC POTASSIC MAGMAS OF CENTRAL-SOUTHERN ITALY	GEOCHEMISTRY GEOPHYSICS GEOSYSTEMS	CASALINI, M.; AVANZINELLI, R.; TOMMASINI, S.; ELLIOTT, T. R.; CONTICELLI, S.		44	10	0.1				MC_ICPMS	SEDIMENTARY			MARLSTONE
SD 42		GEOROC	10.1029/2019GC008193	CE/MO AND MOLYBDENUM ISOTOPE SYSTEMATICS IN SUBDUCTION-RELATED OROGENIC POTASSIC MAGMAS OF CENTRAL-SOUTHERN ITALY	GEOCHEMISTRY GEOPHYSICS GEOSYSTEMS	CASALINI, M.; AVANZINELLI, R.; TOMMASINI, S.; ELLIOTT, T. R.; CONTICELLI, S.		44	10	0.1				TIMS	SEDIMENTARY			MARLSTONE																											0.713876		0.512091
SD 75		GEOROC	10.1029/2019GC008193	CE/MO AND MOLYBDENUM ISOTOPE SYSTEMATICS IN SUBDUCTION-RELATED OROGENIC POTASSIC MAGMAS OF CENTRAL-SOUTHERN ITALY	GEOCHEMISTRY GEOPHYSICS GEOSYSTEMS	CASALINI, M.; AVANZINELLI, R.; TOMMASINI, S.; ELLIOTT, T. R.; CONTICELLI, S.		44	10	0.1				MC_ICPMS	SEDIMENTARY			MARLSTONE
SD 75		GEOROC	10.1029/2019GC008193	CE/MO AND MOLYBDENUM ISOTOPE SYSTEMATICS IN SUBDUCTION-RELATED OROGENIC POTASSIC MAGMAS OF CENTRAL-SOUTHERN ITALY	GEOCHEMISTRY GEOPHYSICS GEOSYSTEMS	CASALINI, M.; AVANZINELLI, R.; TOMMASINI, S.; ELLIOTT, T. R.; CONTICELLI, S.		44	10	0.1				TIMS	SEDIMENTARY			MARLSTONE																											0.721512		0.512048		18.612
SD 62		GEOROC	10.1029/2019GC008193	CE/MO AND MOLYBDENUM ISOTOPE SYSTEMATICS IN SUBDUCTION-RELATED OROGENIC POTASSIC MAGMAS OF CENTRAL-SOUTHERN ITALY	GEOCHEMISTRY GEOPHYSICS GEOSYSTEMS	CASALINI, M.; AVANZINELLI, R.; TOMMASINI, S.; ELLIOTT, T. R.; CONTICELLI, S.		44	10	0.1				MC_ICPMS	SEDIMENTARY			MARLSTONE
SD 62		GEOROC	10.1029/2019GC008193	CE/MO AND MOLYBDENUM ISOTOPE SYSTEMATICS IN SUBDUCTION-RELATED OROGENIC POTASSIC MAGMAS OF CENTRAL-SOUTHERN ITALY	GEOCHEMISTRY GEOPHYSICS GEOSYSTEMS	CASALINI, M.; AVANZINELLI, R.; TOMMASINI, S.; ELLIOTT, T. R.; CONTICELLI, S.		44	10	0.1				TIMS	SEDIMENTARY			MARLSTONE																											0.729177		0.511966
MF		GEOROC	10.1016/j.gca.2020.01.020	CLUMPED ISOTOPE GEOCHEMISTRY OF CARBONATITES IN THE NORTH-WESTERN DECCAN IGNEOUS PROVINCE: ASPECTS OF EVOLUTION, POST-DEPOSITIONAL ALTERATION AND MINERALISATION	GEOCHIM. COSMOCHIM. ACTA	FOSU, B. R.; GHOSH, P. K.; VILADKAR, S. G.		22.0564	74.0735	0.0001				MS	SEDIMENTARY			MARL
[truncated: 59 more columns]

## Sheet: References
References
AUTHOR	YEAR	TITLE	JOURNAL
ALT, J. C.; SHANKS, W. C. III	2006	STABLE ISOTOPE COMPOSITIONS OF SERPENTINITE SEAMOUNTS IN THE MARIANA FOREARC: SERPENTINIZATION PROCESSES, FLUID SOURCES AND SULFUR METASOMATISM	EARTH PLANET. SCI. LETT.
ALT, J. C.; SHANKS, W. C. III	2006	STABLE ISOTOPE COMPOSITIONS OF SERPENTINITE SEAMOUNTS IN THE MARIANA FOREARC: SERPENTINIZATION PROCESSES, FLUID SOURCES AND SULFUR METASOMATISM	EARTH PLANET. SCI. LETT.
AVANZINELLI, R.; CASALINI, M.; ELLIOTT, T. R.; CONTICELLI, S.	2018	CARBON FLUXES FROM SUBDUCTED CARBONATES REVEALED BY URANIUM EXCESS AT MOUNT VESUVIUS, ITALY	GEOLOGY
AVANZINELLI, R.; CASALINI, M.; ELLIOTT, T. R.; CONTICELLI, S.	2018	CARBON FLUXES FROM SUBDUCTED CARBONATES REVEALED BY URANIUM EXCESS AT MOUNT VESUVIUS, ITALY	GEOLOGY
CARPENTIER, M.; CHAUVEL, C.; MAURY, R. C.; MATTIELLI, N.	2009	THE "ZIRCON EFFECT" AS RECORDED BY THE CHEMICAL AND HF ISOTOPIC COMPOSITIONS OF LESSER ANTILLES FOREARC SEDIMENTS	EARTH PLANET. SCI. LETT.
CARPENTIER, M.; CHAUVEL, C.; MAURY, R. C.; MATTIELLI, N.	2009	THE "ZIRCON EFFECT" AS RECORDED BY THE CHEMICAL AND HF ISOTOPIC COMPOSITIONS OF LESSER ANTILLES FOREARC SEDIMENTS	EARTH PLANET. SCI. LETT.
CASALINI, M.; AVANZINELLI, R.; TOMMASINI, S.; ELLIOTT, T. R.; CONTICELLI, S.	2019	CE/MO AND MOLYBDENUM ISOTOPE SYSTEMATICS IN SUBDUCTION-RELATED OROGENIC POTASSIC MAGMAS OF CENTRAL-SOUTHERN ITALY	GEOCHEMISTRY GEOPHYSICS GEOSYSTEMS
CASALINI, M.; AVANZINELLI, R.; TOMMASINI, S.; ELLIOTT, T. R.; CONTICELLI, S.	2019	CE/MO AND MOLYBDENUM ISOTOPE SYSTEMATICS IN SUBDUCTION-RELATED OROGENIC POTASSIC MAGMAS OF CENTRAL-SOUTHERN ITALY	GEOCHEMISTRY GEOPHYSICS GEOSYSTEMS
CASALINI, M.; AVANZINELLI, R.; TOMMASINI, S.; ELLIOTT, T. R.; CONTICELLI, S.	2019	CE/MO AND MOLYBDENUM ISOTOPE SYSTEMATICS IN SUBDUCTION-RELATED OROGENIC POTASSIC MAGMAS OF CENTRAL-SOUTHERN ITALY	GEOCHEMISTRY GEOPHYSICS GEOSYSTEMS
CASALINI, M.; AVANZINELLI, R.; TOMMASINI, S.; ELLIOTT, T. R.; CONTICELLI, S.	2019	CE/MO AND MOLYBDENUM ISOTOPE SYSTEMATICS IN SUBDUCTION-RELATED OROGENIC POTASSIC MAGMAS OF CENTRAL-SOUTHERN ITALY	GEOCHEMISTRY GEOPHYSICS GEOSYSTEMS
CASALINI, M.; AVANZINELLI, R.; TOMMASINI, S.; ELLIOTT, T. R.; CONTICELLI, S.	2019	CE/MO AND MOLYBDENUM ISOTOPE SYSTEMATICS IN SUBDUCTION-RELATED OROGENIC POTASSIC MAGMAS OF CENTRAL-SOUTHERN ITALY	GEOCHEMISTRY GEOPHYSICS GEOSYSTEMS
CASALINI, M.; AVANZINELLI, R.; TOMMASINI, S.; ELLIOTT, T. R.; CONTICELLI, S.	2019	CE/MO AND MOLYBDENUM ISOTOPE SYSTEMATICS IN SUBDUCTION-RELATED OROGENIC POTASSIC MAGMAS OF CENTRAL-SOUTHERN ITALY	GEOCHEMISTRY GEOPHYSICS GEOSYSTEMS
CASALINI, M.; AVANZINELLI, R.; TOMMASINI, S.; ELLIOTT, T. R.; CONTICELLI, S.	2019	CE/MO AND MOLYBDENUM ISOTOPE SYSTEMATICS IN SUBDUCTION-RELATED OROGENIC POTASSIC MAGMAS OF CENTRAL-SOUTHERN ITALY	GEOCHEMISTRY GEOPHYSICS GEOSYSTEMS
CASALINI, M.; AVANZINELLI, R.; TOMMASINI, S.; ELLIOTT, T. R.; CONTICELLI, S.	2019	CE/MO AND MOLYBDENUM ISOTOPE SYSTEMATICS IN SUBDUCTION-RELATED OROGENIC POTASSIC MAGMAS OF CENTRAL-SOUTHERN ITALY	GEOCHEMISTRY GEOPHYSICS GEOSYSTEMS
CASALINI, M.; AVANZINELLI, R.; TOMMASINI, S.; ELLIOTT, T. R.; CONTICELLI, S.	2019	CE/MO AND MOLYBDENUM ISOTOPE SYSTEMATICS IN SUBDUCTION-RELATED OROGENIC POTASSIC MAGMAS OF CENTRAL-SOUTHERN ITALY	GEOCHEMISTRY GEOPHYSICS GEOSYSTEMS
CASALINI, M.; AVANZINELLI, R.; TOMMASINI, S.; ELLIOTT, T. R.; CONTICELLI, S.	2019	CE/MO AND MOLYBDENUM ISOTOPE SYSTEMATICS IN SUBDUCTION-RELATED OROGENIC POTASSIC MAGMAS OF CENTRAL-SOUTHERN ITALY	GEOCHEMISTRY GEOPHYSICS GEOSYSTEMS
CASALINI, M.; AVANZINELLI, R.; TOMMASINI, S.; ELLIOTT, T. R.; CONTICELLI, S.	2019	CE/MO AND MOLYBDENUM ISOTOPE SYSTEMATICS IN SUBDUCTION-RELATED OROGENIC POTASSIC MAGMAS OF CENTRAL-SOUTHERN ITALY	GEOCHEMISTRY GEOPHYSICS GEOSYSTEMS
CONTICELLI, S.; BORTOLOTTI, V.; PRINCIPI, G.; LAURENZI, M. A.; D^ANTONIO, M.; VAGGELLI, G.	2001	PETROLOGY, MINERALOGY AND GEOCHEMISTRY OF A MAFIC DIKE FROM MONTE CASTELLO, ELBA ISLAND, ITALY	OFIOLITI
CONTICELLI, S.; GUARNIERI, L.; FARINELLI, A.; MATTEI, M.; AVANZINELLI, R.; BIANCHINI, G.; BOARI, E.; TOMMASINI, S.; TIEPOLO, M.; PRELEVIC, D.; VENTURELLI, G.	2009	TRACE ELEMENTS AND SR-ND-PB ISOTOPES OF K-RICH, SHOSHONITIC, AND CALC-ALKALINE MAGMATISM OF THE WESTERN MEDITERRANEAN REGION: GENESIS OF ULTRAPOTASSIC TO CALC-ALKALINE MAGMATIC ASSOCIATIONS IN A POST-COLLISIONAL GEODYNAMIC SETTING	LITHOS
CONTICELLI, S.; GUARNIERI, L.; FARINELLI, A.; MATTEI, M.; AVANZINELLI, R.; BIANCHINI, G.; BOARI, E.; TOMMASINI, S.; TIEPOLO, M.; PRELEVIC, D.; VENTURELLI, G.	2009	TRACE ELEMENTS AND SR-ND-PB ISOTOPES OF K-RICH, SHOSHONITIC, AND CALC-ALKALINE MAGMATISM OF THE WESTERN MEDITERRANEAN REGION: GENESIS OF ULTRAPOTASSIC TO CALC-ALKALINE MAGMATIC ASSOCIATIONS IN A POST-COLLISIONAL GEODYNAMIC SETTING	LITHOS
CONTICELLI, S.; GUARNIERI, L.; FARINELLI, A.; MATTEI, M.; AVANZINELLI, R.; BIANCHINI, G.; BOARI, E.; TOMMASINI, S.; TIEPOLO, M.; PRELEVIC, D.; VENTURELLI, G.	2009	TRACE ELEMENTS AND SR-ND-PB ISOTOPES OF K-RICH, SHOSHONITIC, AND CALC-ALKALINE MAGMATISM OF THE WESTERN MEDITERRANEAN REGION: GENESIS OF ULTRAPOTASSIC TO CALC-ALKALINE MAGMATIC ASSOCIATIONS IN A POST-COLLISIONAL GEODYNAMIC SETTING	LITHOS
CONTICELLI, S.; GUARNIERI, L.; FARINELLI, A.; MATTEI, M.; AVANZINELLI, R.; BIANCHINI, G.; BOARI, E.; TOMMASINI, S.; TIEPOLO, M.; PRELEVIC, D.; VENTURELLI, G.	2009	TRACE ELEMENTS AND SR-ND-PB ISOTOPES OF K-RICH, SHOSHONITIC, AND CALC-ALKALINE MAGMATISM OF THE WESTERN MEDITERRANEAN REGION: GENESIS OF ULTRAPOTASSIC TO CALC-ALKALINE MAGMATIC ASSOCIATIONS IN A POST-COLLISIONAL GEODYNAMIC SETTING	LITHOS
DI BATTISTINI, G.; SAKAMOTO, M.; MONTANINI, A.; VENTURELLI, G.; TONARINI, S.	2001	PETROLOGY OF MELILITE-BEARING ROCKS FROM THE MONTEFIASCONE VOLCANIC COMPLEX (ROMAN MAGMATIC PROVINCE): NEW INSIGHTS INTO THE ULTRAPOTASSIC VOLCANISM OF CENTRAL ITALY	LITHOS
FOSU, B. R.; GHOSH, P. K.; VILADKAR, S. G.	2020	CLUMPED ISOTOPE GEOCHEMISTRY OF CARBONATITES IN THE NORTH-WESTERN DECCAN IGNEOUS PROVINCE: ASPECTS OF EVOLUTION, POST-DEPOSITIONAL ALTERATION AND MINERALISATION	GEOCHIM. COSMOCHIM. ACTA
HANDLEY, H. K.; BLICHERT-TOFT, J.; GERTISSER, R.; MACPHERSON, C. G.; TURNER, SIMON P.; ZAENNUDIN, A.; ABDURRACHMAN, M.	2014	INSIGHTS FROM PB AND O ISOTOPES INTO ALONG-ARC VARIATIONS IN SUBDUCTION INPUTS AND CRUSTAL ASSIMILATION FOR VOLCANIC ROCKS IN JAVA, SUNDA ARC, INDONESIA	GEOCHIM. COSMOCHIM. ACTA
HAUFF, F.; HOERNLE, K. A.; SCHMIDT, A.	2003	SR-ND-PB COMPOSITION OF MESOZOIC PACIFIC OCEANIC CRUST (SITE 1149 AND 801, ODP LEG 185): IMPLICATIONS FOR ALTERATION OF OCEAN CRUST AND THE INPUT INTO THE IZU-BONIN-MARIANA SUBDUCTION SYSTEM	GEOCHEMISTRY GEOPHYSICS GEOSYSTEMS
MELLUSO, L.; CONTICELLI, S.; D^ANTONIO, M.; MIRCO, N. P.; SACCANI, E.	2003	PETROLOGY AND MINERALOGY OF WOLLASTONITE- AND MELILITE-BEARING PARALAVAS FROM THE CENTRAL APENNINES, ITALY	AM. MINERAL.
MELLUSO, L.; CONTICELLI, S.; D^ANTONIO, M.; MIRCO, N. P.; SACCANI, E.	2003	PETROLOGY AND MINERALOGY OF WOLLASTONITE- AND MELILITE-BEARING PARALAVAS FROM THE CENTRAL APENNINES, ITALY	AM. MINERAL.
MELLUSO, L.; CONTICELLI, S.; D^ANTONIO, M.; MIRCO, N. P.; SACCANI, E.	2003	PETROLOGY AND MINERALOGY OF WOLLASTONITE- AND MELILITE-BEARING PARALAVAS FROM THE CENTRAL APENNINES, ITALY	AM. MINERAL.
MELLUSO, L.; CONTICELLI, S.; D^ANTONIO, M.; MIRCO, N. P.; SACCANI, E.	2003	PETROLOGY AND MINERALOGY OF WOLLASTONITE- AND MELILITE-BEARING PARALAVAS FROM THE CENTRAL APENNINES, ITALY	AM. MINERAL.
MELLUSO, L.; CONTICELLI, S.; D^ANTONIO, M.; MIRCO, N. P.; SACCANI, E.	2003	PETROLOGY AND MINERALOGY OF WOLLASTONITE- AND MELILITE-BEARING PARALAVAS FROM THE CENTRAL APENNINES, ITALY	AM. MINERAL.
MELLUSO, L.; CONTICELLI, S.; D^ANTONIO, M.; MIRCO, N. P.; SACCANI, E.	2003	PETROLOGY AND MINERALOGY OF WOLLASTONITE- AND MELILITE-BEARING PARALAVAS FROM THE CENTRAL APENNINES, ITALY	AM. MINERAL.
PLANK, T. A.; LANGMUIR, C. H.	1998	THE CHEMICAL COMPOSITION OF SUBDUCTING SEDIMENT AND ITS CONSEQUENCES FOR THE CRUST AND MANTLE	CHEM. GEOL.
STERN, R. J.; GWINN, C. J.	1990	ORIGIN OF LATE PRECAMBRIAN INTRUSIVE CARBONATES, EASTERN DESERT OF EGYPT AND SUDAN: C, O AND SR ISOTOPIC EVIDENCE	PREC. RESEARCH
THIRLWALL, M. F.; GRAHAM, A. M.; ARCULUS, R. J.; HARMON, R. S.; MACPHERSON, C. G.	1996	RESOLUTION OF THE EFFECT OF CRUSTAL ASSIMILATION, SEDIMENT SUBDUCTION, AND FLUID TRANSPORT IN ISLAND ARC MAGMAS: PB-SR-ND-O ISOTOPE GEOCHEMISTRY OF GRENADA, LESSER ANTILLES	GEOCHIM. COSMOCHIM. ACTA
THIRLWALL, M. F.; GRAHAM, A. M.; ARCULUS, R. J.; HARMON, R. S.; MACPHERSON, C. G.	1996	RESOLUTION OF THE EFFECT OF CRUSTAL ASSIMILATION, SEDIMENT SUBDUCTION, AND FLUID TRANSPORT IN ISLAND ARC MAGMAS: PB-SR-ND-O ISOTOPE GEOCHEMISTRY OF GRENADA, LESSER ANTILLES	GEOCHIM. COSMOCHIM. ACTA
USGS	2008	Geochemistry of rock samples from the National Geochemical Database: U.S. Geological Survey, Reston, VA.	U.S. Geological Survey
