# Supplementary material for: Basic chemical compositions combination rules and quantitative criterion of red beds
Source: Copernicus journal article supplement (doi:10.5194/egusphere-2023-2590), 2024-01-29
Supplement: Supplementary file 9 [file Supplementary Table 17-mudstone_EarthChem.xlsx]

## Sheet: Data
EarthChem Download: Wednesday, May. 10, 2023 8:12:40 am
Search Criteria:
Material	sedimentary
Rock Name	mudstone,mud
SAMPLE ID	IGSN	SOURCE	DOI	TITLE	JOURNAL	AUTHOR	CRUISEID	LATITUDE	LONGITUDE	LOC PREC	MIN AGE	AGE	MAX AGE	METHOD	MATERIAL	TYPE	COMPOSITION	ROCK NAME	MINERAL	SIO2	TIO2	AL2O3	CR2O3	FE2O3	FE2O3T	FEO	FEOT	MNO	MGO	CAO	NA2O	K2O	P2O5	BAO	LOI	H2O_M	H2O_P	SO3	V2O5	SI	FE	MN	NI	CO	CU	CD	ZN	AS	AG
s_20		NAVDAT		Nd and Sr isotopic characterization of the Wrangellia Terrane and implications for crustal growth of the Canadian Cordillera.	Journal of Geology. 98; 5, Pages 749-762. 1990.	Samson-Scott-D; Patchett-Jonathan-P; Gehrels-George-E; Anderson-Robert-G		48.8481	-123.617	0.01	315	350	385	TIMS_ID	SEDIMENTARY			MUDSTONE
s_20		NAVDAT		Nd and Sr isotopic characterization of the Wrangellia Terrane and implications for crustal growth of the Canadian Cordillera.	Journal of Geology. 98; 5, Pages 749-762. 1990.	Samson-Scott-D; Patchett-Jonathan-P; Gehrels-George-E; Anderson-Robert-G		48.8481	-123.617	0.01	315	350	385	TIMS	SEDIMENTARY			MUDSTONE
s_20		NAVDAT		Nd and Sr isotopic characterization of the Wrangellia Terrane and implications for crustal growth of the Canadian Cordillera.	Journal of Geology. 98; 5, Pages 749-762. 1990.	Samson-Scott-D; Patchett-Jonathan-P; Gehrels-George-E; Anderson-Robert-G		48.8481	-123.617	0.01	315	350	385	TIMS_ID	SEDIMENTARY			MUDSTONE
s_20		NAVDAT		Nd and Sr isotopic characterization of the Wrangellia Terrane and implications for crustal growth of the Canadian Cordillera.	Journal of Geology. 98; 5, Pages 749-762. 1990.	Samson-Scott-D; Patchett-Jonathan-P; Gehrels-George-E; Anderson-Robert-G		48.8481	-123.617	0.01	315	350	385	TIMS	SEDIMENTARY			MUDSTONE
s_22		NAVDAT		Nd and Sr isotopic characterization of the Wrangellia Terrane and implications for crustal growth of the Canadian Cordillera.	Journal of Geology. 98; 5, Pages 749-762. 1990.	Samson-Scott-D; Patchett-Jonathan-P; Gehrels-George-E; Anderson-Robert-G		49.3058	-124.206	0.01	315	350	385	TIMS_ID	SEDIMENTARY			MUDSTONE
s_22		NAVDAT		Nd and Sr isotopic characterization of the Wrangellia Terrane and implications for crustal growth of the Canadian Cordillera.	Journal of Geology. 98; 5, Pages 749-762. 1990.	Samson-Scott-D; Patchett-Jonathan-P; Gehrels-George-E; Anderson-Robert-G		49.3058	-124.206	0.01	315	350	385	TIMS	SEDIMENTARY			MUDSTONE
s_24		NAVDAT		Nd and Sr isotopic characterization of the Wrangellia Terrane and implications for crustal growth of the Canadian Cordillera.	Journal of Geology. 98; 5, Pages 749-762. 1990.	Samson-Scott-D; Patchett-Jonathan-P; Gehrels-George-E; Anderson-Robert-G		49.1714	-124.547	0.01	261	290	319	TIMS_ID	SEDIMENTARY			MUDSTONE
s_24		NAVDAT		Nd and Sr isotopic characterization of the Wrangellia Terrane and implications for crustal growth of the Canadian Cordillera.	Journal of Geology. 98; 5, Pages 749-762. 1990.	Samson-Scott-D; Patchett-Jonathan-P; Gehrels-George-E; Anderson-Robert-G		49.1714	-124.547	0.01	261	290	319	TIMS	SEDIMENTARY			MUDSTONE
s_25		NAVDAT		Nd and Sr isotopic characterization of the Wrangellia Terrane and implications for crustal growth of the Canadian Cordillera.	Journal of Geology. 98; 5, Pages 749-762. 1990.	Samson-Scott-D; Patchett-Jonathan-P; Gehrels-George-E; Anderson-Robert-G		49.1689	-124.548	0.01	261	290	319	TIMS_ID	SEDIMENTARY			MUDSTONE
s_25		NAVDAT		Nd and Sr isotopic characterization of the Wrangellia Terrane and implications for crustal growth of the Canadian Cordillera.	Journal of Geology. 98; 5, Pages 749-762. 1990.	Samson-Scott-D; Patchett-Jonathan-P; Gehrels-George-E; Anderson-Robert-G		49.1689	-124.548	0.01	261	290	319	TIMS	SEDIMENTARY			MUDSTONE
s_26		NAVDAT		Nd and Sr isotopic characterization of the Wrangellia Terrane and implications for crustal growth of the Canadian Cordillera.	Journal of Geology. 98; 5, Pages 749-762. 1990.	Samson-Scott-D; Patchett-Jonathan-P; Gehrels-George-E; Anderson-Robert-G		53.4106	-132.307	0.01	180	200	220	TIMS_ID	SEDIMENTARY			MUDSTONE
s_26		NAVDAT		Nd and Sr isotopic characterization of the Wrangellia Terrane and implications for crustal growth of the Canadian Cordillera.	Journal of Geology. 98; 5, Pages 749-762. 1990.	Samson-Scott-D; Patchett-Jonathan-P; Gehrels-George-E; Anderson-Robert-G		53.4106	-132.307	0.01	180	200	220	TIMS	SEDIMENTARY			MUDSTONE
s_30		NAVDAT		Nd and Sr isotopic characterization of the Wrangellia Terrane and implications for crustal growth of the Canadian Cordillera.	Journal of Geology. 98; 5, Pages 749-762. 1990.	Samson-Scott-D; Patchett-Jonathan-P; Gehrels-George-E; Anderson-Robert-G		53.2533	-132.118	0.01	81	90	99	TIMS_ID	SEDIMENTARY			MUDSTONE
s_30		NAVDAT		Nd and Sr isotopic characterization of the Wrangellia Terrane and implications for crustal growth of the Canadian Cordillera.	Journal of Geology. 98; 5, Pages 749-762. 1990.	Samson-Scott-D; Patchett-Jonathan-P; Gehrels-George-E; Anderson-Robert-G		53.2533	-132.118	0.01	81	90	99	TIMS	SEDIMENTARY			MUDSTONE
s_31		NAVDAT		Nd and Sr isotopic characterization of the Wrangellia Terrane and implications for crustal growth of the Canadian Cordillera.	Journal of Geology. 98; 5, Pages 749-762. 1990.	Samson-Scott-D; Patchett-Jonathan-P; Gehrels-George-E; Anderson-Robert-G		53.2411	-132.2	0.01	81	90	99	TIMS_ID	SEDIMENTARY			MUDSTONE
s_31		NAVDAT		Nd and Sr isotopic characterization of the Wrangellia Terrane and implications for crustal growth of the Canadian Cordillera.	Journal of Geology. 98; 5, Pages 749-762. 1990.	Samson-Scott-D; Patchett-Jonathan-P; Gehrels-George-E; Anderson-Robert-G		53.2411	-132.2	0.01	81	90	99	TIMS	SEDIMENTARY			MUDSTONE
125-779A-05R-3,054-056		GEOROC	10.1016/S0012-821X(01)00286-2	BORON ISOTOPE SYSTEMATICS OF SLAB FLUIDS AS INFERRED FROM A SERPENTINE SEAMOUNT, MARIANA FOREARC	EARTH PLANET. SCI. LETT.	BENTON, L. D.; RYAN, J. G.; TERA, F.		19.5125	146.696	0.0001				TIMS	SEDIMENTARY			MUD
125-779A-05R-3,054-056		GEOROC	10.1016/S0012-821X(01)00286-2	BORON ISOTOPE SYSTEMATICS OF SLAB FLUIDS AS INFERRED FROM A SERPENTINE SEAMOUNT, MARIANA FOREARC	EARTH PLANET. SCI. LETT.	BENTON, L. D.; RYAN, J. G.; TERA, F.		19.5125	146.696	0.0001				TIMS_ID	SEDIMENTARY			MUD
125-779A-05R-3,054-056		GEOROC	10.1029/2004GC000708	LITHIUM ABUNDANCE AND ISOTOPE SYSTEMATICS OF FOREARC SERPENTINITES, CONICAL SEAMOUNT, MARIANA FOREARC: INSIGHTS INTO THE MECHANICS OF SLAB-MANTLE EXCHANGE DURING SUBDUCTION	GEOCHEMISTRY GEOPHYSICS GEOSYSTEMS	BENTON, L. D.; RYAN, J. G.; SAVOV, I. P.		19.5125	146.696	0.0001				ICPMS	SEDIMENTARY			MUD
125-779A-05R-3,054-056		GEOROC	10.1029/2004GC000708	LITHIUM ABUNDANCE AND ISOTOPE SYSTEMATICS OF FOREARC SERPENTINITES, CONICAL SEAMOUNT, MARIANA FOREARC: INSIGHTS INTO THE MECHANICS OF SLAB-MANTLE EXCHANGE DURING SUBDUCTION	GEOCHEMISTRY GEOPHYSICS GEOSYSTEMS	BENTON, L. D.; RYAN, J. G.; SAVOV, I. P.		19.5125	146.696	0.0001				DCPAES/MS_ID	SEDIMENTARY			MUD
125-779A-13R-1,138-140		GEOROC	10.1016/S0012-821X(01)00286-2	BORON ISOTOPE SYSTEMATICS OF SLAB FLUIDS AS INFERRED FROM A SERPENTINE SEAMOUNT, MARIANA FOREARC	EARTH PLANET. SCI. LETT.	BENTON, L. D.; RYAN, J. G.; TERA, F.		19.5125	146.696	0.0001				TIMS	SEDIMENTARY			MUD
125-779A-13R-1,138-140		GEOROC	10.1016/S0012-821X(01)00286-2	BORON ISOTOPE SYSTEMATICS OF SLAB FLUIDS AS INFERRED FROM A SERPENTINE SEAMOUNT, MARIANA FOREARC	EARTH PLANET. SCI. LETT.	BENTON, L. D.; RYAN, J. G.; TERA, F.		19.5125	146.696	0.0001				TIMS_ID	SEDIMENTARY			MUD
125-779A-13R-1,138-140		GEOROC	10.1029/2004GC000708	LITHIUM ABUNDANCE AND ISOTOPE SYSTEMATICS OF FOREARC SERPENTINITES, CONICAL SEAMOUNT, MARIANA FOREARC: INSIGHTS INTO THE MECHANICS OF SLAB-MANTLE EXCHANGE DURING SUBDUCTION	GEOCHEMISTRY GEOPHYSICS GEOSYSTEMS	BENTON, L. D.; RYAN, J. G.; SAVOV, I. P.		19.5125	146.696	0.0001				DCPAES/MS_ID	SEDIMENTARY			MUD
125-779A-18R-2,087-089		GEOROC	10.1016/S0012-821X(01)00286-2	BORON ISOTOPE SYSTEMATICS OF SLAB FLUIDS AS INFERRED FROM A SERPENTINE SEAMOUNT, MARIANA FOREARC	EARTH PLANET. SCI. LETT.	BENTON, L. D.; RYAN, J. G.; TERA, F.		19.5125	146.696	0.0001				TIMS_ID	SEDIMENTARY			MUD
125-779A-18R-2,087-089		GEOROC	10.1029/2004GC000708	LITHIUM ABUNDANCE AND ISOTOPE SYSTEMATICS OF FOREARC SERPENTINITES, CONICAL SEAMOUNT, MARIANA FOREARC: INSIGHTS INTO THE MECHANICS OF SLAB-MANTLE EXCHANGE DURING SUBDUCTION	GEOCHEMISTRY GEOPHYSICS GEOSYSTEMS	BENTON, L. D.; RYAN, J. G.; SAVOV, I. P.		19.5125	146.696	0.0001				ICPMS	SEDIMENTARY			MUD
125-779A-18R-2,087-089		GEOROC	10.1029/2004GC000708	LITHIUM ABUNDANCE AND ISOTOPE SYSTEMATICS OF FOREARC SERPENTINITES, CONICAL SEAMOUNT, MARIANA FOREARC: INSIGHTS INTO THE MECHANICS OF SLAB-MANTLE EXCHANGE DURING SUBDUCTION	GEOCHEMISTRY GEOPHYSICS GEOSYSTEMS	BENTON, L. D.; RYAN, J. G.; SAVOV, I. P.		19.5125	146.696	0.0001				DCPAES/MS_ID	SEDIMENTARY			MUD
125-779A-28R-2,112-114		GEOROC	10.1016/S0012-821X(01)00286-2	BORON ISOTOPE SYSTEMATICS OF SLAB FLUIDS AS INFERRED FROM A SERPENTINE SEAMOUNT, MARIANA FOREARC	EARTH PLANET. SCI. LETT.	BENTON, L. D.; RYAN, J. G.; TERA, F.		19.5125	146.696	0.0001				TIMS	SEDIMENTARY			MUD
125-779A-28R-2,112-114		GEOROC	10.1016/S0012-821X(01)00286-2	BORON ISOTOPE SYSTEMATICS OF SLAB FLUIDS AS INFERRED FROM A SERPENTINE SEAMOUNT, MARIANA FOREARC	EARTH PLANET. SCI. LETT.	BENTON, L. D.; RYAN, J. G.; TERA, F.		19.5125	146.696	0.0001				TIMS_ID	SEDIMENTARY			MUD
125-779A-28R-2,112-114		GEOROC	10.1029/2004GC000708	LITHIUM ABUNDANCE AND ISOTOPE SYSTEMATICS OF FOREARC SERPENTINITES, CONICAL SEAMOUNT, MARIANA FOREARC: INSIGHTS INTO THE MECHANICS OF SLAB-MANTLE EXCHANGE DURING SUBDUCTION	GEOCHEMISTRY GEOPHYSICS GEOSYSTEMS	BENTON, L. D.; RYAN, J. G.; SAVOV, I. P.		19.5125	146.696	0.0001				DCPAES/MS_ID	SEDIMENTARY			MUD
125-779A-32R-2,000-010		GEOROC	10.1016/S0012-821X(01)00286-2	BORON ISOTOPE SYSTEMATICS OF SLAB FLUIDS AS INFERRED FROM A SERPENTINE SEAMOUNT, MARIANA FOREARC	EARTH PLANET. SCI. LETT.	BENTON, L. D.; RYAN, J. G.; TERA, F.		19.5125	146.696	0.0001				TIMS_ID	SEDIMENTARY			MUD
125-779A-32R-2,000-010		GEOROC	10.1029/2004GC000708	LITHIUM ABUNDANCE AND ISOTOPE SYSTEMATICS OF FOREARC SERPENTINITES, CONICAL SEAMOUNT, MARIANA FOREARC: INSIGHTS INTO THE MECHANICS OF SLAB-MANTLE EXCHANGE DURING SUBDUCTION	GEOCHEMISTRY GEOPHYSICS GEOSYSTEMS	BENTON, L. D.; RYAN, J. G.; SAVOV, I. P.		19.5125	146.696	0.0001				DCPAES/MS_ID	SEDIMENTARY			MUD
125-779A-36R-2,132-134		GEOROC	10.1016/S0012-821X(01)00286-2	BORON ISOTOPE SYSTEMATICS OF SLAB FLUIDS AS INFERRED FROM A SERPENTINE SEAMOUNT, MARIANA FOREARC	EARTH PLANET. SCI. LETT.	BENTON, L. D.; RYAN, J. G.; TERA, F.		19.5125	146.696	0.0001				TIMS	SEDIMENTARY			MUD
125-779A-36R-2,132-134		GEOROC	10.1016/S0012-821X(01)00286-2	BORON ISOTOPE SYSTEMATICS OF SLAB FLUIDS AS INFERRED FROM A SERPENTINE SEAMOUNT, MARIANA FOREARC	EARTH PLANET. SCI. LETT.	BENTON, L. D.; RYAN, J. G.; TERA, F.		19.5125	146.696	0.0001				TIMS_ID	SEDIMENTARY			MUD
125-779A-36R-2,132-134		GEOROC	10.1029/2004GC000708	LITHIUM ABUNDANCE AND ISOTOPE SYSTEMATICS OF FOREARC SERPENTINITES, CONICAL SEAMOUNT, MARIANA FOREARC: INSIGHTS INTO THE MECHANICS OF SLAB-MANTLE EXCHANGE DURING SUBDUCTION	GEOCHEMISTRY GEOPHYSICS GEOSYSTEMS	BENTON, L. D.; RYAN, J. G.; SAVOV, I. P.		19.5125	146.696	0.0001				ICPMS	SEDIMENTARY			MUD
125-779A-36R-2,132-134		GEOROC	10.1029/2004GC000708	LITHIUM ABUNDANCE AND ISOTOPE SYSTEMATICS OF FOREARC SERPENTINITES, CONICAL SEAMOUNT, MARIANA FOREARC: INSIGHTS INTO THE MECHANICS OF SLAB-MANTLE EXCHANGE DURING SUBDUCTION	GEOCHEMISTRY GEOPHYSICS GEOSYSTEMS	BENTON, L. D.; RYAN, J. G.; SAVOV, I. P.		19.5125	146.696	0.0001				DCPAES/MS_ID	SEDIMENTARY			MUD
125-779B-01R-1,117-119		GEOROC	10.1016/S0012-821X(01)00286-2	BORON ISOTOPE SYSTEMATICS OF SLAB FLUIDS AS INFERRED FROM A SERPENTINE SEAMOUNT, MARIANA FOREARC	EARTH PLANET. SCI. LETT.	BENTON, L. D.; RYAN, J. G.; TERA, F.		19.5125	146.696	0.0001				TIMS_ID	SEDIMENTARY			MUD
125-779B-01R-1,117-119		GEOROC	10.1029/2004GC000708	LITHIUM ABUNDANCE AND ISOTOPE SYSTEMATICS OF FOREARC SERPENTINITES, CONICAL SEAMOUNT, MARIANA FOREARC: INSIGHTS INTO THE MECHANICS OF SLAB-MANTLE EXCHANGE DURING SUBDUCTION	GEOCHEMISTRY GEOPHYSICS GEOSYSTEMS	BENTON, L. D.; RYAN, J. G.; SAVOV, I. P.		19.5125	146.696	0.0001				ICPMS	SEDIMENTARY			MUD
125-779B-01R-1,117-119		GEOROC	10.1029/2004GC000708	LITHIUM ABUNDANCE AND ISOTOPE SYSTEMATICS OF FOREARC SERPENTINITES, CONICAL SEAMOUNT, MARIANA FOREARC: INSIGHTS INTO THE MECHANICS OF SLAB-MANTLE EXCHANGE DURING SUBDUCTION	GEOCHEMISTRY GEOPHYSICS GEOSYSTEMS	BENTON, L. D.; RYAN, J. G.; SAVOV, I. P.		19.5125	146.696	0.0001				DCPAES/MS_ID	SEDIMENTARY			MUD
125-780C-02R-1,002-004		GEOROC	10.1016/S0012-821X(01)00286-2	BORON ISOTOPE SYSTEMATICS OF SLAB FLUIDS AS INFERRED FROM A SERPENTINE SEAMOUNT, MARIANA FOREARC	EARTH PLANET. SCI. LETT.	BENTON, L. D.; RYAN, J. G.; TERA, F.		19.5422	146.654	0.0001				TIMS	SEDIMENTARY			MUD
125-780C-02R-1,002-004		GEOROC	10.1016/S0012-821X(01)00286-2	BORON ISOTOPE SYSTEMATICS OF SLAB FLUIDS AS INFERRED FROM A SERPENTINE SEAMOUNT, MARIANA FOREARC	EARTH PLANET. SCI. LETT.	BENTON, L. D.; RYAN, J. G.; TERA, F.		19.5422	146.654	0.0001				TIMS_ID	SEDIMENTARY			MUD
125-780C-02R-1,002-004		GEOROC	10.1029/2004GC000708	LITHIUM ABUNDANCE AND ISOTOPE SYSTEMATICS OF FOREARC SERPENTINITES, CONICAL SEAMOUNT, MARIANA FOREARC: INSIGHTS INTO THE MECHANICS OF SLAB-MANTLE EXCHANGE DURING SUBDUCTION	GEOCHEMISTRY GEOPHYSICS GEOSYSTEMS	BENTON, L. D.; RYAN, J. G.; SAVOV, I. P.		19.5422	146.654	0.0001				ICPMS	SEDIMENTARY			MUD
125-780C-02R-1,002-004		GEOROC	10.1029/2004GC000708	LITHIUM ABUNDANCE AND ISOTOPE SYSTEMATICS OF FOREARC SERPENTINITES, CONICAL SEAMOUNT, MARIANA FOREARC: INSIGHTS INTO THE MECHANICS OF SLAB-MANTLE EXCHANGE DURING SUBDUCTION	GEOCHEMISTRY GEOPHYSICS GEOSYSTEMS	BENTON, L. D.; RYAN, J. G.; SAVOV, I. P.		19.5422	146.654	0.0001				DCPAES/MS_ID	SEDIMENTARY			MUD
125-780C-04R-1,024-026		GEOROC	10.1016/S0012-821X(01)00286-2	BORON ISOTOPE SYSTEMATICS OF SLAB FLUIDS AS INFERRED FROM A SERPENTINE SEAMOUNT, MARIANA FOREARC	EARTH PLANET. SCI. LETT.	BENTON, L. D.; RYAN, J. G.; TERA, F.		19.5422	146.654	0.0001				TIMS_ID	SEDIMENTARY			MUD
125-780C-04R-1,024-026		GEOROC	10.1029/2004GC000708	LITHIUM ABUNDANCE AND ISOTOPE SYSTEMATICS OF FOREARC SERPENTINITES, CONICAL SEAMOUNT, MARIANA FOREARC: INSIGHTS INTO THE MECHANICS OF SLAB-MANTLE EXCHANGE DURING SUBDUCTION	GEOCHEMISTRY GEOPHYSICS GEOSYSTEMS	BENTON, L. D.; RYAN, J. G.; SAVOV, I. P.		19.5422	146.654	0.0001				ICPMS	SEDIMENTARY			MUD
125-780C-04R-1,024-026		GEOROC	10.1029/2004GC000708	LITHIUM ABUNDANCE AND ISOTOPE SYSTEMATICS OF FOREARC SERPENTINITES, CONICAL SEAMOUNT, MARIANA FOREARC: INSIGHTS INTO THE MECHANICS OF SLAB-MANTLE EXCHANGE DURING SUBDUCTION	GEOCHEMISTRY GEOPHYSICS GEOSYSTEMS	BENTON, L. D.; RYAN, J. G.; SAVOV, I. P.		19.5422	146.654	0.0001				DCPAES/MS_ID	SEDIMENTARY			MUD
125-780C-05R-1,037-039		GEOROC	10.1016/S0012-821X(01)00286-2	BORON ISOTOPE SYSTEMATICS OF SLAB FLUIDS AS INFERRED FROM A SERPENTINE SEAMOUNT, MARIANA FOREARC	EARTH PLANET. SCI. LETT.	BENTON, L. D.; RYAN, J. G.; TERA, F.		19.5422	146.654	0.0001				TIMS	SEDIMENTARY			MUD
125-780C-05R-1,037-039		GEOROC	10.1016/S0012-821X(01)00286-2	BORON ISOTOPE SYSTEMATICS OF SLAB FLUIDS AS INFERRED FROM A SERPENTINE SEAMOUNT, MARIANA FOREARC	EARTH PLANET. SCI. LETT.	BENTON, L. D.; RYAN, J. G.; TERA, F.		19.5422	146.654	0.0001				TIMS_ID	SEDIMENTARY			MUD
125-780C-05R-1,037-039		GEOROC	10.1016/S0012-821X(01)00286-2	BORON ISOTOPE SYSTEMATICS OF SLAB FLUIDS AS INFERRED FROM A SERPENTINE SEAMOUNT, MARIANA FOREARC	EARTH PLANET. SCI. LETT.	BENTON, L. D.; RYAN, J. G.; TERA, F.		19.5422	146.654	0.0001				TIMS	SEDIMENTARY			MUD
125-780C-05R-1,037-039		GEOROC	10.1029/2004GC000708	LITHIUM ABUNDANCE AND ISOTOPE SYSTEMATICS OF FOREARC SERPENTINITES, CONICAL SEAMOUNT, MARIANA FOREARC: INSIGHTS INTO THE MECHANICS OF SLAB-MANTLE EXCHANGE DURING SUBDUCTION	GEOCHEMISTRY GEOPHYSICS GEOSYSTEMS	BENTON, L. D.; RYAN, J. G.; SAVOV, I. P.		19.5422	146.654	0.0001				ICPMS	SEDIMENTARY			MUD
125-780C-05R-1,037-039		GEOROC	10.1029/2004GC000708	LITHIUM ABUNDANCE AND ISOTOPE SYSTEMATICS OF FOREARC SERPENTINITES, CONICAL SEAMOUNT, MARIANA FOREARC: INSIGHTS INTO THE MECHANICS OF SLAB-MANTLE EXCHANGE DURING SUBDUCTION	GEOCHEMISTRY GEOPHYSICS GEOSYSTEMS	BENTON, L. D.; RYAN, J. G.; SAVOV, I. P.		19.5422	146.654	0.0001				DCPAES/MS_ID	SEDIMENTARY			MUD
125-780C-07R-1,014-017		GEOROC	10.1016/S0012-821X(01)00286-2	BORON ISOTOPE SYSTEMATICS OF SLAB FLUIDS AS INFERRED FROM A SERPENTINE SEAMOUNT, MARIANA FOREARC	EARTH PLANET. SCI. LETT.	BENTON, L. D.; RYAN, J. G.; TERA, F.		19.5422	146.654	0.0001				TIMS	SEDIMENTARY			MUD
125-780C-07R-1,014-017		GEOROC	10.1016/S0012-821X(01)00286-2	BORON ISOTOPE SYSTEMATICS OF SLAB FLUIDS AS INFERRED FROM A SERPENTINE SEAMOUNT, MARIANA FOREARC	EARTH PLANET. SCI. LETT.	BENTON, L. D.; RYAN, J. G.; TERA, F.		19.5422	146.654	0.0001				TIMS_ID	SEDIMENTARY			MUD
125-780C-07R-1,014-017		GEOROC	10.1029/2004GC000708	LITHIUM ABUNDANCE AND ISOTOPE SYSTEMATICS OF FOREARC SERPENTINITES, CONICAL SEAMOUNT, MARIANA FOREARC: INSIGHTS INTO THE MECHANICS OF SLAB-MANTLE EXCHANGE DURING SUBDUCTION	GEOCHEMISTRY GEOPHYSICS GEOSYSTEMS	BENTON, L. D.; RYAN, J. G.; SAVOV, I. P.		19.5422	146.654	0.0001				ICPMS	SEDIMENTARY			MUD
125-780C-07R-1,014-017		GEOROC	10.1029/2004GC000708	LITHIUM ABUNDANCE AND ISOTOPE SYSTEMATICS OF FOREARC SERPENTINITES, CONICAL SEAMOUNT, MARIANA FOREARC: INSIGHTS INTO THE MECHANICS OF SLAB-MANTLE EXCHANGE DURING SUBDUCTION	GEOCHEMISTRY GEOPHYSICS GEOSYSTEMS	BENTON, L. D.; RYAN, J. G.; SAVOV, I. P.		19.5422	146.654	0.0001				DCPAES/MS_ID	SEDIMENTARY			MUD
125-780C-12R-1,006-008		GEOROC	10.1016/S0012-821X(01)00286-2	BORON ISOTOPE SYSTEMATICS OF SLAB FLUIDS AS INFERRED FROM A SERPENTINE SEAMOUNT, MARIANA FOREARC	EARTH PLANET. SCI. LETT.	BENTON, L. D.; RYAN, J. G.; TERA, F.		19.5422	146.654	0.0001				TIMS_ID	SEDIMENTARY			MUD
125-780C-12R-1,006-008		GEOROC	10.1029/2004GC000708	LITHIUM ABUNDANCE AND ISOTOPE SYSTEMATICS OF FOREARC SERPENTINITES, CONICAL SEAMOUNT, MARIANA FOREARC: INSIGHTS INTO THE MECHANICS OF SLAB-MANTLE EXCHANGE DURING SUBDUCTION	GEOCHEMISTRY GEOPHYSICS GEOSYSTEMS	BENTON, L. D.; RYAN, J. G.; SAVOV, I. P.		19.5422	146.654	0.0001				ICPMS	SEDIMENTARY			MUD
125-780C-12R-1,006-008		GEOROC	10.1029/2004GC000708	LITHIUM ABUNDANCE AND ISOTOPE SYSTEMATICS OF FOREARC SERPENTINITES, CONICAL SEAMOUNT, MARIANA FOREARC: INSIGHTS INTO THE MECHANICS OF SLAB-MANTLE EXCHANGE DURING SUBDUCTION	GEOCHEMISTRY GEOPHYSICS GEOSYSTEMS	BENTON, L. D.; RYAN, J. G.; SAVOV, I. P.		19.5422	146.654	0.0001				DCPAES/MS_ID	SEDIMENTARY			MUD
125-780C-13R-1,053-055		GEOROC	10.1016/S0012-821X(01)00286-2	BORON ISOTOPE SYSTEMATICS OF SLAB FLUIDS AS INFERRED FROM A SERPENTINE SEAMOUNT, MARIANA FOREARC	EARTH PLANET. SCI. LETT.	BENTON, L. D.; RYAN, J. G.; TERA, F.		19.5422	146.654	0.0001				TIMS	SEDIMENTARY			MUD
125-780C-13R-1,053-055		GEOROC	10.1016/S0012-821X(01)00286-2	BORON ISOTOPE SYSTEMATICS OF SLAB FLUIDS AS INFERRED FROM A SERPENTINE SEAMOUNT, MARIANA FOREARC	EARTH PLANET. SCI. LETT.	BENTON, L. D.; RYAN, J. G.; TERA, F.		19.5422	146.654	0.0001				TIMS_ID	SEDIMENTARY			MUD
125-780C-13R-1,053-055		GEOROC	10.1029/2004GC000708	LITHIUM ABUNDANCE AND ISOTOPE SYSTEMATICS OF FOREARC SERPENTINITES, CONICAL SEAMOUNT, MARIANA FOREARC: INSIGHTS INTO THE MECHANICS OF SLAB-MANTLE EXCHANGE DURING SUBDUCTION	GEOCHEMISTRY GEOPHYSICS GEOSYSTEMS	BENTON, L. D.; RYAN, J. G.; SAVOV, I. P.		19.5422	146.654	0.0001				ICPMS	SEDIMENTARY			MUD
125-780C-13R-1,053-055		GEOROC	10.1029/2004GC000708	LITHIUM ABUNDANCE AND ISOTOPE SYSTEMATICS OF FOREARC SERPENTINITES, CONICAL SEAMOUNT, MARIANA FOREARC: INSIGHTS INTO THE MECHANICS OF SLAB-MANTLE EXCHANGE DURING SUBDUCTION	GEOCHEMISTRY GEOPHYSICS GEOSYSTEMS	BENTON, L. D.; RYAN, J. G.; SAVOV, I. P.		19.5422	146.654	0.0001				DCPAES/MS_ID	SEDIMENTARY			MUD
125-780C-15R-1,027-029		GEOROC	10.1016/S0012-821X(01)00286-2	BORON ISOTOPE SYSTEMATICS OF SLAB FLUIDS AS INFERRED FROM A SERPENTINE SEAMOUNT, MARIANA FOREARC	EARTH PLANET. SCI. LETT.	BENTON, L. D.; RYAN, J. G.; TERA, F.		19.5422	146.654	0.0001				TIMS	SEDIMENTARY			MUD
125-780C-15R-1,027-029		GEOROC	10.1016/S0012-821X(01)00286-2	BORON ISOTOPE SYSTEMATICS OF SLAB FLUIDS AS INFERRED FROM A SERPENTINE SEAMOUNT, MARIANA FOREARC	EARTH PLANET. SCI. LETT.	BENTON, L. D.; RYAN, J. G.; TERA, F.		19.5422	146.654	0.0001				TIMS	SEDIMENTARY			MUD
125-780C-15R-1,027-029		GEOROC	10.1016/S0012-821X(01)00286-2	BORON ISOTOPE SYSTEMATICS OF SLAB FLUIDS AS INFERRED FROM A SERPENTINE SEAMOUNT, MARIANA FOREARC	EARTH PLANET. SCI. LETT.	BENTON, L. D.; RYAN, J. G.; TERA, F.		19.5422	146.654	0.0001				TIMS_ID	SEDIMENTARY			MUD
125-780C-15R-1,027-029		GEOROC	10.1029/2004GC000708	LITHIUM ABUNDANCE AND ISOTOPE SYSTEMATICS OF FOREARC SERPENTINITES, CONICAL SEAMOUNT, MARIANA FOREARC: INSIGHTS INTO THE MECHANICS OF SLAB-MANTLE EXCHANGE DURING SUBDUCTION	GEOCHEMISTRY GEOPHYSICS GEOSYSTEMS	BENTON, L. D.; RYAN, J. G.; SAVOV, I. P.		19.5422	146.654	0.0001				DCPAES/MS_ID	SEDIMENTARY			MUD
125-780C-15R-1,027-029		GEOROC	10.1029/2004GC000708	LITHIUM ABUNDANCE AND ISOTOPE SYSTEMATICS OF FOREARC SERPENTINITES, CONICAL SEAMOUNT, MARIANA FOREARC: INSIGHTS INTO THE MECHANICS OF SLAB-MANTLE EXCHANGE DURING SUBDUCTION	GEOCHEMISTRY GEOPHYSICS GEOSYSTEMS	BENTON, L. D.; RYAN, J. G.; SAVOV, I. P.		19.5422	146.654	0.0001				ICPMS	SEDIMENTARY			MUD
125-780C-16R-1,033-035		GEOROC	10.1016/S0012-821X(01)00286-2	BORON ISOTOPE SYSTEMATICS OF SLAB FLUIDS AS INFERRED FROM A SERPENTINE SEAMOUNT, MARIANA FOREARC	EARTH PLANET. SCI. LETT.	BENTON, L. D.; RYAN, J. G.; TERA, F.		19.5422	146.654	0.0001				TIMS_ID	SEDIMENTARY			MUD
125-780C-16R-1,033-035		GEOROC	10.1029/2004GC000708	LITHIUM ABUNDANCE AND ISOTOPE SYSTEMATICS OF FOREARC SERPENTINITES, CONICAL SEAMOUNT, MARIANA FOREARC: INSIGHTS INTO THE MECHANICS OF SLAB-MANTLE EXCHANGE DURING SUBDUCTION	GEOCHEMISTRY GEOPHYSICS GEOSYSTEMS	BENTON, L. D.; RYAN, J. G.; SAVOV, I. P.		19.5422	146.654	0.0001				ICPMS	SEDIMENTARY			MUD
125-780C-16R-1,033-035		GEOROC	10.1029/2004GC000708	LITHIUM ABUNDANCE AND ISOTOPE SYSTEMATICS OF FOREARC SERPENTINITES, CONICAL SEAMOUNT, MARIANA FOREARC: INSIGHTS INTO THE MECHANICS OF SLAB-MANTLE EXCHANGE DURING SUBDUCTION	GEOCHEMISTRY GEOPHYSICS GEOSYSTEMS	BENTON, L. D.; RYAN, J. G.; SAVOV, I. P.		19.5422	146.654	0.0001				DCPAES/MS_ID	SEDIMENTARY			MUD
125-780C-18R-1,129-131		GEOROC	10.1016/S0012-821X(01)00286-2	BORON ISOTOPE SYSTEMATICS OF SLAB FLUIDS AS INFERRED FROM A SERPENTINE SEAMOUNT, MARIANA FOREARC	EARTH PLANET. SCI. LETT.	BENTON, L. D.; RYAN, J. G.; TERA, F.		19.5422	146.654	0.0001				TIMS_ID	SEDIMENTARY			MUD
125-780C-18R-1,129-131		GEOROC	10.1029/2004GC000708	LITHIUM ABUNDANCE AND ISOTOPE SYSTEMATICS OF FOREARC SERPENTINITES, CONICAL SEAMOUNT, MARIANA FOREARC: INSIGHTS INTO THE MECHANICS OF SLAB-MANTLE EXCHANGE DURING SUBDUCTION	GEOCHEMISTRY GEOPHYSICS GEOSYSTEMS	BENTON, L. D.; RYAN, J. G.; SAVOV, I. P.		19.5422	146.654	0.0001				ICPMS	SEDIMENTARY			MUD
125-780C-18R-1,129-131		GEOROC	10.1029/2004GC000708	LITHIUM ABUNDANCE AND ISOTOPE SYSTEMATICS OF FOREARC SERPENTINITES, CONICAL SEAMOUNT, MARIANA FOREARC: INSIGHTS INTO THE MECHANICS OF SLAB-MANTLE EXCHANGE DURING SUBDUCTION	GEOCHEMISTRY GEOPHYSICS GEOSYSTEMS	BENTON, L. D.; RYAN, J. G.; SAVOV, I. P.		19.5422	146.654	0.0001				DCPAES/MS_ID	SEDIMENTARY			MUD
125-780C-18R-1,138-140		GEOROC	10.1016/S0012-821X(01)00286-2	BORON ISOTOPE SYSTEMATICS OF SLAB FLUIDS AS INFERRED FROM A SERPENTINE SEAMOUNT, MARIANA FOREARC	EARTH PLANET. SCI. LETT.	BENTON, L. D.; RYAN, J. G.; TERA, F.		19.5422	146.654	0.0001				TIMS_ID	SEDIMENTARY			MUD
125-780C-18R-1,138-140		GEOROC	10.1016/S0012-821X(01)00286-2	BORON ISOTOPE SYSTEMATICS OF SLAB FLUIDS AS INFERRED FROM A SERPENTINE SEAMOUNT, MARIANA FOREARC	EARTH PLANET. SCI. LETT.	BENTON, L. D.; RYAN, J. G.; TERA, F.		19.5422	146.654	0.0001				TIMS	SEDIMENTARY			MUD
125-780C-18R-1,138-140		GEOROC	10.1029/2004GC000708	LITHIUM ABUNDANCE AND ISOTOPE SYSTEMATICS OF FOREARC SERPENTINITES, CONICAL SEAMOUNT, MARIANA FOREARC: INSIGHTS INTO THE MECHANICS OF SLAB-MANTLE EXCHANGE DURING SUBDUCTION	GEOCHEMISTRY GEOPHYSICS GEOSYSTEMS	BENTON, L. D.; RYAN, J. G.; SAVOV, I. P.		19.5422	146.654	0.0001				ICPMS	SEDIMENTARY			MUD
125-780C-18R-1,138-140		GEOROC	10.1029/2004GC000708	LITHIUM ABUNDANCE AND ISOTOPE SYSTEMATICS OF FOREARC SERPENTINITES, CONICAL SEAMOUNT, MARIANA FOREARC: INSIGHTS INTO THE MECHANICS OF SLAB-MANTLE EXCHANGE DURING SUBDUCTION	GEOCHEMISTRY GEOPHYSICS GEOSYSTEMS	BENTON, L. D.; RYAN, J. G.; SAVOV, I. P.		19.5422	146.654	0.0001				DCPAES/MS_ID	SEDIMENTARY			MUD
125-780C-18R-1,138-140		GEOROC	10.1029/2004GC000708	LITHIUM ABUNDANCE AND ISOTOPE SYSTEMATICS OF FOREARC SERPENTINITES, CONICAL SEAMOUNT, MARIANA FOREARC: INSIGHTS INTO THE MECHANICS OF SLAB-MANTLE EXCHANGE DURING SUBDUCTION	GEOCHEMISTRY GEOPHYSICS GEOSYSTEMS	BENTON, L. D.; RYAN, J. G.; SAVOV, I. P.		19.5422	146.654	0.0001				ICPMS	SEDIMENTARY			MUD
125-780D-01X-1,026-028		GEOROC	10.1016/S0012-821X(01)00286-2	BORON ISOTOPE SYSTEMATICS OF SLAB FLUIDS AS INFERRED FROM A SERPENTINE SEAMOUNT, MARIANA FOREARC	EARTH PLANET. SCI. LETT.	BENTON, L. D.; RYAN, J. G.; TERA, F.		19.5418	146.654	0.0001				TIMS	SEDIMENTARY			MUD
125-780D-01X-1,026-028		GEOROC	10.1016/S0012-821X(01)00286-2	BORON ISOTOPE SYSTEMATICS OF SLAB FLUIDS AS INFERRED FROM A SERPENTINE SEAMOUNT, MARIANA FOREARC	EARTH PLANET. SCI. LETT.	BENTON, L. D.; RYAN, J. G.; TERA, F.		19.5418	146.654	0.0001				TIMS_ID	SEDIMENTARY			MUD
125-780D-01X-1,026-028		GEOROC	10.1029/2004GC000708	LITHIUM ABUNDANCE AND ISOTOPE SYSTEMATICS OF FOREARC SERPENTINITES, CONICAL SEAMOUNT, MARIANA FOREARC: INSIGHTS INTO THE MECHANICS OF SLAB-MANTLE EXCHANGE DURING SUBDUCTION	GEOCHEMISTRY GEOPHYSICS GEOSYSTEMS	BENTON, L. D.; RYAN, J. G.; SAVOV, I. P.		19.5418	146.654	0.0001				ICPMS	SEDIMENTARY			MUD
125-780D-01X-1,026-028		GEOROC	10.1029/2004GC000708	LITHIUM ABUNDANCE AND ISOTOPE SYSTEMATICS OF FOREARC SERPENTINITES, CONICAL SEAMOUNT, MARIANA FOREARC: INSIGHTS INTO THE MECHANICS OF SLAB-MANTLE EXCHANGE DURING SUBDUCTION	GEOCHEMISTRY GEOPHYSICS GEOSYSTEMS	BENTON, L. D.; RYAN, J. G.; SAVOV, I. P.		19.5418	146.654	0.0001				DCPAES/MS_ID	SEDIMENTARY			MUD
125-780D-01X-1,026-028		GEOROC	10.1029/2004GC000708	LITHIUM ABUNDANCE AND ISOTOPE SYSTEMATICS OF FOREARC SERPENTINITES, CONICAL SEAMOUNT, MARIANA FOREARC: INSIGHTS INTO THE MECHANICS OF SLAB-MANTLE EXCHANGE DURING SUBDUCTION	GEOCHEMISTRY GEOPHYSICS GEOSYSTEMS	BENTON, L. D.; RYAN, J. G.; SAVOV, I. P.		19.5418	146.654	0.0001				ICPMS	SEDIMENTARY			MUD
125-780D-02X-1,035-037		GEOROC	10.1016/S0012-821X(01)00286-2	BORON ISOTOPE SYSTEMATICS OF SLAB FLUIDS AS INFERRED FROM A SERPENTINE SEAMOUNT, MARIANA FOREARC	EARTH PLANET. SCI. LETT.	BENTON, L. D.; RYAN, J. G.; TERA, F.		19.5418	146.654	0.0001				TIMS_ID	SEDIMENTARY			MUD
125-780D-02X-1,035-037		GEOROC	10.1029/2004GC000708	LITHIUM ABUNDANCE AND ISOTOPE SYSTEMATICS OF FOREARC SERPENTINITES, CONICAL SEAMOUNT, MARIANA FOREARC: INSIGHTS INTO THE MECHANICS OF SLAB-MANTLE EXCHANGE DURING SUBDUCTION	GEOCHEMISTRY GEOPHYSICS GEOSYSTEMS	BENTON, L. D.; RYAN, J. G.; SAVOV, I. P.		19.5418	146.654	0.0001				ICPMS	SEDIMENTARY			MUD
125-780D-02X-1,035-037		GEOROC	10.1029/2004GC000708	LITHIUM ABUNDANCE AND ISOTOPE SYSTEMATICS OF FOREARC SERPENTINITES, CONICAL SEAMOUNT, MARIANA FOREARC: INSIGHTS INTO THE MECHANICS OF SLAB-MANTLE EXCHANGE DURING SUBDUCTION	GEOCHEMISTRY GEOPHYSICS GEOSYSTEMS	BENTON, L. D.; RYAN, J. G.; SAVOV, I. P.		19.5418	146.654	0.0001				DCPAES/MS_ID	SEDIMENTARY			MUD
125-780D-06X-2,033-035		GEOROC	10.1016/S0012-821X(01)00286-2	BORON ISOTOPE SYSTEMATICS OF SLAB FLUIDS AS INFERRED FROM A SERPENTINE SEAMOUNT, MARIANA FOREARC	EARTH PLANET. SCI. LETT.	BENTON, L. D.; RYAN, J. G.; TERA, F.		19.5418	146.654	0.0001				TIMS	SEDIMENTARY			MUD
125-780D-06X-2,033-035		GEOROC	10.1016/S0012-821X(01)00286-2	BORON ISOTOPE SYSTEMATICS OF SLAB FLUIDS AS INFERRED FROM A SERPENTINE SEAMOUNT, MARIANA FOREARC	EARTH PLANET. SCI. LETT.	BENTON, L. D.; RYAN, J. G.; TERA, F.		19.5418	146.654	0.0001				TIMS_ID	SEDIMENTARY			MUD
125-780D-06X-2,033-035		GEOROC	10.1029/2004GC000708	LITHIUM ABUNDANCE AND ISOTOPE SYSTEMATICS OF FOREARC SERPENTINITES, CONICAL SEAMOUNT, MARIANA FOREARC: INSIGHTS INTO THE MECHANICS OF SLAB-MANTLE EXCHANGE DURING SUBDUCTION	GEOCHEMISTRY GEOPHYSICS GEOSYSTEMS	BENTON, L. D.; RYAN, J. G.; SAVOV, I. P.		19.5418	146.654	0.0001				ICPMS	SEDIMENTARY			MUD
125-780D-06X-2,033-035		GEOROC	10.1029/2004GC000708	LITHIUM ABUNDANCE AND ISOTOPE SYSTEMATICS OF FOREARC SERPENTINITES, CONICAL SEAMOUNT, MARIANA FOREARC: INSIGHTS INTO THE MECHANICS OF SLAB-MANTLE EXCHANGE DURING SUBDUCTION	GEOCHEMISTRY GEOPHYSICS GEOSYSTEMS	BENTON, L. D.; RYAN, J. G.; SAVOV, I. P.		19.5418	146.654	0.0001				DCPAES/MS_ID	SEDIMENTARY			MUD
125-780D-07X-5,123-125		GEOROC	10.1016/S0012-821X(01)00286-2	BORON ISOTOPE SYSTEMATICS OF SLAB FLUIDS AS INFERRED FROM A SERPENTINE SEAMOUNT, MARIANA FOREARC	EARTH PLANET. SCI. LETT.	BENTON, L. D.; RYAN, J. G.; TERA, F.		19.5418	146.654	0.0001				TIMS_ID	SEDIMENTARY			MUD
125-780D-07X-5,123-125		GEOROC	10.1029/2004GC000708	LITHIUM ABUNDANCE AND ISOTOPE SYSTEMATICS OF FOREARC SERPENTINITES, CONICAL SEAMOUNT, MARIANA FOREARC: INSIGHTS INTO THE MECHANICS OF SLAB-MANTLE EXCHANGE DURING SUBDUCTION	GEOCHEMISTRY GEOPHYSICS GEOSYSTEMS	BENTON, L. D.; RYAN, J. G.; SAVOV, I. P.		19.5418	146.654	0.0001				ICPMS	SEDIMENTARY			MUD
125-780D-07X-5,123-125		GEOROC	10.1029/2004GC000708	LITHIUM ABUNDANCE AND ISOTOPE SYSTEMATICS OF FOREARC SERPENTINITES, CONICAL SEAMOUNT, MARIANA FOREARC: INSIGHTS INTO THE MECHANICS OF SLAB-MANTLE EXCHANGE DURING SUBDUCTION	GEOCHEMISTRY GEOPHYSICS GEOSYSTEMS	BENTON, L. D.; RYAN, J. G.; SAVOV, I. P.		19.5418	146.654	0.0001				DCPAES/MS_ID	SEDIMENTARY			MUD
20		GEOROC	10.1086/629438	ND AND SR ISOTOPIC CHARACTERIZATION OF THE WRANGELLIA TERRANE AND IMPLICATIONS FOR CRUSTAL GROWTH OF THE CANADIAN CORDILLERA	J. GEOL.	SAMSON, S. D.; PATCHETT, P. J.; GEHRELS, G. E.; ANDERSON, R. G.		48.8481	-123.617	0.0001	350	350	350	TIMS	SEDIMENTARY			MUDSTONE
20		GEOROC	10.1086/629438	ND AND SR ISOTOPIC CHARACTERIZATION OF THE WRANGELLIA TERRANE AND IMPLICATIONS FOR CRUSTAL GROWTH OF THE CANADIAN CORDILLERA	J. GEOL.	SAMSON, S. D.; PATCHETT, P. J.; GEHRELS, G. E.; ANDERSON, R. G.		48.8481	-123.617	0.0001	350	350	350	TIMS_ID	SEDIMENTARY			MUDSTONE
20		GEOROC	10.1086/629438	ND AND SR ISOTOPIC CHARACTERIZATION OF THE WRANGELLIA TERRANE AND IMPLICATIONS FOR CRUSTAL GROWTH OF THE CANADIAN CORDILLERA	J. GEOL.	SAMSON, S. D.; PATCHETT, P. J.; GEHRELS, G. E.; ANDERSON, R. G.		48.8481	-123.617	0.0001	350	350	350	TIMS	SEDIMENTARY			MUDSTONE
20		GEOROC	10.1086/629438	ND AND SR ISOTOPIC CHARACTERIZATION OF THE WRANGELLIA TERRANE AND IMPLICATIONS FOR CRUSTAL GROWTH OF THE CANADIAN CORDILLERA	J. GEOL.	SAMSON, S. D.; PATCHETT, P. J.; GEHRELS, G. E.; ANDERSON, R. G.		48.8481	-123.617	0.0001	350	350	350	TIMS_ID	SEDIMENTARY			MUDSTONE
22		GEOROC	10.1086/629438	ND AND SR ISOTOPIC CHARACTERIZATION OF THE WRANGELLIA TERRANE AND IMPLICATIONS FOR CRUSTAL GROWTH OF THE CANADIAN CORDILLERA	J. GEOL.	SAMSON, S. D.; PATCHETT, P. J.; GEHRELS, G. E.; ANDERSON, R. G.		49.3058	-124.206	0.0001	350	350	350	TIMS	SEDIMENTARY			MUDSTONE
22		GEOROC	10.1086/629438	ND AND SR ISOTOPIC CHARACTERIZATION OF THE WRANGELLIA TERRANE AND IMPLICATIONS FOR CRUSTAL GROWTH OF THE CANADIAN CORDILLERA	J. GEOL.	SAMSON, S. D.; PATCHETT, P. J.; GEHRELS, G. E.; ANDERSON, R. G.		49.3058	-124.206	0.0001	350	350	350	TIMS_ID	SEDIMENTARY			MUDSTONE
24		GEOROC	10.1086/629438	ND AND SR ISOTOPIC CHARACTERIZATION OF THE WRANGELLIA TERRANE AND IMPLICATIONS FOR CRUSTAL GROWTH OF THE CANADIAN CORDILLERA	J. GEOL.	SAMSON, S. D.; PATCHETT, P. J.; GEHRELS, G. E.; ANDERSON, R. G.		49.1714	-124.547	0.0001	290	290	290	TIMS	SEDIMENTARY			MUDSTONE
24		GEOROC	10.1086/629438	ND AND SR ISOTOPIC CHARACTERIZATION OF THE WRANGELLIA TERRANE AND IMPLICATIONS FOR CRUSTAL GROWTH OF THE CANADIAN CORDILLERA	J. GEOL.	SAMSON, S. D.; PATCHETT, P. J.; GEHRELS, G. E.; ANDERSON, R. G.		49.1714	-124.547	0.0001	290	290	290	TIMS_ID	SEDIMENTARY			MUDSTONE
25		GEOROC	10.1086/629438	ND AND SR ISOTOPIC CHARACTERIZATION OF THE WRANGELLIA TERRANE AND IMPLICATIONS FOR CRUSTAL GROWTH OF THE CANADIAN CORDILLERA	J. GEOL.	SAMSON, S. D.; PATCHETT, P. J.; GEHRELS, G. E.; ANDERSON, R. G.		49.1689	-124.548	0.0001	290	290	290	TIMS	SEDIMENTARY			MUDSTONE
25		GEOROC	10.1086/629438	ND AND SR ISOTOPIC CHARACTERIZATION OF THE WRANGELLIA TERRANE AND IMPLICATIONS FOR CRUSTAL GROWTH OF THE CANADIAN CORDILLERA	J. GEOL.	SAMSON, S. D.; PATCHETT, P. J.; GEHRELS, G. E.; ANDERSON, R. G.		49.1689	-124.548	0.0001	290	290	290	TIMS_ID	SEDIMENTARY			MUDSTONE
26		GEOROC	10.1086/629438	ND AND SR ISOTOPIC CHARACTERIZATION OF THE WRANGELLIA TERRANE AND IMPLICATIONS FOR CRUSTAL GROWTH OF THE CANADIAN CORDILLERA	J. GEOL.	SAMSON, S. D.; PATCHETT, P. J.; GEHRELS, G. E.; ANDERSON, R. G.		53.4106	-132.307	0.0001	200	200	200	TIMS	SEDIMENTARY			MUDSTONE
26		GEOROC	10.1086/629438	ND AND SR ISOTOPIC CHARACTERIZATION OF THE WRANGELLIA TERRANE AND IMPLICATIONS FOR CRUSTAL GROWTH OF THE CANADIAN CORDILLERA	J. GEOL.	SAMSON, S. D.; PATCHETT, P. J.; GEHRELS, G. E.; ANDERSON, R. G.		53.4106	-132.307	0.0001	200	200	200	TIMS_ID	SEDIMENTARY			MUDSTONE
30		GEOROC	10.1086/629438	ND AND SR ISOTOPIC CHARACTERIZATION OF THE WRANGELLIA TERRANE AND IMPLICATIONS FOR CRUSTAL GROWTH OF THE CANADIAN CORDILLERA	J. GEOL.	SAMSON, S. D.; PATCHETT, P. J.; GEHRELS, G. E.; ANDERSON, R. G.		53.2533	-132.118	0.0001	90	90	90	TIMS	SEDIMENTARY			MUDSTONE
30		GEOROC	10.1086/629438	ND AND SR ISOTOPIC CHARACTERIZATION OF THE WRANGELLIA TERRANE AND IMPLICATIONS FOR CRUSTAL GROWTH OF THE CANADIAN CORDILLERA	J. GEOL.	SAMSON, S. D.; PATCHETT, P. J.; GEHRELS, G. E.; ANDERSON, R. G.		53.2533	-132.118	0.0001	90	90	90	TIMS_ID	SEDIMENTARY			MUDSTONE
31		GEOROC	10.1086/629438	ND AND SR ISOTOPIC CHARACTERIZATION OF THE WRANGELLIA TERRANE AND IMPLICATIONS FOR CRUSTAL GROWTH OF THE CANADIAN CORDILLERA	J. GEOL.	SAMSON, S. D.; PATCHETT, P. J.; GEHRELS, G. E.; ANDERSON, R. G.		53.2411	-132.2	0.0001	90	90	90	TIMS	SEDIMENTARY			MUDSTONE
31		GEOROC	10.1086/629438	ND AND SR ISOTOPIC CHARACTERIZATION OF THE WRANGELLIA TERRANE AND IMPLICATIONS FOR CRUSTAL GROWTH OF THE CANADIAN CORDILLERA	J. GEOL.	SAMSON, S. D.; PATCHETT, P. J.; GEHRELS, G. E.; ANDERSON, R. G.		53.2411	-132.2	0.0001	90	90	90	TIMS_ID	SEDIMENTARY			MUDSTONE
YM1		GEOROC	10.1016/S0377-0273(99)00131-6	GEOCHEMISTRY AND ORIGINS OF UENO AND ON-TAKE BASALTIC TO ANDESITIC ROCKS (<3 MA) PRODUCED BY DISTINCT CONTRIBUTIONS OF SUBDUCTION COMPONENTS, CENTRAL JAPAN	J. VOLCANOL. GEOTHERM. RES.	UJIKE, O.; STIX, J.		35.8	137.5	0.1				TIMS	SEDIMENTARY			MUDSTONE
021B		GEOROC	10.1007/BF02597097	AMPHIBOLE-BEARING BASALTS FROM THE SUBMARINE VOLCANO KICK^EM-JENNY IN THE LESSER ANTILLES ISLAND ARC	BULL. VOLCANOL.	SIGURDSSON, H.; SHEPHERD, J. B.		12.2972	61.6378	0.0001				WET	SEDIMENTARY			MUD		30.25	0.51	10.29		27.1		1.21		0.06	4.88	4.61	5.06	0.76	0.41			2.99	7.06
DELP84D-6		GEOROC		REPORT ON DELP 1984 CRUISES IN THE MIDDLE OKINAWA TROUGH PART V : TOPOGRAPHY AND GEOLOGY OF THE CENTRAL GRABENS AND THEIR VICINITY	BULL. EARTHQUAKE RES. INST.	KIMURA, M.; KANEOKA, I.; KATO, Y.; YAMAMOTO, S.; KUSHIRO, I.; TOKUYAMA, H.; KINOSHITA, H.; ISEZAKI, N.; MASAKI, H.; OSHIDA, A.; UYEDA, S.; HILDE, T. W. C.		30.5047	126.859	0.0001				NOT	SEDIMENTARY			MUD																							2.08	3360	23	9.6	27.4		12.4
RN-80PC-3, 50-55 CM		GEOROC		REPORT ON DELP 1984 CRUISES IN THE MIDDLE OKINAWA TROUGH PART V : TOPOGRAPHY AND GEOLOGY OF THE CENTRAL GRABENS AND THEIR VICINITY	BULL. EARTHQUAKE RES. INST.	KIMURA, M.; KANEOKA, I.; KATO, Y.; YAMAMOTO, S.; KUSHIRO, I.; TOKUYAMA, H.; KINOSHITA, H.; ISEZAKI, N.; MASAKI, H.; OSHIDA, A.; UYEDA, S.; HILDE, T. W. C.		29.06	127.5	0.01				NOT	SEDIMENTARY			MUD																							1.71	232	15.4	6.5	8.3		16.5
RN-80PC-3, 120-125 CM		GEOROC		REPORT ON DELP 1984 CRUISES IN THE MIDDLE OKINAWA TROUGH PART V : TOPOGRAPHY AND GEOLOGY OF THE CENTRAL GRABENS AND THEIR VICINITY	BULL. EARTHQUAKE RES. INST.	KIMURA, M.; KANEOKA, I.; KATO, Y.; YAMAMOTO, S.; KUSHIRO, I.; TOKUYAMA, H.; KINOSHITA, H.; ISEZAKI, N.; MASAKI, H.; OSHIDA, A.; UYEDA, S.; HILDE, T. W. C.		29.06	127.5	0.01				NOT	SEDIMENTARY			MUD																							1.51	233	13.5	7.4	7.5		10.3
RN-80PC-3, 370-375 CM		GEOROC		REPORT ON DELP 1984 CRUISES IN THE MIDDLE OKINAWA TROUGH PART V : TOPOGRAPHY AND GEOLOGY OF THE CENTRAL GRABENS AND THEIR VICINITY	BULL. EARTHQUAKE RES. INST.	KIMURA, M.; KANEOKA, I.; KATO, Y.; YAMAMOTO, S.; KUSHIRO, I.; TOKUYAMA, H.; KINOSHITA, H.; ISEZAKI, N.; MASAKI, H.; OSHIDA, A.; UYEDA, S.; HILDE, T. W. C.		29.06	127.5	0.01				NOT	SEDIMENTARY			MUD																							2.11	293	15.4	7.4	10		14.2
NZ-404CP		GEOROC	10.1093/petrology/41.6.759	THE ISOTOPE AND TRACE ELEMENT BUDGET OF THE CAMBRIAN DEVIL RIVER ARC SYSTEM, NEW ZEALAND: IDENTIFICATION OF FOUR SOURCE COMPONENTS	J. PETROL.	MÜNKER, C.		-40.87	172.82	0.01				MS_ID	SEDIMENTARY			MUDSTONE
NZ-408		GEOROC	10.1093/petrology/41.6.759	THE ISOTOPE AND TRACE ELEMENT BUDGET OF THE CAMBRIAN DEVIL RIVER ARC SYSTEM, NEW ZEALAND: IDENTIFICATION OF FOUR SOURCE COMPONENTS	J. PETROL.	MÜNKER, C.		-40.87	172.82	0.01				MS_ID	SEDIMENTARY			MUDSTONE
939-90-20		GEOROC	10.1016/0016-7037(93)90116-E	SM-ND ISOTOPIC EVIDENCE FOR THE PROVENANCE OF SEDIMENTS FROM THE ADELAIDE FOLD BELT AND SOUTHEASTERN AUSTRALIA WITH IMPLICATIONS FOR EPISODIC CRUSTAL ADDITION	GEOCHIM. COSMOCHIM. ACTA	TURNER, SIMON P.; FODEN, J. D.; SANDIFORD, M.; BRUCE, D.		-37.4	144.9	0.1	440	440	440	XRF	SEDIMENTARY			MUDSTONE		33.09	0.41	10.9		3.48				0.04	2.19	24.05	0.04	2.74	0.1										35
939-90-20		GEOROC	10.1016/0016-7037(93)90116-E	SM-ND ISOTOPIC EVIDENCE FOR THE PROVENANCE OF SEDIMENTS FROM THE ADELAIDE FOLD BELT AND SOUTHEASTERN AUSTRALIA WITH IMPLICATIONS FOR EPISODIC CRUSTAL ADDITION	GEOCHIM. COSMOCHIM. ACTA	TURNER, SIMON P.; FODEN, J. D.; SANDIFORD, M.; BRUCE, D.		-37.4	144.9	0.1	440	440	440	IGN	SEDIMENTARY			MUDSTONE																	22.2
939-90-20		GEOROC	10.1016/0016-7037(93)90116-E	SM-ND ISOTOPIC EVIDENCE FOR THE PROVENANCE OF SEDIMENTS FROM THE ADELAIDE FOLD BELT AND SOUTHEASTERN AUSTRALIA WITH IMPLICATIONS FOR EPISODIC CRUSTAL ADDITION	GEOCHIM. COSMOCHIM. ACTA	TURNER, SIMON P.; FODEN, J. D.; SANDIFORD, M.; BRUCE, D.		-37.4	144.9	0.1	440	440	440	NOT	SEDIMENTARY			MUDSTONE
939-90-20		GEOROC	10.1016/0016-7037(93)90116-E	SM-ND ISOTOPIC EVIDENCE FOR THE PROVENANCE OF SEDIMENTS FROM THE ADELAIDE FOLD BELT AND SOUTHEASTERN AUSTRALIA WITH IMPLICATIONS FOR EPISODIC CRUSTAL ADDITION	GEOCHIM. COSMOCHIM. ACTA	TURNER, SIMON P.; FODEN, J. D.; SANDIFORD, M.; BRUCE, D.		-37.4	144.9	0.1	440	440	440	TIMS	SEDIMENTARY			MUDSTONE
71604		GEOROC		ISOTOPIC COMPOSITION OF SULFUR IN THE OSHIRABETSU GABBROIC COMPLEX AND THE ASSOCIATED NICKELIFEROUS PYRRHOTITE ORE - MAGMATIC SULFIDE MINERALIZATION AND THE EXTERNAL SOURCE OF SULFUR.	MINING GEOL.	TAKAHASHI, T.; SASAKI, A.		42.2	143.2	0.1				NOT	SEDIMENTARY			MUDSTONE
370		GEOROC	10.1139/e92-174	AN ISOTOPIC STUDY OF THE ISLAND LAKE GREENSTONE BELT, MANITOBA: CRUSTAL EVOLUTION AND PROGRESSIVE CRATONIZATION IN THE LATE ARCHEAN	CAN. J. EARTH SCI.	STEVENSON, R. K.; TUREK, A.		53.8	-94.5	0.1				TIMS	SEDIMENTARY			MUDSTONE
370		GEOROC	10.1139/e92-174	AN ISOTOPIC STUDY OF THE ISLAND LAKE GREENSTONE BELT, MANITOBA: CRUSTAL EVOLUTION AND PROGRESSIVE CRATONIZATION IN THE LATE ARCHEAN	CAN. J. EARTH SCI.	STEVENSON, R. K.; TUREK, A.		53.8	-94.5	0.1				TIMS_ID	SEDIMENTARY			MUDSTONE
02SE03-1M		GEOROC		SIGNIFICANCE OF WHOLE-ROCK CHEMICAL ANALYSIS FOR IGNIMBRITES: CHEMICAL COMPARISON BETWEEN ESSENTIAL CLASTS AND MATRIX OF THE LATE CRETACEOUS SETOGAWA ASH-FLOW SHEET OF THE NOHI RHYOLITE	EARTH SCIENCE (CHIKYU KAGAKU)	SONEHARA, T.; HARAYAMA, S.		35.75	137.58	0.01				XRF	SEDIMENTARY			MUDSTONE		71.36	0.7	13.64			4.43			0.07	0.83	2.54	2.51	2.99	0.17		4.23								23	7			93
02SE03-2M		GEOROC		SIGNIFICANCE OF WHOLE-ROCK CHEMICAL ANALYSIS FOR IGNIMBRITES: CHEMICAL COMPARISON BETWEEN ESSENTIAL CLASTS AND MATRIX OF THE LATE CRETACEOUS SETOGAWA ASH-FLOW SHEET OF THE NOHI RHYOLITE	EARTH SCIENCE (CHIKYU KAGAKU)	SONEHARA, T.; HARAYAMA, S.		35.75	137.58	0.01				XRF	SEDIMENTARY			MUDSTONE		69.93	0.27	19.35			2.56			0.04	0.7	0.39	0.62	5.85	0.06		3.18								11	6.8			58
CA-1		GEOROC	10.1016/S0040-1951(02)00193-2	LATE NEOPROTEROZOIC CRUSTAL GROWTH IN THE EUROPEAN VARISCIDES: ND ISOTOPE AND GEOCHEMICAL EVIDENCE FROM THE SIERRA DE CÓRDOBA ANDESITES (OSSA-MORENA ZONE, SOUTHERN SPAIN)	TECTONOPHYSICS	PIN, C.; LINAN, E.; PASCUAL, E.; DONAIRE, T.; VALENZUELA, A.		38	-4.83	0.01				ICPAES	SEDIMENTARY			MUDSTONE		64.3	0.76	15.8		6.33				0.09	3.02	0.82	2.78	3.2											35
CA-1		GEOROC	10.1016/S0040-1951(02)00193-2	LATE NEOPROTEROZOIC CRUSTAL GROWTH IN THE EUROPEAN VARISCIDES: ND ISOTOPE AND GEOCHEMICAL EVIDENCE FROM THE SIERRA DE CÓRDOBA ANDESITES (OSSA-MORENA ZONE, SOUTHERN SPAIN)	TECTONOPHYSICS	PIN, C.; LINAN, E.; PASCUAL, E.; DONAIRE, T.; VALENZUELA, A.		38	-4.83	0.01				XRF	SEDIMENTARY			MUDSTONE
CA-1		GEOROC	10.1016/S0040-1951(02)00193-2	LATE NEOPROTEROZOIC CRUSTAL GROWTH IN THE EUROPEAN VARISCIDES: ND ISOTOPE AND GEOCHEMICAL EVIDENCE FROM THE SIERRA DE CÓRDOBA ANDESITES (OSSA-MORENA ZONE, SOUTHERN SPAIN)	TECTONOPHYSICS	PIN, C.; LINAN, E.; PASCUAL, E.; DONAIRE, T.; VALENZUELA, A.		38	-4.83	0.01				IGN	SEDIMENTARY			MUDSTONE																	3.43
CA-1		GEOROC	10.1016/S0040-1951(02)00193-2	LATE NEOPROTEROZOIC CRUSTAL GROWTH IN THE EUROPEAN VARISCIDES: ND ISOTOPE AND GEOCHEMICAL EVIDENCE FROM THE SIERRA DE CÓRDOBA ANDESITES (OSSA-MORENA ZONE, SOUTHERN SPAIN)	TECTONOPHYSICS	PIN, C.; LINAN, E.; PASCUAL, E.; DONAIRE, T.; VALENZUELA, A.		38	-4.83	0.01				TIMS_ID	SEDIMENTARY			MUDSTONE
CA-1		GEOROC	10.1016/S0040-1951(02)00193-2	LATE NEOPROTEROZOIC CRUSTAL GROWTH IN THE EUROPEAN VARISCIDES: ND ISOTOPE AND GEOCHEMICAL EVIDENCE FROM THE SIERRA DE CÓRDOBA ANDESITES (OSSA-MORENA ZONE, SOUTHERN SPAIN)	TECTONOPHYSICS	PIN, C.; LINAN, E.; PASCUAL, E.; DONAIRE, T.; VALENZUELA, A.		38	-4.83	0.01				TIMS	SEDIMENTARY			MUDSTONE
CA-4		GEOROC	10.1016/S0040-1951(02)00193-2	LATE NEOPROTEROZOIC CRUSTAL GROWTH IN THE EUROPEAN VARISCIDES: ND ISOTOPE AND GEOCHEMICAL EVIDENCE FROM THE SIERRA DE CÓRDOBA ANDESITES (OSSA-MORENA ZONE, SOUTHERN SPAIN)	TECTONOPHYSICS	PIN, C.; LINAN, E.; PASCUAL, E.; DONAIRE, T.; VALENZUELA, A.		38	-4.83	0.01				ICPAES	SEDIMENTARY			MUDSTONE		67	0.88	17.1		4.96				0.05	2.3	0.38	0.38	4.38											41
CA-4		GEOROC	10.1016/S0040-1951(02)00193-2	LATE NEOPROTEROZOIC CRUSTAL GROWTH IN THE EUROPEAN VARISCIDES: ND ISOTOPE AND GEOCHEMICAL EVIDENCE FROM THE SIERRA DE CÓRDOBA ANDESITES (OSSA-MORENA ZONE, SOUTHERN SPAIN)	TECTONOPHYSICS	PIN, C.; LINAN, E.; PASCUAL, E.; DONAIRE, T.; VALENZUELA, A.		38	-4.83	0.01				XRF	SEDIMENTARY			MUDSTONE
CA-4		GEOROC	10.1016/S0040-1951(02)00193-2	LATE NEOPROTEROZOIC CRUSTAL GROWTH IN THE EUROPEAN VARISCIDES: ND ISOTOPE AND GEOCHEMICAL EVIDENCE FROM THE SIERRA DE CÓRDOBA ANDESITES (OSSA-MORENA ZONE, SOUTHERN SPAIN)	TECTONOPHYSICS	PIN, C.; LINAN, E.; PASCUAL, E.; DONAIRE, T.; VALENZUELA, A.		38	-4.83	0.01				IGN	SEDIMENTARY			MUDSTONE																	3.51
CA-4		GEOROC	10.1016/S0040-1951(02)00193-2	LATE NEOPROTEROZOIC CRUSTAL GROWTH IN THE EUROPEAN VARISCIDES: ND ISOTOPE AND GEOCHEMICAL EVIDENCE FROM THE SIERRA DE CÓRDOBA ANDESITES (OSSA-MORENA ZONE, SOUTHERN SPAIN)	TECTONOPHYSICS	PIN, C.; LINAN, E.; PASCUAL, E.; DONAIRE, T.; VALENZUELA, A.		38	-4.83	0.01				TIMS_ID	SEDIMENTARY			MUDSTONE
CA-4		GEOROC	10.1016/S0040-1951(02)00193-2	LATE NEOPROTEROZOIC CRUSTAL GROWTH IN THE EUROPEAN VARISCIDES: ND ISOTOPE AND GEOCHEMICAL EVIDENCE FROM THE SIERRA DE CÓRDOBA ANDESITES (OSSA-MORENA ZONE, SOUTHERN SPAIN)	TECTONOPHYSICS	PIN, C.; LINAN, E.; PASCUAL, E.; DONAIRE, T.; VALENZUELA, A.		38	-4.83	0.01				TIMS	SEDIMENTARY			MUDSTONE
E99102		GEOROC	10.2113/gsecongeo.96.6.1361	RADIOGENIC LEAD SIGNATURES IN AU-RICH VOLCANIC-HOSTED MASSIVE SULFIDE ORES AND ASSOCIATED VOLCANIC ROCKS OF THE EARLY TERTIARY MACUCHI ISLAND ARC (WESTERN CORDILLERA OF ECUADOR)	ECON. GEOL.	CHIARADIA, M.; FONTBOTE, L.		-0.25	-79.05	0.01				XRF	SEDIMENTARY			MUDSTONE		68.2	0.41	12.14			5.89			0.22	2.61	4.23	1.34	1.35	0.1										41		84		86
E99102		GEOROC	10.2113/gsecongeo.96.6.1361	RADIOGENIC LEAD SIGNATURES IN AU-RICH VOLCANIC-HOSTED MASSIVE SULFIDE ORES AND ASSOCIATED VOLCANIC ROCKS OF THE EARLY TERTIARY MACUCHI ISLAND ARC (WESTERN CORDILLERA OF ECUADOR)	ECON. GEOL.	CHIARADIA, M.; FONTBOTE, L.		-0.25	-79.05	0.01				IGN	SEDIMENTARY			MUDSTONE																	3.17
E99111		GEOROC	10.2113/gsecongeo.96.6.1361	RADIOGENIC LEAD SIGNATURES IN AU-RICH VOLCANIC-HOSTED MASSIVE SULFIDE ORES AND ASSOCIATED VOLCANIC ROCKS OF THE EARLY TERTIARY MACUCHI ISLAND ARC (WESTERN CORDILLERA OF ECUADOR)	ECON. GEOL.	CHIARADIA, M.; FONTBOTE, L.		-0.28	-79.03	0.01				XRF	SEDIMENTARY			MUDSTONE		60.8	0.28	7.29			2.56			0.1	0.74	13.84	0	0.42	0.15										32		66		66
E99111		GEOROC	10.2113/gsecongeo.96.6.1361	RADIOGENIC LEAD SIGNATURES IN AU-RICH VOLCANIC-HOSTED MASSIVE SULFIDE ORES AND ASSOCIATED VOLCANIC ROCKS OF THE EARLY TERTIARY MACUCHI ISLAND ARC (WESTERN CORDILLERA OF ECUADOR)	ECON. GEOL.	CHIARADIA, M.; FONTBOTE, L.		-0.28	-79.03	0.01				IGN	SEDIMENTARY			MUDSTONE																	13.81
E99102_RESIDUAL		GEOROC	10.2113/gsecongeo.96.6.1361	RADIOGENIC LEAD SIGNATURES IN AU-RICH VOLCANIC-HOSTED MASSIVE SULFIDE ORES AND ASSOCIATED VOLCANIC ROCKS OF THE EARLY TERTIARY MACUCHI ISLAND ARC (WESTERN CORDILLERA OF ECUADOR)	ECON. GEOL.	CHIARADIA, M.; FONTBOTE, L.		-0.25	-79.05	0.01				TIMS	SEDIMENTARY			MUDSTONE
E99111_RESIDUAL		GEOROC	10.2113/gsecongeo.96.6.1361	RADIOGENIC LEAD SIGNATURES IN AU-RICH VOLCANIC-HOSTED MASSIVE SULFIDE ORES AND ASSOCIATED VOLCANIC ROCKS OF THE EARLY TERTIARY MACUCHI ISLAND ARC (WESTERN CORDILLERA OF ECUADOR)	ECON. GEOL.	CHIARADIA, M.; FONTBOTE, L.		-0.28	-79.03	0.01				TIMS	SEDIMENTARY			MUDSTONE
E99102_LEACHATE		GEOROC	10.2113/gsecongeo.96.6.1361	RADIOGENIC LEAD SIGNATURES IN AU-RICH VOLCANIC-HOSTED MASSIVE SULFIDE ORES AND ASSOCIATED VOLCANIC ROCKS OF THE EARLY TERTIARY MACUCHI ISLAND ARC (WESTERN CORDILLERA OF ECUADOR)	ECON. GEOL.	CHIARADIA, M.; FONTBOTE, L.		-0.25	-79.05	0.01				TIMS	SEDIMENTARY			MUDSTONE
E99111_LEACHATE		GEOROC	10.2113/gsecongeo.96.6.1361	RADIOGENIC LEAD SIGNATURES IN AU-RICH VOLCANIC-HOSTED MASSIVE SULFIDE ORES AND ASSOCIATED VOLCANIC ROCKS OF THE EARLY TERTIARY MACUCHI ISLAND ARC (WESTERN CORDILLERA OF ECUADOR)	ECON. GEOL.	CHIARADIA, M.; FONTBOTE, L.		-0.28	-79.03	0.01				TIMS	SEDIMENTARY			MUDSTONE
2005085301		GEOROC	10.1007/s00126-010-0281-z	TYPECASTING PROSPECTIVE AU-BEARING SEDIMENTARY LITHOLOGIES USING SEDIMENTARY GEOCHEMISTRY AND ND ISOTOPES IN POORLY EXPOSED PROTEROZOIC BASINS OF THE TANAMI REGION, NORTHERN AUSTRALIA	MINER. DEPOSITA	LAMBECK, A.; HUSTON, D. L.; BAROVICH, K. M.		-20.2372	129.546	1e-06	1840	1840	1840	TIMS_ID	SEDIMENTARY			MUDSTONE
2005085301		GEOROC	10.1007/s00126-010-0281-z	TYPECASTING PROSPECTIVE AU-BEARING SEDIMENTARY LITHOLOGIES USING SEDIMENTARY GEOCHEMISTRY AND ND ISOTOPES IN POORLY EXPOSED PROTEROZOIC BASINS OF THE TANAMI REGION, NORTHERN AUSTRALIA	MINER. DEPOSITA	LAMBECK, A.; HUSTON, D. L.; BAROVICH, K. M.		-20.2372	129.546	1e-06	1840	1840	1840	TIMS	SEDIMENTARY			MUDSTONE
2005085300		GEOROC	10.1007/s00126-010-0281-z	TYPECASTING PROSPECTIVE AU-BEARING SEDIMENTARY LITHOLOGIES USING SEDIMENTARY GEOCHEMISTRY AND ND ISOTOPES IN POORLY EXPOSED PROTEROZOIC BASINS OF THE TANAMI REGION, NORTHERN AUSTRALIA	MINER. DEPOSITA	LAMBECK, A.; HUSTON, D. L.; BAROVICH, K. M.		-20.2372	129.546	1e-06	1840	1840	1840	TIMS_ID	SEDIMENTARY			MUDSTONE
2005085300		GEOROC	10.1007/s00126-010-0281-z	TYPECASTING PROSPECTIVE AU-BEARING SEDIMENTARY LITHOLOGIES USING SEDIMENTARY GEOCHEMISTRY AND ND ISOTOPES IN POORLY EXPOSED PROTEROZOIC BASINS OF THE TANAMI REGION, NORTHERN AUSTRALIA	MINER. DEPOSITA	LAMBECK, A.; HUSTON, D. L.; BAROVICH, K. M.		-20.2372	129.546	1e-06	1840	1840	1840	TIMS	SEDIMENTARY			MUDSTONE
2003085142		GEOROC	10.1007/s00126-010-0281-z	TYPECASTING PROSPECTIVE AU-BEARING SEDIMENTARY LITHOLOGIES USING SEDIMENTARY GEOCHEMISTRY AND ND ISOTOPES IN POORLY EXPOSED PROTEROZOIC BASINS OF THE TANAMI REGION, NORTHERN AUSTRALIA	MINER. DEPOSITA	LAMBECK, A.; HUSTON, D. L.; BAROVICH, K. M.		-20.5331	129.914	1e-06	1840	1840	1840	TIMS_ID	SEDIMENTARY			MUDSTONE
2003085142		GEOROC	10.1007/s00126-010-0281-z	TYPECASTING PROSPECTIVE AU-BEARING SEDIMENTARY LITHOLOGIES USING SEDIMENTARY GEOCHEMISTRY AND ND ISOTOPES IN POORLY EXPOSED PROTEROZOIC BASINS OF THE TANAMI REGION, NORTHERN AUSTRALIA	MINER. DEPOSITA	LAMBECK, A.; HUSTON, D. L.; BAROVICH, K. M.		-20.5331	129.914	1e-06	1840	1840	1840	TIMS	SEDIMENTARY			MUDSTONE
2004085495		GEOROC	10.1007/s00126-010-0281-z	TYPECASTING PROSPECTIVE AU-BEARING SEDIMENTARY LITHOLOGIES USING SEDIMENTARY GEOCHEMISTRY AND ND ISOTOPES IN POORLY EXPOSED PROTEROZOIC BASINS OF THE TANAMI REGION, NORTHERN AUSTRALIA	MINER. DEPOSITA	LAMBECK, A.; HUSTON, D. L.; BAROVICH, K. M.		-19.5849	128.866	1e-05				XRF	SEDIMENTARY			MUDSTONE		61.9	0.5	18.4			5.8			0	2.7	0.4	0.4	5.6	0.1					1.2							42		145
2004085495		GEOROC	10.1007/s00126-010-0281-z	TYPECASTING PROSPECTIVE AU-BEARING SEDIMENTARY LITHOLOGIES USING SEDIMENTARY GEOCHEMISTRY AND ND ISOTOPES IN POORLY EXPOSED PROTEROZOIC BASINS OF THE TANAMI REGION, NORTHERN AUSTRALIA	MINER. DEPOSITA	LAMBECK, A.; HUSTON, D. L.; BAROVICH, K. M.		-19.5849	128.866	1e-05				IGN	SEDIMENTARY			MUDSTONE																	2.7
2004085495		GEOROC	10.1007/s00126-010-0281-z	TYPECASTING PROSPECTIVE AU-BEARING SEDIMENTARY LITHOLOGIES USING SEDIMENTARY GEOCHEMISTRY AND ND ISOTOPES IN POORLY EXPOSED PROTEROZOIC BASINS OF THE TANAMI REGION, NORTHERN AUSTRALIA	MINER. DEPOSITA	LAMBECK, A.; HUSTON, D. L.; BAROVICH, K. M.		-19.5849	128.866	1e-05				ICPMS	SEDIMENTARY			MUDSTONE																														0	4.5
2004085523		GEOROC	10.1007/s00126-010-0281-z	TYPECASTING PROSPECTIVE AU-BEARING SEDIMENTARY LITHOLOGIES USING SEDIMENTARY GEOCHEMISTRY AND ND ISOTOPES IN POORLY EXPOSED PROTEROZOIC BASINS OF THE TANAMI REGION, NORTHERN AUSTRALIA	MINER. DEPOSITA	LAMBECK, A.; HUSTON, D. L.; BAROVICH, K. M.		-19.5849	128.866	1e-05				XRF	SEDIMENTARY			MUDSTONE		64.2	0.6	18.1			5.4			0	1.7	0.2	0.5	5.2	0.1					0							23		90
2004085523		GEOROC	10.1007/s00126-010-0281-z	TYPECASTING PROSPECTIVE AU-BEARING SEDIMENTARY LITHOLOGIES USING SEDIMENTARY GEOCHEMISTRY AND ND ISOTOPES IN POORLY EXPOSED PROTEROZOIC BASINS OF THE TANAMI REGION, NORTHERN AUSTRALIA	MINER. DEPOSITA	LAMBECK, A.; HUSTON, D. L.; BAROVICH, K. M.		-19.5849	128.866	1e-05				IGN	SEDIMENTARY			MUDSTONE																	3.7
2004085523		GEOROC	10.1007/s00126-010-0281-z	TYPECASTING PROSPECTIVE AU-BEARING SEDIMENTARY LITHOLOGIES USING SEDIMENTARY GEOCHEMISTRY AND ND ISOTOPES IN POORLY EXPOSED PROTEROZOIC BASINS OF THE TANAMI REGION, NORTHERN AUSTRALIA	MINER. DEPOSITA	LAMBECK, A.; HUSTON, D. L.; BAROVICH, K. M.		-19.5849	128.866	1e-05				ICPMS	SEDIMENTARY			MUDSTONE																														4.6	1
2004085535		GEOROC	10.1007/s00126-010-0281-z	TYPECASTING PROSPECTIVE AU-BEARING SEDIMENTARY LITHOLOGIES USING SEDIMENTARY GEOCHEMISTRY AND ND ISOTOPES IN POORLY EXPOSED PROTEROZOIC BASINS OF THE TANAMI REGION, NORTHERN AUSTRALIA	MINER. DEPOSITA	LAMBECK, A.; HUSTON, D. L.; BAROVICH, K. M.		-19.5849	128.866	1e-05				XRF	SEDIMENTARY			MUDSTONE		61.1	0.5	18.2			6.5			0	2.7	0.2	0.2	5.3	0.1					0.7							273		131
2004085535		GEOROC	10.1007/s00126-010-0281-z	TYPECASTING PROSPECTIVE AU-BEARING SEDIMENTARY LITHOLOGIES USING SEDIMENTARY GEOCHEMISTRY AND ND ISOTOPES IN POORLY EXPOSED PROTEROZOIC BASINS OF THE TANAMI REGION, NORTHERN AUSTRALIA	MINER. DEPOSITA	LAMBECK, A.; HUSTON, D. L.; BAROVICH, K. M.		-19.5849	128.866	1e-05				IGN	SEDIMENTARY			MUDSTONE																	4.4
2004085535		GEOROC	10.1007/s00126-010-0281-z	TYPECASTING PROSPECTIVE AU-BEARING SEDIMENTARY LITHOLOGIES USING SEDIMENTARY GEOCHEMISTRY AND ND ISOTOPES IN POORLY EXPOSED PROTEROZOIC BASINS OF THE TANAMI REGION, NORTHERN AUSTRALIA	MINER. DEPOSITA	LAMBECK, A.; HUSTON, D. L.; BAROVICH, K. M.		-19.5849	128.866	1e-05				ICPMS	SEDIMENTARY			MUDSTONE																														55.5	0.8
SEDC		GEOROC	10.1016/j.gca.2014.04.025	INSIGHTS FROM PB AND O ISOTOPES INTO ALONG-ARC VARIATIONS IN SUBDUCTION INPUTS AND CRUSTAL ASSIMILATION FOR VOLCANIC ROCKS IN JAVA, SUNDA ARC, INDONESIA	GEOCHIM. COSMOCHIM. ACTA	HANDLEY, H. K.; BLICHERT-TOFT, J.; GERTISSER, R.; MACPHERSON, C. G.; TURNER, SIMON P.; ZAENNUDIN, A.; ABDURRACHMAN, M.		-6.62519	106.885	1e-05				MC_ICPMS	SEDIMENTARY			MUDSTONE
SEDC		GEOROC	10.1016/j.gca.2014.04.025	INSIGHTS FROM PB AND O ISOTOPES INTO ALONG-ARC VARIATIONS IN SUBDUCTION INPUTS AND CRUSTAL ASSIMILATION FOR VOLCANIC ROCKS IN JAVA, SUNDA ARC, INDONESIA	GEOCHIM. COSMOCHIM. ACTA	HANDLEY, H. K.; BLICHERT-TOFT, J.; GERTISSER, R.; MACPHERSON, C. G.; TURNER, SIMON P.; ZAENNUDIN, A.; ABDURRACHMAN, M.		-6.62519	106.885	1e-05				XRF	SEDIMENTARY			MUDSTONE		55.74	0.87	22.29			6.53			0.05	2.13	0.72	0.36	2.01	0.05		9
SEDC		GEOROC	10.1016/j.gca.2014.04.025	INSIGHTS FROM PB AND O ISOTOPES INTO ALONG-ARC VARIATIONS IN SUBDUCTION INPUTS AND CRUSTAL ASSIMILATION FOR VOLCANIC ROCKS IN JAVA, SUNDA ARC, INDONESIA	GEOCHIM. COSMOCHIM. ACTA	HANDLEY, H. K.; BLICHERT-TOFT, J.; GERTISSER, R.; MACPHERSON, C. G.; TURNER, SIMON P.; ZAENNUDIN, A.; ABDURRACHMAN, M.		-6.62519	106.885	1e-05				Q_ICPMS	SEDIMENTARY			MUDSTONE																									23.5	14.1	14.6		88.4
PNT51		GEOROC	10.1016/j.lithos.2014.09.022	ORIGIN OF PERMIAN BASALTS AND CLASTIC ROCKS IN NAPO, SOUTHWEST CHINA: IMPLICATIONS FOR THE EROSION AND ERUPTION OF THE EMEISHAN LARGE IGNEOUS PROVINCE	LITHOS	HUANG, HU; DU, YUAN-SHENG; YANG, JIANG-HAI; ZHOU, LIAN; HU, LI-SHA; HUANG, HONG-WEI; HUANG, ZHI-QIANG		23.38	105.8	0.01				XRF	SEDIMENTARY			MUDSTONE		45.84	2.64	17.76			12.38			0.13	3.52	3.5	3.61	2.96	0.4
PNT51		GEOROC	10.1016/j.lithos.2014.09.022	ORIGIN OF PERMIAN BASALTS AND CLASTIC ROCKS IN NAPO, SOUTHWEST CHINA: IMPLICATIONS FOR THE EROSION AND ERUPTION OF THE EMEISHAN LARGE IGNEOUS PROVINCE	LITHOS	HUANG, HU; DU, YUAN-SHENG; YANG, JIANG-HAI; ZHOU, LIAN; HU, LI-SHA; HUANG, HONG-WEI; HUANG, ZHI-QIANG		23.38	105.8	0.01				IGN	SEDIMENTARY			MUDSTONE																	7.22
PNT51		GEOROC	10.1016/j.lithos.2014.09.022	ORIGIN OF PERMIAN BASALTS AND CLASTIC ROCKS IN NAPO, SOUTHWEST CHINA: IMPLICATIONS FOR THE EROSION AND ERUPTION OF THE EMEISHAN LARGE IGNEOUS PROVINCE	LITHOS	HUANG, HU; DU, YUAN-SHENG; YANG, JIANG-HAI; ZHOU, LIAN; HU, LI-SHA; HUANG, HONG-WEI; HUANG, ZHI-QIANG		23.38	105.8	0.01				ICPMS	SEDIMENTARY			MUDSTONE
125-779A-05R-3,054-056		GEOROC	10.1029/2004GC000708	LITHIUM ABUNDANCE AND ISOTOPE SYSTEMATICS OF FOREARC SERPENTINITES, CONICAL SEAMOUNT, MARIANA FOREARC: INSIGHTS INTO THE MECHANICS OF SLAB-MANTLE EXCHANGE DURING SUBDUCTION	GEOCHEMISTRY GEOPHYSICS GEOSYSTEMS	BENTON, L. D.; RYAN, J. G.; SAVOV, I. P.		19.5125	146.696	0.0001				NOT	SEDIMENTARY			MUD
125-779A-13R-1,138-140		GEOROC	10.1029/2004GC000708	LITHIUM ABUNDANCE AND ISOTOPE SYSTEMATICS OF FOREARC SERPENTINITES, CONICAL SEAMOUNT, MARIANA FOREARC: INSIGHTS INTO THE MECHANICS OF SLAB-MANTLE EXCHANGE DURING SUBDUCTION	GEOCHEMISTRY GEOPHYSICS GEOSYSTEMS	BENTON, L. D.; RYAN, J. G.; SAVOV, I. P.		19.5125	146.696	0.0001				NOT	SEDIMENTARY			MUD
125-779A-18R-2,087-089		GEOROC	10.1029/2004GC000708	LITHIUM ABUNDANCE AND ISOTOPE SYSTEMATICS OF FOREARC SERPENTINITES, CONICAL SEAMOUNT, MARIANA FOREARC: INSIGHTS INTO THE MECHANICS OF SLAB-MANTLE EXCHANGE DURING SUBDUCTION	GEOCHEMISTRY GEOPHYSICS GEOSYSTEMS	BENTON, L. D.; RYAN, J. G.; SAVOV, I. P.		19.5125	146.696	0.0001				NOT	SEDIMENTARY			MUD
125-779A-28R-2,112-114		GEOROC	10.1029/2004GC000708	LITHIUM ABUNDANCE AND ISOTOPE SYSTEMATICS OF FOREARC SERPENTINITES, CONICAL SEAMOUNT, MARIANA FOREARC: INSIGHTS INTO THE MECHANICS OF SLAB-MANTLE EXCHANGE DURING SUBDUCTION	GEOCHEMISTRY GEOPHYSICS GEOSYSTEMS	BENTON, L. D.; RYAN, J. G.; SAVOV, I. P.		19.5125	146.696	0.0001				NOT	SEDIMENTARY			MUD
125-779A-32R-2,000-010		GEOROC	10.1029/2004GC000708	LITHIUM ABUNDANCE AND ISOTOPE SYSTEMATICS OF FOREARC SERPENTINITES, CONICAL SEAMOUNT, MARIANA FOREARC: INSIGHTS INTO THE MECHANICS OF SLAB-MANTLE EXCHANGE DURING SUBDUCTION	GEOCHEMISTRY GEOPHYSICS GEOSYSTEMS	BENTON, L. D.; RYAN, J. G.; SAVOV, I. P.		19.5125	146.696	0.0001				NOT	SEDIMENTARY			MUD
125-779A-36R-2,132-134		GEOROC	10.1029/2004GC000708	LITHIUM ABUNDANCE AND ISOTOPE SYSTEMATICS OF FOREARC SERPENTINITES, CONICAL SEAMOUNT, MARIANA FOREARC: INSIGHTS INTO THE MECHANICS OF SLAB-MANTLE EXCHANGE DURING SUBDUCTION	GEOCHEMISTRY GEOPHYSICS GEOSYSTEMS	BENTON, L. D.; RYAN, J. G.; SAVOV, I. P.		19.5125	146.696	0.0001				NOT	SEDIMENTARY			MUD
125-779B-01R-1,117-119		GEOROC	10.1029/2004GC000708	LITHIUM ABUNDANCE AND ISOTOPE SYSTEMATICS OF FOREARC SERPENTINITES, CONICAL SEAMOUNT, MARIANA FOREARC: INSIGHTS INTO THE MECHANICS OF SLAB-MANTLE EXCHANGE DURING SUBDUCTION	GEOCHEMISTRY GEOPHYSICS GEOSYSTEMS	BENTON, L. D.; RYAN, J. G.; SAVOV, I. P.		19.5125	146.696	0.0001				NOT	SEDIMENTARY			MUD
125-780C-02R-1,002-004		GEOROC	10.1029/2004GC000708	LITHIUM ABUNDANCE AND ISOTOPE SYSTEMATICS OF FOREARC SERPENTINITES, CONICAL SEAMOUNT, MARIANA FOREARC: INSIGHTS INTO THE MECHANICS OF SLAB-MANTLE EXCHANGE DURING SUBDUCTION	GEOCHEMISTRY GEOPHYSICS GEOSYSTEMS	BENTON, L. D.; RYAN, J. G.; SAVOV, I. P.		19.5422	146.654	0.0001				NOT	SEDIMENTARY			MUD
125-780C-04R-1,024-026		GEOROC	10.1029/2004GC000708	LITHIUM ABUNDANCE AND ISOTOPE SYSTEMATICS OF FOREARC SERPENTINITES, CONICAL SEAMOUNT, MARIANA FOREARC: INSIGHTS INTO THE MECHANICS OF SLAB-MANTLE EXCHANGE DURING SUBDUCTION	GEOCHEMISTRY GEOPHYSICS GEOSYSTEMS	BENTON, L. D.; RYAN, J. G.; SAVOV, I. P.		19.5422	146.654	0.0001				NOT	SEDIMENTARY			MUD
125-780C-05R-1,037-039		GEOROC	10.1029/2004GC000708	LITHIUM ABUNDANCE AND ISOTOPE SYSTEMATICS OF FOREARC SERPENTINITES, CONICAL SEAMOUNT, MARIANA FOREARC: INSIGHTS INTO THE MECHANICS OF SLAB-MANTLE EXCHANGE DURING SUBDUCTION	GEOCHEMISTRY GEOPHYSICS GEOSYSTEMS	BENTON, L. D.; RYAN, J. G.; SAVOV, I. P.		19.5422	146.654	0.0001				NOT	SEDIMENTARY			MUD
125-780C-07R-1,014-017		GEOROC	10.1029/2004GC000708	LITHIUM ABUNDANCE AND ISOTOPE SYSTEMATICS OF FOREARC SERPENTINITES, CONICAL SEAMOUNT, MARIANA FOREARC: INSIGHTS INTO THE MECHANICS OF SLAB-MANTLE EXCHANGE DURING SUBDUCTION	GEOCHEMISTRY GEOPHYSICS GEOSYSTEMS	BENTON, L. D.; RYAN, J. G.; SAVOV, I. P.		19.5422	146.654	0.0001				NOT	SEDIMENTARY			MUD
125-780C-12R-1,006-008		GEOROC	10.1029/2004GC000708	LITHIUM ABUNDANCE AND ISOTOPE SYSTEMATICS OF FOREARC SERPENTINITES, CONICAL SEAMOUNT, MARIANA FOREARC: INSIGHTS INTO THE MECHANICS OF SLAB-MANTLE EXCHANGE DURING SUBDUCTION	GEOCHEMISTRY GEOPHYSICS GEOSYSTEMS	BENTON, L. D.; RYAN, J. G.; SAVOV, I. P.		19.5422	146.654	0.0001				NOT	SEDIMENTARY			MUD
125-780C-13R-1,053-055		GEOROC	10.1029/2004GC000708	LITHIUM ABUNDANCE AND ISOTOPE SYSTEMATICS OF FOREARC SERPENTINITES, CONICAL SEAMOUNT, MARIANA FOREARC: INSIGHTS INTO THE MECHANICS OF SLAB-MANTLE EXCHANGE DURING SUBDUCTION	GEOCHEMISTRY GEOPHYSICS GEOSYSTEMS	BENTON, L. D.; RYAN, J. G.; SAVOV, I. P.		19.5422	146.654	0.0001				NOT	SEDIMENTARY			MUD
125-780C-15R-1,027-029		GEOROC	10.1029/2004GC000708	LITHIUM ABUNDANCE AND ISOTOPE SYSTEMATICS OF FOREARC SERPENTINITES, CONICAL SEAMOUNT, MARIANA FOREARC: INSIGHTS INTO THE MECHANICS OF SLAB-MANTLE EXCHANGE DURING SUBDUCTION	GEOCHEMISTRY GEOPHYSICS GEOSYSTEMS	BENTON, L. D.; RYAN, J. G.; SAVOV, I. P.		19.5422	146.654	0.0001				NOT	SEDIMENTARY			MUD
125-780C-16R-1,033-035		GEOROC	10.1029/2004GC000708	LITHIUM ABUNDANCE AND ISOTOPE SYSTEMATICS OF FOREARC SERPENTINITES, CONICAL SEAMOUNT, MARIANA FOREARC: INSIGHTS INTO THE MECHANICS OF SLAB-MANTLE EXCHANGE DURING SUBDUCTION	GEOCHEMISTRY GEOPHYSICS GEOSYSTEMS	BENTON, L. D.; RYAN, J. G.; SAVOV, I. P.		19.5422	146.654	0.0001				NOT	SEDIMENTARY			MUD
125-780C-18R-1,129-131		GEOROC	10.1029/2004GC000708	LITHIUM ABUNDANCE AND ISOTOPE SYSTEMATICS OF FOREARC SERPENTINITES, CONICAL SEAMOUNT, MARIANA FOREARC: INSIGHTS INTO THE MECHANICS OF SLAB-MANTLE EXCHANGE DURING SUBDUCTION	GEOCHEMISTRY GEOPHYSICS GEOSYSTEMS	BENTON, L. D.; RYAN, J. G.; SAVOV, I. P.		19.5422	146.654	0.0001				NOT	SEDIMENTARY			MUD
125-780C-18R-1,138-140		GEOROC	10.1029/2004GC000708	LITHIUM ABUNDANCE AND ISOTOPE SYSTEMATICS OF FOREARC SERPENTINITES, CONICAL SEAMOUNT, MARIANA FOREARC: INSIGHTS INTO THE MECHANICS OF SLAB-MANTLE EXCHANGE DURING SUBDUCTION	GEOCHEMISTRY GEOPHYSICS GEOSYSTEMS	BENTON, L. D.; RYAN, J. G.; SAVOV, I. P.		19.5422	146.654	0.0001				NOT	SEDIMENTARY			MUD
125-780D-01X-1,026-028		GEOROC	10.1029/2004GC000708	LITHIUM ABUNDANCE AND ISOTOPE SYSTEMATICS OF FOREARC SERPENTINITES, CONICAL SEAMOUNT, MARIANA FOREARC: INSIGHTS INTO THE MECHANICS OF SLAB-MANTLE EXCHANGE DURING SUBDUCTION	GEOCHEMISTRY GEOPHYSICS GEOSYSTEMS	BENTON, L. D.; RYAN, J. G.; SAVOV, I. P.		19.5418	146.654	0.0001				NOT	SEDIMENTARY			MUD
125-780D-02X-1,035-037		GEOROC	10.1029/2004GC000708	LITHIUM ABUNDANCE AND ISOTOPE SYSTEMATICS OF FOREARC SERPENTINITES, CONICAL SEAMOUNT, MARIANA FOREARC: INSIGHTS INTO THE MECHANICS OF SLAB-MANTLE EXCHANGE DURING SUBDUCTION	GEOCHEMISTRY GEOPHYSICS GEOSYSTEMS	BENTON, L. D.; RYAN, J. G.; SAVOV, I. P.		19.5418	146.654	0.0001				NOT	SEDIMENTARY			MUD
125-780D-06X-2,033-035		GEOROC	10.1029/2004GC000708	LITHIUM ABUNDANCE AND ISOTOPE SYSTEMATICS OF FOREARC SERPENTINITES, CONICAL SEAMOUNT, MARIANA FOREARC: INSIGHTS INTO THE MECHANICS OF SLAB-MANTLE EXCHANGE DURING SUBDUCTION	GEOCHEMISTRY GEOPHYSICS GEOSYSTEMS	BENTON, L. D.; RYAN, J. G.; SAVOV, I. P.		19.5418	146.654	0.0001				NOT	SEDIMENTARY			MUD
125-780D-07X-5,123-125		GEOROC	10.1029/2004GC000708	LITHIUM ABUNDANCE AND ISOTOPE SYSTEMATICS OF FOREARC SERPENTINITES, CONICAL SEAMOUNT, MARIANA FOREARC: INSIGHTS INTO THE MECHANICS OF SLAB-MANTLE EXCHANGE DURING SUBDUCTION	GEOCHEMISTRY GEOPHYSICS GEOSYSTEMS	BENTON, L. D.; RYAN, J. G.; SAVOV, I. P.		19.5418	146.654	0.0001				NOT	SEDIMENTARY			MUD
AC776		USGS		Geochemistry of rock samples from the National Geochemical Database: U.S. Geological Survey, Reston, VA.	U.S. Geological Survey	USGS		18.0703	-67.0167	0.01				AAS	SEDIMENTARY	UNKNOWN	UNKNOWN	MUDSTONE																													48		0.4
AC776		USGS		Geochemistry of rock samples from the National Geochemical Database: U.S. Geological Survey, Reston, VA.	U.S. Geological Survey	USGS		18.0703	-67.0167	0.01				ES	SEDIMENTARY	UNKNOWN	UNKNOWN	MUDSTONE																							1	200	30		20				0.5
AC786		USGS		Geochemistry of rock samples from the National Geochemical Database: U.S. Geological Survey, Reston, VA.	U.S. Geological Survey	USGS		18.0725	-67.025	0.01				AAS	SEDIMENTARY	UNKNOWN	UNKNOWN	MUDSTONE																													48		3.5
AC786		USGS		Geochemistry of rock samples from the National Geochemical Database: U.S. Geological Survey, Reston, VA.	U.S. Geological Survey	USGS		18.0725	-67.025	0.01				ES	SEDIMENTARY	UNKNOWN	UNKNOWN	MUDSTONE																							1.5	1000	70	5	30
AC807		USGS		Geochemistry of rock samples from the National Geochemical Database: U.S. Geological Survey, Reston, VA.	U.S. Geological Survey	USGS		18.0064	-67.0964	0.01				AAS	SEDIMENTARY	UNKNOWN	UNKNOWN	MUDSTONE																													58		4.4
AC807		USGS		Geochemistry of rock samples from the National Geochemical Database: U.S. Geological Survey, Reston, VA.	U.S. Geological Survey	USGS		18.0064	-67.0964	0.01				ES	SEDIMENTARY	UNKNOWN	UNKNOWN	MUDSTONE																							1.5	300			15000				3
AD649		USGS		Geochemistry of rock samples from the National Geochemical Database: U.S. Geological Survey, Reston, VA.	U.S. Geological Survey	USGS		17.9942	-67.1958	0.01				AAS	SEDIMENTARY	UNKNOWN	UNKNOWN	MUDSTONE																													78
AD649		USGS		Geochemistry of rock samples from the National Geochemical Database: U.S. Geological Survey, Reston, VA.	U.S. Geological Survey	USGS		17.9942	-67.1958	0.01				ES	SEDIMENTARY	UNKNOWN	UNKNOWN	MUDSTONE																							5	500	700	30	70
AD801		USGS		Geochemistry of rock samples from the National Geochemical Database: U.S. Geological Survey, Reston, VA.	U.S. Geological Survey	USGS		17.9936	-67.0972	0.01				AAS	SEDIMENTARY	UNKNOWN	UNKNOWN	MUDSTONE																													16
AD801		USGS		Geochemistry of rock samples from the National Geochemical Database: U.S. Geological Survey, Reston, VA.	U.S. Geological Survey	USGS		17.9936	-67.0972	0.01				ES	SEDIMENTARY	UNKNOWN	UNKNOWN	MUDSTONE																							7	300	100	5	150
AD822		USGS		Geochemistry of rock samples from the National Geochemical Database: U.S. Geological Survey, Reston, VA.	U.S. Geological Survey	USGS		17.9958	-67.0531	0.01				AAS	SEDIMENTARY	UNKNOWN	UNKNOWN	MUDSTONE																													23
AD822		USGS		Geochemistry of rock samples from the National Geochemical Database: U.S. Geological Survey, Reston, VA.	U.S. Geological Survey	USGS		17.9958	-67.0531	0.01				COL	SEDIMENTARY	UNKNOWN	UNKNOWN	MUDSTONE																														40
AD822		USGS		Geochemistry of rock samples from the National Geochemical Database: U.S. Geological Survey, Reston, VA.	U.S. Geological Survey	USGS		17.9958	-67.0531	0.01				ES	SEDIMENTARY	UNKNOWN	UNKNOWN	MUDSTONE																								300	150	20	50
AD849		USGS		Geochemistry of rock samples from the National Geochemical Database: U.S. Geological Survey, Reston, VA.	U.S. Geological Survey	USGS		17.9717	-67.0175	0.01				AAS	SEDIMENTARY	UNKNOWN	UNKNOWN	MUDSTONE																													48
AD849		USGS		Geochemistry of rock samples from the National Geochemical Database: U.S. Geological Survey, Reston, VA.	U.S. Geological Survey	USGS		17.9717	-67.0175	0.01				ES	SEDIMENTARY	UNKNOWN	UNKNOWN	MUDSTONE																							2	3000		5	15
AE825		USGS		Geochemistry of rock samples from the National Geochemical Database: U.S. Geological Survey, Reston, VA.	U.S. Geological Survey	USGS		18.0025	-67.0825	0.01				AAS	SEDIMENTARY	UNKNOWN	UNKNOWN	MUDSTONE																													35
AE825		USGS		Geochemistry of rock samples from the National Geochemical Database: U.S. Geological Survey, Reston, VA.	U.S. Geological Survey	USGS		18.0025	-67.0825	0.01				ES	SEDIMENTARY	UNKNOWN	UNKNOWN	MUDSTONE																							1.5	200	15		70
AE826		USGS		Geochemistry of rock samples from the National Geochemical Database: U.S. Geological Survey, Reston, VA.	U.S. Geological Survey	USGS		18.0025	-67.0825	0.01				AAS	SEDIMENTARY	UNKNOWN	UNKNOWN	MUDSTONE																													45
AE826		USGS		Geochemistry of rock samples from the National Geochemical Database: U.S. Geological Survey, Reston, VA.	U.S. Geological Survey	USGS		18.0025	-67.0825	0.01				ES	SEDIMENTARY	UNKNOWN	UNKNOWN	MUDSTONE																							3		300	15	500
AE944		USGS		Geochemistry of rock samples from the National Geochemical Database: U.S. Geological Survey, Reston, VA.	U.S. Geological Survey	USGS		18.055	-67.0125	0.01				AAS	SEDIMENTARY	UNKNOWN	UNKNOWN	MUDSTONE																													53
AE944		USGS		Geochemistry of rock samples from the National Geochemical Database: U.S. Geological Survey, Reston, VA.	U.S. Geological Survey	USGS		18.055	-67.0125	0.01				ES	SEDIMENTARY	UNKNOWN	UNKNOWN	MUDSTONE																							7	1500	70	30	150
AE953		USGS		Geochemistry of rock samples from the National Geochemical Database: U.S. Geological Survey, Reston, VA.	U.S. Geological Survey	USGS		18.0483	-67.01	0.01				AAS	SEDIMENTARY	UNKNOWN	UNKNOWN	MUDSTONE																													34
AE953		USGS		Geochemistry of rock samples from the National Geochemical Database: U.S. Geological Survey, Reston, VA.	U.S. Geological Survey	USGS		18.0483	-67.01	0.01				ES	SEDIMENTARY	UNKNOWN	UNKNOWN	MUDSTONE																							7	1500		20	30
AE962		USGS		Geochemistry of rock samples from the National Geochemical Database: U.S. Geological Survey, Reston, VA.	U.S. Geological Survey	USGS		18.0608	-67.0133	0.01				AAS	SEDIMENTARY	UNKNOWN	UNKNOWN	MUDSTONE																													500
AE962		USGS		Geochemistry of rock samples from the National Geochemical Database: U.S. Geological Survey, Reston, VA.	U.S. Geological Survey	USGS		18.0608	-67.0133	0.01				ES	SEDIMENTARY	UNKNOWN	UNKNOWN	MUDSTONE																							7		50	10	150		700
AE969		USGS		Geochemistry of rock samples from the National Geochemical Database: U.S. Geological Survey, Reston, VA.	U.S. Geological Survey	USGS		18.0742	-67.0742	0.01				AAS	SEDIMENTARY	UNKNOWN	UNKNOWN	MUDSTONE																													4
AE969		USGS		Geochemistry of rock samples from the National Geochemical Database: U.S. Geological Survey, Reston, VA.	U.S. Geological Survey	USGS		18.0742	-67.0742	0.01				ES	SEDIMENTARY	UNKNOWN	UNKNOWN	MUDSTONE																							5	100	5		150
AF056		USGS		Geochemistry of rock samples from the National Geochemical Database: U.S. Geological Survey, Reston, VA.	U.S. Geological Survey	USGS		18.0975	-66.9458	0.01				AAS	SEDIMENTARY	UNKNOWN	UNKNOWN	MUDSTONE																													27
AF056		USGS		Geochemistry of rock samples from the National Geochemical Database: U.S. Geological Survey, Reston, VA.	U.S. Geological Survey	USGS		18.0975	-66.9458	0.01				COL	SEDIMENTARY	UNKNOWN	UNKNOWN	MUDSTONE																														80
AF056		USGS		Geochemistry of rock samples from the National Geochemical Database: U.S. Geological Survey, Reston, VA.	U.S. Geological Survey	USGS		18.0975	-66.9458	0.01				ES	SEDIMENTARY	UNKNOWN	UNKNOWN	MUDSTONE																							7	500	2000	50	70
AF501		USGS		Geochemistry of rock samples from the National Geochemical Database: U.S. Geological Survey, Reston, VA.	U.S. Geological Survey	USGS		18.0967	-67.0139	0.01				AAS	SEDIMENTARY	UNKNOWN	UNKNOWN	MUDSTONE																													10
AF501		USGS		Geochemistry of rock samples from the National Geochemical Database: U.S. Geological Survey, Reston, VA.	U.S. Geological Survey	USGS		18.0967	-67.0139	0.01				ES	SEDIMENTARY	UNKNOWN	UNKNOWN	MUDSTONE																							1	150	30	10	15
AF510		USGS		Geochemistry of rock samples from the National Geochemical Database: U.S. Geological Survey, Reston, VA.	U.S. Geological Survey	USGS		18.1039	-67.0119	0.01				AAS	SEDIMENTARY	UNKNOWN	UNKNOWN	MUDSTONE																													33
AF510		USGS		Geochemistry of rock samples from the National Geochemical Database: U.S. Geological Survey, Reston, VA.	U.S. Geological Survey	USGS		18.1039	-67.0119	0.01				ES	SEDIMENTARY	UNKNOWN	UNKNOWN	MUDSTONE																							5	2000	100	15	150
AF586		USGS		Geochemistry of rock samples from the National Geochemical Database: U.S. Geological Survey, Reston, VA.	U.S. Geological Survey	USGS		18.11	-67.0486	0.01				AAS	SEDIMENTARY	UNKNOWN	UNKNOWN	MUDSTONE																													55
AF586		USGS		Geochemistry of rock samples from the National Geochemical Database: U.S. Geological Survey, Reston, VA.	U.S. Geological Survey	USGS		18.11	-67.0486	0.01				COL	SEDIMENTARY	UNKNOWN	UNKNOWN	MUDSTONE																														40
AF586		USGS		Geochemistry of rock samples from the National Geochemical Database: U.S. Geological Survey, Reston, VA.	U.S. Geological Survey	USGS		18.11	-67.0486	0.01				ES	SEDIMENTARY	UNKNOWN	UNKNOWN	MUDSTONE																							5	300	30	15	150
AF653		USGS		Geochemistry of rock samples from the National Geochemical Database: U.S. Geological Survey, Reston, VA.	U.S. Geological Survey	USGS		18.0883	-67.0053	0.01				AAS	SEDIMENTARY	UNKNOWN	UNKNOWN	MUDSTONE																													47
AF653		USGS		Geochemistry of rock samples from the National Geochemical Database: U.S. Geological Survey, Reston, VA.	U.S. Geological Survey	USGS		18.0883	-67.0053	0.01				ES	SEDIMENTARY	UNKNOWN	UNKNOWN	MUDSTONE																							3	700	1000	30	15
AFY199		USGS		Geochemistry of rock samples from the National Geochemical Database: U.S. Geological Survey, Reston, VA.	U.S. Geological Survey	USGS		35.7033	-80.0644	0.01	69	69	69	AAS	SEDIMENTARY	UNKNOWN	UNKNOWN	MUDSTONE																											30
AFY199		USGS		Geochemistry of rock samples from the National Geochemical Database: U.S. Geological Survey, Reston, VA.	U.S. Geological Survey	USGS		35.7033	-80.0644	0.01	69	69	69	ES	SEDIMENTARY	UNKNOWN	UNKNOWN	MUDSTONE																							7	300	5	5	30
AFY636		USGS		Geochemistry of rock samples from the National Geochemical Database: U.S. Geological Survey, Reston, VA.	U.S. Geological Survey	USGS		35.5731	-80.3131	0.01	69	69	69	AAS	SEDIMENTARY	UNKNOWN	UNKNOWN	MUDSTONE																											45
AFY636		USGS		Geochemistry of rock samples from the National Geochemical Database: U.S. Geological Survey, Reston, VA.	U.S. Geological Survey	USGS		35.5731	-80.3131	0.01	69	69	69	ES	SEDIMENTARY	UNKNOWN	UNKNOWN	MUDSTONE																							15	700	150	70	100
AFY637		USGS		Geochemistry of rock samples from the National Geochemical Database: U.S. Geological Survey, Reston, VA.	U.S. Geological Survey	USGS		35.5733	-80.3136	0.01	69	69	69	AAS	SEDIMENTARY	UNKNOWN	UNKNOWN	MUDSTONE																											25
AFY637		USGS		Geochemistry of rock samples from the National Geochemical Database: U.S. Geological Survey, Reston, VA.	U.S. Geological Survey	USGS		35.5733	-80.3136	0.01	69	69	69	ES	SEDIMENTARY	UNKNOWN	UNKNOWN	MUDSTONE																							10	700	20	20	20
BCO394		USGS		Geochemistry of rock samples from the National Geochemical Database: U.S. Geological Survey, Reston, VA.	U.S. Geological Survey	USGS		37.7878	-107.8	0.01	56	56	56	AAS	SEDIMENTARY	UNKNOWN	UNKNOWN	MUDSTONE																											10		20		0.4
BCO394		USGS		Geochemistry of rock samples from the National Geochemical Database: U.S. Geological Survey, Reston, VA.	U.S. Geological Survey	USGS		37.7878	-107.8	0.01	56	56	56	COL	SEDIMENTARY	UNKNOWN	UNKNOWN	MUDSTONE																														10
BCO394		USGS		Geochemistry of rock samples from the National Geochemical Database: U.S. Geological Survey, Reston, VA.	U.S. Geological Survey	USGS		37.7878	-107.8	0.01	56	56	56	ES	SEDIMENTARY	UNKNOWN	UNKNOWN	MUDSTONE																							1	100	7	7	5
BCO401		USGS		Geochemistry of rock samples from the National Geochemical Database: U.S. Geological Survey, Reston, VA.	U.S. Geological Survey	USGS		37.78	-107.798	0.01	56	56	56	AAS	SEDIMENTARY	UNKNOWN	UNKNOWN	MUDSTONE																											10		10
BCO401		USGS		Geochemistry of rock samples from the National Geochemical Database: U.S. Geological Survey, Reston, VA.	U.S. Geological Survey	USGS		37.78	-107.798	0.01	56	56	56	COL	SEDIMENTARY	UNKNOWN	UNKNOWN	MUDSTONE
BCO401		USGS		Geochemistry of rock samples from the National Geochemical Database: U.S. Geological Survey, Reston, VA.	U.S. Geological Survey	USGS		37.78	-107.798	0.01	56	56	56	ES	SEDIMENTARY	UNKNOWN	UNKNOWN	MUDSTONE																							1.5	50	7	5	7
BCO423		USGS		Geochemistry of rock samples from the National Geochemical Database: U.S. Geological Survey, Reston, VA.	U.S. Geological Survey	USGS		37.7544	-107.805	0.01	56	56	56	AAS	SEDIMENTARY	UNKNOWN	UNKNOWN	MUDSTONE																											10		160		6
BCO423		USGS		Geochemistry of rock samples from the National Geochemical Database: U.S. Geological Survey, Reston, VA.	U.S. Geological Survey	USGS		37.7544	-107.805	0.01	56	56	56	COL	SEDIMENTARY	UNKNOWN	UNKNOWN	MUDSTONE																														80
BCO423		USGS		Geochemistry of rock samples from the National Geochemical Database: U.S. Geological Survey, Reston, VA.	U.S. Geological Survey	USGS		37.7544	-107.805	0.01	56	56	56	ES	SEDIMENTARY	UNKNOWN	UNKNOWN	MUDSTONE																							0.5	70	5		5				2
BCO463		USGS		Geochemistry of rock samples from the National Geochemical Database: U.S. Geological Survey, Reston, VA.	U.S. Geological Survey	USGS		37.8381	-107.804	0.01				AAS	SEDIMENTARY	UNKNOWN	UNKNOWN	MUDSTONE																											15		55		2
BCO463		USGS		Geochemistry of rock samples from the National Geochemical Database: U.S. Geological Survey, Reston, VA.	U.S. Geological Survey	USGS		37.8381	-107.804	0.01				COL	SEDIMENTARY	UNKNOWN	UNKNOWN	MUDSTONE																														10
BCO463		USGS		Geochemistry of rock samples from the National Geochemical Database: U.S. Geological Survey, Reston, VA.	U.S. Geological Survey	USGS		37.8381	-107.804	0.01				ES	SEDIMENTARY	UNKNOWN	UNKNOWN	MUDSTONE																							3	1000	20	7	30
BCO467		USGS		Geochemistry of rock samples from the National Geochemical Database: U.S. Geological Survey, Reston, VA.	U.S. Geological Survey	USGS		37.8386	-107.804	0.01				AAS	SEDIMENTARY	UNKNOWN	UNKNOWN	MUDSTONE																											5		60
BCO467		USGS		Geochemistry of rock samples from the National Geochemical Database: U.S. Geological Survey, Reston, VA.	U.S. Geological Survey	USGS		37.8386	-107.804	0.01				COL	SEDIMENTARY	UNKNOWN	UNKNOWN	MUDSTONE
BCO467		USGS		Geochemistry of rock samples from the National Geochemical Database: U.S. Geological Survey, Reston, VA.	U.S. Geological Survey	USGS		37.8386	-107.804	0.01				ES	SEDIMENTARY	UNKNOWN	UNKNOWN	MUDSTONE																							2	500	30	15	5
BCO484		USGS		Geochemistry of rock samples from the National Geochemical Database: U.S. Geological Survey, Reston, VA.	U.S. Geological Survey	USGS		37.8528	-107.823	0.01	71	71	71	AAS	SEDIMENTARY	UNKNOWN	UNKNOWN	MUDSTONE																											100		210
BCO484		USGS		Geochemistry of rock samples from the National Geochemical Database: U.S. Geological Survey, Reston, VA.	U.S. Geological Survey	USGS		37.8528	-107.823	0.01	71	71	71	COL	SEDIMENTARY	UNKNOWN	UNKNOWN	MUDSTONE																														10
BCO484		USGS		Geochemistry of rock samples from the National Geochemical Database: U.S. Geological Survey, Reston, VA.	U.S. Geological Survey	USGS		37.8528	-107.823	0.01	71	71	71	ES	SEDIMENTARY	UNKNOWN	UNKNOWN	MUDSTONE																							1	100	5	7	30
BCO513		USGS		Geochemistry of rock samples from the National Geochemical Database: U.S. Geological Survey, Reston, VA.	U.S. Geological Survey	USGS		37.8486	-107.826	0.01				AAS	SEDIMENTARY	UNKNOWN	UNKNOWN	MUDSTONE																											40		60
BCO513		USGS		Geochemistry of rock samples from the National Geochemical Database: U.S. Geological Survey, Reston, VA.	U.S. Geological Survey	USGS		37.8486	-107.826	0.01				COL	SEDIMENTARY	UNKNOWN	UNKNOWN	MUDSTONE																														10
BCO513		USGS		Geochemistry of rock samples from the National Geochemical Database: U.S. Geological Survey, Reston, VA.	U.S. Geological Survey	USGS		37.8486	-107.826	0.01				ES	SEDIMENTARY	UNKNOWN	UNKNOWN	MUDSTONE																							5	200	50	30	30
BCO519		USGS		Geochemistry of rock samples from the National Geochemical Database: U.S. Geological Survey, Reston, VA.	U.S. Geological Survey	USGS		37.8461	-107.824	0.01				AAS	SEDIMENTARY	UNKNOWN	UNKNOWN	MUDSTONE																											40		40		0.2
BCO519		USGS		Geochemistry of rock samples from the National Geochemical Database: U.S. Geological Survey, Reston, VA.	U.S. Geological Survey	USGS		37.8461	-107.824	0.01				COL	SEDIMENTARY	UNKNOWN	UNKNOWN	MUDSTONE
BCO519		USGS		Geochemistry of rock samples from the National Geochemical Database: U.S. Geological Survey, Reston, VA.	U.S. Geological Survey	USGS		37.8461	-107.824	0.01				ES	SEDIMENTARY	UNKNOWN	UNKNOWN	MUDSTONE																							5	300	50	30	30
BCO530		USGS		Geochemistry of rock samples from the National Geochemical Database: U.S. Geological Survey, Reston, VA.	U.S. Geological Survey	USGS		37.8506	-107.837	0.01				AAS	SEDIMENTARY	UNKNOWN	UNKNOWN	MUDSTONE																											35		40
BCO530		USGS		Geochemistry of rock samples from the National Geochemical Database: U.S. Geological Survey, Reston, VA.	U.S. Geological Survey	USGS		37.8506	-107.837	0.01				COL	SEDIMENTARY	UNKNOWN	UNKNOWN	MUDSTONE																														10
BCO530		USGS		Geochemistry of rock samples from the National Geochemical Database: U.S. Geological Survey, Reston, VA.	U.S. Geological Survey	USGS		37.8506	-107.837	0.01				ES	SEDIMENTARY	UNKNOWN	UNKNOWN	MUDSTONE																							5	1000	50	50	20
BCO545		USGS		Geochemistry of rock samples from the National Geochemical Database: U.S. Geological Survey, Reston, VA.	U.S. Geological Survey	USGS		37.8517	-107.832	0.01				AAS	SEDIMENTARY	UNKNOWN	UNKNOWN	MUDSTONE																											160		80		1.5
BCO545		USGS		Geochemistry of rock samples from the National Geochemical Database: U.S. Geological Survey, Reston, VA.	U.S. Geological Survey	USGS		37.8517	-107.832	0.01				COL	SEDIMENTARY	UNKNOWN	UNKNOWN	MUDSTONE																														10
BCO545		USGS		Geochemistry of rock samples from the National Geochemical Database: U.S. Geological Survey, Reston, VA.	U.S. Geological Survey	USGS		37.8517	-107.832	0.01				ES	SEDIMENTARY	UNKNOWN	UNKNOWN	MUDSTONE																							5	1000	70	30	150				0.5
BCO547		USGS		Geochemistry of rock samples from the National Geochemical Database: U.S. Geological Survey, Reston, VA.	U.S. Geological Survey	USGS		37.8519	-107.832	0.01				AAS	SEDIMENTARY	UNKNOWN	UNKNOWN	MUDSTONE																											180		250
BCO547		USGS		Geochemistry of rock samples from the National Geochemical Database: U.S. Geological Survey, Reston, VA.	U.S. Geological Survey	USGS		37.8519	-107.832	0.01				COL	SEDIMENTARY	UNKNOWN	UNKNOWN	MUDSTONE
BCO547		USGS		Geochemistry of rock samples from the National Geochemical Database: U.S. Geological Survey, Reston, VA.	U.S. Geological Survey	USGS		37.8519	-107.832	0.01				ES	SEDIMENTARY	UNKNOWN	UNKNOWN	MUDSTONE																							5	1500	50	5	150		300
BCO555		USGS		Geochemistry of rock samples from the National Geochemical Database: U.S. Geological Survey, Reston, VA.	U.S. Geological Survey	USGS		37.8594	-107.838	0.01				AAS	SEDIMENTARY	UNKNOWN	UNKNOWN	MUDSTONE																											25		60
BCO555		USGS		Geochemistry of rock samples from the National Geochemical Database: U.S. Geological Survey, Reston, VA.	U.S. Geological Survey	USGS		37.8594	-107.838	0.01				COL	SEDIMENTARY	UNKNOWN	UNKNOWN	MUDSTONE																														10
BCO555		USGS		Geochemistry of rock samples from the National Geochemical Database: U.S. Geological Survey, Reston, VA.	U.S. Geological Survey	USGS		37.8594	-107.838	0.01				ES	SEDIMENTARY	UNKNOWN	UNKNOWN	MUDSTONE																							5	3000	10	10	5
BCO556		USGS		Geochemistry of rock samples from the National Geochemical Database: U.S. Geological Survey, Reston, VA.	U.S. Geological Survey	USGS		37.8594	-107.838	0.01				AAS	SEDIMENTARY	UNKNOWN	UNKNOWN	MUDSTONE																											30		60
BCO556		USGS		Geochemistry of rock samples from the National Geochemical Database: U.S. Geological Survey, Reston, VA.	U.S. Geological Survey	USGS		37.8594	-107.838	0.01				COL	SEDIMENTARY	UNKNOWN	UNKNOWN	MUDSTONE
BCO556		USGS		Geochemistry of rock samples from the National Geochemical Database: U.S. Geological Survey, Reston, VA.	U.S. Geological Survey	USGS		37.8594	-107.838	0.01				ES	SEDIMENTARY	UNKNOWN	UNKNOWN	MUDSTONE																							2	500	30	10	10
BES707		USGS		Geochemistry of rock samples from the National Geochemical Database: U.S. Geological Survey, Reston, VA.	U.S. Geological Survey	USGS		38.35	-109.07	0.01	59	59	59	AAS	SEDIMENTARY	UNKNOWN	UNKNOWN	MUDSTONE
BES707		USGS		Geochemistry of rock samples from the National Geochemical Database: U.S. Geological Survey, Reston, VA.	U.S. Geological Survey	USGS		38.35	-109.07	0.01	59	59	59	ES	SEDIMENTARY	UNKNOWN	UNKNOWN	MUDSTONE																							7	500	50	15	20
BES714		USGS		Geochemistry of rock samples from the National Geochemical Database: U.S. Geological Survey, Reston, VA.	U.S. Geological Survey	USGS		38.67	-109.5	0.01	59	59	59	AAS	SEDIMENTARY	UNKNOWN	UNKNOWN	MUDSTONE
BES714		USGS		Geochemistry of rock samples from the National Geochemical Database: U.S. Geological Survey, Reston, VA.	U.S. Geological Survey	USGS		38.67	-109.5	0.01	59	59	59	ES	SEDIMENTARY	UNKNOWN	UNKNOWN	MUDSTONE																							7	150	50	10	10
BES720		USGS		Geochemistry of rock samples from the National Geochemical Database: U.S. Geological Survey, Reston, VA.	U.S. Geological Survey	USGS		38.67	-109.5	0.01	59	59	59	AAS	SEDIMENTARY	UNKNOWN	UNKNOWN	MUDSTONE
BES720		USGS		Geochemistry of rock samples from the National Geochemical Database: U.S. Geological Survey, Reston, VA.	U.S. Geological Survey	USGS		38.67	-109.5	0.01	59	59	59	ES	SEDIMENTARY	UNKNOWN	UNKNOWN	MUDSTONE																							2	700	30	10	10
BES733		USGS		Geochemistry of rock samples from the National Geochemical Database: U.S. Geological Survey, Reston, VA.	U.S. Geological Survey	USGS		37.54	-109.66	0.01	59	59	59	AAS	SEDIMENTARY	UNKNOWN	UNKNOWN	MUDSTONE
BES733		USGS		Geochemistry of rock samples from the National Geochemical Database: U.S. Geological Survey, Reston, VA.	U.S. Geological Survey	USGS		37.54	-109.66	0.01	59	59	59	ES	SEDIMENTARY	UNKNOWN	UNKNOWN	MUDSTONE																							1.5	1500	15	5	20
BES745		USGS		Geochemistry of rock samples from the National Geochemical Database: U.S. Geological Survey, Reston, VA.	U.S. Geological Survey	USGS		37.9033	-110.42	0.01	59	59	59	AAS	SEDIMENTARY	UNKNOWN	UNKNOWN	MUDSTONE
BES745		USGS		Geochemistry of rock samples from the National Geochemical Database: U.S. Geological Survey, Reston, VA.	U.S. Geological Survey	USGS		37.9033	-110.42	0.01	59	59	59	ES	SEDIMENTARY	UNKNOWN	UNKNOWN	MUDSTONE																							7	200	70	15	20
BES791		USGS		Geochemistry of rock samples from the National Geochemical Database: U.S. Geological Survey, Reston, VA.	U.S. Geological Survey	USGS		38.35	-109.07	0.01	59	59	59	AAS	SEDIMENTARY	UNKNOWN	UNKNOWN	MUDSTONE
BES791		USGS		Geochemistry of rock samples from the National Geochemical Database: U.S. Geological Survey, Reston, VA.	U.S. Geological Survey	USGS		38.35	-109.07	0.01	59	59	59	ES	SEDIMENTARY	UNKNOWN	UNKNOWN	MUDSTONE																							5	300	50	15	50
BES792		USGS		Geochemistry of rock samples from the National Geochemical Database: U.S. Geological Survey, Reston, VA.	U.S. Geological Survey	USGS		38.35	-109.07	0.01	59	59	59	AAS	SEDIMENTARY	UNKNOWN	UNKNOWN	MUDSTONE
BES792		USGS		Geochemistry of rock samples from the National Geochemical Database: U.S. Geological Survey, Reston, VA.	U.S. Geological Survey	USGS		38.35	-109.07	0.01	59	59	59	ES	SEDIMENTARY	UNKNOWN	UNKNOWN	MUDSTONE																							7	300	70	20	50
BES795		USGS		Geochemistry of rock samples from the National Geochemical Database: U.S. Geological Survey, Reston, VA.	U.S. Geological Survey	USGS		38.35	-109.07	0.01	59	59	59	AAS	SEDIMENTARY	UNKNOWN	UNKNOWN	MUDSTONE
BES795		USGS		Geochemistry of rock samples from the National Geochemical Database: U.S. Geological Survey, Reston, VA.	U.S. Geological Survey	USGS		38.35	-109.07	0.01	59	59	59	ES	SEDIMENTARY	UNKNOWN	UNKNOWN	MUDSTONE																							2	200	30	10	10
BES796		USGS		Geochemistry of rock samples from the National Geochemical Database: U.S. Geological Survey, Reston, VA.	U.S. Geological Survey	USGS		38.35	-109.07	0.01	59	59	59	AAS	SEDIMENTARY	UNKNOWN	UNKNOWN	MUDSTONE
BES796		USGS		Geochemistry of rock samples from the National Geochemical Database: U.S. Geological Survey, Reston, VA.	U.S. Geological Survey	USGS		38.35	-109.07	0.01	59	59	59	ES	SEDIMENTARY	UNKNOWN	UNKNOWN	MUDSTONE																							2	300	20		20
BES797		USGS		Geochemistry of rock samples from the National Geochemical Database: U.S. Geological Survey, Reston, VA.	U.S. Geological Survey	USGS		38.35	-109.07	0.01	59	59	59	AAS	SEDIMENTARY	UNKNOWN	UNKNOWN	MUDSTONE
BES797		USGS		Geochemistry of rock samples from the National Geochemical Database: U.S. Geological Survey, Reston, VA.	U.S. Geological Survey	USGS		38.35	-109.07	0.01	59	59	59	ES	SEDIMENTARY	UNKNOWN	UNKNOWN	MUDSTONE																							2	100	20	10	20
BES798		USGS		Geochemistry of rock samples from the National Geochemical Database: U.S. Geological Survey, Reston, VA.	U.S. Geological Survey	USGS		38.35	-109.07	0.01	59	59	59	AAS	SEDIMENTARY	UNKNOWN	UNKNOWN	MUDSTONE
BES798		USGS		Geochemistry of rock samples from the National Geochemical Database: U.S. Geological Survey, Reston, VA.	U.S. Geological Survey	USGS		38.35	-109.07	0.01	59	59	59	ES	SEDIMENTARY	UNKNOWN	UNKNOWN	MUDSTONE																							5	200	30	10	7
BES800		USGS		Geochemistry of rock samples from the National Geochemical Database: U.S. Geological Survey, Reston, VA.	U.S. Geological Survey	USGS		38.67	-109.5	0.01	59	59	59	AAS	SEDIMENTARY	UNKNOWN	UNKNOWN	MUDSTONE
BES800		USGS		Geochemistry of rock samples from the National Geochemical Database: U.S. Geological Survey, Reston, VA.	U.S. Geological Survey	USGS		38.67	-109.5	0.01	59	59	59	ES	SEDIMENTARY	UNKNOWN	UNKNOWN	MUDSTONE																							1.5	300	20	10	10
BES801		USGS		Geochemistry of rock samples from the National Geochemical Database: U.S. Geological Survey, Reston, VA.	U.S. Geological Survey	USGS		38.67	-109.5	0.01	59	59	59	AAS	SEDIMENTARY	UNKNOWN	UNKNOWN	MUDSTONE
BES801		USGS		Geochemistry of rock samples from the National Geochemical Database: U.S. Geological Survey, Reston, VA.	U.S. Geological Survey	USGS		38.67	-109.5	0.01	59	59	59	ES	SEDIMENTARY	UNKNOWN	UNKNOWN	MUDSTONE																							3	200	30	10	10
BES802		USGS		Geochemistry of rock samples from the National Geochemical Database: U.S. Geological Survey, Reston, VA.	U.S. Geological Survey	USGS		38.01	-109.42	0.01	59	59	59	ES	SEDIMENTARY	UNKNOWN	UNKNOWN	MUDSTONE																							5	150	30	15	7
BES803		USGS		Geochemistry of rock samples from the National Geochemical Database: U.S. Geological Survey, Reston, VA.	U.S. Geological Survey	USGS		38.01	-109.42	0.01	59	59	59	ES	SEDIMENTARY	UNKNOWN	UNKNOWN	MUDSTONE																							3	70	20	10	10
BES810		USGS		Geochemistry of rock samples from the National Geochemical Database: U.S. Geological Survey, Reston, VA.	U.S. Geological Survey	USGS		38.01	-109.42	0.01	59	59	59	AAS	SEDIMENTARY	UNKNOWN	UNKNOWN	MUDSTONE
BES810		USGS		Geochemistry of rock samples from the National Geochemical Database: U.S. Geological Survey, Reston, VA.	U.S. Geological Survey	USGS		38.01	-109.42	0.01	59	59	59	ES	SEDIMENTARY	UNKNOWN	UNKNOWN	MUDSTONE																							5	200	50	10	5
BES811		USGS		Geochemistry of rock samples from the National Geochemical Database: U.S. Geological Survey, Reston, VA.	U.S. Geological Survey	USGS		37.54	-109.66	0.01	59	59	59	AAS	SEDIMENTARY	UNKNOWN	UNKNOWN	MUDSTONE
BES811		USGS		Geochemistry of rock samples from the National Geochemical Database: U.S. Geological Survey, Reston, VA.	U.S. Geological Survey	USGS		37.54	-109.66	0.01	59	59	59	ES	SEDIMENTARY	UNKNOWN	UNKNOWN	MUDSTONE																							1.5	150	5	15	10
BES812		USGS		Geochemistry of rock samples from the National Geochemical Database: U.S. Geological Survey, Reston, VA.	U.S. Geological Survey	USGS		37.54	-109.66	0.01	59	59	59	AAS	SEDIMENTARY	UNKNOWN	UNKNOWN	MUDSTONE
BES812		USGS		Geochemistry of rock samples from the National Geochemical Database: U.S. Geological Survey, Reston, VA.	U.S. Geological Survey	USGS		37.54	-109.66	0.01	59	59	59	ES	SEDIMENTARY	UNKNOWN	UNKNOWN	MUDSTONE																							2	300	30	20	20
BES821		USGS		Geochemistry of rock samples from the National Geochemical Database: U.S. Geological Survey, Reston, VA.	U.S. Geological Survey	USGS		38.68	-110.67	0.01	59	59	59	AAS	SEDIMENTARY	UNKNOWN	UNKNOWN	MUDSTONE
BES821		USGS		Geochemistry of rock samples from the National Geochemical Database: U.S. Geological Survey, Reston, VA.	U.S. Geological Survey	USGS		38.68	-110.67	0.01	59	59	59	ES	SEDIMENTARY	UNKNOWN	UNKNOWN	MUDSTONE																							1.5	300	10		20
BES824		USGS		Geochemistry of rock samples from the National Geochemical Database: U.S. Geological Survey, Reston, VA.	U.S. Geological Survey	USGS		38.68	-110.67	0.01	59	59	59	AAS	SEDIMENTARY	UNKNOWN	UNKNOWN	MUDSTONE
BES824		USGS		Geochemistry of rock samples from the National Geochemical Database: U.S. Geological Survey, Reston, VA.	U.S. Geological Survey	USGS		38.68	-110.67	0.01	59	59	59	ES	SEDIMENTARY	UNKNOWN	UNKNOWN	MUDSTONE																							5	100	30	5	10
BES825		USGS		Geochemistry of rock samples from the National Geochemical Database: U.S. Geological Survey, Reston, VA.	U.S. Geological Survey	USGS		38.68	-110.67	0.01	59	59	59	AAS	SEDIMENTARY	UNKNOWN	UNKNOWN	MUDSTONE
BES825		USGS		Geochemistry of rock samples from the National Geochemical Database: U.S. Geological Survey, Reston, VA.	U.S. Geological Survey	USGS		38.68	-110.67	0.01	59	59	59	ES	SEDIMENTARY	UNKNOWN	UNKNOWN	MUDSTONE																							1.5	500	15	5	5
BES826		USGS		Geochemistry of rock samples from the National Geochemical Database: U.S. Geological Survey, Reston, VA.	U.S. Geological Survey	USGS		38.35	-109.07	0.01	59	59	59	AAS	SEDIMENTARY	UNKNOWN	UNKNOWN	MUDSTONE
BES826		USGS		Geochemistry of rock samples from the National Geochemical Database: U.S. Geological Survey, Reston, VA.	U.S. Geological Survey	USGS		38.35	-109.07	0.01	59	59	59	ES	SEDIMENTARY	UNKNOWN	UNKNOWN	MUDSTONE																							5	500	50	10	30
BES827		USGS		Geochemistry of rock samples from the National Geochemical Database: U.S. Geological Survey, Reston, VA.	U.S. Geological Survey	USGS		38.35	-109.07	0.01				AAS	SEDIMENTARY	UNKNOWN	UNKNOWN	MUDSTONE
BES827		USGS		Geochemistry of rock samples from the National Geochemical Database: U.S. Geological Survey, Reston, VA.	U.S. Geological Survey	USGS		38.35	-109.07	0.01				ES	SEDIMENTARY	UNKNOWN	UNKNOWN	MUDSTONE																							7	300	70	15	50
BES829		USGS		Geochemistry of rock samples from the National Geochemical Database: U.S. Geological Survey, Reston, VA.	U.S. Geological Survey	USGS		38.35	-109.07	0.01				AAS	SEDIMENTARY	UNKNOWN	UNKNOWN	MUDSTONE
BES829		USGS		Geochemistry of rock samples from the National Geochemical Database: U.S. Geological Survey, Reston, VA.	U.S. Geological Survey	USGS		38.35	-109.07	0.01				ES	SEDIMENTARY	UNKNOWN	UNKNOWN	MUDSTONE																							7	150	30	10	10
BES830		USGS		Geochemistry of rock samples from the National Geochemical Database: U.S. Geological Survey, Reston, VA.	U.S. Geological Survey	USGS		38.35	-109.07	0.01				AAS	SEDIMENTARY	UNKNOWN	UNKNOWN	MUDSTONE
BES830		USGS		Geochemistry of rock samples from the National Geochemical Database: U.S. Geological Survey, Reston, VA.	U.S. Geological Survey	USGS		38.35	-109.07	0.01				ES	SEDIMENTARY	UNKNOWN	UNKNOWN	MUDSTONE																							7	700	50	20	15
BES831		USGS		Geochemistry of rock samples from the National Geochemical Database: U.S. Geological Survey, Reston, VA.	U.S. Geological Survey	USGS		38.35	-109.07	0.01				AAS	SEDIMENTARY	UNKNOWN	UNKNOWN	MUDSTONE
BES831		USGS		Geochemistry of rock samples from the National Geochemical Database: U.S. Geological Survey, Reston, VA.	U.S. Geological Survey	USGS		38.35	-109.07	0.01				ES	SEDIMENTARY	UNKNOWN	UNKNOWN	MUDSTONE																							3	150	15	5	15
BES832		USGS		Geochemistry of rock samples from the National Geochemical Database: U.S. Geological Survey, Reston, VA.	U.S. Geological Survey	USGS		38.35	-109.07	0.01				AAS	SEDIMENTARY	UNKNOWN	UNKNOWN	MUDSTONE
BES832		USGS		Geochemistry of rock samples from the National Geochemical Database: U.S. Geological Survey, Reston, VA.	U.S. Geological Survey	USGS		38.35	-109.07	0.01				ES	SEDIMENTARY	UNKNOWN	UNKNOWN	MUDSTONE																							5	300	20	10	10
BES833		USGS		Geochemistry of rock samples from the National Geochemical Database: U.S. Geological Survey, Reston, VA.	U.S. Geological Survey	USGS		38.67	-109.5	0.01				AAS	SEDIMENTARY	UNKNOWN	UNKNOWN	MUDSTONE
BES833		USGS		Geochemistry of rock samples from the National Geochemical Database: U.S. Geological Survey, Reston, VA.	U.S. Geological Survey	USGS		38.67	-109.5	0.01				ES	SEDIMENTARY	UNKNOWN	UNKNOWN	MUDSTONE																							7	300	30	10	20
BES834		USGS		Geochemistry of rock samples from the National Geochemical Database: U.S. Geological Survey, Reston, VA.	U.S. Geological Survey	USGS		38.01	-109.42	0.01				ES	SEDIMENTARY	UNKNOWN	UNKNOWN	MUDSTONE																							5	200	20	5	20
BES835		USGS		Geochemistry of rock samples from the National Geochemical Database: U.S. Geological Survey, Reston, VA.	U.S. Geological Survey	USGS		38.01	-109.42	0.01				ES	SEDIMENTARY	UNKNOWN	UNKNOWN	MUDSTONE																							2	200	20	10	5
BES836		USGS		Geochemistry of rock samples from the National Geochemical Database: U.S. Geological Survey, Reston, VA.	U.S. Geological Survey	USGS		38.01	-109.42	0.01	59	59	59	AAS	SEDIMENTARY	UNKNOWN	UNKNOWN	MUDSTONE
BES836		USGS		Geochemistry of rock samples from the National Geochemical Database: U.S. Geological Survey, Reston, VA.	U.S. Geological Survey	USGS		38.01	-109.42	0.01	59	59	59	ES	SEDIMENTARY	UNKNOWN	UNKNOWN	MUDSTONE																							5	300	50	10	10
BES837		USGS		Geochemistry of rock samples from the National Geochemical Database: U.S. Geological Survey, Reston, VA.	U.S. Geological Survey	USGS		37.54	-109.66	0.01	59	59	59	AAS	SEDIMENTARY	UNKNOWN	UNKNOWN	MUDSTONE
BES837		USGS		Geochemistry of rock samples from the National Geochemical Database: U.S. Geological Survey, Reston, VA.	U.S. Geological Survey	USGS		37.54	-109.66	0.01	59	59	59	ES	SEDIMENTARY	UNKNOWN	UNKNOWN	MUDSTONE																							1	100	15	10	15
BES838		USGS		Geochemistry of rock samples from the National Geochemical Database: U.S. Geological Survey, Reston, VA.	U.S. Geological Survey	USGS		37.54	-109.66	0.01	59	59	59	ES	SEDIMENTARY	UNKNOWN	UNKNOWN	MUDSTONE																							2	1000	30	30	50
BES839		USGS		Geochemistry of rock samples from the National Geochemical Database: U.S. Geological Survey, Reston, VA.	U.S. Geological Survey	USGS		38.68	-110.67	0.01	59	59	59	ES	SEDIMENTARY	UNKNOWN	UNKNOWN	MUDSTONE																							1.5	200	10		5
BES841		USGS		Geochemistry of rock samples from the National Geochemical Database: U.S. Geological Survey, Reston, VA.	U.S. Geological Survey	USGS		38.68	-110.67	0.01	59	59	59	AAS	SEDIMENTARY	UNKNOWN	UNKNOWN	MUDSTONE
BES841		USGS		Geochemistry of rock samples from the National Geochemical Database: U.S. Geological Survey, Reston, VA.	U.S. Geological Survey	USGS		38.68	-110.67	0.01	59	59	59	ES	SEDIMENTARY	UNKNOWN	UNKNOWN	MUDSTONE																							7	70	30	5	5
BES842		USGS		Geochemistry of rock samples from the National Geochemical Database: U.S. Geological Survey, Reston, VA.	U.S. Geological Survey	USGS		38.68	-110.67	0.01	59	59	59	AAS	SEDIMENTARY	UNKNOWN	UNKNOWN	MUDSTONE
BES842		USGS		Geochemistry of rock samples from the National Geochemical Database: U.S. Geological Survey, Reston, VA.	U.S. Geological Survey	USGS		38.68	-110.67	0.01	59	59	59	ES	SEDIMENTARY	UNKNOWN	UNKNOWN	MUDSTONE																							1	300	15		10
BHA203		USGS		Geochemistry of rock samples from the National Geochemical Database: U.S. Geological Survey, Reston, VA.	U.S. Geological Survey	USGS		35.95	-108.96	0.01	56	56	56	AAS	SEDIMENTARY	UNKNOWN	UNKNOWN	MUDSTONE																											10
BHA203		USGS		Geochemistry of rock samples from the National Geochemical Database: U.S. Geological Survey, Reston, VA.	U.S. Geological Survey	USGS		35.95	-108.96	0.01	56	56	56	ES	SEDIMENTARY	UNKNOWN	UNKNOWN	MUDSTONE																							1.5	2000		7	5
BHA204		USGS		Geochemistry of rock samples from the National Geochemical Database: U.S. Geological Survey, Reston, VA.	U.S. Geological Survey	USGS		35.95	-108.96	0.01	56	56	56	AAS	SEDIMENTARY	UNKNOWN	UNKNOWN	MUDSTONE																											10
BHA204		USGS		Geochemistry of rock samples from the National Geochemical Database: U.S. Geological Survey, Reston, VA.	U.S. Geological Survey	USGS		35.95	-108.96	0.01	56	56	56	ES	SEDIMENTARY	UNKNOWN	UNKNOWN	MUDSTONE																							0.7	300		5	7
BHA243		USGS		Geochemistry of rock samples from the National Geochemical Database: U.S. Geological Survey, Reston, VA.	U.S. Geological Survey	USGS		37.52	-108.54	0.01	56	56	56	AAS	SEDIMENTARY	UNKNOWN	UNKNOWN	MUDSTONE																											20
BHA243		USGS		Geochemistry of rock samples from the National Geochemical Database: U.S. Geological Survey, Reston, VA.	U.S. Geological Survey	USGS		37.52	-108.54	0.01	56	56	56	ES	SEDIMENTARY	UNKNOWN	UNKNOWN	MUDSTONE																							1.5	150	15	5	7
C103959		USGS		Geochemistry of rock samples from the National Geochemical Database: U.S. Geological Survey, Reston, VA.	U.S. Geological Survey	USGS		61.0469	-158.753	0.01				MISC	SEDIMENTARY	UNKNOWN	UNKNOWN	MUDSTONE																	2.61
C103959		USGS		Geochemistry of rock samples from the National Geochemical Database: U.S. Geological Survey, Reston, VA.	U.S. Geological Survey	USGS		61.0469	-158.753	0.01				TITR	SEDIMENTARY	UNKNOWN	UNKNOWN	MUDSTONE								0.8
C103959		USGS		Geochemistry of rock samples from the National Geochemical Database: U.S. Geological Survey, Reston, VA.	U.S. Geological Survey	USGS		61.0469	-158.753	0.01				XRF	SEDIMENTARY	UNKNOWN	UNKNOWN	MUDSTONE		72.6	0.26	11.4						0.27	0.56	2.36	1.92	4.8	0.17
C119047		USGS		Geochemistry of rock samples from the National Geochemical Database: U.S. Geological Survey, Reston, VA.	U.S. Geological Survey	USGS		42.8986	-111.643	0.01				AAS	SEDIMENTARY	UNKNOWN	UNKNOWN	MUDSTONE
C119048		USGS		Geochemistry of rock samples from the National Geochemical Database: U.S. Geological Survey, Reston, VA.	U.S. Geological Survey	USGS		42.8986	-111.643	0.01				AAS	SEDIMENTARY	UNKNOWN	UNKNOWN	MUDSTONE
C119049		USGS		Geochemistry of rock samples from the National Geochemical Database: U.S. Geological Survey, Reston, VA.	U.S. Geological Survey	USGS		42.8986	-111.643	0.01				AAS	SEDIMENTARY	UNKNOWN	UNKNOWN	MUDSTONE
C119050		USGS		Geochemistry of rock samples from the National Geochemical Database: U.S. Geological Survey, Reston, VA.	U.S. Geological Survey	USGS		42.8986	-111.643	0.01				AAS	SEDIMENTARY	UNKNOWN	UNKNOWN	MUDSTONE
C119051		USGS		Geochemistry of rock samples from the National Geochemical Database: U.S. Geological Survey, Reston, VA.	U.S. Geological Survey	USGS		42.8986	-111.643	0.01				AAS	SEDIMENTARY	UNKNOWN	UNKNOWN	MUDSTONE
C119052		USGS		Geochemistry of rock samples from the National Geochemical Database: U.S. Geological Survey, Reston, VA.	U.S. Geological Survey	USGS		42.8986	-111.643	0.01				AAS	SEDIMENTARY	UNKNOWN	UNKNOWN	MUDSTONE
C119053		USGS		Geochemistry of rock samples from the National Geochemical Database: U.S. Geological Survey, Reston, VA.	U.S. Geological Survey	USGS		42.8986	-111.643	0.01				AAS	SEDIMENTARY	UNKNOWN	UNKNOWN	MUDSTONE
C119055		USGS		Geochemistry of rock samples from the National Geochemical Database: U.S. Geological Survey, Reston, VA.	U.S. Geological Survey	USGS		42.8986	-111.643	0.01				AAS	SEDIMENTARY	UNKNOWN	UNKNOWN	MUDSTONE
C119056		USGS		Geochemistry of rock samples from the National Geochemical Database: U.S. Geological Survey, Reston, VA.	U.S. Geological Survey	USGS		42.8986	-111.643	0.01				AAS	SEDIMENTARY	UNKNOWN	UNKNOWN	MUDSTONE
C119058		USGS		Geochemistry of rock samples from the National Geochemical Database: U.S. Geological Survey, Reston, VA.	U.S. Geological Survey	USGS		42.8986	-111.643	0.01				AAS	SEDIMENTARY	UNKNOWN	UNKNOWN	MUDSTONE
C119060		USGS		Geochemistry of rock samples from the National Geochemical Database: U.S. Geological Survey, Reston, VA.	U.S. Geological Survey	USGS		42.8986	-111.643	0.01				AAS	SEDIMENTARY	UNKNOWN	UNKNOWN	MUDSTONE
C119061		USGS		Geochemistry of rock samples from the National Geochemical Database: U.S. Geological Survey, Reston, VA.	U.S. Geological Survey	USGS		42.8986	-111.643	0.01				AAS	SEDIMENTARY	UNKNOWN	UNKNOWN	MUDSTONE
C119064		USGS		Geochemistry of rock samples from the National Geochemical Database: U.S. Geological Survey, Reston, VA.	U.S. Geological Survey	USGS		42.8986	-111.643	0.01				AAS	SEDIMENTARY	UNKNOWN	UNKNOWN	MUDSTONE
C119066		USGS		Geochemistry of rock samples from the National Geochemical Database: U.S. Geological Survey, Reston, VA.	U.S. Geological Survey	USGS		42.8986	-111.643	0.01				AAS	SEDIMENTARY	UNKNOWN	UNKNOWN	MUDSTONE
C119068		USGS		Geochemistry of rock samples from the National Geochemical Database: U.S. Geological Survey, Reston, VA.	U.S. Geological Survey	USGS		42.8986	-111.643	0.01				AAS	SEDIMENTARY	UNKNOWN	UNKNOWN	MUDSTONE
C119070		USGS		Geochemistry of rock samples from the National Geochemical Database: U.S. Geological Survey, Reston, VA.	U.S. Geological Survey	USGS		42.8986	-111.643	0.01				AAS	SEDIMENTARY	UNKNOWN	UNKNOWN	MUDSTONE
C119073		USGS		Geochemistry of rock samples from the National Geochemical Database: U.S. Geological Survey, Reston, VA.	U.S. Geological Survey	USGS		42.8986	-111.643	0.01				AAS	SEDIMENTARY	UNKNOWN	UNKNOWN	MUDSTONE
C119075		USGS		Geochemistry of rock samples from the National Geochemical Database: U.S. Geological Survey, Reston, VA.	U.S. Geological Survey	USGS		42.8986	-111.643	0.01				AAS	SEDIMENTARY	UNKNOWN	UNKNOWN	MUDSTONE
C119081		USGS		Geochemistry of rock samples from the National Geochemical Database: U.S. Geological Survey, Reston, VA.	U.S. Geological Survey	USGS		42.8986	-111.643	0.01				AAS	SEDIMENTARY	UNKNOWN	UNKNOWN	MUDSTONE
C119087		USGS		Geochemistry of rock samples from the National Geochemical Database: U.S. Geological Survey, Reston, VA.	U.S. Geological Survey	USGS		42.8986	-111.642	0.01				AAS	SEDIMENTARY	UNKNOWN	UNKNOWN	MUDSTONE
C119091		USGS		Geochemistry of rock samples from the National Geochemical Database: U.S. Geological Survey, Reston, VA.	U.S. Geological Survey	USGS		42.8986	-111.642	0.01				AAS	SEDIMENTARY	UNKNOWN	UNKNOWN	MUDSTONE
C119092		USGS		Geochemistry of rock samples from the National Geochemical Database: U.S. Geological Survey, Reston, VA.	U.S. Geological Survey	USGS		42.8986	-111.642	0.01				AAS	SEDIMENTARY	UNKNOWN	UNKNOWN	MUDSTONE
C119098		USGS		Geochemistry of rock samples from the National Geochemical Database: U.S. Geological Survey, Reston, VA.	U.S. Geological Survey	USGS		42.8986	-111.643	0.01				AAS	SEDIMENTARY	UNKNOWN	UNKNOWN	MUDSTONE
C119102		USGS		Geochemistry of rock samples from the National Geochemical Database: U.S. Geological Survey, Reston, VA.	U.S. Geological Survey	USGS		42.8986	-111.643	0.01				AAS	SEDIMENTARY	UNKNOWN	UNKNOWN	MUDSTONE
C119103		USGS		Geochemistry of rock samples from the National Geochemical Database: U.S. Geological Survey, Reston, VA.	U.S. Geological Survey	USGS		42.8986	-111.643	0.01				AAS	SEDIMENTARY	UNKNOWN	UNKNOWN	MUDSTONE
C119104		USGS		Geochemistry of rock samples from the National Geochemical Database: U.S. Geological Survey, Reston, VA.	U.S. Geological Survey	USGS		42.8986	-111.643	0.01				AAS	SEDIMENTARY	UNKNOWN	UNKNOWN	MUDSTONE
C119109		USGS		Geochemistry of rock samples from the National Geochemical Database: U.S. Geological Survey, Reston, VA.	U.S. Geological Survey	USGS		42.8986	-111.643	0.01				AAS	SEDIMENTARY	UNKNOWN	UNKNOWN	MUDSTONE
C119110		USGS		Geochemistry of rock samples from the National Geochemical Database: U.S. Geological Survey, Reston, VA.	U.S. Geological Survey	USGS		42.8986	-111.643	0.01				AAS	SEDIMENTARY	UNKNOWN	UNKNOWN	MUDSTONE
C119112		USGS		Geochemistry of rock samples from the National Geochemical Database: U.S. Geological Survey, Reston, VA.	U.S. Geological Survey	USGS		42.8986	-111.643	0.01				AAS	SEDIMENTARY	UNKNOWN	UNKNOWN	MUDSTONE
C119114		USGS		Geochemistry of rock samples from the National Geochemical Database: U.S. Geological Survey, Reston, VA.	U.S. Geological Survey	USGS		42.8986	-111.643	0.01				AAS	SEDIMENTARY	UNKNOWN	UNKNOWN	MUDSTONE
C119115		USGS		Geochemistry of rock samples from the National Geochemical Database: U.S. Geological Survey, Reston, VA.	U.S. Geological Survey	USGS		42.8986	-111.643	0.01				AAS	SEDIMENTARY	UNKNOWN	UNKNOWN	MUDSTONE
C119116		USGS		Geochemistry of rock samples from the National Geochemical Database: U.S. Geological Survey, Reston, VA.	U.S. Geological Survey	USGS		42.8986	-111.643	0.01				AAS	SEDIMENTARY	UNKNOWN	UNKNOWN	MUDSTONE
C119117		USGS		Geochemistry of rock samples from the National Geochemical Database: U.S. Geological Survey, Reston, VA.	U.S. Geological Survey	USGS		42.8986	-111.643	0.01				AAS	SEDIMENTARY	UNKNOWN	UNKNOWN	MUDSTONE
C119118		USGS		Geochemistry of rock samples from the National Geochemical Database: U.S. Geological Survey, Reston, VA.	U.S. Geological Survey	USGS		42.8986	-111.643	0.01				AAS	SEDIMENTARY	UNKNOWN	UNKNOWN	MUDSTONE
C119119		USGS		Geochemistry of rock samples from the National Geochemical Database: U.S. Geological Survey, Reston, VA.	U.S. Geological Survey	USGS		42.8986	-111.643	0.01				AAS	SEDIMENTARY	UNKNOWN	UNKNOWN	MUDSTONE
C119122		USGS		Geochemistry of rock samples from the National Geochemical Database: U.S. Geological Survey, Reston, VA.	U.S. Geological Survey	USGS		42.8986	-111.643	0.01				AAS	SEDIMENTARY	UNKNOWN	UNKNOWN	MUDSTONE
C119123		USGS		Geochemistry of rock samples from the National Geochemical Database: U.S. Geological Survey, Reston, VA.	U.S. Geological Survey	USGS		42.8986	-111.643	0.01				AAS	SEDIMENTARY	UNKNOWN	UNKNOWN	MUDSTONE
C119124		USGS		Geochemistry of rock samples from the National Geochemical Database: U.S. Geological Survey, Reston, VA.	U.S. Geological Survey	USGS		42.8986	-111.643	0.01				AAS	SEDIMENTARY	UNKNOWN	UNKNOWN	MUDSTONE
C119125		USGS		Geochemistry of rock samples from the National Geochemical Database: U.S. Geological Survey, Reston, VA.	U.S. Geological Survey	USGS		42.8986	-111.643	0.01				AAS	SEDIMENTARY	UNKNOWN	UNKNOWN	MUDSTONE
C119130		USGS		Geochemistry of rock samples from the National Geochemical Database: U.S. Geological Survey, Reston, VA.	U.S. Geological Survey	USGS		42.8986	-111.643	0.01				AAS	SEDIMENTARY	UNKNOWN	UNKNOWN	MUDSTONE
C119131		USGS		Geochemistry of rock samples from the National Geochemical Database: U.S. Geological Survey, Reston, VA.	U.S. Geological Survey	USGS		42.8986	-111.643	0.01				AAS	SEDIMENTARY	UNKNOWN	UNKNOWN	MUDSTONE
C119136		USGS		Geochemistry of rock samples from the National Geochemical Database: U.S. Geological Survey, Reston, VA.	U.S. Geological Survey	USGS		42.8986	-111.643	0.01				AAS	SEDIMENTARY	UNKNOWN	UNKNOWN	MUDSTONE
C119137		USGS		Geochemistry of rock samples from the National Geochemical Database: U.S. Geological Survey, Reston, VA.	U.S. Geological Survey	USGS		42.8986	-111.643	0.01				AAS	SEDIMENTARY	UNKNOWN	UNKNOWN	MUDSTONE
C119138		USGS		Geochemistry of rock samples from the National Geochemical Database: U.S. Geological Survey, Reston, VA.	U.S. Geological Survey	USGS		42.8986	-111.643	0.01				AAS	SEDIMENTARY	UNKNOWN	UNKNOWN	MUDSTONE
C119139		USGS		Geochemistry of rock samples from the National Geochemical Database: U.S. Geological Survey, Reston, VA.	U.S. Geological Survey	USGS		42.8986	-111.643	0.01				AAS	SEDIMENTARY	UNKNOWN	UNKNOWN	MUDSTONE
C119140		USGS		Geochemistry of rock samples from the National Geochemical Database: U.S. Geological Survey, Reston, VA.	U.S. Geological Survey	USGS		42.8986	-111.643	0.01				AAS	SEDIMENTARY	UNKNOWN	UNKNOWN	MUDSTONE
C119142		USGS		Geochemistry of rock samples from the National Geochemical Database: U.S. Geological Survey, Reston, VA.	U.S. Geological Survey	USGS		42.8986	-111.643	0.01				AAS	SEDIMENTARY	UNKNOWN	UNKNOWN	MUDSTONE
C119145		USGS		Geochemistry of rock samples from the National Geochemical Database: U.S. Geological Survey, Reston, VA.	U.S. Geological Survey	USGS		42.8986	-111.643	0.01				AAS	SEDIMENTARY	UNKNOWN	UNKNOWN	MUDSTONE
C119147		USGS		Geochemistry of rock samples from the National Geochemical Database: U.S. Geological Survey, Reston, VA.	U.S. Geological Survey	USGS		42.8986	-111.643	0.01				AAS	SEDIMENTARY	UNKNOWN	UNKNOWN	MUDSTONE
C119152		USGS		Geochemistry of rock samples from the National Geochemical Database: U.S. Geological Survey, Reston, VA.	U.S. Geological Survey	USGS		42.8986	-111.643	0.01				AAS	SEDIMENTARY	UNKNOWN	UNKNOWN	MUDSTONE
C119153		USGS		Geochemistry of rock samples from the National Geochemical Database: U.S. Geological Survey, Reston, VA.	U.S. Geological Survey	USGS		42.8986	-111.643	0.01				AAS	SEDIMENTARY	UNKNOWN	UNKNOWN	MUDSTONE
C120401		USGS		Geochemistry of rock samples from the National Geochemical Database: U.S. Geological Survey, Reston, VA.	U.S. Geological Survey	USGS		42.8847	-111.741	0.01	71	71	71	AAS	SEDIMENTARY	UNKNOWN	UNKNOWN	MUDSTONE
C120401		USGS		Geochemistry of rock samples from the National Geochemical Database: U.S. Geological Survey, Reston, VA.	U.S. Geological Survey	USGS		42.8847	-111.741	0.01	71	71	71	ICPAES	SEDIMENTARY	UNKNOWN	UNKNOWN	MUDSTONE																						10.1	1.17		150		253	45	290
C125665		USGS		Geochemistry of rock samples from the National Geochemical Database: U.S. Geological Survey, Reston, VA.	U.S. Geological Survey	USGS		41	-116.037	0.01				AAS	SEDIMENTARY	UNKNOWN	UNKNOWN	MUDSTONE
C125665		USGS		Geochemistry of rock samples from the National Geochemical Database: U.S. Geological Survey, Reston, VA.	U.S. Geological Survey	USGS		41	-116.037	0.01				FAP	SEDIMENTARY	UNKNOWN	UNKNOWN	MUDSTONE
C125665		USGS		Geochemistry of rock samples from the National Geochemical Database: U.S. Geological Survey, Reston, VA.	U.S. Geological Survey	USGS		41	-116.037	0.01				ICPAES	SEDIMENTARY	UNKNOWN	UNKNOWN	MUDSTONE																							1.32	169	85	5	28	6	511	101
C125666		USGS		Geochemistry of rock samples from the National Geochemical Database: U.S. Geological Survey, Reston, VA.	U.S. Geological Survey	USGS		41	-116.037	0.01				AAS	SEDIMENTARY	UNKNOWN	UNKNOWN	MUDSTONE
C125666		USGS		Geochemistry of rock samples from the National Geochemical Database: U.S. Geological Survey, Reston, VA.	U.S. Geological Survey	USGS		41	-116.037	0.01				FAP	SEDIMENTARY	UNKNOWN	UNKNOWN	MUDSTONE
C125666		USGS		Geochemistry of rock samples from the National Geochemical Database: U.S. Geological Survey, Reston, VA.	U.S. Geological Survey	USGS		41	-116.037	0.01				ICPAES	SEDIMENTARY	UNKNOWN	UNKNOWN	MUDSTONE																							0.76	154	38	3	22		93	60
C125667		USGS		Geochemistry of rock samples from the National Geochemical Database: U.S. Geological Survey, Reston, VA.	U.S. Geological Survey	USGS		41	-116.037	0.01				AAS	SEDIMENTARY	UNKNOWN	UNKNOWN	MUDSTONE
C125667		USGS		Geochemistry of rock samples from the National Geochemical Database: U.S. Geological Survey, Reston, VA.	U.S. Geological Survey	USGS		41	-116.037	0.01				FAP	SEDIMENTARY	UNKNOWN	UNKNOWN	MUDSTONE
C125667		USGS		Geochemistry of rock samples from the National Geochemical Database: U.S. Geological Survey, Reston, VA.	U.S. Geological Survey	USGS		41	-116.037	0.01				ICPAES	SEDIMENTARY	UNKNOWN	UNKNOWN	MUDSTONE																							1.6	39	147	6	29	3	404	332
C125668		USGS		Geochemistry of rock samples from the National Geochemical Database: U.S. Geological Survey, Reston, VA.	U.S. Geological Survey	USGS		41	-116.037	0.01				AAS	SEDIMENTARY	UNKNOWN	UNKNOWN	MUDSTONE
C125668		USGS		Geochemistry of rock samples from the National Geochemical Database: U.S. Geological Survey, Reston, VA.	U.S. Geological Survey	USGS		41	-116.037	0.01				ICPAES	SEDIMENTARY	UNKNOWN	UNKNOWN	MUDSTONE																							1.2	221	366	4	102	48	3460	572
C125669		USGS		Geochemistry of rock samples from the National Geochemical Database: U.S. Geological Survey, Reston, VA.	U.S. Geological Survey	USGS		41	-116.037	0.01				AAS	SEDIMENTARY	UNKNOWN	UNKNOWN	MUDSTONE
C125669		USGS		Geochemistry of rock samples from the National Geochemical Database: U.S. Geological Survey, Reston, VA.	U.S. Geological Survey	USGS		41	-116.037	0.01				FAP	SEDIMENTARY	UNKNOWN	UNKNOWN	MUDSTONE
C125669		USGS		Geochemistry of rock samples from the National Geochemical Database: U.S. Geological Survey, Reston, VA.	U.S. Geological Survey	USGS		41	-116.037	0.01				ICPAES	SEDIMENTARY	UNKNOWN	UNKNOWN	MUDSTONE																							0.83	202	55	4	28	5	271	38
C125674		USGS		Geochemistry of rock samples from the National Geochemical Database: U.S. Geological Survey, Reston, VA.	U.S. Geological Survey	USGS		41	-116.037	0.01				AAS	SEDIMENTARY	UNKNOWN	UNKNOWN	MUDSTONE
C125674		USGS		Geochemistry of rock samples from the National Geochemical Database: U.S. Geological Survey, Reston, VA.	U.S. Geological Survey	USGS		41	-116.037	0.01				FAP	SEDIMENTARY	UNKNOWN	UNKNOWN	MUDSTONE
C125674		USGS		Geochemistry of rock samples from the National Geochemical Database: U.S. Geological Survey, Reston, VA.	U.S. Geological Survey	USGS		41	-116.037	0.01				ICPAES	SEDIMENTARY	UNKNOWN	UNKNOWN	MUDSTONE																							0.48	136	22	2	16		181	16
C131514		USGS		Geochemistry of rock samples from the National Geochemical Database: U.S. Geological Survey, Reston, VA.	U.S. Geological Survey	USGS		35.3728	-116.885	0.01	2	2	2	ICPAES	SEDIMENTARY	UNKNOWN	UNKNOWN	MUDSTONE																							3.85	773	33	15	36.3	0.32	103	9
C136666		USGS		Geochemistry of rock samples from the National Geochemical Database: U.S. Geological Survey, Reston, VA.	U.S. Geological Survey	USGS		42.5222	-110.431	0.01				AAS	SEDIMENTARY	UNKNOWN	UNKNOWN	MUDSTONE
C136667		USGS		Geochemistry of rock samples from the National Geochemical Database: U.S. Geological Survey, Reston, VA.	U.S. Geological Survey	USGS		42.5222	-110.431	0.01				AAS	SEDIMENTARY	UNKNOWN	UNKNOWN	MUDSTONE
C136668		USGS		Geochemistry of rock samples from the National Geochemical Database: U.S. Geological Survey, Reston, VA.	U.S. Geological Survey	USGS		42.5222	-110.431	0.01				AAS	SEDIMENTARY	UNKNOWN	UNKNOWN	MUDSTONE
C136669		USGS		Geochemistry of rock samples from the National Geochemical Database: U.S. Geological Survey, Reston, VA.	U.S. Geological Survey	USGS		42.5222	-110.431	0.01				AAS	SEDIMENTARY	UNKNOWN	UNKNOWN	MUDSTONE
C136670		USGS		Geochemistry of rock samples from the National Geochemical Database: U.S. Geological Survey, Reston, VA.	U.S. Geological Survey	USGS		42.5222	-110.431	0.01				AAS	SEDIMENTARY	UNKNOWN	UNKNOWN	MUDSTONE
C136671		USGS		Geochemistry of rock samples from the National Geochemical Database: U.S. Geological Survey, Reston, VA.	U.S. Geological Survey	USGS		42.5222	-110.431	0.01				AAS	SEDIMENTARY	UNKNOWN	UNKNOWN	MUDSTONE
C136672		USGS		Geochemistry of rock samples from the National Geochemical Database: U.S. Geological Survey, Reston, VA.	U.S. Geological Survey	USGS		42.5222	-110.431	0.01				AAS	SEDIMENTARY	UNKNOWN	UNKNOWN	MUDSTONE
C136673		USGS		Geochemistry of rock samples from the National Geochemical Database: U.S. Geological Survey, Reston, VA.	U.S. Geological Survey	USGS		42.5222	-110.431	0.01				AAS	SEDIMENTARY	UNKNOWN	UNKNOWN	MUDSTONE
C136674		USGS		Geochemistry of rock samples from the National Geochemical Database: U.S. Geological Survey, Reston, VA.	U.S. Geological Survey	USGS		42.5222	-110.431	0.01				AAS	SEDIMENTARY	UNKNOWN	UNKNOWN	MUDSTONE
C136675		USGS		Geochemistry of rock samples from the National Geochemical Database: U.S. Geological Survey, Reston, VA.	U.S. Geological Survey	USGS		42.5222	-110.431	0.01				AAS	SEDIMENTARY	UNKNOWN	UNKNOWN	MUDSTONE
C136676		USGS		Geochemistry of rock samples from the National Geochemical Database: U.S. Geological Survey, Reston, VA.	U.S. Geological Survey	USGS		42.5222	-110.431	0.01				AAS	SEDIMENTARY	UNKNOWN	UNKNOWN	MUDSTONE
C136677		USGS		Geochemistry of rock samples from the National Geochemical Database: U.S. Geological Survey, Reston, VA.	U.S. Geological Survey	USGS		42.5222	-110.431	0.01				AAS	SEDIMENTARY	UNKNOWN	UNKNOWN	MUDSTONE
C136678		USGS		Geochemistry of rock samples from the National Geochemical Database: U.S. Geological Survey, Reston, VA.	U.S. Geological Survey	USGS		42.5222	-110.431	0.01				AAS	SEDIMENTARY	UNKNOWN	UNKNOWN	MUDSTONE
C136679		USGS		Geochemistry of rock samples from the National Geochemical Database: U.S. Geological Survey, Reston, VA.	U.S. Geological Survey	USGS		42.5222	-110.431	0.01				AAS	SEDIMENTARY	UNKNOWN	UNKNOWN	MUDSTONE
C136680		USGS		Geochemistry of rock samples from the National Geochemical Database: U.S. Geological Survey, Reston, VA.	U.S. Geological Survey	USGS		42.5222	-110.431	0.01				AAS	SEDIMENTARY	UNKNOWN	UNKNOWN	MUDSTONE
C136681		USGS		Geochemistry of rock samples from the National Geochemical Database: U.S. Geological Survey, Reston, VA.	U.S. Geological Survey	USGS		42.5222	-110.431	0.01				AAS	SEDIMENTARY	UNKNOWN	UNKNOWN	MUDSTONE
C136682		USGS		Geochemistry of rock samples from the National Geochemical Database: U.S. Geological Survey, Reston, VA.	U.S. Geological Survey	USGS		42.5222	-110.431	0.01				AAS	SEDIMENTARY	UNKNOWN	UNKNOWN	MUDSTONE
C136683		USGS		Geochemistry of rock samples from the National Geochemical Database: U.S. Geological Survey, Reston, VA.	U.S. Geological Survey	USGS		42.5222	-110.431	0.01				AAS	SEDIMENTARY	UNKNOWN	UNKNOWN	MUDSTONE
C136684		USGS		Geochemistry of rock samples from the National Geochemical Database: U.S. Geological Survey, Reston, VA.	U.S. Geological Survey	USGS		42.5222	-110.431	0.01				AAS	SEDIMENTARY	UNKNOWN	UNKNOWN	MUDSTONE
C136685		USGS		Geochemistry of rock samples from the National Geochemical Database: U.S. Geological Survey, Reston, VA.	U.S. Geological Survey	USGS		42.5222	-110.431	0.01				AAS	SEDIMENTARY	UNKNOWN	UNKNOWN	MUDSTONE
C136686		USGS		Geochemistry of rock samples from the National Geochemical Database: U.S. Geological Survey, Reston, VA.	U.S. Geological Survey	USGS		42.5222	-110.431	0.01				AAS	SEDIMENTARY	UNKNOWN	UNKNOWN	MUDSTONE
C136687		USGS		Geochemistry of rock samples from the National Geochemical Database: U.S. Geological Survey, Reston, VA.	U.S. Geological Survey	USGS		42.5222	-110.431	0.01				AAS	SEDIMENTARY	UNKNOWN	UNKNOWN	MUDSTONE
C136688		USGS		Geochemistry of rock samples from the National Geochemical Database: U.S. Geological Survey, Reston, VA.	U.S. Geological Survey	USGS		42.5222	-110.431	0.01				AAS	SEDIMENTARY	UNKNOWN	UNKNOWN	MUDSTONE
C136689		USGS		Geochemistry of rock samples from the National Geochemical Database: U.S. Geological Survey, Reston, VA.	U.S. Geological Survey	USGS		42.5222	-110.431	0.01				AAS	SEDIMENTARY	UNKNOWN	UNKNOWN	MUDSTONE
C136690		USGS		Geochemistry of rock samples from the National Geochemical Database: U.S. Geological Survey, Reston, VA.	U.S. Geological Survey	USGS		42.5222	-110.431	0.01				AAS	SEDIMENTARY	UNKNOWN	UNKNOWN	MUDSTONE
C136691		USGS		Geochemistry of rock samples from the National Geochemical Database: U.S. Geological Survey, Reston, VA.	U.S. Geological Survey	USGS		42.5222	-110.431	0.01				AAS	SEDIMENTARY	UNKNOWN	UNKNOWN	MUDSTONE
C136692		USGS		Geochemistry of rock samples from the National Geochemical Database: U.S. Geological Survey, Reston, VA.	U.S. Geological Survey	USGS		42.5222	-110.431	0.01				AAS	SEDIMENTARY	UNKNOWN	UNKNOWN	MUDSTONE
C136693		USGS		Geochemistry of rock samples from the National Geochemical Database: U.S. Geological Survey, Reston, VA.	U.S. Geological Survey	USGS		42.5222	-110.431	0.01				AAS	SEDIMENTARY	UNKNOWN	UNKNOWN	MUDSTONE
C136694		USGS		Geochemistry of rock samples from the National Geochemical Database: U.S. Geological Survey, Reston, VA.	U.S. Geological Survey	USGS		42.5222	-110.431	0.01				AAS	SEDIMENTARY	UNKNOWN	UNKNOWN	MUDSTONE
C136695		USGS		Geochemistry of rock samples from the National Geochemical Database: U.S. Geological Survey, Reston, VA.	U.S. Geological Survey	USGS		42.5222	-110.431	0.01				AAS	SEDIMENTARY	UNKNOWN	UNKNOWN	MUDSTONE
C136696		USGS		Geochemistry of rock samples from the National Geochemical Database: U.S. Geological Survey, Reston, VA.	U.S. Geological Survey	USGS		42.5222	-110.431	0.01				AAS	SEDIMENTARY	UNKNOWN	UNKNOWN	MUDSTONE
C136697		USGS		Geochemistry of rock samples from the National Geochemical Database: U.S. Geological Survey, Reston, VA.	U.S. Geological Survey	USGS		42.5222	-110.431	0.01				AAS	SEDIMENTARY	UNKNOWN	UNKNOWN	MUDSTONE
C136698		USGS		Geochemistry of rock samples from the National Geochemical Database: U.S. Geological Survey, Reston, VA.	U.S. Geological Survey	USGS		42.5222	-110.431	0.01				AAS	SEDIMENTARY	UNKNOWN	UNKNOWN	MUDSTONE
C136699		USGS		Geochemistry of rock samples from the National Geochemical Database: U.S. Geological Survey, Reston, VA.	U.S. Geological Survey	USGS		42.5222	-110.431	0.01				AAS	SEDIMENTARY	UNKNOWN	UNKNOWN	MUDSTONE
C136700		USGS		Geochemistry of rock samples from the National Geochemical Database: U.S. Geological Survey, Reston, VA.	U.S. Geological Survey	USGS		42.5222	-110.431	0.01				AAS	SEDIMENTARY	UNKNOWN	UNKNOWN	MUDSTONE
C136701		USGS		Geochemistry of rock samples from the National Geochemical Database: U.S. Geological Survey, Reston, VA.	U.S. Geological Survey	USGS		42.5222	-110.431	0.01				AAS	SEDIMENTARY	UNKNOWN	UNKNOWN	MUDSTONE
C136702		USGS		Geochemistry of rock samples from the National Geochemical Database: U.S. Geological Survey, Reston, VA.	U.S. Geological Survey	USGS		42.5222	-110.431	0.01				AAS	SEDIMENTARY	UNKNOWN	UNKNOWN	MUDSTONE
C136703		USGS		Geochemistry of rock samples from the National Geochemical Database: U.S. Geological Survey, Reston, VA.	U.S. Geological Survey	USGS		42.5222	-110.431	0.01				AAS	SEDIMENTARY	UNKNOWN	UNKNOWN	MUDSTONE
C136704		USGS		Geochemistry of rock samples from the National Geochemical Database: U.S. Geological Survey, Reston, VA.	U.S. Geological Survey	USGS		42.5222	-110.431	0.01				AAS	SEDIMENTARY	UNKNOWN	UNKNOWN	MUDSTONE
C136705		USGS		Geochemistry of rock samples from the National Geochemical Database: U.S. Geological Survey, Reston, VA.	U.S. Geological Survey	USGS		42.5222	-110.431	0.01				AAS	SEDIMENTARY	UNKNOWN	UNKNOWN	MUDSTONE
C136706		USGS		Geochemistry of rock samples from the National Geochemical Database: U.S. Geological Survey, Reston, VA.	U.S. Geological Survey	USGS		42.5222	-110.431	0.01				AAS	SEDIMENTARY	UNKNOWN	UNKNOWN	MUDSTONE
C136707		USGS		Geochemistry of rock samples from the National Geochemical Database: U.S. Geological Survey, Reston, VA.	U.S. Geological Survey	USGS		42.5222	-110.431	0.01				AAS	SEDIMENTARY	UNKNOWN	UNKNOWN	MUDSTONE
C136708		USGS		Geochemistry of rock samples from the National Geochemical Database: U.S. Geological Survey, Reston, VA.	U.S. Geological Survey	USGS		42.5222	-110.431	0.01				AAS	SEDIMENTARY	UNKNOWN	UNKNOWN	MUDSTONE
C136709		USGS		Geochemistry of rock samples from the National Geochemical Database: U.S. Geological Survey, Reston, VA.	U.S. Geological Survey	USGS		42.5222	-110.431	0.01				AAS	SEDIMENTARY	UNKNOWN	UNKNOWN	MUDSTONE
C136710		USGS		Geochemistry of rock samples from the National Geochemical Database: U.S. Geological Survey, Reston, VA.	U.S. Geological Survey	USGS		42.5222	-110.431	0.01				AAS	SEDIMENTARY	UNKNOWN	UNKNOWN	MUDSTONE
C136711		USGS		Geochemistry of rock samples from the National Geochemical Database: U.S. Geological Survey, Reston, VA.	U.S. Geological Survey	USGS		42.5222	-110.431	0.01				AAS	SEDIMENTARY	UNKNOWN	UNKNOWN	MUDSTONE
C136712		USGS		Geochemistry of rock samples from the National Geochemical Database: U.S. Geological Survey, Reston, VA.	U.S. Geological Survey	USGS		42.5222	-110.431	0.01				AAS	SEDIMENTARY	UNKNOWN	UNKNOWN	MUDSTONE
C136713		USGS		Geochemistry of rock samples from the National Geochemical Database: U.S. Geological Survey, Reston, VA.	U.S. Geological Survey	USGS		42.5222	-110.431	0.01				AAS	SEDIMENTARY	UNKNOWN	UNKNOWN	MUDSTONE
C136714		USGS		Geochemistry of rock samples from the National Geochemical Database: U.S. Geological Survey, Reston, VA.	U.S. Geological Survey	USGS		42.5222	-110.431	0.01				AAS	SEDIMENTARY	UNKNOWN	UNKNOWN	MUDSTONE
C136715		USGS		Geochemistry of rock samples from the National Geochemical Database: U.S. Geological Survey, Reston, VA.	U.S. Geological Survey	USGS		42.5222	-110.431	0.01				AAS	SEDIMENTARY	UNKNOWN	UNKNOWN	MUDSTONE
C136716		USGS		Geochemistry of rock samples from the National Geochemical Database: U.S. Geological Survey, Reston, VA.	U.S. Geological Survey	USGS		42.5222	-110.431	0.01				AAS	SEDIMENTARY	UNKNOWN	UNKNOWN	MUDSTONE
C136717		USGS		Geochemistry of rock samples from the National Geochemical Database: U.S. Geological Survey, Reston, VA.	U.S. Geological Survey	USGS		42.5222	-110.431	0.01				AAS	SEDIMENTARY	UNKNOWN	UNKNOWN	MUDSTONE
C136718		USGS		Geochemistry of rock samples from the National Geochemical Database: U.S. Geological Survey, Reston, VA.	U.S. Geological Survey	USGS		42.5222	-110.431	0.01				AAS	SEDIMENTARY	UNKNOWN	UNKNOWN	MUDSTONE
C136719		USGS		Geochemistry of rock samples from the National Geochemical Database: U.S. Geological Survey, Reston, VA.	U.S. Geological Survey	USGS		42.5222	-110.431	0.01				AAS	SEDIMENTARY	UNKNOWN	UNKNOWN	MUDSTONE
C136720		USGS		Geochemistry of rock samples from the National Geochemical Database: U.S. Geological Survey, Reston, VA.	U.S. Geological Survey	USGS		42.5222	-110.431	0.01				AAS	SEDIMENTARY	UNKNOWN	UNKNOWN	MUDSTONE
C136721		USGS		Geochemistry of rock samples from the National Geochemical Database: U.S. Geological Survey, Reston, VA.	U.S. Geological Survey	USGS		42.5222	-110.431	0.01				AAS	SEDIMENTARY	UNKNOWN	UNKNOWN	MUDSTONE
C136722		USGS		Geochemistry of rock samples from the National Geochemical Database: U.S. Geological Survey, Reston, VA.	U.S. Geological Survey	USGS		42.5222	-110.431	0.01				AAS	SEDIMENTARY	UNKNOWN	UNKNOWN	MUDSTONE
C136723		USGS		Geochemistry of rock samples from the National Geochemical Database: U.S. Geological Survey, Reston, VA.	U.S. Geological Survey	USGS		42.5222	-110.431	0.01				AAS	SEDIMENTARY	UNKNOWN	UNKNOWN	MUDSTONE
C136724		USGS		Geochemistry of rock samples from the National Geochemical Database: U.S. Geological Survey, Reston, VA.	U.S. Geological Survey	USGS		42.5222	-110.431	0.01				AAS	SEDIMENTARY	UNKNOWN	UNKNOWN	MUDSTONE
C136725		USGS		Geochemistry of rock samples from the National Geochemical Database: U.S. Geological Survey, Reston, VA.	U.S. Geological Survey	USGS		42.5222	-110.431	0.01				AAS	SEDIMENTARY	UNKNOWN	UNKNOWN	MUDSTONE
C136726		USGS		Geochemistry of rock samples from the National Geochemical Database: U.S. Geological Survey, Reston, VA.	U.S. Geological Survey	USGS		42.5222	-110.431	0.01				AAS	SEDIMENTARY	UNKNOWN	UNKNOWN	MUDSTONE
C136727		USGS		Geochemistry of rock samples from the National Geochemical Database: U.S. Geological Survey, Reston, VA.	U.S. Geological Survey	USGS		42.5222	-110.431	0.01				AAS	SEDIMENTARY	UNKNOWN	UNKNOWN	MUDSTONE
C136728		USGS		Geochemistry of rock samples from the National Geochemical Database: U.S. Geological Survey, Reston, VA.	U.S. Geological Survey	USGS		42.5222	-110.431	0.01				AAS	SEDIMENTARY	UNKNOWN	UNKNOWN	MUDSTONE
C136729		USGS		Geochemistry of rock samples from the National Geochemical Database: U.S. Geological Survey, Reston, VA.	U.S. Geological Survey	USGS		42.5222	-110.431	0.01				AAS	SEDIMENTARY	UNKNOWN	UNKNOWN	MUDSTONE
C136730		USGS		Geochemistry of rock samples from the National Geochemical Database: U.S. Geological Survey, Reston, VA.	U.S. Geological Survey	USGS		42.5222	-110.431	0.01				AAS	SEDIMENTARY	UNKNOWN	UNKNOWN	MUDSTONE
C136731		USGS		Geochemistry of rock samples from the National Geochemical Database: U.S. Geological Survey, Reston, VA.	U.S. Geological Survey	USGS		42.5222	-110.431	0.01				AAS	SEDIMENTARY	UNKNOWN	UNKNOWN	MUDSTONE
C136732		USGS		Geochemistry of rock samples from the National Geochemical Database: U.S. Geological Survey, Reston, VA.	U.S. Geological Survey	USGS		42.5222	-110.431	0.01				AAS	SEDIMENTARY	UNKNOWN	UNKNOWN	MUDSTONE
C136739		USGS		Geochemistry of rock samples from the National Geochemical Database: U.S. Geological Survey, Reston, VA.	U.S. Geological Survey	USGS		42.1344	-111.26	0.01				AAS	SEDIMENTARY	UNKNOWN	UNKNOWN	MUDSTONE																														23.6
C136739		USGS		Geochemistry of rock samples from the National Geochemical Database: U.S. Geological Survey, Reston, VA.	U.S. Geological Survey	USGS		42.1344	-111.26	0.01				ICPAES	SEDIMENTARY	UNKNOWN	UNKNOWN	MUDSTONE																							1.01	29	94		33	38	355	25
C136739		USGS		Geochemistry of rock samples from the National Geochemical Database: U.S. Geological Survey, Reston, VA.	U.S. Geological Survey	USGS		42.1344	-111.26	0.01				ISE	SEDIMENTARY	UNKNOWN	UNKNOWN	MUDSTONE
C136739		USGS		Geochemistry of rock samples from the National Geochemical Database: U.S. Geological Survey, Reston, VA.	U.S. Geological Survey	USGS		42.1344	-111.26	0.01				TITR	SEDIMENTARY	UNKNOWN	UNKNOWN	MUDSTONE
C136740		USGS		Geochemistry of rock samples from the National Geochemical Database: U.S. Geological Survey, Reston, VA.	U.S. Geological Survey	USGS		42.1344	-111.26	0.01				AAS	SEDIMENTARY	UNKNOWN	UNKNOWN	MUDSTONE																														11.5
C136740		USGS		Geochemistry of rock samples from the National Geochemical Database: U.S. Geological Survey, Reston, VA.	U.S. Geological Survey	USGS		42.1344	-111.26	0.01				ICPAES	SEDIMENTARY	UNKNOWN	UNKNOWN	MUDSTONE																							0.77	157	30		15	8	77	17
C136740		USGS		Geochemistry of rock samples from the National Geochemical Database: U.S. Geological Survey, Reston, VA.	U.S. Geological Survey	USGS		42.1344	-111.26	0.01				ISE	SEDIMENTARY	UNKNOWN	UNKNOWN	MUDSTONE
C136740		USGS		Geochemistry of rock samples from the National Geochemical Database: U.S. Geological Survey, Reston, VA.	U.S. Geological Survey	USGS		42.1344	-111.26	0.01				TITR	SEDIMENTARY	UNKNOWN	UNKNOWN	MUDSTONE
C136741		USGS		Geochemistry of rock samples from the National Geochemical Database: U.S. Geological Survey, Reston, VA.	U.S. Geological Survey	USGS		42.1344	-111.26	0.01				AAS	SEDIMENTARY	UNKNOWN	UNKNOWN	MUDSTONE																														10.7
C136741		USGS		Geochemistry of rock samples from the National Geochemical Database: U.S. Geological Survey, Reston, VA.	U.S. Geological Survey	USGS		42.1344	-111.26	0.01				ICPAES	SEDIMENTARY	UNKNOWN	UNKNOWN	MUDSTONE																							0.73	138	29		14	2	38	27
C136741		USGS		Geochemistry of rock samples from the National Geochemical Database: U.S. Geological Survey, Reston, VA.	U.S. Geological Survey	USGS		42.1344	-111.26	0.01				ISE	SEDIMENTARY	UNKNOWN	UNKNOWN	MUDSTONE
C136741		USGS		Geochemistry of rock samples from the National Geochemical Database: U.S. Geological Survey, Reston, VA.	U.S. Geological Survey	USGS		42.1344	-111.26	0.01				TITR	SEDIMENTARY	UNKNOWN	UNKNOWN	MUDSTONE
C136742		USGS		Geochemistry of rock samples from the National Geochemical Database: U.S. Geological Survey, Reston, VA.	U.S. Geological Survey	USGS		42.1344	-111.26	0.01				AAS	SEDIMENTARY	UNKNOWN	UNKNOWN	MUDSTONE																														39.4
C136742		USGS		Geochemistry of rock samples from the National Geochemical Database: U.S. Geological Survey, Reston, VA.	U.S. Geological Survey	USGS		42.1344	-111.26	0.01				ICPAES	SEDIMENTARY	UNKNOWN	UNKNOWN	MUDSTONE																							2.21	125	730		119	230	7370	12	4
C136742		USGS		Geochemistry of rock samples from the National Geochemical Database: U.S. Geological Survey, Reston, VA.	U.S. Geological Survey	USGS		42.1344	-111.26	0.01				ISE	SEDIMENTARY	UNKNOWN	UNKNOWN	MUDSTONE
C136742		USGS		Geochemistry of rock samples from the National Geochemical Database: U.S. Geological Survey, Reston, VA.	U.S. Geological Survey	USGS		42.1344	-111.26	0.01				TITR	SEDIMENTARY	UNKNOWN	UNKNOWN	MUDSTONE
C136743		USGS		Geochemistry of rock samples from the National Geochemical Database: U.S. Geological Survey, Reston, VA.	U.S. Geological Survey	USGS		42.1344	-111.26	0.01				AAS	SEDIMENTARY	UNKNOWN	UNKNOWN	MUDSTONE																														15.2
C136743		USGS		Geochemistry of rock samples from the National Geochemical Database: U.S. Geological Survey, Reston, VA.	U.S. Geological Survey	USGS		42.1344	-111.26	0.01				ICPAES	SEDIMENTARY	UNKNOWN	UNKNOWN	MUDSTONE																							0.3	5	86		61	102	1070
C136743		USGS		Geochemistry of rock samples from the National Geochemical Database: U.S. Geological Survey, Reston, VA.	U.S. Geological Survey	USGS		42.1344	-111.26	0.01				ISE	SEDIMENTARY	UNKNOWN	UNKNOWN	MUDSTONE
C136743		USGS		Geochemistry of rock samples from the National Geochemical Database: U.S. Geological Survey, Reston, VA.	U.S. Geological Survey	USGS		42.1344	-111.26	0.01				TITR	SEDIMENTARY	UNKNOWN	UNKNOWN	MUDSTONE
C136744		USGS		Geochemistry of rock samples from the National Geochemical Database: U.S. Geological Survey, Reston, VA.	U.S. Geological Survey	USGS		42.1344	-111.26	0.01				AAS	SEDIMENTARY	UNKNOWN	UNKNOWN	MUDSTONE																														4.9
C136744		USGS		Geochemistry of rock samples from the National Geochemical Database: U.S. Geological Survey, Reston, VA.	U.S. Geological Survey	USGS		42.1344	-111.26	0.01				ICPAES	SEDIMENTARY	UNKNOWN	UNKNOWN	MUDSTONE																							0.19	9	143		58	100	1480
C136744		USGS		Geochemistry of rock samples from the National Geochemical Database: U.S. Geological Survey, Reston, VA.	U.S. Geological Survey	USGS		42.1344	-111.26	0.01				ISE	SEDIMENTARY	UNKNOWN	UNKNOWN	MUDSTONE
C136744		USGS		Geochemistry of rock samples from the National Geochemical Database: U.S. Geological Survey, Reston, VA.	U.S. Geological Survey	USGS		42.1344	-111.26	0.01				TITR	SEDIMENTARY	UNKNOWN	UNKNOWN	MUDSTONE
C136745		USGS		Geochemistry of rock samples from the National Geochemical Database: U.S. Geological Survey, Reston, VA.	U.S. Geological Survey	USGS		42.1344	-111.26	0.01				AAS	SEDIMENTARY	UNKNOWN	UNKNOWN	MUDSTONE																														7.1
C136745		USGS		Geochemistry of rock samples from the National Geochemical Database: U.S. Geological Survey, Reston, VA.	U.S. Geological Survey	USGS		42.1344	-111.26	0.01				ICPAES	SEDIMENTARY	UNKNOWN	UNKNOWN	MUDSTONE																							0.29	76	26		15		86	42
C136745		USGS		Geochemistry of rock samples from the National Geochemical Database: U.S. Geological Survey, Reston, VA.	U.S. Geological Survey	USGS		42.1344	-111.26	0.01				ISE	SEDIMENTARY	UNKNOWN	UNKNOWN	MUDSTONE
C136745		USGS		Geochemistry of rock samples from the National Geochemical Database: U.S. Geological Survey, Reston, VA.	U.S. Geological Survey	USGS		42.1344	-111.26	0.01				TITR	SEDIMENTARY	UNKNOWN	UNKNOWN	MUDSTONE
C136746		USGS		Geochemistry of rock samples from the National Geochemical Database: U.S. Geological Survey, Reston, VA.	U.S. Geological Survey	USGS		42.1344	-111.26	0.01				AAS	SEDIMENTARY	UNKNOWN	UNKNOWN	MUDSTONE																														15.4
C136746		USGS		Geochemistry of rock samples from the National Geochemical Database: U.S. Geological Survey, Reston, VA.	U.S. Geological Survey	USGS		42.1344	-111.26	0.01				ICPAES	SEDIMENTARY	UNKNOWN	UNKNOWN	MUDSTONE																							0.55	41	176		63	41	1470	13	3
C136746		USGS		Geochemistry of rock samples from the National Geochemical Database: U.S. Geological Survey, Reston, VA.	U.S. Geological Survey	USGS		42.1344	-111.26	0.01				ISE	SEDIMENTARY	UNKNOWN	UNKNOWN	MUDSTONE
C136746		USGS		Geochemistry of rock samples from the National Geochemical Database: U.S. Geological Survey, Reston, VA.	U.S. Geological Survey	USGS		42.1344	-111.26	0.01				TITR	SEDIMENTARY	UNKNOWN	UNKNOWN	MUDSTONE
C136747		USGS		Geochemistry of rock samples from the National Geochemical Database: U.S. Geological Survey, Reston, VA.	U.S. Geological Survey	USGS		42.1344	-111.26	0.01				AAS	SEDIMENTARY	UNKNOWN	UNKNOWN	MUDSTONE																														15.2
C136747		USGS		Geochemistry of rock samples from the National Geochemical Database: U.S. Geological Survey, Reston, VA.	U.S. Geological Survey	USGS		42.1344	-111.26	0.01				ICPAES	SEDIMENTARY	UNKNOWN	UNKNOWN	MUDSTONE																							0.4	29	189		58	52	1130	12	3
C136747		USGS		Geochemistry of rock samples from the National Geochemical Database: U.S. Geological Survey, Reston, VA.	U.S. Geological Survey	USGS		42.1344	-111.26	0.01				ISE	SEDIMENTARY	UNKNOWN	UNKNOWN	MUDSTONE
C136747		USGS		Geochemistry of rock samples from the National Geochemical Database: U.S. Geological Survey, Reston, VA.	U.S. Geological Survey	USGS		42.1344	-111.26	0.01				TITR	SEDIMENTARY	UNKNOWN	UNKNOWN	MUDSTONE
C136748		USGS		Geochemistry of rock samples from the National Geochemical Database: U.S. Geological Survey, Reston, VA.	U.S. Geological Survey	USGS		42.1344	-111.26	0.01				AAS	SEDIMENTARY	UNKNOWN	UNKNOWN	MUDSTONE																														20.5
C136748		USGS		Geochemistry of rock samples from the National Geochemical Database: U.S. Geological Survey, Reston, VA.	U.S. Geological Survey	USGS		42.1344	-111.26	0.01				ICPAES	SEDIMENTARY	UNKNOWN	UNKNOWN	MUDSTONE																							0.68	38	228		62	69	1310	13	3
C136748		USGS		Geochemistry of rock samples from the National Geochemical Database: U.S. Geological Survey, Reston, VA.	U.S. Geological Survey	USGS		42.1344	-111.26	0.01				ISE	SEDIMENTARY	UNKNOWN	UNKNOWN	MUDSTONE
C136748		USGS		Geochemistry of rock samples from the National Geochemical Database: U.S. Geological Survey, Reston, VA.	U.S. Geological Survey	USGS		42.1344	-111.26	0.01				TITR	SEDIMENTARY	UNKNOWN	UNKNOWN	MUDSTONE
C136749		USGS		Geochemistry of rock samples from the National Geochemical Database: U.S. Geological Survey, Reston, VA.	U.S. Geological Survey	USGS		42.1344	-111.26	0.01				AAS	SEDIMENTARY	UNKNOWN	UNKNOWN	MUDSTONE																														16.7
C136749		USGS		Geochemistry of rock samples from the National Geochemical Database: U.S. Geological Survey, Reston, VA.	U.S. Geological Survey	USGS		42.1344	-111.26	0.01				ICPAES	SEDIMENTARY	UNKNOWN	UNKNOWN	MUDSTONE																							0.47	35	225		66	67	1120		3
C136749		USGS		Geochemistry of rock samples from the National Geochemical Database: U.S. Geological Survey, Reston, VA.	U.S. Geological Survey	USGS		42.1344	-111.26	0.01				ISE	SEDIMENTARY	UNKNOWN	UNKNOWN	MUDSTONE
C136749		USGS		Geochemistry of rock samples from the National Geochemical Database: U.S. Geological Survey, Reston, VA.	U.S. Geological Survey	USGS		42.1344	-111.26	0.01				TITR	SEDIMENTARY	UNKNOWN	UNKNOWN	MUDSTONE
C136750		USGS		Geochemistry of rock samples from the National Geochemical Database: U.S. Geological Survey, Reston, VA.	U.S. Geological Survey	USGS		42.1344	-111.26	0.01				AAS	SEDIMENTARY	UNKNOWN	UNKNOWN	MUDSTONE																														16
C136750		USGS		Geochemistry of rock samples from the National Geochemical Database: U.S. Geological Survey, Reston, VA.	U.S. Geological Survey	USGS		42.1344	-111.26	0.01				ICPAES	SEDIMENTARY	UNKNOWN	UNKNOWN	MUDSTONE																							0.51	32	251		68	187	3100	20
C136750		USGS		Geochemistry of rock samples from the National Geochemical Database: U.S. Geological Survey, Reston, VA.	U.S. Geological Survey	USGS		42.1344	-111.26	0.01				ISE	SEDIMENTARY	UNKNOWN	UNKNOWN	MUDSTONE
C136750		USGS		Geochemistry of rock samples from the National Geochemical Database: U.S. Geological Survey, Reston, VA.	U.S. Geological Survey	USGS		42.1344	-111.26	0.01				TITR	SEDIMENTARY	UNKNOWN	UNKNOWN	MUDSTONE
C136751		USGS		Geochemistry of rock samples from the National Geochemical Database: U.S. Geological Survey, Reston, VA.	U.S. Geological Survey	USGS		42.1344	-111.26	0.01				AAS	SEDIMENTARY	UNKNOWN	UNKNOWN	MUDSTONE																														30.2
C136751		USGS		Geochemistry of rock samples from the National Geochemical Database: U.S. Geological Survey, Reston, VA.	U.S. Geological Survey	USGS		42.1344	-111.26	0.01				ICPAES	SEDIMENTARY	UNKNOWN	UNKNOWN	MUDSTONE																							1.13	59	280		122	13	1210	23	4
C136751		USGS		Geochemistry of rock samples from the National Geochemical Database: U.S. Geological Survey, Reston, VA.	U.S. Geological Survey	USGS		42.1344	-111.26	0.01				ISE	SEDIMENTARY	UNKNOWN	UNKNOWN	MUDSTONE
C136751		USGS		Geochemistry of rock samples from the National Geochemical Database: U.S. Geological Survey, Reston, VA.	U.S. Geological Survey	USGS		42.1344	-111.26	0.01				TITR	SEDIMENTARY	UNKNOWN	UNKNOWN	MUDSTONE
C136752		USGS		Geochemistry of rock samples from the National Geochemical Database: U.S. Geological Survey, Reston, VA.	U.S. Geological Survey	USGS		42.1344	-111.26	0.01				AAS	SEDIMENTARY	UNKNOWN	UNKNOWN	MUDSTONE																														57.5
C136752		USGS		Geochemistry of rock samples from the National Geochemical Database: U.S. Geological Survey, Reston, VA.	U.S. Geological Survey	USGS		42.1344	-111.26	0.01				ICPAES	SEDIMENTARY	UNKNOWN	UNKNOWN	MUDSTONE																							1.52	94	356		140	374	4240	50	8
C136752		USGS		Geochemistry of rock samples from the National Geochemical Database: U.S. Geological Survey, Reston, VA.	U.S. Geological Survey	USGS		42.1344	-111.26	0.01				ISE	SEDIMENTARY	UNKNOWN	UNKNOWN	MUDSTONE
C136752		USGS		Geochemistry of rock samples from the National Geochemical Database: U.S. Geological Survey, Reston, VA.	U.S. Geological Survey	USGS		42.1344	-111.26	0.01				TITR	SEDIMENTARY	UNKNOWN	UNKNOWN	MUDSTONE
C136753		USGS		Geochemistry of rock samples from the National Geochemical Database: U.S. Geological Survey, Reston, VA.	U.S. Geological Survey	USGS		42.1344	-111.26	0.01				AAS	SEDIMENTARY	UNKNOWN	UNKNOWN	MUDSTONE																														28
C136753		USGS		Geochemistry of rock samples from the National Geochemical Database: U.S. Geological Survey, Reston, VA.	U.S. Geological Survey	USGS		42.1344	-111.26	0.01				ICPAES	SEDIMENTARY	UNKNOWN	UNKNOWN	MUDSTONE																							0.5	42	223		91	171	2150	28	4
C136753		USGS		Geochemistry of rock samples from the National Geochemical Database: U.S. Geological Survey, Reston, VA.	U.S. Geological Survey	USGS		42.1344	-111.26	0.01				ISE	SEDIMENTARY	UNKNOWN	UNKNOWN	MUDSTONE
C136753		USGS		Geochemistry of rock samples from the National Geochemical Database: U.S. Geological Survey, Reston, VA.	U.S. Geological Survey	USGS		42.1344	-111.26	0.01				TITR	SEDIMENTARY	UNKNOWN	UNKNOWN	MUDSTONE
C136754		USGS		Geochemistry of rock samples from the National Geochemical Database: U.S. Geological Survey, Reston, VA.	U.S. Geological Survey	USGS		42.1344	-111.26	0.01				AAS	SEDIMENTARY	UNKNOWN	UNKNOWN	MUDSTONE																														28.8
C136754		USGS		Geochemistry of rock samples from the National Geochemical Database: U.S. Geological Survey, Reston, VA.	U.S. Geological Survey	USGS		42.1344	-111.26	0.01				ICPAES	SEDIMENTARY	UNKNOWN	UNKNOWN	MUDSTONE																							0.45	33	303		96	324	4530	36	2
C136754		USGS		Geochemistry of rock samples from the National Geochemical Database: U.S. Geological Survey, Reston, VA.	U.S. Geological Survey	USGS		42.1344	-111.26	0.01				ISE	SEDIMENTARY	UNKNOWN	UNKNOWN	MUDSTONE
C136754		USGS		Geochemistry of rock samples from the National Geochemical Database: U.S. Geological Survey, Reston, VA.	U.S. Geological Survey	USGS		42.1344	-111.26	0.01				TITR	SEDIMENTARY	UNKNOWN	UNKNOWN	MUDSTONE
C136755		USGS		Geochemistry of rock samples from the National Geochemical Database: U.S. Geological Survey, Reston, VA.	U.S. Geological Survey	USGS		42.1344	-111.26	0.01				AAS	SEDIMENTARY	UNKNOWN	UNKNOWN	MUDSTONE																														15.8
C136755		USGS		Geochemistry of rock samples from the National Geochemical Database: U.S. Geological Survey, Reston, VA.	U.S. Geological Survey	USGS		42.1344	-111.26	0.01				ICPAES	SEDIMENTARY	UNKNOWN	UNKNOWN	MUDSTONE																							0.12	32	119		54	131	2430	27
C136755		USGS		Geochemistry of rock samples from the National Geochemical Database: U.S. Geological Survey, Reston, VA.	U.S. Geological Survey	USGS		42.1344	-111.26	0.01				ISE	SEDIMENTARY	UNKNOWN	UNKNOWN	MUDSTONE
C136755		USGS		Geochemistry of rock samples from the National Geochemical Database: U.S. Geological Survey, Reston, VA.	U.S. Geological Survey	USGS		42.1344	-111.26	0.01				TITR	SEDIMENTARY	UNKNOWN	UNKNOWN	MUDSTONE
C136756		USGS		Geochemistry of rock samples from the National Geochemical Database: U.S. Geological Survey, Reston, VA.	U.S. Geological Survey	USGS		42.1344	-111.26	0.01				AAS	SEDIMENTARY	UNKNOWN	UNKNOWN	MUDSTONE																														4.6
C136756		USGS		Geochemistry of rock samples from the National Geochemical Database: U.S. Geological Survey, Reston, VA.	U.S. Geological Survey	USGS		42.1344	-111.26	0.01				ICPAES	SEDIMENTARY	UNKNOWN	UNKNOWN	MUDSTONE																							0.09	137	26		19	18	398	15
C136756		USGS		Geochemistry of rock samples from the National Geochemical Database: U.S. Geological Survey, Reston, VA.	U.S. Geological Survey	USGS		42.1344	-111.26	0.01				ISE	SEDIMENTARY	UNKNOWN	UNKNOWN	MUDSTONE
C136756		USGS		Geochemistry of rock samples from the National Geochemical Database: U.S. Geological Survey, Reston, VA.	U.S. Geological Survey	USGS		42.1344	-111.26	0.01				TITR	SEDIMENTARY	UNKNOWN	UNKNOWN	MUDSTONE
C136757		USGS		Geochemistry of rock samples from the National Geochemical Database: U.S. Geological Survey, Reston, VA.	U.S. Geological Survey	USGS		42.1344	-111.26	0.01				AAS	SEDIMENTARY	UNKNOWN	UNKNOWN	MUDSTONE																														27.7
C136757		USGS		Geochemistry of rock samples from the National Geochemical Database: U.S. Geological Survey, Reston, VA.	U.S. Geological Survey	USGS		42.1344	-111.26	0.01				ICPAES	SEDIMENTARY	UNKNOWN	UNKNOWN	MUDSTONE																							0.61	50	146		63	72	1300	36	3
C136757		USGS		Geochemistry of rock samples from the National Geochemical Database: U.S. Geological Survey, Reston, VA.	U.S. Geological Survey	USGS		42.1344	-111.26	0.01				ISE	SEDIMENTARY	UNKNOWN	UNKNOWN	MUDSTONE
C136757		USGS		Geochemistry of rock samples from the National Geochemical Database: U.S. Geological Survey, Reston, VA.	U.S. Geological Survey	USGS		42.1344	-111.26	0.01				TITR	SEDIMENTARY	UNKNOWN	UNKNOWN	MUDSTONE
C136758		USGS		Geochemistry of rock samples from the National Geochemical Database: U.S. Geological Survey, Reston, VA.	U.S. Geological Survey	USGS		42.1344	-111.26	0.01				AAS	SEDIMENTARY	UNKNOWN	UNKNOWN	MUDSTONE																														10.6
C136758		USGS		Geochemistry of rock samples from the National Geochemical Database: U.S. Geological Survey, Reston, VA.	U.S. Geological Survey	USGS		42.1344	-111.26	0.01				ICPAES	SEDIMENTARY	UNKNOWN	UNKNOWN	MUDSTONE																							0.2	35	156		75	169	3750
C136758		USGS		Geochemistry of rock samples from the National Geochemical Database: U.S. Geological Survey, Reston, VA.	U.S. Geological Survey	USGS		42.1344	-111.26	0.01				ISE	SEDIMENTARY	UNKNOWN	UNKNOWN	MUDSTONE
C136758		USGS		Geochemistry of rock samples from the National Geochemical Database: U.S. Geological Survey, Reston, VA.	U.S. Geological Survey	USGS		42.1344	-111.26	0.01				TITR	SEDIMENTARY	UNKNOWN	UNKNOWN	MUDSTONE
C136759		USGS		Geochemistry of rock samples from the National Geochemical Database: U.S. Geological Survey, Reston, VA.	U.S. Geological Survey	USGS		42.1344	-111.26	0.01				AAS	SEDIMENTARY	UNKNOWN	UNKNOWN	MUDSTONE																														6.5
C136759		USGS		Geochemistry of rock samples from the National Geochemical Database: U.S. Geological Survey, Reston, VA.	U.S. Geological Survey	USGS		42.1344	-111.26	0.01				ICPAES	SEDIMENTARY	UNKNOWN	UNKNOWN	MUDSTONE																							0.1	27	119		32	135	2640
C136759		USGS		Geochemistry of rock samples from the National Geochemical Database: U.S. Geological Survey, Reston, VA.	U.S. Geological Survey	USGS		42.1344	-111.26	0.01				ISE	SEDIMENTARY	UNKNOWN	UNKNOWN	MUDSTONE
C136759		USGS		Geochemistry of rock samples from the National Geochemical Database: U.S. Geological Survey, Reston, VA.	U.S. Geological Survey	USGS		42.1344	-111.26	0.01				TITR	SEDIMENTARY	UNKNOWN	UNKNOWN	MUDSTONE
C136760		USGS		Geochemistry of rock samples from the National Geochemical Database: U.S. Geological Survey, Reston, VA.	U.S. Geological Survey	USGS		42.1344	-111.26	0.01				AAS	SEDIMENTARY	UNKNOWN	UNKNOWN	MUDSTONE																														36.1
C136760		USGS		Geochemistry of rock samples from the National Geochemical Database: U.S. Geological Survey, Reston, VA.	U.S. Geological Survey	USGS		42.1344	-111.26	0.01				ICPAES	SEDIMENTARY	UNKNOWN	UNKNOWN	MUDSTONE																							1.13	87	192		95	94	1610	35	6
C136760		USGS		Geochemistry of rock samples from the National Geochemical Database: U.S. Geological Survey, Reston, VA.	U.S. Geological Survey	USGS		42.1344	-111.26	0.01				ISE	SEDIMENTARY	UNKNOWN	UNKNOWN	MUDSTONE
C136760		USGS		Geochemistry of rock samples from the National Geochemical Database: U.S. Geological Survey, Reston, VA.	U.S. Geological Survey	USGS		42.1344	-111.26	0.01				TITR	SEDIMENTARY	UNKNOWN	UNKNOWN	MUDSTONE
C136761		USGS		Geochemistry of rock samples from the National Geochemical Database: U.S. Geological Survey, Reston, VA.	U.S. Geological Survey	USGS		42.1344	-111.26	0.01				AAS	SEDIMENTARY	UNKNOWN	UNKNOWN	MUDSTONE																														17.3
C136761		USGS		Geochemistry of rock samples from the National Geochemical Database: U.S. Geological Survey, Reston, VA.	U.S. Geological Survey	USGS		42.1344	-111.26	0.01				ICPAES	SEDIMENTARY	UNKNOWN	UNKNOWN	MUDSTONE																							0.62	38	414		55	93	3690	16
C136761		USGS		Geochemistry of rock samples from the National Geochemical Database: U.S. Geological Survey, Reston, VA.	U.S. Geological Survey	USGS		42.1344	-111.26	0.01				ISE	SEDIMENTARY	UNKNOWN	UNKNOWN	MUDSTONE
C136761		USGS		Geochemistry of rock samples from the National Geochemical Database: U.S. Geological Survey, Reston, VA.	U.S. Geological Survey	USGS		42.1344	-111.26	0.01				TITR	SEDIMENTARY	UNKNOWN	UNKNOWN	MUDSTONE
C136762		USGS		Geochemistry of rock samples from the National Geochemical Database: U.S. Geological Survey, Reston, VA.	U.S. Geological Survey	USGS		42.1344	-111.26	0.01				AAS	SEDIMENTARY	UNKNOWN	UNKNOWN	MUDSTONE																														23.2
C136762		USGS		Geochemistry of rock samples from the National Geochemical Database: U.S. Geological Survey, Reston, VA.	U.S. Geological Survey	USGS		42.1344	-111.26	0.01				ICPAES	SEDIMENTARY	UNKNOWN	UNKNOWN	MUDSTONE																							1.07	111	138		52	134	2010	11
C136762		USGS		Geochemistry of rock samples from the National Geochemical Database: U.S. Geological Survey, Reston, VA.	U.S. Geological Survey	USGS		42.1344	-111.26	0.01				ISE	SEDIMENTARY	UNKNOWN	UNKNOWN	MUDSTONE
C136762		USGS		Geochemistry of rock samples from the National Geochemical Database: U.S. Geological Survey, Reston, VA.	U.S. Geological Survey	USGS		42.1344	-111.26	0.01				TITR	SEDIMENTARY	UNKNOWN	UNKNOWN	MUDSTONE
C136763		USGS		Geochemistry of rock samples from the National Geochemical Database: U.S. Geological Survey, Reston, VA.	U.S. Geological Survey	USGS		42.1344	-111.26	0.01				AAS	SEDIMENTARY	UNKNOWN	UNKNOWN	MUDSTONE																														26.3
C136763		USGS		Geochemistry of rock samples from the National Geochemical Database: U.S. Geological Survey, Reston, VA.	U.S. Geological Survey	USGS		42.1344	-111.26	0.01				ICPAES	SEDIMENTARY	UNKNOWN	UNKNOWN	MUDSTONE																							1.67	206	96	3	30	8	248	33
C136763		USGS		Geochemistry of rock samples from the National Geochemical Database: U.S. Geological Survey, Reston, VA.	U.S. Geological Survey	USGS		42.1344	-111.26	0.01				ISE	SEDIMENTARY	UNKNOWN	UNKNOWN	MUDSTONE
C136763		USGS		Geochemistry of rock samples from the National Geochemical Database: U.S. Geological Survey, Reston, VA.	U.S. Geological Survey	USGS		42.1344	-111.26	0.01				TITR	SEDIMENTARY	UNKNOWN	UNKNOWN	MUDSTONE
C136764		USGS		Geochemistry of rock samples from the National Geochemical Database: U.S. Geological Survey, Reston, VA.	U.S. Geological Survey	USGS		42.1344	-111.26	0.01				AAS	SEDIMENTARY	UNKNOWN	UNKNOWN	MUDSTONE																														26.4
C136764		USGS		Geochemistry of rock samples from the National Geochemical Database: U.S. Geological Survey, Reston, VA.	U.S. Geological Survey	USGS		42.1344	-111.26	0.01				ICPAES	SEDIMENTARY	UNKNOWN	UNKNOWN	MUDSTONE																							0.97	65	278		62	220	4810	20
C136764		USGS		Geochemistry of rock samples from the National Geochemical Database: U.S. Geological Survey, Reston, VA.	U.S. Geological Survey	USGS		42.1344	-111.26	0.01				ISE	SEDIMENTARY	UNKNOWN	UNKNOWN	MUDSTONE
C136764		USGS		Geochemistry of rock samples from the National Geochemical Database: U.S. Geological Survey, Reston, VA.	U.S. Geological Survey	USGS		42.1344	-111.26	0.01				TITR	SEDIMENTARY	UNKNOWN	UNKNOWN	MUDSTONE
C136765		USGS		Geochemistry of rock samples from the National Geochemical Database: U.S. Geological Survey, Reston, VA.	U.S. Geological Survey	USGS		42.1344	-111.26	0.01				AAS	SEDIMENTARY	UNKNOWN	UNKNOWN	MUDSTONE																														17.6
C136765		USGS		Geochemistry of rock samples from the National Geochemical Database: U.S. Geological Survey, Reston, VA.	U.S. Geological Survey	USGS		42.1344	-111.26	0.01				ICPAES	SEDIMENTARY	UNKNOWN	UNKNOWN	MUDSTONE																							0.62	45	294		55	193	4000	24
C136765		USGS		Geochemistry of rock samples from the National Geochemical Database: U.S. Geological Survey, Reston, VA.	U.S. Geological Survey	USGS		42.1344	-111.26	0.01				ISE	SEDIMENTARY	UNKNOWN	UNKNOWN	MUDSTONE
C136765		USGS		Geochemistry of rock samples from the National Geochemical Database: U.S. Geological Survey, Reston, VA.	U.S. Geological Survey	USGS		42.1344	-111.26	0.01				TITR	SEDIMENTARY	UNKNOWN	UNKNOWN	MUDSTONE
C136766		USGS		Geochemistry of rock samples from the National Geochemical Database: U.S. Geological Survey, Reston, VA.	U.S. Geological Survey	USGS		42.1344	-111.26	0.01				AAS	SEDIMENTARY	UNKNOWN	UNKNOWN	MUDSTONE																														4.4
C136766		USGS		Geochemistry of rock samples from the National Geochemical Database: U.S. Geological Survey, Reston, VA.	U.S. Geological Survey	USGS		42.1344	-111.26	0.01				ICPAES	SEDIMENTARY	UNKNOWN	UNKNOWN	MUDSTONE																							0.17	148	29		20		76	18
C136766		USGS		Geochemistry of rock samples from the National Geochemical Database: U.S. Geological Survey, Reston, VA.	U.S. Geological Survey	USGS		42.1344	-111.26	0.01				ISE	SEDIMENTARY	UNKNOWN	UNKNOWN	MUDSTONE
C136766		USGS		Geochemistry of rock samples from the National Geochemical Database: U.S. Geological Survey, Reston, VA.	U.S. Geological Survey	USGS		42.1344	-111.26	0.01				TITR	SEDIMENTARY	UNKNOWN	UNKNOWN	MUDSTONE
C136767		USGS		Geochemistry of rock samples from the National Geochemical Database: U.S. Geological Survey, Reston, VA.	U.S. Geological Survey	USGS		42.1344	-111.26	0.01				AAS	SEDIMENTARY	UNKNOWN	UNKNOWN	MUDSTONE																														14.9
C136767		USGS		Geochemistry of rock samples from the National Geochemical Database: U.S. Geological Survey, Reston, VA.	U.S. Geological Survey	USGS		42.1344	-111.26	0.01				ICPAES	SEDIMENTARY	UNKNOWN	UNKNOWN	MUDSTONE																							0.65	184	40	2	18	3	106	28
C136767		USGS		Geochemistry of rock samples from the National Geochemical Database: U.S. Geological Survey, Reston, VA.	U.S. Geological Survey	USGS		42.1344	-111.26	0.01				ISE	SEDIMENTARY	UNKNOWN	UNKNOWN	MUDSTONE
C136767		USGS		Geochemistry of rock samples from the National Geochemical Database: U.S. Geological Survey, Reston, VA.	U.S. Geological Survey	USGS		42.1344	-111.26	0.01				TITR	SEDIMENTARY	UNKNOWN	UNKNOWN	MUDSTONE
C136768		USGS		Geochemistry of rock samples from the National Geochemical Database: U.S. Geological Survey, Reston, VA.	U.S. Geological Survey	USGS		42.1344	-111.26	0.01				AAS	SEDIMENTARY	UNKNOWN	UNKNOWN	MUDSTONE																														33.2
C136768		USGS		Geochemistry of rock samples from the National Geochemical Database: U.S. Geological Survey, Reston, VA.	U.S. Geological Survey	USGS		42.1344	-111.26	0.01				ICPAES	SEDIMENTARY	UNKNOWN	UNKNOWN	MUDSTONE																							1.41	91	130		48	29	988	44	4
C136768		USGS		Geochemistry of rock samples from the National Geochemical Database: U.S. Geological Survey, Reston, VA.	U.S. Geological Survey	USGS		42.1344	-111.26	0.01				ISE	SEDIMENTARY	UNKNOWN	UNKNOWN	MUDSTONE
C136768		USGS		Geochemistry of rock samples from the National Geochemical Database: U.S. Geological Survey, Reston, VA.	U.S. Geological Survey	USGS		42.1344	-111.26	0.01				TITR	SEDIMENTARY	UNKNOWN	UNKNOWN	MUDSTONE
C136769		USGS		Geochemistry of rock samples from the National Geochemical Database: U.S. Geological Survey, Reston, VA.	U.S. Geological Survey	USGS		42.1344	-111.26	0.01				AAS	SEDIMENTARY	UNKNOWN	UNKNOWN	MUDSTONE																														26.8
C136769		USGS		Geochemistry of rock samples from the National Geochemical Database: U.S. Geological Survey, Reston, VA.	U.S. Geological Survey	USGS		42.1344	-111.26	0.01				ICPAES	SEDIMENTARY	UNKNOWN	UNKNOWN	MUDSTONE																							1.09	101	106		38	3	393	40
C136769		USGS		Geochemistry of rock samples from the National Geochemical Database: U.S. Geological Survey, Reston, VA.	U.S. Geological Survey	USGS		42.1344	-111.26	0.01				ISE	SEDIMENTARY	UNKNOWN	UNKNOWN	MUDSTONE
C136769		USGS		Geochemistry of rock samples from the National Geochemical Database: U.S. Geological Survey, Reston, VA.	U.S. Geological Survey	USGS		42.1344	-111.26	0.01				TITR	SEDIMENTARY	UNKNOWN	UNKNOWN	MUDSTONE
C136770		USGS		Geochemistry of rock samples from the National Geochemical Database: U.S. Geological Survey, Reston, VA.	U.S. Geological Survey	USGS		42.1344	-111.26	0.01				AAS	SEDIMENTARY	UNKNOWN	UNKNOWN	MUDSTONE																														9.8
C136770		USGS		Geochemistry of rock samples from the National Geochemical Database: U.S. Geological Survey, Reston, VA.	U.S. Geological Survey	USGS		42.1344	-111.26	0.01				ICPAES	SEDIMENTARY	UNKNOWN	UNKNOWN	MUDSTONE																							0.29	150	31		20		88	32
C136770		USGS		Geochemistry of rock samples from the National Geochemical Database: U.S. Geological Survey, Reston, VA.	U.S. Geological Survey	USGS		42.1344	-111.26	0.01				ISE	SEDIMENTARY	UNKNOWN	UNKNOWN	MUDSTONE
C136770		USGS		Geochemistry of rock samples from the National Geochemical Database: U.S. Geological Survey, Reston, VA.	U.S. Geological Survey	USGS		42.1344	-111.26	0.01				TITR	SEDIMENTARY	UNKNOWN	UNKNOWN	MUDSTONE
C136771		USGS		Geochemistry of rock samples from the National Geochemical Database: U.S. Geological Survey, Reston, VA.	U.S. Geological Survey	USGS		42.1344	-111.26	0.01				AAS	SEDIMENTARY	UNKNOWN	UNKNOWN	MUDSTONE																														18.7
C136771		USGS		Geochemistry of rock samples from the National Geochemical Database: U.S. Geological Survey, Reston, VA.	U.S. Geological Survey	USGS		42.1344	-111.26	0.01				ICPAES	SEDIMENTARY	UNKNOWN	UNKNOWN	MUDSTONE																							0.73	45	282		115	222	2550		3
C136771		USGS		Geochemistry of rock samples from the National Geochemical Database: U.S. Geological Survey, Reston, VA.	U.S. Geological Survey	USGS		42.1344	-111.26	0.01				ISE	SEDIMENTARY	UNKNOWN	UNKNOWN	MUDSTONE
C136771		USGS		Geochemistry of rock samples from the National Geochemical Database: U.S. Geological Survey, Reston, VA.	U.S. Geological Survey	USGS		42.1344	-111.26	0.01				TITR	SEDIMENTARY	UNKNOWN	UNKNOWN	MUDSTONE
C136772		USGS		Geochemistry of rock samples from the National Geochemical Database: U.S. Geological Survey, Reston, VA.	U.S. Geological Survey	USGS		42.1344	-111.26	0.01				AAS	SEDIMENTARY	UNKNOWN	UNKNOWN	MUDSTONE																														15.5
C136772		USGS		Geochemistry of rock samples from the National Geochemical Database: U.S. Geological Survey, Reston, VA.	U.S. Geological Survey	USGS		42.1344	-111.26	0.01				ICPAES	SEDIMENTARY	UNKNOWN	UNKNOWN	MUDSTONE																							0.58	37	246		82	263	2040	15	4
C136772		USGS		Geochemistry of rock samples from the National Geochemical Database: U.S. Geological Survey, Reston, VA.	U.S. Geological Survey	USGS		42.1344	-111.26	0.01				ISE	SEDIMENTARY	UNKNOWN	UNKNOWN	MUDSTONE
C136772		USGS		Geochemistry of rock samples from the National Geochemical Database: U.S. Geological Survey, Reston, VA.	U.S. Geological Survey	USGS		42.1344	-111.26	0.01				TITR	SEDIMENTARY	UNKNOWN	UNKNOWN	MUDSTONE
C136773		USGS		Geochemistry of rock samples from the National Geochemical Database: U.S. Geological Survey, Reston, VA.	U.S. Geological Survey	USGS		42.1344	-111.26	0.01				AAS	SEDIMENTARY	UNKNOWN	UNKNOWN	MUDSTONE																														21.8
C136773		USGS		Geochemistry of rock samples from the National Geochemical Database: U.S. Geological Survey, Reston, VA.	U.S. Geological Survey	USGS		42.1344	-111.26	0.01				ICPAES	SEDIMENTARY	UNKNOWN	UNKNOWN	MUDSTONE																							0.54	19	310		168	11	1280		2
C136773		USGS		Geochemistry of rock samples from the National Geochemical Database: U.S. Geological Survey, Reston, VA.	U.S. Geological Survey	USGS		42.1344	-111.26	0.01				ISE	SEDIMENTARY	UNKNOWN	UNKNOWN	MUDSTONE
C136773		USGS		Geochemistry of rock samples from the National Geochemical Database: U.S. Geological Survey, Reston, VA.	U.S. Geological Survey	USGS		42.1344	-111.26	0.01				TITR	SEDIMENTARY	UNKNOWN	UNKNOWN	MUDSTONE
C136774		USGS		Geochemistry of rock samples from the National Geochemical Database: U.S. Geological Survey, Reston, VA.	U.S. Geological Survey	USGS		42.1344	-111.26	0.01				AAS	SEDIMENTARY	UNKNOWN	UNKNOWN	MUDSTONE																														55.2
C136774		USGS		Geochemistry of rock samples from the National Geochemical Database: U.S. Geological Survey, Reston, VA.	U.S. Geological Survey	USGS		42.1344	-111.26	0.01				ICPAES	SEDIMENTARY	UNKNOWN	UNKNOWN	MUDSTONE																							0.77	49	312		166	6	1430	19	3
C136774		USGS		Geochemistry of rock samples from the National Geochemical Database: U.S. Geological Survey, Reston, VA.	U.S. Geological Survey	USGS		42.1344	-111.26	0.01				ISE	SEDIMENTARY	UNKNOWN	UNKNOWN	MUDSTONE
C136774		USGS		Geochemistry of rock samples from the National Geochemical Database: U.S. Geological Survey, Reston, VA.	U.S. Geological Survey	USGS		42.1344	-111.26	0.01				TITR	SEDIMENTARY	UNKNOWN	UNKNOWN	MUDSTONE
C136775		USGS		Geochemistry of rock samples from the National Geochemical Database: U.S. Geological Survey, Reston, VA.	U.S. Geological Survey	USGS		42.1344	-111.26	0.01				AAS	SEDIMENTARY	UNKNOWN	UNKNOWN	MUDSTONE																														21
C136775		USGS		Geochemistry of rock samples from the National Geochemical Database: U.S. Geological Survey, Reston, VA.	U.S. Geological Survey	USGS		42.1344	-111.26	0.01				ICPAES	SEDIMENTARY	UNKNOWN	UNKNOWN	MUDSTONE																							0.6	36	247		124	7	1120	11	2
C136775		USGS		Geochemistry of rock samples from the National Geochemical Database: U.S. Geological Survey, Reston, VA.	U.S. Geological Survey	USGS		42.1344	-111.26	0.01				ISE	SEDIMENTARY	UNKNOWN	UNKNOWN	MUDSTONE
C136775		USGS		Geochemistry of rock samples from the National Geochemical Database: U.S. Geological Survey, Reston, VA.	U.S. Geological Survey	USGS		42.1344	-111.26	0.01				TITR	SEDIMENTARY	UNKNOWN	UNKNOWN	MUDSTONE
C136776		USGS		Geochemistry of rock samples from the National Geochemical Database: U.S. Geological Survey, Reston, VA.	U.S. Geological Survey	USGS		42.1344	-111.26	0.01				AAS	SEDIMENTARY	UNKNOWN	UNKNOWN	MUDSTONE																														57.9
C136776		USGS		Geochemistry of rock samples from the National Geochemical Database: U.S. Geological Survey, Reston, VA.	U.S. Geological Survey	USGS		42.1344	-111.26	0.01				ICPAES	SEDIMENTARY	UNKNOWN	UNKNOWN	MUDSTONE																							1.89	199	57		24	2	214	37
C136776		USGS		Geochemistry of rock samples from the National Geochemical Database: U.S. Geological Survey, Reston, VA.	U.S. Geological Survey	USGS		42.1344	-111.26	0.01				ISE	SEDIMENTARY	UNKNOWN	UNKNOWN	MUDSTONE
C136776		USGS		Geochemistry of rock samples from the National Geochemical Database: U.S. Geological Survey, Reston, VA.	U.S. Geological Survey	USGS		42.1344	-111.26	0.01				TITR	SEDIMENTARY	UNKNOWN	UNKNOWN	MUDSTONE
C136777		USGS		Geochemistry of rock samples from the National Geochemical Database: U.S. Geological Survey, Reston, VA.	U.S. Geological Survey	USGS		42.1344	-111.26	0.01				AAS	SEDIMENTARY	UNKNOWN	UNKNOWN	MUDSTONE																														44.6
C136777		USGS		Geochemistry of rock samples from the National Geochemical Database: U.S. Geological Survey, Reston, VA.	U.S. Geological Survey	USGS		42.1344	-111.26	0.01				ICPAES	SEDIMENTARY	UNKNOWN	UNKNOWN	MUDSTONE																							2.2	144	212		66	2	736	58	2
C136777		USGS		Geochemistry of rock samples from the National Geochemical Database: U.S. Geological Survey, Reston, VA.	U.S. Geological Survey	USGS		42.1344	-111.26	0.01				ISE	SEDIMENTARY	UNKNOWN	UNKNOWN	MUDSTONE
C136777		USGS		Geochemistry of rock samples from the National Geochemical Database: U.S. Geological Survey, Reston, VA.	U.S. Geological Survey	USGS		42.1344	-111.26	0.01				TITR	SEDIMENTARY	UNKNOWN	UNKNOWN	MUDSTONE
C136778		USGS		Geochemistry of rock samples from the National Geochemical Database: U.S. Geological Survey, Reston, VA.	U.S. Geological Survey	USGS		42.1344	-111.26	0.01				AAS	SEDIMENTARY	UNKNOWN	UNKNOWN	MUDSTONE																														90.4
C136778		USGS		Geochemistry of rock samples from the National Geochemical Database: U.S. Geological Survey, Reston, VA.	U.S. Geological Survey	USGS		42.1344	-111.26	0.01				ICPAES	SEDIMENTARY	UNKNOWN	UNKNOWN	MUDSTONE																							4.31	171	181	3	110	3	848	88	4
C136778		USGS		Geochemistry of rock samples from the National Geochemical Database: U.S. Geological Survey, Reston, VA.	U.S. Geological Survey	USGS		42.1344	-111.26	0.01				ISE	SEDIMENTARY	UNKNOWN	UNKNOWN	MUDSTONE
C136778		USGS		Geochemistry of rock samples from the National Geochemical Database: U.S. Geological Survey, Reston, VA.	U.S. Geological Survey	USGS		42.1344	-111.26	0.01				TITR	SEDIMENTARY	UNKNOWN	UNKNOWN	MUDSTONE
C136779		USGS		Geochemistry of rock samples from the National Geochemical Database: U.S. Geological Survey, Reston, VA.	U.S. Geological Survey	USGS		42.1344	-111.26	0.01				AAS	SEDIMENTARY	UNKNOWN	UNKNOWN	MUDSTONE																														20.6
C136779		USGS		Geochemistry of rock samples from the National Geochemical Database: U.S. Geological Survey, Reston, VA.	U.S. Geological Survey	USGS		42.1344	-111.26	0.01				ICPAES	SEDIMENTARY	UNKNOWN	UNKNOWN	MUDSTONE																							1.43	81	252		86	34	1030		2
C136779		USGS		Geochemistry of rock samples from the National Geochemical Database: U.S. Geological Survey, Reston, VA.	U.S. Geological Survey	USGS		42.1344	-111.26	0.01				ISE	SEDIMENTARY	UNKNOWN	UNKNOWN	MUDSTONE
C136779		USGS		Geochemistry of rock samples from the National Geochemical Database: U.S. Geological Survey, Reston, VA.	U.S. Geological Survey	USGS		42.1344	-111.26	0.01				TITR	SEDIMENTARY	UNKNOWN	UNKNOWN	MUDSTONE
C136780		USGS		Geochemistry of rock samples from the National Geochemical Database: U.S. Geological Survey, Reston, VA.	U.S. Geological Survey	USGS		42.1344	-111.26	0.01				AAS	SEDIMENTARY	UNKNOWN	UNKNOWN	MUDSTONE																														23.6
C136780		USGS		Geochemistry of rock samples from the National Geochemical Database: U.S. Geological Survey, Reston, VA.	U.S. Geological Survey	USGS		42.1344	-111.26	0.01				ICPAES	SEDIMENTARY	UNKNOWN	UNKNOWN	MUDSTONE																							1.42	78	330		125	9	1320		4
C136780		USGS		Geochemistry of rock samples from the National Geochemical Database: U.S. Geological Survey, Reston, VA.	U.S. Geological Survey	USGS		42.1344	-111.26	0.01				ISE	SEDIMENTARY	UNKNOWN	UNKNOWN	MUDSTONE
C136780		USGS		Geochemistry of rock samples from the National Geochemical Database: U.S. Geological Survey, Reston, VA.	U.S. Geological Survey	USGS		42.1344	-111.26	0.01				TITR	SEDIMENTARY	UNKNOWN	UNKNOWN	MUDSTONE
C136781		USGS		Geochemistry of rock samples from the National Geochemical Database: U.S. Geological Survey, Reston, VA.	U.S. Geological Survey	USGS		42.1344	-111.26	0.01				AAS	SEDIMENTARY	UNKNOWN	UNKNOWN	MUDSTONE																														20.4
C136781		USGS		Geochemistry of rock samples from the National Geochemical Database: U.S. Geological Survey, Reston, VA.	U.S. Geological Survey	USGS		42.1344	-111.26	0.01				ICPAES	SEDIMENTARY	UNKNOWN	UNKNOWN	MUDSTONE																							1.4	72	219		85	5	866	15
C136781		USGS		Geochemistry of rock samples from the National Geochemical Database: U.S. Geological Survey, Reston, VA.	U.S. Geological Survey	USGS		42.1344	-111.26	0.01				ISE	SEDIMENTARY	UNKNOWN	UNKNOWN	MUDSTONE
C136781		USGS		Geochemistry of rock samples from the National Geochemical Database: U.S. Geological Survey, Reston, VA.	U.S. Geological Survey	USGS		42.1344	-111.26	0.01				TITR	SEDIMENTARY	UNKNOWN	UNKNOWN	MUDSTONE
C136782		USGS		Geochemistry of rock samples from the National Geochemical Database: U.S. Geological Survey, Reston, VA.	U.S. Geological Survey	USGS		42.1344	-111.26	0.01				AAS	SEDIMENTARY	UNKNOWN	UNKNOWN	MUDSTONE																														28.2
C136782		USGS		Geochemistry of rock samples from the National Geochemical Database: U.S. Geological Survey, Reston, VA.	U.S. Geological Survey	USGS		42.1344	-111.26	0.01				ICPAES	SEDIMENTARY	UNKNOWN	UNKNOWN	MUDSTONE																							2.38	134	283		95	6	1090	13	3
C136782		USGS		Geochemistry of rock samples from the National Geochemical Database: U.S. Geological Survey, Reston, VA.	U.S. Geological Survey	USGS		42.1344	-111.26	0.01				ISE	SEDIMENTARY	UNKNOWN	UNKNOWN	MUDSTONE
C136782		USGS		Geochemistry of rock samples from the National Geochemical Database: U.S. Geological Survey, Reston, VA.	U.S. Geological Survey	USGS		42.1344	-111.26	0.01				TITR	SEDIMENTARY	UNKNOWN	UNKNOWN	MUDSTONE
C136783		USGS		Geochemistry of rock samples from the National Geochemical Database: U.S. Geological Survey, Reston, VA.	U.S. Geological Survey	USGS		42.1344	-111.26	0.01				AAS	SEDIMENTARY	UNKNOWN	UNKNOWN	MUDSTONE																														23.6
C136783		USGS		Geochemistry of rock samples from the National Geochemical Database: U.S. Geological Survey, Reston, VA.	U.S. Geological Survey	USGS		42.1344	-111.26	0.01				ICPAES	SEDIMENTARY	UNKNOWN	UNKNOWN	MUDSTONE																							2.35	144	201	2	65	9	839	18
C136783		USGS		Geochemistry of rock samples from the National Geochemical Database: U.S. Geological Survey, Reston, VA.	U.S. Geological Survey	USGS		42.1344	-111.26	0.01				ISE	SEDIMENTARY	UNKNOWN	UNKNOWN	MUDSTONE
C136783		USGS		Geochemistry of rock samples from the National Geochemical Database: U.S. Geological Survey, Reston, VA.	U.S. Geological Survey	USGS		42.1344	-111.26	0.01				TITR	SEDIMENTARY	UNKNOWN	UNKNOWN	MUDSTONE
C136784		USGS		Geochemistry of rock samples from the National Geochemical Database: U.S. Geological Survey, Reston, VA.	U.S. Geological Survey	USGS		42.1344	-111.26	0.01				AAS	SEDIMENTARY	UNKNOWN	UNKNOWN	MUDSTONE																														17.2
C136784		USGS		Geochemistry of rock samples from the National Geochemical Database: U.S. Geological Survey, Reston, VA.	U.S. Geological Survey	USGS		42.1344	-111.26	0.01				ICPAES	SEDIMENTARY	UNKNOWN	UNKNOWN	MUDSTONE																							2.25	153	432		98	65	1790		8
C136784		USGS		Geochemistry of rock samples from the National Geochemical Database: U.S. Geological Survey, Reston, VA.	U.S. Geological Survey	USGS		42.1344	-111.26	0.01				ISE	SEDIMENTARY	UNKNOWN	UNKNOWN	MUDSTONE
C136784		USGS		Geochemistry of rock samples from the National Geochemical Database: U.S. Geological Survey, Reston, VA.	U.S. Geological Survey	USGS		42.1344	-111.26	0.01				TITR	SEDIMENTARY	UNKNOWN	UNKNOWN	MUDSTONE
C136785		USGS		Geochemistry of rock samples from the National Geochemical Database: U.S. Geological Survey, Reston, VA.	U.S. Geological Survey	USGS		42.1344	-111.26	0.01				AAS	SEDIMENTARY	UNKNOWN	UNKNOWN	MUDSTONE																														2.1
C136785		USGS		Geochemistry of rock samples from the National Geochemical Database: U.S. Geological Survey, Reston, VA.	U.S. Geological Survey	USGS		42.1344	-111.26	0.01				ICPAES	SEDIMENTARY	UNKNOWN	UNKNOWN	MUDSTONE																							0.31	113	13		16		51	19
C136785		USGS		Geochemistry of rock samples from the National Geochemical Database: U.S. Geological Survey, Reston, VA.	U.S. Geological Survey	USGS		42.1344	-111.26	0.01				ISE	SEDIMENTARY	UNKNOWN	UNKNOWN	MUDSTONE
C136785		USGS		Geochemistry of rock samples from the National Geochemical Database: U.S. Geological Survey, Reston, VA.	U.S. Geological Survey	USGS		42.1344	-111.26	0.01				TITR	SEDIMENTARY	UNKNOWN	UNKNOWN	MUDSTONE
C136786		USGS		Geochemistry of rock samples from the National Geochemical Database: U.S. Geological Survey, Reston, VA.	U.S. Geological Survey	USGS		42.1344	-111.26	0.01				TITR	SEDIMENTARY	UNKNOWN	UNKNOWN	MUDSTONE
C136786		USGS		Geochemistry of rock samples from the National Geochemical Database: U.S. Geological Survey, Reston, VA.	U.S. Geological Survey	USGS		42.1344	-111.26	0.01				AAS	SEDIMENTARY	UNKNOWN	UNKNOWN	MUDSTONE																														27.3
C136786		USGS		Geochemistry of rock samples from the National Geochemical Database: U.S. Geological Survey, Reston, VA.	U.S. Geological Survey	USGS		42.1344	-111.26	0.01				ICPAES	SEDIMENTARY	UNKNOWN	UNKNOWN	MUDSTONE																							2.27	123	343		113	9	1170		4
C136786		USGS		Geochemistry of rock samples from the National Geochemical Database: U.S. Geological Survey, Reston, VA.	U.S. Geological Survey	USGS		42.1344	-111.26	0.01				ISE	SEDIMENTARY	UNKNOWN	UNKNOWN	MUDSTONE
C136787		USGS		Geochemistry of rock samples from the National Geochemical Database: U.S. Geological Survey, Reston, VA.	U.S. Geological Survey	USGS		42.1344	-111.26	0.01				AAS	SEDIMENTARY	UNKNOWN	UNKNOWN	MUDSTONE																														21
C136787		USGS		Geochemistry of rock samples from the National Geochemical Database: U.S. Geological Survey, Reston, VA.	U.S. Geological Survey	USGS		42.1344	-111.26	0.01				ICPAES	SEDIMENTARY	UNKNOWN	UNKNOWN	MUDSTONE																							1.38	68	362		128	11	1210		5
C136787		USGS		Geochemistry of rock samples from the National Geochemical Database: U.S. Geological Survey, Reston, VA.	U.S. Geological Survey	USGS		42.1344	-111.26	0.01				ISE	SEDIMENTARY	UNKNOWN	UNKNOWN	MUDSTONE
C136787		USGS		Geochemistry of rock samples from the National Geochemical Database: U.S. Geological Survey, Reston, VA.	U.S. Geological Survey	USGS		42.1344	-111.26	0.01				TITR	SEDIMENTARY	UNKNOWN	UNKNOWN	MUDSTONE
C136788		USGS		Geochemistry of rock samples from the National Geochemical Database: U.S. Geological Survey, Reston, VA.	U.S. Geological Survey	USGS		42.1344	-111.26	0.01				AAS	SEDIMENTARY	UNKNOWN	UNKNOWN	MUDSTONE																														25.5
C136788		USGS		Geochemistry of rock samples from the National Geochemical Database: U.S. Geological Survey, Reston, VA.	U.S. Geological Survey	USGS		42.1344	-111.26	0.01				ICPAES	SEDIMENTARY	UNKNOWN	UNKNOWN	MUDSTONE																							2.36	195	183		46	10	424		3
C136788		USGS		Geochemistry of rock samples from the National Geochemical Database: U.S. Geological Survey, Reston, VA.	U.S. Geological Survey	USGS		42.1344	-111.26	0.01				ISE	SEDIMENTARY	UNKNOWN	UNKNOWN	MUDSTONE
C136788		USGS		Geochemistry of rock samples from the National Geochemical Database: U.S. Geological Survey, Reston, VA.	U.S. Geological Survey	USGS		42.1344	-111.26	0.01				TITR	SEDIMENTARY	UNKNOWN	UNKNOWN	MUDSTONE
C136789		USGS		Geochemistry of rock samples from the National Geochemical Database: U.S. Geological Survey, Reston, VA.	U.S. Geological Survey	USGS		42.1344	-111.26	0.01				AAS	SEDIMENTARY	UNKNOWN	UNKNOWN	MUDSTONE																														23.9
C136789		USGS		Geochemistry of rock samples from the National Geochemical Database: U.S. Geological Survey, Reston, VA.	U.S. Geological Survey	USGS		42.1344	-111.26	0.01				ICPAES	SEDIMENTARY	UNKNOWN	UNKNOWN	MUDSTONE																							0.63	16	434		145	45	1260
C136789		USGS		Geochemistry of rock samples from the National Geochemical Database: U.S. Geological Survey, Reston, VA.	U.S. Geological Survey	USGS		42.1344	-111.26	0.01				ISE	SEDIMENTARY	UNKNOWN	UNKNOWN	MUDSTONE
C136789		USGS		Geochemistry of rock samples from the National Geochemical Database: U.S. Geological Survey, Reston, VA.	U.S. Geological Survey	USGS		42.1344	-111.26	0.01				TITR	SEDIMENTARY	UNKNOWN	UNKNOWN	MUDSTONE
C136790		USGS		Geochemistry of rock samples from the National Geochemical Database: U.S. Geological Survey, Reston, VA.	U.S. Geological Survey	USGS		42.1344	-111.26	0.01				AAS	SEDIMENTARY	UNKNOWN	UNKNOWN	MUDSTONE																														16
C136790		USGS		Geochemistry of rock samples from the National Geochemical Database: U.S. Geological Survey, Reston, VA.	U.S. Geological Survey	USGS		42.1344	-111.26	0.01				ICPAES	SEDIMENTARY	UNKNOWN	UNKNOWN	MUDSTONE																							0.55	28	33		20	4	246	32
C136790		USGS		Geochemistry of rock samples from the National Geochemical Database: U.S. Geological Survey, Reston, VA.	U.S. Geological Survey	USGS		42.1344	-111.26	0.01				ISE	SEDIMENTARY	UNKNOWN	UNKNOWN	MUDSTONE
C136790		USGS		Geochemistry of rock samples from the National Geochemical Database: U.S. Geological Survey, Reston, VA.	U.S. Geological Survey	USGS		42.1344	-111.26	0.01				TITR	SEDIMENTARY	UNKNOWN	UNKNOWN	MUDSTONE
C136791		USGS		Geochemistry of rock samples from the National Geochemical Database: U.S. Geological Survey, Reston, VA.	U.S. Geological Survey	USGS		42.1344	-111.26	0.01				AAS	SEDIMENTARY	UNKNOWN	UNKNOWN	MUDSTONE																														6.7
C136791		USGS		Geochemistry of rock samples from the National Geochemical Database: U.S. Geological Survey, Reston, VA.	U.S. Geological Survey	USGS		42.1344	-111.26	0.01				ICPAES	SEDIMENTARY	UNKNOWN	UNKNOWN	MUDSTONE																							0.96	318	22		13		25	18
C136791		USGS		Geochemistry of rock samples from the National Geochemical Database: U.S. Geological Survey, Reston, VA.	U.S. Geological Survey	USGS		42.1344	-111.26	0.01				ISE	SEDIMENTARY	UNKNOWN	UNKNOWN	MUDSTONE
C136791		USGS		Geochemistry of rock samples from the National Geochemical Database: U.S. Geological Survey, Reston, VA.	U.S. Geological Survey	USGS		42.1344	-111.26	0.01				TITR	SEDIMENTARY	UNKNOWN	UNKNOWN	MUDSTONE
C136792		USGS		Geochemistry of rock samples from the National Geochemical Database: U.S. Geological Survey, Reston, VA.	U.S. Geological Survey	USGS		42.1344	-111.26	0.01				AAS	SEDIMENTARY	UNKNOWN	UNKNOWN	MUDSTONE																														12.1
C136792		USGS		Geochemistry of rock samples from the National Geochemical Database: U.S. Geological Survey, Reston, VA.	U.S. Geological Survey	USGS		42.1344	-111.26	0.01				ICPAES	SEDIMENTARY	UNKNOWN	UNKNOWN	MUDSTONE																							0.36	17	96		38	6	335	14
C136792		USGS		Geochemistry of rock samples from the National Geochemical Database: U.S. Geological Survey, Reston, VA.	U.S. Geological Survey	USGS		42.1344	-111.26	0.01				ISE	SEDIMENTARY	UNKNOWN	UNKNOWN	MUDSTONE
C136792		USGS		Geochemistry of rock samples from the National Geochemical Database: U.S. Geological Survey, Reston, VA.	U.S. Geological Survey	USGS		42.1344	-111.26	0.01				TITR	SEDIMENTARY	UNKNOWN	UNKNOWN	MUDSTONE
C136793		USGS		Geochemistry of rock samples from the National Geochemical Database: U.S. Geological Survey, Reston, VA.	U.S. Geological Survey	USGS		42.1344	-111.26	0.01				AAS	SEDIMENTARY	UNKNOWN	UNKNOWN	MUDSTONE																														17.8
C136793		USGS		Geochemistry of rock samples from the National Geochemical Database: U.S. Geological Survey, Reston, VA.	U.S. Geological Survey	USGS		42.1344	-111.26	0.01				ICPAES	SEDIMENTARY	UNKNOWN	UNKNOWN	MUDSTONE																							1.56	142	237		89	28	786	13	6
C136793		USGS		Geochemistry of rock samples from the National Geochemical Database: U.S. Geological Survey, Reston, VA.	U.S. Geological Survey	USGS		42.1344	-111.26	0.01				ISE	SEDIMENTARY	UNKNOWN	UNKNOWN	MUDSTONE
C136793		USGS		Geochemistry of rock samples from the National Geochemical Database: U.S. Geological Survey, Reston, VA.	U.S. Geological Survey	USGS		42.1344	-111.26	0.01				TITR	SEDIMENTARY	UNKNOWN	UNKNOWN	MUDSTONE
C136794		USGS		Geochemistry of rock samples from the National Geochemical Database: U.S. Geological Survey, Reston, VA.	U.S. Geological Survey	USGS		42.1344	-111.26	0.01				AAS	SEDIMENTARY	UNKNOWN	UNKNOWN	MUDSTONE																														14.3
C136794		USGS		Geochemistry of rock samples from the National Geochemical Database: U.S. Geological Survey, Reston, VA.	U.S. Geological Survey	USGS		42.1344	-111.26	0.01				ICPAES	SEDIMENTARY	UNKNOWN	UNKNOWN	MUDSTONE																							0.39	52	146		69	7	460
C136794		USGS		Geochemistry of rock samples from the National Geochemical Database: U.S. Geological Survey, Reston, VA.	U.S. Geological Survey	USGS		42.1344	-111.26	0.01				ISE	SEDIMENTARY	UNKNOWN	UNKNOWN	MUDSTONE
C136794		USGS		Geochemistry of rock samples from the National Geochemical Database: U.S. Geological Survey, Reston, VA.	U.S. Geological Survey	USGS		42.1344	-111.26	0.01				TITR	SEDIMENTARY	UNKNOWN	UNKNOWN	MUDSTONE
C136795		USGS		Geochemistry of rock samples from the National Geochemical Database: U.S. Geological Survey, Reston, VA.	U.S. Geological Survey	USGS		42.1344	-111.26	0.01				AAS	SEDIMENTARY	UNKNOWN	UNKNOWN	MUDSTONE																														34.6
C136795		USGS		Geochemistry of rock samples from the National Geochemical Database: U.S. Geological Survey, Reston, VA.	U.S. Geological Survey	USGS		42.1344	-111.26	0.01				ICPAES	SEDIMENTARY	UNKNOWN	UNKNOWN	MUDSTONE																							1.14	76	80		37	4	218	18
C136795		USGS		Geochemistry of rock samples from the National Geochemical Database: U.S. Geological Survey, Reston, VA.	U.S. Geological Survey	USGS		42.1344	-111.26	0.01				ISE	SEDIMENTARY	UNKNOWN	UNKNOWN	MUDSTONE
C136795		USGS		Geochemistry of rock samples from the National Geochemical Database: U.S. Geological Survey, Reston, VA.	U.S. Geological Survey	USGS		42.1344	-111.26	0.01				TITR	SEDIMENTARY	UNKNOWN	UNKNOWN	MUDSTONE
C136796		USGS		Geochemistry of rock samples from the National Geochemical Database: U.S. Geological Survey, Reston, VA.	U.S. Geological Survey	USGS		42.1344	-111.26	0.01				AAS	SEDIMENTARY	UNKNOWN	UNKNOWN	MUDSTONE																														26.4
C136796		USGS		Geochemistry of rock samples from the National Geochemical Database: U.S. Geological Survey, Reston, VA.	U.S. Geological Survey	USGS		42.1344	-111.26	0.01				ICPAES	SEDIMENTARY	UNKNOWN	UNKNOWN	MUDSTONE																							1.58	130	213		96	50	1210	29	4
C136796		USGS		Geochemistry of rock samples from the National Geochemical Database: U.S. Geological Survey, Reston, VA.	U.S. Geological Survey	USGS		42.1344	-111.26	0.01				ISE	SEDIMENTARY	UNKNOWN	UNKNOWN	MUDSTONE
C136796		USGS		Geochemistry of rock samples from the National Geochemical Database: U.S. Geological Survey, Reston, VA.	U.S. Geological Survey	USGS		42.1344	-111.26	0.01				TITR	SEDIMENTARY	UNKNOWN	UNKNOWN	MUDSTONE
C136797		USGS		Geochemistry of rock samples from the National Geochemical Database: U.S. Geological Survey, Reston, VA.	U.S. Geological Survey	USGS		42.1344	-111.26	0.01				AAS	SEDIMENTARY	UNKNOWN	UNKNOWN	MUDSTONE																														35.8
C136797		USGS		Geochemistry of rock samples from the National Geochemical Database: U.S. Geological Survey, Reston, VA.	U.S. Geological Survey	USGS		42.1344	-111.26	0.01				ICPAES	SEDIMENTARY	UNKNOWN	UNKNOWN	MUDSTONE																							1.96	157	199		93	10	758	32	4
C136797		USGS		Geochemistry of rock samples from the National Geochemical Database: U.S. Geological Survey, Reston, VA.	U.S. Geological Survey	USGS		42.1344	-111.26	0.01				ISE	SEDIMENTARY	UNKNOWN	UNKNOWN	MUDSTONE
C136797		USGS		Geochemistry of rock samples from the National Geochemical Database: U.S. Geological Survey, Reston, VA.	U.S. Geological Survey	USGS		42.1344	-111.26	0.01				TITR	SEDIMENTARY	UNKNOWN	UNKNOWN	MUDSTONE
C136798		USGS		Geochemistry of rock samples from the National Geochemical Database: U.S. Geological Survey, Reston, VA.	U.S. Geological Survey	USGS		42.1344	-111.26	0.01				AAS	SEDIMENTARY	UNKNOWN	UNKNOWN	MUDSTONE																														26
C136798		USGS		Geochemistry of rock samples from the National Geochemical Database: U.S. Geological Survey, Reston, VA.	U.S. Geological Survey	USGS		42.1344	-111.26	0.01				ICPAES	SEDIMENTARY	UNKNOWN	UNKNOWN	MUDSTONE																							0.98	389	27	2	18	2	59	37
C136798		USGS		Geochemistry of rock samples from the National Geochemical Database: U.S. Geological Survey, Reston, VA.	U.S. Geological Survey	USGS		42.1344	-111.26	0.01				ISE	SEDIMENTARY	UNKNOWN	UNKNOWN	MUDSTONE
C136798		USGS		Geochemistry of rock samples from the National Geochemical Database: U.S. Geological Survey, Reston, VA.	U.S. Geological Survey	USGS		42.1344	-111.26	0.01				TITR	SEDIMENTARY	UNKNOWN	UNKNOWN	MUDSTONE
C136799		USGS		Geochemistry of rock samples from the National Geochemical Database: U.S. Geological Survey, Reston, VA.	U.S. Geological Survey	USGS		42.1344	-111.26	0.01				AAS	SEDIMENTARY	UNKNOWN	UNKNOWN	MUDSTONE																														47.1
C136799		USGS		Geochemistry of rock samples from the National Geochemical Database: U.S. Geological Survey, Reston, VA.	U.S. Geological Survey	USGS		42.1344	-111.26	0.01				ICPAES	SEDIMENTARY	UNKNOWN	UNKNOWN	MUDSTONE																							1.72	93	170		65	37	923	35	3
C136799		USGS		Geochemistry of rock samples from the National Geochemical Database: U.S. Geological Survey, Reston, VA.	U.S. Geological Survey	USGS		42.1344	-111.26	0.01				ISE	SEDIMENTARY	UNKNOWN	UNKNOWN	MUDSTONE
C136799		USGS		Geochemistry of rock samples from the National Geochemical Database: U.S. Geological Survey, Reston, VA.	U.S. Geological Survey	USGS		42.1344	-111.26	0.01				TITR	SEDIMENTARY	UNKNOWN	UNKNOWN	MUDSTONE
C136800		USGS		Geochemistry of rock samples from the National Geochemical Database: U.S. Geological Survey, Reston, VA.	U.S. Geological Survey	USGS		42.1344	-111.26	0.01				AAS	SEDIMENTARY	UNKNOWN	UNKNOWN	MUDSTONE																														31.8
C136800		USGS		Geochemistry of rock samples from the National Geochemical Database: U.S. Geological Survey, Reston, VA.	U.S. Geological Survey	USGS		42.1344	-111.26	0.01				ICPAES	SEDIMENTARY	UNKNOWN	UNKNOWN	MUDSTONE																							0.32	24	259		86	281	6600	36
C136800		USGS		Geochemistry of rock samples from the National Geochemical Database: U.S. Geological Survey, Reston, VA.	U.S. Geological Survey	USGS		42.1344	-111.26	0.01				ISE	SEDIMENTARY	UNKNOWN	UNKNOWN	MUDSTONE
C136800		USGS		Geochemistry of rock samples from the National Geochemical Database: U.S. Geological Survey, Reston, VA.	U.S. Geological Survey	USGS		42.1344	-111.26	0.01				TITR	SEDIMENTARY	UNKNOWN	UNKNOWN	MUDSTONE
C136801		USGS		Geochemistry of rock samples from the National Geochemical Database: U.S. Geological Survey, Reston, VA.	U.S. Geological Survey	USGS		42.1344	-111.26	0.01				AAS	SEDIMENTARY	UNKNOWN	UNKNOWN	MUDSTONE																														25.7
C136801		USGS		Geochemistry of rock samples from the National Geochemical Database: U.S. Geological Survey, Reston, VA.	U.S. Geological Survey	USGS		42.1344	-111.26	0.01				ICPAES	SEDIMENTARY	UNKNOWN	UNKNOWN	MUDSTONE																							2.18	256	63	7	23	3	123	20
C136801		USGS		Geochemistry of rock samples from the National Geochemical Database: U.S. Geological Survey, Reston, VA.	U.S. Geological Survey	USGS		42.1344	-111.26	0.01				ISE	SEDIMENTARY	UNKNOWN	UNKNOWN	MUDSTONE
C136801		USGS		Geochemistry of rock samples from the National Geochemical Database: U.S. Geological Survey, Reston, VA.	U.S. Geological Survey	USGS		42.1344	-111.26	0.01				TITR	SEDIMENTARY	UNKNOWN	UNKNOWN	MUDSTONE
C136802		USGS		Geochemistry of rock samples from the National Geochemical Database: U.S. Geological Survey, Reston, VA.	U.S. Geological Survey	USGS		42.1344	-111.26	0.01				AAS	SEDIMENTARY	UNKNOWN	UNKNOWN	MUDSTONE																														16
C136802		USGS		Geochemistry of rock samples from the National Geochemical Database: U.S. Geological Survey, Reston, VA.	U.S. Geological Survey	USGS		42.1344	-111.26	0.01				ICPAES	SEDIMENTARY	UNKNOWN	UNKNOWN	MUDSTONE																							1.88	169	138		39	6	320	18
C136802		USGS		Geochemistry of rock samples from the National Geochemical Database: U.S. Geological Survey, Reston, VA.	U.S. Geological Survey	USGS		42.1344	-111.26	0.01				ISE	SEDIMENTARY	UNKNOWN	UNKNOWN	MUDSTONE
C136802		USGS		Geochemistry of rock samples from the National Geochemical Database: U.S. Geological Survey, Reston, VA.	U.S. Geological Survey	USGS		42.1344	-111.26	0.01				TITR	SEDIMENTARY	UNKNOWN	UNKNOWN	MUDSTONE
C136803		USGS		Geochemistry of rock samples from the National Geochemical Database: U.S. Geological Survey, Reston, VA.	U.S. Geological Survey	USGS		42.1344	-111.26	0.01				AAS	SEDIMENTARY	UNKNOWN	UNKNOWN	MUDSTONE																														12.3
C136803		USGS		Geochemistry of rock samples from the National Geochemical Database: U.S. Geological Survey, Reston, VA.	U.S. Geological Survey	USGS		42.1344	-111.26	0.01				ICPAES	SEDIMENTARY	UNKNOWN	UNKNOWN	MUDSTONE																							0.83	49	109		50	12	599	28
C136803		USGS		Geochemistry of rock samples from the National Geochemical Database: U.S. Geological Survey, Reston, VA.	U.S. Geological Survey	USGS		42.1344	-111.26	0.01				ISE	SEDIMENTARY	UNKNOWN	UNKNOWN	MUDSTONE
C136803		USGS		Geochemistry of rock samples from the National Geochemical Database: U.S. Geological Survey, Reston, VA.	U.S. Geological Survey	USGS		42.1344	-111.26	0.01				TITR	SEDIMENTARY	UNKNOWN	UNKNOWN	MUDSTONE
C136804		USGS		Geochemistry of rock samples from the National Geochemical Database: U.S. Geological Survey, Reston, VA.	U.S. Geological Survey	USGS		42.1344	-111.26	0.01				AAS	SEDIMENTARY	UNKNOWN	UNKNOWN	MUDSTONE																														20.4
C136804		USGS		Geochemistry of rock samples from the National Geochemical Database: U.S. Geological Survey, Reston, VA.	U.S. Geological Survey	USGS		42.1344	-111.26	0.01				ICPAES	SEDIMENTARY	UNKNOWN	UNKNOWN	MUDSTONE																							0.65	33	261		136	8	1210		3
C136804		USGS		Geochemistry of rock samples from the National Geochemical Database: U.S. Geological Survey, Reston, VA.	U.S. Geological Survey	USGS		42.1344	-111.26	0.01				ISE	SEDIMENTARY	UNKNOWN	UNKNOWN	MUDSTONE
C136804		USGS		Geochemistry of rock samples from the National Geochemical Database: U.S. Geological Survey, Reston, VA.	U.S. Geological Survey	USGS		42.1344	-111.26	0.01				TITR	SEDIMENTARY	UNKNOWN	UNKNOWN	MUDSTONE
C136805		USGS		Geochemistry of rock samples from the National Geochemical Database: U.S. Geological Survey, Reston, VA.	U.S. Geological Survey	USGS		42.1344	-111.26	0.01				AAS	SEDIMENTARY	UNKNOWN	UNKNOWN	MUDSTONE																														51
C136805		USGS		Geochemistry of rock samples from the National Geochemical Database: U.S. Geological Survey, Reston, VA.	U.S. Geological Survey	USGS		42.1344	-111.26	0.01				ICPAES	SEDIMENTARY	UNKNOWN	UNKNOWN	MUDSTONE																							1.38	79	264		107	7	1230	21	3
C136805		USGS		Geochemistry of rock samples from the National Geochemical Database: U.S. Geological Survey, Reston, VA.	U.S. Geological Survey	USGS		42.1344	-111.26	0.01				ISE	SEDIMENTARY	UNKNOWN	UNKNOWN	MUDSTONE
C136805		USGS		Geochemistry of rock samples from the National Geochemical Database: U.S. Geological Survey, Reston, VA.	U.S. Geological Survey	USGS		42.1344	-111.26	0.01				TITR	SEDIMENTARY	UNKNOWN	UNKNOWN	MUDSTONE
C136806		USGS		Geochemistry of rock samples from the National Geochemical Database: U.S. Geological Survey, Reston, VA.	U.S. Geological Survey	USGS		42.1344	-111.26	0.01				AAS	SEDIMENTARY	UNKNOWN	UNKNOWN	MUDSTONE																														23.9
C136806		USGS		Geochemistry of rock samples from the National Geochemical Database: U.S. Geological Survey, Reston, VA.	U.S. Geological Survey	USGS		42.1344	-111.26	0.01				ICPAES	SEDIMENTARY	UNKNOWN	UNKNOWN	MUDSTONE																							1.66	179	126		56	3	453		2
C136806		USGS		Geochemistry of rock samples from the National Geochemical Database: U.S. Geological Survey, Reston, VA.	U.S. Geological Survey	USGS		42.1344	-111.26	0.01				ISE	SEDIMENTARY	UNKNOWN	UNKNOWN	MUDSTONE
C136806		USGS		Geochemistry of rock samples from the National Geochemical Database: U.S. Geological Survey, Reston, VA.	U.S. Geological Survey	USGS		42.1344	-111.26	0.01				TITR	SEDIMENTARY	UNKNOWN	UNKNOWN	MUDSTONE
C136807		USGS		Geochemistry of rock samples from the National Geochemical Database: U.S. Geological Survey, Reston, VA.	U.S. Geological Survey	USGS		42.1344	-111.26	0.01				AAS	SEDIMENTARY	UNKNOWN	UNKNOWN	MUDSTONE																														23.2
C136807		USGS		Geochemistry of rock samples from the National Geochemical Database: U.S. Geological Survey, Reston, VA.	U.S. Geological Survey	USGS		42.1344	-111.26	0.01				ICPAES	SEDIMENTARY	UNKNOWN	UNKNOWN	MUDSTONE																							1.82	293	41	4	22		86	22
C136807		USGS		Geochemistry of rock samples from the National Geochemical Database: U.S. Geological Survey, Reston, VA.	U.S. Geological Survey	USGS		42.1344	-111.26	0.01				ISE	SEDIMENTARY	UNKNOWN	UNKNOWN	MUDSTONE
C136807		USGS		Geochemistry of rock samples from the National Geochemical Database: U.S. Geological Survey, Reston, VA.	U.S. Geological Survey	USGS		42.1344	-111.26	0.01				TITR	SEDIMENTARY	UNKNOWN	UNKNOWN	MUDSTONE
C136808		USGS		Geochemistry of rock samples from the National Geochemical Database: U.S. Geological Survey, Reston, VA.	U.S. Geological Survey	USGS		42.1344	-111.26	0.01				AAS	SEDIMENTARY	UNKNOWN	UNKNOWN	MUDSTONE																														28.3
C136808		USGS		Geochemistry of rock samples from the National Geochemical Database: U.S. Geological Survey, Reston, VA.	U.S. Geological Survey	USGS		42.1344	-111.26	0.01				ICPAES	SEDIMENTARY	UNKNOWN	UNKNOWN	MUDSTONE																							0.93	52	286		82	67	1440	27	4
C136808		USGS		Geochemistry of rock samples from the National Geochemical Database: U.S. Geological Survey, Reston, VA.	U.S. Geological Survey	USGS		42.1344	-111.26	0.01				ISE	SEDIMENTARY	UNKNOWN	UNKNOWN	MUDSTONE
C136808		USGS		Geochemistry of rock samples from the National Geochemical Database: U.S. Geological Survey, Reston, VA.	U.S. Geological Survey	USGS		42.1344	-111.26	0.01				TITR	SEDIMENTARY	UNKNOWN	UNKNOWN	MUDSTONE
C136809		USGS		Geochemistry of rock samples from the National Geochemical Database: U.S. Geological Survey, Reston, VA.	U.S. Geological Survey	USGS		42.1344	-111.26	0.01				AAS	SEDIMENTARY	UNKNOWN	UNKNOWN	MUDSTONE																														26.7
C136809		USGS		Geochemistry of rock samples from the National Geochemical Database: U.S. Geological Survey, Reston, VA.	U.S. Geological Survey	USGS		42.1344	-111.26	0.01				ICPAES	SEDIMENTARY	UNKNOWN	UNKNOWN	MUDSTONE																							0.76	50	249		79	84	1630	34	5
C136809		USGS		Geochemistry of rock samples from the National Geochemical Database: U.S. Geological Survey, Reston, VA.	U.S. Geological Survey	USGS		42.1344	-111.26	0.01				ISE	SEDIMENTARY	UNKNOWN	UNKNOWN	MUDSTONE
C136809		USGS		Geochemistry of rock samples from the National Geochemical Database: U.S. Geological Survey, Reston, VA.	U.S. Geological Survey	USGS		42.1344	-111.26	0.01				TITR	SEDIMENTARY	UNKNOWN	UNKNOWN	MUDSTONE
C136810		USGS		Geochemistry of rock samples from the National Geochemical Database: U.S. Geological Survey, Reston, VA.	U.S. Geological Survey	USGS		42.1344	-111.26	0.01				AAS	SEDIMENTARY	UNKNOWN	UNKNOWN	MUDSTONE																														28.8
C136810		USGS		Geochemistry of rock samples from the National Geochemical Database: U.S. Geological Survey, Reston, VA.	U.S. Geological Survey	USGS		42.1344	-111.26	0.01				ICPAES	SEDIMENTARY	UNKNOWN	UNKNOWN	MUDSTONE																							0.85	55	301		78	234	3180	33	5
C136810		USGS		Geochemistry of rock samples from the National Geochemical Database: U.S. Geological Survey, Reston, VA.	U.S. Geological Survey	USGS		42.1344	-111.26	0.01				ISE	SEDIMENTARY	UNKNOWN	UNKNOWN	MUDSTONE
C136810		USGS		Geochemistry of rock samples from the National Geochemical Database: U.S. Geological Survey, Reston, VA.	U.S. Geological Survey	USGS		42.1344	-111.26	0.01				TITR	SEDIMENTARY	UNKNOWN	UNKNOWN	MUDSTONE
C136811		USGS		Geochemistry of rock samples from the National Geochemical Database: U.S. Geological Survey, Reston, VA.	U.S. Geological Survey	USGS		42.1344	-111.26	0.01				AAS	SEDIMENTARY	UNKNOWN	UNKNOWN	MUDSTONE																														3.1
C136811		USGS		Geochemistry of rock samples from the National Geochemical Database: U.S. Geological Survey, Reston, VA.	U.S. Geological Survey	USGS		42.1344	-111.26	0.01				ICPAES	SEDIMENTARY	UNKNOWN	UNKNOWN	MUDSTONE																							0.11	15	58		29	92	1820
C136811		USGS		Geochemistry of rock samples from the National Geochemical Database: U.S. Geological Survey, Reston, VA.	U.S. Geological Survey	USGS		42.1344	-111.26	0.01				ISE	SEDIMENTARY	UNKNOWN	UNKNOWN	MUDSTONE
C136811		USGS		Geochemistry of rock samples from the National Geochemical Database: U.S. Geological Survey, Reston, VA.	U.S. Geological Survey	USGS		42.1344	-111.26	0.01				TITR	SEDIMENTARY	UNKNOWN	UNKNOWN	MUDSTONE
C136812		USGS		Geochemistry of rock samples from the National Geochemical Database: U.S. Geological Survey, Reston, VA.	U.S. Geological Survey	USGS		42.1344	-111.26	0.01				AAS	SEDIMENTARY	UNKNOWN	UNKNOWN	MUDSTONE																														21.9
C136812		USGS		Geochemistry of rock samples from the National Geochemical Database: U.S. Geological Survey, Reston, VA.	U.S. Geological Survey	USGS		42.1344	-111.26	0.01				ICPAES	SEDIMENTARY	UNKNOWN	UNKNOWN	MUDSTONE																							2.1	202	88	4	40	5	246	16
C136812		USGS		Geochemistry of rock samples from the National Geochemical Database: U.S. Geological Survey, Reston, VA.	U.S. Geological Survey	USGS		42.1344	-111.26	0.01				ISE	SEDIMENTARY	UNKNOWN	UNKNOWN	MUDSTONE
C136812		USGS		Geochemistry of rock samples from the National Geochemical Database: U.S. Geological Survey, Reston, VA.	U.S. Geological Survey	USGS		42.1344	-111.26	0.01				TITR	SEDIMENTARY	UNKNOWN	UNKNOWN	MUDSTONE
C136813		USGS		Geochemistry of rock samples from the National Geochemical Database: U.S. Geological Survey, Reston, VA.	U.S. Geological Survey	USGS		42.1344	-111.26	0.01				AAS	SEDIMENTARY	UNKNOWN	UNKNOWN	MUDSTONE																														6.1
C136813		USGS		Geochemistry of rock samples from the National Geochemical Database: U.S. Geological Survey, Reston, VA.	U.S. Geological Survey	USGS		42.1344	-111.26	0.01				ICPAES	SEDIMENTARY	UNKNOWN	UNKNOWN	MUDSTONE																							0.6	312	26		17		96	19
C136813		USGS		Geochemistry of rock samples from the National Geochemical Database: U.S. Geological Survey, Reston, VA.	U.S. Geological Survey	USGS		42.1344	-111.26	0.01				ISE	SEDIMENTARY	UNKNOWN	UNKNOWN	MUDSTONE
C136813		USGS		Geochemistry of rock samples from the National Geochemical Database: U.S. Geological Survey, Reston, VA.	U.S. Geological Survey	USGS		42.1344	-111.26	0.01				TITR	SEDIMENTARY	UNKNOWN	UNKNOWN	MUDSTONE
C139262		USGS		Geochemistry of rock samples from the National Geochemical Database: U.S. Geological Survey, Reston, VA.	U.S. Geological Survey	USGS		40.5125	-110.562	0.01	71	71	71	AAS	SEDIMENTARY	UNKNOWN	UNKNOWN	MUDSTONE
C139264		USGS		Geochemistry of rock samples from the National Geochemical Database: U.S. Geological Survey, Reston, VA.	U.S. Geological Survey	USGS		40.5125	-110.562	0.01	71	71	71	AAS	SEDIMENTARY	UNKNOWN	UNKNOWN	MUDSTONE
C139266		USGS		Geochemistry of rock samples from the National Geochemical Database: U.S. Geological Survey, Reston, VA.	U.S. Geological Survey	USGS		40.5125	-110.562	0.01	71	71	71	AAS	SEDIMENTARY	UNKNOWN	UNKNOWN	MUDSTONE
C139267		USGS		Geochemistry of rock samples from the National Geochemical Database: U.S. Geological Survey, Reston, VA.	U.S. Geological Survey	USGS		40.5125	-110.562	0.01	71	71	71	AAS	SEDIMENTARY	UNKNOWN	UNKNOWN	MUDSTONE
C139268		USGS		Geochemistry of rock samples from the National Geochemical Database: U.S. Geological Survey, Reston, VA.	U.S. Geological Survey	USGS		40.5125	-110.562	0.01	71	71	71	AAS	SEDIMENTARY	UNKNOWN	UNKNOWN	MUDSTONE
C139271		USGS		Geochemistry of rock samples from the National Geochemical Database: U.S. Geological Survey, Reston, VA.	U.S. Geological Survey	USGS		40.5125	-110.562	0.01	71	71	71	AAS	SEDIMENTARY	UNKNOWN	UNKNOWN	MUDSTONE
C139273		USGS		Geochemistry of rock samples from the National Geochemical Database: U.S. Geological Survey, Reston, VA.	U.S. Geological Survey	USGS		40.5125	-110.562	0.01	71	71	71	AAS	SEDIMENTARY	UNKNOWN	UNKNOWN	MUDSTONE
C139274		USGS		Geochemistry of rock samples from the National Geochemical Database: U.S. Geological Survey, Reston, VA.	U.S. Geological Survey	USGS		40.5125	-110.562	0.01	71	71	71	AAS	SEDIMENTARY	UNKNOWN	UNKNOWN	MUDSTONE
C139275		USGS		Geochemistry of rock samples from the National Geochemical Database: U.S. Geological Survey, Reston, VA.	U.S. Geological Survey	USGS		40.5125	-110.562	0.01	71	71	71	AAS	SEDIMENTARY	UNKNOWN	UNKNOWN	MUDSTONE
C139277		USGS		Geochemistry of rock samples from the National Geochemical Database: U.S. Geological Survey, Reston, VA.	U.S. Geological Survey	USGS		40.5125	-110.562	0.01	71	71	71	AAS	SEDIMENTARY	UNKNOWN	UNKNOWN	MUDSTONE
C139278		USGS		Geochemistry of rock samples from the National Geochemical Database: U.S. Geological Survey, Reston, VA.	U.S. Geological Survey	USGS		40.5125	-110.562	0.01	71	71	71	AAS	SEDIMENTARY	UNKNOWN	UNKNOWN	MUDSTONE
C139280		USGS		Geochemistry of rock samples from the National Geochemical Database: U.S. Geological Survey, Reston, VA.	U.S. Geological Survey	USGS		40.5125	-110.562	0.01	71	71	71	AAS	SEDIMENTARY	UNKNOWN	UNKNOWN	MUDSTONE
C139282		USGS		Geochemistry of rock samples from the National Geochemical Database: U.S. Geological Survey, Reston, VA.	U.S. Geological Survey	USGS		40.5125	-110.562	0.01	71	71	71	AAS	SEDIMENTARY	UNKNOWN	UNKNOWN	MUDSTONE
C139285		USGS		Geochemistry of rock samples from the National Geochemical Database: U.S. Geological Survey, Reston, VA.	U.S. Geological Survey	USGS		42.1458	-110.692	0.01	71	71	71	AAS	SEDIMENTARY	UNKNOWN	UNKNOWN	MUDSTONE
C139286		USGS		Geochemistry of rock samples from the National Geochemical Database: U.S. Geological Survey, Reston, VA.	U.S. Geological Survey	USGS		42.1458	-110.692	0.01	71	71	71	AAS	SEDIMENTARY	UNKNOWN	UNKNOWN	MUDSTONE
C139290		USGS		Geochemistry of rock samples from the National Geochemical Database: U.S. Geological Survey, Reston, VA.	U.S. Geological Survey	USGS		42.1458	-110.692	0.01	70	70	70	AAS	SEDIMENTARY	UNKNOWN	UNKNOWN	MUDSTONE
C139291		USGS		Geochemistry of rock samples from the National Geochemical Database: U.S. Geological Survey, Reston, VA.	U.S. Geological Survey	USGS		42.1458	-110.692	0.01	71	71	71	AAS	SEDIMENTARY	UNKNOWN	UNKNOWN	MUDSTONE
C139292		USGS		Geochemistry of rock samples from the National Geochemical Database: U.S. Geological Survey, Reston, VA.	U.S. Geological Survey	USGS		42.1458	-110.692	0.01	71	71	71	AAS	SEDIMENTARY	UNKNOWN	UNKNOWN	MUDSTONE
C139293		USGS		Geochemistry of rock samples from the National Geochemical Database: U.S. Geological Survey, Reston, VA.	U.S. Geological Survey	USGS		42.1458	-110.692	0.01	71	71	71	AAS	SEDIMENTARY	UNKNOWN	UNKNOWN	MUDSTONE
C139294		USGS		Geochemistry of rock samples from the National Geochemical Database: U.S. Geological Survey, Reston, VA.	U.S. Geological Survey	USGS		42.1458	-110.692	0.01	71	71	71	AAS	SEDIMENTARY	UNKNOWN	UNKNOWN	MUDSTONE
C139295		USGS		Geochemistry of rock samples from the National Geochemical Database: U.S. Geological Survey, Reston, VA.	U.S. Geological Survey	USGS		42.1458	-110.692	0.01	71	71	71	AAS	SEDIMENTARY	UNKNOWN	UNKNOWN	MUDSTONE
C139296		USGS		Geochemistry of rock samples from the National Geochemical Database: U.S. Geological Survey, Reston, VA.	U.S. Geological Survey	USGS		42.1458	-110.692	0.01	71	71	71	AAS	SEDIMENTARY	UNKNOWN	UNKNOWN	MUDSTONE
C139297		USGS		Geochemistry of rock samples from the National Geochemical Database: U.S. Geological Survey, Reston, VA.	U.S. Geological Survey	USGS		42.1458	-110.692	0.01	71	71	71	AAS	SEDIMENTARY	UNKNOWN	UNKNOWN	MUDSTONE
C139298		USGS		Geochemistry of rock samples from the National Geochemical Database: U.S. Geological Survey, Reston, VA.	U.S. Geological Survey	USGS		42.1458	-110.692	0.01	71	71	71	AAS	SEDIMENTARY	UNKNOWN	UNKNOWN	MUDSTONE
C139299		USGS		Geochemistry of rock samples from the National Geochemical Database: U.S. Geological Survey, Reston, VA.	U.S. Geological Survey	USGS		42.1458	-110.692	0.01	71	71	71	AAS	SEDIMENTARY	UNKNOWN	UNKNOWN	MUDSTONE
C139315		USGS		Geochemistry of rock samples from the National Geochemical Database: U.S. Geological Survey, Reston, VA.	U.S. Geological Survey	USGS		42.1458	-110.692	0.01	71	71	71	AAS	SEDIMENTARY	UNKNOWN	UNKNOWN	MUDSTONE
C139319		USGS		Geochemistry of rock samples from the National Geochemical Database: U.S. Geological Survey, Reston, VA.	U.S. Geological Survey	USGS		42.1458	-110.692	0.01	71	71	71	AAS	SEDIMENTARY	UNKNOWN	UNKNOWN	MUDSTONE
C139321		USGS		Geochemistry of rock samples from the National Geochemical Database: U.S. Geological Survey, Reston, VA.	U.S. Geological Survey	USGS		42.1458	-110.692	0.01	71	71	71	AAS	SEDIMENTARY	UNKNOWN	UNKNOWN	MUDSTONE
C139324		USGS		Geochemistry of rock samples from the National Geochemical Database: U.S. Geological Survey, Reston, VA.	U.S. Geological Survey	USGS		42.1458	-110.692	0.01	71	71	71	AAS	SEDIMENTARY	UNKNOWN	UNKNOWN	MUDSTONE
C139325		USGS		Geochemistry of rock samples from the National Geochemical Database: U.S. Geological Survey, Reston, VA.	U.S. Geological Survey	USGS		42.1458	-110.692	0.01	71	71	71	AAS	SEDIMENTARY	UNKNOWN	UNKNOWN	MUDSTONE
C139326		USGS		Geochemistry of rock samples from the National Geochemical Database: U.S. Geological Survey, Reston, VA.	U.S. Geological Survey	USGS		42.1458	-110.692	0.01	71	71	71	AAS	SEDIMENTARY	UNKNOWN	UNKNOWN	MUDSTONE
C139327		USGS		Geochemistry of rock samples from the National Geochemical Database: U.S. Geological Survey, Reston, VA.	U.S. Geological Survey	USGS		42.1458	-110.692	0.01	71	71	71	AAS	SEDIMENTARY	UNKNOWN	UNKNOWN	MUDSTONE
C139328		USGS		Geochemistry of rock samples from the National Geochemical Database: U.S. Geological Survey, Reston, VA.	U.S. Geological Survey	USGS		42.1458	-110.692	0.01	71	71	71	AAS	SEDIMENTARY	UNKNOWN	UNKNOWN	MUDSTONE
C139330		USGS		Geochemistry of rock samples from the National Geochemical Database: U.S. Geological Survey, Reston, VA.	U.S. Geological Survey	USGS		42.1458	-110.692	0.01	71	71	71	AAS	SEDIMENTARY	UNKNOWN	UNKNOWN	MUDSTONE
C139331		USGS		Geochemistry of rock samples from the National Geochemical Database: U.S. Geological Survey, Reston, VA.	U.S. Geological Survey	USGS		42.1458	-110.692	0.01	71	71	71	AAS	SEDIMENTARY	UNKNOWN	UNKNOWN	MUDSTONE
C139332		USGS		Geochemistry of rock samples from the National Geochemical Database: U.S. Geological Survey, Reston, VA.	U.S. Geological Survey	USGS		42.1458	-110.692	0.01	71	71	71	AAS	SEDIMENTARY	UNKNOWN	UNKNOWN	MUDSTONE
C139333		USGS		Geochemistry of rock samples from the National Geochemical Database: U.S. Geological Survey, Reston, VA.	U.S. Geological Survey	USGS		42.1458	-110.692	0.01	71	71	71	AAS	SEDIMENTARY	UNKNOWN	UNKNOWN	MUDSTONE
C139334		USGS		Geochemistry of rock samples from the National Geochemical Database: U.S. Geological Survey, Reston, VA.	U.S. Geological Survey	USGS		42.1458	-110.692	0.01	71	71	71	AAS	SEDIMENTARY	UNKNOWN	UNKNOWN	MUDSTONE
C139335		USGS		Geochemistry of rock samples from the National Geochemical Database: U.S. Geological Survey, Reston, VA.	U.S. Geological Survey	USGS		42.1458	-110.692	0.01	71	71	71	AAS	SEDIMENTARY	UNKNOWN	UNKNOWN	MUDSTONE
C139338		USGS		Geochemistry of rock samples from the National Geochemical Database: U.S. Geological Survey, Reston, VA.	U.S. Geological Survey	USGS		42.1458	-110.692	0.01	71	71	71	AAS	SEDIMENTARY	UNKNOWN	UNKNOWN	MUDSTONE
C139340		USGS		Geochemistry of rock samples from the National Geochemical Database: U.S. Geological Survey, Reston, VA.	U.S. Geological Survey	USGS		42.1458	-110.692	0.01	71	71	71	AAS	SEDIMENTARY	UNKNOWN	UNKNOWN	MUDSTONE
C139341		USGS		Geochemistry of rock samples from the National Geochemical Database: U.S. Geological Survey, Reston, VA.	U.S. Geological Survey	USGS		42.1458	-110.692	0.01	71	71	71	AAS	SEDIMENTARY	UNKNOWN	UNKNOWN	MUDSTONE
C139343		USGS		Geochemistry of rock samples from the National Geochemical Database: U.S. Geological Survey, Reston, VA.	U.S. Geological Survey	USGS		42.1458	-110.692	0.01	71	71	71	AAS	SEDIMENTARY	UNKNOWN	UNKNOWN	MUDSTONE
C139344		USGS		Geochemistry of rock samples from the National Geochemical Database: U.S. Geological Survey, Reston, VA.	U.S. Geological Survey	USGS		42.1458	-110.692	0.01	71	71	71	AAS	SEDIMENTARY	UNKNOWN	UNKNOWN	MUDSTONE
C139345		USGS		Geochemistry of rock samples from the National Geochemical Database: U.S. Geological Survey, Reston, VA.	U.S. Geological Survey	USGS		42.1458	-110.692	0.01	71	71	71	AAS	SEDIMENTARY	UNKNOWN	UNKNOWN	MUDSTONE
C139347		USGS		Geochemistry of rock samples from the National Geochemical Database: U.S. Geological Survey, Reston, VA.	U.S. Geological Survey	USGS		42.1458	-110.692	0.01	71	71	71	AAS	SEDIMENTARY	UNKNOWN	UNKNOWN	MUDSTONE
C139348		USGS		Geochemistry of rock samples from the National Geochemical Database: U.S. Geological Survey, Reston, VA.	U.S. Geological Survey	USGS		42.1458	-110.692	0.01	71	71	71	AAS	SEDIMENTARY	UNKNOWN	UNKNOWN	MUDSTONE
C139350		USGS		Geochemistry of rock samples from the National Geochemical Database: U.S. Geological Survey, Reston, VA.	U.S. Geological Survey	USGS		42.1458	-110.692	0.01	71	71	71	AAS	SEDIMENTARY	UNKNOWN	UNKNOWN	MUDSTONE
C139353		USGS		Geochemistry of rock samples from the National Geochemical Database: U.S. Geological Survey, Reston, VA.	U.S. Geological Survey	USGS		42.1458	-110.692	0.01	71	71	71	AAS	SEDIMENTARY	UNKNOWN	UNKNOWN	MUDSTONE
C139359		USGS		Geochemistry of rock samples from the National Geochemical Database: U.S. Geological Survey, Reston, VA.	U.S. Geological Survey	USGS		42.1458	-110.692	0.01	71	71	71	AAS	SEDIMENTARY	UNKNOWN	UNKNOWN	MUDSTONE
C139360		USGS		Geochemistry of rock samples from the National Geochemical Database: U.S. Geological Survey, Reston, VA.	U.S. Geological Survey	USGS		42.1458	-110.692	0.01	71	71	71	AAS	SEDIMENTARY	UNKNOWN	UNKNOWN	MUDSTONE
C139361		USGS		Geochemistry of rock samples from the National Geochemical Database: U.S. Geological Survey, Reston, VA.	U.S. Geological Survey	USGS		42.1458	-110.692	0.01	71	71	71	AAS	SEDIMENTARY	UNKNOWN	UNKNOWN	MUDSTONE
C139364		USGS		Geochemistry of rock samples from the National Geochemical Database: U.S. Geological Survey, Reston, VA.	U.S. Geological Survey	USGS		42.1458	-110.692	0.01	71	71	71	AAS	SEDIMENTARY	UNKNOWN	UNKNOWN	MUDSTONE
C139365		USGS		Geochemistry of rock samples from the National Geochemical Database: U.S. Geological Survey, Reston, VA.	U.S. Geological Survey	USGS		42.1458	-110.692	0.01	71	71	71	AAS	SEDIMENTARY	UNKNOWN	UNKNOWN	MUDSTONE
C139367		USGS		Geochemistry of rock samples from the National Geochemical Database: U.S. Geological Survey, Reston, VA.	U.S. Geological Survey	USGS		42.1458	-110.692	0.01	71	71	71	AAS	SEDIMENTARY	UNKNOWN	UNKNOWN	MUDSTONE
C139370		USGS		Geochemistry of rock samples from the National Geochemical Database: U.S. Geological Survey, Reston, VA.	U.S. Geological Survey	USGS		42.1458	-110.692	0.01	71	71	71	AAS	SEDIMENTARY	UNKNOWN	UNKNOWN	MUDSTONE
C139373		USGS		Geochemistry of rock samples from the National Geochemical Database: U.S. Geological Survey, Reston, VA.	U.S. Geological Survey	USGS		42.1458	-110.692	0.01	71	71	71	AAS	SEDIMENTARY	UNKNOWN	UNKNOWN	MUDSTONE
C147414		USGS		Geochemistry of rock samples from the National Geochemical Database: U.S. Geological Survey, Reston, VA.	U.S. Geological Survey	USGS		61.0603	-158.673	0.01				AAS	SEDIMENTARY	UNKNOWN	UNKNOWN	MUDSTONE
C147414		USGS		Geochemistry of rock samples from the National Geochemical Database: U.S. Geological Survey, Reston, VA.	U.S. Geological Survey	USGS		61.0603	-158.673	0.01				FAP	SEDIMENTARY	UNKNOWN	UNKNOWN	MUDSTONE
C147414		USGS		Geochemistry of rock samples from the National Geochemical Database: U.S. Geological Survey, Reston, VA.	U.S. Geological Survey	USGS		61.0603	-158.673	0.01				ICPAES	SEDIMENTARY	UNKNOWN	UNKNOWN	MUDSTONE																							4.63	1790	7	22	72.9		64.8	71
C147414		USGS		Geochemistry of rock samples from the National Geochemical Database: U.S. Geological Survey, Reston, VA.	U.S. Geological Survey	USGS		61.0603	-158.673	0.01				NAA	SEDIMENTARY	UNKNOWN	UNKNOWN	MUDSTONE
C147679		USGS		Geochemistry of rock samples from the National Geochemical Database: U.S. Geological Survey, Reston, VA.	U.S. Geological Survey	USGS		61.0603	-158.673	0.01				FAP	SEDIMENTARY	UNKNOWN	UNKNOWN	MUDSTONE
C147679		USGS		Geochemistry of rock samples from the National Geochemical Database: U.S. Geological Survey, Reston, VA.	U.S. Geological Survey	USGS		61.0603	-158.673	0.01				ICPAES	SEDIMENTARY	UNKNOWN	UNKNOWN	MUDSTONE																							2.86	1110		12	28.9	0.14	79.5	1
C147679		USGS		Geochemistry of rock samples from the National Geochemical Database: U.S. Geological Survey, Reston, VA.	U.S. Geological Survey	USGS		61.0603	-158.673	0.01				NAA	SEDIMENTARY	UNKNOWN	UNKNOWN	MUDSTONE
C147697		USGS		Geochemistry of rock samples from the National Geochemical Database: U.S. Geological Survey, Reston, VA.	U.S. Geological Survey	USGS		61.1317	-158.607	0.01				AAS	SEDIMENTARY	UNKNOWN	UNKNOWN	MUDSTONE
C147697		USGS		Geochemistry of rock samples from the National Geochemical Database: U.S. Geological Survey, Reston, VA.	U.S. Geological Survey	USGS		61.1317	-158.607	0.01				ICPAES	SEDIMENTARY	UNKNOWN	UNKNOWN	MUDSTONE																							4.79	628	4	14	73	0.1	90.4	8
C147697		USGS		Geochemistry of rock samples from the National Geochemical Database: U.S. Geological Survey, Reston, VA.	U.S. Geological Survey	USGS		61.1317	-158.607	0.01				NAA	SEDIMENTARY	UNKNOWN	UNKNOWN	MUDSTONE
C170451		USGS		Geochemistry of rock samples from the National Geochemical Database: U.S. Geological Survey, Reston, VA.	U.S. Geological Survey	USGS		62.7247	-148.117	0.01	59	63.5	68	ICPAES	SEDIMENTARY	UNKNOWN	UNKNOWN	MUDSTONE																							1	32	7		17		39	18
C170451		USGS		Geochemistry of rock samples from the National Geochemical Database: U.S. Geological Survey, Reston, VA.	U.S. Geological Survey	USGS		62.7247	-148.117	0.01	59	63.5	68	MISC	SEDIMENTARY	UNKNOWN	UNKNOWN	MUDSTONE																	2.76
C170451		USGS		Geochemistry of rock samples from the National Geochemical Database: U.S. Geological Survey, Reston, VA.	U.S. Geological Survey	USGS		62.7247	-148.117	0.01	59	63.5	68	TITR	SEDIMENTARY	UNKNOWN	UNKNOWN	MUDSTONE								0.23
C170451		USGS		Geochemistry of rock samples from the National Geochemical Database: U.S. Geological Survey, Reston, VA.	U.S. Geological Survey	USGS		62.7247	-148.117	0.01	59	63.5	68	XRF	SEDIMENTARY	UNKNOWN	UNKNOWN	MUDSTONE		87.2	0.25	4.37							0.61	0.07		1.17	0.18
C206763		USGS		Geochemistry of rock samples from the National Geochemical Database: U.S. Geological Survey, Reston, VA.	U.S. Geological Survey	USGS		32.89	-110.716	0.01	3	3	3	ISE	SEDIMENTARY	UNKNOWN	UNKNOWN	MUDSTONE
C206763		USGS		Geochemistry of rock samples from the National Geochemical Database: U.S. Geological Survey, Reston, VA.	U.S. Geological Survey	USGS		32.89	-110.716	0.01	3	3	3	ICPAES	SEDIMENTARY	UNKNOWN	UNKNOWN	MUDSTONE																							4	957	35	19	98		143
C206763		USGS		Geochemistry of rock samples from the National Geochemical Database: U.S. Geological Survey, Reston, VA.	U.S. Geological Survey	USGS		32.89	-110.716	0.01	3	3	3	MS	SEDIMENTARY	UNKNOWN	UNKNOWN	MUDSTONE																						21	3.2	800	29	18	73	0.11	140	10	0.05
C206763		USGS		Geochemistry of rock samples from the National Geochemical Database: U.S. Geological Survey, Reston, VA.	U.S. Geological Survey	USGS		32.89	-110.716	0.01	3	3	3	TITR	SEDIMENTARY	UNKNOWN	UNKNOWN	MUDSTONE								0.45
C208968		USGS		Geochemistry of rock samples from the National Geochemical Database: U.S. Geological Survey, Reston, VA.	U.S. Geological Survey	USGS		44.148	-114.588	0.01	43	43	43	AAS	SEDIMENTARY	UNKNOWN	UNKNOWN	MUDSTONE																														436
C208968		USGS		Geochemistry of rock samples from the National Geochemical Database: U.S. Geological Survey, Reston, VA.	U.S. Geological Survey	USGS		44.148	-114.588	0.01	43	43	43	FAP	SEDIMENTARY	UNKNOWN	UNKNOWN	MUDSTONE
C208968		USGS		Geochemistry of rock samples from the National Geochemical Database: U.S. Geological Survey, Reston, VA.	U.S. Geological Survey	USGS		44.148	-114.588	0.01	43	43	43	ICPAES	SEDIMENTARY	UNKNOWN	UNKNOWN	MUDSTONE																							1.78	33	16		222	6	546	314	248
C208968		USGS		Geochemistry of rock samples from the National Geochemical Database: U.S. Geological Survey, Reston, VA.	U.S. Geological Survey	USGS		44.148	-114.588	0.01	43	43	43	TITR	SEDIMENTARY	UNKNOWN	UNKNOWN	MUDSTONE
C208969		USGS		Geochemistry of rock samples from the National Geochemical Database: U.S. Geological Survey, Reston, VA.	U.S. Geological Survey	USGS		44.148	-114.588	0.01	43	43	43	AAS	SEDIMENTARY	UNKNOWN	UNKNOWN	MUDSTONE																														71.8
C208969		USGS		Geochemistry of rock samples from the National Geochemical Database: U.S. Geological Survey, Reston, VA.	U.S. Geological Survey	USGS		44.148	-114.588	0.01	43	43	43	FAP	SEDIMENTARY	UNKNOWN	UNKNOWN	MUDSTONE
C208969		USGS		Geochemistry of rock samples from the National Geochemical Database: U.S. Geological Survey, Reston, VA.	U.S. Geological Survey	USGS		44.148	-114.588	0.01	43	43	43	ICPAES	SEDIMENTARY	UNKNOWN	UNKNOWN	MUDSTONE																							1.9	163	39	6	60	18	948	61	9
C208969		USGS		Geochemistry of rock samples from the National Geochemical Database: U.S. Geological Survey, Reston, VA.	U.S. Geological Survey	USGS		44.148	-114.588	0.01	43	43	43	TITR	SEDIMENTARY	UNKNOWN	UNKNOWN	MUDSTONE
C208970		USGS		Geochemistry of rock samples from the National Geochemical Database: U.S. Geological Survey, Reston, VA.	U.S. Geological Survey	USGS		44.1852	-114.57	0.01	43	43	43	AAS	SEDIMENTARY	UNKNOWN	UNKNOWN	MUDSTONE																														464
C208970		USGS		Geochemistry of rock samples from the National Geochemical Database: U.S. Geological Survey, Reston, VA.	U.S. Geological Survey	USGS		44.1852	-114.57	0.01	43	43	43	FAP	SEDIMENTARY	UNKNOWN	UNKNOWN	MUDSTONE
C208970		USGS		Geochemistry of rock samples from the National Geochemical Database: U.S. Geological Survey, Reston, VA.	U.S. Geological Survey	USGS		44.1852	-114.57	0.01	43	43	43	ICPAES	SEDIMENTARY	UNKNOWN	UNKNOWN	MUDSTONE																							3.67	257	76	14	183	28	2700	333	39
C208970		USGS		Geochemistry of rock samples from the National Geochemical Database: U.S. Geological Survey, Reston, VA.	U.S. Geological Survey	USGS		44.1852	-114.57	0.01	43	43	43	TITR	SEDIMENTARY	UNKNOWN	UNKNOWN	MUDSTONE
C208971		USGS		Geochemistry of rock samples from the National Geochemical Database: U.S. Geological Survey, Reston, VA.	U.S. Geological Survey	USGS		44.1915	-114.579	0.01	43	43	43	AAS	SEDIMENTARY	UNKNOWN	UNKNOWN	MUDSTONE																														235
C208971		USGS		Geochemistry of rock samples from the National Geochemical Database: U.S. Geological Survey, Reston, VA.	U.S. Geological Survey	USGS		44.1915	-114.579	0.01	43	43	43	FAP	SEDIMENTARY	UNKNOWN	UNKNOWN	MUDSTONE
C208971		USGS		Geochemistry of rock samples from the National Geochemical Database: U.S. Geological Survey, Reston, VA.	U.S. Geological Survey	USGS		44.1915	-114.579	0.01	43	43	43	ICPAES	SEDIMENTARY	UNKNOWN	UNKNOWN	MUDSTONE																							2.24	305	65	12	59	14	1090	180	4
C208971		USGS		Geochemistry of rock samples from the National Geochemical Database: U.S. Geological Survey, Reston, VA.	U.S. Geological Survey	USGS		44.1915	-114.579	0.01	43	43	43	TITR	SEDIMENTARY	UNKNOWN	UNKNOWN	MUDSTONE
C209871		USGS		Geochemistry of rock samples from the National Geochemical Database: U.S. Geological Survey, Reston, VA.	U.S. Geological Survey	USGS		44.1479	-114.588	0.01	68	68	68	AAS	SEDIMENTARY	UNKNOWN	UNKNOWN	MUDSTONE																														433
C209871		USGS		Geochemistry of rock samples from the National Geochemical Database: U.S. Geological Survey, Reston, VA.	U.S. Geological Survey	USGS		44.1479	-114.588	0.01	68	68	68	FAP	SEDIMENTARY	UNKNOWN	UNKNOWN	MUDSTONE
C209871		USGS		Geochemistry of rock samples from the National Geochemical Database: U.S. Geological Survey, Reston, VA.	U.S. Geological Survey	USGS		44.1479	-114.588	0.01	68	68	68	ICPAES	SEDIMENTARY	UNKNOWN	UNKNOWN	MUDSTONE																							2.74	22	30	3	127	15	714	392	147
C209871		USGS		Geochemistry of rock samples from the National Geochemical Database: U.S. Geological Survey, Reston, VA.	U.S. Geological Survey	USGS		44.1479	-114.588	0.01	68	68	68	TITR	SEDIMENTARY	UNKNOWN	UNKNOWN	MUDSTONE
C209872		USGS		Geochemistry of rock samples from the National Geochemical Database: U.S. Geological Survey, Reston, VA.	U.S. Geological Survey	USGS		44.1479	-114.588	0.01	68	68	68	AAS	SEDIMENTARY	UNKNOWN	UNKNOWN	MUDSTONE																														41.1
C209872		USGS		Geochemistry of rock samples from the National Geochemical Database: U.S. Geological Survey, Reston, VA.	U.S. Geological Survey	USGS		44.1479	-114.588	0.01	68	68	68	FAP	SEDIMENTARY	UNKNOWN	UNKNOWN	MUDSTONE
C209872		USGS		Geochemistry of rock samples from the National Geochemical Database: U.S. Geological Survey, Reston, VA.	U.S. Geological Survey	USGS		44.1479	-114.588	0.01	68	68	68	ICPAES	SEDIMENTARY	UNKNOWN	UNKNOWN	MUDSTONE																							1.51	62	41	4	37	3	189	38
C209872		USGS		Geochemistry of rock samples from the National Geochemical Database: U.S. Geological Survey, Reston, VA.	U.S. Geological Survey	USGS		44.1479	-114.588	0.01	68	68	68	TITR	SEDIMENTARY	UNKNOWN	UNKNOWN	MUDSTONE
C209873		USGS		Geochemistry of rock samples from the National Geochemical Database: U.S. Geological Survey, Reston, VA.	U.S. Geological Survey	USGS		44.1852	-114.57	0.01	68	68	68	AAS	SEDIMENTARY	UNKNOWN	UNKNOWN	MUDSTONE																														71.7
C209873		USGS		Geochemistry of rock samples from the National Geochemical Database: U.S. Geological Survey, Reston, VA.	U.S. Geological Survey	USGS		44.1852	-114.57	0.01	68	68	68	FAP	SEDIMENTARY	UNKNOWN	UNKNOWN	MUDSTONE
C209873		USGS		Geochemistry of rock samples from the National Geochemical Database: U.S. Geological Survey, Reston, VA.	U.S. Geological Survey	USGS		44.1852	-114.57	0.01	68	68	68	ICPAES	SEDIMENTARY	UNKNOWN	UNKNOWN	MUDSTONE																							1.94	123	49	6	27	5	274	65
C209873		USGS		Geochemistry of rock samples from the National Geochemical Database: U.S. Geological Survey, Reston, VA.	U.S. Geological Survey	USGS		44.1852	-114.57	0.01	68	68	68	TITR	SEDIMENTARY	UNKNOWN	UNKNOWN	MUDSTONE
C209874		USGS		Geochemistry of rock samples from the National Geochemical Database: U.S. Geological Survey, Reston, VA.	U.S. Geological Survey	USGS		44.1852	-114.57	0.01	68	68	68	AAS	SEDIMENTARY	UNKNOWN	UNKNOWN	MUDSTONE																														138
C209874		USGS		Geochemistry of rock samples from the National Geochemical Database: U.S. Geological Survey, Reston, VA.	U.S. Geological Survey	USGS		44.1852	-114.57	0.01	68	68	68	FAP	SEDIMENTARY	UNKNOWN	UNKNOWN	MUDSTONE
C209874		USGS		Geochemistry of rock samples from the National Geochemical Database: U.S. Geological Survey, Reston, VA.	U.S. Geological Survey	USGS		44.1852	-114.57	0.01	68	68	68	ICPAES	SEDIMENTARY	UNKNOWN	UNKNOWN	MUDSTONE																							1.4	174	35	3	15	6	338	131	5
C209874		USGS		Geochemistry of rock samples from the National Geochemical Database: U.S. Geological Survey, Reston, VA.	U.S. Geological Survey	USGS		44.1852	-114.57	0.01	68	68	68	TITR	SEDIMENTARY	UNKNOWN	UNKNOWN	MUDSTONE
C209875		USGS		Geochemistry of rock samples from the National Geochemical Database: U.S. Geological Survey, Reston, VA.	U.S. Geological Survey	USGS		44.1861	-114.569	0.01	68	68	68	AAS	SEDIMENTARY	UNKNOWN	UNKNOWN	MUDSTONE																														18.7
C209875		USGS		Geochemistry of rock samples from the National Geochemical Database: U.S. Geological Survey, Reston, VA.	U.S. Geological Survey	USGS		44.1861	-114.569	0.01	68	68	68	FAP	SEDIMENTARY	UNKNOWN	UNKNOWN	MUDSTONE
C209875		USGS		Geochemistry of rock samples from the National Geochemical Database: U.S. Geological Survey, Reston, VA.	U.S. Geological Survey	USGS		44.1861	-114.569	0.01	68	68	68	ICPAES	SEDIMENTARY	UNKNOWN	UNKNOWN	MUDSTONE																							1.09	214	39	5	19	3	253	18
C209875		USGS		Geochemistry of rock samples from the National Geochemical Database: U.S. Geological Survey, Reston, VA.	U.S. Geological Survey	USGS		44.1861	-114.569	0.01	68	68	68	TITR	SEDIMENTARY	UNKNOWN	UNKNOWN	MUDSTONE
C209876		USGS		Geochemistry of rock samples from the National Geochemical Database: U.S. Geological Survey, Reston, VA.	U.S. Geological Survey	USGS		44.1851	-114.571	0.01				AAS	SEDIMENTARY	UNKNOWN	UNKNOWN	MUDSTONE																														139
C209876		USGS		Geochemistry of rock samples from the National Geochemical Database: U.S. Geological Survey, Reston, VA.	U.S. Geological Survey	USGS		44.1851	-114.571	0.01				ICPAES	SEDIMENTARY	UNKNOWN	UNKNOWN	MUDSTONE																							11.09	314	335	29	66		2220	130
C209876		USGS		Geochemistry of rock samples from the National Geochemical Database: U.S. Geological Survey, Reston, VA.	U.S. Geological Survey	USGS		44.1851	-114.571	0.01				TITR	SEDIMENTARY	UNKNOWN	UNKNOWN	MUDSTONE
C209877		USGS		Geochemistry of rock samples from the National Geochemical Database: U.S. Geological Survey, Reston, VA.	U.S. Geological Survey	USGS		44.1852	-114.571	0.01				AAS	SEDIMENTARY	UNKNOWN	UNKNOWN	MUDSTONE																														51.5
C209877		USGS		Geochemistry of rock samples from the National Geochemical Database: U.S. Geological Survey, Reston, VA.	U.S. Geological Survey	USGS		44.1852	-114.571	0.01				FAP	SEDIMENTARY	UNKNOWN	UNKNOWN	MUDSTONE
C209877		USGS		Geochemistry of rock samples from the National Geochemical Database: U.S. Geological Survey, Reston, VA.	U.S. Geological Survey	USGS		44.1852	-114.571	0.01				ICPAES	SEDIMENTARY	UNKNOWN	UNKNOWN	MUDSTONE																							7.84	563	218	37	55	3	1300	47
C209877		USGS		Geochemistry of rock samples from the National Geochemical Database: U.S. Geological Survey, Reston, VA.	U.S. Geological Survey	USGS		44.1852	-114.571	0.01				TITR	SEDIMENTARY	UNKNOWN	UNKNOWN	MUDSTONE
C210658		USGS		Geochemistry of rock samples from the National Geochemical Database: U.S. Geological Survey, Reston, VA.	U.S. Geological Survey	USGS		63.0997	-149.197	0.01				FAP	SEDIMENTARY	UNKNOWN	UNKNOWN	MUDSTONE
C210658		USGS		Geochemistry of rock samples from the National Geochemical Database: U.S. Geological Survey, Reston, VA.	U.S. Geological Survey	USGS		63.0997	-149.197	0.01				ICPAES	SEDIMENTARY	UNKNOWN	UNKNOWN	MUDSTONE																							4.51	204	93	23	119		177
C210658		USGS		Geochemistry of rock samples from the National Geochemical Database: U.S. Geological Survey, Reston, VA.	U.S. Geological Survey	USGS		63.0997	-149.197	0.01				MISC	SEDIMENTARY	UNKNOWN	UNKNOWN	MUDSTONE																	4.95
C210658		USGS		Geochemistry of rock samples from the National Geochemical Database: U.S. Geological Survey, Reston, VA.	U.S. Geological Survey	USGS		63.0997	-149.197	0.01				TITR	SEDIMENTARY	UNKNOWN	UNKNOWN	MUDSTONE								4.26
C210658		USGS		Geochemistry of rock samples from the National Geochemical Database: U.S. Geological Survey, Reston, VA.	U.S. Geological Survey	USGS		63.0997	-149.197	0.01				XRF	SEDIMENTARY	UNKNOWN	UNKNOWN	MUDSTONE		67.2	0.96	12.1						0.03	3.41	0.7	0.27	3.31	0.05										99		130		203	5
C210750		USGS		Geochemistry of rock samples from the National Geochemical Database: U.S. Geological Survey, Reston, VA.	U.S. Geological Survey	USGS		62.9555	-149.251	0.01				AAS	SEDIMENTARY	UNKNOWN	UNKNOWN	MUDSTONE
C210750		USGS		Geochemistry of rock samples from the National Geochemical Database: U.S. Geological Survey, Reston, VA.	U.S. Geological Survey	USGS		62.9555	-149.251	0.01				FAP	SEDIMENTARY	UNKNOWN	UNKNOWN	MUDSTONE
C210750		USGS		Geochemistry of rock samples from the National Geochemical Database: U.S. Geological Survey, Reston, VA.	U.S. Geological Survey	USGS		62.9555	-149.251	0.01				ICPAES	SEDIMENTARY	UNKNOWN	UNKNOWN	MUDSTONE																							1.77	165	38	6	89	5	351
C210750		USGS		Geochemistry of rock samples from the National Geochemical Database: U.S. Geological Survey, Reston, VA.	U.S. Geological Survey	USGS		62.9555	-149.251	0.01				MISC	SEDIMENTARY	UNKNOWN	UNKNOWN	MUDSTONE																	6.99
C210750		USGS		Geochemistry of rock samples from the National Geochemical Database: U.S. Geological Survey, Reston, VA.	U.S. Geological Survey	USGS		62.9555	-149.251	0.01				TITR	SEDIMENTARY	UNKNOWN	UNKNOWN	MUDSTONE								0.77
C210750		USGS		Geochemistry of rock samples from the National Geochemical Database: U.S. Geological Survey, Reston, VA.	U.S. Geological Survey	USGS		62.9555	-149.251	0.01				XRF	SEDIMENTARY	UNKNOWN	UNKNOWN	MUDSTONE		76.2	0.63	7.02						0.03	1.34	0.23	0.55	2.96	0.07										51		111	6	412	2	1
C220157		USGS		Geochemistry of rock samples from the National Geochemical Database: U.S. Geological Survey, Reston, VA.	U.S. Geological Survey	USGS		50.6431	-111.008	0.01	65	65	65	DNAA	SEDIMENTARY	UNKNOWN	UNKNOWN	MUDSTONE
C220384		USGS		Geochemistry of rock samples from the National Geochemical Database: U.S. Geological Survey, Reston, VA.	U.S. Geological Survey	USGS		43.6101	-123.104	0.01	3	3	3	AAS	SEDIMENTARY	UNKNOWN	UNKNOWN	MUDSTONE
C220384		USGS		Geochemistry of rock samples from the National Geochemical Database: U.S. Geological Survey, Reston, VA.	U.S. Geological Survey	USGS		43.6101	-123.104	0.01	3	3	3	MS	SEDIMENTARY	UNKNOWN	UNKNOWN	MUDSTONE																							0.02			0.2	394		3
C220385		USGS		Geochemistry of rock samples from the National Geochemical Database: U.S. Geological Survey, Reston, VA.	U.S. Geological Survey	USGS		43.6101	-123.104	0.01	3	3	3	AAS	SEDIMENTARY	UNKNOWN	UNKNOWN	MUDSTONE
C220385		USGS		Geochemistry of rock samples from the National Geochemical Database: U.S. Geological Survey, Reston, VA.	U.S. Geological Survey	USGS		43.6101	-123.104	0.01	3	3	3	MS	SEDIMENTARY	UNKNOWN	UNKNOWN	MUDSTONE																							0.13	9	2	2.1	41.3		12
C220455		USGS		Geochemistry of rock samples from the National Geochemical Database: U.S. Geological Survey, Reston, VA.	U.S. Geological Survey	USGS		40.4357	-121.398	0.01	6	6	6	AAS	SEDIMENTARY	UNKNOWN	UNKNOWN	MUDSTONE
C220455		USGS		Geochemistry of rock samples from the National Geochemical Database: U.S. Geological Survey, Reston, VA.	U.S. Geological Survey	USGS		40.4357	-121.398	0.01	6	6	6	MS	SEDIMENTARY	UNKNOWN	UNKNOWN	MUDSTONE																							1.43	91	19.4	7.1	25.4		21	2
C221130		USGS		Geochemistry of rock samples from the National Geochemical Database: U.S. Geological Survey, Reston, VA.	U.S. Geological Survey	USGS		28	85	0.01				ICPAES	SEDIMENTARY	UNKNOWN	UNKNOWN	MUDSTONE																							4.6	214	36	18	43		122	26
C221130		USGS		Geochemistry of rock samples from the National Geochemical Database: U.S. Geological Survey, Reston, VA.	U.S. Geological Survey	USGS		28	85	0.01				XRF	SEDIMENTARY	UNKNOWN	UNKNOWN	MUDSTONE																									36		46		124	21
C221131		USGS		Geochemistry of rock samples from the National Geochemical Database: U.S. Geological Survey, Reston, VA.	U.S. Geological Survey	USGS		28	85	0.01				ICPAES	SEDIMENTARY	UNKNOWN	UNKNOWN	MUDSTONE																							2.4	504	11	7	11		35
C221131		USGS		Geochemistry of rock samples from the National Geochemical Database: U.S. Geological Survey, Reston, VA.	U.S. Geological Survey	USGS		28	85	0.01				XRF	SEDIMENTARY	UNKNOWN	UNKNOWN	MUDSTONE																									13		13		38	3
C221132		USGS		Geochemistry of rock samples from the National Geochemical Database: U.S. Geological Survey, Reston, VA.	U.S. Geological Survey	USGS		28	85	0.01				ICPAES	SEDIMENTARY	UNKNOWN	UNKNOWN	MUDSTONE																							3.6	1270	32	18	46		84
C221132		USGS		Geochemistry of rock samples from the National Geochemical Database: U.S. Geological Survey, Reston, VA.	U.S. Geological Survey	USGS		28	85	0.01				XRF	SEDIMENTARY	UNKNOWN	UNKNOWN	MUDSTONE																									33		48		90	6
C221136		USGS		Geochemistry of rock samples from the National Geochemical Database: U.S. Geological Survey, Reston, VA.	U.S. Geological Survey	USGS		28	85	0.01	22	22	22	ICPAES	SEDIMENTARY	UNKNOWN	UNKNOWN	MUDSTONE																							1.3	23	13		18
C221136		USGS		Geochemistry of rock samples from the National Geochemical Database: U.S. Geological Survey, Reston, VA.	U.S. Geological Survey	USGS		28	85	0.01	22	22	22	XRF	SEDIMENTARY	UNKNOWN	UNKNOWN	MUDSTONE																									18		29		10	2
C221137		USGS		Geochemistry of rock samples from the National Geochemical Database: U.S. Geological Survey, Reston, VA.	U.S. Geological Survey	USGS		28	85	0.01	18	18	18	ICPAES	SEDIMENTARY	UNKNOWN	UNKNOWN	MUDSTONE																							1.8	22	18		30
C221137		USGS		Geochemistry of rock samples from the National Geochemical Database: U.S. Geological Survey, Reston, VA.	U.S. Geological Survey	USGS		28	85	0.01	18	18	18	XRF	SEDIMENTARY	UNKNOWN	UNKNOWN	MUDSTONE																									20		33		12	4
C221138		USGS		Geochemistry of rock samples from the National Geochemical Database: U.S. Geological Survey, Reston, VA.	U.S. Geological Survey	USGS		28	85	0.01	15	15	15	ICPAES	SEDIMENTARY	UNKNOWN	UNKNOWN	MUDSTONE																							6.8	31	22	5.1	43		14	20
C221138		USGS		Geochemistry of rock samples from the National Geochemical Database: U.S. Geological Survey, Reston, VA.	U.S. Geological Survey	USGS		28	85	0.01	15	15	15	XRF	SEDIMENTARY	UNKNOWN	UNKNOWN	MUDSTONE																									22		42		18	22
C224052		USGS		Geochemistry of rock samples from the National Geochemical Database: U.S. Geological Survey, Reston, VA.	U.S. Geological Survey	USGS		63.2073	-146.153	0.01				ICPAES	SEDIMENTARY	UNKNOWN	UNKNOWN	MUDSTONE																							2.1	134	49	5	35		132
C224052		USGS		Geochemistry of rock samples from the National Geochemical Database: U.S. Geological Survey, Reston, VA.	U.S. Geological Survey	USGS		63.2073	-146.153	0.01				MISC	SEDIMENTARY	UNKNOWN	UNKNOWN	MUDSTONE																	4.95
C224052		USGS		Geochemistry of rock samples from the National Geochemical Database: U.S. Geological Survey, Reston, VA.	U.S. Geological Survey	USGS		63.2073	-146.153	0.01				TITR	SEDIMENTARY	UNKNOWN	UNKNOWN	MUDSTONE								0.35
C224052		USGS		Geochemistry of rock samples from the National Geochemical Database: U.S. Geological Survey, Reston, VA.	U.S. Geological Survey	USGS		63.2073	-146.153	0.01				XRF	SEDIMENTARY	UNKNOWN	UNKNOWN	MUDSTONE		75.65	0.48	9.07		2.96				0.02	2.52	2.08	1.16	0.67	0.5
C226682		USGS		Geochemistry of rock samples from the National Geochemical Database: U.S. Geological Survey, Reston, VA.	U.S. Geological Survey	USGS		40.3414	-121.55	0.01	8	8	8	AAS	SEDIMENTARY	UNKNOWN	UNKNOWN	MUDSTONE
C226682		USGS		Geochemistry of rock samples from the National Geochemical Database: U.S. Geological Survey, Reston, VA.	U.S. Geological Survey	USGS		40.3414	-121.55	0.01	8	8	8	MS	SEDIMENTARY	UNKNOWN	UNKNOWN	MUDSTONE																							0.77	7	18.2	2.8	17.5	0.2	10	9
C227749		USGS		Geochemistry of rock samples from the National Geochemical Database: U.S. Geological Survey, Reston, VA.	U.S. Geological Survey	USGS		34.7501	-93.9948	0.01				ICPAES	SEDIMENTARY	UNKNOWN	UNKNOWN	MUDSTONE																							1.6	69	20	6.6	15		40
CAK009		USGS		Geochemistry of rock samples from the National Geochemical Database: U.S. Geological Survey, Reston, VA.	U.S. Geological Survey	USGS		61.9414	-141.396	0.01	59	59	59	ES	SEDIMENTARY	UNKNOWN	UNKNOWN	MUDSTONE																							2	500	100	15	50		200		3
CBJ412		USGS		Geochemistry of rock samples from the National Geochemical Database: U.S. Geological Survey, Reston, VA.	U.S. Geological Survey	USGS		55.3003	-131.227	0.01				AAS	SEDIMENTARY	UNKNOWN	UNKNOWN	MUDSTONE																													35
CBJ412		USGS		Geochemistry of rock samples from the National Geochemical Database: U.S. Geological Survey, Reston, VA.	U.S. Geological Survey	USGS		55.3003	-131.227	0.01				ES	SEDIMENTARY	UNKNOWN	UNKNOWN	MUDSTONE																									50	30	20
CBT014		USGS		Geochemistry of rock samples from the National Geochemical Database: U.S. Geological Survey, Reston, VA.	U.S. Geological Survey	USGS		68.0667	-162.317	0.01				AAS	SEDIMENTARY	UNKNOWN	UNKNOWN	MUDSTONE																													85
CBT014		USGS		Geochemistry of rock samples from the National Geochemical Database: U.S. Geological Survey, Reston, VA.	U.S. Geological Survey	USGS		68.0667	-162.317	0.01				ES	SEDIMENTARY	UNKNOWN	UNKNOWN	MUDSTONE																							0.2	30	70						10
CBZ761		USGS		Geochemistry of rock samples from the National Geochemical Database: U.S. Geological Survey, Reston, VA.	U.S. Geological Survey	USGS		68.4667	-161.754	0.01				AAS	SEDIMENTARY	UNKNOWN	UNKNOWN	MUDSTONE
CBZ761		USGS		Geochemistry of rock samples from the National Geochemical Database: U.S. Geological Survey, Reston, VA.	U.S. Geological Survey	USGS		68.4667	-161.754	0.01				ES	SEDIMENTARY	UNKNOWN	UNKNOWN	MUDSTONE																							2		20						1
CBZ768		USGS		Geochemistry of rock samples from the National Geochemical Database: U.S. Geological Survey, Reston, VA.	U.S. Geological Survey	USGS		67.8417	-156.812	0.01				AAS	SEDIMENTARY	UNKNOWN	UNKNOWN	MUDSTONE																											15		35
CBZ768		USGS		Geochemistry of rock samples from the National Geochemical Database: U.S. Geological Survey, Reston, VA.	U.S. Geological Survey	USGS		67.8417	-156.812	0.01				ES	SEDIMENTARY	UNKNOWN	UNKNOWN	MUDSTONE																							1.5	100	70		30				1
CCR160		USGS		Geochemistry of rock samples from the National Geochemical Database: U.S. Geological Survey, Reston, VA.	U.S. Geological Survey	USGS		68.7917	-148.325	0.01	71	71	71	AAS	SEDIMENTARY	UNKNOWN	UNKNOWN	MUDSTONE																													100
CCR160		USGS		Geochemistry of rock samples from the National Geochemical Database: U.S. Geological Survey, Reston, VA.	U.S. Geological Survey	USGS		68.7917	-148.325	0.01	71	71	71	ES	SEDIMENTARY	UNKNOWN	UNKNOWN	MUDSTONE																							10	300	150	20	70
CCR174		USGS		Geochemistry of rock samples from the National Geochemical Database: U.S. Geological Survey, Reston, VA.	U.S. Geological Survey	USGS		68.9472	-148.075	0.01	71	71	71	AAS	SEDIMENTARY	UNKNOWN	UNKNOWN	MUDSTONE																													110
CCR174		USGS		Geochemistry of rock samples from the National Geochemical Database: U.S. Geological Survey, Reston, VA.	U.S. Geological Survey	USGS		68.9472	-148.075	0.01	71	71	71	ES	SEDIMENTARY	UNKNOWN	UNKNOWN	MUDSTONE																							2	300	70	15	30
CCS023		USGS		Geochemistry of rock samples from the National Geochemical Database: U.S. Geological Survey, Reston, VA.	U.S. Geological Survey	USGS		63.5875	-156	0.01	59	59	59	AAS	SEDIMENTARY	UNKNOWN	UNKNOWN	MUDSTONE																											45		110
CCS023		USGS		Geochemistry of rock samples from the National Geochemical Database: U.S. Geological Survey, Reston, VA.	U.S. Geological Survey	USGS		63.5875	-156	0.01	59	59	59	COL	SEDIMENTARY	UNKNOWN	UNKNOWN	MUDSTONE																														10
CCS023		USGS		Geochemistry of rock samples from the National Geochemical Database: U.S. Geological Survey, Reston, VA.	U.S. Geological Survey	USGS		63.5875	-156	0.01	59	59	59	ES	SEDIMENTARY	UNKNOWN	UNKNOWN	MUDSTONE																							20	1000	30	50	150
CEI695		USGS		Geochemistry of rock samples from the National Geochemical Database: U.S. Geological Survey, Reston, VA.	U.S. Geological Survey	USGS		57.1889	-156.341	0.01				AAS	SEDIMENTARY	UNKNOWN	UNKNOWN	MUDSTONE																											30		80
CEI695		USGS		Geochemistry of rock samples from the National Geochemical Database: U.S. Geological Survey, Reston, VA.	U.S. Geological Survey	USGS		57.1889	-156.341	0.01				ES	SEDIMENTARY	UNKNOWN	UNKNOWN	MUDSTONE																							5	700	20	30	30
CFG909		USGS		Geochemistry of rock samples from the National Geochemical Database: U.S. Geological Survey, Reston, VA.	U.S. Geological Survey	USGS		59.8403	-144.527	0.01				AAS	SEDIMENTARY	UNKNOWN	UNKNOWN	MUDSTONE																												0.7	90	5	0.1
CFG909		USGS		Geochemistry of rock samples from the National Geochemical Database: U.S. Geological Survey, Reston, VA.	U.S. Geological Survey	USGS		59.8403	-144.527	0.01				ES	SEDIMENTARY	UNKNOWN	UNKNOWN	MUDSTONE																							7	1000	50	30	100		300
CFR293		USGS		Geochemistry of rock samples from the National Geochemical Database: U.S. Geological Survey, Reston, VA.	U.S. Geological Survey	USGS		59.9292	-144.417	0.01				AAS	SEDIMENTARY	UNKNOWN	UNKNOWN	MUDSTONE																													65
CFR293		USGS		Geochemistry of rock samples from the National Geochemical Database: U.S. Geological Survey, Reston, VA.	U.S. Geological Survey	USGS		59.9292	-144.417	0.01				ES	SEDIMENTARY	UNKNOWN	UNKNOWN	MUDSTONE																							3	300	20	15	30
CFR294		USGS		Geochemistry of rock samples from the National Geochemical Database: U.S. Geological Survey, Reston, VA.	U.S. Geological Survey	USGS		59.9292	-144.417	0.01				AAS	SEDIMENTARY	UNKNOWN	UNKNOWN	MUDSTONE																													85
CFR294		USGS		Geochemistry of rock samples from the National Geochemical Database: U.S. Geological Survey, Reston, VA.	U.S. Geological Survey	USGS		59.9292	-144.417	0.01				ES	SEDIMENTARY	UNKNOWN	UNKNOWN	MUDSTONE																							3	300	30	15	70
D117325		USGS		Geochemistry of rock samples from the National Geochemical Database: U.S. Geological Survey, Reston, VA.	U.S. Geological Survey	USGS		36.25	-85.6333	0.01	69	69	69	UNKNOWN	SEDIMENTARY	UNKNOWN	UNKNOWN	MUDSTONE																							3	3000	50		50
D117326		USGS		Geochemistry of rock samples from the National Geochemical Database: U.S. Geological Survey, Reston, VA.	U.S. Geological Survey	USGS		36.25	-85.6333	0.01	69	69	69	UNKNOWN	SEDIMENTARY	UNKNOWN	UNKNOWN	MUDSTONE																							1.5	700	20		70
D124379		USGS		Geochemistry of rock samples from the National Geochemical Database: U.S. Geological Survey, Reston, VA.	U.S. Geological Survey	USGS		59.201	-136.469	0.01	55	64	73	ES	SEDIMENTARY	UNKNOWN	UNKNOWN	MUDSTONE																							5	200	20	15	150
D126779		USGS		Geochemistry of rock samples from the National Geochemical Database: U.S. Geological Survey, Reston, VA.	U.S. Geological Survey	USGS		43.15	-124.283	0.01				UNKNOWN	SEDIMENTARY	UNKNOWN	UNKNOWN	MUDSTONE																							3	150	30	15	70
D127825		USGS		Geochemistry of rock samples from the National Geochemical Database: U.S. Geological Survey, Reston, VA.	U.S. Geological Survey	USGS		36.8667	-104.883	0.01	65	65	65	UNKNOWN	SEDIMENTARY	UNKNOWN	UNKNOWN	MUDSTONE																							5	200	7	7	70
D127826		USGS		Geochemistry of rock samples from the National Geochemical Database: U.S. Geological Survey, Reston, VA.	U.S. Geological Survey	USGS		36.8667	-104.883	0.01	65	65	65	UNKNOWN	SEDIMENTARY	UNKNOWN	UNKNOWN	MUDSTONE																							5	150	15	10	50
D127827		USGS		Geochemistry of rock samples from the National Geochemical Database: U.S. Geological Survey, Reston, VA.	U.S. Geological Survey	USGS		36.8667	-104.883	0.01	22	22	22	UNKNOWN	SEDIMENTARY	UNKNOWN	UNKNOWN	MUDSTONE																							7	1000	10	7	50
D128977		USGS		Geochemistry of rock samples from the National Geochemical Database: U.S. Geological Survey, Reston, VA.	U.S. Geological Survey	USGS		35.45	-108.167	0.01	56	56	56	UNKNOWN	SEDIMENTARY	UNKNOWN	UNKNOWN	MUDSTONE																							3	100	10	7	10
D129138		USGS		Geochemistry of rock samples from the National Geochemical Database: U.S. Geological Survey, Reston, VA.	U.S. Geological Survey	USGS		42.75	-117.633	0.01	8	8	8	UNKNOWN	SEDIMENTARY	UNKNOWN	UNKNOWN	MUDSTONE																							3	500	7	10	50
D129437		USGS		Geochemistry of rock samples from the National Geochemical Database: U.S. Geological Survey, Reston, VA.	U.S. Geological Survey	USGS		39.0833	-108.2	0.01	18	18	18	UNKNOWN	SEDIMENTARY	UNKNOWN	UNKNOWN	MUDSTONE																							5	70	10	3	30
D129440		USGS		Geochemistry of rock samples from the National Geochemical Database: U.S. Geological Survey, Reston, VA.	U.S. Geological Survey	USGS		36.35	-106.867	0.01	18	18	18	UNKNOWN	SEDIMENTARY	UNKNOWN	UNKNOWN	MUDSTONE																							5	100	15	5	30
D129441		USGS		Geochemistry of rock samples from the National Geochemical Database: U.S. Geological Survey, Reston, VA.	U.S. Geological Survey	USGS		37.0333	-107.133	0.01	22	22	22	UNKNOWN	SEDIMENTARY	UNKNOWN	UNKNOWN	MUDSTONE																							7	500	10	15	30
D129443		USGS		Geochemistry of rock samples from the National Geochemical Database: U.S. Geological Survey, Reston, VA.	U.S. Geological Survey	USGS		43.8167	-106.1	0.01	18	18	18	UNKNOWN	SEDIMENTARY	UNKNOWN	UNKNOWN	MUDSTONE																							3	500	20	5	150
D129448		USGS		Geochemistry of rock samples from the National Geochemical Database: U.S. Geological Survey, Reston, VA.	U.S. Geological Survey	USGS		43.4667	-109.483	0.01	18	18	18	UNKNOWN	SEDIMENTARY	UNKNOWN	UNKNOWN	MUDSTONE																							5	500	20	10	70
D129449		USGS		Geochemistry of rock samples from the National Geochemical Database: U.S. Geological Survey, Reston, VA.	U.S. Geological Survey	USGS		43.5833	-109.367	0.01	18	18	18	UNKNOWN	SEDIMENTARY	UNKNOWN	UNKNOWN	MUDSTONE																							10	1500	30	20	70
D129450		USGS		Geochemistry of rock samples from the National Geochemical Database: U.S. Geological Survey, Reston, VA.	U.S. Geological Survey	USGS		42.6167	-108.267	0.01	18	18	18	UNKNOWN	SEDIMENTARY	UNKNOWN	UNKNOWN	MUDSTONE																							7	100	30	5	50
D129451		USGS		Geochemistry of rock samples from the National Geochemical Database: U.S. Geological Survey, Reston, VA.	U.S. Geological Survey	USGS		42.4833	-108.167	0.01	18	18	18	UNKNOWN	SEDIMENTARY	UNKNOWN	UNKNOWN	MUDSTONE																							7	700	30	15	50
D129452		USGS		Geochemistry of rock samples from the National Geochemical Database: U.S. Geological Survey, Reston, VA.	U.S. Geological Survey	USGS		43.6333	-107.583	0.01	18	18	18	UNKNOWN	SEDIMENTARY	UNKNOWN	UNKNOWN	MUDSTONE																							10	200	50	15	70
D129453		USGS		Geochemistry of rock samples from the National Geochemical Database: U.S. Geological Survey, Reston, VA.	U.S. Geological Survey	USGS		43.3667	-107.567	0.01	18	18	18	UNKNOWN	SEDIMENTARY	UNKNOWN	UNKNOWN	MUDSTONE																							5	700	30	20	50
D129458		USGS		Geochemistry of rock samples from the National Geochemical Database: U.S. Geological Survey, Reston, VA.	U.S. Geological Survey	USGS		41.5333	-109.45	0.01	18	18	18	UNKNOWN	SEDIMENTARY	UNKNOWN	UNKNOWN	MUDSTONE																							3	500	20	5	30
D129459		USGS		Geochemistry of rock samples from the National Geochemical Database: U.S. Geological Survey, Reston, VA.	U.S. Geological Survey	USGS		41.0833	-110.167	0.01	18	18	18	UNKNOWN	SEDIMENTARY	UNKNOWN	UNKNOWN	MUDSTONE																							3	150	30	7	20
D129784		USGS		Geochemistry of rock samples from the National Geochemical Database: U.S. Geological Survey, Reston, VA.	U.S. Geological Survey	USGS		42.4833	-108.167	0.01	18	18	18	UNKNOWN	SEDIMENTARY	UNKNOWN	UNKNOWN	MUDSTONE																							1.5	2000	15	5	20
D130037		USGS		Geochemistry of rock samples from the National Geochemical Database: U.S. Geological Survey, Reston, VA.	U.S. Geological Survey	USGS		40.8833	-109.75	0.01	68	68	68	UNKNOWN	SEDIMENTARY	UNKNOWN	UNKNOWN	MUDSTONE																							2	300	30	10	15
D130038		USGS		Geochemistry of rock samples from the National Geochemical Database: U.S. Geological Survey, Reston, VA.	U.S. Geological Survey	USGS		40.8833	-109.75	0.01	68	68	68	UNKNOWN	SEDIMENTARY	UNKNOWN	UNKNOWN	MUDSTONE																							0.7	1000	5		1.5
D131143		USGS		Geochemistry of rock samples from the National Geochemical Database: U.S. Geological Survey, Reston, VA.	U.S. Geological Survey	USGS		35.3833	-108	0.01	56	56	56	UNKNOWN	SEDIMENTARY	UNKNOWN	UNKNOWN	MUDSTONE																							1	200	10	7	70
D131144		USGS		Geochemistry of rock samples from the National Geochemical Database: U.S. Geological Survey, Reston, VA.	U.S. Geological Survey	USGS		35.3833	-108	0.01	56	56	56	UNKNOWN	SEDIMENTARY	UNKNOWN	UNKNOWN	MUDSTONE																							2	300	10	7	7
D132022		USGS		Geochemistry of rock samples from the National Geochemical Database: U.S. Geological Survey, Reston, VA.	U.S. Geological Survey	USGS		43.1333	-110.767	0.01	71	71	71	MISC	SEDIMENTARY	UNKNOWN	UNKNOWN	MUDSTONE																	16.5
D131562		USGS		Geochemistry of rock samples from the National Geochemical Database: U.S. Geological Survey, Reston, VA.	U.S. Geological Survey	USGS		43.375	-110.875	0.01	71	71	71	UNKNOWN	SEDIMENTARY	UNKNOWN	UNKNOWN	MUDSTONE																						1	0.3	10	50		50				1
D131563		USGS		Geochemistry of rock samples from the National Geochemical Database: U.S. Geological Survey, Reston, VA.	U.S. Geological Survey	USGS		43.375	-110.875	0.01	71	71	71	UNKNOWN	SEDIMENTARY	UNKNOWN	UNKNOWN	MUDSTONE																						2	0.7	15	70		70	50			1
D131564		USGS		Geochemistry of rock samples from the National Geochemical Database: U.S. Geological Survey, Reston, VA.	U.S. Geological Survey	USGS		43.375	-110.875	0.01	71	71	71	UNKNOWN	SEDIMENTARY	UNKNOWN	UNKNOWN	MUDSTONE																							1.5	70	150		50	50	1000		0.7
D132027		USGS		Geochemistry of rock samples from the National Geochemical Database: U.S. Geological Survey, Reston, VA.	U.S. Geological Survey	USGS		43.1333	-110.767	0.01	71	71	71	MISC	SEDIMENTARY	UNKNOWN	UNKNOWN	MUDSTONE																	12.6
D132012		USGS		Geochemistry of rock samples from the National Geochemical Database: U.S. Geological Survey, Reston, VA.	U.S. Geological Survey	USGS		43.1333	-110.767	0.01	71	71	71	UNKNOWN	SEDIMENTARY	UNKNOWN	UNKNOWN	MUDSTONE																							2	150	500	10	200	200	1500		7
D132016		USGS		Geochemistry of rock samples from the National Geochemical Database: U.S. Geological Survey, Reston, VA.	U.S. Geological Survey	USGS		43.1333	-110.767	0.01	71	71	71	MISC	SEDIMENTARY	UNKNOWN	UNKNOWN	MUDSTONE																	14.8
D132016		USGS		Geochemistry of rock samples from the National Geochemical Database: U.S. Geological Survey, Reston, VA.	U.S. Geological Survey	USGS		43.1333	-110.767	0.01	71	71	71	UNKNOWN	SEDIMENTARY	UNKNOWN	UNKNOWN	MUDSTONE		12.7	0.14	3.5		1.24					0.6	33.1	1.38	1.27	21.8							5	1		300	3	200	150	2000	0.002	7
D132019		USGS		Geochemistry of rock samples from the National Geochemical Database: U.S. Geological Survey, Reston, VA.	U.S. Geological Survey	USGS		43.1333	-110.767	0.01	71	71	71	UNKNOWN	SEDIMENTARY	UNKNOWN	UNKNOWN	MUDSTONE																						0.1	0.15	150	70		20				0.7
D132020		USGS		Geochemistry of rock samples from the National Geochemical Database: U.S. Geological Survey, Reston, VA.	U.S. Geological Survey	USGS		43.1333	-110.767	0.01	71	71	71	UNKNOWN	SEDIMENTARY	UNKNOWN	UNKNOWN	MUDSTONE																						7	1.5	150	300	3	200	100	1000		7
D132022		USGS		Geochemistry of rock samples from the National Geochemical Database: U.S. Geological Survey, Reston, VA.	U.S. Geological Survey	USGS		43.1333	-110.767	0.01	71	71	71	UNKNOWN	SEDIMENTARY	UNKNOWN	UNKNOWN	MUDSTONE		7.25	0.12	1.7		0.92					0.42	37.2	0.56	0.55	25.4							3	0.7		150		150	300	500	0.0015	5
D132023		USGS		Geochemistry of rock samples from the National Geochemical Database: U.S. Geological Survey, Reston, VA.	U.S. Geological Survey	USGS		43.1333	-110.767	0.01	71	71	71	UNKNOWN	SEDIMENTARY	UNKNOWN	UNKNOWN	MUDSTONE																						5	1	70	300		200	200	700		7
D132024		USGS		Geochemistry of rock samples from the National Geochemical Database: U.S. Geological Survey, Reston, VA.	U.S. Geological Survey	USGS		43.1333	-110.767	0.01	71	71	71	UNKNOWN	SEDIMENTARY	UNKNOWN	UNKNOWN	MUDSTONE																						3	0.7	70	200		150	100	500		5
D132025		USGS		Geochemistry of rock samples from the National Geochemical Database: U.S. Geological Survey, Reston, VA.	U.S. Geological Survey	USGS		43.1333	-110.767	0.01	71	71	71	UNKNOWN	SEDIMENTARY	UNKNOWN	UNKNOWN	MUDSTONE																						10	2	70	500		200	70	1000		7
D132027		USGS		Geochemistry of rock samples from the National Geochemical Database: U.S. Geological Survey, Reston, VA.	U.S. Geological Survey	USGS		43.1333	-110.767	0.01	71	71	71	UNKNOWN	SEDIMENTARY	UNKNOWN	UNKNOWN	MUDSTONE		14.9		3		2.1					0.44	35.3	1.05	0.77	22.9							5	1.5		150		100	70	700	0.0025	1.5
D132040		USGS		Geochemistry of rock samples from the National Geochemical Database: U.S. Geological Survey, Reston, VA.	U.S. Geological Survey	USGS		43.25	-111.25	0.01	71	71	71	MISC	SEDIMENTARY	UNKNOWN	UNKNOWN	MUDSTONE																	15.9
D132040		USGS		Geochemistry of rock samples from the National Geochemical Database: U.S. Geological Survey, Reston, VA.	U.S. Geological Survey	USGS		43.25	-111.25	0.01	71	71	71	UNKNOWN	SEDIMENTARY	UNKNOWN	UNKNOWN	MUDSTONE		16.9	0.16	4.3							1.9	29.3	0.8	1.57	19.7							5	1.5		200	5	300	100	1500	0.001	10
D132043		USGS		Geochemistry of rock samples from the National Geochemical Database: U.S. Geological Survey, Reston, VA.	U.S. Geological Survey	USGS		43.25	-111.25	0.01	71	71	71	UNKNOWN	SEDIMENTARY	UNKNOWN	UNKNOWN	MUDSTONE																						10	1.5	20	300		300	200	1000		10
D132045		USGS		Geochemistry of rock samples from the National Geochemical Database: U.S. Geological Survey, Reston, VA.	U.S. Geological Survey	USGS		43.25	-111.25	0.01	71	71	71	UNKNOWN	SEDIMENTARY	UNKNOWN	UNKNOWN	MUDSTONE																							2	70	300	3	300	200	2000		10
D132046		USGS		Geochemistry of rock samples from the National Geochemical Database: U.S. Geological Survey, Reston, VA.	U.S. Geological Survey	USGS		43.25	-111.25	0.01	71	71	71	UNKNOWN	SEDIMENTARY	UNKNOWN	UNKNOWN	MUDSTONE																						7	0.7	100	100		50	30	300		1
D132048		USGS		Geochemistry of rock samples from the National Geochemical Database: U.S. Geological Survey, Reston, VA.	U.S. Geological Survey	USGS		43.25	-111.25	0.01	71	71	71	UNKNOWN	SEDIMENTARY	UNKNOWN	UNKNOWN	MUDSTONE																							2	70	500		500	150	1500		10
D132051		USGS		Geochemistry of rock samples from the National Geochemical Database: U.S. Geological Survey, Reston, VA.	U.S. Geological Survey	USGS		43.25	-111.25	0.01	71	71	71	UNKNOWN	SEDIMENTARY	UNKNOWN	UNKNOWN	MUDSTONE																							2	50	200		300	70	700		10
D132055		USGS		Geochemistry of rock samples from the National Geochemical Database: U.S. Geological Survey, Reston, VA.	U.S. Geological Survey	USGS		41.25	-111.5	0.01	68	68	68	UNKNOWN	SEDIMENTARY	UNKNOWN	UNKNOWN	MUDSTONE																						10	2	50	300	3	200		700		5
D132056		USGS		Geochemistry of rock samples from the National Geochemical Database: U.S. Geological Survey, Reston, VA.	U.S. Geological Survey	USGS		41.25	-111.5	0.01	68	68	68	UNKNOWN	SEDIMENTARY	UNKNOWN	UNKNOWN	MUDSTONE																							1.5	30	300	3	300		300		20
D132066		USGS		Geochemistry of rock samples from the National Geochemical Database: U.S. Geological Survey, Reston, VA.	U.S. Geological Survey	USGS		41.25	-111.5	0.01	68	68	68	MISC	SEDIMENTARY	UNKNOWN	UNKNOWN	MUDSTONE																	14.8
D132066		USGS		Geochemistry of rock samples from the National Geochemical Database: U.S. Geological Survey, Reston, VA.	U.S. Geological Survey	USGS		41.25	-111.5	0.01	68	68	68	UNKNOWN	SEDIMENTARY	UNKNOWN	UNKNOWN	MUDSTONE		27.3	0.18	4.6							1.97	25.8	0.34	1.68	14.5							10	1		200	3	150	30	500		7
D132068		USGS		Geochemistry of rock samples from the National Geochemical Database: U.S. Geological Survey, Reston, VA.	U.S. Geological Survey	USGS		41.25	-111.5	0.01	68	68	68	MISC	SEDIMENTARY	UNKNOWN	UNKNOWN	MUDSTONE																	18.3
D132068		USGS		Geochemistry of rock samples from the National Geochemical Database: U.S. Geological Survey, Reston, VA.	U.S. Geological Survey	USGS		41.25	-111.5	0.01	68	68	68	UNKNOWN	SEDIMENTARY	UNKNOWN	UNKNOWN	MUDSTONE		44.5	0.23	7.4							4.71	13.5	0.15	2.17	3.4							10	1.5		300	3	200		300		7
D132070		USGS		Geochemistry of rock samples from the National Geochemical Database: U.S. Geological Survey, Reston, VA.	U.S. Geological Survey	USGS		40.8833	-109.75	0.01	71	71	71	UNKNOWN	SEDIMENTARY	UNKNOWN	UNKNOWN	MUDSTONE																						7	1	100	200	3	100				7
D132073		USGS		Geochemistry of rock samples from the National Geochemical Database: U.S. Geological Survey, Reston, VA.	U.S. Geological Survey	USGS		40.8833	-109.75	0.01	71	71	71	UNKNOWN	SEDIMENTARY	UNKNOWN	UNKNOWN	MUDSTONE																							1.5	70	300	7	150		300		1.5
D132075		USGS		Geochemistry of rock samples from the National Geochemical Database: U.S. Geological Survey, Reston, VA.	U.S. Geological Survey	USGS		40.8833	-109.75	0.01	71	71	71	UNKNOWN	SEDIMENTARY	UNKNOWN	UNKNOWN	MUDSTONE																						10	1	100	200	7	50
D132079		USGS		Geochemistry of rock samples from the National Geochemical Database: U.S. Geological Survey, Reston, VA.	U.S. Geological Survey	USGS		40.8833	-109.75	0.01	71	71	71	UNKNOWN	SEDIMENTARY	UNKNOWN	UNKNOWN	MUDSTONE																						5	1	100	70		30
D132089		USGS		Geochemistry of rock samples from the National Geochemical Database: U.S. Geological Survey, Reston, VA.	U.S. Geological Survey	USGS		40.8833	-109.75	0.01	71	71	71	UNKNOWN	SEDIMENTARY	UNKNOWN	UNKNOWN	MUDSTONE																						10	1.5	50	30		15
D132091		USGS		Geochemistry of rock samples from the National Geochemical Database: U.S. Geological Survey, Reston, VA.	U.S. Geological Survey	USGS		40.8833	-109.75	0.01	71	71	71	UNKNOWN	SEDIMENTARY	UNKNOWN	UNKNOWN	MUDSTONE																						10	1.5	70	20		15
D132093		USGS		Geochemistry of rock samples from the National Geochemical Database: U.S. Geological Survey, Reston, VA.	U.S. Geological Survey	USGS		40.8833	-109.75	0.01	71	71	71	UNKNOWN	SEDIMENTARY	UNKNOWN	UNKNOWN	MUDSTONE																						10	1	50	20		15
D132096		USGS		Geochemistry of rock samples from the National Geochemical Database: U.S. Geological Survey, Reston, VA.	U.S. Geological Survey	USGS		40.8833	-109.75	0.01	71	71	71	UNKNOWN	SEDIMENTARY	UNKNOWN	UNKNOWN	MUDSTONE																						10	1.5	70	30		10
D132105		USGS		Geochemistry of rock samples from the National Geochemical Database: U.S. Geological Survey, Reston, VA.	U.S. Geological Survey	USGS		40.8833	-109.75	0.01	71	71	71	MISC	SEDIMENTARY	UNKNOWN	UNKNOWN	MUDSTONE																	16.9
D132105		USGS		Geochemistry of rock samples from the National Geochemical Database: U.S. Geological Survey, Reston, VA.	U.S. Geological Survey	USGS		40.8833	-109.75	0.01	71	71	71	UNKNOWN	SEDIMENTARY	UNKNOWN	UNKNOWN	MUDSTONE		27.7	0.16	4.2							6.2	27.5	0.85	1.43	13.2							7	1.5		20		7		0.01
D132111		USGS		Geochemistry of rock samples from the National Geochemical Database: U.S. Geological Survey, Reston, VA.	U.S. Geological Survey	USGS		40.8833	-109.75	0.01	71	71	71	UNKNOWN	SEDIMENTARY	UNKNOWN	UNKNOWN	MUDSTONE																						10	1	150	30		10
D132113		USGS		Geochemistry of rock samples from the National Geochemical Database: U.S. Geological Survey, Reston, VA.	U.S. Geological Survey	USGS		40.8833	-109.75	0.01	71	71	71	UNKNOWN	SEDIMENTARY	UNKNOWN	UNKNOWN	MUDSTONE																						7	1	150	30		15
D132121		USGS		Geochemistry of rock samples from the National Geochemical Database: U.S. Geological Survey, Reston, VA.	U.S. Geological Survey	USGS		43.25	-111.25	0.01	71	71	71	MISC	SEDIMENTARY	UNKNOWN	UNKNOWN	MUDSTONE																	13.7
D132121		USGS		Geochemistry of rock samples from the National Geochemical Database: U.S. Geological Survey, Reston, VA.	U.S. Geological Survey	USGS		43.25	-111.25	0.01	71	71	71	UNKNOWN	SEDIMENTARY	UNKNOWN	UNKNOWN	MUDSTONE		28.5	0.26	5.2							1.98	24.3	1.2	1.48	15.3							7	1.5		150		100	70	700	0.002	5
D132591		USGS		Geochemistry of rock samples from the National Geochemical Database: U.S. Geological Survey, Reston, VA.	U.S. Geological Survey	USGS		42.75	-117.633	0.01	8	8	8	UNKNOWN	SEDIMENTARY	UNKNOWN	UNKNOWN	MUDSTONE
D132611		USGS		Geochemistry of rock samples from the National Geochemical Database: U.S. Geological Survey, Reston, VA.	U.S. Geological Survey	USGS		42.75	-117.633	0.01	2	2	2	UNKNOWN	SEDIMENTARY	UNKNOWN	UNKNOWN	MUDSTONE
D132684		USGS		Geochemistry of rock samples from the National Geochemical Database: U.S. Geological Survey, Reston, VA.	U.S. Geological Survey	USGS		42.75	-117.633	0.01	8	8	8	UNKNOWN	SEDIMENTARY	UNKNOWN	UNKNOWN	MUDSTONE
D132683		USGS		Geochemistry of rock samples from the National Geochemical Database: U.S. Geological Survey, Reston, VA.	U.S. Geological Survey	USGS		42.75	-117.633	0.01	8	8	8	UNKNOWN	SEDIMENTARY	UNKNOWN	UNKNOWN	MUDSTONE
D132685		USGS		Geochemistry of rock samples from the National Geochemical Database: U.S. Geological Survey, Reston, VA.	U.S. Geological Survey	USGS		42.75	-117.633	0.01	8	8	8	UNKNOWN	SEDIMENTARY	UNKNOWN	UNKNOWN	MUDSTONE
D132686		USGS		Geochemistry of rock samples from the National Geochemical Database: U.S. Geological Survey, Reston, VA.	U.S. Geological Survey	USGS		42.75	-117.633	0.01	8	8	8	UNKNOWN	SEDIMENTARY	UNKNOWN	UNKNOWN	MUDSTONE
D132687		USGS		Geochemistry of rock samples from the National Geochemical Database: U.S. Geological Survey, Reston, VA.	U.S. Geological Survey	USGS		42.75	-117.633	0.01	8	8	8	UNKNOWN	SEDIMENTARY	UNKNOWN	UNKNOWN	MUDSTONE
D132689		USGS		Geochemistry of rock samples from the National Geochemical Database: U.S. Geological Survey, Reston, VA.	U.S. Geological Survey	USGS		42.75	-117.633	0.01	8	8	8	UNKNOWN	SEDIMENTARY	UNKNOWN	UNKNOWN	MUDSTONE
D132691		USGS		Geochemistry of rock samples from the National Geochemical Database: U.S. Geological Survey, Reston, VA.	U.S. Geological Survey	USGS		42.75	-117.633	0.01	8	8	8	UNKNOWN	SEDIMENTARY	UNKNOWN	UNKNOWN	MUDSTONE
D132693		USGS		Geochemistry of rock samples from the National Geochemical Database: U.S. Geological Survey, Reston, VA.	U.S. Geological Survey	USGS		42.75	-117.633	0.01	8	8	8	UNKNOWN	SEDIMENTARY	UNKNOWN	UNKNOWN	MUDSTONE
D132694		USGS		Geochemistry of rock samples from the National Geochemical Database: U.S. Geological Survey, Reston, VA.	U.S. Geological Survey	USGS		42.75	-117.633	0.01	8	8	8	UNKNOWN	SEDIMENTARY	UNKNOWN	UNKNOWN	MUDSTONE
D132717		USGS		Geochemistry of rock samples from the National Geochemical Database: U.S. Geological Survey, Reston, VA.	U.S. Geological Survey	USGS		42.75	-117.633	0.01	8	8	8	UNKNOWN	SEDIMENTARY	UNKNOWN	UNKNOWN	MUDSTONE
D132718		USGS		Geochemistry of rock samples from the National Geochemical Database: U.S. Geological Survey, Reston, VA.	U.S. Geological Survey	USGS		42.75	-117.633	0.01	8	8	8	UNKNOWN	SEDIMENTARY	UNKNOWN	UNKNOWN	MUDSTONE
D132728		USGS		Geochemistry of rock samples from the National Geochemical Database: U.S. Geological Survey, Reston, VA.	U.S. Geological Survey	USGS		42.75	-117.633	0.01	8	8	8	UNKNOWN	SEDIMENTARY	UNKNOWN	UNKNOWN	MUDSTONE
D133431		USGS		Geochemistry of rock samples from the National Geochemical Database: U.S. Geological Survey, Reston, VA.	U.S. Geological Survey	USGS		42.4833	-108.167	0.01	18	18	18	UNKNOWN	SEDIMENTARY	UNKNOWN	UNKNOWN	MUDSTONE		53.6	0.47	14.5		3		0.5		0.1	2.8	6.7	2.7	5	0.07								2.1	400	28	15	26
D135117		USGS		Geochemistry of rock samples from the National Geochemical Database: U.S. Geological Survey, Reston, VA.	U.S. Geological Survey	USGS		35.5	-108.5	0.01	56	56	56	UNKNOWN	SEDIMENTARY	UNKNOWN	UNKNOWN	MUDSTONE																							10	7000	7	10	15
D135193		USGS		Geochemistry of rock samples from the National Geochemical Database: U.S. Geological Survey, Reston, VA.	U.S. Geological Survey	USGS		35.5	-108.5	0.01	56	56	56	UNKNOWN	SEDIMENTARY	UNKNOWN	UNKNOWN	MUDSTONE																							1.5	70	5		15
D139938		USGS		Geochemistry of rock samples from the National Geochemical Database: U.S. Geological Survey, Reston, VA.	U.S. Geological Survey	USGS		46.7542	-101.775	0.01	22	22	22	UNKNOWN	SEDIMENTARY	UNKNOWN	UNKNOWN	MUDSTONE																							1	70	15	7	20
D140838		USGS		Geochemistry of rock samples from the National Geochemical Database: U.S. Geological Survey, Reston, VA.	U.S. Geological Survey	USGS		37.3667	-105	0.01	18	18	18	UNKNOWN	SEDIMENTARY	UNKNOWN	UNKNOWN	MUDSTONE																							1.5	500	7	7	30
D140840		USGS		Geochemistry of rock samples from the National Geochemical Database: U.S. Geological Survey, Reston, VA.	U.S. Geological Survey	USGS		37.3667	-105	0.01	18	18	18	UNKNOWN	SEDIMENTARY	UNKNOWN	UNKNOWN	MUDSTONE																							3	200	30	15	20
D141926		USGS		Geochemistry of rock samples from the National Geochemical Database: U.S. Geological Survey, Reston, VA.	U.S. Geological Survey	USGS		34.6167	-119.317	0.01	11	11	11	UNKNOWN	SEDIMENTARY	UNKNOWN	UNKNOWN	MUDSTONE															6.2
D141927		USGS		Geochemistry of rock samples from the National Geochemical Database: U.S. Geological Survey, Reston, VA.	U.S. Geological Survey	USGS		34.6167	-119.317	0.01	11	11	11	UNKNOWN	SEDIMENTARY	UNKNOWN	UNKNOWN	MUDSTONE															0.81
D141928		USGS		Geochemistry of rock samples from the National Geochemical Database: U.S. Geological Survey, Reston, VA.	U.S. Geological Survey	USGS		34.6167	-119.317	0.01	11	11	11	UNKNOWN	SEDIMENTARY	UNKNOWN	UNKNOWN	MUDSTONE															11.8
D141923		USGS		Geochemistry of rock samples from the National Geochemical Database: U.S. Geological Survey, Reston, VA.	U.S. Geological Survey	USGS		34.6167	-119.317	0.01	11	11	11	UNKNOWN	SEDIMENTARY	UNKNOWN	UNKNOWN	MUDSTONE															1.8
D141929		USGS		Geochemistry of rock samples from the National Geochemical Database: U.S. Geological Survey, Reston, VA.	U.S. Geological Survey	USGS		34.6167	-119.317	0.01	11	11	11	UNKNOWN	SEDIMENTARY	UNKNOWN	UNKNOWN	MUDSTONE															26.6
D141930		USGS		Geochemistry of rock samples from the National Geochemical Database: U.S. Geological Survey, Reston, VA.	U.S. Geological Survey	USGS		34.6167	-119.317	0.01	11	11	11	UNKNOWN	SEDIMENTARY	UNKNOWN	UNKNOWN	MUDSTONE															6
D141931		USGS		Geochemistry of rock samples from the National Geochemical Database: U.S. Geological Survey, Reston, VA.	U.S. Geological Survey	USGS		34.6167	-119.317	0.01	11	11	11	UNKNOWN	SEDIMENTARY	UNKNOWN	UNKNOWN	MUDSTONE															13.5
D141932		USGS		Geochemistry of rock samples from the National Geochemical Database: U.S. Geological Survey, Reston, VA.	U.S. Geological Survey	USGS		34.6167	-119.317	0.01	11	11	11	UNKNOWN	SEDIMENTARY	UNKNOWN	UNKNOWN	MUDSTONE															9.5
D141933		USGS		Geochemistry of rock samples from the National Geochemical Database: U.S. Geological Survey, Reston, VA.	U.S. Geological Survey	USGS		34.6167	-119.317	0.01	11	11	11	UNKNOWN	SEDIMENTARY	UNKNOWN	UNKNOWN	MUDSTONE															14.5
D141934		USGS		Geochemistry of rock samples from the National Geochemical Database: U.S. Geological Survey, Reston, VA.	U.S. Geological Survey	USGS		34.6167	-119.317	0.01	11	11	11	UNKNOWN	SEDIMENTARY	UNKNOWN	UNKNOWN	MUDSTONE															10
D141935		USGS		Geochemistry of rock samples from the National Geochemical Database: U.S. Geological Survey, Reston, VA.	U.S. Geological Survey	USGS		34.6167	-119.317	0.01	11	11	11	UNKNOWN	SEDIMENTARY	UNKNOWN	UNKNOWN	MUDSTONE															0.64
D141936		USGS		Geochemistry of rock samples from the National Geochemical Database: U.S. Geological Survey, Reston, VA.	U.S. Geological Survey	USGS		34.6167	-119.317	0.01	11	11	11	UNKNOWN	SEDIMENTARY	UNKNOWN	UNKNOWN	MUDSTONE															11.5
D141937		USGS		Geochemistry of rock samples from the National Geochemical Database: U.S. Geological Survey, Reston, VA.	U.S. Geological Survey	USGS		34.6167	-119.317	0.01	11	11	11	UNKNOWN	SEDIMENTARY	UNKNOWN	UNKNOWN	MUDSTONE															22.3
D141938		USGS		Geochemistry of rock samples from the National Geochemical Database: U.S. Geological Survey, Reston, VA.	U.S. Geological Survey	USGS		34.6167	-119.317	0.01	11	11	11	UNKNOWN	SEDIMENTARY	UNKNOWN	UNKNOWN	MUDSTONE															21.6
D141939		USGS		Geochemistry of rock samples from the National Geochemical Database: U.S. Geological Survey, Reston, VA.	U.S. Geological Survey	USGS		34.6167	-119.317	0.01	11	11	11	UNKNOWN	SEDIMENTARY	UNKNOWN	UNKNOWN	MUDSTONE															10
D141940		USGS		Geochemistry of rock samples from the National Geochemical Database: U.S. Geological Survey, Reston, VA.	U.S. Geological Survey	USGS		34.6167	-119.317	0.01	11	11	11	UNKNOWN	SEDIMENTARY	UNKNOWN	UNKNOWN	MUDSTONE															5
D141941		USGS		Geochemistry of rock samples from the National Geochemical Database: U.S. Geological Survey, Reston, VA.	U.S. Geological Survey	USGS		34.6167	-119.317	0.01	11	11	11	UNKNOWN	SEDIMENTARY	UNKNOWN	UNKNOWN	MUDSTONE															1.4
D141942		USGS		Geochemistry of rock samples from the National Geochemical Database: U.S. Geological Survey, Reston, VA.	U.S. Geological Survey	USGS		34.6167	-119.317	0.01	11	11	11	UNKNOWN	SEDIMENTARY	UNKNOWN	UNKNOWN	MUDSTONE															23.5
D141943		USGS		Geochemistry of rock samples from the National Geochemical Database: U.S. Geological Survey, Reston, VA.	U.S. Geological Survey	USGS		34.6167	-119.317	0.01	11	11	11	UNKNOWN	SEDIMENTARY	UNKNOWN	UNKNOWN	MUDSTONE															9.4
D141944		USGS		Geochemistry of rock samples from the National Geochemical Database: U.S. Geological Survey, Reston, VA.	U.S. Geological Survey	USGS		34.6167	-119.317	0.01	11	11	11	UNKNOWN	SEDIMENTARY	UNKNOWN	UNKNOWN	MUDSTONE															5.5
D141945		USGS		Geochemistry of rock samples from the National Geochemical Database: U.S. Geological Survey, Reston, VA.	U.S. Geological Survey	USGS		34.6167	-119.317	0.01	11	11	11	UNKNOWN	SEDIMENTARY	UNKNOWN	UNKNOWN	MUDSTONE															9.8
D141949		USGS		Geochemistry of rock samples from the National Geochemical Database: U.S. Geological Survey, Reston, VA.	U.S. Geological Survey	USGS		34.6167	-119.317	0.01	11	11	11	UNKNOWN	SEDIMENTARY	UNKNOWN	UNKNOWN	MUDSTONE															24.4
D141950		USGS		Geochemistry of rock samples from the National Geochemical Database: U.S. Geological Survey, Reston, VA.	U.S. Geological Survey	USGS		34.6167	-119.317	0.01	11	11	11	UNKNOWN	SEDIMENTARY	UNKNOWN	UNKNOWN	MUDSTONE															6.2
D141951		USGS		Geochemistry of rock samples from the National Geochemical Database: U.S. Geological Survey, Reston, VA.	U.S. Geological Survey	USGS		34.6167	-119.317	0.01	11	11	11	UNKNOWN	SEDIMENTARY	UNKNOWN	UNKNOWN	MUDSTONE															11
D141952		USGS		Geochemistry of rock samples from the National Geochemical Database: U.S. Geological Survey, Reston, VA.	U.S. Geological Survey	USGS		34.6167	-119.317	0.01	11	11	11	UNKNOWN	SEDIMENTARY	UNKNOWN	UNKNOWN	MUDSTONE															1.7
D141953		USGS		Geochemistry of rock samples from the National Geochemical Database: U.S. Geological Survey, Reston, VA.	U.S. Geological Survey	USGS		34.6167	-119.317	0.01	11	11	11	UNKNOWN	SEDIMENTARY	UNKNOWN	UNKNOWN	MUDSTONE															25.1
D141954		USGS		Geochemistry of rock samples from the National Geochemical Database: U.S. Geological Survey, Reston, VA.	U.S. Geological Survey	USGS		34.6167	-119.317	0.01	11	11	11	UNKNOWN	SEDIMENTARY	UNKNOWN	UNKNOWN	MUDSTONE															6.9
D141955		USGS		Geochemistry of rock samples from the National Geochemical Database: U.S. Geological Survey, Reston, VA.	U.S. Geological Survey	USGS		34.6167	-119.317	0.01	11	11	11	UNKNOWN	SEDIMENTARY	UNKNOWN	UNKNOWN	MUDSTONE															1.9
D141956		USGS		Geochemistry of rock samples from the National Geochemical Database: U.S. Geological Survey, Reston, VA.	U.S. Geological Survey	USGS		34.6167	-119.317	0.01	11	11	11	UNKNOWN	SEDIMENTARY	UNKNOWN	UNKNOWN	MUDSTONE															6.7
D141966		USGS		Geochemistry of rock samples from the National Geochemical Database: U.S. Geological Survey, Reston, VA.	U.S. Geological Survey	USGS		34.6167	-119.317	0.01	11	11	11	UNKNOWN	SEDIMENTARY	UNKNOWN	UNKNOWN	MUDSTONE															1.4
D141967		USGS		Geochemistry of rock samples from the National Geochemical Database: U.S. Geological Survey, Reston, VA.	U.S. Geological Survey	USGS		34.6167	-119.317	0.01	11	11	11	UNKNOWN	SEDIMENTARY	UNKNOWN	UNKNOWN	MUDSTONE															10.4
D141968		USGS		Geochemistry of rock samples from the National Geochemical Database: U.S. Geological Survey, Reston, VA.	U.S. Geological Survey	USGS		34.6167	-119.317	0.01	11	11	11	UNKNOWN	SEDIMENTARY	UNKNOWN	UNKNOWN	MUDSTONE															9.5
D141969		USGS		Geochemistry of rock samples from the National Geochemical Database: U.S. Geological Survey, Reston, VA.	U.S. Geological Survey	USGS		34.6167	-119.317	0.01	11	11	11	UNKNOWN	SEDIMENTARY	UNKNOWN	UNKNOWN	MUDSTONE															6.4
D141970		USGS		Geochemistry of rock samples from the National Geochemical Database: U.S. Geological Survey, Reston, VA.	U.S. Geological Survey	USGS		34.6167	-119.317	0.01	11	11	11	UNKNOWN	SEDIMENTARY	UNKNOWN	UNKNOWN	MUDSTONE															8.8
D141971		USGS		Geochemistry of rock samples from the National Geochemical Database: U.S. Geological Survey, Reston, VA.	U.S. Geological Survey	USGS		34.6167	-119.317	0.01	11	11	11	UNKNOWN	SEDIMENTARY	UNKNOWN	UNKNOWN	MUDSTONE															16.7
D141972		USGS		Geochemistry of rock samples from the National Geochemical Database: U.S. Geological Survey, Reston, VA.	U.S. Geological Survey	USGS		34.6167	-119.317	0.01	11	11	11	UNKNOWN	SEDIMENTARY	UNKNOWN	UNKNOWN	MUDSTONE															16.6
D141973		USGS		Geochemistry of rock samples from the National Geochemical Database: U.S. Geological Survey, Reston, VA.	U.S. Geological Survey	USGS		34.6167	-119.317	0.01	11	11	11	UNKNOWN	SEDIMENTARY	UNKNOWN	UNKNOWN	MUDSTONE															19.6
D141974		USGS		Geochemistry of rock samples from the National Geochemical Database: U.S. Geological Survey, Reston, VA.	U.S. Geological Survey	USGS		34.6167	-119.317	0.01	11	11	11	UNKNOWN	SEDIMENTARY	UNKNOWN	UNKNOWN	MUDSTONE															20.6
D141976		USGS		Geochemistry of rock samples from the National Geochemical Database: U.S. Geological Survey, Reston, VA.	U.S. Geological Survey	USGS		34.6167	-119.317	0.01	11	11	11	UNKNOWN	SEDIMENTARY	UNKNOWN	UNKNOWN	MUDSTONE															6.5
D141977		USGS		Geochemistry of rock samples from the National Geochemical Database: U.S. Geological Survey, Reston, VA.	U.S. Geological Survey	USGS		34.6167	-119.317	0.01	11	11	11	UNKNOWN	SEDIMENTARY	UNKNOWN	UNKNOWN	MUDSTONE															0.64
D141978		USGS		Geochemistry of rock samples from the National Geochemical Database: U.S. Geological Survey, Reston, VA.	U.S. Geological Survey	USGS		34.6167	-119.317	0.01	11	11	11	UNKNOWN	SEDIMENTARY	UNKNOWN	UNKNOWN	MUDSTONE															8.1
D141979		USGS		Geochemistry of rock samples from the National Geochemical Database: U.S. Geological Survey, Reston, VA.	U.S. Geological Survey	USGS		34.6167	-119.317	0.01	11	11	11	UNKNOWN	SEDIMENTARY	UNKNOWN	UNKNOWN	MUDSTONE															10.7
D141980		USGS		Geochemistry of rock samples from the National Geochemical Database: U.S. Geological Survey, Reston, VA.	U.S. Geological Survey	USGS		34.6167	-119.317	0.01	11	11	11	UNKNOWN	SEDIMENTARY	UNKNOWN	UNKNOWN	MUDSTONE															30.8
D141981		USGS		Geochemistry of rock samples from the National Geochemical Database: U.S. Geological Survey, Reston, VA.	U.S. Geological Survey	USGS		34.6167	-119.317	0.01	11	11	11	UNKNOWN	SEDIMENTARY	UNKNOWN	UNKNOWN	MUDSTONE															31.6
D141982		USGS		Geochemistry of rock samples from the National Geochemical Database: U.S. Geological Survey, Reston, VA.	U.S. Geological Survey	USGS		34.6167	-119.317	0.01	11	11	11	UNKNOWN	SEDIMENTARY	UNKNOWN	UNKNOWN	MUDSTONE															8.2
D141983		USGS		Geochemistry of rock samples from the National Geochemical Database: U.S. Geological Survey, Reston, VA.	U.S. Geological Survey	USGS		34.6167	-119.317	0.01	11	11	11	UNKNOWN	SEDIMENTARY	UNKNOWN	UNKNOWN	MUDSTONE															9
D141984		USGS		Geochemistry of rock samples from the National Geochemical Database: U.S. Geological Survey, Reston, VA.	U.S. Geological Survey	USGS		34.6167	-119.317	0.01	11	11	11	UNKNOWN	SEDIMENTARY	UNKNOWN	UNKNOWN	MUDSTONE															1.4
D142240		USGS		Geochemistry of rock samples from the National Geochemical Database: U.S. Geological Survey, Reston, VA.	U.S. Geological Survey	USGS		34.6333	-113.55	0.01	8	8	8	UNKNOWN	SEDIMENTARY	UNKNOWN	UNKNOWN	MUDSTONE																							7	1500	50	20	100
D142241		USGS		Geochemistry of rock samples from the National Geochemical Database: U.S. Geological Survey, Reston, VA.	U.S. Geological Survey	USGS		34.6333	-113.55	0.01	8	8	8	UNKNOWN	SEDIMENTARY	UNKNOWN	UNKNOWN	MUDSTONE																							7	1000	30	15	50
D142242		USGS		Geochemistry of rock samples from the National Geochemical Database: U.S. Geological Survey, Reston, VA.	U.S. Geological Survey	USGS		34.6333	-113.55	0.01	8	8	8	UNKNOWN	SEDIMENTARY	UNKNOWN	UNKNOWN	MUDSTONE																							7	1000	30	20	50
D142243		USGS		Geochemistry of rock samples from the National Geochemical Database: U.S. Geological Survey, Reston, VA.	U.S. Geological Survey	USGS		34.7	-113.583	0.01	8	8	8	UNKNOWN	SEDIMENTARY	UNKNOWN	UNKNOWN	MUDSTONE																							7	700	100	20	50
D142244		USGS		Geochemistry of rock samples from the National Geochemical Database: U.S. Geological Survey, Reston, VA.	U.S. Geological Survey	USGS		34.7	-113.583	0.01	8	8	8	UNKNOWN	SEDIMENTARY	UNKNOWN	UNKNOWN	MUDSTONE																							7	1000	70	15	30
D142245		USGS		Geochemistry of rock samples from the National Geochemical Database: U.S. Geological Survey, Reston, VA.	U.S. Geological Survey	USGS		34.7	-113.583	0.01	8	8	8	UNKNOWN	SEDIMENTARY	UNKNOWN	UNKNOWN	MUDSTONE																							5	500	30	10	20
D142246		USGS		Geochemistry of rock samples from the National Geochemical Database: U.S. Geological Survey, Reston, VA.	U.S. Geological Survey	USGS		34.7	-113.583	0.01	8	8	8	UNKNOWN	SEDIMENTARY	UNKNOWN	UNKNOWN	MUDSTONE																							7	700	70	20	100
D142247		USGS		Geochemistry of rock samples from the National Geochemical Database: U.S. Geological Survey, Reston, VA.	U.S. Geological Survey	USGS		34.75	-113.583	0.01	8	8	8	UNKNOWN	SEDIMENTARY	UNKNOWN	UNKNOWN	MUDSTONE																							3	1000	30	15	30
D142248		USGS		Geochemistry of rock samples from the National Geochemical Database: U.S. Geological Survey, Reston, VA.	U.S. Geological Survey	USGS		34.75	-113.583	0.01	8	8	8	UNKNOWN	SEDIMENTARY	UNKNOWN	UNKNOWN	MUDSTONE																							5	700	70	20	30
D142883		USGS		Geochemistry of rock samples from the National Geochemical Database: U.S. Geological Survey, Reston, VA.	U.S. Geological Survey	USGS		34.6167	-119.317	0.01	11	11	11	UNKNOWN	SEDIMENTARY	UNKNOWN	UNKNOWN	MUDSTONE															7
D144289		USGS		Geochemistry of rock samples from the National Geochemical Database: U.S. Geological Survey, Reston, VA.	U.S. Geological Survey	USGS		37.375	-115.125	0.01	8	8	8	UNKNOWN	SEDIMENTARY	UNKNOWN	UNKNOWN	MUDSTONE																							1.5	300	7	3	7
D144643		USGS		Geochemistry of rock samples from the National Geochemical Database: U.S. Geological Survey, Reston, VA.	U.S. Geological Survey	USGS		41.0833	-112.383	0.01	18	18	18	UNKNOWN	SEDIMENTARY	UNKNOWN	UNKNOWN	MUDSTONE		54.9	0.43	11.2						0.04	4.3	7	1.5	3.8	0.18								2.8	800	23	12	28
D144644		USGS		Geochemistry of rock samples from the National Geochemical Database: U.S. Geological Survey, Reston, VA.	U.S. Geological Survey	USGS		40.8833	-107.983	0.01	18	18	18	UNKNOWN	SEDIMENTARY	UNKNOWN	UNKNOWN	MUDSTONE		49.2	0.5	12.1						0.44	1.4	12	0.13	2.3	0.21								2.5	3400	22	11	20
D144646		USGS		Geochemistry of rock samples from the National Geochemical Database: U.S. Geological Survey, Reston, VA.	U.S. Geological Survey	USGS		39.4333	-111.75	0.01	18	18	18	UNKNOWN	SEDIMENTARY	UNKNOWN	UNKNOWN	MUDSTONE		62.5	0.69	14.1						0.04	1.5	2.5	3.6	3	0.12								3.6	420	32	13	47
D144647		USGS		Geochemistry of rock samples from the National Geochemical Database: U.S. Geological Survey, Reston, VA.	U.S. Geological Survey	USGS		43.65	-106.217	0.01	18	18	18	UNKNOWN	SEDIMENTARY	UNKNOWN	UNKNOWN	MUDSTONE		79.6	0.55	10.1						0.04	0.64	0.01	0.56	1.8	0.02								0.91	40	14		12
D144648		USGS		Geochemistry of rock samples from the National Geochemical Database: U.S. Geological Survey, Reston, VA.	U.S. Geological Survey	USGS		43.5833	-109.6	0.01	18	18	18	UNKNOWN	SEDIMENTARY	UNKNOWN	UNKNOWN	MUDSTONE		59.2	0.62	14.1						0.04	2.8	3.3	0.67	2.6	0.14								3.1	180	41	15	36
D144649		USGS		Geochemistry of rock samples from the National Geochemical Database: U.S. Geological Survey, Reston, VA.	U.S. Geological Survey	USGS		41.2	-108.833	0.01	18	18	18	UNKNOWN	SEDIMENTARY	UNKNOWN	UNKNOWN	MUDSTONE		68.7	0.46	11.2						0.04	2.4	2.8	1.2	2.8	0.16								1.8	390	18	8	22
D144650		USGS		Geochemistry of rock samples from the National Geochemical Database: U.S. Geological Survey, Reston, VA.	U.S. Geological Survey	USGS		44.2167	-106.417	0.01	18	18	18	UNKNOWN	SEDIMENTARY	UNKNOWN	UNKNOWN	MUDSTONE		61.9	0.68	17.2						0.04	2.1	0.11	0.5	3.1	0.12								2.3	130	24	11	46
D144651		USGS		Geochemistry of rock samples from the National Geochemical Database: U.S. Geological Survey, Reston, VA.	U.S. Geological Survey	USGS		40.9167	-108.117	0.01	18	18	18	UNKNOWN	SEDIMENTARY	UNKNOWN	UNKNOWN	MUDSTONE		54.1	0.75	19.5						0.04	1.8	0.74		3.2	0.13								4	150	26	13	37
D144652		USGS		Geochemistry of rock samples from the National Geochemical Database: U.S. Geological Survey, Reston, VA.	U.S. Geological Survey	USGS		42.3	-107.867	0.01	18	18	18	UNKNOWN	SEDIMENTARY	UNKNOWN	UNKNOWN	MUDSTONE		71.8	0.31	15.4						0.04	0.42	0.22	2.6	3.7	0.01								1.6	57	10		6
D144655		USGS		Geochemistry of rock samples from the National Geochemical Database: U.S. Geological Survey, Reston, VA.	U.S. Geological Survey	USGS		37.3167	-104.95	0.01	18	18	18	UNKNOWN	SEDIMENTARY	UNKNOWN	UNKNOWN	MUDSTONE		58.5	0.89	16.6						0.04	2.3	1.3	0.76	4.3	0.17								4.8	710	38	19	54
D144657		USGS		Geochemistry of rock samples from the National Geochemical Database: U.S. Geological Survey, Reston, VA.	U.S. Geological Survey	USGS		40.6833	-108.6	0.01	18	18	18	UNKNOWN	SEDIMENTARY	UNKNOWN	UNKNOWN	MUDSTONE		54.1	0.34	7.8						0.33	1.8	15	0.57	1.5	0.11								0.95	2700	18	9	16
D144658		USGS		Geochemistry of rock samples from the National Geochemical Database: U.S. Geological Survey, Reston, VA.	U.S. Geological Survey	USGS		41.0833	-112.383	0.01	18	18	18	UNKNOWN	SEDIMENTARY	UNKNOWN	UNKNOWN	MUDSTONE		55.3	0.43	11.4						0.04	4.1	7.3	1.3	3.8	0.18								2.2	700	23	12	26
D144659		USGS		Geochemistry of rock samples from the National Geochemical Database: U.S. Geological Survey, Reston, VA.	U.S. Geological Survey	USGS		41.5167	-111.367	0.01	18	18	18	UNKNOWN	SEDIMENTARY	UNKNOWN	UNKNOWN	MUDSTONE		83.6	0.5	8.2						0.04	0.09	0.48		0.22	0.02								1.5	17	15		20
D144660		USGS		Geochemistry of rock samples from the National Geochemical Database: U.S. Geological Survey, Reston, VA.	U.S. Geological Survey	USGS		42.3	-106.083	0.01	18	18	18	UNKNOWN	SEDIMENTARY	UNKNOWN	UNKNOWN	MUDSTONE		64.5	0.63	18						0.04	0.51	0.48	0.09	2.8	0.02								1.4	33	12		9
D144661		USGS		Geochemistry of rock samples from the National Geochemical Database: U.S. Geological Survey, Reston, VA.	U.S. Geological Survey	USGS		41.4167	-109.367	0.01	18	18	18	UNKNOWN	SEDIMENTARY	UNKNOWN	UNKNOWN	MUDSTONE		69.1	0.55	11.3						0.04	2.3	2.2	1.1	2.6	0.32								2.2	240	32	12	36
D144662		USGS		Geochemistry of rock samples from the National Geochemical Database: U.S. Geological Survey, Reston, VA.	U.S. Geological Survey	USGS		42.25	-107.9	0.01	18	18	18	UNKNOWN	SEDIMENTARY	UNKNOWN	UNKNOWN	MUDSTONE		66.8	0.36	17.1						0.04	0.35	0.7	0.74	3.2	0.02								2.3	23	7		9
D144663		USGS		Geochemistry of rock samples from the National Geochemical Database: U.S. Geological Survey, Reston, VA.	U.S. Geological Survey	USGS		41.5333	-111.333	0.01	18	18	18	UNKNOWN	SEDIMENTARY	UNKNOWN	UNKNOWN	MUDSTONE		79.1	0.63	10.8						0.04	0.06	0.16		0.19	0.09								1.8	39	19		23
D144664		USGS		Geochemistry of rock samples from the National Geochemical Database: U.S. Geological Survey, Reston, VA.	U.S. Geological Survey	USGS		41.1833	-108.833	0.01	18	18	18	UNKNOWN	SEDIMENTARY	UNKNOWN	UNKNOWN	MUDSTONE		64.5	0.56	17.9						0.04	1.4		1	4.5	0.04								2	100	15		27
D144665		USGS		Geochemistry of rock samples from the National Geochemical Database: U.S. Geological Survey, Reston, VA.	U.S. Geological Survey	USGS		42.0333	-106.45	0.01	18	18	18	UNKNOWN	SEDIMENTARY	UNKNOWN	UNKNOWN	MUDSTONE		61.9	0.71	16.8						0.04	1.6	0.48	0.9	2	0.05								2.2	40	22		37
D144666		USGS		Geochemistry of rock samples from the National Geochemical Database: U.S. Geological Survey, Reston, VA.	U.S. Geological Survey	USGS		42.3	-106.067	0.01	18	18	18	UNKNOWN	SEDIMENTARY	UNKNOWN	UNKNOWN	MUDSTONE		73	0.36	13.4						0.04	0.51	1	0.57	3.5	0.01								1.1	23	9		5
D144668		USGS		Geochemistry of rock samples from the National Geochemical Database: U.S. Geological Survey, Reston, VA.	U.S. Geological Survey	USGS		43.9333	-108.867	0.01	18	18	18	UNKNOWN	SEDIMENTARY	UNKNOWN	UNKNOWN	MUDSTONE		55	0.86	19.3						0.02	1.7	2	0.09	2.4	0.17								2.4	200	43	13	33
D144669		USGS		Geochemistry of rock samples from the National Geochemical Database: U.S. Geological Survey, Reston, VA.	U.S. Geological Survey	USGS		42.3	-106.067	0.01	18	18	18	UNKNOWN	SEDIMENTARY	UNKNOWN	UNKNOWN	MUDSTONE		66.3	0.68	18.6						0.04	0.26	0.06	0.19	3.6	0.03								1.4	43	12		13
D144670		USGS		Geochemistry of rock samples from the National Geochemical Database: U.S. Geological Survey, Reston, VA.	U.S. Geological Survey	USGS		41.0833	-112.383	0.01	18	18	18	UNKNOWN	SEDIMENTARY	UNKNOWN	UNKNOWN	MUDSTONE		55	0.41	11.4						0.04	4.1	7.3	1.4	3.8	0.18								2.2	800	21	11	27
D144671		USGS		Geochemistry of rock samples from the National Geochemical Database: U.S. Geological Survey, Reston, VA.	U.S. Geological Survey	USGS		39.2333	-108.15	0.01	18	18	18	UNKNOWN	SEDIMENTARY	UNKNOWN	UNKNOWN	MUDSTONE		76.8	0.33	7.9						0.02	1.5		0.51	1.5									4.2	140	19	17	12
D144672		USGS		Geochemistry of rock samples from the National Geochemical Database: U.S. Geological Survey, Reston, VA.	U.S. Geological Survey	USGS		41.0667	-107.683	0.01	18	18	18	UNKNOWN	SEDIMENTARY	UNKNOWN	UNKNOWN	MUDSTONE		61.9	0.68	18.2						0.02	1.2	0.09	0.64	2.3	0.12								2.4	45	17		31
D144673		USGS		Geochemistry of rock samples from the National Geochemical Database: U.S. Geological Survey, Reston, VA.	U.S. Geological Survey	USGS		43.7833	-105.933	0.01	18	18	18	UNKNOWN	SEDIMENTARY	UNKNOWN	UNKNOWN	MUDSTONE		67.1	0.46	10.7						0.02	1.7	4		2.3	0.15								1.3	200	19	8	20
D144674		USGS		Geochemistry of rock samples from the National Geochemical Database: U.S. Geological Survey, Reston, VA.	U.S. Geological Survey	USGS		41.8667	-108	0.01	18	18	18	UNKNOWN	SEDIMENTARY	UNKNOWN	UNKNOWN	MUDSTONE		63.5	0.57	13.8						0.02	2.7	2.8	1	3	0.17								3.2	400	30	14	36
D144675		USGS		Geochemistry of rock samples from the National Geochemical Database: U.S. Geological Survey, Reston, VA.	U.S. Geological Survey	USGS		41.0833	-112.383	0.01	18	18	18	UNKNOWN	SEDIMENTARY	UNKNOWN	UNKNOWN	MUDSTONE		54.9	0.39	11.2						0.04	4.2	7.3	1.3	3.8	0.18								2.4	600	21	11	26
D144676		USGS		Geochemistry of rock samples from the National Geochemical Database: U.S. Geological Survey, Reston, VA.	U.S. Geological Survey	USGS		41.85	-110.767	0.01	18	18	18	UNKNOWN	SEDIMENTARY	UNKNOWN	UNKNOWN	MUDSTONE		69.4	0.34	9.3						0.02	1.5	5.4	0.13	1.5	0.3								1.1	300	13		12
D144677		USGS		Geochemistry of rock samples from the National Geochemical Database: U.S. Geological Survey, Reston, VA.	U.S. Geological Survey	USGS		43.65	-106.217	0.01	18	18	18	UNKNOWN	SEDIMENTARY	UNKNOWN	UNKNOWN	MUDSTONE		65.8	0.63	15.5						0.02	0.96	0.42	0.32	2	0.04								2.1	67	24	10	24
D144678		USGS		Geochemistry of rock samples from the National Geochemical Database: U.S. Geological Survey, Reston, VA.	U.S. Geological Survey	USGS		41	-111.617	0.01	18	18	18	UNKNOWN	SEDIMENTARY	UNKNOWN	UNKNOWN	MUDSTONE		69.1	0.16	3.6						0.04	0.83	12.4		0.51	0.12								0.53	140	11		7
D144679		USGS		Geochemistry of rock samples from the National Geochemical Database: U.S. Geological Survey, Reston, VA.	U.S. Geological Survey	USGS		37.7833	-105.25	0.01	18	18	18	UNKNOWN	SEDIMENTARY	UNKNOWN	UNKNOWN	MUDSTONE		66.9	0.61	14.9						0.02	0.96	1.1	1.3	3.2	0.13								2.9	400	30	13	32
D144680		USGS		Geochemistry of rock samples from the National Geochemical Database: U.S. Geological Survey, Reston, VA.	U.S. Geological Survey	USGS		40.9	-107.533	0.01	18	18	18	UNKNOWN	SEDIMENTARY	UNKNOWN	UNKNOWN	MUDSTONE		67.4	0.53	10.3						0.02	1.4	5.2	0.93	2.3	0.15								1.6	370	21	13	18
D144681		USGS		Geochemistry of rock samples from the National Geochemical Database: U.S. Geological Survey, Reston, VA.	U.S. Geological Survey	USGS		35.4167	-106.067	0.01	18	18	18	UNKNOWN	SEDIMENTARY	UNKNOWN	UNKNOWN	MUDSTONE		52.3	0.59	16.7						0.04	2	5.4	0.16	2.6	0.17								2.6	240	32	13	32
D144682		USGS		Geochemistry of rock samples from the National Geochemical Database: U.S. Geological Survey, Reston, VA.	U.S. Geological Survey	USGS		41.8667	-110.767	0.01	18	18	18	UNKNOWN	SEDIMENTARY	UNKNOWN	UNKNOWN	MUDSTONE		59.7	0.51	13.3						0.02	1.9	5.6	0.22	2.3	0.31								2.1	540	24	11	20
D144683		USGS		Geochemistry of rock samples from the National Geochemical Database: U.S. Geological Survey, Reston, VA.	U.S. Geological Survey	USGS		42.3	-106.067	0.01	18	18	18	UNKNOWN	SEDIMENTARY	UNKNOWN	UNKNOWN	MUDSTONE		60	0.67	20.1						0.02	0.8	1.2	0.16	2.6	0.02								1	24	11		19
D144684		USGS		Geochemistry of rock samples from the National Geochemical Database: U.S. Geological Survey, Reston, VA.	U.S. Geological Survey	USGS		43.35	-107.617	0.01	18	18	18	UNKNOWN	SEDIMENTARY	UNKNOWN	UNKNOWN	MUDSTONE		57.4	0.61	11.1						0.04	3.6	6.5		2.7	0.17								1.8	210	23	10	22
D144685		USGS		Geochemistry of rock samples from the National Geochemical Database: U.S. Geological Survey, Reston, VA.	U.S. Geological Survey	USGS		39.4167	-111.75	0.01	18	18	18	UNKNOWN	SEDIMENTARY	UNKNOWN	UNKNOWN	MUDSTONE		66.7	0.66	14.5						0.02	1.2	0.7	1.3	3.3	0.16								3.3	370	30	11	33
D144686		USGS		Geochemistry of rock samples from the National Geochemical Database: U.S. Geological Survey, Reston, VA.	U.S. Geological Survey	USGS		39.4667	-110.283	0.01	18	18	18	UNKNOWN	SEDIMENTARY	UNKNOWN	UNKNOWN	MUDSTONE		52.6	0.68	18.2						0.02	1.9	2.6	5.3	2.1	0.18								3.2	500	31	15	37
D144687		USGS		Geochemistry of rock samples from the National Geochemical Database: U.S. Geological Survey, Reston, VA.	U.S. Geological Survey	USGS		41.0833	-112.383	0.01	18	18	18	UNKNOWN	SEDIMENTARY	UNKNOWN	UNKNOWN	MUDSTONE		54.9	0.36	11.3						0.04	4.1	7	1.3	3.8	0.19								2.7	800	22	11	28
D144688		USGS		Geochemistry of rock samples from the National Geochemical Database: U.S. Geological Survey, Reston, VA.	U.S. Geological Survey	USGS		42.95	-107.217	0.01	18	18	18	UNKNOWN	SEDIMENTARY	UNKNOWN	UNKNOWN	MUDSTONE		56.9	0.61	16.5						0.02	1.7	3	1.4	2.3	0.07								2.7	260	35	13	53
D144689		USGS		Geochemistry of rock samples from the National Geochemical Database: U.S. Geological Survey, Reston, VA.	U.S. Geological Survey	USGS		37.3333	-104.983	0.01	18	18	18	UNKNOWN	SEDIMENTARY	UNKNOWN	UNKNOWN	MUDSTONE		67.8	0.58	14.7						0.02	1.5	0.86	1.2	4.1	0.18								4.3	800	23	12	26
D144690		USGS		Geochemistry of rock samples from the National Geochemical Database: U.S. Geological Survey, Reston, VA.	U.S. Geological Survey	USGS		43.9333	-108.867	0.01	18	18	18	UNKNOWN	SEDIMENTARY	UNKNOWN	UNKNOWN	MUDSTONE		57.3	0.79	21.7						0.04	0.96	0.34		1.4	0.07								3.1	100	27		36
D144691		USGS		Geochemistry of rock samples from the National Geochemical Database: U.S. Geological Survey, Reston, VA.	U.S. Geological Survey	USGS		36.7333	-107.25	0.01	18	18	18	UNKNOWN	SEDIMENTARY	UNKNOWN	UNKNOWN	MUDSTONE		63.2	0.68	15.1						0.04	1.5	1.6	1.2	2.7	0.13								2.4	360	27	15	57
D144692		USGS		Geochemistry of rock samples from the National Geochemical Database: U.S. Geological Survey, Reston, VA.	U.S. Geological Survey	USGS		41.5167	-111.267	0.01	18	18	18	UNKNOWN	SEDIMENTARY	UNKNOWN	UNKNOWN	MUDSTONE		59.4	0.21	5.3						0.02	0.54	17.1	0.13	0.81	0.4								0.69	140	18		17
D144693		USGS		Geochemistry of rock samples from the National Geochemical Database: U.S. Geological Survey, Reston, VA.	U.S. Geological Survey	USGS		44.0667	-108.7	0.01	18	18	18	UNKNOWN	SEDIMENTARY	UNKNOWN	UNKNOWN	MUDSTONE		84	0.37	8.4						0.04	0.58	0.54	0.22	1.3									0.76	25	10		12
D144694		USGS		Geochemistry of rock samples from the National Geochemical Database: U.S. Geological Survey, Reston, VA.	U.S. Geological Survey	USGS		42.9667	-107.2	0.01	18	18	18	UNKNOWN	SEDIMENTARY	UNKNOWN	UNKNOWN	MUDSTONE		59.1	0.57	18.3						0.02	2.1	1.2	2.8	3.6	0.04								4.4	420	47	13	33
D144695		USGS		Geochemistry of rock samples from the National Geochemical Database: U.S. Geological Survey, Reston, VA.	U.S. Geological Survey	USGS		36.7167	-107.267	0.01	18	18	18	UNKNOWN	SEDIMENTARY	UNKNOWN	UNKNOWN	MUDSTONE		53.9	0.68	19.1						0.04	1.9	0.76	0.61	3.3	0.08								4.2	440	26	14	31
D144696		USGS		Geochemistry of rock samples from the National Geochemical Database: U.S. Geological Survey, Reston, VA.	U.S. Geological Survey	USGS		41.8667	-110.767	0.01	18	18	18	UNKNOWN	SEDIMENTARY	UNKNOWN	UNKNOWN	MUDSTONE		60.5	0.48	15.1						0.04	2.1	4.2	0.61	2.6	0.34								3.2	510	25	9	22
D144697		USGS		Geochemistry of rock samples from the National Geochemical Database: U.S. Geological Survey, Reston, VA.	U.S. Geological Survey	USGS		40.9	-107.533	0.01	18	18	18	UNKNOWN	SEDIMENTARY	UNKNOWN	UNKNOWN	MUDSTONE		72.2	0.63	12.5						0.01	1.5	1.6	0.57	2	0.09								1.9	240	19	10	23
D144699		USGS		Geochemistry of rock samples from the National Geochemical Database: U.S. Geological Survey, Reston, VA.	U.S. Geological Survey	USGS		42.35	-106.4	0.01	18	18	18	UNKNOWN	SEDIMENTARY	UNKNOWN	UNKNOWN	MUDSTONE		76.8	0.58	10.5						0.02	1.3	0.83	0.16	1.9	0.04								1.3	48	26	10	24
D144701		USGS		Geochemistry of rock samples from the National Geochemical Database: U.S. Geological Survey, Reston, VA.	U.S. Geological Survey	USGS		43.25	-107.5	0.01	18	18	18	UNKNOWN	SEDIMENTARY	UNKNOWN	UNKNOWN	MUDSTONE		50.2	0.41	9						0.25	1.9	16.2	0.93	1.9	0.14								1.5	1700	25	10	21
D144702		USGS		Geochemistry of rock samples from the National Geochemical Database: U.S. Geological Survey, Reston, VA.	U.S. Geological Survey	USGS		44.0667	-108.7	0.01	18	18	18	UNKNOWN	SEDIMENTARY	UNKNOWN	UNKNOWN	MUDSTONE		70.5	0.66	12.7						0.02	1.7	1.2	0.19	2.2	0.06								1.5	84	32	13	26
D144703		USGS		Geochemistry of rock samples from the National Geochemical Database: U.S. Geological Survey, Reston, VA.	U.S. Geological Survey	USGS		37.7833	-105.267	0.01	18	18	18	UNKNOWN	SEDIMENTARY	UNKNOWN	UNKNOWN	MUDSTONE		54.1	1.2	19.4						0.03	2	1.1	0.42	2.6	0.02								3.8	340	51	25	56
D144704		USGS		Geochemistry of rock samples from the National Geochemical Database: U.S. Geological Survey, Reston, VA.	U.S. Geological Survey	USGS		43.5333	-109.6	0.01	18	18	18	UNKNOWN	SEDIMENTARY	UNKNOWN	UNKNOWN	MUDSTONE		48.4	0.35	5.8						0.06	2.7	19.1	0.64	1.5	0.23								1.4	500	22	8	11
D144705		USGS		Geochemistry of rock samples from the National Geochemical Database: U.S. Geological Survey, Reston, VA.	U.S. Geological Survey	USGS		42.3667	-110.25	0.01	18	18	18	UNKNOWN	SEDIMENTARY	UNKNOWN	UNKNOWN	MUDSTONE		67.9	0.59	14.2						0.02	1.4	0.31	0.19	3.8	0.02								3.4	60	27		18
D144706		USGS		Geochemistry of rock samples from the National Geochemical Database: U.S. Geological Survey, Reston, VA.	U.S. Geological Survey	USGS		41.0833	-112.383	0.01	18	18	18	UNKNOWN	SEDIMENTARY	UNKNOWN	UNKNOWN	MUDSTONE		55.4	0.47	11.3						0.04	4.3	7	1.6	3.9	0.19								2.5	600	22	10	25
D144707		USGS		Geochemistry of rock samples from the National Geochemical Database: U.S. Geological Survey, Reston, VA.	U.S. Geological Survey	USGS		42.0667	-108.617	0.01	18	18	18	UNKNOWN	SEDIMENTARY	UNKNOWN	UNKNOWN	MUDSTONE		66.7	0.64	13						0.02	2	1.2	0.96	2.5	0.03								4.2	120	19		28
D144708		USGS		Geochemistry of rock samples from the National Geochemical Database: U.S. Geological Survey, Reston, VA.	U.S. Geological Survey	USGS		39.4167	-111.75	0.01	18	18	18	UNKNOWN	SEDIMENTARY	UNKNOWN	UNKNOWN	MUDSTONE		53.4	0.73	15.5						0.05	3	5.5	2.7	3.6	0.1								4.7	600	29	13	35
D144709		USGS		Geochemistry of rock samples from the National Geochemical Database: U.S. Geological Survey, Reston, VA.	U.S. Geological Survey	USGS		40.8833	-108.117	0.01	18	18	18	UNKNOWN	SEDIMENTARY	UNKNOWN	UNKNOWN	MUDSTONE		62.5	0.79	16.4						0.02	1.8	0.74	0.3	3.1	0.09								3.3	210	26	11	41
D144710		USGS		Geochemistry of rock samples from the National Geochemical Database: U.S. Geological Survey, Reston, VA.	U.S. Geological Survey	USGS		37.7833	-105.25	0.01	18	18	18	UNKNOWN	SEDIMENTARY	UNKNOWN	UNKNOWN	MUDSTONE		66.8	0.55	13.7						0.05	1.4	1.3	1.7	2.8	0.17								2.7	540	19	11	23
D144711		USGS		Geochemistry of rock samples from the National Geochemical Database: U.S. Geological Survey, Reston, VA.	U.S. Geological Survey	USGS		41.5333	-111.333	0.01	18	18	18	UNKNOWN	SEDIMENTARY	UNKNOWN	UNKNOWN	MUDSTONE		79.7	0.68	9.2						0.02	0.42	0.8	0.25	0.72	0.06								2.5	20	18		43
D144712		USGS		Geochemistry of rock samples from the National Geochemical Database: U.S. Geological Survey, Reston, VA.	U.S. Geological Survey	USGS		43.9333	-108.867	0.01	18	18	18	UNKNOWN	SEDIMENTARY	UNKNOWN	UNKNOWN	MUDSTONE		61	0.79	20.6						0.02	1.2	0.61	0.15	2.4	0.06								1.7	44	27	10	68
D144713		USGS		Geochemistry of rock samples from the National Geochemical Database: U.S. Geological Survey, Reston, VA.	U.S. Geological Survey	USGS		35.4167	-106.067	0.01	18	18	18	UNKNOWN	SEDIMENTARY	UNKNOWN	UNKNOWN	MUDSTONE		78.1	0.44	7.6						0.02	0.74	4	0.48	1.6	0.05								1.6	260	14		19
D144714		USGS		Geochemistry of rock samples from the National Geochemical Database: U.S. Geological Survey, Reston, VA.	U.S. Geological Survey	USGS		39.9333	-111.067	0.01	18	18	18	UNKNOWN	SEDIMENTARY	UNKNOWN	UNKNOWN	MUDSTONE		57.9	0.65	14						0.04	4.8	4	0.35	2.3	0.21								3	530	36	14	57
D144715		USGS		Geochemistry of rock samples from the National Geochemical Database: U.S. Geological Survey, Reston, VA.	U.S. Geological Survey	USGS		41.4167	-109.367	0.01	18	18	18	UNKNOWN	SEDIMENTARY	UNKNOWN	UNKNOWN	MUDSTONE		65.3	0.41	11.9						0.03	2.9	3.4	1.2	2.8	0.19								2.7	520	30	12	42
D144716		USGS		Geochemistry of rock samples from the National Geochemical Database: U.S. Geological Survey, Reston, VA.	U.S. Geological Survey	USGS		36.05	-107.033	0.01	18	18	18	UNKNOWN	SEDIMENTARY	UNKNOWN	UNKNOWN	MUDSTONE		62.2	0.76	16.4						0.02	1.5	1.5	0.35	1.8	0.05								3.2	150	24	13	37
D144717		USGS		Geochemistry of rock samples from the National Geochemical Database: U.S. Geological Survey, Reston, VA.	U.S. Geological Survey	USGS		44.0667	-108.7	0.01	18	18	18	UNKNOWN	SEDIMENTARY	UNKNOWN	UNKNOWN	MUDSTONE		76.9	0.6	10.5						0.02	1.2	0.8	0.67	2	0.09								1.6	67	20		19
D144718		USGS		Geochemistry of rock samples from the National Geochemical Database: U.S. Geological Survey, Reston, VA.	U.S. Geological Survey	USGS		43.55	-109.6	0.01	18	18	18	UNKNOWN	SEDIMENTARY	UNKNOWN	UNKNOWN	MUDSTONE		56.8	0.41	9						0.02	4.8	8.4	0.52	2.1	0.18								1.5	170	34	9	14
D144719		USGS		Geochemistry of rock samples from the National Geochemical Database: U.S. Geological Survey, Reston, VA.	U.S. Geological Survey	USGS		41.2	-108.833	0.01	18	18	18	UNKNOWN	SEDIMENTARY	UNKNOWN	UNKNOWN	MUDSTONE		70.8	0.6	14.9						0.02	1.2	0.9	1.4	4.2	0.01								1.9	64	12		16
D144720		USGS		Geochemistry of rock samples from the National Geochemical Database: U.S. Geological Survey, Reston, VA.	U.S. Geological Survey	USGS		41.2667	-110.833	0.01	18	18	18	UNKNOWN	SEDIMENTARY	UNKNOWN	UNKNOWN	MUDSTONE		62	0.58	11.8						0.02	2.3	5.3	0.55	2.4	0.44								2.2	130	36	8	42
D144721		USGS		Geochemistry of rock samples from the National Geochemical Database: U.S. Geological Survey, Reston, VA.	U.S. Geological Survey	USGS		42.3333	-106.4	0.01	18	18	18	UNKNOWN	SEDIMENTARY	UNKNOWN	UNKNOWN	MUDSTONE		64.6	0.61	15						0.02	1.4	1.7	1.3	2.8	0.07								2.7	190	24	10	22
D144722		USGS		Geochemistry of rock samples from the National Geochemical Database: U.S. Geological Survey, Reston, VA.	U.S. Geological Survey	USGS		43.25	-107.5	0.01	18	18	18	UNKNOWN	SEDIMENTARY	UNKNOWN	UNKNOWN	MUDSTONE		57.2	0.81	16.5						0.02	2.5	0.9	0.86	3.8	0.05								3.9	150	54	17	71
D144723		USGS		Geochemistry of rock samples from the National Geochemical Database: U.S. Geological Survey, Reston, VA.	U.S. Geological Survey	USGS		42.3667	-110.25	0.01	18	18	18	UNKNOWN	SEDIMENTARY	UNKNOWN	UNKNOWN	MUDSTONE		55	0.42	9.7						0.1	4.9	9.4	0.35	2.3	0.19								1.1	510	16	8	20
D144724		USGS		Geochemistry of rock samples from the National Geochemical Database: U.S. Geological Survey, Reston, VA.	U.S. Geological Survey	USGS		39.2333	-108.15	0.01	18	18	18	UNKNOWN	SEDIMENTARY	UNKNOWN	UNKNOWN	MUDSTONE		65.9	0.69	15.5						0.02	1.2	1.2	1.7	2.1									2.9	130	16	10	19
D144725		USGS		Geochemistry of rock samples from the National Geochemical Database: U.S. Geological Survey, Reston, VA.	U.S. Geological Survey	USGS		39.8333	-111	0.01	18	18	18	UNKNOWN	SEDIMENTARY	UNKNOWN	UNKNOWN	MUDSTONE		54.1	0.65	14.2						0.06	4.9	5	0.57	2.4	0.21								3.1	600	35	13	54
D144726		USGS		Geochemistry of rock samples from the National Geochemical Database: U.S. Geological Survey, Reston, VA.	U.S. Geological Survey	USGS		41.2667	-110.833	0.01	18	18	18	UNKNOWN	SEDIMENTARY	UNKNOWN	UNKNOWN	MUDSTONE		48.6	0.37	7.6						0.04	1.8	18.1	0.03	1.5	0.32								1.3	370	23		22
D144727		USGS		Geochemistry of rock samples from the National Geochemical Database: U.S. Geological Survey, Reston, VA.	U.S. Geological Survey	USGS		43.35	-107.617	0.01	18	18	18	UNKNOWN	SEDIMENTARY	UNKNOWN	UNKNOWN	MUDSTONE		84.4	0.44	7.4						0.02	0.7	1.2	0.13	1.8	0.01								0.6	32	15		14
D144728		USGS		Geochemistry of rock samples from the National Geochemical Database: U.S. Geological Survey, Reston, VA.	U.S. Geological Survey	USGS		42.3667	-110.25	0.01	18	18	18	UNKNOWN	SEDIMENTARY	UNKNOWN	UNKNOWN	MUDSTONE		57.3	0.5	11.8						0.08	3.5	7.3	0.22	3.4	0.17								1.9	710	24	9	39
D144729		USGS		Geochemistry of rock samples from the National Geochemical Database: U.S. Geological Survey, Reston, VA.	U.S. Geological Survey	USGS		42.0667	-108.517	0.01	18	18	18	UNKNOWN	SEDIMENTARY	UNKNOWN	UNKNOWN	MUDSTONE		60.5	0.65	16						0.02	2.6	2.4	1.5	2.7	0.22								3	230	51	16	57
D144730		USGS		Geochemistry of rock samples from the National Geochemical Database: U.S. Geological Survey, Reston, VA.	U.S. Geological Survey	USGS		39.9333	-111.117	0.01	18	18	18	UNKNOWN	SEDIMENTARY	UNKNOWN	UNKNOWN	MUDSTONE		48.1	0.57	11.2						0.06	4.5	12.6	0.51	2	0.13								2.3	480	28	11	30
D144731		USGS		Geochemistry of rock samples from the National Geochemical Database: U.S. Geological Survey, Reston, VA.	U.S. Geological Survey	USGS		39.4333	-111.75	0.01	18	18	18	UNKNOWN	SEDIMENTARY	UNKNOWN	UNKNOWN	MUDSTONE		56.9	0.77	15.2						0.04	2.5	4.1	3.5	3.4	0.13								3.8	810	30	12	39
D144732		USGS		Geochemistry of rock samples from the National Geochemical Database: U.S. Geological Survey, Reston, VA.	U.S. Geological Survey	USGS		41.4	-109.367	0.01	18	18	18	UNKNOWN	SEDIMENTARY	UNKNOWN	UNKNOWN	MUDSTONE		61	0.61	12.5						0.12	2.3	4.8	2.8	2.9	0.23								3.1	730	32	11	37
D144733		USGS		Geochemistry of rock samples from the National Geochemical Database: U.S. Geological Survey, Reston, VA.	U.S. Geological Survey	USGS		40.6833	-108.6	0.01	18	18	18	UNKNOWN	SEDIMENTARY	UNKNOWN	UNKNOWN	MUDSTONE		83.2	0.52	8.6						0.02	0.45	1	0.32	1.5									0.82	41	18	8	23
D144734		USGS		Geochemistry of rock samples from the National Geochemical Database: U.S. Geological Survey, Reston, VA.	U.S. Geological Survey	USGS		41.2667	-110.833	0.01	18	18	18	UNKNOWN	SEDIMENTARY	UNKNOWN	UNKNOWN	MUDSTONE		58.3	0.56	11.3						0.02	2.5	9.6	0.13	2.2	0.33								1.6	180	30	12	30
D144735		USGS		Geochemistry of rock samples from the National Geochemical Database: U.S. Geological Survey, Reston, VA.	U.S. Geological Survey	USGS		42.25	-107.9	0.01	18	18	18	UNKNOWN	SEDIMENTARY	UNKNOWN	UNKNOWN	MUDSTONE		64.5	0.39	18.6						0.04	0.51	2.2	1	3.8	0.02								1	29			5
D144736		USGS		Geochemistry of rock samples from the National Geochemical Database: U.S. Geological Survey, Reston, VA.	U.S. Geological Survey	USGS		43.65	-106.217	0.01	18	18	18	UNKNOWN	SEDIMENTARY	UNKNOWN	UNKNOWN	MUDSTONE		58.8	0.72	19.9						0.02	1.5	1	0.1	2.4	0.04								1.5	75	30	13	39
D144737		USGS		Geochemistry of rock samples from the National Geochemical Database: U.S. Geological Survey, Reston, VA.	U.S. Geological Survey	USGS		42.2833	-108.867	0.01	18	18	18	UNKNOWN	SEDIMENTARY	UNKNOWN	UNKNOWN	MUDSTONE		63.2	0.66	15.7						0.07	2.4	1.6	3	2.7	0.06								4.9	810	65	18	39
D144738		USGS		Geochemistry of rock samples from the National Geochemical Database: U.S. Geological Survey, Reston, VA.	U.S. Geological Survey	USGS		41.2167	-107.767	0.01	18	18	18	UNKNOWN	SEDIMENTARY	UNKNOWN	UNKNOWN	MUDSTONE		59.6	0.68	16						0.04	2.1	2	1.2	2.8	0.17								2.7	200	30	11	36
D144739		USGS		Geochemistry of rock samples from the National Geochemical Database: U.S. Geological Survey, Reston, VA.	U.S. Geological Survey	USGS		42.35	-106.4	0.01	18	18	18	UNKNOWN	SEDIMENTARY	UNKNOWN	UNKNOWN	MUDSTONE		74.4	0.45	11.9						0.03	1.3	0.67	0.9	2.7	0.18								1.8	140	38	11	16
D144740		USGS		Geochemistry of rock samples from the National Geochemical Database: U.S. Geological Survey, Reston, VA.	U.S. Geological Survey	USGS		42.95	-107.217	0.01	18	18	18	UNKNOWN	SEDIMENTARY	UNKNOWN	UNKNOWN	MUDSTONE		59.5	0.54	13.4						0.03	2.4	3.1	2.1	2.5	0.12								2.1	180	25	10	26
D144741		USGS		Geochemistry of rock samples from the National Geochemical Database: U.S. Geological Survey, Reston, VA.	U.S. Geological Survey	USGS		43.9333	-108.867	0.01	18	18	18	UNKNOWN	SEDIMENTARY	UNKNOWN	UNKNOWN	MUDSTONE		64.4	0.67	16.7						0.05	1.1	1.3	0.18	2.1	0.12								2.2	170	24	10	36
D144742		USGS		Geochemistry of rock samples from the National Geochemical Database: U.S. Geological Survey, Reston, VA.	U.S. Geological Survey	USGS		41.2	-108.583	0.01	18	18	18	UNKNOWN	SEDIMENTARY	UNKNOWN	UNKNOWN	MUDSTONE		61.6	0.73	15.3						0.13	1.8	3.1	1.6	2.8	0.14								2.4	900	25	13	40
D144743		USGS		Geochemistry of rock samples from the National Geochemical Database: U.S. Geological Survey, Reston, VA.	U.S. Geological Survey	USGS		36.3833	-106.867	0.01	18	18	18	UNKNOWN	SEDIMENTARY	UNKNOWN	UNKNOWN	MUDSTONE		74.7	0.54	13.7						0.03	0.36	0.72	0.38	2.8	0.04								1.1	41	8		13
D144744		USGS		Geochemistry of rock samples from the National Geochemical Database: U.S. Geological Survey, Reston, VA.	U.S. Geological Survey	USGS		35.4167	-106.067	0.01	18	18	18	UNKNOWN	SEDIMENTARY	UNKNOWN	UNKNOWN	MUDSTONE		60.6	0.61	11.1						0.09	1.2	8.7	0.21	1.5	0.09								1	310	20	11	17
D144745		USGS		Geochemistry of rock samples from the National Geochemical Database: U.S. Geological Survey, Reston, VA.	U.S. Geological Survey	USGS		42.3667	-110.25	0.01	18	18	18	UNKNOWN	SEDIMENTARY	UNKNOWN	UNKNOWN	MUDSTONE		60.2	0.46	10.8						0.09	3.7	6.2	0.13	3.2	0.15								1.8	540	23	12	22
D144746		USGS		Geochemistry of rock samples from the National Geochemical Database: U.S. Geological Survey, Reston, VA.	U.S. Geological Survey	USGS		40.6833	-108.6	0.01	18	18	18	UNKNOWN	SEDIMENTARY	UNKNOWN	UNKNOWN	MUDSTONE		54.1	0.62	12.9						0.08	2.7	8.4	0.46	2.3	0.17								1.7	390	29	12	49
D144748		USGS		Geochemistry of rock samples from the National Geochemical Database: U.S. Geological Survey, Reston, VA.	U.S. Geological Survey	USGS		42.9667	-107.2	0.01	18	18	18	UNKNOWN	SEDIMENTARY	UNKNOWN	UNKNOWN	MUDSTONE		72	0.28	13.6						0.03	0.8	0.88	2.6	3.6	0.04								1.6	110	20		11
D144749		USGS		Geochemistry of rock samples from the National Geochemical Database: U.S. Geological Survey, Reston, VA.	U.S. Geological Survey	USGS		42.3	-107.867	0.01	18	18	18	UNKNOWN	SEDIMENTARY	UNKNOWN	UNKNOWN	MUDSTONE		72.4	0.31	15.7						0.03	0.25	0.42	2.8	4	0.03								0.88	30	7		5
D144750		USGS		Geochemistry of rock samples from the National Geochemical Database: U.S. Geological Survey, Reston, VA.	U.S. Geological Survey	USGS		42.3667	-110.25	0.01	18	18	18	UNKNOWN	SEDIMENTARY	UNKNOWN	UNKNOWN	MUDSTONE		61.1	0.39	8.7						0.11	2.5	9.5	0.51	2.2	0.14								1.4	650	17		24
D144751		USGS		Geochemistry of rock samples from the National Geochemical Database: U.S. Geological Survey, Reston, VA.	U.S. Geological Survey	USGS		43.3667	-107.533	0.01	18	18	18	UNKNOWN	SEDIMENTARY	UNKNOWN	UNKNOWN	MUDSTONE		80.8	0.39	6.6						0.04	0.6	2.1	0.18	2.3	0.04								1.3	69	15		9
D144752		USGS		Geochemistry of rock samples from the National Geochemical Database: U.S. Geological Survey, Reston, VA.	U.S. Geological Survey	USGS		38.8667	-111.75	0.01	18	18	18	UNKNOWN	SEDIMENTARY	UNKNOWN	UNKNOWN	MUDSTONE		64	0.43	8.4						0.05	2.8	7.9	0.38	2.4	0.09								1.3	220	14		14
D144753		USGS		Geochemistry of rock samples from the National Geochemical Database: U.S. Geological Survey, Reston, VA.	U.S. Geological Survey	USGS		42.3	-106.083	0.01	18	18	18	UNKNOWN	SEDIMENTARY	UNKNOWN	UNKNOWN	MUDSTONE		70.4	0.62	15.6						0.02	0.41	0.45	0.16	3.5	0.04								1	41	12		10
D144754		USGS		Geochemistry of rock samples from the National Geochemical Database: U.S. Geological Survey, Reston, VA.	U.S. Geological Survey	USGS		40.9167	-108.117	0.01	18	18	18	UNKNOWN	SEDIMENTARY	UNKNOWN	UNKNOWN	MUDSTONE		59.1	0.62	13.2						0.37	1.4	6.9	0.56	2.8	0.45								1.3	2900	20	10	24
D144755		USGS		Geochemistry of rock samples from the National Geochemical Database: U.S. Geological Survey, Reston, VA.	U.S. Geological Survey	USGS		40.8333	-107.267	0.01	18	18	18	UNKNOWN	SEDIMENTARY	UNKNOWN	UNKNOWN	MUDSTONE		65.2	0.73	18.2						0.02	0.8	0.72	0.12	1.9	0.06								1.2	71	15		22
D144756		USGS		Geochemistry of rock samples from the National Geochemical Database: U.S. Geological Survey, Reston, VA.	U.S. Geological Survey	USGS		38.8667	-111.75	0.01	18	18	18	UNKNOWN	SEDIMENTARY	UNKNOWN	UNKNOWN	MUDSTONE		50.8	0.54	12.6						0.07	4.1	8.1	0.25	2.7	0.18								1.6	270	21	10	24
D144757		USGS		Geochemistry of rock samples from the National Geochemical Database: U.S. Geological Survey, Reston, VA.	U.S. Geological Survey	USGS		41.0833	-112.383	0.01	18	18	18	UNKNOWN	SEDIMENTARY	UNKNOWN	UNKNOWN	MUDSTONE		54.8	0.41	11.1						0.11	4.4	7.2	1.4	4	0.18								2.3	700	20	10	27
D144759		USGS		Geochemistry of rock samples from the National Geochemical Database: U.S. Geological Survey, Reston, VA.	U.S. Geological Survey	USGS		39.4667	-110.283	0.01	18	18	18	UNKNOWN	SEDIMENTARY	UNKNOWN	UNKNOWN	MUDSTONE		45.8	0.49	8.8						0.11	2.7	16.6	2.1	1.9	0.18								1.5	730	16	8	12
D144760		USGS		Geochemistry of rock samples from the National Geochemical Database: U.S. Geological Survey, Reston, VA.	U.S. Geological Survey	USGS		39.2333	-108.15	0.01	18	18	18	UNKNOWN	SEDIMENTARY	UNKNOWN	UNKNOWN	MUDSTONE		69.4	0.73	14.4						0.04	0.85	0.46	1	2.6	0.04								2.1	82	18	11	18
D144761		USGS		Geochemistry of rock samples from the National Geochemical Database: U.S. Geological Survey, Reston, VA.	U.S. Geological Survey	USGS		36.7333	-107.267	0.01	18	18	18	UNKNOWN	SEDIMENTARY	UNKNOWN	UNKNOWN	MUDSTONE		54.9	0.86	17.6						0.11	2.1	1.8	0.77	2.9	0.14								3.3	550	30	15	45
D144762		USGS		Geochemistry of rock samples from the National Geochemical Database: U.S. Geological Survey, Reston, VA.	U.S. Geological Survey	USGS		43.2	-110.4	0.01	18	18	18	UNKNOWN	SEDIMENTARY	UNKNOWN	UNKNOWN	MUDSTONE		62	0.33	7.3						0.08	2.7	10.1	0.32	1.5	0.19								0.81	330	11		10
D144763		USGS		Geochemistry of rock samples from the National Geochemical Database: U.S. Geological Survey, Reston, VA.	U.S. Geological Survey	USGS		40.8833	-108.117	0.01	18	18	18	UNKNOWN	SEDIMENTARY	UNKNOWN	UNKNOWN	MUDSTONE		62.5	0.67	15.2						0.11	1.8	2.5	0.5	3	0.16								1.5	610	25	15	32
D144764		USGS		Geochemistry of rock samples from the National Geochemical Database: U.S. Geological Survey, Reston, VA.	U.S. Geological Survey	USGS		35.3167	-106.3	0.01	18	18	18	UNKNOWN	SEDIMENTARY	UNKNOWN	UNKNOWN	MUDSTONE		65.1	0.36	8.2						0.12	0.51	9.4	0.02	1.8	0.09								1.2	540	12		12
D144765		USGS		Geochemistry of rock samples from the National Geochemical Database: U.S. Geological Survey, Reston, VA.	U.S. Geological Survey	USGS		41.2667	-110.833	0.01	18	18	18	UNKNOWN	SEDIMENTARY	UNKNOWN	UNKNOWN	MUDSTONE		42.5	0.42	9.1						0.13	2.9	18.4	0.09	1.9	0.32								1.8	800	34	10	30
D144766		USGS		Geochemistry of rock samples from the National Geochemical Database: U.S. Geological Survey, Reston, VA.	U.S. Geological Survey	USGS		43.7833	-105.933	0.01	18	18	18	UNKNOWN	SEDIMENTARY	UNKNOWN	UNKNOWN	MUDSTONE		64.3	0.62	13.6						0.05	2.3	1.4	0.16	2.8	0.14								2.4	220	27	12	29
D144767		USGS		Geochemistry of rock samples from the National Geochemical Database: U.S. Geological Survey, Reston, VA.	U.S. Geological Survey	USGS		40.6833	-108.6	0.01	18	18	18	UNKNOWN	SEDIMENTARY	UNKNOWN	UNKNOWN	MUDSTONE		54.2	0.5	10						0.1	3.2	11.3	0.95	2	0.14								1.5	490	20	9	30
D144768		USGS		Geochemistry of rock samples from the National Geochemical Database: U.S. Geological Survey, Reston, VA.	U.S. Geological Survey	USGS		41.5167	-111.267	0.01	18	18	18	UNKNOWN	SEDIMENTARY	UNKNOWN	UNKNOWN	MUDSTONE		74.7	0.43	6.8						0.04	0.5	6.4	0.07	1.2	0.2								0.48	100	20	13	17
D144769		USGS		Geochemistry of rock samples from the National Geochemical Database: U.S. Geological Survey, Reston, VA.	U.S. Geological Survey	USGS		38.8667	-111.75	0.01	18	18	18	UNKNOWN	SEDIMENTARY	UNKNOWN	UNKNOWN	MUDSTONE		75.3	0.22	5.1						0.03	1.1	7.2		1.4	0.13								0.54	110	17	13	13
D144770		USGS		Geochemistry of rock samples from the National Geochemical Database: U.S. Geological Survey, Reston, VA.	U.S. Geological Survey	USGS		43.5333	-109.6	0.01	18	18	18	UNKNOWN	SEDIMENTARY	UNKNOWN	UNKNOWN	MUDSTONE		63	0.42	8.2						0.06	3.4	8.9	0.52	2.2	0.26								0.99	220	24	9	13
D144771		USGS		Geochemistry of rock samples from the National Geochemical Database: U.S. Geological Survey, Reston, VA.	U.S. Geological Survey	USGS		44.6333	-105.7	0.01	18	18	18	UNKNOWN	SEDIMENTARY	UNKNOWN	UNKNOWN	MUDSTONE		67.1	0.5	10.7						0.06	1.1	2.7	0.15	2.3	0.18								2.6	310	46	18	23
D144773		USGS		Geochemistry of rock samples from the National Geochemical Database: U.S. Geological Survey, Reston, VA.	U.S. Geological Survey	USGS		39.4167	-111.75	0.01	18	18	18	UNKNOWN	SEDIMENTARY	UNKNOWN	UNKNOWN	MUDSTONE		31.5	0.38	9.8						0.09	9.8	15.4	1.8	2.7	0.16								1.6	570	18	10	18
D144774		USGS		Geochemistry of rock samples from the National Geochemical Database: U.S. Geological Survey, Reston, VA.	U.S. Geological Survey	USGS		42.9667	-107.2	0.01	18	18	18	UNKNOWN	SEDIMENTARY	UNKNOWN	UNKNOWN	MUDSTONE		61.2	0.36	12.7						0.17	2.1	6.7	2.1	2.2	0.18								1.6	1200	18		14
D144775		USGS		Geochemistry of rock samples from the National Geochemical Database: U.S. Geological Survey, Reston, VA.	U.S. Geological Survey	USGS		37.3167	-104.983	0.01	18	18	18	UNKNOWN	SEDIMENTARY	UNKNOWN	UNKNOWN	MUDSTONE		65	0.6	15.7						0.11	2.2	1.1	1.7	4.8	0.16								3.3	800	19	10	22
D144776		USGS		Geochemistry of rock samples from the National Geochemical Database: U.S. Geological Survey, Reston, VA.	U.S. Geological Survey	USGS		41.7833	-105.317	0.01	18	18	18	UNKNOWN	SEDIMENTARY	UNKNOWN	UNKNOWN	MUDSTONE		71.6	0.54	12.5						0.02	1.7	1.5	0.51	2.5	0.18								2	170	18	9	21
D144777		USGS		Geochemistry of rock samples from the National Geochemical Database: U.S. Geological Survey, Reston, VA.	U.S. Geological Survey	USGS		41.0833	-112.383	0.01	18	18	18	UNKNOWN	SEDIMENTARY	UNKNOWN	UNKNOWN	MUDSTONE		54.5	0.41	11.2						0.12	4.4	7.3	1.6	4.1	0.19								2.4	700	22	11	26
D144778		USGS		Geochemistry of rock samples from the National Geochemical Database: U.S. Geological Survey, Reston, VA.	U.S. Geological Survey	USGS		37.3167	-104.95	0.01	18	18	18	UNKNOWN	SEDIMENTARY	UNKNOWN	UNKNOWN	MUDSTONE		54.8	0.99	18.9						0.12	3.2	1.8	0.88	4.6	0.21								5.5	800	39	20	74
D144779		USGS		Geochemistry of rock samples from the National Geochemical Database: U.S. Geological Survey, Reston, VA.	U.S. Geological Survey	USGS		35.4167	-106.067	0.01	18	18	18	UNKNOWN	SEDIMENTARY	UNKNOWN	UNKNOWN	MUDSTONE		56.2	0.67	15.2						0.06	2.2	5	0.4	3	0.16								3	190	23	11	27
D144780		USGS		Geochemistry of rock samples from the National Geochemical Database: U.S. Geological Survey, Reston, VA.	U.S. Geological Survey	USGS		41.0833	-112.383	0.01	18	18	18	UNKNOWN	SEDIMENTARY	UNKNOWN	UNKNOWN	MUDSTONE		54.8	0.42	11.2						0.11	4.4	7.3	1.9	4.1	0.19								2.3	800	20	10	27
D144781		USGS		Geochemistry of rock samples from the National Geochemical Database: U.S. Geological Survey, Reston, VA.	U.S. Geological Survey	USGS		39.4167	-111.767	0.01	18	18	18	UNKNOWN	SEDIMENTARY	UNKNOWN	UNKNOWN	MUDSTONE		55	0.69	14.6						0.08	2.8	5	4.1	3.6	0.15								3.6	780	26	12	36
D144782		USGS		Geochemistry of rock samples from the National Geochemical Database: U.S. Geological Survey, Reston, VA.	U.S. Geological Survey	USGS		41	-111.617	0.01	18	18	18	UNKNOWN	SEDIMENTARY	UNKNOWN	UNKNOWN	MUDSTONE		43.9	0.21	3.8						0.06	2.9	22.9	0.19	0.93	0.16								0.62	190	14		6
D144783		USGS		Geochemistry of rock samples from the National Geochemical Database: U.S. Geological Survey, Reston, VA.	U.S. Geological Survey	USGS		40.8833	-107.983	0.01	18	18	18	UNKNOWN	SEDIMENTARY	UNKNOWN	UNKNOWN	MUDSTONE		58.4	0.71	17						0.04	1.8	1.5	0.65	3	0.09								3	190	24	11	26
D144784		USGS		Geochemistry of rock samples from the National Geochemical Database: U.S. Geological Survey, Reston, VA.	U.S. Geological Survey	USGS		39.4667	-110.283	0.01	18	18	18	UNKNOWN	SEDIMENTARY	UNKNOWN	UNKNOWN	MUDSTONE		44.4	0.71	13.3						0.11	3.3	11.1	3.9	2.2	0.13								3.3	700	33	15	50
D144785		USGS		Geochemistry of rock samples from the National Geochemical Database: U.S. Geological Survey, Reston, VA.	U.S. Geological Survey	USGS		36.2167	-106.95	0.01	18	18	18	UNKNOWN	SEDIMENTARY	UNKNOWN	UNKNOWN	MUDSTONE		79.6	0.57	9.6							0.81	0.45	1	2.1	0.06								1.2	58	14	8	14
D144786		USGS		Geochemistry of rock samples from the National Geochemical Database: U.S. Geological Survey, Reston, VA.	U.S. Geological Survey	USGS		35.3167	-106.3	0.01	18	18	18	UNKNOWN	SEDIMENTARY	UNKNOWN	UNKNOWN	MUDSTONE		58.3	0.69	15.3						0.05	2.1	3.1	0.75	2.8	0.15								3.1	190	21	10	27
D144788		USGS		Geochemistry of rock samples from the National Geochemical Database: U.S. Geological Survey, Reston, VA.	U.S. Geological Survey	USGS		39.4667	-110.283	0.01	18	18	18	UNKNOWN	SEDIMENTARY	UNKNOWN	UNKNOWN	MUDSTONE		51.3	0.69	14.4						0.05	2.3	6.3	3.8	2.4	0.2								3.6	510	36	12	55
D144789		USGS		Geochemistry of rock samples from the National Geochemical Database: U.S. Geological Survey, Reston, VA.	U.S. Geological Survey	USGS		42.3	-106.067	0.01	18	18	18	UNKNOWN	SEDIMENTARY	UNKNOWN	UNKNOWN	MUDSTONE		69.4	0.73	16							0.49	0.52	0.59	4.2	0.04								1.5	88	12		10
D144790		USGS		Geochemistry of rock samples from the National Geochemical Database: U.S. Geological Survey, Reston, VA.	U.S. Geological Survey	USGS		37.3333	-104.983	0.01	18	18	18	UNKNOWN	SEDIMENTARY	UNKNOWN	UNKNOWN	MUDSTONE		73.2	0.39	12.7						0.04	0.87	1	1.5	3.9	0.09								2.2	310	12		30
D144791		USGS		Geochemistry of rock samples from the National Geochemical Database: U.S. Geological Survey, Reston, VA.	U.S. Geological Survey	USGS		36.2167	-106.95	0.01	18	18	18	UNKNOWN	SEDIMENTARY	UNKNOWN	UNKNOWN	MUDSTONE		83.7	0.48	6.8						0.02	0.6	1.1	0.31	1.5	0.04								0.69	110	11		14
D144792		USGS		Geochemistry of rock samples from the National Geochemical Database: U.S. Geological Survey, Reston, VA.	U.S. Geological Survey	USGS		41.0833	-112.383	0.01	18	18	18	UNKNOWN	SEDIMENTARY	UNKNOWN	UNKNOWN	MUDSTONE		54.7	0.42	11.4						0.08	4.4	7.1	1.4	4.1	0.18								2.4	700	22	10	26
D144793		USGS		Geochemistry of rock samples from the National Geochemical Database: U.S. Geological Survey, Reston, VA.	U.S. Geological Survey	USGS		38.8667	-111.75	0.01	18	18	18	UNKNOWN	SEDIMENTARY	UNKNOWN	UNKNOWN	MUDSTONE		73.7	0.21	3.7						0.05	1.4	8.8	0.02	1.3	0.11								0.64	170	9		12
D144794		USGS		Geochemistry of rock samples from the National Geochemical Database: U.S. Geological Survey, Reston, VA.	U.S. Geological Survey	USGS		42.2833	-108.867	0.01	18	18	18	UNKNOWN	SEDIMENTARY	UNKNOWN	UNKNOWN	MUDSTONE		59.9	0.68	16.4						0.07	2.6	1.8	2.6	3.1	0.38								4.6	490	91	23	62
D144795		USGS		Geochemistry of rock samples from the National Geochemical Database: U.S. Geological Survey, Reston, VA.	U.S. Geological Survey	USGS		41.0667	-107.683	0.01	18	18	18	UNKNOWN	SEDIMENTARY	UNKNOWN	UNKNOWN	MUDSTONE		57.6	0.78	20.1						0.03	1.5	0.44	0.93	2.5	0.14								2.8	60	23		29
D144796		USGS		Geochemistry of rock samples from the National Geochemical Database: U.S. Geological Survey, Reston, VA.	U.S. Geological Survey	USGS		41.8667	-108	0.01	18	18	18	UNKNOWN	SEDIMENTARY	UNKNOWN	UNKNOWN	MUDSTONE		71.4	0.5	10.9						0.05	2.2	2.7	0.9	2.6	0.16								1.8	280	24	11	20
D144798		USGS		Geochemistry of rock samples from the National Geochemical Database: U.S. Geological Survey, Reston, VA.	U.S. Geological Survey	USGS		37.7833	-105.267	0.01	18	18	18	UNKNOWN	SEDIMENTARY	UNKNOWN	UNKNOWN	MUDSTONE		64	0.07	18.6						0.04	0.66	0.59	0.21	3.1	0.09								2.3	150	32	14	39
D144799		USGS		Geochemistry of rock samples from the National Geochemical Database: U.S. Geological Survey, Reston, VA.	U.S. Geological Survey	USGS		38.8667	-111.75	0.01	18	18	18	UNKNOWN	SEDIMENTARY	UNKNOWN	UNKNOWN	MUDSTONE		64.8	0.4	6.4						0.07	2.3	9.4	0.32	1.8	0.08								0.8	250	12		14
D144800		USGS		Geochemistry of rock samples from the National Geochemical Database: U.S. Geological Survey, Reston, VA.	U.S. Geological Survey	USGS		42.3333	-106.4	0.01	18	18	18	UNKNOWN	SEDIMENTARY	UNKNOWN	UNKNOWN	MUDSTONE		60.6	0.89	17.1						0.03	1.7	0.9	0.48	3.2	0.08								2.6	81	21	11	29
D144801		USGS		Geochemistry of rock samples from the National Geochemical Database: U.S. Geological Survey, Reston, VA.	U.S. Geological Survey	USGS		37.8333	-105.267	0.01	18	18	18	UNKNOWN	SEDIMENTARY	UNKNOWN	UNKNOWN	MUDSTONE		66.1	0.66	14.7						0.07	1.2	1.3	1.8	3.4	0.26								2.7	370	25	12	30
D144802		USGS		Geochemistry of rock samples from the National Geochemical Database: U.S. Geological Survey, Reston, VA.	U.S. Geological Survey	USGS		43.2	-110.4	0.01	18	18	18	UNKNOWN	SEDIMENTARY	UNKNOWN	UNKNOWN	MUDSTONE		66.6	0.23	5						0.08	2.1	11	0.21	1	0.15								0.6	380	10		8
D144803		USGS		Geochemistry of rock samples from the National Geochemical Database: U.S. Geological Survey, Reston, VA.	U.S. Geological Survey	USGS		36.7167	-107.267	0.01	18	18	18	UNKNOWN	SEDIMENTARY	UNKNOWN	UNKNOWN	MUDSTONE		61.6	0.62	13.6						0.2	1.1	5.3	1.1	2.5	0.06								2.7	1700	28	13	26
D144804		USGS		Geochemistry of rock samples from the National Geochemical Database: U.S. Geological Survey, Reston, VA.	U.S. Geological Survey	USGS		40.6833	-108.6	0.01	18	18	18	UNKNOWN	SEDIMENTARY	UNKNOWN	UNKNOWN	MUDSTONE		52.9	0.64	13.6						0.07	3.3	8.2	0.52	2.3	0.16								2.4	310	32	15	54
D144805		USGS		Geochemistry of rock samples from the National Geochemical Database: U.S. Geological Survey, Reston, VA.	U.S. Geological Survey	USGS		43.5833	-109.6	0.01	18	18	18	UNKNOWN	SEDIMENTARY	UNKNOWN	UNKNOWN	MUDSTONE		68.3	0.45	11.1						0.04	2.5	2.7	0.94	2.2	0.1								1.7	180	25	10	20
D144806		USGS		Geochemistry of rock samples from the National Geochemical Database: U.S. Geological Survey, Reston, VA.	U.S. Geological Survey	USGS		44.2333	-106.417	0.01	18	18	18	UNKNOWN	SEDIMENTARY	UNKNOWN	UNKNOWN	MUDSTONE		62.7	0.61	15.9						0.06	1.9	1.4	0.64	3.6	0.15								2.7	460	30	15	34
D144807		USGS		Geochemistry of rock samples from the National Geochemical Database: U.S. Geological Survey, Reston, VA.	U.S. Geological Survey	USGS		40.8667	-107.467	0.01	18	18	18	UNKNOWN	SEDIMENTARY	UNKNOWN	UNKNOWN	MUDSTONE		61.7	0.61	14.4						0.03	1.3	3.9	0.14	1.7	0.08								1.7	88	24	15	23
D144808		USGS		Geochemistry of rock samples from the National Geochemical Database: U.S. Geological Survey, Reston, VA.	U.S. Geological Survey	USGS		44.0667	-108.7	0.01	18	18	18	UNKNOWN	SEDIMENTARY	UNKNOWN	UNKNOWN	MUDSTONE		80.2	0.47	10.4						0.03	0.5	0.79	0.08	1.2	0.02								0.6	17	13	8	14
D144809		USGS		Geochemistry of rock samples from the National Geochemical Database: U.S. Geological Survey, Reston, VA.	U.S. Geological Survey	USGS		43.9333	-108.867	0.01	18	18	18	UNKNOWN	SEDIMENTARY	UNKNOWN	UNKNOWN	MUDSTONE		65.9	0.57	16.1						0.02	0.93	0.99	0.19	2.5	0.1								4.4	90	32		28
D144810		USGS		Geochemistry of rock samples from the National Geochemical Database: U.S. Geological Survey, Reston, VA.	U.S. Geological Survey	USGS		41.4167	-109.367	0.01	18	18	18	UNKNOWN	SEDIMENTARY	UNKNOWN	UNKNOWN	MUDSTONE		59.8	0.59	14.8						0.07	3.1	3.3	1.5	3.7	0.17								2.5	480	27	12	36
D144811		USGS		Geochemistry of rock samples from the National Geochemical Database: U.S. Geological Survey, Reston, VA.	U.S. Geological Survey	USGS		43.2	-110.4	0.01	18	18	18	UNKNOWN	SEDIMENTARY	UNKNOWN	UNKNOWN	MUDSTONE		71.2	0.26	5.8						0.04	2.1	8.2	0.2	1	0.16								0.72	200	12		8
D144812		USGS		Geochemistry of rock samples from the National Geochemical Database: U.S. Geological Survey, Reston, VA.	U.S. Geological Survey	USGS		42.3333	-106.4	0.01	18	18	18	UNKNOWN	SEDIMENTARY	UNKNOWN	UNKNOWN	MUDSTONE		66.3	0.64	14.5						0.03	1.7	0.92	0.9	2.9	0.04								2.1	110	24	11	17
D144813		USGS		Geochemistry of rock samples from the National Geochemical Database: U.S. Geological Survey, Reston, VA.	U.S. Geological Survey	USGS		41.7667	-105.333	0.01	18	18	18	UNKNOWN	SEDIMENTARY	UNKNOWN	UNKNOWN	MUDSTONE		68.4	0.56	13.8						0.05	1.6	0.72	0.6	3.1	0.16								2.6	260	30	10	28
D144815		USGS		Geochemistry of rock samples from the National Geochemical Database: U.S. Geological Survey, Reston, VA.	U.S. Geological Survey	USGS		37.3167	-104.983	0.01	18	18	18	UNKNOWN	SEDIMENTARY	UNKNOWN	UNKNOWN	MUDSTONE		70.9	0.51	13.8						0.08	1.5	1.2	1.7	3.3	0.11								2.6	690	22	13	34
D144816		USGS		Geochemistry of rock samples from the National Geochemical Database: U.S. Geological Survey, Reston, VA.	U.S. Geological Survey	USGS		42.2833	-108.867	0.01	18	18	18	UNKNOWN	SEDIMENTARY	UNKNOWN	UNKNOWN	MUDSTONE		62.4	0.5	13.7						0.47	1.9	5.2	3.4	2.2	0.15								1.9	5400	60	21	48
D144817		USGS		Geochemistry of rock samples from the National Geochemical Database: U.S. Geological Survey, Reston, VA.	U.S. Geological Survey	USGS		42.3333	-106.4	0.01	18	18	18	UNKNOWN	SEDIMENTARY	UNKNOWN	UNKNOWN	MUDSTONE		68.1	0.51	14.2						0.03	1.2	0.98	1.2	3.2	0.04								1.8	100	27	14	14
D144818		USGS		Geochemistry of rock samples from the National Geochemical Database: U.S. Geological Survey, Reston, VA.	U.S. Geological Survey	USGS		41.8667	-110.767	0.01	18	18	18	UNKNOWN	SEDIMENTARY	UNKNOWN	UNKNOWN	MUDSTONE		62.2	0.45	13.7						0.09	1.8	4.5	0.29	2.7	0.29								1.5	460	20	8	24
D144819		USGS		Geochemistry of rock samples from the National Geochemical Database: U.S. Geological Survey, Reston, VA.	U.S. Geological Survey	USGS		41.4	-109.367	0.01	18	18	18	UNKNOWN	SEDIMENTARY	UNKNOWN	UNKNOWN	MUDSTONE		72.8	0.38	9.4						0.07	1.5	3.7	1.5	2.6	0.14								1.4	420	19	8	21
D144820		USGS		Geochemistry of rock samples from the National Geochemical Database: U.S. Geological Survey, Reston, VA.	U.S. Geological Survey	USGS		35.3167	-106.3	0.01	18	18	18	UNKNOWN	SEDIMENTARY	UNKNOWN	UNKNOWN	MUDSTONE		60	0.5	8.5						0.07	1.1	11.3	0.25	1.6	0.07								1.5	400	15	8	12
D144821		USGS		Geochemistry of rock samples from the National Geochemical Database: U.S. Geological Survey, Reston, VA.	U.S. Geological Survey	USGS		39.4667	-110.283	0.01	18	18	18	UNKNOWN	SEDIMENTARY	UNKNOWN	UNKNOWN	MUDSTONE		48.4	0.68	12.9						0.09	3.8	8.2	3.1	2.4	0.19								2.9	650	28	10	34
D144822		USGS		Geochemistry of rock samples from the National Geochemical Database: U.S. Geological Survey, Reston, VA.	U.S. Geological Survey	USGS		44.0667	-108.7	0.01	18	18	18	UNKNOWN	SEDIMENTARY	UNKNOWN	UNKNOWN	MUDSTONE		61.6	1.2	17.2						0.03	1.4	0.4	0.46	2.5	0.37								3.7	85	27	8	34
D144823		USGS		Geochemistry of rock samples from the National Geochemical Database: U.S. Geological Survey, Reston, VA.	U.S. Geological Survey	USGS		35.4167	-106.067	0.01	18	18	18	UNKNOWN	SEDIMENTARY	UNKNOWN	UNKNOWN	MUDSTONE		62.7	0.66	16.7						0.03	1.3	1.6	0.18	1.3	0.1								1.9	76	21	10	33
D144824		USGS		Geochemistry of rock samples from the National Geochemical Database: U.S. Geological Survey, Reston, VA.	U.S. Geological Survey	USGS		43.65	-106.217	0.01	18	18	18	UNKNOWN	SEDIMENTARY	UNKNOWN	UNKNOWN	MUDSTONE		72.4	0.68	14.4						0.02	0.75	0.3	0.35	2.1	0.03								1.8	47	15		29
D144825		USGS		Geochemistry of rock samples from the National Geochemical Database: U.S. Geological Survey, Reston, VA.	U.S. Geological Survey	USGS		43.3667	-107.533	0.01	18	18	18	UNKNOWN	SEDIMENTARY	UNKNOWN	UNKNOWN	MUDSTONE		73.2	0.51	8.4						0.03	1.9	3.1	0.3	3.1	0.14								1.5	120	24	10	15
D144827		USGS		Geochemistry of rock samples from the National Geochemical Database: U.S. Geological Survey, Reston, VA.	U.S. Geological Survey	USGS		41.8667	-110.767	0.01	18	18	18	UNKNOWN	SEDIMENTARY	UNKNOWN	UNKNOWN	MUDSTONE		62.5	0.5	12.4						0.11	2.8	4	0.18	2.2	0.15								1.7	500	21	9	27
D144828		USGS		Geochemistry of rock samples from the National Geochemical Database: U.S. Geological Survey, Reston, VA.	U.S. Geological Survey	USGS		36.05	-107.017	0.01	18	18	18	UNKNOWN	SEDIMENTARY	UNKNOWN	UNKNOWN	MUDSTONE		57	0.72	18.3						0.04	1.5	1.2	0.28	2.1	0.13								4.1	160	21	12	26
D144829		USGS		Geochemistry of rock samples from the National Geochemical Database: U.S. Geological Survey, Reston, VA.	U.S. Geological Survey	USGS		42.3667	-110.25	0.01	18	18	18	UNKNOWN	SEDIMENTARY	UNKNOWN	UNKNOWN	MUDSTONE		67.4	0.53	10.4						0.1	2.7	3.2	0.64	2.7	0.21								3.1	580	25	9	23
D144830		USGS		Geochemistry of rock samples from the National Geochemical Database: U.S. Geological Survey, Reston, VA.	U.S. Geological Survey	USGS		39.2333	-108.15	0.01	18	18	18	UNKNOWN	SEDIMENTARY	UNKNOWN	UNKNOWN	MUDSTONE		63.9	0.89	18.8						0.03	0.5	0.5	0.66	0.29	0.04								2.5	44	10		20
D144831		USGS		Geochemistry of rock samples from the National Geochemical Database: U.S. Geological Survey, Reston, VA.	U.S. Geological Survey	USGS		41.5167	-111.267	0.01	18	18	18	UNKNOWN	SEDIMENTARY	UNKNOWN	UNKNOWN	MUDSTONE		43.3	0.57	11.7						0.07	0.68	16.6	0.12	1.1	0.19								1.5	200	14		30
D144832		USGS		Geochemistry of rock samples from the National Geochemical Database: U.S. Geological Survey, Reston, VA.	U.S. Geological Survey	USGS		36.7333	-107.267	0.01	18	18	18	UNKNOWN	SEDIMENTARY	UNKNOWN	UNKNOWN	MUDSTONE		56.5	0.93	18.1						0.07	2.1	0.68	1.2	3	0.18								5.7	480	29	17	63
D144833		USGS		Geochemistry of rock samples from the National Geochemical Database: U.S. Geological Survey, Reston, VA.	U.S. Geological Survey	USGS		40.6833	-108.6	0.01	18	18	18	UNKNOWN	SEDIMENTARY	UNKNOWN	UNKNOWN	MUDSTONE		67.5	0.79	16.1						0.02	1.3	0.75	0.34	2.5	0.04								1.3	72	15		40
D144834		USGS		Geochemistry of rock samples from the National Geochemical Database: U.S. Geological Survey, Reston, VA.	U.S. Geological Survey	USGS		41.0833	-112.383	0.01	18	18	18	UNKNOWN	SEDIMENTARY	UNKNOWN	UNKNOWN	MUDSTONE		55.3	0.45	11.4						0.1	4.4	7.1	1.5	4	0.17								3.4	800	20	10	25
D144835		USGS		Geochemistry of rock samples from the National Geochemical Database: U.S. Geological Survey, Reston, VA.	U.S. Geological Survey	USGS		42.2833	-108.867	0.01	18	18	18	UNKNOWN	SEDIMENTARY	UNKNOWN	UNKNOWN	MUDSTONE		66	0.62	15.1						0.07	2	2	3.4	2.6	0.18								4.9	540	60	15	36
D144836		USGS		Geochemistry of rock samples from the National Geochemical Database: U.S. Geological Survey, Reston, VA.	U.S. Geological Survey	USGS		36.7333	-107.25	0.01	18	18	18	UNKNOWN	SEDIMENTARY	UNKNOWN	UNKNOWN	MUDSTONE		70.2	0.74	13.4						0.05	1.3	0.82	1.3	3	0.1								2.5	290	20	11	26
D144837		USGS		Geochemistry of rock samples from the National Geochemical Database: U.S. Geological Survey, Reston, VA.	U.S. Geological Survey	USGS		43.55	-109.6	0.01	18	18	18	UNKNOWN	SEDIMENTARY	UNKNOWN	UNKNOWN	MUDSTONE		59.7	0.39	8.5							4.7	8.3	0.71	2.1	0.08								1.3	150	41	9	16
D144838		USGS		Geochemistry of rock samples from the National Geochemical Database: U.S. Geological Survey, Reston, VA.	U.S. Geological Survey	USGS		41.0833	-112.383	0.01	18	18	18	UNKNOWN	SEDIMENTARY	UNKNOWN	UNKNOWN	MUDSTONE		55.3	0.44	11.2						0.08	4.3	7.2	1.4	4.1	0.16								3.3	800	20	10	27
D144840		USGS		Geochemistry of rock samples from the National Geochemical Database: U.S. Geological Survey, Reston, VA.	U.S. Geological Survey	USGS		41.4167	-109.367	0.01	18	18	18	UNKNOWN	SEDIMENTARY	UNKNOWN	UNKNOWN	MUDSTONE		62.2	0.59	14.4						0.03	2.9	1.8	1	3.8	0.19								4.5	360	38	15	45
D144841		USGS		Geochemistry of rock samples from the National Geochemical Database: U.S. Geological Survey, Reston, VA.	U.S. Geological Survey	USGS		41	-111.617	0.01	18	18	18	UNKNOWN	SEDIMENTARY	UNKNOWN	UNKNOWN	MUDSTONE		33.1	0.27	5.3						0.03	1.9	30.1	0.11	0.82	0.09								0.8	190	17		6
D144842		USGS		Geochemistry of rock samples from the National Geochemical Database: U.S. Geological Survey, Reston, VA.	U.S. Geological Survey	USGS		41.0667	-107.683	0.01	18	18	18	UNKNOWN	SEDIMENTARY	UNKNOWN	UNKNOWN	MUDSTONE		66.7	0.68	15.7							1.1	0.42	0.7	2.4	0.05								3.1	64	26		27
D144843		USGS		Geochemistry of rock samples from the National Geochemical Database: U.S. Geological Survey, Reston, VA.	U.S. Geological Survey	USGS		39.4667	-110.283	0.01	18	18	18	UNKNOWN	SEDIMENTARY	UNKNOWN	UNKNOWN	MUDSTONE		47	0.69	12.6						0.11	3.6	10.4	2.9	2.1	0.23								3	1000	27	11	45
D144844		USGS		Geochemistry of rock samples from the National Geochemical Database: U.S. Geological Survey, Reston, VA.	U.S. Geological Survey	USGS		40.8333	-107.267	0.01	18	18	18	UNKNOWN	SEDIMENTARY	UNKNOWN	UNKNOWN	MUDSTONE		64.7	0.64	14.8						0.12	0.71	3	0.12	1.6									2.4	550	21	9	24
D144845		USGS		Geochemistry of rock samples from the National Geochemical Database: U.S. Geological Survey, Reston, VA.	U.S. Geological Survey	USGS		43.15	-110.333	0.01	18	18	18	UNKNOWN	SEDIMENTARY	UNKNOWN	UNKNOWN	MUDSTONE		52.8	0.56	14						0.03	2.8	8.9	0.2	2.8	0.09								2.2	240	20	9	22
D144846		USGS		Geochemistry of rock samples from the National Geochemical Database: U.S. Geological Survey, Reston, VA.	U.S. Geological Survey	USGS		40.8667	-107.467	0.01	18	18	18	UNKNOWN	SEDIMENTARY	UNKNOWN	UNKNOWN	MUDSTONE		77.3	0.49	9.7						0.04	0.93	0.82	0.42	2	0.03								2	270	20		18
D144847		USGS		Geochemistry of rock samples from the National Geochemical Database: U.S. Geological Survey, Reston, VA.	U.S. Geological Survey	USGS		43.15	-110.333	0.01	18	18	18	UNKNOWN	SEDIMENTARY	UNKNOWN	UNKNOWN	MUDSTONE		61	0.37	7.6						0.06	2	10.8	0.34	1.6	0.09								0.98	420	12		11
D144848		USGS		Geochemistry of rock samples from the National Geochemical Database: U.S. Geological Survey, Reston, VA.	U.S. Geological Survey	USGS		41.2667	-110.817	0.01	18	18	18	UNKNOWN	SEDIMENTARY	UNKNOWN	UNKNOWN	MUDSTONE		56.1	0.39	6.2						0.05	3.2	13.4	0.13	1.6	0.14								0.9	280	15		16
D144849		USGS		Geochemistry of rock samples from the National Geochemical Database: U.S. Geological Survey, Reston, VA.	U.S. Geological Survey	USGS		44.0667	-108.7	0.01	18	18	18	UNKNOWN	SEDIMENTARY	UNKNOWN	UNKNOWN	MUDSTONE		67	0.68	17.2							0.96	0.63	0.13	2.1	0.07								1.8	37	16		28
D144850		USGS		Geochemistry of rock samples from the National Geochemical Database: U.S. Geological Survey, Reston, VA.	U.S. Geological Survey	USGS		35.4167	-106.067	0.01	18	18	18	UNKNOWN	SEDIMENTARY	UNKNOWN	UNKNOWN	MUDSTONE		81.6	0.4	7.3						0.02	0.36	2.2	0.11	1.6									1.3	120	10		12
D144851		USGS		Geochemistry of rock samples from the National Geochemical Database: U.S. Geological Survey, Reston, VA.	U.S. Geological Survey	USGS		41.2167	-107.767	0.01	18	18	18	UNKNOWN	SEDIMENTARY	UNKNOWN	UNKNOWN	MUDSTONE		64.7	0.62	12.8						0.06	1.9	3.6	1.3	2.3	0.09								2.2	550	30	12	35
D144852		USGS		Geochemistry of rock samples from the National Geochemical Database: U.S. Geological Survey, Reston, VA.	U.S. Geological Survey	USGS		38.8667	-111.75	0.01	18	18	18	UNKNOWN	SEDIMENTARY	UNKNOWN	UNKNOWN	MUDSTONE		61.5	0.43	9.6						0.03	3.1	6.6	0.31	2.3	0.06								1.8	330	15	8	25
D144853		USGS		Geochemistry of rock samples from the National Geochemical Database: U.S. Geological Survey, Reston, VA.	U.S. Geological Survey	USGS		43.9333	-108.867	0.01	18	18	18	UNKNOWN	SEDIMENTARY	UNKNOWN	UNKNOWN	MUDSTONE		74.5	0.71	12.4						0.03	0.77	1	0.13	2.5	0.11								1.9	260	53	26	23
D144855		USGS		Geochemistry of rock samples from the National Geochemical Database: U.S. Geological Survey, Reston, VA.	U.S. Geological Survey	USGS		39.8333	-111	0.01	18	18	18	UNKNOWN	SEDIMENTARY	UNKNOWN	UNKNOWN	MUDSTONE		52.4	0.68	13.4						0.09	4.6	6.6	0.58	2.3	0.08								3.8	800	29	13	39
D144856		USGS		Geochemistry of rock samples from the National Geochemical Database: U.S. Geological Survey, Reston, VA.	U.S. Geological Survey	USGS		42.0333	-106.45	0.01	18	18	18	UNKNOWN	SEDIMENTARY	UNKNOWN	UNKNOWN	MUDSTONE		66.1	0.62	10.9						0.08	1.3	1.7	0.79	1.7	0.13								4.3	590	36	11	24
D144857		USGS		Geochemistry of rock samples from the National Geochemical Database: U.S. Geological Survey, Reston, VA.	U.S. Geological Survey	USGS		35.3167	-106.3	0.01	18	18	18	UNKNOWN	SEDIMENTARY	UNKNOWN	UNKNOWN	MUDSTONE		56	0.69	17.7							1.7	3.9	0.24	2.4	0.05								2.6	200	22	10	24
D144858		USGS		Geochemistry of rock samples from the National Geochemical Database: U.S. Geological Survey, Reston, VA.	U.S. Geological Survey	USGS		41	-111.617	0.01	18	18	18	UNKNOWN	SEDIMENTARY	UNKNOWN	UNKNOWN	MUDSTONE		62.6	0.22	4.3						0.03	2.2	14	0.1	0.88	0.15								0.58	170	12	9	11
D144859		USGS		Geochemistry of rock samples from the National Geochemical Database: U.S. Geological Survey, Reston, VA.	U.S. Geological Survey	USGS		41	-111.633	0.01	18	18	18	UNKNOWN	SEDIMENTARY	UNKNOWN	UNKNOWN	MUDSTONE		25.5	0.21	4.2						0.05	2.3	34.4	0.1	0.69	0.05								0.6	500	11	8	6
D144860		USGS		Geochemistry of rock samples from the National Geochemical Database: U.S. Geological Survey, Reston, VA.	U.S. Geological Survey	USGS		42.9667	-107.2	0.01	18	18	18	UNKNOWN	SEDIMENTARY	UNKNOWN	UNKNOWN	MUDSTONE		59.8	0.54	15.2						0.03	3	1.6	1.8	3.1	0.05								2.8	320	34	22	47
D144861		USGS		Geochemistry of rock samples from the National Geochemical Database: U.S. Geological Survey, Reston, VA.	U.S. Geological Survey	USGS		35.3167	-106.3	0.01	18	18	18	UNKNOWN	SEDIMENTARY	UNKNOWN	UNKNOWN	MUDSTONE		69	0.59	13.4							1.5	1.1	0.6	2									2.3	73	21	10	26
D144862		USGS		Geochemistry of rock samples from the National Geochemical Database: U.S. Geological Survey, Reston, VA.	U.S. Geological Survey	USGS		39.2333	-108.15	0.01	18	18	18	UNKNOWN	SEDIMENTARY	UNKNOWN	UNKNOWN	MUDSTONE		64.9	0.8	16						0.05	1.6	0.53	1.6	2.2	0.04								4.1	380	24	14	19
D144863		USGS		Geochemistry of rock samples from the National Geochemical Database: U.S. Geological Survey, Reston, VA.	U.S. Geological Survey	USGS		41.0667	-107.683	0.01	18	18	18	UNKNOWN	SEDIMENTARY	UNKNOWN	UNKNOWN	MUDSTONE		78.3	0.53	10.4							0.77	0.23	0.5	1.9									1.6	38	12		16
D144864		USGS		Geochemistry of rock samples from the National Geochemical Database: U.S. Geological Survey, Reston, VA.	U.S. Geological Survey	USGS		43.2	-110.4	0.01	18	18	18	UNKNOWN	SEDIMENTARY	UNKNOWN	UNKNOWN	MUDSTONE		49	0.39	7.9						0.02	2.6	17.1	0.22	1.8	0.05								0.93	900	13		9
D144865		USGS		Geochemistry of rock samples from the National Geochemical Database: U.S. Geological Survey, Reston, VA.	U.S. Geological Survey	USGS		41.2	-108.583	0.01	18	18	18	UNKNOWN	SEDIMENTARY	UNKNOWN	UNKNOWN	MUDSTONE		56.2	0.77	18.6						0.04	2.4	1.3	0.82	2.8	0.11								3.2	380	25	12	40
D144866		USGS		Geochemistry of rock samples from the National Geochemical Database: U.S. Geological Survey, Reston, VA.	U.S. Geological Survey	USGS		37.8333	-105.267	0.01	18	18	18	UNKNOWN	SEDIMENTARY	UNKNOWN	UNKNOWN	MUDSTONE		63.4	0.68	15.7						0.03	1.6	1.4	1.5	3.3	0.24								4.1	550	40	21	50
D144868		USGS		Geochemistry of rock samples from the National Geochemical Database: U.S. Geological Survey, Reston, VA.	U.S. Geological Survey	USGS		41.85	-110.767	0.01	18	18	18	UNKNOWN	SEDIMENTARY	UNKNOWN	UNKNOWN	MUDSTONE		62.3	0.51	11.1						0.07	2.4	6.6	0.24	2.3	0.24								1.6	440	16	8	24
D144869		USGS		Geochemistry of rock samples from the National Geochemical Database: U.S. Geological Survey, Reston, VA.	U.S. Geological Survey	USGS		41	-111.633	0.01	18	18	18	UNKNOWN	SEDIMENTARY	UNKNOWN	UNKNOWN	MUDSTONE		33.4	0.25	3.1						0.03	1.9	31.4	0.04	0.6	0.04								0.47	190	10		5
D144870		USGS		Geochemistry of rock samples from the National Geochemical Database: U.S. Geological Survey, Reston, VA.	U.S. Geological Survey	USGS		35.3167	-106.3	0.01	18	18	18	UNKNOWN	SEDIMENTARY	UNKNOWN	UNKNOWN	MUDSTONE		62.1	0.81	17.4						0.02	1.1	2.7	0.14	2.4	0.05								2.3	160	20	11	29
D148940		USGS		Geochemistry of rock samples from the National Geochemical Database: U.S. Geological Survey, Reston, VA.	U.S. Geological Survey	USGS		37.6	-105.033	0.01	18	18	18	UNKNOWN	SEDIMENTARY	UNKNOWN	UNKNOWN	MUDSTONE																							3	300	10	7	20
D148946		USGS		Geochemistry of rock samples from the National Geochemical Database: U.S. Geological Survey, Reston, VA.	U.S. Geological Survey	USGS		37.6167	-105.033	0.01	18	18	18	UNKNOWN	SEDIMENTARY	UNKNOWN	UNKNOWN	MUDSTONE																							3	700	15	10	20
D148949		USGS		Geochemistry of rock samples from the National Geochemical Database: U.S. Geological Survey, Reston, VA.	U.S. Geological Survey	USGS		37.5667	-105.083	0.01	18	18	18	UNKNOWN	SEDIMENTARY	UNKNOWN	UNKNOWN	MUDSTONE																							1.5	1000	7	5	7
D148953		USGS		Geochemistry of rock samples from the National Geochemical Database: U.S. Geological Survey, Reston, VA.	U.S. Geological Survey	USGS		37.5833	-105.067	0.01	18	18	18	UNKNOWN	SEDIMENTARY	UNKNOWN	UNKNOWN	MUDSTONE																							3	1000	7	7	10
D148962		USGS		Geochemistry of rock samples from the National Geochemical Database: U.S. Geological Survey, Reston, VA.	U.S. Geological Survey	USGS		37.6	-105.067	0.01	18	18	18	UNKNOWN	SEDIMENTARY	UNKNOWN	UNKNOWN	MUDSTONE																							3	200	7	5	7
D148996		USGS		Geochemistry of rock samples from the National Geochemical Database: U.S. Geological Survey, Reston, VA.	U.S. Geological Survey	USGS		37.6	-105.1	0.01	18	18	18	UNKNOWN	SEDIMENTARY	UNKNOWN	UNKNOWN	MUDSTONE																							3	1000	10	10	7
D154287		USGS		Geochemistry of rock samples from the National Geochemical Database: U.S. Geological Survey, Reston, VA.	U.S. Geological Survey	USGS		42.2833	-108.867	0.01	18	18	18	UNKNOWN	SEDIMENTARY	UNKNOWN	UNKNOWN	MUDSTONE																							1	150	15	7	15
D154288		USGS		Geochemistry of rock samples from the National Geochemical Database: U.S. Geological Survey, Reston, VA.	U.S. Geological Survey	USGS		42.2833	-108.867	0.01	18	18	18	UNKNOWN	SEDIMENTARY	UNKNOWN	UNKNOWN	MUDSTONE																							5	300	70	15	50
D154304		USGS		Geochemistry of rock samples from the National Geochemical Database: U.S. Geological Survey, Reston, VA.	U.S. Geological Survey	USGS		40.0667	-108.6	0.01	18	18	18	UNKNOWN	SEDIMENTARY	UNKNOWN	UNKNOWN	MUDSTONE																							5	150	10	7	70
D154305		USGS		Geochemistry of rock samples from the National Geochemical Database: U.S. Geological Survey, Reston, VA.	U.S. Geological Survey	USGS		40.0667	-108.6	0.01	18	18	18	UNKNOWN	SEDIMENTARY	UNKNOWN	UNKNOWN	MUDSTONE																							5	150	20	10	70
D154312		USGS		Geochemistry of rock samples from the National Geochemical Database: U.S. Geological Survey, Reston, VA.	U.S. Geological Survey	USGS		39.4667	-110.033	0.01	18	18	18	UNKNOWN	SEDIMENTARY	UNKNOWN	UNKNOWN	MUDSTONE																							1	1000	5	3	30
D154313		USGS		Geochemistry of rock samples from the National Geochemical Database: U.S. Geological Survey, Reston, VA.	U.S. Geological Survey	USGS		39.4667	-110.033	0.01	18	18	18	UNKNOWN	SEDIMENTARY	UNKNOWN	UNKNOWN	MUDSTONE																							3	500	15	5	100
D154316		USGS		Geochemistry of rock samples from the National Geochemical Database: U.S. Geological Survey, Reston, VA.	U.S. Geological Survey	USGS		43.4833	-109.483	0.01	18	18	18	UNKNOWN	SEDIMENTARY	UNKNOWN	UNKNOWN	MUDSTONE																							1	200	10	3	15
D154317		USGS		Geochemistry of rock samples from the National Geochemical Database: U.S. Geological Survey, Reston, VA.	U.S. Geological Survey	USGS		43.4833	-109.483	0.01	18	18	18	UNKNOWN	SEDIMENTARY	UNKNOWN	UNKNOWN	MUDSTONE																							1.5	200	10	3	15
D154322		USGS		Geochemistry of rock samples from the National Geochemical Database: U.S. Geological Survey, Reston, VA.	U.S. Geological Survey	USGS		43.4833	-109.483	0.01	18	18	18	UNKNOWN	SEDIMENTARY	UNKNOWN	UNKNOWN	MUDSTONE																							1	200	10	5	15
D154730		USGS		Geochemistry of rock samples from the National Geochemical Database: U.S. Geological Survey, Reston, VA.	U.S. Geological Survey	USGS		40.2667	-116.867	0.01	55	55	55	UNKNOWN	SEDIMENTARY	UNKNOWN	UNKNOWN	MUDSTONE																							1.5	20			20
D155181		USGS		Geochemistry of rock samples from the National Geochemical Database: U.S. Geological Survey, Reston, VA.	U.S. Geological Survey	USGS		38.4806	-117.201	0.01	59	59	59	UNKNOWN	SEDIMENTARY	UNKNOWN	UNKNOWN	MUDSTONE		78.5	0.89	11.7		2.1		0.28		0.1	0.48	0.53	0.02	0.92	0.24								0.7	50	30	3	70
D155197		USGS		Geochemistry of rock samples from the National Geochemical Database: U.S. Geological Survey, Reston, VA.	U.S. Geological Survey	USGS		38.1519	-118.082	0.01	59	59	59	UNKNOWN	SEDIMENTARY	UNKNOWN	UNKNOWN	MUDSTONE		64.7	0.68	14.6		1.3		4.8		0.07	4.1	0.72	0.02	4	0.35								5	300	20	15	70
D155548		USGS		Geochemistry of rock samples from the National Geochemical Database: U.S. Geological Survey, Reston, VA.	U.S. Geological Survey	USGS		28.375	-98	0.01	11	11	11	UNKNOWN	SEDIMENTARY	UNKNOWN	UNKNOWN	MUDSTONE																						10	5	700			70
D156493		USGS		Geochemistry of rock samples from the National Geochemical Database: U.S. Geological Survey, Reston, VA.	U.S. Geological Survey	USGS		28.375	-98.5	0.01	18	18	18	UNKNOWN	SEDIMENTARY	UNKNOWN	UNKNOWN	MUDSTONE																							0.2	7			7
D156498		USGS		Geochemistry of rock samples from the National Geochemical Database: U.S. Geological Survey, Reston, VA.	U.S. Geological Survey	USGS		28.375	-98.5	0.01	18	18	18	UNKNOWN	SEDIMENTARY	UNKNOWN	UNKNOWN	MUDSTONE																							0.5	70			5
D156501		USGS		Geochemistry of rock samples from the National Geochemical Database: U.S. Geological Survey, Reston, VA.	U.S. Geological Survey	USGS		28.375	-98.5	0.01	18	18	18	UNKNOWN	SEDIMENTARY	UNKNOWN	UNKNOWN	MUDSTONE																							1.5	70			7
D156533		USGS		Geochemistry of rock samples from the National Geochemical Database: U.S. Geological Survey, Reston, VA.	U.S. Geological Survey	USGS		28.875	-98	0.01	18	18	18	UNKNOWN	SEDIMENTARY	UNKNOWN	UNKNOWN	MUDSTONE																							1	70			10
D156534		USGS		Geochemistry of rock samples from the National Geochemical Database: U.S. Geological Survey, Reston, VA.	U.S. Geological Survey	USGS		28.875	-98	0.01	18	18	18	UNKNOWN	SEDIMENTARY	UNKNOWN	UNKNOWN	MUDSTONE																							1	150			2
D156541		USGS		Geochemistry of rock samples from the National Geochemical Database: U.S. Geological Survey, Reston, VA.	U.S. Geological Survey	USGS		28.375	-98.5	0.01	18	18	18	UNKNOWN	SEDIMENTARY	UNKNOWN	UNKNOWN	MUDSTONE																							0.3	30			10
D158317		USGS		Geochemistry of rock samples from the National Geochemical Database: U.S. Geological Survey, Reston, VA.	U.S. Geological Survey	USGS		37.5833	-104.9	0.01	22	22	22	UNKNOWN	SEDIMENTARY	UNKNOWN	UNKNOWN	MUDSTONE																							3	300	50	15	100
D158321		USGS		Geochemistry of rock samples from the National Geochemical Database: U.S. Geological Survey, Reston, VA.	U.S. Geological Survey	USGS		37.5833	-104.9	0.01	22	22	22	UNKNOWN	SEDIMENTARY	UNKNOWN	UNKNOWN	MUDSTONE																							5	300	30	15	70
D158327		USGS		Geochemistry of rock samples from the National Geochemical Database: U.S. Geological Survey, Reston, VA.	U.S. Geological Survey	USGS		37.5833	-104.9	0.01	22	22	22	UNKNOWN	SEDIMENTARY	UNKNOWN	UNKNOWN	MUDSTONE																							7	200	30	15	100
D158339		USGS		Geochemistry of rock samples from the National Geochemical Database: U.S. Geological Survey, Reston, VA.	U.S. Geological Survey	USGS		37.35	-105	0.01	18	18	18	UNKNOWN	SEDIMENTARY	UNKNOWN	UNKNOWN	MUDSTONE																							3	300	15	10	15
D158342		USGS		Geochemistry of rock samples from the National Geochemical Database: U.S. Geological Survey, Reston, VA.	U.S. Geological Survey	USGS		36.0833	-105.217	0.01	71	70.5	70	UNKNOWN	SEDIMENTARY	UNKNOWN	UNKNOWN	MUDSTONE																							1.5	150	30	15	700
D158367		USGS		Geochemistry of rock samples from the National Geochemical Database: U.S. Geological Survey, Reston, VA.	U.S. Geological Survey	USGS		34.9	-104.983	0.01	71	71	71	UNKNOWN	SEDIMENTARY	UNKNOWN	UNKNOWN	MUDSTONE																							0.5	500	10	7	50
D158376		USGS		Geochemistry of rock samples from the National Geochemical Database: U.S. Geological Survey, Reston, VA.	U.S. Geological Survey	USGS		36.6333	-111.383	0.01	56	56	56	UNKNOWN	SEDIMENTARY	UNKNOWN	UNKNOWN	MUDSTONE																							0.7	50	5		700				2
D158751		USGS		Geochemistry of rock samples from the National Geochemical Database: U.S. Geological Survey, Reston, VA.	U.S. Geological Survey	USGS		37.3333	-104.983	0.01	18	18	18	UNKNOWN	SEDIMENTARY	UNKNOWN	UNKNOWN	MUDSTONE																							2	200	7	5	20
D158760		USGS		Geochemistry of rock samples from the National Geochemical Database: U.S. Geological Survey, Reston, VA.	U.S. Geological Survey	USGS		37.35	-104.967	0.01	18	18	18	UNKNOWN	SEDIMENTARY	UNKNOWN	UNKNOWN	MUDSTONE																							5	1000	30	15	5
D158761		USGS		Geochemistry of rock samples from the National Geochemical Database: U.S. Geological Survey, Reston, VA.	U.S. Geological Survey	USGS		37.35	-104.967	0.01	18	18	18	UNKNOWN	SEDIMENTARY	UNKNOWN	UNKNOWN	MUDSTONE																							3	200	15	7	3
D158762		USGS		Geochemistry of rock samples from the National Geochemical Database: U.S. Geological Survey, Reston, VA.	U.S. Geological Survey	USGS		37.35	-104.967	0.01	18	18	18	UNKNOWN	SEDIMENTARY	UNKNOWN	UNKNOWN	MUDSTONE																							2	200	10	7	3
D158771		USGS		Geochemistry of rock samples from the National Geochemical Database: U.S. Geological Survey, Reston, VA.	U.S. Geological Survey	USGS		37.3667	-104.967	0.01	18	18	18	UNKNOWN	SEDIMENTARY	UNKNOWN	UNKNOWN	MUDSTONE																							3	1500		15	150		1500		3
D158772		USGS		Geochemistry of rock samples from the National Geochemical Database: U.S. Geological Survey, Reston, VA.	U.S. Geological Survey	USGS		37.3667	-104.967	0.01	18	18	18	UNKNOWN	SEDIMENTARY	UNKNOWN	UNKNOWN	MUDSTONE																							5	5000	5	30	150		2000		5
D158775		USGS		Geochemistry of rock samples from the National Geochemical Database: U.S. Geological Survey, Reston, VA.	U.S. Geological Survey	USGS		37.3833	-104.967	0.01	18	18	18	UNKNOWN	SEDIMENTARY	UNKNOWN	UNKNOWN	MUDSTONE																							5	200	30	15
D158781		USGS		Geochemistry of rock samples from the National Geochemical Database: U.S. Geological Survey, Reston, VA.	U.S. Geological Survey	USGS		37.3833	-105.017	0.01	18	18	18	UNKNOWN	SEDIMENTARY	UNKNOWN	UNKNOWN	MUDSTONE																							2	700	10	7	15
D159225		USGS		Geochemistry of rock samples from the National Geochemical Database: U.S. Geological Survey, Reston, VA.	U.S. Geological Survey	USGS		28.375	-98.5	0.01	18	18	18	UNKNOWN	SEDIMENTARY	UNKNOWN	UNKNOWN	MUDSTONE																							1	100	7	5	20
D159226		USGS		Geochemistry of rock samples from the National Geochemical Database: U.S. Geological Survey, Reston, VA.	U.S. Geological Survey	USGS		28.375	-98.5	0.01	18	18	18	UNKNOWN	SEDIMENTARY	UNKNOWN	UNKNOWN	MUDSTONE																							5	100			7
D159227		USGS		Geochemistry of rock samples from the National Geochemical Database: U.S. Geological Survey, Reston, VA.	U.S. Geological Survey	USGS		28.375	-98.5	0.01	18	18	18	UNKNOWN	SEDIMENTARY	UNKNOWN	UNKNOWN	MUDSTONE																							0.7	50			3
D159228		USGS		Geochemistry of rock samples from the National Geochemical Database: U.S. Geological Survey, Reston, VA.	U.S. Geological Survey	USGS		28.375	-98.5	0.01	18	18	18	UNKNOWN	SEDIMENTARY	UNKNOWN	UNKNOWN	MUDSTONE																							3	50	5		30
D159229		USGS		Geochemistry of rock samples from the National Geochemical Database: U.S. Geological Survey, Reston, VA.	U.S. Geological Survey	USGS		28.375	-98.5	0.01	18	18	18	UNKNOWN	SEDIMENTARY	UNKNOWN	UNKNOWN	MUDSTONE																							3	1500	70	20	30
D159471		USGS		Geochemistry of rock samples from the National Geochemical Database: U.S. Geological Survey, Reston, VA.	U.S. Geological Survey	USGS		28.375	-98.625	0.01				UNKNOWN	SEDIMENTARY	UNKNOWN	UNKNOWN	MUDSTONE
D159293		USGS		Geochemistry of rock samples from the National Geochemical Database: U.S. Geological Survey, Reston, VA.	U.S. Geological Survey	USGS		42.3333	-111.183	0.01	56	56	56	UNKNOWN	SEDIMENTARY	UNKNOWN	UNKNOWN	MUDSTONE																							0.5	500	7	5	15
D159513		USGS		Geochemistry of rock samples from the National Geochemical Database: U.S. Geological Survey, Reston, VA.	U.S. Geological Survey	USGS		28.375	-98.5	0.01	18	18	18	UNKNOWN	SEDIMENTARY	UNKNOWN	UNKNOWN	MUDSTONE																							1.5	300	5		10
D159515		USGS		Geochemistry of rock samples from the National Geochemical Database: U.S. Geological Survey, Reston, VA.	U.S. Geological Survey	USGS		28.375	-98.625	0.01	18	18	18	UNKNOWN	SEDIMENTARY	UNKNOWN	UNKNOWN	MUDSTONE																							1.5	300		5	7
D159518		USGS		Geochemistry of rock samples from the National Geochemical Database: U.S. Geological Survey, Reston, VA.	U.S. Geological Survey	USGS		28.375	-98.625	0.01	18	18	18	UNKNOWN	SEDIMENTARY	UNKNOWN	UNKNOWN	MUDSTONE																							1	70			7
D159519		USGS		Geochemistry of rock samples from the National Geochemical Database: U.S. Geological Survey, Reston, VA.	U.S. Geological Survey	USGS		28.375	-98.625	0.01	18	18	18	UNKNOWN	SEDIMENTARY	UNKNOWN	UNKNOWN	MUDSTONE																						10	1.5	300	20	15	7
D159826		USGS		Geochemistry of rock samples from the National Geochemical Database: U.S. Geological Survey, Reston, VA.	U.S. Geological Survey	USGS		42	-113.125	0.01	70	69	68	UNKNOWN	SEDIMENTARY	UNKNOWN	UNKNOWN	MUDSTONE																							5	700	50	7	10
D161025		USGS		Geochemistry of rock samples from the National Geochemical Database: U.S. Geological Survey, Reston, VA.	U.S. Geological Survey	USGS		43.75	-105.75	0.01	18	18	18	UNKNOWN	SEDIMENTARY	UNKNOWN	UNKNOWN	MUDSTONE																							2	150	15	7	30
D163546		USGS		Geochemistry of rock samples from the National Geochemical Database: U.S. Geological Survey, Reston, VA.	U.S. Geological Survey	USGS		43.0667	-112.1	0.01	71	71	71	UNKNOWN	SEDIMENTARY	UNKNOWN	UNKNOWN	MUDSTONE																							1	200	200		200	200	1500
D163547		USGS		Geochemistry of rock samples from the National Geochemical Database: U.S. Geological Survey, Reston, VA.	U.S. Geological Survey	USGS		43.0667	-112.1	0.01	71	71	71	UNKNOWN	SEDIMENTARY	UNKNOWN	UNKNOWN	MUDSTONE																							1.5	50	200		200	200	1500
D163548		USGS		Geochemistry of rock samples from the National Geochemical Database: U.S. Geological Survey, Reston, VA.	U.S. Geological Survey	USGS		43.0667	-112.1	0.01	71	71	71	UNKNOWN	SEDIMENTARY	UNKNOWN	UNKNOWN	MUDSTONE																							1.5	150	150		100		1000
D163549		USGS		Geochemistry of rock samples from the National Geochemical Database: U.S. Geological Survey, Reston, VA.	U.S. Geological Survey	USGS		42.55	-111.233	0.01	71	71	71	UNKNOWN	SEDIMENTARY	UNKNOWN	UNKNOWN	MUDSTONE																							0.7	100	150		70		1500		7
D163550		USGS		Geochemistry of rock samples from the National Geochemical Database: U.S. Geological Survey, Reston, VA.	U.S. Geological Survey	USGS		42.55	-111.233	0.01	71	71	71	UNKNOWN	SEDIMENTARY	UNKNOWN	UNKNOWN	MUDSTONE																							0.7	30	100		70		700		7
D163561		USGS		Geochemistry of rock samples from the National Geochemical Database: U.S. Geological Survey, Reston, VA.	U.S. Geological Survey	USGS		42.55	-111.233	0.01	71	71	71	UNKNOWN	SEDIMENTARY	UNKNOWN	UNKNOWN	MUDSTONE																							0.5	100	70		15
D163567		USGS		Geochemistry of rock samples from the National Geochemical Database: U.S. Geological Survey, Reston, VA.	U.S. Geological Survey	USGS		42.3333	-113.05	0.01	71	71	71	UNKNOWN	SEDIMENTARY	UNKNOWN	UNKNOWN	MUDSTONE																							3	1000	30	15	70				1
D163568		USGS		Geochemistry of rock samples from the National Geochemical Database: U.S. Geological Survey, Reston, VA.	U.S. Geological Survey	USGS		42.3333	-113.05	0.01	71	71	71	UNKNOWN	SEDIMENTARY	UNKNOWN	UNKNOWN	MUDSTONE																							3	1000	70	10	100
D163569		USGS		Geochemistry of rock samples from the National Geochemical Database: U.S. Geological Survey, Reston, VA.	U.S. Geological Survey	USGS		42.3333	-113.05	0.01	71	71	71	UNKNOWN	SEDIMENTARY	UNKNOWN	UNKNOWN	MUDSTONE																							3	300	70		70				1.5
D163570		USGS		Geochemistry of rock samples from the National Geochemical Database: U.S. Geological Survey, Reston, VA.	U.S. Geological Survey	USGS		42.3333	-113.05	0.01	71	71	71	UNKNOWN	SEDIMENTARY	UNKNOWN	UNKNOWN	MUDSTONE																							1.5	300	100		50				1
D163571		USGS		Geochemistry of rock samples from the National Geochemical Database: U.S. Geological Survey, Reston, VA.	U.S. Geological Survey	USGS		42.3333	-113.05	0.01	71	71	71	UNKNOWN	SEDIMENTARY	UNKNOWN	UNKNOWN	MUDSTONE																							1.5	150	150		70		700		1.5
D163572		USGS		Geochemistry of rock samples from the National Geochemical Database: U.S. Geological Survey, Reston, VA.	U.S. Geological Survey	USGS		42.3333	-113.05	0.01	71	71	71	UNKNOWN	SEDIMENTARY	UNKNOWN	UNKNOWN	MUDSTONE																							0.7	100	50		15
D163573		USGS		Geochemistry of rock samples from the National Geochemical Database: U.S. Geological Survey, Reston, VA.	U.S. Geological Survey	USGS		42.3333	-113.05	0.01	71	71	71	UNKNOWN	SEDIMENTARY	UNKNOWN	UNKNOWN	MUDSTONE																							0.7	70	30		15
D163574		USGS		Geochemistry of rock samples from the National Geochemical Database: U.S. Geological Survey, Reston, VA.	U.S. Geological Survey	USGS		42.3333	-113.05	0.01	71	71	71	UNKNOWN	SEDIMENTARY	UNKNOWN	UNKNOWN	MUDSTONE																							0.5	150	15		5
D163575		USGS		Geochemistry of rock samples from the National Geochemical Database: U.S. Geological Survey, Reston, VA.	U.S. Geological Survey	USGS		42.3333	-113.05	0.01	71	71	71	UNKNOWN	SEDIMENTARY	UNKNOWN	UNKNOWN	MUDSTONE																							1.5	1500	50		20
D163576		USGS		Geochemistry of rock samples from the National Geochemical Database: U.S. Geological Survey, Reston, VA.	U.S. Geological Survey	USGS		42.3333	-113.05	0.01	71	71	71	UNKNOWN	SEDIMENTARY	UNKNOWN	UNKNOWN	MUDSTONE																							1	1000	30		15
D163690		USGS		Geochemistry of rock samples from the National Geochemical Database: U.S. Geological Survey, Reston, VA.	U.S. Geological Survey	USGS		40.7167	-111.75	0.01	71	71	71	UNKNOWN	SEDIMENTARY	UNKNOWN	UNKNOWN	MUDSTONE																							0.7	70	15		7
D163691		USGS		Geochemistry of rock samples from the National Geochemical Database: U.S. Geological Survey, Reston, VA.	U.S. Geological Survey	USGS		40.7167	-111.75	0.01	71	71	71	UNKNOWN	SEDIMENTARY	UNKNOWN	UNKNOWN	MUDSTONE																							0.5	100	10		5
D163697		USGS		Geochemistry of rock samples from the National Geochemical Database: U.S. Geological Survey, Reston, VA.	U.S. Geological Survey	USGS		40.7167	-111.75	0.01	71	71	71	UNKNOWN	SEDIMENTARY	UNKNOWN	UNKNOWN	MUDSTONE																							1	100	30		10
D163698		USGS		Geochemistry of rock samples from the National Geochemical Database: U.S. Geological Survey, Reston, VA.	U.S. Geological Survey	USGS		40.7167	-111.75	0.01	71	71	71	UNKNOWN	SEDIMENTARY	UNKNOWN	UNKNOWN	MUDSTONE																							0.7	50	10		3
D163700		USGS		Geochemistry of rock samples from the National Geochemical Database: U.S. Geological Survey, Reston, VA.	U.S. Geological Survey	USGS		40.7167	-111.75	0.01	71	71	71	UNKNOWN	SEDIMENTARY	UNKNOWN	UNKNOWN	MUDSTONE																							1	150	20		20
D163705		USGS		Geochemistry of rock samples from the National Geochemical Database: U.S. Geological Survey, Reston, VA.	U.S. Geological Survey	USGS		41.05	-111.583	0.01	71	71	71	UNKNOWN	SEDIMENTARY	UNKNOWN	UNKNOWN	MUDSTONE																							1	100	70		50				3
D163706		USGS		Geochemistry of rock samples from the National Geochemical Database: U.S. Geological Survey, Reston, VA.	U.S. Geological Survey	USGS		41.05	-111.583	0.01	71	71	71	UNKNOWN	SEDIMENTARY	UNKNOWN	UNKNOWN	MUDSTONE																							1.5	100	50		20				3
D163707		USGS		Geochemistry of rock samples from the National Geochemical Database: U.S. Geological Survey, Reston, VA.	U.S. Geological Survey	USGS		41.05	-111.583	0.01	71	71	71	UNKNOWN	SEDIMENTARY	UNKNOWN	UNKNOWN	MUDSTONE																							2	100	30		15				1.5
D163708		USGS		Geochemistry of rock samples from the National Geochemical Database: U.S. Geological Survey, Reston, VA.	U.S. Geological Survey	USGS		41.05	-111.583	0.01	71	71	71	UNKNOWN	SEDIMENTARY	UNKNOWN	UNKNOWN	MUDSTONE																							1.5	150	70		30				3
D163709		USGS		Geochemistry of rock samples from the National Geochemical Database: U.S. Geological Survey, Reston, VA.	U.S. Geological Survey	USGS		41.05	-111.583	0.01	71	71	71	UNKNOWN	SEDIMENTARY	UNKNOWN	UNKNOWN	MUDSTONE																							0.5	70	15		7				1.5
D163710		USGS		Geochemistry of rock samples from the National Geochemical Database: U.S. Geological Survey, Reston, VA.	U.S. Geological Survey	USGS		41.05	-111.583	0.01	71	71	71	UNKNOWN	SEDIMENTARY	UNKNOWN	UNKNOWN	MUDSTONE																							1	100	70		15				5
D163711		USGS		Geochemistry of rock samples from the National Geochemical Database: U.S. Geological Survey, Reston, VA.	U.S. Geological Survey	USGS		41.05	-111.583	0.01	71	71	71	UNKNOWN	SEDIMENTARY	UNKNOWN	UNKNOWN	MUDSTONE																							1	50	30		7				1.5
D163712		USGS		Geochemistry of rock samples from the National Geochemical Database: U.S. Geological Survey, Reston, VA.	U.S. Geological Survey	USGS		41.05	-111.583	0.01	71	71	71	UNKNOWN	SEDIMENTARY	UNKNOWN	UNKNOWN	MUDSTONE																							0.5	100	15		7				1
D163713		USGS		Geochemistry of rock samples from the National Geochemical Database: U.S. Geological Survey, Reston, VA.	U.S. Geological Survey	USGS		41.05	-111.583	0.01	71	71	71	UNKNOWN	SEDIMENTARY	UNKNOWN	UNKNOWN	MUDSTONE																							0.5	70	15		7
D163714		USGS		Geochemistry of rock samples from the National Geochemical Database: U.S. Geological Survey, Reston, VA.	U.S. Geological Survey	USGS		41.05	-111.583	0.01	71	71	71	UNKNOWN	SEDIMENTARY	UNKNOWN	UNKNOWN	MUDSTONE																							0.3	30	20		10				1.5
D163715		USGS		Geochemistry of rock samples from the National Geochemical Database: U.S. Geological Survey, Reston, VA.	U.S. Geological Survey	USGS		41.05	-111.583	0.01	71	71	71	UNKNOWN	SEDIMENTARY	UNKNOWN	UNKNOWN	MUDSTONE																							0.5	20	15		15				3
D163721		USGS		Geochemistry of rock samples from the National Geochemical Database: U.S. Geological Survey, Reston, VA.	U.S. Geological Survey	USGS		41.6833	-111.083	0.01	71	71	71	UNKNOWN	SEDIMENTARY	UNKNOWN	UNKNOWN	MUDSTONE																							0.7	70	70		50		1000		5
D163722		USGS		Geochemistry of rock samples from the National Geochemical Database: U.S. Geological Survey, Reston, VA.	U.S. Geological Survey	USGS		41.6833	-111.083	0.01	71	71	71	UNKNOWN	SEDIMENTARY	UNKNOWN	UNKNOWN	MUDSTONE																							0.7	70	30		10
D163723		USGS		Geochemistry of rock samples from the National Geochemical Database: U.S. Geological Survey, Reston, VA.	U.S. Geological Survey	USGS		41.6833	-111.083	0.01	71	71	71	UNKNOWN	SEDIMENTARY	UNKNOWN	UNKNOWN	MUDSTONE																							1	100	50		20				3
D163724		USGS		Geochemistry of rock samples from the National Geochemical Database: U.S. Geological Survey, Reston, VA.	U.S. Geological Survey	USGS		41.6833	-111.083	0.01	71	71	71	UNKNOWN	SEDIMENTARY	UNKNOWN	UNKNOWN	MUDSTONE																							1	50	100		70		700		5
D163725		USGS		Geochemistry of rock samples from the National Geochemical Database: U.S. Geological Survey, Reston, VA.	U.S. Geological Survey	USGS		41.6833	-111.083	0.01	71	71	71	UNKNOWN	SEDIMENTARY	UNKNOWN	UNKNOWN	MUDSTONE																							1.5	100	150		70
D163726		USGS		Geochemistry of rock samples from the National Geochemical Database: U.S. Geological Survey, Reston, VA.	U.S. Geological Survey	USGS		41.6833	-111.083	0.01	71	71	71	UNKNOWN	SEDIMENTARY	UNKNOWN	UNKNOWN	MUDSTONE																							1.5	70	150		100		700
D163727		USGS		Geochemistry of rock samples from the National Geochemical Database: U.S. Geological Survey, Reston, VA.	U.S. Geological Survey	USGS		41.6833	-111.083	0.01	71	71	71	UNKNOWN	SEDIMENTARY	UNKNOWN	UNKNOWN	MUDSTONE																							1.5	100	100		70				3
D163728		USGS		Geochemistry of rock samples from the National Geochemical Database: U.S. Geological Survey, Reston, VA.	U.S. Geological Survey	USGS		41.6833	-111.083	0.01	71	71	71	UNKNOWN	SEDIMENTARY	UNKNOWN	UNKNOWN	MUDSTONE																							1.5	100	100		70				3
D163729		USGS		Geochemistry of rock samples from the National Geochemical Database: U.S. Geological Survey, Reston, VA.	U.S. Geological Survey	USGS		41.6833	-111.083	0.01	71	71	71	UNKNOWN	SEDIMENTARY	UNKNOWN	UNKNOWN	MUDSTONE																							1.5	150	200		100		700
D163731		USGS		Geochemistry of rock samples from the National Geochemical Database: U.S. Geological Survey, Reston, VA.	U.S. Geological Survey	USGS		41.6833	-111.083	0.01	71	71	71	UNKNOWN	SEDIMENTARY	UNKNOWN	UNKNOWN	MUDSTONE																							0.7	70	30		10
D163732		USGS		Geochemistry of rock samples from the National Geochemical Database: U.S. Geological Survey, Reston, VA.	U.S. Geological Survey	USGS		41.6833	-111.083	0.01	71	71	71	UNKNOWN	SEDIMENTARY	UNKNOWN	UNKNOWN	MUDSTONE																							1.5	50	100		50		700		5
D163733		USGS		Geochemistry of rock samples from the National Geochemical Database: U.S. Geological Survey, Reston, VA.	U.S. Geological Survey	USGS		41.6833	-111.083	0.01	71	71	71	UNKNOWN	SEDIMENTARY	UNKNOWN	UNKNOWN	MUDSTONE																							1	150	70		50		700		3
D163736		USGS		Geochemistry of rock samples from the National Geochemical Database: U.S. Geological Survey, Reston, VA.	U.S. Geological Survey	USGS		41.6833	-111.083	0.01	71	71	71	UNKNOWN	SEDIMENTARY	UNKNOWN	UNKNOWN	MUDSTONE																							2	150	30		20
D163737		USGS		Geochemistry of rock samples from the National Geochemical Database: U.S. Geological Survey, Reston, VA.	U.S. Geological Survey	USGS		41.6833	-111.083	0.01	71	71	71	UNKNOWN	SEDIMENTARY	UNKNOWN	UNKNOWN	MUDSTONE																							1.5	150	30		10
D163738		USGS		Geochemistry of rock samples from the National Geochemical Database: U.S. Geological Survey, Reston, VA.	U.S. Geological Survey	USGS		41.6833	-111.083	0.01	71	71	71	UNKNOWN	SEDIMENTARY	UNKNOWN	UNKNOWN	MUDSTONE																							1	150	20		7
D163740		USGS		Geochemistry of rock samples from the National Geochemical Database: U.S. Geological Survey, Reston, VA.	U.S. Geological Survey	USGS		42.2167	-111.45	0.01	71	71	71	UNKNOWN	SEDIMENTARY	UNKNOWN	UNKNOWN	MUDSTONE																							0.3	100	30		5
D163742		USGS		Geochemistry of rock samples from the National Geochemical Database: U.S. Geological Survey, Reston, VA.	U.S. Geological Survey	USGS		42.2167	-111.45	0.01	71	71	71	UNKNOWN	SEDIMENTARY	UNKNOWN	UNKNOWN	MUDSTONE																							1.5	200	150		70		700		2
D163745		USGS		Geochemistry of rock samples from the National Geochemical Database: U.S. Geological Survey, Reston, VA.	U.S. Geological Survey	USGS		42.2167	-111.45	0.01	71	71	71	UNKNOWN	SEDIMENTARY	UNKNOWN	UNKNOWN	MUDSTONE																							0.7	70	150		100	150	700
D163746		USGS		Geochemistry of rock samples from the National Geochemical Database: U.S. Geological Survey, Reston, VA.	U.S. Geological Survey	USGS		42.2167	-111.45	0.01	71	71	71	UNKNOWN	SEDIMENTARY	UNKNOWN	UNKNOWN	MUDSTONE																							1.5	100	150		50	100	700		7
D163747		USGS		Geochemistry of rock samples from the National Geochemical Database: U.S. Geological Survey, Reston, VA.	U.S. Geological Survey	USGS		42.2167	-111.45	0.01	71	71	71	UNKNOWN	SEDIMENTARY	UNKNOWN	UNKNOWN	MUDSTONE																							1.5	30	150		70		700		5
D163748		USGS		Geochemistry of rock samples from the National Geochemical Database: U.S. Geological Survey, Reston, VA.	U.S. Geological Survey	USGS		42.2167	-111.45	0.01	71	71	71	UNKNOWN	SEDIMENTARY	UNKNOWN	UNKNOWN	MUDSTONE																							1	50	150		100	100	700
D163749		USGS		Geochemistry of rock samples from the National Geochemical Database: U.S. Geological Survey, Reston, VA.	U.S. Geological Survey	USGS		42.2167	-111.45	0.01	71	71	71	UNKNOWN	SEDIMENTARY	UNKNOWN	UNKNOWN	MUDSTONE																							1.5	70	150		100		700
D163750		USGS		Geochemistry of rock samples from the National Geochemical Database: U.S. Geological Survey, Reston, VA.	U.S. Geological Survey	USGS		42.2167	-111.45	0.01	71	71	71	UNKNOWN	SEDIMENTARY	UNKNOWN	UNKNOWN	MUDSTONE																							2	70	100		50
D163751		USGS		Geochemistry of rock samples from the National Geochemical Database: U.S. Geological Survey, Reston, VA.	U.S. Geological Survey	USGS		42.2167	-111.45	0.01	71	71	71	UNKNOWN	SEDIMENTARY	UNKNOWN	UNKNOWN	MUDSTONE																							2	200	200	10	70		1000
D163752		USGS		Geochemistry of rock samples from the National Geochemical Database: U.S. Geological Survey, Reston, VA.	U.S. Geological Survey	USGS		42.2167	-111.45	0.01	71	71	71	UNKNOWN	SEDIMENTARY	UNKNOWN	UNKNOWN	MUDSTONE																							1.5	50	200		200	200	1500
D163753		USGS		Geochemistry of rock samples from the National Geochemical Database: U.S. Geological Survey, Reston, VA.	U.S. Geological Survey	USGS		42.2167	-111.45	0.01	71	71	71	UNKNOWN	SEDIMENTARY	UNKNOWN	UNKNOWN	MUDSTONE																							1	300	150		100	200	1500
D163754		USGS		Geochemistry of rock samples from the National Geochemical Database: U.S. Geological Survey, Reston, VA.	U.S. Geological Survey	USGS		42.2167	-111.45	0.01	71	71	71	UNKNOWN	SEDIMENTARY	UNKNOWN	UNKNOWN	MUDSTONE																							0.7	100	100		50	100	1000
D163756		USGS		Geochemistry of rock samples from the National Geochemical Database: U.S. Geological Survey, Reston, VA.	U.S. Geological Survey	USGS		42.2167	-111.45	0.01	71	71	71	UNKNOWN	SEDIMENTARY	UNKNOWN	UNKNOWN	MUDSTONE																							1	70	200		100	300	3000		7
D163761		USGS		Geochemistry of rock samples from the National Geochemical Database: U.S. Geological Survey, Reston, VA.	U.S. Geological Survey	USGS		42.7333	-111.533	0.01	71	71	71	UNKNOWN	SEDIMENTARY	UNKNOWN	UNKNOWN	MUDSTONE																							0.7	100	100		70		700
D163762		USGS		Geochemistry of rock samples from the National Geochemical Database: U.S. Geological Survey, Reston, VA.	U.S. Geological Survey	USGS		42.7333	-111.533	0.01	71	71	71	UNKNOWN	SEDIMENTARY	UNKNOWN	UNKNOWN	MUDSTONE																							0.7	150	100		50	100	700
D163776		USGS		Geochemistry of rock samples from the National Geochemical Database: U.S. Geological Survey, Reston, VA.	U.S. Geological Survey	USGS		42.7333	-111.533	0.01	71	71	71	UNKNOWN	SEDIMENTARY	UNKNOWN	UNKNOWN	MUDSTONE																							2	150	100	10	70		700
D163777		USGS		Geochemistry of rock samples from the National Geochemical Database: U.S. Geological Survey, Reston, VA.	U.S. Geological Survey	USGS		42.7333	-111.533	0.01	71	71	71	UNKNOWN	SEDIMENTARY	UNKNOWN	UNKNOWN	MUDSTONE																							1	20	100		70				3
D163778		USGS		Geochemistry of rock samples from the National Geochemical Database: U.S. Geological Survey, Reston, VA.	U.S. Geological Survey	USGS		42.7333	-111.533	0.01	71	71	71	UNKNOWN	SEDIMENTARY	UNKNOWN	UNKNOWN	MUDSTONE																							1.5	70	150	10	150		1000
D163779		USGS		Geochemistry of rock samples from the National Geochemical Database: U.S. Geological Survey, Reston, VA.	U.S. Geological Survey	USGS		42.7333	-111.533	0.01	71	71	71	UNKNOWN	SEDIMENTARY	UNKNOWN	UNKNOWN	MUDSTONE																							1.5	20	70		70
D163780		USGS		Geochemistry of rock samples from the National Geochemical Database: U.S. Geological Survey, Reston, VA.	U.S. Geological Survey	USGS		42.7333	-111.533	0.01	71	71	71	UNKNOWN	SEDIMENTARY	UNKNOWN	UNKNOWN	MUDSTONE																							1.5	70	200	10	150		1500
D163781		USGS		Geochemistry of rock samples from the National Geochemical Database: U.S. Geological Survey, Reston, VA.	U.S. Geological Survey	USGS		42.7333	-111.533	0.01	71	71	71	UNKNOWN	SEDIMENTARY	UNKNOWN	UNKNOWN	MUDSTONE																							1.5	70	200	10	100		1500
D163782		USGS		Geochemistry of rock samples from the National Geochemical Database: U.S. Geological Survey, Reston, VA.	U.S. Geological Survey	USGS		42.7333	-111.533	0.01	71	71	71	UNKNOWN	SEDIMENTARY	UNKNOWN	UNKNOWN	MUDSTONE																							1	30	300		150	300	3000		15
D163783		USGS		Geochemistry of rock samples from the National Geochemical Database: U.S. Geological Survey, Reston, VA.	U.S. Geological Survey	USGS		42.7333	-111.533	0.01	71	71	71	UNKNOWN	SEDIMENTARY	UNKNOWN	UNKNOWN	MUDSTONE																							1.5	20	70		100	150	700
D163784		USGS		Geochemistry of rock samples from the National Geochemical Database: U.S. Geological Survey, Reston, VA.	U.S. Geological Survey	USGS		42.7333	-111.533	0.01	71	71	71	UNKNOWN	SEDIMENTARY	UNKNOWN	UNKNOWN	MUDSTONE																							2	150	150		100	200	1500
D163786		USGS		Geochemistry of rock samples from the National Geochemical Database: U.S. Geological Survey, Reston, VA.	U.S. Geological Survey	USGS		42.7333	-111.533	0.01	71	71	71	UNKNOWN	SEDIMENTARY	UNKNOWN	UNKNOWN	MUDSTONE																							2	200	150	10	70	150	1500
D163789		USGS		Geochemistry of rock samples from the National Geochemical Database: U.S. Geological Survey, Reston, VA.	U.S. Geological Survey	USGS		43.4167	-111.417	0.01	71	71	71	UNKNOWN	SEDIMENTARY	UNKNOWN	UNKNOWN	MUDSTONE																							2	200	15	10	10
D163790		USGS		Geochemistry of rock samples from the National Geochemical Database: U.S. Geological Survey, Reston, VA.	U.S. Geological Survey	USGS		43.4167	-111.417	0.01	71	71	71	UNKNOWN	SEDIMENTARY	UNKNOWN	UNKNOWN	MUDSTONE																							1.5	200	30	10	10
D163791		USGS		Geochemistry of rock samples from the National Geochemical Database: U.S. Geological Survey, Reston, VA.	U.S. Geological Survey	USGS		43.4167	-111.417	0.01	71	71	71	UNKNOWN	SEDIMENTARY	UNKNOWN	UNKNOWN	MUDSTONE																							0.2	300	20		7
D163796		USGS		Geochemistry of rock samples from the National Geochemical Database: U.S. Geological Survey, Reston, VA.	U.S. Geological Survey	USGS		43.4167	-111.417	0.01	71	71	71	UNKNOWN	SEDIMENTARY	UNKNOWN	UNKNOWN	MUDSTONE																							1.5	70	100		30		1000		3
D163798		USGS		Geochemistry of rock samples from the National Geochemical Database: U.S. Geological Survey, Reston, VA.	U.S. Geological Survey	USGS		43.4167	-111.417	0.01	71	71	71	UNKNOWN	SEDIMENTARY	UNKNOWN	UNKNOWN	MUDSTONE																							0.7	100	100		30		1500		3
D163800		USGS		Geochemistry of rock samples from the National Geochemical Database: U.S. Geological Survey, Reston, VA.	U.S. Geological Survey	USGS		43.4167	-111.417	0.01	71	71	71	UNKNOWN	SEDIMENTARY	UNKNOWN	UNKNOWN	MUDSTONE																							1	100	200		100		1500
D163801		USGS		Geochemistry of rock samples from the National Geochemical Database: U.S. Geological Survey, Reston, VA.	U.S. Geological Survey	USGS		43.4167	-111.417	0.01	71	71	71	UNKNOWN	SEDIMENTARY	UNKNOWN	UNKNOWN	MUDSTONE																							1	70	300		200	150	1500
D163802		USGS		Geochemistry of rock samples from the National Geochemical Database: U.S. Geological Survey, Reston, VA.	U.S. Geological Survey	USGS		43.4167	-111.417	0.01	71	71	71	UNKNOWN	SEDIMENTARY	UNKNOWN	UNKNOWN	MUDSTONE																							1.5	150	150		70	100	1000		5
D163803		USGS		Geochemistry of rock samples from the National Geochemical Database: U.S. Geological Survey, Reston, VA.	U.S. Geological Survey	USGS		43.4167	-111.417	0.01	71	71	71	UNKNOWN	SEDIMENTARY	UNKNOWN	UNKNOWN	MUDSTONE																							2	150	200		100	150	1500		10
D163805		USGS		Geochemistry of rock samples from the National Geochemical Database: U.S. Geological Survey, Reston, VA.	U.S. Geological Survey	USGS		43.4167	-111.417	0.01	71	71	71	UNKNOWN	SEDIMENTARY	UNKNOWN	UNKNOWN	MUDSTONE																							0.7	20	30		50		1000
D163811		USGS		Geochemistry of rock samples from the National Geochemical Database: U.S. Geological Survey, Reston, VA.	U.S. Geological Survey	USGS		40.4308	-112.293	0.01	70	69	68	UNKNOWN	SEDIMENTARY	UNKNOWN	UNKNOWN	MUDSTONE																							1.5	200	20		7
D163812		USGS		Geochemistry of rock samples from the National Geochemical Database: U.S. Geological Survey, Reston, VA.	U.S. Geological Survey	USGS		40.4311	-112.293	0.01	70	69	68	UNKNOWN	SEDIMENTARY	UNKNOWN	UNKNOWN	MUDSTONE																							1	300	30		7
D163815		USGS		Geochemistry of rock samples from the National Geochemical Database: U.S. Geological Survey, Reston, VA.	U.S. Geological Survey	USGS		40.4311	-112.293	0.01	70	69	68	UNKNOWN	SEDIMENTARY	UNKNOWN	UNKNOWN	MUDSTONE																							0.7	70	30		7
D163863		USGS		Geochemistry of rock samples from the National Geochemical Database: U.S. Geological Survey, Reston, VA.	U.S. Geological Survey	USGS		43.6333	-110.55	0.01	71	71	71	UNKNOWN	SEDIMENTARY	UNKNOWN	UNKNOWN	MUDSTONE																							0.7	150	20		20
D163864		USGS		Geochemistry of rock samples from the National Geochemical Database: U.S. Geological Survey, Reston, VA.	U.S. Geological Survey	USGS		43.6333	-110.55	0.01	71	71	71	UNKNOWN	SEDIMENTARY	UNKNOWN	UNKNOWN	MUDSTONE																							1.5	50	50		10
D163865		USGS		Geochemistry of rock samples from the National Geochemical Database: U.S. Geological Survey, Reston, VA.	U.S. Geological Survey	USGS		43.6333	-110.55	0.01	71	71	71	UNKNOWN	SEDIMENTARY	UNKNOWN	UNKNOWN	MUDSTONE																							2	70	100		7
D163866		USGS		Geochemistry of rock samples from the National Geochemical Database: U.S. Geological Survey, Reston, VA.	U.S. Geological Survey	USGS		43.6333	-110.55	0.01	71	71	71	UNKNOWN	SEDIMENTARY	UNKNOWN	UNKNOWN	MUDSTONE																							1	100	50		5		700
D163867		USGS		Geochemistry of rock samples from the National Geochemical Database: U.S. Geological Survey, Reston, VA.	U.S. Geological Survey	USGS		43.6333	-110.55	0.01	71	71	71	UNKNOWN	SEDIMENTARY	UNKNOWN	UNKNOWN	MUDSTONE																							1	70	70		10
D163868		USGS		Geochemistry of rock samples from the National Geochemical Database: U.S. Geological Survey, Reston, VA.	U.S. Geological Survey	USGS		43.6333	-110.55	0.01	71	71	71	UNKNOWN	SEDIMENTARY	UNKNOWN	UNKNOWN	MUDSTONE																							1.5	150	70		50		1000		3
D163869		USGS		Geochemistry of rock samples from the National Geochemical Database: U.S. Geological Survey, Reston, VA.	U.S. Geological Survey	USGS		43.6333	-110.55	0.01	71	71	71	UNKNOWN	SEDIMENTARY	UNKNOWN	UNKNOWN	MUDSTONE																							2	200	70		70		1500		3
D163873		USGS		Geochemistry of rock samples from the National Geochemical Database: U.S. Geological Survey, Reston, VA.	U.S. Geological Survey	USGS		43.6333	-110.55	0.01	71	71	71	UNKNOWN	SEDIMENTARY	UNKNOWN	UNKNOWN	MUDSTONE																							1.5	3000	10		15
D163874		USGS		Geochemistry of rock samples from the National Geochemical Database: U.S. Geological Survey, Reston, VA.	U.S. Geological Survey	USGS		43.6333	-110.55	0.01	71	71	71	UNKNOWN	SEDIMENTARY	UNKNOWN	UNKNOWN	MUDSTONE																							1.5	15000			7
D163875		USGS		Geochemistry of rock samples from the National Geochemical Database: U.S. Geological Survey, Reston, VA.	U.S. Geological Survey	USGS		43.6333	-110.55	0.01	71	71	71	UNKNOWN	SEDIMENTARY	UNKNOWN	UNKNOWN	MUDSTONE																							2	3000	10		20
D163876		USGS		Geochemistry of rock samples from the National Geochemical Database: U.S. Geological Survey, Reston, VA.	U.S. Geological Survey	USGS		43.6333	-110.55	0.01	71	71	71	UNKNOWN	SEDIMENTARY	UNKNOWN	UNKNOWN	MUDSTONE																							2	3000	10		50
D163877		USGS		Geochemistry of rock samples from the National Geochemical Database: U.S. Geological Survey, Reston, VA.	U.S. Geological Survey	USGS		43.6333	-110.55	0.01	71	71	71	UNKNOWN	SEDIMENTARY	UNKNOWN	UNKNOWN	MUDSTONE																							1.5	5000	10		20
D163879		USGS		Geochemistry of rock samples from the National Geochemical Database: U.S. Geological Survey, Reston, VA.	U.S. Geological Survey	USGS		43.25	-110.8	0.01	71	71	71	UNKNOWN	SEDIMENTARY	UNKNOWN	UNKNOWN	MUDSTONE																							2	150	50		15				2
D163882		USGS		Geochemistry of rock samples from the National Geochemical Database: U.S. Geological Survey, Reston, VA.	U.S. Geological Survey	USGS		43.25	-110.8	0.01	71	71	71	UNKNOWN	SEDIMENTARY	UNKNOWN	UNKNOWN	MUDSTONE																							0.5	150	30		15				2
D163884		USGS		Geochemistry of rock samples from the National Geochemical Database: U.S. Geological Survey, Reston, VA.	U.S. Geological Survey	USGS		43.25	-110.8	0.01	71	71	71	UNKNOWN	SEDIMENTARY	UNKNOWN	UNKNOWN	MUDSTONE																							1.5	300	70		50		700		7
D163886		USGS		Geochemistry of rock samples from the National Geochemical Database: U.S. Geological Survey, Reston, VA.	U.S. Geological Survey	USGS		43.25	-110.8	0.01	71	71	71	UNKNOWN	SEDIMENTARY	UNKNOWN	UNKNOWN	MUDSTONE																							0.7	200	50		7				1
D163888		USGS		Geochemistry of rock samples from the National Geochemical Database: U.S. Geological Survey, Reston, VA.	U.S. Geological Survey	USGS		43.25	-110.8	0.01	71	71	71	UNKNOWN	SEDIMENTARY	UNKNOWN	UNKNOWN	MUDSTONE																							2	150	70		20				2
D163890		USGS		Geochemistry of rock samples from the National Geochemical Database: U.S. Geological Survey, Reston, VA.	U.S. Geological Survey	USGS		42.5833	-109.75	0.01	71	71	71	UNKNOWN	SEDIMENTARY	UNKNOWN	UNKNOWN	MUDSTONE																							1.5	100	15		15
D163891		USGS		Geochemistry of rock samples from the National Geochemical Database: U.S. Geological Survey, Reston, VA.	U.S. Geological Survey	USGS		42.5833	-109.75	0.01	71	71	71	UNKNOWN	SEDIMENTARY	UNKNOWN	UNKNOWN	MUDSTONE																							1	150	10		20
D163892		USGS		Geochemistry of rock samples from the National Geochemical Database: U.S. Geological Survey, Reston, VA.	U.S. Geological Survey	USGS		42.5833	-109.75	0.01	71	71	71	UNKNOWN	SEDIMENTARY	UNKNOWN	UNKNOWN	MUDSTONE																							1.5	200	15		15
D163893		USGS		Geochemistry of rock samples from the National Geochemical Database: U.S. Geological Survey, Reston, VA.	U.S. Geological Survey	USGS		42.5833	-109.75	0.01	71	71	71	UNKNOWN	SEDIMENTARY	UNKNOWN	UNKNOWN	MUDSTONE																							2	150	70		50		500
D163894		USGS		Geochemistry of rock samples from the National Geochemical Database: U.S. Geological Survey, Reston, VA.	U.S. Geological Survey	USGS		42.5833	-109.75	0.01	71	71	71	UNKNOWN	SEDIMENTARY	UNKNOWN	UNKNOWN	MUDSTONE																							3	150	70		30
D163895		USGS		Geochemistry of rock samples from the National Geochemical Database: U.S. Geological Survey, Reston, VA.	U.S. Geological Survey	USGS		42.5833	-109.75	0.01	71	71	71	UNKNOWN	SEDIMENTARY	UNKNOWN	UNKNOWN	MUDSTONE																							2	200	50		30
D163896		USGS		Geochemistry of rock samples from the National Geochemical Database: U.S. Geological Survey, Reston, VA.	U.S. Geological Survey	USGS		42.5833	-109.75	0.01	71	71	71	UNKNOWN	SEDIMENTARY	UNKNOWN	UNKNOWN	MUDSTONE																							2	150	70		50
D163901		USGS		Geochemistry of rock samples from the National Geochemical Database: U.S. Geological Survey, Reston, VA.	U.S. Geological Survey	USGS		43.2667	-110.017	0.01	71	71	71	UNKNOWN	SEDIMENTARY	UNKNOWN	UNKNOWN	MUDSTONE																							3	150	100	10	70		700		3
D163902		USGS		Geochemistry of rock samples from the National Geochemical Database: U.S. Geological Survey, Reston, VA.	U.S. Geological Survey	USGS		43.2667	-110.017	0.01	71	71	71	UNKNOWN	SEDIMENTARY	UNKNOWN	UNKNOWN	MUDSTONE																							3	150	100	10	50		700
D163903		USGS		Geochemistry of rock samples from the National Geochemical Database: U.S. Geological Survey, Reston, VA.	U.S. Geological Survey	USGS		43.2667	-110.017	0.01	71	71	71	UNKNOWN	SEDIMENTARY	UNKNOWN	UNKNOWN	MUDSTONE																							2	150	70		50		700
D163904		USGS		Geochemistry of rock samples from the National Geochemical Database: U.S. Geological Survey, Reston, VA.	U.S. Geological Survey	USGS		43.2667	-110.017	0.01	71	71	71	UNKNOWN	SEDIMENTARY	UNKNOWN	UNKNOWN	MUDSTONE																							1	100	50		30		700
D163905		USGS		Geochemistry of rock samples from the National Geochemical Database: U.S. Geological Survey, Reston, VA.	U.S. Geological Survey	USGS		43.2667	-110.017	0.01	71	71	71	UNKNOWN	SEDIMENTARY	UNKNOWN	UNKNOWN	MUDSTONE																							1.5	100	30		30
D163906		USGS		Geochemistry of rock samples from the National Geochemical Database: U.S. Geological Survey, Reston, VA.	U.S. Geological Survey	USGS		43.2667	-110.017	0.01	71	71	71	UNKNOWN	SEDIMENTARY	UNKNOWN	UNKNOWN	MUDSTONE																							1	100	20		10
D163907		USGS		Geochemistry of rock samples from the National Geochemical Database: U.S. Geological Survey, Reston, VA.	U.S. Geological Survey	USGS		42.5833	-110.583	0.01	71	71	71	UNKNOWN	SEDIMENTARY	UNKNOWN	UNKNOWN	MUDSTONE																							1.5	200	100		15		1000
D163908		USGS		Geochemistry of rock samples from the National Geochemical Database: U.S. Geological Survey, Reston, VA.	U.S. Geological Survey	USGS		42.5833	-110.583	0.01	71	71	71	UNKNOWN	SEDIMENTARY	UNKNOWN	UNKNOWN	MUDSTONE																							0.15	200	50		7
D163909		USGS		Geochemistry of rock samples from the National Geochemical Database: U.S. Geological Survey, Reston, VA.	U.S. Geological Survey	USGS		42.5833	-110.583	0.01	71	71	71	UNKNOWN	SEDIMENTARY	UNKNOWN	UNKNOWN	MUDSTONE																							1.5	100	150		100	100	1500		5
D163910		USGS		Geochemistry of rock samples from the National Geochemical Database: U.S. Geological Survey, Reston, VA.	U.S. Geological Survey	USGS		42.5833	-110.583	0.01	71	71	71	UNKNOWN	SEDIMENTARY	UNKNOWN	UNKNOWN	MUDSTONE																							2	70	200		200	150	1500
D163911		USGS		Geochemistry of rock samples from the National Geochemical Database: U.S. Geological Survey, Reston, VA.	U.S. Geological Survey	USGS		42.5833	-110.583	0.01	71	71	71	UNKNOWN	SEDIMENTARY	UNKNOWN	UNKNOWN	MUDSTONE																							1.5	150	100		50		700		7
D163912		USGS		Geochemistry of rock samples from the National Geochemical Database: U.S. Geological Survey, Reston, VA.	U.S. Geological Survey	USGS		42.5833	-110.583	0.01	71	71	71	UNKNOWN	SEDIMENTARY	UNKNOWN	UNKNOWN	MUDSTONE																							0.5	200	30		7
D163913		USGS		Geochemistry of rock samples from the National Geochemical Database: U.S. Geological Survey, Reston, VA.	U.S. Geological Survey	USGS		42.5833	-110.583	0.01	71	71	71	UNKNOWN	SEDIMENTARY	UNKNOWN	UNKNOWN	MUDSTONE																							1.5	100	150		200	150	1500
D163914		USGS		Geochemistry of rock samples from the National Geochemical Database: U.S. Geological Survey, Reston, VA.	U.S. Geological Survey	USGS		42.5833	-110.583	0.01	71	71	71	UNKNOWN	SEDIMENTARY	UNKNOWN	UNKNOWN	MUDSTONE																							1.5	150	100		100	100	1500
D163915		USGS		Geochemistry of rock samples from the National Geochemical Database: U.S. Geological Survey, Reston, VA.	U.S. Geological Survey	USGS		42.5833	-110.583	0.01	71	71	71	UNKNOWN	SEDIMENTARY	UNKNOWN	UNKNOWN	MUDSTONE																							2	150	300	10	200	150	1500		10
D163916		USGS		Geochemistry of rock samples from the National Geochemical Database: U.S. Geological Survey, Reston, VA.	U.S. Geological Survey	USGS		42.5833	-110.583	0.01	71	71	71	UNKNOWN	SEDIMENTARY	UNKNOWN	UNKNOWN	MUDSTONE																							1	150	70		20	100			7
D163917		USGS		Geochemistry of rock samples from the National Geochemical Database: U.S. Geological Survey, Reston, VA.	U.S. Geological Survey	USGS		42.5833	-110.583	0.01	71	71	71	UNKNOWN	SEDIMENTARY	UNKNOWN	UNKNOWN	MUDSTONE																							1	150	100		100	100	700
D163918		USGS		Geochemistry of rock samples from the National Geochemical Database: U.S. Geological Survey, Reston, VA.	U.S. Geological Survey	USGS		42.5833	-110.583	0.01	71	71	71	UNKNOWN	SEDIMENTARY	UNKNOWN	UNKNOWN	MUDSTONE																							1	150	30		20
D163919		USGS		Geochemistry of rock samples from the National Geochemical Database: U.S. Geological Survey, Reston, VA.	U.S. Geological Survey	USGS		42.5833	-110.583	0.01	71	71	71	UNKNOWN	SEDIMENTARY	UNKNOWN	UNKNOWN	MUDSTONE																							1.5	70	100		100	100	1000
D163920		USGS		Geochemistry of rock samples from the National Geochemical Database: U.S. Geological Survey, Reston, VA.	U.S. Geological Survey	USGS		42.5833	-110.583	0.01	71	71	71	UNKNOWN	SEDIMENTARY	UNKNOWN	UNKNOWN	MUDSTONE																							1	200	50		15				3
D163921		USGS		Geochemistry of rock samples from the National Geochemical Database: U.S. Geological Survey, Reston, VA.	U.S. Geological Survey	USGS		42.5833	-110.583	0.01	71	71	71	UNKNOWN	SEDIMENTARY	UNKNOWN	UNKNOWN	MUDSTONE																							2	150	100		100		1000
D163922		USGS		Geochemistry of rock samples from the National Geochemical Database: U.S. Geological Survey, Reston, VA.	U.S. Geological Survey	USGS		42.5833	-110.583	0.01	71	71	71	UNKNOWN	SEDIMENTARY	UNKNOWN	UNKNOWN	MUDSTONE																							1	100	30		10
D163959		USGS		Geochemistry of rock samples from the National Geochemical Database: U.S. Geological Survey, Reston, VA.	U.S. Geological Survey	USGS		44.1061	-112.303	0.01	70	69	68	UNKNOWN	SEDIMENTARY	UNKNOWN	UNKNOWN	MUDSTONE																							5	1500	50	20	30
D163963		USGS		Geochemistry of rock samples from the National Geochemical Database: U.S. Geological Survey, Reston, VA.	U.S. Geological Survey	USGS		44.1958	-112.864	0.01	70	69	68	UNKNOWN	SEDIMENTARY	UNKNOWN	UNKNOWN	MUDSTONE																							3	70	50	15	10
D163998		USGS		Geochemistry of rock samples from the National Geochemical Database: U.S. Geological Survey, Reston, VA.	U.S. Geological Survey	USGS		40.6333	-109.433	0.01	71	71	71	UNKNOWN	SEDIMENTARY	UNKNOWN	UNKNOWN	MUDSTONE																							0.7	150	30		10
D163999		USGS		Geochemistry of rock samples from the National Geochemical Database: U.S. Geological Survey, Reston, VA.	U.S. Geological Survey	USGS		40.6333	-109.433	0.01	71	71	71	UNKNOWN	SEDIMENTARY	UNKNOWN	UNKNOWN	MUDSTONE																							1	150	30		7
D164004		USGS		Geochemistry of rock samples from the National Geochemical Database: U.S. Geological Survey, Reston, VA.	U.S. Geological Survey	USGS		40.9	-109.7	0.01	71	71	71	UNKNOWN	SEDIMENTARY	UNKNOWN	UNKNOWN	MUDSTONE																							1	50	50		15
D164006		USGS		Geochemistry of rock samples from the National Geochemical Database: U.S. Geological Survey, Reston, VA.	U.S. Geological Survey	USGS		40.9	-109.7	0.01	71	71	71	UNKNOWN	SEDIMENTARY	UNKNOWN	UNKNOWN	MUDSTONE																							0.7	70	20		30
D164008		USGS		Geochemistry of rock samples from the National Geochemical Database: U.S. Geological Survey, Reston, VA.	U.S. Geological Survey	USGS		45.3333	-112.917	0.01	71	71	71	UNKNOWN	SEDIMENTARY	UNKNOWN	UNKNOWN	MUDSTONE																							5	50	100		200				7
D164009		USGS		Geochemistry of rock samples from the National Geochemical Database: U.S. Geological Survey, Reston, VA.	U.S. Geological Survey	USGS		45.3333	-112.917	0.01	71	71	71	UNKNOWN	SEDIMENTARY	UNKNOWN	UNKNOWN	MUDSTONE																							3	20	150		100				10
D164010		USGS		Geochemistry of rock samples from the National Geochemical Database: U.S. Geological Survey, Reston, VA.	U.S. Geological Survey	USGS		45.3333	-112.917	0.01	71	71	71	UNKNOWN	SEDIMENTARY	UNKNOWN	UNKNOWN	MUDSTONE																							0.3	300	100		30	100
D164011		USGS		Geochemistry of rock samples from the National Geochemical Database: U.S. Geological Survey, Reston, VA.	U.S. Geological Survey	USGS		45.3333	-112.917	0.01	71	71	71	UNKNOWN	SEDIMENTARY	UNKNOWN	UNKNOWN	MUDSTONE																							1.5	30	200		300		700		15
D164012		USGS		Geochemistry of rock samples from the National Geochemical Database: U.S. Geological Survey, Reston, VA.	U.S. Geological Survey	USGS		45.3333	-112.917	0.01	71	71	71	UNKNOWN	SEDIMENTARY	UNKNOWN	UNKNOWN	MUDSTONE																							0.7	1000	200		50	100
D164013		USGS		Geochemistry of rock samples from the National Geochemical Database: U.S. Geological Survey, Reston, VA.	U.S. Geological Survey	USGS		45.3333	-112.917	0.01	71	71	71	UNKNOWN	SEDIMENTARY	UNKNOWN	UNKNOWN	MUDSTONE																							0.7	200	50		15
D164015		USGS		Geochemistry of rock samples from the National Geochemical Database: U.S. Geological Survey, Reston, VA.	U.S. Geological Survey	USGS		45.3333	-112.917	0.01	71	71	71	UNKNOWN	SEDIMENTARY	UNKNOWN	UNKNOWN	MUDSTONE																							0.3	100	15		7
D164022		USGS		Geochemistry of rock samples from the National Geochemical Database: U.S. Geological Survey, Reston, VA.	U.S. Geological Survey	USGS		45.05	-112.017	0.01	71	71	71	UNKNOWN	SEDIMENTARY	UNKNOWN	UNKNOWN	MUDSTONE																															11
D164023		USGS		Geochemistry of rock samples from the National Geochemical Database: U.S. Geological Survey, Reston, VA.	U.S. Geological Survey	USGS		45.05	-112.017	0.01	71	71	71	UNKNOWN	SEDIMENTARY	UNKNOWN	UNKNOWN	MUDSTONE																															12
D164029		USGS		Geochemistry of rock samples from the National Geochemical Database: U.S. Geological Survey, Reston, VA.	U.S. Geological Survey	USGS		44.5667	-112.7	0.01	71	71	71	UNKNOWN	SEDIMENTARY	UNKNOWN	UNKNOWN	MUDSTONE																							1.5	150	150		100				3
D164030		USGS		Geochemistry of rock samples from the National Geochemical Database: U.S. Geological Survey, Reston, VA.	U.S. Geological Survey	USGS		44.5667	-112.7	0.01	71	71	71	UNKNOWN	SEDIMENTARY	UNKNOWN	UNKNOWN	MUDSTONE																							1.5	150	70		50				2
D164031		USGS		Geochemistry of rock samples from the National Geochemical Database: U.S. Geological Survey, Reston, VA.	U.S. Geological Survey	USGS		44.5667	-112.7	0.01	71	71	71	UNKNOWN	SEDIMENTARY	UNKNOWN	UNKNOWN	MUDSTONE																							1	300	150		100		1500		5
D164032		USGS		Geochemistry of rock samples from the National Geochemical Database: U.S. Geological Survey, Reston, VA.	U.S. Geological Survey	USGS		44.5667	-112.7	0.01	71	71	71	UNKNOWN	SEDIMENTARY	UNKNOWN	UNKNOWN	MUDSTONE																							1.5	70	150		200		700
[truncated: 4,619 more rows]
[truncated: 111 more columns]

## Sheet: References
References
AUTHOR	YEAR	TITLE	JOURNAL
[truncated: 173 more rows]
