# Supplementary material for: Basic chemical compositions combination rules and quantitative criterion of red beds
Source: Copernicus journal article supplement (doi:10.5194/egusphere-2023-2590), 2024-01-29
Supplement: Supplementary file 10 [file Supplementary Table 18-siliciclastic_EarthChem.xlsx]

## Sheet: Data
EarthChem Download: Tuesday, Apr. 24, 2018 9:22:04 pm
Search Criteria:
RockName	siliciclastic
SAMPLE ID	IGSN	SOURCE	DOI	TITLE	JOURNAL	AUTHOR	CRUISEID	LATITUDE	LONGITUDE	LOC PREC	MIN AGE	AGE	MAX AGE	METHOD	MATERIAL	TYPE	COMPOSITION	ROCK NAME	SIO2	TIO2	AL2O3	FE2O3	FE2O3T	FEO	FEOT	MGO	CAO	U238	NA2O	K2O	P2O5	MNO	LOI	H2O_MINUS	H2O	LA	CACO3	CE	PR	ND	SM	EU	GD	TB	DY	HO	ER	TM	YB
NP15/168-169		SEDDB	10.1016/S0009-2541(99)00056-X	PROVENANCE OF NORTH PACIFIC SEDIMENTS AND PROCESS OF SOURCE MATERIAL TRANSPORT AS DERIVED FROM Rb-Sr ISOTOPIC SYTEMATICS	CHEMICAL GEOLOGY	ASAHARA, Y; TANAKA, T; KAMIOKA, H; NISHIMURA, A; YAMAZAKI, T	UNKNOWN	23.9428	135.001	-1		0.354		TIMS-ID	SEDIMENTARY	UNKNOWN	UNKNOWN	SILICICLASTIC
NP15/168-169		SEDDB	10.1016/S0009-2541(99)00056-X	PROVENANCE OF NORTH PACIFIC SEDIMENTS AND PROCESS OF SOURCE MATERIAL TRANSPORT AS DERIVED FROM Rb-Sr ISOTOPIC SYTEMATICS	CHEMICAL GEOLOGY	ASAHARA, Y; TANAKA, T; KAMIOKA, H; NISHIMURA, A; YAMAZAKI, T	UNKNOWN	23.9428	135.001	-1		0.354		TIMS	SEDIMENTARY	UNKNOWN	UNKNOWN	SILICICLASTIC
NP15/248-249		SEDDB	10.1016/S0009-2541(99)00056-X	PROVENANCE OF NORTH PACIFIC SEDIMENTS AND PROCESS OF SOURCE MATERIAL TRANSPORT AS DERIVED FROM Rb-Sr ISOTOPIC SYTEMATICS	CHEMICAL GEOLOGY	ASAHARA, Y; TANAKA, T; KAMIOKA, H; NISHIMURA, A; YAMAZAKI, T	UNKNOWN	23.9428	135.001	-1		0.522		TIMS-ID	SEDIMENTARY	UNKNOWN	UNKNOWN	SILICICLASTIC
NP15/248-249		SEDDB	10.1016/S0009-2541(99)00056-X	PROVENANCE OF NORTH PACIFIC SEDIMENTS AND PROCESS OF SOURCE MATERIAL TRANSPORT AS DERIVED FROM Rb-Sr ISOTOPIC SYTEMATICS	CHEMICAL GEOLOGY	ASAHARA, Y; TANAKA, T; KAMIOKA, H; NISHIMURA, A; YAMAZAKI, T	UNKNOWN	23.9428	135.001	-1		0.522		TIMS	SEDIMENTARY	UNKNOWN	UNKNOWN	SILICICLASTIC
NP16/162-163		SEDDB	10.1016/S0009-2541(99)00056-X	PROVENANCE OF NORTH PACIFIC SEDIMENTS AND PROCESS OF SOURCE MATERIAL TRANSPORT AS DERIVED FROM Rb-Sr ISOTOPIC SYTEMATICS	CHEMICAL GEOLOGY	ASAHARA, Y; TANAKA, T; KAMIOKA, H; NISHIMURA, A; YAMAZAKI, T	UNKNOWN	19.9932	-162.494	-1		0.771		TIMS-ID	SEDIMENTARY	UNKNOWN	UNKNOWN	SILICICLASTIC
NP16/162-163		SEDDB	10.1016/S0009-2541(99)00056-X	PROVENANCE OF NORTH PACIFIC SEDIMENTS AND PROCESS OF SOURCE MATERIAL TRANSPORT AS DERIVED FROM Rb-Sr ISOTOPIC SYTEMATICS	CHEMICAL GEOLOGY	ASAHARA, Y; TANAKA, T; KAMIOKA, H; NISHIMURA, A; YAMAZAKI, T	UNKNOWN	19.9932	-162.494	-1		0.771		TIMS	SEDIMENTARY	UNKNOWN	UNKNOWN	SILICICLASTIC
NP16/442-443		SEDDB	10.1016/S0009-2541(99)00056-X	PROVENANCE OF NORTH PACIFIC SEDIMENTS AND PROCESS OF SOURCE MATERIAL TRANSPORT AS DERIVED FROM Rb-Sr ISOTOPIC SYTEMATICS	CHEMICAL GEOLOGY	ASAHARA, Y; TANAKA, T; KAMIOKA, H; NISHIMURA, A; YAMAZAKI, T	UNKNOWN	19.9932	-162.494	-1		1.531		TIMS-ID	SEDIMENTARY	UNKNOWN	UNKNOWN	SILICICLASTIC
NP16/442-443		SEDDB	10.1016/S0009-2541(99)00056-X	PROVENANCE OF NORTH PACIFIC SEDIMENTS AND PROCESS OF SOURCE MATERIAL TRANSPORT AS DERIVED FROM Rb-Sr ISOTOPIC SYTEMATICS	CHEMICAL GEOLOGY	ASAHARA, Y; TANAKA, T; KAMIOKA, H; NISHIMURA, A; YAMAZAKI, T	UNKNOWN	19.9932	-162.494	-1		1.531		TIMS	SEDIMENTARY	UNKNOWN	UNKNOWN	SILICICLASTIC
NP18/8-9		SEDDB	10.1016/S0009-2541(99)00056-X	PROVENANCE OF NORTH PACIFIC SEDIMENTS AND PROCESS OF SOURCE MATERIAL TRANSPORT AS DERIVED FROM Rb-Sr ISOTOPIC SYTEMATICS	CHEMICAL GEOLOGY	ASAHARA, Y; TANAKA, T; KAMIOKA, H; NISHIMURA, A; YAMAZAKI, T	UNKNOWN	20	-175.118	-1		0.14		TIMS-ID	SEDIMENTARY	UNKNOWN	UNKNOWN	SILICICLASTIC
NP18/8-9		SEDDB	10.1016/S0009-2541(99)00056-X	PROVENANCE OF NORTH PACIFIC SEDIMENTS AND PROCESS OF SOURCE MATERIAL TRANSPORT AS DERIVED FROM Rb-Sr ISOTOPIC SYTEMATICS	CHEMICAL GEOLOGY	ASAHARA, Y; TANAKA, T; KAMIOKA, H; NISHIMURA, A; YAMAZAKI, T	UNKNOWN	20	-175.118	-1		0.14		TIMS	SEDIMENTARY	UNKNOWN	UNKNOWN	SILICICLASTIC
NP18/48-49		SEDDB	10.1016/S0009-2541(99)00056-X	PROVENANCE OF NORTH PACIFIC SEDIMENTS AND PROCESS OF SOURCE MATERIAL TRANSPORT AS DERIVED FROM Rb-Sr ISOTOPIC SYTEMATICS	CHEMICAL GEOLOGY	ASAHARA, Y; TANAKA, T; KAMIOKA, H; NISHIMURA, A; YAMAZAKI, T	UNKNOWN	20	-175.118	-1		0.83		TIMS-ID	SEDIMENTARY	UNKNOWN	UNKNOWN	SILICICLASTIC
NP18/48-49		SEDDB	10.1016/S0009-2541(99)00056-X	PROVENANCE OF NORTH PACIFIC SEDIMENTS AND PROCESS OF SOURCE MATERIAL TRANSPORT AS DERIVED FROM Rb-Sr ISOTOPIC SYTEMATICS	CHEMICAL GEOLOGY	ASAHARA, Y; TANAKA, T; KAMIOKA, H; NISHIMURA, A; YAMAZAKI, T	UNKNOWN	20	-175.118	-1		0.83		TIMS	SEDIMENTARY	UNKNOWN	UNKNOWN	SILICICLASTIC
NP27/40-41		SEDDB	10.1016/S0009-2541(99)00056-X	PROVENANCE OF NORTH PACIFIC SEDIMENTS AND PROCESS OF SOURCE MATERIAL TRANSPORT AS DERIVED FROM Rb-Sr ISOTOPIC SYTEMATICS	CHEMICAL GEOLOGY	ASAHARA, Y; TANAKA, T; KAMIOKA, H; NISHIMURA, A; YAMAZAKI, T	UNKNOWN	19.998	158.498	-1		1.937		TIMS-ID	SEDIMENTARY	UNKNOWN	UNKNOWN	SILICICLASTIC
NP27/40-41		SEDDB	10.1016/S0009-2541(99)00056-X	PROVENANCE OF NORTH PACIFIC SEDIMENTS AND PROCESS OF SOURCE MATERIAL TRANSPORT AS DERIVED FROM Rb-Sr ISOTOPIC SYTEMATICS	CHEMICAL GEOLOGY	ASAHARA, Y; TANAKA, T; KAMIOKA, H; NISHIMURA, A; YAMAZAKI, T	UNKNOWN	19.998	158.498	-1		1.937		TIMS	SEDIMENTARY	UNKNOWN	UNKNOWN	SILICICLASTIC
NP29/4-5		SEDDB	10.1016/S0009-2541(99)00056-X	PROVENANCE OF NORTH PACIFIC SEDIMENTS AND PROCESS OF SOURCE MATERIAL TRANSPORT AS DERIVED FROM Rb-Sr ISOTOPIC SYTEMATICS	CHEMICAL GEOLOGY	ASAHARA, Y; TANAKA, T; KAMIOKA, H; NISHIMURA, A; YAMAZAKI, T	UNKNOWN	19.9987	153.482	-1		0.12		TIMS-ID	SEDIMENTARY	UNKNOWN	UNKNOWN	SILICICLASTIC
NP29/4-5		SEDDB	10.1016/S0009-2541(99)00056-X	PROVENANCE OF NORTH PACIFIC SEDIMENTS AND PROCESS OF SOURCE MATERIAL TRANSPORT AS DERIVED FROM Rb-Sr ISOTOPIC SYTEMATICS	CHEMICAL GEOLOGY	ASAHARA, Y; TANAKA, T; KAMIOKA, H; NISHIMURA, A; YAMAZAKI, T	UNKNOWN	19.9987	153.482	-1		0.12		TIMS	SEDIMENTARY	UNKNOWN	UNKNOWN	SILICICLASTIC
NGC47/42-43		SEDDB	10.1016/S0009-2541(99)00056-X	PROVENANCE OF NORTH PACIFIC SEDIMENTS AND PROCESS OF SOURCE MATERIAL TRANSPORT AS DERIVED FROM Rb-Sr ISOTOPIC SYTEMATICS	CHEMICAL GEOLOGY	ASAHARA, Y; TANAKA, T; KAMIOKA, H; NISHIMURA, A; YAMAZAKI, T	UNKNOWN	7.929	174.999	-1		0.404		TIMS-ID	SEDIMENTARY	UNKNOWN	UNKNOWN	SILICICLASTIC
NGC47/42-43		SEDDB	10.1016/S0009-2541(99)00056-X	PROVENANCE OF NORTH PACIFIC SEDIMENTS AND PROCESS OF SOURCE MATERIAL TRANSPORT AS DERIVED FROM Rb-Sr ISOTOPIC SYTEMATICS	CHEMICAL GEOLOGY	ASAHARA, Y; TANAKA, T; KAMIOKA, H; NISHIMURA, A; YAMAZAKI, T	UNKNOWN	7.929	174.999	-1		0.404		TIMS	SEDIMENTARY	UNKNOWN	UNKNOWN	SILICICLASTIC
NGC47/472-473		SEDDB	10.1016/S0009-2541(99)00056-X	PROVENANCE OF NORTH PACIFIC SEDIMENTS AND PROCESS OF SOURCE MATERIAL TRANSPORT AS DERIVED FROM Rb-Sr ISOTOPIC SYTEMATICS	CHEMICAL GEOLOGY	ASAHARA, Y; TANAKA, T; KAMIOKA, H; NISHIMURA, A; YAMAZAKI, T	UNKNOWN	7.929	174.999	-1		3.747		TIMS-ID	SEDIMENTARY	UNKNOWN	UNKNOWN	SILICICLASTIC
NGC47/472-473		SEDDB	10.1016/S0009-2541(99)00056-X	PROVENANCE OF NORTH PACIFIC SEDIMENTS AND PROCESS OF SOURCE MATERIAL TRANSPORT AS DERIVED FROM Rb-Sr ISOTOPIC SYTEMATICS	CHEMICAL GEOLOGY	ASAHARA, Y; TANAKA, T; KAMIOKA, H; NISHIMURA, A; YAMAZAKI, T	UNKNOWN	7.929	174.999	-1		3.747		TIMS	SEDIMENTARY	UNKNOWN	UNKNOWN	SILICICLASTIC
HAKGH93-1/8-9		SEDDB	10.1016/S0009-2541(99)00056-X	PROVENANCE OF NORTH PACIFIC SEDIMENTS AND PROCESS OF SOURCE MATERIAL TRANSPORT AS DERIVED FROM Rb-Sr ISOTOPIC SYTEMATICS	CHEMICAL GEOLOGY	ASAHARA, Y; TANAKA, T; KAMIOKA, H; NISHIMURA, A; YAMAZAKI, T	GH93	24.0023	175.109	-1		0.062		TIMS-ID	SEDIMENTARY	UNKNOWN	UNKNOWN	SILICICLASTIC
HAKGH93-1/8-9		SEDDB	10.1016/S0009-2541(99)00056-X	PROVENANCE OF NORTH PACIFIC SEDIMENTS AND PROCESS OF SOURCE MATERIAL TRANSPORT AS DERIVED FROM Rb-Sr ISOTOPIC SYTEMATICS	CHEMICAL GEOLOGY	ASAHARA, Y; TANAKA, T; KAMIOKA, H; NISHIMURA, A; YAMAZAKI, T	GH93	24.0023	175.109	-1		0.062		TIMS	SEDIMENTARY	UNKNOWN	UNKNOWN	SILICICLASTIC
HAKGH93-1/58-59		SEDDB	10.1016/S0009-2541(99)00056-X	PROVENANCE OF NORTH PACIFIC SEDIMENTS AND PROCESS OF SOURCE MATERIAL TRANSPORT AS DERIVED FROM Rb-Sr ISOTOPIC SYTEMATICS	CHEMICAL GEOLOGY	ASAHARA, Y; TANAKA, T; KAMIOKA, H; NISHIMURA, A; YAMAZAKI, T	GH93	24.0023	175.109	-1		0.426		TIMS-ID	SEDIMENTARY	UNKNOWN	UNKNOWN	SILICICLASTIC
HAKGH93-1/58-59		SEDDB	10.1016/S0009-2541(99)00056-X	PROVENANCE OF NORTH PACIFIC SEDIMENTS AND PROCESS OF SOURCE MATERIAL TRANSPORT AS DERIVED FROM Rb-Sr ISOTOPIC SYTEMATICS	CHEMICAL GEOLOGY	ASAHARA, Y; TANAKA, T; KAMIOKA, H; NISHIMURA, A; YAMAZAKI, T	GH93	24.0023	175.109	-1		0.426		TIMS	SEDIMENTARY	UNKNOWN	UNKNOWN	SILICICLASTIC
P75/30-31		SEDDB	10.1016/S0009-2541(99)00056-X	PROVENANCE OF NORTH PACIFIC SEDIMENTS AND PROCESS OF SOURCE MATERIAL TRANSPORT AS DERIVED FROM Rb-Sr ISOTOPIC SYTEMATICS	CHEMICAL GEOLOGY	ASAHARA, Y; TANAKA, T; KAMIOKA, H; NISHIMURA, A; YAMAZAKI, T	UNKNOWN	36.7117	143.217	-1	0		1.806	TIMS-ID	SEDIMENTARY	UNKNOWN	UNKNOWN	SILICICLASTIC
P75/30-31		SEDDB	10.1016/S0009-2541(99)00056-X	PROVENANCE OF NORTH PACIFIC SEDIMENTS AND PROCESS OF SOURCE MATERIAL TRANSPORT AS DERIVED FROM Rb-Sr ISOTOPIC SYTEMATICS	CHEMICAL GEOLOGY	ASAHARA, Y; TANAKA, T; KAMIOKA, H; NISHIMURA, A; YAMAZAKI, T	UNKNOWN	36.7117	143.217	-1	0		1.806	TIMS	SEDIMENTARY	UNKNOWN	UNKNOWN	SILICICLASTIC
P75/355-356		SEDDB	10.1016/S0009-2541(99)00056-X	PROVENANCE OF NORTH PACIFIC SEDIMENTS AND PROCESS OF SOURCE MATERIAL TRANSPORT AS DERIVED FROM Rb-Sr ISOTOPIC SYTEMATICS	CHEMICAL GEOLOGY	ASAHARA, Y; TANAKA, T; KAMIOKA, H; NISHIMURA, A; YAMAZAKI, T	UNKNOWN	36.7117	143.217	-1	0		1.806	TIMS-ID	SEDIMENTARY	UNKNOWN	UNKNOWN	SILICICLASTIC
P75/355-356		SEDDB	10.1016/S0009-2541(99)00056-X	PROVENANCE OF NORTH PACIFIC SEDIMENTS AND PROCESS OF SOURCE MATERIAL TRANSPORT AS DERIVED FROM Rb-Sr ISOTOPIC SYTEMATICS	CHEMICAL GEOLOGY	ASAHARA, Y; TANAKA, T; KAMIOKA, H; NISHIMURA, A; YAMAZAKI, T	UNKNOWN	36.7117	143.217	-1	0		1.806	TIMS	SEDIMENTARY	UNKNOWN	UNKNOWN	SILICICLASTIC
HAKGH92-703/0-1		SEDDB	10.1016/S0009-2541(99)00056-X	PROVENANCE OF NORTH PACIFIC SEDIMENTS AND PROCESS OF SOURCE MATERIAL TRANSPORT AS DERIVED FROM Rb-Sr ISOTOPIC SYTEMATICS	CHEMICAL GEOLOGY	ASAHARA, Y; TANAKA, T; KAMIOKA, H; NISHIMURA, A; YAMAZAKI, T	GH92	39.494	136.5	-1	0		1.806	TIMS-ID	SEDIMENTARY	UNKNOWN	UNKNOWN	SILICICLASTIC
HAKGH92-703/0-1		SEDDB	10.1016/S0009-2541(99)00056-X	PROVENANCE OF NORTH PACIFIC SEDIMENTS AND PROCESS OF SOURCE MATERIAL TRANSPORT AS DERIVED FROM Rb-Sr ISOTOPIC SYTEMATICS	CHEMICAL GEOLOGY	ASAHARA, Y; TANAKA, T; KAMIOKA, H; NISHIMURA, A; YAMAZAKI, T	GH92	39.494	136.5	-1	0		1.806	TIMS	SEDIMENTARY	UNKNOWN	UNKNOWN	SILICICLASTIC
HAKGH92-703/210-211		SEDDB	10.1016/S0009-2541(99)00056-X	PROVENANCE OF NORTH PACIFIC SEDIMENTS AND PROCESS OF SOURCE MATERIAL TRANSPORT AS DERIVED FROM Rb-Sr ISOTOPIC SYTEMATICS	CHEMICAL GEOLOGY	ASAHARA, Y; TANAKA, T; KAMIOKA, H; NISHIMURA, A; YAMAZAKI, T	GH92	39.494	136.5	-1	0		1.806	TIMS-ID	SEDIMENTARY	UNKNOWN	UNKNOWN	SILICICLASTIC
HAKGH92-703/210-211		SEDDB	10.1016/S0009-2541(99)00056-X	PROVENANCE OF NORTH PACIFIC SEDIMENTS AND PROCESS OF SOURCE MATERIAL TRANSPORT AS DERIVED FROM Rb-Sr ISOTOPIC SYTEMATICS	CHEMICAL GEOLOGY	ASAHARA, Y; TANAKA, T; KAMIOKA, H; NISHIMURA, A; YAMAZAKI, T	GH92	39.494	136.5	-1	0		1.806	TIMS	SEDIMENTARY	UNKNOWN	UNKNOWN	SILICICLASTIC
HAKGH92-703/510-511		SEDDB	10.1016/S0009-2541(99)00056-X	PROVENANCE OF NORTH PACIFIC SEDIMENTS AND PROCESS OF SOURCE MATERIAL TRANSPORT AS DERIVED FROM Rb-Sr ISOTOPIC SYTEMATICS	CHEMICAL GEOLOGY	ASAHARA, Y; TANAKA, T; KAMIOKA, H; NISHIMURA, A; YAMAZAKI, T	GH92	39.494	136.5	-1	0		1.806	TIMS-ID	SEDIMENTARY	UNKNOWN	UNKNOWN	SILICICLASTIC
HAKGH92-703/510-511		SEDDB	10.1016/S0009-2541(99)00056-X	PROVENANCE OF NORTH PACIFIC SEDIMENTS AND PROCESS OF SOURCE MATERIAL TRANSPORT AS DERIVED FROM Rb-Sr ISOTOPIC SYTEMATICS	CHEMICAL GEOLOGY	ASAHARA, Y; TANAKA, T; KAMIOKA, H; NISHIMURA, A; YAMAZAKI, T	GH92	39.494	136.5	-1	0		1.806	TIMS	SEDIMENTARY	UNKNOWN	UNKNOWN	SILICICLASTIC
NP15/48-49		SEDDB	10.1016/S0009-2541(99)00056-X	PROVENANCE OF NORTH PACIFIC SEDIMENTS AND PROCESS OF SOURCE MATERIAL TRANSPORT AS DERIVED FROM Rb-Sr ISOTOPIC SYTEMATICS	CHEMICAL GEOLOGY	ASAHARA, Y; TANAKA, T; KAMIOKA, H; NISHIMURA, A; YAMAZAKI, T	UNKNOWN	23.9428	135.001	-1		0.102		TIMS-ID	SEDIMENTARY	UNKNOWN	UNKNOWN	SILICICLASTIC
NP15/48-49		SEDDB	10.1016/S0009-2541(99)00056-X	PROVENANCE OF NORTH PACIFIC SEDIMENTS AND PROCESS OF SOURCE MATERIAL TRANSPORT AS DERIVED FROM Rb-Sr ISOTOPIC SYTEMATICS	CHEMICAL GEOLOGY	ASAHARA, Y; TANAKA, T; KAMIOKA, H; NISHIMURA, A; YAMAZAKI, T	UNKNOWN	23.9428	135.001	-1		0.102		TIMS	SEDIMENTARY	UNKNOWN	UNKNOWN	SILICICLASTIC
NP16/42-43		SEDDB	10.1016/S0009-2541(99)00056-X	PROVENANCE OF NORTH PACIFIC SEDIMENTS AND PROCESS OF SOURCE MATERIAL TRANSPORT AS DERIVED FROM Rb-Sr ISOTOPIC SYTEMATICS	CHEMICAL GEOLOGY	ASAHARA, Y; TANAKA, T; KAMIOKA, H; NISHIMURA, A; YAMAZAKI, T	UNKNOWN	19.9932	-162.494	-1		0.202		TIMS-ID	SEDIMENTARY	UNKNOWN	UNKNOWN	SILICICLASTIC
NP16/42-43		SEDDB	10.1016/S0009-2541(99)00056-X	PROVENANCE OF NORTH PACIFIC SEDIMENTS AND PROCESS OF SOURCE MATERIAL TRANSPORT AS DERIVED FROM Rb-Sr ISOTOPIC SYTEMATICS	CHEMICAL GEOLOGY	ASAHARA, Y; TANAKA, T; KAMIOKA, H; NISHIMURA, A; YAMAZAKI, T	UNKNOWN	19.9932	-162.494	-1		0.202		TIMS	SEDIMENTARY	UNKNOWN	UNKNOWN	SILICICLASTIC
NP16/202-203		SEDDB	10.1016/S0009-2541(99)00056-X	PROVENANCE OF NORTH PACIFIC SEDIMENTS AND PROCESS OF SOURCE MATERIAL TRANSPORT AS DERIVED FROM Rb-Sr ISOTOPIC SYTEMATICS	CHEMICAL GEOLOGY	ASAHARA, Y; TANAKA, T; KAMIOKA, H; NISHIMURA, A; YAMAZAKI, T	UNKNOWN	19.9932	-162.494	-1		0.881		TIMS-ID	SEDIMENTARY	UNKNOWN	UNKNOWN	SILICICLASTIC
NP16/202-203		SEDDB	10.1016/S0009-2541(99)00056-X	PROVENANCE OF NORTH PACIFIC SEDIMENTS AND PROCESS OF SOURCE MATERIAL TRANSPORT AS DERIVED FROM Rb-Sr ISOTOPIC SYTEMATICS	CHEMICAL GEOLOGY	ASAHARA, Y; TANAKA, T; KAMIOKA, H; NISHIMURA, A; YAMAZAKI, T	UNKNOWN	19.9932	-162.494	-1		0.881		TIMS	SEDIMENTARY	UNKNOWN	UNKNOWN	SILICICLASTIC
NP18/104-105		SEDDB	10.1016/S0009-2541(99)00056-X	PROVENANCE OF NORTH PACIFIC SEDIMENTS AND PROCESS OF SOURCE MATERIAL TRANSPORT AS DERIVED FROM Rb-Sr ISOTOPIC SYTEMATICS	CHEMICAL GEOLOGY	ASAHARA, Y; TANAKA, T; KAMIOKA, H; NISHIMURA, A; YAMAZAKI, T	UNKNOWN	20	-175.118	-1		1.92		TIMS-ID	SEDIMENTARY	UNKNOWN	UNKNOWN	SILICICLASTIC
NP18/104-105		SEDDB	10.1016/S0009-2541(99)00056-X	PROVENANCE OF NORTH PACIFIC SEDIMENTS AND PROCESS OF SOURCE MATERIAL TRANSPORT AS DERIVED FROM Rb-Sr ISOTOPIC SYTEMATICS	CHEMICAL GEOLOGY	ASAHARA, Y; TANAKA, T; KAMIOKA, H; NISHIMURA, A; YAMAZAKI, T	UNKNOWN	20	-175.118	-1		1.92		TIMS	SEDIMENTARY	UNKNOWN	UNKNOWN	SILICICLASTIC
NP18/142-143		SEDDB	10.1016/S0009-2541(99)00056-X	PROVENANCE OF NORTH PACIFIC SEDIMENTS AND PROCESS OF SOURCE MATERIAL TRANSPORT AS DERIVED FROM Rb-Sr ISOTOPIC SYTEMATICS	CHEMICAL GEOLOGY	ASAHARA, Y; TANAKA, T; KAMIOKA, H; NISHIMURA, A; YAMAZAKI, T	UNKNOWN	20	-175.118	-1		2.609		TIMS-ID	SEDIMENTARY	UNKNOWN	UNKNOWN	SILICICLASTIC
NP18/142-143		SEDDB	10.1016/S0009-2541(99)00056-X	PROVENANCE OF NORTH PACIFIC SEDIMENTS AND PROCESS OF SOURCE MATERIAL TRANSPORT AS DERIVED FROM Rb-Sr ISOTOPIC SYTEMATICS	CHEMICAL GEOLOGY	ASAHARA, Y; TANAKA, T; KAMIOKA, H; NISHIMURA, A; YAMAZAKI, T	UNKNOWN	20	-175.118	-1		2.609		TIMS	SEDIMENTARY	UNKNOWN	UNKNOWN	SILICICLASTIC
NP27/280-281		SEDDB	10.1016/S0009-2541(99)00056-X	PROVENANCE OF NORTH PACIFIC SEDIMENTS AND PROCESS OF SOURCE MATERIAL TRANSPORT AS DERIVED FROM Rb-Sr ISOTOPIC SYTEMATICS	CHEMICAL GEOLOGY	ASAHARA, Y; TANAKA, T; KAMIOKA, H; NISHIMURA, A; YAMAZAKI, T	UNKNOWN	19.998	158.498	-1		3.8		TIMS-ID	SEDIMENTARY	UNKNOWN	UNKNOWN	SILICICLASTIC
NP27/280-281		SEDDB	10.1016/S0009-2541(99)00056-X	PROVENANCE OF NORTH PACIFIC SEDIMENTS AND PROCESS OF SOURCE MATERIAL TRANSPORT AS DERIVED FROM Rb-Sr ISOTOPIC SYTEMATICS	CHEMICAL GEOLOGY	ASAHARA, Y; TANAKA, T; KAMIOKA, H; NISHIMURA, A; YAMAZAKI, T	UNKNOWN	19.998	158.498	-1		3.8		TIMS	SEDIMENTARY	UNKNOWN	UNKNOWN	SILICICLASTIC
NP27/480-481		SEDDB	10.1016/S0009-2541(99)00056-X	PROVENANCE OF NORTH PACIFIC SEDIMENTS AND PROCESS OF SOURCE MATERIAL TRANSPORT AS DERIVED FROM Rb-Sr ISOTOPIC SYTEMATICS	CHEMICAL GEOLOGY	ASAHARA, Y; TANAKA, T; KAMIOKA, H; NISHIMURA, A; YAMAZAKI, T	UNKNOWN	19.998	158.498	-1		5.4		TIMS-ID	SEDIMENTARY	UNKNOWN	UNKNOWN	SILICICLASTIC
NP27/480-481		SEDDB	10.1016/S0009-2541(99)00056-X	PROVENANCE OF NORTH PACIFIC SEDIMENTS AND PROCESS OF SOURCE MATERIAL TRANSPORT AS DERIVED FROM Rb-Sr ISOTOPIC SYTEMATICS	CHEMICAL GEOLOGY	ASAHARA, Y; TANAKA, T; KAMIOKA, H; NISHIMURA, A; YAMAZAKI, T	UNKNOWN	19.998	158.498	-1		5.4		TIMS	SEDIMENTARY	UNKNOWN	UNKNOWN	SILICICLASTIC
NP27/520-521		SEDDB	10.1016/S0009-2541(99)00056-X	PROVENANCE OF NORTH PACIFIC SEDIMENTS AND PROCESS OF SOURCE MATERIAL TRANSPORT AS DERIVED FROM Rb-Sr ISOTOPIC SYTEMATICS	CHEMICAL GEOLOGY	ASAHARA, Y; TANAKA, T; KAMIOKA, H; NISHIMURA, A; YAMAZAKI, T	UNKNOWN	19.998	158.498	-1		5.7		TIMS-ID	SEDIMENTARY	UNKNOWN	UNKNOWN	SILICICLASTIC
NP27/520-521		SEDDB	10.1016/S0009-2541(99)00056-X	PROVENANCE OF NORTH PACIFIC SEDIMENTS AND PROCESS OF SOURCE MATERIAL TRANSPORT AS DERIVED FROM Rb-Sr ISOTOPIC SYTEMATICS	CHEMICAL GEOLOGY	ASAHARA, Y; TANAKA, T; KAMIOKA, H; NISHIMURA, A; YAMAZAKI, T	UNKNOWN	19.998	158.498	-1		5.7		TIMS	SEDIMENTARY	UNKNOWN	UNKNOWN	SILICICLASTIC
NP29/78-79		SEDDB	10.1016/S0009-2541(99)00056-X	PROVENANCE OF NORTH PACIFIC SEDIMENTS AND PROCESS OF SOURCE MATERIAL TRANSPORT AS DERIVED FROM Rb-Sr ISOTOPIC SYTEMATICS	CHEMICAL GEOLOGY	ASAHARA, Y; TANAKA, T; KAMIOKA, H; NISHIMURA, A; YAMAZAKI, T	UNKNOWN	19.9987	153.482	-1		1.521		TIMS-ID	SEDIMENTARY	UNKNOWN	UNKNOWN	SILICICLASTIC
NP29/78-79		SEDDB	10.1016/S0009-2541(99)00056-X	PROVENANCE OF NORTH PACIFIC SEDIMENTS AND PROCESS OF SOURCE MATERIAL TRANSPORT AS DERIVED FROM Rb-Sr ISOTOPIC SYTEMATICS	CHEMICAL GEOLOGY	ASAHARA, Y; TANAKA, T; KAMIOKA, H; NISHIMURA, A; YAMAZAKI, T	UNKNOWN	19.9987	153.482	-1		1.521		TIMS	SEDIMENTARY	UNKNOWN	UNKNOWN	SILICICLASTIC
NP29/88-89		SEDDB	10.1016/S0009-2541(99)00056-X	PROVENANCE OF NORTH PACIFIC SEDIMENTS AND PROCESS OF SOURCE MATERIAL TRANSPORT AS DERIVED FROM Rb-Sr ISOTOPIC SYTEMATICS	CHEMICAL GEOLOGY	ASAHARA, Y; TANAKA, T; KAMIOKA, H; NISHIMURA, A; YAMAZAKI, T	UNKNOWN	19.9987	153.482	-1		1.659		TIMS-ID	SEDIMENTARY	UNKNOWN	UNKNOWN	SILICICLASTIC
NP29/88-89		SEDDB	10.1016/S0009-2541(99)00056-X	PROVENANCE OF NORTH PACIFIC SEDIMENTS AND PROCESS OF SOURCE MATERIAL TRANSPORT AS DERIVED FROM Rb-Sr ISOTOPIC SYTEMATICS	CHEMICAL GEOLOGY	ASAHARA, Y; TANAKA, T; KAMIOKA, H; NISHIMURA, A; YAMAZAKI, T	UNKNOWN	19.9987	153.482	-1		1.659		TIMS	SEDIMENTARY	UNKNOWN	UNKNOWN	SILICICLASTIC
NP29/216-217		SEDDB	10.1016/S0009-2541(99)00056-X	PROVENANCE OF NORTH PACIFIC SEDIMENTS AND PROCESS OF SOURCE MATERIAL TRANSPORT AS DERIVED FROM Rb-Sr ISOTOPIC SYTEMATICS	CHEMICAL GEOLOGY	ASAHARA, Y; TANAKA, T; KAMIOKA, H; NISHIMURA, A; YAMAZAKI, T	UNKNOWN	19.9987	153.482	-1		2.854		TIMS-ID	SEDIMENTARY	UNKNOWN	UNKNOWN	SILICICLASTIC
NP29/216-217		SEDDB	10.1016/S0009-2541(99)00056-X	PROVENANCE OF NORTH PACIFIC SEDIMENTS AND PROCESS OF SOURCE MATERIAL TRANSPORT AS DERIVED FROM Rb-Sr ISOTOPIC SYTEMATICS	CHEMICAL GEOLOGY	ASAHARA, Y; TANAKA, T; KAMIOKA, H; NISHIMURA, A; YAMAZAKI, T	UNKNOWN	19.9987	153.482	-1		2.854		TIMS	SEDIMENTARY	UNKNOWN	UNKNOWN	SILICICLASTIC
HAKGH93-1/5-6		SEDDB	10.1016/S0009-2541(99)00056-X	PROVENANCE OF NORTH PACIFIC SEDIMENTS AND PROCESS OF SOURCE MATERIAL TRANSPORT AS DERIVED FROM Rb-Sr ISOTOPIC SYTEMATICS	CHEMICAL GEOLOGY	ASAHARA, Y; TANAKA, T; KAMIOKA, H; NISHIMURA, A; YAMAZAKI, T	GH93	24.0023	175.109	-1		0.04		TIMS-ID	SEDIMENTARY	UNKNOWN	UNKNOWN	SILICICLASTIC
HAKGH93-1/5-6		SEDDB	10.1016/S0009-2541(99)00056-X	PROVENANCE OF NORTH PACIFIC SEDIMENTS AND PROCESS OF SOURCE MATERIAL TRANSPORT AS DERIVED FROM Rb-Sr ISOTOPIC SYTEMATICS	CHEMICAL GEOLOGY	ASAHARA, Y; TANAKA, T; KAMIOKA, H; NISHIMURA, A; YAMAZAKI, T	GH93	24.0023	175.109	-1		0.04		TIMS	SEDIMENTARY	UNKNOWN	UNKNOWN	SILICICLASTIC
P75/5-6		SEDDB	10.1016/S0009-2541(99)00056-X	PROVENANCE OF NORTH PACIFIC SEDIMENTS AND PROCESS OF SOURCE MATERIAL TRANSPORT AS DERIVED FROM Rb-Sr ISOTOPIC SYTEMATICS	CHEMICAL GEOLOGY	ASAHARA, Y; TANAKA, T; KAMIOKA, H; NISHIMURA, A; YAMAZAKI, T	UNKNOWN	36.7117	143.217	-1	0		1.806	TIMS-ID	SEDIMENTARY	UNKNOWN	UNKNOWN	SILICICLASTIC
P75/5-6		SEDDB	10.1016/S0009-2541(99)00056-X	PROVENANCE OF NORTH PACIFIC SEDIMENTS AND PROCESS OF SOURCE MATERIAL TRANSPORT AS DERIVED FROM Rb-Sr ISOTOPIC SYTEMATICS	CHEMICAL GEOLOGY	ASAHARA, Y; TANAKA, T; KAMIOKA, H; NISHIMURA, A; YAMAZAKI, T	UNKNOWN	36.7117	143.217	-1	0		1.806	TIMS	SEDIMENTARY	UNKNOWN	UNKNOWN	SILICICLASTIC
P75/135-136		SEDDB	10.1016/S0009-2541(99)00056-X	PROVENANCE OF NORTH PACIFIC SEDIMENTS AND PROCESS OF SOURCE MATERIAL TRANSPORT AS DERIVED FROM Rb-Sr ISOTOPIC SYTEMATICS	CHEMICAL GEOLOGY	ASAHARA, Y; TANAKA, T; KAMIOKA, H; NISHIMURA, A; YAMAZAKI, T	UNKNOWN	36.7117	143.217	-1	0		1.806	TIMS-ID	SEDIMENTARY	UNKNOWN	UNKNOWN	SILICICLASTIC
P75/135-136		SEDDB	10.1016/S0009-2541(99)00056-X	PROVENANCE OF NORTH PACIFIC SEDIMENTS AND PROCESS OF SOURCE MATERIAL TRANSPORT AS DERIVED FROM Rb-Sr ISOTOPIC SYTEMATICS	CHEMICAL GEOLOGY	ASAHARA, Y; TANAKA, T; KAMIOKA, H; NISHIMURA, A; YAMAZAKI, T	UNKNOWN	36.7117	143.217	-1	0		1.806	TIMS	SEDIMENTARY	UNKNOWN	UNKNOWN	SILICICLASTIC
P75/150-151		SEDDB	10.1016/S0009-2541(99)00056-X	PROVENANCE OF NORTH PACIFIC SEDIMENTS AND PROCESS OF SOURCE MATERIAL TRANSPORT AS DERIVED FROM Rb-Sr ISOTOPIC SYTEMATICS	CHEMICAL GEOLOGY	ASAHARA, Y; TANAKA, T; KAMIOKA, H; NISHIMURA, A; YAMAZAKI, T	UNKNOWN	36.7117	143.217	-1	0		1.806	TIMS-ID	SEDIMENTARY	UNKNOWN	UNKNOWN	SILICICLASTIC
P75/150-151		SEDDB	10.1016/S0009-2541(99)00056-X	PROVENANCE OF NORTH PACIFIC SEDIMENTS AND PROCESS OF SOURCE MATERIAL TRANSPORT AS DERIVED FROM Rb-Sr ISOTOPIC SYTEMATICS	CHEMICAL GEOLOGY	ASAHARA, Y; TANAKA, T; KAMIOKA, H; NISHIMURA, A; YAMAZAKI, T	UNKNOWN	36.7117	143.217	-1	0		1.806	TIMS	SEDIMENTARY	UNKNOWN	UNKNOWN	SILICICLASTIC
P75/430-431		SEDDB	10.1016/S0009-2541(99)00056-X	PROVENANCE OF NORTH PACIFIC SEDIMENTS AND PROCESS OF SOURCE MATERIAL TRANSPORT AS DERIVED FROM Rb-Sr ISOTOPIC SYTEMATICS	CHEMICAL GEOLOGY	ASAHARA, Y; TANAKA, T; KAMIOKA, H; NISHIMURA, A; YAMAZAKI, T	UNKNOWN	36.7117	143.217	-1	0		1.806	TIMS-ID	SEDIMENTARY	UNKNOWN	UNKNOWN	SILICICLASTIC
P75/430-431		SEDDB	10.1016/S0009-2541(99)00056-X	PROVENANCE OF NORTH PACIFIC SEDIMENTS AND PROCESS OF SOURCE MATERIAL TRANSPORT AS DERIVED FROM Rb-Sr ISOTOPIC SYTEMATICS	CHEMICAL GEOLOGY	ASAHARA, Y; TANAKA, T; KAMIOKA, H; NISHIMURA, A; YAMAZAKI, T	UNKNOWN	36.7117	143.217	-1	0		1.806	TIMS	SEDIMENTARY	UNKNOWN	UNKNOWN	SILICICLASTIC
HAKGH92-703/90-91		SEDDB	10.1016/S0009-2541(99)00056-X	PROVENANCE OF NORTH PACIFIC SEDIMENTS AND PROCESS OF SOURCE MATERIAL TRANSPORT AS DERIVED FROM Rb-Sr ISOTOPIC SYTEMATICS	CHEMICAL GEOLOGY	ASAHARA, Y; TANAKA, T; KAMIOKA, H; NISHIMURA, A; YAMAZAKI, T	GH92	39.494	136.5	-1	0		1.806	TIMS-ID	SEDIMENTARY	UNKNOWN	UNKNOWN	SILICICLASTIC
HAKGH92-703/90-91		SEDDB	10.1016/S0009-2541(99)00056-X	PROVENANCE OF NORTH PACIFIC SEDIMENTS AND PROCESS OF SOURCE MATERIAL TRANSPORT AS DERIVED FROM Rb-Sr ISOTOPIC SYTEMATICS	CHEMICAL GEOLOGY	ASAHARA, Y; TANAKA, T; KAMIOKA, H; NISHIMURA, A; YAMAZAKI, T	GH92	39.494	136.5	-1	0		1.806	TIMS	SEDIMENTARY	UNKNOWN	UNKNOWN	SILICICLASTIC
HAKGH92-703/150-151		SEDDB	10.1016/S0009-2541(99)00056-X	PROVENANCE OF NORTH PACIFIC SEDIMENTS AND PROCESS OF SOURCE MATERIAL TRANSPORT AS DERIVED FROM Rb-Sr ISOTOPIC SYTEMATICS	CHEMICAL GEOLOGY	ASAHARA, Y; TANAKA, T; KAMIOKA, H; NISHIMURA, A; YAMAZAKI, T	GH92	39.494	136.5	-1	0		1.806	TIMS-ID	SEDIMENTARY	UNKNOWN	UNKNOWN	SILICICLASTIC
HAKGH92-703/150-151		SEDDB	10.1016/S0009-2541(99)00056-X	PROVENANCE OF NORTH PACIFIC SEDIMENTS AND PROCESS OF SOURCE MATERIAL TRANSPORT AS DERIVED FROM Rb-Sr ISOTOPIC SYTEMATICS	CHEMICAL GEOLOGY	ASAHARA, Y; TANAKA, T; KAMIOKA, H; NISHIMURA, A; YAMAZAKI, T	GH92	39.494	136.5	-1	0		1.806	TIMS	SEDIMENTARY	UNKNOWN	UNKNOWN	SILICICLASTIC
HAKGH92-703/450-451		SEDDB	10.1016/S0009-2541(99)00056-X	PROVENANCE OF NORTH PACIFIC SEDIMENTS AND PROCESS OF SOURCE MATERIAL TRANSPORT AS DERIVED FROM Rb-Sr ISOTOPIC SYTEMATICS	CHEMICAL GEOLOGY	ASAHARA, Y; TANAKA, T; KAMIOKA, H; NISHIMURA, A; YAMAZAKI, T	GH92	39.494	136.5	-1	0		1.806	TIMS-ID	SEDIMENTARY	UNKNOWN	UNKNOWN	SILICICLASTIC
HAKGH92-703/450-451		SEDDB	10.1016/S0009-2541(99)00056-X	PROVENANCE OF NORTH PACIFIC SEDIMENTS AND PROCESS OF SOURCE MATERIAL TRANSPORT AS DERIVED FROM Rb-Sr ISOTOPIC SYTEMATICS	CHEMICAL GEOLOGY	ASAHARA, Y; TANAKA, T; KAMIOKA, H; NISHIMURA, A; YAMAZAKI, T	GH92	39.494	136.5	-1	0		1.806	TIMS	SEDIMENTARY	UNKNOWN	UNKNOWN	SILICICLASTIC
NP15/8-9		SEDDB	10.1016/S0009-2541(99)00056-X	PROVENANCE OF NORTH PACIFIC SEDIMENTS AND PROCESS OF SOURCE MATERIAL TRANSPORT AS DERIVED FROM Rb-Sr ISOTOPIC SYTEMATICS	CHEMICAL GEOLOGY	ASAHARA, Y; TANAKA, T; KAMIOKA, H; NISHIMURA, A; YAMAZAKI, T	UNKNOWN	23.9428	135.001	-1		0.018		TIMS-ID	SEDIMENTARY	UNKNOWN	UNKNOWN	SILICICLASTIC
NP15/8-9		SEDDB	10.1016/S0009-2541(99)00056-X	PROVENANCE OF NORTH PACIFIC SEDIMENTS AND PROCESS OF SOURCE MATERIAL TRANSPORT AS DERIVED FROM Rb-Sr ISOTOPIC SYTEMATICS	CHEMICAL GEOLOGY	ASAHARA, Y; TANAKA, T; KAMIOKA, H; NISHIMURA, A; YAMAZAKI, T	UNKNOWN	23.9428	135.001	-1		0.018		TIMS	SEDIMENTARY	UNKNOWN	UNKNOWN	SILICICLASTIC
NP15/491.5-492.5		SEDDB	10.1016/S0009-2541(99)00056-X	PROVENANCE OF NORTH PACIFIC SEDIMENTS AND PROCESS OF SOURCE MATERIAL TRANSPORT AS DERIVED FROM Rb-Sr ISOTOPIC SYTEMATICS	CHEMICAL GEOLOGY	ASAHARA, Y; TANAKA, T; KAMIOKA, H; NISHIMURA, A; YAMAZAKI, T	UNKNOWN	23.9428	135.001	-1		0.987		TIMS-ID	SEDIMENTARY	UNKNOWN	UNKNOWN	SILICICLASTIC
NP15/491.5-492.5		SEDDB	10.1016/S0009-2541(99)00056-X	PROVENANCE OF NORTH PACIFIC SEDIMENTS AND PROCESS OF SOURCE MATERIAL TRANSPORT AS DERIVED FROM Rb-Sr ISOTOPIC SYTEMATICS	CHEMICAL GEOLOGY	ASAHARA, Y; TANAKA, T; KAMIOKA, H; NISHIMURA, A; YAMAZAKI, T	UNKNOWN	23.9428	135.001	-1		0.987		TIMS	SEDIMENTARY	UNKNOWN	UNKNOWN	SILICICLASTIC
NP15/692.5-693.5		SEDDB	10.1016/S0009-2541(99)00056-X	PROVENANCE OF NORTH PACIFIC SEDIMENTS AND PROCESS OF SOURCE MATERIAL TRANSPORT AS DERIVED FROM Rb-Sr ISOTOPIC SYTEMATICS	CHEMICAL GEOLOGY	ASAHARA, Y; TANAKA, T; KAMIOKA, H; NISHIMURA, A; YAMAZAKI, T	UNKNOWN	23.9428	135.001	-1		1.357		TIMS-ID	SEDIMENTARY	UNKNOWN	UNKNOWN	SILICICLASTIC
NP15/692.5-693.5		SEDDB	10.1016/S0009-2541(99)00056-X	PROVENANCE OF NORTH PACIFIC SEDIMENTS AND PROCESS OF SOURCE MATERIAL TRANSPORT AS DERIVED FROM Rb-Sr ISOTOPIC SYTEMATICS	CHEMICAL GEOLOGY	ASAHARA, Y; TANAKA, T; KAMIOKA, H; NISHIMURA, A; YAMAZAKI, T	UNKNOWN	23.9428	135.001	-1		1.357		TIMS	SEDIMENTARY	UNKNOWN	UNKNOWN	SILICICLASTIC
NP16/82-83		SEDDB	10.1016/S0009-2541(99)00056-X	PROVENANCE OF NORTH PACIFIC SEDIMENTS AND PROCESS OF SOURCE MATERIAL TRANSPORT AS DERIVED FROM Rb-Sr ISOTOPIC SYTEMATICS	CHEMICAL GEOLOGY	ASAHARA, Y; TANAKA, T; KAMIOKA, H; NISHIMURA, A; YAMAZAKI, T	UNKNOWN	19.9932	-162.494	-1		0.391		TIMS-ID	SEDIMENTARY	UNKNOWN	UNKNOWN	SILICICLASTIC
NP16/82-83		SEDDB	10.1016/S0009-2541(99)00056-X	PROVENANCE OF NORTH PACIFIC SEDIMENTS AND PROCESS OF SOURCE MATERIAL TRANSPORT AS DERIVED FROM Rb-Sr ISOTOPIC SYTEMATICS	CHEMICAL GEOLOGY	ASAHARA, Y; TANAKA, T; KAMIOKA, H; NISHIMURA, A; YAMAZAKI, T	UNKNOWN	19.9932	-162.494	-1		0.391		TIMS	SEDIMENTARY	UNKNOWN	UNKNOWN	SILICICLASTIC
NP16/322-323		SEDDB	10.1016/S0009-2541(99)00056-X	PROVENANCE OF NORTH PACIFIC SEDIMENTS AND PROCESS OF SOURCE MATERIAL TRANSPORT AS DERIVED FROM Rb-Sr ISOTOPIC SYTEMATICS	CHEMICAL GEOLOGY	ASAHARA, Y; TANAKA, T; KAMIOKA, H; NISHIMURA, A; YAMAZAKI, T	UNKNOWN	19.9932	-162.494	-1		1.231		TIMS-ID	SEDIMENTARY	UNKNOWN	UNKNOWN	SILICICLASTIC
NP16/322-323		SEDDB	10.1016/S0009-2541(99)00056-X	PROVENANCE OF NORTH PACIFIC SEDIMENTS AND PROCESS OF SOURCE MATERIAL TRANSPORT AS DERIVED FROM Rb-Sr ISOTOPIC SYTEMATICS	CHEMICAL GEOLOGY	ASAHARA, Y; TANAKA, T; KAMIOKA, H; NISHIMURA, A; YAMAZAKI, T	UNKNOWN	19.9932	-162.494	-1		1.231		TIMS	SEDIMENTARY	UNKNOWN	UNKNOWN	SILICICLASTIC
NP16/362-363		SEDDB	10.1016/S0009-2541(99)00056-X	PROVENANCE OF NORTH PACIFIC SEDIMENTS AND PROCESS OF SOURCE MATERIAL TRANSPORT AS DERIVED FROM Rb-Sr ISOTOPIC SYTEMATICS	CHEMICAL GEOLOGY	ASAHARA, Y; TANAKA, T; KAMIOKA, H; NISHIMURA, A; YAMAZAKI, T	UNKNOWN	19.9932	-162.494	-1		1.331		TIMS-ID	SEDIMENTARY	UNKNOWN	UNKNOWN	SILICICLASTIC
NP16/362-363		SEDDB	10.1016/S0009-2541(99)00056-X	PROVENANCE OF NORTH PACIFIC SEDIMENTS AND PROCESS OF SOURCE MATERIAL TRANSPORT AS DERIVED FROM Rb-Sr ISOTOPIC SYTEMATICS	CHEMICAL GEOLOGY	ASAHARA, Y; TANAKA, T; KAMIOKA, H; NISHIMURA, A; YAMAZAKI, T	UNKNOWN	19.9932	-162.494	-1		1.331		TIMS	SEDIMENTARY	UNKNOWN	UNKNOWN	SILICICLASTIC
NP27/160-161		SEDDB	10.1016/S0009-2541(99)00056-X	PROVENANCE OF NORTH PACIFIC SEDIMENTS AND PROCESS OF SOURCE MATERIAL TRANSPORT AS DERIVED FROM Rb-Sr ISOTOPIC SYTEMATICS	CHEMICAL GEOLOGY	ASAHARA, Y; TANAKA, T; KAMIOKA, H; NISHIMURA, A; YAMAZAKI, T	UNKNOWN	19.998	158.498	-1		2.812		TIMS-ID	SEDIMENTARY	UNKNOWN	UNKNOWN	SILICICLASTIC
NP27/160-161		SEDDB	10.1016/S0009-2541(99)00056-X	PROVENANCE OF NORTH PACIFIC SEDIMENTS AND PROCESS OF SOURCE MATERIAL TRANSPORT AS DERIVED FROM Rb-Sr ISOTOPIC SYTEMATICS	CHEMICAL GEOLOGY	ASAHARA, Y; TANAKA, T; KAMIOKA, H; NISHIMURA, A; YAMAZAKI, T	UNKNOWN	19.998	158.498	-1		2.812		TIMS	SEDIMENTARY	UNKNOWN	UNKNOWN	SILICICLASTIC
NP29/56-57		SEDDB	10.1016/S0009-2541(99)00056-X	PROVENANCE OF NORTH PACIFIC SEDIMENTS AND PROCESS OF SOURCE MATERIAL TRANSPORT AS DERIVED FROM Rb-Sr ISOTOPIC SYTEMATICS	CHEMICAL GEOLOGY	ASAHARA, Y; TANAKA, T; KAMIOKA, H; NISHIMURA, A; YAMAZAKI, T	UNKNOWN	19.9987	153.482	-1		1.219		TIMS-ID	SEDIMENTARY	UNKNOWN	UNKNOWN	SILICICLASTIC
NP29/56-57		SEDDB	10.1016/S0009-2541(99)00056-X	PROVENANCE OF NORTH PACIFIC SEDIMENTS AND PROCESS OF SOURCE MATERIAL TRANSPORT AS DERIVED FROM Rb-Sr ISOTOPIC SYTEMATICS	CHEMICAL GEOLOGY	ASAHARA, Y; TANAKA, T; KAMIOKA, H; NISHIMURA, A; YAMAZAKI, T	UNKNOWN	19.9987	153.482	-1		1.219		TIMS	SEDIMENTARY	UNKNOWN	UNKNOWN	SILICICLASTIC
HAKGH93-1/52-53		SEDDB	10.1016/S0009-2541(99)00056-X	PROVENANCE OF NORTH PACIFIC SEDIMENTS AND PROCESS OF SOURCE MATERIAL TRANSPORT AS DERIVED FROM Rb-Sr ISOTOPIC SYTEMATICS	CHEMICAL GEOLOGY	ASAHARA, Y; TANAKA, T; KAMIOKA, H; NISHIMURA, A; YAMAZAKI, T	GH93	24.0023	175.109	-1		0.383		TIMS-ID	SEDIMENTARY	UNKNOWN	UNKNOWN	SILICICLASTIC
HAKGH93-1/52-53		SEDDB	10.1016/S0009-2541(99)00056-X	PROVENANCE OF NORTH PACIFIC SEDIMENTS AND PROCESS OF SOURCE MATERIAL TRANSPORT AS DERIVED FROM Rb-Sr ISOTOPIC SYTEMATICS	CHEMICAL GEOLOGY	ASAHARA, Y; TANAKA, T; KAMIOKA, H; NISHIMURA, A; YAMAZAKI, T	GH93	24.0023	175.109	-1		0.383		TIMS	SEDIMENTARY	UNKNOWN	UNKNOWN	SILICICLASTIC
P75/290-291		SEDDB	10.1016/S0009-2541(99)00056-X	PROVENANCE OF NORTH PACIFIC SEDIMENTS AND PROCESS OF SOURCE MATERIAL TRANSPORT AS DERIVED FROM Rb-Sr ISOTOPIC SYTEMATICS	CHEMICAL GEOLOGY	ASAHARA, Y; TANAKA, T; KAMIOKA, H; NISHIMURA, A; YAMAZAKI, T	UNKNOWN	36.7117	143.217	-1	0		1.806	TIMS-ID	SEDIMENTARY	UNKNOWN	UNKNOWN	SILICICLASTIC
P75/290-291		SEDDB	10.1016/S0009-2541(99)00056-X	PROVENANCE OF NORTH PACIFIC SEDIMENTS AND PROCESS OF SOURCE MATERIAL TRANSPORT AS DERIVED FROM Rb-Sr ISOTOPIC SYTEMATICS	CHEMICAL GEOLOGY	ASAHARA, Y; TANAKA, T; KAMIOKA, H; NISHIMURA, A; YAMAZAKI, T	UNKNOWN	36.7117	143.217	-1	0		1.806	TIMS	SEDIMENTARY	UNKNOWN	UNKNOWN	SILICICLASTIC
HAKGH92-703/390-391		SEDDB	10.1016/S0009-2541(99)00056-X	PROVENANCE OF NORTH PACIFIC SEDIMENTS AND PROCESS OF SOURCE MATERIAL TRANSPORT AS DERIVED FROM Rb-Sr ISOTOPIC SYTEMATICS	CHEMICAL GEOLOGY	ASAHARA, Y; TANAKA, T; KAMIOKA, H; NISHIMURA, A; YAMAZAKI, T	GH92	39.494	136.5	-1	0		1.806	TIMS-ID	SEDIMENTARY	UNKNOWN	UNKNOWN	SILICICLASTIC
HAKGH92-703/390-391		SEDDB	10.1016/S0009-2541(99)00056-X	PROVENANCE OF NORTH PACIFIC SEDIMENTS AND PROCESS OF SOURCE MATERIAL TRANSPORT AS DERIVED FROM Rb-Sr ISOTOPIC SYTEMATICS	CHEMICAL GEOLOGY	ASAHARA, Y; TANAKA, T; KAMIOKA, H; NISHIMURA, A; YAMAZAKI, T	GH92	39.494	136.5	-1	0		1.806	TIMS	SEDIMENTARY	UNKNOWN	UNKNOWN	SILICICLASTIC
NP15/288-289		SEDDB	10.1016/S0009-2541(99)00056-X	PROVENANCE OF NORTH PACIFIC SEDIMENTS AND PROCESS OF SOURCE MATERIAL TRANSPORT AS DERIVED FROM Rb-Sr ISOTOPIC SYTEMATICS	CHEMICAL GEOLOGY	ASAHARA, Y; TANAKA, T; KAMIOKA, H; NISHIMURA, A; YAMAZAKI, T	UNKNOWN	23.9428	135.001	-1		0.607		TIMS-ID	SEDIMENTARY	UNKNOWN	UNKNOWN	SILICICLASTIC
NP15/288-289		SEDDB	10.1016/S0009-2541(99)00056-X	PROVENANCE OF NORTH PACIFIC SEDIMENTS AND PROCESS OF SOURCE MATERIAL TRANSPORT AS DERIVED FROM Rb-Sr ISOTOPIC SYTEMATICS	CHEMICAL GEOLOGY	ASAHARA, Y; TANAKA, T; KAMIOKA, H; NISHIMURA, A; YAMAZAKI, T	UNKNOWN	23.9428	135.001	-1		0.607		TIMS	SEDIMENTARY	UNKNOWN	UNKNOWN	SILICICLASTIC
NP18/18-19		SEDDB	10.1016/S0009-2541(99)00056-X	PROVENANCE OF NORTH PACIFIC SEDIMENTS AND PROCESS OF SOURCE MATERIAL TRANSPORT AS DERIVED FROM Rb-Sr ISOTOPIC SYTEMATICS	CHEMICAL GEOLOGY	ASAHARA, Y; TANAKA, T; KAMIOKA, H; NISHIMURA, A; YAMAZAKI, T	UNKNOWN	20	-175.118	-1		0.305		TIMS-ID	SEDIMENTARY	UNKNOWN	UNKNOWN	SILICICLASTIC
NP18/18-19		SEDDB	10.1016/S0009-2541(99)00056-X	PROVENANCE OF NORTH PACIFIC SEDIMENTS AND PROCESS OF SOURCE MATERIAL TRANSPORT AS DERIVED FROM Rb-Sr ISOTOPIC SYTEMATICS	CHEMICAL GEOLOGY	ASAHARA, Y; TANAKA, T; KAMIOKA, H; NISHIMURA, A; YAMAZAKI, T	UNKNOWN	20	-175.118	-1		0.305		TIMS	SEDIMENTARY	UNKNOWN	UNKNOWN	SILICICLASTIC
NP18/94-95		SEDDB	10.1016/S0009-2541(99)00056-X	PROVENANCE OF NORTH PACIFIC SEDIMENTS AND PROCESS OF SOURCE MATERIAL TRANSPORT AS DERIVED FROM Rb-Sr ISOTOPIC SYTEMATICS	CHEMICAL GEOLOGY	ASAHARA, Y; TANAKA, T; KAMIOKA, H; NISHIMURA, A; YAMAZAKI, T	UNKNOWN	20	-175.118	-1		1.753		TIMS-ID	SEDIMENTARY	UNKNOWN	UNKNOWN	SILICICLASTIC
NP18/94-95		SEDDB	10.1016/S0009-2541(99)00056-X	PROVENANCE OF NORTH PACIFIC SEDIMENTS AND PROCESS OF SOURCE MATERIAL TRANSPORT AS DERIVED FROM Rb-Sr ISOTOPIC SYTEMATICS	CHEMICAL GEOLOGY	ASAHARA, Y; TANAKA, T; KAMIOKA, H; NISHIMURA, A; YAMAZAKI, T	UNKNOWN	20	-175.118	-1		1.753		TIMS	SEDIMENTARY	UNKNOWN	UNKNOWN	SILICICLASTIC
NP27/400-401		SEDDB	10.1016/S0009-2541(99)00056-X	PROVENANCE OF NORTH PACIFIC SEDIMENTS AND PROCESS OF SOURCE MATERIAL TRANSPORT AS DERIVED FROM Rb-Sr ISOTOPIC SYTEMATICS	CHEMICAL GEOLOGY	ASAHARA, Y; TANAKA, T; KAMIOKA, H; NISHIMURA, A; YAMAZAKI, T	UNKNOWN	19.998	158.498	-1		4.838		TIMS-ID	SEDIMENTARY	UNKNOWN	UNKNOWN	SILICICLASTIC
NP27/400-401		SEDDB	10.1016/S0009-2541(99)00056-X	PROVENANCE OF NORTH PACIFIC SEDIMENTS AND PROCESS OF SOURCE MATERIAL TRANSPORT AS DERIVED FROM Rb-Sr ISOTOPIC SYTEMATICS	CHEMICAL GEOLOGY	ASAHARA, Y; TANAKA, T; KAMIOKA, H; NISHIMURA, A; YAMAZAKI, T	UNKNOWN	19.998	158.498	-1		4.838		TIMS	SEDIMENTARY	UNKNOWN	UNKNOWN	SILICICLASTIC
NP29/32-33		SEDDB	10.1016/S0009-2541(99)00056-X	PROVENANCE OF NORTH PACIFIC SEDIMENTS AND PROCESS OF SOURCE MATERIAL TRANSPORT AS DERIVED FROM Rb-Sr ISOTOPIC SYTEMATICS	CHEMICAL GEOLOGY	ASAHARA, Y; TANAKA, T; KAMIOKA, H; NISHIMURA, A; YAMAZAKI, T	UNKNOWN	19.9987	153.482	-1		0.843		TIMS-ID	SEDIMENTARY	UNKNOWN	UNKNOWN	SILICICLASTIC
NP29/32-33		SEDDB	10.1016/S0009-2541(99)00056-X	PROVENANCE OF NORTH PACIFIC SEDIMENTS AND PROCESS OF SOURCE MATERIAL TRANSPORT AS DERIVED FROM Rb-Sr ISOTOPIC SYTEMATICS	CHEMICAL GEOLOGY	ASAHARA, Y; TANAKA, T; KAMIOKA, H; NISHIMURA, A; YAMAZAKI, T	UNKNOWN	19.9987	153.482	-1		0.843		TIMS	SEDIMENTARY	UNKNOWN	UNKNOWN	SILICICLASTIC
NP29/240-241		SEDDB	10.1016/S0009-2541(99)00056-X	PROVENANCE OF NORTH PACIFIC SEDIMENTS AND PROCESS OF SOURCE MATERIAL TRANSPORT AS DERIVED FROM Rb-Sr ISOTOPIC SYTEMATICS	CHEMICAL GEOLOGY	ASAHARA, Y; TANAKA, T; KAMIOKA, H; NISHIMURA, A; YAMAZAKI, T	UNKNOWN	19.9987	153.482	-1		3.029		TIMS-ID	SEDIMENTARY	UNKNOWN	UNKNOWN	SILICICLASTIC
NP29/240-241		SEDDB	10.1016/S0009-2541(99)00056-X	PROVENANCE OF NORTH PACIFIC SEDIMENTS AND PROCESS OF SOURCE MATERIAL TRANSPORT AS DERIVED FROM Rb-Sr ISOTOPIC SYTEMATICS	CHEMICAL GEOLOGY	ASAHARA, Y; TANAKA, T; KAMIOKA, H; NISHIMURA, A; YAMAZAKI, T	UNKNOWN	19.9987	153.482	-1		3.029		TIMS	SEDIMENTARY	UNKNOWN	UNKNOWN	SILICICLASTIC
NGC47/0-1		SEDDB	10.1016/S0009-2541(99)00056-X	PROVENANCE OF NORTH PACIFIC SEDIMENTS AND PROCESS OF SOURCE MATERIAL TRANSPORT AS DERIVED FROM Rb-Sr ISOTOPIC SYTEMATICS	CHEMICAL GEOLOGY	ASAHARA, Y; TANAKA, T; KAMIOKA, H; NISHIMURA, A; YAMAZAKI, T	UNKNOWN	7.929	174.999	-1		0.005		TIMS-ID	SEDIMENTARY	UNKNOWN	UNKNOWN	SILICICLASTIC
NGC47/0-1		SEDDB	10.1016/S0009-2541(99)00056-X	PROVENANCE OF NORTH PACIFIC SEDIMENTS AND PROCESS OF SOURCE MATERIAL TRANSPORT AS DERIVED FROM Rb-Sr ISOTOPIC SYTEMATICS	CHEMICAL GEOLOGY	ASAHARA, Y; TANAKA, T; KAMIOKA, H; NISHIMURA, A; YAMAZAKI, T	UNKNOWN	7.929	174.999	-1		0.005		TIMS	SEDIMENTARY	UNKNOWN	UNKNOWN	SILICICLASTIC
NGC47/202-203		SEDDB	10.1016/S0009-2541(99)00056-X	PROVENANCE OF NORTH PACIFIC SEDIMENTS AND PROCESS OF SOURCE MATERIAL TRANSPORT AS DERIVED FROM Rb-Sr ISOTOPIC SYTEMATICS	CHEMICAL GEOLOGY	ASAHARA, Y; TANAKA, T; KAMIOKA, H; NISHIMURA, A; YAMAZAKI, T	UNKNOWN	7.929	174.999	-1		1.696		TIMS-ID	SEDIMENTARY	UNKNOWN	UNKNOWN	SILICICLASTIC
NGC47/202-203		SEDDB	10.1016/S0009-2541(99)00056-X	PROVENANCE OF NORTH PACIFIC SEDIMENTS AND PROCESS OF SOURCE MATERIAL TRANSPORT AS DERIVED FROM Rb-Sr ISOTOPIC SYTEMATICS	CHEMICAL GEOLOGY	ASAHARA, Y; TANAKA, T; KAMIOKA, H; NISHIMURA, A; YAMAZAKI, T	UNKNOWN	7.929	174.999	-1		1.696		TIMS	SEDIMENTARY	UNKNOWN	UNKNOWN	SILICICLASTIC
NGC47/162-163		SEDDB	10.1016/S0009-2541(99)00056-X	PROVENANCE OF NORTH PACIFIC SEDIMENTS AND PROCESS OF SOURCE MATERIAL TRANSPORT AS DERIVED FROM Rb-Sr ISOTOPIC SYTEMATICS	CHEMICAL GEOLOGY	ASAHARA, Y; TANAKA, T; KAMIOKA, H; NISHIMURA, A; YAMAZAKI, T	UNKNOWN	7.929	174.999	-1		1.439		TIMS-ID	SEDIMENTARY	UNKNOWN	UNKNOWN	SILICICLASTIC
NGC47/162-163		SEDDB	10.1016/S0009-2541(99)00056-X	PROVENANCE OF NORTH PACIFIC SEDIMENTS AND PROCESS OF SOURCE MATERIAL TRANSPORT AS DERIVED FROM Rb-Sr ISOTOPIC SYTEMATICS	CHEMICAL GEOLOGY	ASAHARA, Y; TANAKA, T; KAMIOKA, H; NISHIMURA, A; YAMAZAKI, T	UNKNOWN	7.929	174.999	-1		1.439		TIMS	SEDIMENTARY	UNKNOWN	UNKNOWN	SILICICLASTIC
HAKGH93-1/13-14		SEDDB	10.1016/S0009-2541(99)00056-X	PROVENANCE OF NORTH PACIFIC SEDIMENTS AND PROCESS OF SOURCE MATERIAL TRANSPORT AS DERIVED FROM Rb-Sr ISOTOPIC SYTEMATICS	CHEMICAL GEOLOGY	ASAHARA, Y; TANAKA, T; KAMIOKA, H; NISHIMURA, A; YAMAZAKI, T	GH93	24.0023	175.109	-1		0.098		TIMS-ID	SEDIMENTARY	UNKNOWN	UNKNOWN	SILICICLASTIC
HAKGH93-1/13-14		SEDDB	10.1016/S0009-2541(99)00056-X	PROVENANCE OF NORTH PACIFIC SEDIMENTS AND PROCESS OF SOURCE MATERIAL TRANSPORT AS DERIVED FROM Rb-Sr ISOTOPIC SYTEMATICS	CHEMICAL GEOLOGY	ASAHARA, Y; TANAKA, T; KAMIOKA, H; NISHIMURA, A; YAMAZAKI, T	GH93	24.0023	175.109	-1		0.098		TIMS	SEDIMENTARY	UNKNOWN	UNKNOWN	SILICICLASTIC
HAKGH93-1/162-163		SEDDB	10.1016/S0009-2541(99)00056-X	PROVENANCE OF NORTH PACIFIC SEDIMENTS AND PROCESS OF SOURCE MATERIAL TRANSPORT AS DERIVED FROM Rb-Sr ISOTOPIC SYTEMATICS	CHEMICAL GEOLOGY	ASAHARA, Y; TANAKA, T; KAMIOKA, H; NISHIMURA, A; YAMAZAKI, T	GH93	24.0023	175.109	-1		1.245		TIMS-ID	SEDIMENTARY	UNKNOWN	UNKNOWN	SILICICLASTIC
HAKGH93-1/162-163		SEDDB	10.1016/S0009-2541(99)00056-X	PROVENANCE OF NORTH PACIFIC SEDIMENTS AND PROCESS OF SOURCE MATERIAL TRANSPORT AS DERIVED FROM Rb-Sr ISOTOPIC SYTEMATICS	CHEMICAL GEOLOGY	ASAHARA, Y; TANAKA, T; KAMIOKA, H; NISHIMURA, A; YAMAZAKI, T	GH93	24.0023	175.109	-1		1.245		TIMS	SEDIMENTARY	UNKNOWN	UNKNOWN	SILICICLASTIC
HAKGH92-703/30-31		SEDDB	10.1016/S0009-2541(99)00056-X	PROVENANCE OF NORTH PACIFIC SEDIMENTS AND PROCESS OF SOURCE MATERIAL TRANSPORT AS DERIVED FROM Rb-Sr ISOTOPIC SYTEMATICS	CHEMICAL GEOLOGY	ASAHARA, Y; TANAKA, T; KAMIOKA, H; NISHIMURA, A; YAMAZAKI, T	GH92	39.494	136.5	-1	0		1.806	TIMS-ID	SEDIMENTARY	UNKNOWN	UNKNOWN	SILICICLASTIC
HAKGH92-703/30-31		SEDDB	10.1016/S0009-2541(99)00056-X	PROVENANCE OF NORTH PACIFIC SEDIMENTS AND PROCESS OF SOURCE MATERIAL TRANSPORT AS DERIVED FROM Rb-Sr ISOTOPIC SYTEMATICS	CHEMICAL GEOLOGY	ASAHARA, Y; TANAKA, T; KAMIOKA, H; NISHIMURA, A; YAMAZAKI, T	GH92	39.494	136.5	-1	0		1.806	TIMS	SEDIMENTARY	UNKNOWN	UNKNOWN	SILICICLASTIC
HAKGH92-703/630-631		SEDDB	10.1016/S0009-2541(99)00056-X	PROVENANCE OF NORTH PACIFIC SEDIMENTS AND PROCESS OF SOURCE MATERIAL TRANSPORT AS DERIVED FROM Rb-Sr ISOTOPIC SYTEMATICS	CHEMICAL GEOLOGY	ASAHARA, Y; TANAKA, T; KAMIOKA, H; NISHIMURA, A; YAMAZAKI, T	GH92	39.494	136.5	-1	0		1.806	TIMS-ID	SEDIMENTARY	UNKNOWN	UNKNOWN	SILICICLASTIC
HAKGH92-703/630-631		SEDDB	10.1016/S0009-2541(99)00056-X	PROVENANCE OF NORTH PACIFIC SEDIMENTS AND PROCESS OF SOURCE MATERIAL TRANSPORT AS DERIVED FROM Rb-Sr ISOTOPIC SYTEMATICS	CHEMICAL GEOLOGY	ASAHARA, Y; TANAKA, T; KAMIOKA, H; NISHIMURA, A; YAMAZAKI, T	GH92	39.494	136.5	-1	0		1.806	TIMS	SEDIMENTARY	UNKNOWN	UNKNOWN	SILICICLASTIC
NP15/411.5-412.5		SEDDB	10.1016/S0009-2541(99)00056-X	PROVENANCE OF NORTH PACIFIC SEDIMENTS AND PROCESS OF SOURCE MATERIAL TRANSPORT AS DERIVED FROM Rb-Sr ISOTOPIC SYTEMATICS	CHEMICAL GEOLOGY	ASAHARA, Y; TANAKA, T; KAMIOKA, H; NISHIMURA, A; YAMAZAKI, T	UNKNOWN	23.9428	135.001	-1		0.85		TIMS-ID	SEDIMENTARY	UNKNOWN	UNKNOWN	SILICICLASTIC
NP15/411.5-412.5		SEDDB	10.1016/S0009-2541(99)00056-X	PROVENANCE OF NORTH PACIFIC SEDIMENTS AND PROCESS OF SOURCE MATERIAL TRANSPORT AS DERIVED FROM Rb-Sr ISOTOPIC SYTEMATICS	CHEMICAL GEOLOGY	ASAHARA, Y; TANAKA, T; KAMIOKA, H; NISHIMURA, A; YAMAZAKI, T	UNKNOWN	23.9428	135.001	-1		0.85		TIMS	SEDIMENTARY	UNKNOWN	UNKNOWN	SILICICLASTIC
NP16/0-1		SEDDB	10.1016/S0009-2541(99)00056-X	PROVENANCE OF NORTH PACIFIC SEDIMENTS AND PROCESS OF SOURCE MATERIAL TRANSPORT AS DERIVED FROM Rb-Sr ISOTOPIC SYTEMATICS	CHEMICAL GEOLOGY	ASAHARA, Y; TANAKA, T; KAMIOKA, H; NISHIMURA, A; YAMAZAKI, T	UNKNOWN	19.9932	-162.494	-1		0.002		TIMS-ID	SEDIMENTARY	UNKNOWN	UNKNOWN	SILICICLASTIC
NP16/0-1		SEDDB	10.1016/S0009-2541(99)00056-X	PROVENANCE OF NORTH PACIFIC SEDIMENTS AND PROCESS OF SOURCE MATERIAL TRANSPORT AS DERIVED FROM Rb-Sr ISOTOPIC SYTEMATICS	CHEMICAL GEOLOGY	ASAHARA, Y; TANAKA, T; KAMIOKA, H; NISHIMURA, A; YAMAZAKI, T	UNKNOWN	19.9932	-162.494	-1		0.002		TIMS	SEDIMENTARY	UNKNOWN	UNKNOWN	SILICICLASTIC
NP16/242-243		SEDDB	10.1016/S0009-2541(99)00056-X	PROVENANCE OF NORTH PACIFIC SEDIMENTS AND PROCESS OF SOURCE MATERIAL TRANSPORT AS DERIVED FROM Rb-Sr ISOTOPIC SYTEMATICS	CHEMICAL GEOLOGY	ASAHARA, Y; TANAKA, T; KAMIOKA, H; NISHIMURA, A; YAMAZAKI, T	UNKNOWN	19.9932	-162.494	-1		0.988		TIMS-ID	SEDIMENTARY	UNKNOWN	UNKNOWN	SILICICLASTIC
NP16/242-243		SEDDB	10.1016/S0009-2541(99)00056-X	PROVENANCE OF NORTH PACIFIC SEDIMENTS AND PROCESS OF SOURCE MATERIAL TRANSPORT AS DERIVED FROM Rb-Sr ISOTOPIC SYTEMATICS	CHEMICAL GEOLOGY	ASAHARA, Y; TANAKA, T; KAMIOKA, H; NISHIMURA, A; YAMAZAKI, T	UNKNOWN	19.9932	-162.494	-1		0.988		TIMS	SEDIMENTARY	UNKNOWN	UNKNOWN	SILICICLASTIC
NP16/482-483		SEDDB	10.1016/S0009-2541(99)00056-X	PROVENANCE OF NORTH PACIFIC SEDIMENTS AND PROCESS OF SOURCE MATERIAL TRANSPORT AS DERIVED FROM Rb-Sr ISOTOPIC SYTEMATICS	CHEMICAL GEOLOGY	ASAHARA, Y; TANAKA, T; KAMIOKA, H; NISHIMURA, A; YAMAZAKI, T	UNKNOWN	19.9932	-162.494	-1		1.63		TIMS-ID	SEDIMENTARY	UNKNOWN	UNKNOWN	SILICICLASTIC
NP16/482-483		SEDDB	10.1016/S0009-2541(99)00056-X	PROVENANCE OF NORTH PACIFIC SEDIMENTS AND PROCESS OF SOURCE MATERIAL TRANSPORT AS DERIVED FROM Rb-Sr ISOTOPIC SYTEMATICS	CHEMICAL GEOLOGY	ASAHARA, Y; TANAKA, T; KAMIOKA, H; NISHIMURA, A; YAMAZAKI, T	UNKNOWN	19.9932	-162.494	-1		1.63		TIMS	SEDIMENTARY	UNKNOWN	UNKNOWN	SILICICLASTIC
NP18/128-129		SEDDB	10.1016/S0009-2541(99)00056-X	PROVENANCE OF NORTH PACIFIC SEDIMENTS AND PROCESS OF SOURCE MATERIAL TRANSPORT AS DERIVED FROM Rb-Sr ISOTOPIC SYTEMATICS	CHEMICAL GEOLOGY	ASAHARA, Y; TANAKA, T; KAMIOKA, H; NISHIMURA, A; YAMAZAKI, T	UNKNOWN	20	-175.118	-1		2.347		TIMS-ID	SEDIMENTARY	UNKNOWN	UNKNOWN	SILICICLASTIC
NP18/128-129		SEDDB	10.1016/S0009-2541(99)00056-X	PROVENANCE OF NORTH PACIFIC SEDIMENTS AND PROCESS OF SOURCE MATERIAL TRANSPORT AS DERIVED FROM Rb-Sr ISOTOPIC SYTEMATICS	CHEMICAL GEOLOGY	ASAHARA, Y; TANAKA, T; KAMIOKA, H; NISHIMURA, A; YAMAZAKI, T	UNKNOWN	20	-175.118	-1		2.347		TIMS	SEDIMENTARY	UNKNOWN	UNKNOWN	SILICICLASTIC
NP27/120-121		SEDDB	10.1016/S0009-2541(99)00056-X	PROVENANCE OF NORTH PACIFIC SEDIMENTS AND PROCESS OF SOURCE MATERIAL TRANSPORT AS DERIVED FROM Rb-Sr ISOTOPIC SYTEMATICS	CHEMICAL GEOLOGY	ASAHARA, Y; TANAKA, T; KAMIOKA, H; NISHIMURA, A; YAMAZAKI, T	UNKNOWN	19.998	158.498	-1		2.604		TIMS-ID	SEDIMENTARY	UNKNOWN	UNKNOWN	SILICICLASTIC
NP27/120-121		SEDDB	10.1016/S0009-2541(99)00056-X	PROVENANCE OF NORTH PACIFIC SEDIMENTS AND PROCESS OF SOURCE MATERIAL TRANSPORT AS DERIVED FROM Rb-Sr ISOTOPIC SYTEMATICS	CHEMICAL GEOLOGY	ASAHARA, Y; TANAKA, T; KAMIOKA, H; NISHIMURA, A; YAMAZAKI, T	UNKNOWN	19.998	158.498	-1		2.604		TIMS	SEDIMENTARY	UNKNOWN	UNKNOWN	SILICICLASTIC
NP27/360-361		SEDDB	10.1016/S0009-2541(99)00056-X	PROVENANCE OF NORTH PACIFIC SEDIMENTS AND PROCESS OF SOURCE MATERIAL TRANSPORT AS DERIVED FROM Rb-Sr ISOTOPIC SYTEMATICS	CHEMICAL GEOLOGY	ASAHARA, Y; TANAKA, T; KAMIOKA, H; NISHIMURA, A; YAMAZAKI, T	UNKNOWN	19.998	158.498	-1		4.546		TIMS-ID	SEDIMENTARY	UNKNOWN	UNKNOWN	SILICICLASTIC
NP27/360-361		SEDDB	10.1016/S0009-2541(99)00056-X	PROVENANCE OF NORTH PACIFIC SEDIMENTS AND PROCESS OF SOURCE MATERIAL TRANSPORT AS DERIVED FROM Rb-Sr ISOTOPIC SYTEMATICS	CHEMICAL GEOLOGY	ASAHARA, Y; TANAKA, T; KAMIOKA, H; NISHIMURA, A; YAMAZAKI, T	UNKNOWN	19.998	158.498	-1		4.546		TIMS	SEDIMENTARY	UNKNOWN	UNKNOWN	SILICICLASTIC
NGC47/282-283		SEDDB	10.1016/S0009-2541(99)00056-X	PROVENANCE OF NORTH PACIFIC SEDIMENTS AND PROCESS OF SOURCE MATERIAL TRANSPORT AS DERIVED FROM Rb-Sr ISOTOPIC SYTEMATICS	CHEMICAL GEOLOGY	ASAHARA, Y; TANAKA, T; KAMIOKA, H; NISHIMURA, A; YAMAZAKI, T	UNKNOWN	7.929	174.999	-1		1.922		TIMS-ID	SEDIMENTARY	UNKNOWN	UNKNOWN	SILICICLASTIC
NGC47/282-283		SEDDB	10.1016/S0009-2541(99)00056-X	PROVENANCE OF NORTH PACIFIC SEDIMENTS AND PROCESS OF SOURCE MATERIAL TRANSPORT AS DERIVED FROM Rb-Sr ISOTOPIC SYTEMATICS	CHEMICAL GEOLOGY	ASAHARA, Y; TANAKA, T; KAMIOKA, H; NISHIMURA, A; YAMAZAKI, T	UNKNOWN	7.929	174.999	-1		1.922		TIMS	SEDIMENTARY	UNKNOWN	UNKNOWN	SILICICLASTIC
HAKGH93-1/70-71		SEDDB	10.1016/S0009-2541(99)00056-X	PROVENANCE OF NORTH PACIFIC SEDIMENTS AND PROCESS OF SOURCE MATERIAL TRANSPORT AS DERIVED FROM Rb-Sr ISOTOPIC SYTEMATICS	CHEMICAL GEOLOGY	ASAHARA, Y; TANAKA, T; KAMIOKA, H; NISHIMURA, A; YAMAZAKI, T	GH93	24.0023	175.109	-1		0.514		TIMS-ID	SEDIMENTARY	UNKNOWN	UNKNOWN	SILICICLASTIC
HAKGH93-1/70-71		SEDDB	10.1016/S0009-2541(99)00056-X	PROVENANCE OF NORTH PACIFIC SEDIMENTS AND PROCESS OF SOURCE MATERIAL TRANSPORT AS DERIVED FROM Rb-Sr ISOTOPIC SYTEMATICS	CHEMICAL GEOLOGY	ASAHARA, Y; TANAKA, T; KAMIOKA, H; NISHIMURA, A; YAMAZAKI, T	GH93	24.0023	175.109	-1		0.514		TIMS	SEDIMENTARY	UNKNOWN	UNKNOWN	SILICICLASTIC
HAKGH93-1/301-302		SEDDB	10.1016/S0009-2541(99)00056-X	PROVENANCE OF NORTH PACIFIC SEDIMENTS AND PROCESS OF SOURCE MATERIAL TRANSPORT AS DERIVED FROM Rb-Sr ISOTOPIC SYTEMATICS	CHEMICAL GEOLOGY	ASAHARA, Y; TANAKA, T; KAMIOKA, H; NISHIMURA, A; YAMAZAKI, T	GH93	24.0023	175.109	-1		2.548		TIMS-ID	SEDIMENTARY	UNKNOWN	UNKNOWN	SILICICLASTIC
HAKGH93-1/301-302		SEDDB	10.1016/S0009-2541(99)00056-X	PROVENANCE OF NORTH PACIFIC SEDIMENTS AND PROCESS OF SOURCE MATERIAL TRANSPORT AS DERIVED FROM Rb-Sr ISOTOPIC SYTEMATICS	CHEMICAL GEOLOGY	ASAHARA, Y; TANAKA, T; KAMIOKA, H; NISHIMURA, A; YAMAZAKI, T	GH93	24.0023	175.109	-1		2.548		TIMS	SEDIMENTARY	UNKNOWN	UNKNOWN	SILICICLASTIC
HAKGH92-703/330-331		SEDDB	10.1016/S0009-2541(99)00056-X	PROVENANCE OF NORTH PACIFIC SEDIMENTS AND PROCESS OF SOURCE MATERIAL TRANSPORT AS DERIVED FROM Rb-Sr ISOTOPIC SYTEMATICS	CHEMICAL GEOLOGY	ASAHARA, Y; TANAKA, T; KAMIOKA, H; NISHIMURA, A; YAMAZAKI, T	GH92	39.494	136.5	-1	0		1.806	TIMS-ID	SEDIMENTARY	UNKNOWN	UNKNOWN	SILICICLASTIC
HAKGH92-703/330-331		SEDDB	10.1016/S0009-2541(99)00056-X	PROVENANCE OF NORTH PACIFIC SEDIMENTS AND PROCESS OF SOURCE MATERIAL TRANSPORT AS DERIVED FROM Rb-Sr ISOTOPIC SYTEMATICS	CHEMICAL GEOLOGY	ASAHARA, Y; TANAKA, T; KAMIOKA, H; NISHIMURA, A; YAMAZAKI, T	GH92	39.494	136.5	-1	0		1.806	TIMS	SEDIMENTARY	UNKNOWN	UNKNOWN	SILICICLASTIC
HAKGH92-703/570-571		SEDDB	10.1016/S0009-2541(99)00056-X	PROVENANCE OF NORTH PACIFIC SEDIMENTS AND PROCESS OF SOURCE MATERIAL TRANSPORT AS DERIVED FROM Rb-Sr ISOTOPIC SYTEMATICS	CHEMICAL GEOLOGY	ASAHARA, Y; TANAKA, T; KAMIOKA, H; NISHIMURA, A; YAMAZAKI, T	GH92	39.494	136.5	-1	0		1.806	TIMS-ID	SEDIMENTARY	UNKNOWN	UNKNOWN	SILICICLASTIC
HAKGH92-703/570-571		SEDDB	10.1016/S0009-2541(99)00056-X	PROVENANCE OF NORTH PACIFIC SEDIMENTS AND PROCESS OF SOURCE MATERIAL TRANSPORT AS DERIVED FROM Rb-Sr ISOTOPIC SYTEMATICS	CHEMICAL GEOLOGY	ASAHARA, Y; TANAKA, T; KAMIOKA, H; NISHIMURA, A; YAMAZAKI, T	GH92	39.494	136.5	-1	0		1.806	TIMS	SEDIMENTARY	UNKNOWN	UNKNOWN	SILICICLASTIC
NP15/128-129		SEDDB	10.1016/S0009-2541(99)00056-X	PROVENANCE OF NORTH PACIFIC SEDIMENTS AND PROCESS OF SOURCE MATERIAL TRANSPORT AS DERIVED FROM Rb-Sr ISOTOPIC SYTEMATICS	CHEMICAL GEOLOGY	ASAHARA, Y; TANAKA, T; KAMIOKA, H; NISHIMURA, A; YAMAZAKI, T	UNKNOWN	23.9428	135.001	-1		0.27		TIMS-ID	SEDIMENTARY	UNKNOWN	UNKNOWN	SILICICLASTIC
NP15/128-129		SEDDB	10.1016/S0009-2541(99)00056-X	PROVENANCE OF NORTH PACIFIC SEDIMENTS AND PROCESS OF SOURCE MATERIAL TRANSPORT AS DERIVED FROM Rb-Sr ISOTOPIC SYTEMATICS	CHEMICAL GEOLOGY	ASAHARA, Y; TANAKA, T; KAMIOKA, H; NISHIMURA, A; YAMAZAKI, T	UNKNOWN	23.9428	135.001	-1		0.27		TIMS	SEDIMENTARY	UNKNOWN	UNKNOWN	SILICICLASTIC
NP15/371.5-372.5		SEDDB	10.1016/S0009-2541(99)00056-X	PROVENANCE OF NORTH PACIFIC SEDIMENTS AND PROCESS OF SOURCE MATERIAL TRANSPORT AS DERIVED FROM Rb-Sr ISOTOPIC SYTEMATICS	CHEMICAL GEOLOGY	ASAHARA, Y; TANAKA, T; KAMIOKA, H; NISHIMURA, A; YAMAZAKI, T	UNKNOWN	23.9428	135.001	-1		0.782		TIMS-ID	SEDIMENTARY	UNKNOWN	UNKNOWN	SILICICLASTIC
NP15/371.5-372.5		SEDDB	10.1016/S0009-2541(99)00056-X	PROVENANCE OF NORTH PACIFIC SEDIMENTS AND PROCESS OF SOURCE MATERIAL TRANSPORT AS DERIVED FROM Rb-Sr ISOTOPIC SYTEMATICS	CHEMICAL GEOLOGY	ASAHARA, Y; TANAKA, T; KAMIOKA, H; NISHIMURA, A; YAMAZAKI, T	UNKNOWN	23.9428	135.001	-1		0.782		TIMS	SEDIMENTARY	UNKNOWN	UNKNOWN	SILICICLASTIC
NP18/154-155		SEDDB	10.1016/S0009-2541(99)00056-X	PROVENANCE OF NORTH PACIFIC SEDIMENTS AND PROCESS OF SOURCE MATERIAL TRANSPORT AS DERIVED FROM Rb-Sr ISOTOPIC SYTEMATICS	CHEMICAL GEOLOGY	ASAHARA, Y; TANAKA, T; KAMIOKA, H; NISHIMURA, A; YAMAZAKI, T	UNKNOWN	20	-175.118	-1		2.957		TIMS-ID	SEDIMENTARY	UNKNOWN	UNKNOWN	SILICICLASTIC
NP18/154-155		SEDDB	10.1016/S0009-2541(99)00056-X	PROVENANCE OF NORTH PACIFIC SEDIMENTS AND PROCESS OF SOURCE MATERIAL TRANSPORT AS DERIVED FROM Rb-Sr ISOTOPIC SYTEMATICS	CHEMICAL GEOLOGY	ASAHARA, Y; TANAKA, T; KAMIOKA, H; NISHIMURA, A; YAMAZAKI, T	UNKNOWN	20	-175.118	-1		2.957		TIMS	SEDIMENTARY	UNKNOWN	UNKNOWN	SILICICLASTIC
NP27/0-1		SEDDB	10.1016/S0009-2541(99)00056-X	PROVENANCE OF NORTH PACIFIC SEDIMENTS AND PROCESS OF SOURCE MATERIAL TRANSPORT AS DERIVED FROM Rb-Sr ISOTOPIC SYTEMATICS	CHEMICAL GEOLOGY	ASAHARA, Y; TANAKA, T; KAMIOKA, H; NISHIMURA, A; YAMAZAKI, T	UNKNOWN	19.998	158.498	-1		1.599		TIMS-ID	SEDIMENTARY	UNKNOWN	UNKNOWN	SILICICLASTIC
NP27/0-1		SEDDB	10.1016/S0009-2541(99)00056-X	PROVENANCE OF NORTH PACIFIC SEDIMENTS AND PROCESS OF SOURCE MATERIAL TRANSPORT AS DERIVED FROM Rb-Sr ISOTOPIC SYTEMATICS	CHEMICAL GEOLOGY	ASAHARA, Y; TANAKA, T; KAMIOKA, H; NISHIMURA, A; YAMAZAKI, T	UNKNOWN	19.998	158.498	-1		1.599		TIMS	SEDIMENTARY	UNKNOWN	UNKNOWN	SILICICLASTIC
NP27/680-681		SEDDB	10.1016/S0009-2541(99)00056-X	PROVENANCE OF NORTH PACIFIC SEDIMENTS AND PROCESS OF SOURCE MATERIAL TRANSPORT AS DERIVED FROM Rb-Sr ISOTOPIC SYTEMATICS	CHEMICAL GEOLOGY	ASAHARA, Y; TANAKA, T; KAMIOKA, H; NISHIMURA, A; YAMAZAKI, T	UNKNOWN	19.998	158.498	-1		6.9		TIMS-ID	SEDIMENTARY	UNKNOWN	UNKNOWN	SILICICLASTIC
NP27/680-681		SEDDB	10.1016/S0009-2541(99)00056-X	PROVENANCE OF NORTH PACIFIC SEDIMENTS AND PROCESS OF SOURCE MATERIAL TRANSPORT AS DERIVED FROM Rb-Sr ISOTOPIC SYTEMATICS	CHEMICAL GEOLOGY	ASAHARA, Y; TANAKA, T; KAMIOKA, H; NISHIMURA, A; YAMAZAKI, T	UNKNOWN	19.998	158.498	-1		6.9		TIMS	SEDIMENTARY	UNKNOWN	UNKNOWN	SILICICLASTIC
NP29/102-103		SEDDB	10.1016/S0009-2541(99)00056-X	PROVENANCE OF NORTH PACIFIC SEDIMENTS AND PROCESS OF SOURCE MATERIAL TRANSPORT AS DERIVED FROM Rb-Sr ISOTOPIC SYTEMATICS	CHEMICAL GEOLOGY	ASAHARA, Y; TANAKA, T; KAMIOKA, H; NISHIMURA, A; YAMAZAKI, T	UNKNOWN	19.9987	153.482	-1		1.838		TIMS-ID	SEDIMENTARY	UNKNOWN	UNKNOWN	SILICICLASTIC
NP29/102-103		SEDDB	10.1016/S0009-2541(99)00056-X	PROVENANCE OF NORTH PACIFIC SEDIMENTS AND PROCESS OF SOURCE MATERIAL TRANSPORT AS DERIVED FROM Rb-Sr ISOTOPIC SYTEMATICS	CHEMICAL GEOLOGY	ASAHARA, Y; TANAKA, T; KAMIOKA, H; NISHIMURA, A; YAMAZAKI, T	UNKNOWN	19.9987	153.482	-1		1.838		TIMS	SEDIMENTARY	UNKNOWN	UNKNOWN	SILICICLASTIC
NGC47/122-123		SEDDB	10.1016/S0009-2541(99)00056-X	PROVENANCE OF NORTH PACIFIC SEDIMENTS AND PROCESS OF SOURCE MATERIAL TRANSPORT AS DERIVED FROM Rb-Sr ISOTOPIC SYTEMATICS	CHEMICAL GEOLOGY	ASAHARA, Y; TANAKA, T; KAMIOKA, H; NISHIMURA, A; YAMAZAKI, T	UNKNOWN	7.929	174.999	-1		1.182		TIMS-ID	SEDIMENTARY	UNKNOWN	UNKNOWN	SILICICLASTIC
NGC47/122-123		SEDDB	10.1016/S0009-2541(99)00056-X	PROVENANCE OF NORTH PACIFIC SEDIMENTS AND PROCESS OF SOURCE MATERIAL TRANSPORT AS DERIVED FROM Rb-Sr ISOTOPIC SYTEMATICS	CHEMICAL GEOLOGY	ASAHARA, Y; TANAKA, T; KAMIOKA, H; NISHIMURA, A; YAMAZAKI, T	UNKNOWN	7.929	174.999	-1		1.182		TIMS	SEDIMENTARY	UNKNOWN	UNKNOWN	SILICICLASTIC
NGC47/242-243		SEDDB	10.1016/S0009-2541(99)00056-X	PROVENANCE OF NORTH PACIFIC SEDIMENTS AND PROCESS OF SOURCE MATERIAL TRANSPORT AS DERIVED FROM Rb-Sr ISOTOPIC SYTEMATICS	CHEMICAL GEOLOGY	ASAHARA, Y; TANAKA, T; KAMIOKA, H; NISHIMURA, A; YAMAZAKI, T	UNKNOWN	7.929	174.999	-1		1.833		TIMS-ID	SEDIMENTARY	UNKNOWN	UNKNOWN	SILICICLASTIC
NGC47/242-243		SEDDB	10.1016/S0009-2541(99)00056-X	PROVENANCE OF NORTH PACIFIC SEDIMENTS AND PROCESS OF SOURCE MATERIAL TRANSPORT AS DERIVED FROM Rb-Sr ISOTOPIC SYTEMATICS	CHEMICAL GEOLOGY	ASAHARA, Y; TANAKA, T; KAMIOKA, H; NISHIMURA, A; YAMAZAKI, T	UNKNOWN	7.929	174.999	-1		1.833		TIMS	SEDIMENTARY	UNKNOWN	UNKNOWN	SILICICLASTIC
NP29/188-189		SEDDB	10.1016/S0009-2541(99)00056-X	PROVENANCE OF NORTH PACIFIC SEDIMENTS AND PROCESS OF SOURCE MATERIAL TRANSPORT AS DERIVED FROM Rb-Sr ISOTOPIC SYTEMATICS	CHEMICAL GEOLOGY	ASAHARA, Y; TANAKA, T; KAMIOKA, H; NISHIMURA, A; YAMAZAKI, T	UNKNOWN	19.9987	153.482	-1		2.649		TIMS-ID	SEDIMENTARY	UNKNOWN	UNKNOWN	SILICICLASTIC
NP29/188-189		SEDDB	10.1016/S0009-2541(99)00056-X	PROVENANCE OF NORTH PACIFIC SEDIMENTS AND PROCESS OF SOURCE MATERIAL TRANSPORT AS DERIVED FROM Rb-Sr ISOTOPIC SYTEMATICS	CHEMICAL GEOLOGY	ASAHARA, Y; TANAKA, T; KAMIOKA, H; NISHIMURA, A; YAMAZAKI, T	UNKNOWN	19.9987	153.482	-1		2.649		TIMS	SEDIMENTARY	UNKNOWN	UNKNOWN	SILICICLASTIC
HAKGH93-1/60-61		SEDDB	10.1016/S0009-2541(99)00056-X	PROVENANCE OF NORTH PACIFIC SEDIMENTS AND PROCESS OF SOURCE MATERIAL TRANSPORT AS DERIVED FROM Rb-Sr ISOTOPIC SYTEMATICS	CHEMICAL GEOLOGY	ASAHARA, Y; TANAKA, T; KAMIOKA, H; NISHIMURA, A; YAMAZAKI, T	GH93	24.0023	175.109	-1		0.441		TIMS-ID	SEDIMENTARY	UNKNOWN	UNKNOWN	SILICICLASTIC
HAKGH93-1/60-61		SEDDB	10.1016/S0009-2541(99)00056-X	PROVENANCE OF NORTH PACIFIC SEDIMENTS AND PROCESS OF SOURCE MATERIAL TRANSPORT AS DERIVED FROM Rb-Sr ISOTOPIC SYTEMATICS	CHEMICAL GEOLOGY	ASAHARA, Y; TANAKA, T; KAMIOKA, H; NISHIMURA, A; YAMAZAKI, T	GH93	24.0023	175.109	-1		0.441		TIMS	SEDIMENTARY	UNKNOWN	UNKNOWN	SILICICLASTIC
HAKGH93-1/212-213		SEDDB	10.1016/S0009-2541(99)00056-X	PROVENANCE OF NORTH PACIFIC SEDIMENTS AND PROCESS OF SOURCE MATERIAL TRANSPORT AS DERIVED FROM Rb-Sr ISOTOPIC SYTEMATICS	CHEMICAL GEOLOGY	ASAHARA, Y; TANAKA, T; KAMIOKA, H; NISHIMURA, A; YAMAZAKI, T	GH93	24.0023	175.109	-1		1.652		TIMS-ID	SEDIMENTARY	UNKNOWN	UNKNOWN	SILICICLASTIC
HAKGH93-1/212-213		SEDDB	10.1016/S0009-2541(99)00056-X	PROVENANCE OF NORTH PACIFIC SEDIMENTS AND PROCESS OF SOURCE MATERIAL TRANSPORT AS DERIVED FROM Rb-Sr ISOTOPIC SYTEMATICS	CHEMICAL GEOLOGY	ASAHARA, Y; TANAKA, T; KAMIOKA, H; NISHIMURA, A; YAMAZAKI, T	GH93	24.0023	175.109	-1		1.652		TIMS	SEDIMENTARY	UNKNOWN	UNKNOWN	SILICICLASTIC
HAKGH93-1/352-353		SEDDB	10.1016/S0009-2541(99)00056-X	PROVENANCE OF NORTH PACIFIC SEDIMENTS AND PROCESS OF SOURCE MATERIAL TRANSPORT AS DERIVED FROM Rb-Sr ISOTOPIC SYTEMATICS	CHEMICAL GEOLOGY	ASAHARA, Y; TANAKA, T; KAMIOKA, H; NISHIMURA, A; YAMAZAKI, T	GH93	24.0023	175.109	-1		3.02		TIMS-ID	SEDIMENTARY	UNKNOWN	UNKNOWN	SILICICLASTIC
HAKGH93-1/352-353		SEDDB	10.1016/S0009-2541(99)00056-X	PROVENANCE OF NORTH PACIFIC SEDIMENTS AND PROCESS OF SOURCE MATERIAL TRANSPORT AS DERIVED FROM Rb-Sr ISOTOPIC SYTEMATICS	CHEMICAL GEOLOGY	ASAHARA, Y; TANAKA, T; KAMIOKA, H; NISHIMURA, A; YAMAZAKI, T	GH93	24.0023	175.109	-1		3.02		TIMS	SEDIMENTARY	UNKNOWN	UNKNOWN	SILICICLASTIC
P75/400-401		SEDDB	10.1016/S0009-2541(99)00056-X	PROVENANCE OF NORTH PACIFIC SEDIMENTS AND PROCESS OF SOURCE MATERIAL TRANSPORT AS DERIVED FROM Rb-Sr ISOTOPIC SYTEMATICS	CHEMICAL GEOLOGY	ASAHARA, Y; TANAKA, T; KAMIOKA, H; NISHIMURA, A; YAMAZAKI, T	UNKNOWN	36.7117	143.217	-1	0		1.806	TIMS-ID	SEDIMENTARY	UNKNOWN	UNKNOWN	SILICICLASTIC
P75/400-401		SEDDB	10.1016/S0009-2541(99)00056-X	PROVENANCE OF NORTH PACIFIC SEDIMENTS AND PROCESS OF SOURCE MATERIAL TRANSPORT AS DERIVED FROM Rb-Sr ISOTOPIC SYTEMATICS	CHEMICAL GEOLOGY	ASAHARA, Y; TANAKA, T; KAMIOKA, H; NISHIMURA, A; YAMAZAKI, T	UNKNOWN	36.7117	143.217	-1	0		1.806	TIMS	SEDIMENTARY	UNKNOWN	UNKNOWN	SILICICLASTIC
NP15/611.5-612.5		SEDDB	10.1016/S0009-2541(99)00056-X	PROVENANCE OF NORTH PACIFIC SEDIMENTS AND PROCESS OF SOURCE MATERIAL TRANSPORT AS DERIVED FROM Rb-Sr ISOTOPIC SYTEMATICS	CHEMICAL GEOLOGY	ASAHARA, Y; TANAKA, T; KAMIOKA, H; NISHIMURA, A; YAMAZAKI, T	UNKNOWN	23.9428	135.001	-1		1.206		TIMS-ID	SEDIMENTARY	UNKNOWN	UNKNOWN	SILICICLASTIC
NP15/611.5-612.5		SEDDB	10.1016/S0009-2541(99)00056-X	PROVENANCE OF NORTH PACIFIC SEDIMENTS AND PROCESS OF SOURCE MATERIAL TRANSPORT AS DERIVED FROM Rb-Sr ISOTOPIC SYTEMATICS	CHEMICAL GEOLOGY	ASAHARA, Y; TANAKA, T; KAMIOKA, H; NISHIMURA, A; YAMAZAKI, T	UNKNOWN	23.9428	135.001	-1		1.206		TIMS	SEDIMENTARY	UNKNOWN	UNKNOWN	SILICICLASTIC
NP16/562-563		SEDDB	10.1016/S0009-2541(99)00056-X	PROVENANCE OF NORTH PACIFIC SEDIMENTS AND PROCESS OF SOURCE MATERIAL TRANSPORT AS DERIVED FROM Rb-Sr ISOTOPIC SYTEMATICS	CHEMICAL GEOLOGY	ASAHARA, Y; TANAKA, T; KAMIOKA, H; NISHIMURA, A; YAMAZAKI, T	UNKNOWN	19.9932	-162.494	-1		1.862		TIMS-ID	SEDIMENTARY	UNKNOWN	UNKNOWN	SILICICLASTIC
NP16/562-563		SEDDB	10.1016/S0009-2541(99)00056-X	PROVENANCE OF NORTH PACIFIC SEDIMENTS AND PROCESS OF SOURCE MATERIAL TRANSPORT AS DERIVED FROM Rb-Sr ISOTOPIC SYTEMATICS	CHEMICAL GEOLOGY	ASAHARA, Y; TANAKA, T; KAMIOKA, H; NISHIMURA, A; YAMAZAKI, T	UNKNOWN	19.9932	-162.494	-1		1.862		TIMS	SEDIMENTARY	UNKNOWN	UNKNOWN	SILICICLASTIC
NP18/0-1		SEDDB	10.1016/S0009-2541(99)00056-X	PROVENANCE OF NORTH PACIFIC SEDIMENTS AND PROCESS OF SOURCE MATERIAL TRANSPORT AS DERIVED FROM Rb-Sr ISOTOPIC SYTEMATICS	CHEMICAL GEOLOGY	ASAHARA, Y; TANAKA, T; KAMIOKA, H; NISHIMURA, A; YAMAZAKI, T	UNKNOWN	20	-175.118	-1		0.008		TIMS-ID	SEDIMENTARY	UNKNOWN	UNKNOWN	SILICICLASTIC
NP18/0-1		SEDDB	10.1016/S0009-2541(99)00056-X	PROVENANCE OF NORTH PACIFIC SEDIMENTS AND PROCESS OF SOURCE MATERIAL TRANSPORT AS DERIVED FROM Rb-Sr ISOTOPIC SYTEMATICS	CHEMICAL GEOLOGY	ASAHARA, Y; TANAKA, T; KAMIOKA, H; NISHIMURA, A; YAMAZAKI, T	UNKNOWN	20	-175.118	-1		0.008		TIMS	SEDIMENTARY	UNKNOWN	UNKNOWN	SILICICLASTIC
NP18/62-63		SEDDB	10.1016/S0009-2541(99)00056-X	PROVENANCE OF NORTH PACIFIC SEDIMENTS AND PROCESS OF SOURCE MATERIAL TRANSPORT AS DERIVED FROM Rb-Sr ISOTOPIC SYTEMATICS	CHEMICAL GEOLOGY	ASAHARA, Y; TANAKA, T; KAMIOKA, H; NISHIMURA, A; YAMAZAKI, T	UNKNOWN	20	-175.118	-1		1.162		TIMS-ID	SEDIMENTARY	UNKNOWN	UNKNOWN	SILICICLASTIC
NP18/62-63		SEDDB	10.1016/S0009-2541(99)00056-X	PROVENANCE OF NORTH PACIFIC SEDIMENTS AND PROCESS OF SOURCE MATERIAL TRANSPORT AS DERIVED FROM Rb-Sr ISOTOPIC SYTEMATICS	CHEMICAL GEOLOGY	ASAHARA, Y; TANAKA, T; KAMIOKA, H; NISHIMURA, A; YAMAZAKI, T	UNKNOWN	20	-175.118	-1		1.162		TIMS	SEDIMENTARY	UNKNOWN	UNKNOWN	SILICICLASTIC
NP29/12-13		SEDDB	10.1016/S0009-2541(99)00056-X	PROVENANCE OF NORTH PACIFIC SEDIMENTS AND PROCESS OF SOURCE MATERIAL TRANSPORT AS DERIVED FROM Rb-Sr ISOTOPIC SYTEMATICS	CHEMICAL GEOLOGY	ASAHARA, Y; TANAKA, T; KAMIOKA, H; NISHIMURA, A; YAMAZAKI, T	UNKNOWN	19.9987	153.482	-1		0.333		TIMS-ID	SEDIMENTARY	UNKNOWN	UNKNOWN	SILICICLASTIC
NP29/12-13		SEDDB	10.1016/S0009-2541(99)00056-X	PROVENANCE OF NORTH PACIFIC SEDIMENTS AND PROCESS OF SOURCE MATERIAL TRANSPORT AS DERIVED FROM Rb-Sr ISOTOPIC SYTEMATICS	CHEMICAL GEOLOGY	ASAHARA, Y; TANAKA, T; KAMIOKA, H; NISHIMURA, A; YAMAZAKI, T	UNKNOWN	19.9987	153.482	-1		0.333		TIMS	SEDIMENTARY	UNKNOWN	UNKNOWN	SILICICLASTIC
NP29/118-119		SEDDB	10.1016/S0009-2541(99)00056-X	PROVENANCE OF NORTH PACIFIC SEDIMENTS AND PROCESS OF SOURCE MATERIAL TRANSPORT AS DERIVED FROM Rb-Sr ISOTOPIC SYTEMATICS	CHEMICAL GEOLOGY	ASAHARA, Y; TANAKA, T; KAMIOKA, H; NISHIMURA, A; YAMAZAKI, T	UNKNOWN	19.9987	153.482	-1		2.009		TIMS-ID	SEDIMENTARY	UNKNOWN	UNKNOWN	SILICICLASTIC
NP29/118-119		SEDDB	10.1016/S0009-2541(99)00056-X	PROVENANCE OF NORTH PACIFIC SEDIMENTS AND PROCESS OF SOURCE MATERIAL TRANSPORT AS DERIVED FROM Rb-Sr ISOTOPIC SYTEMATICS	CHEMICAL GEOLOGY	ASAHARA, Y; TANAKA, T; KAMIOKA, H; NISHIMURA, A; YAMAZAKI, T	UNKNOWN	19.9987	153.482	-1		2.009		TIMS	SEDIMENTARY	UNKNOWN	UNKNOWN	SILICICLASTIC
NGC47/322-323		SEDDB	10.1016/S0009-2541(99)00056-X	PROVENANCE OF NORTH PACIFIC SEDIMENTS AND PROCESS OF SOURCE MATERIAL TRANSPORT AS DERIVED FROM Rb-Sr ISOTOPIC SYTEMATICS	CHEMICAL GEOLOGY	ASAHARA, Y; TANAKA, T; KAMIOKA, H; NISHIMURA, A; YAMAZAKI, T	UNKNOWN	7.929	174.999	-1		2.167		TIMS-ID	SEDIMENTARY	UNKNOWN	UNKNOWN	SILICICLASTIC
NGC47/322-323		SEDDB	10.1016/S0009-2541(99)00056-X	PROVENANCE OF NORTH PACIFIC SEDIMENTS AND PROCESS OF SOURCE MATERIAL TRANSPORT AS DERIVED FROM Rb-Sr ISOTOPIC SYTEMATICS	CHEMICAL GEOLOGY	ASAHARA, Y; TANAKA, T; KAMIOKA, H; NISHIMURA, A; YAMAZAKI, T	UNKNOWN	7.929	174.999	-1		2.167		TIMS	SEDIMENTARY	UNKNOWN	UNKNOWN	SILICICLASTIC
HAKGH93-1/6-7		SEDDB	10.1016/S0009-2541(99)00056-X	PROVENANCE OF NORTH PACIFIC SEDIMENTS AND PROCESS OF SOURCE MATERIAL TRANSPORT AS DERIVED FROM Rb-Sr ISOTOPIC SYTEMATICS	CHEMICAL GEOLOGY	ASAHARA, Y; TANAKA, T; KAMIOKA, H; NISHIMURA, A; YAMAZAKI, T	GH93	24.0023	175.109	-1		0.047		TIMS-ID	SEDIMENTARY	UNKNOWN	UNKNOWN	SILICICLASTIC
HAKGH93-1/6-7		SEDDB	10.1016/S0009-2541(99)00056-X	PROVENANCE OF NORTH PACIFIC SEDIMENTS AND PROCESS OF SOURCE MATERIAL TRANSPORT AS DERIVED FROM Rb-Sr ISOTOPIC SYTEMATICS	CHEMICAL GEOLOGY	ASAHARA, Y; TANAKA, T; KAMIOKA, H; NISHIMURA, A; YAMAZAKI, T	GH93	24.0023	175.109	-1		0.047		TIMS	SEDIMENTARY	UNKNOWN	UNKNOWN	SILICICLASTIC
HAKGH93-1/40-41		SEDDB	10.1016/S0009-2541(99)00056-X	PROVENANCE OF NORTH PACIFIC SEDIMENTS AND PROCESS OF SOURCE MATERIAL TRANSPORT AS DERIVED FROM Rb-Sr ISOTOPIC SYTEMATICS	CHEMICAL GEOLOGY	ASAHARA, Y; TANAKA, T; KAMIOKA, H; NISHIMURA, A; YAMAZAKI, T	GH93	24.0023	175.109	-1		0.295		TIMS-ID	SEDIMENTARY	UNKNOWN	UNKNOWN	SILICICLASTIC
HAKGH93-1/40-41		SEDDB	10.1016/S0009-2541(99)00056-X	PROVENANCE OF NORTH PACIFIC SEDIMENTS AND PROCESS OF SOURCE MATERIAL TRANSPORT AS DERIVED FROM Rb-Sr ISOTOPIC SYTEMATICS	CHEMICAL GEOLOGY	ASAHARA, Y; TANAKA, T; KAMIOKA, H; NISHIMURA, A; YAMAZAKI, T	GH93	24.0023	175.109	-1		0.295		TIMS	SEDIMENTARY	UNKNOWN	UNKNOWN	SILICICLASTIC
HAKGH93-1/226-227		SEDDB	10.1016/S0009-2541(99)00056-X	PROVENANCE OF NORTH PACIFIC SEDIMENTS AND PROCESS OF SOURCE MATERIAL TRANSPORT AS DERIVED FROM Rb-Sr ISOTOPIC SYTEMATICS	CHEMICAL GEOLOGY	ASAHARA, Y; TANAKA, T; KAMIOKA, H; NISHIMURA, A; YAMAZAKI, T	GH93	24.0023	175.109	-1		1.766		TIMS-ID	SEDIMENTARY	UNKNOWN	UNKNOWN	SILICICLASTIC
HAKGH93-1/226-227		SEDDB	10.1016/S0009-2541(99)00056-X	PROVENANCE OF NORTH PACIFIC SEDIMENTS AND PROCESS OF SOURCE MATERIAL TRANSPORT AS DERIVED FROM Rb-Sr ISOTOPIC SYTEMATICS	CHEMICAL GEOLOGY	ASAHARA, Y; TANAKA, T; KAMIOKA, H; NISHIMURA, A; YAMAZAKI, T	GH93	24.0023	175.109	-1		1.766		TIMS	SEDIMENTARY	UNKNOWN	UNKNOWN	SILICICLASTIC
P75/65-66		SEDDB	10.1016/S0009-2541(99)00056-X	PROVENANCE OF NORTH PACIFIC SEDIMENTS AND PROCESS OF SOURCE MATERIAL TRANSPORT AS DERIVED FROM Rb-Sr ISOTOPIC SYTEMATICS	CHEMICAL GEOLOGY	ASAHARA, Y; TANAKA, T; KAMIOKA, H; NISHIMURA, A; YAMAZAKI, T	UNKNOWN	36.7117	143.217	-1	0		1.806	TIMS-ID	SEDIMENTARY	UNKNOWN	UNKNOWN	SILICICLASTIC
P75/65-66		SEDDB	10.1016/S0009-2541(99)00056-X	PROVENANCE OF NORTH PACIFIC SEDIMENTS AND PROCESS OF SOURCE MATERIAL TRANSPORT AS DERIVED FROM Rb-Sr ISOTOPIC SYTEMATICS	CHEMICAL GEOLOGY	ASAHARA, Y; TANAKA, T; KAMIOKA, H; NISHIMURA, A; YAMAZAKI, T	UNKNOWN	36.7117	143.217	-1	0		1.806	TIMS	SEDIMENTARY	UNKNOWN	UNKNOWN	SILICICLASTIC
HAKGH92-703/270-271		SEDDB	10.1016/S0009-2541(99)00056-X	PROVENANCE OF NORTH PACIFIC SEDIMENTS AND PROCESS OF SOURCE MATERIAL TRANSPORT AS DERIVED FROM Rb-Sr ISOTOPIC SYTEMATICS	CHEMICAL GEOLOGY	ASAHARA, Y; TANAKA, T; KAMIOKA, H; NISHIMURA, A; YAMAZAKI, T	GH92	39.494	136.5	-1	0		1.806	TIMS-ID	SEDIMENTARY	UNKNOWN	UNKNOWN	SILICICLASTIC
HAKGH92-703/270-271		SEDDB	10.1016/S0009-2541(99)00056-X	PROVENANCE OF NORTH PACIFIC SEDIMENTS AND PROCESS OF SOURCE MATERIAL TRANSPORT AS DERIVED FROM Rb-Sr ISOTOPIC SYTEMATICS	CHEMICAL GEOLOGY	ASAHARA, Y; TANAKA, T; KAMIOKA, H; NISHIMURA, A; YAMAZAKI, T	GH92	39.494	136.5	-1	0		1.806	TIMS	SEDIMENTARY	UNKNOWN	UNKNOWN	SILICICLASTIC
NP15/531.5-532.5		SEDDB	10.1016/S0009-2541(99)00056-X	PROVENANCE OF NORTH PACIFIC SEDIMENTS AND PROCESS OF SOURCE MATERIAL TRANSPORT AS DERIVED FROM Rb-Sr ISOTOPIC SYTEMATICS	CHEMICAL GEOLOGY	ASAHARA, Y; TANAKA, T; KAMIOKA, H; NISHIMURA, A; YAMAZAKI, T	UNKNOWN	23.9428	135.001	-1		1.058		TIMS-ID	SEDIMENTARY	UNKNOWN	UNKNOWN	SILICICLASTIC
NP15/531.5-532.5		SEDDB	10.1016/S0009-2541(99)00056-X	PROVENANCE OF NORTH PACIFIC SEDIMENTS AND PROCESS OF SOURCE MATERIAL TRANSPORT AS DERIVED FROM Rb-Sr ISOTOPIC SYTEMATICS	CHEMICAL GEOLOGY	ASAHARA, Y; TANAKA, T; KAMIOKA, H; NISHIMURA, A; YAMAZAKI, T	UNKNOWN	23.9428	135.001	-1		1.058		TIMS	SEDIMENTARY	UNKNOWN	UNKNOWN	SILICICLASTIC
NP16/602-603		SEDDB	10.1016/S0009-2541(99)00056-X	PROVENANCE OF NORTH PACIFIC SEDIMENTS AND PROCESS OF SOURCE MATERIAL TRANSPORT AS DERIVED FROM Rb-Sr ISOTOPIC SYTEMATICS	CHEMICAL GEOLOGY	ASAHARA, Y; TANAKA, T; KAMIOKA, H; NISHIMURA, A; YAMAZAKI, T	UNKNOWN	19.9932	-162.494	-1		2.014		TIMS-ID	SEDIMENTARY	UNKNOWN	UNKNOWN	SILICICLASTIC
NP16/602-603		SEDDB	10.1016/S0009-2541(99)00056-X	PROVENANCE OF NORTH PACIFIC SEDIMENTS AND PROCESS OF SOURCE MATERIAL TRANSPORT AS DERIVED FROM Rb-Sr ISOTOPIC SYTEMATICS	CHEMICAL GEOLOGY	ASAHARA, Y; TANAKA, T; KAMIOKA, H; NISHIMURA, A; YAMAZAKI, T	UNKNOWN	19.9932	-162.494	-1		2.014		TIMS	SEDIMENTARY	UNKNOWN	UNKNOWN	SILICICLASTIC
NP27/240-241		SEDDB	10.1016/S0009-2541(99)00056-X	PROVENANCE OF NORTH PACIFIC SEDIMENTS AND PROCESS OF SOURCE MATERIAL TRANSPORT AS DERIVED FROM Rb-Sr ISOTOPIC SYTEMATICS	CHEMICAL GEOLOGY	ASAHARA, Y; TANAKA, T; KAMIOKA, H; NISHIMURA, A; YAMAZAKI, T	UNKNOWN	19.998	158.498	-1		3.213		TIMS-ID	SEDIMENTARY	UNKNOWN	UNKNOWN	SILICICLASTIC
NP27/240-241		SEDDB	10.1016/S0009-2541(99)00056-X	PROVENANCE OF NORTH PACIFIC SEDIMENTS AND PROCESS OF SOURCE MATERIAL TRANSPORT AS DERIVED FROM Rb-Sr ISOTOPIC SYTEMATICS	CHEMICAL GEOLOGY	ASAHARA, Y; TANAKA, T; KAMIOKA, H; NISHIMURA, A; YAMAZAKI, T	UNKNOWN	19.998	158.498	-1		3.213		TIMS	SEDIMENTARY	UNKNOWN	UNKNOWN	SILICICLASTIC
NP27/600-601		SEDDB	10.1016/S0009-2541(99)00056-X	PROVENANCE OF NORTH PACIFIC SEDIMENTS AND PROCESS OF SOURCE MATERIAL TRANSPORT AS DERIVED FROM Rb-Sr ISOTOPIC SYTEMATICS	CHEMICAL GEOLOGY	ASAHARA, Y; TANAKA, T; KAMIOKA, H; NISHIMURA, A; YAMAZAKI, T	UNKNOWN	19.998	158.498	-1		6.3		TIMS-ID	SEDIMENTARY	UNKNOWN	UNKNOWN	SILICICLASTIC
NP27/600-601		SEDDB	10.1016/S0009-2541(99)00056-X	PROVENANCE OF NORTH PACIFIC SEDIMENTS AND PROCESS OF SOURCE MATERIAL TRANSPORT AS DERIVED FROM Rb-Sr ISOTOPIC SYTEMATICS	CHEMICAL GEOLOGY	ASAHARA, Y; TANAKA, T; KAMIOKA, H; NISHIMURA, A; YAMAZAKI, T	UNKNOWN	19.998	158.498	-1		6.3		TIMS	SEDIMENTARY	UNKNOWN	UNKNOWN	SILICICLASTIC
NP29/200-201		SEDDB	10.1016/S0009-2541(99)00056-X	PROVENANCE OF NORTH PACIFIC SEDIMENTS AND PROCESS OF SOURCE MATERIAL TRANSPORT AS DERIVED FROM Rb-Sr ISOTOPIC SYTEMATICS	CHEMICAL GEOLOGY	ASAHARA, Y; TANAKA, T; KAMIOKA, H; NISHIMURA, A; YAMAZAKI, T	UNKNOWN	19.9987	153.482	-1		2.737		TIMS-ID	SEDIMENTARY	UNKNOWN	UNKNOWN	SILICICLASTIC
NP29/200-201		SEDDB	10.1016/S0009-2541(99)00056-X	PROVENANCE OF NORTH PACIFIC SEDIMENTS AND PROCESS OF SOURCE MATERIAL TRANSPORT AS DERIVED FROM Rb-Sr ISOTOPIC SYTEMATICS	CHEMICAL GEOLOGY	ASAHARA, Y; TANAKA, T; KAMIOKA, H; NISHIMURA, A; YAMAZAKI, T	UNKNOWN	19.9987	153.482	-1		2.737		TIMS	SEDIMENTARY	UNKNOWN	UNKNOWN	SILICICLASTIC
NGC47/362-363		SEDDB	10.1016/S0009-2541(99)00056-X	PROVENANCE OF NORTH PACIFIC SEDIMENTS AND PROCESS OF SOURCE MATERIAL TRANSPORT AS DERIVED FROM Rb-Sr ISOTOPIC SYTEMATICS	CHEMICAL GEOLOGY	ASAHARA, Y; TANAKA, T; KAMIOKA, H; NISHIMURA, A; YAMAZAKI, T	UNKNOWN	7.929	174.999	-1		2.482		TIMS-ID	SEDIMENTARY	UNKNOWN	UNKNOWN	SILICICLASTIC
NGC47/362-363		SEDDB	10.1016/S0009-2541(99)00056-X	PROVENANCE OF NORTH PACIFIC SEDIMENTS AND PROCESS OF SOURCE MATERIAL TRANSPORT AS DERIVED FROM Rb-Sr ISOTOPIC SYTEMATICS	CHEMICAL GEOLOGY	ASAHARA, Y; TANAKA, T; KAMIOKA, H; NISHIMURA, A; YAMAZAKI, T	UNKNOWN	7.929	174.999	-1		2.482		TIMS	SEDIMENTARY	UNKNOWN	UNKNOWN	SILICICLASTIC
NGC47/402-403		SEDDB	10.1016/S0009-2541(99)00056-X	PROVENANCE OF NORTH PACIFIC SEDIMENTS AND PROCESS OF SOURCE MATERIAL TRANSPORT AS DERIVED FROM Rb-Sr ISOTOPIC SYTEMATICS	CHEMICAL GEOLOGY	ASAHARA, Y; TANAKA, T; KAMIOKA, H; NISHIMURA, A; YAMAZAKI, T	UNKNOWN	7.929	174.999	-1		2.942		TIMS-ID	SEDIMENTARY	UNKNOWN	UNKNOWN	SILICICLASTIC
NGC47/402-403		SEDDB	10.1016/S0009-2541(99)00056-X	PROVENANCE OF NORTH PACIFIC SEDIMENTS AND PROCESS OF SOURCE MATERIAL TRANSPORT AS DERIVED FROM Rb-Sr ISOTOPIC SYTEMATICS	CHEMICAL GEOLOGY	ASAHARA, Y; TANAKA, T; KAMIOKA, H; NISHIMURA, A; YAMAZAKI, T	UNKNOWN	7.929	174.999	-1		2.942		TIMS	SEDIMENTARY	UNKNOWN	UNKNOWN	SILICICLASTIC
HAKGH93-1/3-4		SEDDB	10.1016/S0009-2541(99)00056-X	PROVENANCE OF NORTH PACIFIC SEDIMENTS AND PROCESS OF SOURCE MATERIAL TRANSPORT AS DERIVED FROM Rb-Sr ISOTOPIC SYTEMATICS	CHEMICAL GEOLOGY	ASAHARA, Y; TANAKA, T; KAMIOKA, H; NISHIMURA, A; YAMAZAKI, T	GH93	24.0023	175.109	-1		0.026		TIMS-ID	SEDIMENTARY	UNKNOWN	UNKNOWN	SILICICLASTIC
HAKGH93-1/3-4		SEDDB	10.1016/S0009-2541(99)00056-X	PROVENANCE OF NORTH PACIFIC SEDIMENTS AND PROCESS OF SOURCE MATERIAL TRANSPORT AS DERIVED FROM Rb-Sr ISOTOPIC SYTEMATICS	CHEMICAL GEOLOGY	ASAHARA, Y; TANAKA, T; KAMIOKA, H; NISHIMURA, A; YAMAZAKI, T	GH93	24.0023	175.109	-1		0.026		TIMS	SEDIMENTARY	UNKNOWN	UNKNOWN	SILICICLASTIC
NGC47/82-83		SEDDB	10.1016/S0009-2541(99)00056-X	PROVENANCE OF NORTH PACIFIC SEDIMENTS AND PROCESS OF SOURCE MATERIAL TRANSPORT AS DERIVED FROM Rb-Sr ISOTOPIC SYTEMATICS	CHEMICAL GEOLOGY	ASAHARA, Y; TANAKA, T; KAMIOKA, H; NISHIMURA, A; YAMAZAKI, T	UNKNOWN	7.929	174.999	-1		0.795		TIMS-ID	SEDIMENTARY	UNKNOWN	UNKNOWN	SILICICLASTIC
NGC47/82-83		SEDDB	10.1016/S0009-2541(99)00056-X	PROVENANCE OF NORTH PACIFIC SEDIMENTS AND PROCESS OF SOURCE MATERIAL TRANSPORT AS DERIVED FROM Rb-Sr ISOTOPIC SYTEMATICS	CHEMICAL GEOLOGY	ASAHARA, Y; TANAKA, T; KAMIOKA, H; NISHIMURA, A; YAMAZAKI, T	UNKNOWN	7.929	174.999	-1		0.795		TIMS	SEDIMENTARY	UNKNOWN	UNKNOWN	SILICICLASTIC
HAKGH93-1/120-121		SEDDB	10.1016/S0009-2541(99)00056-X	PROVENANCE OF NORTH PACIFIC SEDIMENTS AND PROCESS OF SOURCE MATERIAL TRANSPORT AS DERIVED FROM Rb-Sr ISOTOPIC SYTEMATICS	CHEMICAL GEOLOGY	ASAHARA, Y; TANAKA, T; KAMIOKA, H; NISHIMURA, A; YAMAZAKI, T	GH93	24.0023	175.109	-1		0.878		TIMS-ID	SEDIMENTARY	UNKNOWN	UNKNOWN	SILICICLASTIC
HAKGH93-1/120-121		SEDDB	10.1016/S0009-2541(99)00056-X	PROVENANCE OF NORTH PACIFIC SEDIMENTS AND PROCESS OF SOURCE MATERIAL TRANSPORT AS DERIVED FROM Rb-Sr ISOTOPIC SYTEMATICS	CHEMICAL GEOLOGY	ASAHARA, Y; TANAKA, T; KAMIOKA, H; NISHIMURA, A; YAMAZAKI, T	GH93	24.0023	175.109	-1		0.878		TIMS	SEDIMENTARY	UNKNOWN	UNKNOWN	SILICICLASTIC
HAKGH93-1/312-313		SEDDB	10.1016/S0009-2541(99)00056-X	PROVENANCE OF NORTH PACIFIC SEDIMENTS AND PROCESS OF SOURCE MATERIAL TRANSPORT AS DERIVED FROM Rb-Sr ISOTOPIC SYTEMATICS	CHEMICAL GEOLOGY	ASAHARA, Y; TANAKA, T; KAMIOKA, H; NISHIMURA, A; YAMAZAKI, T	GH93	24.0023	175.109	-1		2.649		TIMS-ID	SEDIMENTARY	UNKNOWN	UNKNOWN	SILICICLASTIC
HAKGH93-1/312-313		SEDDB	10.1016/S0009-2541(99)00056-X	PROVENANCE OF NORTH PACIFIC SEDIMENTS AND PROCESS OF SOURCE MATERIAL TRANSPORT AS DERIVED FROM Rb-Sr ISOTOPIC SYTEMATICS	CHEMICAL GEOLOGY	ASAHARA, Y; TANAKA, T; KAMIOKA, H; NISHIMURA, A; YAMAZAKI, T	GH93	24.0023	175.109	-1		2.649		TIMS	SEDIMENTARY	UNKNOWN	UNKNOWN	SILICICLASTIC
P75/200-201		SEDDB	10.1016/S0009-2541(99)00056-X	PROVENANCE OF NORTH PACIFIC SEDIMENTS AND PROCESS OF SOURCE MATERIAL TRANSPORT AS DERIVED FROM Rb-Sr ISOTOPIC SYTEMATICS	CHEMICAL GEOLOGY	ASAHARA, Y; TANAKA, T; KAMIOKA, H; NISHIMURA, A; YAMAZAKI, T	UNKNOWN	36.7117	143.217	-1	0		1.806	TIMS-ID	SEDIMENTARY	UNKNOWN	UNKNOWN	SILICICLASTIC
P75/200-201		SEDDB	10.1016/S0009-2541(99)00056-X	PROVENANCE OF NORTH PACIFIC SEDIMENTS AND PROCESS OF SOURCE MATERIAL TRANSPORT AS DERIVED FROM Rb-Sr ISOTOPIC SYTEMATICS	CHEMICAL GEOLOGY	ASAHARA, Y; TANAKA, T; KAMIOKA, H; NISHIMURA, A; YAMAZAKI, T	UNKNOWN	36.7117	143.217	-1	0		1.806	TIMS	SEDIMENTARY	UNKNOWN	UNKNOWN	SILICICLASTIC
P75/259-260		SEDDB	10.1016/S0009-2541(99)00056-X	PROVENANCE OF NORTH PACIFIC SEDIMENTS AND PROCESS OF SOURCE MATERIAL TRANSPORT AS DERIVED FROM Rb-Sr ISOTOPIC SYTEMATICS	CHEMICAL GEOLOGY	ASAHARA, Y; TANAKA, T; KAMIOKA, H; NISHIMURA, A; YAMAZAKI, T	UNKNOWN	36.7117	143.217	-1	0		1.806	TIMS-ID	SEDIMENTARY	UNKNOWN	UNKNOWN	SILICICLASTIC
P75/259-260		SEDDB	10.1016/S0009-2541(99)00056-X	PROVENANCE OF NORTH PACIFIC SEDIMENTS AND PROCESS OF SOURCE MATERIAL TRANSPORT AS DERIVED FROM Rb-Sr ISOTOPIC SYTEMATICS	CHEMICAL GEOLOGY	ASAHARA, Y; TANAKA, T; KAMIOKA, H; NISHIMURA, A; YAMAZAKI, T	UNKNOWN	36.7117	143.217	-1	0		1.806	TIMS	SEDIMENTARY	UNKNOWN	UNKNOWN	SILICICLASTIC
P75/460-461		SEDDB	10.1016/S0009-2541(99)00056-X	PROVENANCE OF NORTH PACIFIC SEDIMENTS AND PROCESS OF SOURCE MATERIAL TRANSPORT AS DERIVED FROM Rb-Sr ISOTOPIC SYTEMATICS	CHEMICAL GEOLOGY	ASAHARA, Y; TANAKA, T; KAMIOKA, H; NISHIMURA, A; YAMAZAKI, T	UNKNOWN	36.7117	143.217	-1	0		1.806	TIMS-ID	SEDIMENTARY	UNKNOWN	UNKNOWN	SILICICLASTIC
P75/460-461		SEDDB	10.1016/S0009-2541(99)00056-X	PROVENANCE OF NORTH PACIFIC SEDIMENTS AND PROCESS OF SOURCE MATERIAL TRANSPORT AS DERIVED FROM Rb-Sr ISOTOPIC SYTEMATICS	CHEMICAL GEOLOGY	ASAHARA, Y; TANAKA, T; KAMIOKA, H; NISHIMURA, A; YAMAZAKI, T	UNKNOWN	36.7117	143.217	-1	0		1.806	TIMS	SEDIMENTARY	UNKNOWN	UNKNOWN	SILICICLASTIC
HAK9403-LM9/520		SEDDB	10.1016/S0012-821X(01)00244-8	BORON CONTENTS OF JAPAN TRENCH SEDIMENTS AND IWATE BASALTIC LAVAS, NORTHEAST JAPAN ARC: ESTIMATION OF SEDIMENT-DERIVED FLUID CONTRIBUTION IN MANTLE WEDGE	EARTH PLANET SCI LETT	SANO, T; HASENAKA, T; SHIMAOKA, A; YONEZAWA, C; FUKUOKA, T	KH94-3	40.4648	144.489	-1				XRF	SEDIMENTARY	UNKNOWN	UNKNOWN	SILICICLASTIC												1.96
HAK9403-LM9/520		SEDDB	10.1016/S0012-821X(01)00244-8	BORON CONTENTS OF JAPAN TRENCH SEDIMENTS AND IWATE BASALTIC LAVAS, NORTHEAST JAPAN ARC: ESTIMATION OF SEDIMENT-DERIVED FLUID CONTRIBUTION IN MANTLE WEDGE	EARTH PLANET SCI LETT	SANO, T; HASENAKA, T; SHIMAOKA, A; YONEZAWA, C; FUKUOKA, T	KH94-3	40.4648	144.489	-1				RNAA	SEDIMENTARY	UNKNOWN	UNKNOWN	SILICICLASTIC																							3.64		4.12
HAK9403-LM9/180		SEDDB	10.1016/S0012-821X(01)00244-8	BORON CONTENTS OF JAPAN TRENCH SEDIMENTS AND IWATE BASALTIC LAVAS, NORTHEAST JAPAN ARC: ESTIMATION OF SEDIMENT-DERIVED FLUID CONTRIBUTION IN MANTLE WEDGE	EARTH PLANET SCI LETT	SANO, T; HASENAKA, T; SHIMAOKA, A; YONEZAWA, C; FUKUOKA, T	KH94-3	40.4648	144.489	-1				XRF	SEDIMENTARY	UNKNOWN	UNKNOWN	SILICICLASTIC												1.93
HAK9403-LM9/180		SEDDB	10.1016/S0012-821X(01)00244-8	BORON CONTENTS OF JAPAN TRENCH SEDIMENTS AND IWATE BASALTIC LAVAS, NORTHEAST JAPAN ARC: ESTIMATION OF SEDIMENT-DERIVED FLUID CONTRIBUTION IN MANTLE WEDGE	EARTH PLANET SCI LETT	SANO, T; HASENAKA, T; SHIMAOKA, A; YONEZAWA, C; FUKUOKA, T	KH94-3	40.4648	144.489	-1				RNAA	SEDIMENTARY	UNKNOWN	UNKNOWN	SILICICLASTIC																							3.61		3.13
HAK9403-LM9/220		SEDDB	10.1016/S0012-821X(01)00244-8	BORON CONTENTS OF JAPAN TRENCH SEDIMENTS AND IWATE BASALTIC LAVAS, NORTHEAST JAPAN ARC: ESTIMATION OF SEDIMENT-DERIVED FLUID CONTRIBUTION IN MANTLE WEDGE	EARTH PLANET SCI LETT	SANO, T; HASENAKA, T; SHIMAOKA, A; YONEZAWA, C; FUKUOKA, T	KH94-3	40.4648	144.489	-1				XRF	SEDIMENTARY	UNKNOWN	UNKNOWN	SILICICLASTIC												1.94
HAK9403-LM9/220		SEDDB	10.1016/S0012-821X(01)00244-8	BORON CONTENTS OF JAPAN TRENCH SEDIMENTS AND IWATE BASALTIC LAVAS, NORTHEAST JAPAN ARC: ESTIMATION OF SEDIMENT-DERIVED FLUID CONTRIBUTION IN MANTLE WEDGE	EARTH PLANET SCI LETT	SANO, T; HASENAKA, T; SHIMAOKA, A; YONEZAWA, C; FUKUOKA, T	KH94-3	40.4648	144.489	-1				RNAA	SEDIMENTARY	UNKNOWN	UNKNOWN	SILICICLASTIC																							3.57		3.07
HAK9403-LM9/700		SEDDB	10.1016/S0012-821X(01)00244-8	BORON CONTENTS OF JAPAN TRENCH SEDIMENTS AND IWATE BASALTIC LAVAS, NORTHEAST JAPAN ARC: ESTIMATION OF SEDIMENT-DERIVED FLUID CONTRIBUTION IN MANTLE WEDGE	EARTH PLANET SCI LETT	SANO, T; HASENAKA, T; SHIMAOKA, A; YONEZAWA, C; FUKUOKA, T	KH94-3	40.4648	144.489	-1				XRF	SEDIMENTARY	UNKNOWN	UNKNOWN	SILICICLASTIC												1.87
HAK9403-LM9/700		SEDDB	10.1016/S0012-821X(01)00244-8	BORON CONTENTS OF JAPAN TRENCH SEDIMENTS AND IWATE BASALTIC LAVAS, NORTHEAST JAPAN ARC: ESTIMATION OF SEDIMENT-DERIVED FLUID CONTRIBUTION IN MANTLE WEDGE	EARTH PLANET SCI LETT	SANO, T; HASENAKA, T; SHIMAOKA, A; YONEZAWA, C; FUKUOKA, T	KH94-3	40.4648	144.489	-1				RNAA	SEDIMENTARY	UNKNOWN	UNKNOWN	SILICICLASTIC																							4.06		3.25
HAK9403-LM9/780		SEDDB	10.1016/S0012-821X(01)00244-8	BORON CONTENTS OF JAPAN TRENCH SEDIMENTS AND IWATE BASALTIC LAVAS, NORTHEAST JAPAN ARC: ESTIMATION OF SEDIMENT-DERIVED FLUID CONTRIBUTION IN MANTLE WEDGE	EARTH PLANET SCI LETT	SANO, T; HASENAKA, T; SHIMAOKA, A; YONEZAWA, C; FUKUOKA, T	KH94-3	40.4648	144.489	-1				XRF	SEDIMENTARY	UNKNOWN	UNKNOWN	SILICICLASTIC												2.14
HAK9403-LM9/780		SEDDB	10.1016/S0012-821X(01)00244-8	BORON CONTENTS OF JAPAN TRENCH SEDIMENTS AND IWATE BASALTIC LAVAS, NORTHEAST JAPAN ARC: ESTIMATION OF SEDIMENT-DERIVED FLUID CONTRIBUTION IN MANTLE WEDGE	EARTH PLANET SCI LETT	SANO, T; HASENAKA, T; SHIMAOKA, A; YONEZAWA, C; FUKUOKA, T	KH94-3	40.4648	144.489	-1				RNAA	SEDIMENTARY	UNKNOWN	UNKNOWN	SILICICLASTIC																							4.78		3.57
HAK9403-LM9/360		SEDDB	10.1016/S0012-821X(01)00244-8	BORON CONTENTS OF JAPAN TRENCH SEDIMENTS AND IWATE BASALTIC LAVAS, NORTHEAST JAPAN ARC: ESTIMATION OF SEDIMENT-DERIVED FLUID CONTRIBUTION IN MANTLE WEDGE	EARTH PLANET SCI LETT	SANO, T; HASENAKA, T; SHIMAOKA, A; YONEZAWA, C; FUKUOKA, T	KH94-3	40.4648	144.489	-1				XRF	SEDIMENTARY	UNKNOWN	UNKNOWN	SILICICLASTIC												1.86
HAK9403-LM9/360		SEDDB	10.1016/S0012-821X(01)00244-8	BORON CONTENTS OF JAPAN TRENCH SEDIMENTS AND IWATE BASALTIC LAVAS, NORTHEAST JAPAN ARC: ESTIMATION OF SEDIMENT-DERIVED FLUID CONTRIBUTION IN MANTLE WEDGE	EARTH PLANET SCI LETT	SANO, T; HASENAKA, T; SHIMAOKA, A; YONEZAWA, C; FUKUOKA, T	KH94-3	40.4648	144.489	-1				RNAA	SEDIMENTARY	UNKNOWN	UNKNOWN	SILICICLASTIC																							3.12		2.77
HAK9403-LM9/580		SEDDB	10.1016/S0012-821X(01)00244-8	BORON CONTENTS OF JAPAN TRENCH SEDIMENTS AND IWATE BASALTIC LAVAS, NORTHEAST JAPAN ARC: ESTIMATION OF SEDIMENT-DERIVED FLUID CONTRIBUTION IN MANTLE WEDGE	EARTH PLANET SCI LETT	SANO, T; HASENAKA, T; SHIMAOKA, A; YONEZAWA, C; FUKUOKA, T	KH94-3	40.4648	144.489	-1				XRF	SEDIMENTARY	UNKNOWN	UNKNOWN	SILICICLASTIC												1.96
HAK9403-LM9/580		SEDDB	10.1016/S0012-821X(01)00244-8	BORON CONTENTS OF JAPAN TRENCH SEDIMENTS AND IWATE BASALTIC LAVAS, NORTHEAST JAPAN ARC: ESTIMATION OF SEDIMENT-DERIVED FLUID CONTRIBUTION IN MANTLE WEDGE	EARTH PLANET SCI LETT	SANO, T; HASENAKA, T; SHIMAOKA, A; YONEZAWA, C; FUKUOKA, T	KH94-3	40.4648	144.489	-1				RNAA	SEDIMENTARY	UNKNOWN	UNKNOWN	SILICICLASTIC																							3.4		2.93
HAK9403-LM9/660		SEDDB	10.1016/S0012-821X(01)00244-8	BORON CONTENTS OF JAPAN TRENCH SEDIMENTS AND IWATE BASALTIC LAVAS, NORTHEAST JAPAN ARC: ESTIMATION OF SEDIMENT-DERIVED FLUID CONTRIBUTION IN MANTLE WEDGE	EARTH PLANET SCI LETT	SANO, T; HASENAKA, T; SHIMAOKA, A; YONEZAWA, C; FUKUOKA, T	KH94-3	40.4648	144.489	-1				XRF	SEDIMENTARY	UNKNOWN	UNKNOWN	SILICICLASTIC												2.04
HAK9403-LM9/660		SEDDB	10.1016/S0012-821X(01)00244-8	BORON CONTENTS OF JAPAN TRENCH SEDIMENTS AND IWATE BASALTIC LAVAS, NORTHEAST JAPAN ARC: ESTIMATION OF SEDIMENT-DERIVED FLUID CONTRIBUTION IN MANTLE WEDGE	EARTH PLANET SCI LETT	SANO, T; HASENAKA, T; SHIMAOKA, A; YONEZAWA, C; FUKUOKA, T	KH94-3	40.4648	144.489	-1				RNAA	SEDIMENTARY	UNKNOWN	UNKNOWN	SILICICLASTIC																							3.13		4.08
HAK9403-LM9/680		SEDDB	10.1016/S0012-821X(01)00244-8	BORON CONTENTS OF JAPAN TRENCH SEDIMENTS AND IWATE BASALTIC LAVAS, NORTHEAST JAPAN ARC: ESTIMATION OF SEDIMENT-DERIVED FLUID CONTRIBUTION IN MANTLE WEDGE	EARTH PLANET SCI LETT	SANO, T; HASENAKA, T; SHIMAOKA, A; YONEZAWA, C; FUKUOKA, T	KH94-3	40.4648	144.489	-1				XRF	SEDIMENTARY	UNKNOWN	UNKNOWN	SILICICLASTIC												2.03
HAK9403-LM9/680		SEDDB	10.1016/S0012-821X(01)00244-8	BORON CONTENTS OF JAPAN TRENCH SEDIMENTS AND IWATE BASALTIC LAVAS, NORTHEAST JAPAN ARC: ESTIMATION OF SEDIMENT-DERIVED FLUID CONTRIBUTION IN MANTLE WEDGE	EARTH PLANET SCI LETT	SANO, T; HASENAKA, T; SHIMAOKA, A; YONEZAWA, C; FUKUOKA, T	KH94-3	40.4648	144.489	-1				RNAA	SEDIMENTARY	UNKNOWN	UNKNOWN	SILICICLASTIC																							4.46		3.99
HAK9403-LM9/800		SEDDB	10.1016/S0012-821X(01)00244-8	BORON CONTENTS OF JAPAN TRENCH SEDIMENTS AND IWATE BASALTIC LAVAS, NORTHEAST JAPAN ARC: ESTIMATION OF SEDIMENT-DERIVED FLUID CONTRIBUTION IN MANTLE WEDGE	EARTH PLANET SCI LETT	SANO, T; HASENAKA, T; SHIMAOKA, A; YONEZAWA, C; FUKUOKA, T	KH94-3	40.4648	144.489	-1				XRF	SEDIMENTARY	UNKNOWN	UNKNOWN	SILICICLASTIC												2.14
HAK9403-LM9/800		SEDDB	10.1016/S0012-821X(01)00244-8	BORON CONTENTS OF JAPAN TRENCH SEDIMENTS AND IWATE BASALTIC LAVAS, NORTHEAST JAPAN ARC: ESTIMATION OF SEDIMENT-DERIVED FLUID CONTRIBUTION IN MANTLE WEDGE	EARTH PLANET SCI LETT	SANO, T; HASENAKA, T; SHIMAOKA, A; YONEZAWA, C; FUKUOKA, T	KH94-3	40.4648	144.489	-1				RNAA	SEDIMENTARY	UNKNOWN	UNKNOWN	SILICICLASTIC																							4.26		3.47
HAK9403-LM9/0		SEDDB	10.1016/S0012-821X(01)00244-8	BORON CONTENTS OF JAPAN TRENCH SEDIMENTS AND IWATE BASALTIC LAVAS, NORTHEAST JAPAN ARC: ESTIMATION OF SEDIMENT-DERIVED FLUID CONTRIBUTION IN MANTLE WEDGE	EARTH PLANET SCI LETT	SANO, T; HASENAKA, T; SHIMAOKA, A; YONEZAWA, C; FUKUOKA, T	KH94-3	40.4648	144.489	-1				XRF	SEDIMENTARY	UNKNOWN	UNKNOWN	SILICICLASTIC												1.76
HAK9403-LM9/0		SEDDB	10.1016/S0012-821X(01)00244-8	BORON CONTENTS OF JAPAN TRENCH SEDIMENTS AND IWATE BASALTIC LAVAS, NORTHEAST JAPAN ARC: ESTIMATION OF SEDIMENT-DERIVED FLUID CONTRIBUTION IN MANTLE WEDGE	EARTH PLANET SCI LETT	SANO, T; HASENAKA, T; SHIMAOKA, A; YONEZAWA, C; FUKUOKA, T	KH94-3	40.4648	144.489	-1				RNAA	SEDIMENTARY	UNKNOWN	UNKNOWN	SILICICLASTIC																							3.07		2.35
HAK9403-LM9/460		SEDDB	10.1016/S0012-821X(01)00244-8	BORON CONTENTS OF JAPAN TRENCH SEDIMENTS AND IWATE BASALTIC LAVAS, NORTHEAST JAPAN ARC: ESTIMATION OF SEDIMENT-DERIVED FLUID CONTRIBUTION IN MANTLE WEDGE	EARTH PLANET SCI LETT	SANO, T; HASENAKA, T; SHIMAOKA, A; YONEZAWA, C; FUKUOKA, T	KH94-3	40.4648	144.489	-1				XRF	SEDIMENTARY	UNKNOWN	UNKNOWN	SILICICLASTIC												1.93
HAK9403-LM9/460		SEDDB	10.1016/S0012-821X(01)00244-8	BORON CONTENTS OF JAPAN TRENCH SEDIMENTS AND IWATE BASALTIC LAVAS, NORTHEAST JAPAN ARC: ESTIMATION OF SEDIMENT-DERIVED FLUID CONTRIBUTION IN MANTLE WEDGE	EARTH PLANET SCI LETT	SANO, T; HASENAKA, T; SHIMAOKA, A; YONEZAWA, C; FUKUOKA, T	KH94-3	40.4648	144.489	-1				RNAA	SEDIMENTARY	UNKNOWN	UNKNOWN	SILICICLASTIC																							4.34		4.23
HAK9403-LM9/840		SEDDB	10.1016/S0012-821X(01)00244-8	BORON CONTENTS OF JAPAN TRENCH SEDIMENTS AND IWATE BASALTIC LAVAS, NORTHEAST JAPAN ARC: ESTIMATION OF SEDIMENT-DERIVED FLUID CONTRIBUTION IN MANTLE WEDGE	EARTH PLANET SCI LETT	SANO, T; HASENAKA, T; SHIMAOKA, A; YONEZAWA, C; FUKUOKA, T	KH94-3	40.4648	144.489	-1				XRF	SEDIMENTARY	UNKNOWN	UNKNOWN	SILICICLASTIC												2.05
HAK9403-LM9/840		SEDDB	10.1016/S0012-821X(01)00244-8	BORON CONTENTS OF JAPAN TRENCH SEDIMENTS AND IWATE BASALTIC LAVAS, NORTHEAST JAPAN ARC: ESTIMATION OF SEDIMENT-DERIVED FLUID CONTRIBUTION IN MANTLE WEDGE	EARTH PLANET SCI LETT	SANO, T; HASENAKA, T; SHIMAOKA, A; YONEZAWA, C; FUKUOKA, T	KH94-3	40.4648	144.489	-1				RNAA	SEDIMENTARY	UNKNOWN	UNKNOWN	SILICICLASTIC																							3.46		3.31
HAK9403-LM9/820		SEDDB	10.1016/S0012-821X(01)00244-8	BORON CONTENTS OF JAPAN TRENCH SEDIMENTS AND IWATE BASALTIC LAVAS, NORTHEAST JAPAN ARC: ESTIMATION OF SEDIMENT-DERIVED FLUID CONTRIBUTION IN MANTLE WEDGE	EARTH PLANET SCI LETT	SANO, T; HASENAKA, T; SHIMAOKA, A; YONEZAWA, C; FUKUOKA, T	KH94-3	40.4648	144.489	-1				XRF	SEDIMENTARY	UNKNOWN	UNKNOWN	SILICICLASTIC												2.12
HAK9403-LM9/820		SEDDB	10.1016/S0012-821X(01)00244-8	BORON CONTENTS OF JAPAN TRENCH SEDIMENTS AND IWATE BASALTIC LAVAS, NORTHEAST JAPAN ARC: ESTIMATION OF SEDIMENT-DERIVED FLUID CONTRIBUTION IN MANTLE WEDGE	EARTH PLANET SCI LETT	SANO, T; HASENAKA, T; SHIMAOKA, A; YONEZAWA, C; FUKUOKA, T	KH94-3	40.4648	144.489	-1				RNAA	SEDIMENTARY	UNKNOWN	UNKNOWN	SILICICLASTIC																							4.06		3.97
HAK9403-LM9/420		SEDDB	10.1016/S0012-821X(01)00244-8	BORON CONTENTS OF JAPAN TRENCH SEDIMENTS AND IWATE BASALTIC LAVAS, NORTHEAST JAPAN ARC: ESTIMATION OF SEDIMENT-DERIVED FLUID CONTRIBUTION IN MANTLE WEDGE	EARTH PLANET SCI LETT	SANO, T; HASENAKA, T; SHIMAOKA, A; YONEZAWA, C; FUKUOKA, T	KH94-3	40.4648	144.489	-1				XRF	SEDIMENTARY	UNKNOWN	UNKNOWN	SILICICLASTIC												1.94
HAK9403-LM9/420		SEDDB	10.1016/S0012-821X(01)00244-8	BORON CONTENTS OF JAPAN TRENCH SEDIMENTS AND IWATE BASALTIC LAVAS, NORTHEAST JAPAN ARC: ESTIMATION OF SEDIMENT-DERIVED FLUID CONTRIBUTION IN MANTLE WEDGE	EARTH PLANET SCI LETT	SANO, T; HASENAKA, T; SHIMAOKA, A; YONEZAWA, C; FUKUOKA, T	KH94-3	40.4648	144.489	-1				RNAA	SEDIMENTARY	UNKNOWN	UNKNOWN	SILICICLASTIC																							2.28		3.87
HAK9403-LM9/200		SEDDB	10.1016/S0012-821X(01)00244-8	BORON CONTENTS OF JAPAN TRENCH SEDIMENTS AND IWATE BASALTIC LAVAS, NORTHEAST JAPAN ARC: ESTIMATION OF SEDIMENT-DERIVED FLUID CONTRIBUTION IN MANTLE WEDGE	EARTH PLANET SCI LETT	SANO, T; HASENAKA, T; SHIMAOKA, A; YONEZAWA, C; FUKUOKA, T	KH94-3	40.4648	144.489	-1				XRF	SEDIMENTARY	UNKNOWN	UNKNOWN	SILICICLASTIC												1.94
HAK9403-LM9/200		SEDDB	10.1016/S0012-821X(01)00244-8	BORON CONTENTS OF JAPAN TRENCH SEDIMENTS AND IWATE BASALTIC LAVAS, NORTHEAST JAPAN ARC: ESTIMATION OF SEDIMENT-DERIVED FLUID CONTRIBUTION IN MANTLE WEDGE	EARTH PLANET SCI LETT	SANO, T; HASENAKA, T; SHIMAOKA, A; YONEZAWA, C; FUKUOKA, T	KH94-3	40.4648	144.489	-1				RNAA	SEDIMENTARY	UNKNOWN	UNKNOWN	SILICICLASTIC																							3.12		2.86
HAK9403-LM9/240		SEDDB	10.1016/S0012-821X(01)00244-8	BORON CONTENTS OF JAPAN TRENCH SEDIMENTS AND IWATE BASALTIC LAVAS, NORTHEAST JAPAN ARC: ESTIMATION OF SEDIMENT-DERIVED FLUID CONTRIBUTION IN MANTLE WEDGE	EARTH PLANET SCI LETT	SANO, T; HASENAKA, T; SHIMAOKA, A; YONEZAWA, C; FUKUOKA, T	KH94-3	40.4648	144.489	-1				XRF	SEDIMENTARY	UNKNOWN	UNKNOWN	SILICICLASTIC												1.99
HAK9403-LM9/240		SEDDB	10.1016/S0012-821X(01)00244-8	BORON CONTENTS OF JAPAN TRENCH SEDIMENTS AND IWATE BASALTIC LAVAS, NORTHEAST JAPAN ARC: ESTIMATION OF SEDIMENT-DERIVED FLUID CONTRIBUTION IN MANTLE WEDGE	EARTH PLANET SCI LETT	SANO, T; HASENAKA, T; SHIMAOKA, A; YONEZAWA, C; FUKUOKA, T	KH94-3	40.4648	144.489	-1				RNAA	SEDIMENTARY	UNKNOWN	UNKNOWN	SILICICLASTIC																							2.63		3.1
HAK9403-LM9/620		SEDDB	10.1016/S0012-821X(01)00244-8	BORON CONTENTS OF JAPAN TRENCH SEDIMENTS AND IWATE BASALTIC LAVAS, NORTHEAST JAPAN ARC: ESTIMATION OF SEDIMENT-DERIVED FLUID CONTRIBUTION IN MANTLE WEDGE	EARTH PLANET SCI LETT	SANO, T; HASENAKA, T; SHIMAOKA, A; YONEZAWA, C; FUKUOKA, T	KH94-3	40.4648	144.489	-1				XRF	SEDIMENTARY	UNKNOWN	UNKNOWN	SILICICLASTIC												2.02
HAK9403-LM9/620		SEDDB	10.1016/S0012-821X(01)00244-8	BORON CONTENTS OF JAPAN TRENCH SEDIMENTS AND IWATE BASALTIC LAVAS, NORTHEAST JAPAN ARC: ESTIMATION OF SEDIMENT-DERIVED FLUID CONTRIBUTION IN MANTLE WEDGE	EARTH PLANET SCI LETT	SANO, T; HASENAKA, T; SHIMAOKA, A; YONEZAWA, C; FUKUOKA, T	KH94-3	40.4648	144.489	-1				RNAA	SEDIMENTARY	UNKNOWN	UNKNOWN	SILICICLASTIC																							3.29		3.53
HAK9403-LM9/640		SEDDB	10.1016/S0012-821X(01)00244-8	BORON CONTENTS OF JAPAN TRENCH SEDIMENTS AND IWATE BASALTIC LAVAS, NORTHEAST JAPAN ARC: ESTIMATION OF SEDIMENT-DERIVED FLUID CONTRIBUTION IN MANTLE WEDGE	EARTH PLANET SCI LETT	SANO, T; HASENAKA, T; SHIMAOKA, A; YONEZAWA, C; FUKUOKA, T	KH94-3	40.4648	144.489	-1				XRF	SEDIMENTARY	UNKNOWN	UNKNOWN	SILICICLASTIC												1.91
HAK9403-LM9/640		SEDDB	10.1016/S0012-821X(01)00244-8	BORON CONTENTS OF JAPAN TRENCH SEDIMENTS AND IWATE BASALTIC LAVAS, NORTHEAST JAPAN ARC: ESTIMATION OF SEDIMENT-DERIVED FLUID CONTRIBUTION IN MANTLE WEDGE	EARTH PLANET SCI LETT	SANO, T; HASENAKA, T; SHIMAOKA, A; YONEZAWA, C; FUKUOKA, T	KH94-3	40.4648	144.489	-1				RNAA	SEDIMENTARY	UNKNOWN	UNKNOWN	SILICICLASTIC																							3.25		3.02
HAK9403-LM9/880		SEDDB	10.1016/S0012-821X(01)00244-8	BORON CONTENTS OF JAPAN TRENCH SEDIMENTS AND IWATE BASALTIC LAVAS, NORTHEAST JAPAN ARC: ESTIMATION OF SEDIMENT-DERIVED FLUID CONTRIBUTION IN MANTLE WEDGE	EARTH PLANET SCI LETT	SANO, T; HASENAKA, T; SHIMAOKA, A; YONEZAWA, C; FUKUOKA, T	KH94-3	40.4648	144.489	-1				XRF	SEDIMENTARY	UNKNOWN	UNKNOWN	SILICICLASTIC												2.09
HAK9403-LM9/880		SEDDB	10.1016/S0012-821X(01)00244-8	BORON CONTENTS OF JAPAN TRENCH SEDIMENTS AND IWATE BASALTIC LAVAS, NORTHEAST JAPAN ARC: ESTIMATION OF SEDIMENT-DERIVED FLUID CONTRIBUTION IN MANTLE WEDGE	EARTH PLANET SCI LETT	SANO, T; HASENAKA, T; SHIMAOKA, A; YONEZAWA, C; FUKUOKA, T	KH94-3	40.4648	144.489	-1				RNAA	SEDIMENTARY	UNKNOWN	UNKNOWN	SILICICLASTIC																							3.73		3.8
HAK9403-LM9/740		SEDDB	10.1016/S0012-821X(01)00244-8	BORON CONTENTS OF JAPAN TRENCH SEDIMENTS AND IWATE BASALTIC LAVAS, NORTHEAST JAPAN ARC: ESTIMATION OF SEDIMENT-DERIVED FLUID CONTRIBUTION IN MANTLE WEDGE	EARTH PLANET SCI LETT	SANO, T; HASENAKA, T; SHIMAOKA, A; YONEZAWA, C; FUKUOKA, T	KH94-3	40.4648	144.489	-1				XRF	SEDIMENTARY	UNKNOWN	UNKNOWN	SILICICLASTIC												2.09
HAK9403-LM9/740		SEDDB	10.1016/S0012-821X(01)00244-8	BORON CONTENTS OF JAPAN TRENCH SEDIMENTS AND IWATE BASALTIC LAVAS, NORTHEAST JAPAN ARC: ESTIMATION OF SEDIMENT-DERIVED FLUID CONTRIBUTION IN MANTLE WEDGE	EARTH PLANET SCI LETT	SANO, T; HASENAKA, T; SHIMAOKA, A; YONEZAWA, C; FUKUOKA, T	KH94-3	40.4648	144.489	-1				RNAA	SEDIMENTARY	UNKNOWN	UNKNOWN	SILICICLASTIC																							3.38		2.88
WEC8803B-009/0-1		SEDDB	10.1016/0016-7037(96)00236-0	SCAVENGED EXCESS ALUMINUM AND ITS RELATIONSHIP TO BULK TITANIUM IN BIOGENIC SEDIMENT FROM THE CENTRAL EQUATORIAL PACIFIC OCEAN	GEOCHIM COSMOCHIM ACTA	MURRAY, R; LEINEN, M	W88-03	-14.92	-133.93	-1	0		1.806	ICPMS	SEDIMENTARY	UNKNOWN	UNKNOWN	SILICICLASTIC																		115		55.5	37.7	204	44.8	11.8	62	8.48	64.3	12	37.4	5	33.1
WEC8803B-009/0-1		SEDDB	10.1016/0016-7037(96)00236-0	SCAVENGED EXCESS ALUMINUM AND ITS RELATIONSHIP TO BULK TITANIUM IN BIOGENIC SEDIMENT FROM THE CENTRAL EQUATORIAL PACIFIC OCEAN	GEOCHIM COSMOCHIM ACTA	MURRAY, R; LEINEN, M	W88-03	-14.92	-133.93	-1	0		1.806	XRF	SEDIMENTARY	UNKNOWN	UNKNOWN	SILICICLASTIC	27.1	0.526	8.53	10.1				1.98	12		4.83	2.36	2.18	3.04
WEC8803B-009/0-1		SEDDB	10.1016/0016-7037(96)00236-0	SCAVENGED EXCESS ALUMINUM AND ITS RELATIONSHIP TO BULK TITANIUM IN BIOGENIC SEDIMENT FROM THE CENTRAL EQUATORIAL PACIFIC OCEAN	GEOCHIM COSMOCHIM ACTA	MURRAY, R; LEINEN, M	W88-03	-14.92	-133.93	-1	0		1.806	ICPES	SEDIMENTARY	UNKNOWN	UNKNOWN	SILICICLASTIC
WEC8803B-009/0-1		SEDDB	10.1016/0016-7037(96)00236-0	SCAVENGED EXCESS ALUMINUM AND ITS RELATIONSHIP TO BULK TITANIUM IN BIOGENIC SEDIMENT FROM THE CENTRAL EQUATORIAL PACIFIC OCEAN	GEOCHIM COSMOCHIM ACTA	MURRAY, R; LEINEN, M	W88-03	-14.92	-133.93	-1	0		1.806	IGN	SEDIMENTARY	UNKNOWN	UNKNOWN	SILICICLASTIC															27.4
WEC8803B-009/0-1		SEDDB	10.1016/0016-7037(96)00236-0	SCAVENGED EXCESS ALUMINUM AND ITS RELATIONSHIP TO BULK TITANIUM IN BIOGENIC SEDIMENT FROM THE CENTRAL EQUATORIAL PACIFIC OCEAN	GEOCHIM COSMOCHIM ACTA	MURRAY, R; LEINEN, M	W88-03	-14.92	-133.93	-1	0		1.806	CALC	SEDIMENTARY	UNKNOWN	UNKNOWN	SILICICLASTIC
WEC8803B-009/0-1		SEDDB	10.1016/0016-7037(96)00236-0	SCAVENGED EXCESS ALUMINUM AND ITS RELATIONSHIP TO BULK TITANIUM IN BIOGENIC SEDIMENT FROM THE CENTRAL EQUATORIAL PACIFIC OCEAN	GEOCHIM COSMOCHIM ACTA	MURRAY, R; LEINEN, M	W88-03	-14.92	-133.93	-1	0		1.806	COUL	SEDIMENTARY	UNKNOWN	UNKNOWN	SILICICLASTIC																			15.08
WEC8803B-009/0-1		SEDDB	10.1016/0016-7037(96)00236-0	SCAVENGED EXCESS ALUMINUM AND ITS RELATIONSHIP TO BULK TITANIUM IN BIOGENIC SEDIMENT FROM THE CENTRAL EQUATORIAL PACIFIC OCEAN	GEOCHIM COSMOCHIM ACTA	MURRAY, R; LEINEN, M	W88-03	-14.92	-133.93	-1	0		1.806	COUL	SEDIMENTARY	UNKNOWN	UNKNOWN	SILICICLASTIC																			15.08
WEC8803B-009/0-1		SEDDB	10.1016/0016-7037(93)90312-K	CHEMICAL TRANSPORT TO THE SEAFLOOR OF THE EQUATORIAL PACIFIC OCEAN ACROSS A LATITUDINAL TRANSECT AT 135W: TRACKING SEDIMENTARY MAJOR, TRACE, AND RARE EARTH ELEMENT FLUXES AT THE EQUATOR AND THE INTERTROPICAL CONVERGENCE ZONE	GEOCHIM COSMOCHIM ACTA	MURRAY, R; LEINEN, M	W88-03	-14.92	-133.93	-1	0		1.806	ICPMS	SEDIMENTARY	UNKNOWN	UNKNOWN	SILICICLASTIC																		115		55.5	37.7	204	44.8	11.8	62	8.48	64.3	12	37.4	5	33.1
WEC8803B-009/0-1		SEDDB	10.1016/0016-7037(93)90312-K	CHEMICAL TRANSPORT TO THE SEAFLOOR OF THE EQUATORIAL PACIFIC OCEAN ACROSS A LATITUDINAL TRANSECT AT 135W: TRACKING SEDIMENTARY MAJOR, TRACE, AND RARE EARTH ELEMENT FLUXES AT THE EQUATOR AND THE INTERTROPICAL CONVERGENCE ZONE	GEOCHIM COSMOCHIM ACTA	MURRAY, R; LEINEN, M	W88-03	-14.92	-133.93	-1	0		1.806	XRF	SEDIMENTARY	UNKNOWN	UNKNOWN	SILICICLASTIC	27.1	0.526	8.53	10.1				1.98	12		4.83	2.36	2.18	3.04
WEC8803B-009/0-1		SEDDB	10.1016/0016-7037(93)90312-K	CHEMICAL TRANSPORT TO THE SEAFLOOR OF THE EQUATORIAL PACIFIC OCEAN ACROSS A LATITUDINAL TRANSECT AT 135W: TRACKING SEDIMENTARY MAJOR, TRACE, AND RARE EARTH ELEMENT FLUXES AT THE EQUATOR AND THE INTERTROPICAL CONVERGENCE ZONE	GEOCHIM COSMOCHIM ACTA	MURRAY, R; LEINEN, M	W88-03	-14.92	-133.93	-1	0		1.806	ICPES	SEDIMENTARY	UNKNOWN	UNKNOWN	SILICICLASTIC
WEC8803B-009/0-1		SEDDB	10.1016/0016-7037(93)90312-K	CHEMICAL TRANSPORT TO THE SEAFLOOR OF THE EQUATORIAL PACIFIC OCEAN ACROSS A LATITUDINAL TRANSECT AT 135W: TRACKING SEDIMENTARY MAJOR, TRACE, AND RARE EARTH ELEMENT FLUXES AT THE EQUATOR AND THE INTERTROPICAL CONVERGENCE ZONE	GEOCHIM COSMOCHIM ACTA	MURRAY, R; LEINEN, M	W88-03	-14.92	-133.93	-1	0		1.806	IGN	SEDIMENTARY	UNKNOWN	UNKNOWN	SILICICLASTIC															27.4
WEC8803B-009/0-1		SEDDB	10.1016/0016-7037(93)90312-K	CHEMICAL TRANSPORT TO THE SEAFLOOR OF THE EQUATORIAL PACIFIC OCEAN ACROSS A LATITUDINAL TRANSECT AT 135W: TRACKING SEDIMENTARY MAJOR, TRACE, AND RARE EARTH ELEMENT FLUXES AT THE EQUATOR AND THE INTERTROPICAL CONVERGENCE ZONE	GEOCHIM COSMOCHIM ACTA	MURRAY, R; LEINEN, M	W88-03	-14.92	-133.93	-1	0		1.806	CALC	SEDIMENTARY	UNKNOWN	UNKNOWN	SILICICLASTIC
WEC8803B-009/0-1		SEDDB	10.1016/0016-7037(93)90312-K	CHEMICAL TRANSPORT TO THE SEAFLOOR OF THE EQUATORIAL PACIFIC OCEAN ACROSS A LATITUDINAL TRANSECT AT 135W: TRACKING SEDIMENTARY MAJOR, TRACE, AND RARE EARTH ELEMENT FLUXES AT THE EQUATOR AND THE INTERTROPICAL CONVERGENCE ZONE	GEOCHIM COSMOCHIM ACTA	MURRAY, R; LEINEN, M	W88-03	-14.92	-133.93	-1	0		1.806	COUL	SEDIMENTARY	UNKNOWN	UNKNOWN	SILICICLASTIC																			15.08
WEC8803B-009/0-1		SEDDB	10.1016/0016-7037(93)90312-K	CHEMICAL TRANSPORT TO THE SEAFLOOR OF THE EQUATORIAL PACIFIC OCEAN ACROSS A LATITUDINAL TRANSECT AT 135W: TRACKING SEDIMENTARY MAJOR, TRACE, AND RARE EARTH ELEMENT FLUXES AT THE EQUATOR AND THE INTERTROPICAL CONVERGENCE ZONE	GEOCHIM COSMOCHIM ACTA	MURRAY, R; LEINEN, M	W88-03	-14.92	-133.93	-1	0		1.806	COUL	SEDIMENTARY	UNKNOWN	UNKNOWN	SILICICLASTIC																			15.08
WEC8803B-089/0-1		SEDDB	10.1016/0016-7037(96)00236-0	SCAVENGED EXCESS ALUMINUM AND ITS RELATIONSHIP TO BULK TITANIUM IN BIOGENIC SEDIMENT FROM THE CENTRAL EQUATORIAL PACIFIC OCEAN	GEOCHIM COSMOCHIM ACTA	MURRAY, R; LEINEN, M	W88-03	10	-136.52	-1	0		1.806	ICPMS	SEDIMENTARY	UNKNOWN	UNKNOWN	SILICICLASTIC																		30		46.2	10.3	40.2	9.18	2.43	10.1	1.4	9.62	1.55	4.69	0.63	4.24
WEC8803B-089/0-1		SEDDB	10.1016/0016-7037(96)00236-0	SCAVENGED EXCESS ALUMINUM AND ITS RELATIONSHIP TO BULK TITANIUM IN BIOGENIC SEDIMENT FROM THE CENTRAL EQUATORIAL PACIFIC OCEAN	GEOCHIM COSMOCHIM ACTA	MURRAY, R; LEINEN, M	W88-03	10	-136.52	-1	0		1.806	XRF	SEDIMENTARY	UNKNOWN	UNKNOWN	SILICICLASTIC	53.9	0.629	12.9	5.79				3.16	1.1		5.43	2.87	0.24	0.32
WEC8803B-089/0-1		SEDDB	10.1016/0016-7037(96)00236-0	SCAVENGED EXCESS ALUMINUM AND ITS RELATIONSHIP TO BULK TITANIUM IN BIOGENIC SEDIMENT FROM THE CENTRAL EQUATORIAL PACIFIC OCEAN	GEOCHIM COSMOCHIM ACTA	MURRAY, R; LEINEN, M	W88-03	10	-136.52	-1	0		1.806	ICPES	SEDIMENTARY	UNKNOWN	UNKNOWN	SILICICLASTIC
WEC8803B-089/0-1		SEDDB	10.1016/0016-7037(96)00236-0	SCAVENGED EXCESS ALUMINUM AND ITS RELATIONSHIP TO BULK TITANIUM IN BIOGENIC SEDIMENT FROM THE CENTRAL EQUATORIAL PACIFIC OCEAN	GEOCHIM COSMOCHIM ACTA	MURRAY, R; LEINEN, M	W88-03	10	-136.52	-1	0		1.806	IGN	SEDIMENTARY	UNKNOWN	UNKNOWN	SILICICLASTIC															13.5
WEC8803B-089/0-1		SEDDB	10.1016/0016-7037(96)00236-0	SCAVENGED EXCESS ALUMINUM AND ITS RELATIONSHIP TO BULK TITANIUM IN BIOGENIC SEDIMENT FROM THE CENTRAL EQUATORIAL PACIFIC OCEAN	GEOCHIM COSMOCHIM ACTA	MURRAY, R; LEINEN, M	W88-03	10	-136.52	-1	0		1.806	CALC	SEDIMENTARY	UNKNOWN	UNKNOWN	SILICICLASTIC
WEC8803B-089/0-1		SEDDB	10.1016/0016-7037(96)00236-0	SCAVENGED EXCESS ALUMINUM AND ITS RELATIONSHIP TO BULK TITANIUM IN BIOGENIC SEDIMENT FROM THE CENTRAL EQUATORIAL PACIFIC OCEAN	GEOCHIM COSMOCHIM ACTA	MURRAY, R; LEINEN, M	W88-03	10	-136.52	-1	0		1.806	COUL	SEDIMENTARY	UNKNOWN	UNKNOWN	SILICICLASTIC																			1.1
WEC8803B-089/0-1		SEDDB	10.1016/0016-7037(96)00236-0	SCAVENGED EXCESS ALUMINUM AND ITS RELATIONSHIP TO BULK TITANIUM IN BIOGENIC SEDIMENT FROM THE CENTRAL EQUATORIAL PACIFIC OCEAN	GEOCHIM COSMOCHIM ACTA	MURRAY, R; LEINEN, M	W88-03	10	-136.52	-1	0		1.806	COUL	SEDIMENTARY	UNKNOWN	UNKNOWN	SILICICLASTIC																			1.1
WEC8803B-089/0-1		SEDDB	10.1016/0016-7037(93)90312-K	CHEMICAL TRANSPORT TO THE SEAFLOOR OF THE EQUATORIAL PACIFIC OCEAN ACROSS A LATITUDINAL TRANSECT AT 135W: TRACKING SEDIMENTARY MAJOR, TRACE, AND RARE EARTH ELEMENT FLUXES AT THE EQUATOR AND THE INTERTROPICAL CONVERGENCE ZONE	GEOCHIM COSMOCHIM ACTA	MURRAY, R; LEINEN, M	W88-03	10	-136.52	-1	0		1.806	ICPMS	SEDIMENTARY	UNKNOWN	UNKNOWN	SILICICLASTIC																		30		46.2	10.3	40.2	9.18	2.43	10.1	1.4	9.62	1.55	4.69	0.63	4.24
WEC8803B-089/0-1		SEDDB	10.1016/0016-7037(93)90312-K	CHEMICAL TRANSPORT TO THE SEAFLOOR OF THE EQUATORIAL PACIFIC OCEAN ACROSS A LATITUDINAL TRANSECT AT 135W: TRACKING SEDIMENTARY MAJOR, TRACE, AND RARE EARTH ELEMENT FLUXES AT THE EQUATOR AND THE INTERTROPICAL CONVERGENCE ZONE	GEOCHIM COSMOCHIM ACTA	MURRAY, R; LEINEN, M	W88-03	10	-136.52	-1	0		1.806	XRF	SEDIMENTARY	UNKNOWN	UNKNOWN	SILICICLASTIC	53.9	0.629	12.9	5.79				3.16	1.1		5.43	2.87	0.24	0.32
WEC8803B-089/0-1		SEDDB	10.1016/0016-7037(93)90312-K	CHEMICAL TRANSPORT TO THE SEAFLOOR OF THE EQUATORIAL PACIFIC OCEAN ACROSS A LATITUDINAL TRANSECT AT 135W: TRACKING SEDIMENTARY MAJOR, TRACE, AND RARE EARTH ELEMENT FLUXES AT THE EQUATOR AND THE INTERTROPICAL CONVERGENCE ZONE	GEOCHIM COSMOCHIM ACTA	MURRAY, R; LEINEN, M	W88-03	10	-136.52	-1	0		1.806	ICPES	SEDIMENTARY	UNKNOWN	UNKNOWN	SILICICLASTIC
WEC8803B-089/0-1		SEDDB	10.1016/0016-7037(93)90312-K	CHEMICAL TRANSPORT TO THE SEAFLOOR OF THE EQUATORIAL PACIFIC OCEAN ACROSS A LATITUDINAL TRANSECT AT 135W: TRACKING SEDIMENTARY MAJOR, TRACE, AND RARE EARTH ELEMENT FLUXES AT THE EQUATOR AND THE INTERTROPICAL CONVERGENCE ZONE	GEOCHIM COSMOCHIM ACTA	MURRAY, R; LEINEN, M	W88-03	10	-136.52	-1	0		1.806	IGN	SEDIMENTARY	UNKNOWN	UNKNOWN	SILICICLASTIC															13.5
WEC8803B-089/0-1		SEDDB	10.1016/0016-7037(93)90312-K	CHEMICAL TRANSPORT TO THE SEAFLOOR OF THE EQUATORIAL PACIFIC OCEAN ACROSS A LATITUDINAL TRANSECT AT 135W: TRACKING SEDIMENTARY MAJOR, TRACE, AND RARE EARTH ELEMENT FLUXES AT THE EQUATOR AND THE INTERTROPICAL CONVERGENCE ZONE	GEOCHIM COSMOCHIM ACTA	MURRAY, R; LEINEN, M	W88-03	10	-136.52	-1	0		1.806	CALC	SEDIMENTARY	UNKNOWN	UNKNOWN	SILICICLASTIC
WEC8803B-089/0-1		SEDDB	10.1016/0016-7037(93)90312-K	CHEMICAL TRANSPORT TO THE SEAFLOOR OF THE EQUATORIAL PACIFIC OCEAN ACROSS A LATITUDINAL TRANSECT AT 135W: TRACKING SEDIMENTARY MAJOR, TRACE, AND RARE EARTH ELEMENT FLUXES AT THE EQUATOR AND THE INTERTROPICAL CONVERGENCE ZONE	GEOCHIM COSMOCHIM ACTA	MURRAY, R; LEINEN, M	W88-03	10	-136.52	-1	0		1.806	COUL	SEDIMENTARY	UNKNOWN	UNKNOWN	SILICICLASTIC																			1.1
WEC8803B-089/0-1		SEDDB	10.1016/0016-7037(93)90312-K	CHEMICAL TRANSPORT TO THE SEAFLOOR OF THE EQUATORIAL PACIFIC OCEAN ACROSS A LATITUDINAL TRANSECT AT 135W: TRACKING SEDIMENTARY MAJOR, TRACE, AND RARE EARTH ELEMENT FLUXES AT THE EQUATOR AND THE INTERTROPICAL CONVERGENCE ZONE	GEOCHIM COSMOCHIM ACTA	MURRAY, R; LEINEN, M	W88-03	10	-136.52	-1	0		1.806	COUL	SEDIMENTARY	UNKNOWN	UNKNOWN	SILICICLASTIC																			1.1
WEC8803B-092/0-1		SEDDB	10.1016/0016-7037(96)00236-0	SCAVENGED EXCESS ALUMINUM AND ITS RELATIONSHIP TO BULK TITANIUM IN BIOGENIC SEDIMENT FROM THE CENTRAL EQUATORIAL PACIFIC OCEAN	GEOCHIM COSMOCHIM ACTA	MURRAY, R; LEINEN, M	W88-03	11.08	-136.4	-1	0		1.806	ICPMS	SEDIMENTARY	UNKNOWN	UNKNOWN	SILICICLASTIC																		27.5		45	9.34	35.6	8.23	2.17	9.02	1.25	8.3	1.34	4.07	0.55	3.86
WEC8803B-092/0-1		SEDDB	10.1016/0016-7037(96)00236-0	SCAVENGED EXCESS ALUMINUM AND ITS RELATIONSHIP TO BULK TITANIUM IN BIOGENIC SEDIMENT FROM THE CENTRAL EQUATORIAL PACIFIC OCEAN	GEOCHIM COSMOCHIM ACTA	MURRAY, R; LEINEN, M	W88-03	11.08	-136.4	-1	0		1.806	XRF	SEDIMENTARY	UNKNOWN	UNKNOWN	SILICICLASTIC	52.1	0.588	12.2	5.48				2.98	1.18			2.84	0.2	0.29
WEC8803B-092/0-1		SEDDB	10.1016/0016-7037(96)00236-0	SCAVENGED EXCESS ALUMINUM AND ITS RELATIONSHIP TO BULK TITANIUM IN BIOGENIC SEDIMENT FROM THE CENTRAL EQUATORIAL PACIFIC OCEAN	GEOCHIM COSMOCHIM ACTA	MURRAY, R; LEINEN, M	W88-03	11.08	-136.4	-1	0		1.806	ICPES	SEDIMENTARY	UNKNOWN	UNKNOWN	SILICICLASTIC
WEC8803B-092/0-1		SEDDB	10.1016/0016-7037(96)00236-0	SCAVENGED EXCESS ALUMINUM AND ITS RELATIONSHIP TO BULK TITANIUM IN BIOGENIC SEDIMENT FROM THE CENTRAL EQUATORIAL PACIFIC OCEAN	GEOCHIM COSMOCHIM ACTA	MURRAY, R; LEINEN, M	W88-03	11.08	-136.4	-1	0		1.806	IGN	SEDIMENTARY	UNKNOWN	UNKNOWN	SILICICLASTIC															16.2
WEC8803B-092/0-1		SEDDB	10.1016/0016-7037(96)00236-0	SCAVENGED EXCESS ALUMINUM AND ITS RELATIONSHIP TO BULK TITANIUM IN BIOGENIC SEDIMENT FROM THE CENTRAL EQUATORIAL PACIFIC OCEAN	GEOCHIM COSMOCHIM ACTA	MURRAY, R; LEINEN, M	W88-03	11.08	-136.4	-1	0		1.806	COUL	SEDIMENTARY	UNKNOWN	UNKNOWN	SILICICLASTIC																			0.5
WEC8803B-092/0-1		SEDDB	10.1016/0016-7037(96)00236-0	SCAVENGED EXCESS ALUMINUM AND ITS RELATIONSHIP TO BULK TITANIUM IN BIOGENIC SEDIMENT FROM THE CENTRAL EQUATORIAL PACIFIC OCEAN	GEOCHIM COSMOCHIM ACTA	MURRAY, R; LEINEN, M	W88-03	11.08	-136.4	-1	0		1.806	COUL	SEDIMENTARY	UNKNOWN	UNKNOWN	SILICICLASTIC																			0.5
WEC8803B-092/0-1		SEDDB	10.1016/0016-7037(93)90312-K	CHEMICAL TRANSPORT TO THE SEAFLOOR OF THE EQUATORIAL PACIFIC OCEAN ACROSS A LATITUDINAL TRANSECT AT 135W: TRACKING SEDIMENTARY MAJOR, TRACE, AND RARE EARTH ELEMENT FLUXES AT THE EQUATOR AND THE INTERTROPICAL CONVERGENCE ZONE	GEOCHIM COSMOCHIM ACTA	MURRAY, R; LEINEN, M	W88-03	11.08	-136.4	-1	0		1.806	ICPMS	SEDIMENTARY	UNKNOWN	UNKNOWN	SILICICLASTIC																		27.5		45	9.34	35.6	8.23	2.17	9.02	1.25	8.3	1.34	4.07	0.55	3.86
WEC8803B-092/0-1		SEDDB	10.1016/0016-7037(93)90312-K	CHEMICAL TRANSPORT TO THE SEAFLOOR OF THE EQUATORIAL PACIFIC OCEAN ACROSS A LATITUDINAL TRANSECT AT 135W: TRACKING SEDIMENTARY MAJOR, TRACE, AND RARE EARTH ELEMENT FLUXES AT THE EQUATOR AND THE INTERTROPICAL CONVERGENCE ZONE	GEOCHIM COSMOCHIM ACTA	MURRAY, R; LEINEN, M	W88-03	11.08	-136.4	-1	0		1.806	XRF	SEDIMENTARY	UNKNOWN	UNKNOWN	SILICICLASTIC	52.1	0.588	12.2	5.48				2.98	1.18			2.84	0.2	0.29
WEC8803B-092/0-1		SEDDB	10.1016/0016-7037(93)90312-K	CHEMICAL TRANSPORT TO THE SEAFLOOR OF THE EQUATORIAL PACIFIC OCEAN ACROSS A LATITUDINAL TRANSECT AT 135W: TRACKING SEDIMENTARY MAJOR, TRACE, AND RARE EARTH ELEMENT FLUXES AT THE EQUATOR AND THE INTERTROPICAL CONVERGENCE ZONE	GEOCHIM COSMOCHIM ACTA	MURRAY, R; LEINEN, M	W88-03	11.08	-136.4	-1	0		1.806	ICPES	SEDIMENTARY	UNKNOWN	UNKNOWN	SILICICLASTIC
WEC8803B-092/0-1		SEDDB	10.1016/0016-7037(93)90312-K	CHEMICAL TRANSPORT TO THE SEAFLOOR OF THE EQUATORIAL PACIFIC OCEAN ACROSS A LATITUDINAL TRANSECT AT 135W: TRACKING SEDIMENTARY MAJOR, TRACE, AND RARE EARTH ELEMENT FLUXES AT THE EQUATOR AND THE INTERTROPICAL CONVERGENCE ZONE	GEOCHIM COSMOCHIM ACTA	MURRAY, R; LEINEN, M	W88-03	11.08	-136.4	-1	0		1.806	IGN	SEDIMENTARY	UNKNOWN	UNKNOWN	SILICICLASTIC															16.2
WEC8803B-092/0-1		SEDDB	10.1016/0016-7037(93)90312-K	CHEMICAL TRANSPORT TO THE SEAFLOOR OF THE EQUATORIAL PACIFIC OCEAN ACROSS A LATITUDINAL TRANSECT AT 135W: TRACKING SEDIMENTARY MAJOR, TRACE, AND RARE EARTH ELEMENT FLUXES AT THE EQUATOR AND THE INTERTROPICAL CONVERGENCE ZONE	GEOCHIM COSMOCHIM ACTA	MURRAY, R; LEINEN, M	W88-03	11.08	-136.4	-1	0		1.806	COUL	SEDIMENTARY	UNKNOWN	UNKNOWN	SILICICLASTIC																			0.5
WEC8803B-092/0-1		SEDDB	10.1016/0016-7037(93)90312-K	CHEMICAL TRANSPORT TO THE SEAFLOOR OF THE EQUATORIAL PACIFIC OCEAN ACROSS A LATITUDINAL TRANSECT AT 135W: TRACKING SEDIMENTARY MAJOR, TRACE, AND RARE EARTH ELEMENT FLUXES AT THE EQUATOR AND THE INTERTROPICAL CONVERGENCE ZONE	GEOCHIM COSMOCHIM ACTA	MURRAY, R; LEINEN, M	W88-03	11.08	-136.4	-1	0		1.806	COUL	SEDIMENTARY	UNKNOWN	UNKNOWN	SILICICLASTIC																			0.5
WEC8803B-069/0-1		SEDDB	10.1016/0016-7037(96)00236-0	SCAVENGED EXCESS ALUMINUM AND ITS RELATIONSHIP TO BULK TITANIUM IN BIOGENIC SEDIMENT FROM THE CENTRAL EQUATORIAL PACIFIC OCEAN	GEOCHIM COSMOCHIM ACTA	MURRAY, R; LEINEN, M	W88-03	7.2	-137.55	-1	0		1.806	ICPMS	SEDIMENTARY	UNKNOWN	UNKNOWN	SILICICLASTIC																		29.5		43.6	9.58	37.8	8.19	2.3	9.53	1.33	8.94	1.46	4.25	0.58	4
WEC8803B-069/0-1		SEDDB	10.1016/0016-7037(96)00236-0	SCAVENGED EXCESS ALUMINUM AND ITS RELATIONSHIP TO BULK TITANIUM IN BIOGENIC SEDIMENT FROM THE CENTRAL EQUATORIAL PACIFIC OCEAN	GEOCHIM COSMOCHIM ACTA	MURRAY, R; LEINEN, M	W88-03	7.2	-137.55	-1	0		1.806	XRF	SEDIMENTARY	UNKNOWN	UNKNOWN	SILICICLASTIC	43.5	0.473	10.4	4.75				2.71	10.9		5.21	1.54	0.22	0.41
WEC8803B-069/0-1		SEDDB	10.1016/0016-7037(96)00236-0	SCAVENGED EXCESS ALUMINUM AND ITS RELATIONSHIP TO BULK TITANIUM IN BIOGENIC SEDIMENT FROM THE CENTRAL EQUATORIAL PACIFIC OCEAN	GEOCHIM COSMOCHIM ACTA	MURRAY, R; LEINEN, M	W88-03	7.2	-137.55	-1	0		1.806	ICPES	SEDIMENTARY	UNKNOWN	UNKNOWN	SILICICLASTIC
WEC8803B-069/0-1		SEDDB	10.1016/0016-7037(96)00236-0	SCAVENGED EXCESS ALUMINUM AND ITS RELATIONSHIP TO BULK TITANIUM IN BIOGENIC SEDIMENT FROM THE CENTRAL EQUATORIAL PACIFIC OCEAN	GEOCHIM COSMOCHIM ACTA	MURRAY, R; LEINEN, M	W88-03	7.2	-137.55	-1	0		1.806	IGN	SEDIMENTARY	UNKNOWN	UNKNOWN	SILICICLASTIC															21.2
WEC8803B-069/0-1		SEDDB	10.1016/0016-7037(96)00236-0	SCAVENGED EXCESS ALUMINUM AND ITS RELATIONSHIP TO BULK TITANIUM IN BIOGENIC SEDIMENT FROM THE CENTRAL EQUATORIAL PACIFIC OCEAN	GEOCHIM COSMOCHIM ACTA	MURRAY, R; LEINEN, M	W88-03	7.2	-137.55	-1	0		1.806	CALC	SEDIMENTARY	UNKNOWN	UNKNOWN	SILICICLASTIC
WEC8803B-069/0-1		SEDDB	10.1016/0016-7037(96)00236-0	SCAVENGED EXCESS ALUMINUM AND ITS RELATIONSHIP TO BULK TITANIUM IN BIOGENIC SEDIMENT FROM THE CENTRAL EQUATORIAL PACIFIC OCEAN	GEOCHIM COSMOCHIM ACTA	MURRAY, R; LEINEN, M	W88-03	7.2	-137.55	-1	0		1.806	COUL	SEDIMENTARY	UNKNOWN	UNKNOWN	SILICICLASTIC																			13
WEC8803B-069/0-1		SEDDB	10.1016/0016-7037(96)00236-0	SCAVENGED EXCESS ALUMINUM AND ITS RELATIONSHIP TO BULK TITANIUM IN BIOGENIC SEDIMENT FROM THE CENTRAL EQUATORIAL PACIFIC OCEAN	GEOCHIM COSMOCHIM ACTA	MURRAY, R; LEINEN, M	W88-03	7.2	-137.55	-1	0		1.806	COUL	SEDIMENTARY	UNKNOWN	UNKNOWN	SILICICLASTIC																			13
WEC8803B-069/0-1		SEDDB	10.1016/0016-7037(93)90312-K	CHEMICAL TRANSPORT TO THE SEAFLOOR OF THE EQUATORIAL PACIFIC OCEAN ACROSS A LATITUDINAL TRANSECT AT 135W: TRACKING SEDIMENTARY MAJOR, TRACE, AND RARE EARTH ELEMENT FLUXES AT THE EQUATOR AND THE INTERTROPICAL CONVERGENCE ZONE	GEOCHIM COSMOCHIM ACTA	MURRAY, R; LEINEN, M	W88-03	7.2	-137.55	-1	0		1.806	ICPMS	SEDIMENTARY	UNKNOWN	UNKNOWN	SILICICLASTIC																		29.5		43.6	9.58	37.8	8.19	2.3	9.53	1.33	8.94	1.46	4.25	0.58	4
WEC8803B-069/0-1		SEDDB	10.1016/0016-7037(93)90312-K	CHEMICAL TRANSPORT TO THE SEAFLOOR OF THE EQUATORIAL PACIFIC OCEAN ACROSS A LATITUDINAL TRANSECT AT 135W: TRACKING SEDIMENTARY MAJOR, TRACE, AND RARE EARTH ELEMENT FLUXES AT THE EQUATOR AND THE INTERTROPICAL CONVERGENCE ZONE	GEOCHIM COSMOCHIM ACTA	MURRAY, R; LEINEN, M	W88-03	7.2	-137.55	-1	0		1.806	XRF	SEDIMENTARY	UNKNOWN	UNKNOWN	SILICICLASTIC	43.5	0.473	10.4	4.75				2.71	10.9		5.21	1.54	0.22	0.41
WEC8803B-069/0-1		SEDDB	10.1016/0016-7037(93)90312-K	CHEMICAL TRANSPORT TO THE SEAFLOOR OF THE EQUATORIAL PACIFIC OCEAN ACROSS A LATITUDINAL TRANSECT AT 135W: TRACKING SEDIMENTARY MAJOR, TRACE, AND RARE EARTH ELEMENT FLUXES AT THE EQUATOR AND THE INTERTROPICAL CONVERGENCE ZONE	GEOCHIM COSMOCHIM ACTA	MURRAY, R; LEINEN, M	W88-03	7.2	-137.55	-1	0		1.806	ICPES	SEDIMENTARY	UNKNOWN	UNKNOWN	SILICICLASTIC
WEC8803B-069/0-1		SEDDB	10.1016/0016-7037(93)90312-K	CHEMICAL TRANSPORT TO THE SEAFLOOR OF THE EQUATORIAL PACIFIC OCEAN ACROSS A LATITUDINAL TRANSECT AT 135W: TRACKING SEDIMENTARY MAJOR, TRACE, AND RARE EARTH ELEMENT FLUXES AT THE EQUATOR AND THE INTERTROPICAL CONVERGENCE ZONE	GEOCHIM COSMOCHIM ACTA	MURRAY, R; LEINEN, M	W88-03	7.2	-137.55	-1	0		1.806	IGN	SEDIMENTARY	UNKNOWN	UNKNOWN	SILICICLASTIC															21.2
WEC8803B-069/0-1		SEDDB	10.1016/0016-7037(93)90312-K	CHEMICAL TRANSPORT TO THE SEAFLOOR OF THE EQUATORIAL PACIFIC OCEAN ACROSS A LATITUDINAL TRANSECT AT 135W: TRACKING SEDIMENTARY MAJOR, TRACE, AND RARE EARTH ELEMENT FLUXES AT THE EQUATOR AND THE INTERTROPICAL CONVERGENCE ZONE	GEOCHIM COSMOCHIM ACTA	MURRAY, R; LEINEN, M	W88-03	7.2	-137.55	-1	0		1.806	CALC	SEDIMENTARY	UNKNOWN	UNKNOWN	SILICICLASTIC
WEC8803B-069/0-1		SEDDB	10.1016/0016-7037(93)90312-K	CHEMICAL TRANSPORT TO THE SEAFLOOR OF THE EQUATORIAL PACIFIC OCEAN ACROSS A LATITUDINAL TRANSECT AT 135W: TRACKING SEDIMENTARY MAJOR, TRACE, AND RARE EARTH ELEMENT FLUXES AT THE EQUATOR AND THE INTERTROPICAL CONVERGENCE ZONE	GEOCHIM COSMOCHIM ACTA	MURRAY, R; LEINEN, M	W88-03	7.2	-137.55	-1	0		1.806	COUL	SEDIMENTARY	UNKNOWN	UNKNOWN	SILICICLASTIC																			13
WEC8803B-069/0-1		SEDDB	10.1016/0016-7037(93)90312-K	CHEMICAL TRANSPORT TO THE SEAFLOOR OF THE EQUATORIAL PACIFIC OCEAN ACROSS A LATITUDINAL TRANSECT AT 135W: TRACKING SEDIMENTARY MAJOR, TRACE, AND RARE EARTH ELEMENT FLUXES AT THE EQUATOR AND THE INTERTROPICAL CONVERGENCE ZONE	GEOCHIM COSMOCHIM ACTA	MURRAY, R; LEINEN, M	W88-03	7.2	-137.55	-1	0		1.806	COUL	SEDIMENTARY	UNKNOWN	UNKNOWN	SILICICLASTIC																			13
HAK8403-AN1/0-260		SEDDB	10.1016/0012-821X(93)90249-9	RAPID AND FREQUENT TURBIDITE ACCUMULATION IN THE BOTTOM OF IZU-OGASAWARA TRENCH: CHEMICAL AND RADIOCHEMICAL EVIDENCE	EARTH PLANET SCI LETT	NOZAKI, Y; OHTA, Y	KH84-3	29.09	142.85	-1				ICPAES	SEDIMENTARY	UNKNOWN	UNKNOWN	SILICICLASTIC
HAK8403-AN1/0-95		SEDDB	10.1016/0012-821X(93)90249-9	RAPID AND FREQUENT TURBIDITE ACCUMULATION IN THE BOTTOM OF IZU-OGASAWARA TRENCH: CHEMICAL AND RADIOCHEMICAL EVIDENCE	EARTH PLANET SCI LETT	NOZAKI, Y; OHTA, Y	KH84-3	29.09	142.85	-1				ICPAES	SEDIMENTARY	UNKNOWN	UNKNOWN	SILICICLASTIC
HAK8403-AN1/260-611		SEDDB	10.1016/0012-821X(93)90249-9	RAPID AND FREQUENT TURBIDITE ACCUMULATION IN THE BOTTOM OF IZU-OGASAWARA TRENCH: CHEMICAL AND RADIOCHEMICAL EVIDENCE	EARTH PLANET SCI LETT	NOZAKI, Y; OHTA, Y	KH84-3	29.09	142.85	-1				ICPAES	SEDIMENTARY	UNKNOWN	UNKNOWN	SILICICLASTIC
SON0147-122/0-5		SEDDB	10.1016/j.gca.2004.04.027	GEOCHEMISTRY OF PERUVIAN NEAR-SURFACE SEDIMENTS	GEOCHIM COSMOCHIM ACTA	BOENING, P; BRUMSACK, H-J; BOETTCHER, M; SCHNETGER, B; KRIETE, C; KALLMEYER, J; BORCHERS, S	SO147	-12.9317	-77.0217	-1				ICPMS	SEDIMENTARY	UNKNOWN	UNKNOWN	SILICICLASTIC
SON0147-122/0-5		SEDDB	10.1016/j.gca.2004.04.027	GEOCHEMISTRY OF PERUVIAN NEAR-SURFACE SEDIMENTS	GEOCHIM COSMOCHIM ACTA	BOENING, P; BRUMSACK, H-J; BOETTCHER, M; SCHNETGER, B; KRIETE, C; KALLMEYER, J; BORCHERS, S	SO147	-12.9317	-77.0217	-1				XRF	SEDIMENTARY	UNKNOWN	UNKNOWN	SILICICLASTIC
SON0147-081/0-5		SEDDB	10.1016/j.gca.2004.04.027	GEOCHEMISTRY OF PERUVIAN NEAR-SURFACE SEDIMENTS	GEOCHIM COSMOCHIM ACTA	BOENING, P; BRUMSACK, H-J; BOETTCHER, M; SCHNETGER, B; KRIETE, C; KALLMEYER, J; BORCHERS, S	SO147	-10.6678	-78.85	-1				ICPMS	SEDIMENTARY	UNKNOWN	UNKNOWN	SILICICLASTIC
SON0147-081/0-5		SEDDB	10.1016/j.gca.2004.04.027	GEOCHEMISTRY OF PERUVIAN NEAR-SURFACE SEDIMENTS	GEOCHIM COSMOCHIM ACTA	BOENING, P; BRUMSACK, H-J; BOETTCHER, M; SCHNETGER, B; KRIETE, C; KALLMEYER, J; BORCHERS, S	SO147	-10.6678	-78.85	-1				XRF	SEDIMENTARY	UNKNOWN	UNKNOWN	SILICICLASTIC
SON0147-033/0-5		SEDDB	10.1016/j.gca.2004.04.027	GEOCHEMISTRY OF PERUVIAN NEAR-SURFACE SEDIMENTS	GEOCHIM COSMOCHIM ACTA	BOENING, P; BRUMSACK, H-J; BOETTCHER, M; SCHNETGER, B; KRIETE, C; KALLMEYER, J; BORCHERS, S	SO147	-9.7489	-79.7333	-1				ICPMS	SEDIMENTARY	UNKNOWN	UNKNOWN	SILICICLASTIC
SON0147-033/0-5		SEDDB	10.1016/j.gca.2004.04.027	GEOCHEMISTRY OF PERUVIAN NEAR-SURFACE SEDIMENTS	GEOCHIM COSMOCHIM ACTA	BOENING, P; BRUMSACK, H-J; BOETTCHER, M; SCHNETGER, B; KRIETE, C; KALLMEYER, J; BORCHERS, S	SO147	-9.7489	-79.7333	-1				XRF	SEDIMENTARY	UNKNOWN	UNKNOWN	SILICICLASTIC
SON0147-005/0-5		SEDDB	10.1016/j.gca.2004.04.027	GEOCHEMISTRY OF PERUVIAN NEAR-SURFACE SEDIMENTS	GEOCHIM COSMOCHIM ACTA	BOENING, P; BRUMSACK, H-J; BOETTCHER, M; SCHNETGER, B; KRIETE, C; KALLMEYER, J; BORCHERS, S	SO147	-11.9597	-77.3211	-1				ICPMS	SEDIMENTARY	UNKNOWN	UNKNOWN	SILICICLASTIC
SON0147-005/0-5		SEDDB	10.1016/j.gca.2004.04.027	GEOCHEMISTRY OF PERUVIAN NEAR-SURFACE SEDIMENTS	GEOCHIM COSMOCHIM ACTA	BOENING, P; BRUMSACK, H-J; BOETTCHER, M; SCHNETGER, B; KRIETE, C; KALLMEYER, J; BORCHERS, S	SO147	-11.9597	-77.3211	-1				XRF	SEDIMENTARY	UNKNOWN	UNKNOWN	SILICICLASTIC
SON0147-035/0-5		SEDDB	10.1016/j.gca.2004.04.027	GEOCHEMISTRY OF PERUVIAN NEAR-SURFACE SEDIMENTS	GEOCHIM COSMOCHIM ACTA	BOENING, P; BRUMSACK, H-J; BOETTCHER, M; SCHNETGER, B; KRIETE, C; KALLMEYER, J; BORCHERS, S	SO147	-9.8542	-79.355	-1				ICPMS	SEDIMENTARY	UNKNOWN	UNKNOWN	SILICICLASTIC
SON0147-035/0-5		SEDDB	10.1016/j.gca.2004.04.027	GEOCHEMISTRY OF PERUVIAN NEAR-SURFACE SEDIMENTS	GEOCHIM COSMOCHIM ACTA	BOENING, P; BRUMSACK, H-J; BOETTCHER, M; SCHNETGER, B; KRIETE, C; KALLMEYER, J; BORCHERS, S	SO147	-9.8542	-79.355	-1				XRF	SEDIMENTARY	UNKNOWN	UNKNOWN	SILICICLASTIC
SON0147-014/0-5		SEDDB	10.1016/j.gca.2004.04.027	GEOCHEMISTRY OF PERUVIAN NEAR-SURFACE SEDIMENTS	GEOCHIM COSMOCHIM ACTA	BOENING, P; BRUMSACK, H-J; BOETTCHER, M; SCHNETGER, B; KRIETE, C; KALLMEYER, J; BORCHERS, S	SO147	-11.1333	-78.3719	-1				ICPMS	SEDIMENTARY	UNKNOWN	UNKNOWN	SILICICLASTIC
SON0147-014/0-5		SEDDB	10.1016/j.gca.2004.04.027	GEOCHEMISTRY OF PERUVIAN NEAR-SURFACE SEDIMENTS	GEOCHIM COSMOCHIM ACTA	BOENING, P; BRUMSACK, H-J; BOETTCHER, M; SCHNETGER, B; KRIETE, C; KALLMEYER, J; BORCHERS, S	SO147	-11.1333	-78.3719	-1				XRF	SEDIMENTARY	UNKNOWN	UNKNOWN	SILICICLASTIC
SON0147-126/0-5		SEDDB	10.1016/j.gca.2004.04.027	GEOCHEMISTRY OF PERUVIAN NEAR-SURFACE SEDIMENTS	GEOCHIM COSMOCHIM ACTA	BOENING, P; BRUMSACK, H-J; BOETTCHER, M; SCHNETGER, B; KRIETE, C; KALLMEYER, J; BORCHERS, S	SO147	-13.5239	-76.2881	-1				ICPMS	SEDIMENTARY	UNKNOWN	UNKNOWN	SILICICLASTIC
SON0147-126/0-5		SEDDB	10.1016/j.gca.2004.04.027	GEOCHEMISTRY OF PERUVIAN NEAR-SURFACE SEDIMENTS	GEOCHIM COSMOCHIM ACTA	BOENING, P; BRUMSACK, H-J; BOETTCHER, M; SCHNETGER, B; KRIETE, C; KALLMEYER, J; BORCHERS, S	SO147	-13.5239	-76.2881	-1				XRF	SEDIMENTARY	UNKNOWN	UNKNOWN	SILICICLASTIC
SON0147-071/0-5		SEDDB	10.1016/j.gca.2004.04.027	GEOCHEMISTRY OF PERUVIAN NEAR-SURFACE SEDIMENTS	GEOCHIM COSMOCHIM ACTA	BOENING, P; BRUMSACK, H-J; BOETTCHER, M; SCHNETGER, B; KRIETE, C; KALLMEYER, J; BORCHERS, S	SO147	-10.3783	-78.5714	-1				ICPMS	SEDIMENTARY	UNKNOWN	UNKNOWN	SILICICLASTIC
SON0147-071/0-5		SEDDB	10.1016/j.gca.2004.04.027	GEOCHEMISTRY OF PERUVIAN NEAR-SURFACE SEDIMENTS	GEOCHIM COSMOCHIM ACTA	BOENING, P; BRUMSACK, H-J; BOETTCHER, M; SCHNETGER, B; KRIETE, C; KALLMEYER, J; BORCHERS, S	SO147	-10.3783	-78.5714	-1				XRF	SEDIMENTARY	UNKNOWN	UNKNOWN	SILICICLASTIC
SON0147-018/0-5		SEDDB	10.1016/j.gca.2004.04.027	GEOCHEMISTRY OF PERUVIAN NEAR-SURFACE SEDIMENTS	GEOCHIM COSMOCHIM ACTA	BOENING, P; BRUMSACK, H-J; BOETTCHER, M; SCHNETGER, B; KRIETE, C; KALLMEYER, J; BORCHERS, S	SO147	-11.0394	-78.0878	-1				ICPMS	SEDIMENTARY	UNKNOWN	UNKNOWN	SILICICLASTIC
SON0147-018/0-5		SEDDB	10.1016/j.gca.2004.04.027	GEOCHEMISTRY OF PERUVIAN NEAR-SURFACE SEDIMENTS	GEOCHIM COSMOCHIM ACTA	BOENING, P; BRUMSACK, H-J; BOETTCHER, M; SCHNETGER, B; KRIETE, C; KALLMEYER, J; BORCHERS, S	SO147	-11.0394	-78.0878	-1				XRF	SEDIMENTARY	UNKNOWN	UNKNOWN	SILICICLASTIC
SON0147-008/0-5		SEDDB	10.1016/j.gca.2004.04.027	GEOCHEMISTRY OF PERUVIAN NEAR-SURFACE SEDIMENTS	GEOCHIM COSMOCHIM ACTA	BOENING, P; BRUMSACK, H-J; BOETTCHER, M; SCHNETGER, B; KRIETE, C; KALLMEYER, J; BORCHERS, S	SO147	-11.9108	-77.8381	-1				ICPMS	SEDIMENTARY	UNKNOWN	UNKNOWN	SILICICLASTIC
SON0147-008/0-5		SEDDB	10.1016/j.gca.2004.04.027	GEOCHEMISTRY OF PERUVIAN NEAR-SURFACE SEDIMENTS	GEOCHIM COSMOCHIM ACTA	BOENING, P; BRUMSACK, H-J; BOETTCHER, M; SCHNETGER, B; KRIETE, C; KALLMEYER, J; BORCHERS, S	SO147	-11.9108	-77.8381	-1				XRF	SEDIMENTARY	UNKNOWN	UNKNOWN	SILICICLASTIC
SON0147-029/0-5		SEDDB	10.1016/j.gca.2004.04.027	GEOCHEMISTRY OF PERUVIAN NEAR-SURFACE SEDIMENTS	GEOCHIM COSMOCHIM ACTA	BOENING, P; BRUMSACK, H-J; BOETTCHER, M; SCHNETGER, B; KRIETE, C; KALLMEYER, J; BORCHERS, S	SO147	-10.0578	-78.305	-1				ICPMS	SEDIMENTARY	UNKNOWN	UNKNOWN	SILICICLASTIC
SON0147-029/0-5		SEDDB	10.1016/j.gca.2004.04.027	GEOCHEMISTRY OF PERUVIAN NEAR-SURFACE SEDIMENTS	GEOCHIM COSMOCHIM ACTA	BOENING, P; BRUMSACK, H-J; BOETTCHER, M; SCHNETGER, B; KRIETE, C; KALLMEYER, J; BORCHERS, S	SO147	-10.0578	-78.305	-1				XRF	SEDIMENTARY	UNKNOWN	UNKNOWN	SILICICLASTIC
SON0147-120/0-5		SEDDB	10.1016/j.gca.2004.04.027	GEOCHEMISTRY OF PERUVIAN NEAR-SURFACE SEDIMENTS	GEOCHIM COSMOCHIM ACTA	BOENING, P; BRUMSACK, H-J; BOETTCHER, M; SCHNETGER, B; KRIETE, C; KALLMEYER, J; BORCHERS, S	SO147	-12.8547	-76.7211	-1				ICPMS	SEDIMENTARY	UNKNOWN	UNKNOWN	SILICICLASTIC
SON0147-120/0-5		SEDDB	10.1016/j.gca.2004.04.027	GEOCHEMISTRY OF PERUVIAN NEAR-SURFACE SEDIMENTS	GEOCHIM COSMOCHIM ACTA	BOENING, P; BRUMSACK, H-J; BOETTCHER, M; SCHNETGER, B; KRIETE, C; KALLMEYER, J; BORCHERS, S	SO147	-12.8547	-76.7211	-1				XRF	SEDIMENTARY	UNKNOWN	UNKNOWN	SILICICLASTIC
SON0147-045/0-5		SEDDB	10.1016/j.gca.2004.04.027	GEOCHEMISTRY OF PERUVIAN NEAR-SURFACE SEDIMENTS	GEOCHIM COSMOCHIM ACTA	BOENING, P; BRUMSACK, H-J; BOETTCHER, M; SCHNETGER, B; KRIETE, C; KALLMEYER, J; BORCHERS, S	SO147	-9.6964	-78.6883	-1				ICPMS	SEDIMENTARY	UNKNOWN	UNKNOWN	SILICICLASTIC
SON0147-045/0-5		SEDDB	10.1016/j.gca.2004.04.027	GEOCHEMISTRY OF PERUVIAN NEAR-SURFACE SEDIMENTS	GEOCHIM COSMOCHIM ACTA	BOENING, P; BRUMSACK, H-J; BOETTCHER, M; SCHNETGER, B; KRIETE, C; KALLMEYER, J; BORCHERS, S	SO147	-9.6964	-78.6883	-1				XRF	SEDIMENTARY	UNKNOWN	UNKNOWN	SILICICLASTIC
SON0147-104/0-5		SEDDB	10.1016/j.gca.2004.04.027	GEOCHEMISTRY OF PERUVIAN NEAR-SURFACE SEDIMENTS	GEOCHIM COSMOCHIM ACTA	BOENING, P; BRUMSACK, H-J; BOETTCHER, M; SCHNETGER, B; KRIETE, C; KALLMEYER, J; BORCHERS, S	SO147	-12.0689	-76.6717	-1				ICPMS	SEDIMENTARY	UNKNOWN	UNKNOWN	SILICICLASTIC
SON0147-104/0-5		SEDDB	10.1016/j.gca.2004.04.027	GEOCHEMISTRY OF PERUVIAN NEAR-SURFACE SEDIMENTS	GEOCHIM COSMOCHIM ACTA	BOENING, P; BRUMSACK, H-J; BOETTCHER, M; SCHNETGER, B; KRIETE, C; KALLMEYER, J; BORCHERS, S	SO147	-12.0689	-76.6717	-1				XRF	SEDIMENTARY	UNKNOWN	UNKNOWN	SILICICLASTIC
SON0147-001/0-5		SEDDB	10.1016/j.gca.2004.04.027	GEOCHEMISTRY OF PERUVIAN NEAR-SURFACE SEDIMENTS	GEOCHIM COSMOCHIM ACTA	BOENING, P; BRUMSACK, H-J; BOETTCHER, M; SCHNETGER, B; KRIETE, C; KALLMEYER, J; BORCHERS, S	SO147	-12.9225	-76.9886	-1				ICPMS	SEDIMENTARY	UNKNOWN	UNKNOWN	SILICICLASTIC
SON0147-001/0-5		SEDDB	10.1016/j.gca.2004.04.027	GEOCHEMISTRY OF PERUVIAN NEAR-SURFACE SEDIMENTS	GEOCHIM COSMOCHIM ACTA	BOENING, P; BRUMSACK, H-J; BOETTCHER, M; SCHNETGER, B; KRIETE, C; KALLMEYER, J; BORCHERS, S	SO147	-12.9225	-76.9886	-1				XRF	SEDIMENTARY	UNKNOWN	UNKNOWN	SILICICLASTIC
SON0147-002/0-5		SEDDB	10.1016/j.gca.2004.04.027	GEOCHEMISTRY OF PERUVIAN NEAR-SURFACE SEDIMENTS	GEOCHIM COSMOCHIM ACTA	BOENING, P; BRUMSACK, H-J; BOETTCHER, M; SCHNETGER, B; KRIETE, C; KALLMEYER, J; BORCHERS, S	SO147	-11.5936	-77.5717	-1				ICPMS	SEDIMENTARY	UNKNOWN	UNKNOWN	SILICICLASTIC
SON0147-002/0-5		SEDDB	10.1016/j.gca.2004.04.027	GEOCHEMISTRY OF PERUVIAN NEAR-SURFACE SEDIMENTS	GEOCHIM COSMOCHIM ACTA	BOENING, P; BRUMSACK, H-J; BOETTCHER, M; SCHNETGER, B; KRIETE, C; KALLMEYER, J; BORCHERS, S	SO147	-11.5936	-77.5717	-1				XRF	SEDIMENTARY	UNKNOWN	UNKNOWN	SILICICLASTIC
CON0017-198		SEDDB	10.1016/S0012-821X(99)00047-3	RELATIONSHIPS BETWEEN Lu-Hf AND Sm-Nd ISOTOPIC SYSTEMS IN THE GLOBAL SEDIMENTARY SYSTEM	EARTH PLANET SCI LETT	VERVOORT, J; PATCHETT, P; BLICHERT-TOFT, J; ALBAREDE, F	RC17	-20.07	-163.97	-1				UNKNOWN	SEDIMENTARY	UNKNOWN	UNKNOWN	SILICICLASTIC
CON0017-198		SEDDB	10.1016/S0012-821X(99)00047-3	RELATIONSHIPS BETWEEN Lu-Hf AND Sm-Nd ISOTOPIC SYSTEMS IN THE GLOBAL SEDIMENTARY SYSTEM	EARTH PLANET SCI LETT	VERVOORT, J; PATCHETT, P; BLICHERT-TOFT, J; ALBAREDE, F	RC17	-20.07	-163.97	-1				ICPMS	SEDIMENTARY	UNKNOWN	UNKNOWN	SILICICLASTIC
GIL7605-055		SEDDB	10.1016/S0012-821X(99)00047-3	RELATIONSHIPS BETWEEN Lu-Hf AND Sm-Nd ISOTOPIC SYSTEMS IN THE GLOBAL SEDIMENTARY SYSTEM	EARTH PLANET SCI LETT	VERVOORT, J; PATCHETT, P; BLICHERT-TOFT, J; ALBAREDE, F	GS76-05	11.63	-57.25	-1				UNKNOWN	SEDIMENTARY	UNKNOWN	UNKNOWN	SILICICLASTIC
GIL7605-055		SEDDB	10.1016/S0012-821X(99)00047-3	RELATIONSHIPS BETWEEN Lu-Hf AND Sm-Nd ISOTOPIC SYSTEMS IN THE GLOBAL SEDIMENTARY SYSTEM	EARTH PLANET SCI LETT	VERVOORT, J; PATCHETT, P; BLICHERT-TOFT, J; ALBAREDE, F	GS76-05	11.63	-57.25	-1				ICPMS	SEDIMENTARY	UNKNOWN	UNKNOWN	SILICICLASTIC
VEM0021-196/212		SEDDB	10.1016/0012-821X(89)90079-4	THE GEOCHEMISTRY OF MARINE SEDIMENTS ISLAND ARC MAGMA GENESIS AND CRUST-MANTLE RECYCLING	EARTH PLANET SCI LETT	BEN OTHMAN, D; WHITE, W; PATCHETT, J	VM21	9.8	-136.18	-1				MS	SEDIMENTARY	UNKNOWN	UNKNOWN	SILICICLASTIC
VEM0021-196/212		SEDDB	10.1016/0012-821X(89)90079-4	THE GEOCHEMISTRY OF MARINE SEDIMENTS ISLAND ARC MAGMA GENESIS AND CRUST-MANTLE RECYCLING	EARTH PLANET SCI LETT	BEN OTHMAN, D; WHITE, W; PATCHETT, J	VM21	9.8	-136.18	-1				UNKNOWN	SEDIMENTARY	UNKNOWN	UNKNOWN	SILICICLASTIC
VEM0021-196/212		SEDDB	10.1016/0012-821X(89)90079-4	THE GEOCHEMISTRY OF MARINE SEDIMENTS ISLAND ARC MAGMA GENESIS AND CRUST-MANTLE RECYCLING	EARTH PLANET SCI LETT	BEN OTHMAN, D; WHITE, W; PATCHETT, J	VM21	9.8	-136.18	-1				MS-ID	SEDIMENTARY	UNKNOWN	UNKNOWN	SILICICLASTIC																		133.65		74.41		157.9	35.34	9.23	37.32		32.51		18.19		15.49
VEM0021-196/212		SEDDB	10.1016/0012-821X(89)90079-4	THE GEOCHEMISTRY OF MARINE SEDIMENTS ISLAND ARC MAGMA GENESIS AND CRUST-MANTLE RECYCLING	EARTH PLANET SCI LETT	BEN OTHMAN, D; WHITE, W; PATCHETT, J	VM21	9.8	-136.18	-1				IGN	SEDIMENTARY	UNKNOWN	UNKNOWN	SILICICLASTIC															8.98
VEM0021-196/212		SEDDB	10.1016/0012-821X(89)90079-4	THE GEOCHEMISTRY OF MARINE SEDIMENTS ISLAND ARC MAGMA GENESIS AND CRUST-MANTLE RECYCLING	EARTH PLANET SCI LETT	BEN OTHMAN, D; WHITE, W; PATCHETT, J	VM21	9.8	-136.18	-1				DCP	SEDIMENTARY	UNKNOWN	UNKNOWN	SILICICLASTIC	52.71	0.564	13.69				8.19	3.38	2.59		3.54	3.26	1.184	1.902
VEM0021-196/212		SEDDB	10.1016/0012-821X(89)90079-4	THE GEOCHEMISTRY OF MARINE SEDIMENTS ISLAND ARC MAGMA GENESIS AND CRUST-MANTLE RECYCLING	EARTH PLANET SCI LETT	BEN OTHMAN, D; WHITE, W; PATCHETT, J	VM21	9.8	-136.18	-1				ICPMS	SEDIMENTARY	UNKNOWN	UNKNOWN	SILICICLASTIC
VEM0021-196/212		SEDDB	10.1016/S0012-821X(99)00047-3	RELATIONSHIPS BETWEEN Lu-Hf AND Sm-Nd ISOTOPIC SYSTEMS IN THE GLOBAL SEDIMENTARY SYSTEM	EARTH PLANET SCI LETT	VERVOORT, J; PATCHETT, P; BLICHERT-TOFT, J; ALBAREDE, F	VM21	9.8	-136.18	-1				MS	SEDIMENTARY	UNKNOWN	UNKNOWN	SILICICLASTIC
VEM0021-196/212		SEDDB	10.1016/S0012-821X(99)00047-3	RELATIONSHIPS BETWEEN Lu-Hf AND Sm-Nd ISOTOPIC SYSTEMS IN THE GLOBAL SEDIMENTARY SYSTEM	EARTH PLANET SCI LETT	VERVOORT, J; PATCHETT, P; BLICHERT-TOFT, J; ALBAREDE, F	VM21	9.8	-136.18	-1				UNKNOWN	SEDIMENTARY	UNKNOWN	UNKNOWN	SILICICLASTIC
VEM0021-196/212		SEDDB	10.1016/S0012-821X(99)00047-3	RELATIONSHIPS BETWEEN Lu-Hf AND Sm-Nd ISOTOPIC SYSTEMS IN THE GLOBAL SEDIMENTARY SYSTEM	EARTH PLANET SCI LETT	VERVOORT, J; PATCHETT, P; BLICHERT-TOFT, J; ALBAREDE, F	VM21	9.8	-136.18	-1				MS-ID	SEDIMENTARY	UNKNOWN	UNKNOWN	SILICICLASTIC																		133.65		74.41		157.9	35.34	9.23	37.32		32.51		18.19		15.49
VEM0021-196/212		SEDDB	10.1016/S0012-821X(99)00047-3	RELATIONSHIPS BETWEEN Lu-Hf AND Sm-Nd ISOTOPIC SYSTEMS IN THE GLOBAL SEDIMENTARY SYSTEM	EARTH PLANET SCI LETT	VERVOORT, J; PATCHETT, P; BLICHERT-TOFT, J; ALBAREDE, F	VM21	9.8	-136.18	-1				IGN	SEDIMENTARY	UNKNOWN	UNKNOWN	SILICICLASTIC															8.98
VEM0021-196/212		SEDDB	10.1016/S0012-821X(99)00047-3	RELATIONSHIPS BETWEEN Lu-Hf AND Sm-Nd ISOTOPIC SYSTEMS IN THE GLOBAL SEDIMENTARY SYSTEM	EARTH PLANET SCI LETT	VERVOORT, J; PATCHETT, P; BLICHERT-TOFT, J; ALBAREDE, F	VM21	9.8	-136.18	-1				DCP	SEDIMENTARY	UNKNOWN	UNKNOWN	SILICICLASTIC	52.71	0.564	13.69				8.19	3.38	2.59		3.54	3.26	1.184	1.902
VEM0021-196/212		SEDDB	10.1016/S0012-821X(99)00047-3	RELATIONSHIPS BETWEEN Lu-Hf AND Sm-Nd ISOTOPIC SYSTEMS IN THE GLOBAL SEDIMENTARY SYSTEM	EARTH PLANET SCI LETT	VERVOORT, J; PATCHETT, P; BLICHERT-TOFT, J; ALBAREDE, F	VM21	9.8	-136.18	-1				ICPMS	SEDIMENTARY	UNKNOWN	UNKNOWN	SILICICLASTIC
VEM0021-196/212		SEDDB	10.1016/S0009-2541(97)00150-2	THE CHEMICAL COMPOSITION OF SUBDUCTING SEDIMENT AND ITS CONSEQUENCES FOR THE CRUST AND MANTLE	CHEMICAL GEOLOGY	PLANK, T; LANGMUIR, C	VM21	9.8	-136.18	-1				MS	SEDIMENTARY	UNKNOWN	UNKNOWN	SILICICLASTIC
VEM0021-196/212		SEDDB	10.1016/S0009-2541(97)00150-2	THE CHEMICAL COMPOSITION OF SUBDUCTING SEDIMENT AND ITS CONSEQUENCES FOR THE CRUST AND MANTLE	CHEMICAL GEOLOGY	PLANK, T; LANGMUIR, C	VM21	9.8	-136.18	-1				UNKNOWN	SEDIMENTARY	UNKNOWN	UNKNOWN	SILICICLASTIC
VEM0021-196/212		SEDDB	10.1016/S0009-2541(97)00150-2	THE CHEMICAL COMPOSITION OF SUBDUCTING SEDIMENT AND ITS CONSEQUENCES FOR THE CRUST AND MANTLE	CHEMICAL GEOLOGY	PLANK, T; LANGMUIR, C	VM21	9.8	-136.18	-1				MS-ID	SEDIMENTARY	UNKNOWN	UNKNOWN	SILICICLASTIC																		133.65		74.41		157.9	35.34	9.23	37.32		32.51		18.19		15.49
VEM0021-196/212		SEDDB	10.1016/S0009-2541(97)00150-2	THE CHEMICAL COMPOSITION OF SUBDUCTING SEDIMENT AND ITS CONSEQUENCES FOR THE CRUST AND MANTLE	CHEMICAL GEOLOGY	PLANK, T; LANGMUIR, C	VM21	9.8	-136.18	-1				IGN	SEDIMENTARY	UNKNOWN	UNKNOWN	SILICICLASTIC															8.98
VEM0021-196/212		SEDDB	10.1016/S0009-2541(97)00150-2	THE CHEMICAL COMPOSITION OF SUBDUCTING SEDIMENT AND ITS CONSEQUENCES FOR THE CRUST AND MANTLE	CHEMICAL GEOLOGY	PLANK, T; LANGMUIR, C	VM21	9.8	-136.18	-1				DCP	SEDIMENTARY	UNKNOWN	UNKNOWN	SILICICLASTIC	52.71	0.564	13.69				8.19	3.38	2.59		3.54	3.26	1.184	1.902
VEM0021-196/212		SEDDB	10.1016/S0009-2541(97)00150-2	THE CHEMICAL COMPOSITION OF SUBDUCTING SEDIMENT AND ITS CONSEQUENCES FOR THE CRUST AND MANTLE	CHEMICAL GEOLOGY	PLANK, T; LANGMUIR, C	VM21	9.8	-136.18	-1				ICPMS	SEDIMENTARY	UNKNOWN	UNKNOWN	SILICICLASTIC
VEM0025-005/31-33		SEDDB	10.1016/0012-821X(89)90079-4	THE GEOCHEMISTRY OF MARINE SEDIMENTS ISLAND ARC MAGMA GENESIS AND CRUST-MANTLE RECYCLING	EARTH PLANET SCI LETT	BEN OTHMAN, D; WHITE, W; PATCHETT, J	VM25	24.73	-61.05	-1				MS	SEDIMENTARY	UNKNOWN	UNKNOWN	SILICICLASTIC
VEM0025-005/31-33		SEDDB	10.1016/0012-821X(89)90079-4	THE GEOCHEMISTRY OF MARINE SEDIMENTS ISLAND ARC MAGMA GENESIS AND CRUST-MANTLE RECYCLING	EARTH PLANET SCI LETT	BEN OTHMAN, D; WHITE, W; PATCHETT, J	VM25	24.73	-61.05	-1				UNKNOWN	SEDIMENTARY	UNKNOWN	UNKNOWN	SILICICLASTIC
VEM0025-005/31-33		SEDDB	10.1016/0012-821X(89)90079-4	THE GEOCHEMISTRY OF MARINE SEDIMENTS ISLAND ARC MAGMA GENESIS AND CRUST-MANTLE RECYCLING	EARTH PLANET SCI LETT	BEN OTHMAN, D; WHITE, W; PATCHETT, J	VM25	24.73	-61.05	-1				MS-ID	SEDIMENTARY	UNKNOWN	UNKNOWN	SILICICLASTIC
VEM0025-005/31-33		SEDDB	10.1016/0012-821X(89)90079-4	THE GEOCHEMISTRY OF MARINE SEDIMENTS ISLAND ARC MAGMA GENESIS AND CRUST-MANTLE RECYCLING	EARTH PLANET SCI LETT	BEN OTHMAN, D; WHITE, W; PATCHETT, J	VM25	24.73	-61.05	-1				IGN	SEDIMENTARY	UNKNOWN	UNKNOWN	SILICICLASTIC															7.96
VEM0025-005/31-33		SEDDB	10.1016/0012-821X(89)90079-4	THE GEOCHEMISTRY OF MARINE SEDIMENTS ISLAND ARC MAGMA GENESIS AND CRUST-MANTLE RECYCLING	EARTH PLANET SCI LETT	BEN OTHMAN, D; WHITE, W; PATCHETT, J	VM25	24.73	-61.05	-1				DCP	SEDIMENTARY	UNKNOWN	UNKNOWN	SILICICLASTIC	52.24	0.821	18.58				7.39	3.48	1.09		3.89	3.6	0.211	0.745				104.11		129.47		118.49	25.51	6.39	28.62		25.96		15.24		13.4
VEM0025-005/31-33		SEDDB	10.1016/0012-821X(89)90079-4	THE GEOCHEMISTRY OF MARINE SEDIMENTS ISLAND ARC MAGMA GENESIS AND CRUST-MANTLE RECYCLING	EARTH PLANET SCI LETT	BEN OTHMAN, D; WHITE, W; PATCHETT, J	VM25	24.73	-61.05	-1				TIMS	SEDIMENTARY	UNKNOWN	UNKNOWN	SILICICLASTIC
VEM0025-005/31-33		SEDDB	10.1016/0012-821X(89)90079-4	THE GEOCHEMISTRY OF MARINE SEDIMENTS ISLAND ARC MAGMA GENESIS AND CRUST-MANTLE RECYCLING	EARTH PLANET SCI LETT	BEN OTHMAN, D; WHITE, W; PATCHETT, J	VM25	24.73	-61.05	-1				ICPMS	SEDIMENTARY	UNKNOWN	UNKNOWN	SILICICLASTIC
VEM0025-005/31-33		SEDDB	10.1016/0012-821X(89)90079-4	THE GEOCHEMISTRY OF MARINE SEDIMENTS ISLAND ARC MAGMA GENESIS AND CRUST-MANTLE RECYCLING	EARTH PLANET SCI LETT	BEN OTHMAN, D; WHITE, W; PATCHETT, J	VM25	24.73	-61.05	-1				TIMS-ID	SEDIMENTARY	UNKNOWN	UNKNOWN	SILICICLASTIC
VEM0025-005/31-33		SEDDB	10.1016/S0012-821X(99)00047-3	RELATIONSHIPS BETWEEN Lu-Hf AND Sm-Nd ISOTOPIC SYSTEMS IN THE GLOBAL SEDIMENTARY SYSTEM	EARTH PLANET SCI LETT	VERVOORT, J; PATCHETT, P; BLICHERT-TOFT, J; ALBAREDE, F	VM25	24.73	-61.05	-1				MS	SEDIMENTARY	UNKNOWN	UNKNOWN	SILICICLASTIC
VEM0025-005/31-33		SEDDB	10.1016/S0012-821X(99)00047-3	RELATIONSHIPS BETWEEN Lu-Hf AND Sm-Nd ISOTOPIC SYSTEMS IN THE GLOBAL SEDIMENTARY SYSTEM	EARTH PLANET SCI LETT	VERVOORT, J; PATCHETT, P; BLICHERT-TOFT, J; ALBAREDE, F	VM25	24.73	-61.05	-1				UNKNOWN	SEDIMENTARY	UNKNOWN	UNKNOWN	SILICICLASTIC
VEM0025-005/31-33		SEDDB	10.1016/S0012-821X(99)00047-3	RELATIONSHIPS BETWEEN Lu-Hf AND Sm-Nd ISOTOPIC SYSTEMS IN THE GLOBAL SEDIMENTARY SYSTEM	EARTH PLANET SCI LETT	VERVOORT, J; PATCHETT, P; BLICHERT-TOFT, J; ALBAREDE, F	VM25	24.73	-61.05	-1				MS-ID	SEDIMENTARY	UNKNOWN	UNKNOWN	SILICICLASTIC
VEM0025-005/31-33		SEDDB	10.1016/S0012-821X(99)00047-3	RELATIONSHIPS BETWEEN Lu-Hf AND Sm-Nd ISOTOPIC SYSTEMS IN THE GLOBAL SEDIMENTARY SYSTEM	EARTH PLANET SCI LETT	VERVOORT, J; PATCHETT, P; BLICHERT-TOFT, J; ALBAREDE, F	VM25	24.73	-61.05	-1				IGN	SEDIMENTARY	UNKNOWN	UNKNOWN	SILICICLASTIC															7.96
VEM0025-005/31-33		SEDDB	10.1016/S0012-821X(99)00047-3	RELATIONSHIPS BETWEEN Lu-Hf AND Sm-Nd ISOTOPIC SYSTEMS IN THE GLOBAL SEDIMENTARY SYSTEM	EARTH PLANET SCI LETT	VERVOORT, J; PATCHETT, P; BLICHERT-TOFT, J; ALBAREDE, F	VM25	24.73	-61.05	-1				DCP	SEDIMENTARY	UNKNOWN	UNKNOWN	SILICICLASTIC	52.24	0.821	18.58				7.39	3.48	1.09		3.89	3.6	0.211	0.745				104.11		129.47		118.49	25.51	6.39	28.62		25.96		15.24		13.4
VEM0025-005/31-33		SEDDB	10.1016/S0012-821X(99)00047-3	RELATIONSHIPS BETWEEN Lu-Hf AND Sm-Nd ISOTOPIC SYSTEMS IN THE GLOBAL SEDIMENTARY SYSTEM	EARTH PLANET SCI LETT	VERVOORT, J; PATCHETT, P; BLICHERT-TOFT, J; ALBAREDE, F	VM25	24.73	-61.05	-1				TIMS	SEDIMENTARY	UNKNOWN	UNKNOWN	SILICICLASTIC
VEM0025-005/31-33		SEDDB	10.1016/S0012-821X(99)00047-3	RELATIONSHIPS BETWEEN Lu-Hf AND Sm-Nd ISOTOPIC SYSTEMS IN THE GLOBAL SEDIMENTARY SYSTEM	EARTH PLANET SCI LETT	VERVOORT, J; PATCHETT, P; BLICHERT-TOFT, J; ALBAREDE, F	VM25	24.73	-61.05	-1				ICPMS	SEDIMENTARY	UNKNOWN	UNKNOWN	SILICICLASTIC
VEM0025-005/31-33		SEDDB	10.1016/S0012-821X(99)00047-3	RELATIONSHIPS BETWEEN Lu-Hf AND Sm-Nd ISOTOPIC SYSTEMS IN THE GLOBAL SEDIMENTARY SYSTEM	EARTH PLANET SCI LETT	VERVOORT, J; PATCHETT, P; BLICHERT-TOFT, J; ALBAREDE, F	VM25	24.73	-61.05	-1				TIMS-ID	SEDIMENTARY	UNKNOWN	UNKNOWN	SILICICLASTIC
VEM0025-005/31-33		SEDDB	10.1016/S0009-2541(97)00150-2	THE CHEMICAL COMPOSITION OF SUBDUCTING SEDIMENT AND ITS CONSEQUENCES FOR THE CRUST AND MANTLE	CHEMICAL GEOLOGY	PLANK, T; LANGMUIR, C	VM25	24.73	-61.05	-1				MS	SEDIMENTARY	UNKNOWN	UNKNOWN	SILICICLASTIC
VEM0025-005/31-33		SEDDB	10.1016/S0009-2541(97)00150-2	THE CHEMICAL COMPOSITION OF SUBDUCTING SEDIMENT AND ITS CONSEQUENCES FOR THE CRUST AND MANTLE	CHEMICAL GEOLOGY	PLANK, T; LANGMUIR, C	VM25	24.73	-61.05	-1				UNKNOWN	SEDIMENTARY	UNKNOWN	UNKNOWN	SILICICLASTIC
VEM0025-005/31-33		SEDDB	10.1016/S0009-2541(97)00150-2	THE CHEMICAL COMPOSITION OF SUBDUCTING SEDIMENT AND ITS CONSEQUENCES FOR THE CRUST AND MANTLE	CHEMICAL GEOLOGY	PLANK, T; LANGMUIR, C	VM25	24.73	-61.05	-1				MS-ID	SEDIMENTARY	UNKNOWN	UNKNOWN	SILICICLASTIC
VEM0025-005/31-33		SEDDB	10.1016/S0009-2541(97)00150-2	THE CHEMICAL COMPOSITION OF SUBDUCTING SEDIMENT AND ITS CONSEQUENCES FOR THE CRUST AND MANTLE	CHEMICAL GEOLOGY	PLANK, T; LANGMUIR, C	VM25	24.73	-61.05	-1				IGN	SEDIMENTARY	UNKNOWN	UNKNOWN	SILICICLASTIC															7.96
VEM0025-005/31-33		SEDDB	10.1016/S0009-2541(97)00150-2	THE CHEMICAL COMPOSITION OF SUBDUCTING SEDIMENT AND ITS CONSEQUENCES FOR THE CRUST AND MANTLE	CHEMICAL GEOLOGY	PLANK, T; LANGMUIR, C	VM25	24.73	-61.05	-1				DCP	SEDIMENTARY	UNKNOWN	UNKNOWN	SILICICLASTIC	52.24	0.821	18.58				7.39	3.48	1.09		3.89	3.6	0.211	0.745				104.11		129.47		118.49	25.51	6.39	28.62		25.96		15.24		13.4
VEM0025-005/31-33		SEDDB	10.1016/S0009-2541(97)00150-2	THE CHEMICAL COMPOSITION OF SUBDUCTING SEDIMENT AND ITS CONSEQUENCES FOR THE CRUST AND MANTLE	CHEMICAL GEOLOGY	PLANK, T; LANGMUIR, C	VM25	24.73	-61.05	-1				TIMS	SEDIMENTARY	UNKNOWN	UNKNOWN	SILICICLASTIC
VEM0025-005/31-33		SEDDB	10.1016/S0009-2541(97)00150-2	THE CHEMICAL COMPOSITION OF SUBDUCTING SEDIMENT AND ITS CONSEQUENCES FOR THE CRUST AND MANTLE	CHEMICAL GEOLOGY	PLANK, T; LANGMUIR, C	VM25	24.73	-61.05	-1				ICPMS	SEDIMENTARY	UNKNOWN	UNKNOWN	SILICICLASTIC
VEM0025-005/31-33		SEDDB	10.1016/S0009-2541(97)00150-2	THE CHEMICAL COMPOSITION OF SUBDUCTING SEDIMENT AND ITS CONSEQUENCES FOR THE CRUST AND MANTLE	CHEMICAL GEOLOGY	PLANK, T; LANGMUIR, C	VM25	24.73	-61.05	-1				TIMS-ID	SEDIMENTARY	UNKNOWN	UNKNOWN	SILICICLASTIC
VEM0024-209/45-48		SEDDB	10.1016/0012-821X(89)90079-4	THE GEOCHEMISTRY OF MARINE SEDIMENTS ISLAND ARC MAGMA GENESIS AND CRUST-MANTLE RECYCLING	EARTH PLANET SCI LETT	BEN OTHMAN, D; WHITE, W; PATCHETT, J	VM24	-34.75	39.73	-1				MS	SEDIMENTARY	UNKNOWN	UNKNOWN	SILICICLASTIC
VEM0024-209/45-48		SEDDB	10.1016/0012-821X(89)90079-4	THE GEOCHEMISTRY OF MARINE SEDIMENTS ISLAND ARC MAGMA GENESIS AND CRUST-MANTLE RECYCLING	EARTH PLANET SCI LETT	BEN OTHMAN, D; WHITE, W; PATCHETT, J	VM24	-34.75	39.73	-1				UNKNOWN	SEDIMENTARY	UNKNOWN	UNKNOWN	SILICICLASTIC
VEM0024-209/45-48		SEDDB	10.1016/0012-821X(89)90079-4	THE GEOCHEMISTRY OF MARINE SEDIMENTS ISLAND ARC MAGMA GENESIS AND CRUST-MANTLE RECYCLING	EARTH PLANET SCI LETT	BEN OTHMAN, D; WHITE, W; PATCHETT, J	VM24	-34.75	39.73	-1				MS-ID	SEDIMENTARY	UNKNOWN	UNKNOWN	SILICICLASTIC
VEM0024-209/45-48		SEDDB	10.1016/0012-821X(89)90079-4	THE GEOCHEMISTRY OF MARINE SEDIMENTS ISLAND ARC MAGMA GENESIS AND CRUST-MANTLE RECYCLING	EARTH PLANET SCI LETT	BEN OTHMAN, D; WHITE, W; PATCHETT, J	VM24	-34.75	39.73	-1				IGN	SEDIMENTARY	UNKNOWN	UNKNOWN	SILICICLASTIC															8.94
VEM0024-209/45-48		SEDDB	10.1016/0012-821X(89)90079-4	THE GEOCHEMISTRY OF MARINE SEDIMENTS ISLAND ARC MAGMA GENESIS AND CRUST-MANTLE RECYCLING	EARTH PLANET SCI LETT	BEN OTHMAN, D; WHITE, W; PATCHETT, J	VM24	-34.75	39.73	-1				DCP	SEDIMENTARY	UNKNOWN	UNKNOWN	SILICICLASTIC	54.02	0.9	19.84				7.19	3.23	0.45		2.53	2.67	0.121	0.095
VEM0024-209/45-48		SEDDB	10.1016/0012-821X(89)90079-4	THE GEOCHEMISTRY OF MARINE SEDIMENTS ISLAND ARC MAGMA GENESIS AND CRUST-MANTLE RECYCLING	EARTH PLANET SCI LETT	BEN OTHMAN, D; WHITE, W; PATCHETT, J	VM24	-34.75	39.73	-1				ICPMS	SEDIMENTARY	UNKNOWN	UNKNOWN	SILICICLASTIC
VEM0024-209/45-48		SEDDB	10.1016/S0012-821X(99)00047-3	RELATIONSHIPS BETWEEN Lu-Hf AND Sm-Nd ISOTOPIC SYSTEMS IN THE GLOBAL SEDIMENTARY SYSTEM	EARTH PLANET SCI LETT	VERVOORT, J; PATCHETT, P; BLICHERT-TOFT, J; ALBAREDE, F	VM24	-34.75	39.73	-1				MS	SEDIMENTARY	UNKNOWN	UNKNOWN	SILICICLASTIC
VEM0024-209/45-48		SEDDB	10.1016/S0012-821X(99)00047-3	RELATIONSHIPS BETWEEN Lu-Hf AND Sm-Nd ISOTOPIC SYSTEMS IN THE GLOBAL SEDIMENTARY SYSTEM	EARTH PLANET SCI LETT	VERVOORT, J; PATCHETT, P; BLICHERT-TOFT, J; ALBAREDE, F	VM24	-34.75	39.73	-1				UNKNOWN	SEDIMENTARY	UNKNOWN	UNKNOWN	SILICICLASTIC
VEM0024-209/45-48		SEDDB	10.1016/S0012-821X(99)00047-3	RELATIONSHIPS BETWEEN Lu-Hf AND Sm-Nd ISOTOPIC SYSTEMS IN THE GLOBAL SEDIMENTARY SYSTEM	EARTH PLANET SCI LETT	VERVOORT, J; PATCHETT, P; BLICHERT-TOFT, J; ALBAREDE, F	VM24	-34.75	39.73	-1				MS-ID	SEDIMENTARY	UNKNOWN	UNKNOWN	SILICICLASTIC
VEM0024-209/45-48		SEDDB	10.1016/S0012-821X(99)00047-3	RELATIONSHIPS BETWEEN Lu-Hf AND Sm-Nd ISOTOPIC SYSTEMS IN THE GLOBAL SEDIMENTARY SYSTEM	EARTH PLANET SCI LETT	VERVOORT, J; PATCHETT, P; BLICHERT-TOFT, J; ALBAREDE, F	VM24	-34.75	39.73	-1				IGN	SEDIMENTARY	UNKNOWN	UNKNOWN	SILICICLASTIC															8.94
VEM0024-209/45-48		SEDDB	10.1016/S0012-821X(99)00047-3	RELATIONSHIPS BETWEEN Lu-Hf AND Sm-Nd ISOTOPIC SYSTEMS IN THE GLOBAL SEDIMENTARY SYSTEM	EARTH PLANET SCI LETT	VERVOORT, J; PATCHETT, P; BLICHERT-TOFT, J; ALBAREDE, F	VM24	-34.75	39.73	-1				DCP	SEDIMENTARY	UNKNOWN	UNKNOWN	SILICICLASTIC	54.02	0.9	19.84				7.19	3.23	0.45		2.53	2.67	0.121	0.095
VEM0024-209/45-48		SEDDB	10.1016/S0012-821X(99)00047-3	RELATIONSHIPS BETWEEN Lu-Hf AND Sm-Nd ISOTOPIC SYSTEMS IN THE GLOBAL SEDIMENTARY SYSTEM	EARTH PLANET SCI LETT	VERVOORT, J; PATCHETT, P; BLICHERT-TOFT, J; ALBAREDE, F	VM24	-34.75	39.73	-1				ICPMS	SEDIMENTARY	UNKNOWN	UNKNOWN	SILICICLASTIC
VEM0024-209/45-48		SEDDB	10.1016/S0009-2541(97)00150-2	THE CHEMICAL COMPOSITION OF SUBDUCTING SEDIMENT AND ITS CONSEQUENCES FOR THE CRUST AND MANTLE	CHEMICAL GEOLOGY	PLANK, T; LANGMUIR, C	VM24	-34.75	39.73	-1				MS	SEDIMENTARY	UNKNOWN	UNKNOWN	SILICICLASTIC
VEM0024-209/45-48		SEDDB	10.1016/S0009-2541(97)00150-2	THE CHEMICAL COMPOSITION OF SUBDUCTING SEDIMENT AND ITS CONSEQUENCES FOR THE CRUST AND MANTLE	CHEMICAL GEOLOGY	PLANK, T; LANGMUIR, C	VM24	-34.75	39.73	-1				UNKNOWN	SEDIMENTARY	UNKNOWN	UNKNOWN	SILICICLASTIC
VEM0024-209/45-48		SEDDB	10.1016/S0009-2541(97)00150-2	THE CHEMICAL COMPOSITION OF SUBDUCTING SEDIMENT AND ITS CONSEQUENCES FOR THE CRUST AND MANTLE	CHEMICAL GEOLOGY	PLANK, T; LANGMUIR, C	VM24	-34.75	39.73	-1				MS-ID	SEDIMENTARY	UNKNOWN	UNKNOWN	SILICICLASTIC
VEM0024-209/45-48		SEDDB	10.1016/S0009-2541(97)00150-2	THE CHEMICAL COMPOSITION OF SUBDUCTING SEDIMENT AND ITS CONSEQUENCES FOR THE CRUST AND MANTLE	CHEMICAL GEOLOGY	PLANK, T; LANGMUIR, C	VM24	-34.75	39.73	-1				IGN	SEDIMENTARY	UNKNOWN	UNKNOWN	SILICICLASTIC															8.94
VEM0024-209/45-48		SEDDB	10.1016/S0009-2541(97)00150-2	THE CHEMICAL COMPOSITION OF SUBDUCTING SEDIMENT AND ITS CONSEQUENCES FOR THE CRUST AND MANTLE	CHEMICAL GEOLOGY	PLANK, T; LANGMUIR, C	VM24	-34.75	39.73	-1				DCP	SEDIMENTARY	UNKNOWN	UNKNOWN	SILICICLASTIC	54.02	0.9	19.84				7.19	3.23	0.45		2.53	2.67	0.121	0.095
VEM0024-209/45-48		SEDDB	10.1016/S0009-2541(97)00150-2	THE CHEMICAL COMPOSITION OF SUBDUCTING SEDIMENT AND ITS CONSEQUENCES FOR THE CRUST AND MANTLE	CHEMICAL GEOLOGY	PLANK, T; LANGMUIR, C	VM24	-34.75	39.73	-1				ICPMS	SEDIMENTARY	UNKNOWN	UNKNOWN	SILICICLASTIC
THO0013-148/0-1		SEDDB	10.1016/0016-7037(96)00236-0	SCAVENGED EXCESS ALUMINUM AND ITS RELATIONSHIP TO BULK TITANIUM IN BIOGENIC SEDIMENT FROM THE CENTRAL EQUATORIAL PACIFIC OCEAN	GEOCHIM COSMOCHIM ACTA	MURRAY, R; LEINEN, M	TT013	8.93	-139.87	-1				ICPES	SEDIMENTARY	UNKNOWN	UNKNOWN	SILICICLASTIC
THO0013-148/0-1		SEDDB	10.1016/0016-7037(96)00236-0	SCAVENGED EXCESS ALUMINUM AND ITS RELATIONSHIP TO BULK TITANIUM IN BIOGENIC SEDIMENT FROM THE CENTRAL EQUATORIAL PACIFIC OCEAN	GEOCHIM COSMOCHIM ACTA	MURRAY, R; LEINEN, M	TT013	8.93	-139.87	-1				CALC	SEDIMENTARY	UNKNOWN	UNKNOWN	SILICICLASTIC																			2
BAIJPYN2-008-SED		SEDDB	10.1016/0016-7037(81)90184-8	RARE EARTH ELEMENT GEOCHEMISTRY OF OCEANIC FERROMANGANESE NODULES AND ASSOCIATED SEDIMENTS	GEOCHIM COSMOCHIM ACTA	ELDERFIELD, H; HAWKESWORTH, C; GREAVES, M; CALVERT, S	JAPANYON	40.483	172.55	-1				COL	SEDIMENTARY	UNKNOWN	UNKNOWN	SILICICLASTIC
BAIJPYN2-008-SED		SEDDB	10.1016/0016-7037(81)90184-8	RARE EARTH ELEMENT GEOCHEMISTRY OF OCEANIC FERROMANGANESE NODULES AND ASSOCIATED SEDIMENTS	GEOCHIM COSMOCHIM ACTA	ELDERFIELD, H; HAWKESWORTH, C; GREAVES, M; CALVERT, S	JAPANYON	40.483	172.55	-1				AAS	SEDIMENTARY	UNKNOWN	UNKNOWN	SILICICLASTIC
BAIJPYN2-008-SED		SEDDB	10.1016/0016-7037(81)90184-8	RARE EARTH ELEMENT GEOCHEMISTRY OF OCEANIC FERROMANGANESE NODULES AND ASSOCIATED SEDIMENTS	GEOCHIM COSMOCHIM ACTA	ELDERFIELD, H; HAWKESWORTH, C; GREAVES, M; CALVERT, S	JAPANYON	40.483	172.55	-1				MS	SEDIMENTARY	UNKNOWN	UNKNOWN	SILICICLASTIC
BAIJPYN2-008-SED		SEDDB	10.1016/0016-7037(81)90184-8	RARE EARTH ELEMENT GEOCHEMISTRY OF OCEANIC FERROMANGANESE NODULES AND ASSOCIATED SEDIMENTS	GEOCHIM COSMOCHIM ACTA	ELDERFIELD, H; HAWKESWORTH, C; GREAVES, M; CALVERT, S	JAPANYON	40.483	172.55	-1				MS-ID	SEDIMENTARY	UNKNOWN	UNKNOWN	SILICICLASTIC																		18.7		35		22.2	4.85	1.13	4.35		4.09		2.19		1.92
ARGAMPH-085-SED		SEDDB	10.1016/0016-7037(81)90184-8	RARE EARTH ELEMENT GEOCHEMISTRY OF OCEANIC FERROMANGANESE NODULES AND ASSOCIATED SEDIMENTS	GEOCHIM COSMOCHIM ACTA	ELDERFIELD, H; HAWKESWORTH, C; GREAVES, M; CALVERT, S	AMPHITRITE	-11.583	-158.517	-1				COL	SEDIMENTARY	UNKNOWN	UNKNOWN	SILICICLASTIC
ARGAMPH-085-SED		SEDDB	10.1016/0016-7037(81)90184-8	RARE EARTH ELEMENT GEOCHEMISTRY OF OCEANIC FERROMANGANESE NODULES AND ASSOCIATED SEDIMENTS	GEOCHIM COSMOCHIM ACTA	ELDERFIELD, H; HAWKESWORTH, C; GREAVES, M; CALVERT, S	AMPHITRITE	-11.583	-158.517	-1				AAS	SEDIMENTARY	UNKNOWN	UNKNOWN	SILICICLASTIC
ARGAMPH-085-SED		SEDDB	10.1016/0016-7037(81)90184-8	RARE EARTH ELEMENT GEOCHEMISTRY OF OCEANIC FERROMANGANESE NODULES AND ASSOCIATED SEDIMENTS	GEOCHIM COSMOCHIM ACTA	ELDERFIELD, H; HAWKESWORTH, C; GREAVES, M; CALVERT, S	AMPHITRITE	-11.583	-158.517	-1				MS-ID	SEDIMENTARY	UNKNOWN	UNKNOWN	SILICICLASTIC																		105		465		161	35.9	8.05	39.3		36.7		22.4		19.7
ARGTRIP-009-SED		SEDDB	10.1016/0016-7037(81)90184-8	RARE EARTH ELEMENT GEOCHEMISTRY OF OCEANIC FERROMANGANESE NODULES AND ASSOCIATED SEDIMENTS	GEOCHIM COSMOCHIM ACTA	ELDERFIELD, H; HAWKESWORTH, C; GREAVES, M; CALVERT, S	TRIPOD	20.8	-118.017	-1				COL	SEDIMENTARY	UNKNOWN	UNKNOWN	SILICICLASTIC
ARGTRIP-009-SED		SEDDB	10.1016/0016-7037(81)90184-8	RARE EARTH ELEMENT GEOCHEMISTRY OF OCEANIC FERROMANGANESE NODULES AND ASSOCIATED SEDIMENTS	GEOCHIM COSMOCHIM ACTA	ELDERFIELD, H; HAWKESWORTH, C; GREAVES, M; CALVERT, S	TRIPOD	20.8	-118.017	-1				AAS	SEDIMENTARY	UNKNOWN	UNKNOWN	SILICICLASTIC
ARGTRIP-009-SED		SEDDB	10.1016/0016-7037(81)90184-8	RARE EARTH ELEMENT GEOCHEMISTRY OF OCEANIC FERROMANGANESE NODULES AND ASSOCIATED SEDIMENTS	GEOCHIM COSMOCHIM ACTA	ELDERFIELD, H; HAWKESWORTH, C; GREAVES, M; CALVERT, S	TRIPOD	20.8	-118.017	-1				MS-ID	SEDIMENTARY	UNKNOWN	UNKNOWN	SILICICLASTIC																		41.9		150		65.8	15.4	3.54	14.8		13.1		7.23		6.54
CON0012-344/320		SEDDB	10.1016/S0012-821X(99)00184-3	EROSIONAL HISTORY OF THE HIMALAYAN AND BURMAN RANGES DURING THE LAST TWO GLACIAL-INTERGLACIAL CYCLES	EARTH PLANET SCI LETT	COLIN, C; COLIN, C; TURPIN, L; TURPIN, L; BERTRAUX, J; BERTRAUX, J; DESPRAIRIES, A; DESPRAIRIES, A; KISSEL, C; KISSEL, C	RC12	12.7667	96.0903	-1	0.0118		1.806	TIMS	SEDIMENTARY	UNKNOWN	UNKNOWN	SILICICLASTIC
CON0012-344/320		SEDDB	10.1016/S0012-821X(99)00184-3	EROSIONAL HISTORY OF THE HIMALAYAN AND BURMAN RANGES DURING THE LAST TWO GLACIAL-INTERGLACIAL CYCLES	EARTH PLANET SCI LETT	COLIN, C; COLIN, C; TURPIN, L; TURPIN, L; BERTRAUX, J; BERTRAUX, J; DESPRAIRIES, A; DESPRAIRIES, A; KISSEL, C; KISSEL, C	RC12	12.7667	96.0903	-1	0.0118		1.806	TIMS-ID	SEDIMENTARY	UNKNOWN	UNKNOWN	SILICICLASTIC																						28.5
VEM0029-021/2		SEDDB	10.1016/S0012-821X(99)00184-3	EROSIONAL HISTORY OF THE HIMALAYAN AND BURMAN RANGES DURING THE LAST TWO GLACIAL-INTERGLACIAL CYCLES	EARTH PLANET SCI LETT	COLIN, C; COLIN, C; TURPIN, L; TURPIN, L; BERTRAUX, J; BERTRAUX, J; DESPRAIRIES, A; DESPRAIRIES, A; KISSEL, C; KISSEL, C	VM29	9.65	81.75	-1	0		0.0118	TIMS	SEDIMENTARY	UNKNOWN	UNKNOWN	SILICICLASTIC
VEM0029-021/2		SEDDB	10.1016/S0012-821X(99)00184-3	EROSIONAL HISTORY OF THE HIMALAYAN AND BURMAN RANGES DURING THE LAST TWO GLACIAL-INTERGLACIAL CYCLES	EARTH PLANET SCI LETT	COLIN, C; COLIN, C; TURPIN, L; TURPIN, L; BERTRAUX, J; BERTRAUX, J; DESPRAIRIES, A; DESPRAIRIES, A; KISSEL, C; KISSEL, C	VM29	9.65	81.75	-1	0		0.0118	TIMS-ID	SEDIMENTARY	UNKNOWN	UNKNOWN	SILICICLASTIC																						25.1
DUF0077-169/24		SEDDB	10.1016/S0012-821X(99)00184-3	EROSIONAL HISTORY OF THE HIMALAYAN AND BURMAN RANGES DURING THE LAST TWO GLACIAL-INTERGLACIAL CYCLES	EARTH PLANET SCI LETT	COLIN, C; COLIN, C; TURPIN, L; TURPIN, L; BERTRAUX, J; BERTRAUX, J; DESPRAIRIES, A; DESPRAIRIES, A; KISSEL, C; KISSEL, C	MD1977	10.2083	95.0758	-1	0		0.0118	TIMS	SEDIMENTARY	UNKNOWN	UNKNOWN	SILICICLASTIC
DUF0077-169/24		SEDDB	10.1016/S0012-821X(99)00184-3	EROSIONAL HISTORY OF THE HIMALAYAN AND BURMAN RANGES DURING THE LAST TWO GLACIAL-INTERGLACIAL CYCLES	EARTH PLANET SCI LETT	COLIN, C; COLIN, C; TURPIN, L; TURPIN, L; BERTRAUX, J; BERTRAUX, J; DESPRAIRIES, A; DESPRAIRIES, A; KISSEL, C; KISSEL, C	MD1977	10.2083	95.0758	-1	0		0.0118	TIMS-ID	SEDIMENTARY	UNKNOWN	UNKNOWN	SILICICLASTIC																						24
CON0012-344/25		SEDDB	10.1016/S0012-821X(99)00184-3	EROSIONAL HISTORY OF THE HIMALAYAN AND BURMAN RANGES DURING THE LAST TWO GLACIAL-INTERGLACIAL CYCLES	EARTH PLANET SCI LETT	COLIN, C; COLIN, C; TURPIN, L; TURPIN, L; BERTRAUX, J; BERTRAUX, J; DESPRAIRIES, A; DESPRAIRIES, A; KISSEL, C; KISSEL, C	RC12	12.7667	96.0903	-1	0		0.0118	TIMS	SEDIMENTARY	UNKNOWN	UNKNOWN	SILICICLASTIC
CON0012-344/25		SEDDB	10.1016/S0012-821X(99)00184-3	EROSIONAL HISTORY OF THE HIMALAYAN AND BURMAN RANGES DURING THE LAST TWO GLACIAL-INTERGLACIAL CYCLES	EARTH PLANET SCI LETT	COLIN, C; COLIN, C; TURPIN, L; TURPIN, L; BERTRAUX, J; BERTRAUX, J; DESPRAIRIES, A; DESPRAIRIES, A; KISSEL, C; KISSEL, C	RC12	12.7667	96.0903	-1	0		0.0118	TIMS-ID	SEDIMENTARY	UNKNOWN	UNKNOWN	SILICICLASTIC																						29.1
VEM0029-020/10		SEDDB	10.1016/S0012-821X(99)00184-3	EROSIONAL HISTORY OF THE HIMALAYAN AND BURMAN RANGES DURING THE LAST TWO GLACIAL-INTERGLACIAL CYCLES	EARTH PLANET SCI LETT	COLIN, C; COLIN, C; TURPIN, L; TURPIN, L; BERTRAUX, J; BERTRAUX, J; DESPRAIRIES, A; DESPRAIRIES, A; KISSEL, C; KISSEL, C	VM29	11.53	81.7	-1	0		0.0118	TIMS	SEDIMENTARY	UNKNOWN	UNKNOWN	SILICICLASTIC
VEM0029-020/10		SEDDB	10.1016/S0012-821X(99)00184-3	EROSIONAL HISTORY OF THE HIMALAYAN AND BURMAN RANGES DURING THE LAST TWO GLACIAL-INTERGLACIAL CYCLES	EARTH PLANET SCI LETT	COLIN, C; COLIN, C; TURPIN, L; TURPIN, L; BERTRAUX, J; BERTRAUX, J; DESPRAIRIES, A; DESPRAIRIES, A; KISSEL, C; KISSEL, C	VM29	11.53	81.7	-1	0		0.0118	TIMS-ID	SEDIMENTARY	UNKNOWN	UNKNOWN	SILICICLASTIC																						25.6
DUF0077-169/158		SEDDB	10.1016/S0012-821X(99)00184-3	EROSIONAL HISTORY OF THE HIMALAYAN AND BURMAN RANGES DURING THE LAST TWO GLACIAL-INTERGLACIAL CYCLES	EARTH PLANET SCI LETT	COLIN, C; COLIN, C; TURPIN, L; TURPIN, L; BERTRAUX, J; BERTRAUX, J; DESPRAIRIES, A; DESPRAIRIES, A; KISSEL, C; KISSEL, C	MD1977	10.2083	95.0758	-1	0.0118		1.806	TIMS	SEDIMENTARY	UNKNOWN	UNKNOWN	SILICICLASTIC
DUF0077-169/158		SEDDB	10.1016/S0012-821X(99)00184-3	EROSIONAL HISTORY OF THE HIMALAYAN AND BURMAN RANGES DURING THE LAST TWO GLACIAL-INTERGLACIAL CYCLES	EARTH PLANET SCI LETT	COLIN, C; COLIN, C; TURPIN, L; TURPIN, L; BERTRAUX, J; BERTRAUX, J; DESPRAIRIES, A; DESPRAIRIES, A; KISSEL, C; KISSEL, C	MD1977	10.2083	95.0758	-1	0.0118		1.806	TIMS-ID	SEDIMENTARY	UNKNOWN	UNKNOWN	SILICICLASTIC																						23.5
CON0012-341/60		SEDDB	10.1016/S0012-821X(99)00184-3	EROSIONAL HISTORY OF THE HIMALAYAN AND BURMAN RANGES DURING THE LAST TWO GLACIAL-INTERGLACIAL CYCLES	EARTH PLANET SCI LETT	COLIN, C; COLIN, C; TURPIN, L; TURPIN, L; BERTRAUX, J; BERTRAUX, J; DESPRAIRIES, A; DESPRAIRIES, A; KISSEL, C; KISSEL, C	RC12	13.05	89.6078	-1	0.0118		1.806	TIMS	SEDIMENTARY	UNKNOWN	UNKNOWN	SILICICLASTIC
CON0012-341/60		SEDDB	10.1016/S0012-821X(99)00184-3	EROSIONAL HISTORY OF THE HIMALAYAN AND BURMAN RANGES DURING THE LAST TWO GLACIAL-INTERGLACIAL CYCLES	EARTH PLANET SCI LETT	COLIN, C; COLIN, C; TURPIN, L; TURPIN, L; BERTRAUX, J; BERTRAUX, J; DESPRAIRIES, A; DESPRAIRIES, A; KISSEL, C; KISSEL, C	RC12	13.05	89.6078	-1	0.0118		1.806	TIMS-ID	SEDIMENTARY	UNKNOWN	UNKNOWN	SILICICLASTIC																						27.8
VEM0029-019/8		SEDDB	10.1016/S0012-821X(99)00184-3	EROSIONAL HISTORY OF THE HIMALAYAN AND BURMAN RANGES DURING THE LAST TWO GLACIAL-INTERGLACIAL CYCLES	EARTH PLANET SCI LETT	COLIN, C; COLIN, C; TURPIN, L; TURPIN, L; BERTRAUX, J; BERTRAUX, J; DESPRAIRIES, A; DESPRAIRIES, A; KISSEL, C; KISSEL, C	VM29	14.7	83.58	-1	0		0.0118	TIMS	SEDIMENTARY	UNKNOWN	UNKNOWN	SILICICLASTIC
VEM0029-019/8		SEDDB	10.1016/S0012-821X(99)00184-3	EROSIONAL HISTORY OF THE HIMALAYAN AND BURMAN RANGES DURING THE LAST TWO GLACIAL-INTERGLACIAL CYCLES	EARTH PLANET SCI LETT	COLIN, C; COLIN, C; TURPIN, L; TURPIN, L; BERTRAUX, J; BERTRAUX, J; DESPRAIRIES, A; DESPRAIRIES, A; KISSEL, C; KISSEL, C	VM29	14.7	83.58	-1	0		0.0118	TIMS-ID	SEDIMENTARY	UNKNOWN	UNKNOWN	SILICICLASTIC																						21
DUF0077-180/84		SEDDB	10.1016/S0012-821X(99)00184-3	EROSIONAL HISTORY OF THE HIMALAYAN AND BURMAN RANGES DURING THE LAST TWO GLACIAL-INTERGLACIAL CYCLES	EARTH PLANET SCI LETT	COLIN, C; COLIN, C; TURPIN, L; TURPIN, L; BERTRAUX, J; BERTRAUX, J; DESPRAIRIES, A; DESPRAIRIES, A; KISSEL, C; KISSEL, C	MD1977	18.4717	89.8819	-1	0		0.0118	TIMS	SEDIMENTARY	UNKNOWN	UNKNOWN	SILICICLASTIC
DUF0077-180/84		SEDDB	10.1016/S0012-821X(99)00184-3	EROSIONAL HISTORY OF THE HIMALAYAN AND BURMAN RANGES DURING THE LAST TWO GLACIAL-INTERGLACIAL CYCLES	EARTH PLANET SCI LETT	COLIN, C; COLIN, C; TURPIN, L; TURPIN, L; BERTRAUX, J; BERTRAUX, J; DESPRAIRIES, A; DESPRAIRIES, A; KISSEL, C; KISSEL, C	MD1977	18.4717	89.8819	-1	0		0.0118	TIMS-ID	SEDIMENTARY	UNKNOWN	UNKNOWN	SILICICLASTIC																						30.3
DUF0077-180/200		SEDDB	10.1016/S0012-821X(99)00184-3	EROSIONAL HISTORY OF THE HIMALAYAN AND BURMAN RANGES DURING THE LAST TWO GLACIAL-INTERGLACIAL CYCLES	EARTH PLANET SCI LETT	COLIN, C; COLIN, C; TURPIN, L; TURPIN, L; BERTRAUX, J; BERTRAUX, J; DESPRAIRIES, A; DESPRAIRIES, A; KISSEL, C; KISSEL, C	MD1977	18.4717	89.8819	-1	0.0118		1.806	TIMS	SEDIMENTARY	UNKNOWN	UNKNOWN	SILICICLASTIC
DUF0077-180/200		SEDDB	10.1016/S0012-821X(99)00184-3	EROSIONAL HISTORY OF THE HIMALAYAN AND BURMAN RANGES DURING THE LAST TWO GLACIAL-INTERGLACIAL CYCLES	EARTH PLANET SCI LETT	COLIN, C; COLIN, C; TURPIN, L; TURPIN, L; BERTRAUX, J; BERTRAUX, J; DESPRAIRIES, A; DESPRAIRIES, A; KISSEL, C; KISSEL, C	MD1977	18.4717	89.8819	-1	0.0118		1.806	TIMS-ID	SEDIMENTARY	UNKNOWN	UNKNOWN	SILICICLASTIC																						34
CON0012-341/12		SEDDB	10.1016/S0012-821X(99)00184-3	EROSIONAL HISTORY OF THE HIMALAYAN AND BURMAN RANGES DURING THE LAST TWO GLACIAL-INTERGLACIAL CYCLES	EARTH PLANET SCI LETT	COLIN, C; COLIN, C; TURPIN, L; TURPIN, L; BERTRAUX, J; BERTRAUX, J; DESPRAIRIES, A; DESPRAIRIES, A; KISSEL, C; KISSEL, C	RC12	13.05	89.6078	-1	0		0.0118	TIMS	SEDIMENTARY	UNKNOWN	UNKNOWN	SILICICLASTIC
CON0012-341/12		SEDDB	10.1016/S0012-821X(99)00184-3	EROSIONAL HISTORY OF THE HIMALAYAN AND BURMAN RANGES DURING THE LAST TWO GLACIAL-INTERGLACIAL CYCLES	EARTH PLANET SCI LETT	COLIN, C; COLIN, C; TURPIN, L; TURPIN, L; BERTRAUX, J; BERTRAUX, J; DESPRAIRIES, A; DESPRAIRIES, A; KISSEL, C; KISSEL, C	RC12	13.05	89.6078	-1	0		0.0118	TIMS-ID	SEDIMENTARY	UNKNOWN	UNKNOWN	SILICICLASTIC																						21.4
VEM0029-018/3		SEDDB	10.1016/S0012-821X(99)00184-3	EROSIONAL HISTORY OF THE HIMALAYAN AND BURMAN RANGES DURING THE LAST TWO GLACIAL-INTERGLACIAL CYCLES	EARTH PLANET SCI LETT	COLIN, C; COLIN, C; TURPIN, L; TURPIN, L; BERTRAUX, J; BERTRAUX, J; DESPRAIRIES, A; DESPRAIRIES, A; KISSEL, C; KISSEL, C	VM29	16.6333	85.4225	-1	0		0.0118	TIMS	SEDIMENTARY	UNKNOWN	UNKNOWN	SILICICLASTIC
VEM0029-018/3		SEDDB	10.1016/S0012-821X(99)00184-3	EROSIONAL HISTORY OF THE HIMALAYAN AND BURMAN RANGES DURING THE LAST TWO GLACIAL-INTERGLACIAL CYCLES	EARTH PLANET SCI LETT	COLIN, C; COLIN, C; TURPIN, L; TURPIN, L; BERTRAUX, J; BERTRAUX, J; DESPRAIRIES, A; DESPRAIRIES, A; KISSEL, C; KISSEL, C	VM29	16.6333	85.4225	-1	0		0.0118	TIMS-ID	SEDIMENTARY	UNKNOWN	UNKNOWN	SILICICLASTIC																						27.5
POLAN10-5-2319-1/203		SEDDB	10.1016/S0016-7037(00)00476-2	PROVENANCE AND TRANSPORT OF TERRIGENOUS SEDIMENT IN THE SOUTH ATLANTIC OCEAN AND THEIR RELATIONS TO GLACIAL AND INTERGLACIAL CYCLES: Nd AND Sr ISOTOPIC EVIDENCE	GEOCHIM COSMOCHIM ACTA	WALTER, H; HEGNER, E; DIEKMANN, B; KUHN, G; RUTGERS VAN DER LOEFF, M	ANTX-5	-59.7883	-42.6986	-1	0		1.806	UNKNOWN	SEDIMENTARY	UNKNOWN	UNKNOWN	SILICICLASTIC																						22.14	4.54
POLAN10-5-2319-1/203		SEDDB	10.1016/S0016-7037(00)00476-2	PROVENANCE AND TRANSPORT OF TERRIGENOUS SEDIMENT IN THE SOUTH ATLANTIC OCEAN AND THEIR RELATIONS TO GLACIAL AND INTERGLACIAL CYCLES: Nd AND Sr ISOTOPIC EVIDENCE	GEOCHIM COSMOCHIM ACTA	WALTER, H; HEGNER, E; DIEKMANN, B; KUHN, G; RUTGERS VAN DER LOEFF, M	ANTX-5	-59.7883	-42.6986	-1	0		1.806	MS	SEDIMENTARY	UNKNOWN	UNKNOWN	SILICICLASTIC
POLAN11-2-2495-3/344		SEDDB	10.1016/S0016-7037(00)00476-2	PROVENANCE AND TRANSPORT OF TERRIGENOUS SEDIMENT IN THE SOUTH ATLANTIC OCEAN AND THEIR RELATIONS TO GLACIAL AND INTERGLACIAL CYCLES: Nd AND Sr ISOTOPIC EVIDENCE	GEOCHIM COSMOCHIM ACTA	WALTER, H; HEGNER, E; DIEKMANN, B; KUHN, G; RUTGERS VAN DER LOEFF, M	ANTXI-2	-41.2867	-14.5117	-1	0		1.806	UNKNOWN	SEDIMENTARY	UNKNOWN	UNKNOWN	SILICICLASTIC																						5.51	1.15
POLAN11-2-2495-3/344		SEDDB	10.1016/S0016-7037(00)00476-2	PROVENANCE AND TRANSPORT OF TERRIGENOUS SEDIMENT IN THE SOUTH ATLANTIC OCEAN AND THEIR RELATIONS TO GLACIAL AND INTERGLACIAL CYCLES: Nd AND Sr ISOTOPIC EVIDENCE	GEOCHIM COSMOCHIM ACTA	WALTER, H; HEGNER, E; DIEKMANN, B; KUHN, G; RUTGERS VAN DER LOEFF, M	ANTXI-2	-41.2867	-14.5117	-1	0		1.806	MS	SEDIMENTARY	UNKNOWN	UNKNOWN	SILICICLASTIC
POLAN10-5-2319-1/293		SEDDB	10.1016/S0016-7037(00)00476-2	PROVENANCE AND TRANSPORT OF TERRIGENOUS SEDIMENT IN THE SOUTH ATLANTIC OCEAN AND THEIR RELATIONS TO GLACIAL AND INTERGLACIAL CYCLES: Nd AND Sr ISOTOPIC EVIDENCE	GEOCHIM COSMOCHIM ACTA	WALTER, H; HEGNER, E; DIEKMANN, B; KUHN, G; RUTGERS VAN DER LOEFF, M	ANTX-5	-59.7883	-42.6986	-1	0		1.806	UNKNOWN	SEDIMENTARY	UNKNOWN	UNKNOWN	SILICICLASTIC																						21.74	4.62
POLAN10-5-2319-1/293		SEDDB	10.1016/S0016-7037(00)00476-2	PROVENANCE AND TRANSPORT OF TERRIGENOUS SEDIMENT IN THE SOUTH ATLANTIC OCEAN AND THEIR RELATIONS TO GLACIAL AND INTERGLACIAL CYCLES: Nd AND Sr ISOTOPIC EVIDENCE	GEOCHIM COSMOCHIM ACTA	WALTER, H; HEGNER, E; DIEKMANN, B; KUHN, G; RUTGERS VAN DER LOEFF, M	ANTX-5	-59.7883	-42.6986	-1	0		1.806	MS	SEDIMENTARY	UNKNOWN	UNKNOWN	SILICICLASTIC
POLAN06-2-1563-1/1		SEDDB	10.1016/S0016-7037(00)00476-2	PROVENANCE AND TRANSPORT OF TERRIGENOUS SEDIMENT IN THE SOUTH ATLANTIC OCEAN AND THEIR RELATIONS TO GLACIAL AND INTERGLACIAL CYCLES: Nd AND Sr ISOTOPIC EVIDENCE	GEOCHIM COSMOCHIM ACTA	WALTER, H; HEGNER, E; DIEKMANN, B; KUHN, G; RUTGERS VAN DER LOEFF, M	ANTVI-2	-64.7817	-68.4647	-1	0		1.806	UNKNOWN	SEDIMENTARY	UNKNOWN	UNKNOWN	SILICICLASTIC																						14.1	3.13
POLAN06-2-1563-1/1		SEDDB	10.1016/S0016-7037(00)00476-2	PROVENANCE AND TRANSPORT OF TERRIGENOUS SEDIMENT IN THE SOUTH ATLANTIC OCEAN AND THEIR RELATIONS TO GLACIAL AND INTERGLACIAL CYCLES: Nd AND Sr ISOTOPIC EVIDENCE	GEOCHIM COSMOCHIM ACTA	WALTER, H; HEGNER, E; DIEKMANN, B; KUHN, G; RUTGERS VAN DER LOEFF, M	ANTVI-2	-64.7817	-68.4647	-1	0		1.806	MS	SEDIMENTARY	UNKNOWN	UNKNOWN	SILICICLASTIC
POLAN01-2-1016-1/0.3		SEDDB	10.1016/S0016-7037(00)00476-2	PROVENANCE AND TRANSPORT OF TERRIGENOUS SEDIMENT IN THE SOUTH ATLANTIC OCEAN AND THEIR RELATIONS TO GLACIAL AND INTERGLACIAL CYCLES: Nd AND Sr ISOTOPIC EVIDENCE	GEOCHIM COSMOCHIM ACTA	WALTER, H; HEGNER, E; DIEKMANN, B; KUHN, G; RUTGERS VAN DER LOEFF, M	ANTI-2	-77.255	-40.8567	-1	0		1.806	UNKNOWN	SEDIMENTARY	UNKNOWN	UNKNOWN	SILICICLASTIC																						18.56	3.67
POLAN01-2-1016-1/0.3		SEDDB	10.1016/S0016-7037(00)00476-2	PROVENANCE AND TRANSPORT OF TERRIGENOUS SEDIMENT IN THE SOUTH ATLANTIC OCEAN AND THEIR RELATIONS TO GLACIAL AND INTERGLACIAL CYCLES: Nd AND Sr ISOTOPIC EVIDENCE	GEOCHIM COSMOCHIM ACTA	WALTER, H; HEGNER, E; DIEKMANN, B; KUHN, G; RUTGERS VAN DER LOEFF, M	ANTI-2	-77.255	-40.8567	-1	0		1.806	MS	SEDIMENTARY	UNKNOWN	UNKNOWN	SILICICLASTIC
POLAN12-4-2697-1/1		SEDDB	10.1016/S0016-7037(00)00476-2	PROVENANCE AND TRANSPORT OF TERRIGENOUS SEDIMENT IN THE SOUTH ATLANTIC OCEAN AND THEIR RELATIONS TO GLACIAL AND INTERGLACIAL CYCLES: Nd AND Sr ISOTOPIC EVIDENCE	GEOCHIM COSMOCHIM ACTA	WALTER, H; HEGNER, E; DIEKMANN, B; KUHN, G; RUTGERS VAN DER LOEFF, M	ANTXII-4	-62.9967	-89.4933	-1	0		1.806	UNKNOWN	SEDIMENTARY	UNKNOWN	UNKNOWN	SILICICLASTIC																						18.09	3.77
POLAN12-4-2697-1/1		SEDDB	10.1016/S0016-7037(00)00476-2	PROVENANCE AND TRANSPORT OF TERRIGENOUS SEDIMENT IN THE SOUTH ATLANTIC OCEAN AND THEIR RELATIONS TO GLACIAL AND INTERGLACIAL CYCLES: Nd AND Sr ISOTOPIC EVIDENCE	GEOCHIM COSMOCHIM ACTA	WALTER, H; HEGNER, E; DIEKMANN, B; KUHN, G; RUTGERS VAN DER LOEFF, M	ANTXII-4	-62.9967	-89.4933	-1	0		1.806	MS	SEDIMENTARY	UNKNOWN	UNKNOWN	SILICICLASTIC
POLAN12-4-2684-1/1		SEDDB	10.1016/S0016-7037(00)00476-2	PROVENANCE AND TRANSPORT OF TERRIGENOUS SEDIMENT IN THE SOUTH ATLANTIC OCEAN AND THEIR RELATIONS TO GLACIAL AND INTERGLACIAL CYCLES: Nd AND Sr ISOTOPIC EVIDENCE	GEOCHIM COSMOCHIM ACTA	WALTER, H; HEGNER, E; DIEKMANN, B; KUHN, G; RUTGERS VAN DER LOEFF, M	ANTXII-4	-69.4167	-95.0233	-1	0		1.806	UNKNOWN	SEDIMENTARY	UNKNOWN	UNKNOWN	SILICICLASTIC																						24.01	4.93
POLAN12-4-2684-1/1		SEDDB	10.1016/S0016-7037(00)00476-2	PROVENANCE AND TRANSPORT OF TERRIGENOUS SEDIMENT IN THE SOUTH ATLANTIC OCEAN AND THEIR RELATIONS TO GLACIAL AND INTERGLACIAL CYCLES: Nd AND Sr ISOTOPIC EVIDENCE	GEOCHIM COSMOCHIM ACTA	WALTER, H; HEGNER, E; DIEKMANN, B; KUHN, G; RUTGERS VAN DER LOEFF, M	ANTXII-4	-69.4167	-95.0233	-1	0		1.806	MS	SEDIMENTARY	UNKNOWN	UNKNOWN	SILICICLASTIC
POLAN06-2-1537-2/1		SEDDB	10.1016/S0016-7037(00)00476-2	PROVENANCE AND TRANSPORT OF TERRIGENOUS SEDIMENT IN THE SOUTH ATLANTIC OCEAN AND THEIR RELATIONS TO GLACIAL AND INTERGLACIAL CYCLES: Nd AND Sr ISOTOPIC EVIDENCE	GEOCHIM COSMOCHIM ACTA	WALTER, H; HEGNER, E; DIEKMANN, B; KUHN, G; RUTGERS VAN DER LOEFF, M	ANTVI-2	-61.9833	-55.8822	-1	0		1.806	UNKNOWN	SEDIMENTARY	UNKNOWN	UNKNOWN	SILICICLASTIC																						11.27	2.57
POLAN06-2-1537-2/1		SEDDB	10.1016/S0016-7037(00)00476-2	PROVENANCE AND TRANSPORT OF TERRIGENOUS SEDIMENT IN THE SOUTH ATLANTIC OCEAN AND THEIR RELATIONS TO GLACIAL AND INTERGLACIAL CYCLES: Nd AND Sr ISOTOPIC EVIDENCE	GEOCHIM COSMOCHIM ACTA	WALTER, H; HEGNER, E; DIEKMANN, B; KUHN, G; RUTGERS VAN DER LOEFF, M	ANTVI-2	-61.9833	-55.8822	-1	0		1.806	MS	SEDIMENTARY	UNKNOWN	UNKNOWN	SILICICLASTIC
POLAN11-2-2515-3/15		SEDDB	10.1016/S0016-7037(00)00476-2	PROVENANCE AND TRANSPORT OF TERRIGENOUS SEDIMENT IN THE SOUTH ATLANTIC OCEAN AND THEIR RELATIONS TO GLACIAL AND INTERGLACIAL CYCLES: Nd AND Sr ISOTOPIC EVIDENCE	GEOCHIM COSMOCHIM ACTA	WALTER, H; HEGNER, E; DIEKMANN, B; KUHN, G; RUTGERS VAN DER LOEFF, M	ANTXI-2	-53.545	-45.3042	-1	0		1.806	UNKNOWN	SEDIMENTARY	UNKNOWN	UNKNOWN	SILICICLASTIC																						16.16	3.41
POLAN11-2-2515-3/15		SEDDB	10.1016/S0016-7037(00)00476-2	PROVENANCE AND TRANSPORT OF TERRIGENOUS SEDIMENT IN THE SOUTH ATLANTIC OCEAN AND THEIR RELATIONS TO GLACIAL AND INTERGLACIAL CYCLES: Nd AND Sr ISOTOPIC EVIDENCE	GEOCHIM COSMOCHIM ACTA	WALTER, H; HEGNER, E; DIEKMANN, B; KUHN, G; RUTGERS VAN DER LOEFF, M	ANTXI-2	-53.545	-45.3042	-1	0		1.806	MS	SEDIMENTARY	UNKNOWN	UNKNOWN	SILICICLASTIC
POLAN11-2-2515-3/665		SEDDB	10.1016/S0016-7037(00)00476-2	PROVENANCE AND TRANSPORT OF TERRIGENOUS SEDIMENT IN THE SOUTH ATLANTIC OCEAN AND THEIR RELATIONS TO GLACIAL AND INTERGLACIAL CYCLES: Nd AND Sr ISOTOPIC EVIDENCE	GEOCHIM COSMOCHIM ACTA	WALTER, H; HEGNER, E; DIEKMANN, B; KUHN, G; RUTGERS VAN DER LOEFF, M	ANTXI-2	-53.545	-45.3042	-1	0		1.806	UNKNOWN	SEDIMENTARY	UNKNOWN	UNKNOWN	SILICICLASTIC																						20.28	4.25
POLAN11-2-2515-3/665		SEDDB	10.1016/S0016-7037(00)00476-2	PROVENANCE AND TRANSPORT OF TERRIGENOUS SEDIMENT IN THE SOUTH ATLANTIC OCEAN AND THEIR RELATIONS TO GLACIAL AND INTERGLACIAL CYCLES: Nd AND Sr ISOTOPIC EVIDENCE	GEOCHIM COSMOCHIM ACTA	WALTER, H; HEGNER, E; DIEKMANN, B; KUHN, G; RUTGERS VAN DER LOEFF, M	ANTXI-2	-53.545	-45.3042	-1	0		1.806	MS	SEDIMENTARY	UNKNOWN	UNKNOWN	SILICICLASTIC
POLAN11-2-2515-3/855		SEDDB	10.1016/S0016-7037(00)00476-2	PROVENANCE AND TRANSPORT OF TERRIGENOUS SEDIMENT IN THE SOUTH ATLANTIC OCEAN AND THEIR RELATIONS TO GLACIAL AND INTERGLACIAL CYCLES: Nd AND Sr ISOTOPIC EVIDENCE	GEOCHIM COSMOCHIM ACTA	WALTER, H; HEGNER, E; DIEKMANN, B; KUHN, G; RUTGERS VAN DER LOEFF, M	ANTXI-2	-53.545	-45.3042	-1	0		1.806	UNKNOWN	SEDIMENTARY	UNKNOWN	UNKNOWN	SILICICLASTIC																						21.63	4.49
POLAN11-2-2515-3/855		SEDDB	10.1016/S0016-7037(00)00476-2	PROVENANCE AND TRANSPORT OF TERRIGENOUS SEDIMENT IN THE SOUTH ATLANTIC OCEAN AND THEIR RELATIONS TO GLACIAL AND INTERGLACIAL CYCLES: Nd AND Sr ISOTOPIC EVIDENCE	GEOCHIM COSMOCHIM ACTA	WALTER, H; HEGNER, E; DIEKMANN, B; KUHN, G; RUTGERS VAN DER LOEFF, M	ANTXI-2	-53.545	-45.3042	-1	0		1.806	MS	SEDIMENTARY	UNKNOWN	UNKNOWN	SILICICLASTIC
POLAN11-2-2515-3/1225		SEDDB	10.1016/S0016-7037(00)00476-2	PROVENANCE AND TRANSPORT OF TERRIGENOUS SEDIMENT IN THE SOUTH ATLANTIC OCEAN AND THEIR RELATIONS TO GLACIAL AND INTERGLACIAL CYCLES: Nd AND Sr ISOTOPIC EVIDENCE	GEOCHIM COSMOCHIM ACTA	WALTER, H; HEGNER, E; DIEKMANN, B; KUHN, G; RUTGERS VAN DER LOEFF, M	ANTXI-2	-53.545	-45.3042	-1	0		1.806	UNKNOWN	SEDIMENTARY	UNKNOWN	UNKNOWN	SILICICLASTIC																						19.27	4.16
POLAN11-2-2515-3/1225		SEDDB	10.1016/S0016-7037(00)00476-2	PROVENANCE AND TRANSPORT OF TERRIGENOUS SEDIMENT IN THE SOUTH ATLANTIC OCEAN AND THEIR RELATIONS TO GLACIAL AND INTERGLACIAL CYCLES: Nd AND Sr ISOTOPIC EVIDENCE	GEOCHIM COSMOCHIM ACTA	WALTER, H; HEGNER, E; DIEKMANN, B; KUHN, G; RUTGERS VAN DER LOEFF, M	ANTXI-2	-53.545	-45.3042	-1	0		1.806	MS	SEDIMENTARY	UNKNOWN	UNKNOWN	SILICICLASTIC
POLAN10-5-2319-1/333		SEDDB	10.1016/S0016-7037(00)00476-2	PROVENANCE AND TRANSPORT OF TERRIGENOUS SEDIMENT IN THE SOUTH ATLANTIC OCEAN AND THEIR RELATIONS TO GLACIAL AND INTERGLACIAL CYCLES: Nd AND Sr ISOTOPIC EVIDENCE	GEOCHIM COSMOCHIM ACTA	WALTER, H; HEGNER, E; DIEKMANN, B; KUHN, G; RUTGERS VAN DER LOEFF, M	ANTX-5	-59.7883	-42.6986	-1	0		1.806	UNKNOWN	SEDIMENTARY	UNKNOWN	UNKNOWN	SILICICLASTIC																						21.72	4.51
POLAN10-5-2319-1/333		SEDDB	10.1016/S0016-7037(00)00476-2	PROVENANCE AND TRANSPORT OF TERRIGENOUS SEDIMENT IN THE SOUTH ATLANTIC OCEAN AND THEIR RELATIONS TO GLACIAL AND INTERGLACIAL CYCLES: Nd AND Sr ISOTOPIC EVIDENCE	GEOCHIM COSMOCHIM ACTA	WALTER, H; HEGNER, E; DIEKMANN, B; KUHN, G; RUTGERS VAN DER LOEFF, M	ANTX-5	-59.7883	-42.6986	-1	0		1.806	MS	SEDIMENTARY	UNKNOWN	UNKNOWN	SILICICLASTIC
POLAN12-4-2659-2/1		SEDDB	10.1016/S0016-7037(00)00476-2	PROVENANCE AND TRANSPORT OF TERRIGENOUS SEDIMENT IN THE SOUTH ATLANTIC OCEAN AND THEIR RELATIONS TO GLACIAL AND INTERGLACIAL CYCLES: Nd AND Sr ISOTOPIC EVIDENCE	GEOCHIM COSMOCHIM ACTA	WALTER, H; HEGNER, E; DIEKMANN, B; KUHN, G; RUTGERS VAN DER LOEFF, M	ANTXII-4	-44.15	-85.7131	-1	0		1.806	UNKNOWN	SEDIMENTARY	UNKNOWN	UNKNOWN	SILICICLASTIC																						20.91	4.54
POLAN12-4-2659-2/1		SEDDB	10.1016/S0016-7037(00)00476-2	PROVENANCE AND TRANSPORT OF TERRIGENOUS SEDIMENT IN THE SOUTH ATLANTIC OCEAN AND THEIR RELATIONS TO GLACIAL AND INTERGLACIAL CYCLES: Nd AND Sr ISOTOPIC EVIDENCE	GEOCHIM COSMOCHIM ACTA	WALTER, H; HEGNER, E; DIEKMANN, B; KUHN, G; RUTGERS VAN DER LOEFF, M	ANTXII-4	-44.15	-85.7131	-1	0		1.806	MS	SEDIMENTARY	UNKNOWN	UNKNOWN	SILICICLASTIC
POLAN11-2-2515-3/363		SEDDB	10.1016/S0016-7037(00)00476-2	PROVENANCE AND TRANSPORT OF TERRIGENOUS SEDIMENT IN THE SOUTH ATLANTIC OCEAN AND THEIR RELATIONS TO GLACIAL AND INTERGLACIAL CYCLES: Nd AND Sr ISOTOPIC EVIDENCE	GEOCHIM COSMOCHIM ACTA	WALTER, H; HEGNER, E; DIEKMANN, B; KUHN, G; RUTGERS VAN DER LOEFF, M	ANTXI-2	-53.545	-45.3042	-1	0		1.806	UNKNOWN	SEDIMENTARY	UNKNOWN	UNKNOWN	SILICICLASTIC																						19.26	4.01
POLAN11-2-2515-3/363		SEDDB	10.1016/S0016-7037(00)00476-2	PROVENANCE AND TRANSPORT OF TERRIGENOUS SEDIMENT IN THE SOUTH ATLANTIC OCEAN AND THEIR RELATIONS TO GLACIAL AND INTERGLACIAL CYCLES: Nd AND Sr ISOTOPIC EVIDENCE	GEOCHIM COSMOCHIM ACTA	WALTER, H; HEGNER, E; DIEKMANN, B; KUHN, G; RUTGERS VAN DER LOEFF, M	ANTXI-2	-53.545	-45.3042	-1	0		1.806	MS	SEDIMENTARY	UNKNOWN	UNKNOWN	SILICICLASTIC
POLAN10-5-2319-1/43		SEDDB	10.1016/S0016-7037(00)00476-2	PROVENANCE AND TRANSPORT OF TERRIGENOUS SEDIMENT IN THE SOUTH ATLANTIC OCEAN AND THEIR RELATIONS TO GLACIAL AND INTERGLACIAL CYCLES: Nd AND Sr ISOTOPIC EVIDENCE	GEOCHIM COSMOCHIM ACTA	WALTER, H; HEGNER, E; DIEKMANN, B; KUHN, G; RUTGERS VAN DER LOEFF, M	ANTX-5	-59.7883	-42.6986	-1	0		1.806	UNKNOWN	SEDIMENTARY	UNKNOWN	UNKNOWN	SILICICLASTIC																						17.9	3.67
POLAN10-5-2319-1/43		SEDDB	10.1016/S0016-7037(00)00476-2	PROVENANCE AND TRANSPORT OF TERRIGENOUS SEDIMENT IN THE SOUTH ATLANTIC OCEAN AND THEIR RELATIONS TO GLACIAL AND INTERGLACIAL CYCLES: Nd AND Sr ISOTOPIC EVIDENCE	GEOCHIM COSMOCHIM ACTA	WALTER, H; HEGNER, E; DIEKMANN, B; KUHN, G; RUTGERS VAN DER LOEFF, M	ANTX-5	-59.7883	-42.6986	-1	0		1.806	MS	SEDIMENTARY	UNKNOWN	UNKNOWN	SILICICLASTIC
POLAN10-5-2319-1/243		SEDDB	10.1016/S0016-7037(00)00476-2	PROVENANCE AND TRANSPORT OF TERRIGENOUS SEDIMENT IN THE SOUTH ATLANTIC OCEAN AND THEIR RELATIONS TO GLACIAL AND INTERGLACIAL CYCLES: Nd AND Sr ISOTOPIC EVIDENCE	GEOCHIM COSMOCHIM ACTA	WALTER, H; HEGNER, E; DIEKMANN, B; KUHN, G; RUTGERS VAN DER LOEFF, M	ANTX-5	-59.7883	-42.6986	-1	0		1.806	UNKNOWN	SEDIMENTARY	UNKNOWN	UNKNOWN	SILICICLASTIC																						21.93	4.57
POLAN10-5-2319-1/243		SEDDB	10.1016/S0016-7037(00)00476-2	PROVENANCE AND TRANSPORT OF TERRIGENOUS SEDIMENT IN THE SOUTH ATLANTIC OCEAN AND THEIR RELATIONS TO GLACIAL AND INTERGLACIAL CYCLES: Nd AND Sr ISOTOPIC EVIDENCE	GEOCHIM COSMOCHIM ACTA	WALTER, H; HEGNER, E; DIEKMANN, B; KUHN, G; RUTGERS VAN DER LOEFF, M	ANTX-5	-59.7883	-42.6986	-1	0		1.806	MS	SEDIMENTARY	UNKNOWN	UNKNOWN	SILICICLASTIC
POLAN10-5-2319-1/423		SEDDB	10.1016/S0016-7037(00)00476-2	PROVENANCE AND TRANSPORT OF TERRIGENOUS SEDIMENT IN THE SOUTH ATLANTIC OCEAN AND THEIR RELATIONS TO GLACIAL AND INTERGLACIAL CYCLES: Nd AND Sr ISOTOPIC EVIDENCE	GEOCHIM COSMOCHIM ACTA	WALTER, H; HEGNER, E; DIEKMANN, B; KUHN, G; RUTGERS VAN DER LOEFF, M	ANTX-5	-59.7883	-42.6986	-1	0		1.806	UNKNOWN	SEDIMENTARY	UNKNOWN	UNKNOWN	SILICICLASTIC																						23.23	4.77
POLAN10-5-2319-1/423		SEDDB	10.1016/S0016-7037(00)00476-2	PROVENANCE AND TRANSPORT OF TERRIGENOUS SEDIMENT IN THE SOUTH ATLANTIC OCEAN AND THEIR RELATIONS TO GLACIAL AND INTERGLACIAL CYCLES: Nd AND Sr ISOTOPIC EVIDENCE	GEOCHIM COSMOCHIM ACTA	WALTER, H; HEGNER, E; DIEKMANN, B; KUHN, G; RUTGERS VAN DER LOEFF, M	ANTX-5	-59.7883	-42.6986	-1	0		1.806	MS	SEDIMENTARY	UNKNOWN	UNKNOWN	SILICICLASTIC
POLAN10-5-2319-1/623		SEDDB	10.1016/S0016-7037(00)00476-2	PROVENANCE AND TRANSPORT OF TERRIGENOUS SEDIMENT IN THE SOUTH ATLANTIC OCEAN AND THEIR RELATIONS TO GLACIAL AND INTERGLACIAL CYCLES: Nd AND Sr ISOTOPIC EVIDENCE	GEOCHIM COSMOCHIM ACTA	WALTER, H; HEGNER, E; DIEKMANN, B; KUHN, G; RUTGERS VAN DER LOEFF, M	ANTX-5	-59.7883	-42.6986	-1	0		1.806	UNKNOWN	SEDIMENTARY	UNKNOWN	UNKNOWN	SILICICLASTIC																						22.86	4.75
POLAN10-5-2319-1/623		SEDDB	10.1016/S0016-7037(00)00476-2	PROVENANCE AND TRANSPORT OF TERRIGENOUS SEDIMENT IN THE SOUTH ATLANTIC OCEAN AND THEIR RELATIONS TO GLACIAL AND INTERGLACIAL CYCLES: Nd AND Sr ISOTOPIC EVIDENCE	GEOCHIM COSMOCHIM ACTA	WALTER, H; HEGNER, E; DIEKMANN, B; KUHN, G; RUTGERS VAN DER LOEFF, M	ANTX-5	-59.7883	-42.6986	-1	0		1.806	MS	SEDIMENTARY	UNKNOWN	UNKNOWN	SILICICLASTIC
POLAN12-4-2716-2/1.5		SEDDB	10.1016/S0016-7037(00)00476-2	PROVENANCE AND TRANSPORT OF TERRIGENOUS SEDIMENT IN THE SOUTH ATLANTIC OCEAN AND THEIR RELATIONS TO GLACIAL AND INTERGLACIAL CYCLES: Nd AND Sr ISOTOPIC EVIDENCE	GEOCHIM COSMOCHIM ACTA	WALTER, H; HEGNER, E; DIEKMANN, B; KUHN, G; RUTGERS VAN DER LOEFF, M	ANTXII-4	-56.02	-84.9314	-1	0		1.806	UNKNOWN	SEDIMENTARY	UNKNOWN	UNKNOWN	SILICICLASTIC																						18.7	4.02
POLAN12-4-2716-2/1.5		SEDDB	10.1016/S0016-7037(00)00476-2	PROVENANCE AND TRANSPORT OF TERRIGENOUS SEDIMENT IN THE SOUTH ATLANTIC OCEAN AND THEIR RELATIONS TO GLACIAL AND INTERGLACIAL CYCLES: Nd AND Sr ISOTOPIC EVIDENCE	GEOCHIM COSMOCHIM ACTA	WALTER, H; HEGNER, E; DIEKMANN, B; KUHN, G; RUTGERS VAN DER LOEFF, M	ANTXII-4	-56.02	-84.9314	-1	0		1.806	MS	SEDIMENTARY	UNKNOWN	UNKNOWN	SILICICLASTIC
POLAN11-2-2495-3/75		SEDDB	10.1016/S0016-7037(00)00476-2	PROVENANCE AND TRANSPORT OF TERRIGENOUS SEDIMENT IN THE SOUTH ATLANTIC OCEAN AND THEIR RELATIONS TO GLACIAL AND INTERGLACIAL CYCLES: Nd AND Sr ISOTOPIC EVIDENCE	GEOCHIM COSMOCHIM ACTA	WALTER, H; HEGNER, E; DIEKMANN, B; KUHN, G; RUTGERS VAN DER LOEFF, M	ANTXI-2	-41.2867	-14.5117	-1	0		1.806	UNKNOWN	SEDIMENTARY	UNKNOWN	UNKNOWN	SILICICLASTIC																						15.04	3.13
POLAN11-2-2495-3/75		SEDDB	10.1016/S0016-7037(00)00476-2	PROVENANCE AND TRANSPORT OF TERRIGENOUS SEDIMENT IN THE SOUTH ATLANTIC OCEAN AND THEIR RELATIONS TO GLACIAL AND INTERGLACIAL CYCLES: Nd AND Sr ISOTOPIC EVIDENCE	GEOCHIM COSMOCHIM ACTA	WALTER, H; HEGNER, E; DIEKMANN, B; KUHN, G; RUTGERS VAN DER LOEFF, M	ANTXI-2	-41.2867	-14.5117	-1	0		1.806	MS	SEDIMENTARY	UNKNOWN	UNKNOWN	SILICICLASTIC
POLAN11-2-2515-3/1135		SEDDB	10.1016/S0016-7037(00)00476-2	PROVENANCE AND TRANSPORT OF TERRIGENOUS SEDIMENT IN THE SOUTH ATLANTIC OCEAN AND THEIR RELATIONS TO GLACIAL AND INTERGLACIAL CYCLES: Nd AND Sr ISOTOPIC EVIDENCE	GEOCHIM COSMOCHIM ACTA	WALTER, H; HEGNER, E; DIEKMANN, B; KUHN, G; RUTGERS VAN DER LOEFF, M	ANTXI-2	-53.545	-45.3042	-1	0		1.806	UNKNOWN	SEDIMENTARY	UNKNOWN	UNKNOWN	SILICICLASTIC																						17.15	3.59
POLAN11-2-2515-3/1135		SEDDB	10.1016/S0016-7037(00)00476-2	PROVENANCE AND TRANSPORT OF TERRIGENOUS SEDIMENT IN THE SOUTH ATLANTIC OCEAN AND THEIR RELATIONS TO GLACIAL AND INTERGLACIAL CYCLES: Nd AND Sr ISOTOPIC EVIDENCE	GEOCHIM COSMOCHIM ACTA	WALTER, H; HEGNER, E; DIEKMANN, B; KUHN, G; RUTGERS VAN DER LOEFF, M	ANTXI-2	-53.545	-45.3042	-1	0		1.806	MS	SEDIMENTARY	UNKNOWN	UNKNOWN	SILICICLASTIC
POLAN10-5-2319-1/113		SEDDB	10.1016/S0016-7037(00)00476-2	PROVENANCE AND TRANSPORT OF TERRIGENOUS SEDIMENT IN THE SOUTH ATLANTIC OCEAN AND THEIR RELATIONS TO GLACIAL AND INTERGLACIAL CYCLES: Nd AND Sr ISOTOPIC EVIDENCE	GEOCHIM COSMOCHIM ACTA	WALTER, H; HEGNER, E; DIEKMANN, B; KUHN, G; RUTGERS VAN DER LOEFF, M	ANTX-5	-59.7883	-42.6986	-1	0		1.806	UNKNOWN	SEDIMENTARY	UNKNOWN	UNKNOWN	SILICICLASTIC																						15.69	3.12
POLAN10-5-2319-1/113		SEDDB	10.1016/S0016-7037(00)00476-2	PROVENANCE AND TRANSPORT OF TERRIGENOUS SEDIMENT IN THE SOUTH ATLANTIC OCEAN AND THEIR RELATIONS TO GLACIAL AND INTERGLACIAL CYCLES: Nd AND Sr ISOTOPIC EVIDENCE	GEOCHIM COSMOCHIM ACTA	WALTER, H; HEGNER, E; DIEKMANN, B; KUHN, G; RUTGERS VAN DER LOEFF, M	ANTX-5	-59.7883	-42.6986	-1	0		1.806	MS	SEDIMENTARY	UNKNOWN	UNKNOWN	SILICICLASTIC
POLAN11-2-2515-3/845		SEDDB	10.1016/S0016-7037(00)00476-2	PROVENANCE AND TRANSPORT OF TERRIGENOUS SEDIMENT IN THE SOUTH ATLANTIC OCEAN AND THEIR RELATIONS TO GLACIAL AND INTERGLACIAL CYCLES: Nd AND Sr ISOTOPIC EVIDENCE	GEOCHIM COSMOCHIM ACTA	WALTER, H; HEGNER, E; DIEKMANN, B; KUHN, G; RUTGERS VAN DER LOEFF, M	ANTXI-2	-53.545	-45.3042	-1	0		1.806	UNKNOWN	SEDIMENTARY	UNKNOWN	UNKNOWN	SILICICLASTIC																						20.25	4.22
POLAN11-2-2515-3/845		SEDDB	10.1016/S0016-7037(00)00476-2	PROVENANCE AND TRANSPORT OF TERRIGENOUS SEDIMENT IN THE SOUTH ATLANTIC OCEAN AND THEIR RELATIONS TO GLACIAL AND INTERGLACIAL CYCLES: Nd AND Sr ISOTOPIC EVIDENCE	GEOCHIM COSMOCHIM ACTA	WALTER, H; HEGNER, E; DIEKMANN, B; KUHN, G; RUTGERS VAN DER LOEFF, M	ANTXI-2	-53.545	-45.3042	-1	0		1.806	MS	SEDIMENTARY	UNKNOWN	UNKNOWN	SILICICLASTIC
POLAN10-5-2319-1/403		SEDDB	10.1016/S0016-7037(00)00476-2	PROVENANCE AND TRANSPORT OF TERRIGENOUS SEDIMENT IN THE SOUTH ATLANTIC OCEAN AND THEIR RELATIONS TO GLACIAL AND INTERGLACIAL CYCLES: Nd AND Sr ISOTOPIC EVIDENCE	GEOCHIM COSMOCHIM ACTA	WALTER, H; HEGNER, E; DIEKMANN, B; KUHN, G; RUTGERS VAN DER LOEFF, M	ANTX-5	-59.7883	-42.6986	-1	0		1.806	UNKNOWN	SEDIMENTARY	UNKNOWN	UNKNOWN	SILICICLASTIC																						22.66	4.55
POLAN10-5-2319-1/403		SEDDB	10.1016/S0016-7037(00)00476-2	PROVENANCE AND TRANSPORT OF TERRIGENOUS SEDIMENT IN THE SOUTH ATLANTIC OCEAN AND THEIR RELATIONS TO GLACIAL AND INTERGLACIAL CYCLES: Nd AND Sr ISOTOPIC EVIDENCE	GEOCHIM COSMOCHIM ACTA	WALTER, H; HEGNER, E; DIEKMANN, B; KUHN, G; RUTGERS VAN DER LOEFF, M	ANTX-5	-59.7883	-42.6986	-1	0		1.806	MS	SEDIMENTARY	UNKNOWN	UNKNOWN	SILICICLASTIC
POLAN10-5-2319-1/833		SEDDB	10.1016/S0016-7037(00)00476-2	PROVENANCE AND TRANSPORT OF TERRIGENOUS SEDIMENT IN THE SOUTH ATLANTIC OCEAN AND THEIR RELATIONS TO GLACIAL AND INTERGLACIAL CYCLES: Nd AND Sr ISOTOPIC EVIDENCE	GEOCHIM COSMOCHIM ACTA	WALTER, H; HEGNER, E; DIEKMANN, B; KUHN, G; RUTGERS VAN DER LOEFF, M	ANTX-5	-59.7883	-42.6986	-1	0		1.806	UNKNOWN	SEDIMENTARY	UNKNOWN	UNKNOWN	SILICICLASTIC																						23.9	4.61
POLAN10-5-2319-1/833		SEDDB	10.1016/S0016-7037(00)00476-2	PROVENANCE AND TRANSPORT OF TERRIGENOUS SEDIMENT IN THE SOUTH ATLANTIC OCEAN AND THEIR RELATIONS TO GLACIAL AND INTERGLACIAL CYCLES: Nd AND Sr ISOTOPIC EVIDENCE	GEOCHIM COSMOCHIM ACTA	WALTER, H; HEGNER, E; DIEKMANN, B; KUHN, G; RUTGERS VAN DER LOEFF, M	ANTX-5	-59.7883	-42.6986	-1	0		1.806	MS	SEDIMENTARY	UNKNOWN	UNKNOWN	SILICICLASTIC
POLAN10-5-2319-1/893		SEDDB	10.1016/S0016-7037(00)00476-2	PROVENANCE AND TRANSPORT OF TERRIGENOUS SEDIMENT IN THE SOUTH ATLANTIC OCEAN AND THEIR RELATIONS TO GLACIAL AND INTERGLACIAL CYCLES: Nd AND Sr ISOTOPIC EVIDENCE	GEOCHIM COSMOCHIM ACTA	WALTER, H; HEGNER, E; DIEKMANN, B; KUHN, G; RUTGERS VAN DER LOEFF, M	ANTX-5	-59.7883	-42.6986	-1	0		1.806	UNKNOWN	SEDIMENTARY	UNKNOWN	UNKNOWN	SILICICLASTIC																						23.53	4.85
POLAN10-5-2319-1/893		SEDDB	10.1016/S0016-7037(00)00476-2	PROVENANCE AND TRANSPORT OF TERRIGENOUS SEDIMENT IN THE SOUTH ATLANTIC OCEAN AND THEIR RELATIONS TO GLACIAL AND INTERGLACIAL CYCLES: Nd AND Sr ISOTOPIC EVIDENCE	GEOCHIM COSMOCHIM ACTA	WALTER, H; HEGNER, E; DIEKMANN, B; KUHN, G; RUTGERS VAN DER LOEFF, M	ANTX-5	-59.7883	-42.6986	-1	0		1.806	MS	SEDIMENTARY	UNKNOWN	UNKNOWN	SILICICLASTIC
D-ORC-15/1		SEDDB	10.1016/S0016-7037(00)00476-2	PROVENANCE AND TRANSPORT OF TERRIGENOUS SEDIMENT IN THE SOUTH ATLANTIC OCEAN AND THEIR RELATIONS TO GLACIAL AND INTERGLACIAL CYCLES: Nd AND Sr ISOTOPIC EVIDENCE	GEOCHIM COSMOCHIM ACTA	WALTER, H; HEGNER, E; DIEKMANN, B; KUHN, G; RUTGERS VAN DER LOEFF, M	UNKNOWN	-61.5833	-45.7206	-1	0		1.806	UNKNOWN	SEDIMENTARY	UNKNOWN	UNKNOWN	SILICICLASTIC																						23.98	4.85
D-ORC-15/1		SEDDB	10.1016/S0016-7037(00)00476-2	PROVENANCE AND TRANSPORT OF TERRIGENOUS SEDIMENT IN THE SOUTH ATLANTIC OCEAN AND THEIR RELATIONS TO GLACIAL AND INTERGLACIAL CYCLES: Nd AND Sr ISOTOPIC EVIDENCE	GEOCHIM COSMOCHIM ACTA	WALTER, H; HEGNER, E; DIEKMANN, B; KUHN, G; RUTGERS VAN DER LOEFF, M	UNKNOWN	-61.5833	-45.7206	-1	0		1.806	MS	SEDIMENTARY	UNKNOWN	UNKNOWN	SILICICLASTIC
POLAN11-2-2515-3/265		SEDDB	10.1016/S0016-7037(00)00476-2	PROVENANCE AND TRANSPORT OF TERRIGENOUS SEDIMENT IN THE SOUTH ATLANTIC OCEAN AND THEIR RELATIONS TO GLACIAL AND INTERGLACIAL CYCLES: Nd AND Sr ISOTOPIC EVIDENCE	GEOCHIM COSMOCHIM ACTA	WALTER, H; HEGNER, E; DIEKMANN, B; KUHN, G; RUTGERS VAN DER LOEFF, M	ANTXI-2	-53.545	-45.3042	-1	0		1.806	UNKNOWN	SEDIMENTARY	UNKNOWN	UNKNOWN	SILICICLASTIC																						20.49	4.36
POLAN11-2-2515-3/265		SEDDB	10.1016/S0016-7037(00)00476-2	PROVENANCE AND TRANSPORT OF TERRIGENOUS SEDIMENT IN THE SOUTH ATLANTIC OCEAN AND THEIR RELATIONS TO GLACIAL AND INTERGLACIAL CYCLES: Nd AND Sr ISOTOPIC EVIDENCE	GEOCHIM COSMOCHIM ACTA	WALTER, H; HEGNER, E; DIEKMANN, B; KUHN, G; RUTGERS VAN DER LOEFF, M	ANTXI-2	-53.545	-45.3042	-1	0		1.806	MS	SEDIMENTARY	UNKNOWN	UNKNOWN	SILICICLASTIC
POLAN11-2-2515-3/885		SEDDB	10.1016/S0016-7037(00)00476-2	PROVENANCE AND TRANSPORT OF TERRIGENOUS SEDIMENT IN THE SOUTH ATLANTIC OCEAN AND THEIR RELATIONS TO GLACIAL AND INTERGLACIAL CYCLES: Nd AND Sr ISOTOPIC EVIDENCE	GEOCHIM COSMOCHIM ACTA	WALTER, H; HEGNER, E; DIEKMANN, B; KUHN, G; RUTGERS VAN DER LOEFF, M	ANTXI-2	-53.545	-45.3042	-1	0		1.806	UNKNOWN	SEDIMENTARY	UNKNOWN	UNKNOWN	SILICICLASTIC																						20.86	4.4
POLAN11-2-2515-3/885		SEDDB	10.1016/S0016-7037(00)00476-2	PROVENANCE AND TRANSPORT OF TERRIGENOUS SEDIMENT IN THE SOUTH ATLANTIC OCEAN AND THEIR RELATIONS TO GLACIAL AND INTERGLACIAL CYCLES: Nd AND Sr ISOTOPIC EVIDENCE	GEOCHIM COSMOCHIM ACTA	WALTER, H; HEGNER, E; DIEKMANN, B; KUHN, G; RUTGERS VAN DER LOEFF, M	ANTXI-2	-53.545	-45.3042	-1	0		1.806	MS	SEDIMENTARY	UNKNOWN	UNKNOWN	SILICICLASTIC
POLAN11-2-2515-3/1145		SEDDB	10.1016/S0016-7037(00)00476-2	PROVENANCE AND TRANSPORT OF TERRIGENOUS SEDIMENT IN THE SOUTH ATLANTIC OCEAN AND THEIR RELATIONS TO GLACIAL AND INTERGLACIAL CYCLES: Nd AND Sr ISOTOPIC EVIDENCE	GEOCHIM COSMOCHIM ACTA	WALTER, H; HEGNER, E; DIEKMANN, B; KUHN, G; RUTGERS VAN DER LOEFF, M	ANTXI-2	-53.545	-45.3042	-1	0		1.806	UNKNOWN	SEDIMENTARY	UNKNOWN	UNKNOWN	SILICICLASTIC																						18.45	3.78
POLAN11-2-2515-3/1145		SEDDB	10.1016/S0016-7037(00)00476-2	PROVENANCE AND TRANSPORT OF TERRIGENOUS SEDIMENT IN THE SOUTH ATLANTIC OCEAN AND THEIR RELATIONS TO GLACIAL AND INTERGLACIAL CYCLES: Nd AND Sr ISOTOPIC EVIDENCE	GEOCHIM COSMOCHIM ACTA	WALTER, H; HEGNER, E; DIEKMANN, B; KUHN, G; RUTGERS VAN DER LOEFF, M	ANTXI-2	-53.545	-45.3042	-1	0		1.806	MS	SEDIMENTARY	UNKNOWN	UNKNOWN	SILICICLASTIC
POLAN10-5-2319-1/473		SEDDB	10.1016/S0016-7037(00)00476-2	PROVENANCE AND TRANSPORT OF TERRIGENOUS SEDIMENT IN THE SOUTH ATLANTIC OCEAN AND THEIR RELATIONS TO GLACIAL AND INTERGLACIAL CYCLES: Nd AND Sr ISOTOPIC EVIDENCE	GEOCHIM COSMOCHIM ACTA	WALTER, H; HEGNER, E; DIEKMANN, B; KUHN, G; RUTGERS VAN DER LOEFF, M	ANTX-5	-59.7883	-42.6986	-1	0		1.806	UNKNOWN	SEDIMENTARY	UNKNOWN	UNKNOWN	SILICICLASTIC																						23.65	4.73
POLAN10-5-2319-1/473		SEDDB	10.1016/S0016-7037(00)00476-2	PROVENANCE AND TRANSPORT OF TERRIGENOUS SEDIMENT IN THE SOUTH ATLANTIC OCEAN AND THEIR RELATIONS TO GLACIAL AND INTERGLACIAL CYCLES: Nd AND Sr ISOTOPIC EVIDENCE	GEOCHIM COSMOCHIM ACTA	WALTER, H; HEGNER, E; DIEKMANN, B; KUHN, G; RUTGERS VAN DER LOEFF, M	ANTX-5	-59.7883	-42.6986	-1	0		1.806	MS	SEDIMENTARY	UNKNOWN	UNKNOWN	SILICICLASTIC
POLAN14-3-2805-1/1		SEDDB	10.1016/S0016-7037(00)00476-2	PROVENANCE AND TRANSPORT OF TERRIGENOUS SEDIMENT IN THE SOUTH ATLANTIC OCEAN AND THEIR RELATIONS TO GLACIAL AND INTERGLACIAL CYCLES: Nd AND Sr ISOTOPIC EVIDENCE	GEOCHIM COSMOCHIM ACTA	WALTER, H; HEGNER, E; DIEKMANN, B; KUHN, G; RUTGERS VAN DER LOEFF, M	ANTXIV-3	-66.0867	-56.5428	-1	0		1.806	UNKNOWN	SEDIMENTARY	UNKNOWN	UNKNOWN	SILICICLASTIC																						21.2	4.01
POLAN14-3-2805-1/1		SEDDB	10.1016/S0016-7037(00)00476-2	PROVENANCE AND TRANSPORT OF TERRIGENOUS SEDIMENT IN THE SOUTH ATLANTIC OCEAN AND THEIR RELATIONS TO GLACIAL AND INTERGLACIAL CYCLES: Nd AND Sr ISOTOPIC EVIDENCE	GEOCHIM COSMOCHIM ACTA	WALTER, H; HEGNER, E; DIEKMANN, B; KUHN, G; RUTGERS VAN DER LOEFF, M	ANTXIV-3	-66.0867	-56.5428	-1	0		1.806	MS	SEDIMENTARY	UNKNOWN	UNKNOWN	SILICICLASTIC
POLAN05-4-1490-2/1		SEDDB	10.1016/S0016-7037(00)00476-2	PROVENANCE AND TRANSPORT OF TERRIGENOUS SEDIMENT IN THE SOUTH ATLANTIC OCEAN AND THEIR RELATIONS TO GLACIAL AND INTERGLACIAL CYCLES: Nd AND Sr ISOTOPIC EVIDENCE	GEOCHIM COSMOCHIM ACTA	WALTER, H; HEGNER, E; DIEKMANN, B; KUHN, G; RUTGERS VAN DER LOEFF, M	ANTV-4	-74.6783	-35.1069	-1	0		1.806	UNKNOWN	SEDIMENTARY	UNKNOWN	UNKNOWN	SILICICLASTIC																						10.64	2
POLAN05-4-1490-2/1		SEDDB	10.1016/S0016-7037(00)00476-2	PROVENANCE AND TRANSPORT OF TERRIGENOUS SEDIMENT IN THE SOUTH ATLANTIC OCEAN AND THEIR RELATIONS TO GLACIAL AND INTERGLACIAL CYCLES: Nd AND Sr ISOTOPIC EVIDENCE	GEOCHIM COSMOCHIM ACTA	WALTER, H; HEGNER, E; DIEKMANN, B; KUHN, G; RUTGERS VAN DER LOEFF, M	ANTV-4	-74.6783	-35.1069	-1	0		1.806	MS	SEDIMENTARY	UNKNOWN	UNKNOWN	SILICICLASTIC
PSANDP3-021/4.25		SEDDB	10.1016/j.dsr2.2207.07.007	RECENT DEEP-WATER SEDIMENTATION, TRACE METAL AND RADIOISOTOPE GEOCHEMISTRY ACROSS THE SOUTHERN OCEAN AND NORTHERN WEDELL SEA, ANTARCTICA	DEEP SEA RESEARCH	HOWE, J; WILSON, C; SHIMMIELD, T; DIAZ, R; CARPENTER, L	ANDEEP III	-47.6573	4.2608	-1				ICPMS	SEDIMENTARY	UNKNOWN	UNKNOWN	SILICICLASTIC
PSANDP3-021/4.75		SEDDB	10.1016/j.dsr2.2207.07.007	RECENT DEEP-WATER SEDIMENTATION, TRACE METAL AND RADIOISOTOPE GEOCHEMISTRY ACROSS THE SOUTHERN OCEAN AND NORTHERN WEDELL SEA, ANTARCTICA	DEEP SEA RESEARCH	HOWE, J; WILSON, C; SHIMMIELD, T; DIAZ, R; CARPENTER, L	ANDEEP III	-47.6573	4.2608	-1				ICPMS	SEDIMENTARY	UNKNOWN	UNKNOWN	SILICICLASTIC
PSANDP3-021/9.5		SEDDB	10.1016/j.dsr2.2207.07.007	RECENT DEEP-WATER SEDIMENTATION, TRACE METAL AND RADIOISOTOPE GEOCHEMISTRY ACROSS THE SOUTHERN OCEAN AND NORTHERN WEDELL SEA, ANTARCTICA	DEEP SEA RESEARCH	HOWE, J; WILSON, C; SHIMMIELD, T; DIAZ, R; CARPENTER, L	ANDEEP III	-47.6573	4.2608	-1				ICPMS	SEDIMENTARY	UNKNOWN	UNKNOWN	SILICICLASTIC
PSANDP3-021/20		SEDDB	10.1016/j.dsr2.2207.07.007	RECENT DEEP-WATER SEDIMENTATION, TRACE METAL AND RADIOISOTOPE GEOCHEMISTRY ACROSS THE SOUTHERN OCEAN AND NORTHERN WEDELL SEA, ANTARCTICA	DEEP SEA RESEARCH	HOWE, J; WILSON, C; SHIMMIELD, T; DIAZ, R; CARPENTER, L	ANDEEP III	-47.6573	4.2608	-1				ICPMS	SEDIMENTARY	UNKNOWN	UNKNOWN	SILICICLASTIC
PSANDP3-080/1.25		SEDDB	10.1016/j.dsr2.2207.07.007	RECENT DEEP-WATER SEDIMENTATION, TRACE METAL AND RADIOISOTOPE GEOCHEMISTRY ACROSS THE SOUTHERN OCEAN AND NORTHERN WEDELL SEA, ANTARCTICA	DEEP SEA RESEARCH	HOWE, J; WILSON, C; SHIMMIELD, T; DIAZ, R; CARPENTER, L	ANDEEP III	-70.6606	-14.7245	-1				ICPMS	SEDIMENTARY	UNKNOWN	UNKNOWN	SILICICLASTIC
PSANDP3-080/2.25		SEDDB	10.1016/j.dsr2.2207.07.007	RECENT DEEP-WATER SEDIMENTATION, TRACE METAL AND RADIOISOTOPE GEOCHEMISTRY ACROSS THE SOUTHERN OCEAN AND NORTHERN WEDELL SEA, ANTARCTICA	DEEP SEA RESEARCH	HOWE, J; WILSON, C; SHIMMIELD, T; DIAZ, R; CARPENTER, L	ANDEEP III	-70.6606	-14.7245	-1				ICPMS	SEDIMENTARY	UNKNOWN	UNKNOWN	SILICICLASTIC
PSANDP3-152/11.5		SEDDB	10.1016/j.dsr2.2207.07.007	RECENT DEEP-WATER SEDIMENTATION, TRACE METAL AND RADIOISOTOPE GEOCHEMISTRY ACROSS THE SOUTHERN OCEAN AND NORTHERN WEDELL SEA, ANTARCTICA	DEEP SEA RESEARCH	HOWE, J; WILSON, C; SHIMMIELD, T; DIAZ, R; CARPENTER, L	ANDEEP III	-62.3488	-57.9003	-1				ICPMS	SEDIMENTARY	UNKNOWN	UNKNOWN	SILICICLASTIC
PSANDP3-152/46		SEDDB	10.1016/j.dsr2.2207.07.007	RECENT DEEP-WATER SEDIMENTATION, TRACE METAL AND RADIOISOTOPE GEOCHEMISTRY ACROSS THE SOUTHERN OCEAN AND NORTHERN WEDELL SEA, ANTARCTICA	DEEP SEA RESEARCH	HOWE, J; WILSON, C; SHIMMIELD, T; DIAZ, R; CARPENTER, L	ANDEEP III	-62.3488	-57.9003	-1				ICPMS	SEDIMENTARY	UNKNOWN	UNKNOWN	SILICICLASTIC
PSANDP3-153/1.25		SEDDB	10.1016/j.dsr2.2207.07.007	RECENT DEEP-WATER SEDIMENTATION, TRACE METAL AND RADIOISOTOPE GEOCHEMISTRY ACROSS THE SOUTHERN OCEAN AND NORTHERN WEDELL SEA, ANTARCTICA	DEEP SEA RESEARCH	HOWE, J; WILSON, C; SHIMMIELD, T; DIAZ, R; CARPENTER, L	ANDEEP III	-63.3403	-64.6132	-1				ICPMS	SEDIMENTARY	UNKNOWN	UNKNOWN	SILICICLASTIC
PSANDP3-153/2.25		SEDDB	10.1016/j.dsr2.2207.07.007	RECENT DEEP-WATER SEDIMENTATION, TRACE METAL AND RADIOISOTOPE GEOCHEMISTRY ACROSS THE SOUTHERN OCEAN AND NORTHERN WEDELL SEA, ANTARCTICA	DEEP SEA RESEARCH	HOWE, J; WILSON, C; SHIMMIELD, T; DIAZ, R; CARPENTER, L	ANDEEP III	-63.3403	-64.6132	-1				ICPMS	SEDIMENTARY	UNKNOWN	UNKNOWN	SILICICLASTIC
PSANDP3-153/4.25		SEDDB	10.1016/j.dsr2.2207.07.007	RECENT DEEP-WATER SEDIMENTATION, TRACE METAL AND RADIOISOTOPE GEOCHEMISTRY ACROSS THE SOUTHERN OCEAN AND NORTHERN WEDELL SEA, ANTARCTICA	DEEP SEA RESEARCH	HOWE, J; WILSON, C; SHIMMIELD, T; DIAZ, R; CARPENTER, L	ANDEEP III	-63.3403	-64.6132	-1				ICPMS	SEDIMENTARY	UNKNOWN	UNKNOWN	SILICICLASTIC
PSANDP3-153/6.5		SEDDB	10.1016/j.dsr2.2207.07.007	RECENT DEEP-WATER SEDIMENTATION, TRACE METAL AND RADIOISOTOPE GEOCHEMISTRY ACROSS THE SOUTHERN OCEAN AND NORTHERN WEDELL SEA, ANTARCTICA	DEEP SEA RESEARCH	HOWE, J; WILSON, C; SHIMMIELD, T; DIAZ, R; CARPENTER, L	ANDEEP III	-63.3403	-64.6132	-1				ICPMS	SEDIMENTARY	UNKNOWN	UNKNOWN	SILICICLASTIC
PSANDP3-153/18		SEDDB	10.1016/j.dsr2.2207.07.007	RECENT DEEP-WATER SEDIMENTATION, TRACE METAL AND RADIOISOTOPE GEOCHEMISTRY ACROSS THE SOUTHERN OCEAN AND NORTHERN WEDELL SEA, ANTARCTICA	DEEP SEA RESEARCH	HOWE, J; WILSON, C; SHIMMIELD, T; DIAZ, R; CARPENTER, L	ANDEEP III	-63.3403	-64.6132	-1				ICPMS	SEDIMENTARY	UNKNOWN	UNKNOWN	SILICICLASTIC
PSANDP3-021/0.25		SEDDB	10.1016/j.dsr2.2207.07.007	RECENT DEEP-WATER SEDIMENTATION, TRACE METAL AND RADIOISOTOPE GEOCHEMISTRY ACROSS THE SOUTHERN OCEAN AND NORTHERN WEDELL SEA, ANTARCTICA	DEEP SEA RESEARCH	HOWE, J; WILSON, C; SHIMMIELD, T; DIAZ, R; CARPENTER, L	ANDEEP III	-47.6573	4.2608	-1				ICPMS	SEDIMENTARY	UNKNOWN	UNKNOWN	SILICICLASTIC
PSANDP3-021/2.75		SEDDB	10.1016/j.dsr2.2207.07.007	RECENT DEEP-WATER SEDIMENTATION, TRACE METAL AND RADIOISOTOPE GEOCHEMISTRY ACROSS THE SOUTHERN OCEAN AND NORTHERN WEDELL SEA, ANTARCTICA	DEEP SEA RESEARCH	HOWE, J; WILSON, C; SHIMMIELD, T; DIAZ, R; CARPENTER, L	ANDEEP III	-47.6573	4.2608	-1				ICPMS	SEDIMENTARY	UNKNOWN	UNKNOWN	SILICICLASTIC
PSANDP3-021/3.25		SEDDB	10.1016/j.dsr2.2207.07.007	RECENT DEEP-WATER SEDIMENTATION, TRACE METAL AND RADIOISOTOPE GEOCHEMISTRY ACROSS THE SOUTHERN OCEAN AND NORTHERN WEDELL SEA, ANTARCTICA	DEEP SEA RESEARCH	HOWE, J; WILSON, C; SHIMMIELD, T; DIAZ, R; CARPENTER, L	ANDEEP III	-47.6573	4.2608	-1				ICPMS	SEDIMENTARY	UNKNOWN	UNKNOWN	SILICICLASTIC
PSANDP3-021/18		SEDDB	10.1016/j.dsr2.2207.07.007	RECENT DEEP-WATER SEDIMENTATION, TRACE METAL AND RADIOISOTOPE GEOCHEMISTRY ACROSS THE SOUTHERN OCEAN AND NORTHERN WEDELL SEA, ANTARCTICA	DEEP SEA RESEARCH	HOWE, J; WILSON, C; SHIMMIELD, T; DIAZ, R; CARPENTER, L	ANDEEP III	-47.6573	4.2608	-1				ICPMS	SEDIMENTARY	UNKNOWN	UNKNOWN	SILICICLASTIC
PSANDP3-153/1.75		SEDDB	10.1016/j.dsr2.2207.07.007	RECENT DEEP-WATER SEDIMENTATION, TRACE METAL AND RADIOISOTOPE GEOCHEMISTRY ACROSS THE SOUTHERN OCEAN AND NORTHERN WEDELL SEA, ANTARCTICA	DEEP SEA RESEARCH	HOWE, J; WILSON, C; SHIMMIELD, T; DIAZ, R; CARPENTER, L	ANDEEP III	-63.3403	-64.6132	-1				ICPMS	SEDIMENTARY	UNKNOWN	UNKNOWN	SILICICLASTIC
PSANDP3-021/3.75		SEDDB	10.1016/j.dsr2.2207.07.007	RECENT DEEP-WATER SEDIMENTATION, TRACE METAL AND RADIOISOTOPE GEOCHEMISTRY ACROSS THE SOUTHERN OCEAN AND NORTHERN WEDELL SEA, ANTARCTICA	DEEP SEA RESEARCH	HOWE, J; WILSON, C; SHIMMIELD, T; DIAZ, R; CARPENTER, L	ANDEEP III	-47.6573	4.2608	-1				ICPMS	SEDIMENTARY	UNKNOWN	UNKNOWN	SILICICLASTIC
PSANDP3-021/5.5		SEDDB	10.1016/j.dsr2.2207.07.007	RECENT DEEP-WATER SEDIMENTATION, TRACE METAL AND RADIOISOTOPE GEOCHEMISTRY ACROSS THE SOUTHERN OCEAN AND NORTHERN WEDELL SEA, ANTARCTICA	DEEP SEA RESEARCH	HOWE, J; WILSON, C; SHIMMIELD, T; DIAZ, R; CARPENTER, L	ANDEEP III	-47.6573	4.2608	-1				ICPMS	SEDIMENTARY	UNKNOWN	UNKNOWN	SILICICLASTIC
PSANDP3-021/16		SEDDB	10.1016/j.dsr2.2207.07.007	RECENT DEEP-WATER SEDIMENTATION, TRACE METAL AND RADIOISOTOPE GEOCHEMISTRY ACROSS THE SOUTHERN OCEAN AND NORTHERN WEDELL SEA, ANTARCTICA	DEEP SEA RESEARCH	HOWE, J; WILSON, C; SHIMMIELD, T; DIAZ, R; CARPENTER, L	ANDEEP III	-47.6573	4.2608	-1				ICPMS	SEDIMENTARY	UNKNOWN	UNKNOWN	SILICICLASTIC
PSANDP3-021/28		SEDDB	10.1016/j.dsr2.2207.07.007	RECENT DEEP-WATER SEDIMENTATION, TRACE METAL AND RADIOISOTOPE GEOCHEMISTRY ACROSS THE SOUTHERN OCEAN AND NORTHERN WEDELL SEA, ANTARCTICA	DEEP SEA RESEARCH	HOWE, J; WILSON, C; SHIMMIELD, T; DIAZ, R; CARPENTER, L	ANDEEP III	-47.6573	4.2608	-1				ICPMS	SEDIMENTARY	UNKNOWN	UNKNOWN	SILICICLASTIC
PSANDP3-080/1.75		SEDDB	10.1016/j.dsr2.2207.07.007	RECENT DEEP-WATER SEDIMENTATION, TRACE METAL AND RADIOISOTOPE GEOCHEMISTRY ACROSS THE SOUTHERN OCEAN AND NORTHERN WEDELL SEA, ANTARCTICA	DEEP SEA RESEARCH	HOWE, J; WILSON, C; SHIMMIELD, T; DIAZ, R; CARPENTER, L	ANDEEP III	-70.6606	-14.7245	-1				ICPMS	SEDIMENTARY	UNKNOWN	UNKNOWN	SILICICLASTIC
PSANDP3-153/3.25		SEDDB	10.1016/j.dsr2.2207.07.007	RECENT DEEP-WATER SEDIMENTATION, TRACE METAL AND RADIOISOTOPE GEOCHEMISTRY ACROSS THE SOUTHERN OCEAN AND NORTHERN WEDELL SEA, ANTARCTICA	DEEP SEA RESEARCH	HOWE, J; WILSON, C; SHIMMIELD, T; DIAZ, R; CARPENTER, L	ANDEEP III	-63.3403	-64.6132	-1				ICPMS	SEDIMENTARY	UNKNOWN	UNKNOWN	SILICICLASTIC
PSANDP3-153/7.5		SEDDB	10.1016/j.dsr2.2207.07.007	RECENT DEEP-WATER SEDIMENTATION, TRACE METAL AND RADIOISOTOPE GEOCHEMISTRY ACROSS THE SOUTHERN OCEAN AND NORTHERN WEDELL SEA, ANTARCTICA	DEEP SEA RESEARCH	HOWE, J; WILSON, C; SHIMMIELD, T; DIAZ, R; CARPENTER, L	ANDEEP III	-63.3403	-64.6132	-1				ICPMS	SEDIMENTARY	UNKNOWN	UNKNOWN	SILICICLASTIC
PSANDP3-153/11.5		SEDDB	10.1016/j.dsr2.2207.07.007	RECENT DEEP-WATER SEDIMENTATION, TRACE METAL AND RADIOISOTOPE GEOCHEMISTRY ACROSS THE SOUTHERN OCEAN AND NORTHERN WEDELL SEA, ANTARCTICA	DEEP SEA RESEARCH	HOWE, J; WILSON, C; SHIMMIELD, T; DIAZ, R; CARPENTER, L	ANDEEP III	-63.3403	-64.6132	-1				ICPMS	SEDIMENTARY	UNKNOWN	UNKNOWN	SILICICLASTIC
PSANDP3-021/1.25		SEDDB	10.1016/j.dsr2.2207.07.007	RECENT DEEP-WATER SEDIMENTATION, TRACE METAL AND RADIOISOTOPE GEOCHEMISTRY ACROSS THE SOUTHERN OCEAN AND NORTHERN WEDELL SEA, ANTARCTICA	DEEP SEA RESEARCH	HOWE, J; WILSON, C; SHIMMIELD, T; DIAZ, R; CARPENTER, L	ANDEEP III	-47.6573	4.2608	-1				ICPMS	SEDIMENTARY	UNKNOWN	UNKNOWN	SILICICLASTIC
PSANDP3-021/11.5		SEDDB	10.1016/j.dsr2.2207.07.007	RECENT DEEP-WATER SEDIMENTATION, TRACE METAL AND RADIOISOTOPE GEOCHEMISTRY ACROSS THE SOUTHERN OCEAN AND NORTHERN WEDELL SEA, ANTARCTICA	DEEP SEA RESEARCH	HOWE, J; WILSON, C; SHIMMIELD, T; DIAZ, R; CARPENTER, L	ANDEEP III	-47.6573	4.2608	-1				ICPMS	SEDIMENTARY	UNKNOWN	UNKNOWN	SILICICLASTIC
PSANDP3-080/0.75		SEDDB	10.1016/j.dsr2.2207.07.007	RECENT DEEP-WATER SEDIMENTATION, TRACE METAL AND RADIOISOTOPE GEOCHEMISTRY ACROSS THE SOUTHERN OCEAN AND NORTHERN WEDELL SEA, ANTARCTICA	DEEP SEA RESEARCH	HOWE, J; WILSON, C; SHIMMIELD, T; DIAZ, R; CARPENTER, L	ANDEEP III	-70.6606	-14.7245	-1				ICPMS	SEDIMENTARY	UNKNOWN	UNKNOWN	SILICICLASTIC
PSANDP3-080/7.5		SEDDB	10.1016/j.dsr2.2207.07.007	RECENT DEEP-WATER SEDIMENTATION, TRACE METAL AND RADIOISOTOPE GEOCHEMISTRY ACROSS THE SOUTHERN OCEAN AND NORTHERN WEDELL SEA, ANTARCTICA	DEEP SEA RESEARCH	HOWE, J; WILSON, C; SHIMMIELD, T; DIAZ, R; CARPENTER, L	ANDEEP III	-70.6606	-14.7245	-1				ICPMS	SEDIMENTARY	UNKNOWN	UNKNOWN	SILICICLASTIC
PSANDP3-152/6.5		SEDDB	10.1016/j.dsr2.2207.07.007	RECENT DEEP-WATER SEDIMENTATION, TRACE METAL AND RADIOISOTOPE GEOCHEMISTRY ACROSS THE SOUTHERN OCEAN AND NORTHERN WEDELL SEA, ANTARCTICA	DEEP SEA RESEARCH	HOWE, J; WILSON, C; SHIMMIELD, T; DIAZ, R; CARPENTER, L	ANDEEP III	-62.3488	-57.9003	-1				ICPMS	SEDIMENTARY	UNKNOWN	UNKNOWN	SILICICLASTIC
PSANDP3-152/7.5		SEDDB	10.1016/j.dsr2.2207.07.007	RECENT DEEP-WATER SEDIMENTATION, TRACE METAL AND RADIOISOTOPE GEOCHEMISTRY ACROSS THE SOUTHERN OCEAN AND NORTHERN WEDELL SEA, ANTARCTICA	DEEP SEA RESEARCH	HOWE, J; WILSON, C; SHIMMIELD, T; DIAZ, R; CARPENTER, L	ANDEEP III	-62.3488	-57.9003	-1				ICPMS	SEDIMENTARY	UNKNOWN	UNKNOWN	SILICICLASTIC
PSANDP3-152/8.5		SEDDB	10.1016/j.dsr2.2207.07.007	RECENT DEEP-WATER SEDIMENTATION, TRACE METAL AND RADIOISOTOPE GEOCHEMISTRY ACROSS THE SOUTHERN OCEAN AND NORTHERN WEDELL SEA, ANTARCTICA	DEEP SEA RESEARCH	HOWE, J; WILSON, C; SHIMMIELD, T; DIAZ, R; CARPENTER, L	ANDEEP III	-62.3488	-57.9003	-1				ICPMS	SEDIMENTARY	UNKNOWN	UNKNOWN	SILICICLASTIC
PSANDP3-152/20		SEDDB	10.1016/j.dsr2.2207.07.007	RECENT DEEP-WATER SEDIMENTATION, TRACE METAL AND RADIOISOTOPE GEOCHEMISTRY ACROSS THE SOUTHERN OCEAN AND NORTHERN WEDELL SEA, ANTARCTICA	DEEP SEA RESEARCH	HOWE, J; WILSON, C; SHIMMIELD, T; DIAZ, R; CARPENTER, L	ANDEEP III	-62.3488	-57.9003	-1				ICPMS	SEDIMENTARY	UNKNOWN	UNKNOWN	SILICICLASTIC
PSANDP3-153/13.5		SEDDB	10.1016/j.dsr2.2207.07.007	RECENT DEEP-WATER SEDIMENTATION, TRACE METAL AND RADIOISOTOPE GEOCHEMISTRY ACROSS THE SOUTHERN OCEAN AND NORTHERN WEDELL SEA, ANTARCTICA	DEEP SEA RESEARCH	HOWE, J; WILSON, C; SHIMMIELD, T; DIAZ, R; CARPENTER, L	ANDEEP III	-63.3403	-64.6132	-1				ICPMS	SEDIMENTARY	UNKNOWN	UNKNOWN	SILICICLASTIC
PSANDP3-153/20		SEDDB	10.1016/j.dsr2.2207.07.007	RECENT DEEP-WATER SEDIMENTATION, TRACE METAL AND RADIOISOTOPE GEOCHEMISTRY ACROSS THE SOUTHERN OCEAN AND NORTHERN WEDELL SEA, ANTARCTICA	DEEP SEA RESEARCH	HOWE, J; WILSON, C; SHIMMIELD, T; DIAZ, R; CARPENTER, L	ANDEEP III	-63.3403	-64.6132	-1				ICPMS	SEDIMENTARY	UNKNOWN	UNKNOWN	SILICICLASTIC
PSANDP3-021/7.5		SEDDB	10.1016/j.dsr2.2207.07.007	RECENT DEEP-WATER SEDIMENTATION, TRACE METAL AND RADIOISOTOPE GEOCHEMISTRY ACROSS THE SOUTHERN OCEAN AND NORTHERN WEDELL SEA, ANTARCTICA	DEEP SEA RESEARCH	HOWE, J; WILSON, C; SHIMMIELD, T; DIAZ, R; CARPENTER, L	ANDEEP III	-47.6573	4.2608	-1				ICPMS	SEDIMENTARY	UNKNOWN	UNKNOWN	SILICICLASTIC
PSANDP3-021/8.5		SEDDB	10.1016/j.dsr2.2207.07.007	RECENT DEEP-WATER SEDIMENTATION, TRACE METAL AND RADIOISOTOPE GEOCHEMISTRY ACROSS THE SOUTHERN OCEAN AND NORTHERN WEDELL SEA, ANTARCTICA	DEEP SEA RESEARCH	HOWE, J; WILSON, C; SHIMMIELD, T; DIAZ, R; CARPENTER, L	ANDEEP III	-47.6573	4.2608	-1				ICPMS	SEDIMENTARY	UNKNOWN	UNKNOWN	SILICICLASTIC
PSANDP3-021/13.5		SEDDB	10.1016/j.dsr2.2207.07.007	RECENT DEEP-WATER SEDIMENTATION, TRACE METAL AND RADIOISOTOPE GEOCHEMISTRY ACROSS THE SOUTHERN OCEAN AND NORTHERN WEDELL SEA, ANTARCTICA	DEEP SEA RESEARCH	HOWE, J; WILSON, C; SHIMMIELD, T; DIAZ, R; CARPENTER, L	ANDEEP III	-47.6573	4.2608	-1				ICPMS	SEDIMENTARY	UNKNOWN	UNKNOWN	SILICICLASTIC
PSANDP3-080/2.75		SEDDB	10.1016/j.dsr2.2207.07.007	RECENT DEEP-WATER SEDIMENTATION, TRACE METAL AND RADIOISOTOPE GEOCHEMISTRY ACROSS THE SOUTHERN OCEAN AND NORTHERN WEDELL SEA, ANTARCTICA	DEEP SEA RESEARCH	HOWE, J; WILSON, C; SHIMMIELD, T; DIAZ, R; CARPENTER, L	ANDEEP III	-70.6606	-14.7245	-1				ICPMS	SEDIMENTARY	UNKNOWN	UNKNOWN	SILICICLASTIC
PSANDP3-080/3.25		SEDDB	10.1016/j.dsr2.2207.07.007	RECENT DEEP-WATER SEDIMENTATION, TRACE METAL AND RADIOISOTOPE GEOCHEMISTRY ACROSS THE SOUTHERN OCEAN AND NORTHERN WEDELL SEA, ANTARCTICA	DEEP SEA RESEARCH	HOWE, J; WILSON, C; SHIMMIELD, T; DIAZ, R; CARPENTER, L	ANDEEP III	-70.6606	-14.7245	-1				ICPMS	SEDIMENTARY	UNKNOWN	UNKNOWN	SILICICLASTIC
PSANDP3-080/6.5		SEDDB	10.1016/j.dsr2.2207.07.007	RECENT DEEP-WATER SEDIMENTATION, TRACE METAL AND RADIOISOTOPE GEOCHEMISTRY ACROSS THE SOUTHERN OCEAN AND NORTHERN WEDELL SEA, ANTARCTICA	DEEP SEA RESEARCH	HOWE, J; WILSON, C; SHIMMIELD, T; DIAZ, R; CARPENTER, L	ANDEEP III	-70.6606	-14.7245	-1				ICPMS	SEDIMENTARY	UNKNOWN	UNKNOWN	SILICICLASTIC
PSANDP3-152/2.5		SEDDB	10.1016/j.dsr2.2207.07.007	RECENT DEEP-WATER SEDIMENTATION, TRACE METAL AND RADIOISOTOPE GEOCHEMISTRY ACROSS THE SOUTHERN OCEAN AND NORTHERN WEDELL SEA, ANTARCTICA	DEEP SEA RESEARCH	HOWE, J; WILSON, C; SHIMMIELD, T; DIAZ, R; CARPENTER, L	ANDEEP III	-62.3488	-57.9003	-1				ICPMS	SEDIMENTARY	UNKNOWN	UNKNOWN	SILICICLASTIC
PSANDP3-152/15.5		SEDDB	10.1016/j.dsr2.2207.07.007	RECENT DEEP-WATER SEDIMENTATION, TRACE METAL AND RADIOISOTOPE GEOCHEMISTRY ACROSS THE SOUTHERN OCEAN AND NORTHERN WEDELL SEA, ANTARCTICA	DEEP SEA RESEARCH	HOWE, J; WILSON, C; SHIMMIELD, T; DIAZ, R; CARPENTER, L	ANDEEP III	-62.3488	-57.9003	-1				ICPMS	SEDIMENTARY	UNKNOWN	UNKNOWN	SILICICLASTIC
PSANDP3-152/24		SEDDB	10.1016/j.dsr2.2207.07.007	RECENT DEEP-WATER SEDIMENTATION, TRACE METAL AND RADIOISOTOPE GEOCHEMISTRY ACROSS THE SOUTHERN OCEAN AND NORTHERN WEDELL SEA, ANTARCTICA	DEEP SEA RESEARCH	HOWE, J; WILSON, C; SHIMMIELD, T; DIAZ, R; CARPENTER, L	ANDEEP III	-62.3488	-57.9003	-1				ICPMS	SEDIMENTARY	UNKNOWN	UNKNOWN	SILICICLASTIC
PSANDP3-152/28		SEDDB	10.1016/j.dsr2.2207.07.007	RECENT DEEP-WATER SEDIMENTATION, TRACE METAL AND RADIOISOTOPE GEOCHEMISTRY ACROSS THE SOUTHERN OCEAN AND NORTHERN WEDELL SEA, ANTARCTICA	DEEP SEA RESEARCH	HOWE, J; WILSON, C; SHIMMIELD, T; DIAZ, R; CARPENTER, L	ANDEEP III	-62.3488	-57.9003	-1				ICPMS	SEDIMENTARY	UNKNOWN	UNKNOWN	SILICICLASTIC
PSANDP3-153/3.75		SEDDB	10.1016/j.dsr2.2207.07.007	RECENT DEEP-WATER SEDIMENTATION, TRACE METAL AND RADIOISOTOPE GEOCHEMISTRY ACROSS THE SOUTHERN OCEAN AND NORTHERN WEDELL SEA, ANTARCTICA	DEEP SEA RESEARCH	HOWE, J; WILSON, C; SHIMMIELD, T; DIAZ, R; CARPENTER, L	ANDEEP III	-63.3403	-64.6132	-1				ICPMS	SEDIMENTARY	UNKNOWN	UNKNOWN	SILICICLASTIC
PSANDP3-153/4.75		SEDDB	10.1016/j.dsr2.2207.07.007	RECENT DEEP-WATER SEDIMENTATION, TRACE METAL AND RADIOISOTOPE GEOCHEMISTRY ACROSS THE SOUTHERN OCEAN AND NORTHERN WEDELL SEA, ANTARCTICA	DEEP SEA RESEARCH	HOWE, J; WILSON, C; SHIMMIELD, T; DIAZ, R; CARPENTER, L	ANDEEP III	-63.3403	-64.6132	-1				ICPMS	SEDIMENTARY	UNKNOWN	UNKNOWN	SILICICLASTIC
PSANDP3-153/9.5		SEDDB	10.1016/j.dsr2.2207.07.007	RECENT DEEP-WATER SEDIMENTATION, TRACE METAL AND RADIOISOTOPE GEOCHEMISTRY ACROSS THE SOUTHERN OCEAN AND NORTHERN WEDELL SEA, ANTARCTICA	DEEP SEA RESEARCH	HOWE, J; WILSON, C; SHIMMIELD, T; DIAZ, R; CARPENTER, L	ANDEEP III	-63.3403	-64.6132	-1				ICPMS	SEDIMENTARY	UNKNOWN	UNKNOWN	SILICICLASTIC
PSANDP3-152/1.5		SEDDB	10.1016/j.dsr2.2207.07.007	RECENT DEEP-WATER SEDIMENTATION, TRACE METAL AND RADIOISOTOPE GEOCHEMISTRY ACROSS THE SOUTHERN OCEAN AND NORTHERN WEDELL SEA, ANTARCTICA	DEEP SEA RESEARCH	HOWE, J; WILSON, C; SHIMMIELD, T; DIAZ, R; CARPENTER, L	ANDEEP III	-62.3488	-57.9003	-1				ICPMS	SEDIMENTARY	UNKNOWN	UNKNOWN	SILICICLASTIC
PSANDP3-152/4.5		SEDDB	10.1016/j.dsr2.2207.07.007	RECENT DEEP-WATER SEDIMENTATION, TRACE METAL AND RADIOISOTOPE GEOCHEMISTRY ACROSS THE SOUTHERN OCEAN AND NORTHERN WEDELL SEA, ANTARCTICA	DEEP SEA RESEARCH	HOWE, J; WILSON, C; SHIMMIELD, T; DIAZ, R; CARPENTER, L	ANDEEP III	-62.3488	-57.9003	-1				ICPMS	SEDIMENTARY	UNKNOWN	UNKNOWN	SILICICLASTIC
PSANDP3-152/9.5		SEDDB	10.1016/j.dsr2.2207.07.007	RECENT DEEP-WATER SEDIMENTATION, TRACE METAL AND RADIOISOTOPE GEOCHEMISTRY ACROSS THE SOUTHERN OCEAN AND NORTHERN WEDELL SEA, ANTARCTICA	DEEP SEA RESEARCH	HOWE, J; WILSON, C; SHIMMIELD, T; DIAZ, R; CARPENTER, L	ANDEEP III	-62.3488	-57.9003	-1				ICPMS	SEDIMENTARY	UNKNOWN	UNKNOWN	SILICICLASTIC
PSANDP3-152/50		SEDDB	10.1016/j.dsr2.2207.07.007	RECENT DEEP-WATER SEDIMENTATION, TRACE METAL AND RADIOISOTOPE GEOCHEMISTRY ACROSS THE SOUTHERN OCEAN AND NORTHERN WEDELL SEA, ANTARCTICA	DEEP SEA RESEARCH	HOWE, J; WILSON, C; SHIMMIELD, T; DIAZ, R; CARPENTER, L	ANDEEP III	-62.3488	-57.9003	-1				ICPMS	SEDIMENTARY	UNKNOWN	UNKNOWN	SILICICLASTIC
PSANDP3-153/22		SEDDB	10.1016/j.dsr2.2207.07.007	RECENT DEEP-WATER SEDIMENTATION, TRACE METAL AND RADIOISOTOPE GEOCHEMISTRY ACROSS THE SOUTHERN OCEAN AND NORTHERN WEDELL SEA, ANTARCTICA	DEEP SEA RESEARCH	HOWE, J; WILSON, C; SHIMMIELD, T; DIAZ, R; CARPENTER, L	ANDEEP III	-63.3403	-64.6132	-1				ICPMS	SEDIMENTARY	UNKNOWN	UNKNOWN	SILICICLASTIC
PSANDP3-080/0.25		SEDDB	10.1016/j.dsr2.2207.07.007	RECENT DEEP-WATER SEDIMENTATION, TRACE METAL AND RADIOISOTOPE GEOCHEMISTRY ACROSS THE SOUTHERN OCEAN AND NORTHERN WEDELL SEA, ANTARCTICA	DEEP SEA RESEARCH	HOWE, J; WILSON, C; SHIMMIELD, T; DIAZ, R; CARPENTER, L	ANDEEP III	-70.6606	-14.7245	-1				ICPMS	SEDIMENTARY	UNKNOWN	UNKNOWN	SILICICLASTIC
PSANDP3-080/3.75		SEDDB	10.1016/j.dsr2.2207.07.007	RECENT DEEP-WATER SEDIMENTATION, TRACE METAL AND RADIOISOTOPE GEOCHEMISTRY ACROSS THE SOUTHERN OCEAN AND NORTHERN WEDELL SEA, ANTARCTICA	DEEP SEA RESEARCH	HOWE, J; WILSON, C; SHIMMIELD, T; DIAZ, R; CARPENTER, L	ANDEEP III	-70.6606	-14.7245	-1				ICPMS	SEDIMENTARY	UNKNOWN	UNKNOWN	SILICICLASTIC
PSANDP3-080/4.75		SEDDB	10.1016/j.dsr2.2207.07.007	RECENT DEEP-WATER SEDIMENTATION, TRACE METAL AND RADIOISOTOPE GEOCHEMISTRY ACROSS THE SOUTHERN OCEAN AND NORTHERN WEDELL SEA, ANTARCTICA	DEEP SEA RESEARCH	HOWE, J; WILSON, C; SHIMMIELD, T; DIAZ, R; CARPENTER, L	ANDEEP III	-70.6606	-14.7245	-1				ICPMS	SEDIMENTARY	UNKNOWN	UNKNOWN	SILICICLASTIC
PSANDP3-080/5.5		SEDDB	10.1016/j.dsr2.2207.07.007	RECENT DEEP-WATER SEDIMENTATION, TRACE METAL AND RADIOISOTOPE GEOCHEMISTRY ACROSS THE SOUTHERN OCEAN AND NORTHERN WEDELL SEA, ANTARCTICA	DEEP SEA RESEARCH	HOWE, J; WILSON, C; SHIMMIELD, T; DIAZ, R; CARPENTER, L	ANDEEP III	-70.6606	-14.7245	-1				ICPMS	SEDIMENTARY	UNKNOWN	UNKNOWN	SILICICLASTIC
PSANDP3-080/8.5		SEDDB	10.1016/j.dsr2.2207.07.007	RECENT DEEP-WATER SEDIMENTATION, TRACE METAL AND RADIOISOTOPE GEOCHEMISTRY ACROSS THE SOUTHERN OCEAN AND NORTHERN WEDELL SEA, ANTARCTICA	DEEP SEA RESEARCH	HOWE, J; WILSON, C; SHIMMIELD, T; DIAZ, R; CARPENTER, L	ANDEEP III	-70.6606	-14.7245	-1				ICPMS	SEDIMENTARY	UNKNOWN	UNKNOWN	SILICICLASTIC
PSANDP3-152/5.5		SEDDB	10.1016/j.dsr2.2207.07.007	RECENT DEEP-WATER SEDIMENTATION, TRACE METAL AND RADIOISOTOPE GEOCHEMISTRY ACROSS THE SOUTHERN OCEAN AND NORTHERN WEDELL SEA, ANTARCTICA	DEEP SEA RESEARCH	HOWE, J; WILSON, C; SHIMMIELD, T; DIAZ, R; CARPENTER, L	ANDEEP III	-62.3488	-57.9003	-1				ICPMS	SEDIMENTARY	UNKNOWN	UNKNOWN	SILICICLASTIC
PSANDP3-152/13.5		SEDDB	10.1016/j.dsr2.2207.07.007	RECENT DEEP-WATER SEDIMENTATION, TRACE METAL AND RADIOISOTOPE GEOCHEMISTRY ACROSS THE SOUTHERN OCEAN AND NORTHERN WEDELL SEA, ANTARCTICA	DEEP SEA RESEARCH	HOWE, J; WILSON, C; SHIMMIELD, T; DIAZ, R; CARPENTER, L	ANDEEP III	-62.3488	-57.9003	-1				ICPMS	SEDIMENTARY	UNKNOWN	UNKNOWN	SILICICLASTIC
PSANDP3-152/18		SEDDB	10.1016/j.dsr2.2207.07.007	RECENT DEEP-WATER SEDIMENTATION, TRACE METAL AND RADIOISOTOPE GEOCHEMISTRY ACROSS THE SOUTHERN OCEAN AND NORTHERN WEDELL SEA, ANTARCTICA	DEEP SEA RESEARCH	HOWE, J; WILSON, C; SHIMMIELD, T; DIAZ, R; CARPENTER, L	ANDEEP III	-62.3488	-57.9003	-1				ICPMS	SEDIMENTARY	UNKNOWN	UNKNOWN	SILICICLASTIC
PSANDP3-152/36		SEDDB	10.1016/j.dsr2.2207.07.007	RECENT DEEP-WATER SEDIMENTATION, TRACE METAL AND RADIOISOTOPE GEOCHEMISTRY ACROSS THE SOUTHERN OCEAN AND NORTHERN WEDELL SEA, ANTARCTICA	DEEP SEA RESEARCH	HOWE, J; WILSON, C; SHIMMIELD, T; DIAZ, R; CARPENTER, L	ANDEEP III	-62.3488	-57.9003	-1				ICPMS	SEDIMENTARY	UNKNOWN	UNKNOWN	SILICICLASTIC
PSANDP3-152/42		SEDDB	10.1016/j.dsr2.2207.07.007	RECENT DEEP-WATER SEDIMENTATION, TRACE METAL AND RADIOISOTOPE GEOCHEMISTRY ACROSS THE SOUTHERN OCEAN AND NORTHERN WEDELL SEA, ANTARCTICA	DEEP SEA RESEARCH	HOWE, J; WILSON, C; SHIMMIELD, T; DIAZ, R; CARPENTER, L	ANDEEP III	-62.3488	-57.9003	-1				ICPMS	SEDIMENTARY	UNKNOWN	UNKNOWN	SILICICLASTIC
PSANDP3-153/0.25		SEDDB	10.1016/j.dsr2.2207.07.007	RECENT DEEP-WATER SEDIMENTATION, TRACE METAL AND RADIOISOTOPE GEOCHEMISTRY ACROSS THE SOUTHERN OCEAN AND NORTHERN WEDELL SEA, ANTARCTICA	DEEP SEA RESEARCH	HOWE, J; WILSON, C; SHIMMIELD, T; DIAZ, R; CARPENTER, L	ANDEEP III	-63.3403	-64.6132	-1				ICPMS	SEDIMENTARY	UNKNOWN	UNKNOWN	SILICICLASTIC
PSANDP3-153/16		SEDDB	10.1016/j.dsr2.2207.07.007	RECENT DEEP-WATER SEDIMENTATION, TRACE METAL AND RADIOISOTOPE GEOCHEMISTRY ACROSS THE SOUTHERN OCEAN AND NORTHERN WEDELL SEA, ANTARCTICA	DEEP SEA RESEARCH	HOWE, J; WILSON, C; SHIMMIELD, T; DIAZ, R; CARPENTER, L	ANDEEP III	-63.3403	-64.6132	-1				ICPMS	SEDIMENTARY	UNKNOWN	UNKNOWN	SILICICLASTIC
PSANDP3-153/24		SEDDB	10.1016/j.dsr2.2207.07.007	RECENT DEEP-WATER SEDIMENTATION, TRACE METAL AND RADIOISOTOPE GEOCHEMISTRY ACROSS THE SOUTHERN OCEAN AND NORTHERN WEDELL SEA, ANTARCTICA	DEEP SEA RESEARCH	HOWE, J; WILSON, C; SHIMMIELD, T; DIAZ, R; CARPENTER, L	ANDEEP III	-63.3403	-64.6132	-1				ICPMS	SEDIMENTARY	UNKNOWN	UNKNOWN	SILICICLASTIC
PSANDP3-021/0.75		SEDDB	10.1016/j.dsr2.2207.07.007	RECENT DEEP-WATER SEDIMENTATION, TRACE METAL AND RADIOISOTOPE GEOCHEMISTRY ACROSS THE SOUTHERN OCEAN AND NORTHERN WEDELL SEA, ANTARCTICA	DEEP SEA RESEARCH	HOWE, J; WILSON, C; SHIMMIELD, T; DIAZ, R; CARPENTER, L	ANDEEP III	-47.6573	4.2608	-1				ICPMS	SEDIMENTARY	UNKNOWN	UNKNOWN	SILICICLASTIC
PSANDP3-021/1.75		SEDDB	10.1016/j.dsr2.2207.07.007	RECENT DEEP-WATER SEDIMENTATION, TRACE METAL AND RADIOISOTOPE GEOCHEMISTRY ACROSS THE SOUTHERN OCEAN AND NORTHERN WEDELL SEA, ANTARCTICA	DEEP SEA RESEARCH	HOWE, J; WILSON, C; SHIMMIELD, T; DIAZ, R; CARPENTER, L	ANDEEP III	-47.6573	4.2608	-1				ICPMS	SEDIMENTARY	UNKNOWN	UNKNOWN	SILICICLASTIC
PSANDP3-021/2.25		SEDDB	10.1016/j.dsr2.2207.07.007	RECENT DEEP-WATER SEDIMENTATION, TRACE METAL AND RADIOISOTOPE GEOCHEMISTRY ACROSS THE SOUTHERN OCEAN AND NORTHERN WEDELL SEA, ANTARCTICA	DEEP SEA RESEARCH	HOWE, J; WILSON, C; SHIMMIELD, T; DIAZ, R; CARPENTER, L	ANDEEP III	-47.6573	4.2608	-1				ICPMS	SEDIMENTARY	UNKNOWN	UNKNOWN	SILICICLASTIC
PSANDP3-021/6.5		SEDDB	10.1016/j.dsr2.2207.07.007	RECENT DEEP-WATER SEDIMENTATION, TRACE METAL AND RADIOISOTOPE GEOCHEMISTRY ACROSS THE SOUTHERN OCEAN AND NORTHERN WEDELL SEA, ANTARCTICA	DEEP SEA RESEARCH	HOWE, J; WILSON, C; SHIMMIELD, T; DIAZ, R; CARPENTER, L	ANDEEP III	-47.6573	4.2608	-1				ICPMS	SEDIMENTARY	UNKNOWN	UNKNOWN	SILICICLASTIC
PSANDP3-021/24		SEDDB	10.1016/j.dsr2.2207.07.007	RECENT DEEP-WATER SEDIMENTATION, TRACE METAL AND RADIOISOTOPE GEOCHEMISTRY ACROSS THE SOUTHERN OCEAN AND NORTHERN WEDELL SEA, ANTARCTICA	DEEP SEA RESEARCH	HOWE, J; WILSON, C; SHIMMIELD, T; DIAZ, R; CARPENTER, L	ANDEEP III	-47.6573	4.2608	-1				ICPMS	SEDIMENTARY	UNKNOWN	UNKNOWN	SILICICLASTIC
PSANDP3-080/4.25		SEDDB	10.1016/j.dsr2.2207.07.007	RECENT DEEP-WATER SEDIMENTATION, TRACE METAL AND RADIOISOTOPE GEOCHEMISTRY ACROSS THE SOUTHERN OCEAN AND NORTHERN WEDELL SEA, ANTARCTICA	DEEP SEA RESEARCH	HOWE, J; WILSON, C; SHIMMIELD, T; DIAZ, R; CARPENTER, L	ANDEEP III	-70.6606	-14.7245	-1				ICPMS	SEDIMENTARY	UNKNOWN	UNKNOWN	SILICICLASTIC
PSANDP3-152/0.5		SEDDB	10.1016/j.dsr2.2207.07.007	RECENT DEEP-WATER SEDIMENTATION, TRACE METAL AND RADIOISOTOPE GEOCHEMISTRY ACROSS THE SOUTHERN OCEAN AND NORTHERN WEDELL SEA, ANTARCTICA	DEEP SEA RESEARCH	HOWE, J; WILSON, C; SHIMMIELD, T; DIAZ, R; CARPENTER, L	ANDEEP III	-62.3488	-57.9003	-1				ICPMS	SEDIMENTARY	UNKNOWN	UNKNOWN	SILICICLASTIC
PSANDP3-152/3.5		SEDDB	10.1016/j.dsr2.2207.07.007	RECENT DEEP-WATER SEDIMENTATION, TRACE METAL AND RADIOISOTOPE GEOCHEMISTRY ACROSS THE SOUTHERN OCEAN AND NORTHERN WEDELL SEA, ANTARCTICA	DEEP SEA RESEARCH	HOWE, J; WILSON, C; SHIMMIELD, T; DIAZ, R; CARPENTER, L	ANDEEP III	-62.3488	-57.9003	-1				ICPMS	SEDIMENTARY	UNKNOWN	UNKNOWN	SILICICLASTIC
PSANDP3-152/32		SEDDB	10.1016/j.dsr2.2207.07.007	RECENT DEEP-WATER SEDIMENTATION, TRACE METAL AND RADIOISOTOPE GEOCHEMISTRY ACROSS THE SOUTHERN OCEAN AND NORTHERN WEDELL SEA, ANTARCTICA	DEEP SEA RESEARCH	HOWE, J; WILSON, C; SHIMMIELD, T; DIAZ, R; CARPENTER, L	ANDEEP III	-62.3488	-57.9003	-1				ICPMS	SEDIMENTARY	UNKNOWN	UNKNOWN	SILICICLASTIC
PSANDP3-152/40		SEDDB	10.1016/j.dsr2.2207.07.007	RECENT DEEP-WATER SEDIMENTATION, TRACE METAL AND RADIOISOTOPE GEOCHEMISTRY ACROSS THE SOUTHERN OCEAN AND NORTHERN WEDELL SEA, ANTARCTICA	DEEP SEA RESEARCH	HOWE, J; WILSON, C; SHIMMIELD, T; DIAZ, R; CARPENTER, L	ANDEEP III	-62.3488	-57.9003	-1				ICPMS	SEDIMENTARY	UNKNOWN	UNKNOWN	SILICICLASTIC
PSANDP3-153/0.75		SEDDB	10.1016/j.dsr2.2207.07.007	RECENT DEEP-WATER SEDIMENTATION, TRACE METAL AND RADIOISOTOPE GEOCHEMISTRY ACROSS THE SOUTHERN OCEAN AND NORTHERN WEDELL SEA, ANTARCTICA	DEEP SEA RESEARCH	HOWE, J; WILSON, C; SHIMMIELD, T; DIAZ, R; CARPENTER, L	ANDEEP III	-63.3403	-64.6132	-1				ICPMS	SEDIMENTARY	UNKNOWN	UNKNOWN	SILICICLASTIC
PSANDP3-153/2.75		SEDDB	10.1016/j.dsr2.2207.07.007	RECENT DEEP-WATER SEDIMENTATION, TRACE METAL AND RADIOISOTOPE GEOCHEMISTRY ACROSS THE SOUTHERN OCEAN AND NORTHERN WEDELL SEA, ANTARCTICA	DEEP SEA RESEARCH	HOWE, J; WILSON, C; SHIMMIELD, T; DIAZ, R; CARPENTER, L	ANDEEP III	-63.3403	-64.6132	-1				ICPMS	SEDIMENTARY	UNKNOWN	UNKNOWN	SILICICLASTIC
PSANDP3-153/5.5		SEDDB	10.1016/j.dsr2.2207.07.007	RECENT DEEP-WATER SEDIMENTATION, TRACE METAL AND RADIOISOTOPE GEOCHEMISTRY ACROSS THE SOUTHERN OCEAN AND NORTHERN WEDELL SEA, ANTARCTICA	DEEP SEA RESEARCH	HOWE, J; WILSON, C; SHIMMIELD, T; DIAZ, R; CARPENTER, L	ANDEEP III	-63.3403	-64.6132	-1				ICPMS	SEDIMENTARY	UNKNOWN	UNKNOWN	SILICICLASTIC
PSANDP3-153/8.5		SEDDB	10.1016/j.dsr2.2207.07.007	RECENT DEEP-WATER SEDIMENTATION, TRACE METAL AND RADIOISOTOPE GEOCHEMISTRY ACROSS THE SOUTHERN OCEAN AND NORTHERN WEDELL SEA, ANTARCTICA	DEEP SEA RESEARCH	HOWE, J; WILSON, C; SHIMMIELD, T; DIAZ, R; CARPENTER, L	ANDEEP III	-63.3403	-64.6132	-1				ICPMS	SEDIMENTARY	UNKNOWN	UNKNOWN	SILICICLASTIC
ARGSHLF-1518-SAMPLE		SEDDB	10.1016/j.margeo.2007.11.007	Nd AND Pb ISOTOPE SIGNATURES ON THE SOUTHEASTERN SOUTH AMERICAN UPPER MARGIN: IMPLICATIONS FOR SEDIMENT TRANSPORT AND SOURCE ROCKS	MARINE GEOLOGY	DE MAHIQUES, M; TASSINARI, C; MARCOLINI, S; VIOLANTE, R; FIGUEIRA, R; DA SILVEIRA, I; BURONE, L; DE MELLO E SOUSA, S	UNKNOWN	-46.14	-66.4	-1				TIMS	SEDIMENTARY	UNKNOWN	UNKNOWN	SILICICLASTIC
ARGSHLF-1126-SAMPLE		SEDDB	10.1016/j.margeo.2007.11.007	Nd AND Pb ISOTOPE SIGNATURES ON THE SOUTHEASTERN SOUTH AMERICAN UPPER MARGIN: IMPLICATIONS FOR SEDIMENT TRANSPORT AND SOURCE ROCKS	MARINE GEOLOGY	DE MAHIQUES, M; TASSINARI, C; MARCOLINI, S; VIOLANTE, R; FIGUEIRA, R; DA SILVEIRA, I; BURONE, L; DE MELLO E SOUSA, S	UNKNOWN	-41.2	-58.43	-1				TIMS	SEDIMENTARY	UNKNOWN	UNKNOWN	SILICICLASTIC
RDLPTAEST-K-SAMPLE		SEDDB	10.1016/j.margeo.2007.11.007	Nd AND Pb ISOTOPE SIGNATURES ON THE SOUTHEASTERN SOUTH AMERICAN UPPER MARGIN: IMPLICATIONS FOR SEDIMENT TRANSPORT AND SOURCE ROCKS	MARINE GEOLOGY	DE MAHIQUES, M; TASSINARI, C; MARCOLINI, S; VIOLANTE, R; FIGUEIRA, R; DA SILVEIRA, I; BURONE, L; DE MELLO E SOUSA, S	UNKNOWN	-34.94	-56.21	-1				TIMS	SEDIMENTARY	UNKNOWN	UNKNOWN	SILICICLASTIC
SBRAZIL-6630-SAMPLE		SEDDB	10.1016/j.margeo.2007.11.007	Nd AND Pb ISOTOPE SIGNATURES ON THE SOUTHEASTERN SOUTH AMERICAN UPPER MARGIN: IMPLICATIONS FOR SEDIMENT TRANSPORT AND SOURCE ROCKS	MARINE GEOLOGY	DE MAHIQUES, M; TASSINARI, C; MARCOLINI, S; VIOLANTE, R; FIGUEIRA, R; DA SILVEIRA, I; BURONE, L; DE MELLO E SOUSA, S	UNKNOWN	-25.82	-45.3	-1				TIMS	SEDIMENTARY	UNKNOWN	UNKNOWN	SILICICLASTIC
SEBRAZIL-6541-SAMPLE		SEDDB	10.1016/j.margeo.2007.11.007	Nd AND Pb ISOTOPE SIGNATURES ON THE SOUTHEASTERN SOUTH AMERICAN UPPER MARGIN: IMPLICATIONS FOR SEDIMENT TRANSPORT AND SOURCE ROCKS	MARINE GEOLOGY	DE MAHIQUES, M; TASSINARI, C; MARCOLINI, S; VIOLANTE, R; FIGUEIRA, R; DA SILVEIRA, I; BURONE, L; DE MELLO E SOUSA, S	UNKNOWN	-23.6	-41.71	-1				TIMS	SEDIMENTARY	UNKNOWN	UNKNOWN	SILICICLASTIC
RDLPTAEST-P-SAMPLE		SEDDB	10.1016/j.margeo.2007.11.007	Nd AND Pb ISOTOPE SIGNATURES ON THE SOUTHEASTERN SOUTH AMERICAN UPPER MARGIN: IMPLICATIONS FOR SEDIMENT TRANSPORT AND SOURCE ROCKS	MARINE GEOLOGY	DE MAHIQUES, M; TASSINARI, C; MARCOLINI, S; VIOLANTE, R; FIGUEIRA, R; DA SILVEIRA, I; BURONE, L; DE MELLO E SOUSA, S	UNKNOWN	-34.97	-56.15	-1				TIMS	SEDIMENTARY	UNKNOWN	UNKNOWN	SILICICLASTIC
SBRAZIL-6834-SAMPLE		SEDDB	10.1016/j.margeo.2007.11.007	Nd AND Pb ISOTOPE SIGNATURES ON THE SOUTHEASTERN SOUTH AMERICAN UPPER MARGIN: IMPLICATIONS FOR SEDIMENT TRANSPORT AND SOURCE ROCKS	MARINE GEOLOGY	DE MAHIQUES, M; TASSINARI, C; MARCOLINI, S; VIOLANTE, R; FIGUEIRA, R; DA SILVEIRA, I; BURONE, L; DE MELLO E SOUSA, S	UNKNOWN	-33.58	-50.69	-1				TIMS	SEDIMENTARY	UNKNOWN	UNKNOWN	SILICICLASTIC
SEBRAZIL-6664-SAMPLE		SEDDB	10.1016/j.margeo.2007.11.007	Nd AND Pb ISOTOPE SIGNATURES ON THE SOUTHEASTERN SOUTH AMERICAN UPPER MARGIN: IMPLICATIONS FOR SEDIMENT TRANSPORT AND SOURCE ROCKS	MARINE GEOLOGY	DE MAHIQUES, M; TASSINARI, C; MARCOLINI, S; VIOLANTE, R; FIGUEIRA, R; DA SILVEIRA, I; BURONE, L; DE MELLO E SOUSA, S	UNKNOWN	-25.19	-44.17	-1				TIMS	SEDIMENTARY	UNKNOWN	UNKNOWN	SILICICLASTIC
SEBRAZIL-6752-SAMPLE		SEDDB	10.1016/j.margeo.2007.11.007	Nd AND Pb ISOTOPE SIGNATURES ON THE SOUTHEASTERN SOUTH AMERICAN UPPER MARGIN: IMPLICATIONS FOR SEDIMENT TRANSPORT AND SOURCE ROCKS	MARINE GEOLOGY	DE MAHIQUES, M; TASSINARI, C; MARCOLINI, S; VIOLANTE, R; FIGUEIRA, R; DA SILVEIRA, I; BURONE, L; DE MELLO E SOUSA, S	UNKNOWN	-23.73	-42.11	-1				TIMS	SEDIMENTARY	UNKNOWN	UNKNOWN	SILICICLASTIC
SEBRAZIL-6773-SAMPLE		SEDDB	10.1016/j.margeo.2007.11.007	Nd AND Pb ISOTOPE SIGNATURES ON THE SOUTHEASTERN SOUTH AMERICAN UPPER MARGIN: IMPLICATIONS FOR SEDIMENT TRANSPORT AND SOURCE ROCKS	MARINE GEOLOGY	DE MAHIQUES, M; TASSINARI, C; MARCOLINI, S; VIOLANTE, R; FIGUEIRA, R; DA SILVEIRA, I; BURONE, L; DE MELLO E SOUSA, S	UNKNOWN	-21.82	-40.03	-1				TIMS	SEDIMENTARY	UNKNOWN	UNKNOWN	SILICICLASTIC
RDLPTAEST-221-SAMPLE		SEDDB	10.1016/j.margeo.2007.11.007	Nd AND Pb ISOTOPE SIGNATURES ON THE SOUTHEASTERN SOUTH AMERICAN UPPER MARGIN: IMPLICATIONS FOR SEDIMENT TRANSPORT AND SOURCE ROCKS	MARINE GEOLOGY	DE MAHIQUES, M; TASSINARI, C; MARCOLINI, S; VIOLANTE, R; FIGUEIRA, R; DA SILVEIRA, I; BURONE, L; DE MELLO E SOUSA, S	UNKNOWN	-35.02	-55.7	-1				TIMS	SEDIMENTARY	UNKNOWN	UNKNOWN	SILICICLASTIC
RDLPTAEST-163-SAMPLE		SEDDB	10.1016/j.margeo.2007.11.007	Nd AND Pb ISOTOPE SIGNATURES ON THE SOUTHEASTERN SOUTH AMERICAN UPPER MARGIN: IMPLICATIONS FOR SEDIMENT TRANSPORT AND SOURCE ROCKS	MARINE GEOLOGY	DE MAHIQUES, M; TASSINARI, C; MARCOLINI, S; VIOLANTE, R; FIGUEIRA, R; DA SILVEIRA, I; BURONE, L; DE MELLO E SOUSA, S	UNKNOWN	-34.7	-57.03	-1				TIMS	SEDIMENTARY	UNKNOWN	UNKNOWN	SILICICLASTIC
SBRAZIL-6836-SAMPLE		SEDDB	10.1016/j.margeo.2007.11.007	Nd AND Pb ISOTOPE SIGNATURES ON THE SOUTHEASTERN SOUTH AMERICAN UPPER MARGIN: IMPLICATIONS FOR SEDIMENT TRANSPORT AND SOURCE ROCKS	MARINE GEOLOGY	DE MAHIQUES, M; TASSINARI, C; MARCOLINI, S; VIOLANTE, R; FIGUEIRA, R; DA SILVEIRA, I; BURONE, L; DE MELLO E SOUSA, S	UNKNOWN	-33.18	-50.85	-1				TIMS	SEDIMENTARY	UNKNOWN	UNKNOWN	SILICICLASTIC
SBRAZIL-6856-SAMPLE		SEDDB	10.1016/j.margeo.2007.11.007	Nd AND Pb ISOTOPE SIGNATURES ON THE SOUTHEASTERN SOUTH AMERICAN UPPER MARGIN: IMPLICATIONS FOR SEDIMENT TRANSPORT AND SOURCE ROCKS	MARINE GEOLOGY	DE MAHIQUES, M; TASSINARI, C; MARCOLINI, S; VIOLANTE, R; FIGUEIRA, R; DA SILVEIRA, I; BURONE, L; DE MELLO E SOUSA, S	UNKNOWN	-30.27	-47.99	-1				TIMS	SEDIMENTARY	UNKNOWN	UNKNOWN	SILICICLASTIC
SBRAZIL-6613-SAMPLE		SEDDB	10.1016/j.margeo.2007.11.007	Nd AND Pb ISOTOPE SIGNATURES ON THE SOUTHEASTERN SOUTH AMERICAN UPPER MARGIN: IMPLICATIONS FOR SEDIMENT TRANSPORT AND SOURCE ROCKS	MARINE GEOLOGY	DE MAHIQUES, M; TASSINARI, C; MARCOLINI, S; VIOLANTE, R; FIGUEIRA, R; DA SILVEIRA, I; BURONE, L; DE MELLO E SOUSA, S	UNKNOWN	-28.17	-47.92	-1				TIMS	SEDIMENTARY	UNKNOWN	UNKNOWN	SILICICLASTIC
SEBRAZIL-6626-SAMPLE		SEDDB	10.1016/j.margeo.2007.11.007	Nd AND Pb ISOTOPE SIGNATURES ON THE SOUTHEASTERN SOUTH AMERICAN UPPER MARGIN: IMPLICATIONS FOR SEDIMENT TRANSPORT AND SOURCE ROCKS	MARINE GEOLOGY	DE MAHIQUES, M; TASSINARI, C; MARCOLINI, S; VIOLANTE, R; FIGUEIRA, R; DA SILVEIRA, I; BURONE, L; DE MELLO E SOUSA, S	UNKNOWN	-24.23	-43.75	-1				TIMS	SEDIMENTARY	UNKNOWN	UNKNOWN	SILICICLASTIC
SEBRAZIL-6742-SAMPLE		SEDDB	10.1016/j.margeo.2007.11.007	Nd AND Pb ISOTOPE SIGNATURES ON THE SOUTHEASTERN SOUTH AMERICAN UPPER MARGIN: IMPLICATIONS FOR SEDIMENT TRANSPORT AND SOURCE ROCKS	MARINE GEOLOGY	DE MAHIQUES, M; TASSINARI, C; MARCOLINI, S; VIOLANTE, R; FIGUEIRA, R; DA SILVEIRA, I; BURONE, L; DE MELLO E SOUSA, S	UNKNOWN	-23.99	-43.16	-1				TIMS	SEDIMENTARY	UNKNOWN	UNKNOWN	SILICICLASTIC
SEBRAZIL-6539-SAMPLE		SEDDB	10.1016/j.margeo.2007.11.007	Nd AND Pb ISOTOPE SIGNATURES ON THE SOUTHEASTERN SOUTH AMERICAN UPPER MARGIN: IMPLICATIONS FOR SEDIMENT TRANSPORT AND SOURCE ROCKS	MARINE GEOLOGY	DE MAHIQUES, M; TASSINARI, C; MARCOLINI, S; VIOLANTE, R; FIGUEIRA, R; DA SILVEIRA, I; BURONE, L; DE MELLO E SOUSA, S	UNKNOWN	-23.08	-41.98	-1				TIMS	SEDIMENTARY	UNKNOWN	UNKNOWN	SILICICLASTIC
ARGSHLF-1509-SAMPLE		SEDDB	10.1016/j.margeo.2007.11.007	Nd AND Pb ISOTOPE SIGNATURES ON THE SOUTHEASTERN SOUTH AMERICAN UPPER MARGIN: IMPLICATIONS FOR SEDIMENT TRANSPORT AND SOURCE ROCKS	MARINE GEOLOGY	DE MAHIQUES, M; TASSINARI, C; MARCOLINI, S; VIOLANTE, R; FIGUEIRA, R; DA SILVEIRA, I; BURONE, L; DE MELLO E SOUSA, S	UNKNOWN	-46.14	-65.03	-1				TIMS	SEDIMENTARY	UNKNOWN	UNKNOWN	SILICICLASTIC
ARGSHLF-575-SAMPLE		SEDDB	10.1016/j.margeo.2007.11.007	Nd AND Pb ISOTOPE SIGNATURES ON THE SOUTHEASTERN SOUTH AMERICAN UPPER MARGIN: IMPLICATIONS FOR SEDIMENT TRANSPORT AND SOURCE ROCKS	MARINE GEOLOGY	DE MAHIQUES, M; TASSINARI, C; MARCOLINI, S; VIOLANTE, R; FIGUEIRA, R; DA SILVEIRA, I; BURONE, L; DE MELLO E SOUSA, S	UNKNOWN	-37.37	-53.8	-1				TIMS	SEDIMENTARY	UNKNOWN	UNKNOWN	SILICICLASTIC
RDLPTAEST-SB26-SAMPLE		SEDDB	10.1016/j.margeo.2007.11.007	Nd AND Pb ISOTOPE SIGNATURES ON THE SOUTHEASTERN SOUTH AMERICAN UPPER MARGIN: IMPLICATIONS FOR SEDIMENT TRANSPORT AND SOURCE ROCKS	MARINE GEOLOGY	DE MAHIQUES, M; TASSINARI, C; MARCOLINI, S; VIOLANTE, R; FIGUEIRA, R; DA SILVEIRA, I; BURONE, L; DE MELLO E SOUSA, S	UNKNOWN	-35.54	-56.81	-1				TIMS	SEDIMENTARY	UNKNOWN	UNKNOWN	SILICICLASTIC
RDLPTAEST-208-SAMPLE		SEDDB	10.1016/j.margeo.2007.11.007	Nd AND Pb ISOTOPE SIGNATURES ON THE SOUTHEASTERN SOUTH AMERICAN UPPER MARGIN: IMPLICATIONS FOR SEDIMENT TRANSPORT AND SOURCE ROCKS	MARINE GEOLOGY	DE MAHIQUES, M; TASSINARI, C; MARCOLINI, S; VIOLANTE, R; FIGUEIRA, R; DA SILVEIRA, I; BURONE, L; DE MELLO E SOUSA, S	UNKNOWN	-35.13	-54.67	-1				TIMS	SEDIMENTARY	UNKNOWN	UNKNOWN	SILICICLASTIC
SBRAZIL-6847-SAMPLE		SEDDB	10.1016/j.margeo.2007.11.007	Nd AND Pb ISOTOPE SIGNATURES ON THE SOUTHEASTERN SOUTH AMERICAN UPPER MARGIN: IMPLICATIONS FOR SEDIMENT TRANSPORT AND SOURCE ROCKS	MARINE GEOLOGY	DE MAHIQUES, M; TASSINARI, C; MARCOLINI, S; VIOLANTE, R; FIGUEIRA, R; DA SILVEIRA, I; BURONE, L; DE MELLO E SOUSA, S	UNKNOWN	-32.32	-50.18	-1				TIMS	SEDIMENTARY	UNKNOWN	UNKNOWN	SILICICLASTIC
SBRAZIL-6846-SAMPLE		SEDDB	10.1016/j.margeo.2007.11.007	Nd AND Pb ISOTOPE SIGNATURES ON THE SOUTHEASTERN SOUTH AMERICAN UPPER MARGIN: IMPLICATIONS FOR SEDIMENT TRANSPORT AND SOURCE ROCKS	MARINE GEOLOGY	DE MAHIQUES, M; TASSINARI, C; MARCOLINI, S; VIOLANTE, R; FIGUEIRA, R; DA SILVEIRA, I; BURONE, L; DE MELLO E SOUSA, S	UNKNOWN	-32.21	-50.45	-1				TIMS	SEDIMENTARY	UNKNOWN	UNKNOWN	SILICICLASTIC
SBRAZIL-6692-SAMPLE		SEDDB	10.1016/j.margeo.2007.11.007	Nd AND Pb ISOTOPE SIGNATURES ON THE SOUTHEASTERN SOUTH AMERICAN UPPER MARGIN: IMPLICATIONS FOR SEDIMENT TRANSPORT AND SOURCE ROCKS	MARINE GEOLOGY	DE MAHIQUES, M; TASSINARI, C; MARCOLINI, S; VIOLANTE, R; FIGUEIRA, R; DA SILVEIRA, I; BURONE, L; DE MELLO E SOUSA, S	UNKNOWN	-25.84	-46.95	-1				TIMS	SEDIMENTARY	UNKNOWN	UNKNOWN	SILICICLASTIC
SBRAZIL-6700-SAMPLE		SEDDB	10.1016/j.margeo.2007.11.007	Nd AND Pb ISOTOPE SIGNATURES ON THE SOUTHEASTERN SOUTH AMERICAN UPPER MARGIN: IMPLICATIONS FOR SEDIMENT TRANSPORT AND SOURCE ROCKS	MARINE GEOLOGY	DE MAHIQUES, M; TASSINARI, C; MARCOLINI, S; VIOLANTE, R; FIGUEIRA, R; DA SILVEIRA, I; BURONE, L; DE MELLO E SOUSA, S	UNKNOWN	-25.42	-46.37	-1				TIMS	SEDIMENTARY	UNKNOWN	UNKNOWN	SILICICLASTIC
SEBRAZIL-6669-SAMPLE		SEDDB	10.1016/j.margeo.2007.11.007	Nd AND Pb ISOTOPE SIGNATURES ON THE SOUTHEASTERN SOUTH AMERICAN UPPER MARGIN: IMPLICATIONS FOR SEDIMENT TRANSPORT AND SOURCE ROCKS	MARINE GEOLOGY	DE MAHIQUES, M; TASSINARI, C; MARCOLINI, S; VIOLANTE, R; FIGUEIRA, R; DA SILVEIRA, I; BURONE, L; DE MELLO E SOUSA, S	UNKNOWN	-24.13	-44.71	-1				TIMS	SEDIMENTARY	UNKNOWN	UNKNOWN	SILICICLASTIC
SEBRAZIL-6542-SAMPLE		SEDDB	10.1016/j.margeo.2007.11.007	Nd AND Pb ISOTOPE SIGNATURES ON THE SOUTHEASTERN SOUTH AMERICAN UPPER MARGIN: IMPLICATIONS FOR SEDIMENT TRANSPORT AND SOURCE ROCKS	MARINE GEOLOGY	DE MAHIQUES, M; TASSINARI, C; MARCOLINI, S; VIOLANTE, R; FIGUEIRA, R; DA SILVEIRA, I; BURONE, L; DE MELLO E SOUSA, S	UNKNOWN	-23.95	-41.61	-1				TIMS	SEDIMENTARY	UNKNOWN	UNKNOWN	SILICICLASTIC
RDLPTAEST-T-SAMPLE		SEDDB	10.1016/j.margeo.2007.11.007	Nd AND Pb ISOTOPE SIGNATURES ON THE SOUTHEASTERN SOUTH AMERICAN UPPER MARGIN: IMPLICATIONS FOR SEDIMENT TRANSPORT AND SOURCE ROCKS	MARINE GEOLOGY	DE MAHIQUES, M; TASSINARI, C; MARCOLINI, S; VIOLANTE, R; FIGUEIRA, R; DA SILVEIRA, I; BURONE, L; DE MELLO E SOUSA, S	UNKNOWN	-34.94	-56.33	-1				TIMS	SEDIMENTARY	UNKNOWN	UNKNOWN	SILICICLASTIC
SBRAZIL-6837-SAMPLE		SEDDB	10.1016/j.margeo.2007.11.007	Nd AND Pb ISOTOPE SIGNATURES ON THE SOUTHEASTERN SOUTH AMERICAN UPPER MARGIN: IMPLICATIONS FOR SEDIMENT TRANSPORT AND SOURCE ROCKS	MARINE GEOLOGY	DE MAHIQUES, M; TASSINARI, C; MARCOLINI, S; VIOLANTE, R; FIGUEIRA, R; DA SILVEIRA, I; BURONE, L; DE MELLO E SOUSA, S	UNKNOWN	-33.18	-50.85	-1				TIMS	SEDIMENTARY	UNKNOWN	UNKNOWN	SILICICLASTIC
SBRAZIL-6844-SAMPLE		SEDDB	10.1016/j.margeo.2007.11.007	Nd AND Pb ISOTOPE SIGNATURES ON THE SOUTHEASTERN SOUTH AMERICAN UPPER MARGIN: IMPLICATIONS FOR SEDIMENT TRANSPORT AND SOURCE ROCKS	MARINE GEOLOGY	DE MAHIQUES, M; TASSINARI, C; MARCOLINI, S; VIOLANTE, R; FIGUEIRA, R; DA SILVEIRA, I; BURONE, L; DE MELLO E SOUSA, S	UNKNOWN	-32.35	-50.45	-1				TIMS	SEDIMENTARY	UNKNOWN	UNKNOWN	SILICICLASTIC
SBRAZIL-6852-SAMPLE		SEDDB	10.1016/j.margeo.2007.11.007	Nd AND Pb ISOTOPE SIGNATURES ON THE SOUTHEASTERN SOUTH AMERICAN UPPER MARGIN: IMPLICATIONS FOR SEDIMENT TRANSPORT AND SOURCE ROCKS	MARINE GEOLOGY	DE MAHIQUES, M; TASSINARI, C; MARCOLINI, S; VIOLANTE, R; FIGUEIRA, R; DA SILVEIRA, I; BURONE, L; DE MELLO E SOUSA, S	UNKNOWN	-31.49	-50.4	-1				TIMS	SEDIMENTARY	UNKNOWN	UNKNOWN	SILICICLASTIC
SBRAZIL-6858-SAMPLE		SEDDB	10.1016/j.margeo.2007.11.007	Nd AND Pb ISOTOPE SIGNATURES ON THE SOUTHEASTERN SOUTH AMERICAN UPPER MARGIN: IMPLICATIONS FOR SEDIMENT TRANSPORT AND SOURCE ROCKS	MARINE GEOLOGY	DE MAHIQUES, M; TASSINARI, C; MARCOLINI, S; VIOLANTE, R; FIGUEIRA, R; DA SILVEIRA, I; BURONE, L; DE MELLO E SOUSA, S	UNKNOWN	-30	-49	-1				TIMS	SEDIMENTARY	UNKNOWN	UNKNOWN	SILICICLASTIC
SBRAZIL-6611-SAMPLE		SEDDB	10.1016/j.margeo.2007.11.007	Nd AND Pb ISOTOPE SIGNATURES ON THE SOUTHEASTERN SOUTH AMERICAN UPPER MARGIN: IMPLICATIONS FOR SEDIMENT TRANSPORT AND SOURCE ROCKS	MARINE GEOLOGY	DE MAHIQUES, M; TASSINARI, C; MARCOLINI, S; VIOLANTE, R; FIGUEIRA, R; DA SILVEIRA, I; BURONE, L; DE MELLO E SOUSA, S	UNKNOWN	-28.41	-47.36	-1				TIMS	SEDIMENTARY	UNKNOWN	UNKNOWN	SILICICLASTIC
SBRAZIL-6652-SAMPLE		SEDDB	10.1016/j.margeo.2007.11.007	Nd AND Pb ISOTOPE SIGNATURES ON THE SOUTHEASTERN SOUTH AMERICAN UPPER MARGIN: IMPLICATIONS FOR SEDIMENT TRANSPORT AND SOURCE ROCKS	MARINE GEOLOGY	DE MAHIQUES, M; TASSINARI, C; MARCOLINI, S; VIOLANTE, R; FIGUEIRA, R; DA SILVEIRA, I; BURONE, L; DE MELLO E SOUSA, S	UNKNOWN	-25.85	-45.8	-1				TIMS	SEDIMENTARY	UNKNOWN	UNKNOWN	SILICICLASTIC
SBRAZIL-6704-SAMPLE		SEDDB	10.1016/j.margeo.2007.11.007	Nd AND Pb ISOTOPE SIGNATURES ON THE SOUTHEASTERN SOUTH AMERICAN UPPER MARGIN: IMPLICATIONS FOR SEDIMENT TRANSPORT AND SOURCE ROCKS	MARINE GEOLOGY	DE MAHIQUES, M; TASSINARI, C; MARCOLINI, S; VIOLANTE, R; FIGUEIRA, R; DA SILVEIRA, I; BURONE, L; DE MELLO E SOUSA, S	UNKNOWN	-25.24	-46.05	-1				TIMS	SEDIMENTARY	UNKNOWN	UNKNOWN	SILICICLASTIC
SEBRAZIL-6554-SAMPLE		SEDDB	10.1016/j.margeo.2007.11.007	Nd AND Pb ISOTOPE SIGNATURES ON THE SOUTHEASTERN SOUTH AMERICAN UPPER MARGIN: IMPLICATIONS FOR SEDIMENT TRANSPORT AND SOURCE ROCKS	MARINE GEOLOGY	DE MAHIQUES, M; TASSINARI, C; MARCOLINI, S; VIOLANTE, R; FIGUEIRA, R; DA SILVEIRA, I; BURONE, L; DE MELLO E SOUSA, S	UNKNOWN	-23.89	-42.76	-1				TIMS	SEDIMENTARY	UNKNOWN	UNKNOWN	SILICICLASTIC
RDLPTAEST-192-SAMPLE		SEDDB	10.1016/j.margeo.2007.11.007	Nd AND Pb ISOTOPE SIGNATURES ON THE SOUTHEASTERN SOUTH AMERICAN UPPER MARGIN: IMPLICATIONS FOR SEDIMENT TRANSPORT AND SOURCE ROCKS	MARINE GEOLOGY	DE MAHIQUES, M; TASSINARI, C; MARCOLINI, S; VIOLANTE, R; FIGUEIRA, R; DA SILVEIRA, I; BURONE, L; DE MELLO E SOUSA, S	UNKNOWN	-35.22	-56.89	-1				TIMS	SEDIMENTARY	UNKNOWN	UNKNOWN	SILICICLASTIC
SBRAZIL-6814-SAMPLE		SEDDB	10.1016/j.margeo.2007.11.007	Nd AND Pb ISOTOPE SIGNATURES ON THE SOUTHEASTERN SOUTH AMERICAN UPPER MARGIN: IMPLICATIONS FOR SEDIMENT TRANSPORT AND SOURCE ROCKS	MARINE GEOLOGY	DE MAHIQUES, M; TASSINARI, C; MARCOLINI, S; VIOLANTE, R; FIGUEIRA, R; DA SILVEIRA, I; BURONE, L; DE MELLO E SOUSA, S	UNKNOWN	-29.25	-48.7	-1				TIMS	SEDIMENTARY	UNKNOWN	UNKNOWN	SILICICLASTIC
SEBRAZIL-6683-SAMPLE		SEDDB	10.1016/j.margeo.2007.11.007	Nd AND Pb ISOTOPE SIGNATURES ON THE SOUTHEASTERN SOUTH AMERICAN UPPER MARGIN: IMPLICATIONS FOR SEDIMENT TRANSPORT AND SOURCE ROCKS	MARINE GEOLOGY	DE MAHIQUES, M; TASSINARI, C; MARCOLINI, S; VIOLANTE, R; FIGUEIRA, R; DA SILVEIRA, I; BURONE, L; DE MELLO E SOUSA, S	UNKNOWN	-25.06	-45.54	-1				TIMS	SEDIMENTARY	UNKNOWN	UNKNOWN	SILICICLASTIC
SEBRAZIL-6553-SAMPLE		SEDDB	10.1016/j.margeo.2007.11.007	Nd AND Pb ISOTOPE SIGNATURES ON THE SOUTHEASTERN SOUTH AMERICAN UPPER MARGIN: IMPLICATIONS FOR SEDIMENT TRANSPORT AND SOURCE ROCKS	MARINE GEOLOGY	DE MAHIQUES, M; TASSINARI, C; MARCOLINI, S; VIOLANTE, R; FIGUEIRA, R; DA SILVEIRA, I; BURONE, L; DE MELLO E SOUSA, S	UNKNOWN	-23.82	-42.79	-1				TIMS	SEDIMENTARY	UNKNOWN	UNKNOWN	SILICICLASTIC
ARGSHLF-1451-SAMPLE		SEDDB	10.1016/j.margeo.2007.11.007	Nd AND Pb ISOTOPE SIGNATURES ON THE SOUTHEASTERN SOUTH AMERICAN UPPER MARGIN: IMPLICATIONS FOR SEDIMENT TRANSPORT AND SOURCE ROCKS	MARINE GEOLOGY	DE MAHIQUES, M; TASSINARI, C; MARCOLINI, S; VIOLANTE, R; FIGUEIRA, R; DA SILVEIRA, I; BURONE, L; DE MELLO E SOUSA, S	UNKNOWN	-44.74	-65.42	-1				TIMS	SEDIMENTARY	UNKNOWN	UNKNOWN	SILICICLASTIC
SEBRAZIL-6573-SAMPLE		SEDDB	10.1016/j.margeo.2007.11.007	Nd AND Pb ISOTOPE SIGNATURES ON THE SOUTHEASTERN SOUTH AMERICAN UPPER MARGIN: IMPLICATIONS FOR SEDIMENT TRANSPORT AND SOURCE ROCKS	MARINE GEOLOGY	DE MAHIQUES, M; TASSINARI, C; MARCOLINI, S; VIOLANTE, R; FIGUEIRA, R; DA SILVEIRA, I; BURONE, L; DE MELLO E SOUSA, S	UNKNOWN	-24.91	-44.62	-1				TIMS	SEDIMENTARY	UNKNOWN	UNKNOWN	SILICICLASTIC
SEBRAZIL-6678-SAMPLE		SEDDB	10.1016/j.margeo.2007.11.007	Nd AND Pb ISOTOPE SIGNATURES ON THE SOUTHEASTERN SOUTH AMERICAN UPPER MARGIN: IMPLICATIONS FOR SEDIMENT TRANSPORT AND SOURCE ROCKS	MARINE GEOLOGY	DE MAHIQUES, M; TASSINARI, C; MARCOLINI, S; VIOLANTE, R; FIGUEIRA, R; DA SILVEIRA, I; BURONE, L; DE MELLO E SOUSA, S	UNKNOWN	-24.77	-45.19	-1				TIMS	SEDIMENTARY	UNKNOWN	UNKNOWN	SILICICLASTIC
SEBRAZIL-6735-SAMPLE		SEDDB	10.1016/j.margeo.2007.11.007	Nd AND Pb ISOTOPE SIGNATURES ON THE SOUTHEASTERN SOUTH AMERICAN UPPER MARGIN: IMPLICATIONS FOR SEDIMENT TRANSPORT AND SOURCE ROCKS	MARINE GEOLOGY	DE MAHIQUES, M; TASSINARI, C; MARCOLINI, S; VIOLANTE, R; FIGUEIRA, R; DA SILVEIRA, I; BURONE, L; DE MELLO E SOUSA, S	UNKNOWN	-23.75	-44.07	-1				TIMS	SEDIMENTARY	UNKNOWN	UNKNOWN	SILICICLASTIC
SEBRAZIL-6740-SAMPLE		SEDDB	10.1016/j.margeo.2007.11.007	Nd AND Pb ISOTOPE SIGNATURES ON THE SOUTHEASTERN SOUTH AMERICAN UPPER MARGIN: IMPLICATIONS FOR SEDIMENT TRANSPORT AND SOURCE ROCKS	MARINE GEOLOGY	DE MAHIQUES, M; TASSINARI, C; MARCOLINI, S; VIOLANTE, R; FIGUEIRA, R; DA SILVEIRA, I; BURONE, L; DE MELLO E SOUSA, S	UNKNOWN	-23.43	-43.43	-1				TIMS	SEDIMENTARY	UNKNOWN	UNKNOWN	SILICICLASTIC
ARGSHLF-1045-SAMPLE		SEDDB	10.1016/j.margeo.2007.11.007	Nd AND Pb ISOTOPE SIGNATURES ON THE SOUTHEASTERN SOUTH AMERICAN UPPER MARGIN: IMPLICATIONS FOR SEDIMENT TRANSPORT AND SOURCE ROCKS	MARINE GEOLOGY	DE MAHIQUES, M; TASSINARI, C; MARCOLINI, S; VIOLANTE, R; FIGUEIRA, R; DA SILVEIRA, I; BURONE, L; DE MELLO E SOUSA, S	UNKNOWN	-39.84	-61.96	-1				TIMS	SEDIMENTARY	UNKNOWN	UNKNOWN	SILICICLASTIC
RDLPTAEST-197-SAMPLE		SEDDB	10.1016/j.margeo.2007.11.007	Nd AND Pb ISOTOPE SIGNATURES ON THE SOUTHEASTERN SOUTH AMERICAN UPPER MARGIN: IMPLICATIONS FOR SEDIMENT TRANSPORT AND SOURCE ROCKS	MARINE GEOLOGY	DE MAHIQUES, M; TASSINARI, C; MARCOLINI, S; VIOLANTE, R; FIGUEIRA, R; DA SILVEIRA, I; BURONE, L; DE MELLO E SOUSA, S	UNKNOWN	-34.94	-56.73	-1				TIMS	SEDIMENTARY	UNKNOWN	UNKNOWN	SILICICLASTIC
RDLPTAEST-108-SAMPLE		SEDDB	10.1016/j.margeo.2007.11.007	Nd AND Pb ISOTOPE SIGNATURES ON THE SOUTHEASTERN SOUTH AMERICAN UPPER MARGIN: IMPLICATIONS FOR SEDIMENT TRANSPORT AND SOURCE ROCKS	MARINE GEOLOGY	DE MAHIQUES, M; TASSINARI, C; MARCOLINI, S; VIOLANTE, R; FIGUEIRA, R; DA SILVEIRA, I; BURONE, L; DE MELLO E SOUSA, S	UNKNOWN	-34.83	57.58	-1				TIMS	SEDIMENTARY	UNKNOWN	UNKNOWN	SILICICLASTIC
RDLPTAEST-64-SAMPLE		SEDDB	10.1016/j.margeo.2007.11.007	Nd AND Pb ISOTOPE SIGNATURES ON THE SOUTHEASTERN SOUTH AMERICAN UPPER MARGIN: IMPLICATIONS FOR SEDIMENT TRANSPORT AND SOURCE ROCKS	MARINE GEOLOGY	DE MAHIQUES, M; TASSINARI, C; MARCOLINI, S; VIOLANTE, R; FIGUEIRA, R; DA SILVEIRA, I; BURONE, L; DE MELLO E SOUSA, S	UNKNOWN	-34.69	57.95	-1				TIMS	SEDIMENTARY	UNKNOWN	UNKNOWN	SILICICLASTIC
SBRAZIL-6821-SAMPLE		SEDDB	10.1016/j.margeo.2007.11.007	Nd AND Pb ISOTOPE SIGNATURES ON THE SOUTHEASTERN SOUTH AMERICAN UPPER MARGIN: IMPLICATIONS FOR SEDIMENT TRANSPORT AND SOURCE ROCKS	MARINE GEOLOGY	DE MAHIQUES, M; TASSINARI, C; MARCOLINI, S; VIOLANTE, R; FIGUEIRA, R; DA SILVEIRA, I; BURONE, L; DE MELLO E SOUSA, S	UNKNOWN	-29.82	-48.21	-1				TIMS	SEDIMENTARY	UNKNOWN	UNKNOWN	SILICICLASTIC
SEBRAZIL-6743-SAMPLE		SEDDB	10.1016/j.margeo.2007.11.007	Nd AND Pb ISOTOPE SIGNATURES ON THE SOUTHEASTERN SOUTH AMERICAN UPPER MARGIN: IMPLICATIONS FOR SEDIMENT TRANSPORT AND SOURCE ROCKS	MARINE GEOLOGY	DE MAHIQUES, M; TASSINARI, C; MARCOLINI, S; VIOLANTE, R; FIGUEIRA, R; DA SILVEIRA, I; BURONE, L; DE MELLO E SOUSA, S	UNKNOWN	-23.92	-42.79	-1				TIMS	SEDIMENTARY	UNKNOWN	UNKNOWN	SILICICLASTIC
SEBRAZIL-6763-SAMPLE		SEDDB	10.1016/j.margeo.2007.11.007	Nd AND Pb ISOTOPE SIGNATURES ON THE SOUTHEASTERN SOUTH AMERICAN UPPER MARGIN: IMPLICATIONS FOR SEDIMENT TRANSPORT AND SOURCE ROCKS	MARINE GEOLOGY	DE MAHIQUES, M; TASSINARI, C; MARCOLINI, S; VIOLANTE, R; FIGUEIRA, R; DA SILVEIRA, I; BURONE, L; DE MELLO E SOUSA, S	UNKNOWN	-23.13	-41.02	-1				TIMS	SEDIMENTARY	UNKNOWN	UNKNOWN	SILICICLASTIC
MEL0502-015/182-184		SEDDB	10.1029/2006PA001406	PISTON CORE RECORD OF LATE PALEOGENE (31 Ma) TO RECENT SEAFLOOR HYDROTHERMAL ACTIVITY IN THE SOUTHWEST PACIFIC BASIN	PALEOCEANOGRAPHY	STANCIN, A; GLEASON, J; OWEN, R; REA, D; BLUM, J	TUMI03MV	-31.743	-143.505	-1				INAA	SEDIMENTARY	UNKNOWN	UNKNOWN	SILICICLASTIC			14.88	12.61		11.35					3.4			3.1				143.86		262.89		165.79	41.97	9.2		6					19.9
MEL0502-015/742-744		SEDDB	10.1029/2006PA001406	PISTON CORE RECORD OF LATE PALEOGENE (31 Ma) TO RECENT SEAFLOOR HYDROTHERMAL ACTIVITY IN THE SOUTHWEST PACIFIC BASIN	PALEOCEANOGRAPHY	STANCIN, A; GLEASON, J; OWEN, R; REA, D; BLUM, J	TUMI03MV	-31.743	-143.505	-1				INAA	SEDIMENTARY	UNKNOWN	UNKNOWN	SILICICLASTIC			6.26	48.08		43.26					0.79			7.04				307.84		267.2		255.12	67.7	14.91		9.76					31.48
MEL0502-015/782-784		SEDDB	10.1029/2006PA001406	PISTON CORE RECORD OF LATE PALEOGENE (31 Ma) TO RECENT SEAFLOOR HYDROTHERMAL ACTIVITY IN THE SOUTHWEST PACIFIC BASIN	PALEOCEANOGRAPHY	STANCIN, A; GLEASON, J; OWEN, R; REA, D; BLUM, J	TUMI03MV	-31.743	-143.505	-1				INAA	SEDIMENTARY	UNKNOWN	UNKNOWN	SILICICLASTIC			5.71	46.18		41.55					0.8			6.95				313.86		400.12		252.9	69.28	22.33		14.98					31.33
MEL0502-015/0-2		SEDDB	10.1029/2006PA001406	PISTON CORE RECORD OF LATE PALEOGENE (31 Ma) TO RECENT SEAFLOOR HYDROTHERMAL ACTIVITY IN THE SOUTHWEST PACIFIC BASIN	PALEOCEANOGRAPHY	STANCIN, A; GLEASON, J; OWEN, R; REA, D; BLUM, J	TUMI03MV	-31.743	-143.505	-1				INAA	SEDIMENTARY	UNKNOWN	UNKNOWN	SILICICLASTIC			15.19	12.05		10.85					2.66			2.82				144.28		250.4		176.16	42	9.06		6.57					19.62
MEL0502-015/422-424		SEDDB	10.1029/2006PA001406	PISTON CORE RECORD OF LATE PALEOGENE (31 Ma) TO RECENT SEAFLOOR HYDROTHERMAL ACTIVITY IN THE SOUTHWEST PACIFIC BASIN	PALEOCEANOGRAPHY	STANCIN, A; GLEASON, J; OWEN, R; REA, D; BLUM, J	TUMI03MV	-31.743	-143.505	-1				INAA	SEDIMENTARY	UNKNOWN	UNKNOWN	SILICICLASTIC			8.59	28.75		25.87					1.13			5.23				346.32		399.93		377.43	84.53	20.9		14.41					38.23
MEL0502-015/522-524		SEDDB	10.1029/2006PA001406	PISTON CORE RECORD OF LATE PALEOGENE (31 Ma) TO RECENT SEAFLOOR HYDROTHERMAL ACTIVITY IN THE SOUTHWEST PACIFIC BASIN	PALEOCEANOGRAPHY	STANCIN, A; GLEASON, J; OWEN, R; REA, D; BLUM, J	TUMI03MV	-31.743	-143.505	-1				INAA	SEDIMENTARY	UNKNOWN	UNKNOWN	SILICICLASTIC			8.01	41		36.89					1.29			5.59				322.54		302.69		266.73	74.91	17.22		11.81					34.09
MEL0502-015/342-344		SEDDB	10.1029/2006PA001406	PISTON CORE RECORD OF LATE PALEOGENE (31 Ma) TO RECENT SEAFLOOR HYDROTHERMAL ACTIVITY IN THE SOUTHWEST PACIFIC BASIN	PALEOCEANOGRAPHY	STANCIN, A; GLEASON, J; OWEN, R; REA, D; BLUM, J	TUMI03MV	-31.743	-143.505	-1				INAA	SEDIMENTARY	UNKNOWN	UNKNOWN	SILICICLASTIC			11.24	23.23		20.91					2.01			4.39				336.4		380.83		372.16	87.78	20.21		14.83					41
MEL0502-015/262-264		SEDDB	10.1029/2006PA001406	PISTON CORE RECORD OF LATE PALEOGENE (31 Ma) TO RECENT SEAFLOOR HYDROTHERMAL ACTIVITY IN THE SOUTHWEST PACIFIC BASIN	PALEOCEANOGRAPHY	STANCIN, A; GLEASON, J; OWEN, R; REA, D; BLUM, J	TUMI03MV	-31.743	-143.505	-1				INAA	SEDIMENTARY	UNKNOWN	UNKNOWN	SILICICLASTIC			12.52	18.6		16.74					2.51			4.68				271.62		334.13		330.68	69.67	16.38		12.02					34.21
MEL0502-015/302-304		SEDDB	10.1029/2006PA001406	PISTON CORE RECORD OF LATE PALEOGENE (31 Ma) TO RECENT SEAFLOOR HYDROTHERMAL ACTIVITY IN THE SOUTHWEST PACIFIC BASIN	PALEOCEANOGRAPHY	STANCIN, A; GLEASON, J; OWEN, R; REA, D; BLUM, J	TUMI03MV	-31.743	-143.505	-1				INAA	SEDIMENTARY	UNKNOWN	UNKNOWN	SILICICLASTIC			11.85	21.06		18.95					2.16			4.69				326.78		378.09		346.25	84.08	19.75		13.96					39.73
MEL0502-015/442-444		SEDDB	10.1029/2006PA001406	PISTON CORE RECORD OF LATE PALEOGENE (31 Ma) TO RECENT SEAFLOOR HYDROTHERMAL ACTIVITY IN THE SOUTHWEST PACIFIC BASIN	PALEOCEANOGRAPHY	STANCIN, A; GLEASON, J; OWEN, R; REA, D; BLUM, J	TUMI03MV	-31.743	-143.505	-1				INAA	SEDIMENTARY	UNKNOWN	UNKNOWN	SILICICLASTIC			7.61	35.07		31.56					1.12			5.17				346.69		397.78		351.47	81.53	19.83		13.69					38.88
MEL0502-015/552-554		SEDDB	10.1029/2006PA001406	PISTON CORE RECORD OF LATE PALEOGENE (31 Ma) TO RECENT SEAFLOOR HYDROTHERMAL ACTIVITY IN THE SOUTHWEST PACIFIC BASIN	PALEOCEANOGRAPHY	STANCIN, A; GLEASON, J; OWEN, R; REA, D; BLUM, J	TUMI03MV	-31.743	-143.505	-1				INAA	SEDIMENTARY	UNKNOWN	UNKNOWN	SILICICLASTIC			6.34	42.75		38.47					0.9			5.16				330		274.72		295.3	75.22	17.79		11.75					35.73
MEL0502-015/572-574		SEDDB	10.1029/2006PA001406	PISTON CORE RECORD OF LATE PALEOGENE (31 Ma) TO RECENT SEAFLOOR HYDROTHERMAL ACTIVITY IN THE SOUTHWEST PACIFIC BASIN	PALEOCEANOGRAPHY	STANCIN, A; GLEASON, J; OWEN, R; REA, D; BLUM, J	TUMI03MV	-31.743	-143.505	-1				INAA	SEDIMENTARY	UNKNOWN	UNKNOWN	SILICICLASTIC			6.44	45.26		40.72					0.82			5.64				313.9		275.03		289.54	70.51	15.89		10.96					33.38
MEL0502-015/642-644		SEDDB	10.1029/2006PA001406	PISTON CORE RECORD OF LATE PALEOGENE (31 Ma) TO RECENT SEAFLOOR HYDROTHERMAL ACTIVITY IN THE SOUTHWEST PACIFIC BASIN	PALEOCEANOGRAPHY	STANCIN, A; GLEASON, J; OWEN, R; REA, D; BLUM, J	TUMI03MV	-31.743	-143.505	-1				INAA	SEDIMENTARY	UNKNOWN	UNKNOWN	SILICICLASTIC			6.16	45.27		40.73					0.68			6.28				318.55		287.88		272.44	69.35	15.81		10.39					33.17
MEL0502-015/702-704		SEDDB	10.1029/2006PA001406	PISTON CORE RECORD OF LATE PALEOGENE (31 Ma) TO RECENT SEAFLOOR HYDROTHERMAL ACTIVITY IN THE SOUTHWEST PACIFIC BASIN	PALEOCEANOGRAPHY	STANCIN, A; GLEASON, J; OWEN, R; REA, D; BLUM, J	TUMI03MV	-31.743	-143.505	-1				INAA	SEDIMENTARY	UNKNOWN	UNKNOWN	SILICICLASTIC			5.91	46.1		41.48					0.59			6.59				324.3		274.7		251.76	69.88	16.43		10.89					32.81
MEL0502-015/822-824		SEDDB	10.1029/2006PA001406	PISTON CORE RECORD OF LATE PALEOGENE (31 Ma) TO RECENT SEAFLOOR HYDROTHERMAL ACTIVITY IN THE SOUTHWEST PACIFIC BASIN	PALEOCEANOGRAPHY	STANCIN, A; GLEASON, J; OWEN, R; REA, D; BLUM, J	TUMI03MV	-31.743	-143.505	-1				INAA	SEDIMENTARY	UNKNOWN	UNKNOWN	SILICICLASTIC			4.46	43.75		39.36					0.68			6.75				275.02		340.93		221.02	60.91	18.09		12.35					27.45
MEL0502-015/22-24		SEDDB	10.1029/2006PA001406	PISTON CORE RECORD OF LATE PALEOGENE (31 Ma) TO RECENT SEAFLOOR HYDROTHERMAL ACTIVITY IN THE SOUTHWEST PACIFIC BASIN	PALEOCEANOGRAPHY	STANCIN, A; GLEASON, J; OWEN, R; REA, D; BLUM, J	TUMI03MV	-31.743	-143.505	-1				INAA	SEDIMENTARY	UNKNOWN	UNKNOWN	SILICICLASTIC			15.61	11.61		10.44					2.81			2.73				117.44		235.56		127.45	33.89	7.41		5.3					16.57
MEL0502-015/102-104		SEDDB	10.1029/2006PA001406	PISTON CORE RECORD OF LATE PALEOGENE (31 Ma) TO RECENT SEAFLOOR HYDROTHERMAL ACTIVITY IN THE SOUTHWEST PACIFIC BASIN	PALEOCEANOGRAPHY	STANCIN, A; GLEASON, J; OWEN, R; REA, D; BLUM, J	TUMI03MV	-31.743	-143.505	-1				INAA	SEDIMENTARY	UNKNOWN	UNKNOWN	SILICICLASTIC			14.43	11.28		10.15					2.9			2.85				129.64		239.56		169.79	38.4	8.82		6.04					17.99
MEL0502-015/362-364		SEDDB	10.1029/2006PA001406	PISTON CORE RECORD OF LATE PALEOGENE (31 Ma) TO RECENT SEAFLOOR HYDROTHERMAL ACTIVITY IN THE SOUTHWEST PACIFIC BASIN	PALEOCEANOGRAPHY	STANCIN, A; GLEASON, J; OWEN, R; REA, D; BLUM, J	TUMI03MV	-31.743	-143.505	-1				INAA	SEDIMENTARY	UNKNOWN	UNKNOWN	SILICICLASTIC			9.61	23.3		20.96					2.45			5.35				409.33		419.02		518.8	107.2	25.82		18.78					49.45
MEL0502-015/482-494		SEDDB	10.1029/2006PA001406	PISTON CORE RECORD OF LATE PALEOGENE (31 Ma) TO RECENT SEAFLOOR HYDROTHERMAL ACTIVITY IN THE SOUTHWEST PACIFIC BASIN	PALEOCEANOGRAPHY	STANCIN, A; GLEASON, J; OWEN, R; REA, D; BLUM, J	TUMI03MV	-31.743	-143.505	-1				INAA	SEDIMENTARY	UNKNOWN	UNKNOWN	SILICICLASTIC			8.41	39.09		35.18					1.04			5.86				372.6		303.06		306.41	87.98	17.44		11.53					40.49
MEL0502-015/612-614		SEDDB	10.1029/2006PA001406	PISTON CORE RECORD OF LATE PALEOGENE (31 Ma) TO RECENT SEAFLOOR HYDROTHERMAL ACTIVITY IN THE SOUTHWEST PACIFIC BASIN	PALEOCEANOGRAPHY	STANCIN, A; GLEASON, J; OWEN, R; REA, D; BLUM, J	TUMI03MV	-31.743	-143.505	-1				INAA	SEDIMENTARY	UNKNOWN	UNKNOWN	SILICICLASTIC			5.86	45.66		41.09					0.65			5.55				343.64		289.36		268.15	75.51	16.54		11.51					35.82
MEL0502-015/682-684		SEDDB	10.1029/2006PA001406	PISTON CORE RECORD OF LATE PALEOGENE (31 Ma) TO RECENT SEAFLOOR HYDROTHERMAL ACTIVITY IN THE SOUTHWEST PACIFIC BASIN	PALEOCEANOGRAPHY	STANCIN, A; GLEASON, J; OWEN, R; REA, D; BLUM, J	TUMI03MV	-31.743	-143.505	-1				INAA	SEDIMENTARY	UNKNOWN	UNKNOWN	SILICICLASTIC			5.57	48.28		43.44					0.62			6.45				320.95		296.87		256.91	68.39	16.55		10.94					32.67
MEL0502-015/42-44		SEDDB	10.1029/2006PA001406	PISTON CORE RECORD OF LATE PALEOGENE (31 Ma) TO RECENT SEAFLOOR HYDROTHERMAL ACTIVITY IN THE SOUTHWEST PACIFIC BASIN	PALEOCEANOGRAPHY	STANCIN, A; GLEASON, J; OWEN, R; REA, D; BLUM, J	TUMI03MV	-31.743	-143.505	-1				INAA	SEDIMENTARY	UNKNOWN	UNKNOWN	SILICICLASTIC			14.5	12.65		11.38					2.44			2.9				128.52		263.73		158.03	37.38	9.26		6.48					17.71
MEL0502-015/82-84		SEDDB	10.1029/2006PA001406	PISTON CORE RECORD OF LATE PALEOGENE (31 Ma) TO RECENT SEAFLOOR HYDROTHERMAL ACTIVITY IN THE SOUTHWEST PACIFIC BASIN	PALEOCEANOGRAPHY	STANCIN, A; GLEASON, J; OWEN, R; REA, D; BLUM, J	TUMI03MV	-31.743	-143.505	-1				INAA	SEDIMENTARY	UNKNOWN	UNKNOWN	SILICICLASTIC			13.97	11.95		10.75					2.71			2.61				102.01		232.18		125.26	29.38	6.1		4.41					13.56
MEL0502-015/142-144		SEDDB	10.1029/2006PA001406	PISTON CORE RECORD OF LATE PALEOGENE (31 Ma) TO RECENT SEAFLOOR HYDROTHERMAL ACTIVITY IN THE SOUTHWEST PACIFIC BASIN	PALEOCEANOGRAPHY	STANCIN, A; GLEASON, J; OWEN, R; REA, D; BLUM, J	TUMI03MV	-31.743	-143.505	-1				INAA	SEDIMENTARY	UNKNOWN	UNKNOWN	SILICICLASTIC			15.8	11.49		10.34					2.53			3.01				131.71		252.56		172.14	39.19	8.79		6.02					17.88
MEL0502-015/202-204		SEDDB	10.1029/2006PA001406	PISTON CORE RECORD OF LATE PALEOGENE (31 Ma) TO RECENT SEAFLOOR HYDROTHERMAL ACTIVITY IN THE SOUTHWEST PACIFIC BASIN	PALEOCEANOGRAPHY	STANCIN, A; GLEASON, J; OWEN, R; REA, D; BLUM, J	TUMI03MV	-31.743	-143.505	-1				INAA	SEDIMENTARY	UNKNOWN	UNKNOWN	SILICICLASTIC			14.19	12.47		11.22					2.68			3.13				143.86		271.3		190.97	43.47	9.26		6.92					19.5
MEL0502-015/242-244		SEDDB	10.1029/2006PA001406	PISTON CORE RECORD OF LATE PALEOGENE (31 Ma) TO RECENT SEAFLOOR HYDROTHERMAL ACTIVITY IN THE SOUTHWEST PACIFIC BASIN	PALEOCEANOGRAPHY	STANCIN, A; GLEASON, J; OWEN, R; REA, D; BLUM, J	TUMI03MV	-31.743	-143.505	-1				INAA	SEDIMENTARY	UNKNOWN	UNKNOWN	SILICICLASTIC			12.59	18.26		16.43					2.02			4.89				279.58		330.19		304.81	71.18	16.15		11.85					35.63
HAKGH7801-1038/0-4		SEDDB	10.1016/0016-7037(90)90441-M	RARE EARTH ELEMENTS OF PACIFIC PELAGIC SEDIMENTS	GEOCHIM COSMOCHIM ACTA	TOYODA, K; NAKAMURA, Y; MASUDA, A	GH78	10	179.983	-1				ICPOES	SEDIMENTARY	UNKNOWN	UNKNOWN	SILICICLASTIC									1.56				0.51	0.82
HAKGH7801-1038/0-4		SEDDB	10.1016/0016-7037(90)90441-M	RARE EARTH ELEMENTS OF PACIFIC PELAGIC SEDIMENTS	GEOCHIM COSMOCHIM ACTA	TOYODA, K; NAKAMURA, Y; MASUDA, A	GH78	10	179.983	-1				INAA	SEDIMENTARY	UNKNOWN	UNKNOWN	SILICICLASTIC																		50.8		84.3			13.5	3.16							8
HAK6803-004/50-52		SEDDB	10.1016/0016-7037(90)90441-M	RARE EARTH ELEMENTS OF PACIFIC PELAGIC SEDIMENTS	GEOCHIM COSMOCHIM ACTA	TOYODA, K; NAKAMURA, Y; MASUDA, A	KH68-03	38	-165.5	-1				ICPOES	SEDIMENTARY	UNKNOWN	UNKNOWN	SILICICLASTIC									1.04				0.13	0.19
HAK6803-004/50-52		SEDDB	10.1016/0016-7037(90)90441-M	RARE EARTH ELEMENTS OF PACIFIC PELAGIC SEDIMENTS	GEOCHIM COSMOCHIM ACTA	TOYODA, K; NAKAMURA, Y; MASUDA, A	KH68-03	38	-165.5	-1				INAA	SEDIMENTARY	UNKNOWN	UNKNOWN	SILICICLASTIC																		25.6		67.2			4.91	1.1		0.64					2.8
HAK6804-018-003/58-60		SEDDB	10.1016/0016-7037(90)90441-M	RARE EARTH ELEMENTS OF PACIFIC PELAGIC SEDIMENTS	GEOCHIM COSMOCHIM ACTA	TOYODA, K; NAKAMURA, Y; MASUDA, A	KH68-04	1.983	-170.017	-1				ICPOES	SEDIMENTARY	UNKNOWN	UNKNOWN	SILICICLASTIC									1.22				0.36	0.92
HAK6804-018-003/58-60		SEDDB	10.1016/0016-7037(90)90441-M	RARE EARTH ELEMENTS OF PACIFIC PELAGIC SEDIMENTS	GEOCHIM COSMOCHIM ACTA	TOYODA, K; NAKAMURA, Y; MASUDA, A	KH68-04	1.983	-170.017	-1				INAA	SEDIMENTARY	UNKNOWN	UNKNOWN	SILICICLASTIC																		44.7		76.1			13.5	3.4		1.7					5
HAK7002-007-003/98-102		SEDDB	10.1016/0016-7037(90)90441-M	RARE EARTH ELEMENTS OF PACIFIC PELAGIC SEDIMENTS	GEOCHIM COSMOCHIM ACTA	TOYODA, K; NAKAMURA, Y; MASUDA, A	KH70-02	33.033	-169.9	-1				ICPOES	SEDIMENTARY	UNKNOWN	UNKNOWN	SILICICLASTIC									0.62				0.084	0.49
HAK7002-007-003/98-102		SEDDB	10.1016/0016-7037(90)90441-M	RARE EARTH ELEMENTS OF PACIFIC PELAGIC SEDIMENTS	GEOCHIM COSMOCHIM ACTA	TOYODA, K; NAKAMURA, Y; MASUDA, A	KH70-02	33.033	-169.9	-1				INAA	SEDIMENTARY	UNKNOWN	UNKNOWN	SILICICLASTIC																		38.7		108			6.6	1.5		0.96					2.9
HAK7002-009-003/74-76		SEDDB	10.1016/0016-7037(90)90441-M	RARE EARTH ELEMENTS OF PACIFIC PELAGIC SEDIMENTS	GEOCHIM COSMOCHIM ACTA	TOYODA, K; NAKAMURA, Y; MASUDA, A	KH70-02	17.1	-146.2	-1				ICPOES	SEDIMENTARY	UNKNOWN	UNKNOWN	SILICICLASTIC									2.19				0.86	1.33
HAK7002-009-003/74-76		SEDDB	10.1016/0016-7037(90)90441-M	RARE EARTH ELEMENTS OF PACIFIC PELAGIC SEDIMENTS	GEOCHIM COSMOCHIM ACTA	TOYODA, K; NAKAMURA, Y; MASUDA, A	KH70-02	17.1	-146.2	-1				INAA	SEDIMENTARY	UNKNOWN	UNKNOWN	SILICICLASTIC																		133		138			39	9.1		6.7					16.7
HAK7101-115/50-52		SEDDB	10.1016/0016-7037(90)90441-M	RARE EARTH ELEMENTS OF PACIFIC PELAGIC SEDIMENTS	GEOCHIM COSMOCHIM ACTA	TOYODA, K; NAKAMURA, Y; MASUDA, A	KH71-01	12.066	130.18	-1				ICPOES	SEDIMENTARY	UNKNOWN	UNKNOWN	SILICICLASTIC									1.24				0.19	1.06
HAK7101-115/50-52		SEDDB	10.1016/0016-7037(90)90441-M	RARE EARTH ELEMENTS OF PACIFIC PELAGIC SEDIMENTS	GEOCHIM COSMOCHIM ACTA	TOYODA, K; NAKAMURA, Y; MASUDA, A	KH71-01	12.066	130.18	-1				INAA	SEDIMENTARY	UNKNOWN	UNKNOWN	SILICICLASTIC																		28.8		70.6			7.2	1.9		1.1					3.2
HAK7105-012-003/50-52		SEDDB	10.1016/0016-7037(90)90441-M	RARE EARTH ELEMENTS OF PACIFIC PELAGIC SEDIMENTS	GEOCHIM COSMOCHIM ACTA	TOYODA, K; NAKAMURA, Y; MASUDA, A	KH71-01	-11.017	-146.017	-1				ICPOES	SEDIMENTARY	UNKNOWN	UNKNOWN	SILICICLASTIC									3.39				1.62	3.55
HAK7105-012-003/50-52		SEDDB	10.1016/0016-7037(90)90441-M	RARE EARTH ELEMENTS OF PACIFIC PELAGIC SEDIMENTS	GEOCHIM COSMOCHIM ACTA	TOYODA, K; NAKAMURA, Y; MASUDA, A	KH71-01	-11.017	-146.017	-1				INAA	SEDIMENTARY	UNKNOWN	UNKNOWN	SILICICLASTIC																		239		137			56.2	15		12					31.4
HAK7105-012-003/100-102		SEDDB	10.1016/0016-7037(90)90441-M	RARE EARTH ELEMENTS OF PACIFIC PELAGIC SEDIMENTS	GEOCHIM COSMOCHIM ACTA	TOYODA, K; NAKAMURA, Y; MASUDA, A	KH71-01	-11.017	-146.017	-1				ICPOES	SEDIMENTARY	UNKNOWN	UNKNOWN	SILICICLASTIC									3.43				2.07	3.61
HAK7105-012-003/100-102		SEDDB	10.1016/0016-7037(90)90441-M	RARE EARTH ELEMENTS OF PACIFIC PELAGIC SEDIMENTS	GEOCHIM COSMOCHIM ACTA	TOYODA, K; NAKAMURA, Y; MASUDA, A	KH71-01	-11.017	-146.017	-1				INAA	SEDIMENTARY	UNKNOWN	UNKNOWN	SILICICLASTIC																		230		142			53.5	12.7		10.1					27.8
HAK7105-015-002/102-104		SEDDB	10.1016/0016-7037(90)90441-M	RARE EARTH ELEMENTS OF PACIFIC PELAGIC SEDIMENTS	GEOCHIM COSMOCHIM ACTA	TOYODA, K; NAKAMURA, Y; MASUDA, A	KH71-01	-20.383	-148.033	-1				ICPOES	SEDIMENTARY	UNKNOWN	UNKNOWN	SILICICLASTIC									2.67				1.58	3.17
HAK7105-015-002/102-104		SEDDB	10.1016/0016-7037(90)90441-M	RARE EARTH ELEMENTS OF PACIFIC PELAGIC SEDIMENTS	GEOCHIM COSMOCHIM ACTA	TOYODA, K; NAKAMURA, Y; MASUDA, A	KH71-01	-20.383	-148.033	-1				INAA	SEDIMENTARY	UNKNOWN	UNKNOWN	SILICICLASTIC																		126		224			32.5	7.7		5.1					10.9
HAK7105-044/4-6		SEDDB	10.1016/0016-7037(90)90441-M	RARE EARTH ELEMENTS OF PACIFIC PELAGIC SEDIMENTS	GEOCHIM COSMOCHIM ACTA	TOYODA, K; NAKAMURA, Y; MASUDA, A	KH71-01	-21	-91	-1				ICPOES	SEDIMENTARY	UNKNOWN	UNKNOWN	SILICICLASTIC									8.98				1.05	2.58
HAK7105-044/4-6		SEDDB	10.1016/0016-7037(90)90441-M	RARE EARTH ELEMENTS OF PACIFIC PELAGIC SEDIMENTS	GEOCHIM COSMOCHIM ACTA	TOYODA, K; NAKAMURA, Y; MASUDA, A	KH71-01	-21	-91	-1				INAA	SEDIMENTARY	UNKNOWN	UNKNOWN	SILICICLASTIC																		138		180			34.5	8.73		6.2					18.2
HAK7202-056/140-142		SEDDB	10.1016/0016-7037(90)90441-M	RARE EARTH ELEMENTS OF PACIFIC PELAGIC SEDIMENTS	GEOCHIM COSMOCHIM ACTA	TOYODA, K; NAKAMURA, Y; MASUDA, A	KH72-02	21.567	132.7	-1				ICPOES	SEDIMENTARY	UNKNOWN	UNKNOWN	SILICICLASTIC									1.9				0.24	0.86
HAK7202-056/140-142		SEDDB	10.1016/0016-7037(90)90441-M	RARE EARTH ELEMENTS OF PACIFIC PELAGIC SEDIMENTS	GEOCHIM COSMOCHIM ACTA	TOYODA, K; NAKAMURA, Y; MASUDA, A	KH72-02	21.567	132.7	-1				INAA	SEDIMENTARY	UNKNOWN	UNKNOWN	SILICICLASTIC																		44.8		91.5			8.6	2		1.4					4.2
HAK7304-009/144-146		SEDDB	10.1016/0016-7037(90)90441-M	RARE EARTH ELEMENTS OF PACIFIC PELAGIC SEDIMENTS	GEOCHIM COSMOCHIM ACTA	TOYODA, K; NAKAMURA, Y; MASUDA, A	KH73-04	-8	172.817	-1				ICPOES	SEDIMENTARY	UNKNOWN	UNKNOWN	SILICICLASTIC									3.16				0.46	1.14
HAK7304-009/144-146		SEDDB	10.1016/0016-7037(90)90441-M	RARE EARTH ELEMENTS OF PACIFIC PELAGIC SEDIMENTS	GEOCHIM COSMOCHIM ACTA	TOYODA, K; NAKAMURA, Y; MASUDA, A	KH73-04	-8	172.817	-1				INAA	SEDIMENTARY	UNKNOWN	UNKNOWN	SILICICLASTIC																		47.4		68.3			12.8	3.2		3					6.8
HAK8303-BC/2-4		SEDDB	10.1016/0016-7037(90)90441-M	RARE EARTH ELEMENTS OF PACIFIC PELAGIC SEDIMENTS	GEOCHIM COSMOCHIM ACTA	TOYODA, K; NAKAMURA, Y; MASUDA, A	KH83-3	43.3	154.7	-1				ICPOES	SEDIMENTARY	UNKNOWN	UNKNOWN	SILICICLASTIC									2.27				0.12	0.39
HAK8303-BC/2-4		SEDDB	10.1016/0016-7037(90)90441-M	RARE EARTH ELEMENTS OF PACIFIC PELAGIC SEDIMENTS	GEOCHIM COSMOCHIM ACTA	TOYODA, K; NAKAMURA, Y; MASUDA, A	KH83-3	43.3	154.7	-1				INAA	SEDIMENTARY	UNKNOWN	UNKNOWN	SILICICLASTIC																		12.5		31.5			3.2	0.85							2.1
HAK8303-C/0-1		SEDDB	10.1016/0016-7037(90)90441-M	RARE EARTH ELEMENTS OF PACIFIC PELAGIC SEDIMENTS	GEOCHIM COSMOCHIM ACTA	TOYODA, K; NAKAMURA, Y; MASUDA, A	KH83-3	45.03	160	-1				ICPOES	SEDIMENTARY	UNKNOWN	UNKNOWN	SILICICLASTIC									1.86				0.14	0.58
HAK8303-C/0-1		SEDDB	10.1016/0016-7037(90)90441-M	RARE EARTH ELEMENTS OF PACIFIC PELAGIC SEDIMENTS	GEOCHIM COSMOCHIM ACTA	TOYODA, K; NAKAMURA, Y; MASUDA, A	KH83-3	45.03	160	-1				INAA	SEDIMENTARY	UNKNOWN	UNKNOWN	SILICICLASTIC																		12.3		37			3.2	1.6		1.1					3.6
HAK6804-005/112-116		SEDDB	10.1016/0016-7037(90)90441-M	RARE EARTH ELEMENTS OF PACIFIC PELAGIC SEDIMENTS	GEOCHIM COSMOCHIM ACTA	TOYODA, K; NAKAMURA, Y; MASUDA, A	KH68-04	26.85	-170	-1				ICPOES	SEDIMENTARY	UNKNOWN	UNKNOWN	SILICICLASTIC									1.4				0.26	0.56
HAK6804-005/112-116		SEDDB	10.1016/0016-7037(90)90441-M	RARE EARTH ELEMENTS OF PACIFIC PELAGIC SEDIMENTS	GEOCHIM COSMOCHIM ACTA	TOYODA, K; NAKAMURA, Y; MASUDA, A	KH68-04	26.85	-170	-1				INAA	SEDIMENTARY	UNKNOWN	UNKNOWN	SILICICLASTIC																		55.9		117			13.2	3.1		2.1					4.9
HAK6804-039-002/98-103		SEDDB	10.1016/0016-7037(90)90441-M	RARE EARTH ELEMENTS OF PACIFIC PELAGIC SEDIMENTS	GEOCHIM COSMOCHIM ACTA	TOYODA, K; NAKAMURA, Y; MASUDA, A	KH68-04	-50.117	-169.983	-1				ICPOES	SEDIMENTARY	UNKNOWN	UNKNOWN	SILICICLASTIC									1.57				0.11	0.12
HAK6804-039-002/98-103		SEDDB	10.1016/0016-7037(90)90441-M	RARE EARTH ELEMENTS OF PACIFIC PELAGIC SEDIMENTS	GEOCHIM COSMOCHIM ACTA	TOYODA, K; NAKAMURA, Y; MASUDA, A	KH68-04	-50.117	-169.983	-1				INAA	SEDIMENTARY	UNKNOWN	UNKNOWN	SILICICLASTIC																		29.4		75.2			5.6	1.44		0.9					2.6
HAK7002-007-003/140-144		SEDDB	10.1016/0016-7037(90)90441-M	RARE EARTH ELEMENTS OF PACIFIC PELAGIC SEDIMENTS	GEOCHIM COSMOCHIM ACTA	TOYODA, K; NAKAMURA, Y; MASUDA, A	KH70-02	33.033	-169.9	-1				ICPOES	SEDIMENTARY	UNKNOWN	UNKNOWN	SILICICLASTIC									0.62				0.089	0.5
HAK7002-007-003/140-144		SEDDB	10.1016/0016-7037(90)90441-M	RARE EARTH ELEMENTS OF PACIFIC PELAGIC SEDIMENTS	GEOCHIM COSMOCHIM ACTA	TOYODA, K; NAKAMURA, Y; MASUDA, A	KH70-02	33.033	-169.9	-1				INAA	SEDIMENTARY	UNKNOWN	UNKNOWN	SILICICLASTIC																		37.1		118			6.5	1.5		0.96					3
HAK7002-018-003/50-52		SEDDB	10.1016/0016-7037(90)90441-M	RARE EARTH ELEMENTS OF PACIFIC PELAGIC SEDIMENTS	GEOCHIM COSMOCHIM ACTA	TOYODA, K; NAKAMURA, Y; MASUDA, A	KH70-02	44.033	-146.017	-1				ICPOES	SEDIMENTARY	UNKNOWN	UNKNOWN	SILICICLASTIC									2.25				0.99	0.3
HAK7002-018-003/50-52		SEDDB	10.1016/0016-7037(90)90441-M	RARE EARTH ELEMENTS OF PACIFIC PELAGIC SEDIMENTS	GEOCHIM COSMOCHIM ACTA	TOYODA, K; NAKAMURA, Y; MASUDA, A	KH70-02	44.033	-146.017	-1				INAA	SEDIMENTARY	UNKNOWN	UNKNOWN	SILICICLASTIC																		26.2		53.8			5.4	1.27		0.93					2.46
HAK7101-115/100-102		SEDDB	10.1016/0016-7037(90)90441-M	RARE EARTH ELEMENTS OF PACIFIC PELAGIC SEDIMENTS	GEOCHIM COSMOCHIM ACTA	TOYODA, K; NAKAMURA, Y; MASUDA, A	KH71-01	12.066	130.18	-1				ICPOES	SEDIMENTARY	UNKNOWN	UNKNOWN	SILICICLASTIC									1.38				0.2	0.99
HAK7101-115/100-102		SEDDB	10.1016/0016-7037(90)90441-M	RARE EARTH ELEMENTS OF PACIFIC PELAGIC SEDIMENTS	GEOCHIM COSMOCHIM ACTA	TOYODA, K; NAKAMURA, Y; MASUDA, A	KH71-01	12.066	130.18	-1				INAA	SEDIMENTARY	UNKNOWN	UNKNOWN	SILICICLASTIC																		33.6		71.6			8.4	2.1		1.6					4.4
HAK7304-006/100-102		SEDDB	10.1016/0016-7037(90)90441-M	RARE EARTH ELEMENTS OF PACIFIC PELAGIC SEDIMENTS	GEOCHIM COSMOCHIM ACTA	TOYODA, K; NAKAMURA, Y; MASUDA, A	KH73-04	10.767	153.7	-1				ICPOES	SEDIMENTARY	UNKNOWN	UNKNOWN	SILICICLASTIC									1.15				0.29	1.02
HAK7304-006/100-102		SEDDB	10.1016/0016-7037(90)90441-M	RARE EARTH ELEMENTS OF PACIFIC PELAGIC SEDIMENTS	GEOCHIM COSMOCHIM ACTA	TOYODA, K; NAKAMURA, Y; MASUDA, A	KH73-04	10.767	153.7	-1				INAA	SEDIMENTARY	UNKNOWN	UNKNOWN	SILICICLASTIC																		46.6		105			10.4	2.9		2.1					4.8
HAK7304-009/100-104		SEDDB	10.1016/0016-7037(90)90441-M	RARE EARTH ELEMENTS OF PACIFIC PELAGIC SEDIMENTS	GEOCHIM COSMOCHIM ACTA	TOYODA, K; NAKAMURA, Y; MASUDA, A	KH73-04	-8	172.817	-1				ICPOES	SEDIMENTARY	UNKNOWN	UNKNOWN	SILICICLASTIC									3.54				0.48	1.18
HAK7304-009/100-104		SEDDB	10.1016/0016-7037(90)90441-M	RARE EARTH ELEMENTS OF PACIFIC PELAGIC SEDIMENTS	GEOCHIM COSMOCHIM ACTA	TOYODA, K; NAKAMURA, Y; MASUDA, A	KH73-04	-8	172.817	-1				INAA	SEDIMENTARY	UNKNOWN	UNKNOWN	SILICICLASTIC																		52.1		74.3			14.2	3.8		2.7					7.1
HAK7602-003/32-34		SEDDB	10.1016/0016-7037(90)90441-M	RARE EARTH ELEMENTS OF PACIFIC PELAGIC SEDIMENTS	GEOCHIM COSMOCHIM ACTA	TOYODA, K; NAKAMURA, Y; MASUDA, A	KH76-02	24.45	132.583	-1				ICPOES	SEDIMENTARY	UNKNOWN	UNKNOWN	SILICICLASTIC									1.32				0.12	0.5
HAK7602-003/32-34		SEDDB	10.1016/0016-7037(90)90441-M	RARE EARTH ELEMENTS OF PACIFIC PELAGIC SEDIMENTS	GEOCHIM COSMOCHIM ACTA	TOYODA, K; NAKAMURA, Y; MASUDA, A	KH76-02	24.45	132.583	-1				INAA	SEDIMENTARY	UNKNOWN	UNKNOWN	SILICICLASTIC																		35.8		78.4			6.2	1.3		1.2					2.6
HAK7803-004/0-3		SEDDB	10.1016/0016-7037(90)90441-M	RARE EARTH ELEMENTS OF PACIFIC PELAGIC SEDIMENTS	GEOCHIM COSMOCHIM ACTA	TOYODA, K; NAKAMURA, Y; MASUDA, A	KH78-03	53.5	177.267	-1				ICPOES	SEDIMENTARY	UNKNOWN	UNKNOWN	SILICICLASTIC									1.85				0.1	0.96
HAK7803-004/0-3		SEDDB	10.1016/0016-7037(90)90441-M	RARE EARTH ELEMENTS OF PACIFIC PELAGIC SEDIMENTS	GEOCHIM COSMOCHIM ACTA	TOYODA, K; NAKAMURA, Y; MASUDA, A	KH78-03	53.5	177.267	-1				INAA	SEDIMENTARY	UNKNOWN	UNKNOWN	SILICICLASTIC																		6.7		15.6			18.7	0.55		0.28					0.98
HAK6804-015-003/62-66		SEDDB	10.1016/0016-7037(90)90441-M	RARE EARTH ELEMENTS OF PACIFIC PELAGIC SEDIMENTS	GEOCHIM COSMOCHIM ACTA	TOYODA, K; NAKAMURA, Y; MASUDA, A	KH68-04	11.983	-169.967	-1				ICPOES	SEDIMENTARY	UNKNOWN	UNKNOWN	SILICICLASTIC									1.53				0.53	0.81
HAK6804-015-003/62-66		SEDDB	10.1016/0016-7037(90)90441-M	RARE EARTH ELEMENTS OF PACIFIC PELAGIC SEDIMENTS	GEOCHIM COSMOCHIM ACTA	TOYODA, K; NAKAMURA, Y; MASUDA, A	KH68-04	11.983	-169.967	-1				INAA	SEDIMENTARY	UNKNOWN	UNKNOWN	SILICICLASTIC																		76.3		115			20.5	5.3		3.9					10.2
HAK7002-009-003/60-80		SEDDB	10.1016/0016-7037(90)90441-M	RARE EARTH ELEMENTS OF PACIFIC PELAGIC SEDIMENTS	GEOCHIM COSMOCHIM ACTA	TOYODA, K; NAKAMURA, Y; MASUDA, A	KH70-02	17.1	-146.2	-1				ICPOES	SEDIMENTARY	UNKNOWN	UNKNOWN	SILICICLASTIC		0.69	16.4	7.01				3	2.35		2.58		0.99	1.37
HAK7002-009-003/60-80		SEDDB	10.1016/0016-7037(90)90441-M	RARE EARTH ELEMENTS OF PACIFIC PELAGIC SEDIMENTS	GEOCHIM COSMOCHIM ACTA	TOYODA, K; NAKAMURA, Y; MASUDA, A	KH70-02	17.1	-146.2	-1				INAA	SEDIMENTARY	UNKNOWN	UNKNOWN	SILICICLASTIC																		124		168			41	8.8		5.9					18.8
HAK6804-022-002/100-102		SEDDB	10.1016/0016-7037(90)90441-M	RARE EARTH ELEMENTS OF PACIFIC PELAGIC SEDIMENTS	GEOCHIM COSMOCHIM ACTA	TOYODA, K; NAKAMURA, Y; MASUDA, A	KH68-04	-10.95	-169.983	-1				ICPOES	SEDIMENTARY	UNKNOWN	UNKNOWN	SILICICLASTIC									4.76				0.43	0.29
HAK6804-022-002/100-102		SEDDB	10.1016/0016-7037(90)90441-M	RARE EARTH ELEMENTS OF PACIFIC PELAGIC SEDIMENTS	GEOCHIM COSMOCHIM ACTA	TOYODA, K; NAKAMURA, Y; MASUDA, A	KH68-04	-10.95	-169.983	-1				INAA	SEDIMENTARY	UNKNOWN	UNKNOWN	SILICICLASTIC																		56.3		109			11.5	3.2		1.7					4.6
HAK6804-031-003/42-46		SEDDB	10.1016/0016-7037(90)90441-M	RARE EARTH ELEMENTS OF PACIFIC PELAGIC SEDIMENTS	GEOCHIM COSMOCHIM ACTA	TOYODA, K; NAKAMURA, Y; MASUDA, A	KH68-04	-32.15	-169.933	-1				ICPOES	SEDIMENTARY	UNKNOWN	UNKNOWN	SILICICLASTIC									2.4				0.24	0.55
HAK6804-031-003/42-46		SEDDB	10.1016/0016-7037(90)90441-M	RARE EARTH ELEMENTS OF PACIFIC PELAGIC SEDIMENTS	GEOCHIM COSMOCHIM ACTA	TOYODA, K; NAKAMURA, Y; MASUDA, A	KH68-04	-32.15	-169.933	-1				INAA	SEDIMENTARY	UNKNOWN	UNKNOWN	SILICICLASTIC																		23.5		66.4			5.3	1.3		0.75					2.6
HAK7002-005-003/50-52		SEDDB	10.1016/0016-7037(90)90441-M	RARE EARTH ELEMENTS OF PACIFIC PELAGIC SEDIMENTS	GEOCHIM COSMOCHIM ACTA	TOYODA, K; NAKAMURA, Y; MASUDA, A	KH70-02	38.433	-170.1	-1				ICPOES	SEDIMENTARY	UNKNOWN	UNKNOWN	SILICICLASTIC									0.74				0.61	0.23
HAK7002-005-003/50-52		SEDDB	10.1016/0016-7037(90)90441-M	RARE EARTH ELEMENTS OF PACIFIC PELAGIC SEDIMENTS	GEOCHIM COSMOCHIM ACTA	TOYODA, K; NAKAMURA, Y; MASUDA, A	KH70-02	38.433	-170.1	-1				INAA	SEDIMENTARY	UNKNOWN	UNKNOWN	SILICICLASTIC																		35.5		98			6.8	1.7		1.3					3.1
HAK7002-007-003/50-52		SEDDB	10.1016/0016-7037(90)90441-M	RARE EARTH ELEMENTS OF PACIFIC PELAGIC SEDIMENTS	GEOCHIM COSMOCHIM ACTA	TOYODA, K; NAKAMURA, Y; MASUDA, A	KH70-02	33.033	-169.9	-1				ICPOES	SEDIMENTARY	UNKNOWN	UNKNOWN	SILICICLASTIC									0.64				0.06	0.28
HAK7002-007-003/50-52		SEDDB	10.1016/0016-7037(90)90441-M	RARE EARTH ELEMENTS OF PACIFIC PELAGIC SEDIMENTS	GEOCHIM COSMOCHIM ACTA	TOYODA, K; NAKAMURA, Y; MASUDA, A	KH70-02	33.033	-169.9	-1				INAA	SEDIMENTARY	UNKNOWN	UNKNOWN	SILICICLASTIC																		32.6		97.3			5	1.1		0.93					2.8
HAK7101-112-001/50-52		SEDDB	10.1016/0016-7037(90)90441-M	RARE EARTH ELEMENTS OF PACIFIC PELAGIC SEDIMENTS	GEOCHIM COSMOCHIM ACTA	TOYODA, K; NAKAMURA, Y; MASUDA, A	KH71-01	1.867	147.033	-1				ICPOES	SEDIMENTARY	UNKNOWN	UNKNOWN	SILICICLASTIC									6.34				0.14	0.13
HAK7101-112-001/50-52		SEDDB	10.1016/0016-7037(90)90441-M	RARE EARTH ELEMENTS OF PACIFIC PELAGIC SEDIMENTS	GEOCHIM COSMOCHIM ACTA	TOYODA, K; NAKAMURA, Y; MASUDA, A	KH71-01	1.867	147.033	-1				INAA	SEDIMENTARY	UNKNOWN	UNKNOWN	SILICICLASTIC																		26.5		51.5			5.9	1.5		1					2.8
HAK7105-002-002/50-52		SEDDB	10.1016/0016-7037(90)90441-M	RARE EARTH ELEMENTS OF PACIFIC PELAGIC SEDIMENTS	GEOCHIM COSMOCHIM ACTA	TOYODA, K; NAKAMURA, Y; MASUDA, A	KH71-01	16.983	-146.05	-1				ICPOES	SEDIMENTARY	UNKNOWN	UNKNOWN	SILICICLASTIC									9.01				0.23	0.11
HAK7105-002-002/50-52		SEDDB	10.1016/0016-7037(90)90441-M	RARE EARTH ELEMENTS OF PACIFIC PELAGIC SEDIMENTS	GEOCHIM COSMOCHIM ACTA	TOYODA, K; NAKAMURA, Y; MASUDA, A	KH71-01	16.983	-146.05	-1				INAA	SEDIMENTARY	UNKNOWN	UNKNOWN	SILICICLASTIC																		14.3		32.4			3.1	0.88							2.1
HAK6804-005/42-46		SEDDB	10.1016/0016-7037(90)90441-M	RARE EARTH ELEMENTS OF PACIFIC PELAGIC SEDIMENTS	GEOCHIM COSMOCHIM ACTA	TOYODA, K; NAKAMURA, Y; MASUDA, A	KH68-04	26.85	-170	-1				ICPOES	SEDIMENTARY	UNKNOWN	UNKNOWN	SILICICLASTIC									1.3				0.28	0.61
HAK6804-005/42-46		SEDDB	10.1016/0016-7037(90)90441-M	RARE EARTH ELEMENTS OF PACIFIC PELAGIC SEDIMENTS	GEOCHIM COSMOCHIM ACTA	TOYODA, K; NAKAMURA, Y; MASUDA, A	KH68-04	26.85	-170	-1				INAA	SEDIMENTARY	UNKNOWN	UNKNOWN	SILICICLASTIC																		64.5		120			15.8	3.8		2.9					6
HAK6804-018-003/102-104		SEDDB	10.1016/0016-7037(90)90441-M	RARE EARTH ELEMENTS OF PACIFIC PELAGIC SEDIMENTS	GEOCHIM COSMOCHIM ACTA	TOYODA, K; NAKAMURA, Y; MASUDA, A	KH68-04	1.983	-170.017	-1				ICPOES	SEDIMENTARY	UNKNOWN	UNKNOWN	SILICICLASTIC									1.21				0.36	0.74
HAK6804-018-003/102-104		SEDDB	10.1016/0016-7037(90)90441-M	RARE EARTH ELEMENTS OF PACIFIC PELAGIC SEDIMENTS	GEOCHIM COSMOCHIM ACTA	TOYODA, K; NAKAMURA, Y; MASUDA, A	KH68-04	1.983	-170.017	-1				INAA	SEDIMENTARY	UNKNOWN	UNKNOWN	SILICICLASTIC																		48.1		72.6			15.1	4		2.7					5.8
HAK6804-020-002/50-52		SEDDB	10.1016/0016-7037(90)90441-M	RARE EARTH ELEMENTS OF PACIFIC PELAGIC SEDIMENTS	GEOCHIM COSMOCHIM ACTA	TOYODA, K; NAKAMURA, Y; MASUDA, A	KH68-04	-2.467	-170	-1				ICPOES	SEDIMENTARY	UNKNOWN	UNKNOWN	SILICICLASTIC									2.85				0.52	0.98
HAK6804-020-002/50-52		SEDDB	10.1016/0016-7037(90)90441-M	RARE EARTH ELEMENTS OF PACIFIC PELAGIC SEDIMENTS	GEOCHIM COSMOCHIM ACTA	TOYODA, K; NAKAMURA, Y; MASUDA, A	KH68-04	-2.467	-170	-1				INAA	SEDIMENTARY	UNKNOWN	UNKNOWN	SILICICLASTIC																		53		69.6			14.6	3.9		3					8.8
HAK6804-020-002/150-154		SEDDB	10.1016/0016-7037(90)90441-M	RARE EARTH ELEMENTS OF PACIFIC PELAGIC SEDIMENTS	GEOCHIM COSMOCHIM ACTA	TOYODA, K; NAKAMURA, Y; MASUDA, A	KH68-04	-2.467	-170	-1				ICPOES	SEDIMENTARY	UNKNOWN	UNKNOWN	SILICICLASTIC									2.18				0.53	0.86
HAK6804-020-002/150-154		SEDDB	10.1016/0016-7037(90)90441-M	RARE EARTH ELEMENTS OF PACIFIC PELAGIC SEDIMENTS	GEOCHIM COSMOCHIM ACTA	TOYODA, K; NAKAMURA, Y; MASUDA, A	KH68-04	-2.467	-170	-1				INAA	SEDIMENTARY	UNKNOWN	UNKNOWN	SILICICLASTIC																		52		63.7			13.5	3.8		2.9					7.4
HAK6804-025-002/104-108		SEDDB	10.1016/0016-7037(90)90441-M	RARE EARTH ELEMENTS OF PACIFIC PELAGIC SEDIMENTS	GEOCHIM COSMOCHIM ACTA	TOYODA, K; NAKAMURA, Y; MASUDA, A	KH68-04	-19.983	-170.033	-1				ICPOES	SEDIMENTARY	UNKNOWN	UNKNOWN	SILICICLASTIC									2.28				0.21	0.8
HAK6804-025-002/104-108		SEDDB	10.1016/0016-7037(90)90441-M	RARE EARTH ELEMENTS OF PACIFIC PELAGIC SEDIMENTS	GEOCHIM COSMOCHIM ACTA	TOYODA, K; NAKAMURA, Y; MASUDA, A	KH68-04	-19.983	-170.033	-1				INAA	SEDIMENTARY	UNKNOWN	UNKNOWN	SILICICLASTIC																		29.3		58.5			7.8	1.7		0.8					3
HAK6804-039-002/50-54		SEDDB	10.1016/0016-7037(90)90441-M	RARE EARTH ELEMENTS OF PACIFIC PELAGIC SEDIMENTS	GEOCHIM COSMOCHIM ACTA	TOYODA, K; NAKAMURA, Y; MASUDA, A	KH68-04	-50.117	-169.983	-1				ICPOES	SEDIMENTARY	UNKNOWN	UNKNOWN	SILICICLASTIC									1.47				0.16	0.083
HAK6804-039-002/50-54		SEDDB	10.1016/0016-7037(90)90441-M	RARE EARTH ELEMENTS OF PACIFIC PELAGIC SEDIMENTS	GEOCHIM COSMOCHIM ACTA	TOYODA, K; NAKAMURA, Y; MASUDA, A	KH68-04	-50.117	-169.983	-1				INAA	SEDIMENTARY	UNKNOWN	UNKNOWN	SILICICLASTIC																		32		81.4			6.3	1.55		1.2					2.7
HAK6804-055-003/50-52		SEDDB	10.1016/0016-7037(90)90441-M	RARE EARTH ELEMENTS OF PACIFIC PELAGIC SEDIMENTS	GEOCHIM COSMOCHIM ACTA	TOYODA, K; NAKAMURA, Y; MASUDA, A	KH68-04	-54.233	155.2	-1				ICPOES	SEDIMENTARY	UNKNOWN	UNKNOWN	SILICICLASTIC									2.04				0.11	0.92
HAK6804-055-003/50-52		SEDDB	10.1016/0016-7037(90)90441-M	RARE EARTH ELEMENTS OF PACIFIC PELAGIC SEDIMENTS	GEOCHIM COSMOCHIM ACTA	TOYODA, K; NAKAMURA, Y; MASUDA, A	KH68-04	-54.233	155.2	-1				INAA	SEDIMENTARY	UNKNOWN	UNKNOWN	SILICICLASTIC																		53.9		108			11	2.7		1.8					4.6
HAK7002-005-003/100-102		SEDDB	10.1016/0016-7037(90)90441-M	RARE EARTH ELEMENTS OF PACIFIC PELAGIC SEDIMENTS	GEOCHIM COSMOCHIM ACTA	TOYODA, K; NAKAMURA, Y; MASUDA, A	KH70-02	38.433	-170.1	-1				ICPOES	SEDIMENTARY	UNKNOWN	UNKNOWN	SILICICLASTIC									0.69				0.07	0.29
HAK7002-005-003/100-102		SEDDB	10.1016/0016-7037(90)90441-M	RARE EARTH ELEMENTS OF PACIFIC PELAGIC SEDIMENTS	GEOCHIM COSMOCHIM ACTA	TOYODA, K; NAKAMURA, Y; MASUDA, A	KH70-02	38.433	-170.1	-1				INAA	SEDIMENTARY	UNKNOWN	UNKNOWN	SILICICLASTIC																		36.2		102			6.5
HAK7002-018-003/100-102		SEDDB	10.1016/0016-7037(90)90441-M	RARE EARTH ELEMENTS OF PACIFIC PELAGIC SEDIMENTS	GEOCHIM COSMOCHIM ACTA	TOYODA, K; NAKAMURA, Y; MASUDA, A	KH70-02	44.033	-146.017	-1				ICPOES	SEDIMENTARY	UNKNOWN	UNKNOWN	SILICICLASTIC									2.49				0.24	0.1
HAK7002-018-003/100-102		SEDDB	10.1016/0016-7037(90)90441-M	RARE EARTH ELEMENTS OF PACIFIC PELAGIC SEDIMENTS	GEOCHIM COSMOCHIM ACTA	TOYODA, K; NAKAMURA, Y; MASUDA, A	KH70-02	44.033	-146.017	-1				INAA	SEDIMENTARY	UNKNOWN	UNKNOWN	SILICICLASTIC																		31.5		63.3			5.9	1.5		1.19					2.62
HAK7101-112-002/50-52		SEDDB	10.1016/0016-7037(90)90441-M	RARE EARTH ELEMENTS OF PACIFIC PELAGIC SEDIMENTS	GEOCHIM COSMOCHIM ACTA	TOYODA, K; NAKAMURA, Y; MASUDA, A	KH71-01	1.883	147	-1				ICPOES	SEDIMENTARY	UNKNOWN	UNKNOWN	SILICICLASTIC									2.2				0.19	0.46
HAK7101-112-002/50-52		SEDDB	10.1016/0016-7037(90)90441-M	RARE EARTH ELEMENTS OF PACIFIC PELAGIC SEDIMENTS	GEOCHIM COSMOCHIM ACTA	TOYODA, K; NAKAMURA, Y; MASUDA, A	KH71-01	1.883	147	-1				INAA	SEDIMENTARY	UNKNOWN	UNKNOWN	SILICICLASTIC																		26.2		50.7			6.2	1.6		1					2.6
HAK7202-002/25-20		SEDDB	10.1016/0016-7037(90)90441-M	RARE EARTH ELEMENTS OF PACIFIC PELAGIC SEDIMENTS	GEOCHIM COSMOCHIM ACTA	TOYODA, K; NAKAMURA, Y; MASUDA, A	KH72-02	31.8	144.017	-1				ICPOES	SEDIMENTARY	UNKNOWN	UNKNOWN	SILICICLASTIC									3.79				0.12	0.42
HAK7202-002/25-20		SEDDB	10.1016/0016-7037(90)90441-M	RARE EARTH ELEMENTS OF PACIFIC PELAGIC SEDIMENTS	GEOCHIM COSMOCHIM ACTA	TOYODA, K; NAKAMURA, Y; MASUDA, A	KH72-02	31.8	144.017	-1				INAA	SEDIMENTARY	UNKNOWN	UNKNOWN	SILICICLASTIC																		15.5		36.3			3.7	1.1		0.67					2.1
HAK7202-056/50-52		SEDDB	10.1016/0016-7037(90)90441-M	RARE EARTH ELEMENTS OF PACIFIC PELAGIC SEDIMENTS	GEOCHIM COSMOCHIM ACTA	TOYODA, K; NAKAMURA, Y; MASUDA, A	KH72-02	21.567	132.7	-1				ICPOES	SEDIMENTARY	UNKNOWN	UNKNOWN	SILICICLASTIC									1.5				0.2	0.76
HAK7202-056/50-52		SEDDB	10.1016/0016-7037(90)90441-M	RARE EARTH ELEMENTS OF PACIFIC PELAGIC SEDIMENTS	GEOCHIM COSMOCHIM ACTA	TOYODA, K; NAKAMURA, Y; MASUDA, A	KH72-02	21.567	132.7	-1				INAA	SEDIMENTARY	UNKNOWN	UNKNOWN	SILICICLASTIC																		43.7		95.9			8.6	2		1.4					3.8
HAK8002-002-008/37-39		SEDDB	10.1016/0016-7037(90)90441-M	RARE EARTH ELEMENTS OF PACIFIC PELAGIC SEDIMENTS	GEOCHIM COSMOCHIM ACTA	TOYODA, K; NAKAMURA, Y; MASUDA, A	KH80-03	38.05	-179.767	-1				ICPOES	SEDIMENTARY	UNKNOWN	UNKNOWN	SILICICLASTIC									1.04				0.08	0.21
HAK8002-002-008/37-39		SEDDB	10.1016/0016-7037(90)90441-M	RARE EARTH ELEMENTS OF PACIFIC PELAGIC SEDIMENTS	GEOCHIM COSMOCHIM ACTA	TOYODA, K; NAKAMURA, Y; MASUDA, A	KH80-03	38.05	-179.767	-1				INAA	SEDIMENTARY	UNKNOWN	UNKNOWN	SILICICLASTIC																		25.8		68.4			5	1.07							2.2
HAK8002-002-008/49-51		SEDDB	10.1016/0016-7037(90)90441-M	RARE EARTH ELEMENTS OF PACIFIC PELAGIC SEDIMENTS	GEOCHIM COSMOCHIM ACTA	TOYODA, K; NAKAMURA, Y; MASUDA, A	KH80-03	38.05	-179.767	-1				ICPOES	SEDIMENTARY	UNKNOWN	UNKNOWN	SILICICLASTIC									1				0.09	0.2
HAK8002-002-008/49-51		SEDDB	10.1016/0016-7037(90)90441-M	RARE EARTH ELEMENTS OF PACIFIC PELAGIC SEDIMENTS	GEOCHIM COSMOCHIM ACTA	TOYODA, K; NAKAMURA, Y; MASUDA, A	KH80-03	38.05	-179.767	-1				INAA	SEDIMENTARY	UNKNOWN	UNKNOWN	SILICICLASTIC																		28.7		69.4			5.1	1.13							2.4
HAK6804-029-002/50-52		SEDDB	10.1016/0016-7037(90)90441-M	RARE EARTH ELEMENTS OF PACIFIC PELAGIC SEDIMENTS	GEOCHIM COSMOCHIM ACTA	TOYODA, K; NAKAMURA, Y; MASUDA, A	KH68-04	-25.9	-170.333	-1				ICPOES	SEDIMENTARY	UNKNOWN	UNKNOWN	SILICICLASTIC									1.9				0.26	0.79
HAK6804-029-002/50-52		SEDDB	10.1016/0016-7037(90)90441-M	RARE EARTH ELEMENTS OF PACIFIC PELAGIC SEDIMENTS	GEOCHIM COSMOCHIM ACTA	TOYODA, K; NAKAMURA, Y; MASUDA, A	KH68-04	-25.9	-170.333	-1				INAA	SEDIMENTARY	UNKNOWN	UNKNOWN	SILICICLASTIC																		28.2		74.4			6.7	1.7		1.2					3.5
HAK6804-037-002/54-58		SEDDB	10.1016/0016-7037(90)90441-M	RARE EARTH ELEMENTS OF PACIFIC PELAGIC SEDIMENTS	GEOCHIM COSMOCHIM ACTA	TOYODA, K; NAKAMURA, Y; MASUDA, A	KH68-04	-46.017	-169.883	-1				ICPOES	SEDIMENTARY	UNKNOWN	UNKNOWN	SILICICLASTIC									2.65				0.1	0.088
HAK6804-037-002/54-58		SEDDB	10.1016/0016-7037(90)90441-M	RARE EARTH ELEMENTS OF PACIFIC PELAGIC SEDIMENTS	GEOCHIM COSMOCHIM ACTA	TOYODA, K; NAKAMURA, Y; MASUDA, A	KH68-04	-46.017	-169.883	-1				INAA	SEDIMENTARY	UNKNOWN	UNKNOWN	SILICICLASTIC																		28.9		70.4			6.5	1.4		0.96					2.7
HAK7002-009-003/50-52		SEDDB	10.1016/0016-7037(90)90441-M	RARE EARTH ELEMENTS OF PACIFIC PELAGIC SEDIMENTS	GEOCHIM COSMOCHIM ACTA	TOYODA, K; NAKAMURA, Y; MASUDA, A	KH70-02	17.1	-146.2	-1				ICPOES	SEDIMENTARY	UNKNOWN	UNKNOWN	SILICICLASTIC									1.09				0.085	1.36
HAK7002-009-003/50-52		SEDDB	10.1016/0016-7037(90)90441-M	RARE EARTH ELEMENTS OF PACIFIC PELAGIC SEDIMENTS	GEOCHIM COSMOCHIM ACTA	TOYODA, K; NAKAMURA, Y; MASUDA, A	KH70-02	17.1	-146.2	-1				INAA	SEDIMENTARY	UNKNOWN	UNKNOWN	SILICICLASTIC																		109		119			29	7.8		5.8					16.1
HAK7101-112-001/100-102		SEDDB	10.1016/0016-7037(90)90441-M	RARE EARTH ELEMENTS OF PACIFIC PELAGIC SEDIMENTS	GEOCHIM COSMOCHIM ACTA	TOYODA, K; NAKAMURA, Y; MASUDA, A	KH71-01	1.867	147.033	-1				ICPOES	SEDIMENTARY	UNKNOWN	UNKNOWN	SILICICLASTIC									2.77				0.18	0.72
HAK7101-112-001/100-102		SEDDB	10.1016/0016-7037(90)90441-M	RARE EARTH ELEMENTS OF PACIFIC PELAGIC SEDIMENTS	GEOCHIM COSMOCHIM ACTA	TOYODA, K; NAKAMURA, Y; MASUDA, A	KH71-01	1.867	147.033	-1				INAA	SEDIMENTARY	UNKNOWN	UNKNOWN	SILICICLASTIC																		28		54			6.2	1.7		1.1					2.8
HAK7105-010-002/50-52		SEDDB	10.1016/0016-7037(90)90441-M	RARE EARTH ELEMENTS OF PACIFIC PELAGIC SEDIMENTS	GEOCHIM COSMOCHIM ACTA	TOYODA, K; NAKAMURA, Y; MASUDA, A	KH71-01	-4.967	-146.05	-1				ICPOES	SEDIMENTARY	UNKNOWN	UNKNOWN	SILICICLASTIC									4.35				0.054	1.94
HAK7105-010-002/50-52		SEDDB	10.1016/0016-7037(90)90441-M	RARE EARTH ELEMENTS OF PACIFIC PELAGIC SEDIMENTS	GEOCHIM COSMOCHIM ACTA	TOYODA, K; NAKAMURA, Y; MASUDA, A	KH71-01	-4.967	-146.05	-1				INAA	SEDIMENTARY	UNKNOWN	UNKNOWN	SILICICLASTIC																		154		101			42.1	12.3		8.6					26.9
HAK7105-015-002/48-50		SEDDB	10.1016/0016-7037(90)90441-M	RARE EARTH ELEMENTS OF PACIFIC PELAGIC SEDIMENTS	GEOCHIM COSMOCHIM ACTA	TOYODA, K; NAKAMURA, Y; MASUDA, A	KH71-01	-20.383	-148.033	-1				ICPOES	SEDIMENTARY	UNKNOWN	UNKNOWN	SILICICLASTIC									3.54				2.5	4.01
HAK7105-015-002/48-50		SEDDB	10.1016/0016-7037(90)90441-M	RARE EARTH ELEMENTS OF PACIFIC PELAGIC SEDIMENTS	GEOCHIM COSMOCHIM ACTA	TOYODA, K; NAKAMURA, Y; MASUDA, A	KH71-01	-20.383	-148.033	-1				INAA	SEDIMENTARY	UNKNOWN	UNKNOWN	SILICICLASTIC																		192		139			47.1	11.1		7.9					18
HAK7202-058/106-108		SEDDB	10.1016/0016-7037(90)90441-M	RARE EARTH ELEMENTS OF PACIFIC PELAGIC SEDIMENTS	GEOCHIM COSMOCHIM ACTA	TOYODA, K; NAKAMURA, Y; MASUDA, A	KH72-02	22.883	129.217	-1				ICPOES	SEDIMENTARY	UNKNOWN	UNKNOWN	SILICICLASTIC									2.97				0.19	0.62
HAK7202-058/106-108		SEDDB	10.1016/0016-7037(90)90441-M	RARE EARTH ELEMENTS OF PACIFIC PELAGIC SEDIMENTS	GEOCHIM COSMOCHIM ACTA	TOYODA, K; NAKAMURA, Y; MASUDA, A	KH72-02	22.883	129.217	-1				INAA	SEDIMENTARY	UNKNOWN	UNKNOWN	SILICICLASTIC																		39.4		87.8			7.4	1.6		0.95					3.7
HAK7304-005/100-102		SEDDB	10.1016/0016-7037(90)90441-M	RARE EARTH ELEMENTS OF PACIFIC PELAGIC SEDIMENTS	GEOCHIM COSMOCHIM ACTA	TOYODA, K; NAKAMURA, Y; MASUDA, A	KH73-04	12.383	151.8	-1				ICPOES	SEDIMENTARY	UNKNOWN	UNKNOWN	SILICICLASTIC									1.13				0.29	1.05
HAK7304-005/100-102		SEDDB	10.1016/0016-7037(90)90441-M	RARE EARTH ELEMENTS OF PACIFIC PELAGIC SEDIMENTS	GEOCHIM COSMOCHIM ACTA	TOYODA, K; NAKAMURA, Y; MASUDA, A	KH73-04	12.383	151.8	-1				INAA	SEDIMENTARY	UNKNOWN	UNKNOWN	SILICICLASTIC																		53		126			12.5	3.1		2.1					5.8
HAK8002-002-005/20-24		SEDDB	10.1016/0016-7037(90)90441-M	RARE EARTH ELEMENTS OF PACIFIC PELAGIC SEDIMENTS	GEOCHIM COSMOCHIM ACTA	TOYODA, K; NAKAMURA, Y; MASUDA, A	KH80-03	40	153	-1				ICPOES	SEDIMENTARY	UNKNOWN	UNKNOWN	SILICICLASTIC									1.54				0.13	0.37
HAK8002-002-005/20-24		SEDDB	10.1016/0016-7037(90)90441-M	RARE EARTH ELEMENTS OF PACIFIC PELAGIC SEDIMENTS	GEOCHIM COSMOCHIM ACTA	TOYODA, K; NAKAMURA, Y; MASUDA, A	KH80-03	40	153	-1				INAA	SEDIMENTARY	UNKNOWN	UNKNOWN	SILICICLASTIC																		18.8		47.9			3.7								2.2
HAK6804-015-003/48-50		SEDDB	10.1016/0016-7037(90)90441-M	RARE EARTH ELEMENTS OF PACIFIC PELAGIC SEDIMENTS	GEOCHIM COSMOCHIM ACTA	TOYODA, K; NAKAMURA, Y; MASUDA, A	KH68-04	11.983	-169.967	-1				ICPOES	SEDIMENTARY	UNKNOWN	UNKNOWN	SILICICLASTIC									1.48				0.5	0.82
HAK6804-015-003/48-50		SEDDB	10.1016/0016-7037(90)90441-M	RARE EARTH ELEMENTS OF PACIFIC PELAGIC SEDIMENTS	GEOCHIM COSMOCHIM ACTA	TOYODA, K; NAKAMURA, Y; MASUDA, A	KH68-04	11.983	-169.967	-1				INAA	SEDIMENTARY	UNKNOWN	UNKNOWN	SILICICLASTIC																		61.4		91.6			14.9	4.1		2.9					8.6
HAK6804-015-003/108-111		SEDDB	10.1016/0016-7037(90)90441-M	RARE EARTH ELEMENTS OF PACIFIC PELAGIC SEDIMENTS	GEOCHIM COSMOCHIM ACTA	TOYODA, K; NAKAMURA, Y; MASUDA, A	KH68-04	11.983	-169.967	-1				ICPOES	SEDIMENTARY	UNKNOWN	UNKNOWN	SILICICLASTIC									1.56				0.6	0.89
HAK6804-015-003/108-111		SEDDB	10.1016/0016-7037(90)90441-M	RARE EARTH ELEMENTS OF PACIFIC PELAGIC SEDIMENTS	GEOCHIM COSMOCHIM ACTA	TOYODA, K; NAKAMURA, Y; MASUDA, A	KH68-04	11.983	-169.967	-1				INAA	SEDIMENTARY	UNKNOWN	UNKNOWN	SILICICLASTIC																		78.2		113			20.5	5.3		3.6					10.6
HAK7105-044/26-28		SEDDB	10.1016/0016-7037(90)90441-M	RARE EARTH ELEMENTS OF PACIFIC PELAGIC SEDIMENTS	GEOCHIM COSMOCHIM ACTA	TOYODA, K; NAKAMURA, Y; MASUDA, A	KH71-01	-21	-91	-1				ICPOES	SEDIMENTARY	UNKNOWN	UNKNOWN	SILICICLASTIC									4.75				1.11	2.65
HAK7105-044/26-28		SEDDB	10.1016/0016-7037(90)90441-M	RARE EARTH ELEMENTS OF PACIFIC PELAGIC SEDIMENTS	GEOCHIM COSMOCHIM ACTA	TOYODA, K; NAKAMURA, Y; MASUDA, A	KH71-01	-21	-91	-1				INAA	SEDIMENTARY	UNKNOWN	UNKNOWN	SILICICLASTIC																		153		185			37.1	9.45		7.1					21.1
HAK7202-002/40-45		SEDDB	10.1016/0016-7037(90)90441-M	RARE EARTH ELEMENTS OF PACIFIC PELAGIC SEDIMENTS	GEOCHIM COSMOCHIM ACTA	TOYODA, K; NAKAMURA, Y; MASUDA, A	KH72-02	31.8	144.017	-1				ICPOES	SEDIMENTARY	UNKNOWN	UNKNOWN	SILICICLASTIC									2.79				0.13	0.63
HAK7202-002/40-45		SEDDB	10.1016/0016-7037(90)90441-M	RARE EARTH ELEMENTS OF PACIFIC PELAGIC SEDIMENTS	GEOCHIM COSMOCHIM ACTA	TOYODA, K; NAKAMURA, Y; MASUDA, A	KH72-02	31.8	144.017	-1				INAA	SEDIMENTARY	UNKNOWN	UNKNOWN	SILICICLASTIC																		21.5		51			4.3	1.2		0.62					2.6
HAK7304-006/56-58		SEDDB	10.1016/0016-7037(90)90441-M	RARE EARTH ELEMENTS OF PACIFIC PELAGIC SEDIMENTS	GEOCHIM COSMOCHIM ACTA	TOYODA, K; NAKAMURA, Y; MASUDA, A	KH73-04	10.767	153.7	-1				ICPOES	SEDIMENTARY	UNKNOWN	UNKNOWN	SILICICLASTIC									1.24				0.25	0.9
HAK7304-006/56-58		SEDDB	10.1016/0016-7037(90)90441-M	RARE EARTH ELEMENTS OF PACIFIC PELAGIC SEDIMENTS	GEOCHIM COSMOCHIM ACTA	TOYODA, K; NAKAMURA, Y; MASUDA, A	KH73-04	10.767	153.7	-1				INAA	SEDIMENTARY	UNKNOWN	UNKNOWN	SILICICLASTIC																		36.2		86.2			7.9	2		1.5					4.7
HAK6804-020-002/80-84		SEDDB	10.1016/0016-7037(90)90441-M	RARE EARTH ELEMENTS OF PACIFIC PELAGIC SEDIMENTS	GEOCHIM COSMOCHIM ACTA	TOYODA, K; NAKAMURA, Y; MASUDA, A	KH68-04	-2.467	-170	-1				ICPOES	SEDIMENTARY	UNKNOWN	UNKNOWN	SILICICLASTIC									2.53				0.54	0.87
HAK6804-020-002/80-84		SEDDB	10.1016/0016-7037(90)90441-M	RARE EARTH ELEMENTS OF PACIFIC PELAGIC SEDIMENTS	GEOCHIM COSMOCHIM ACTA	TOYODA, K; NAKAMURA, Y; MASUDA, A	KH68-04	-2.467	-170	-1				INAA	SEDIMENTARY	UNKNOWN	UNKNOWN	SILICICLASTIC																		55.7		73			15.5	4.3		3.1					7.7
HAK6804-020-002/100-102		SEDDB	10.1016/0016-7037(90)90441-M	RARE EARTH ELEMENTS OF PACIFIC PELAGIC SEDIMENTS	GEOCHIM COSMOCHIM ACTA	TOYODA, K; NAKAMURA, Y; MASUDA, A	KH68-04	-2.467	-170	-1				ICPOES	SEDIMENTARY	UNKNOWN	UNKNOWN	SILICICLASTIC									2.69				0.53	1.03
HAK6804-020-002/100-102		SEDDB	10.1016/0016-7037(90)90441-M	RARE EARTH ELEMENTS OF PACIFIC PELAGIC SEDIMENTS	GEOCHIM COSMOCHIM ACTA	TOYODA, K; NAKAMURA, Y; MASUDA, A	KH68-04	-2.467	-170	-1				INAA	SEDIMENTARY	UNKNOWN	UNKNOWN	SILICICLASTIC																		55.8		72.9			14.9	3.8		2.9					8.3
HAK6804-029-002/100-105		SEDDB	10.1016/0016-7037(90)90441-M	RARE EARTH ELEMENTS OF PACIFIC PELAGIC SEDIMENTS	GEOCHIM COSMOCHIM ACTA	TOYODA, K; NAKAMURA, Y; MASUDA, A	KH68-04	-25.9	-170.333	-1				ICPOES	SEDIMENTARY	UNKNOWN	UNKNOWN	SILICICLASTIC									2.59				0.23	0.8
HAK6804-029-002/100-105		SEDDB	10.1016/0016-7037(90)90441-M	RARE EARTH ELEMENTS OF PACIFIC PELAGIC SEDIMENTS	GEOCHIM COSMOCHIM ACTA	TOYODA, K; NAKAMURA, Y; MASUDA, A	KH68-04	-25.9	-170.333	-1				INAA	SEDIMENTARY	UNKNOWN	UNKNOWN	SILICICLASTIC																		25.9		65.6			6.3	1.8		1.1					3.2
HAK7002-009-003/100-102		SEDDB	10.1016/0016-7037(90)90441-M	RARE EARTH ELEMENTS OF PACIFIC PELAGIC SEDIMENTS	GEOCHIM COSMOCHIM ACTA	TOYODA, K; NAKAMURA, Y; MASUDA, A	KH70-02	17.1	-146.2	-1				ICPOES	SEDIMENTARY	UNKNOWN	UNKNOWN	SILICICLASTIC									2.35				0.92	1.23
HAK7002-009-003/100-102		SEDDB	10.1016/0016-7037(90)90441-M	RARE EARTH ELEMENTS OF PACIFIC PELAGIC SEDIMENTS	GEOCHIM COSMOCHIM ACTA	TOYODA, K; NAKAMURA, Y; MASUDA, A	KH70-02	17.1	-146.2	-1				INAA	SEDIMENTARY	UNKNOWN	UNKNOWN	SILICICLASTIC																		125		138			37.3	8.6		5.9					15.7
HAK7101-112-002/100-102		SEDDB	10.1016/0016-7037(90)90441-M	RARE EARTH ELEMENTS OF PACIFIC PELAGIC SEDIMENTS	GEOCHIM COSMOCHIM ACTA	TOYODA, K; NAKAMURA, Y; MASUDA, A	KH71-01	1.883	147	-1				ICPOES	SEDIMENTARY	UNKNOWN	UNKNOWN	SILICICLASTIC									3.53				0.17	0.16
HAK7101-112-002/100-102		SEDDB	10.1016/0016-7037(90)90441-M	RARE EARTH ELEMENTS OF PACIFIC PELAGIC SEDIMENTS	GEOCHIM COSMOCHIM ACTA	TOYODA, K; NAKAMURA, Y; MASUDA, A	KH71-01	1.883	147	-1				INAA	SEDIMENTARY	UNKNOWN	UNKNOWN	SILICICLASTIC																		26.8		53.8			6.4	1.7		1.2					2.8
HAK7105-010-002/100-102		SEDDB	10.1016/0016-7037(90)90441-M	RARE EARTH ELEMENTS OF PACIFIC PELAGIC SEDIMENTS	GEOCHIM COSMOCHIM ACTA	TOYODA, K; NAKAMURA, Y; MASUDA, A	KH71-01	-4.967	-146.05	-1				ICPOES	SEDIMENTARY	UNKNOWN	UNKNOWN	SILICICLASTIC									4.18				1.46	1.67
HAK7105-010-002/100-102		SEDDB	10.1016/0016-7037(90)90441-M	RARE EARTH ELEMENTS OF PACIFIC PELAGIC SEDIMENTS	GEOCHIM COSMOCHIM ACTA	TOYODA, K; NAKAMURA, Y; MASUDA, A	KH71-01	-4.967	-146.05	-1				INAA	SEDIMENTARY	UNKNOWN	UNKNOWN	SILICICLASTIC																		164		102			44.5	12.8		9.6					28.9
HAK7202-058/120-122		SEDDB	10.1016/0016-7037(90)90441-M	RARE EARTH ELEMENTS OF PACIFIC PELAGIC SEDIMENTS	GEOCHIM COSMOCHIM ACTA	TOYODA, K; NAKAMURA, Y; MASUDA, A	KH72-02	22.883	129.217	-1				ICPOES	SEDIMENTARY	UNKNOWN	UNKNOWN	SILICICLASTIC									0.6				0.13	0.2
HAK7202-058/120-122		SEDDB	10.1016/0016-7037(90)90441-M	RARE EARTH ELEMENTS OF PACIFIC PELAGIC SEDIMENTS	GEOCHIM COSMOCHIM ACTA	TOYODA, K; NAKAMURA, Y; MASUDA, A	KH72-02	22.883	129.217	-1				INAA	SEDIMENTARY	UNKNOWN	UNKNOWN	SILICICLASTIC																				86				1.5		0.96					2.9
HAK7304-009/50-52		SEDDB	10.1016/0016-7037(90)90441-M	RARE EARTH ELEMENTS OF PACIFIC PELAGIC SEDIMENTS	GEOCHIM COSMOCHIM ACTA	TOYODA, K; NAKAMURA, Y; MASUDA, A	KH73-04	-8	172.817	-1				ICPOES	SEDIMENTARY	UNKNOWN	UNKNOWN	SILICICLASTIC									4				0.54	1.14
HAK7304-009/50-52		SEDDB	10.1016/0016-7037(90)90441-M	RARE EARTH ELEMENTS OF PACIFIC PELAGIC SEDIMENTS	GEOCHIM COSMOCHIM ACTA	TOYODA, K; NAKAMURA, Y; MASUDA, A	KH73-04	-8	172.817	-1				INAA	SEDIMENTARY	UNKNOWN	UNKNOWN	SILICICLASTIC																		48.1		62.1			11.8	3.7		2.9					7.7
HAK8002-002-006/33-35		SEDDB	10.1016/0016-7037(90)90441-M	RARE EARTH ELEMENTS OF PACIFIC PELAGIC SEDIMENTS	GEOCHIM COSMOCHIM ACTA	TOYODA, K; NAKAMURA, Y; MASUDA, A	KH80-03	39.05	166	-1				ICPOES	SEDIMENTARY	UNKNOWN	UNKNOWN	SILICICLASTIC									1.07				0.1	0.39
HAK8002-002-006/33-35		SEDDB	10.1016/0016-7037(90)90441-M	RARE EARTH ELEMENTS OF PACIFIC PELAGIC SEDIMENTS	GEOCHIM COSMOCHIM ACTA	TOYODA, K; NAKAMURA, Y; MASUDA, A	KH80-03	39.05	166	-1				INAA	SEDIMENTARY	UNKNOWN	UNKNOWN	SILICICLASTIC																		24.7		59.3			4.4	1.08							2.1
HAK8401-003-SAMPLE		SEDDB	10.1016/0016-7037(90)90441-M	RARE EARTH ELEMENTS OF PACIFIC PELAGIC SEDIMENTS	GEOCHIM COSMOCHIM ACTA	TOYODA, K; NAKAMURA, Y; MASUDA, A	KH84-3	26.067	144.317	-1				ICPOES	SEDIMENTARY	UNKNOWN	UNKNOWN	SILICICLASTIC									3.18					0.81
HAK8401-003-SAMPLE		SEDDB	10.1016/0016-7037(90)90441-M	RARE EARTH ELEMENTS OF PACIFIC PELAGIC SEDIMENTS	GEOCHIM COSMOCHIM ACTA	TOYODA, K; NAKAMURA, Y; MASUDA, A	KH84-3	26.067	144.317	-1				INAA	SEDIMENTARY	UNKNOWN	UNKNOWN	SILICICLASTIC																		17		34.8			4.5	1.3		6.2					2.6
HAK6804-022-002/50-52		SEDDB	10.1016/0016-7037(90)90441-M	RARE EARTH ELEMENTS OF PACIFIC PELAGIC SEDIMENTS	GEOCHIM COSMOCHIM ACTA	TOYODA, K; NAKAMURA, Y; MASUDA, A	KH68-04	-10.95	-169.983	-1				ICPOES	SEDIMENTARY	UNKNOWN	UNKNOWN	SILICICLASTIC									5.29				0.43	0.19
HAK6804-022-002/50-52		SEDDB	10.1016/0016-7037(90)90441-M	RARE EARTH ELEMENTS OF PACIFIC PELAGIC SEDIMENTS	GEOCHIM COSMOCHIM ACTA	TOYODA, K; NAKAMURA, Y; MASUDA, A	KH68-04	-10.95	-169.983	-1				INAA	SEDIMENTARY	UNKNOWN	UNKNOWN	SILICICLASTIC																		44.6		99.7			10	3.5		1.2					3.7
HAK6804-025-002/78-82		SEDDB	10.1016/0016-7037(90)90441-M	RARE EARTH ELEMENTS OF PACIFIC PELAGIC SEDIMENTS	GEOCHIM COSMOCHIM ACTA	TOYODA, K; NAKAMURA, Y; MASUDA, A	KH68-04	-19.983	-170.033	-1				ICPOES	SEDIMENTARY	UNKNOWN	UNKNOWN	SILICICLASTIC									2.38				0.41	0.69
HAK6804-025-002/78-82		SEDDB	10.1016/0016-7037(90)90441-M	RARE EARTH ELEMENTS OF PACIFIC PELAGIC SEDIMENTS	GEOCHIM COSMOCHIM ACTA	TOYODA, K; NAKAMURA, Y; MASUDA, A	KH68-04	-19.983	-170.033	-1				INAA	SEDIMENTARY	UNKNOWN	UNKNOWN	SILICICLASTIC																		23.4		64.8			5.7	1.7		0.9					3.3
HAK6804-031-003/90-94		SEDDB	10.1016/0016-7037(90)90441-M	RARE EARTH ELEMENTS OF PACIFIC PELAGIC SEDIMENTS	GEOCHIM COSMOCHIM ACTA	TOYODA, K; NAKAMURA, Y; MASUDA, A	KH68-04	-32.15	-169.933	-1				ICPOES	SEDIMENTARY	UNKNOWN	UNKNOWN	SILICICLASTIC									1.33				0.14	0.47
HAK6804-031-003/90-94		SEDDB	10.1016/0016-7037(90)90441-M	RARE EARTH ELEMENTS OF PACIFIC PELAGIC SEDIMENTS	GEOCHIM COSMOCHIM ACTA	TOYODA, K; NAKAMURA, Y; MASUDA, A	KH68-04	-32.15	-169.933	-1				INAA	SEDIMENTARY	UNKNOWN	UNKNOWN	SILICICLASTIC																		25.2		68.6			4.8	1.5		0.92					2.7
HAK6804-037-002/104-108		SEDDB	10.1016/0016-7037(90)90441-M	RARE EARTH ELEMENTS OF PACIFIC PELAGIC SEDIMENTS	GEOCHIM COSMOCHIM ACTA	TOYODA, K; NAKAMURA, Y; MASUDA, A	KH68-04	-46.017	-169.883	-1				ICPOES	SEDIMENTARY	UNKNOWN	UNKNOWN	SILICICLASTIC									2.24				0.16	0.1
HAK6804-037-002/104-108		SEDDB	10.1016/0016-7037(90)90441-M	RARE EARTH ELEMENTS OF PACIFIC PELAGIC SEDIMENTS	GEOCHIM COSMOCHIM ACTA	TOYODA, K; NAKAMURA, Y; MASUDA, A	KH68-04	-46.017	-169.883	-1				INAA	SEDIMENTARY	UNKNOWN	UNKNOWN	SILICICLASTIC																		25.1		59.2			5.4	1.3		1					2.4
HAK7105-002-002/100-102		SEDDB	10.1016/0016-7037(90)90441-M	RARE EARTH ELEMENTS OF PACIFIC PELAGIC SEDIMENTS	GEOCHIM COSMOCHIM ACTA	TOYODA, K; NAKAMURA, Y; MASUDA, A	KH71-01	16.983	-146.05	-1				ICPOES	SEDIMENTARY	UNKNOWN	UNKNOWN	SILICICLASTIC									8.36				0.13	0.11
HAK7105-002-002/100-102		SEDDB	10.1016/0016-7037(90)90441-M	RARE EARTH ELEMENTS OF PACIFIC PELAGIC SEDIMENTS	GEOCHIM COSMOCHIM ACTA	TOYODA, K; NAKAMURA, Y; MASUDA, A	KH71-01	16.983	-146.05	-1				INAA	SEDIMENTARY	UNKNOWN	UNKNOWN	SILICICLASTIC																		15.5		33.7			3.2	1.03		0.55					2
HAK7105-015-002/3-6		SEDDB	10.1016/0016-7037(90)90441-M	RARE EARTH ELEMENTS OF PACIFIC PELAGIC SEDIMENTS	GEOCHIM COSMOCHIM ACTA	TOYODA, K; NAKAMURA, Y; MASUDA, A	KH71-01	-20.383	-148.033	-1				ICPOES	SEDIMENTARY	UNKNOWN	UNKNOWN	SILICICLASTIC									5.66				1.1	1.6
HAK7105-015-002/3-6		SEDDB	10.1016/0016-7037(90)90441-M	RARE EARTH ELEMENTS OF PACIFIC PELAGIC SEDIMENTS	GEOCHIM COSMOCHIM ACTA	TOYODA, K; NAKAMURA, Y; MASUDA, A	KH71-01	-20.383	-148.033	-1				INAA	SEDIMENTARY	UNKNOWN	UNKNOWN	SILICICLASTIC																		133		176			34.5	10.1		6.9					18.7
HAK7304-005/50-52		SEDDB	10.1016/0016-7037(90)90441-M	RARE EARTH ELEMENTS OF PACIFIC PELAGIC SEDIMENTS	GEOCHIM COSMOCHIM ACTA	TOYODA, K; NAKAMURA, Y; MASUDA, A	KH73-04	12.383	151.8	-1				ICPOES	SEDIMENTARY	UNKNOWN	UNKNOWN	SILICICLASTIC									1.21				0.3	1.09
HAK7304-005/50-52		SEDDB	10.1016/0016-7037(90)90441-M	RARE EARTH ELEMENTS OF PACIFIC PELAGIC SEDIMENTS	GEOCHIM COSMOCHIM ACTA	TOYODA, K; NAKAMURA, Y; MASUDA, A	KH73-04	12.383	151.8	-1				INAA	SEDIMENTARY	UNKNOWN	UNKNOWN	SILICICLASTIC																		51.9		115			11.9	3.1		2.1					5.6
HAK7602-003/98-100		SEDDB	10.1016/0016-7037(90)90441-M	RARE EARTH ELEMENTS OF PACIFIC PELAGIC SEDIMENTS	GEOCHIM COSMOCHIM ACTA	TOYODA, K; NAKAMURA, Y; MASUDA, A	KH76-02	24.45	132.583	-1				ICPOES	SEDIMENTARY	UNKNOWN	UNKNOWN	SILICICLASTIC									1.16				0.14	0.4
HAK7602-003/98-100		SEDDB	10.1016/0016-7037(90)90441-M	RARE EARTH ELEMENTS OF PACIFIC PELAGIC SEDIMENTS	GEOCHIM COSMOCHIM ACTA	TOYODA, K; NAKAMURA, Y; MASUDA, A	KH76-02	24.45	132.583	-1				INAA	SEDIMENTARY	UNKNOWN	UNKNOWN	SILICICLASTIC																		37		83.1			6.3	1.5		1.2					2.7
ODP0125-0784A-021R-002/65-67		SEDDB	10.2973/odp.proc.ir.125.1990	SITE 784	PROC ODP, INIT REPORTS	FRYER, P; PEARCE, J; HELING, D; HOBART, M; ISHII, T; JOHNSON, L; LAGABRIELLE, Y; MCCOY, F; MAEKAWA, H; MARLOW, M; MILNER, G; MOTTL, M; STOKKING, L; MURTON, B; PHIPPS, S; RIGSBY, C; SABODA, K; STABELL, B; VAN DER LAAN, S; XU, Y; STEWART, S; ALI, J; ARCULUS, R; BOLLOTTI, D; BURKE, M; CIAMPO, G; HAGGERTY, J; HASTON, R	ODP125	30.908	141.763	-1				COUL	SEDIMENTARY	UNKNOWN	UNKNOWN	SILICICLASTIC																			0.1
ODP0125-0784A-041R-001/70-72		SEDDB	10.2973/odp.proc.ir.125.1990	SITE 784	PROC ODP, INIT REPORTS	FRYER, P; PEARCE, J; HELING, D; HOBART, M; ISHII, T; JOHNSON, L; LAGABRIELLE, Y; MCCOY, F; MAEKAWA, H; MARLOW, M; MILNER, G; MOTTL, M; STOKKING, L; MURTON, B; PHIPPS, S; RIGSBY, C; SABODA, K; STABELL, B; VAN DER LAAN, S; XU, Y; STEWART, S; ALI, J; ARCULUS, R; BOLLOTTI, D; BURKE, M; CIAMPO, G; HAGGERTY, J; HASTON, R	ODP125	30.908	141.763	-1				COUL	SEDIMENTARY	UNKNOWN	UNKNOWN	SILICICLASTIC																			0.3
ODP0125-0784A-023R-002/104-106		SEDDB	10.2973/odp.proc.ir.125.1990	SITE 784	PROC ODP, INIT REPORTS	FRYER, P; PEARCE, J; HELING, D; HOBART, M; ISHII, T; JOHNSON, L; LAGABRIELLE, Y; MCCOY, F; MAEKAWA, H; MARLOW, M; MILNER, G; MOTTL, M; STOKKING, L; MURTON, B; PHIPPS, S; RIGSBY, C; SABODA, K; STABELL, B; VAN DER LAAN, S; XU, Y; STEWART, S; ALI, J; ARCULUS, R; BOLLOTTI, D; BURKE, M; CIAMPO, G; HAGGERTY, J; HASTON, R	ODP125	30.908	141.763	-1				COUL	SEDIMENTARY	UNKNOWN	UNKNOWN	SILICICLASTIC																			0.2
ODP0125-0784A-016R-002/56-58		SEDDB	10.2973/odp.proc.ir.125.1990	SITE 784	PROC ODP, INIT REPORTS	FRYER, P; PEARCE, J; HELING, D; HOBART, M; ISHII, T; JOHNSON, L; LAGABRIELLE, Y; MCCOY, F; MAEKAWA, H; MARLOW, M; MILNER, G; MOTTL, M; STOKKING, L; MURTON, B; PHIPPS, S; RIGSBY, C; SABODA, K; STABELL, B; VAN DER LAAN, S; XU, Y; STEWART, S; ALI, J; ARCULUS, R; BOLLOTTI, D; BURKE, M; CIAMPO, G; HAGGERTY, J; HASTON, R	ODP125	30.908	141.763	-1				COUL	SEDIMENTARY	UNKNOWN	UNKNOWN	SILICICLASTIC																			0.1
ODP0125-0784A-020R-002/120-121		SEDDB	10.2973/odp.proc.ir.125.1990	SITE 784	PROC ODP, INIT REPORTS	FRYER, P; PEARCE, J; HELING, D; HOBART, M; ISHII, T; JOHNSON, L; LAGABRIELLE, Y; MCCOY, F; MAEKAWA, H; MARLOW, M; MILNER, G; MOTTL, M; STOKKING, L; MURTON, B; PHIPPS, S; RIGSBY, C; SABODA, K; STABELL, B; VAN DER LAAN, S; XU, Y; STEWART, S; ALI, J; ARCULUS, R; BOLLOTTI, D; BURKE, M; CIAMPO, G; HAGGERTY, J; HASTON, R	ODP125	30.908	141.763	-1				COUL	SEDIMENTARY	UNKNOWN	UNKNOWN	SILICICLASTIC																			0.1
ODP0125-0784A-001R-001/74-76		SEDDB	10.2973/odp.proc.ir.125.1990	SITE 784	PROC ODP, INIT REPORTS	FRYER, P; PEARCE, J; HELING, D; HOBART, M; ISHII, T; JOHNSON, L; LAGABRIELLE, Y; MCCOY, F; MAEKAWA, H; MARLOW, M; MILNER, G; MOTTL, M; STOKKING, L; MURTON, B; PHIPPS, S; RIGSBY, C; SABODA, K; STABELL, B; VAN DER LAAN, S; XU, Y; STEWART, S; ALI, J; ARCULUS, R; BOLLOTTI, D; BURKE, M; CIAMPO, G; HAGGERTY, J; HASTON, R	ODP125	30.908	141.763	-1	0.0118		1.806	COUL	SEDIMENTARY	UNKNOWN	UNKNOWN	SILICICLASTIC																			0.8
ODP0125-0784A-004R-002/31-33		SEDDB	10.2973/odp.proc.ir.125.1990	SITE 784	PROC ODP, INIT REPORTS	FRYER, P; PEARCE, J; HELING, D; HOBART, M; ISHII, T; JOHNSON, L; LAGABRIELLE, Y; MCCOY, F; MAEKAWA, H; MARLOW, M; MILNER, G; MOTTL, M; STOKKING, L; MURTON, B; PHIPPS, S; RIGSBY, C; SABODA, K; STABELL, B; VAN DER LAAN, S; XU, Y; STEWART, S; ALI, J; ARCULUS, R; BOLLOTTI, D; BURKE, M; CIAMPO, G; HAGGERTY, J; HASTON, R	ODP125	30.908	141.763	-1	0.0118		1.806	COUL	SEDIMENTARY	UNKNOWN	UNKNOWN	SILICICLASTIC																			0.1
ODP0125-0784A-007R-002/65-67		SEDDB	10.2973/odp.proc.ir.125.1990	SITE 784	PROC ODP, INIT REPORTS	FRYER, P; PEARCE, J; HELING, D; HOBART, M; ISHII, T; JOHNSON, L; LAGABRIELLE, Y; MCCOY, F; MAEKAWA, H; MARLOW, M; MILNER, G; MOTTL, M; STOKKING, L; MURTON, B; PHIPPS, S; RIGSBY, C; SABODA, K; STABELL, B; VAN DER LAAN, S; XU, Y; STEWART, S; ALI, J; ARCULUS, R; BOLLOTTI, D; BURKE, M; CIAMPO, G; HAGGERTY, J; HASTON, R	ODP125	30.908	141.763	-1	1.806		5.332	COUL	SEDIMENTARY	UNKNOWN	UNKNOWN	SILICICLASTIC																			0.2
ODP0125-0784A-034R-002/31-33		SEDDB	10.2973/odp.proc.ir.125.1990	SITE 784	PROC ODP, INIT REPORTS	FRYER, P; PEARCE, J; HELING, D; HOBART, M; ISHII, T; JOHNSON, L; LAGABRIELLE, Y; MCCOY, F; MAEKAWA, H; MARLOW, M; MILNER, G; MOTTL, M; STOKKING, L; MURTON, B; PHIPPS, S; RIGSBY, C; SABODA, K; STABELL, B; VAN DER LAAN, S; XU, Y; STEWART, S; ALI, J; ARCULUS, R; BOLLOTTI, D; BURKE, M; CIAMPO, G; HAGGERTY, J; HASTON, R	ODP125	30.908	141.763	-1				COUL	SEDIMENTARY	UNKNOWN	UNKNOWN	SILICICLASTIC																			0.1
ODP0125-0784A-035R-002/22-24		SEDDB	10.2973/odp.proc.ir.125.1990	SITE 784	PROC ODP, INIT REPORTS	FRYER, P; PEARCE, J; HELING, D; HOBART, M; ISHII, T; JOHNSON, L; LAGABRIELLE, Y; MCCOY, F; MAEKAWA, H; MARLOW, M; MILNER, G; MOTTL, M; STOKKING, L; MURTON, B; PHIPPS, S; RIGSBY, C; SABODA, K; STABELL, B; VAN DER LAAN, S; XU, Y; STEWART, S; ALI, J; ARCULUS, R; BOLLOTTI, D; BURKE, M; CIAMPO, G; HAGGERTY, J; HASTON, R	ODP125	30.908	141.763	-1				COUL	SEDIMENTARY	UNKNOWN	UNKNOWN	SILICICLASTIC																			11
ODP0125-0784A-002R-001/5-7		SEDDB	10.2973/odp.proc.ir.125.1990	SITE 784	PROC ODP, INIT REPORTS	FRYER, P; PEARCE, J; HELING, D; HOBART, M; ISHII, T; JOHNSON, L; LAGABRIELLE, Y; MCCOY, F; MAEKAWA, H; MARLOW, M; MILNER, G; MOTTL, M; STOKKING, L; MURTON, B; PHIPPS, S; RIGSBY, C; SABODA, K; STABELL, B; VAN DER LAAN, S; XU, Y; STEWART, S; ALI, J; ARCULUS, R; BOLLOTTI, D; BURKE, M; CIAMPO, G; HAGGERTY, J; HASTON, R	ODP125	30.908	141.763	-1	0.0118		1.806	COUL	SEDIMENTARY	UNKNOWN	UNKNOWN	SILICICLASTIC																			0.3
ODP0125-0784A-009R-002/85-87		SEDDB	10.2973/odp.proc.ir.125.1990	SITE 784	PROC ODP, INIT REPORTS	FRYER, P; PEARCE, J; HELING, D; HOBART, M; ISHII, T; JOHNSON, L; LAGABRIELLE, Y; MCCOY, F; MAEKAWA, H; MARLOW, M; MILNER, G; MOTTL, M; STOKKING, L; MURTON, B; PHIPPS, S; RIGSBY, C; SABODA, K; STABELL, B; VAN DER LAAN, S; XU, Y; STEWART, S; ALI, J; ARCULUS, R; BOLLOTTI, D; BURKE, M; CIAMPO, G; HAGGERTY, J; HASTON, R	ODP125	30.908	141.763	-1	1.806		5.332	COUL	SEDIMENTARY	UNKNOWN	UNKNOWN	SILICICLASTIC																			0.1
ODP0125-0784A-039R-002/83-85		SEDDB	10.2973/odp.proc.ir.125.1990	SITE 784	PROC ODP, INIT REPORTS	FRYER, P; PEARCE, J; HELING, D; HOBART, M; ISHII, T; JOHNSON, L; LAGABRIELLE, Y; MCCOY, F; MAEKAWA, H; MARLOW, M; MILNER, G; MOTTL, M; STOKKING, L; MURTON, B; PHIPPS, S; RIGSBY, C; SABODA, K; STABELL, B; VAN DER LAAN, S; XU, Y; STEWART, S; ALI, J; ARCULUS, R; BOLLOTTI, D; BURKE, M; CIAMPO, G; HAGGERTY, J; HASTON, R	ODP125	30.908	141.763	-1				COUL	SEDIMENTARY	UNKNOWN	UNKNOWN	SILICICLASTIC																			0.3
ODP0125-0784A-024R-002/41-43		SEDDB	10.2973/odp.proc.ir.125.1990	SITE 784	PROC ODP, INIT REPORTS	FRYER, P; PEARCE, J; HELING, D; HOBART, M; ISHII, T; JOHNSON, L; LAGABRIELLE, Y; MCCOY, F; MAEKAWA, H; MARLOW, M; MILNER, G; MOTTL, M; STOKKING, L; MURTON, B; PHIPPS, S; RIGSBY, C; SABODA, K; STABELL, B; VAN DER LAAN, S; XU, Y; STEWART, S; ALI, J; ARCULUS, R; BOLLOTTI, D; BURKE, M; CIAMPO, G; HAGGERTY, J; HASTON, R	ODP125	30.908	141.763	-1				COUL	SEDIMENTARY	UNKNOWN	UNKNOWN	SILICICLASTIC																			0.2
ODP0125-0784A-008R-002/106-108		SEDDB	10.2973/odp.proc.ir.125.1990	SITE 784	PROC ODP, INIT REPORTS	FRYER, P; PEARCE, J; HELING, D; HOBART, M; ISHII, T; JOHNSON, L; LAGABRIELLE, Y; MCCOY, F; MAEKAWA, H; MARLOW, M; MILNER, G; MOTTL, M; STOKKING, L; MURTON, B; PHIPPS, S; RIGSBY, C; SABODA, K; STABELL, B; VAN DER LAAN, S; XU, Y; STEWART, S; ALI, J; ARCULUS, R; BOLLOTTI, D; BURKE, M; CIAMPO, G; HAGGERTY, J; HASTON, R	ODP125	30.908	141.763	-1	1.806		5.332	COUL	SEDIMENTARY	UNKNOWN	UNKNOWN	SILICICLASTIC																			0.8
ODP0125-0784A-012R-002/44-46		SEDDB	10.2973/odp.proc.ir.125.1990	SITE 784	PROC ODP, INIT REPORTS	FRYER, P; PEARCE, J; HELING, D; HOBART, M; ISHII, T; JOHNSON, L; LAGABRIELLE, Y; MCCOY, F; MAEKAWA, H; MARLOW, M; MILNER, G; MOTTL, M; STOKKING, L; MURTON, B; PHIPPS, S; RIGSBY, C; SABODA, K; STABELL, B; VAN DER LAAN, S; XU, Y; STEWART, S; ALI, J; ARCULUS, R; BOLLOTTI, D; BURKE, M; CIAMPO, G; HAGGERTY, J; HASTON, R	ODP125	30.908	141.763	-1	1.806		5.332	COUL	SEDIMENTARY	UNKNOWN	UNKNOWN	SILICICLASTIC																			0.1
ODP0125-0784A-013R-001/36-38		SEDDB	10.2973/odp.proc.ir.125.1990	SITE 784	PROC ODP, INIT REPORTS	FRYER, P; PEARCE, J; HELING, D; HOBART, M; ISHII, T; JOHNSON, L; LAGABRIELLE, Y; MCCOY, F; MAEKAWA, H; MARLOW, M; MILNER, G; MOTTL, M; STOKKING, L; MURTON, B; PHIPPS, S; RIGSBY, C; SABODA, K; STABELL, B; VAN DER LAAN, S; XU, Y; STEWART, S; ALI, J; ARCULUS, R; BOLLOTTI, D; BURKE, M; CIAMPO, G; HAGGERTY, J; HASTON, R	ODP125	30.908	141.763	-1				COUL	SEDIMENTARY	UNKNOWN	UNKNOWN	SILICICLASTIC																			0.1
ODP0125-0784A-031R-002/83-86		SEDDB	10.2973/odp.proc.ir.125.1990	SITE 784	PROC ODP, INIT REPORTS	FRYER, P; PEARCE, J; HELING, D; HOBART, M; ISHII, T; JOHNSON, L; LAGABRIELLE, Y; MCCOY, F; MAEKAWA, H; MARLOW, M; MILNER, G; MOTTL, M; STOKKING, L; MURTON, B; PHIPPS, S; RIGSBY, C; SABODA, K; STABELL, B; VAN DER LAAN, S; XU, Y; STEWART, S; ALI, J; ARCULUS, R; BOLLOTTI, D; BURKE, M; CIAMPO, G; HAGGERTY, J; HASTON, R	ODP125	30.908	141.763	-1				COUL	SEDIMENTARY	UNKNOWN	UNKNOWN	SILICICLASTIC																			0.3
ODP0125-0784A-015R-002/56-58		SEDDB	10.2973/odp.proc.ir.125.1990	SITE 784	PROC ODP, INIT REPORTS	FRYER, P; PEARCE, J; HELING, D; HOBART, M; ISHII, T; JOHNSON, L; LAGABRIELLE, Y; MCCOY, F; MAEKAWA, H; MARLOW, M; MILNER, G; MOTTL, M; STOKKING, L; MURTON, B; PHIPPS, S; RIGSBY, C; SABODA, K; STABELL, B; VAN DER LAAN, S; XU, Y; STEWART, S; ALI, J; ARCULUS, R; BOLLOTTI, D; BURKE, M; CIAMPO, G; HAGGERTY, J; HASTON, R	ODP125	30.908	141.763	-1				COUL	SEDIMENTARY	UNKNOWN	UNKNOWN	SILICICLASTIC																			0.1
ODP0125-0784A-043R-002/98-100		SEDDB	10.2973/odp.proc.ir.125.1990	SITE 784	PROC ODP, INIT REPORTS	FRYER, P; PEARCE, J; HELING, D; HOBART, M; ISHII, T; JOHNSON, L; LAGABRIELLE, Y; MCCOY, F; MAEKAWA, H; MARLOW, M; MILNER, G; MOTTL, M; STOKKING, L; MURTON, B; PHIPPS, S; RIGSBY, C; SABODA, K; STABELL, B; VAN DER LAAN, S; XU, Y; STEWART, S; ALI, J; ARCULUS, R; BOLLOTTI, D; BURKE, M; CIAMPO, G; HAGGERTY, J; HASTON, R	ODP125	30.908	141.763	-1				COUL	SEDIMENTARY	UNKNOWN	UNKNOWN	SILICICLASTIC																			0.7
ODP0125-0784A-014R-002/63-65		SEDDB	10.2973/odp.proc.ir.125.1990	SITE 784	PROC ODP, INIT REPORTS	FRYER, P; PEARCE, J; HELING, D; HOBART, M; ISHII, T; JOHNSON, L; LAGABRIELLE, Y; MCCOY, F; MAEKAWA, H; MARLOW, M; MILNER, G; MOTTL, M; STOKKING, L; MURTON, B; PHIPPS, S; RIGSBY, C; SABODA, K; STABELL, B; VAN DER LAAN, S; XU, Y; STEWART, S; ALI, J; ARCULUS, R; BOLLOTTI, D; BURKE, M; CIAMPO, G; HAGGERTY, J; HASTON, R	ODP125	30.908	141.763	-1				COUL	SEDIMENTARY	UNKNOWN	UNKNOWN	SILICICLASTIC																			0
ODP0125-0784A-026R-002/40-42		SEDDB	10.2973/odp.proc.ir.125.1990	SITE 784	PROC ODP, INIT REPORTS	FRYER, P; PEARCE, J; HELING, D; HOBART, M; ISHII, T; JOHNSON, L; LAGABRIELLE, Y; MCCOY, F; MAEKAWA, H; MARLOW, M; MILNER, G; MOTTL, M; STOKKING, L; MURTON, B; PHIPPS, S; RIGSBY, C; SABODA, K; STABELL, B; VAN DER LAAN, S; XU, Y; STEWART, S; ALI, J; ARCULUS, R; BOLLOTTI, D; BURKE, M; CIAMPO, G; HAGGERTY, J; HASTON, R	ODP125	30.908	141.763	-1				COUL	SEDIMENTARY	UNKNOWN	UNKNOWN	SILICICLASTIC																			0.1
ODP0125-0784A-028R-002/86-88		SEDDB	10.2973/odp.proc.ir.125.1990	SITE 784	PROC ODP, INIT REPORTS	FRYER, P; PEARCE, J; HELING, D; HOBART, M; ISHII, T; JOHNSON, L; LAGABRIELLE, Y; MCCOY, F; MAEKAWA, H; MARLOW, M; MILNER, G; MOTTL, M; STOKKING, L; MURTON, B; PHIPPS, S; RIGSBY, C; SABODA, K; STABELL, B; VAN DER LAAN, S; XU, Y; STEWART, S; ALI, J; ARCULUS, R; BOLLOTTI, D; BURKE, M; CIAMPO, G; HAGGERTY, J; HASTON, R	ODP125	30.908	141.763	-1				COUL	SEDIMENTARY	UNKNOWN	UNKNOWN	SILICICLASTIC																			0.1
ODP0125-0784A-032R-002/99-101		SEDDB	10.2973/odp.proc.ir.125.1990	SITE 784	PROC ODP, INIT REPORTS	FRYER, P; PEARCE, J; HELING, D; HOBART, M; ISHII, T; JOHNSON, L; LAGABRIELLE, Y; MCCOY, F; MAEKAWA, H; MARLOW, M; MILNER, G; MOTTL, M; STOKKING, L; MURTON, B; PHIPPS, S; RIGSBY, C; SABODA, K; STABELL, B; VAN DER LAAN, S; XU, Y; STEWART, S; ALI, J; ARCULUS, R; BOLLOTTI, D; BURKE, M; CIAMPO, G; HAGGERTY, J; HASTON, R	ODP125	30.908	141.763	-1				COUL	SEDIMENTARY	UNKNOWN	UNKNOWN	SILICICLASTIC																			0.2
ODP0125-0784A-033R-002/122-123		SEDDB	10.2973/odp.proc.ir.125.1990	SITE 784	PROC ODP, INIT REPORTS	FRYER, P; PEARCE, J; HELING, D; HOBART, M; ISHII, T; JOHNSON, L; LAGABRIELLE, Y; MCCOY, F; MAEKAWA, H; MARLOW, M; MILNER, G; MOTTL, M; STOKKING, L; MURTON, B; PHIPPS, S; RIGSBY, C; SABODA, K; STABELL, B; VAN DER LAAN, S; XU, Y; STEWART, S; ALI, J; ARCULUS, R; BOLLOTTI, D; BURKE, M; CIAMPO, G; HAGGERTY, J; HASTON, R	ODP125	30.908	141.763	-1				COUL	SEDIMENTARY	UNKNOWN	UNKNOWN	SILICICLASTIC																			0.1
ODP0125-0784A-022R-002/96-98		SEDDB	10.2973/odp.proc.ir.125.1990	SITE 784	PROC ODP, INIT REPORTS	FRYER, P; PEARCE, J; HELING, D; HOBART, M; ISHII, T; JOHNSON, L; LAGABRIELLE, Y; MCCOY, F; MAEKAWA, H; MARLOW, M; MILNER, G; MOTTL, M; STOKKING, L; MURTON, B; PHIPPS, S; RIGSBY, C; SABODA, K; STABELL, B; VAN DER LAAN, S; XU, Y; STEWART, S; ALI, J; ARCULUS, R; BOLLOTTI, D; BURKE, M; CIAMPO, G; HAGGERTY, J; HASTON, R	ODP125	30.908	141.763	-1				COUL	SEDIMENTARY	UNKNOWN	UNKNOWN	SILICICLASTIC																			0.5
ODP0125-0784A-003R-002/35-37		SEDDB	10.2973/odp.proc.ir.125.1990	SITE 784	PROC ODP, INIT REPORTS	FRYER, P; PEARCE, J; HELING, D; HOBART, M; ISHII, T; JOHNSON, L; LAGABRIELLE, Y; MCCOY, F; MAEKAWA, H; MARLOW, M; MILNER, G; MOTTL, M; STOKKING, L; MURTON, B; PHIPPS, S; RIGSBY, C; SABODA, K; STABELL, B; VAN DER LAAN, S; XU, Y; STEWART, S; ALI, J; ARCULUS, R; BOLLOTTI, D; BURKE, M; CIAMPO, G; HAGGERTY, J; HASTON, R	ODP125	30.908	141.763	-1	0.0118		1.806	COUL	SEDIMENTARY	UNKNOWN	UNKNOWN	SILICICLASTIC																			9.5
ODP0125-0784A-019R-002/36-38		SEDDB	10.2973/odp.proc.ir.125.1990	SITE 784	PROC ODP, INIT REPORTS	FRYER, P; PEARCE, J; HELING, D; HOBART, M; ISHII, T; JOHNSON, L; LAGABRIELLE, Y; MCCOY, F; MAEKAWA, H; MARLOW, M; MILNER, G; MOTTL, M; STOKKING, L; MURTON, B; PHIPPS, S; RIGSBY, C; SABODA, K; STABELL, B; VAN DER LAAN, S; XU, Y; STEWART, S; ALI, J; ARCULUS, R; BOLLOTTI, D; BURKE, M; CIAMPO, G; HAGGERTY, J; HASTON, R	ODP125	30.908	141.763	-1				COUL	SEDIMENTARY	UNKNOWN	UNKNOWN	SILICICLASTIC																			0.1
ODP0125-0784A-042R-002/41-43		SEDDB	10.2973/odp.proc.ir.125.1990	SITE 784	PROC ODP, INIT REPORTS	FRYER, P; PEARCE, J; HELING, D; HOBART, M; ISHII, T; JOHNSON, L; LAGABRIELLE, Y; MCCOY, F; MAEKAWA, H; MARLOW, M; MILNER, G; MOTTL, M; STOKKING, L; MURTON, B; PHIPPS, S; RIGSBY, C; SABODA, K; STABELL, B; VAN DER LAAN, S; XU, Y; STEWART, S; ALI, J; ARCULUS, R; BOLLOTTI, D; BURKE, M; CIAMPO, G; HAGGERTY, J; HASTON, R	ODP125	30.908	141.763	-1				COUL	SEDIMENTARY	UNKNOWN	UNKNOWN	SILICICLASTIC																			0.5
ODP0125-0784A-010R-002/59-61		SEDDB	10.2973/odp.proc.ir.125.1990	SITE 784	PROC ODP, INIT REPORTS	FRYER, P; PEARCE, J; HELING, D; HOBART, M; ISHII, T; JOHNSON, L; LAGABRIELLE, Y; MCCOY, F; MAEKAWA, H; MARLOW, M; MILNER, G; MOTTL, M; STOKKING, L; MURTON, B; PHIPPS, S; RIGSBY, C; SABODA, K; STABELL, B; VAN DER LAAN, S; XU, Y; STEWART, S; ALI, J; ARCULUS, R; BOLLOTTI, D; BURKE, M; CIAMPO, G; HAGGERTY, J; HASTON, R	ODP125	30.908	141.763	-1	1.806		5.332	COUL	SEDIMENTARY	UNKNOWN	UNKNOWN	SILICICLASTIC																			0.1
ODP0125-0784A-030R-002/93-95		SEDDB	10.2973/odp.proc.ir.125.1990	SITE 784	PROC ODP, INIT REPORTS	FRYER, P; PEARCE, J; HELING, D; HOBART, M; ISHII, T; JOHNSON, L; LAGABRIELLE, Y; MCCOY, F; MAEKAWA, H; MARLOW, M; MILNER, G; MOTTL, M; STOKKING, L; MURTON, B; PHIPPS, S; RIGSBY, C; SABODA, K; STABELL, B; VAN DER LAAN, S; XU, Y; STEWART, S; ALI, J; ARCULUS, R; BOLLOTTI, D; BURKE, M; CIAMPO, G; HAGGERTY, J; HASTON, R	ODP125	30.908	141.763	-1				COUL	SEDIMENTARY	UNKNOWN	UNKNOWN	SILICICLASTIC																			0.6
ODP0125-0784A-027R-002/104-106		SEDDB	10.2973/odp.proc.ir.125.1990	SITE 784	PROC ODP, INIT REPORTS	FRYER, P; PEARCE, J; HELING, D; HOBART, M; ISHII, T; JOHNSON, L; LAGABRIELLE, Y; MCCOY, F; MAEKAWA, H; MARLOW, M; MILNER, G; MOTTL, M; STOKKING, L; MURTON, B; PHIPPS, S; RIGSBY, C; SABODA, K; STABELL, B; VAN DER LAAN, S; XU, Y; STEWART, S; ALI, J; ARCULUS, R; BOLLOTTI, D; BURKE, M; CIAMPO, G; HAGGERTY, J; HASTON, R	ODP125	30.908	141.763	-1				COUL	SEDIMENTARY	UNKNOWN	UNKNOWN	SILICICLASTIC																			0.2
ODP0125-0784A-029R-002/107-109		SEDDB	10.2973/odp.proc.ir.125.1990	SITE 784	PROC ODP, INIT REPORTS	FRYER, P; PEARCE, J; HELING, D; HOBART, M; ISHII, T; JOHNSON, L; LAGABRIELLE, Y; MCCOY, F; MAEKAWA, H; MARLOW, M; MILNER, G; MOTTL, M; STOKKING, L; MURTON, B; PHIPPS, S; RIGSBY, C; SABODA, K; STABELL, B; VAN DER LAAN, S; XU, Y; STEWART, S; ALI, J; ARCULUS, R; BOLLOTTI, D; BURKE, M; CIAMPO, G; HAGGERTY, J; HASTON, R	ODP125	30.908	141.763	-1				COUL	SEDIMENTARY	UNKNOWN	UNKNOWN	SILICICLASTIC																			0.2
ODP0125-0784A-037R-002/26-28		SEDDB	10.2973/odp.proc.ir.125.1990	SITE 784	PROC ODP, INIT REPORTS	FRYER, P; PEARCE, J; HELING, D; HOBART, M; ISHII, T; JOHNSON, L; LAGABRIELLE, Y; MCCOY, F; MAEKAWA, H; MARLOW, M; MILNER, G; MOTTL, M; STOKKING, L; MURTON, B; PHIPPS, S; RIGSBY, C; SABODA, K; STABELL, B; VAN DER LAAN, S; XU, Y; STEWART, S; ALI, J; ARCULUS, R; BOLLOTTI, D; BURKE, M; CIAMPO, G; HAGGERTY, J; HASTON, R	ODP125	30.908	141.763	-1				COUL	SEDIMENTARY	UNKNOWN	UNKNOWN	SILICICLASTIC																			0.4
ODP0125-0784A-017R-002/48-50		SEDDB	10.2973/odp.proc.ir.125.1990	SITE 784	PROC ODP, INIT REPORTS	FRYER, P; PEARCE, J; HELING, D; HOBART, M; ISHII, T; JOHNSON, L; LAGABRIELLE, Y; MCCOY, F; MAEKAWA, H; MARLOW, M; MILNER, G; MOTTL, M; STOKKING, L; MURTON, B; PHIPPS, S; RIGSBY, C; SABODA, K; STABELL, B; VAN DER LAAN, S; XU, Y; STEWART, S; ALI, J; ARCULUS, R; BOLLOTTI, D; BURKE, M; CIAMPO, G; HAGGERTY, J; HASTON, R	ODP125	30.908	141.763	-1				COUL	SEDIMENTARY	UNKNOWN	UNKNOWN	SILICICLASTIC																			0.2
ODP0125-0784A-018R-002/121-123		SEDDB	10.2973/odp.proc.ir.125.1990	SITE 784	PROC ODP, INIT REPORTS	FRYER, P; PEARCE, J; HELING, D; HOBART, M; ISHII, T; JOHNSON, L; LAGABRIELLE, Y; MCCOY, F; MAEKAWA, H; MARLOW, M; MILNER, G; MOTTL, M; STOKKING, L; MURTON, B; PHIPPS, S; RIGSBY, C; SABODA, K; STABELL, B; VAN DER LAAN, S; XU, Y; STEWART, S; ALI, J; ARCULUS, R; BOLLOTTI, D; BURKE, M; CIAMPO, G; HAGGERTY, J; HASTON, R	ODP125	30.908	141.763	-1				COUL	SEDIMENTARY	UNKNOWN	UNKNOWN	SILICICLASTIC																			0.2
ODP0125-0784A-006R-002/80-82		SEDDB	10.2973/odp.proc.ir.125.1990	SITE 784	PROC ODP, INIT REPORTS	FRYER, P; PEARCE, J; HELING, D; HOBART, M; ISHII, T; JOHNSON, L; LAGABRIELLE, Y; MCCOY, F; MAEKAWA, H; MARLOW, M; MILNER, G; MOTTL, M; STOKKING, L; MURTON, B; PHIPPS, S; RIGSBY, C; SABODA, K; STABELL, B; VAN DER LAAN, S; XU, Y; STEWART, S; ALI, J; ARCULUS, R; BOLLOTTI, D; BURKE, M; CIAMPO, G; HAGGERTY, J; HASTON, R	ODP125	30.908	141.763	-1	0.0118		1.806	COUL	SEDIMENTARY	UNKNOWN	UNKNOWN	SILICICLASTIC																			0.3
ODP0129-0801A-019R-0CC/12-16		SEDDB	10.2973/odp.proc.sr.129.111.1992	SEDIMENTOLOGICAL AND GEOCHEMICAL CHARACTERISTICS OF LEG 129 SILICEOUS DEPOSITS	PROC ODP, SCI RESULTS	KARL, S; WANDLESS, G; KARPOFF, A	ODP129	18.6428	156.359	-1	65.5		145.5	MS	SEDIMENTARY	UNKNOWN	UNKNOWN	SILICICLASTIC
ODP0129-0801A-019R-0CC/12-16		SEDDB	10.2973/odp.proc.sr.129.111.1992	SEDIMENTOLOGICAL AND GEOCHEMICAL CHARACTERISTICS OF LEG 129 SILICEOUS DEPOSITS	PROC ODP, SCI RESULTS	KARL, S; WANDLESS, G; KARPOFF, A	ODP129	18.6428	156.359	-1	65.5		145.5	XRF	SEDIMENTARY	UNKNOWN	UNKNOWN	SILICICLASTIC	82.9	0.4	2.6		2.6			1.22	1.23		0.64	0.87	0.09	0.02
ODP0129-0801A-019R-0CC/12-16		SEDDB	10.2973/odp.proc.sr.129.111.1992	SEDIMENTOLOGICAL AND GEOCHEMICAL CHARACTERISTICS OF LEG 129 SILICEOUS DEPOSITS	PROC ODP, SCI RESULTS	KARL, S; WANDLESS, G; KARPOFF, A	ODP129	18.6428	156.359	-1	65.5		145.5	SPEC	SEDIMENTARY	UNKNOWN	UNKNOWN	SILICICLASTIC																		17		23
ODP0129-0801A-019R-0CC/12-16		SEDDB	10.2973/odp.proc.sr.129.111.1992	SEDIMENTOLOGICAL AND GEOCHEMICAL CHARACTERISTICS OF LEG 129 SILICEOUS DEPOSITS	PROC ODP, SCI RESULTS	KARL, S; WANDLESS, G; KARPOFF, A	ODP129	18.6428	156.359	-1	65.5		145.5	INAA	SEDIMENTARY	UNKNOWN	UNKNOWN	SILICICLASTIC																		12		20.5		11	2.64	0.65		0.358					0.81
ODP0129-0801A-019R-0CC/12-16		SEDDB	10.2973/odp.proc.sr.129.111.1992	SEDIMENTOLOGICAL AND GEOCHEMICAL CHARACTERISTICS OF LEG 129 SILICEOUS DEPOSITS	PROC ODP, SCI RESULTS	KARL, S; WANDLESS, G; KARPOFF, A	ODP129	18.6428	156.359	-1	65.5		145.5	IGN	SEDIMENTARY	UNKNOWN	UNKNOWN	SILICICLASTIC															6.21
ODP0129-0801A-018R-002/14-17		SEDDB	10.2973/odp.proc.sr.129.111.1992	SEDIMENTOLOGICAL AND GEOCHEMICAL CHARACTERISTICS OF LEG 129 SILICEOUS DEPOSITS	PROC ODP, SCI RESULTS	KARL, S; WANDLESS, G; KARPOFF, A	ODP129	18.6428	156.359	-1	65.5		145.5	MS	SEDIMENTARY	UNKNOWN	UNKNOWN	SILICICLASTIC
ODP0129-0801A-018R-002/14-17		SEDDB	10.2973/odp.proc.sr.129.111.1992	SEDIMENTOLOGICAL AND GEOCHEMICAL CHARACTERISTICS OF LEG 129 SILICEOUS DEPOSITS	PROC ODP, SCI RESULTS	KARL, S; WANDLESS, G; KARPOFF, A	ODP129	18.6428	156.359	-1	65.5		145.5	XRF	SEDIMENTARY	UNKNOWN	UNKNOWN	SILICICLASTIC	76.9	0.53	4.6		4			2.18	0.54		0.95	1.81	0.11	0.04
ODP0129-0801A-018R-002/14-17		SEDDB	10.2973/odp.proc.sr.129.111.1992	SEDIMENTOLOGICAL AND GEOCHEMICAL CHARACTERISTICS OF LEG 129 SILICEOUS DEPOSITS	PROC ODP, SCI RESULTS	KARL, S; WANDLESS, G; KARPOFF, A	ODP129	18.6428	156.359	-1	65.5		145.5	SPEC	SEDIMENTARY	UNKNOWN	UNKNOWN	SILICICLASTIC																		13		23
ODP0129-0801A-018R-002/14-17		SEDDB	10.2973/odp.proc.sr.129.111.1992	SEDIMENTOLOGICAL AND GEOCHEMICAL CHARACTERISTICS OF LEG 129 SILICEOUS DEPOSITS	PROC ODP, SCI RESULTS	KARL, S; WANDLESS, G; KARPOFF, A	ODP129	18.6428	156.359	-1	65.5		145.5	INAA	SEDIMENTARY	UNKNOWN	UNKNOWN	SILICICLASTIC																		14.1		24		12	2.72	0.649		0.37					0.98
ODP0129-0801A-018R-002/14-17		SEDDB	10.2973/odp.proc.sr.129.111.1992	SEDIMENTOLOGICAL AND GEOCHEMICAL CHARACTERISTICS OF LEG 129 SILICEOUS DEPOSITS	PROC ODP, SCI RESULTS	KARL, S; WANDLESS, G; KARPOFF, A	ODP129	18.6428	156.359	-1	65.5		145.5	IGN	SEDIMENTARY	UNKNOWN	UNKNOWN	SILICICLASTIC															7.21
ODP0129-0801B-008R-002/60-63		SEDDB	10.2973/odp.proc.sr.129.111.1992	SEDIMENTOLOGICAL AND GEOCHEMICAL CHARACTERISTICS OF LEG 129 SILICEOUS DEPOSITS	PROC ODP, SCI RESULTS	KARL, S; WANDLESS, G; KARPOFF, A	ODP129	18.642	156.36	-1	65.5		145.5	MS	SEDIMENTARY	UNKNOWN	UNKNOWN	SILICICLASTIC
ODP0129-0801B-008R-002/60-63		SEDDB	10.2973/odp.proc.sr.129.111.1992	SEDIMENTOLOGICAL AND GEOCHEMICAL CHARACTERISTICS OF LEG 129 SILICEOUS DEPOSITS	PROC ODP, SCI RESULTS	KARL, S; WANDLESS, G; KARPOFF, A	ODP129	18.642	156.36	-1	65.5		145.5	XRF	SEDIMENTARY	UNKNOWN	UNKNOWN	SILICICLASTIC	89.5	0.2	1.8		1.4			0.61	0.27		0.48	0.49	0.08	0.02
ODP0129-0801B-008R-002/60-63		SEDDB	10.2973/odp.proc.sr.129.111.1992	SEDIMENTOLOGICAL AND GEOCHEMICAL CHARACTERISTICS OF LEG 129 SILICEOUS DEPOSITS	PROC ODP, SCI RESULTS	KARL, S; WANDLESS, G; KARPOFF, A	ODP129	18.642	156.36	-1	65.5		145.5	SPEC	SEDIMENTARY	UNKNOWN	UNKNOWN	SILICICLASTIC																		16		16
ODP0129-0801B-008R-002/60-63		SEDDB	10.2973/odp.proc.sr.129.111.1992	SEDIMENTOLOGICAL AND GEOCHEMICAL CHARACTERISTICS OF LEG 129 SILICEOUS DEPOSITS	PROC ODP, SCI RESULTS	KARL, S; WANDLESS, G; KARPOFF, A	ODP129	18.642	156.36	-1	65.5		145.5	INAA	SEDIMENTARY	UNKNOWN	UNKNOWN	SILICICLASTIC																		12		16.5		8.1	1.94	0.453		0.301					0.79
ODP0129-0801B-008R-002/60-63		SEDDB	10.2973/odp.proc.sr.129.111.1992	SEDIMENTOLOGICAL AND GEOCHEMICAL CHARACTERISTICS OF LEG 129 SILICEOUS DEPOSITS	PROC ODP, SCI RESULTS	KARL, S; WANDLESS, G; KARPOFF, A	ODP129	18.642	156.36	-1	65.5		145.5	IGN	SEDIMENTARY	UNKNOWN	UNKNOWN	SILICICLASTIC															3.99
ODP0129-0802A-038R-0CC/12-15		SEDDB	10.2973/odp.proc.sr.129.111.1992	SEDIMENTOLOGICAL AND GEOCHEMICAL CHARACTERISTICS OF LEG 129 SILICEOUS DEPOSITS	PROC ODP, SCI RESULTS	KARL, S; WANDLESS, G; KARPOFF, A	ODP129	12.0963	153.21	-1	65.5		145.5	MS	SEDIMENTARY	UNKNOWN	UNKNOWN	SILICICLASTIC
ODP0129-0802A-038R-0CC/12-15		SEDDB	10.2973/odp.proc.sr.129.111.1992	SEDIMENTOLOGICAL AND GEOCHEMICAL CHARACTERISTICS OF LEG 129 SILICEOUS DEPOSITS	PROC ODP, SCI RESULTS	KARL, S; WANDLESS, G; KARPOFF, A	ODP129	12.0963	153.21	-1	65.5		145.5	XRF	SEDIMENTARY	UNKNOWN	UNKNOWN	SILICICLASTIC	65.4	1.16	6.45		5.18			1.72	3.77		1.45	1.1	0.29	0.09
ODP0129-0802A-038R-0CC/12-15		SEDDB	10.2973/odp.proc.sr.129.111.1992	SEDIMENTOLOGICAL AND GEOCHEMICAL CHARACTERISTICS OF LEG 129 SILICEOUS DEPOSITS	PROC ODP, SCI RESULTS	KARL, S; WANDLESS, G; KARPOFF, A	ODP129	12.0963	153.21	-1	65.5		145.5	SPEC	SEDIMENTARY	UNKNOWN	UNKNOWN	SILICICLASTIC																		28		32
ODP0129-0802A-038R-0CC/12-15		SEDDB	10.2973/odp.proc.sr.129.111.1992	SEDIMENTOLOGICAL AND GEOCHEMICAL CHARACTERISTICS OF LEG 129 SILICEOUS DEPOSITS	PROC ODP, SCI RESULTS	KARL, S; WANDLESS, G; KARPOFF, A	ODP129	12.0963	153.21	-1	65.5		145.5	INAA	SEDIMENTARY	UNKNOWN	UNKNOWN	SILICICLASTIC																		29.1		34.8		28	6.8	1.67		0.977					2.59
ODP0129-0802A-038R-0CC/12-15		SEDDB	10.2973/odp.proc.sr.129.111.1992	SEDIMENTOLOGICAL AND GEOCHEMICAL CHARACTERISTICS OF LEG 129 SILICEOUS DEPOSITS	PROC ODP, SCI RESULTS	KARL, S; WANDLESS, G; KARPOFF, A	ODP129	12.0963	153.21	-1	65.5		145.5	IGN	SEDIMENTARY	UNKNOWN	UNKNOWN	SILICICLASTIC															13
ODP0129-0802A-056R-002/88-92		SEDDB	10.2973/odp.proc.sr.129.111.1992	SEDIMENTOLOGICAL AND GEOCHEMICAL CHARACTERISTICS OF LEG 129 SILICEOUS DEPOSITS	PROC ODP, SCI RESULTS	KARL, S; WANDLESS, G; KARPOFF, A	ODP129	12.0963	153.21	-1	65.5		145.5	MS	SEDIMENTARY	UNKNOWN	UNKNOWN	SILICICLASTIC
ODP0129-0802A-056R-002/88-92		SEDDB	10.2973/odp.proc.sr.129.111.1992	SEDIMENTOLOGICAL AND GEOCHEMICAL CHARACTERISTICS OF LEG 129 SILICEOUS DEPOSITS	PROC ODP, SCI RESULTS	KARL, S; WANDLESS, G; KARPOFF, A	ODP129	12.0963	153.21	-1	65.5		145.5	XRF	SEDIMENTARY	UNKNOWN	UNKNOWN	SILICICLASTIC	78.7	0.24	3.71		5.46			1.45	0.78		0.69	1.42	0.24	0.05
ODP0129-0802A-056R-002/88-92		SEDDB	10.2973/odp.proc.sr.129.111.1992	SEDIMENTOLOGICAL AND GEOCHEMICAL CHARACTERISTICS OF LEG 129 SILICEOUS DEPOSITS	PROC ODP, SCI RESULTS	KARL, S; WANDLESS, G; KARPOFF, A	ODP129	12.0963	153.21	-1	65.5		145.5	SPEC	SEDIMENTARY	UNKNOWN	UNKNOWN	SILICICLASTIC																		26		34
ODP0129-0802A-056R-002/88-92		SEDDB	10.2973/odp.proc.sr.129.111.1992	SEDIMENTOLOGICAL AND GEOCHEMICAL CHARACTERISTICS OF LEG 129 SILICEOUS DEPOSITS	PROC ODP, SCI RESULTS	KARL, S; WANDLESS, G; KARPOFF, A	ODP129	12.0963	153.21	-1	65.5		145.5	INAA	SEDIMENTARY	UNKNOWN	UNKNOWN	SILICICLASTIC																		20.7		28.8		22	5.9	1.55		0.98					3.12
ODP0129-0802A-056R-002/88-92		SEDDB	10.2973/odp.proc.sr.129.111.1992	SEDIMENTOLOGICAL AND GEOCHEMICAL CHARACTERISTICS OF LEG 129 SILICEOUS DEPOSITS	PROC ODP, SCI RESULTS	KARL, S; WANDLESS, G; KARPOFF, A	ODP129	12.0963	153.21	-1	65.5		145.5	IGN	SEDIMENTARY	UNKNOWN	UNKNOWN	SILICICLASTIC															6.48
ODP0129-0801B-035R-001/123-127		SEDDB	10.2973/odp.proc.sr.129.111.1992	SEDIMENTOLOGICAL AND GEOCHEMICAL CHARACTERISTICS OF LEG 129 SILICEOUS DEPOSITS	PROC ODP, SCI RESULTS	KARL, S; WANDLESS, G; KARPOFF, A	ODP129	18.642	156.36	-1	145.5		199.6	MS	SEDIMENTARY	UNKNOWN	UNKNOWN	SILICICLASTIC
ODP0129-0801B-035R-001/123-127		SEDDB	10.2973/odp.proc.sr.129.111.1992	SEDIMENTOLOGICAL AND GEOCHEMICAL CHARACTERISTICS OF LEG 129 SILICEOUS DEPOSITS	PROC ODP, SCI RESULTS	KARL, S; WANDLESS, G; KARPOFF, A	ODP129	18.642	156.36	-1	145.5		199.6	XRF	SEDIMENTARY	UNKNOWN	UNKNOWN	SILICICLASTIC	74.5	0.36	5.2		8.3			1.38	0.26		0.78	1.64	0.12	0.07
ODP0129-0801B-035R-001/123-127		SEDDB	10.2973/odp.proc.sr.129.111.1992	SEDIMENTOLOGICAL AND GEOCHEMICAL CHARACTERISTICS OF LEG 129 SILICEOUS DEPOSITS	PROC ODP, SCI RESULTS	KARL, S; WANDLESS, G; KARPOFF, A	ODP129	18.642	156.36	-1	145.5		199.6	SPEC	SEDIMENTARY	UNKNOWN	UNKNOWN	SILICICLASTIC																		13		20
ODP0129-0801B-035R-001/123-127		SEDDB	10.2973/odp.proc.sr.129.111.1992	SEDIMENTOLOGICAL AND GEOCHEMICAL CHARACTERISTICS OF LEG 129 SILICEOUS DEPOSITS	PROC ODP, SCI RESULTS	KARL, S; WANDLESS, G; KARPOFF, A	ODP129	18.642	156.36	-1	145.5		199.6	INAA	SEDIMENTARY	UNKNOWN	UNKNOWN	SILICICLASTIC																		11.6		14.5		10	2.3	0.516		0.36					1.2
ODP0129-0801B-035R-001/123-127		SEDDB	10.2973/odp.proc.sr.129.111.1992	SEDIMENTOLOGICAL AND GEOCHEMICAL CHARACTERISTICS OF LEG 129 SILICEOUS DEPOSITS	PROC ODP, SCI RESULTS	KARL, S; WANDLESS, G; KARPOFF, A	ODP129	18.642	156.36	-1	145.5		199.6	IGN	SEDIMENTARY	UNKNOWN	UNKNOWN	SILICICLASTIC															6.86
ODP0129-0801B-035R-001/51-55		SEDDB	10.2973/odp.proc.sr.129.111.1992	SEDIMENTOLOGICAL AND GEOCHEMICAL CHARACTERISTICS OF LEG 129 SILICEOUS DEPOSITS	PROC ODP, SCI RESULTS	KARL, S; WANDLESS, G; KARPOFF, A	ODP129	18.642	156.36	-1	145.5		199.6	MS	SEDIMENTARY	UNKNOWN	UNKNOWN	SILICICLASTIC
ODP0129-0801B-035R-001/51-55		SEDDB	10.2973/odp.proc.sr.129.111.1992	SEDIMENTOLOGICAL AND GEOCHEMICAL CHARACTERISTICS OF LEG 129 SILICEOUS DEPOSITS	PROC ODP, SCI RESULTS	KARL, S; WANDLESS, G; KARPOFF, A	ODP129	18.642	156.36	-1	145.5		199.6	XRF	SEDIMENTARY	UNKNOWN	UNKNOWN	SILICICLASTIC	64.6	0.6	8.4		9.9			2.06	0.36		1.07	2.77	0.09	0.11
ODP0129-0801B-035R-001/51-55		SEDDB	10.2973/odp.proc.sr.129.111.1992	SEDIMENTOLOGICAL AND GEOCHEMICAL CHARACTERISTICS OF LEG 129 SILICEOUS DEPOSITS	PROC ODP, SCI RESULTS	KARL, S; WANDLESS, G; KARPOFF, A	ODP129	18.642	156.36	-1	145.5		199.6	SPEC	SEDIMENTARY	UNKNOWN	UNKNOWN	SILICICLASTIC																		10		24
ODP0129-0801B-035R-001/51-55		SEDDB	10.2973/odp.proc.sr.129.111.1992	SEDIMENTOLOGICAL AND GEOCHEMICAL CHARACTERISTICS OF LEG 129 SILICEOUS DEPOSITS	PROC ODP, SCI RESULTS	KARL, S; WANDLESS, G; KARPOFF, A	ODP129	18.642	156.36	-1	145.5		199.6	INAA	SEDIMENTARY	UNKNOWN	UNKNOWN	SILICICLASTIC																		25.6		29.9		22	3.83	0.773		0.46					1.3
ODP0129-0801B-035R-001/51-55		SEDDB	10.2973/odp.proc.sr.129.111.1992	SEDIMENTOLOGICAL AND GEOCHEMICAL CHARACTERISTICS OF LEG 129 SILICEOUS DEPOSITS	PROC ODP, SCI RESULTS	KARL, S; WANDLESS, G; KARPOFF, A	ODP129	18.642	156.36	-1	145.5		199.6	IGN	SEDIMENTARY	UNKNOWN	UNKNOWN	SILICICLASTIC															9.12
ODP0129-0801B-037R-001/7-10		SEDDB	10.2973/odp.proc.sr.129.111.1992	SEDIMENTOLOGICAL AND GEOCHEMICAL CHARACTERISTICS OF LEG 129 SILICEOUS DEPOSITS	PROC ODP, SCI RESULTS	KARL, S; WANDLESS, G; KARPOFF, A	ODP129	18.642	156.36	-1	145.5		199.6	MS	SEDIMENTARY	UNKNOWN	UNKNOWN	SILICICLASTIC
ODP0129-0801B-037R-001/7-10		SEDDB	10.2973/odp.proc.sr.129.111.1992	SEDIMENTOLOGICAL AND GEOCHEMICAL CHARACTERISTICS OF LEG 129 SILICEOUS DEPOSITS	PROC ODP, SCI RESULTS	KARL, S; WANDLESS, G; KARPOFF, A	ODP129	18.642	156.36	-1	145.5		199.6	XRF	SEDIMENTARY	UNKNOWN	UNKNOWN	SILICICLASTIC	91.8	0.03	0.6		3.3			0.27	0.05		0.15	0.29	0.05	0.05
ODP0129-0801B-037R-001/7-10		SEDDB	10.2973/odp.proc.sr.129.111.1992	SEDIMENTOLOGICAL AND GEOCHEMICAL CHARACTERISTICS OF LEG 129 SILICEOUS DEPOSITS	PROC ODP, SCI RESULTS	KARL, S; WANDLESS, G; KARPOFF, A	ODP129	18.642	156.36	-1	145.5		199.6	SPEC	SEDIMENTARY	UNKNOWN	UNKNOWN	SILICICLASTIC																		10		10
ODP0129-0801B-037R-001/7-10		SEDDB	10.2973/odp.proc.sr.129.111.1992	SEDIMENTOLOGICAL AND GEOCHEMICAL CHARACTERISTICS OF LEG 129 SILICEOUS DEPOSITS	PROC ODP, SCI RESULTS	KARL, S; WANDLESS, G; KARPOFF, A	ODP129	18.642	156.36	-1	145.5		199.6	INAA	SEDIMENTARY	UNKNOWN	UNKNOWN	SILICICLASTIC																		1.8		2.3		1.4	0.44	0.11		0.065					0.23
ODP0129-0801B-037R-001/7-10		SEDDB	10.2973/odp.proc.sr.129.111.1992	SEDIMENTOLOGICAL AND GEOCHEMICAL CHARACTERISTICS OF LEG 129 SILICEOUS DEPOSITS	PROC ODP, SCI RESULTS	KARL, S; WANDLESS, G; KARPOFF, A	ODP129	18.642	156.36	-1	145.5		199.6	IGN	SEDIMENTARY	UNKNOWN	UNKNOWN	SILICICLASTIC															1.95
ODP0185-1149A-004H-002/140-150		SEDDB	10.1029/2002GC000421	Sr-Nd-Pb COMPOSITION OF MESOZOIC PACIFIC OCEANIC CRUST (SITE 1149 AND 801, ODP LEG 185): IMPLICATIONS FOR ALTERATION OF OCEAN CRUST AND INPUT INTO THE IZU-BONIN-MARIANA SUBDUCTION SYSTEM	GEOCHEM GEOPHYS GEOSYST	HAUFF, F; HOERNLE, K; SCHMIDT, A	ODP185	31.342	143.351	-1	0		65.5	ICPES	SEDIMENTARY	UNKNOWN	UNKNOWN	SILICICLASTIC	57.72	0.637	14.28	7.08				2.71	1.46		2.74	2.53	0.099	0.121
ODP0185-1149A-004H-002/140-150		SEDDB	10.1029/2002GC000421	Sr-Nd-Pb COMPOSITION OF MESOZOIC PACIFIC OCEANIC CRUST (SITE 1149 AND 801, ODP LEG 185): IMPLICATIONS FOR ALTERATION OF OCEAN CRUST AND INPUT INTO THE IZU-BONIN-MARIANA SUBDUCTION SYSTEM	GEOCHEM GEOPHYS GEOSYST	HAUFF, F; HOERNLE, K; SCHMIDT, A	ODP185	31.342	143.351	-1	0		65.5	IGN	SEDIMENTARY	UNKNOWN	UNKNOWN	SILICICLASTIC															11.05
ODP0185-1149A-004H-002/140-150		SEDDB	10.1029/2002GC000421	Sr-Nd-Pb COMPOSITION OF MESOZOIC PACIFIC OCEANIC CRUST (SITE 1149 AND 801, ODP LEG 185): IMPLICATIONS FOR ALTERATION OF OCEAN CRUST AND INPUT INTO THE IZU-BONIN-MARIANA SUBDUCTION SYSTEM	GEOCHEM GEOPHYS GEOSYST	HAUFF, F; HOERNLE, K; SCHMIDT, A	ODP185	31.342	143.351	-1	0		65.5	MS	SEDIMENTARY	UNKNOWN	UNKNOWN	SILICICLASTIC
ODP0185-1149A-004H-002/140-150		SEDDB	10.1029/2002GC000421	Sr-Nd-Pb COMPOSITION OF MESOZOIC PACIFIC OCEANIC CRUST (SITE 1149 AND 801, ODP LEG 185): IMPLICATIONS FOR ALTERATION OF OCEAN CRUST AND INPUT INTO THE IZU-BONIN-MARIANA SUBDUCTION SYSTEM	GEOCHEM GEOPHYS GEOSYST	HAUFF, F; HOERNLE, K; SCHMIDT, A	ODP185	31.342	143.351	-1	0		65.5	TIMS	SEDIMENTARY	UNKNOWN	UNKNOWN	SILICICLASTIC
ODP0185-1149A-004H-002/140-150		SEDDB	10.1029/2008GC002101	Hf -Nd INPUT FLUX IN THE IZU-MARIANA SUBDUCTION ZONE AND RECYCLING OF SUBDUCTED MATERIAL IN THE MANTLE	GEOCHEM GEOPHYS GEOSYST	CHAUVEL, C; MARINI, J-C; PLANK, T; LUDDEN, J	ODP185	31.342	143.351	-1	0		65.5	ICPES	SEDIMENTARY	UNKNOWN	UNKNOWN	SILICICLASTIC	57.72	0.637	14.28	7.08				2.71	1.46		2.74	2.53	0.099	0.121
ODP0185-1149A-004H-002/140-150		SEDDB	10.1029/2008GC002101	Hf -Nd INPUT FLUX IN THE IZU-MARIANA SUBDUCTION ZONE AND RECYCLING OF SUBDUCTED MATERIAL IN THE MANTLE	GEOCHEM GEOPHYS GEOSYST	CHAUVEL, C; MARINI, J-C; PLANK, T; LUDDEN, J	ODP185	31.342	143.351	-1	0		65.5	IGN	SEDIMENTARY	UNKNOWN	UNKNOWN	SILICICLASTIC															11.05
ODP0185-1149A-004H-002/140-150		SEDDB	10.1029/2008GC002101	Hf -Nd INPUT FLUX IN THE IZU-MARIANA SUBDUCTION ZONE AND RECYCLING OF SUBDUCTED MATERIAL IN THE MANTLE	GEOCHEM GEOPHYS GEOSYST	CHAUVEL, C; MARINI, J-C; PLANK, T; LUDDEN, J	ODP185	31.342	143.351	-1	0		65.5	MS	SEDIMENTARY	UNKNOWN	UNKNOWN	SILICICLASTIC
ODP0185-1149A-004H-002/140-150		SEDDB	10.1029/2008GC002101	Hf -Nd INPUT FLUX IN THE IZU-MARIANA SUBDUCTION ZONE AND RECYCLING OF SUBDUCTED MATERIAL IN THE MANTLE	GEOCHEM GEOPHYS GEOSYST	CHAUVEL, C; MARINI, J-C; PLANK, T; LUDDEN, J	ODP185	31.342	143.351	-1	0		65.5	TIMS	SEDIMENTARY	UNKNOWN	UNKNOWN	SILICICLASTIC
ODP0185-1149A-004H-002/140-150		SEDDB	10.1029/2006GC001444	CHEMICAL COMPOSITION OF SEDIMENTS SUBDUCTING AT THE IZU-BONIN TRENCH	GEOCHEM GEOPHYS GEOSYST	PLANK, T; KELLEY, K; MURRAY, R; STERN, L	ODP185	31.342	143.351	-1	0		65.5	ICPES	SEDIMENTARY	UNKNOWN	UNKNOWN	SILICICLASTIC	57.72	0.637	14.28	7.08				2.71	1.46		2.74	2.53	0.099	0.121
ODP0185-1149A-004H-002/140-150		SEDDB	10.1029/2006GC001444	CHEMICAL COMPOSITION OF SEDIMENTS SUBDUCTING AT THE IZU-BONIN TRENCH	GEOCHEM GEOPHYS GEOSYST	PLANK, T; KELLEY, K; MURRAY, R; STERN, L	ODP185	31.342	143.351	-1	0		65.5	IGN	SEDIMENTARY	UNKNOWN	UNKNOWN	SILICICLASTIC															11.05
ODP0185-1149A-004H-002/140-150		SEDDB	10.1029/2006GC001444	CHEMICAL COMPOSITION OF SEDIMENTS SUBDUCTING AT THE IZU-BONIN TRENCH	GEOCHEM GEOPHYS GEOSYST	PLANK, T; KELLEY, K; MURRAY, R; STERN, L	ODP185	31.342	143.351	-1	0		65.5	MS	SEDIMENTARY	UNKNOWN	UNKNOWN	SILICICLASTIC
ODP0185-1149A-004H-002/140-150		SEDDB	10.1029/2006GC001444	CHEMICAL COMPOSITION OF SEDIMENTS SUBDUCTING AT THE IZU-BONIN TRENCH	GEOCHEM GEOPHYS GEOSYST	PLANK, T; KELLEY, K; MURRAY, R; STERN, L	ODP185	31.342	143.351	-1	0		65.5	TIMS	SEDIMENTARY	UNKNOWN	UNKNOWN	SILICICLASTIC
ODP0185-1149B-012R-0CC/0-5		SEDDB	10.1029/2006GC001444	CHEMICAL COMPOSITION OF SEDIMENTS SUBDUCTING AT THE IZU-BONIN TRENCH	GEOCHEM GEOPHYS GEOSYST	PLANK, T; KELLEY, K; MURRAY, R; STERN, L	ODP185	31.3422	143.351	-1		90		ICPES	SEDIMENTARY	UNKNOWN	UNKNOWN	SILICICLASTIC	62.43	0.438	6.78	9.79				2.51	0.65		1.84	1.83	0.333	1.631
ODP0185-1149B-012R-0CC/0-5		SEDDB	10.1029/2006GC001444	CHEMICAL COMPOSITION OF SEDIMENTS SUBDUCTING AT THE IZU-BONIN TRENCH	GEOCHEM GEOPHYS GEOSYST	PLANK, T; KELLEY, K; MURRAY, R; STERN, L	ODP185	31.3422	143.351	-1		90		IGN	SEDIMENTARY	UNKNOWN	UNKNOWN	SILICICLASTIC															12.34
ODP0185-1149B-012R-0CC/0-5		SEDDB	10.1029/2006GC001444	CHEMICAL COMPOSITION OF SEDIMENTS SUBDUCTING AT THE IZU-BONIN TRENCH	GEOCHEM GEOPHYS GEOSYST	PLANK, T; KELLEY, K; MURRAY, R; STERN, L	ODP185	31.3422	143.351	-1		90		MS	SEDIMENTARY	UNKNOWN	UNKNOWN	SILICICLASTIC
ODP0185-1149B-012R-0CC/0-5		SEDDB	10.1029/2006GC001444	CHEMICAL COMPOSITION OF SEDIMENTS SUBDUCTING AT THE IZU-BONIN TRENCH	GEOCHEM GEOPHYS GEOSYST	PLANK, T; KELLEY, K; MURRAY, R; STERN, L	ODP185	31.3422	143.351	-1		90		TIMS	SEDIMENTARY	UNKNOWN	UNKNOWN	SILICICLASTIC
ODP0185-1149B-012R-0CC/0-5		SEDDB	10.1029/2008GC002101	Hf -Nd INPUT FLUX IN THE IZU-MARIANA SUBDUCTION ZONE AND RECYCLING OF SUBDUCTED MATERIAL IN THE MANTLE	GEOCHEM GEOPHYS GEOSYST	CHAUVEL, C; MARINI, J-C; PLANK, T; LUDDEN, J	ODP185	31.3422	143.351	-1		90		ICPES	SEDIMENTARY	UNKNOWN	UNKNOWN	SILICICLASTIC	62.43	0.438	6.78	9.79				2.51	0.65		1.84	1.83	0.333	1.631
ODP0185-1149B-012R-0CC/0-5		SEDDB	10.1029/2008GC002101	Hf -Nd INPUT FLUX IN THE IZU-MARIANA SUBDUCTION ZONE AND RECYCLING OF SUBDUCTED MATERIAL IN THE MANTLE	GEOCHEM GEOPHYS GEOSYST	CHAUVEL, C; MARINI, J-C; PLANK, T; LUDDEN, J	ODP185	31.3422	143.351	-1		90		IGN	SEDIMENTARY	UNKNOWN	UNKNOWN	SILICICLASTIC															12.34
ODP0185-1149B-012R-0CC/0-5		SEDDB	10.1029/2008GC002101	Hf -Nd INPUT FLUX IN THE IZU-MARIANA SUBDUCTION ZONE AND RECYCLING OF SUBDUCTED MATERIAL IN THE MANTLE	GEOCHEM GEOPHYS GEOSYST	CHAUVEL, C; MARINI, J-C; PLANK, T; LUDDEN, J	ODP185	31.3422	143.351	-1		90		MS	SEDIMENTARY	UNKNOWN	UNKNOWN	SILICICLASTIC
ODP0185-1149B-012R-0CC/0-5		SEDDB	10.1029/2008GC002101	Hf -Nd INPUT FLUX IN THE IZU-MARIANA SUBDUCTION ZONE AND RECYCLING OF SUBDUCTED MATERIAL IN THE MANTLE	GEOCHEM GEOPHYS GEOSYST	CHAUVEL, C; MARINI, J-C; PLANK, T; LUDDEN, J	ODP185	31.3422	143.351	-1		90		TIMS	SEDIMENTARY	UNKNOWN	UNKNOWN	SILICICLASTIC
ODP0185-1149B-012R-0CC/0-5		SEDDB	10.1029/2002GC000421	Sr-Nd-Pb COMPOSITION OF MESOZOIC PACIFIC OCEANIC CRUST (SITE 1149 AND 801, ODP LEG 185): IMPLICATIONS FOR ALTERATION OF OCEAN CRUST AND INPUT INTO THE IZU-BONIN-MARIANA SUBDUCTION SYSTEM	GEOCHEM GEOPHYS GEOSYST	HAUFF, F; HOERNLE, K; SCHMIDT, A	ODP185	31.3422	143.351	-1		90		ICPES	SEDIMENTARY	UNKNOWN	UNKNOWN	SILICICLASTIC	62.43	0.438	6.78	9.79				2.51	0.65		1.84	1.83	0.333	1.631
ODP0185-1149B-012R-0CC/0-5		SEDDB	10.1029/2002GC000421	Sr-Nd-Pb COMPOSITION OF MESOZOIC PACIFIC OCEANIC CRUST (SITE 1149 AND 801, ODP LEG 185): IMPLICATIONS FOR ALTERATION OF OCEAN CRUST AND INPUT INTO THE IZU-BONIN-MARIANA SUBDUCTION SYSTEM	GEOCHEM GEOPHYS GEOSYST	HAUFF, F; HOERNLE, K; SCHMIDT, A	ODP185	31.3422	143.351	-1		90		IGN	SEDIMENTARY	UNKNOWN	UNKNOWN	SILICICLASTIC															12.34
ODP0185-1149B-012R-0CC/0-5		SEDDB	10.1029/2002GC000421	Sr-Nd-Pb COMPOSITION OF MESOZOIC PACIFIC OCEANIC CRUST (SITE 1149 AND 801, ODP LEG 185): IMPLICATIONS FOR ALTERATION OF OCEAN CRUST AND INPUT INTO THE IZU-BONIN-MARIANA SUBDUCTION SYSTEM	GEOCHEM GEOPHYS GEOSYST	HAUFF, F; HOERNLE, K; SCHMIDT, A	ODP185	31.3422	143.351	-1		90		MS	SEDIMENTARY	UNKNOWN	UNKNOWN	SILICICLASTIC
ODP0185-1149B-012R-0CC/0-5		SEDDB	10.1029/2002GC000421	Sr-Nd-Pb COMPOSITION OF MESOZOIC PACIFIC OCEANIC CRUST (SITE 1149 AND 801, ODP LEG 185): IMPLICATIONS FOR ALTERATION OF OCEAN CRUST AND INPUT INTO THE IZU-BONIN-MARIANA SUBDUCTION SYSTEM	GEOCHEM GEOPHYS GEOSYST	HAUFF, F; HOERNLE, K; SCHMIDT, A	ODP185	31.3422	143.351	-1		90		TIMS	SEDIMENTARY	UNKNOWN	UNKNOWN	SILICICLASTIC
ODP0185-1149A-010H-003/140-150		SEDDB	10.1029/2002GC000421	Sr-Nd-Pb COMPOSITION OF MESOZOIC PACIFIC OCEANIC CRUST (SITE 1149 AND 801, ODP LEG 185): IMPLICATIONS FOR ALTERATION OF OCEAN CRUST AND INPUT INTO THE IZU-BONIN-MARIANA SUBDUCTION SYSTEM	GEOCHEM GEOPHYS GEOSYST	HAUFF, F; HOERNLE, K; SCHMIDT, A	ODP185	31.342	143.351	-1	0		65.5	ICPES	SEDIMENTARY	UNKNOWN	UNKNOWN	SILICICLASTIC	54.77	0.611	15.03	6.46				2.12	2.77		3.51	2.02	0.089	0.584
ODP0185-1149A-010H-003/140-150		SEDDB	10.1029/2002GC000421	Sr-Nd-Pb COMPOSITION OF MESOZOIC PACIFIC OCEANIC CRUST (SITE 1149 AND 801, ODP LEG 185): IMPLICATIONS FOR ALTERATION OF OCEAN CRUST AND INPUT INTO THE IZU-BONIN-MARIANA SUBDUCTION SYSTEM	GEOCHEM GEOPHYS GEOSYST	HAUFF, F; HOERNLE, K; SCHMIDT, A	ODP185	31.342	143.351	-1	0		65.5	IGN	SEDIMENTARY	UNKNOWN	UNKNOWN	SILICICLASTIC															10.91
ODP0185-1149A-010H-003/140-150		SEDDB	10.1029/2002GC000421	Sr-Nd-Pb COMPOSITION OF MESOZOIC PACIFIC OCEANIC CRUST (SITE 1149 AND 801, ODP LEG 185): IMPLICATIONS FOR ALTERATION OF OCEAN CRUST AND INPUT INTO THE IZU-BONIN-MARIANA SUBDUCTION SYSTEM	GEOCHEM GEOPHYS GEOSYST	HAUFF, F; HOERNLE, K; SCHMIDT, A	ODP185	31.342	143.351	-1	0		65.5	MS	SEDIMENTARY	UNKNOWN	UNKNOWN	SILICICLASTIC
ODP0185-1149A-010H-003/140-150		SEDDB	10.1029/2002GC000421	Sr-Nd-Pb COMPOSITION OF MESOZOIC PACIFIC OCEANIC CRUST (SITE 1149 AND 801, ODP LEG 185): IMPLICATIONS FOR ALTERATION OF OCEAN CRUST AND INPUT INTO THE IZU-BONIN-MARIANA SUBDUCTION SYSTEM	GEOCHEM GEOPHYS GEOSYST	HAUFF, F; HOERNLE, K; SCHMIDT, A	ODP185	31.342	143.351	-1	0		65.5	TIMS	SEDIMENTARY	UNKNOWN	UNKNOWN	SILICICLASTIC
ODP0185-1149A-010H-003/140-150		SEDDB	10.1029/2006GC001444	CHEMICAL COMPOSITION OF SEDIMENTS SUBDUCTING AT THE IZU-BONIN TRENCH	GEOCHEM GEOPHYS GEOSYST	PLANK, T; KELLEY, K; MURRAY, R; STERN, L	ODP185	31.342	143.351	-1	0		65.5	ICPES	SEDIMENTARY	UNKNOWN	UNKNOWN	SILICICLASTIC	54.77	0.611	15.03	6.46				2.12	2.77		3.51	2.02	0.089	0.584
ODP0185-1149A-010H-003/140-150		SEDDB	10.1029/2006GC001444	CHEMICAL COMPOSITION OF SEDIMENTS SUBDUCTING AT THE IZU-BONIN TRENCH	GEOCHEM GEOPHYS GEOSYST	PLANK, T; KELLEY, K; MURRAY, R; STERN, L	ODP185	31.342	143.351	-1	0		65.5	IGN	SEDIMENTARY	UNKNOWN	UNKNOWN	SILICICLASTIC															10.91
ODP0185-1149A-010H-003/140-150		SEDDB	10.1029/2006GC001444	CHEMICAL COMPOSITION OF SEDIMENTS SUBDUCTING AT THE IZU-BONIN TRENCH	GEOCHEM GEOPHYS GEOSYST	PLANK, T; KELLEY, K; MURRAY, R; STERN, L	ODP185	31.342	143.351	-1	0		65.5	MS	SEDIMENTARY	UNKNOWN	UNKNOWN	SILICICLASTIC
ODP0185-1149A-010H-003/140-150		SEDDB	10.1029/2006GC001444	CHEMICAL COMPOSITION OF SEDIMENTS SUBDUCTING AT THE IZU-BONIN TRENCH	GEOCHEM GEOPHYS GEOSYST	PLANK, T; KELLEY, K; MURRAY, R; STERN, L	ODP185	31.342	143.351	-1	0		65.5	TIMS	SEDIMENTARY	UNKNOWN	UNKNOWN	SILICICLASTIC
ODP0185-1149A-010H-003/140-150		SEDDB	10.1029/2008GC002101	Hf -Nd INPUT FLUX IN THE IZU-MARIANA SUBDUCTION ZONE AND RECYCLING OF SUBDUCTED MATERIAL IN THE MANTLE	GEOCHEM GEOPHYS GEOSYST	CHAUVEL, C; MARINI, J-C; PLANK, T; LUDDEN, J	ODP185	31.342	143.351	-1	0		65.5	ICPES	SEDIMENTARY	UNKNOWN	UNKNOWN	SILICICLASTIC	54.77	0.611	15.03	6.46				2.12	2.77		3.51	2.02	0.089	0.584
ODP0185-1149A-010H-003/140-150		SEDDB	10.1029/2008GC002101	Hf -Nd INPUT FLUX IN THE IZU-MARIANA SUBDUCTION ZONE AND RECYCLING OF SUBDUCTED MATERIAL IN THE MANTLE	GEOCHEM GEOPHYS GEOSYST	CHAUVEL, C; MARINI, J-C; PLANK, T; LUDDEN, J	ODP185	31.342	143.351	-1	0		65.5	IGN	SEDIMENTARY	UNKNOWN	UNKNOWN	SILICICLASTIC															10.91
ODP0185-1149A-010H-003/140-150		SEDDB	10.1029/2008GC002101	Hf -Nd INPUT FLUX IN THE IZU-MARIANA SUBDUCTION ZONE AND RECYCLING OF SUBDUCTED MATERIAL IN THE MANTLE	GEOCHEM GEOPHYS GEOSYST	CHAUVEL, C; MARINI, J-C; PLANK, T; LUDDEN, J	ODP185	31.342	143.351	-1	0		65.5	MS	SEDIMENTARY	UNKNOWN	UNKNOWN	SILICICLASTIC
ODP0185-1149A-010H-003/140-150		SEDDB	10.1029/2008GC002101	Hf -Nd INPUT FLUX IN THE IZU-MARIANA SUBDUCTION ZONE AND RECYCLING OF SUBDUCTED MATERIAL IN THE MANTLE	GEOCHEM GEOPHYS GEOSYST	CHAUVEL, C; MARINI, J-C; PLANK, T; LUDDEN, J	ODP185	31.342	143.351	-1	0		65.5	TIMS	SEDIMENTARY	UNKNOWN	UNKNOWN	SILICICLASTIC
ODP0185-1149A-010H-003/140-150		SEDDB	10.1038/ngeo.2007.51	ROLE OF RECYCLED OCEANIC BASALT AND SEDIMENT IN GENERATING THE Hf-Nd MANTLE ARRAY	NATURE GEOSCIENCE	CHAUVEL, C; LEWIN, E; CARPENTIER, M; ARNDT, N; MARINI, J-C	ODP185	31.342	143.351	-1	0		65.5	ICPES	SEDIMENTARY	UNKNOWN	UNKNOWN	SILICICLASTIC	54.77	0.611	15.03	6.46				2.12	2.77		3.51	2.02	0.089	0.584
ODP0185-1149A-010H-003/140-150		SEDDB	10.1038/ngeo.2007.51	ROLE OF RECYCLED OCEANIC BASALT AND SEDIMENT IN GENERATING THE Hf-Nd MANTLE ARRAY	NATURE GEOSCIENCE	CHAUVEL, C; LEWIN, E; CARPENTIER, M; ARNDT, N; MARINI, J-C	ODP185	31.342	143.351	-1	0		65.5	IGN	SEDIMENTARY	UNKNOWN	UNKNOWN	SILICICLASTIC															10.91
ODP0185-1149A-010H-003/140-150		SEDDB	10.1038/ngeo.2007.51	ROLE OF RECYCLED OCEANIC BASALT AND SEDIMENT IN GENERATING THE Hf-Nd MANTLE ARRAY	NATURE GEOSCIENCE	CHAUVEL, C; LEWIN, E; CARPENTIER, M; ARNDT, N; MARINI, J-C	ODP185	31.342	143.351	-1	0		65.5	MS	SEDIMENTARY	UNKNOWN	UNKNOWN	SILICICLASTIC
ODP0185-1149A-010H-003/140-150		SEDDB	10.1038/ngeo.2007.51	ROLE OF RECYCLED OCEANIC BASALT AND SEDIMENT IN GENERATING THE Hf-Nd MANTLE ARRAY	NATURE GEOSCIENCE	CHAUVEL, C; LEWIN, E; CARPENTIER, M; ARNDT, N; MARINI, J-C	ODP185	31.342	143.351	-1	0		65.5	TIMS	SEDIMENTARY	UNKNOWN	UNKNOWN	SILICICLASTIC
ODP0185-1149A-014H-002/140-150		SEDDB	10.1029/2002GC000421	Sr-Nd-Pb COMPOSITION OF MESOZOIC PACIFIC OCEANIC CRUST (SITE 1149 AND 801, ODP LEG 185): IMPLICATIONS FOR ALTERATION OF OCEAN CRUST AND INPUT INTO THE IZU-BONIN-MARIANA SUBDUCTION SYSTEM	GEOCHEM GEOPHYS GEOSYST	HAUFF, F; HOERNLE, K; SCHMIDT, A	ODP185	31.342	143.351	-1		19		ICPES	SEDIMENTARY	UNKNOWN	UNKNOWN	SILICICLASTIC	55.68	0.702	16.12	7.1				3.23	1.56		2.9	2.27	0.077	0.43
ODP0185-1149A-014H-002/140-150		SEDDB	10.1029/2002GC000421	Sr-Nd-Pb COMPOSITION OF MESOZOIC PACIFIC OCEANIC CRUST (SITE 1149 AND 801, ODP LEG 185): IMPLICATIONS FOR ALTERATION OF OCEAN CRUST AND INPUT INTO THE IZU-BONIN-MARIANA SUBDUCTION SYSTEM	GEOCHEM GEOPHYS GEOSYST	HAUFF, F; HOERNLE, K; SCHMIDT, A	ODP185	31.342	143.351	-1		19		IGN	SEDIMENTARY	UNKNOWN	UNKNOWN	SILICICLASTIC															8.44
ODP0185-1149A-014H-002/140-150		SEDDB	10.1029/2002GC000421	Sr-Nd-Pb COMPOSITION OF MESOZOIC PACIFIC OCEANIC CRUST (SITE 1149 AND 801, ODP LEG 185): IMPLICATIONS FOR ALTERATION OF OCEAN CRUST AND INPUT INTO THE IZU-BONIN-MARIANA SUBDUCTION SYSTEM	GEOCHEM GEOPHYS GEOSYST	HAUFF, F; HOERNLE, K; SCHMIDT, A	ODP185	31.342	143.351	-1		19		MS	SEDIMENTARY	UNKNOWN	UNKNOWN	SILICICLASTIC
ODP0185-1149A-014H-002/140-150		SEDDB	10.1029/2002GC000421	Sr-Nd-Pb COMPOSITION OF MESOZOIC PACIFIC OCEANIC CRUST (SITE 1149 AND 801, ODP LEG 185): IMPLICATIONS FOR ALTERATION OF OCEAN CRUST AND INPUT INTO THE IZU-BONIN-MARIANA SUBDUCTION SYSTEM	GEOCHEM GEOPHYS GEOSYST	HAUFF, F; HOERNLE, K; SCHMIDT, A	ODP185	31.342	143.351	-1		19		TIMS	SEDIMENTARY	UNKNOWN	UNKNOWN	SILICICLASTIC
ODP0185-1149A-014H-002/140-150		SEDDB	10.1029/2008GC002101	Hf -Nd INPUT FLUX IN THE IZU-MARIANA SUBDUCTION ZONE AND RECYCLING OF SUBDUCTED MATERIAL IN THE MANTLE	GEOCHEM GEOPHYS GEOSYST	CHAUVEL, C; MARINI, J-C; PLANK, T; LUDDEN, J	ODP185	31.342	143.351	-1		19		ICPES	SEDIMENTARY	UNKNOWN	UNKNOWN	SILICICLASTIC	55.68	0.702	16.12	7.1				3.23	1.56		2.9	2.27	0.077	0.43
ODP0185-1149A-014H-002/140-150		SEDDB	10.1029/2008GC002101	Hf -Nd INPUT FLUX IN THE IZU-MARIANA SUBDUCTION ZONE AND RECYCLING OF SUBDUCTED MATERIAL IN THE MANTLE	GEOCHEM GEOPHYS GEOSYST	CHAUVEL, C; MARINI, J-C; PLANK, T; LUDDEN, J	ODP185	31.342	143.351	-1		19		IGN	SEDIMENTARY	UNKNOWN	UNKNOWN	SILICICLASTIC															8.44
ODP0185-1149A-014H-002/140-150		SEDDB	10.1029/2008GC002101	Hf -Nd INPUT FLUX IN THE IZU-MARIANA SUBDUCTION ZONE AND RECYCLING OF SUBDUCTED MATERIAL IN THE MANTLE	GEOCHEM GEOPHYS GEOSYST	CHAUVEL, C; MARINI, J-C; PLANK, T; LUDDEN, J	ODP185	31.342	143.351	-1		19		MS	SEDIMENTARY	UNKNOWN	UNKNOWN	SILICICLASTIC
ODP0185-1149A-014H-002/140-150		SEDDB	10.1029/2008GC002101	Hf -Nd INPUT FLUX IN THE IZU-MARIANA SUBDUCTION ZONE AND RECYCLING OF SUBDUCTED MATERIAL IN THE MANTLE	GEOCHEM GEOPHYS GEOSYST	CHAUVEL, C; MARINI, J-C; PLANK, T; LUDDEN, J	ODP185	31.342	143.351	-1		19		TIMS	SEDIMENTARY	UNKNOWN	UNKNOWN	SILICICLASTIC
ODP0185-1149A-014H-002/140-150		SEDDB	10.1038/ngeo.2007.51	ROLE OF RECYCLED OCEANIC BASALT AND SEDIMENT IN GENERATING THE Hf-Nd MANTLE ARRAY	NATURE GEOSCIENCE	CHAUVEL, C; LEWIN, E; CARPENTIER, M; ARNDT, N; MARINI, J-C	ODP185	31.342	143.351	-1		19		ICPES	SEDIMENTARY	UNKNOWN	UNKNOWN	SILICICLASTIC	55.68	0.702	16.12	7.1				3.23	1.56		2.9	2.27	0.077	0.43
ODP0185-1149A-014H-002/140-150		SEDDB	10.1038/ngeo.2007.51	ROLE OF RECYCLED OCEANIC BASALT AND SEDIMENT IN GENERATING THE Hf-Nd MANTLE ARRAY	NATURE GEOSCIENCE	CHAUVEL, C; LEWIN, E; CARPENTIER, M; ARNDT, N; MARINI, J-C	ODP185	31.342	143.351	-1		19		IGN	SEDIMENTARY	UNKNOWN	UNKNOWN	SILICICLASTIC															8.44
ODP0185-1149A-014H-002/140-150		SEDDB	10.1038/ngeo.2007.51	ROLE OF RECYCLED OCEANIC BASALT AND SEDIMENT IN GENERATING THE Hf-Nd MANTLE ARRAY	NATURE GEOSCIENCE	CHAUVEL, C; LEWIN, E; CARPENTIER, M; ARNDT, N; MARINI, J-C	ODP185	31.342	143.351	-1		19		MS	SEDIMENTARY	UNKNOWN	UNKNOWN	SILICICLASTIC
ODP0185-1149A-014H-002/140-150		SEDDB	10.1038/ngeo.2007.51	ROLE OF RECYCLED OCEANIC BASALT AND SEDIMENT IN GENERATING THE Hf-Nd MANTLE ARRAY	NATURE GEOSCIENCE	CHAUVEL, C; LEWIN, E; CARPENTIER, M; ARNDT, N; MARINI, J-C	ODP185	31.342	143.351	-1		19		TIMS	SEDIMENTARY	UNKNOWN	UNKNOWN	SILICICLASTIC
ODP0185-1149A-014H-002/140-150		SEDDB	10.1029/2006GC001444	CHEMICAL COMPOSITION OF SEDIMENTS SUBDUCTING AT THE IZU-BONIN TRENCH	GEOCHEM GEOPHYS GEOSYST	PLANK, T; KELLEY, K; MURRAY, R; STERN, L	ODP185	31.342	143.351	-1		19		ICPES	SEDIMENTARY	UNKNOWN	UNKNOWN	SILICICLASTIC	55.68	0.702	16.12	7.1				3.23	1.56		2.9	2.27	0.077	0.43
ODP0185-1149A-014H-002/140-150		SEDDB	10.1029/2006GC001444	CHEMICAL COMPOSITION OF SEDIMENTS SUBDUCTING AT THE IZU-BONIN TRENCH	GEOCHEM GEOPHYS GEOSYST	PLANK, T; KELLEY, K; MURRAY, R; STERN, L	ODP185	31.342	143.351	-1		19		IGN	SEDIMENTARY	UNKNOWN	UNKNOWN	SILICICLASTIC															8.44
ODP0185-1149A-014H-002/140-150		SEDDB	10.1029/2006GC001444	CHEMICAL COMPOSITION OF SEDIMENTS SUBDUCTING AT THE IZU-BONIN TRENCH	GEOCHEM GEOPHYS GEOSYST	PLANK, T; KELLEY, K; MURRAY, R; STERN, L	ODP185	31.342	143.351	-1		19		MS	SEDIMENTARY	UNKNOWN	UNKNOWN	SILICICLASTIC
ODP0185-1149A-014H-002/140-150		SEDDB	10.1029/2006GC001444	CHEMICAL COMPOSITION OF SEDIMENTS SUBDUCTING AT THE IZU-BONIN TRENCH	GEOCHEM GEOPHYS GEOSYST	PLANK, T; KELLEY, K; MURRAY, R; STERN, L	ODP185	31.342	143.351	-1		19		TIMS	SEDIMENTARY	UNKNOWN	UNKNOWN	SILICICLASTIC
ODP0185-1149A-020X-001/140-150		SEDDB	10.1029/2002GC000421	Sr-Nd-Pb COMPOSITION OF MESOZOIC PACIFIC OCEANIC CRUST (SITE 1149 AND 801, ODP LEG 185): IMPLICATIONS FOR ALTERATION OF OCEAN CRUST AND INPUT INTO THE IZU-BONIN-MARIANA SUBDUCTION SYSTEM	GEOCHEM GEOPHYS GEOSYST	HAUFF, F; HOERNLE, K; SCHMIDT, A	ODP185	31.342	143.351	-1		44		ICPES	SEDIMENTARY	UNKNOWN	UNKNOWN	SILICICLASTIC	50.98	0.675	14.08	7.83				3.03	2.18		1.36	2.75	1.621	1.485
ODP0185-1149A-020X-001/140-150		SEDDB	10.1029/2002GC000421	Sr-Nd-Pb COMPOSITION OF MESOZOIC PACIFIC OCEANIC CRUST (SITE 1149 AND 801, ODP LEG 185): IMPLICATIONS FOR ALTERATION OF OCEAN CRUST AND INPUT INTO THE IZU-BONIN-MARIANA SUBDUCTION SYSTEM	GEOCHEM GEOPHYS GEOSYST	HAUFF, F; HOERNLE, K; SCHMIDT, A	ODP185	31.342	143.351	-1		44		IGN	SEDIMENTARY	UNKNOWN	UNKNOWN	SILICICLASTIC															13.15
ODP0185-1149A-020X-001/140-150		SEDDB	10.1029/2002GC000421	Sr-Nd-Pb COMPOSITION OF MESOZOIC PACIFIC OCEANIC CRUST (SITE 1149 AND 801, ODP LEG 185): IMPLICATIONS FOR ALTERATION OF OCEAN CRUST AND INPUT INTO THE IZU-BONIN-MARIANA SUBDUCTION SYSTEM	GEOCHEM GEOPHYS GEOSYST	HAUFF, F; HOERNLE, K; SCHMIDT, A	ODP185	31.342	143.351	-1		44		MS	SEDIMENTARY	UNKNOWN	UNKNOWN	SILICICLASTIC
ODP0185-1149A-020X-001/140-150		SEDDB	10.1029/2002GC000421	Sr-Nd-Pb COMPOSITION OF MESOZOIC PACIFIC OCEANIC CRUST (SITE 1149 AND 801, ODP LEG 185): IMPLICATIONS FOR ALTERATION OF OCEAN CRUST AND INPUT INTO THE IZU-BONIN-MARIANA SUBDUCTION SYSTEM	GEOCHEM GEOPHYS GEOSYST	HAUFF, F; HOERNLE, K; SCHMIDT, A	ODP185	31.342	143.351	-1		44		TIMS	SEDIMENTARY	UNKNOWN	UNKNOWN	SILICICLASTIC
ODP0185-1149A-020X-001/140-150		SEDDB	10.1029/2008GC002101	Hf -Nd INPUT FLUX IN THE IZU-MARIANA SUBDUCTION ZONE AND RECYCLING OF SUBDUCTED MATERIAL IN THE MANTLE	GEOCHEM GEOPHYS GEOSYST	CHAUVEL, C; MARINI, J-C; PLANK, T; LUDDEN, J	ODP185	31.342	143.351	-1		44		ICPES	SEDIMENTARY	UNKNOWN	UNKNOWN	SILICICLASTIC	50.98	0.675	14.08	7.83				3.03	2.18		1.36	2.75	1.621	1.485
ODP0185-1149A-020X-001/140-150		SEDDB	10.1029/2008GC002101	Hf -Nd INPUT FLUX IN THE IZU-MARIANA SUBDUCTION ZONE AND RECYCLING OF SUBDUCTED MATERIAL IN THE MANTLE	GEOCHEM GEOPHYS GEOSYST	CHAUVEL, C; MARINI, J-C; PLANK, T; LUDDEN, J	ODP185	31.342	143.351	-1		44		IGN	SEDIMENTARY	UNKNOWN	UNKNOWN	SILICICLASTIC															13.15
ODP0185-1149A-020X-001/140-150		SEDDB	10.1029/2008GC002101	Hf -Nd INPUT FLUX IN THE IZU-MARIANA SUBDUCTION ZONE AND RECYCLING OF SUBDUCTED MATERIAL IN THE MANTLE	GEOCHEM GEOPHYS GEOSYST	CHAUVEL, C; MARINI, J-C; PLANK, T; LUDDEN, J	ODP185	31.342	143.351	-1		44		MS	SEDIMENTARY	UNKNOWN	UNKNOWN	SILICICLASTIC
ODP0185-1149A-020X-001/140-150		SEDDB	10.1029/2008GC002101	Hf -Nd INPUT FLUX IN THE IZU-MARIANA SUBDUCTION ZONE AND RECYCLING OF SUBDUCTED MATERIAL IN THE MANTLE	GEOCHEM GEOPHYS GEOSYST	CHAUVEL, C; MARINI, J-C; PLANK, T; LUDDEN, J	ODP185	31.342	143.351	-1		44		TIMS	SEDIMENTARY	UNKNOWN	UNKNOWN	SILICICLASTIC
ODP0185-1149A-020X-001/140-150		SEDDB	10.1038/ngeo.2007.51	ROLE OF RECYCLED OCEANIC BASALT AND SEDIMENT IN GENERATING THE Hf-Nd MANTLE ARRAY	NATURE GEOSCIENCE	CHAUVEL, C; LEWIN, E; CARPENTIER, M; ARNDT, N; MARINI, J-C	ODP185	31.342	143.351	-1		44		ICPES	SEDIMENTARY	UNKNOWN	UNKNOWN	SILICICLASTIC	50.98	0.675	14.08	7.83				3.03	2.18		1.36	2.75	1.621	1.485
ODP0185-1149A-020X-001/140-150		SEDDB	10.1038/ngeo.2007.51	ROLE OF RECYCLED OCEANIC BASALT AND SEDIMENT IN GENERATING THE Hf-Nd MANTLE ARRAY	NATURE GEOSCIENCE	CHAUVEL, C; LEWIN, E; CARPENTIER, M; ARNDT, N; MARINI, J-C	ODP185	31.342	143.351	-1		44		IGN	SEDIMENTARY	UNKNOWN	UNKNOWN	SILICICLASTIC															13.15
ODP0185-1149A-020X-001/140-150		SEDDB	10.1038/ngeo.2007.51	ROLE OF RECYCLED OCEANIC BASALT AND SEDIMENT IN GENERATING THE Hf-Nd MANTLE ARRAY	NATURE GEOSCIENCE	CHAUVEL, C; LEWIN, E; CARPENTIER, M; ARNDT, N; MARINI, J-C	ODP185	31.342	143.351	-1		44		MS	SEDIMENTARY	UNKNOWN	UNKNOWN	SILICICLASTIC
ODP0185-1149A-020X-001/140-150		SEDDB	10.1038/ngeo.2007.51	ROLE OF RECYCLED OCEANIC BASALT AND SEDIMENT IN GENERATING THE Hf-Nd MANTLE ARRAY	NATURE GEOSCIENCE	CHAUVEL, C; LEWIN, E; CARPENTIER, M; ARNDT, N; MARINI, J-C	ODP185	31.342	143.351	-1		44		TIMS	SEDIMENTARY	UNKNOWN	UNKNOWN	SILICICLASTIC
ODP0185-1149A-020X-001/140-150		SEDDB	10.1029/2006GC001444	CHEMICAL COMPOSITION OF SEDIMENTS SUBDUCTING AT THE IZU-BONIN TRENCH	GEOCHEM GEOPHYS GEOSYST	PLANK, T; KELLEY, K; MURRAY, R; STERN, L	ODP185	31.342	143.351	-1		44		ICPES	SEDIMENTARY	UNKNOWN	UNKNOWN	SILICICLASTIC	50.98	0.675	14.08	7.83				3.03	2.18		1.36	2.75	1.621	1.485
ODP0185-1149A-020X-001/140-150		SEDDB	10.1029/2006GC001444	CHEMICAL COMPOSITION OF SEDIMENTS SUBDUCTING AT THE IZU-BONIN TRENCH	GEOCHEM GEOPHYS GEOSYST	PLANK, T; KELLEY, K; MURRAY, R; STERN, L	ODP185	31.342	143.351	-1		44		IGN	SEDIMENTARY	UNKNOWN	UNKNOWN	SILICICLASTIC															13.15
ODP0185-1149A-020X-001/140-150		SEDDB	10.1029/2006GC001444	CHEMICAL COMPOSITION OF SEDIMENTS SUBDUCTING AT THE IZU-BONIN TRENCH	GEOCHEM GEOPHYS GEOSYST	PLANK, T; KELLEY, K; MURRAY, R; STERN, L	ODP185	31.342	143.351	-1		44		MS	SEDIMENTARY	UNKNOWN	UNKNOWN	SILICICLASTIC
ODP0185-1149A-020X-001/140-150		SEDDB	10.1029/2006GC001444	CHEMICAL COMPOSITION OF SEDIMENTS SUBDUCTING AT THE IZU-BONIN TRENCH	GEOCHEM GEOPHYS GEOSYST	PLANK, T; KELLEY, K; MURRAY, R; STERN, L	ODP185	31.342	143.351	-1		44		TIMS	SEDIMENTARY	UNKNOWN	UNKNOWN	SILICICLASTIC
ODP0129-0800A-004R-002/25-30		SEDDB	10.2973/odp.proc.sr.129.124.1992	MAJOR ELEMENT AND Sr ISOTOPE COMPOSITION OF INTERSTITIAL WATERS IN SEDIMENTS FROM LEG 129; THE ROLE OF DIAGENETIC REACTIONS	PROC ODP, SCI RESULTS	FRANCE-LANORD, C; MICHARD, A; KARPOFF, A	ODP129	21.923	152.323	-1	0		65.5	IGN	SEDIMENTARY	UNKNOWN	UNKNOWN	SILICICLASTIC															11.14
ODP0129-0800A-004R-002/25-30		SEDDB	10.2973/odp.proc.sr.129.124.1992	MAJOR ELEMENT AND Sr ISOTOPE COMPOSITION OF INTERSTITIAL WATERS IN SEDIMENTS FROM LEG 129; THE ROLE OF DIAGENETIC REACTIONS	PROC ODP, SCI RESULTS	FRANCE-LANORD, C; MICHARD, A; KARPOFF, A	ODP129	21.923	152.323	-1	0		65.5	ICPMS	SEDIMENTARY	UNKNOWN	UNKNOWN	SILICICLASTIC	49.1	0.59	14.78		6.41			3.11	4.45		1.92	3.94	2.41	2.29
ODP0129-0801B-033R-001/143-150		SEDDB	10.1016/j.gca.2011.07.046	THE Hf-Nd ISOTOPIC COMPOSITION OF MARINE SEDIMENTS	GEOCHIM COSMOCHIM ACTA	VERVOORT, J; PLANK, T; PRYTULAK, J	ODP129	18.642	156.36	-1	145.5		199.6	MC-ICP-MS	SEDIMENTARY	UNKNOWN	UNKNOWN	SILICICLASTIC
ODP0129-0801B-033R-001/143-150		SEDDB	10.1016/j.gca.2011.07.046	THE Hf-Nd ISOTOPIC COMPOSITION OF MARINE SEDIMENTS	GEOCHIM COSMOCHIM ACTA	VERVOORT, J; PLANK, T; PRYTULAK, J	ODP129	18.642	156.36	-1	145.5		199.6	IGN	SEDIMENTARY	UNKNOWN	UNKNOWN	SILICICLASTIC															6.15
ODP0129-0801B-033R-001/143-150		SEDDB	10.1016/j.gca.2011.07.046	THE Hf-Nd ISOTOPIC COMPOSITION OF MARINE SEDIMENTS	GEOCHIM COSMOCHIM ACTA	VERVOORT, J; PLANK, T; PRYTULAK, J	ODP129	18.642	156.36	-1	145.5		199.6	ICPMS	SEDIMENTARY	UNKNOWN	UNKNOWN	SILICICLASTIC	73.1	0.51	7.28		7.19			1.67	0.28		0.93	2.29	0.15	0.02
ODP0129-0801B-033R-001/143-150		SEDDB	10.1016/j.gca.2011.07.046	THE Hf-Nd ISOTOPIC COMPOSITION OF MARINE SEDIMENTS	GEOCHIM COSMOCHIM ACTA	VERVOORT, J; PLANK, T; PRYTULAK, J	ODP129	18.642	156.36	-1	145.5		199.6	MC-ICPMS-ID	SEDIMENTARY	UNKNOWN	UNKNOWN	SILICICLASTIC																						18.1	3.47
ODP0129-0801B-033R-001/143-150		SEDDB	10.2973/odp.proc.sr.129.124.1992	MAJOR ELEMENT AND Sr ISOTOPE COMPOSITION OF INTERSTITIAL WATERS IN SEDIMENTS FROM LEG 129; THE ROLE OF DIAGENETIC REACTIONS	PROC ODP, SCI RESULTS	FRANCE-LANORD, C; MICHARD, A; KARPOFF, A	ODP129	18.642	156.36	-1	145.5		199.6	MC-ICP-MS	SEDIMENTARY	UNKNOWN	UNKNOWN	SILICICLASTIC
ODP0129-0801B-033R-001/143-150		SEDDB	10.2973/odp.proc.sr.129.124.1992	MAJOR ELEMENT AND Sr ISOTOPE COMPOSITION OF INTERSTITIAL WATERS IN SEDIMENTS FROM LEG 129; THE ROLE OF DIAGENETIC REACTIONS	PROC ODP, SCI RESULTS	FRANCE-LANORD, C; MICHARD, A; KARPOFF, A	ODP129	18.642	156.36	-1	145.5		199.6	IGN	SEDIMENTARY	UNKNOWN	UNKNOWN	SILICICLASTIC															6.15
ODP0129-0801B-033R-001/143-150		SEDDB	10.2973/odp.proc.sr.129.124.1992	MAJOR ELEMENT AND Sr ISOTOPE COMPOSITION OF INTERSTITIAL WATERS IN SEDIMENTS FROM LEG 129; THE ROLE OF DIAGENETIC REACTIONS	PROC ODP, SCI RESULTS	FRANCE-LANORD, C; MICHARD, A; KARPOFF, A	ODP129	18.642	156.36	-1	145.5		199.6	ICPMS	SEDIMENTARY	UNKNOWN	UNKNOWN	SILICICLASTIC	73.1	0.51	7.28		7.19			1.67	0.28		0.93	2.29	0.15	0.02
ODP0129-0801B-033R-001/143-150		SEDDB	10.2973/odp.proc.sr.129.124.1992	MAJOR ELEMENT AND Sr ISOTOPE COMPOSITION OF INTERSTITIAL WATERS IN SEDIMENTS FROM LEG 129; THE ROLE OF DIAGENETIC REACTIONS	PROC ODP, SCI RESULTS	FRANCE-LANORD, C; MICHARD, A; KARPOFF, A	ODP129	18.642	156.36	-1	145.5		199.6	MC-ICPMS-ID	SEDIMENTARY	UNKNOWN	UNKNOWN	SILICICLASTIC																						18.1	3.47
ODP0129-0802A-013R-001/53-58		SEDDB	10.2973/odp.proc.sr.129.124.1992	MAJOR ELEMENT AND Sr ISOTOPE COMPOSITION OF INTERSTITIAL WATERS IN SEDIMENTS FROM LEG 129; THE ROLE OF DIAGENETIC REACTIONS	PROC ODP, SCI RESULTS	FRANCE-LANORD, C; MICHARD, A; KARPOFF, A	ODP129	12.0963	153.21	-1	0		65.5	IGN	SEDIMENTARY	UNKNOWN	UNKNOWN	SILICICLASTIC															16.87
ODP0129-0802A-013R-001/53-58		SEDDB	10.2973/odp.proc.sr.129.124.1992	MAJOR ELEMENT AND Sr ISOTOPE COMPOSITION OF INTERSTITIAL WATERS IN SEDIMENTS FROM LEG 129; THE ROLE OF DIAGENETIC REACTIONS	PROC ODP, SCI RESULTS	FRANCE-LANORD, C; MICHARD, A; KARPOFF, A	ODP129	12.0963	153.21	-1	0		65.5	ICPMS	SEDIMENTARY	UNKNOWN	UNKNOWN	SILICICLASTIC	48.87	0.65	11.5		7.69			3.02	4.19		2.88	1.58	0.75	1.58
ODP0129-0802A-026R-001/0-10		SEDDB	10.2973/odp.proc.sr.129.124.1992	MAJOR ELEMENT AND Sr ISOTOPE COMPOSITION OF INTERSTITIAL WATERS IN SEDIMENTS FROM LEG 129; THE ROLE OF DIAGENETIC REACTIONS	PROC ODP, SCI RESULTS	FRANCE-LANORD, C; MICHARD, A; KARPOFF, A	ODP129	12.0963	153.21	-1	5.332		23.03	IGN	SEDIMENTARY	UNKNOWN	UNKNOWN	SILICICLASTIC															17.7
ODP0129-0802A-026R-001/0-10		SEDDB	10.2973/odp.proc.sr.129.124.1992	MAJOR ELEMENT AND Sr ISOTOPE COMPOSITION OF INTERSTITIAL WATERS IN SEDIMENTS FROM LEG 129; THE ROLE OF DIAGENETIC REACTIONS	PROC ODP, SCI RESULTS	FRANCE-LANORD, C; MICHARD, A; KARPOFF, A	ODP129	12.0963	153.21	-1	5.332		23.03	ICPMS	SEDIMENTARY	UNKNOWN	UNKNOWN	SILICICLASTIC	37.59	1.53	9.89		8.6			4.47	14.98		2.61	1.72	0.27	0.2
ODP0129-0801A-003R-002/145-150		SEDDB	10.1016/j.gca.2011.07.046	THE Hf-Nd ISOTOPIC COMPOSITION OF MARINE SEDIMENTS	GEOCHIM COSMOCHIM ACTA	VERVOORT, J; PLANK, T; PRYTULAK, J	ODP129	18.6428	156.359	-1	0		65.5	MC-ICP-MS	SEDIMENTARY	UNKNOWN	UNKNOWN	SILICICLASTIC
ODP0129-0801A-003R-002/145-150		SEDDB	10.1016/j.gca.2011.07.046	THE Hf-Nd ISOTOPIC COMPOSITION OF MARINE SEDIMENTS	GEOCHIM COSMOCHIM ACTA	VERVOORT, J; PLANK, T; PRYTULAK, J	ODP129	18.6428	156.359	-1	0		65.5	IGN	SEDIMENTARY	UNKNOWN	UNKNOWN	SILICICLASTIC															11.43
ODP0129-0801A-003R-002/145-150		SEDDB	10.1016/j.gca.2011.07.046	THE Hf-Nd ISOTOPIC COMPOSITION OF MARINE SEDIMENTS	GEOCHIM COSMOCHIM ACTA	VERVOORT, J; PLANK, T; PRYTULAK, J	ODP129	18.6428	156.359	-1	0		65.5	ICPMS	SEDIMENTARY	UNKNOWN	UNKNOWN	SILICICLASTIC	49.56	0.61	16.82		7.34			3.27	1.85		2.09	4.15	1.04	2.15
ODP0129-0801A-003R-002/145-150		SEDDB	10.1016/j.gca.2011.07.046	THE Hf-Nd ISOTOPIC COMPOSITION OF MARINE SEDIMENTS	GEOCHIM COSMOCHIM ACTA	VERVOORT, J; PLANK, T; PRYTULAK, J	ODP129	18.6428	156.359	-1	0		65.5	MC-ICPMS-ID	SEDIMENTARY	UNKNOWN	UNKNOWN	SILICICLASTIC																						152	35.9
ODP0129-0801A-003R-002/145-150		SEDDB	10.2973/odp.proc.sr.129.124.1992	MAJOR ELEMENT AND Sr ISOTOPE COMPOSITION OF INTERSTITIAL WATERS IN SEDIMENTS FROM LEG 129; THE ROLE OF DIAGENETIC REACTIONS	PROC ODP, SCI RESULTS	FRANCE-LANORD, C; MICHARD, A; KARPOFF, A	ODP129	18.6428	156.359	-1	0		65.5	MC-ICP-MS	SEDIMENTARY	UNKNOWN	UNKNOWN	SILICICLASTIC
ODP0129-0801A-003R-002/145-150		SEDDB	10.2973/odp.proc.sr.129.124.1992	MAJOR ELEMENT AND Sr ISOTOPE COMPOSITION OF INTERSTITIAL WATERS IN SEDIMENTS FROM LEG 129; THE ROLE OF DIAGENETIC REACTIONS	PROC ODP, SCI RESULTS	FRANCE-LANORD, C; MICHARD, A; KARPOFF, A	ODP129	18.6428	156.359	-1	0		65.5	IGN	SEDIMENTARY	UNKNOWN	UNKNOWN	SILICICLASTIC															11.43
ODP0129-0801A-003R-002/145-150		SEDDB	10.2973/odp.proc.sr.129.124.1992	MAJOR ELEMENT AND Sr ISOTOPE COMPOSITION OF INTERSTITIAL WATERS IN SEDIMENTS FROM LEG 129; THE ROLE OF DIAGENETIC REACTIONS	PROC ODP, SCI RESULTS	FRANCE-LANORD, C; MICHARD, A; KARPOFF, A	ODP129	18.6428	156.359	-1	0		65.5	ICPMS	SEDIMENTARY	UNKNOWN	UNKNOWN	SILICICLASTIC	49.56	0.61	16.82		7.34			3.27	1.85		2.09	4.15	1.04	2.15
ODP0129-0801A-003R-002/145-150		SEDDB	10.2973/odp.proc.sr.129.124.1992	MAJOR ELEMENT AND Sr ISOTOPE COMPOSITION OF INTERSTITIAL WATERS IN SEDIMENTS FROM LEG 129; THE ROLE OF DIAGENETIC REACTIONS	PROC ODP, SCI RESULTS	FRANCE-LANORD, C; MICHARD, A; KARPOFF, A	ODP129	18.6428	156.359	-1	0		65.5	MC-ICPMS-ID	SEDIMENTARY	UNKNOWN	UNKNOWN	SILICICLASTIC																						152	35.9
ODP0129-0801B-035R-002/0-10		SEDDB	10.2973/odp.proc.sr.129.124.1992	MAJOR ELEMENT AND Sr ISOTOPE COMPOSITION OF INTERSTITIAL WATERS IN SEDIMENTS FROM LEG 129; THE ROLE OF DIAGENETIC REACTIONS	PROC ODP, SCI RESULTS	FRANCE-LANORD, C; MICHARD, A; KARPOFF, A	ODP129	18.642	156.36	-1	145.5		199.6	IGN	SEDIMENTARY	UNKNOWN	UNKNOWN	SILICICLASTIC															7.74
ODP0129-0801B-035R-002/0-10		SEDDB	10.2973/odp.proc.sr.129.124.1992	MAJOR ELEMENT AND Sr ISOTOPE COMPOSITION OF INTERSTITIAL WATERS IN SEDIMENTS FROM LEG 129; THE ROLE OF DIAGENETIC REACTIONS	PROC ODP, SCI RESULTS	FRANCE-LANORD, C; MICHARD, A; KARPOFF, A	ODP129	18.642	156.36	-1	145.5		199.6	ICPMS	SEDIMENTARY	UNKNOWN	UNKNOWN	SILICICLASTIC	65	0.6	8.41		11.21			2.04	0.48		1.02	2.72	0.27	0.08
ODP0129-0802A-029R-003/29-34		SEDDB	10.2973/odp.proc.sr.129.124.1992	MAJOR ELEMENT AND Sr ISOTOPE COMPOSITION OF INTERSTITIAL WATERS IN SEDIMENTS FROM LEG 129; THE ROLE OF DIAGENETIC REACTIONS	PROC ODP, SCI RESULTS	FRANCE-LANORD, C; MICHARD, A; KARPOFF, A	ODP129	12.0963	153.21	-1	5.332		23.03	IGN	SEDIMENTARY	UNKNOWN	UNKNOWN	SILICICLASTIC															13.63
ODP0129-0802A-029R-003/29-34		SEDDB	10.2973/odp.proc.sr.129.124.1992	MAJOR ELEMENT AND Sr ISOTOPE COMPOSITION OF INTERSTITIAL WATERS IN SEDIMENTS FROM LEG 129; THE ROLE OF DIAGENETIC REACTIONS	PROC ODP, SCI RESULTS	FRANCE-LANORD, C; MICHARD, A; KARPOFF, A	ODP129	12.0963	153.21	-1	5.332		23.03	ICPMS	SEDIMENTARY	UNKNOWN	UNKNOWN	SILICICLASTIC	52.71	0.51	10.96		8.33			2.88	3.55		2.7	1.63	0.83	2.02
ODP0129-0801A-005R-002/145-150		SEDDB	10.2973/odp.proc.sr.129.124.1992	MAJOR ELEMENT AND Sr ISOTOPE COMPOSITION OF INTERSTITIAL WATERS IN SEDIMENTS FROM LEG 129; THE ROLE OF DIAGENETIC REACTIONS	PROC ODP, SCI RESULTS	FRANCE-LANORD, C; MICHARD, A; KARPOFF, A	ODP129	18.6428	156.359	-1	55.8		65.5	IGN	SEDIMENTARY	UNKNOWN	UNKNOWN	SILICICLASTIC															10.51
ODP0129-0801A-005R-002/145-150		SEDDB	10.2973/odp.proc.sr.129.124.1992	MAJOR ELEMENT AND Sr ISOTOPE COMPOSITION OF INTERSTITIAL WATERS IN SEDIMENTS FROM LEG 129; THE ROLE OF DIAGENETIC REACTIONS	PROC ODP, SCI RESULTS	FRANCE-LANORD, C; MICHARD, A; KARPOFF, A	ODP129	18.6428	156.359	-1	55.8		65.5	ICPMS	SEDIMENTARY	UNKNOWN	UNKNOWN	SILICICLASTIC	54.46	0.55	15.13		6.04			2.97	1.75		2.09	4.27	0.98	0.96
ODP0129-0801A-019R-002/65-73		SEDDB	10.2973/odp.proc.sr.129.124.1992	MAJOR ELEMENT AND Sr ISOTOPE COMPOSITION OF INTERSTITIAL WATERS IN SEDIMENTS FROM LEG 129; THE ROLE OF DIAGENETIC REACTIONS	PROC ODP, SCI RESULTS	FRANCE-LANORD, C; MICHARD, A; KARPOFF, A	ODP129	18.6428	156.359	-1	65.5		145.5	IGN	SEDIMENTARY	UNKNOWN	UNKNOWN	SILICICLASTIC															9.24
ODP0129-0801A-019R-002/65-73		SEDDB	10.2973/odp.proc.sr.129.124.1992	MAJOR ELEMENT AND Sr ISOTOPE COMPOSITION OF INTERSTITIAL WATERS IN SEDIMENTS FROM LEG 129; THE ROLE OF DIAGENETIC REACTIONS	PROC ODP, SCI RESULTS	FRANCE-LANORD, C; MICHARD, A; KARPOFF, A	ODP129	18.6428	156.359	-1	65.5		145.5	ICPMS	SEDIMENTARY	UNKNOWN	UNKNOWN	SILICICLASTIC	63.62	1.36	6.76		6.4			3.67	4.76		1.97	2.16	0.26	0.08
ODP0129-0802A-021R-001/103-110		SEDDB	10.2973/odp.proc.sr.129.124.1992	MAJOR ELEMENT AND Sr ISOTOPE COMPOSITION OF INTERSTITIAL WATERS IN SEDIMENTS FROM LEG 129; THE ROLE OF DIAGENETIC REACTIONS	PROC ODP, SCI RESULTS	FRANCE-LANORD, C; MICHARD, A; KARPOFF, A	ODP129	12.0963	153.21	-1	5.332		23.03	IGN	SEDIMENTARY	UNKNOWN	UNKNOWN	SILICICLASTIC															10.28
ODP0129-0802A-021R-001/103-110		SEDDB	10.2973/odp.proc.sr.129.124.1992	MAJOR ELEMENT AND Sr ISOTOPE COMPOSITION OF INTERSTITIAL WATERS IN SEDIMENTS FROM LEG 129; THE ROLE OF DIAGENETIC REACTIONS	PROC ODP, SCI RESULTS	FRANCE-LANORD, C; MICHARD, A; KARPOFF, A	ODP129	12.0963	153.21	-1	5.332		23.03	ICPMS	SEDIMENTARY	UNKNOWN	UNKNOWN	SILICICLASTIC	43.32	2.62	10.71		11.13			8.38	6.44		3.97	1.51	0.36	0.15
DSDP019-0183-027R-003/87-89		SEDDB	10.1016/0016-7037(88)90206-2	CRUSTAL RECYCLING AND THE ALEUTIAN ARC	GEOCHIM COSMOCHIM ACTA	KAY, R; KAY, S	DSDP Leg 19	52.5717	-161.206	-1	0		65.5	INAA	SEDIMENTARY	UNKNOWN	UNKNOWN	SILICICLASTIC						4.87					3.03			0.077				23.7		48.3		20.9	4.64	1.1		0.645					2.04
DSDP019-0183-031R-001/50-52		SEDDB	10.1029/2005gc001202	LITHIUM ISOTOPIC COMPOSITION OF MARINE SEDIMENTS	GEOCHEM GEOPHYS GEOSYST	CHAN, L; LEEMAN, W; PLANK, T	DSDP Leg 19	52.5717	-161.206	-1	23.03		33.9	INAA	SEDIMENTARY	UNKNOWN	UNKNOWN	SILICICLASTIC						6.33					2.42			0.067				23.2		49.7		22.3	4.18	0.98		0.543					1.79
DSDP019-0183-031R-001/50-52		SEDDB	10.1029/2005gc001202	LITHIUM ISOTOPIC COMPOSITION OF MARINE SEDIMENTS	GEOCHEM GEOPHYS GEOSYST	CHAN, L; LEEMAN, W; PLANK, T	DSDP Leg 19	52.5717	-161.206	-1	23.03		33.9	ICPMS	SEDIMENTARY	UNKNOWN	UNKNOWN	SILICICLASTIC		0.641																21		43.66	5.11	19.7	3.89	0.98	3.85	0.593	3.47	0.735	2.06		2.07
DSDP019-0183-031R-001/50-52		SEDDB	10.1016/0016-7037(88)90206-2	CRUSTAL RECYCLING AND THE ALEUTIAN ARC	GEOCHIM COSMOCHIM ACTA	KAY, R; KAY, S	DSDP Leg 19	52.5717	-161.206	-1	23.03		33.9	INAA	SEDIMENTARY	UNKNOWN	UNKNOWN	SILICICLASTIC						6.33					2.42			0.067				23.2		49.7		22.3	4.18	0.98		0.543					1.79
DSDP019-0183-031R-001/50-52		SEDDB	10.1016/0016-7037(88)90206-2	CRUSTAL RECYCLING AND THE ALEUTIAN ARC	GEOCHIM COSMOCHIM ACTA	KAY, R; KAY, S	DSDP Leg 19	52.5717	-161.206	-1	23.03		33.9	ICPMS	SEDIMENTARY	UNKNOWN	UNKNOWN	SILICICLASTIC		0.641																21		43.66	5.11	19.7	3.89	0.98	3.85	0.593	3.47	0.735	2.06		2.07
DSDP061-0462A-043R-002/123-125		SEDDB	10.1016/0016-7037(88)90206-2	CRUSTAL RECYCLING AND THE ALEUTIAN ARC	GEOCHIM COSMOCHIM ACTA	KAY, R; KAY, S	DSDP Leg 61	7.2417	165.032	-1	33.9		55.8	INAA	SEDIMENTARY	UNKNOWN	UNKNOWN	SILICICLASTIC						10.12					5.99			0.166				3.19		7.97		8.65	1.94	0.715		0.454					1.7
DSDP019-0183-027R-003/34-36		SEDDB	10.1016/0016-7037(88)90206-2	CRUSTAL RECYCLING AND THE ALEUTIAN ARC	GEOCHIM COSMOCHIM ACTA	KAY, R; KAY, S	DSDP Leg 19	52.5717	-161.206	-1	0		65.5	MC-ICP-MS	SEDIMENTARY	UNKNOWN	UNKNOWN	SILICICLASTIC
DSDP019-0183-027R-003/34-36		SEDDB	10.1016/0016-7037(88)90206-2	CRUSTAL RECYCLING AND THE ALEUTIAN ARC	GEOCHIM COSMOCHIM ACTA	KAY, R; KAY, S	DSDP Leg 19	52.5717	-161.206	-1	0		65.5	FL-ES	SEDIMENTARY	UNKNOWN	UNKNOWN	SILICICLASTIC
DSDP019-0183-027R-003/34-36		SEDDB	10.1016/0016-7037(88)90206-2	CRUSTAL RECYCLING AND THE ALEUTIAN ARC	GEOCHIM COSMOCHIM ACTA	KAY, R; KAY, S	DSDP Leg 19	52.5717	-161.206	-1	0		65.5	INAA	SEDIMENTARY	UNKNOWN	UNKNOWN	SILICICLASTIC						5.18					2.92			0.111				18.1		37.7		16.1	3.71	0.94		0.716					1.55
DSDP019-0183-027R-003/34-36		SEDDB	10.1016/0016-7037(88)90206-2	CRUSTAL RECYCLING AND THE ALEUTIAN ARC	GEOCHIM COSMOCHIM ACTA	KAY, R; KAY, S	DSDP Leg 19	52.5717	-161.206	-1	0		65.5	ICPMS	SEDIMENTARY	UNKNOWN	UNKNOWN	SILICICLASTIC		0.665																18.31		36.95	4.52	17.6	3.66	0.97	3.4	0.535	3.04	0.578	1.54		1.4
DSDP019-0183-027R-003/34-36		SEDDB	10.1016/0016-7037(88)90206-2	CRUSTAL RECYCLING AND THE ALEUTIAN ARC	GEOCHIM COSMOCHIM ACTA	KAY, R; KAY, S	DSDP Leg 19	52.5717	-161.206	-1	0		65.5	ICP	SEDIMENTARY	UNKNOWN	UNKNOWN	SILICICLASTIC
DSDP019-0183-027R-003/34-36		SEDDB	10.1029/2005gc001202	LITHIUM ISOTOPIC COMPOSITION OF MARINE SEDIMENTS	GEOCHEM GEOPHYS GEOSYST	CHAN, L; LEEMAN, W; PLANK, T	DSDP Leg 19	52.5717	-161.206	-1	0		65.5	MC-ICP-MS	SEDIMENTARY	UNKNOWN	UNKNOWN	SILICICLASTIC
DSDP019-0183-027R-003/34-36		SEDDB	10.1029/2005gc001202	LITHIUM ISOTOPIC COMPOSITION OF MARINE SEDIMENTS	GEOCHEM GEOPHYS GEOSYST	CHAN, L; LEEMAN, W; PLANK, T	DSDP Leg 19	52.5717	-161.206	-1	0		65.5	FL-ES	SEDIMENTARY	UNKNOWN	UNKNOWN	SILICICLASTIC
DSDP019-0183-027R-003/34-36		SEDDB	10.1029/2005gc001202	LITHIUM ISOTOPIC COMPOSITION OF MARINE SEDIMENTS	GEOCHEM GEOPHYS GEOSYST	CHAN, L; LEEMAN, W; PLANK, T	DSDP Leg 19	52.5717	-161.206	-1	0		65.5	INAA	SEDIMENTARY	UNKNOWN	UNKNOWN	SILICICLASTIC						5.18					2.92			0.111				18.1		37.7		16.1	3.71	0.94		0.716					1.55
DSDP019-0183-027R-003/34-36		SEDDB	10.1029/2005gc001202	LITHIUM ISOTOPIC COMPOSITION OF MARINE SEDIMENTS	GEOCHEM GEOPHYS GEOSYST	CHAN, L; LEEMAN, W; PLANK, T	DSDP Leg 19	52.5717	-161.206	-1	0		65.5	ICPMS	SEDIMENTARY	UNKNOWN	UNKNOWN	SILICICLASTIC		0.665																18.31		36.95	4.52	17.6	3.66	0.97	3.4	0.535	3.04	0.578	1.54		1.4
DSDP019-0183-027R-003/34-36		SEDDB	10.1029/2005gc001202	LITHIUM ISOTOPIC COMPOSITION OF MARINE SEDIMENTS	GEOCHEM GEOPHYS GEOSYST	CHAN, L; LEEMAN, W; PLANK, T	DSDP Leg 19	52.5717	-161.206	-1	0		65.5	ICP	SEDIMENTARY	UNKNOWN	UNKNOWN	SILICICLASTIC
DSDP062-0464-006R-006/104-106		SEDDB	10.1016/0012-821X(91)90232-7	Th, Pb, Sr ISOTOPES VARIATIONS IN YOUNG ISLAND ARC VOLCANICS AND OCEANIC SEDIMENTS	EARTH PLANET SCI LETT	MCDERMOTT, F; HAWKESWORTH, C	DSDP Leg 62	39.8607	173.889	-1	0		65.5	TIMS-ID	SEDIMENTARY	UNKNOWN	UNKNOWN	SILICICLASTIC
DSDP062-0464-006R-006/104-106		SEDDB	10.1016/0012-821X(91)90232-7	Th, Pb, Sr ISOTOPES VARIATIONS IN YOUNG ISLAND ARC VOLCANICS AND OCEANIC SEDIMENTS	EARTH PLANET SCI LETT	MCDERMOTT, F; HAWKESWORTH, C	DSDP Leg 62	39.8607	173.889	-1	0		65.5	INAA	SEDIMENTARY	UNKNOWN	UNKNOWN	SILICICLASTIC						11.1					3.25			0.184				43.6		65.7		46.9	12.4	3.52		2.03					5.31
DSDP062-0464-006R-006/104-106		SEDDB	10.1016/0012-821X(91)90232-7	Th, Pb, Sr ISOTOPES VARIATIONS IN YOUNG ISLAND ARC VOLCANICS AND OCEANIC SEDIMENTS	EARTH PLANET SCI LETT	MCDERMOTT, F; HAWKESWORTH, C	DSDP Leg 62	39.8607	173.889	-1	0		65.5	TIMS	SEDIMENTARY	UNKNOWN	UNKNOWN	SILICICLASTIC
DSDP062-0464-006R-006/104-106		SEDDB	10.1016/0016-7037(88)90206-2	CRUSTAL RECYCLING AND THE ALEUTIAN ARC	GEOCHIM COSMOCHIM ACTA	KAY, R; KAY, S	DSDP Leg 62	39.8607	173.889	-1	0		65.5	TIMS-ID	SEDIMENTARY	UNKNOWN	UNKNOWN	SILICICLASTIC
DSDP062-0464-006R-006/104-106		SEDDB	10.1016/0016-7037(88)90206-2	CRUSTAL RECYCLING AND THE ALEUTIAN ARC	GEOCHIM COSMOCHIM ACTA	KAY, R; KAY, S	DSDP Leg 62	39.8607	173.889	-1	0		65.5	INAA	SEDIMENTARY	UNKNOWN	UNKNOWN	SILICICLASTIC						11.1					3.25			0.184				43.6		65.7		46.9	12.4	3.52		2.03					5.31
DSDP062-0464-006R-006/104-106		SEDDB	10.1016/0016-7037(88)90206-2	CRUSTAL RECYCLING AND THE ALEUTIAN ARC	GEOCHIM COSMOCHIM ACTA	KAY, R; KAY, S	DSDP Leg 62	39.8607	173.889	-1	0		65.5	TIMS	SEDIMENTARY	UNKNOWN	UNKNOWN	SILICICLASTIC
DSDP017-0170-007R-003/53-55		SEDDB	10.1016/0012-821X(91)90232-7	Th, Pb, Sr ISOTOPES VARIATIONS IN YOUNG ISLAND ARC VOLCANICS AND OCEANIC SEDIMENTS	EARTH PLANET SCI LETT	MCDERMOTT, F; HAWKESWORTH, C	DSDP Leg 17	11.8	177.617	-1	65.5		145.5	TIMS-ID	SEDIMENTARY	UNKNOWN	UNKNOWN	SILICICLASTIC
DSDP017-0170-007R-003/53-55		SEDDB	10.1016/0012-821X(91)90232-7	Th, Pb, Sr ISOTOPES VARIATIONS IN YOUNG ISLAND ARC VOLCANICS AND OCEANIC SEDIMENTS	EARTH PLANET SCI LETT	MCDERMOTT, F; HAWKESWORTH, C	DSDP Leg 17	11.8	177.617	-1	65.5		145.5	INAA	SEDIMENTARY	UNKNOWN	UNKNOWN	SILICICLASTIC						5.86					2.39			0.097				52.6		74.3		50	14.1	2.53		1.83					4.48
DSDP017-0170-007R-003/53-55		SEDDB	10.1016/0012-821X(91)90232-7	Th, Pb, Sr ISOTOPES VARIATIONS IN YOUNG ISLAND ARC VOLCANICS AND OCEANIC SEDIMENTS	EARTH PLANET SCI LETT	MCDERMOTT, F; HAWKESWORTH, C	DSDP Leg 17	11.8	177.617	-1	65.5		145.5	TIMS	SEDIMENTARY	UNKNOWN	UNKNOWN	SILICICLASTIC
DSDP017-0170-007R-003/53-55		SEDDB	10.1016/0016-7037(88)90206-2	CRUSTAL RECYCLING AND THE ALEUTIAN ARC	GEOCHIM COSMOCHIM ACTA	KAY, R; KAY, S	DSDP Leg 17	11.8	177.617	-1	65.5		145.5	TIMS-ID	SEDIMENTARY	UNKNOWN	UNKNOWN	SILICICLASTIC
DSDP017-0170-007R-003/53-55		SEDDB	10.1016/0016-7037(88)90206-2	CRUSTAL RECYCLING AND THE ALEUTIAN ARC	GEOCHIM COSMOCHIM ACTA	KAY, R; KAY, S	DSDP Leg 17	11.8	177.617	-1	65.5		145.5	INAA	SEDIMENTARY	UNKNOWN	UNKNOWN	SILICICLASTIC						5.86					2.39			0.097				52.6		74.3		50	14.1	2.53		1.83					4.48
DSDP017-0170-007R-003/53-55		SEDDB	10.1016/0016-7037(88)90206-2	CRUSTAL RECYCLING AND THE ALEUTIAN ARC	GEOCHIM COSMOCHIM ACTA	KAY, R; KAY, S	DSDP Leg 17	11.8	177.617	-1	65.5		145.5	TIMS	SEDIMENTARY	UNKNOWN	UNKNOWN	SILICICLASTIC
DSDP032-0307-001R-004/106-108		SEDDB	10.1016/0012-821X(91)90232-7	Th, Pb, Sr ISOTOPES VARIATIONS IN YOUNG ISLAND ARC VOLCANICS AND OCEANIC SEDIMENTS	EARTH PLANET SCI LETT	MCDERMOTT, F; HAWKESWORTH, C	DSDP Leg 32	28.5877	161.005	-1	0.0118		1.806	TIMS-ID	SEDIMENTARY	UNKNOWN	UNKNOWN	SILICICLASTIC
DSDP032-0307-001R-004/106-108		SEDDB	10.1016/0012-821X(91)90232-7	Th, Pb, Sr ISOTOPES VARIATIONS IN YOUNG ISLAND ARC VOLCANICS AND OCEANIC SEDIMENTS	EARTH PLANET SCI LETT	MCDERMOTT, F; HAWKESWORTH, C	DSDP Leg 32	28.5877	161.005	-1	0.0118		1.806	INAA	SEDIMENTARY	UNKNOWN	UNKNOWN	SILICICLASTIC						7.06					3.72			0.12				55.9		116		51	12.1	2.65		2.06					6.5
DSDP032-0307-001R-004/106-108		SEDDB	10.1016/0012-821X(91)90232-7	Th, Pb, Sr ISOTOPES VARIATIONS IN YOUNG ISLAND ARC VOLCANICS AND OCEANIC SEDIMENTS	EARTH PLANET SCI LETT	MCDERMOTT, F; HAWKESWORTH, C	DSDP Leg 32	28.5877	161.005	-1	0.0118		1.806	TIMS	SEDIMENTARY	UNKNOWN	UNKNOWN	SILICICLASTIC
DSDP032-0307-001R-004/106-108		SEDDB	10.1016/0016-7037(88)90206-2	CRUSTAL RECYCLING AND THE ALEUTIAN ARC	GEOCHIM COSMOCHIM ACTA	KAY, R; KAY, S	DSDP Leg 32	28.5877	161.005	-1	0.0118		1.806	TIMS-ID	SEDIMENTARY	UNKNOWN	UNKNOWN	SILICICLASTIC
DSDP032-0307-001R-004/106-108		SEDDB	10.1016/0016-7037(88)90206-2	CRUSTAL RECYCLING AND THE ALEUTIAN ARC	GEOCHIM COSMOCHIM ACTA	KAY, R; KAY, S	DSDP Leg 32	28.5877	161.005	-1	0.0118		1.806	INAA	SEDIMENTARY	UNKNOWN	UNKNOWN	SILICICLASTIC						7.06					3.72			0.12				55.9		116		51	12.1	2.65		2.06					6.5
DSDP032-0307-001R-004/106-108		SEDDB	10.1016/0016-7037(88)90206-2	CRUSTAL RECYCLING AND THE ALEUTIAN ARC	GEOCHIM COSMOCHIM ACTA	KAY, R; KAY, S	DSDP Leg 32	28.5877	161.005	-1	0.0118		1.806	TIMS	SEDIMENTARY	UNKNOWN	UNKNOWN	SILICICLASTIC
DSDP019-0183-027R-003/115-117		SEDDB	10.1016/0016-7037(88)90206-2	CRUSTAL RECYCLING AND THE ALEUTIAN ARC	GEOCHIM COSMOCHIM ACTA	KAY, R; KAY, S	DSDP Leg 19	52.5717	-161.206	-1	0		65.5	IGN	SEDIMENTARY	UNKNOWN	UNKNOWN	SILICICLASTIC															3.86
DSDP019-0183-027R-003/115-117		SEDDB	10.1016/0016-7037(88)90206-2	CRUSTAL RECYCLING AND THE ALEUTIAN ARC	GEOCHIM COSMOCHIM ACTA	KAY, R; KAY, S	DSDP Leg 19	52.5717	-161.206	-1	0		65.5	DCP	SEDIMENTARY	UNKNOWN	UNKNOWN	SILICICLASTIC	64.12	0.726	15.84				5.23	2.57	1.43		3.2	2.8	0.149	0.071
DSDP019-0183-027R-003/115-117		SEDDB	10.1016/0016-7037(88)90206-2	CRUSTAL RECYCLING AND THE ALEUTIAN ARC	GEOCHIM COSMOCHIM ACTA	KAY, R; KAY, S	DSDP Leg 19	52.5717	-161.206	-1	0		65.5	INAA	SEDIMENTARY	UNKNOWN	UNKNOWN	SILICICLASTIC						4.87					2.96			0.078				18.4		36.8		19.1	3.85	0.092		0.496					1.62
DSDP019-0183-027R-003/115-117		SEDDB	10.1016/S0009-2541(97)00150-2	THE CHEMICAL COMPOSITION OF SUBDUCTING SEDIMENT AND ITS CONSEQUENCES FOR THE CRUST AND MANTLE	CHEMICAL GEOLOGY	PLANK, T; LANGMUIR, C	DSDP Leg 19	52.5717	-161.206	-1	0		65.5	IGN	SEDIMENTARY	UNKNOWN	UNKNOWN	SILICICLASTIC															3.86
DSDP019-0183-027R-003/115-117		SEDDB	10.1016/S0009-2541(97)00150-2	THE CHEMICAL COMPOSITION OF SUBDUCTING SEDIMENT AND ITS CONSEQUENCES FOR THE CRUST AND MANTLE	CHEMICAL GEOLOGY	PLANK, T; LANGMUIR, C	DSDP Leg 19	52.5717	-161.206	-1	0		65.5	DCP	SEDIMENTARY	UNKNOWN	UNKNOWN	SILICICLASTIC	64.12	0.726	15.84				5.23	2.57	1.43		3.2	2.8	0.149	0.071
DSDP019-0183-027R-003/115-117		SEDDB	10.1016/S0009-2541(97)00150-2	THE CHEMICAL COMPOSITION OF SUBDUCTING SEDIMENT AND ITS CONSEQUENCES FOR THE CRUST AND MANTLE	CHEMICAL GEOLOGY	PLANK, T; LANGMUIR, C	DSDP Leg 19	52.5717	-161.206	-1	0		65.5	INAA	SEDIMENTARY	UNKNOWN	UNKNOWN	SILICICLASTIC						4.87					2.96			0.078				18.4		36.8		19.1	3.85	0.092		0.496					1.62
DSDP019-0183-038R-001/106-108		SEDDB	10.1016/0016-7037(88)90206-2	CRUSTAL RECYCLING AND THE ALEUTIAN ARC	GEOCHIM COSMOCHIM ACTA	KAY, R; KAY, S	DSDP Leg 19	52.5717	-161.206	-1	33.9		55.8	IGN	SEDIMENTARY	UNKNOWN	UNKNOWN	SILICICLASTIC															5.93
DSDP019-0183-038R-001/106-108		SEDDB	10.1016/0016-7037(88)90206-2	CRUSTAL RECYCLING AND THE ALEUTIAN ARC	GEOCHIM COSMOCHIM ACTA	KAY, R; KAY, S	DSDP Leg 19	52.5717	-161.206	-1	33.9		55.8	DCP	SEDIMENTARY	UNKNOWN	UNKNOWN	SILICICLASTIC	57.9	0.86	17.7				7.12	3.71	0.98		2.59	2.94	0.161	0.095
DSDP019-0183-038R-001/106-108		SEDDB	10.1016/0016-7037(88)90206-2	CRUSTAL RECYCLING AND THE ALEUTIAN ARC	GEOCHIM COSMOCHIM ACTA	KAY, R; KAY, S	DSDP Leg 19	52.5717	-161.206	-1	33.9		55.8	INAA	SEDIMENTARY	UNKNOWN	UNKNOWN	SILICICLASTIC						7.02					2.52			0.104				22.6		48.9		20.6	5.68	0.24		0.909					2.77
DSDP019-0183-038R-001/106-108		SEDDB	10.1016/S0009-2541(97)00150-2	THE CHEMICAL COMPOSITION OF SUBDUCTING SEDIMENT AND ITS CONSEQUENCES FOR THE CRUST AND MANTLE	CHEMICAL GEOLOGY	PLANK, T; LANGMUIR, C	DSDP Leg 19	52.5717	-161.206	-1	33.9		55.8	IGN	SEDIMENTARY	UNKNOWN	UNKNOWN	SILICICLASTIC															5.93
DSDP019-0183-038R-001/106-108		SEDDB	10.1016/S0009-2541(97)00150-2	THE CHEMICAL COMPOSITION OF SUBDUCTING SEDIMENT AND ITS CONSEQUENCES FOR THE CRUST AND MANTLE	CHEMICAL GEOLOGY	PLANK, T; LANGMUIR, C	DSDP Leg 19	52.5717	-161.206	-1	33.9		55.8	DCP	SEDIMENTARY	UNKNOWN	UNKNOWN	SILICICLASTIC	57.9	0.86	17.7				7.12	3.71	0.98		2.59	2.94	0.161	0.095
DSDP019-0183-038R-001/106-108		SEDDB	10.1016/S0009-2541(97)00150-2	THE CHEMICAL COMPOSITION OF SUBDUCTING SEDIMENT AND ITS CONSEQUENCES FOR THE CRUST AND MANTLE	CHEMICAL GEOLOGY	PLANK, T; LANGMUIR, C	DSDP Leg 19	52.5717	-161.206	-1	33.9		55.8	INAA	SEDIMENTARY	UNKNOWN	UNKNOWN	SILICICLASTIC						7.02					2.52			0.104				22.6		48.9		20.6	5.68	0.24		0.909					2.77
DSDP019-0183-027R-003/64-66		SEDDB	10.1016/0016-7037(88)90206-2	CRUSTAL RECYCLING AND THE ALEUTIAN ARC	GEOCHIM COSMOCHIM ACTA	KAY, R; KAY, S	DSDP Leg 19	52.5717	-161.206	-1	0		65.5	INAA	SEDIMENTARY	UNKNOWN	UNKNOWN	SILICICLASTIC						7.57					2.62			0.121				21.4		45.4		22.4	4.71	1.21		0.719					2.22
DSDP019-0183-027R-003/99-101		SEDDB	10.1016/0016-7037(88)90206-2	CRUSTAL RECYCLING AND THE ALEUTIAN ARC	GEOCHIM COSMOCHIM ACTA	KAY, R; KAY, S	DSDP Leg 19	52.5717	-161.206	-1	0		65.5	INAA	SEDIMENTARY	UNKNOWN	UNKNOWN	SILICICLASTIC						6.59					2.66			0.109				22.1		57.2		21.7	4.8	1.2		0.767					2.23
DSDP019-0183-027R-003/99-101		SEDDB	10.1016/0016-7037(88)90206-2	CRUSTAL RECYCLING AND THE ALEUTIAN ARC	GEOCHIM COSMOCHIM ACTA	KAY, R; KAY, S	DSDP Leg 19	52.5717	-161.206	-1	0		65.5	ICPMS	SEDIMENTARY	UNKNOWN	UNKNOWN	SILICICLASTIC		0.83																21.52		45.3	5.51	21.8	4.65	1.18	4.36	0.692	3.87	0.77	2.01		1.91
DSDP019-0183-027R-003/99-101		SEDDB	10.1029/2005gc001202	LITHIUM ISOTOPIC COMPOSITION OF MARINE SEDIMENTS	GEOCHEM GEOPHYS GEOSYST	CHAN, L; LEEMAN, W; PLANK, T	DSDP Leg 19	52.5717	-161.206	-1	0		65.5	INAA	SEDIMENTARY	UNKNOWN	UNKNOWN	SILICICLASTIC						6.59					2.66			0.109				22.1		57.2		21.7	4.8	1.2		0.767					2.23
DSDP019-0183-027R-003/99-101		SEDDB	10.1029/2005gc001202	LITHIUM ISOTOPIC COMPOSITION OF MARINE SEDIMENTS	GEOCHEM GEOPHYS GEOSYST	CHAN, L; LEEMAN, W; PLANK, T	DSDP Leg 19	52.5717	-161.206	-1	0		65.5	ICPMS	SEDIMENTARY	UNKNOWN	UNKNOWN	SILICICLASTIC		0.83																21.52		45.3	5.51	21.8	4.65	1.18	4.36	0.692	3.87	0.77	2.01		1.91
DSDP019-0183-029R-001/124-126		SEDDB	10.1016/S0009-2541(97)00150-2	THE CHEMICAL COMPOSITION OF SUBDUCTING SEDIMENT AND ITS CONSEQUENCES FOR THE CRUST AND MANTLE	CHEMICAL GEOLOGY	PLANK, T; LANGMUIR, C	DSDP Leg 19	52.5717	-161.206	-1	0		65.5	IGN	SEDIMENTARY	UNKNOWN	UNKNOWN	SILICICLASTIC															2.59
DSDP019-0183-029R-001/124-126		SEDDB	10.1016/S0009-2541(97)00150-2	THE CHEMICAL COMPOSITION OF SUBDUCTING SEDIMENT AND ITS CONSEQUENCES FOR THE CRUST AND MANTLE	CHEMICAL GEOLOGY	PLANK, T; LANGMUIR, C	DSDP Leg 19	52.5717	-161.206	-1	0		65.5	DCP	SEDIMENTARY	UNKNOWN	UNKNOWN	SILICICLASTIC	69.16	0.615	13.7				4.13	2.04	2.03		3.32	2.24	0.122	0.066
DSDP019-0183-029R-001/124-126		SEDDB	10.1016/S0009-2541(97)00150-2	THE CHEMICAL COMPOSITION OF SUBDUCTING SEDIMENT AND ITS CONSEQUENCES FOR THE CRUST AND MANTLE	CHEMICAL GEOLOGY	PLANK, T; LANGMUIR, C	DSDP Leg 19	52.5717	-161.206	-1	0		65.5	INAA	SEDIMENTARY	UNKNOWN	UNKNOWN	SILICICLASTIC						5.44					3.11			0.064				16.5		43.1		13	2.68	1.06		0.603					2
DSDP019-0183-029R-001/124-126		SEDDB	10.1016/0016-7037(88)90206-2	CRUSTAL RECYCLING AND THE ALEUTIAN ARC	GEOCHIM COSMOCHIM ACTA	KAY, R; KAY, S	DSDP Leg 19	52.5717	-161.206	-1	0		65.5	IGN	SEDIMENTARY	UNKNOWN	UNKNOWN	SILICICLASTIC															2.59
DSDP019-0183-029R-001/124-126		SEDDB	10.1016/0016-7037(88)90206-2	CRUSTAL RECYCLING AND THE ALEUTIAN ARC	GEOCHIM COSMOCHIM ACTA	KAY, R; KAY, S	DSDP Leg 19	52.5717	-161.206	-1	0		65.5	DCP	SEDIMENTARY	UNKNOWN	UNKNOWN	SILICICLASTIC	69.16	0.615	13.7				4.13	2.04	2.03		3.32	2.24	0.122	0.066
DSDP019-0183-029R-001/124-126		SEDDB	10.1016/0016-7037(88)90206-2	CRUSTAL RECYCLING AND THE ALEUTIAN ARC	GEOCHIM COSMOCHIM ACTA	KAY, R; KAY, S	DSDP Leg 19	52.5717	-161.206	-1	0		65.5	INAA	SEDIMENTARY	UNKNOWN	UNKNOWN	SILICICLASTIC						5.44					3.11			0.064				16.5		43.1		13	2.68	1.06		0.603					2
DSDP019-0183-037R-001/118-120		SEDDB	10.1016/0016-7037(88)90206-2	CRUSTAL RECYCLING AND THE ALEUTIAN ARC	GEOCHIM COSMOCHIM ACTA	KAY, R; KAY, S	DSDP Leg 19	52.5717	-161.206	-1	33.9		55.8	IGN	SEDIMENTARY	UNKNOWN	UNKNOWN	SILICICLASTIC															9.34
DSDP019-0183-037R-001/118-120		SEDDB	10.1016/0016-7037(88)90206-2	CRUSTAL RECYCLING AND THE ALEUTIAN ARC	GEOCHIM COSMOCHIM ACTA	KAY, R; KAY, S	DSDP Leg 19	52.5717	-161.206	-1	33.9		55.8	DCP	SEDIMENTARY	UNKNOWN	UNKNOWN	SILICICLASTIC	58.04	0.79	15.11				6.41	3.02	1.56		3.25	2.25	0.152	0.072
DSDP019-0183-037R-001/118-120		SEDDB	10.1016/0016-7037(88)90206-2	CRUSTAL RECYCLING AND THE ALEUTIAN ARC	GEOCHIM COSMOCHIM ACTA	KAY, R; KAY, S	DSDP Leg 19	52.5717	-161.206	-1	33.9		55.8	INAA	SEDIMENTARY	UNKNOWN	UNKNOWN	SILICICLASTIC						6.33					3.23			0.098				19.7		40.7		18.8	4.14	1.03		0.595					2.01
DSDP019-0183-037R-001/118-120		SEDDB	10.1016/S0009-2541(97)00150-2	THE CHEMICAL COMPOSITION OF SUBDUCTING SEDIMENT AND ITS CONSEQUENCES FOR THE CRUST AND MANTLE	CHEMICAL GEOLOGY	PLANK, T; LANGMUIR, C	DSDP Leg 19	52.5717	-161.206	-1	33.9		55.8	IGN	SEDIMENTARY	UNKNOWN	UNKNOWN	SILICICLASTIC															9.34
DSDP019-0183-037R-001/118-120		SEDDB	10.1016/S0009-2541(97)00150-2	THE CHEMICAL COMPOSITION OF SUBDUCTING SEDIMENT AND ITS CONSEQUENCES FOR THE CRUST AND MANTLE	CHEMICAL GEOLOGY	PLANK, T; LANGMUIR, C	DSDP Leg 19	52.5717	-161.206	-1	33.9		55.8	DCP	SEDIMENTARY	UNKNOWN	UNKNOWN	SILICICLASTIC	58.04	0.79	15.11				6.41	3.02	1.56		3.25	2.25	0.152	0.072
DSDP019-0183-037R-001/118-120		SEDDB	10.1016/S0009-2541(97)00150-2	THE CHEMICAL COMPOSITION OF SUBDUCTING SEDIMENT AND ITS CONSEQUENCES FOR THE CRUST AND MANTLE	CHEMICAL GEOLOGY	PLANK, T; LANGMUIR, C	DSDP Leg 19	52.5717	-161.206	-1	33.9		55.8	INAA	SEDIMENTARY	UNKNOWN	UNKNOWN	SILICICLASTIC						6.33					3.23			0.098				19.7		40.7		18.8	4.14	1.03		0.595					2.01
DSDP019-0183-038R-002/25-27		SEDDB	10.1016/0016-7037(88)90206-2	CRUSTAL RECYCLING AND THE ALEUTIAN ARC	GEOCHIM COSMOCHIM ACTA	KAY, R; KAY, S	DSDP Leg 19	52.5717	-161.206	-1	33.9		55.8	INAA	SEDIMENTARY	UNKNOWN	UNKNOWN	SILICICLASTIC						7.11					2.48			0.117				21.3		47.7		22.8	5.69	1.28		0.869					2.6
DSDP019-0183-039R-001/3-6		SEDDB	10.1029/2005gc001202	LITHIUM ISOTOPIC COMPOSITION OF MARINE SEDIMENTS	GEOCHEM GEOPHYS GEOSYST	CHAN, L; LEEMAN, W; PLANK, T	DSDP Leg 19	52.5717	-161.206	-1	33.9		55.8	MC-ICP-MS	SEDIMENTARY	UNKNOWN	UNKNOWN	SILICICLASTIC
DSDP019-0183-039R-001/3-6		SEDDB	10.1029/2005gc001202	LITHIUM ISOTOPIC COMPOSITION OF MARINE SEDIMENTS	GEOCHEM GEOPHYS GEOSYST	CHAN, L; LEEMAN, W; PLANK, T	DSDP Leg 19	52.5717	-161.206	-1	33.9		55.8	FL-ES	SEDIMENTARY	UNKNOWN	UNKNOWN	SILICICLASTIC
DSDP019-0183-039R-001/3-6		SEDDB	10.1029/2005gc001202	LITHIUM ISOTOPIC COMPOSITION OF MARINE SEDIMENTS	GEOCHEM GEOPHYS GEOSYST	CHAN, L; LEEMAN, W; PLANK, T	DSDP Leg 19	52.5717	-161.206	-1	33.9		55.8	INAA	SEDIMENTARY	UNKNOWN	UNKNOWN	SILICICLASTIC						7.29					2.15			0.114				21.8		46.6		21.1	5.1	1.23		0.84					2.45
DSDP019-0183-039R-001/3-6		SEDDB	10.1029/2005gc001202	LITHIUM ISOTOPIC COMPOSITION OF MARINE SEDIMENTS	GEOCHEM GEOPHYS GEOSYST	CHAN, L; LEEMAN, W; PLANK, T	DSDP Leg 19	52.5717	-161.206	-1	33.9		55.8	ICPMS	SEDIMENTARY	UNKNOWN	UNKNOWN	SILICICLASTIC		0.862																21.88		46.39	5.63	22.1	4.79	1.22	4.67	0.742	4.31	0.884	2.35		2.24
DSDP019-0183-039R-001/3-6		SEDDB	10.1029/2005gc001202	LITHIUM ISOTOPIC COMPOSITION OF MARINE SEDIMENTS	GEOCHEM GEOPHYS GEOSYST	CHAN, L; LEEMAN, W; PLANK, T	DSDP Leg 19	52.5717	-161.206	-1	33.9		55.8	ICP	SEDIMENTARY	UNKNOWN	UNKNOWN	SILICICLASTIC
DSDP019-0183-039R-001/3-6		SEDDB	10.1016/0016-7037(88)90206-2	CRUSTAL RECYCLING AND THE ALEUTIAN ARC	GEOCHIM COSMOCHIM ACTA	KAY, R; KAY, S	DSDP Leg 19	52.5717	-161.206	-1	33.9		55.8	MC-ICP-MS	SEDIMENTARY	UNKNOWN	UNKNOWN	SILICICLASTIC
DSDP019-0183-039R-001/3-6		SEDDB	10.1016/0016-7037(88)90206-2	CRUSTAL RECYCLING AND THE ALEUTIAN ARC	GEOCHIM COSMOCHIM ACTA	KAY, R; KAY, S	DSDP Leg 19	52.5717	-161.206	-1	33.9		55.8	FL-ES	SEDIMENTARY	UNKNOWN	UNKNOWN	SILICICLASTIC
DSDP019-0183-039R-001/3-6		SEDDB	10.1016/0016-7037(88)90206-2	CRUSTAL RECYCLING AND THE ALEUTIAN ARC	GEOCHIM COSMOCHIM ACTA	KAY, R; KAY, S	DSDP Leg 19	52.5717	-161.206	-1	33.9		55.8	INAA	SEDIMENTARY	UNKNOWN	UNKNOWN	SILICICLASTIC						7.29					2.15			0.114				21.8		46.6		21.1	5.1	1.23		0.84					2.45
DSDP019-0183-039R-001/3-6		SEDDB	10.1016/0016-7037(88)90206-2	CRUSTAL RECYCLING AND THE ALEUTIAN ARC	GEOCHIM COSMOCHIM ACTA	KAY, R; KAY, S	DSDP Leg 19	52.5717	-161.206	-1	33.9		55.8	ICPMS	SEDIMENTARY	UNKNOWN	UNKNOWN	SILICICLASTIC		0.862																21.88		46.39	5.63	22.1	4.79	1.22	4.67	0.742	4.31	0.884	2.35		2.24
DSDP019-0183-039R-001/3-6		SEDDB	10.1016/0016-7037(88)90206-2	CRUSTAL RECYCLING AND THE ALEUTIAN ARC	GEOCHIM COSMOCHIM ACTA	KAY, R; KAY, S	DSDP Leg 19	52.5717	-161.206	-1	33.9		55.8	ICP	SEDIMENTARY	UNKNOWN	UNKNOWN	SILICICLASTIC
DSDP019-0183-022R-002/93-95		SEDDB	10.1029/2005gc001202	LITHIUM ISOTOPIC COMPOSITION OF MARINE SEDIMENTS	GEOCHEM GEOPHYS GEOSYST	CHAN, L; LEEMAN, W; PLANK, T	DSDP Leg 19	52.5717	-161.206	-1	0		65.5	INAA	SEDIMENTARY	UNKNOWN	UNKNOWN	SILICICLASTIC						6.9					2.72			0.117				20.9		42.7		23.7	4.88	1.17		0.723					2.39
DSDP019-0183-022R-002/93-95		SEDDB	10.1029/2005gc001202	LITHIUM ISOTOPIC COMPOSITION OF MARINE SEDIMENTS	GEOCHEM GEOPHYS GEOSYST	CHAN, L; LEEMAN, W; PLANK, T	DSDP Leg 19	52.5717	-161.206	-1	0		65.5	ICPMS	SEDIMENTARY	UNKNOWN	UNKNOWN	SILICICLASTIC		0.841																19.97		39.96	5.54	21.7	4.78	1.27	4.56	0.733	4.12	0.816	2.26		2.14
DSDP019-0183-022R-002/93-95		SEDDB	10.1016/0016-7037(88)90206-2	CRUSTAL RECYCLING AND THE ALEUTIAN ARC	GEOCHIM COSMOCHIM ACTA	KAY, R; KAY, S	DSDP Leg 19	52.5717	-161.206	-1	0		65.5	INAA	SEDIMENTARY	UNKNOWN	UNKNOWN	SILICICLASTIC						6.9					2.72			0.117				20.9		42.7		23.7	4.88	1.17		0.723					2.39
DSDP019-0183-022R-002/93-95		SEDDB	10.1016/0016-7037(88)90206-2	CRUSTAL RECYCLING AND THE ALEUTIAN ARC	GEOCHIM COSMOCHIM ACTA	KAY, R; KAY, S	DSDP Leg 19	52.5717	-161.206	-1	0		65.5	ICPMS	SEDIMENTARY	UNKNOWN	UNKNOWN	SILICICLASTIC		0.841																19.97		39.96	5.54	21.7	4.78	1.27	4.56	0.733	4.12	0.816	2.26		2.14
DSDP017-0164-017R-001/128-130		SEDDB	10.1016/0012-821X(91)90232-7	Th, Pb, Sr ISOTOPES VARIATIONS IN YOUNG ISLAND ARC VOLCANICS AND OCEANIC SEDIMENTS	EARTH PLANET SCI LETT	MCDERMOTT, F; HAWKESWORTH, C	DSDP Leg 17	13.2017	-161.517	-1	65.5		145.5	TIMS-ID	SEDIMENTARY	UNKNOWN	UNKNOWN	SILICICLASTIC
DSDP017-0164-017R-001/128-130		SEDDB	10.1016/0012-821X(91)90232-7	Th, Pb, Sr ISOTOPES VARIATIONS IN YOUNG ISLAND ARC VOLCANICS AND OCEANIC SEDIMENTS	EARTH PLANET SCI LETT	MCDERMOTT, F; HAWKESWORTH, C	DSDP Leg 17	13.2017	-161.517	-1	65.5		145.5	INAA	SEDIMENTARY	UNKNOWN	UNKNOWN	SILICICLASTIC						7.48					2.05			0.122				45.6		74.9		39.8	8.34	1.83		1.22					3.32
DSDP017-0164-017R-001/128-130		SEDDB	10.1016/0012-821X(91)90232-7	Th, Pb, Sr ISOTOPES VARIATIONS IN YOUNG ISLAND ARC VOLCANICS AND OCEANIC SEDIMENTS	EARTH PLANET SCI LETT	MCDERMOTT, F; HAWKESWORTH, C	DSDP Leg 17	13.2017	-161.517	-1	65.5		145.5	TIMS	SEDIMENTARY	UNKNOWN	UNKNOWN	SILICICLASTIC
DSDP017-0164-017R-001/128-130		SEDDB	10.1016/0016-7037(88)90206-2	CRUSTAL RECYCLING AND THE ALEUTIAN ARC	GEOCHIM COSMOCHIM ACTA	KAY, R; KAY, S	DSDP Leg 17	13.2017	-161.517	-1	65.5		145.5	TIMS-ID	SEDIMENTARY	UNKNOWN	UNKNOWN	SILICICLASTIC
DSDP017-0164-017R-001/128-130		SEDDB	10.1016/0016-7037(88)90206-2	CRUSTAL RECYCLING AND THE ALEUTIAN ARC	GEOCHIM COSMOCHIM ACTA	KAY, R; KAY, S	DSDP Leg 17	13.2017	-161.517	-1	65.5		145.5	INAA	SEDIMENTARY	UNKNOWN	UNKNOWN	SILICICLASTIC						7.48					2.05			0.122				45.6		74.9		39.8	8.34	1.83		1.22					3.32
DSDP017-0164-017R-001/128-130		SEDDB	10.1016/0016-7037(88)90206-2	CRUSTAL RECYCLING AND THE ALEUTIAN ARC	GEOCHIM COSMOCHIM ACTA	KAY, R; KAY, S	DSDP Leg 17	13.2017	-161.517	-1	65.5		145.5	TIMS	SEDIMENTARY	UNKNOWN	UNKNOWN	SILICICLASTIC
DSDP009-0076-001R-001/136-138		SEDDB	10.1016/0012-821X(91)90232-7	Th, Pb, Sr ISOTOPES VARIATIONS IN YOUNG ISLAND ARC VOLCANICS AND OCEANIC SEDIMENTS	EARTH PLANET SCI LETT	MCDERMOTT, F; HAWKESWORTH, C	DSDP Leg 9	-14.0983	-145.661	-1	1.806		5.332	TIMS-ID	SEDIMENTARY	UNKNOWN	UNKNOWN	SILICICLASTIC
DSDP009-0076-001R-001/136-138		SEDDB	10.1016/0012-821X(91)90232-7	Th, Pb, Sr ISOTOPES VARIATIONS IN YOUNG ISLAND ARC VOLCANICS AND OCEANIC SEDIMENTS	EARTH PLANET SCI LETT	MCDERMOTT, F; HAWKESWORTH, C	DSDP Leg 9	-14.0983	-145.661	-1	1.806		5.332	INAA	SEDIMENTARY	UNKNOWN	UNKNOWN	SILICICLASTIC						8.77					6.07			0.138				241		122		213	52.2	13.3		11.5					35.3
DSDP009-0076-001R-001/136-138		SEDDB	10.1016/0012-821X(91)90232-7	Th, Pb, Sr ISOTOPES VARIATIONS IN YOUNG ISLAND ARC VOLCANICS AND OCEANIC SEDIMENTS	EARTH PLANET SCI LETT	MCDERMOTT, F; HAWKESWORTH, C	DSDP Leg 9	-14.0983	-145.661	-1	1.806		5.332	TIMS	SEDIMENTARY	UNKNOWN	UNKNOWN	SILICICLASTIC
DSDP009-0076-001R-001/136-138		SEDDB	10.1016/0016-7037(88)90206-2	CRUSTAL RECYCLING AND THE ALEUTIAN ARC	GEOCHIM COSMOCHIM ACTA	KAY, R; KAY, S	DSDP Leg 9	-14.0983	-145.661	-1	1.806		5.332	TIMS-ID	SEDIMENTARY	UNKNOWN	UNKNOWN	SILICICLASTIC
DSDP009-0076-001R-001/136-138		SEDDB	10.1016/0016-7037(88)90206-2	CRUSTAL RECYCLING AND THE ALEUTIAN ARC	GEOCHIM COSMOCHIM ACTA	KAY, R; KAY, S	DSDP Leg 9	-14.0983	-145.661	-1	1.806		5.332	INAA	SEDIMENTARY	UNKNOWN	UNKNOWN	SILICICLASTIC						8.77					6.07			0.138				241		122		213	52.2	13.3		11.5					35.3
DSDP009-0076-001R-001/136-138		SEDDB	10.1016/0016-7037(88)90206-2	CRUSTAL RECYCLING AND THE ALEUTIAN ARC	GEOCHIM COSMOCHIM ACTA	KAY, R; KAY, S	DSDP Leg 9	-14.0983	-145.661	-1	1.806		5.332	TIMS	SEDIMENTARY	UNKNOWN	UNKNOWN	SILICICLASTIC
DSDP019-0183-026R-003/76-78		SEDDB	10.1016/0016-7037(88)90206-2	CRUSTAL RECYCLING AND THE ALEUTIAN ARC	GEOCHIM COSMOCHIM ACTA	KAY, R; KAY, S	DSDP Leg 19	52.5717	-161.206	-1	0		65.5	INAA	SEDIMENTARY	UNKNOWN	UNKNOWN	SILICICLASTIC						6.53					2.67			0.103				21.5		44.9		21.7	4.75	1.19		0.711					2.21
DSDP019-0183-027R-003/130-132		SEDDB	10.1016/0016-7037(88)90206-2	CRUSTAL RECYCLING AND THE ALEUTIAN ARC	GEOCHIM COSMOCHIM ACTA	KAY, R; KAY, S	DSDP Leg 19	52.5717	-161.206	-1	0		65.5	IGN	SEDIMENTARY	UNKNOWN	UNKNOWN	SILICICLASTIC															6.13
DSDP019-0183-027R-003/130-132		SEDDB	10.1016/0016-7037(88)90206-2	CRUSTAL RECYCLING AND THE ALEUTIAN ARC	GEOCHIM COSMOCHIM ACTA	KAY, R; KAY, S	DSDP Leg 19	52.5717	-161.206	-1	0		65.5	DCP	SEDIMENTARY	UNKNOWN	UNKNOWN	SILICICLASTIC	58.18	0.85	17.51				6.48	3.33	1.19		2.81	3.27	0.166	0.082
DSDP019-0183-027R-003/130-132		SEDDB	10.1016/0016-7037(88)90206-2	CRUSTAL RECYCLING AND THE ALEUTIAN ARC	GEOCHIM COSMOCHIM ACTA	KAY, R; KAY, S	DSDP Leg 19	52.5717	-161.206	-1	0		65.5	INAA	SEDIMENTARY	UNKNOWN	UNKNOWN	SILICICLASTIC						6.54					2.73			0.11				22.1		46.4		23	4.86	1.19		0.733					2.21
DSDP019-0183-027R-003/130-132		SEDDB	10.1016/S0009-2541(97)00150-2	THE CHEMICAL COMPOSITION OF SUBDUCTING SEDIMENT AND ITS CONSEQUENCES FOR THE CRUST AND MANTLE	CHEMICAL GEOLOGY	PLANK, T; LANGMUIR, C	DSDP Leg 19	52.5717	-161.206	-1	0		65.5	IGN	SEDIMENTARY	UNKNOWN	UNKNOWN	SILICICLASTIC															6.13
DSDP019-0183-027R-003/130-132		SEDDB	10.1016/S0009-2541(97)00150-2	THE CHEMICAL COMPOSITION OF SUBDUCTING SEDIMENT AND ITS CONSEQUENCES FOR THE CRUST AND MANTLE	CHEMICAL GEOLOGY	PLANK, T; LANGMUIR, C	DSDP Leg 19	52.5717	-161.206	-1	0		65.5	DCP	SEDIMENTARY	UNKNOWN	UNKNOWN	SILICICLASTIC	58.18	0.85	17.51				6.48	3.33	1.19		2.81	3.27	0.166	0.082
DSDP019-0183-027R-003/130-132		SEDDB	10.1016/S0009-2541(97)00150-2	THE CHEMICAL COMPOSITION OF SUBDUCTING SEDIMENT AND ITS CONSEQUENCES FOR THE CRUST AND MANTLE	CHEMICAL GEOLOGY	PLANK, T; LANGMUIR, C	DSDP Leg 19	52.5717	-161.206	-1	0		65.5	INAA	SEDIMENTARY	UNKNOWN	UNKNOWN	SILICICLASTIC						6.54					2.73			0.11				22.1		46.4		23	4.86	1.19		0.733					2.21
DSDP019-0183-036R-001/135-137		SEDDB	10.1016/S0009-2541(97)00150-2	THE CHEMICAL COMPOSITION OF SUBDUCTING SEDIMENT AND ITS CONSEQUENCES FOR THE CRUST AND MANTLE	CHEMICAL GEOLOGY	PLANK, T; LANGMUIR, C	DSDP Leg 19	52.5717	-161.206	-1	33.9		55.8	IGN	SEDIMENTARY	UNKNOWN	UNKNOWN	SILICICLASTIC															8.01
DSDP019-0183-036R-001/135-137		SEDDB	10.1016/S0009-2541(97)00150-2	THE CHEMICAL COMPOSITION OF SUBDUCTING SEDIMENT AND ITS CONSEQUENCES FOR THE CRUST AND MANTLE	CHEMICAL GEOLOGY	PLANK, T; LANGMUIR, C	DSDP Leg 19	52.5717	-161.206	-1	33.9		55.8	DCP	SEDIMENTARY	UNKNOWN	UNKNOWN	SILICICLASTIC	57.13	0.875	16.8				7.06	3.44	1.23		2.93	2.3	0.146	0.074
DSDP019-0183-036R-001/135-137		SEDDB	10.1016/S0009-2541(97)00150-2	THE CHEMICAL COMPOSITION OF SUBDUCTING SEDIMENT AND ITS CONSEQUENCES FOR THE CRUST AND MANTLE	CHEMICAL GEOLOGY	PLANK, T; LANGMUIR, C	DSDP Leg 19	52.5717	-161.206	-1	33.9		55.8	INAA	SEDIMENTARY	UNKNOWN	UNKNOWN	SILICICLASTIC						6.82					2.86			0.11				21.6		45.2		22.7	4.66	1.12		0.631					2.01
DSDP019-0183-036R-001/135-137		SEDDB	10.1016/0016-7037(88)90206-2	CRUSTAL RECYCLING AND THE ALEUTIAN ARC	GEOCHIM COSMOCHIM ACTA	KAY, R; KAY, S	DSDP Leg 19	52.5717	-161.206	-1	33.9		55.8	IGN	SEDIMENTARY	UNKNOWN	UNKNOWN	SILICICLASTIC															8.01
DSDP019-0183-036R-001/135-137		SEDDB	10.1016/0016-7037(88)90206-2	CRUSTAL RECYCLING AND THE ALEUTIAN ARC	GEOCHIM COSMOCHIM ACTA	KAY, R; KAY, S	DSDP Leg 19	52.5717	-161.206	-1	33.9		55.8	DCP	SEDIMENTARY	UNKNOWN	UNKNOWN	SILICICLASTIC	57.13	0.875	16.8				7.06	3.44	1.23		2.93	2.3	0.146	0.074
DSDP019-0183-036R-001/135-137		SEDDB	10.1016/0016-7037(88)90206-2	CRUSTAL RECYCLING AND THE ALEUTIAN ARC	GEOCHIM COSMOCHIM ACTA	KAY, R; KAY, S	DSDP Leg 19	52.5717	-161.206	-1	33.9		55.8	INAA	SEDIMENTARY	UNKNOWN	UNKNOWN	SILICICLASTIC						6.82					2.86			0.11				21.6		45.2		22.7	4.66	1.12		0.631					2.01
DSDP006-0059-002R-005-001/124-126		SEDDB	10.1016/0012-821X(91)90232-7	Th, Pb, Sr ISOTOPES VARIATIONS IN YOUNG ISLAND ARC VOLCANICS AND OCEANIC SEDIMENTS	EARTH PLANET SCI LETT	MCDERMOTT, F; HAWKESWORTH, C	DSDP Leg 6	11.78	147.582	-1	5.332		23.03	TIMS-ID	SEDIMENTARY	UNKNOWN	UNKNOWN	SILICICLASTIC
DSDP006-0059-002R-005-001/124-126		SEDDB	10.1016/0012-821X(91)90232-7	Th, Pb, Sr ISOTOPES VARIATIONS IN YOUNG ISLAND ARC VOLCANICS AND OCEANIC SEDIMENTS	EARTH PLANET SCI LETT	MCDERMOTT, F; HAWKESWORTH, C	DSDP Leg 6	11.78	147.582	-1	5.332		23.03	INAA	SEDIMENTARY	UNKNOWN	UNKNOWN	SILICICLASTIC						4.91					6.65			0.079				215		119		205	50.6	12.3		8.96					27.6
DSDP006-0059-002R-005-001/124-126		SEDDB	10.1016/0012-821X(91)90232-7	Th, Pb, Sr ISOTOPES VARIATIONS IN YOUNG ISLAND ARC VOLCANICS AND OCEANIC SEDIMENTS	EARTH PLANET SCI LETT	MCDERMOTT, F; HAWKESWORTH, C	DSDP Leg 6	11.78	147.582	-1	5.332		23.03	TIMS	SEDIMENTARY	UNKNOWN	UNKNOWN	SILICICLASTIC
DSDP006-0059-002R-005-001/124-126		SEDDB	10.1016/0016-7037(88)90206-2	CRUSTAL RECYCLING AND THE ALEUTIAN ARC	GEOCHIM COSMOCHIM ACTA	KAY, R; KAY, S	DSDP Leg 6	11.78	147.582	-1	5.332		23.03	TIMS-ID	SEDIMENTARY	UNKNOWN	UNKNOWN	SILICICLASTIC
DSDP006-0059-002R-005-001/124-126		SEDDB	10.1016/0016-7037(88)90206-2	CRUSTAL RECYCLING AND THE ALEUTIAN ARC	GEOCHIM COSMOCHIM ACTA	KAY, R; KAY, S	DSDP Leg 6	11.78	147.582	-1	5.332		23.03	INAA	SEDIMENTARY	UNKNOWN	UNKNOWN	SILICICLASTIC						4.91					6.65			0.079				215		119		205	50.6	12.3		8.96					27.6
DSDP006-0059-002R-005-001/124-126		SEDDB	10.1016/0016-7037(88)90206-2	CRUSTAL RECYCLING AND THE ALEUTIAN ARC	GEOCHIM COSMOCHIM ACTA	KAY, R; KAY, S	DSDP Leg 6	11.78	147.582	-1	5.332		23.03	TIMS	SEDIMENTARY	UNKNOWN	UNKNOWN	SILICICLASTIC
DSDP032-0303-004R-004/75-77		SEDDB	10.1016/0012-821X(91)90232-7	Th, Pb, Sr ISOTOPES VARIATIONS IN YOUNG ISLAND ARC VOLCANICS AND OCEANIC SEDIMENTS	EARTH PLANET SCI LETT	MCDERMOTT, F; HAWKESWORTH, C	DSDP Leg 32	40.8083	154.451	-1	5.332		23.03	TIMS-ID	SEDIMENTARY	UNKNOWN	UNKNOWN	SILICICLASTIC
DSDP032-0303-004R-004/75-77		SEDDB	10.1016/0012-821X(91)90232-7	Th, Pb, Sr ISOTOPES VARIATIONS IN YOUNG ISLAND ARC VOLCANICS AND OCEANIC SEDIMENTS	EARTH PLANET SCI LETT	MCDERMOTT, F; HAWKESWORTH, C	DSDP Leg 32	40.8083	154.451	-1	5.332		23.03	INAA	SEDIMENTARY	UNKNOWN	UNKNOWN	SILICICLASTIC						5.15					4.11			0.086				28.3		89.5		27.7	5.5	1.2		0.88					2.67
DSDP032-0303-004R-004/75-77		SEDDB	10.1016/0012-821X(91)90232-7	Th, Pb, Sr ISOTOPES VARIATIONS IN YOUNG ISLAND ARC VOLCANICS AND OCEANIC SEDIMENTS	EARTH PLANET SCI LETT	MCDERMOTT, F; HAWKESWORTH, C	DSDP Leg 32	40.8083	154.451	-1	5.332		23.03	TIMS	SEDIMENTARY	UNKNOWN	UNKNOWN	SILICICLASTIC
DSDP032-0303-004R-004/75-77		SEDDB	10.1016/0016-7037(88)90206-2	CRUSTAL RECYCLING AND THE ALEUTIAN ARC	GEOCHIM COSMOCHIM ACTA	KAY, R; KAY, S	DSDP Leg 32	40.8083	154.451	-1	5.332		23.03	TIMS-ID	SEDIMENTARY	UNKNOWN	UNKNOWN	SILICICLASTIC
DSDP032-0303-004R-004/75-77		SEDDB	10.1016/0016-7037(88)90206-2	CRUSTAL RECYCLING AND THE ALEUTIAN ARC	GEOCHIM COSMOCHIM ACTA	KAY, R; KAY, S	DSDP Leg 32	40.8083	154.451	-1	5.332		23.03	INAA	SEDIMENTARY	UNKNOWN	UNKNOWN	SILICICLASTIC						5.15					4.11			0.086				28.3		89.5		27.7	5.5	1.2		0.88					2.67
DSDP032-0303-004R-004/75-77		SEDDB	10.1016/0016-7037(88)90206-2	CRUSTAL RECYCLING AND THE ALEUTIAN ARC	GEOCHIM COSMOCHIM ACTA	KAY, R; KAY, S	DSDP Leg 32	40.8083	154.451	-1	5.332		23.03	TIMS	SEDIMENTARY	UNKNOWN	UNKNOWN	SILICICLASTIC
DSDP019-0183-038R-001/66-68		SEDDB	10.1016/0016-7037(88)90206-2	CRUSTAL RECYCLING AND THE ALEUTIAN ARC	GEOCHIM COSMOCHIM ACTA	KAY, R; KAY, S	DSDP Leg 19	52.5717	-161.206	-1	33.9		55.8	INAA	SEDIMENTARY	UNKNOWN	UNKNOWN	SILICICLASTIC						6.74					2.48			0.108				22.1		45.7		20.9	5.48	1.19		0.823					2.41
DSDP019-0183-038R-003/33-35		SEDDB	10.1016/0016-7037(88)90206-2	CRUSTAL RECYCLING AND THE ALEUTIAN ARC	GEOCHIM COSMOCHIM ACTA	KAY, R; KAY, S	DSDP Leg 19	52.5717	-161.206	-1	33.9		55.8	INAA	SEDIMENTARY	UNKNOWN	UNKNOWN	SILICICLASTIC						6.17					2.59			0.102				21.2		44.4		22.1	5.43	1.16		0.772					2.06
DSDP019-0183-039R-001/103-110		SEDDB	10.1016/0016-7037(88)90206-2	CRUSTAL RECYCLING AND THE ALEUTIAN ARC	GEOCHIM COSMOCHIM ACTA	KAY, R; KAY, S	DSDP Leg 19	52.5717	-161.206	-1	33.9		55.8	MC-ICP-MS	SEDIMENTARY	UNKNOWN	UNKNOWN	SILICICLASTIC
DSDP019-0183-039R-001/103-110		SEDDB	10.1016/0016-7037(88)90206-2	CRUSTAL RECYCLING AND THE ALEUTIAN ARC	GEOCHIM COSMOCHIM ACTA	KAY, R; KAY, S	DSDP Leg 19	52.5717	-161.206	-1	33.9		55.8	FL-ES	SEDIMENTARY	UNKNOWN	UNKNOWN	SILICICLASTIC
DSDP019-0183-039R-001/103-110		SEDDB	10.1016/0016-7037(88)90206-2	CRUSTAL RECYCLING AND THE ALEUTIAN ARC	GEOCHIM COSMOCHIM ACTA	KAY, R; KAY, S	DSDP Leg 19	52.5717	-161.206	-1	33.9		55.8	IGN	SEDIMENTARY	UNKNOWN	UNKNOWN	SILICICLASTIC															6.79
DSDP019-0183-039R-001/103-110		SEDDB	10.1016/0016-7037(88)90206-2	CRUSTAL RECYCLING AND THE ALEUTIAN ARC	GEOCHIM COSMOCHIM ACTA	KAY, R; KAY, S	DSDP Leg 19	52.5717	-161.206	-1	33.9		55.8	DCP	SEDIMENTARY	UNKNOWN	UNKNOWN	SILICICLASTIC	52.94	0.82	15.37				9.69	3.58	2.18		2.58	3.13	0.921	1.983
DSDP019-0183-039R-001/103-110		SEDDB	10.1016/0016-7037(88)90206-2	CRUSTAL RECYCLING AND THE ALEUTIAN ARC	GEOCHIM COSMOCHIM ACTA	KAY, R; KAY, S	DSDP Leg 19	52.5717	-161.206	-1	33.9		55.8	TIMS	SEDIMENTARY	UNKNOWN	UNKNOWN	SILICICLASTIC
DSDP019-0183-039R-001/103-110		SEDDB	10.1016/0016-7037(88)90206-2	CRUSTAL RECYCLING AND THE ALEUTIAN ARC	GEOCHIM COSMOCHIM ACTA	KAY, R; KAY, S	DSDP Leg 19	52.5717	-161.206	-1	33.9		55.8	TIMS-ID	SEDIMENTARY	UNKNOWN	UNKNOWN	SILICICLASTIC																						189	46
DSDP019-0183-039R-001/103-110		SEDDB	10.1016/0016-7037(88)90206-2	CRUSTAL RECYCLING AND THE ALEUTIAN ARC	GEOCHIM COSMOCHIM ACTA	KAY, R; KAY, S	DSDP Leg 19	52.5717	-161.206	-1	33.9		55.8	INAA	SEDIMENTARY	UNKNOWN	UNKNOWN	SILICICLASTIC						8.73					2.32			8.73				129.8		152		203	43.4	10.7		6.73					15.4
DSDP019-0183-039R-001/103-110		SEDDB	10.1016/0016-7037(88)90206-2	CRUSTAL RECYCLING AND THE ALEUTIAN ARC	GEOCHIM COSMOCHIM ACTA	KAY, R; KAY, S	DSDP Leg 19	52.5717	-161.206	-1	33.9		55.8	ICPMS	SEDIMENTARY	UNKNOWN	UNKNOWN	SILICICLASTIC		0.748																116.84		160.3	40.97	190.6	44.69	11.25	45.82	6.767	37.95	7.459	19.02		16.5
DSDP019-0183-039R-001/103-110		SEDDB	10.1016/0016-7037(88)90206-2	CRUSTAL RECYCLING AND THE ALEUTIAN ARC	GEOCHIM COSMOCHIM ACTA	KAY, R; KAY, S	DSDP Leg 19	52.5717	-161.206	-1	33.9		55.8	TIMS	SEDIMENTARY	UNKNOWN	UNKNOWN	SILICICLASTIC
DSDP019-0183-039R-001/103-110		SEDDB	10.1016/0016-7037(88)90206-2	CRUSTAL RECYCLING AND THE ALEUTIAN ARC	GEOCHIM COSMOCHIM ACTA	KAY, R; KAY, S	DSDP Leg 19	52.5717	-161.206	-1	33.9		55.8	ICP	SEDIMENTARY	UNKNOWN	UNKNOWN	SILICICLASTIC
DSDP019-0183-039R-001/103-110		SEDDB	10.1016/j.gca.2011.07.046	THE Hf-Nd ISOTOPIC COMPOSITION OF MARINE SEDIMENTS	GEOCHIM COSMOCHIM ACTA	VERVOORT, J; PLANK, T; PRYTULAK, J	DSDP Leg 19	52.5717	-161.206	-1	33.9		55.8	MC-ICP-MS	SEDIMENTARY	UNKNOWN	UNKNOWN	SILICICLASTIC
DSDP019-0183-039R-001/103-110		SEDDB	10.1016/j.gca.2011.07.046	THE Hf-Nd ISOTOPIC COMPOSITION OF MARINE SEDIMENTS	GEOCHIM COSMOCHIM ACTA	VERVOORT, J; PLANK, T; PRYTULAK, J	DSDP Leg 19	52.5717	-161.206	-1	33.9		55.8	FL-ES	SEDIMENTARY	UNKNOWN	UNKNOWN	SILICICLASTIC
DSDP019-0183-039R-001/103-110		SEDDB	10.1016/j.gca.2011.07.046	THE Hf-Nd ISOTOPIC COMPOSITION OF MARINE SEDIMENTS	GEOCHIM COSMOCHIM ACTA	VERVOORT, J; PLANK, T; PRYTULAK, J	DSDP Leg 19	52.5717	-161.206	-1	33.9		55.8	IGN	SEDIMENTARY	UNKNOWN	UNKNOWN	SILICICLASTIC															6.79
DSDP019-0183-039R-001/103-110		SEDDB	10.1016/j.gca.2011.07.046	THE Hf-Nd ISOTOPIC COMPOSITION OF MARINE SEDIMENTS	GEOCHIM COSMOCHIM ACTA	VERVOORT, J; PLANK, T; PRYTULAK, J	DSDP Leg 19	52.5717	-161.206	-1	33.9		55.8	DCP	SEDIMENTARY	UNKNOWN	UNKNOWN	SILICICLASTIC	52.94	0.82	15.37				9.69	3.58	2.18		2.58	3.13	0.921	1.983
DSDP019-0183-039R-001/103-110		SEDDB	10.1016/j.gca.2011.07.046	THE Hf-Nd ISOTOPIC COMPOSITION OF MARINE SEDIMENTS	GEOCHIM COSMOCHIM ACTA	VERVOORT, J; PLANK, T; PRYTULAK, J	DSDP Leg 19	52.5717	-161.206	-1	33.9		55.8	TIMS	SEDIMENTARY	UNKNOWN	UNKNOWN	SILICICLASTIC
DSDP019-0183-039R-001/103-110		SEDDB	10.1016/j.gca.2011.07.046	THE Hf-Nd ISOTOPIC COMPOSITION OF MARINE SEDIMENTS	GEOCHIM COSMOCHIM ACTA	VERVOORT, J; PLANK, T; PRYTULAK, J	DSDP Leg 19	52.5717	-161.206	-1	33.9		55.8	TIMS-ID	SEDIMENTARY	UNKNOWN	UNKNOWN	SILICICLASTIC																						189	46
DSDP019-0183-039R-001/103-110		SEDDB	10.1016/j.gca.2011.07.046	THE Hf-Nd ISOTOPIC COMPOSITION OF MARINE SEDIMENTS	GEOCHIM COSMOCHIM ACTA	VERVOORT, J; PLANK, T; PRYTULAK, J	DSDP Leg 19	52.5717	-161.206	-1	33.9		55.8	INAA	SEDIMENTARY	UNKNOWN	UNKNOWN	SILICICLASTIC						8.73					2.32			8.73				129.8		152		203	43.4	10.7		6.73					15.4
DSDP019-0183-039R-001/103-110		SEDDB	10.1016/j.gca.2011.07.046	THE Hf-Nd ISOTOPIC COMPOSITION OF MARINE SEDIMENTS	GEOCHIM COSMOCHIM ACTA	VERVOORT, J; PLANK, T; PRYTULAK, J	DSDP Leg 19	52.5717	-161.206	-1	33.9		55.8	ICPMS	SEDIMENTARY	UNKNOWN	UNKNOWN	SILICICLASTIC		0.748																116.84		160.3	40.97	190.6	44.69	11.25	45.82	6.767	37.95	7.459	19.02		16.5
DSDP019-0183-039R-001/103-110		SEDDB	10.1016/j.gca.2011.07.046	THE Hf-Nd ISOTOPIC COMPOSITION OF MARINE SEDIMENTS	GEOCHIM COSMOCHIM ACTA	VERVOORT, J; PLANK, T; PRYTULAK, J	DSDP Leg 19	52.5717	-161.206	-1	33.9		55.8	TIMS	SEDIMENTARY	UNKNOWN	UNKNOWN	SILICICLASTIC
DSDP019-0183-039R-001/103-110		SEDDB	10.1016/j.gca.2011.07.046	THE Hf-Nd ISOTOPIC COMPOSITION OF MARINE SEDIMENTS	GEOCHIM COSMOCHIM ACTA	VERVOORT, J; PLANK, T; PRYTULAK, J	DSDP Leg 19	52.5717	-161.206	-1	33.9		55.8	ICP	SEDIMENTARY	UNKNOWN	UNKNOWN	SILICICLASTIC
DSDP019-0183-039R-001/103-110		SEDDB	10.1029/2005gc001202	LITHIUM ISOTOPIC COMPOSITION OF MARINE SEDIMENTS	GEOCHEM GEOPHYS GEOSYST	CHAN, L; LEEMAN, W; PLANK, T	DSDP Leg 19	52.5717	-161.206	-1	33.9		55.8	MC-ICP-MS	SEDIMENTARY	UNKNOWN	UNKNOWN	SILICICLASTIC
DSDP019-0183-039R-001/103-110		SEDDB	10.1029/2005gc001202	LITHIUM ISOTOPIC COMPOSITION OF MARINE SEDIMENTS	GEOCHEM GEOPHYS GEOSYST	CHAN, L; LEEMAN, W; PLANK, T	DSDP Leg 19	52.5717	-161.206	-1	33.9		55.8	FL-ES	SEDIMENTARY	UNKNOWN	UNKNOWN	SILICICLASTIC
DSDP019-0183-039R-001/103-110		SEDDB	10.1029/2005gc001202	LITHIUM ISOTOPIC COMPOSITION OF MARINE SEDIMENTS	GEOCHEM GEOPHYS GEOSYST	CHAN, L; LEEMAN, W; PLANK, T	DSDP Leg 19	52.5717	-161.206	-1	33.9		55.8	IGN	SEDIMENTARY	UNKNOWN	UNKNOWN	SILICICLASTIC															6.79
DSDP019-0183-039R-001/103-110		SEDDB	10.1029/2005gc001202	LITHIUM ISOTOPIC COMPOSITION OF MARINE SEDIMENTS	GEOCHEM GEOPHYS GEOSYST	CHAN, L; LEEMAN, W; PLANK, T	DSDP Leg 19	52.5717	-161.206	-1	33.9		55.8	DCP	SEDIMENTARY	UNKNOWN	UNKNOWN	SILICICLASTIC	52.94	0.82	15.37				9.69	3.58	2.18		2.58	3.13	0.921	1.983
DSDP019-0183-039R-001/103-110		SEDDB	10.1029/2005gc001202	LITHIUM ISOTOPIC COMPOSITION OF MARINE SEDIMENTS	GEOCHEM GEOPHYS GEOSYST	CHAN, L; LEEMAN, W; PLANK, T	DSDP Leg 19	52.5717	-161.206	-1	33.9		55.8	TIMS	SEDIMENTARY	UNKNOWN	UNKNOWN	SILICICLASTIC
DSDP019-0183-039R-001/103-110		SEDDB	10.1029/2005gc001202	LITHIUM ISOTOPIC COMPOSITION OF MARINE SEDIMENTS	GEOCHEM GEOPHYS GEOSYST	CHAN, L; LEEMAN, W; PLANK, T	DSDP Leg 19	52.5717	-161.206	-1	33.9		55.8	TIMS-ID	SEDIMENTARY	UNKNOWN	UNKNOWN	SILICICLASTIC																						189	46
DSDP019-0183-039R-001/103-110		SEDDB	10.1029/2005gc001202	LITHIUM ISOTOPIC COMPOSITION OF MARINE SEDIMENTS	GEOCHEM GEOPHYS GEOSYST	CHAN, L; LEEMAN, W; PLANK, T	DSDP Leg 19	52.5717	-161.206	-1	33.9		55.8	INAA	SEDIMENTARY	UNKNOWN	UNKNOWN	SILICICLASTIC						8.73					2.32			8.73				129.8		152		203	43.4	10.7		6.73					15.4
DSDP019-0183-039R-001/103-110		SEDDB	10.1029/2005gc001202	LITHIUM ISOTOPIC COMPOSITION OF MARINE SEDIMENTS	GEOCHEM GEOPHYS GEOSYST	CHAN, L; LEEMAN, W; PLANK, T	DSDP Leg 19	52.5717	-161.206	-1	33.9		55.8	ICPMS	SEDIMENTARY	UNKNOWN	UNKNOWN	SILICICLASTIC		0.748																116.84		160.3	40.97	190.6	44.69	11.25	45.82	6.767	37.95	7.459	19.02		16.5
DSDP019-0183-039R-001/103-110		SEDDB	10.1029/2005gc001202	LITHIUM ISOTOPIC COMPOSITION OF MARINE SEDIMENTS	GEOCHEM GEOPHYS GEOSYST	CHAN, L; LEEMAN, W; PLANK, T	DSDP Leg 19	52.5717	-161.206	-1	33.9		55.8	TIMS	SEDIMENTARY	UNKNOWN	UNKNOWN	SILICICLASTIC
DSDP019-0183-039R-001/103-110		SEDDB	10.1029/2005gc001202	LITHIUM ISOTOPIC COMPOSITION OF MARINE SEDIMENTS	GEOCHEM GEOPHYS GEOSYST	CHAN, L; LEEMAN, W; PLANK, T	DSDP Leg 19	52.5717	-161.206	-1	33.9		55.8	ICP	SEDIMENTARY	UNKNOWN	UNKNOWN	SILICICLASTIC
DSDP019-0183-039R-001/103-110		SEDDB	10.1016/S0009-2541(97)00150-2	THE CHEMICAL COMPOSITION OF SUBDUCTING SEDIMENT AND ITS CONSEQUENCES FOR THE CRUST AND MANTLE	CHEMICAL GEOLOGY	PLANK, T; LANGMUIR, C	DSDP Leg 19	52.5717	-161.206	-1	33.9		55.8	MC-ICP-MS	SEDIMENTARY	UNKNOWN	UNKNOWN	SILICICLASTIC
DSDP019-0183-039R-001/103-110		SEDDB	10.1016/S0009-2541(97)00150-2	THE CHEMICAL COMPOSITION OF SUBDUCTING SEDIMENT AND ITS CONSEQUENCES FOR THE CRUST AND MANTLE	CHEMICAL GEOLOGY	PLANK, T; LANGMUIR, C	DSDP Leg 19	52.5717	-161.206	-1	33.9		55.8	FL-ES	SEDIMENTARY	UNKNOWN	UNKNOWN	SILICICLASTIC
DSDP019-0183-039R-001/103-110		SEDDB	10.1016/S0009-2541(97)00150-2	THE CHEMICAL COMPOSITION OF SUBDUCTING SEDIMENT AND ITS CONSEQUENCES FOR THE CRUST AND MANTLE	CHEMICAL GEOLOGY	PLANK, T; LANGMUIR, C	DSDP Leg 19	52.5717	-161.206	-1	33.9		55.8	IGN	SEDIMENTARY	UNKNOWN	UNKNOWN	SILICICLASTIC															6.79
DSDP019-0183-039R-001/103-110		SEDDB	10.1016/S0009-2541(97)00150-2	THE CHEMICAL COMPOSITION OF SUBDUCTING SEDIMENT AND ITS CONSEQUENCES FOR THE CRUST AND MANTLE	CHEMICAL GEOLOGY	PLANK, T; LANGMUIR, C	DSDP Leg 19	52.5717	-161.206	-1	33.9		55.8	DCP	SEDIMENTARY	UNKNOWN	UNKNOWN	SILICICLASTIC	52.94	0.82	15.37				9.69	3.58	2.18		2.58	3.13	0.921	1.983
DSDP019-0183-039R-001/103-110		SEDDB	10.1016/S0009-2541(97)00150-2	THE CHEMICAL COMPOSITION OF SUBDUCTING SEDIMENT AND ITS CONSEQUENCES FOR THE CRUST AND MANTLE	CHEMICAL GEOLOGY	PLANK, T; LANGMUIR, C	DSDP Leg 19	52.5717	-161.206	-1	33.9		55.8	TIMS	SEDIMENTARY	UNKNOWN	UNKNOWN	SILICICLASTIC
DSDP019-0183-039R-001/103-110		SEDDB	10.1016/S0009-2541(97)00150-2	THE CHEMICAL COMPOSITION OF SUBDUCTING SEDIMENT AND ITS CONSEQUENCES FOR THE CRUST AND MANTLE	CHEMICAL GEOLOGY	PLANK, T; LANGMUIR, C	DSDP Leg 19	52.5717	-161.206	-1	33.9		55.8	TIMS-ID	SEDIMENTARY	UNKNOWN	UNKNOWN	SILICICLASTIC																						189	46
DSDP019-0183-039R-001/103-110		SEDDB	10.1016/S0009-2541(97)00150-2	THE CHEMICAL COMPOSITION OF SUBDUCTING SEDIMENT AND ITS CONSEQUENCES FOR THE CRUST AND MANTLE	CHEMICAL GEOLOGY	PLANK, T; LANGMUIR, C	DSDP Leg 19	52.5717	-161.206	-1	33.9		55.8	INAA	SEDIMENTARY	UNKNOWN	UNKNOWN	SILICICLASTIC						8.73					2.32			8.73				129.8		152		203	43.4	10.7		6.73					15.4
DSDP019-0183-039R-001/103-110		SEDDB	10.1016/S0009-2541(97)00150-2	THE CHEMICAL COMPOSITION OF SUBDUCTING SEDIMENT AND ITS CONSEQUENCES FOR THE CRUST AND MANTLE	CHEMICAL GEOLOGY	PLANK, T; LANGMUIR, C	DSDP Leg 19	52.5717	-161.206	-1	33.9		55.8	ICPMS	SEDIMENTARY	UNKNOWN	UNKNOWN	SILICICLASTIC		0.748																116.84		160.3	40.97	190.6	44.69	11.25	45.82	6.767	37.95	7.459	19.02		16.5
DSDP019-0183-039R-001/103-110		SEDDB	10.1016/S0009-2541(97)00150-2	THE CHEMICAL COMPOSITION OF SUBDUCTING SEDIMENT AND ITS CONSEQUENCES FOR THE CRUST AND MANTLE	CHEMICAL GEOLOGY	PLANK, T; LANGMUIR, C	DSDP Leg 19	52.5717	-161.206	-1	33.9		55.8	TIMS	SEDIMENTARY	UNKNOWN	UNKNOWN	SILICICLASTIC
DSDP019-0183-039R-001/103-110		SEDDB	10.1016/S0009-2541(97)00150-2	THE CHEMICAL COMPOSITION OF SUBDUCTING SEDIMENT AND ITS CONSEQUENCES FOR THE CRUST AND MANTLE	CHEMICAL GEOLOGY	PLANK, T; LANGMUIR, C	DSDP Leg 19	52.5717	-161.206	-1	33.9		55.8	ICP	SEDIMENTARY	UNKNOWN	UNKNOWN	SILICICLASTIC
DSDP005-0038-002R-003/57-59		SEDDB	10.1016/0016-7037(88)90206-2	CRUSTAL RECYCLING AND THE ALEUTIAN ARC	GEOCHIM COSMOCHIM ACTA	KAY, R; KAY, S	DSDP Leg 5	38.702	-140.355	-1	33.9		55.8	INAA	SEDIMENTARY	UNKNOWN	UNKNOWN	SILICICLASTIC						6.56					3.02			0.109				38.1		49		32.6	7.04	1.43		1.07					3.11
[truncated: 25,764 more rows]
[truncated: 76 more columns]

## Sheet: References
References
AUTHOR	YEAR	TITLE	JOURNAL
[truncated: 194 more rows]
