# Supplementary material for: Basic chemical compositions combination rules and quantitative criterion of red beds
Source: Copernicus journal article supplement (doi:10.5194/egusphere-2023-2590), 2024-01-29
Supplement: Supplementary file 11 [file Supplementary Table 19-tuff_EarthChem.xlsx]

## Sheet: Data
EarthChem Download: Saturday, May. 6, 2023 7:47:28 am
Search Criteria:
RockName	tuff
SAMPLE ID	IGSN	SOURCE	DOI	TITLE	JOURNAL	AUTHOR	CRUISEID	LATITUDE	LONGITUDE	LOC PREC	MIN AGE	AGE	MAX AGE	METHOD	MATERIAL	TYPE	COMPOSITION	ROCK NAME	MINERAL	SIO2	TIO2	AL2O3	CR2O3	FE2O3	FE2O3T	FEO	FEOT	NIO	MNO	MGO	CAO	SRO	NA2O	K2O	P2O5	BAO	LOI	H2O	H2O_M	H2O_P	SO2	SO3	SI	FE	MN	NI	CO	CU	CD
C-980		NAVDAT		Analysis of geologic materials by wavelength-dispersive X-ray fluorescence spectrometry.	U. S. Geological Survey Bulletin. Pages E1-E19. 1987. .	Taggart-Joseph-E Jr.; Lindsay-J-R; Scott-B-A; Vivit-Davison-V; Bartel-A-J; Stewart-Kathleen-C		37.9333	-106.935	0.0001	26	26.75	27.5	XRF	IGNEOUS	VOLCANIC	FELSIC	TUFF		64.31	0.6	16.14		4.55					0.25	1.02	3.36		3.52	3.99	1.7		0.05
C-741		NAVDAT		Analysis of geologic materials by wavelength-dispersive X-ray fluorescence spectrometry.	U. S. Geological Survey Bulletin. Pages E1-E19. 1987. .	Taggart-Joseph-E Jr.; Lindsay-J-R; Scott-B-A; Vivit-Davison-V; Bartel-A-J; Stewart-Kathleen-C		37.9006	-106.997	0.0001	27	27.1	27.2	XRF	IGNEOUS	VOLCANIC	FELSIC	TUFF		72.14	0.46	14.35		2.78					0.04	0.59	1.63		3.66	4.68	0.12		0
C-816		NAVDAT		Analysis of geologic materials by wavelength-dispersive X-ray fluorescence spectrometry.	U. S. Geological Survey Bulletin. Pages E1-E19. 1987. .	Taggart-Joseph-E Jr.; Lindsay-J-R; Scott-B-A; Vivit-Davison-V; Bartel-A-J; Stewart-Kathleen-C		37.8722	-106.956	0.0001	27	27.1	27.2	XRF	IGNEOUS	VOLCANIC	FELSIC	TUFF		68.05	0.41	17.29		2.29					0.03	0.47	2.24		4.37	4.88	0.11		0
C-224B		NAVDAT		Analysis of geologic materials by wavelength-dispersive X-ray fluorescence spectrometry.	U. S. Geological Survey Bulletin. Pages E1-E19. 1987. .	Taggart-Joseph-E Jr.; Lindsay-J-R; Scott-B-A; Vivit-Davison-V; Bartel-A-J; Stewart-Kathleen-C		37.9139	-106.915	0.0001	27	27.1	27.2	XRF	IGNEOUS	VOLCANIC	FELSIC	TUFF		68.23	0.45	17.01		2.4					0.04	0.73	2.04		4.18	4.79	0.12		0
MB-15-64		NAVDAT		Isotopic studies in the Roskruge Mountains, Pima County, Arizona	Geological Society of America Bulletin, vol.78, no.8, pp.1029-1036, 1967	Bikerman, Michael		32.1386	-111.391	0.001	64.9	67.9	70.9	MS	IGNEOUS	VOLCANIC	FELSIC	TUFF
MB-15-64		NAVDAT		Isotopic studies in the Roskruge Mountains, Pima County, Arizona	Geological Society of America Bulletin, vol.78, no.8, pp.1029-1036, 1967	Bikerman, Michael		32.1386	-111.391	0.001	64.9	67.9	70.9	XRF	IGNEOUS	VOLCANIC	FELSIC	TUFF
2		NAVDAT		Silent Canyon volcanic center, Nye County, Nevada.	Memoir - Geological Society of America. Pages 65-75. 1968.	Noble-Donald-C; Sargent-K-A; Mehnert-H-H; Ekren-E-B; Byers-F-M Jr.		37.3417	-116.017	0.0001	13.67	14.17	14.67	OES	IGNEOUS	VOLCANIC	FELSIC	TUFF																													0.0008
2		NAVDAT		Silent Canyon volcanic center, Nye County, Nevada.	Memoir - Geological Society of America. Pages 65-75. 1968.	Noble-Donald-C; Sargent-K-A; Mehnert-H-H; Ekren-E-B; Byers-F-M Jr.		37.3417	-116.017	0.0001	13.67	14.17	14.67	UNKNOWN	IGNEOUS	VOLCANIC	FELSIC	TUFF		73.8	0.22	11.3		1.7		1.8			0.17	0.02	0.25		5.4	4.5	0.01					0.2
C-583		NAVDAT		The determination of 30 elements in geological materials by energy dispersion X-ray fluorescence spectrometry.	Open-File Report - U. S. Geological Survey. Pages U1-U11. 2002. .	Siems-David-F		37.9186	-106.957	0.0001	26	26.75	27.5	XRF	IGNEOUS	VOLCANIC	FELSIC	TUFF
C-988		NAVDAT		Analysis of geologic materials by wavelength-dispersive X-ray fluorescence spectrometry.	U. S. Geological Survey Bulletin. Pages E1-E19. 1987. .	Taggart-Joseph-E Jr.; Lindsay-J-R; Scott-B-A; Vivit-Davison-V; Bartel-A-J; Stewart-Kathleen-C		37.8908	-106.916	0.0001	27.25	27.35	27.45	XRF	IGNEOUS	VOLCANIC	FELSIC	TUFF		75.99	0.19	12.76		1.01					0.02	0.12	0.12		0.4	9.12	0.01		0.78
C-900		NAVDAT		Analysis of geologic materials by wavelength-dispersive X-ray fluorescence spectrometry.	U. S. Geological Survey Bulletin. Pages E1-E19. 1987. .	Taggart-Joseph-E Jr.; Lindsay-J-R; Scott-B-A; Vivit-Davison-V; Bartel-A-J; Stewart-Kathleen-C		37.8708	-106.846	0.0001	27.25	27.35	27.45	XRF	IGNEOUS	VOLCANIC	FELSIC	TUFF		74.32	0.21	14.12		1.12					0.02	0.18	0.35		2.17	7.25	0.02		0.95
C-992		NAVDAT		Analysis of geologic materials by wavelength-dispersive X-ray fluorescence spectrometry.	U. S. Geological Survey Bulletin. Pages E1-E19. 1987. .	Taggart-Joseph-E Jr.; Lindsay-J-R; Scott-B-A; Vivit-Davison-V; Bartel-A-J; Stewart-Kathleen-C		37.885	-106.935	0.0001	27.25	27.35	27.45	XRF	IGNEOUS	VOLCANIC	FELSIC	TUFF		76.2	0.2	12.06		1.18					0.02	0.18	0.19		1.01	8.9	0.03		0.22
MB-1-64		NAVDAT		Isotopic studies in the Roskruge Mountains, Pima County, Arizona	Geological Society of America Bulletin, vol.78, no.8, pp.1029-1036, 1967	Bikerman, Michael		32.0781	-111.464	0.001	69.9	71.5	73.1	MS	IGNEOUS	VOLCANIC	FELSIC	TUFF
MB-1-64		NAVDAT		Isotopic studies in the Roskruge Mountains, Pima County, Arizona	Geological Society of America Bulletin, vol.78, no.8, pp.1029-1036, 1967	Bikerman, Michael		32.0781	-111.464	0.001	69.9	71.5	73.1	XRF	IGNEOUS	VOLCANIC	FELSIC	TUFF
3		NAVDAT		Silent Canyon volcanic center, Nye County, Nevada.	Memoir - Geological Society of America. Pages 65-75. 1968.	Noble-Donald-C; Sargent-K-A; Mehnert-H-H; Ekren-E-B; Byers-F-M Jr.		37.3417	-116.017	0.0001	13.67	14.17	14.67	UNKNOWN	IGNEOUS	VOLCANIC	FELSIC	TUFF		74	0.22	11.3		2.5		1			0.17	0.1	0.3		4.8	4.6	0.02					0.4
E-2252		NAVDAT		Strontium isotopic composition of basaltic lavas from the Snake Riverplain, southern Idaho	Earth and Planetary Science Letters, vol.11, no.5, pp.420-434, 1971	Leeman, William P; Manton, W I		43.3	-114.017	0.1	1.8	3.55	5.3	TIMS	IGNEOUS	VOLCANIC	FELSIC	TUFF
E-2252		NAVDAT		Strontium isotopic composition of basaltic lavas from the Snake Riverplain, southern Idaho	Earth and Planetary Science Letters, vol.11, no.5, pp.420-434, 1971	Leeman, William P; Manton, W I		43.3	-114.017	0.1	1.8	3.55	5.3	AAS	IGNEOUS	VOLCANIC	FELSIC	TUFF
B-88		NAVDAT		The magma chamber of the Bishop Tuff; gradients in temperature,pressure, and composition	Thesis or dissertation; Doctoral; Monographic	Hildreth, Edward Wesley		37.4699	-118.37	0.001	0.759	0.76	0.761	XRF	IGNEOUS	VOLCANIC	FELSIC	TUFF
B-72		NAVDAT		The magma chamber of the Bishop Tuff; gradients in temperature,pressure, and composition	Thesis or dissertation; Doctoral; Monographic	Hildreth, Edward Wesley		37.8744	-118.925	0.001	0.759	0.76	0.761	XRF	IGNEOUS	VOLCANIC	FELSIC	TUFF
B-72		NAVDAT		The magma chamber of the Bishop Tuff; gradients in temperature,pressure, and composition	Thesis or dissertation; Doctoral; Monographic	Hildreth, Edward Wesley		37.8744	-118.925	0.001	0.759	0.76	0.761	WET	IGNEOUS	VOLCANIC	FELSIC	TUFF		74.2	0.21	12.79		0.57		0.53			0.03	0.22	0.81		3.52	5.3	0.045			0.62	0.19
B-72		NAVDAT		The magma chamber of the Bishop Tuff; gradients in temperature,pressure, and composition	Thesis or dissertation; Doctoral; Monographic	Hildreth, Edward Wesley		37.8744	-118.925	0.001	0.759	0.76	0.761	INAA	IGNEOUS	VOLCANIC	FELSIC	TUFF																											199		1.27
B-78		NAVDAT		The magma chamber of the Bishop Tuff; gradients in temperature,pressure, and composition	Thesis or dissertation; Doctoral; Monographic	Hildreth, Edward Wesley		37.8616	-119.075	0.001	0.759	0.76	0.761	XRF	IGNEOUS	VOLCANIC	FELSIC	TUFF
B-78		NAVDAT		The magma chamber of the Bishop Tuff; gradients in temperature,pressure, and composition	Thesis or dissertation; Doctoral; Monographic	Hildreth, Edward Wesley		37.8616	-119.075	0.001	0.759	0.76	0.761	WET	IGNEOUS	VOLCANIC	FELSIC	TUFF		73.3	0.2	12.71		0.72		0.39			0.03	0.15	0.89		3.22	5.37	0.06			1.59	0.3
B-69		NAVDAT		The magma chamber of the Bishop Tuff; gradients in temperature,pressure, and composition	Thesis or dissertation; Doctoral; Monographic	Hildreth, Edward Wesley		37.8043	-118.797	0.001	0.759	0.76	0.761	INAA	IGNEOUS	VOLCANIC	FELSIC	TUFF																											176		1.02
B-105		NAVDAT		The magma chamber of the Bishop Tuff; gradients in temperature,pressure, and composition	Thesis or dissertation; Doctoral; Monographic	Hildreth, Edward Wesley		37.7446	-118.455	0.001	0.759	0.76	0.761	XRF	IGNEOUS	VOLCANIC	FELSIC	TUFF
B-109		NAVDAT		The magma chamber of the Bishop Tuff; gradients in temperature,pressure, and composition	Thesis or dissertation; Doctoral; Monographic	Hildreth, Edward Wesley		37.4509	-118.399	0.001	0.759	0.76	0.761	WET	IGNEOUS	VOLCANIC	FELSIC	TUFF													0.59		3.77	4.74				2.22	0.24
B-109		NAVDAT		The magma chamber of the Bishop Tuff; gradients in temperature,pressure, and composition	Thesis or dissertation; Doctoral; Monographic	Hildreth, Edward Wesley		37.4509	-118.399	0.001	0.759	0.76	0.761	XRF	IGNEOUS	VOLCANIC	FELSIC	TUFF		74.42	0.07									0.07
B-109		NAVDAT		The magma chamber of the Bishop Tuff; gradients in temperature,pressure, and composition	Thesis or dissertation; Doctoral; Monographic	Hildreth, Edward Wesley		37.4509	-118.399	0.001	0.759	0.76	0.761	INAA	IGNEOUS	VOLCANIC	FELSIC	TUFF				11.64				0.56			0.03																254		0.43
B-108		NAVDAT		The magma chamber of the Bishop Tuff; gradients in temperature,pressure, and composition	Thesis or dissertation; Doctoral; Monographic	Hildreth, Edward Wesley		37.451	-118.398	0.001	0.759	0.76	0.761	INAA	IGNEOUS	VOLCANIC	FELSIC	TUFF				11.92				0.73			0.03																218		0.57
B-108		NAVDAT		The magma chamber of the Bishop Tuff; gradients in temperature,pressure, and composition	Thesis or dissertation; Doctoral; Monographic	Hildreth, Edward Wesley		37.451	-118.398	0.001	0.759	0.76	0.761	WET	IGNEOUS	VOLCANIC	FELSIC	TUFF															3.45	4.8				1.42	0.29
838		NAVDAT		Stratigraphy of post-Paleozoic rocks and summary of resources in the Carlin-Pinon Range area, Nevada.	U. S. Geological Survey Professional Paper. 1976.	Smith-J-F Jr.; Ketner-K-B		40.5836	-116.203	0.01	156.6	178.1	199.6	UNKNOWN	IGNEOUS	VOLCANIC	FELSIC	TUFF		61.43	0.8	14.93		2.16		0.92			0.1	2.28	5.17		2.2	3.49	0.27				1.86	2.84
F-14		NAVDAT		Petrogenesis of late Tertiary potassic volcanic rocks in Sierra Nevada and western Great Basin.	Thesis-or-Dissertation	Brem-Gerald-F		38.3368	-119.378	0.01	8.6	9.65	10.7	XRF	IGNEOUS	VOLCANIC	FELSIC	TUFF		76.61	0.19	13.03		1.05		0.95			0.03	0.21	0.72		2.04	5.55	0.03		1.09
F-69-b		NAVDAT		Petrogenesis of late Tertiary potassic volcanic rocks in Sierra Nevada and western Great Basin.	Thesis-or-Dissertation	Brem-Gerald-F		38.4301	-119.449	0.01	8.6	9.65	10.7	XRF	IGNEOUS	VOLCANIC	FELSIC	TUFF		63.86	0.92	17.3		4.34		3.91			0.11	1.64	3.15		3.64	4.68	0		4.64
F-69-t		NAVDAT		Petrogenesis of late Tertiary potassic volcanic rocks in Sierra Nevada and western Great Basin.	Thesis-or-Dissertation	Brem-Gerald-F		38.4301	-119.449	0.01	8.6	9.65	10.7	XRF	IGNEOUS	VOLCANIC	FELSIC	TUFF		63.59	0.8	18.46		3.96		3.56			0.1	1.67	3.15		3.64	4.68	0		4.19
HR72-11		NAVDAT		Rapid analysis of silicate, carbonate, and phosphate rocks.	U. S. Geological Survey Bulletin. Pages A1-A56. 1962.	Shapiro-Leonard; Brannock-W-W		36.2039	-117.924	0.001	2.268	2.52	2.772	UNKNOWN	IGNEOUS	VOLCANIC	FELSIC	TUFF																				2.93
673		NAVDAT		Stratigraphy of the Tertiary ash-flow tuffs in the Yerington District, Nevada	Report - Nevada, Bureau of Mines, no.27, 28 pp., 1976	Proffett, J M, Jr; Proffett, B H		38.9511	-119.217	0.01	1.8	33.4	65	FPHOT	IGNEOUS	VOLCANIC	FELSIC	TUFF												0.06			2.42
672		NAVDAT		Stratigraphy of the Tertiary ash-flow tuffs in the Yerington District, Nevada	Report - Nevada, Bureau of Mines, no.27, 28 pp., 1976	Proffett, J M, Jr; Proffett, B H		38.9503	-119.221	0.01	1.8	33.4	65	UNKNOWN	IGNEOUS	VOLCANIC	FELSIC	TUFF		75.84	0.22	11.57		1.06	1.06	0			0.03	0.04	0.29		1.54	6.12	0.05				0.66	0.82
BC397		NAVDAT		Chemistry of Tertiary volcanic rocks in the Eldorado Mountains, Clark County, Nevada, and comparisons with rocks from some nearby areas.	Journal of Research of the U. S. Geological Survey. 6; 3, Pages 409-424. 1978.	Anderson-R-E		35.7667	-114.833	0.01	14	15.55	17.1	RAPID_ROCK	IGNEOUS	VOLCANIC	FELSIC	TUFF		67.8	0.5	13.9		2.3		0.06			0.04	1.2	2.4		4	4.6	0.2				0.51	0.79
6		NAVDAT		Tertiary volcanism and caldera development near Durango City, Sierra Madre Occidental, Mexico	Geological Society of America Bulletin, vol.89, no.7, pp.1000-1012, Jul 1978	Swanson, E R; Keizer, R P; Lyons, J I; Clabaugh, S E		23.75	-105.417	0.1	23	23.3	23.6	UNKNOWN	IGNEOUS	VOLCANIC	FELSIC	TUFF		73.33	0.29	13.97		1.4		0.4			0.05	0.12	0.67		4.68	4.12	0.02				0.22	0.48
8		NAVDAT		Tertiary volcanism and caldera development near Durango City, Sierra Madre Occidental, Mexico	Geological Society of America Bulletin, vol.89, no.7, pp.1000-1012, Jul 1978	Swanson, E R; Keizer, R P; Lyons, J I; Clabaugh, S E		24.0333	-104.45	0.1	30.7	31.8	34	UNKNOWN	IGNEOUS	VOLCANIC	FELSIC	TUFF		76.9	0.09	11.8		1.23		0.2			0.04	0.07	0.38		3.23	4.55	0.05				0.13	0.68
G1003		NAVDAT		Age and composition of igneous rocks, Edna Mountain Quadrangle, Humboldt County, Nevada	Journal of Research of the U. S. Geological Survey, vol.6, no.6, pp.727-743, 1978	Erickson, R L; Silberman, M L; Marsh, S P		40.9842	-117.447	0.001	23.1	23.8	24.5	SPEC	IGNEOUS	VOLCANIC	INTERMEDIATE	TUFF																														7
25		NAVDAT		Geology and uranium content of middle Tertiary ash-flow tuffs in thenorthern part of Dogskin Mountain, Nevada	Thesis or dissertation; Master's; Monographic	Hutton, Robert A		39.9167	-119.805	1	19.21	22.78	26.34	NAA	IGNEOUS	VOLCANIC	FELSIC	TUFF
M-11		NAVDAT		Geology and uranium content of middle Tertiary ash-flow tuffs in thenorthern part of Dogskin Mountain, Nevada	Thesis or dissertation; Master's; Monographic	Hutton, Robert A		39.9426	-119.833	0.001	27	29.05	31.1	FLUOR	IGNEOUS	VOLCANIC	FELSIC	TUFF
M-11		NAVDAT		Geology and uranium content of middle Tertiary ash-flow tuffs in thenorthern part of Dogskin Mountain, Nevada	Thesis or dissertation; Master's; Monographic	Hutton, Robert A		39.9426	-119.833	0.001	27	29.05	31.1	XRF	IGNEOUS	VOLCANIC	FELSIC	TUFF		71.7	0.11	14.4		2.37						0.105	0.2		0.7	6.21	0.05
B-5		NAVDAT		Geology and uranium content of middle Tertiary ash-flow tuffs in thenorthern part of Dogskin Mountain, Nevada	Thesis or dissertation; Master's; Monographic	Hutton, Robert A		39.7653	-119.673	0.001	27	29.05	31.1	FLUOR	IGNEOUS	VOLCANIC	FELSIC	TUFF
B-5		NAVDAT		Geology and uranium content of middle Tertiary ash-flow tuffs in thenorthern part of Dogskin Mountain, Nevada	Thesis or dissertation; Master's; Monographic	Hutton, Robert A		39.7653	-119.673	0.001	27	29.05	31.1	XRF	IGNEOUS	VOLCANIC	FELSIC	TUFF		77.5	0.15	14.2		1.95						0.165	0.69		2.7	4.34	0.05
27		NAVDAT		Geology and uranium content of middle Tertiary ash-flow tuffs in thenorthern part of Dogskin Mountain, Nevada	Thesis or dissertation; Master's; Monographic	Hutton, Robert A		39.9545	-119.832	0.001	27	29.05	31.1	NAA	IGNEOUS	VOLCANIC	FELSIC	TUFF
M-33		NAVDAT		Geology and uranium content of middle Tertiary ash-flow tuffs in thenorthern part of Dogskin Mountain, Nevada	Thesis or dissertation; Master's; Monographic	Hutton, Robert A		39.9431	-119.833	0.001	27	28.07	29.13	FLUOR	IGNEOUS	VOLCANIC	FELSIC	TUFF
M-33		NAVDAT		Geology and uranium content of middle Tertiary ash-flow tuffs in thenorthern part of Dogskin Mountain, Nevada	Thesis or dissertation; Master's; Monographic	Hutton, Robert A		39.9431	-119.833	0.001	27	28.07	29.13	XRF	IGNEOUS	VOLCANIC	FELSIC	TUFF		69.1	0.35	13.5		2.25						0.56	1.82		0.97	5.45	0.05
24		NAVDAT		Geology and uranium content of middle Tertiary ash-flow tuffs in thenorthern part of Dogskin Mountain, Nevada	Thesis or dissertation; Master's; Monographic	Hutton, Robert A		39.9167	-119.805	1	27	28.07	29.13	NAA	IGNEOUS	VOLCANIC	FELSIC	TUFF
24		NAVDAT		Geology and uranium content of middle Tertiary ash-flow tuffs in thenorthern part of Dogskin Mountain, Nevada	Thesis or dissertation; Master's; Monographic	Hutton, Robert A		39.9167	-119.805	1	27	28.07	29.13	XRF	IGNEOUS	VOLCANIC	FELSIC	TUFF		67.2	0.41	14.9		2.36					0.05	0.57	1.74		3.14	4.59	0.11
Z-10		NAVDAT		Geology and uranium content of middle Tertiary ash-flow tuffs in thenorthern part of Dogskin Mountain, Nevada	Thesis or dissertation; Master's; Monographic	Hutton, Robert A		39.9086	-119.998	0.001	27	28.07	29.13	FLUOR	IGNEOUS	VOLCANIC	FELSIC	TUFF
Z-10		NAVDAT		Geology and uranium content of middle Tertiary ash-flow tuffs in thenorthern part of Dogskin Mountain, Nevada	Thesis or dissertation; Master's; Monographic	Hutton, Robert A		39.9086	-119.998	0.001	27	28.07	29.13	XRF	IGNEOUS	VOLCANIC	FELSIC	TUFF		67.2	0.19	11.9		2.46						0.096	0.55		3.56	5.07	0.05
B-3		NAVDAT		Geology and uranium content of middle Tertiary ash-flow tuffs in thenorthern part of Dogskin Mountain, Nevada	Thesis or dissertation; Master's; Monographic	Hutton, Robert A		39.7655	-119.567	0.001	19.21	22.78	26.34	FLUOR	IGNEOUS	VOLCANIC	FELSIC	TUFF
B-3		NAVDAT		Geology and uranium content of middle Tertiary ash-flow tuffs in thenorthern part of Dogskin Mountain, Nevada	Thesis or dissertation; Master's; Monographic	Hutton, Robert A		39.7655	-119.567	0.001	19.21	22.78	26.34	XRF	IGNEOUS	VOLCANIC	FELSIC	TUFF		72.1	0.14	11.9		2.29						0.062	0.47		2.56	5.72	0.05
B-3a		NAVDAT		Geology and uranium content of middle Tertiary ash-flow tuffs in thenorthern part of Dogskin Mountain, Nevada	Thesis or dissertation; Master's; Monographic	Hutton, Robert A		39.7655	-119.567	0.001	19.21	22.78	26.34	FLUOR	IGNEOUS	VOLCANIC	FELSIC	TUFF
B-3a		NAVDAT		Geology and uranium content of middle Tertiary ash-flow tuffs in thenorthern part of Dogskin Mountain, Nevada	Thesis or dissertation; Master's; Monographic	Hutton, Robert A		39.7655	-119.567	0.001	19.21	22.78	26.34	XRF	IGNEOUS	VOLCANIC	FELSIC	TUFF		71.2	0.15	11.8		2.6						0.242	0.49		2.81	5.47	0.05
25		NAVDAT		Geology and uranium content of middle Tertiary ash-flow tuffs in thenorthern part of Dogskin Mountain, Nevada	Thesis or dissertation; Master's; Monographic	Hutton, Robert A		39.9167	-119.805	1	19.21	22.78	26.34	XRF	IGNEOUS	VOLCANIC	FELSIC	TUFF		70.8	0.34	14.5		2.74					0.03	0.161	0.63		4.37	5.45	0.07
B-4		NAVDAT		Geology and uranium content of middle Tertiary ash-flow tuffs in thenorthern part of Dogskin Mountain, Nevada	Thesis or dissertation; Master's; Monographic	Hutton, Robert A		39.7747	-119.572	0.001	27	29.05	31.1	FLUOR	IGNEOUS	VOLCANIC	FELSIC	TUFF
B-4		NAVDAT		Geology and uranium content of middle Tertiary ash-flow tuffs in thenorthern part of Dogskin Mountain, Nevada	Thesis or dissertation; Master's; Monographic	Hutton, Robert A		39.7747	-119.572	0.001	27	29.05	31.1	XRF	IGNEOUS	VOLCANIC	FELSIC	TUFF		75.3	0.12	11		2.21						0.297	1.14		2.12	3.66	0.05
26		NAVDAT		Geology and uranium content of middle Tertiary ash-flow tuffs in thenorthern part of Dogskin Mountain, Nevada	Thesis or dissertation; Master's; Monographic	Hutton, Robert A		39.7747	-119.572	0.1	27	29.05	31.1	NAA	IGNEOUS	VOLCANIC	FELSIC	TUFF
26		NAVDAT		Geology and uranium content of middle Tertiary ash-flow tuffs in thenorthern part of Dogskin Mountain, Nevada	Thesis or dissertation; Master's; Monographic	Hutton, Robert A		39.7747	-119.572	0.1	27	29.05	31.1	XRF	IGNEOUS	VOLCANIC	FELSIC	TUFF		73.3	0.11	11.1		1.29					0.02	0.2	0.73		1.82	5.56	0.03
M-7		NAVDAT		Geology and uranium content of middle Tertiary ash-flow tuffs in thenorthern part of Dogskin Mountain, Nevada	Thesis or dissertation; Master's; Monographic	Hutton, Robert A		39.9426	-119.833	0.1	27	29.05	31.1	FLUOR	IGNEOUS	VOLCANIC	FELSIC	TUFF
M-9		NAVDAT		Geology and uranium content of middle Tertiary ash-flow tuffs in thenorthern part of Dogskin Mountain, Nevada	Thesis or dissertation; Master's; Monographic	Hutton, Robert A		39.9426	-119.833	0.1	27	29.05	31.1	FLUOR	IGNEOUS	VOLCANIC	FELSIC	TUFF
M-21		NAVDAT		Geology and uranium content of middle Tertiary ash-flow tuffs in thenorthern part of Dogskin Mountain, Nevada	Thesis or dissertation; Master's; Monographic	Hutton, Robert A		39.9426	-119.833	0.1	27	29.05	31.1	FLUOR	IGNEOUS	VOLCANIC	FELSIC	TUFF
M-17		NAVDAT		Geology and uranium content of middle Tertiary ash-flow tuffs in thenorthern part of Dogskin Mountain, Nevada	Thesis or dissertation; Master's; Monographic	Hutton, Robert A		39.9426	-119.833	0.1	27	29.05	31.1	FLUOR	IGNEOUS	VOLCANIC	FELSIC	TUFF
M-14		NAVDAT		Geology and uranium content of middle Tertiary ash-flow tuffs in thenorthern part of Dogskin Mountain, Nevada	Thesis or dissertation; Master's; Monographic	Hutton, Robert A		39.9426	-119.833	0.1	27	29.05	31.1	FLUOR	IGNEOUS	VOLCANIC	FELSIC	TUFF
M-26		NAVDAT		Geology and uranium content of middle Tertiary ash-flow tuffs in thenorthern part of Dogskin Mountain, Nevada	Thesis or dissertation; Master's; Monographic	Hutton, Robert A		39.7573	-119.684	0.1	27	28.07	29.13	FLUOR	IGNEOUS	VOLCANIC	FELSIC	TUFF
M-36		NAVDAT		Geology and uranium content of middle Tertiary ash-flow tuffs in thenorthern part of Dogskin Mountain, Nevada	Thesis or dissertation; Master's; Monographic	Hutton, Robert A		39.7573	-119.684	0.1	27	28.07	29.13	FLUOR	IGNEOUS	VOLCANIC	FELSIC	TUFF
310		NAVDAT		Geology and uranium content of middle Tertiary ash-flow tuffs in thenorthern part of Dogskin Mountain, Nevada	Thesis or dissertation; Master's; Monographic	Hutton, Robert A		39.7655	-119.567	0.1	19.21	22.78	26.34	FLUOR	IGNEOUS	VOLCANIC	FELSIC	TUFF
70		NAVDAT		Geology and uranium content of middle Tertiary ash-flow tuffs in thenorthern part of Dogskin Mountain, Nevada	Thesis or dissertation; Master's; Monographic	Hutton, Robert A		39.7655	-119.567	0.1	19.21	22.78	26.34	FLUOR	IGNEOUS	VOLCANIC	FELSIC	TUFF
37		NAVDAT		Geology and uranium content of middle Tertiary ash-flow tuffs in thenorthern part of Dogskin Mountain, Nevada	Thesis or dissertation; Master's; Monographic	Hutton, Robert A		39.7655	-119.567	0.1	19.21	22.78	26.34	FLUOR	IGNEOUS	VOLCANIC	FELSIC	TUFF
M-27		NAVDAT		Geology and uranium content of middle Tertiary ash-flow tuffs in thenorthern part of Dogskin Mountain, Nevada	Thesis or dissertation; Master's; Monographic	Hutton, Robert A		39.7747	-119.572	0.1	23	24.05	25.1	FLUOR	IGNEOUS	VOLCANIC	FELSIC	TUFF
M-29		NAVDAT		Geology and uranium content of middle Tertiary ash-flow tuffs in thenorthern part of Dogskin Mountain, Nevada	Thesis or dissertation; Master's; Monographic	Hutton, Robert A		39.7747	-119.572	0.1	23	24.05	25.1	FLUOR	IGNEOUS	VOLCANIC	FELSIC	TUFF
20		NAVDAT		Geology and uranium content of middle Tertiary ash-flow tuffs in thenorthern part of Dogskin Mountain, Nevada	Thesis or dissertation; Master's; Monographic	Hutton, Robert A		39.7747	-119.572	0.1	23	24.05	25.1	FLUOR	IGNEOUS	VOLCANIC	FELSIC	TUFF
19		NAVDAT		Geology and uranium content of middle Tertiary ash-flow tuffs in thenorthern part of Dogskin Mountain, Nevada	Thesis or dissertation; Master's; Monographic	Hutton, Robert A		39.7747	-119.572	0.1	23	24.05	25.1	FLUOR	IGNEOUS	VOLCANIC	FELSIC	TUFF
D-228114		NAVDAT		Mount St. Helens eruptive behavior during the past 1,500 yr.	Geology Boulder. 8; 11, Pages 555-559. 1980.	Hoblitt-R-P; Crandell-D-R; Mullineaux-D-R		46.2	-122.18	0.1	0	-0.00198	-0.002178	ICPMS	IGNEOUS	VOLCANIC	FELSIC	TUFF					0.001					0.001				0.053				0.032
D-228114		NAVDAT		Mount St. Helens eruptive behavior during the past 1,500 yr.	Geology Boulder. 8; 11, Pages 555-559. 1980.	Hoblitt-R-P; Crandell-D-R; Mullineaux-D-R		46.2	-122.18	0.1	0	-0.00198	-0.002178	XRF	IGNEOUS	VOLCANIC	FELSIC	TUFF		63.2	0.57	17.2		4.43					0.06	1.91	4.92		4.59	1.32	0.13
1		NAVDAT		Primary and secondary flow structures in ash-flow tuffs of the Gribbles Run paleovalley, central Colorado.	Special Paper - Geological Society of America. 180, Pages 137-154. 1979.	Chapin-C-E; Lowell-G-R		38.5	-105.5	0.001	32.4	36	39.6	RAPID_ROCK	IGNEOUS	VOLCANIC	FELSIC	TUFF		72.2	0.38	14.3		1.1		0.32			0.02	0.25	0.78		3.3	5.7	0.05				0.63	1
2		NAVDAT		Primary and secondary flow structures in ash-flow tuffs of the Gribbles Run paleovalley, central Colorado.	Special Paper - Geological Society of America. 180, Pages 137-154. 1979.	Chapin-C-E; Lowell-G-R		38.5	-105.5	0.001	32.4	36	39.6	RAPID_ROCK	IGNEOUS	VOLCANIC	FELSIC	TUFF		69.7	0.43	15.5		1.8		0.24			0.02	0.42	0.75		2.9	5.5	0.08				0.96	1.4
3		NAVDAT		Primary and secondary flow structures in ash-flow tuffs of the Gribbles Run paleovalley, central Colorado.	Special Paper - Geological Society of America. 180, Pages 137-154. 1979.	Chapin-C-E; Lowell-G-R		38.65	-106.05	0.001	32.4	36	39.6	RAPID_ROCK	IGNEOUS	VOLCANIC	FELSIC	TUFF		66.3	0.52	15.9		1.2		0.57			0.06	0.4	1.3		3.4	6.1	0.08				0.41	2.9
4		NAVDAT		Primary and secondary flow structures in ash-flow tuffs of the Gribbles Run paleovalley, central Colorado.	Special Paper - Geological Society of America. 180, Pages 137-154. 1979.	Chapin-C-E; Lowell-G-R		38.7167	-105.85	0.001	32.4	36	39.6	RAPID_ROCK	IGNEOUS	VOLCANIC	FELSIC	TUFF		69.35	0.46	15.16		2.06		0.16			0.07	0.43	1.18		3.51	6.14	0.1				0.46	0.54
B-88		NAVDAT		The magma chamber of the Bishop Tuff; gradients in temperature,pressure, and composition	Thesis or dissertation; Doctoral; Monographic	Hildreth, Edward Wesley		37.4699	-118.37	0.001	0.759	0.76	0.761	WET	IGNEOUS	VOLCANIC	FELSIC	TUFF		74.6	0.09	12.01		0.55		0.15			0.03	0.01	0.57		3.46	4.85	0.01			1.92	0.67
B-88		NAVDAT		The magma chamber of the Bishop Tuff; gradients in temperature,pressure, and composition	Thesis or dissertation; Doctoral; Monographic	Hildreth, Edward Wesley		37.4699	-118.37	0.001	0.759	0.76	0.761	INAA	IGNEOUS	VOLCANIC	FELSIC	TUFF																											222		0.34
B-78		NAVDAT		The magma chamber of the Bishop Tuff; gradients in temperature,pressure, and composition	Thesis or dissertation; Doctoral; Monographic	Hildreth, Edward Wesley		37.8616	-119.075	0.001	0.759	0.76	0.761	INAA	IGNEOUS	VOLCANIC	FELSIC	TUFF																											175		1.17
B-77		NAVDAT		The magma chamber of the Bishop Tuff; gradients in temperature,pressure, and composition	Thesis or dissertation; Doctoral; Monographic	Hildreth, Edward Wesley		37.8609	-119.075	0.001	0.759	0.76	0.761	XRF	IGNEOUS	VOLCANIC	FELSIC	TUFF
B-77		NAVDAT		The magma chamber of the Bishop Tuff; gradients in temperature,pressure, and composition	Thesis or dissertation; Doctoral; Monographic	Hildreth, Edward Wesley		37.8609	-119.075	0.001	0.759	0.76	0.761	WET	IGNEOUS	VOLCANIC	FELSIC	TUFF		73.1	0.19	12.11		0.98		0.09			0.02	0.33	0.93		3.27	5.21	0.06			2.67	0.33
B-77		NAVDAT		The magma chamber of the Bishop Tuff; gradients in temperature,pressure, and composition	Thesis or dissertation; Doctoral; Monographic	Hildreth, Edward Wesley		37.8609	-119.075	0.001	0.759	0.76	0.761	INAA	IGNEOUS	VOLCANIC	FELSIC	TUFF																											200		0.99
B-69		NAVDAT		The magma chamber of the Bishop Tuff; gradients in temperature,pressure, and composition	Thesis or dissertation; Doctoral; Monographic	Hildreth, Edward Wesley		37.8043	-118.797	0.001	0.759	0.76	0.761	XRF	IGNEOUS	VOLCANIC	FELSIC	TUFF
B-105		NAVDAT		The magma chamber of the Bishop Tuff; gradients in temperature,pressure, and composition	Thesis or dissertation; Doctoral; Monographic	Hildreth, Edward Wesley		37.7446	-118.455	0.001	0.759	0.76	0.761	WET	IGNEOUS	VOLCANIC	FELSIC	TUFF		73.88	0.06									0.02	0.46		3.67	4.62				2.53	0.3
B-105		NAVDAT		The magma chamber of the Bishop Tuff; gradients in temperature,pressure, and composition	Thesis or dissertation; Doctoral; Monographic	Hildreth, Edward Wesley		37.7446	-118.455	0.001	0.759	0.76	0.761	XRF	IGNEOUS	VOLCANIC	FELSIC	TUFF				12.28
B-105		NAVDAT		The magma chamber of the Bishop Tuff; gradients in temperature,pressure, and composition	Thesis or dissertation; Doctoral; Monographic	Hildreth, Edward Wesley		37.7446	-118.455	0.001	0.759	0.76	0.761	INAA	IGNEOUS	VOLCANIC	FELSIC	TUFF								0.64			0.03																262		0.61
PS-66B-59		NAVDAT		The Oligocene volcanic center at Eureka, Nevada	Journal of Research of the U. S. Geological Survey, vol.3, no.5,pp.605-612, Oct 1975	Blake, M C, Jr; McKee, E H; Marvin, R F; Silberman, M L; Nolan, ThomasB		39.4121	-115.966	1	33.4	35.3	37.2	UNKNOWN	IGNEOUS	VOLCANIC	FELSIC	TUFF		62.7	0.84	15.8		3.2		3.2			0.08	2	4.2		2.6	3.1	0.22			2.1	1.2
PS-67B-28		NAVDAT		The Oligocene volcanic center at Eureka, Nevada	Journal of Research of the U. S. Geological Survey, vol.3, no.5,pp.605-612, Oct 1975	Blake, M C, Jr; McKee, E H; Marvin, R F; Silberman, M L; Nolan, ThomasB		39.4121	-115.966	1	33.4	35.3	37.2	UNKNOWN	IGNEOUS	VOLCANIC	FELSIC	TUFF		64.5	0.8	15.3		2.9		2.9			0.08	1.4	3.3		2.4	3.9	0.19			3	0.69
PS-66B-31		NAVDAT		The Oligocene volcanic center at Eureka, Nevada	Journal of Research of the U. S. Geological Survey, vol.3, no.5,pp.605-612, Oct 1975	Blake, M C, Jr; McKee, E H; Marvin, R F; Silberman, M L; Nolan, ThomasB		39.4121	-115.966	1	33.4	35.3	37.2	UNKNOWN	IGNEOUS	VOLCANIC	FELSIC	TUFF		65	0.7	15.3		3.2		3.2			0.05	1.2	3.2		2.5	3.3	0.18			3.3	1.3
PS-67B-20A		NAVDAT		The Oligocene volcanic center at Eureka, Nevada	Journal of Research of the U. S. Geological Survey, vol.3, no.5,pp.605-612, Oct 1975	Blake, M C, Jr; McKee, E H; Marvin, R F; Silberman, M L; Nolan, ThomasB		39.4121	-115.966	1	33.4	35.3	37.2	UNKNOWN	IGNEOUS	VOLCANIC	FELSIC	TUFF		65.8	0.71	15.6		2.9		2.9			0.06	1.3	3.4		2.8	3.6	0.18			1.8	1.1
2		NAVDAT		Ash-flow fissure vent in West-central Nevada	Geology, vol.4, no.4, pp.247-251, Apr 1976	Ekren, E B; Byers, F M, Jr		38.8926	-118.183	0.01	25.1	26	26.9	AAS	IGNEOUS	VOLCANIC	FELSIC	TUFF												0.02	0.59		3.98	5.11
2		NAVDAT		Ash-flow fissure vent in West-central Nevada	Geology, vol.4, no.4, pp.247-251, Apr 1976	Ekren, E B; Byers, F M, Jr		38.8926	-118.183	0.01	25.1	26	26.9	XRF	IGNEOUS	VOLCANIC	FELSIC	TUFF		74.78	0.13	14.34				1.01			0.02
3		NAVDAT		Ash-flow fissure vent in West-central Nevada	Geology, vol.4, no.4, pp.247-251, Apr 1976	Ekren, E B; Byers, F M, Jr		38.916	-118.183	0.01	22.5	25	27.5	AAS	IGNEOUS	VOLCANIC	FELSIC	TUFF												0.3	1.12		1.82	4.96
3		NAVDAT		Ash-flow fissure vent in West-central Nevada	Geology, vol.4, no.4, pp.247-251, Apr 1976	Ekren, E B; Byers, F M, Jr		38.916	-118.183	0.01	22.5	25	27.5	XRF	IGNEOUS	VOLCANIC	FELSIC	TUFF		76.82	0.16	13.5				1.31			0.02
TP64		NAVDAT		Composite stratigraphic section of Tertiary volcanic rocks in the Eldorado Mountains, Nevada.	Open-File Report - U. S. Geological Survey. 1977.	Anderson-R-E		35.7367	-114.817	0.001	14	15.55	17.1	RAPID_ROCK	IGNEOUS	VOLCANIC	FELSIC	TUFF		66.1	0.55	16		2.4		0.12			0.03	1	1.8		3.5	5.4	0.13				1	1.3
TP62		NAVDAT		Composite stratigraphic section of Tertiary volcanic rocks in the Eldorado Mountains, Nevada.	Open-File Report - U. S. Geological Survey. 1977.	Anderson-R-E		35.7364	-114.819	0.001	14	15.55	17.1	RAPID_ROCK	IGNEOUS	VOLCANIC	FELSIC	TUFF		66.9	0.44	15.6		2		0.04			0.06	0.96	1.4		3.8	5.6	0.07				1.3	1.5
HR72-11		NAVDAT		The late Cenozoic Coso volcanic field, Inyo County, California	Thesis or dissertation; Doctoral; Monographic	Babcock, J W		36.2039	-117.924	0.001	2.268	2.52	2.772	AAS	IGNEOUS	VOLCANIC	FELSIC	TUFF												0.08			3.85
HR72-11		NAVDAT		The late Cenozoic Coso volcanic field, Inyo County, California	Thesis or dissertation; Doctoral; Monographic	Babcock, J W		36.2039	-117.924	0.001	2.268	2.52	2.772	XRF	IGNEOUS	VOLCANIC	FELSIC	TUFF		74.39	0.13	12.55		0.65		0.29			0.02		1.35			4.48
672		NAVDAT		Stratigraphy of the Tertiary ash-flow tuffs in the Yerington District, Nevada	Report - Nevada, Bureau of Mines, no.27, 28 pp., 1976	Proffett, J M, Jr; Proffett, B H		38.9503	-119.221	0.01	1.8	33.4	65	XRF	IGNEOUS	VOLCANIC	FELSIC	TUFF
673		NAVDAT		Stratigraphy of the Tertiary ash-flow tuffs in the Yerington District, Nevada	Report - Nevada, Bureau of Mines, no.27, 28 pp., 1976	Proffett, J M, Jr; Proffett, B H		38.9511	-119.217	0.01	1.8	33.4	65	XRF	IGNEOUS	VOLCANIC	FELSIC	TUFF		75.64	0.24	12.61			1.26						1.24			6.2
673		NAVDAT		Stratigraphy of the Tertiary ash-flow tuffs in the Yerington District, Nevada	Report - Nevada, Bureau of Mines, no.27, 28 pp., 1976	Proffett, J M, Jr; Proffett, B H		38.9511	-119.217	0.01	1.8	33.4	65	COL	IGNEOUS	VOLCANIC	FELSIC	TUFF											0.03
673		NAVDAT		Stratigraphy of the Tertiary ash-flow tuffs in the Yerington District, Nevada	Report - Nevada, Bureau of Mines, no.27, 28 pp., 1976	Proffett, J M, Jr; Proffett, B H		38.9511	-119.217	0.01	1.8	33.4	65	WET	IGNEOUS	VOLCANIC	FELSIC	TUFF								0														1
BC392		NAVDAT		Chemistry of Tertiary volcanic rocks in the Eldorado Mountains, Clark County, Nevada, and comparisons with rocks from some nearby areas.	Journal of Research of the U. S. Geological Survey. 6; 3, Pages 409-424. 1978.	Anderson-R-E		35.7667	-114.833	0.01	14	17	20	RAPID_ROCK	IGNEOUS	VOLCANIC	FELSIC	TUFF		68.2	0.45	14.9		2.1		0.2			0.07	0.61	2.2		3.6	5	0.11				0.49	0.81
BC346		NAVDAT		Chemistry of Tertiary volcanic rocks in the Eldorado Mountains, Clark County, Nevada, and comparisons with rocks from some nearby areas.	Journal of Research of the U. S. Geological Survey. 6; 3, Pages 409-424. 1978.	Anderson-R-E		35.7667	-114.833	0.01	14	17	20	RAPID_ROCK	IGNEOUS	VOLCANIC	FELSIC	TUFF		68.2	0.4	14.8		1.7		0.12			0.06	0.61	3		4.1	5.1	0.06				0.36	0.59
4		NAVDAT		Tertiary volcanism and caldera development near Durango City, Sierra Madre Occidental, Mexico	Geological Society of America Bulletin, vol.89, no.7, pp.1000-1012, Jul 1978	Swanson, E R; Keizer, R P; Lyons, J I; Clabaugh, S E		23.75	-105.417	0.1	23	23.3	23.6	UNKNOWN	IGNEOUS	VOLCANIC	FELSIC	TUFF		68.95	0.3	14.22		1.67		0.35			0.08	0.65	1.32		3.23	5.25	0.07				1.02	3.38
5		NAVDAT		Tertiary volcanism and caldera development near Durango City, Sierra Madre Occidental, Mexico	Geological Society of America Bulletin, vol.89, no.7, pp.1000-1012, Jul 1978	Swanson, E R; Keizer, R P; Lyons, J I; Clabaugh, S E		23.75	-105.417	0.1	23	23.3	23.6	UNKNOWN	IGNEOUS	VOLCANIC	FELSIC	TUFF		74.75	0.44	13.06		1.7		0.24			0.08	0.15	1.05		3.6	3.75	0.03				0.53	0.75
G1003		NAVDAT		Age and composition of igneous rocks, Edna Mountain Quadrangle, Humboldt County, Nevada	Journal of Research of the U. S. Geological Survey, vol.6, no.6, pp.727-743, 1978	Erickson, R L; Silberman, M L; Marsh, S P		40.9842	-117.447	0.001	23.1	23.8	24.5	UNKNOWN	IGNEOUS	VOLCANIC	INTERMEDIATE	TUFF		57.6	0.68	19.2		5.4		0.52			0.07	0.58	5.3		4.5	1.2	0.28				2	2.7
M-10		NAVDAT		Geology and uranium content of middle Tertiary ash-flow tuffs in thenorthern part of Dogskin Mountain, Nevada	Thesis or dissertation; Master's; Monographic	Hutton, Robert A		39.9426	-119.833	0.001	27	29.05	31.1	FLUOR	IGNEOUS	VOLCANIC	FELSIC	TUFF
M-10		NAVDAT		Geology and uranium content of middle Tertiary ash-flow tuffs in thenorthern part of Dogskin Mountain, Nevada	Thesis or dissertation; Master's; Monographic	Hutton, Robert A		39.9426	-119.833	0.001	27	29.05	31.1	XRF	IGNEOUS	VOLCANIC	FELSIC	TUFF		68.3	0.15	13.2		2.28						0.153	2.45		1.54	4.49	0.05
27		NAVDAT		Geology and uranium content of middle Tertiary ash-flow tuffs in thenorthern part of Dogskin Mountain, Nevada	Thesis or dissertation; Master's; Monographic	Hutton, Robert A		39.9545	-119.832	0.001	27	29.05	31.1	XRF	IGNEOUS	VOLCANIC	FELSIC	TUFF		72.3	0.13	12.8		1.2					0.04	0.21	0.71		3.17	4.68	0.03
B-2		NAVDAT		Geology and uranium content of middle Tertiary ash-flow tuffs in thenorthern part of Dogskin Mountain, Nevada	Thesis or dissertation; Master's; Monographic	Hutton, Robert A		39.7573	-119.684	0.001	27	28.07	29.13	FLUOR	IGNEOUS	VOLCANIC	FELSIC	TUFF
B-2		NAVDAT		Geology and uranium content of middle Tertiary ash-flow tuffs in thenorthern part of Dogskin Mountain, Nevada	Thesis or dissertation; Master's; Monographic	Hutton, Robert A		39.7573	-119.684	0.001	27	28.07	29.13	XRF	IGNEOUS	VOLCANIC	FELSIC	TUFF		69.6	0.44	14.2		2.58						0.471	1.48		3.48	4.76	0.05
B-2a		NAVDAT		Geology and uranium content of middle Tertiary ash-flow tuffs in thenorthern part of Dogskin Mountain, Nevada	Thesis or dissertation; Master's; Monographic	Hutton, Robert A		39.7573	-119.684	0.001	27	28.07	29.13	FLUOR	IGNEOUS	VOLCANIC	FELSIC	TUFF
B-2a		NAVDAT		Geology and uranium content of middle Tertiary ash-flow tuffs in thenorthern part of Dogskin Mountain, Nevada	Thesis or dissertation; Master's; Monographic	Hutton, Robert A		39.7573	-119.684	0.001	27	28.07	29.13	XRF	IGNEOUS	VOLCANIC	FELSIC	TUFF		63.6	0.48	14.2		3.19						0.258	1.45		3.75	4.45	0.05
150		NAVDAT		Ages of igneous rocks in the South Park-Breckenridge region, Colorado, and their relation to the tectonic history of the Front-Range uplift	U. S. Geological Survey Professional Paper, Report: P 1199 A-E, 1981	Anonymous		39.2575	-105.826	0.0001	54.4	66.4	78.4	RAPID_ROCK	IGNEOUS	VOLCANIC	FELSIC	TUFF		67	0.47	14.6		1.7		1.4			0.08	1.6	4.5		2.4	1.9	0.33				1.5	2.8
444		NAVDAT		Ages of igneous rocks in the South Park-Breckenridge region, Colorado, and their relation to the tectonic history of the Front-Range uplift	U. S. Geological Survey Professional Paper, Report: P 1199 A-E, 1981	Anonymous		39.1494	-105.815	0.0001	51.2	59.3	67.4	SPEC	IGNEOUS	VOLCANIC	FELSIC	TUFF																											540		5.7	5.7
444		NAVDAT		Ages of igneous rocks in the South Park-Breckenridge region, Colorado, and their relation to the tectonic history of the Front-Range uplift	U. S. Geological Survey Professional Paper, Report: P 1199 A-E, 1981	Anonymous		39.1494	-105.815	0.0001	51.2	59.3	67.4	RAPID_ROCK	IGNEOUS	VOLCANIC	FELSIC	TUFF		66.3	0.39	15.5		3.4		1.6			0.06	1.5	3.8		2.8	1.3	0.18				2.4	2
D1750		NAVDAT		Geology of the Rockland and Arbon quadrangles, Power County, Idaho	U. S. Geological Survey Bulletin, Report: B 1399, 104 pp., 1976	Trimble, Donald E; Carr, Wilfred J		42.6922	-112.963	0.001	5.8	6.4	7.1	SPEC	IGNEOUS	VOLCANIC	FELSIC	TUFF		73.49	0.27	11.88		0.67		0.8			0.04	0.16	0.6		2.76	5.81	0.03				0.11	2.73						< 2	< 1	2
H3274		NAVDAT		Geology of the Rockland and Arbon quadrangles, Power County, Idaho	U. S. Geological Survey Bulletin, Report: B 1399, 104 pp., 1976	Trimble, Donald E; Carr, Wilfred J		42.6449	-112.903	0.01	5.8	6.4	7.1	SPEC	IGNEOUS	VOLCANIC	FELSIC	TUFF		72.92	0.22	12.27		1.25		0.18			0.04	0.22	0.6		2.66	5.57	0.02				0.49	3.06						15	< 2	6
SGD 1		NAVDAT		Tertiary volcanic history of the Sierra del Gallego area, Chihuahua, Mexico	Geological Society of America Bulletin, vol.93, no.4, pp.303-314, Apr 1982	Keller, Peter C; Bockoven, Neil T; McDowell, Fred W		29.5903	-105.997	0.0001	44	44.8	45.6	XRF	IGNEOUS	VOLCANIC	FELSIC	TUFF		82.24	0.15	9.2		0.85		0.05			0.01	0.04	0.29		1.89	5.53	0.05					0.05
622		NAVDAT		Geology of the Deadwood-Sawmill Creek area, Custer County, Idaho	Thesis or dissertation; Master's; Monographic	Albers, Doyle Francis		44.3489	-114.834	0.001	43	46	49	SPEC	IGNEOUS	VOLCANIC	FELSIC	TUFF																											100	0	0	5
1-28-X2		NAVDAT		Nonmarine sedimentary rocks of Tertiary age in the Lake Mead region, southeastern Nevada and northwestern Arizona.	U. S. Geological Survey Professional Paper. 1984.	Bohannon-Robert-G		36.5153	-114.482	0.0001	11.6	12.5	13.4	UNKNOWN	IGNEOUS	VOLCANIC	FELSIC	TUFF
s_UA 452		NAVDAT		Distribution, stratigraphy, petrochemistry, and palaeomagnetism of the late Pleistocene Old Crow tephra in Alaska and the Yukon.	Canadian Journal of Earth Sciences = Journal Canadien des Sciences de la Terre. 22; 6, Pages 893-906. 1985.	Westgate-J-A; Walter-R-C; Pearce-G-W; Gorton-M-P		61	-142	0.1	0.06	0.09	0.12	INAA	IGNEOUS	VOLCANIC	FELSIC	TUFF
s_UA 459		NAVDAT		Distribution, stratigraphy, petrochemistry, and palaeomagnetism of the late Pleistocene Old Crow tephra in Alaska and the Yukon.	Canadian Journal of Earth Sciences = Journal Canadien des Sciences de la Terre. 22; 6, Pages 893-906. 1985.	Westgate-J-A; Walter-R-C; Pearce-G-W; Gorton-M-P		61	-142	0.1	0.06	0.09	0.12	INAA	IGNEOUS	VOLCANIC	FELSIC	TUFF
s_UT 40		NAVDAT		Distribution, stratigraphy, petrochemistry, and palaeomagnetism of the late Pleistocene Old Crow tephra in Alaska and the Yukon.	Canadian Journal of Earth Sciences = Journal Canadien des Sciences de la Terre. 22; 6, Pages 893-906. 1985.	Westgate-J-A; Walter-R-C; Pearce-G-W; Gorton-M-P		62.525	-140.95	0.1	0.06	0.09	0.12	INAA	IGNEOUS	VOLCANIC	FELSIC	TUFF
s_UT 81		NAVDAT		Distribution, stratigraphy, petrochemistry, and palaeomagnetism of the late Pleistocene Old Crow tephra in Alaska and the Yukon.	Canadian Journal of Earth Sciences = Journal Canadien des Sciences de la Terre. 22; 6, Pages 893-906. 1985.	Westgate-J-A; Walter-R-C; Pearce-G-W; Gorton-M-P		62.75	-137.5	0.1	0.06	0.09	0.12	INAA	IGNEOUS	VOLCANIC	FELSIC	TUFF
TP1		NAVDAT		The geology and petrology of Three Fingered Jack, a High Cascade volcano in central Oregon	Thesis or dissertation; Map; Master's; Monographic	Davie, Ellen Ingraham, II		44.4782	-121.845	0.01	0.2	0.45	0.69	AAS	IGNEOUS	VOLCANIC	FELSIC	TUFF		49.38	1.04	17.26		5.25					0.12	4.02	7.23		2.15	0.82	0.17				2.8	6.33						72	52	63
TP1		NAVDAT		The geology and petrology of Three Fingered Jack, a High Cascade volcano in central Oregon	Thesis or dissertation; Map; Master's; Monographic	Davie, Ellen Ingraham, II		44.4782	-121.845	0.01	0.2	0.45	0.69	TIT	IGNEOUS	VOLCANIC	FELSIC	TUFF								2.33
TP1		NAVDAT		The geology and petrology of Three Fingered Jack, a High Cascade volcano in central Oregon	Thesis or dissertation; Map; Master's; Monographic	Davie, Ellen Ingraham, II		44.4782	-121.845	0.01	0.2	0.45	0.69	XRF	IGNEOUS	VOLCANIC	FELSIC	TUFF
[NO NAME]		NAVDAT		Rhyolite intrusions and associated mineral deposits in the Challisvolcanic field, Challis Quadrangle	U. S. Geological Survey Bulletin, Report: B 1658 A-S, pp.167-179,1985	Hardyman, R F; Fisher, Frederick S		44.5	-114.75	1	45	46	48	XRF	IGNEOUS	VOLCANIC	FELSIC	TUFF		75.33	0.13	12.08		1.43		0.18			0.01	0.08	0.26		3.08	5.1	0				0.47	0.51
PZ-23		NAVDAT		Geochemistry of quartz-normative igneous rocks from the Chinati Mountains and Terlingua areas, West Texas; a comparison with Cenozoic volcanic rocks from Chihuahua and Baja California Sur, Mexico.	Guidebook - Bureau of Economic Geology, University of Texas at Austin. 23; Pages 143-163. 1986. .	Cameron-Kenneth-L; Cameron-Maryellen		29	-104	0.1	26	30.5	38	XRF	IGNEOUS	VOLCANIC	FELSIC	TUFF		69.34	0.59	15.5		0.45		2.26			0.1	0.72	1.62		4.35	4.89	0.17		3.09
PZ-23		NAVDAT		Geochemistry of quartz-normative igneous rocks from the Chinati Mountains and Terlingua areas, West Texas; a comparison with Cenozoic volcanic rocks from Chihuahua and Baja California Sur, Mexico.	Guidebook - Bureau of Economic Geology, University of Texas at Austin. 23; Pages 143-163. 1986. .	Cameron-Kenneth-L; Cameron-Maryellen		29	-104	0.1	26	30.5	38	MS-ID	IGNEOUS	VOLCANIC	FELSIC	TUFF
SA?102		NAVDAT		Geochemistry of quartz-normative igneous rocks from the Chinati Mountains and Terlingua areas, West Texas; a comparison with Cenozoic volcanic rocks from Chihuahua and Baja California Sur, Mexico.	Guidebook - Bureau of Economic Geology, University of Texas at Austin. 23; Pages 143-163. 1986. .	Cameron-Kenneth-L; Cameron-Maryellen		29	-103.833	0.01	26	33.5	38	XRF	IGNEOUS	VOLCANIC	FELSIC	TUFF		71.93	0.39	14.4		0.17		1.45			0.05	0.29	0.86		3.94	6.46	0.06		1.52
SA?102		NAVDAT		Geochemistry of quartz-normative igneous rocks from the Chinati Mountains and Terlingua areas, West Texas; a comparison with Cenozoic volcanic rocks from Chihuahua and Baja California Sur, Mexico.	Guidebook - Bureau of Economic Geology, University of Texas at Austin. 23; Pages 143-163. 1986. .	Cameron-Kenneth-L; Cameron-Maryellen		29	-103.833	0.01	26	33.5	38	MS-ID	IGNEOUS	VOLCANIC	FELSIC	TUFF																												3
SA?40		NAVDAT		Geochemistry of quartz-normative igneous rocks from the Chinati Mountains and Terlingua areas, West Texas; a comparison with Cenozoic volcanic rocks from Chihuahua and Baja California Sur, Mexico.	Guidebook - Bureau of Economic Geology, University of Texas at Austin. 23; Pages 143-163. 1986. .	Cameron-Kenneth-L; Cameron-Maryellen		29	-103.833	0.01	26	33.5	38	XRF	IGNEOUS	VOLCANIC	FELSIC	TUFF		74.42	0.42	12.77		0.19		1.6			0.03	0.13	1.05		3.45	5.86	0.07		1.49
SA?40		NAVDAT		Geochemistry of quartz-normative igneous rocks from the Chinati Mountains and Terlingua areas, West Texas; a comparison with Cenozoic volcanic rocks from Chihuahua and Baja California Sur, Mexico.	Guidebook - Bureau of Economic Geology, University of Texas at Austin. 23; Pages 143-163. 1986. .	Cameron-Kenneth-L; Cameron-Maryellen		29	-103.833	0.01	26	33.5	38	MS-ID	IGNEOUS	VOLCANIC	FELSIC	TUFF																												2
PZ?98		NAVDAT		Geochemistry of quartz-normative igneous rocks from the Chinati Mountains and Terlingua areas, West Texas; a comparison with Cenozoic volcanic rocks from Chihuahua and Baja California Sur, Mexico.	Guidebook - Bureau of Economic Geology, University of Texas at Austin. 23; Pages 143-163. 1986. .	Cameron-Kenneth-L; Cameron-Maryellen		28.4166	-104.667	0.01	26	33.7	38	XRF	IGNEOUS	VOLCANIC	FELSIC	TUFF		65.89	0.8	16.49		0.72		3.62			0.1	0.36	2.01		4.67	5.08	0.27		0.81
PZ?98		NAVDAT		Geochemistry of quartz-normative igneous rocks from the Chinati Mountains and Terlingua areas, West Texas; a comparison with Cenozoic volcanic rocks from Chihuahua and Baja California Sur, Mexico.	Guidebook - Bureau of Economic Geology, University of Texas at Austin. 23; Pages 143-163. 1986. .	Cameron-Kenneth-L; Cameron-Maryellen		28.4166	-104.667	0.01	26	33.7	38	MS-ID	IGNEOUS	VOLCANIC	FELSIC	TUFF
PZ?127		NAVDAT		Geochemistry of quartz-normative igneous rocks from the Chinati Mountains and Terlingua areas, West Texas; a comparison with Cenozoic volcanic rocks from Chihuahua and Baja California Sur, Mexico.	Guidebook - Bureau of Economic Geology, University of Texas at Austin. 23; Pages 143-163. 1986. .	Cameron-Kenneth-L; Cameron-Maryellen		28.4166	-104.667	0.01	26	33.7	38	XRF	IGNEOUS	VOLCANIC	FELSIC	TUFF		66.64	0.62	15.82		0.62		3.12			0.13	0.74	2.51		4.07	5.56	0.17		1.03
PZ?127		NAVDAT		Geochemistry of quartz-normative igneous rocks from the Chinati Mountains and Terlingua areas, West Texas; a comparison with Cenozoic volcanic rocks from Chihuahua and Baja California Sur, Mexico.	Guidebook - Bureau of Economic Geology, University of Texas at Austin. 23; Pages 143-163. 1986. .	Cameron-Kenneth-L; Cameron-Maryellen		28.4166	-104.667	0.01	26	33.7	38	MS-ID	IGNEOUS	VOLCANIC	FELSIC	TUFF
PZ-26		NAVDAT		Geochemistry of quartz-normative igneous rocks from the Chinati Mountains and Terlingua areas, West Texas; a comparison with Cenozoic volcanic rocks from Chihuahua and Baja California Sur, Mexico.	Guidebook - Bureau of Economic Geology, University of Texas at Austin. 23; Pages 143-163. 1986. .	Cameron-Kenneth-L; Cameron-Maryellen		28.4166	-104.667	0.01	26	33.7	38	XRF	IGNEOUS	VOLCANIC	FELSIC	TUFF		69.38	0.52	15.34		0.53		2.66			0.07	0.32	1.3		4.08	5.62	0.17		1.18
PZ-26		NAVDAT		Geochemistry of quartz-normative igneous rocks from the Chinati Mountains and Terlingua areas, West Texas; a comparison with Cenozoic volcanic rocks from Chihuahua and Baja California Sur, Mexico.	Guidebook - Bureau of Economic Geology, University of Texas at Austin. 23; Pages 143-163. 1986. .	Cameron-Kenneth-L; Cameron-Maryellen		28.4166	-104.667	0.01	26	33.7	38	MS-ID	IGNEOUS	VOLCANIC	FELSIC	TUFF
PZ?125		NAVDAT		Geochemistry of quartz-normative igneous rocks from the Chinati Mountains and Terlingua areas, West Texas; a comparison with Cenozoic volcanic rocks from Chihuahua and Baja California Sur, Mexico.	Guidebook - Bureau of Economic Geology, University of Texas at Austin. 23; Pages 143-163. 1986. .	Cameron-Kenneth-L; Cameron-Maryellen		28.4166	-104.667	0.01	26	33.7	38	XRF	IGNEOUS	VOLCANIC	FELSIC	TUFF		70.78	0.44	14.65		0.45		2.24			0.08	0.52	1.34		3.99	5.38	0.12		0.8
PZ?125		NAVDAT		Geochemistry of quartz-normative igneous rocks from the Chinati Mountains and Terlingua areas, West Texas; a comparison with Cenozoic volcanic rocks from Chihuahua and Baja California Sur, Mexico.	Guidebook - Bureau of Economic Geology, University of Texas at Austin. 23; Pages 143-163. 1986. .	Cameron-Kenneth-L; Cameron-Maryellen		28.4166	-104.667	0.01	26	33.7	38	MS-ID	IGNEOUS	VOLCANIC	FELSIC	TUFF
M331		NAVDAT		Geochemistry of quartz-normative igneous rocks from the Chinati Mountains and Terlingua areas, West Texas; a comparison with Cenozoic volcanic rocks from Chihuahua and Baja California Sur, Mexico.	Guidebook - Bureau of Economic Geology, University of Texas at Austin. 23; Pages 143-163. 1986. .	Cameron-Kenneth-L; Cameron-Maryellen		28.8333	-104	0.01	26	29.8	38	XRF	IGNEOUS	VOLCANIC	FELSIC	TUFF		73.67	0.29	13.31		0.28		1.42			0.04	0.21	1.04		3.37	6.28	0.09		0.89
M331		NAVDAT		Geochemistry of quartz-normative igneous rocks from the Chinati Mountains and Terlingua areas, West Texas; a comparison with Cenozoic volcanic rocks from Chihuahua and Baja California Sur, Mexico.	Guidebook - Bureau of Economic Geology, University of Texas at Austin. 23; Pages 143-163. 1986. .	Cameron-Kenneth-L; Cameron-Maryellen		28.8333	-104	0.01	26	29.8	38	MS-ID	IGNEOUS	VOLCANIC	FELSIC	TUFF
M327		NAVDAT		Geochemistry of quartz-normative igneous rocks from the Chinati Mountains and Terlingua areas, West Texas; a comparison with Cenozoic volcanic rocks from Chihuahua and Baja California Sur, Mexico.	Guidebook - Bureau of Economic Geology, University of Texas at Austin. 23; Pages 143-163. 1986. .	Cameron-Kenneth-L; Cameron-Maryellen		28.8333	-104	0.01	26	29.8	38	XRF	IGNEOUS	VOLCANIC	FELSIC	TUFF		74.39	0.27	13.27		0.29		1.45			0.05	0.33	0.75		3.09	6.06	0.03		1.36
M327		NAVDAT		Geochemistry of quartz-normative igneous rocks from the Chinati Mountains and Terlingua areas, West Texas; a comparison with Cenozoic volcanic rocks from Chihuahua and Baja California Sur, Mexico.	Guidebook - Bureau of Economic Geology, University of Texas at Austin. 23; Pages 143-163. 1986. .	Cameron-Kenneth-L; Cameron-Maryellen		28.8333	-104	0.01	26	29.8	38	MS-ID	IGNEOUS	VOLCANIC	FELSIC	TUFF
PZ?61		NAVDAT		Geochemistry of quartz-normative igneous rocks from the Chinati Mountains and Terlingua areas, West Texas; a comparison with Cenozoic volcanic rocks from Chihuahua and Baja California Sur, Mexico.	Guidebook - Bureau of Economic Geology, University of Texas at Austin. 23; Pages 143-163. 1986. .	Cameron-Kenneth-L; Cameron-Maryellen		28.8333	-104	0.01	26	29.8	38	XRF	IGNEOUS	VOLCANIC	FELSIC	TUFF		74.37	0.26	13.15		0.29		1.44			0.05	0.27	0.97		3.71	5.42	0.08		0.56
PZ?61		NAVDAT		Geochemistry of quartz-normative igneous rocks from the Chinati Mountains and Terlingua areas, West Texas; a comparison with Cenozoic volcanic rocks from Chihuahua and Baja California Sur, Mexico.	Guidebook - Bureau of Economic Geology, University of Texas at Austin. 23; Pages 143-163. 1986. .	Cameron-Kenneth-L; Cameron-Maryellen		28.8333	-104	0.01	26	29.8	38	MS-ID	IGNEOUS	VOLCANIC	FELSIC	TUFF
PZ?93		NAVDAT		Geochemistry of quartz-normative igneous rocks from the Chinati Mountains and Terlingua areas, West Texas; a comparison with Cenozoic volcanic rocks from Chihuahua and Baja California Sur, Mexico.	Guidebook - Bureau of Economic Geology, University of Texas at Austin. 23; Pages 143-163. 1986. .	Cameron-Kenneth-L; Cameron-Maryellen		28.8333	-104	0.01	26	29.8	38	XRF	IGNEOUS	VOLCANIC	FELSIC	TUFF		74.7	0.26	13		0.28		1.4			0.03	0.31	0.94		3.45	5.56	0.06		1.26
PZ?93		NAVDAT		Geochemistry of quartz-normative igneous rocks from the Chinati Mountains and Terlingua areas, West Texas; a comparison with Cenozoic volcanic rocks from Chihuahua and Baja California Sur, Mexico.	Guidebook - Bureau of Economic Geology, University of Texas at Austin. 23; Pages 143-163. 1986. .	Cameron-Kenneth-L; Cameron-Maryellen		28.8333	-104	0.01	26	29.8	38	MS-ID	IGNEOUS	VOLCANIC	FELSIC	TUFF
M326		NAVDAT		Geochemistry of quartz-normative igneous rocks from the Chinati Mountains and Terlingua areas, West Texas; a comparison with Cenozoic volcanic rocks from Chihuahua and Baja California Sur, Mexico.	Guidebook - Bureau of Economic Geology, University of Texas at Austin. 23; Pages 143-163. 1986. .	Cameron-Kenneth-L; Cameron-Maryellen		28.8333	-104	0.01	26	29.8	38	XRF	IGNEOUS	VOLCANIC	FELSIC	TUFF		74.69	0.23	12.92		0.25		1.26			0.05	0.11	1.17		3.54	5.74	0.04		0.9
M326		NAVDAT		Geochemistry of quartz-normative igneous rocks from the Chinati Mountains and Terlingua areas, West Texas; a comparison with Cenozoic volcanic rocks from Chihuahua and Baja California Sur, Mexico.	Guidebook - Bureau of Economic Geology, University of Texas at Austin. 23; Pages 143-163. 1986. .	Cameron-Kenneth-L; Cameron-Maryellen		28.8333	-104	0.01	26	29.8	38	MS-ID	IGNEOUS	VOLCANIC	FELSIC	TUFF
PZ?77		NAVDAT		Geochemistry of quartz-normative igneous rocks from the Chinati Mountains and Terlingua areas, West Texas; a comparison with Cenozoic volcanic rocks from Chihuahua and Baja California Sur, Mexico.	Guidebook - Bureau of Economic Geology, University of Texas at Austin. 23; Pages 143-163. 1986. .	Cameron-Kenneth-L; Cameron-Maryellen		28.8333	-104	0.01	26	29.8	38	XRF	IGNEOUS	VOLCANIC	FELSIC	TUFF		75.38	0.22	12.7		0.25		1.25			0.05	0.29	0.83		3.63	5.32	0.08		0.6
PZ?77		NAVDAT		Geochemistry of quartz-normative igneous rocks from the Chinati Mountains and Terlingua areas, West Texas; a comparison with Cenozoic volcanic rocks from Chihuahua and Baja California Sur, Mexico.	Guidebook - Bureau of Economic Geology, University of Texas at Austin. 23; Pages 143-163. 1986. .	Cameron-Kenneth-L; Cameron-Maryellen		28.8333	-104	0.01	26	29.8	38	MS-ID	IGNEOUS	VOLCANIC	FELSIC	TUFF
PZ?92		NAVDAT		Geochemistry of quartz-normative igneous rocks from the Chinati Mountains and Terlingua areas, West Texas; a comparison with Cenozoic volcanic rocks from Chihuahua and Baja California Sur, Mexico.	Guidebook - Bureau of Economic Geology, University of Texas at Austin. 23; Pages 143-163. 1986. .	Cameron-Kenneth-L; Cameron-Maryellen		28.8333	-104	0.01	26	29.8	38	XRF	IGNEOUS	VOLCANIC	FELSIC	TUFF		76.2	0.21	12.52		0.24		1.2			0.04	0.8	0.63		2.44	5.66	0.05		3.55
PZ?92		NAVDAT		Geochemistry of quartz-normative igneous rocks from the Chinati Mountains and Terlingua areas, West Texas; a comparison with Cenozoic volcanic rocks from Chihuahua and Baja California Sur, Mexico.	Guidebook - Bureau of Economic Geology, University of Texas at Austin. 23; Pages 143-163. 1986. .	Cameron-Kenneth-L; Cameron-Maryellen		28.8333	-104	0.01	26	29.8	38	MS-ID	IGNEOUS	VOLCANIC	FELSIC	TUFF
PZ?52		NAVDAT		Geochemistry of quartz-normative igneous rocks from the Chinati Mountains and Terlingua areas, West Texas; a comparison with Cenozoic volcanic rocks from Chihuahua and Baja California Sur, Mexico.	Guidebook - Bureau of Economic Geology, University of Texas at Austin. 23; Pages 143-163. 1986. .	Cameron-Kenneth-L; Cameron-Maryellen		28.8333	-104	0.01	26	29.8	38	XRF	IGNEOUS	VOLCANIC	FELSIC	TUFF		78.96	0.23	9.48		0.26		1.32			0.1	0.26	1.54		3.32	4.47	0.07		2.65
PZ?52		NAVDAT		Geochemistry of quartz-normative igneous rocks from the Chinati Mountains and Terlingua areas, West Texas; a comparison with Cenozoic volcanic rocks from Chihuahua and Baja California Sur, Mexico.	Guidebook - Bureau of Economic Geology, University of Texas at Austin. 23; Pages 143-163. 1986. .	Cameron-Kenneth-L; Cameron-Maryellen		28.8333	-104	0.01	26	29.8	38	MS-ID	IGNEOUS	VOLCANIC	FELSIC	TUFF
PZ?94		NAVDAT		Geochemistry of quartz-normative igneous rocks from the Chinati Mountains and Terlingua areas, West Texas; a comparison with Cenozoic volcanic rocks from Chihuahua and Baja California Sur, Mexico.	Guidebook - Bureau of Economic Geology, University of Texas at Austin. 23; Pages 143-163. 1986. .	Cameron-Kenneth-L; Cameron-Maryellen		28.8333	-104	0.01	26	29.8	38	XRF	IGNEOUS	VOLCANIC	FELSIC	TUFF		73.44	0.31	13.54		0.3		1.52			0.04	0.22	0.93		3.54	6.07	0.08		1.89
PZ?94		NAVDAT		Geochemistry of quartz-normative igneous rocks from the Chinati Mountains and Terlingua areas, West Texas; a comparison with Cenozoic volcanic rocks from Chihuahua and Baja California Sur, Mexico.	Guidebook - Bureau of Economic Geology, University of Texas at Austin. 23; Pages 143-163. 1986. .	Cameron-Kenneth-L; Cameron-Maryellen		28.8333	-104	0.01	26	29.8	38	MS-ID	IGNEOUS	VOLCANIC	FELSIC	TUFF
PZ?94gI		NAVDAT		Geochemistry of quartz-normative igneous rocks from the Chinati Mountains and Terlingua areas, West Texas; a comparison with Cenozoic volcanic rocks from Chihuahua and Baja California Sur, Mexico.	Guidebook - Bureau of Economic Geology, University of Texas at Austin. 23; Pages 143-163. 1986. .	Cameron-Kenneth-L; Cameron-Maryellen		28.8333	-104	0.01	26	29.8	38	MS-ID	IGNEOUS	VOLCANIC	FELSIC	TUFF
PZ-94fs		NAVDAT		Geochemistry of quartz-normative igneous rocks from the Chinati Mountains and Terlingua areas, West Texas; a comparison with Cenozoic volcanic rocks from Chihuahua and Baja California Sur, Mexico.	Guidebook - Bureau of Economic Geology, University of Texas at Austin. 23; Pages 143-163. 1986. .	Cameron-Kenneth-L; Cameron-Maryellen		28.8333	-104	0.01	26	29.8	38	MS-ID	IGNEOUS	VOLCANIC	FELSIC	TUFF
PZ?94hb		NAVDAT		Geochemistry of quartz-normative igneous rocks from the Chinati Mountains and Terlingua areas, West Texas; a comparison with Cenozoic volcanic rocks from Chihuahua and Baja California Sur, Mexico.	Guidebook - Bureau of Economic Geology, University of Texas at Austin. 23; Pages 143-163. 1986. .	Cameron-Kenneth-L; Cameron-Maryellen		28.8333	-104	0.01	26	29.8	38	MS-ID	IGNEOUS	VOLCANIC	FELSIC	TUFF
L80-30		NAVDAT		K-Ar ages of volcanic rocks from the Magic Reservoir eruptive center, Snake River plain, Idaho	Isochron/West, vol.46, pp.15-17, Aug 1986	Honjo, Norio; McElwee, Kris R; Duncan, Robert A; Leeman, William P		43.2736	-114.006	0.001	8.86	8.98	9.1	UNKNOWN	IGNEOUS	VOLCANIC	FELSIC	TUFF		70	0.57	12.61			3.98				0.05	0.42	1.65		2.64	5.31	0.1		1.9
L80-78		NAVDAT		K-Ar ages of volcanic rocks from the Magic Reservoir eruptive center, Snake River plain, Idaho	Isochron/West, vol.46, pp.15-17, Aug 1986	Honjo, Norio; McElwee, Kris R; Duncan, Robert A; Leeman, William P		43.1208	-114.59	0.001	9.02	9.15	9.28	UNKNOWN	IGNEOUS	VOLCANIC	FELSIC	TUFF		68.4	0.77	13.12			4.54				0.07	0.76	2.29		2.96	4.68	0.17		1.88
L80-57A		NAVDAT		K-Ar ages of volcanic rocks from the Magic Reservoir eruptive center, Snake River plain, Idaho	Isochron/West, vol.46, pp.15-17, Aug 1986	Honjo, Norio; McElwee, Kris R; Duncan, Robert A; Leeman, William P		43.3375	-114.401	0.001	12.88	13.03	13.18	UNKNOWN	IGNEOUS	VOLCANIC	FELSIC	TUFF		74.5	0.26	12.62			2.24				0.04	0.17	0.78		3.27	5.43	0.02
L80-66		NAVDAT		Petrology and geochemistry of the Magic Reservoir eruptive center,Snake River plain, Idaho	Thesis or dissertation; Master's; Monographic	Honjo, Norio		43.22	-114.7	0.1	8.7	9	9.3	XRF	IGNEOUS	VOLCANIC	FELSIC	TUFF																														10
L80-85		NAVDAT		Petrology and geochemistry of the Magic Reservoir eruptive center,Snake River plain, Idaho	Thesis or dissertation; Master's; Monographic	Honjo, Norio		43.25	-114.5	1	8.7	9	9.3	TIMS	IGNEOUS	VOLCANIC	FELSIC	TUFF
797-19C		NAVDAT		Petrogenesis, geochronology, and hydrothermal systems of the northern Idaho Batholith and adjacent areas based on (super 18?O/ (super 16?O, D/H, (super 87?Sr/ (super 86?Sr, K-Ar, and (super 40?Ar/ (super 39?Ar studies	U. S. Geological Survey Professional Paper, Report: P 1436, pp.95-137, 1987	Criss, Robert E; Fleck, Robert J		45.6917	-114.482	0.001	48.3	48.9	49.5	TIMS	IGNEOUS	VOLCANIC	FELSIC	TUFF
797-19C		NAVDAT		Petrogenesis, geochronology, and hydrothermal systems of the northern Idaho Batholith and adjacent areas based on (super 18?O/ (super 16?O, D/H, (super 87?Sr/ (super 86?Sr, K-Ar, and (super 40?Ar/ (super 39?Ar studies	U. S. Geological Survey Professional Paper, Report: P 1436, pp.95-137, 1987	Criss, Robert E; Fleck, Robert J		45.6917	-114.482	0.001	48.3	48.9	49.5	XRF	IGNEOUS	VOLCANIC	FELSIC	TUFF
L80-28		NAVDAT		Petrology and geochemistry of the Magic Reservoir eruptive center,Snake River plain, Idaho	Thesis or dissertation; Master's; Monographic	Honjo, Norio		43.25	-114.75	1	8.7	9	9.3	ICP	IGNEOUS	VOLCANIC	FELSIC	TUFF		77.37	0.26	12.19			1.03						0.39		3.09	5.48	0.02												2	3
L80-28		NAVDAT		Petrology and geochemistry of the Magic Reservoir eruptive center,Snake River plain, Idaho	Thesis or dissertation; Master's; Monographic	Honjo, Norio		43.25	-114.75	1	8.7	9	9.3	XRF	IGNEOUS	VOLCANIC	FELSIC	TUFF																														5
L80-30		NAVDAT		Petrology and geochemistry of the Magic Reservoir eruptive center,Snake River plain, Idaho	Thesis or dissertation; Master's; Monographic	Honjo, Norio		43.2736	-114.006	0.01	8.86	8.98	9.1	ICP	IGNEOUS	VOLCANIC	FELSIC	TUFF		70.6	0.56	12.9			4				0.05	0.39	1.64		2.75	5.1	0.1											2	7	5
L80-30		NAVDAT		Petrology and geochemistry of the Magic Reservoir eruptive center,Snake River plain, Idaho	Thesis or dissertation; Master's; Monographic	Honjo, Norio		43.2736	-114.006	0.01	8.86	8.98	9.1	XRF	IGNEOUS	VOLCANIC	FELSIC	TUFF																														8
L80-64		NAVDAT		Petrology and geochemistry of the Magic Reservoir eruptive center,Snake River plain, Idaho	Thesis or dissertation; Master's; Monographic	Honjo, Norio		43.22	-114.7	0.1	8.7	9	9.3	ICP	IGNEOUS	VOLCANIC	FELSIC	TUFF		71.46	0.6	12.82			3.82				0.05	0.04	1.85		2.58	5.02	0.11											2	7	5
L80-64		NAVDAT		Petrology and geochemistry of the Magic Reservoir eruptive center,Snake River plain, Idaho	Thesis or dissertation; Master's; Monographic	Honjo, Norio		43.22	-114.7	0.1	8.7	9	9.3	TIMS	IGNEOUS	VOLCANIC	FELSIC	TUFF
L80-64		NAVDAT		Petrology and geochemistry of the Magic Reservoir eruptive center,Snake River plain, Idaho	Thesis or dissertation; Master's; Monographic	Honjo, Norio		43.22	-114.7	0.1	8.7	9	9.3	NAA	IGNEOUS	VOLCANIC	FELSIC	TUFF						3.65									2.65														3.81
L80-64		NAVDAT		Petrology and geochemistry of the Magic Reservoir eruptive center,Snake River plain, Idaho	Thesis or dissertation; Master's; Monographic	Honjo, Norio		43.22	-114.7	0.1	8.7	9	9.3	XRF	IGNEOUS	VOLCANIC	FELSIC	TUFF																														7
L80-66		NAVDAT		Petrology and geochemistry of the Magic Reservoir eruptive center,Snake River plain, Idaho	Thesis or dissertation; Master's; Monographic	Honjo, Norio		43.22	-114.7	0.1	8.7	9	9.3	ICP	IGNEOUS	VOLCANIC	FELSIC	TUFF		72.69	0.54	13.26			3.56				0.03	0.11	0.91		2.95	4.61	0.09											1	7	7
L80-78		NAVDAT		Petrology and geochemistry of the Magic Reservoir eruptive center,Snake River plain, Idaho	Thesis or dissertation; Master's; Monographic	Honjo, Norio		43.1208	-114.59	0.01	9.02	9.15	9.28	ICP	IGNEOUS	VOLCANIC	FELSIC	TUFF		69.73	0.73	13.31			4.57				0.07	0.82	2.3		3.16	4.61	0.16											5	11	11
L80-78		NAVDAT		Petrology and geochemistry of the Magic Reservoir eruptive center,Snake River plain, Idaho	Thesis or dissertation; Master's; Monographic	Honjo, Norio		43.1208	-114.59	0.01	9.02	9.15	9.28	TIMS	IGNEOUS	VOLCANIC	FELSIC	TUFF
L80-78		NAVDAT		Petrology and geochemistry of the Magic Reservoir eruptive center,Snake River plain, Idaho	Thesis or dissertation; Master's; Monographic	Honjo, Norio		43.1208	-114.59	0.01	9.02	9.15	9.28	NAA	IGNEOUS	VOLCANIC	FELSIC	TUFF						4.61									3.11														6.5
L80-78		NAVDAT		Petrology and geochemistry of the Magic Reservoir eruptive center,Snake River plain, Idaho	Thesis or dissertation; Master's; Monographic	Honjo, Norio		43.1208	-114.59	0.01	9.02	9.15	9.28	XRF	IGNEOUS	VOLCANIC	FELSIC	TUFF																														11
L80-85		NAVDAT		Petrology and geochemistry of the Magic Reservoir eruptive center,Snake River plain, Idaho	Thesis or dissertation; Master's; Monographic	Honjo, Norio		43.25	-114.5	1	8.7	9	9.3	ICP	IGNEOUS	VOLCANIC	FELSIC	TUFF		71.17	0.55	12.02			4.3				0.07	0.33	1.6		2.74	5.17	0.1												7	3
L80-85		NAVDAT		Petrology and geochemistry of the Magic Reservoir eruptive center,Snake River plain, Idaho	Thesis or dissertation; Master's; Monographic	Honjo, Norio		43.25	-114.5	1	8.7	9	9.3	NAA	IGNEOUS	VOLCANIC	FELSIC	TUFF						4.35									2.72														2.91
L80-85		NAVDAT		Petrology and geochemistry of the Magic Reservoir eruptive center,Snake River plain, Idaho	Thesis or dissertation; Master's; Monographic	Honjo, Norio		43.25	-114.5	1	8.7	9	9.3	XRF	IGNEOUS	VOLCANIC	FELSIC	TUFF																														7
L80-89B		NAVDAT		Petrology and geochemistry of the Magic Reservoir eruptive center,Snake River plain, Idaho	Thesis or dissertation; Master's; Monographic	Honjo, Norio		43.25	-114.5	1	8.7	9	9.3	ICP	IGNEOUS	VOLCANIC	FELSIC	TUFF		71.1	0.52	12.09			4.02				0.07	0.32	1.64		3	4.75	0.07											1	6	4
L80-89B		NAVDAT		Petrology and geochemistry of the Magic Reservoir eruptive center,Snake River plain, Idaho	Thesis or dissertation; Master's; Monographic	Honjo, Norio		43.25	-114.5	1	8.7	9	9.3	XRF	IGNEOUS	VOLCANIC	FELSIC	TUFF																														9
L80-57A		NAVDAT		Petrology and geochemistry of the Magic Reservoir eruptive center,Snake River plain, Idaho	Thesis or dissertation; Master's; Monographic	Honjo, Norio		43.3375	-114.401	0.01	5.04	5.6	6.16	ICP	IGNEOUS	VOLCANIC	FELSIC	TUFF		74.34	0.24	12.44			2.1				0.04	0.16	0.75		3.4	5.42	0.02											1	2	4
L80-57A		NAVDAT		Petrology and geochemistry of the Magic Reservoir eruptive center,Snake River plain, Idaho	Thesis or dissertation; Master's; Monographic	Honjo, Norio		43.3375	-114.401	0.01	5.04	5.6	6.16	TIMS	IGNEOUS	VOLCANIC	FELSIC	TUFF
L80-57A		NAVDAT		Petrology and geochemistry of the Magic Reservoir eruptive center,Snake River plain, Idaho	Thesis or dissertation; Master's; Monographic	Honjo, Norio		43.3375	-114.401	0.01	5.04	5.6	6.16	NAA	IGNEOUS	VOLCANIC	FELSIC	TUFF						2.18																							1.52
L80-57A		NAVDAT		Petrology and geochemistry of the Magic Reservoir eruptive center,Snake River plain, Idaho	Thesis or dissertation; Master's; Monographic	Honjo, Norio		43.3375	-114.401	0.01	5.04	5.6	6.16	XRF	IGNEOUS	VOLCANIC	FELSIC	TUFF																														5
L81-18		NAVDAT		Petrology and geochemistry of the Magic Reservoir eruptive center,Snake River plain, Idaho	Thesis or dissertation; Master's; Monographic	Honjo, Norio		43.3	-114.35	0.1	5.04	5.6	6.16	ICP	IGNEOUS	VOLCANIC	FELSIC	TUFF		74.24	0.24	12.44			2.07				0.03	0.08	0.54		3.41	5.51	0.03												2	3
L81-18		NAVDAT		Petrology and geochemistry of the Magic Reservoir eruptive center,Snake River plain, Idaho	Thesis or dissertation; Master's; Monographic	Honjo, Norio		43.3	-114.35	0.1	5.04	5.6	6.16	XRF	IGNEOUS	VOLCANIC	FELSIC	TUFF																														6
L82-16		NAVDAT		Petrology and geochemistry of the Magic Reservoir eruptive center,Snake River plain, Idaho	Thesis or dissertation; Master's; Monographic	Honjo, Norio		43.3	-114.35	0.1	5.04	5.6	6.16	ICP	IGNEOUS	VOLCANIC	FELSIC	TUFF		75.89	0.24	13.08			2.24				0.03	0.1	0.69		3.21	5.41	0.04												3	3
L82-16		NAVDAT		Petrology and geochemistry of the Magic Reservoir eruptive center,Snake River plain, Idaho	Thesis or dissertation; Master's; Monographic	Honjo, Norio		43.3	-114.35	0.1	5.04	5.6	6.16	XRF	IGNEOUS	VOLCANIC	FELSIC	TUFF																														2
L82-17		NAVDAT		Petrology and geochemistry of the Magic Reservoir eruptive center,Snake River plain, Idaho	Thesis or dissertation; Master's; Monographic	Honjo, Norio		43.3	-114.35	0.1	5.04	5.6	6.16	ICP	IGNEOUS	VOLCANIC	FELSIC	TUFF		75.27	0.24	12.46			2.17				0.02	0.09	0.56		3.28	5.45	0.03											1	2	3
L82-17		NAVDAT		Petrology and geochemistry of the Magic Reservoir eruptive center,Snake River plain, Idaho	Thesis or dissertation; Master's; Monographic	Honjo, Norio		43.3	-114.35	0.1	5.04	5.6	6.16	XRF	IGNEOUS	VOLCANIC	FELSIC	TUFF																														6
S80-A1-S02		NAVDAT		Geology of the Mount St. Helens area; record of discontinuous volcanicand plutonic activity in the Cascade Arc of southern Washington	Journal of Geophysical Research, vol.92, no.B10, pp.10,155-10,169, 10Sep 1987	Anonymous		46.4657	-122.224	0.0001	27.6	28.5	29.4	AAS	IGNEOUS	VOLCANIC	FELSIC	TUFF																0.306
S78-D5-E199A		NAVDAT		Geology of the Mount St. Helens area; record of discontinuous volcanicand plutonic activity in the Cascade Arc of southern Washington	Journal of Geophysical Research, vol.92, no.B10, pp.10,155-10,169, 10Sep 1987	Anonymous		46.2565	-122.062	0.0001	23.4	24	24.6	AAS	IGNEOUS	VOLCANIC	FELSIC	TUFF																0.208
84SH-V82		NAVDAT		Geology of the Mount St. Helens area; record of discontinuous volcanicand plutonic activity in the Cascade Arc of southern Washington	Journal of Geophysical Research, vol.92, no.B10, pp.10,155-10,169, 10Sep 1987	Anonymous		46.2045	-122.062	0.0001	23.9	24.9	25.9	AAS	IGNEOUS	VOLCANIC	FELSIC	TUFF																0.232
245		NAVDAT		Rise and fall of a basalt-trachyte-rhyolite magma system at the KaneSprings Wash Caldera, Nevada	Contributions to Mineralogy and Petrology, vol.94, no.3, pp.352-373,1986	Novak, S W; Mahood, G A		37.2517	-114.632	0.1	13.2	13.65	14.1	INAA	IGNEOUS	VOLCANIC	FELSIC	TUFF																													0.4
245		NAVDAT		Rise and fall of a basalt-trachyte-rhyolite magma system at the KaneSprings Wash Caldera, Nevada	Contributions to Mineralogy and Petrology, vol.94, no.3, pp.352-373,1986	Novak, S W; Mahood, G A		37.2517	-114.632	0.1	13.2	13.65	14.1	XRF	IGNEOUS	VOLCANIC	FELSIC	TUFF		71.8	0.23	12.1		2.39					0.04	0.16	0.72		3.97	4.69	0.02
89		NAVDAT		Rise and fall of a basalt-trachyte-rhyolite magma system at the KaneSprings Wash Caldera, Nevada	Contributions to Mineralogy and Petrology, vol.94, no.3, pp.352-373,1986	Novak, S W; Mahood, G A		37.2517	-114.632	0.1	13.9	14.1	14.3	INAA	IGNEOUS	VOLCANIC	FELSIC	TUFF																													0.2
89		NAVDAT		Rise and fall of a basalt-trachyte-rhyolite magma system at the KaneSprings Wash Caldera, Nevada	Contributions to Mineralogy and Petrology, vol.94, no.3, pp.352-373,1986	Novak, S W; Mahood, G A		37.2517	-114.632	0.1	13.9	14.1	14.3	XRF	IGNEOUS	VOLCANIC	FELSIC	TUFF		73.1	0.17	11.1		2.72					0.04	0.1	0.26		4.04	4.29	0.05			1.02
204		NAVDAT		Rise and fall of a basalt-trachyte-rhyolite magma system at the KaneSprings Wash Caldera, Nevada	Contributions to Mineralogy and Petrology, vol.94, no.3, pp.352-373,1986	Novak, S W; Mahood, G A		37.2517	-114.632	0.1	13.9	14.1	14.3	XRF	IGNEOUS	VOLCANIC	FELSIC	TUFF		74.4	0.15	11.2		2.94					0.05	0.21	0.15		3.73	4.7	0.05
171		NAVDAT		Rise and fall of a basalt-trachyte-rhyolite magma system at the KaneSprings Wash Caldera, Nevada	Contributions to Mineralogy and Petrology, vol.94, no.3, pp.352-373,1986	Novak, S W; Mahood, G A		37.2517	-114.632	0.1	13.9	14.1	14.3	XRF	IGNEOUS	VOLCANIC	FELSIC	TUFF		76.3	0.15	11.3		2.78					0.06	0.09	0.21		4.12	4.91	0.03			1.7
326		NAVDAT		Rise and fall of a basalt-trachyte-rhyolite magma system at the KaneSprings Wash Caldera, Nevada	Contributions to Mineralogy and Petrology, vol.94, no.3, pp.352-373,1986	Novak, S W; Mahood, G A		37.2517	-114.632	0.1	13.9	14.1	14.3	INAA	IGNEOUS	VOLCANIC	FELSIC	TUFF																													2.4
326		NAVDAT		Rise and fall of a basalt-trachyte-rhyolite magma system at the KaneSprings Wash Caldera, Nevada	Contributions to Mineralogy and Petrology, vol.94, no.3, pp.352-373,1986	Novak, S W; Mahood, G A		37.2517	-114.632	0.1	13.9	14.1	14.3	XRF	IGNEOUS	VOLCANIC	FELSIC	TUFF		65.3	0.48	14.2		4.95					0.18	0.55	1.53		4.67	5.55	0.09			0.54
98		NAVDAT		Rise and fall of a basalt-trachyte-rhyolite magma system at the KaneSprings Wash Caldera, Nevada	Contributions to Mineralogy and Petrology, vol.94, no.3, pp.352-373,1986	Novak, S W; Mahood, G A		37.2517	-114.632	0.1	13.2	13.65	14.1	INAA	IGNEOUS	VOLCANIC	FELSIC	TUFF																													0.1
98		NAVDAT		Rise and fall of a basalt-trachyte-rhyolite magma system at the KaneSprings Wash Caldera, Nevada	Contributions to Mineralogy and Petrology, vol.94, no.3, pp.352-373,1986	Novak, S W; Mahood, G A		37.2517	-114.632	0.1	13.2	13.65	14.1	XRF	IGNEOUS	VOLCANIC	FELSIC	TUFF		75.7	0.19	11.1		2.89					0.07	0.22	0.43		3.91	4.7	0.05			0.56
BB712A		NAVDAT		New potassium-argon ages, geochemistry, and tectonic setting of upperCenozoic volcanic rocks near Blackfoot, Idaho	U. S. Geological Survey Bulletin, Report: B 1806, 19 pp., 1988	Kellogg, Karl S; Marvin, Richard F		43.0158	-112.328	0.001	6.2	6.4	6.6	UNKNOWN	IGNEOUS	VOLCANIC	FELSIC	TUFF		75.9	0.25	12.2		0.96		0.46			0.01	0.17	0.46		3.3	5.13	0.03				0.13	0.3
BF750B		NAVDAT		New potassium-argon ages, geochemistry, and tectonic setting of upperCenozoic volcanic rocks near Blackfoot, Idaho	U. S. Geological Survey Bulletin, Report: B 1806, 19 pp., 1988	Kellogg, Karl S; Marvin, Richard F		43.1467	-112.291	0.001	3.87	4.3	4.73	UNKNOWN	IGNEOUS	VOLCANIC	FELSIC	TUFF		71.3	0.23	11.9		0.74		0.62			0.03	0.23	2.15		2.78	5.2	0.03				0.39	2.82
BF641B		NAVDAT		New potassium-argon ages, geochemistry, and tectonic setting of upperCenozoic volcanic rocks near Blackfoot, Idaho	U. S. Geological Survey Bulletin, Report: B 1806, 19 pp., 1988	Kellogg, Karl S; Marvin, Richard F		43.1364	-112.294	0.001	3.87	4.3	4.73	UNKNOWN	IGNEOUS	VOLCANIC	FELSIC	TUFF		72.1	0.22	12.3		0.54		0.72			0.02	0.26	0.68		2.78	5.29	0.1				0.41	2.72
BK753B		NAVDAT		New potassium-argon ages, geochemistry, and tectonic setting of upperCenozoic volcanic rocks near Blackfoot, Idaho	U. S. Geological Survey Bulletin, Report: B 1806, 19 pp., 1988	Kellogg, Karl S; Marvin, Richard F		42.6914	-112.96	0.001	6.2	6.4	6.6	UNKNOWN	IGNEOUS	VOLCANIC	FELSIC	TUFF		73.6	0.21	11.8		0.77		0.49			0.03	0.22	0.54		2.89	5.46	0.03				0.17	2.89
BB671B		NAVDAT		New potassium-argon ages, geochemistry, and tectonic setting of upperCenozoic volcanic rocks near Blackfoot, Idaho	U. S. Geological Survey Bulletin, Report: B 1806, 19 pp., 1988	Kellogg, Karl S; Marvin, Richard F		43.1194	-112.263	0.001	7.11	7.9	8.69	UNKNOWN	IGNEOUS	VOLCANIC	FELSIC	TUFF		72.8	0.13	13		1		0.21			0.01	0.24	0.95		2.79	5.13	0.03				0.61	1.3
BB667B		NAVDAT		New potassium-argon ages, geochemistry, and tectonic setting of upperCenozoic volcanic rocks near Blackfoot, Idaho	U. S. Geological Survey Bulletin, Report: B 1806, 19 pp., 1988	Kellogg, Karl S; Marvin, Richard F		43.1231	-112.269	0.001	7.11	7.9	8.69	UNKNOWN	IGNEOUS	VOLCANIC	FELSIC	TUFF		72	0.3	13.1		0.82		0.99			0.03	0.33	1.76		2.64	4.24	0.08				0.32	1.54
BB670B		NAVDAT		New potassium-argon ages, geochemistry, and tectonic setting of upperCenozoic volcanic rocks near Blackfoot, Idaho	U. S. Geological Survey Bulletin, Report: B 1806, 19 pp., 1988	Kellogg, Karl S; Marvin, Richard F		43.1189	-112.264	0.001	7.11	7.9	8.69	UNKNOWN	IGNEOUS	VOLCANIC	FELSIC	TUFF		72	0.05	13		0.86		0.16			0.05	0.27	0.53		2.75	5.18	0.03				0.69	2.34
BF707B		NAVDAT		New potassium-argon ages, geochemistry, and tectonic setting of upperCenozoic volcanic rocks near Blackfoot, Idaho	U. S. Geological Survey Bulletin, Report: B 1806, 19 pp., 1988	Kellogg, Karl S; Marvin, Richard F		43.1356	-112.256	0.001	0.5	2.4	4.3	UNKNOWN	IGNEOUS	VOLCANIC	FELSIC	TUFF		75.6	0.29	12.8		0.38		0.25			0.01	0.17	0.79		3.31	5.13	0.03				0.23	0.25
87-205		NAVDAT		The determination of 30 elements in geological materials by energy dispersion X-ray fluorescence spectrometry.	Open-File Report - U. S. Geological Survey. Pages U1-U11. 2002. .	Siems-David-F		37.561	-106.738	0.0001	27	27.1	27.2	XRF	IGNEOUS	VOLCANIC	FELSIC	TUFF																														6
87-205		NAVDAT		Analysis of geologic materials by wavelength-dispersive X-ray fluorescence spectrometry.	U. S. Geological Survey Bulletin. Pages E1-E19. 1987. .	Taggart-Joseph-E Jr.; Lindsay-J-R; Scott-B-A; Vivit-Davison-V; Bartel-A-J; Stewart-Kathleen-C		37.561	-106.738	0.0001	27	27.1	27.2	XRF	IGNEOUS	VOLCANIC	FELSIC	TUFF		70.6113	0.4221	15.6278		1.9698					0.07035	0.5025	1.47735		4.39185	5.29635	0.13065		0.91
87-206		NAVDAT		The determination of 30 elements in geological materials by energy dispersion X-ray fluorescence spectrometry.	Open-File Report - U. S. Geological Survey. Pages U1-U11. 2002. .	Siems-David-F		37.562	-106.738	0.0001	27	27.1	27.2	XRF	IGNEOUS	VOLCANIC	FELSIC	TUFF																														8
87-206		NAVDAT		Analysis of geologic materials by wavelength-dispersive X-ray fluorescence spectrometry.	U. S. Geological Survey Bulletin. Pages E1-E19. 1987. .	Taggart-Joseph-E Jr.; Lindsay-J-R; Scott-B-A; Vivit-Davison-V; Bartel-A-J; Stewart-Kathleen-C		37.562	-106.738	0.0001	27	27.1	27.2	XRF	IGNEOUS	VOLCANIC	FELSIC	TUFF		71.1484	0.412542	15.2439		1.9319					0.05031	0.533286	1.298		4.41722	5.47373	0.110682		0.37
87-207		NAVDAT		The determination of 30 elements in geological materials by energy dispersion X-ray fluorescence spectrometry.	Open-File Report - U. S. Geological Survey. Pages U1-U11. 2002. .	Siems-David-F		37.563	-106.738	0.0001	27	27.1	27.2	XRF	IGNEOUS	VOLCANIC	FELSIC	TUFF																														4
87-207		NAVDAT		Analysis of geologic materials by wavelength-dispersive X-ray fluorescence spectrometry.	U. S. Geological Survey Bulletin. Pages E1-E19. 1987. .	Taggart-Joseph-E Jr.; Lindsay-J-R; Scott-B-A; Vivit-Davison-V; Bartel-A-J; Stewart-Kathleen-C		37.563	-106.738	0.0001	27	27.1	27.2	XRF	IGNEOUS	VOLCANIC	FELSIC	TUFF		70.0626	0.431247	15.6252		1.97571					0.060174	0.742146	1.5545		4.36262	5.34546	0.120348		0.72
87-207		NAVDAT		Instrumental neutron activation by abbreviated count.	Open-File Report - U. S. Geological Survey. Pages Y1-Y9. 2002. .	Budahn-James-R; Wandless-Gregory-A		37.563	-106.738	0.0001	27	27.1	27.2	INAA	IGNEOUS	VOLCANIC	FELSIC	TUFF
87-217		NAVDAT		The determination of 30 elements in geological materials by energy dispersion X-ray fluorescence spectrometry.	Open-File Report - U. S. Geological Survey. Pages U1-U11. 2002. .	Siems-David-F		37.865	-106.801	0.0001	27	27.1	27.2	XRF	IGNEOUS	VOLCANIC	FELSIC	TUFF																														5
87-217		NAVDAT		Analysis of geologic materials by wavelength-dispersive X-ray fluorescence spectrometry.	U. S. Geological Survey Bulletin. Pages E1-E19. 1987. .	Taggart-Joseph-E Jr.; Lindsay-J-R; Scott-B-A; Vivit-Davison-V; Bartel-A-J; Stewart-Kathleen-C		37.865	-106.801	0.0001	27	27.1	27.2	XRF	IGNEOUS	VOLCANIC	FELSIC	TUFF		68.9156	0.444356	16.7038		1.91881					0.0807921	1.18158	2.23188		3.97901	5.40297	0.121188		2.25
87-217		NAVDAT		Instrumental neutron activation by abbreviated count.	Open-File Report - U. S. Geological Survey. Pages Y1-Y9. 2002. .	Budahn-James-R; Wandless-Gregory-A		37.865	-106.801	0.0001	27	27.1	27.2	INAA	IGNEOUS	VOLCANIC	FELSIC	TUFF
87-223		NAVDAT		The determination of 30 elements in geological materials by energy dispersion X-ray fluorescence spectrometry.	Open-File Report - U. S. Geological Survey. Pages U1-U11. 2002. .	Siems-David-F		37.865	-106.801	0.001	27	27.1	27.2	XRF	IGNEOUS	VOLCANIC	FELSIC	TUFF																														2
87-222		NAVDAT		The determination of 30 elements in geological materials by energy dispersion X-ray fluorescence spectrometry.	Open-File Report - U. S. Geological Survey. Pages U1-U11. 2002. .	Siems-David-F		37.865	-106.801	0.001	27	27.1	27.2	XRF	IGNEOUS	VOLCANIC	FELSIC	TUFF																														5
87-222		NAVDAT		Analysis of geologic materials by wavelength-dispersive X-ray fluorescence spectrometry.	U. S. Geological Survey Bulletin. Pages E1-E19. 1987. .	Taggart-Joseph-E Jr.; Lindsay-J-R; Scott-B-A; Vivit-Davison-V; Bartel-A-J; Stewart-Kathleen-C		37.865	-106.801	0.001	27	27.1	27.2	XRF	IGNEOUS	VOLCANIC	FELSIC	TUFF		70.817	0.411435	15.3435		1.95683					0.090315	0.712485	1.41494		4.11435	5.36873	0.110385		0.97
87-223		NAVDAT		Analysis of geologic materials by wavelength-dispersive X-ray fluorescence spectrometry.	U. S. Geological Survey Bulletin. Pages E1-E19. 1987. .	Taggart-Joseph-E Jr.; Lindsay-J-R; Scott-B-A; Vivit-Davison-V; Bartel-A-J; Stewart-Kathleen-C		37.865	-106.801	0.001	27	27.1	27.2	XRF	IGNEOUS	VOLCANIC	FELSIC	TUFF		68.9269	0.40004	16.5517		2.0302					0.060006	0.680068	1.77018		4.32043	5.12051	0.140014		0.84
87-225		NAVDAT		The determination of 30 elements in geological materials by energy dispersion X-ray fluorescence spectrometry.	Open-File Report - U. S. Geological Survey. Pages U1-U11. 2002. .	Siems-David-F		37.816	-107.134	0.0001	27	27.1	27.2	XRF	IGNEOUS	VOLCANIC	FELSIC	TUFF																														10
87-225		NAVDAT		Analysis of geologic materials by wavelength-dispersive X-ray fluorescence spectrometry.	U. S. Geological Survey Bulletin. Pages E1-E19. 1987. .	Taggart-Joseph-E Jr.; Lindsay-J-R; Scott-B-A; Vivit-Davison-V; Bartel-A-J; Stewart-Kathleen-C		37.816	-107.134	0.0001	27	27.1	27.2	XRF	IGNEOUS	VOLCANIC	FELSIC	TUFF		69.2744	0.423696	16.2518		2.07813					0.0907921	0.766689	2.11848		4.54969	5.1348	0.181584		0.53
87-226		NAVDAT		The determination of 30 elements in geological materials by energy dispersion X-ray fluorescence spectrometry.	Open-File Report - U. S. Geological Survey. Pages U1-U11. 2002. .	Siems-David-F		37.815	-107.133	0.0001	27	27.1	27.2	XRF	IGNEOUS	VOLCANIC	FELSIC	TUFF																														8
87-226		NAVDAT		Analysis of geologic materials by wavelength-dispersive X-ray fluorescence spectrometry.	U. S. Geological Survey Bulletin. Pages E1-E19. 1987. .	Taggart-Joseph-E Jr.; Lindsay-J-R; Scott-B-A; Vivit-Davison-V; Bartel-A-J; Stewart-Kathleen-C		37.815	-107.133	0.0001	27	27.1	27.2	XRF	IGNEOUS	VOLCANIC	FELSIC	TUFF		68.715	0.409672	16.0771		2.03837					0.069944	0.759392	2.13829		4.4964	5.06594	0.14988		0.42
87-229		NAVDAT		The determination of 30 elements in geological materials by energy dispersion X-ray fluorescence spectrometry.	Open-File Report - U. S. Geological Survey. Pages U1-U11. 2002. .	Siems-David-F		37.531	-106.785	0.0001	27	27.1	27.2	XRF	IGNEOUS	VOLCANIC	FELSIC	TUFF																														8
87-229		NAVDAT		Analysis of geologic materials by wavelength-dispersive X-ray fluorescence spectrometry.	U. S. Geological Survey Bulletin. Pages E1-E19. 1987. .	Taggart-Joseph-E Jr.; Lindsay-J-R; Scott-B-A; Vivit-Davison-V; Bartel-A-J; Stewart-Kathleen-C		37.531	-106.785	0.0001	27	27.1	27.2	XRF	IGNEOUS	VOLCANIC	FELSIC	TUFF		72.7835	0.494508	15.0472		0.90828					0.030276	0.625704	1.36242		4.29919	5.25793	0.111012		0.78
87-229		NAVDAT		Instrumental neutron activation by abbreviated count.	Open-File Report - U. S. Geological Survey. Pages Y1-Y9. 2002. .	Budahn-James-R; Wandless-Gregory-A		37.531	-106.785	0.0001	27	27.1	27.2	INAA	IGNEOUS	VOLCANIC	FELSIC	TUFF
87-230		NAVDAT		The determination of 30 elements in geological materials by energy dispersion X-ray fluorescence spectrometry.	Open-File Report - U. S. Geological Survey. Pages U1-U11. 2002. .	Siems-David-F		37.531	-106.784	0.0001	27	27.1	27.2	XRF	IGNEOUS	VOLCANIC	FELSIC	TUFF
87-230		NAVDAT		Analysis of geologic materials by wavelength-dispersive X-ray fluorescence spectrometry.	U. S. Geological Survey Bulletin. Pages E1-E19. 1987. .	Taggart-Joseph-E Jr.; Lindsay-J-R; Scott-B-A; Vivit-Davison-V; Bartel-A-J; Stewart-Kathleen-C		37.531	-106.784	0.0001	27	27.1	27.2	XRF	IGNEOUS	VOLCANIC	FELSIC	TUFF		71.899	0.494684	15.1514		1.09516					0.0403824	0.666309	1.38654		4.32037	5.30501	0.121147		0.69
87-231		NAVDAT		The determination of 30 elements in geological materials by energy dispersion X-ray fluorescence spectrometry.	Open-File Report - U. S. Geological Survey. Pages U1-U11. 2002. .	Siems-David-F		37.532	-106.784	0.0001	27	27.1	27.2	XRF	IGNEOUS	VOLCANIC	FELSIC	TUFF																														1
87-231		NAVDAT		Analysis of geologic materials by wavelength-dispersive X-ray fluorescence spectrometry.	U. S. Geological Survey Bulletin. Pages E1-E19. 1987. .	Taggart-Joseph-E Jr.; Lindsay-J-R; Scott-B-A; Vivit-Davison-V; Bartel-A-J; Stewart-Kathleen-C		37.532	-106.784	0.0001	27	27.1	27.2	XRF	IGNEOUS	VOLCANIC	FELSIC	TUFF		71.5985	0.4411	15.0375		1.39348					0.06015	0.62155	1.30325		4.2907	5.40347	0.10025		0.79
87-231		NAVDAT		Instrumental neutron activation by abbreviated count.	Open-File Report - U. S. Geological Survey. Pages Y1-Y9. 2002. .	Budahn-James-R; Wandless-Gregory-A		37.532	-106.784	0.0001	27	27.1	27.2	INAA	IGNEOUS	VOLCANIC	FELSIC	TUFF
87-234		NAVDAT		The determination of 30 elements in geological materials by energy dispersion X-ray fluorescence spectrometry.	Open-File Report - U. S. Geological Survey. Pages U1-U11. 2002. .	Siems-David-F		37.533	-106.783	0.0001	27	27.1	27.2	XRF	IGNEOUS	VOLCANIC	FELSIC	TUFF																														5
87-234		NAVDAT		Analysis of geologic materials by wavelength-dispersive X-ray fluorescence spectrometry.	U. S. Geological Survey Bulletin. Pages E1-E19. 1987. .	Taggart-Joseph-E Jr.; Lindsay-J-R; Scott-B-A; Vivit-Davison-V; Bartel-A-J; Stewart-Kathleen-C		37.533	-106.783	0.0001	27	27.1	27.2	XRF	IGNEOUS	VOLCANIC	FELSIC	TUFF		71.2907	0.390936	15.3467		1.7943					0.040096	0.711704	1.35324		2.63631	6.56572	0.10024		2.4
87-234		NAVDAT		Instrumental neutron activation by abbreviated count.	Open-File Report - U. S. Geological Survey. Pages Y1-Y9. 2002. .	Budahn-James-R; Wandless-Gregory-A		37.533	-106.783	0.0001	27	27.1	27.2	INAA	IGNEOUS	VOLCANIC	FELSIC	TUFF
87-256		NAVDAT		The determination of 30 elements in geological materials by energy dispersion X-ray fluorescence spectrometry.	Open-File Report - U. S. Geological Survey. Pages U1-U11. 2002. .	Siems-David-F		37.746	-106.74	0.001	27	27.1	27.2	XRF	IGNEOUS	VOLCANIC	FELSIC	TUFF																														7
87-256		NAVDAT		Analysis of geologic materials by wavelength-dispersive X-ray fluorescence spectrometry.	U. S. Geological Survey Bulletin. Pages E1-E19. 1987. .	Taggart-Joseph-E Jr.; Lindsay-J-R; Scott-B-A; Vivit-Davison-V; Bartel-A-J; Stewart-Kathleen-C		37.746	-106.74	0.001	27	27.1	27.2	XRF	IGNEOUS	VOLCANIC	FELSIC	TUFF		68.6417	0.429011	16.2326		1.98542					0.089793	0.668459	1.93554		4.41981	5.22795	0.129701		0.36
87-257		NAVDAT		The determination of 30 elements in geological materials by energy dispersion X-ray fluorescence spectrometry.	Open-File Report - U. S. Geological Survey. Pages U1-U11. 2002. .	Siems-David-F		37.746	-106.74	0.001	27	27.1	27.2	XRF	IGNEOUS	VOLCANIC	FELSIC	TUFF																														7
87-257		NAVDAT		Analysis of geologic materials by wavelength-dispersive X-ray fluorescence spectrometry.	U. S. Geological Survey Bulletin. Pages E1-E19. 1987. .	Taggart-Joseph-E Jr.; Lindsay-J-R; Scott-B-A; Vivit-Davison-V; Bartel-A-J; Stewart-Kathleen-C		37.746	-106.74	0.001	27	27.1	27.2	XRF	IGNEOUS	VOLCANIC	FELSIC	TUFF		69.0468	0.40284	16.738		1.7725					0.060426	0.654615	1.99406		4.5823	5.32756	0.130923		0.66
87-258		NAVDAT		The determination of 30 elements in geological materials by energy dispersion X-ray fluorescence spectrometry.	Open-File Report - U. S. Geological Survey. Pages U1-U11. 2002. .	Siems-David-F		37.746	-106.74	0.001	27	27.1	27.2	XRF	IGNEOUS	VOLCANIC	FELSIC	TUFF																														8
87-258		NAVDAT		Analysis of geologic materials by wavelength-dispersive X-ray fluorescence spectrometry.	U. S. Geological Survey Bulletin. Pages E1-E19. 1987. .	Taggart-Joseph-E Jr.; Lindsay-J-R; Scott-B-A; Vivit-Davison-V; Bartel-A-J; Stewart-Kathleen-C		37.746	-106.74	0.001	27	27.1	27.2	XRF	IGNEOUS	VOLCANIC	FELSIC	TUFF		66.9302	0.520468	16.9352		2.7825					0.080072	0.990891	2.63237		4.31388	4.73426	0.170153		0.76
Older Tuffs Unit C		NAVDAT		Chemical and mineralogic trends within the Timber Mountain-Oasis Valley caldera complex, Nevada; evidence for multiple cycles of chemical evolution in a long-lived silicic magma system	Journal of Geophysical Research, B, Solid Earth and Planets, vol.94, no.5, pp.5961-5985, 10 May 1989	Broxton, David E; Warren, Richard G; Byers, Frank M, Jr; Scott, Robert B		36.9	-116.5	1	12.87	14.3	15.73	INAA	IGNEOUS	VOLCANIC	FELSIC	TUFF																													4.9
Older Tuffs Unit C		NAVDAT		Chemical and mineralogic trends within the Timber Mountain-Oasis Valley caldera complex, Nevada; evidence for multiple cycles of chemical evolution in a long-lived silicic magma system	Journal of Geophysical Research, B, Solid Earth and Planets, vol.94, no.5, pp.5961-5985, 10 May 1989	Broxton, David E; Warren, Richard G; Byers, Frank M, Jr; Scott, Robert B		36.9	-116.5	1	12.87	14.3	15.73	XRF	IGNEOUS	VOLCANIC	FELSIC	TUFF		68.4	0.46	16.1					2.8		0.07						0.14
Older Tuffs Unit A		NAVDAT		Chemical and mineralogic trends within the Timber Mountain-Oasis Valley caldera complex, Nevada; evidence for multiple cycles of chemical evolution in a long-lived silicic magma system	Journal of Geophysical Research, B, Solid Earth and Planets, vol.94, no.5, pp.5961-5985, 10 May 1989	Broxton, David E; Warren, Richard G; Byers, Frank M, Jr; Scott, Robert B		36.9	-116.5	1	12.87	14.3	15.73	INAA	IGNEOUS	VOLCANIC	FELSIC	TUFF																													1.1
Older Tuffs Unit A		NAVDAT		Chemical and mineralogic trends within the Timber Mountain-Oasis Valley caldera complex, Nevada; evidence for multiple cycles of chemical evolution in a long-lived silicic magma system	Journal of Geophysical Research, B, Solid Earth and Planets, vol.94, no.5, pp.5961-5985, 10 May 1989	Broxton, David E; Warren, Richard G; Byers, Frank M, Jr; Scott, Robert B		36.9	-116.5	1	12.87	14.3	15.73	XRF	IGNEOUS	VOLCANIC	FELSIC	TUFF		75.3	0.19	13.5					1.3		0.04						< 0.05
Lithic Ridge Tuff		NAVDAT		Chemical and mineralogic trends within the Timber Mountain-Oasis Valley caldera complex, Nevada; evidence for multiple cycles of chemical evolution in a long-lived silicic magma system	Journal of Geophysical Research, B, Solid Earth and Planets, vol.94, no.5, pp.5961-5985, 10 May 1989	Broxton, David E; Warren, Richard G; Byers, Frank M, Jr; Scott, Robert B		37.1	-116.3	1	13.9	14.1	14.3	INAA	IGNEOUS	VOLCANIC	FELSIC	TUFF																													1.5
Lithic Ridge Tuff		NAVDAT		Chemical and mineralogic trends within the Timber Mountain-Oasis Valley caldera complex, Nevada; evidence for multiple cycles of chemical evolution in a long-lived silicic magma system	Journal of Geophysical Research, B, Solid Earth and Planets, vol.94, no.5, pp.5961-5985, 10 May 1989	Broxton, David E; Warren, Richard G; Byers, Frank M, Jr; Scott, Robert B		37.1	-116.3	1	13.9	14.1	14.3	XRF	IGNEOUS	VOLCANIC	FELSIC	TUFF		73.1	0.31	14.1					1.2		0.06						0.07
Crater Flat Tuff -Tram Member		NAVDAT		Chemical and mineralogic trends within the Timber Mountain-Oasis Valley caldera complex, Nevada; evidence for multiple cycles of chemical evolution in a long-lived silicic magma system	Journal of Geophysical Research, B, Solid Earth and Planets, vol.94, no.5, pp.5961-5985, 10 May 1989	Broxton, David E; Warren, Richard G; Byers, Frank M, Jr; Scott, Robert B		37	-116.4	1	13.9	14.1	14.3	INAA	IGNEOUS	VOLCANIC	FELSIC	TUFF																													1.23
Crater Flat Tuff -Tram Member		NAVDAT		Chemical and mineralogic trends within the Timber Mountain-Oasis Valley caldera complex, Nevada; evidence for multiple cycles of chemical evolution in a long-lived silicic magma system	Journal of Geophysical Research, B, Solid Earth and Planets, vol.94, no.5, pp.5961-5985, 10 May 1989	Broxton, David E; Warren, Richard G; Byers, Frank M, Jr; Scott, Robert B		37	-116.4	1	13.9	14.1	14.3	XRF	IGNEOUS	VOLCANIC	FELSIC	TUFF		75.8	0.18	13.3					1.23		0.07	0.26	0.81		3.15	5.19	< 0.05
Crater Flat Tuff - Bullfrog Member		NAVDAT		Chemical and mineralogic trends within the Timber Mountain-Oasis Valley caldera complex, Nevada; evidence for multiple cycles of chemical evolution in a long-lived silicic magma system	Journal of Geophysical Research, B, Solid Earth and Planets, vol.94, no.5, pp.5961-5985, 10 May 1989	Broxton, David E; Warren, Richard G; Byers, Frank M, Jr; Scott, Robert B		36.9	-116.5	1	12.51	13.9	15.29	INAA	IGNEOUS	VOLCANIC	FELSIC	TUFF																													0.66
Crater Flat Tuff - Bullfrog Member		NAVDAT		Chemical and mineralogic trends within the Timber Mountain-Oasis Valley caldera complex, Nevada; evidence for multiple cycles of chemical evolution in a long-lived silicic magma system	Journal of Geophysical Research, B, Solid Earth and Planets, vol.94, no.5, pp.5961-5985, 10 May 1989	Broxton, David E; Warren, Richard G; Byers, Frank M, Jr; Scott, Robert B		36.9	-116.5	1	12.51	13.9	15.29	XRF	IGNEOUS	VOLCANIC	FELSIC	TUFF		76.1	0.11	13.2					1.15		0.08	0.17	0.62		3.54	4.97	< 0.05
Stockade Wash Tuff		NAVDAT		Chemical and mineralogic trends within the Timber Mountain-Oasis Valley caldera complex, Nevada; evidence for multiple cycles of chemical evolution in a long-lived silicic magma system	Journal of Geophysical Research, B, Solid Earth and Planets, vol.94, no.5, pp.5961-5985, 10 May 1989	Broxton, David E; Warren, Richard G; Byers, Frank M, Jr; Scott, Robert B		37.2	-116.5	1	13.75	14.025	14.3	INAA	IGNEOUS	VOLCANIC	FELSIC	TUFF																													0.62
Stockade Wash Tuff		NAVDAT		Chemical and mineralogic trends within the Timber Mountain-Oasis Valley caldera complex, Nevada; evidence for multiple cycles of chemical evolution in a long-lived silicic magma system	Journal of Geophysical Research, B, Solid Earth and Planets, vol.94, no.5, pp.5961-5985, 10 May 1989	Broxton, David E; Warren, Richard G; Byers, Frank M, Jr; Scott, Robert B		37.2	-116.5	1	13.75	14.025	14.3	XRF	IGNEOUS	VOLCANIC	FELSIC	TUFF		75.6	0.13	13.1					1.15		0.07						0.01
Crater Flat Tuff - Prow Pass Member		NAVDAT		Chemical and mineralogic trends within the Timber Mountain-Oasis Valley caldera complex, Nevada; evidence for multiple cycles of chemical evolution in a long-lived silicic magma system	Journal of Geophysical Research, B, Solid Earth and Planets, vol.94, no.5, pp.5961-5985, 10 May 1989	Broxton, David E; Warren, Richard G; Byers, Frank M, Jr; Scott, Robert B		37	-116.4	1	13.75	13.83	13.9	INAA	IGNEOUS	VOLCANIC	FELSIC	TUFF																													0.45
Crater Flat Tuff - Prow Pass Member		NAVDAT		Chemical and mineralogic trends within the Timber Mountain-Oasis Valley caldera complex, Nevada; evidence for multiple cycles of chemical evolution in a long-lived silicic magma system	Journal of Geophysical Research, B, Solid Earth and Planets, vol.94, no.5, pp.5961-5985, 10 May 1989	Broxton, David E; Warren, Richard G; Byers, Frank M, Jr; Scott, Robert B		37	-116.4	1	13.75	13.83	13.9	XRF	IGNEOUS	VOLCANIC	FELSIC	TUFF		76.1	0.09	13.1					1.11		0.06	0.16	0.59		3.63	5.09
Paintbrush Tuff - Pah Canyon Member		NAVDAT		Chemical and mineralogic trends within the Timber Mountain-Oasis Valley caldera complex, Nevada; evidence for multiple cycles of chemical evolution in a long-lived silicic magma system	Journal of Geophysical Research, B, Solid Earth and Planets, vol.94, no.5, pp.5961-5985, 10 May 1989	Broxton, David E; Warren, Richard G; Byers, Frank M, Jr; Scott, Robert B		36.9	-116.5	1	12.9	13.1	13.4	INAA	IGNEOUS	VOLCANIC	FELSIC	TUFF
Paintbrush Tuff - Pah Canyon Member		NAVDAT		Chemical and mineralogic trends within the Timber Mountain-Oasis Valley caldera complex, Nevada; evidence for multiple cycles of chemical evolution in a long-lived silicic magma system	Journal of Geophysical Research, B, Solid Earth and Planets, vol.94, no.5, pp.5961-5985, 10 May 1989	Broxton, David E; Warren, Richard G; Byers, Frank M, Jr; Scott, Robert B		36.9	-116.5	1	12.9	13.1	13.4	XRF	IGNEOUS	VOLCANIC	FELSIC	TUFF		73.9	0.28	14.3					1.28		0.08	0.33	0.62		3.6	5.68	0.03
Paintbrush Tuff - Yucca Mountain member		NAVDAT		Chemical and mineralogic trends within the Timber Mountain-Oasis Valley caldera complex, Nevada; evidence for multiple cycles of chemical evolution in a long-lived silicic magma system	Journal of Geophysical Research, B, Solid Earth and Planets, vol.94, no.5, pp.5961-5985, 10 May 1989	Broxton, David E; Warren, Richard G; Byers, Frank M, Jr; Scott, Robert B		36.9	-116.5	1	12.9	13.1	13.4	INAA	IGNEOUS	VOLCANIC	FELSIC	TUFF																													0.27
Paintbrush Tuff - Yucca Mountain member		NAVDAT		Chemical and mineralogic trends within the Timber Mountain-Oasis Valley caldera complex, Nevada; evidence for multiple cycles of chemical evolution in a long-lived silicic magma system	Journal of Geophysical Research, B, Solid Earth and Planets, vol.94, no.5, pp.5961-5985, 10 May 1989	Broxton, David E; Warren, Richard G; Byers, Frank M, Jr; Scott, Robert B		36.9	-116.5	1	12.9	13.1	13.4	XRF	IGNEOUS	VOLCANIC	FELSIC	TUFF		76.8	0.14	12.8					0.9		0.11	0.19	0.13		4.25	4.68	0.02
Tuffs of Fleur-de-lis Ranch		NAVDAT		Chemical and mineralogic trends within the Timber Mountain-Oasis Valley caldera complex, Nevada; evidence for multiple cycles of chemical evolution in a long-lived silicic magma system	Journal of Geophysical Research, B, Solid Earth and Planets, vol.94, no.5, pp.5961-5985, 10 May 1989	Broxton, David E; Warren, Richard G; Byers, Frank M, Jr; Scott, Robert B		37.1	-116.7	1	10.26	11.4	12.54	INAA	IGNEOUS	VOLCANIC	FELSIC	TUFF																													2.7
Tuffs of Fleur-de-lis Ranch		NAVDAT		Chemical and mineralogic trends within the Timber Mountain-Oasis Valley caldera complex, Nevada; evidence for multiple cycles of chemical evolution in a long-lived silicic magma system	Journal of Geophysical Research, B, Solid Earth and Planets, vol.94, no.5, pp.5961-5985, 10 May 1989	Broxton, David E; Warren, Richard G; Byers, Frank M, Jr; Scott, Robert B		37.1	-116.7	1	10.26	11.4	12.54	XRF	IGNEOUS	VOLCANIC	FELSIC	TUFF		71.8	0.32	15					2		0.04	0.7	1.75		3.28	5.01	0.1
205W		NAVDAT		Origin of metaluminous and alkaline volcanic rocks of the Latirvolcanic field, northern Rio Grande Rift, New Mexico	Contributions to Mineralogy and Petrology, vol.100, no.1, pp.107-128,1988	Johnson, C M; Lipman, P W		36.7486	-105.456	1	26.5	26.75	27	UNKNOWN	IGNEOUS	VOLCANIC	FELSIC	TUFF									1.69
205W		NAVDAT		Origin of metaluminous and alkaline volcanic rocks of the Latirvolcanic field, northern Rio Grande Rift, New Mexico	Contributions to Mineralogy and Petrology, vol.100, no.1, pp.107-128,1988	Johnson, C M; Lipman, P W		36.7486	-105.456	1	26.5	26.75	27	WDXRF	IGNEOUS	VOLCANIC	FELSIC	TUFF																												2		6
205W		NAVDAT		Origin of metaluminous and alkaline volcanic rocks of the Latirvolcanic field, northern Rio Grande Rift, New Mexico	Contributions to Mineralogy and Petrology, vol.100, no.1, pp.107-128,1988	Johnson, C M; Lipman, P W		36.7486	-105.456	1	26.5	26.75	27	TIT	IGNEOUS	VOLCANIC	FELSIC	TUFF								0.03
205W		NAVDAT		Origin of metaluminous and alkaline volcanic rocks of the Latirvolcanic field, northern Rio Grande Rift, New Mexico	Contributions to Mineralogy and Petrology, vol.100, no.1, pp.107-128,1988	Johnson, C M; Lipman, P W		36.7486	-105.456	1	26.5	26.75	27	WDXRF	IGNEOUS	VOLCANIC	FELSIC	TUFF		77.4	0.13	11.7		1.84					0.04	0.15	0.36		0.36	4.83	< 0.05		1.22
39		NAVDAT		Origin of metaluminous and alkaline volcanic rocks of the Latirvolcanic field, northern Rio Grande Rift, New Mexico	Contributions to Mineralogy and Petrology, vol.100, no.1, pp.107-128,1988	Johnson, C M; Lipman, P W		36.7486	-105.456	1	26.5	26.75	27	MS-ID	IGNEOUS	VOLCANIC	FELSIC	TUFF
39		NAVDAT		Origin of metaluminous and alkaline volcanic rocks of the Latirvolcanic field, northern Rio Grande Rift, New Mexico	Contributions to Mineralogy and Petrology, vol.100, no.1, pp.107-128,1988	Johnson, C M; Lipman, P W		36.7486	-105.456	1	26.5	26.75	27	UNKNOWN	IGNEOUS	VOLCANIC	FELSIC	TUFF									1.24
39		NAVDAT		Origin of metaluminous and alkaline volcanic rocks of the Latirvolcanic field, northern Rio Grande Rift, New Mexico	Contributions to Mineralogy and Petrology, vol.100, no.1, pp.107-128,1988	Johnson, C M; Lipman, P W		36.7486	-105.456	1	26.5	26.75	27	WDXRF	IGNEOUS	VOLCANIC	FELSIC	TUFF																												< 1		< 1
39		NAVDAT		Origin of metaluminous and alkaline volcanic rocks of the Latirvolcanic field, northern Rio Grande Rift, New Mexico	Contributions to Mineralogy and Petrology, vol.100, no.1, pp.107-128,1988	Johnson, C M; Lipman, P W		36.7486	-105.456	1	26.5	26.75	27	WDXRF	IGNEOUS	VOLCANIC	FELSIC	TUFF		78	0.17	11.5							0.1	< 0.1	0.06		4.27	4.68	< 0.05		0.77
HFW-8-153-1CD		NAVDAT		Oligocene caldera complex and calc-alkaline tuffs and lavas of the Indian Peak volcanic field, Nevada and Utah.	Geological Society of America Bulletin. 101; 8, Pages 1076-1090. 1989.	Best-Myron-G; Christiansen-Eric-H; Blank-H-Richard Jr.		38.5569	-113.856	0.0001	27.54	30.6	33.66	XRF	IGNEOUS	VOLCANIC	FELSIC	TUFF		65.9	0.68	15.8		5.24					0.06	1.8	4.35		2.4	3.76	0.13
BRN-2-M		NAVDAT		Oligocene caldera complex and calc-alkaline tuffs and lavas of the Indian Peak volcanic field, Nevada and Utah.	Geological Society of America Bulletin. 101; 8, Pages 1076-1090. 1989.	Best-Myron-G; Christiansen-Eric-H; Blank-H-Richard Jr.		38.8194	-113.475	0.0001	27.54	30.6	33.66	XRF	IGNEOUS	VOLCANIC	FELSIC	TUFF		64.7	0.56	16.2		5.27					0.078	2.3	4.81		2.8	3.27	0.12
HFW-8-153-3CD		NAVDAT		Oligocene caldera complex and calc-alkaline tuffs and lavas of the Indian Peak volcanic field, Nevada and Utah.	Geological Society of America Bulletin. 101; 8, Pages 1076-1090. 1989.	Best-Myron-G; Christiansen-Eric-H; Blank-H-Richard Jr.		38.5761	-113.856	0.0001	26.55	29.5	32.45	XRF	IGNEOUS	VOLCANIC	FELSIC	TUFF		68.5	0.49	14.7		4.35					0.052	1.5	3.52		2.4	4.41	0.13
BRN-1-M		NAVDAT		Oligocene caldera complex and calc-alkaline tuffs and lavas of the Indian Peak volcanic field, Nevada and Utah.	Geological Society of America Bulletin. 101; 8, Pages 1076-1090. 1989.	Best-Myron-G; Christiansen-Eric-H; Blank-H-Richard Jr.		38.8111	-113.458	0.0001	26.55	29.5	32.45	XRF	IGNEOUS	VOLCANIC	FELSIC	TUFF		65.1	0.61	15.6		5.23					0.083	2.2	5.15		2.4	3.54	0.04
MINS-8-61-4BD		NAVDAT		Oligocene caldera complex and calc-alkaline tuffs and lavas of the Indian Peak volcanic field, Nevada and Utah.	Geological Society of America Bulletin. 101; 8, Pages 1076-1090. 1989.	Best-Myron-G; Christiansen-Eric-H; Blank-H-Richard Jr.		38.3347	-113.925	0.0001	25.11	27.9	30.69	XRF	IGNEOUS	VOLCANIC	FELSIC	TUFF		65.1	0.66	15.9		5.06					0.066	2.1	4.18		3.1	3.6	0.15
Tcl16		NAVDAT		Petrology of the Cueva Tuff and the Alkali Feldspar Granite Facies of the Organ Needle Pluton, Organ Mountains, Southern New Mexico	Thesis	Fitzpatrick, Delane Patricia		32.25	-106.567	0.1	34.4	33	31.6	ICP	IGNEOUS	VOLCANIC	FELSIC	TUFF		73.14	0.1	11.07		1.33					0.08	0.12	1.18		4.68	3.85
Tcl26		NAVDAT		Petrology of the Cueva Tuff and the Alkali Feldspar Granite Facies of the Organ Needle Pluton, Organ Mountains, Southern New Mexico	Thesis	Fitzpatrick, Delane Patricia		32.25	-106.567	0.1	34.4	33	31.6	ICP	IGNEOUS	VOLCANIC	FELSIC	TUFF		75.3	0.09	12.04		1.21					0.07	0.1	0.37		4.12	4.03
Tcp33		NAVDAT		Petrology of the Cueva Tuff and the Alkali Feldspar Granite Facies of the Organ Needle Pluton, Organ Mountains, Southern New Mexico	Thesis	Fitzpatrick, Delane Patricia		32.25	-106.567	0.1	34.4	33	31.6	ICP	IGNEOUS	VOLCANIC	FELSIC	TUFF		76.33	0.09	12.2		1.16					0.12	0.04	0.2		4.13	4.2
Tcp38		NAVDAT		Petrology of the Cueva Tuff and the Alkali Feldspar Granite Facies of the Organ Needle Pluton, Organ Mountains, Southern New Mexico	Thesis	Fitzpatrick, Delane Patricia		32.25	-106.567	0.1	34.4	33	31.6	ICP	IGNEOUS	VOLCANIC	FELSIC	TUFF		76.36	0.1	11.56		1.08					0.08	0.15	0.53		3.22	5.03
Tcu43		NAVDAT		Petrology of the Cueva Tuff and the Alkali Feldspar Granite Facies of the Organ Needle Pluton, Organ Mountains, Southern New Mexico	Thesis	Fitzpatrick, Delane Patricia		32.25	-106.567	0.1	34.4	33	31.6	ICP	IGNEOUS	VOLCANIC	FELSIC	TUFF		77.3	0.07	10.29		0.33					0.01	0.05	0.73		0.79	6.81
Tsc51		NAVDAT		Petrology of the Cueva Tuff and the Alkali Feldspar Granite Facies of the Organ Needle Pluton, Organ Mountains, Southern New Mexico	Thesis	Fitzpatrick, Delane Patricia		32.25	-106.567	0.1	34.4	33	31.6	ICP	IGNEOUS	VOLCANIC	FELSIC	TUFF		76.41	0.09	10.57		0.69					0.05	0.23	1.44		1.89	5.24
Tsc1		NAVDAT		Petrology of the Cueva Tuff and the Alkali Feldspar Granite Facies of the Organ Needle Pluton, Organ Mountains, Southern New Mexico	Thesis	Fitzpatrick, Delane Patricia		32.25	-106.567	0.1	34.4	33	31.6	ICP	IGNEOUS	VOLCANIC	FELSIC	TUFF		75.31	0.11	11.74		0.78					0.04	0.06	0.22		1.07	8.14
OM356		NAVDAT		Petrology of the Cueva Tuff and the Alkali Feldspar Granite Facies of the Organ Needle Pluton, Organ Mountains, Southern New Mexico	Thesis	Fitzpatrick, Delane Patricia		32.25	-106.567	0.1	34.4	33	31.6	ICP	IGNEOUS	VOLCANIC	FELSIC	TUFF		67.19	0.01	18.38		0.37					0	0	0.15		6.47	7.27
OM356		NAVDAT		Petrology of the Cueva Tuff and the Alkali Feldspar Granite Facies of the Organ Needle Pluton, Organ Mountains, Southern New Mexico	Thesis	Fitzpatrick, Delane Patricia		32.25	-106.567	0.1	34.4	33	31.6	ICP	IGNEOUS	VOLCANIC	FELSIC	TUFF		66.97		18.44		0.45					0	0	0.15		6.92	7.05
SCV 59		NAVDAT		Open-system magmatic evolution of andesites and basalts from theSalmon Creek Volcanics, southwestern Idaho, U.S.A.	Chemical Geology, vol.81, no.3, pp.167-189, 30 Jan 1990	Norman, Marc D; Leeman, William P		43.2894	-116.831	0.1	26	27.35	28.7	ICP	IGNEOUS	VOLCANIC	FELSIC	TUFF		56.26	1.01	17.24			6.97				0.11	4.66	7.05		4.49	1.74	0.47											51	20
SCV 59		NAVDAT		Open-system magmatic evolution of andesites and basalts from theSalmon Creek Volcanics, southwestern Idaho, U.S.A.	Chemical Geology, vol.81, no.3, pp.167-189, 30 Jan 1990	Norman, Marc D; Leeman, William P		43.2894	-116.831	0.1	26	27.35	28.7	INAA	IGNEOUS	VOLCANIC	FELSIC	TUFF
SCV 59		NAVDAT		Open-system magmatic evolution of andesites and basalts from theSalmon Creek Volcanics, southwestern Idaho, U.S.A.	Chemical Geology, vol.81, no.3, pp.167-189, 30 Jan 1990	Norman, Marc D; Leeman, William P		43.2894	-116.831	0.1	26	27.35	28.7	XRF	IGNEOUS	VOLCANIC	FELSIC	TUFF																														56
TssR15		NAVDAT		Geology and geochemistry of Precambrian rocks, central and South-central New Mexico	Memoir - New Mexico, Bureau of Mines and Mineral Resources, no.35, 58 pp., 1979	Condie, K C; Budding, A J		32.2957	-106.61	0.0001	35.6	35.46	35.32	UNKNOWN	IGNEOUS	VOLCANIC	FELSIC	TUFF								2.3							4.78														0.5
8238607-E		NAVDAT		Geology and geochemistry of Precambrian rocks, central and South-central New Mexico	Memoir - New Mexico, Bureau of Mines and Mineral Resources, no.35, 58 pp., 1979	Condie, K C; Budding, A J		32.2849	-106.587	0.0001	35.6	35.46	35.32	UNKNOWN	IGNEOUS	VOLCANIC	FELSIC	TUFF								1.05							3.4	5.39													0.1
TssA9		NAVDAT		Geology and geochemistry of Precambrian rocks, central and South-central New Mexico	Memoir - New Mexico, Bureau of Mines and Mineral Resources, no.35, 58 pp., 1979	Condie, K C; Budding, A J		32.2975	-106.592	0.0001	35.6	35.46	35.32	UNKNOWN	IGNEOUS	VOLCANIC	FELSIC	TUFF								1.19							4.26	6.5													0.1
Tss23		NAVDAT		Geology and geochemistry of Precambrian rocks, central and South-central New Mexico	Memoir - New Mexico, Bureau of Mines and Mineral Resources, no.35, 58 pp., 1979	Condie, K C; Budding, A J		32.3053	-106.599	0.001	35.6	35.46	35.32	UNKNOWN	IGNEOUS	VOLCANIC	FELSIC	TUFF								1.37							4.22														0.2
LC82-138		NAVDAT		Stratigraphic, lithologic, and major element geochemical constraintson magmatic evolution at Lassen volcanic center, California	Journal of Geophysical Research, vol.95, no.B12, pp.19,651-19,669, 10Nov 1990	Muffler, L J Patrick (prefacer)		40.4536	-121.355	0.0001	0.01	0.91	1.8	XRF	IGNEOUS	VOLCANIC	FELSIC	TUFF		57.4	0.63	18.4							0.1	4.28	6.66		2.89	1.7	0.14
I-841		NAVDAT		Geology and stratigraphy of the Mount Bennett Hills, and the origin ofwest-central Snake River plain rhyolites	Thesis or dissertation; Doctoral; Monographic	Honjo, Norio		42.6333	-115.8	1	10.8	12	13.2	MS	IGNEOUS	VOLCANIC	FELSIC	TUFF
TssR15		NAVDAT		Geochemistry and Nd-Se systematics of selected lithologic units of the oligocene organ cauldron and batholith, south central New Mexico	Thesis	Butcher, Donald Paul		32.2957	-106.61	0.0001	35.6	35.46	35.32	ICPAES	IGNEOUS	VOLCANIC	FELSIC	TUFF		68.43	0.64	16.45		2.48					0.05	0.38	0.51		4.76	6.46
TssR15		NAVDAT		Geochemistry and Nd-Se systematics of selected lithologic units of the oligocene organ cauldron and batholith, south central New Mexico	Thesis	Butcher, Donald Paul		32.2957	-106.61	0.0001	35.6	35.46	35.32	MS-ID	IGNEOUS	VOLCANIC	FELSIC	TUFF
TssA6		NAVDAT		Geochemistry and Nd-Se systematics of selected lithologic units of the oligocene organ cauldron and batholith, south central New Mexico	Thesis	Butcher, Donald Paul		32.2989	-106.587	0.01	35.6	35.46	35.32	ICPAES	IGNEOUS	VOLCANIC	FELSIC	TUFF		72.71	0.24	13.16		1.4					0.02	0.15	0.28		3.89	5.29
TssA6		NAVDAT		Geochemistry and Nd-Se systematics of selected lithologic units of the oligocene organ cauldron and batholith, south central New Mexico	Thesis	Butcher, Donald Paul		32.2989	-106.587	0.01	35.6	35.46	35.32	MS-ID	IGNEOUS	VOLCANIC	FELSIC	TUFF
TssA6		NAVDAT		Geology and geochemistry of Precambrian rocks, central and South-central New Mexico	Memoir - New Mexico, Bureau of Mines and Mineral Resources, no.35, 58 pp., 1979	Condie, K C; Budding, A J		32.2989	-106.587	0.01	35.6	35.46	35.32	UNKNOWN	IGNEOUS	VOLCANIC	FELSIC	TUFF								1.46							4.01	5.75													0.1
TssA11		NAVDAT		Geochemistry and Nd-Se systematics of selected lithologic units of the oligocene organ cauldron and batholith, south central New Mexico	Thesis	Butcher, Donald Paul		32.2949	-106.597	0.0001	35.6	35.46	35.32	ICPAES	IGNEOUS	VOLCANIC	FELSIC	TUFF		74.44	0.26	13.34		1.34					0.03	0.09	0.28		4.06	5.72
TssA11		NAVDAT		Geochemistry and Nd-Se systematics of selected lithologic units of the oligocene organ cauldron and batholith, south central New Mexico	Thesis	Butcher, Donald Paul		32.2949	-106.597	0.0001	35.6	35.46	35.32	MS-ID	IGNEOUS	VOLCANIC	FELSIC	TUFF
TssA11		NAVDAT		Geology and geochemistry of Precambrian rocks, central and South-central New Mexico	Memoir - New Mexico, Bureau of Mines and Mineral Resources, no.35, 58 pp., 1979	Condie, K C; Budding, A J		32.2949	-106.597	0.0001	35.6	35.46	35.32	UNKNOWN	IGNEOUS	VOLCANIC	FELSIC	TUFF								1.21							4.22														0.2
Tss28		NAVDAT		Geochemistry and Nd-Se systematics of selected lithologic units of the oligocene organ cauldron and batholith, south central New Mexico	Thesis	Butcher, Donald Paul		32.2961	-106.608	0.0001	35.6	35.46	35.32	ICPAES	IGNEOUS	VOLCANIC	FELSIC	TUFF		68.13	0.4	14.37		1.96					0.06	0.33	0.34		4.27	5.56
Tss28		NAVDAT		Geochemistry and Nd-Se systematics of selected lithologic units of the oligocene organ cauldron and batholith, south central New Mexico	Thesis	Butcher, Donald Paul		32.2961	-106.608	0.0001	35.6	35.46	35.32	MS-ID	IGNEOUS	VOLCANIC	FELSIC	TUFF
Tss28		NAVDAT		Geology and geochemistry of Precambrian rocks, central and South-central New Mexico	Memoir - New Mexico, Bureau of Mines and Mineral Resources, no.35, 58 pp., 1979	Condie, K C; Budding, A J		32.2961	-106.608	0.0001	35.6	35.46	35.32	UNKNOWN	IGNEOUS	VOLCANIC	FELSIC	TUFF								1.83							4.42														0.3
8238607-E		NAVDAT		Geochemistry and Nd-Se systematics of selected lithologic units of the oligocene organ cauldron and batholith, south central New Mexico	Thesis	Butcher, Donald Paul		32.2849	-106.587	0.0001	35.6	35.46	35.32	ICPAES	IGNEOUS	VOLCANIC	FELSIC	TUFF		70.57	0.14	12.95		0.96					0.03	0.13	0.27		3.26	6.11
13242301		NAVDAT		Geochemistry and Nd-Se systematics of selected lithologic units of the oligocene organ cauldron and batholith, south central New Mexico	Thesis	Butcher, Donald Paul		32.2989	-106.587	0.01	35.6	35.46	35.32	ICPAES	IGNEOUS	VOLCANIC	FELSIC	TUFF		74.2	0.27	13.58		0.93					0.03	0.23	0.17		2.98	5.8
13242301		NAVDAT		Geology and geochemistry of Precambrian rocks, central and South-central New Mexico	Memoir - New Mexico, Bureau of Mines and Mineral Resources, no.35, 58 pp., 1979	Condie, K C; Budding, A J		32.2989	-106.587	0.01	35.6	35.46	35.32	UNKNOWN	IGNEOUS	VOLCANIC	FELSIC	TUFF								1.01							3.1	6.07													0.5
13242302		NAVDAT		Geochemistry and Nd-Se systematics of selected lithologic units of the oligocene organ cauldron and batholith, south central New Mexico	Thesis	Butcher, Donald Paul		32.2989	-106.587	0.01	35.6	35.46	35.32	ICPAES	IGNEOUS	VOLCANIC	FELSIC	TUFF		74.83	0.27	13.56		1.12					0.03	0.33	0.22		2.9	5.8
13242302		NAVDAT		Geology and geochemistry of Precambrian rocks, central and South-central New Mexico	Memoir - New Mexico, Bureau of Mines and Mineral Resources, no.35, 58 pp., 1979	Condie, K C; Budding, A J		32.2989	-106.587	0.01	35.6	35.46	35.32	UNKNOWN	IGNEOUS	VOLCANIC	FELSIC	TUFF								1.11							2.84	5.61													0.5
TssA9		NAVDAT		Geochemistry and Nd-Se systematics of selected lithologic units of the oligocene organ cauldron and batholith, south central New Mexico	Thesis	Butcher, Donald Paul		32.2975	-106.592	0.0001	35.6	35.46	35.32	ICPAES	IGNEOUS	VOLCANIC	FELSIC	TUFF		74.39	0.27	13.33		1.19					0.02	0.12	0.08		4.07	4.97
TssA13		NAVDAT		Geochemistry and Nd-Se systematics of selected lithologic units of the oligocene organ cauldron and batholith, south central New Mexico	Thesis	Butcher, Donald Paul		32.2916	-106.598	0.0001	35.6	35.46	35.32	ICPAES	IGNEOUS	VOLCANIC	FELSIC	TUFF		72.25	0.26	13.18		1.53					0.05	0.1	0.1		3.41	6.17
TssA13		NAVDAT		Geology and geochemistry of Precambrian rocks, central and South-central New Mexico	Memoir - New Mexico, Bureau of Mines and Mineral Resources, no.35, 58 pp., 1979	Condie, K C; Budding, A J		32.2916	-106.598	0.0001	35.6	35.46	35.32	UNKNOWN	IGNEOUS	VOLCANIC	FELSIC	TUFF								1.31							3.48														0.2
TssR16		NAVDAT		Geochemistry and Nd-Se systematics of selected lithologic units of the oligocene organ cauldron and batholith, south central New Mexico	Thesis	Butcher, Donald Paul		32.2957	-106.61	0.001	35.6	35.46	35.32	ICPAES	IGNEOUS	VOLCANIC	FELSIC	TUFF		71.86	0.55	13.43		2.16					0.04	0.36	0.49		2.42	5.36
TssR16		NAVDAT		Geology and geochemistry of Precambrian rocks, central and South-central New Mexico	Memoir - New Mexico, Bureau of Mines and Mineral Resources, no.35, 58 pp., 1979	Condie, K C; Budding, A J		32.2957	-106.61	0.001	35.6	35.46	35.32	UNKNOWN	IGNEOUS	VOLCANIC	FELSIC	TUFF								1.91							2.31	4.8													0.4
Tss23		NAVDAT		Geochemistry and Nd-Se systematics of selected lithologic units of the oligocene organ cauldron and batholith, south central New Mexico	Thesis	Butcher, Donald Paul		32.3053	-106.599	0.001	35.6	35.46	35.32	ICPAES	IGNEOUS	VOLCANIC	FELSIC	TUFF		74.23	0.27	13.31		1.52					0.06	0.18	0.11		4.21	4.59
Tss25		NAVDAT		Geochemistry and Nd-Se systematics of selected lithologic units of the oligocene organ cauldron and batholith, south central New Mexico	Thesis	Butcher, Donald Paul		32.3017	-106.602	0.001	35.6	35.46	35.32	ICPAES	IGNEOUS	VOLCANIC	FELSIC	TUFF		73.24	0.28	13.29		1.67					0.06	0.22	0.13		3.57	5.15
Tss25		NAVDAT		Geology and geochemistry of Precambrian rocks, central and South-central New Mexico	Memoir - New Mexico, Bureau of Mines and Mineral Resources, no.35, 58 pp., 1979	Condie, K C; Budding, A J		32.3017	-106.602	0.001	35.6	35.46	35.32	UNKNOWN	IGNEOUS	VOLCANIC	FELSIC	TUFF								1.4							3.56														0.2
Tdai		NAVDAT		Geochemistry and Nd-Se systematics of selected lithologic units of the oligocene organ cauldron and batholith, south central New Mexico	Thesis	Butcher, Donald Paul		32.2917	-106.55	1	35.6	35.69	35.78	ICPAES	IGNEOUS	VOLCANIC	FELSIC	TUFF		74.07	0.37	14.57		1.6					0.024	0.21	0.24		2.98	5.96
Tdai-mid		NAVDAT		Geochemistry and Nd-Se systematics of selected lithologic units of the oligocene organ cauldron and batholith, south central New Mexico	Thesis	Butcher, Donald Paul		32.2917	-106.55	1	35.6	35.69	35.78	ICPAES	IGNEOUS	VOLCANIC	FELSIC	TUFF		72.62	0.4	15.23		1.84					0.034	0.19	0.35		4.98	4.41
TcfS5		NAVDAT		Geochemistry and Nd-Se systematics of selected lithologic units of the oligocene organ cauldron and batholith, south central New Mexico	Thesis	Butcher, Donald Paul		32.2847	-106.515	0.1	35.6	35.46	35.32	ICPAES	IGNEOUS	VOLCANIC	FELSIC	TUFF		72.9	0.18	14.66		1.25					0.075	0.08	0.54		4.56	5.3
TcS9		NAVDAT		Geochemistry and Nd-Se systematics of selected lithologic units of the oligocene organ cauldron and batholith, south central New Mexico	Thesis	Butcher, Donald Paul		32.225	-106.6	0.1	35.6	35.46	35.32	ICPAES	IGNEOUS	VOLCANIC	FELSIC	TUFF		69.73	0.5	15.68		3.85					0.07	0.5	0.79		2.65	4.19
Tsc1		NAVDAT		Geochemistry and Nd-Se systematics of selected lithologic units of the oligocene organ cauldron and batholith, south central New Mexico	Thesis	Butcher, Donald Paul		32.2917	-106.55	0.1	35.6	35.46	35.32	ICPAES	IGNEOUS	VOLCANIC	FELSIC	TUFF		75.31	0.1	11.74		0.78					0.044	0.06	0.22		1.07	8.14
TsaS10		NAVDAT		Geochemistry and Nd-Se systematics of selected lithologic units of the oligocene organ cauldron and batholith, south central New Mexico	Thesis	Butcher, Donald Paul		32.2872	-106.57	0.0001	35.6	35.46	35.32	ICPAES	IGNEOUS	VOLCANIC	FELSIC	TUFF		75.34	0.16	12.68		0.97					0.015	0.1	0.1		3.16	5.41
TsaS11		NAVDAT		Geochemistry and Nd-Se systematics of selected lithologic units of the oligocene organ cauldron and batholith, south central New Mexico	Thesis	Butcher, Donald Paul		32.2856	-106.574	0.0001	35.6	35.46	35.32	ICPAES	IGNEOUS	VOLCANIC	FELSIC	TUFF		75.53	0.16	12.88		1.09					0.02	0.12	0.19		3.6	5.39
TsaS12		NAVDAT		Geochemistry and Nd-Se systematics of selected lithologic units of the oligocene organ cauldron and batholith, south central New Mexico	Thesis	Butcher, Donald Paul		32.2858	-106.578	0.0001	35.6	35.46	35.32	ICPAES	IGNEOUS	VOLCANIC	FELSIC	TUFF		75.39	0.16	12.21		1.12					0.038	0.18	0.1		3.45	4.86
TsaS13		NAVDAT		Geochemistry and Nd-Se systematics of selected lithologic units of the oligocene organ cauldron and batholith, south central New Mexico	Thesis	Butcher, Donald Paul		32.2849	-106.585	0.0001	35.6	35.46	35.32	ICPAES	IGNEOUS	VOLCANIC	FELSIC	TUFF		75.5	0.16	12.26		1.07					0.034	0.11	0.24		3.19	5.63
TsaA4		NAVDAT		Geochemistry and Nd-Se systematics of selected lithologic units of the oligocene organ cauldron and batholith, south central New Mexico	Thesis	Butcher, Donald Paul		32.2989	-106.587	0.01	35.6	35.46	35.32	ICPAES	IGNEOUS	VOLCANIC	FELSIC	TUFF		74.25	0.15	12.03		1.13					0.066	0.05	2.18		3.51	4.23
TsaA5		NAVDAT		Geochemistry and Nd-Se systematics of selected lithologic units of the oligocene organ cauldron and batholith, south central New Mexico	Thesis	Butcher, Donald Paul		32.2989	-106.587	0.01	35.6	35.46	35.32	ICPAES	IGNEOUS	VOLCANIC	FELSIC	TUFF		78.69	0.15	11.72		1.1					0.045	0.2	0.47		2.53	4.5
Tgz		NAVDAT		Geochemistry and Nd-Se systematics of selected lithologic units of the oligocene organ cauldron and batholith, south central New Mexico	Thesis	Butcher, Donald Paul		32.2989	-106.587	0.01	35.6	35.46	35.32	ICPAES	IGNEOUS	VOLCANIC	FELSIC	TUFF		76.66	0.15	11.37		1.19					0.024	0.45	0.28		1.86	4.01
Trz		NAVDAT		Geochemistry and Nd-Se systematics of selected lithologic units of the oligocene organ cauldron and batholith, south central New Mexico	Thesis	Butcher, Donald Paul		32.2989	-106.587	0.01	35.6	35.46	35.32	ICPAES	IGNEOUS	VOLCANIC	FELSIC	TUFF		74.43	0.22	12.22		1.25					0.022	0.22	0.33		2.7	4.54
Tssaf		NAVDAT		Geochemistry and Nd-Se systematics of selected lithologic units of the oligocene organ cauldron and batholith, south central New Mexico	Thesis	Butcher, Donald Paul		32.2989	-106.587	0.01	35.6	35.46	35.32	ICPAES	IGNEOUS	VOLCANIC	FELSIC	TUFF		74.3	0.23	12.76		0.91					0.025	0.19	0.16		2.64	5.67
Tss2a		NAVDAT		Geochemistry and Nd-Se systematics of selected lithologic units of the oligocene organ cauldron and batholith, south central New Mexico	Thesis	Butcher, Donald Paul		32.2989	-106.587	0.01	35.6	35.46	35.32	ICPAES	IGNEOUS	VOLCANIC	FELSIC	TUFF		72.27	0.26	14.26		1.2					0.043	0.34	0.28		2.77	5.84
TssG		NAVDAT		Geochemistry and Nd-Se systematics of selected lithologic units of the oligocene organ cauldron and batholith, south central New Mexico	Thesis	Butcher, Donald Paul		32.2989	-106.587	0.01	35.6	35.46	35.32	ICPAES	IGNEOUS	VOLCANIC	FELSIC	TUFF		69.35	0.22	12.79		1.43					0.094	0.12	0.59		2.01	7.04
TssA7		NAVDAT		Geochemistry and Nd-Se systematics of selected lithologic units of the oligocene organ cauldron and batholith, south central New Mexico	Thesis	Butcher, Donald Paul		32.2994	-106.588	0.0001	35.6	35.46	35.32	ICPAES	IGNEOUS	VOLCANIC	FELSIC	TUFF		75.1	0.26	13.5		1.32					0.02	0.08	0.01		4.11	5.04
TssA8		NAVDAT		Geochemistry and Nd-Se systematics of selected lithologic units of the oligocene organ cauldron and batholith, south central New Mexico	Thesis	Butcher, Donald Paul		32.2987	-106.59	0.0001	35.6	35.46	35.32	ICPAES	IGNEOUS	VOLCANIC	FELSIC	TUFF		74.87	0.26	13.47		1.18					0.01	0.09	0.04		4.03	5.21
TssA10		NAVDAT		Geochemistry and Nd-Se systematics of selected lithologic units of the oligocene organ cauldron and batholith, south central New Mexico	Thesis	Butcher, Donald Paul		32.2964	-106.594	0.0001	35.6	35.46	35.32	ICPAES	IGNEOUS	VOLCANIC	FELSIC	TUFF		72.66	0.24	13.09		1.37					0.03	0.08	0.24		3.96	5.27
TssA12		NAVDAT		Geochemistry and Nd-Se systematics of selected lithologic units of the oligocene organ cauldron and batholith, south central New Mexico	Thesis	Butcher, Donald Paul		32.2923	-106.597	0.0001	35.6	35.46	35.32	ICPAES	IGNEOUS	VOLCANIC	FELSIC	TUFF		73.99	0.26	13.38		1.28					0.03	0.16	0.25		3.99	5.05
TssA14		NAVDAT		Geochemistry and Nd-Se systematics of selected lithologic units of the oligocene organ cauldron and batholith, south central New Mexico	Thesis	Butcher, Donald Paul		32.2907	-106.6	0.0001	35.6	35.46	35.32	ICPAES	IGNEOUS	VOLCANIC	FELSIC	TUFF		74.57	0.27	13.42		1.42					0.05	0.12	0.2		4.3	4.88
Tss21		NAVDAT		Geochemistry and Nd-Se systematics of selected lithologic units of the oligocene organ cauldron and batholith, south central New Mexico	Thesis	Butcher, Donald Paul		32.3053	-106.599	0.0001	35.6	35.46	35.32	ICPAES	IGNEOUS	VOLCANIC	FELSIC	TUFF		74.26	0.27	13.43		1.55					0.09	0.13	0.07		3.88	4.94
Tss24		NAVDAT		Geochemistry and Nd-Se systematics of selected lithologic units of the oligocene organ cauldron and batholith, south central New Mexico	Thesis	Butcher, Donald Paul		32.3025	-106.601	0.001	35.6	35.46	35.32	ICPAES	IGNEOUS	VOLCANIC	FELSIC	TUFF		74.15	0.26	13.16		1.54					0.08	0.17	0.1		3.46	5.28
Tss27		NAVDAT		Geochemistry and Nd-Se systematics of selected lithologic units of the oligocene organ cauldron and batholith, south central New Mexico	Thesis	Butcher, Donald Paul		32.2996	-106.607	0.0001	35.6	35.46	35.32	ICPAES	IGNEOUS	VOLCANIC	FELSIC	TUFF		68.88	0.35	13.88		1.84					0.06	0.42	0.12		3.46	5.68
Tss29		NAVDAT		Geochemistry and Nd-Se systematics of selected lithologic units of the oligocene organ cauldron and batholith, south central New Mexico	Thesis	Butcher, Donald Paul		32.2957	-106.61	0.001	35.6	35.46	35.32	ICPAES	IGNEOUS	VOLCANIC	FELSIC	TUFF		77.04	0.33	10.95		1.58					0.04	0.08	0.38		3.21	4.42
Tss30		NAVDAT		Geochemistry and Nd-Se systematics of selected lithologic units of the oligocene organ cauldron and batholith, south central New Mexico	Thesis	Butcher, Donald Paul		32.2957	-106.61	0.001	35.6	35.46	35.32	ICPAES	IGNEOUS	VOLCANIC	FELSIC	TUFF		72.3	0.51	13.06		2.05					0.07	0.2	0.99		3.81	5.14
Tss31p		NAVDAT		Geochemistry and Nd-Se systematics of selected lithologic units of the oligocene organ cauldron and batholith, south central New Mexico	Thesis	Butcher, Donald Paul		32.2957	-106.61	0.001	35.6	35.46	35.32	ICPAES	IGNEOUS	VOLCANIC	FELSIC	TUFF		72.11	0.5	13.29		2.04					0.056	0.35	0.43		2.36	5.55
Tss31w		NAVDAT		Geochemistry and Nd-Se systematics of selected lithologic units of the oligocene organ cauldron and batholith, south central New Mexico	Thesis	Butcher, Donald Paul		32.2957	-106.61	0.001	35.6	35.46	35.32	ICPAES	IGNEOUS	VOLCANIC	FELSIC	TUFF		70.27	0.56	14.5		2.14					0.072	0.44	0.53		2.46	5.83
CR3T		NAVDAT		Geochemistry and Nd-Se systematics of selected lithologic units of the oligocene organ cauldron and batholith, south central New Mexico	Thesis	Butcher, Donald Paul		32.3146	-106.58	0.001	35.6	35.46	35.32	ICPAES	IGNEOUS	VOLCANIC	FELSIC	TUFF		74.85	0.26	13.15		1.42					0.021	0.15	0.17		3.63	5.6
CR02		NAVDAT		Geochemistry and Nd-Se systematics of selected lithologic units of the oligocene organ cauldron and batholith, south central New Mexico	Thesis	Butcher, Donald Paul		32.3146	-106.58	0.0001	35.6	35.46	35.32	ICPAES	IGNEOUS	VOLCANIC	FELSIC	TUFF		75	0.26	13.22		1.38					0.033	0.14	0.21		4.08	5.43
CR1S		NAVDAT		Geochemistry and Nd-Se systematics of selected lithologic units of the oligocene organ cauldron and batholith, south central New Mexico	Thesis	Butcher, Donald Paul		32.3033	-106.574	0.0001	35.6	35.46	35.32	ICPAES	IGNEOUS	VOLCANIC	FELSIC	TUFF		74.29	0.26	12.98		1.55					0.108	0.1	0.29		4.25	5.51
CR2S		NAVDAT		Geochemistry and Nd-Se systematics of selected lithologic units of the oligocene organ cauldron and batholith, south central New Mexico	Thesis	Butcher, Donald Paul		32.3033	-106.574	0.0001	35.6	35.46	35.32	ICPAES	IGNEOUS	VOLCANIC	FELSIC	TUFF		74.44	0.03	13.32		1.54					0.087	0.09	0.27		4.31	5.59
F1		NAVDAT		Geochemistry and Nd-Se systematics of selected lithologic units of the oligocene organ cauldron and batholith, south central New Mexico	Thesis	Butcher, Donald Paul		32.3033	-106.574	0.1	35.6	35.46	35.32	ICPAES	IGNEOUS	VOLCANIC	FELSIC	TUFF		73.23	0.25	13.45		1.57					0.031	0.25	0.25		2.9	6.51
F2		NAVDAT		Geochemistry and Nd-Se systematics of selected lithologic units of the oligocene organ cauldron and batholith, south central New Mexico	Thesis	Butcher, Donald Paul		32.3033	-106.574	0.1	35.6	35.46	35.32	ICPAES	IGNEOUS	VOLCANIC	FELSIC	TUFF		73.87	0.16	12.84		1.2					0.01	0.17	0.07		1.87	7.53
F3		NAVDAT		Geochemistry and Nd-Se systematics of selected lithologic units of the oligocene organ cauldron and batholith, south central New Mexico	Thesis	Butcher, Donald Paul		32.3033	-106.574	0.1	35.6	35.46	35.32	ICPAES	IGNEOUS	VOLCANIC	FELSIC	TUFF		67.48	0.54	15.22		2.62					0.096	0.58	1.35		4.4	5.75
I-841		NAVDAT		Geology and stratigraphy of the Mount Bennett Hills, and the origin ofwest-central Snake River plain rhyolites	Thesis or dissertation; Doctoral; Monographic	Honjo, Norio		42.6333	-115.8	1	10.8	12	13.2	XRF	IGNEOUS	VOLCANIC	FELSIC	TUFF
NV11		NAVDAT		Oligocene ash flow volcanism, northern Sierra Madre Occidental; role of mafic and intermediate-composition magmas in rhyolite genesis	Journal of Geophysical Research, B, Solid Earth and Planets, vol.96, no.8, pp.13,389-13,411, 30 Jul 1991	Anonymous		28.33	-107.87	0.01	33.2	34.1	35	WET	IGNEOUS	VOLCANIC	FELSIC	TUFF		70.72	0.28	14.67		2.14		0.14			0.04	0.54	1.85		3.44	3.89	0.05				0.43	1.15
NV11		NAVDAT		Oligocene ash flow volcanism, northern Sierra Madre Occidental; role of mafic and intermediate-composition magmas in rhyolite genesis	Journal of Geophysical Research, B, Solid Earth and Planets, vol.96, no.8, pp.13,389-13,411, 30 Jul 1991	Anonymous		28.33	-107.87	0.01	33.2	34.1	35	NAA	IGNEOUS	VOLCANIC	FELSIC	TUFF																													3.8
NV11		NAVDAT		Oligocene ash flow volcanism, northern Sierra Madre Occidental; role of mafic and intermediate-composition magmas in rhyolite genesis	Journal of Geophysical Research, B, Solid Earth and Planets, vol.96, no.8, pp.13,389-13,411, 30 Jul 1991	Anonymous		28.33	-107.87	0.01	33.2	34.1	35	XRF	IGNEOUS	VOLCANIC	FELSIC	TUFF
NV01		NAVDAT		Oligocene ash flow volcanism, northern Sierra Madre Occidental; role of mafic and intermediate-composition magmas in rhyolite genesis	Journal of Geophysical Research, B, Solid Earth and Planets, vol.96, no.8, pp.13,389-13,411, 30 Jul 1991	Anonymous		28.33	-107.87	0.01	33.2	34.1	35	WET	IGNEOUS	VOLCANIC	FELSIC	TUFF		73.64	0.33	13.89		1.91		0.12			0.07	0.33	1.09		3.99	4.04	0.06				0.07	0.94
NV01		NAVDAT		Oligocene ash flow volcanism, northern Sierra Madre Occidental; role of mafic and intermediate-composition magmas in rhyolite genesis	Journal of Geophysical Research, B, Solid Earth and Planets, vol.96, no.8, pp.13,389-13,411, 30 Jul 1991	Anonymous		28.33	-107.87	0.01	33.2	34.1	35	NAA	IGNEOUS	VOLCANIC	FELSIC	TUFF																													1.3
NV01		NAVDAT		Oligocene ash flow volcanism, northern Sierra Madre Occidental; role of mafic and intermediate-composition magmas in rhyolite genesis	Journal of Geophysical Research, B, Solid Earth and Planets, vol.96, no.8, pp.13,389-13,411, 30 Jul 1991	Anonymous		28.33	-107.87	0.01	33.2	34.1	35	XRF	IGNEOUS	VOLCANIC	FELSIC	TUFF
NV07		NAVDAT		Oligocene ash flow volcanism, northern Sierra Madre Occidental; role of mafic and intermediate-composition magmas in rhyolite genesis	Journal of Geophysical Research, B, Solid Earth and Planets, vol.96, no.8, pp.13,389-13,411, 30 Jul 1991	Anonymous		28.33	-107.87	0.01	33.2	34.1	35	WET	IGNEOUS	VOLCANIC	FELSIC	TUFF		73.86	0.14	13.2		0.55		0.16			0.05	0.23	1.38		3.53	4.51	0.01				0.27	2.23
NV07		NAVDAT		Oligocene ash flow volcanism, northern Sierra Madre Occidental; role of mafic and intermediate-composition magmas in rhyolite genesis	Journal of Geophysical Research, B, Solid Earth and Planets, vol.96, no.8, pp.13,389-13,411, 30 Jul 1991	Anonymous		28.33	-107.87	0.01	33.2	34.1	35	TIMS	IGNEOUS	VOLCANIC	FELSIC	TUFF
NV07		NAVDAT		Oligocene ash flow volcanism, northern Sierra Madre Occidental; role of mafic and intermediate-composition magmas in rhyolite genesis	Journal of Geophysical Research, B, Solid Earth and Planets, vol.96, no.8, pp.13,389-13,411, 30 Jul 1991	Anonymous		28.33	-107.87	0.01	33.2	34.1	35	NAA	IGNEOUS	VOLCANIC	FELSIC	TUFF																													1.2
NV07		NAVDAT		Oligocene ash flow volcanism, northern Sierra Madre Occidental; role of mafic and intermediate-composition magmas in rhyolite genesis	Journal of Geophysical Research, B, Solid Earth and Planets, vol.96, no.8, pp.13,389-13,411, 30 Jul 1991	Anonymous		28.33	-107.87	0.01	33.2	34.1	35	TIMS	IGNEOUS	VOLCANIC	FELSIC	TUFF
NV07		NAVDAT		Oligocene ash flow volcanism, northern Sierra Madre Occidental; role of mafic and intermediate-composition magmas in rhyolite genesis	Journal of Geophysical Research, B, Solid Earth and Planets, vol.96, no.8, pp.13,389-13,411, 30 Jul 1991	Anonymous		28.33	-107.87	0.01	33.2	34.1	35	XRF	IGNEOUS	VOLCANIC	FELSIC	TUFF
N55		NAVDAT		Oligocene ash flow volcanism, northern Sierra Madre Occidental; role of mafic and intermediate-composition magmas in rhyolite genesis	Journal of Geophysical Research, B, Solid Earth and Planets, vol.96, no.8, pp.13,389-13,411, 30 Jul 1991	Anonymous		28.33	-107.87	0.01	31	31.7	32.4	WET	IGNEOUS	VOLCANIC	FELSIC	TUFF		65.97	0.62	14.14		2		1.04			0.09	0.83	2.38		3.96	2.98	0.12				0.71	4.69
N55		NAVDAT		Oligocene ash flow volcanism, northern Sierra Madre Occidental; role of mafic and intermediate-composition magmas in rhyolite genesis	Journal of Geophysical Research, B, Solid Earth and Planets, vol.96, no.8, pp.13,389-13,411, 30 Jul 1991	Anonymous		28.33	-107.87	0.01	31	31.7	32.4	TIMS	IGNEOUS	VOLCANIC	FELSIC	TUFF
N55		NAVDAT		Oligocene ash flow volcanism, northern Sierra Madre Occidental; role of mafic and intermediate-composition magmas in rhyolite genesis	Journal of Geophysical Research, B, Solid Earth and Planets, vol.96, no.8, pp.13,389-13,411, 30 Jul 1991	Anonymous		28.33	-107.87	0.01	31	31.7	32.4	NAA	IGNEOUS	VOLCANIC	FELSIC	TUFF																													5.2
N55		NAVDAT		Oligocene ash flow volcanism, northern Sierra Madre Occidental; role of mafic and intermediate-composition magmas in rhyolite genesis	Journal of Geophysical Research, B, Solid Earth and Planets, vol.96, no.8, pp.13,389-13,411, 30 Jul 1991	Anonymous		28.33	-107.87	0.01	31	31.7	32.4	TIMS	IGNEOUS	VOLCANIC	FELSIC	TUFF
N55		NAVDAT		Oligocene ash flow volcanism, northern Sierra Madre Occidental; role of mafic and intermediate-composition magmas in rhyolite genesis	Journal of Geophysical Research, B, Solid Earth and Planets, vol.96, no.8, pp.13,389-13,411, 30 Jul 1991	Anonymous		28.33	-107.87	0.01	31	31.7	32.4	XRF	IGNEOUS	VOLCANIC	FELSIC	TUFF
N57		NAVDAT		Oligocene ash flow volcanism, northern Sierra Madre Occidental; role of mafic and intermediate-composition magmas in rhyolite genesis	Journal of Geophysical Research, B, Solid Earth and Planets, vol.96, no.8, pp.13,389-13,411, 30 Jul 1991	Anonymous		28.33	-107.87	0.01	30	32	34	WET	IGNEOUS	VOLCANIC	FELSIC	TUFF		69.04	0.38	13.65		1.26		0.63			0.07	0.46	1.31		4.61	2.85	0.04				0.52	5.07
N57		NAVDAT		Oligocene ash flow volcanism, northern Sierra Madre Occidental; role of mafic and intermediate-composition magmas in rhyolite genesis	Journal of Geophysical Research, B, Solid Earth and Planets, vol.96, no.8, pp.13,389-13,411, 30 Jul 1991	Anonymous		28.33	-107.87	0.01	30	32	34	NAA	IGNEOUS	VOLCANIC	FELSIC	TUFF																													1
N57		NAVDAT		Oligocene ash flow volcanism, northern Sierra Madre Occidental; role of mafic and intermediate-composition magmas in rhyolite genesis	Journal of Geophysical Research, B, Solid Earth and Planets, vol.96, no.8, pp.13,389-13,411, 30 Jul 1991	Anonymous		28.33	-107.87	0.01	30	32	34	XRF	IGNEOUS	VOLCANIC	FELSIC	TUFF
N58		NAVDAT		Oligocene ash flow volcanism, northern Sierra Madre Occidental; role of mafic and intermediate-composition magmas in rhyolite genesis	Journal of Geophysical Research, B, Solid Earth and Planets, vol.96, no.8, pp.13,389-13,411, 30 Jul 1991	Anonymous		28.33	-107.87	0.01	30	32	34	NAA	IGNEOUS	VOLCANIC	FELSIC	TUFF																													1.9
N58		NAVDAT		Oligocene ash flow volcanism, northern Sierra Madre Occidental; role of mafic and intermediate-composition magmas in rhyolite genesis	Journal of Geophysical Research, B, Solid Earth and Planets, vol.96, no.8, pp.13,389-13,411, 30 Jul 1991	Anonymous		28.33	-107.87	0.01	30	32	34	XRF	IGNEOUS	VOLCANIC	FELSIC	TUFF
N60		NAVDAT		Oligocene ash flow volcanism, northern Sierra Madre Occidental; role of mafic and intermediate-composition magmas in rhyolite genesis	Journal of Geophysical Research, B, Solid Earth and Planets, vol.96, no.8, pp.13,389-13,411, 30 Jul 1991	Anonymous		28.33	-107.87	0.01	31	31.7	32.4	WET	IGNEOUS	VOLCANIC	FELSIC	TUFF		70.11	0.28	13.31		1.39		0.26			0.07	0.4	0.81		3.95	4.25	0.02				0.48	3.88
N60		NAVDAT		Oligocene ash flow volcanism, northern Sierra Madre Occidental; role of mafic and intermediate-composition magmas in rhyolite genesis	Journal of Geophysical Research, B, Solid Earth and Planets, vol.96, no.8, pp.13,389-13,411, 30 Jul 1991	Anonymous		28.33	-107.87	0.01	31	31.7	32.4	TIMS	IGNEOUS	VOLCANIC	FELSIC	TUFF
N60		NAVDAT		Oligocene ash flow volcanism, northern Sierra Madre Occidental; role of mafic and intermediate-composition magmas in rhyolite genesis	Journal of Geophysical Research, B, Solid Earth and Planets, vol.96, no.8, pp.13,389-13,411, 30 Jul 1991	Anonymous		28.33	-107.87	0.01	31	31.7	32.4	NAA	IGNEOUS	VOLCANIC	FELSIC	TUFF																													0.9
N60		NAVDAT		Oligocene ash flow volcanism, northern Sierra Madre Occidental; role of mafic and intermediate-composition magmas in rhyolite genesis	Journal of Geophysical Research, B, Solid Earth and Planets, vol.96, no.8, pp.13,389-13,411, 30 Jul 1991	Anonymous		28.33	-107.87	0.01	31	31.7	32.4	XRF	IGNEOUS	VOLCANIC	FELSIC	TUFF
N62		NAVDAT		Oligocene ash flow volcanism, northern Sierra Madre Occidental; role of mafic and intermediate-composition magmas in rhyolite genesis	Journal of Geophysical Research, B, Solid Earth and Planets, vol.96, no.8, pp.13,389-13,411, 30 Jul 1991	Anonymous		28.33	-107.87	0.01	31	31.7	32.4	NAA	IGNEOUS	VOLCANIC	FELSIC	TUFF																													0.66
C18		NAVDAT		Oligocene ash flow volcanism, northern Sierra Madre Occidental; role of mafic and intermediate-composition magmas in rhyolite genesis	Journal of Geophysical Research, B, Solid Earth and Planets, vol.96, no.8, pp.13,389-13,411, 30 Jul 1991	Anonymous		28.33	-107.87	0.01	27	29	31	TIMS	IGNEOUS	VOLCANIC	FELSIC	TUFF
O59		NAVDAT		Oligocene ash flow volcanism, northern Sierra Madre Occidental; role of mafic and intermediate-composition magmas in rhyolite genesis	Journal of Geophysical Research, B, Solid Earth and Planets, vol.96, no.8, pp.13,389-13,411, 30 Jul 1991	Anonymous		28.33	-107.87	0.01	27	29	31	TIMS	IGNEOUS	VOLCANIC	FELSIC	TUFF
S4 (=N60)		NAVDAT		Oligocene ash flow volcanism, northern Sierra Madre Occidental; role of mafic and intermediate-composition magmas in rhyolite genesis	Journal of Geophysical Research, B, Solid Earth and Planets, vol.96, no.8, pp.13,389-13,411, 30 Jul 1991	Anonymous		28.33	-107.87	0.01	29.4	31.4	33.4	TIMS	IGNEOUS	VOLCANIC	FELSIC	TUFF
S17 (=O04)		NAVDAT		Oligocene ash flow volcanism, northern Sierra Madre Occidental; role of mafic and intermediate-composition magmas in rhyolite genesis	Journal of Geophysical Research, B, Solid Earth and Planets, vol.96, no.8, pp.13,389-13,411, 30 Jul 1991	Anonymous		28.33	-107.87	0.01	34.6	36.6	38.6	TIMS	IGNEOUS	VOLCANIC	FELSIC	TUFF
S17 (=O04)		NAVDAT		Oligocene ash flow volcanism, northern Sierra Madre Occidental; role of mafic and intermediate-composition magmas in rhyolite genesis	Journal of Geophysical Research, B, Solid Earth and Planets, vol.96, no.8, pp.13,389-13,411, 30 Jul 1991	Anonymous		28.33	-107.87	0.01	34.6	36.6	38.6	TIMS	IGNEOUS	VOLCANIC	FELSIC	TUFF
O04		NAVDAT		Oligocene ash flow volcanism, northern Sierra Madre Occidental; role of mafic and intermediate-composition magmas in rhyolite genesis	Journal of Geophysical Research, B, Solid Earth and Planets, vol.96, no.8, pp.13,389-13,411, 30 Jul 1991	Anonymous		28.33	-107.87	0.01	34.6	36.6	38.6	TIMS	IGNEOUS	VOLCANIC	FELSIC	TUFF
O04		NAVDAT		Oligocene ash flow volcanism, northern Sierra Madre Occidental; role of mafic and intermediate-composition magmas in rhyolite genesis	Journal of Geophysical Research, B, Solid Earth and Planets, vol.96, no.8, pp.13,389-13,411, 30 Jul 1991	Anonymous		28.33	-107.87	0.01	34.6	36.6	38.6	NAA	IGNEOUS	VOLCANIC	FELSIC	TUFF
62-T		NAVDAT		Geologic map of the Hart Peak Quadrangle, California and Nevada.	Open-File Report - U. S. Geological Survey, Report: OF 98-0470, 12 pp., 1 sheet, 1998	Nielson, Jane E; Turner, Ryan D		35.3653	-115.056	0.001	15.7	16.1	16.5	GRAV	IGNEOUS	VOLCANIC	FELSIC	TUFF						1.41
62-T		NAVDAT		Miocene volcanism, folding, and faulting in the Castle Mountains, southern Nevada and eastern California	Memoir - Geological Society of America, vol.176, pp.23-35, 1990	Turner, Ryan D; Glazner, Allen F		35.3653	-115.056	0.001	15.7	16.1	16.5	XRF	IGNEOUS	VOLCANIC	FELSIC	TUFF
62-T		NAVDAT		Miocene volcanism, folding, and faulting in the Castle Mountains, southern Nevada and eastern California	Memoir - Geological Society of America, vol.176, pp.23-35, 1990	Turner, Ryan D; Glazner, Allen F		35.3653	-115.056	0.001	15.7	16.1	16.5	UNKNOWN	IGNEOUS	VOLCANIC	FELSIC	TUFF		70.4	0.31	13.9				1.52			0.04	0.53	1.12		3.44	6.56	0.1				0.01	0.68
178-T		NAVDAT		Miocene volcanism, folding, and faulting in the Castle Mountains, southern Nevada and eastern California	Memoir - Geological Society of America, vol.176, pp.23-35, 1990	Turner, Ryan D; Glazner, Allen F		35.3203	-115.055	0.001	18	18.5	19	UNKNOWN	IGNEOUS	VOLCANIC	FELSIC	TUFF		74.6	0.24	12.7							0.05	0.22	0.43		2.66	5.27	0.05				0.27	0.89
I-841		NAVDAT		Geology and stratigraphy of the Mount Bennett Hills, and the origin ofwest-central Snake River plain rhyolites	Thesis or dissertation; Doctoral; Monographic	Honjo, Norio		42.6333	-115.8	1	10.8	12	13.2	INAA	IGNEOUS	VOLCANIC	FELSIC	TUFF																													2.7
I-569		NAVDAT		Geology and stratigraphy of the Mount Bennett Hills, and the origin ofwest-central Snake River plain rhyolites	Thesis or dissertation; Doctoral; Monographic	Honjo, Norio		42.6333	-115.8	1	10.8	12	13.2	INAA	IGNEOUS	VOLCANIC	FELSIC	TUFF																													0.6
I-569		NAVDAT		Geology and stratigraphy of the Mount Bennett Hills, and the origin ofwest-central Snake River plain rhyolites	Thesis or dissertation; Doctoral; Monographic	Honjo, Norio		42.6333	-115.8	1	10.8	12	13.2	MS	IGNEOUS	VOLCANIC	FELSIC	TUFF
I-569		NAVDAT		Geology and stratigraphy of the Mount Bennett Hills, and the origin ofwest-central Snake River plain rhyolites	Thesis or dissertation; Doctoral; Monographic	Honjo, Norio		42.6333	-115.8	1	10.8	12	13.2	XRF	IGNEOUS	VOLCANIC	FELSIC	TUFF
I-569		NAVDAT		Geology and stratigraphy of the Mount Bennett Hills, and the origin ofwest-central Snake River plain rhyolites	Thesis or dissertation; Doctoral; Monographic	Honjo, Norio		42.6333	-115.8	1	10.8	12	13.2	ICP	IGNEOUS	VOLCANIC	FELSIC	TUFF		76.59	0.15	12.62			1.44				0.02	0.36	0.64		2.56	5.61	0.02
I-841		NAVDAT		Geology and stratigraphy of the Mount Bennett Hills, and the origin ofwest-central Snake River plain rhyolites	Thesis or dissertation; Doctoral; Monographic	Honjo, Norio		42.6333	-115.8	1	10.8	12	13.2	ICP	IGNEOUS	VOLCANIC	FELSIC	TUFF		73.06	0.49	12.97			3.31				0.05	0.42	1.35		2.51	5.76	0.09
I-459		NAVDAT		Geology and stratigraphy of the Mount Bennett Hills, and the origin ofwest-central Snake River plain rhyolites	Thesis or dissertation; Doctoral; Monographic	Honjo, Norio		42.6333	-115.8	1	10.8	12	13.2	INAA	IGNEOUS	VOLCANIC	FELSIC	TUFF																													2.2
I-459		NAVDAT		Geology and stratigraphy of the Mount Bennett Hills, and the origin ofwest-central Snake River plain rhyolites	Thesis or dissertation; Doctoral; Monographic	Honjo, Norio		42.6333	-115.8	1	10.8	12	13.2	MS	IGNEOUS	VOLCANIC	FELSIC	TUFF
I-459		NAVDAT		Geology and stratigraphy of the Mount Bennett Hills, and the origin ofwest-central Snake River plain rhyolites	Thesis or dissertation; Doctoral; Monographic	Honjo, Norio		42.6333	-115.8	1	10.8	12	13.2	XRF	IGNEOUS	VOLCANIC	FELSIC	TUFF
I-459		NAVDAT		Geology and stratigraphy of the Mount Bennett Hills, and the origin ofwest-central Snake River plain rhyolites	Thesis or dissertation; Doctoral; Monographic	Honjo, Norio		42.6333	-115.8	1	10.8	12	13.2	ICP	IGNEOUS	VOLCANIC	FELSIC	TUFF		73.63	0.42	12.83			3.06				0.05	0.5	1.4		2.89	5.16	0.06
L80-78		NAVDAT		Geology and stratigraphy of the Mount Bennett Hills, and the origin ofwest-central Snake River plain rhyolites	Thesis or dissertation; Doctoral; Monographic	Honjo, Norio		43.2067	-115.008	1	8.28	9.2	10.12	INAA	IGNEOUS	VOLCANIC	FELSIC	TUFF																													6.5
L80-78		NAVDAT		Geology and stratigraphy of the Mount Bennett Hills, and the origin ofwest-central Snake River plain rhyolites	Thesis or dissertation; Doctoral; Monographic	Honjo, Norio		43.2067	-115.008	1	8.28	9.2	10.12	MS	IGNEOUS	VOLCANIC	FELSIC	TUFF
L80-78		NAVDAT		Geology and stratigraphy of the Mount Bennett Hills, and the origin ofwest-central Snake River plain rhyolites	Thesis or dissertation; Doctoral; Monographic	Honjo, Norio		43.2067	-115.008	1	8.28	9.2	10.12	XRF	IGNEOUS	VOLCANIC	FELSIC	TUFF
L80-78		NAVDAT		Geology and stratigraphy of the Mount Bennett Hills, and the origin ofwest-central Snake River plain rhyolites	Thesis or dissertation; Doctoral; Monographic	Honjo, Norio		43.2067	-115.008	1	8.28	9.2	10.12	ICP	IGNEOUS	VOLCANIC	FELSIC	TUFF		69.94	0.79	13.42			4.63				0.07	0.84	2.34		3.03	4.77	0.17
9YC496A		NAVDAT		Geology and stratigraphy of the Mount Bennett Hills, and the origin ofwest-central Snake River plain rhyolites	Thesis or dissertation; Doctoral; Monographic	Honjo, Norio		44.4336	-110.714	1	0.54	0.6	0.66	INAA	IGNEOUS	VOLCANIC	FELSIC	TUFF																													0.5
9YC496A		NAVDAT		Geology and stratigraphy of the Mount Bennett Hills, and the origin ofwest-central Snake River plain rhyolites	Thesis or dissertation; Doctoral; Monographic	Honjo, Norio		44.4336	-110.714	1	0.54	0.6	0.66	MS	IGNEOUS	VOLCANIC	FELSIC	TUFF
9YC496A		NAVDAT		Geology and stratigraphy of the Mount Bennett Hills, and the origin ofwest-central Snake River plain rhyolites	Thesis or dissertation; Doctoral; Monographic	Honjo, Norio		44.4336	-110.714	1	0.54	0.6	0.66	XRF	IGNEOUS	VOLCANIC	FELSIC	TUFF
9YC496A		NAVDAT		Geology and stratigraphy of the Mount Bennett Hills, and the origin ofwest-central Snake River plain rhyolites	Thesis or dissertation; Doctoral; Monographic	Honjo, Norio		44.4336	-110.714	1	0.54	0.6	0.66	ICP	IGNEOUS	VOLCANIC	FELSIC	TUFF		76.49	0.23	11.71			1.9				0.05	0.15	0.56		2.75	5.57	0.01
YG70-13		NAVDAT		Geology and stratigraphy of the Mount Bennett Hills, and the origin ofwest-central Snake River plain rhyolites	Thesis or dissertation; Doctoral; Monographic	Honjo, Norio		44.4336	-110.714	1	0.063	0.07	0.077	INAA	IGNEOUS	VOLCANIC	FELSIC	TUFF																													0.1
YG70-13		NAVDAT		Geology and stratigraphy of the Mount Bennett Hills, and the origin ofwest-central Snake River plain rhyolites	Thesis or dissertation; Doctoral; Monographic	Honjo, Norio		44.4336	-110.714	1	0.063	0.07	0.077	MS	IGNEOUS	VOLCANIC	FELSIC	TUFF
YG70-13		NAVDAT		Geology and stratigraphy of the Mount Bennett Hills, and the origin ofwest-central Snake River plain rhyolites	Thesis or dissertation; Doctoral; Monographic	Honjo, Norio		44.4336	-110.714	1	0.063	0.07	0.077	XRF	IGNEOUS	VOLCANIC	FELSIC	TUFF
YG70-13		NAVDAT		Geology and stratigraphy of the Mount Bennett Hills, and the origin ofwest-central Snake River plain rhyolites	Thesis or dissertation; Doctoral; Monographic	Honjo, Norio		44.4336	-110.714	1	0.063	0.07	0.077	ICP	IGNEOUS	VOLCANIC	FELSIC	TUFF		76.96	0.12	11.85			1.74				0.04	0.01	0.48		3.82	4.92
6YC-135		NAVDAT		Geology and stratigraphy of the Mount Bennett Hills, and the origin ofwest-central Snake River plain rhyolites	Thesis or dissertation; Doctoral; Monographic	Honjo, Norio		44.4336	-110.714	1	0.36	0.4	0.44	INAA	IGNEOUS	VOLCANIC	FELSIC	TUFF																													0.3
6YC-135		NAVDAT		Geology and stratigraphy of the Mount Bennett Hills, and the origin ofwest-central Snake River plain rhyolites	Thesis or dissertation; Doctoral; Monographic	Honjo, Norio		44.4336	-110.714	1	0.36	0.4	0.44	MS	IGNEOUS	VOLCANIC	FELSIC	TUFF
6YC-135		NAVDAT		Geology and stratigraphy of the Mount Bennett Hills, and the origin ofwest-central Snake River plain rhyolites	Thesis or dissertation; Doctoral; Monographic	Honjo, Norio		44.4336	-110.714	1	0.36	0.4	0.44	XRF	IGNEOUS	VOLCANIC	FELSIC	TUFF
6YC-135		NAVDAT		Geology and stratigraphy of the Mount Bennett Hills, and the origin ofwest-central Snake River plain rhyolites	Thesis or dissertation; Doctoral; Monographic	Honjo, Norio		44.4336	-110.714	1	0.36	0.4	0.44	ICP	IGNEOUS	VOLCANIC	FELSIC	TUFF		75.62	0.17	12.3			2.01				0.02	0.2	0.72		4.01	4.52	0.02
OCB66-06		NAVDAT		Geology and stratigraphy of the Mount Bennett Hills, and the origin ofwest-central Snake River plain rhyolites	Thesis or dissertation; Doctoral; Monographic	Honjo, Norio		44.4336	-110.714	1	0.153	0.17	0.187	INAA	IGNEOUS	VOLCANIC	FELSIC	TUFF																													0.4
OCB66-06		NAVDAT		Geology and stratigraphy of the Mount Bennett Hills, and the origin ofwest-central Snake River plain rhyolites	Thesis or dissertation; Doctoral; Monographic	Honjo, Norio		44.4336	-110.714	1	0.153	0.17	0.187	MS	IGNEOUS	VOLCANIC	FELSIC	TUFF
OCB66-06		NAVDAT		Geology and stratigraphy of the Mount Bennett Hills, and the origin ofwest-central Snake River plain rhyolites	Thesis or dissertation; Doctoral; Monographic	Honjo, Norio		44.4336	-110.714	1	0.153	0.17	0.187	XRF	IGNEOUS	VOLCANIC	FELSIC	TUFF
OCB66-06		NAVDAT		Geology and stratigraphy of the Mount Bennett Hills, and the origin ofwest-central Snake River plain rhyolites	Thesis or dissertation; Doctoral; Monographic	Honjo, Norio		44.4336	-110.714	1	0.153	0.17	0.187	ICP	IGNEOUS	VOLCANIC	FELSIC	TUFF		76.84	0.08	12.06			1.4				0.03	0.03	0.45		3.92	5.03
3S003		NAVDAT		Petrogenesis of compositionally distinct silicic volcanoes in theThree Sisters region of the Oregon Cascade Range; the effects ofcrustal extension on the development of continental arc silicicmagmatism	Thesis or dissertation; Doctoral; Monographic	Hill, Brittain Eames		44.1102	-121.489	0.001	0.34	0.49	0.63	INAA	IGNEOUS	VOLCANIC	FELSIC	TUFF																												7	11.6
3S003		NAVDAT		Petrogenesis of compositionally distinct silicic volcanoes in theThree Sisters region of the Oregon Cascade Range; the effects ofcrustal extension on the development of continental arc silicicmagmatism	Thesis or dissertation; Doctoral; Monographic	Hill, Brittain Eames		44.1102	-121.489	0.001	0.34	0.49	0.63	XRF	IGNEOUS	VOLCANIC	FELSIC	TUFF		61.5	1.28	17.6					6.53		0.22	1.5	3.83		5.16	1.65	0.47
3S094		NAVDAT		Petrogenesis of compositionally distinct silicic volcanoes in theThree Sisters region of the Oregon Cascade Range; the effects ofcrustal extension on the development of continental arc silicicmagmatism	Thesis or dissertation; Doctoral; Monographic	Hill, Brittain Eames		44.0932	-121.67	0.001	0.11	0.17	0.222	INAA	IGNEOUS	VOLCANIC	FELSIC	TUFF																												8	2.18
3S094		NAVDAT		Petrogenesis of compositionally distinct silicic volcanoes in theThree Sisters region of the Oregon Cascade Range; the effects ofcrustal extension on the development of continental arc silicicmagmatism	Thesis or dissertation; Doctoral; Monographic	Hill, Brittain Eames		44.0932	-121.67	0.001	0.11	0.17	0.222	XRF	IGNEOUS	VOLCANIC	FELSIC	TUFF		67.2	0.79	16					3.79		0.12	0.9	2.46		6.15	2.27	0.2
LR89-013pum		NAVDAT		The determination of 30 elements in geological materials by energy dispersion X-ray fluorescence spectrometry.	Open-File Report - U. S. Geological Survey. Pages U1-U11. 2002. .	Siems-David-F		38.0994	-106.983	0.0001	25.9	26.5	27.1	XRF	IGNEOUS	VOLCANIC	FELSIC	TUFF
LR89-013pum		NAVDAT		Analysis of geologic materials by wavelength-dispersive X-ray fluorescence spectrometry.	U. S. Geological Survey Bulletin. Pages E1-E19. 1987. .	Taggart-Joseph-E Jr.; Lindsay-J-R; Scott-B-A; Vivit-Davison-V; Bartel-A-J; Stewart-Kathleen-C		38.0994	-106.983	0.0001	25.9	26.5	27.1	XRF	IGNEOUS	VOLCANIC	FELSIC	TUFF		66.21	0.6	15.83		4.54					0.04	0.89	3.19		3.7	4.21	0.26		0.45
LR89-014p		NAVDAT		The determination of 30 elements in geological materials by energy dispersion X-ray fluorescence spectrometry.	Open-File Report - U. S. Geological Survey. Pages U1-U11. 2002. .	Siems-David-F		38.0983	-106.985	0.0001	26	26.6	27.1	XRF	IGNEOUS	VOLCANIC	FELSIC	TUFF
LR89-014p		NAVDAT		Analysis of geologic materials by wavelength-dispersive X-ray fluorescence spectrometry.	U. S. Geological Survey Bulletin. Pages E1-E19. 1987. .	Taggart-Joseph-E Jr.; Lindsay-J-R; Scott-B-A; Vivit-Davison-V; Bartel-A-J; Stewart-Kathleen-C		38.0983	-106.985	0.0001	26	26.6	27.1	XRF	IGNEOUS	VOLCANIC	FELSIC	TUFF		65.03	0.617396	16.3458		4.84808					0.0910912	1.55867	3.63353		3.60316	4.16995	0.273274		1.2
LR89-014p		NAVDAT		Instrumental neutron activation by abbreviated count.	Open-File Report - U. S. Geological Survey. Pages Y1-Y9. 2002. .	Budahn-James-R; Wandless-Gregory-A		38.0983	-106.985	0.0001	26	26.6	27.1	INAA	IGNEOUS	VOLCANIC	FELSIC	TUFF																												6.18	7.17
LR87-719-6		NAVDAT		The determination of 30 elements in geological materials by energy dispersion X-ray fluorescence spectrometry.	Open-File Report - U. S. Geological Survey. Pages U1-U11. 2002. .	Siems-David-F		37.9156	-106.96	0.0001	28	31.5	35	XRF	IGNEOUS	VOLCANIC	FELSIC	TUFF
LR87-719-6		NAVDAT		Analysis of geologic materials by wavelength-dispersive X-ray fluorescence spectrometry.	U. S. Geological Survey Bulletin. Pages E1-E19. 1987. .	Taggart-Joseph-E Jr.; Lindsay-J-R; Scott-B-A; Vivit-Davison-V; Bartel-A-J; Stewart-Kathleen-C		37.9156	-106.96	0.0001	28	31.5	35	XRF	IGNEOUS	VOLCANIC	FELSIC	TUFF		70.7	0.4	14.29		2.9					0.03	0.58	1.7		3.4	5.2	0.15		0.33
3-26-89-5		NAVDAT		New K-Ar ages from tuffs in the Etchegoin Formation, San Joaquin Basin, California	Isochron/West, vol.58, pp.3-7, Mar 1992	Loomis, Karen B		35.9906	-120.262	0.001	3.7	4.2	4.7	EPMA	IGNEOUS	VOLCANIC	FELSIC	TUFF		71.83	0.12	11.62				0.77			0	0	0.71		1.96	4.33
3-26-89-6		NAVDAT		New K-Ar ages from tuffs in the Etchegoin Formation, San Joaquin Basin, California	Isochron/West, vol.58, pp.3-7, Mar 1992	Loomis, Karen B		36.015	-120.286	0.001	4.7	5	5.3	EPMA	IGNEOUS	VOLCANIC	FELSIC	TUFF		72.1	0.08	11.9				0.69			0	0	0.77		2.74	4.59
3-27-89-10		NAVDAT		New K-Ar ages from tuffs in the Etchegoin Formation, San Joaquin Basin, California	Isochron/West, vol.58, pp.3-7, Mar 1992	Loomis, Karen B		36.0353	-120.375	0.001	7.2	8.1	9	EPMA	IGNEOUS	VOLCANIC	FELSIC	TUFF		72.14	0.03	11.72				1.14			0.02	0	0.8		1.96	4.25
G-15A		NAVDAT		Strontium and neodymium isotopic study of the western Mogollon-Datil volcanic region, New Mexico, USA.	Contributions to Mineralogy and Petrology. 109; 4, Pages 459-470. 1992. .	Bikerman-Michael; Bell-Keith; Card-Jeffrey-W		33.78	-108.53	0.01	25.83	28.7	31.57	XRF	IGNEOUS	VOLCANIC	FELSIC	TUFF		71.7	0.32	13.4		1.9					0.061	0.33	1.1		3.3	5.5	0.14											13		11
G-15A		NAVDAT		Strontium and neodymium isotopic study of the western Mogollon-Datil volcanic region, New Mexico, USA.	Contributions to Mineralogy and Petrology. 109; 4, Pages 459-470. 1992. .	Bikerman-Michael; Bell-Keith; Card-Jeffrey-W		33.78	-108.53	0.01	25.83	28.7	31.57	MS	IGNEOUS	VOLCANIC	FELSIC	TUFF
G-15A		NAVDAT		Strontium and neodymium isotopic study of the western Mogollon-Datil volcanic region, New Mexico, USA.	Contributions to Mineralogy and Petrology. 109; 4, Pages 459-470. 1992. .	Bikerman-Michael; Bell-Keith; Card-Jeffrey-W		33.78	-108.53	0.01	25.83	28.7	31.57	NAA	IGNEOUS	VOLCANIC	FELSIC	TUFF
G-15A		NAVDAT		Strontium and neodymium isotopic study of the western Mogollon-Datil volcanic region, New Mexico, USA.	Contributions to Mineralogy and Petrology. 109; 4, Pages 459-470. 1992. .	Bikerman-Michael; Bell-Keith; Card-Jeffrey-W		33.78	-108.53	0.01	25.83	28.7	31.57	XRF	IGNEOUS	VOLCANIC	FELSIC	TUFF
G-15A		NAVDAT		Strontium and neodymium isotopic study of the western Mogollon-Datil volcanic region, New Mexico, USA.	Contributions to Mineralogy and Petrology. 109; 4, Pages 459-470. 1992. .	Bikerman-Michael; Bell-Keith; Card-Jeffrey-W		33.78	-108.53	0.01	25.83	28.7	31.57	MS-ID	IGNEOUS	VOLCANIC	FELSIC	TUFF
G-58		NAVDAT		Strontium and neodymium isotopic study of the western Mogollon-Datil volcanic region, New Mexico, USA.	Contributions to Mineralogy and Petrology. 109; 4, Pages 459-470. 1992. .	Bikerman-Michael; Bell-Keith; Card-Jeffrey-W		33.63	-109.03	0.01	27.09	30.1	33.11	MS	IGNEOUS	VOLCANIC	FELSIC	TUFF
G-58		NAVDAT		Strontium and neodymium isotopic study of the western Mogollon-Datil volcanic region, New Mexico, USA.	Contributions to Mineralogy and Petrology. 109; 4, Pages 459-470. 1992. .	Bikerman-Michael; Bell-Keith; Card-Jeffrey-W		33.63	-109.03	0.01	27.09	30.1	33.11	XRF	IGNEOUS	VOLCANIC	FELSIC	TUFF
G-31		NAVDAT		Strontium and neodymium isotopic study of the western Mogollon-Datil volcanic region, New Mexico, USA.	Contributions to Mineralogy and Petrology. 109; 4, Pages 459-470. 1992. .	Bikerman-Michael; Bell-Keith; Card-Jeffrey-W		33.9	-108.25	0.01	28.98	32.2	35.42	XRF	IGNEOUS	VOLCANIC	FELSIC	TUFF		71.5	0.36	13.3		2.4					0.063	0.5	1.2		2.9	5.7	0.082
G-31		NAVDAT		Strontium and neodymium isotopic study of the western Mogollon-Datil volcanic region, New Mexico, USA.	Contributions to Mineralogy and Petrology. 109; 4, Pages 459-470. 1992. .	Bikerman-Michael; Bell-Keith; Card-Jeffrey-W		33.9	-108.25	0.01	28.98	32.2	35.42	MS	IGNEOUS	VOLCANIC	FELSIC	TUFF
G-31		NAVDAT		Strontium and neodymium isotopic study of the western Mogollon-Datil volcanic region, New Mexico, USA.	Contributions to Mineralogy and Petrology. 109; 4, Pages 459-470. 1992. .	Bikerman-Michael; Bell-Keith; Card-Jeffrey-W		33.9	-108.25	0.01	28.98	32.2	35.42	XRF	IGNEOUS	VOLCANIC	FELSIC	TUFF
BE-546		NAVDAT		High-temperature, large-volume, lavalike ash-flow tuffs withoutcalderas in southwestern Idaho	U. S. Geological Survey Professional Paper, Report: P 1272, 76 pp.,1984	Ekren, E B; McIntyre, D H; Bennett, E H		42.3125	-116.85	0.01	13.3	13.8	14.3	XRF	IGNEOUS	VOLCANIC	FELSIC	TUFF		73.79	0.34	12.56		2.48		0.16			0.039	0	0.65		3.06	5.58	0.06				0.52	0.28
BE-487		NAVDAT		High-temperature, large-volume, lavalike ash-flow tuffs withoutcalderas in southwestern Idaho	U. S. Geological Survey Professional Paper, Report: P 1272, 76 pp.,1984	Ekren, E B; McIntyre, D H; Bennett, E H		42.25	-116.75	0.1	11.8	12	12.2	XRF	IGNEOUS	VOLCANIC	FELSIC	TUFF		75.22	0.29	12.65		1.85		0.17			0.026	0.04	0.74		3.02	5.48	0.08				0.38	0.27
89-DJ-2		NAVDAT		Tilted middle Tertiary ash-flow calderas and subjacent granitic plutons, southern Stillwater Range, Nevada; cross sections of an Oligocene igneous center.	Geological Society of America Bulletin. 107; 2, Pages 180-200. 1995.	John-David-A		39.625	-118.25	0.1	23.8	24.6	25.4	EDXRF	IGNEOUS	VOLCANIC	FELSIC	TUFF																												< 20		< 20
89-DJ-2		NAVDAT		Tilted middle Tertiary ash-flow calderas and subjacent granitic plutons, southern Stillwater Range, Nevada; cross sections of an Oligocene igneous center.	Geological Society of America Bulletin. 107; 2, Pages 180-200. 1995.	John-David-A		39.625	-118.25	0.1	23.8	24.6	25.4	WDXRF	IGNEOUS	VOLCANIC	FELSIC	TUFF		67.8	0.38	16.3		2.35					0.03	0.25	1.96		4	4.66	0.16				0.37
89-DJ-2		NAVDAT		Tilted middle Tertiary ash-flow calderas and subjacent granitic plutons, southern Stillwater Range, Nevada; cross sections of an Oligocene igneous center.	Geological Society of America Bulletin. 107; 2, Pages 180-200. 1995.	John-David-A		39.625	-118.25	0.1	23.8	24.6	25.4	WET	IGNEOUS	VOLCANIC	FELSIC	TUFF								0														0.69
92-DJ-88		NAVDAT		Tilted middle Tertiary ash-flow calderas and subjacent granitic plutons, southern Stillwater Range, Nevada; cross sections of an Oligocene igneous center.	Geological Society of America Bulletin. 107; 2, Pages 180-200. 1995.	John-David-A		39.625	-118.25	0.1	23.3	26.3	29.3	EDXRF	IGNEOUS	VOLCANIC	FELSIC	TUFF																												< 10		< 10
92-DJ-88		NAVDAT		Tilted middle Tertiary ash-flow calderas and subjacent granitic plutons, southern Stillwater Range, Nevada; cross sections of an Oligocene igneous center.	Geological Society of America Bulletin. 107; 2, Pages 180-200. 1995.	John-David-A		39.625	-118.25	0.1	23.3	26.3	29.3	WDXRF	IGNEOUS	VOLCANIC	FELSIC	TUFF		72.3	0.22	13.6		1.45					0.04	0.76	0.43		2.93	4.59	0.06				0.96
92-DJ-88		NAVDAT		Tilted middle Tertiary ash-flow calderas and subjacent granitic plutons, southern Stillwater Range, Nevada; cross sections of an Oligocene igneous center.	Geological Society of America Bulletin. 107; 2, Pages 180-200. 1995.	John-David-A		39.625	-118.25	0.1	23.3	26.3	29.3	WET	IGNEOUS	VOLCANIC	FELSIC	TUFF								0.44														1.64
87-DJ-223		NAVDAT		Tilted middle Tertiary ash-flow calderas and subjacent granitic plutons, southern Stillwater Range, Nevada; cross sections of an Oligocene igneous center.	Geological Society of America Bulletin. 107; 2, Pages 180-200. 1995.	John-David-A		39.625	-118.25	0.1	23.8	24.5	25.2	EDXRF	IGNEOUS	VOLCANIC	FELSIC	TUFF																												< 10		< 10
87-DJ-223		NAVDAT		Tilted middle Tertiary ash-flow calderas and subjacent granitic plutons, southern Stillwater Range, Nevada; cross sections of an Oligocene igneous center.	Geological Society of America Bulletin. 107; 2, Pages 180-200. 1995.	John-David-A		39.625	-118.25	0.1	23.8	24.5	25.2	WDXRF	IGNEOUS	VOLCANIC	FELSIC	TUFF		71.1	0.32	13.9		1.92					0.04	0.74	0.5		2.79	4.68	0.11				1.51
87-DJ-223		NAVDAT		Tilted middle Tertiary ash-flow calderas and subjacent granitic plutons, southern Stillwater Range, Nevada; cross sections of an Oligocene igneous center.	Geological Society of America Bulletin. 107; 2, Pages 180-200. 1995.	John-David-A		39.625	-118.25	0.1	23.8	24.5	25.2	WET	IGNEOUS	VOLCANIC	FELSIC	TUFF								0.41														1.51
86-DJ-91		NAVDAT		Tilted middle Tertiary ash-flow calderas and subjacent granitic plutons, southern Stillwater Range, Nevada; cross sections of an Oligocene igneous center.	Geological Society of America Bulletin. 107; 2, Pages 180-200. 1995.	John-David-A		39.625	-118.25	0.1	22.5	25	27.5	EDXRF	IGNEOUS	VOLCANIC	FELSIC	TUFF																												< 20		< 20
86-DJ-91		NAVDAT		Tilted middle Tertiary ash-flow calderas and subjacent granitic plutons, southern Stillwater Range, Nevada; cross sections of an Oligocene igneous center.	Geological Society of America Bulletin. 107; 2, Pages 180-200. 1995.	John-David-A		39.625	-118.25	0.1	22.5	25	27.5	WDXRF	IGNEOUS	VOLCANIC	FELSIC	TUFF		65.8	0.46	17		2.97					0.03	0.35	1.9		4.2	4.58	0.18				0.26
86-DJ-91		NAVDAT		Tilted middle Tertiary ash-flow calderas and subjacent granitic plutons, southern Stillwater Range, Nevada; cross sections of an Oligocene igneous center.	Geological Society of America Bulletin. 107; 2, Pages 180-200. 1995.	John-David-A		39.625	-118.25	0.1	22.5	25	27.5	WET	IGNEOUS	VOLCANIC	FELSIC	TUFF								0														1.2
87-DJ-202		NAVDAT		Tilted middle Tertiary ash-flow calderas and subjacent granitic plutons, southern Stillwater Range, Nevada; cross sections of an Oligocene igneous center.	Geological Society of America Bulletin. 107; 2, Pages 180-200. 1995.	John-David-A		39.625	-118.25	0.1	23.7	24.5	25.3	EDXRF	IGNEOUS	VOLCANIC	FELSIC	TUFF																												< 20		< 20
87-DJ-202		NAVDAT		Tilted middle Tertiary ash-flow calderas and subjacent granitic plutons, southern Stillwater Range, Nevada; cross sections of an Oligocene igneous center.	Geological Society of America Bulletin. 107; 2, Pages 180-200. 1995.	John-David-A		39.625	-118.25	0.1	23.7	24.5	25.3	WDXRF	IGNEOUS	VOLCANIC	FELSIC	TUFF		73.5	0.2	13.1		2.01					0.04	< 0.1	0.4		3.3	5	0.04				0.68
87-DJ-202		NAVDAT		Tilted middle Tertiary ash-flow calderas and subjacent granitic plutons, southern Stillwater Range, Nevada; cross sections of an Oligocene igneous center.	Geological Society of America Bulletin. 107; 2, Pages 180-200. 1995.	John-David-A		39.625	-118.25	0.1	23.7	24.5	25.3	WET	IGNEOUS	VOLCANIC	FELSIC	TUFF								0														0.54
92-DJ-37		NAVDAT		Tilted middle Tertiary ash-flow calderas and subjacent granitic plutons, southern Stillwater Range, Nevada; cross sections of an Oligocene igneous center.	Geological Society of America Bulletin. 107; 2, Pages 180-200. 1995.	John-David-A		39.625	-118.25	0.1	23.3	26.3	29.3	EDXRF	IGNEOUS	VOLCANIC	FELSIC	TUFF																												< 10		< 10
92-DJ-37		NAVDAT		Tilted middle Tertiary ash-flow calderas and subjacent granitic plutons, southern Stillwater Range, Nevada; cross sections of an Oligocene igneous center.	Geological Society of America Bulletin. 107; 2, Pages 180-200. 1995.	John-David-A		39.625	-118.25	0.1	23.3	26.3	29.3	WDXRF	IGNEOUS	VOLCANIC	FELSIC	TUFF		75.9	0.15	12.5		1.22					0.03	< 0.1	0.17		3.38	3.66	0.06				0.43
92-DJ-37		NAVDAT		Tilted middle Tertiary ash-flow calderas and subjacent granitic plutons, southern Stillwater Range, Nevada; cross sections of an Oligocene igneous center.	Geological Society of America Bulletin. 107; 2, Pages 180-200. 1995.	John-David-A		39.625	-118.25	0.1	23.3	26.3	29.3	WET	IGNEOUS	VOLCANIC	FELSIC	TUFF								0.54														1.13
91-DJ-41		NAVDAT		Tilted middle Tertiary ash-flow calderas and subjacent granitic plutons, southern Stillwater Range, Nevada; cross sections of an Oligocene igneous center.	Geological Society of America Bulletin. 107; 2, Pages 180-200. 1995.	John-David-A		39.625	-118.25	0.1	23.3	26.3	29.3	EDXRF	IGNEOUS	VOLCANIC	FELSIC	TUFF																												< 10		10
91-DJ-41		NAVDAT		Tilted middle Tertiary ash-flow calderas and subjacent granitic plutons, southern Stillwater Range, Nevada; cross sections of an Oligocene igneous center.	Geological Society of America Bulletin. 107; 2, Pages 180-200. 1995.	John-David-A		39.625	-118.25	0.1	23.3	26.3	29.3	WDXRF	IGNEOUS	VOLCANIC	FELSIC	TUFF		76.3	0.11	12.1		1.55					0.03	0.12	0.35		3.55	4.68	< 0.05				0.1
91-DJ-41		NAVDAT		Tilted middle Tertiary ash-flow calderas and subjacent granitic plutons, southern Stillwater Range, Nevada; cross sections of an Oligocene igneous center.	Geological Society of America Bulletin. 107; 2, Pages 180-200. 1995.	John-David-A		39.625	-118.25	0.1	23.3	26.3	29.3	WET	IGNEOUS	VOLCANIC	FELSIC	TUFF								0														0.41
91-DJ-9		NAVDAT		Tilted middle Tertiary ash-flow calderas and subjacent granitic plutons, southern Stillwater Range, Nevada; cross sections of an Oligocene igneous center.	Geological Society of America Bulletin. 107; 2, Pages 180-200. 1995.	John-David-A		39.625	-118.25	0.1	26.1	29	31.9	EDXRF	IGNEOUS	VOLCANIC	FELSIC	TUFF																												< 10		< 10
91-DJ-9		NAVDAT		Tilted middle Tertiary ash-flow calderas and subjacent granitic plutons, southern Stillwater Range, Nevada; cross sections of an Oligocene igneous center.	Geological Society of America Bulletin. 107; 2, Pages 180-200. 1995.	John-David-A		39.625	-118.25	0.1	26.1	29	31.9	WDXRF	IGNEOUS	VOLCANIC	FELSIC	TUFF		72.1	0.19	14.5		1.54					0.09	0.38	0.33		3.39	4.94	< 0.05				0.81
91-DJ-9		NAVDAT		Tilted middle Tertiary ash-flow calderas and subjacent granitic plutons, southern Stillwater Range, Nevada; cross sections of an Oligocene igneous center.	Geological Society of America Bulletin. 107; 2, Pages 180-200. 1995.	John-David-A		39.625	-118.25	0.1	26.1	29	31.9	WET	IGNEOUS	VOLCANIC	FELSIC	TUFF								0														1.11
TP56a		NAVDAT		The Twin Peaks Caldera, Challis, Idaho; a unique window into theemplacement and evolution of a caldera-filling ignimbrite	Thesis or dissertation; Master's; Monographic	Jellinek, Andrew Mark		44.521	-114.436	0.1	46.1	47.2	48.9	EPMA	IGNEOUS	VOLCANIC	FELSIC	TUFF		77.31	0.05	11.95				1.298			0.02	0	0.25		3.85	2.94
CH 19		NAVDAT		The Twin Peaks Caldera, Challis, Idaho; a unique window into theemplacement and evolution of a caldera-filling ignimbrite	Thesis or dissertation; Master's; Monographic	Jellinek, Andrew Mark		44.521	-114.436	0.1	45.2	45.5	45.8	EPMA	IGNEOUS	VOLCANIC	FELSIC	TUFF		77.56	0.05	9.75				1.341			0.01	0.07	0.09		2.89	4.5
CH 22		NAVDAT		The Twin Peaks Caldera, Challis, Idaho; a unique window into theemplacement and evolution of a caldera-filling ignimbrite	Thesis or dissertation; Master's; Monographic	Jellinek, Andrew Mark		44.521	-114.436	0.1	45.2	45.5	45.8	EPMA	IGNEOUS	VOLCANIC	FELSIC	TUFF		76.2	0.01	10.9				2.207			0	0.15	0.25		1.65	7.01
TP105		NAVDAT		The Twin Peaks Caldera, Challis, Idaho; a unique window into theemplacement and evolution of a caldera-filling ignimbrite	Thesis or dissertation; Master's; Monographic	Jellinek, Andrew Mark		44.521	-114.436	0.1	46.1	47.2	48.9	XRF	IGNEOUS	VOLCANIC	FELSIC	TUFF		81.11	0.133	10.37					2.42		0.101	0	0.3		3.1	4.42	0.011
TP56b		NAVDAT		The Twin Peaks Caldera, Challis, Idaho; a unique window into theemplacement and evolution of a caldera-filling ignimbrite	Thesis or dissertation; Master's; Monographic	Jellinek, Andrew Mark		44.521	-114.436	0.1	46.1	47.2	48.9	XRF	IGNEOUS	VOLCANIC	FELSIC	TUFF		77.32	0.153	12.57					2.68		0.064	0	0.75		3.55	5.23	0.015
TP39		NAVDAT		The Twin Peaks Caldera, Challis, Idaho; a unique window into theemplacement and evolution of a caldera-filling ignimbrite	Thesis or dissertation; Master's; Monographic	Jellinek, Andrew Mark		44.521	-114.436	0.1	45.7	45.9	46.1	XRF	IGNEOUS	VOLCANIC	FELSIC	TUFF		80.4	0.161	12.56					2.3		0.041	0	0.58		3.75	4.91	0.018
TP38		NAVDAT		The Twin Peaks Caldera, Challis, Idaho; a unique window into theemplacement and evolution of a caldera-filling ignimbrite	Thesis or dissertation; Master's; Monographic	Jellinek, Andrew Mark		44.521	-114.436	0.1	45.7	45.9	46.1	XRF	IGNEOUS	VOLCANIC	FELSIC	TUFF		79.75	0.158	12.36					2.65		0.04	0	0.48		3.44	4.96	0.013
TP13a		NAVDAT		The Twin Peaks Caldera, Challis, Idaho; a unique window into theemplacement and evolution of a caldera-filling ignimbrite	Thesis or dissertation; Master's; Monographic	Jellinek, Andrew Mark		44.521	-114.436	0.1	45.2	45.5	45.8	XRF	IGNEOUS	VOLCANIC	FELSIC	TUFF		82.17	0.141	12.23					2.38		0.047	0	0.52		3.17	4.81	0.011
TP18-1		NAVDAT		The Twin Peaks Caldera, Challis, Idaho; a unique window into theemplacement and evolution of a caldera-filling ignimbrite	Thesis or dissertation; Master's; Monographic	Jellinek, Andrew Mark		44.521	-114.436	0.1	45.2	45.5	45.8	XRF	IGNEOUS	VOLCANIC	FELSIC	TUFF		80.08	0.141	12.22					2.93		0.05	0	0.51		2.62	4.99	0.013
87-452K		NAVDAT		Preliminary geochemistry of Miocene ash-flow tuffs in and near the Caliente Caldera complex, southeastern Nevada and southwestern Utah.	U. S. Geological Survey Bulletin. Pages 91-110. 1995.	Nealey-L-David; Rowley-Peter-D; Unruh-Daniel-M; Budahn-James-R; Snee-Lawrence-W; Mehnert-Harald-H; Anderson-R-Ernest		37.8586	-114.325	0.0001	22	22.25	22.5	AAS	IGNEOUS	VOLCANIC	FELSIC	TUFF
87-452K		NAVDAT		Preliminary geochemistry of Miocene ash-flow tuffs in and near the Caliente Caldera complex, southeastern Nevada and southwestern Utah.	U. S. Geological Survey Bulletin. Pages 91-110. 1995.	Nealey-L-David; Rowley-Peter-D; Unruh-Daniel-M; Budahn-James-R; Snee-Lawrence-W; Mehnert-Harald-H; Anderson-R-Ernest		37.8586	-114.325	0.0001	22	22.25	22.5	XRF	IGNEOUS	VOLCANIC	FELSIC	TUFF		60.9	0.73	15.6		5.67					0.08	2.93	5.12		3.16	3.46	0.28		1.5
87-697Y		NAVDAT		Preliminary geochemistry of Miocene ash-flow tuffs in and near the Caliente Caldera complex, southeastern Nevada and southwestern Utah.	U. S. Geological Survey Bulletin. Pages 91-110. 1995.	Nealey-L-David; Rowley-Peter-D; Unruh-Daniel-M; Budahn-James-R; Snee-Lawrence-W; Mehnert-Harald-H; Anderson-R-Ernest		37.5011	-113.861	0.0001	11.4	12	12.6	AAS	IGNEOUS	VOLCANIC	FELSIC	TUFF
87-697Y		NAVDAT		Preliminary geochemistry of Miocene ash-flow tuffs in and near the Caliente Caldera complex, southeastern Nevada and southwestern Utah.	U. S. Geological Survey Bulletin. Pages 91-110. 1995.	Nealey-L-David; Rowley-Peter-D; Unruh-Daniel-M; Budahn-James-R; Snee-Lawrence-W; Mehnert-Harald-H; Anderson-R-Ernest		37.5011	-113.861	0.0001	11.4	12	12.6	XRF	IGNEOUS	VOLCANIC	FELSIC	TUFF		75.6	0.18	11.7		1.7					0.03	0.26	0.72		3.19	4.58	0.05		1.35
BCT-1-33		NAVDAT		A geochemical and strontium isotopic investigation of Laramide and younger igneous rocks in central Colorado, with emphasis on the petrogenesis of the Thirtynine Mile volcanic field	Thesis or dissertation; Doctoral; Monographic	Campbell, Steven Kent		38.9801	-106.105	1e-05	29	34	39	XRF	IGNEOUS	VOLCANIC	FELSIC	TUFF			0.87										4.77				0.28
BCT-1-33		NAVDAT		A geochemical and strontium isotopic investigation of Laramide and younger igneous rocks in central Colorado, with emphasis on the petrogenesis of the Thirtynine Mile volcanic field	Thesis or dissertation; Doctoral; Monographic	Campbell, Steven Kent		38.9801	-106.105	1e-05	29	34	39	UNKNOWN	IGNEOUS	VOLCANIC	FELSIC	TUFF																												11	26	22
BCT-1-33		NAVDAT		A geochemical and strontium isotopic investigation of Laramide and younger igneous rocks in central Colorado, with emphasis on the petrogenesis of the Thirtynine Mile volcanic field	Thesis or dissertation; Doctoral; Monographic	Campbell, Steven Kent		38.9801	-106.105	1e-05	29	34	39	AAS	IGNEOUS	VOLCANIC	FELSIC	TUFF				16.44		2.38		3.09				2.13			3.26	3.14
BCT-1-33		NAVDAT		A geochemical and strontium isotopic investigation of Laramide and younger igneous rocks in central Colorado, with emphasis on the petrogenesis of the Thirtynine Mile volcanic field	Thesis or dissertation; Doctoral; Monographic	Campbell, Steven Kent		38.9801	-106.105	1e-05	29	34	39	UNKNOWN	IGNEOUS	VOLCANIC	FELSIC	TUFF											0.1
BCT-1-33		NAVDAT		A geochemical and strontium isotopic investigation of Laramide and younger igneous rocks in central Colorado, with emphasis on the petrogenesis of the Thirtynine Mile volcanic field	Thesis or dissertation; Doctoral; Monographic	Campbell, Steven Kent		38.9801	-106.105	1e-05	29	34	39	UV-VIS COLORIMETRY	IGNEOUS	VOLCANIC	FELSIC	TUFF		63.55
BCT-1-33		NAVDAT		A geochemical and strontium isotopic investigation of Laramide and younger igneous rocks in central Colorado, with emphasis on the petrogenesis of the Thirtynine Mile volcanic field	Thesis or dissertation; Doctoral; Monographic	Campbell, Steven Kent		38.9801	-106.105	1e-05	29	34	39	ICP	IGNEOUS	VOLCANIC	FELSIC	TUFF
BCT-1-33		NAVDAT		A geochemical and strontium isotopic investigation of Laramide and younger igneous rocks in central Colorado, with emphasis on the petrogenesis of the Thirtynine Mile volcanic field	Thesis or dissertation; Doctoral; Monographic	Campbell, Steven Kent		38.9801	-106.105	1e-05	29	34	39	LOI	IGNEOUS	VOLCANIC	FELSIC	TUFF																			1.46
BCT-1-33		NAVDAT		A geochemical and strontium isotopic investigation of Laramide and younger igneous rocks in central Colorado, with emphasis on the petrogenesis of the Thirtynine Mile volcanic field	Thesis or dissertation; Doctoral; Monographic	Campbell, Steven Kent		38.9801	-106.105	1e-05	29	34	39	GAMMA-RAY COUNTING	IGNEOUS	VOLCANIC	FELSIC	TUFF
BCT-2-84		NAVDAT		A geochemical and strontium isotopic investigation of Laramide and younger igneous rocks in central Colorado, with emphasis on the petrogenesis of the Thirtynine Mile volcanic field	Thesis or dissertation; Doctoral; Monographic	Campbell, Steven Kent		38.6143	-105.942	1e-05	29	34	39	XRF	IGNEOUS	VOLCANIC	FELSIC	TUFF			0.58										2.99				0.19
BCT-2-84		NAVDAT		A geochemical and strontium isotopic investigation of Laramide and younger igneous rocks in central Colorado, with emphasis on the petrogenesis of the Thirtynine Mile volcanic field	Thesis or dissertation; Doctoral; Monographic	Campbell, Steven Kent		38.6143	-105.942	1e-05	29	34	39	UNKNOWN	IGNEOUS	VOLCANIC	FELSIC	TUFF																												2	14	11
BCT-2-84		NAVDAT		A geochemical and strontium isotopic investigation of Laramide and younger igneous rocks in central Colorado, with emphasis on the petrogenesis of the Thirtynine Mile volcanic field	Thesis or dissertation; Doctoral; Monographic	Campbell, Steven Kent		38.6143	-105.942	1e-05	29	34	39	AAS	IGNEOUS	VOLCANIC	FELSIC	TUFF				16.3		2.12		1.08				1.09			3.22	4.4
BCT-2-84		NAVDAT		A geochemical and strontium isotopic investigation of Laramide and younger igneous rocks in central Colorado, with emphasis on the petrogenesis of the Thirtynine Mile volcanic field	Thesis or dissertation; Doctoral; Monographic	Campbell, Steven Kent		38.6143	-105.942	1e-05	29	34	39	UNKNOWN	IGNEOUS	VOLCANIC	FELSIC	TUFF											0.05
BCT-2-84		NAVDAT		A geochemical and strontium isotopic investigation of Laramide and younger igneous rocks in central Colorado, with emphasis on the petrogenesis of the Thirtynine Mile volcanic field	Thesis or dissertation; Doctoral; Monographic	Campbell, Steven Kent		38.6143	-105.942	1e-05	29	34	39	UV-VIS COLORIMETRY	IGNEOUS	VOLCANIC	FELSIC	TUFF		67.97
BCT-2-84		NAVDAT		A geochemical and strontium isotopic investigation of Laramide and younger igneous rocks in central Colorado, with emphasis on the petrogenesis of the Thirtynine Mile volcanic field	Thesis or dissertation; Doctoral; Monographic	Campbell, Steven Kent		38.6143	-105.942	1e-05	29	34	39	ICP	IGNEOUS	VOLCANIC	FELSIC	TUFF
BCT-2-84		NAVDAT		A geochemical and strontium isotopic investigation of Laramide and younger igneous rocks in central Colorado, with emphasis on the petrogenesis of the Thirtynine Mile volcanic field	Thesis or dissertation; Doctoral; Monographic	Campbell, Steven Kent		38.6143	-105.942	1e-05	29	34	39	LOI	IGNEOUS	VOLCANIC	FELSIC	TUFF																			3.41
BCT-2-84		NAVDAT		A geochemical and strontium isotopic investigation of Laramide and younger igneous rocks in central Colorado, with emphasis on the petrogenesis of the Thirtynine Mile volcanic field	Thesis or dissertation; Doctoral; Monographic	Campbell, Steven Kent		38.6143	-105.942	1e-05	29	34	39	GAMMA-RAY COUNTING	IGNEOUS	VOLCANIC	FELSIC	TUFF
BCT-3-85		NAVDAT		A geochemical and strontium isotopic investigation of Laramide and younger igneous rocks in central Colorado, with emphasis on the petrogenesis of the Thirtynine Mile volcanic field	Thesis or dissertation; Doctoral; Monographic	Campbell, Steven Kent		38.5682	-105.918	1e-05	28.7	33.7	38.7	XRF	IGNEOUS	VOLCANIC	FELSIC	TUFF			0.62										3.54				0.2
BCT-3-85		NAVDAT		A geochemical and strontium isotopic investigation of Laramide and younger igneous rocks in central Colorado, with emphasis on the petrogenesis of the Thirtynine Mile volcanic field	Thesis or dissertation; Doctoral; Monographic	Campbell, Steven Kent		38.5682	-105.918	1e-05	28.7	33.7	38.7	UNKNOWN	IGNEOUS	VOLCANIC	FELSIC	TUFF																												7	12	8
BCT-3-85		NAVDAT		A geochemical and strontium isotopic investigation of Laramide and younger igneous rocks in central Colorado, with emphasis on the petrogenesis of the Thirtynine Mile volcanic field	Thesis or dissertation; Doctoral; Monographic	Campbell, Steven Kent		38.5682	-105.918	1e-05	28.7	33.7	38.7	AAS	IGNEOUS	VOLCANIC	FELSIC	TUFF				15.82		2.13		1.48				1.43			3.75	4.05
BCT-3-85		NAVDAT		A geochemical and strontium isotopic investigation of Laramide and younger igneous rocks in central Colorado, with emphasis on the petrogenesis of the Thirtynine Mile volcanic field	Thesis or dissertation; Doctoral; Monographic	Campbell, Steven Kent		38.5682	-105.918	1e-05	28.7	33.7	38.7	UNKNOWN	IGNEOUS	VOLCANIC	FELSIC	TUFF											0.06
BCT-3-85		NAVDAT		A geochemical and strontium isotopic investigation of Laramide and younger igneous rocks in central Colorado, with emphasis on the petrogenesis of the Thirtynine Mile volcanic field	Thesis or dissertation; Doctoral; Monographic	Campbell, Steven Kent		38.5682	-105.918	1e-05	28.7	33.7	38.7	UV-VIS COLORIMETRY	IGNEOUS	VOLCANIC	FELSIC	TUFF		66.92
BCT-3-85		NAVDAT		A geochemical and strontium isotopic investigation of Laramide and younger igneous rocks in central Colorado, with emphasis on the petrogenesis of the Thirtynine Mile volcanic field	Thesis or dissertation; Doctoral; Monographic	Campbell, Steven Kent		38.5682	-105.918	1e-05	28.7	33.7	38.7	ICP	IGNEOUS	VOLCANIC	FELSIC	TUFF
BCT-3-85		NAVDAT		A geochemical and strontium isotopic investigation of Laramide and younger igneous rocks in central Colorado, with emphasis on the petrogenesis of the Thirtynine Mile volcanic field	Thesis or dissertation; Doctoral; Monographic	Campbell, Steven Kent		38.5682	-105.918	1e-05	28.7	33.7	38.7	LOI	IGNEOUS	VOLCANIC	FELSIC	TUFF																			2.12
BCT-3-85		NAVDAT		A geochemical and strontium isotopic investigation of Laramide and younger igneous rocks in central Colorado, with emphasis on the petrogenesis of the Thirtynine Mile volcanic field	Thesis or dissertation; Doctoral; Monographic	Campbell, Steven Kent		38.5682	-105.918	1e-05	28.7	33.7	38.7	GAMMA-RAY COUNTING	IGNEOUS	VOLCANIC	FELSIC	TUFF
BCT-7-110		NAVDAT		A geochemical and strontium isotopic investigation of Laramide and younger igneous rocks in central Colorado, with emphasis on the petrogenesis of the Thirtynine Mile volcanic field	Thesis or dissertation; Doctoral; Monographic	Campbell, Steven Kent		38.9953	-106.102	1e-05	29	34	39	XRF	IGNEOUS	VOLCANIC	FELSIC	TUFF			0.95										5.04				0.28
BCT-7-110		NAVDAT		A geochemical and strontium isotopic investigation of Laramide and younger igneous rocks in central Colorado, with emphasis on the petrogenesis of the Thirtynine Mile volcanic field	Thesis or dissertation; Doctoral; Monographic	Campbell, Steven Kent		38.9953	-106.102	1e-05	29	34	39	UNKNOWN	IGNEOUS	VOLCANIC	FELSIC	TUFF																												14	28	22
BCT-7-110		NAVDAT		A geochemical and strontium isotopic investigation of Laramide and younger igneous rocks in central Colorado, with emphasis on the petrogenesis of the Thirtynine Mile volcanic field	Thesis or dissertation; Doctoral; Monographic	Campbell, Steven Kent		38.9953	-106.102	1e-05	29	34	39	AAS	IGNEOUS	VOLCANIC	FELSIC	TUFF				16.13		2.46		4.43				2.8			3.14	3.09
BCT-7-110		NAVDAT		A geochemical and strontium isotopic investigation of Laramide and younger igneous rocks in central Colorado, with emphasis on the petrogenesis of the Thirtynine Mile volcanic field	Thesis or dissertation; Doctoral; Monographic	Campbell, Steven Kent		38.9953	-106.102	1e-05	29	34	39	UNKNOWN	IGNEOUS	VOLCANIC	FELSIC	TUFF											0.13
BCT-7-110		NAVDAT		A geochemical and strontium isotopic investigation of Laramide and younger igneous rocks in central Colorado, with emphasis on the petrogenesis of the Thirtynine Mile volcanic field	Thesis or dissertation; Doctoral; Monographic	Campbell, Steven Kent		38.9953	-106.102	1e-05	29	34	39	UV-VIS COLORIMETRY	IGNEOUS	VOLCANIC	FELSIC	TUFF		61.54
BCT-7-110		NAVDAT		A geochemical and strontium isotopic investigation of Laramide and younger igneous rocks in central Colorado, with emphasis on the petrogenesis of the Thirtynine Mile volcanic field	Thesis or dissertation; Doctoral; Monographic	Campbell, Steven Kent		38.9953	-106.102	1e-05	29	34	39	ICP	IGNEOUS	VOLCANIC	FELSIC	TUFF
BCT-7-110		NAVDAT		A geochemical and strontium isotopic investigation of Laramide and younger igneous rocks in central Colorado, with emphasis on the petrogenesis of the Thirtynine Mile volcanic field	Thesis or dissertation; Doctoral; Monographic	Campbell, Steven Kent		38.9953	-106.102	1e-05	29	34	39	LOI	IGNEOUS	VOLCANIC	FELSIC	TUFF																			1.34
BCT-7-110		NAVDAT		A geochemical and strontium isotopic investigation of Laramide and younger igneous rocks in central Colorado, with emphasis on the petrogenesis of the Thirtynine Mile volcanic field	Thesis or dissertation; Doctoral; Monographic	Campbell, Steven Kent		38.9953	-106.102	1e-05	29	34	39	GAMMA-RAY COUNTING	IGNEOUS	VOLCANIC	FELSIC	TUFF
BCT-8-111		NAVDAT		A geochemical and strontium isotopic investigation of Laramide and younger igneous rocks in central Colorado, with emphasis on the petrogenesis of the Thirtynine Mile volcanic field	Thesis or dissertation; Doctoral; Monographic	Campbell, Steven Kent		38.9963	-106.102	1e-05	29	34	39	XRF	IGNEOUS	VOLCANIC	FELSIC	TUFF			0.79										5.1				0.24
BCT-8-111		NAVDAT		A geochemical and strontium isotopic investigation of Laramide and younger igneous rocks in central Colorado, with emphasis on the petrogenesis of the Thirtynine Mile volcanic field	Thesis or dissertation; Doctoral; Monographic	Campbell, Steven Kent		38.9963	-106.102	1e-05	29	34	39	UNKNOWN	IGNEOUS	VOLCANIC	FELSIC	TUFF																												9	19	15
BCT-8-111		NAVDAT		A geochemical and strontium isotopic investigation of Laramide and younger igneous rocks in central Colorado, with emphasis on the petrogenesis of the Thirtynine Mile volcanic field	Thesis or dissertation; Doctoral; Monographic	Campbell, Steven Kent		38.9963	-106.102	1e-05	29	34	39	AAS	IGNEOUS	VOLCANIC	FELSIC	TUFF				16.97		2.32		2.91				2.19			2.9	3.34
BCT-8-111		NAVDAT		A geochemical and strontium isotopic investigation of Laramide and younger igneous rocks in central Colorado, with emphasis on the petrogenesis of the Thirtynine Mile volcanic field	Thesis or dissertation; Doctoral; Monographic	Campbell, Steven Kent		38.9963	-106.102	1e-05	29	34	39	UNKNOWN	IGNEOUS	VOLCANIC	FELSIC	TUFF											0.1
BCT-8-111		NAVDAT		A geochemical and strontium isotopic investigation of Laramide and younger igneous rocks in central Colorado, with emphasis on the petrogenesis of the Thirtynine Mile volcanic field	Thesis or dissertation; Doctoral; Monographic	Campbell, Steven Kent		38.9963	-106.102	1e-05	29	34	39	UV-VIS COLORIMETRY	IGNEOUS	VOLCANIC	FELSIC	TUFF		63.13
BCT-8-111		NAVDAT		A geochemical and strontium isotopic investigation of Laramide and younger igneous rocks in central Colorado, with emphasis on the petrogenesis of the Thirtynine Mile volcanic field	Thesis or dissertation; Doctoral; Monographic	Campbell, Steven Kent		38.9963	-106.102	1e-05	29	34	39	ICP	IGNEOUS	VOLCANIC	FELSIC	TUFF
BCT-8-111		NAVDAT		A geochemical and strontium isotopic investigation of Laramide and younger igneous rocks in central Colorado, with emphasis on the petrogenesis of the Thirtynine Mile volcanic field	Thesis or dissertation; Doctoral; Monographic	Campbell, Steven Kent		38.9963	-106.102	1e-05	29	34	39	LOI	IGNEOUS	VOLCANIC	FELSIC	TUFF																			3.19
BCT-8-111		NAVDAT		A geochemical and strontium isotopic investigation of Laramide and younger igneous rocks in central Colorado, with emphasis on the petrogenesis of the Thirtynine Mile volcanic field	Thesis or dissertation; Doctoral; Monographic	Campbell, Steven Kent		38.9963	-106.102	1e-05	29	34	39	GAMMA-RAY COUNTING	IGNEOUS	VOLCANIC	FELSIC	TUFF
BCT-9-120		NAVDAT		A geochemical and strontium isotopic investigation of Laramide and younger igneous rocks in central Colorado, with emphasis on the petrogenesis of the Thirtynine Mile volcanic field	Thesis or dissertation; Doctoral; Monographic	Campbell, Steven Kent		38.7757	-105.969	1e-05	29	34	39	XRF	IGNEOUS	VOLCANIC	FELSIC	TUFF			0.72										3.84				0.21
BCT-9-120		NAVDAT		A geochemical and strontium isotopic investigation of Laramide and younger igneous rocks in central Colorado, with emphasis on the petrogenesis of the Thirtynine Mile volcanic field	Thesis or dissertation; Doctoral; Monographic	Campbell, Steven Kent		38.7757	-105.969	1e-05	29	34	39	UNKNOWN	IGNEOUS	VOLCANIC	FELSIC	TUFF																												7	12	10
BCT-9-120		NAVDAT		A geochemical and strontium isotopic investigation of Laramide and younger igneous rocks in central Colorado, with emphasis on the petrogenesis of the Thirtynine Mile volcanic field	Thesis or dissertation; Doctoral; Monographic	Campbell, Steven Kent		38.7757	-105.969	1e-05	29	34	39	AAS	IGNEOUS	VOLCANIC	FELSIC	TUFF				15.63		2.23		1.61				2.12			3.48	3.46
BCT-9-120		NAVDAT		A geochemical and strontium isotopic investigation of Laramide and younger igneous rocks in central Colorado, with emphasis on the petrogenesis of the Thirtynine Mile volcanic field	Thesis or dissertation; Doctoral; Monographic	Campbell, Steven Kent		38.7757	-105.969	1e-05	29	34	39	UNKNOWN	IGNEOUS	VOLCANIC	FELSIC	TUFF											0.05
BCT-9-120		NAVDAT		A geochemical and strontium isotopic investigation of Laramide and younger igneous rocks in central Colorado, with emphasis on the petrogenesis of the Thirtynine Mile volcanic field	Thesis or dissertation; Doctoral; Monographic	Campbell, Steven Kent		38.7757	-105.969	1e-05	29	34	39	UV-VIS COLORIMETRY	IGNEOUS	VOLCANIC	FELSIC	TUFF		66.64
BCT-9-120		NAVDAT		A geochemical and strontium isotopic investigation of Laramide and younger igneous rocks in central Colorado, with emphasis on the petrogenesis of the Thirtynine Mile volcanic field	Thesis or dissertation; Doctoral; Monographic	Campbell, Steven Kent		38.7757	-105.969	1e-05	29	34	39	ICP	IGNEOUS	VOLCANIC	FELSIC	TUFF
BCT-9-120		NAVDAT		A geochemical and strontium isotopic investigation of Laramide and younger igneous rocks in central Colorado, with emphasis on the petrogenesis of the Thirtynine Mile volcanic field	Thesis or dissertation; Doctoral; Monographic	Campbell, Steven Kent		38.7757	-105.969	1e-05	29	34	39	LOI	IGNEOUS	VOLCANIC	FELSIC	TUFF																			1.58
BCT-9-120		NAVDAT		A geochemical and strontium isotopic investigation of Laramide and younger igneous rocks in central Colorado, with emphasis on the petrogenesis of the Thirtynine Mile volcanic field	Thesis or dissertation; Doctoral; Monographic	Campbell, Steven Kent		38.7757	-105.969	1e-05	29	34	39	GAMMA-RAY COUNTING	IGNEOUS	VOLCANIC	FELSIC	TUFF
BCTI-1-142		NAVDAT		A geochemical and strontium isotopic investigation of Laramide and younger igneous rocks in central Colorado, with emphasis on the petrogenesis of the Thirtynine Mile volcanic field	Thesis or dissertation; Doctoral; Monographic	Campbell, Steven Kent		38.6041	-106.345	1e-05	30.7	35.7	40.7	XRF	IGNEOUS	VOLCANIC	FELSIC	TUFF			0.59										3.02				0.22
BCTI-1-142		NAVDAT		A geochemical and strontium isotopic investigation of Laramide and younger igneous rocks in central Colorado, with emphasis on the petrogenesis of the Thirtynine Mile volcanic field	Thesis or dissertation; Doctoral; Monographic	Campbell, Steven Kent		38.6041	-106.345	1e-05	30.7	35.7	40.7	UNKNOWN	IGNEOUS	VOLCANIC	FELSIC	TUFF																												9	15	12
BCTI-1-142		NAVDAT		A geochemical and strontium isotopic investigation of Laramide and younger igneous rocks in central Colorado, with emphasis on the petrogenesis of the Thirtynine Mile volcanic field	Thesis or dissertation; Doctoral; Monographic	Campbell, Steven Kent		38.6041	-106.345	1e-05	30.7	35.7	40.7	AAS	IGNEOUS	VOLCANIC	FELSIC	TUFF				15.97		2.11		1.81				1.32			4	4.41
BCTI-1-142		NAVDAT		A geochemical and strontium isotopic investigation of Laramide and younger igneous rocks in central Colorado, with emphasis on the petrogenesis of the Thirtynine Mile volcanic field	Thesis or dissertation; Doctoral; Monographic	Campbell, Steven Kent		38.6041	-106.345	1e-05	30.7	35.7	40.7	UNKNOWN	IGNEOUS	VOLCANIC	FELSIC	TUFF											0.1
BCTI-1-142		NAVDAT		A geochemical and strontium isotopic investigation of Laramide and younger igneous rocks in central Colorado, with emphasis on the petrogenesis of the Thirtynine Mile volcanic field	Thesis or dissertation; Doctoral; Monographic	Campbell, Steven Kent		38.6041	-106.345	1e-05	30.7	35.7	40.7	UV-VIS COLORIMETRY	IGNEOUS	VOLCANIC	FELSIC	TUFF		66.47
BCTI-1-142		NAVDAT		A geochemical and strontium isotopic investigation of Laramide and younger igneous rocks in central Colorado, with emphasis on the petrogenesis of the Thirtynine Mile volcanic field	Thesis or dissertation; Doctoral; Monographic	Campbell, Steven Kent		38.6041	-106.345	1e-05	30.7	35.7	40.7	ICP	IGNEOUS	VOLCANIC	FELSIC	TUFF
BCTI-1-142		NAVDAT		A geochemical and strontium isotopic investigation of Laramide and younger igneous rocks in central Colorado, with emphasis on the petrogenesis of the Thirtynine Mile volcanic field	Thesis or dissertation; Doctoral; Monographic	Campbell, Steven Kent		38.6041	-106.345	1e-05	30.7	35.7	40.7	LOI	IGNEOUS	VOLCANIC	FELSIC	TUFF																			0.88
BCTI-1-142		NAVDAT		A geochemical and strontium isotopic investigation of Laramide and younger igneous rocks in central Colorado, with emphasis on the petrogenesis of the Thirtynine Mile volcanic field	Thesis or dissertation; Doctoral; Monographic	Campbell, Steven Kent		38.6041	-106.345	1e-05	30.7	35.7	40.7	GAMMA-RAY COUNTING	IGNEOUS	VOLCANIC	FELSIC	TUFF
BCTI-2-144		NAVDAT		A geochemical and strontium isotopic investigation of Laramide and younger igneous rocks in central Colorado, with emphasis on the petrogenesis of the Thirtynine Mile volcanic field	Thesis or dissertation; Doctoral; Monographic	Campbell, Steven Kent		38.5861	-106.338	1e-05	31	36	21	XRF	IGNEOUS	VOLCANIC	FELSIC	TUFF			0.55										3.15				0.21
BCTI-2-144		NAVDAT		A geochemical and strontium isotopic investigation of Laramide and younger igneous rocks in central Colorado, with emphasis on the petrogenesis of the Thirtynine Mile volcanic field	Thesis or dissertation; Doctoral; Monographic	Campbell, Steven Kent		38.5861	-106.338	1e-05	31	36	21	UNKNOWN	IGNEOUS	VOLCANIC	FELSIC	TUFF																												8	16	10
BCTI-2-144		NAVDAT		A geochemical and strontium isotopic investigation of Laramide and younger igneous rocks in central Colorado, with emphasis on the petrogenesis of the Thirtynine Mile volcanic field	Thesis or dissertation; Doctoral; Monographic	Campbell, Steven Kent		38.5861	-106.338	1e-05	31	36	21	AAS	IGNEOUS	VOLCANIC	FELSIC	TUFF				16.17		2.05		1.93				1.26			4.14	4.18
BCTI-2-144		NAVDAT		A geochemical and strontium isotopic investigation of Laramide and younger igneous rocks in central Colorado, with emphasis on the petrogenesis of the Thirtynine Mile volcanic field	Thesis or dissertation; Doctoral; Monographic	Campbell, Steven Kent		38.5861	-106.338	1e-05	31	36	21	UNKNOWN	IGNEOUS	VOLCANIC	FELSIC	TUFF											0.08
BCTI-2-144		NAVDAT		A geochemical and strontium isotopic investigation of Laramide and younger igneous rocks in central Colorado, with emphasis on the petrogenesis of the Thirtynine Mile volcanic field	Thesis or dissertation; Doctoral; Monographic	Campbell, Steven Kent		38.5861	-106.338	1e-05	31	36	21	UV-VIS COLORIMETRY	IGNEOUS	VOLCANIC	FELSIC	TUFF		66.28
BCTI-2-144		NAVDAT		A geochemical and strontium isotopic investigation of Laramide and younger igneous rocks in central Colorado, with emphasis on the petrogenesis of the Thirtynine Mile volcanic field	Thesis or dissertation; Doctoral; Monographic	Campbell, Steven Kent		38.5861	-106.338	1e-05	31	36	21	ICP	IGNEOUS	VOLCANIC	FELSIC	TUFF
BCTI-2-144		NAVDAT		A geochemical and strontium isotopic investigation of Laramide and younger igneous rocks in central Colorado, with emphasis on the petrogenesis of the Thirtynine Mile volcanic field	Thesis or dissertation; Doctoral; Monographic	Campbell, Steven Kent		38.5861	-106.338	1e-05	31	36	21	LOI	IGNEOUS	VOLCANIC	FELSIC	TUFF																			0.59
BCTI-2-144		NAVDAT		A geochemical and strontium isotopic investigation of Laramide and younger igneous rocks in central Colorado, with emphasis on the petrogenesis of the Thirtynine Mile volcanic field	Thesis or dissertation; Doctoral; Monographic	Campbell, Steven Kent		38.5861	-106.338	1e-05	31	36	21	GAMMA-RAY COUNTING	IGNEOUS	VOLCANIC	FELSIC	TUFF
EGT-1-104		NAVDAT		A geochemical and strontium isotopic investigation of Laramide and younger igneous rocks in central Colorado, with emphasis on the petrogenesis of the Thirtynine Mile volcanic field	Thesis or dissertation; Doctoral; Monographic	Campbell, Steven Kent		38.4459	-105.824	1e-05	28.5	33.5	38.5	XRF	IGNEOUS	VOLCANIC	FELSIC	TUFF			0.23										1.51				0.05
EGT-1-104		NAVDAT		A geochemical and strontium isotopic investigation of Laramide and younger igneous rocks in central Colorado, with emphasis on the petrogenesis of the Thirtynine Mile volcanic field	Thesis or dissertation; Doctoral; Monographic	Campbell, Steven Kent		38.4459	-105.824	1e-05	28.5	33.5	38.5	UNKNOWN	IGNEOUS	VOLCANIC	FELSIC	TUFF																												2	9	3
EGT-1-104		NAVDAT		A geochemical and strontium isotopic investigation of Laramide and younger igneous rocks in central Colorado, with emphasis on the petrogenesis of the Thirtynine Mile volcanic field	Thesis or dissertation; Doctoral; Monographic	Campbell, Steven Kent		38.4459	-105.824	1e-05	28.5	33.5	38.5	AAS	IGNEOUS	VOLCANIC	FELSIC	TUFF				14.2		1.54		0				1.16			2.95	5.17
EGT-1-104		NAVDAT		A geochemical and strontium isotopic investigation of Laramide and younger igneous rocks in central Colorado, with emphasis on the petrogenesis of the Thirtynine Mile volcanic field	Thesis or dissertation; Doctoral; Monographic	Campbell, Steven Kent		38.4459	-105.824	1e-05	28.5	33.5	38.5	UNKNOWN	IGNEOUS	VOLCANIC	FELSIC	TUFF											0.14
EGT-1-104		NAVDAT		A geochemical and strontium isotopic investigation of Laramide and younger igneous rocks in central Colorado, with emphasis on the petrogenesis of the Thirtynine Mile volcanic field	Thesis or dissertation; Doctoral; Monographic	Campbell, Steven Kent		38.4459	-105.824	1e-05	28.5	33.5	38.5	UV-VIS COLORIMETRY	IGNEOUS	VOLCANIC	FELSIC	TUFF		73.05
EGT-1-104		NAVDAT		A geochemical and strontium isotopic investigation of Laramide and younger igneous rocks in central Colorado, with emphasis on the petrogenesis of the Thirtynine Mile volcanic field	Thesis or dissertation; Doctoral; Monographic	Campbell, Steven Kent		38.4459	-105.824	1e-05	28.5	33.5	38.5	ICP	IGNEOUS	VOLCANIC	FELSIC	TUFF
EGT-1-104		NAVDAT		A geochemical and strontium isotopic investigation of Laramide and younger igneous rocks in central Colorado, with emphasis on the petrogenesis of the Thirtynine Mile volcanic field	Thesis or dissertation; Doctoral; Monographic	Campbell, Steven Kent		38.4459	-105.824	1e-05	28.5	33.5	38.5	LOI	IGNEOUS	VOLCANIC	FELSIC	TUFF																			8.74
EGT-1-104		NAVDAT		A geochemical and strontium isotopic investigation of Laramide and younger igneous rocks in central Colorado, with emphasis on the petrogenesis of the Thirtynine Mile volcanic field	Thesis or dissertation; Doctoral; Monographic	Campbell, Steven Kent		38.4459	-105.824	1e-05	28.5	33.5	38.5	GAMMA-RAY COUNTING	IGNEOUS	VOLCANIC	FELSIC	TUFF
GPT-2-4		NAVDAT		A geochemical and strontium isotopic investigation of Laramide and younger igneous rocks in central Colorado, with emphasis on the petrogenesis of the Thirtynine Mile volcanic field	Thesis or dissertation; Doctoral; Monographic	Campbell, Steven Kent		38.6	-105.78	0.01	28	33	38	XRF	IGNEOUS	VOLCANIC	FELSIC	TUFF			0.27										1.12				0.05
GPT-2-4		NAVDAT		A geochemical and strontium isotopic investigation of Laramide and younger igneous rocks in central Colorado, with emphasis on the petrogenesis of the Thirtynine Mile volcanic field	Thesis or dissertation; Doctoral; Monographic	Campbell, Steven Kent		38.6	-105.78	0.01	28	33	38	UNKNOWN	IGNEOUS	VOLCANIC	FELSIC	TUFF																												3	15	7
GPT-2-4		NAVDAT		A geochemical and strontium isotopic investigation of Laramide and younger igneous rocks in central Colorado, with emphasis on the petrogenesis of the Thirtynine Mile volcanic field	Thesis or dissertation; Doctoral; Monographic	Campbell, Steven Kent		38.6	-105.78	0.01	28	33	38	AAS	IGNEOUS	VOLCANIC	FELSIC	TUFF				11.78		1.52		0				0.18			3.38	4.93
GPT-2-4		NAVDAT		A geochemical and strontium isotopic investigation of Laramide and younger igneous rocks in central Colorado, with emphasis on the petrogenesis of the Thirtynine Mile volcanic field	Thesis or dissertation; Doctoral; Monographic	Campbell, Steven Kent		38.6	-105.78	0.01	28	33	38	UNKNOWN	IGNEOUS	VOLCANIC	FELSIC	TUFF											0.04
GPT-2-4		NAVDAT		A geochemical and strontium isotopic investigation of Laramide and younger igneous rocks in central Colorado, with emphasis on the petrogenesis of the Thirtynine Mile volcanic field	Thesis or dissertation; Doctoral; Monographic	Campbell, Steven Kent		38.6	-105.78	0.01	28	33	38	UV-VIS COLORIMETRY	IGNEOUS	VOLCANIC	FELSIC	TUFF		76.73
GPT-2-4		NAVDAT		A geochemical and strontium isotopic investigation of Laramide and younger igneous rocks in central Colorado, with emphasis on the petrogenesis of the Thirtynine Mile volcanic field	Thesis or dissertation; Doctoral; Monographic	Campbell, Steven Kent		38.6	-105.78	0.01	28	33	38	ICP	IGNEOUS	VOLCANIC	FELSIC	TUFF
GPT-2-4		NAVDAT		A geochemical and strontium isotopic investigation of Laramide and younger igneous rocks in central Colorado, with emphasis on the petrogenesis of the Thirtynine Mile volcanic field	Thesis or dissertation; Doctoral; Monographic	Campbell, Steven Kent		38.6	-105.78	0.01	28	33	38	LOI	IGNEOUS	VOLCANIC	FELSIC	TUFF																			1.94
GPT-2-4		NAVDAT		A geochemical and strontium isotopic investigation of Laramide and younger igneous rocks in central Colorado, with emphasis on the petrogenesis of the Thirtynine Mile volcanic field	Thesis or dissertation; Doctoral; Monographic	Campbell, Steven Kent		38.6	-105.78	0.01	28	33	38	GAMMA-RAY COUNTING	IGNEOUS	VOLCANIC	FELSIC	TUFF
GPT-3-15		NAVDAT		A geochemical and strontium isotopic investigation of Laramide and younger igneous rocks in central Colorado, with emphasis on the petrogenesis of the Thirtynine Mile volcanic field	Thesis or dissertation; Doctoral; Monographic	Campbell, Steven Kent		38.5673	-105.555	1e-05	28	33	38	XRF	IGNEOUS	VOLCANIC	FELSIC	TUFF			0.18										0.63				0.05
GPT-3-15		NAVDAT		A geochemical and strontium isotopic investigation of Laramide and younger igneous rocks in central Colorado, with emphasis on the petrogenesis of the Thirtynine Mile volcanic field	Thesis or dissertation; Doctoral; Monographic	Campbell, Steven Kent		38.5673	-105.555	1e-05	28	33	38	UNKNOWN	IGNEOUS	VOLCANIC	FELSIC	TUFF																												2	7	3
GPT-3-15		NAVDAT		A geochemical and strontium isotopic investigation of Laramide and younger igneous rocks in central Colorado, with emphasis on the petrogenesis of the Thirtynine Mile volcanic field	Thesis or dissertation; Doctoral; Monographic	Campbell, Steven Kent		38.5673	-105.555	1e-05	28	33	38	AAS	IGNEOUS	VOLCANIC	FELSIC	TUFF				13.28		1.49		0				0.18			4.2	5
GPT-3-15		NAVDAT		A geochemical and strontium isotopic investigation of Laramide and younger igneous rocks in central Colorado, with emphasis on the petrogenesis of the Thirtynine Mile volcanic field	Thesis or dissertation; Doctoral; Monographic	Campbell, Steven Kent		38.5673	-105.555	1e-05	28	33	38	UNKNOWN	IGNEOUS	VOLCANIC	FELSIC	TUFF											0.03
GPT-3-15		NAVDAT		A geochemical and strontium isotopic investigation of Laramide and younger igneous rocks in central Colorado, with emphasis on the petrogenesis of the Thirtynine Mile volcanic field	Thesis or dissertation; Doctoral; Monographic	Campbell, Steven Kent		38.5673	-105.555	1e-05	28	33	38	UV-VIS COLORIMETRY	IGNEOUS	VOLCANIC	FELSIC	TUFF		74.97
GPT-3-15		NAVDAT		A geochemical and strontium isotopic investigation of Laramide and younger igneous rocks in central Colorado, with emphasis on the petrogenesis of the Thirtynine Mile volcanic field	Thesis or dissertation; Doctoral; Monographic	Campbell, Steven Kent		38.5673	-105.555	1e-05	28	33	38	ICP	IGNEOUS	VOLCANIC	FELSIC	TUFF
GPT-3-15		NAVDAT		A geochemical and strontium isotopic investigation of Laramide and younger igneous rocks in central Colorado, with emphasis on the petrogenesis of the Thirtynine Mile volcanic field	Thesis or dissertation; Doctoral; Monographic	Campbell, Steven Kent		38.5673	-105.555	1e-05	28	33	38	LOI	IGNEOUS	VOLCANIC	FELSIC	TUFF																			1.14
GPT-3-15		NAVDAT		A geochemical and strontium isotopic investigation of Laramide and younger igneous rocks in central Colorado, with emphasis on the petrogenesis of the Thirtynine Mile volcanic field	Thesis or dissertation; Doctoral; Monographic	Campbell, Steven Kent		38.5673	-105.555	1e-05	28	33	38	GAMMA-RAY COUNTING	IGNEOUS	VOLCANIC	FELSIC	TUFF
GPT-4-25		NAVDAT		A geochemical and strontium isotopic investigation of Laramide and younger igneous rocks in central Colorado, with emphasis on the petrogenesis of the Thirtynine Mile volcanic field	Thesis or dissertation; Doctoral; Monographic	Campbell, Steven Kent		38.2637	-105.6	1e-05	32.7	33.9	34.5	XRF	IGNEOUS	VOLCANIC	FELSIC	TUFF			0.31										0.92				0.07
GPT-4-25		NAVDAT		A geochemical and strontium isotopic investigation of Laramide and younger igneous rocks in central Colorado, with emphasis on the petrogenesis of the Thirtynine Mile volcanic field	Thesis or dissertation; Doctoral; Monographic	Campbell, Steven Kent		38.2637	-105.6	1e-05	32.7	33.9	34.5	UNKNOWN	IGNEOUS	VOLCANIC	FELSIC	TUFF																												3	7	8
GPT-4-25		NAVDAT		A geochemical and strontium isotopic investigation of Laramide and younger igneous rocks in central Colorado, with emphasis on the petrogenesis of the Thirtynine Mile volcanic field	Thesis or dissertation; Doctoral; Monographic	Campbell, Steven Kent		38.2637	-105.6	1e-05	32.7	33.9	34.5	AAS	IGNEOUS	VOLCANIC	FELSIC	TUFF				14.52		1.84		0.29				0.69			3.56	5.51
GPT-4-25		NAVDAT		A geochemical and strontium isotopic investigation of Laramide and younger igneous rocks in central Colorado, with emphasis on the petrogenesis of the Thirtynine Mile volcanic field	Thesis or dissertation; Doctoral; Monographic	Campbell, Steven Kent		38.2637	-105.6	1e-05	32.7	33.9	34.5	UNKNOWN	IGNEOUS	VOLCANIC	FELSIC	TUFF											0.05
GPT-4-25		NAVDAT		A geochemical and strontium isotopic investigation of Laramide and younger igneous rocks in central Colorado, with emphasis on the petrogenesis of the Thirtynine Mile volcanic field	Thesis or dissertation; Doctoral; Monographic	Campbell, Steven Kent		38.2637	-105.6	1e-05	32.7	33.9	34.5	UV-VIS COLORIMETRY	IGNEOUS	VOLCANIC	FELSIC	TUFF		72.23
GPT-4-25		NAVDAT		A geochemical and strontium isotopic investigation of Laramide and younger igneous rocks in central Colorado, with emphasis on the petrogenesis of the Thirtynine Mile volcanic field	Thesis or dissertation; Doctoral; Monographic	Campbell, Steven Kent		38.2637	-105.6	1e-05	32.7	33.9	34.5	ICP	IGNEOUS	VOLCANIC	FELSIC	TUFF
GPT-4-25		NAVDAT		A geochemical and strontium isotopic investigation of Laramide and younger igneous rocks in central Colorado, with emphasis on the petrogenesis of the Thirtynine Mile volcanic field	Thesis or dissertation; Doctoral; Monographic	Campbell, Steven Kent		38.2637	-105.6	1e-05	32.7	33.9	34.5	LOI	IGNEOUS	VOLCANIC	FELSIC	TUFF																			2.99
GPT-4-25		NAVDAT		A geochemical and strontium isotopic investigation of Laramide and younger igneous rocks in central Colorado, with emphasis on the petrogenesis of the Thirtynine Mile volcanic field	Thesis or dissertation; Doctoral; Monographic	Campbell, Steven Kent		38.2637	-105.6	1e-05	32.7	33.9	34.5	GAMMA-RAY COUNTING	IGNEOUS	VOLCANIC	FELSIC	TUFF
GPT-5-57		NAVDAT		A geochemical and strontium isotopic investigation of Laramide and younger igneous rocks in central Colorado, with emphasis on the petrogenesis of the Thirtynine Mile volcanic field	Thesis or dissertation; Doctoral; Monographic	Campbell, Steven Kent		38.6059	-105.671	1e-05	28	33	38	XRF	IGNEOUS	VOLCANIC	FELSIC	TUFF			0.41										1.62				0.06
GPT-5-57		NAVDAT		A geochemical and strontium isotopic investigation of Laramide and younger igneous rocks in central Colorado, with emphasis on the petrogenesis of the Thirtynine Mile volcanic field	Thesis or dissertation; Doctoral; Monographic	Campbell, Steven Kent		38.6059	-105.671	1e-05	28	33	38	UNKNOWN	IGNEOUS	VOLCANIC	FELSIC	TUFF																												5	10	4
GPT-5-57		NAVDAT		A geochemical and strontium isotopic investigation of Laramide and younger igneous rocks in central Colorado, with emphasis on the petrogenesis of the Thirtynine Mile volcanic field	Thesis or dissertation; Doctoral; Monographic	Campbell, Steven Kent		38.6059	-105.671	1e-05	28	33	38	AAS	IGNEOUS	VOLCANIC	FELSIC	TUFF				13.64		1.91		0.45				0.41			3.81	4.87
GPT-5-57		NAVDAT		A geochemical and strontium isotopic investigation of Laramide and younger igneous rocks in central Colorado, with emphasis on the petrogenesis of the Thirtynine Mile volcanic field	Thesis or dissertation; Doctoral; Monographic	Campbell, Steven Kent		38.6059	-105.671	1e-05	28	33	38	UNKNOWN	IGNEOUS	VOLCANIC	FELSIC	TUFF											0.06
GPT-5-57		NAVDAT		A geochemical and strontium isotopic investigation of Laramide and younger igneous rocks in central Colorado, with emphasis on the petrogenesis of the Thirtynine Mile volcanic field	Thesis or dissertation; Doctoral; Monographic	Campbell, Steven Kent		38.6059	-105.671	1e-05	28	33	38	UV-VIS COLORIMETRY	IGNEOUS	VOLCANIC	FELSIC	TUFF		72.76
GPT-5-57		NAVDAT		A geochemical and strontium isotopic investigation of Laramide and younger igneous rocks in central Colorado, with emphasis on the petrogenesis of the Thirtynine Mile volcanic field	Thesis or dissertation; Doctoral; Monographic	Campbell, Steven Kent		38.6059	-105.671	1e-05	28	33	38	ICP	IGNEOUS	VOLCANIC	FELSIC	TUFF
GPT-5-57		NAVDAT		A geochemical and strontium isotopic investigation of Laramide and younger igneous rocks in central Colorado, with emphasis on the petrogenesis of the Thirtynine Mile volcanic field	Thesis or dissertation; Doctoral; Monographic	Campbell, Steven Kent		38.6059	-105.671	1e-05	28	33	38	LOI	IGNEOUS	VOLCANIC	FELSIC	TUFF																			1.09
GPT-5-57		NAVDAT		A geochemical and strontium isotopic investigation of Laramide and younger igneous rocks in central Colorado, with emphasis on the petrogenesis of the Thirtynine Mile volcanic field	Thesis or dissertation; Doctoral; Monographic	Campbell, Steven Kent		38.6059	-105.671	1e-05	28	33	38	GAMMA-RAY COUNTING	IGNEOUS	VOLCANIC	FELSIC	TUFF
GPT-6-123		NAVDAT		A geochemical and strontium isotopic investigation of Laramide and younger igneous rocks in central Colorado, with emphasis on the petrogenesis of the Thirtynine Mile volcanic field	Thesis or dissertation; Doctoral; Monographic	Campbell, Steven Kent		38.7094	-105.841	1e-05	28	33	38	XRF	IGNEOUS	VOLCANIC	FELSIC	TUFF			0.33										1.52				0.09
GPT-6-123		NAVDAT		A geochemical and strontium isotopic investigation of Laramide and younger igneous rocks in central Colorado, with emphasis on the petrogenesis of the Thirtynine Mile volcanic field	Thesis or dissertation; Doctoral; Monographic	Campbell, Steven Kent		38.7094	-105.841	1e-05	28	33	38	UNKNOWN	IGNEOUS	VOLCANIC	FELSIC	TUFF																												3	16	5
GPT-6-123		NAVDAT		A geochemical and strontium isotopic investigation of Laramide and younger igneous rocks in central Colorado, with emphasis on the petrogenesis of the Thirtynine Mile volcanic field	Thesis or dissertation; Doctoral; Monographic	Campbell, Steven Kent		38.7094	-105.841	1e-05	28	33	38	AAS	IGNEOUS	VOLCANIC	FELSIC	TUFF				11.79		1.86		0.35				0.44			3.24	4.04
GPT-6-123		NAVDAT		A geochemical and strontium isotopic investigation of Laramide and younger igneous rocks in central Colorado, with emphasis on the petrogenesis of the Thirtynine Mile volcanic field	Thesis or dissertation; Doctoral; Monographic	Campbell, Steven Kent		38.7094	-105.841	1e-05	28	33	38	UNKNOWN	IGNEOUS	VOLCANIC	FELSIC	TUFF											0.06
GPT-6-123		NAVDAT		A geochemical and strontium isotopic investigation of Laramide and younger igneous rocks in central Colorado, with emphasis on the petrogenesis of the Thirtynine Mile volcanic field	Thesis or dissertation; Doctoral; Monographic	Campbell, Steven Kent		38.7094	-105.841	1e-05	28	33	38	UV-VIS COLORIMETRY	IGNEOUS	VOLCANIC	FELSIC	TUFF		76.28
GPT-6-123		NAVDAT		A geochemical and strontium isotopic investigation of Laramide and younger igneous rocks in central Colorado, with emphasis on the petrogenesis of the Thirtynine Mile volcanic field	Thesis or dissertation; Doctoral; Monographic	Campbell, Steven Kent		38.7094	-105.841	1e-05	28	33	38	ICP	IGNEOUS	VOLCANIC	FELSIC	TUFF
GPT-6-123		NAVDAT		A geochemical and strontium isotopic investigation of Laramide and younger igneous rocks in central Colorado, with emphasis on the petrogenesis of the Thirtynine Mile volcanic field	Thesis or dissertation; Doctoral; Monographic	Campbell, Steven Kent		38.7094	-105.841	1e-05	28	33	38	LOI	IGNEOUS	VOLCANIC	FELSIC	TUFF																			2.73
GPT-6-123		NAVDAT		A geochemical and strontium isotopic investigation of Laramide and younger igneous rocks in central Colorado, with emphasis on the petrogenesis of the Thirtynine Mile volcanic field	Thesis or dissertation; Doctoral; Monographic	Campbell, Steven Kent		38.7094	-105.841	1e-05	28	33	38	GAMMA-RAY COUNTING	IGNEOUS	VOLCANIC	FELSIC	TUFF
GPT-7-150		NAVDAT		A geochemical and strontium isotopic investigation of Laramide and younger igneous rocks in central Colorado, with emphasis on the petrogenesis of the Thirtynine Mile volcanic field	Thesis or dissertation; Doctoral; Monographic	Campbell, Steven Kent		38.6	-105.6	0.01	31.9	32.8	33.7	XRF	IGNEOUS	VOLCANIC	FELSIC	TUFF			0.37										1.2				0.14
GPT-7-150		NAVDAT		A geochemical and strontium isotopic investigation of Laramide and younger igneous rocks in central Colorado, with emphasis on the petrogenesis of the Thirtynine Mile volcanic field	Thesis or dissertation; Doctoral; Monographic	Campbell, Steven Kent		38.6	-105.6	0.01	31.9	32.8	33.7	UNKNOWN	IGNEOUS	VOLCANIC	FELSIC	TUFF																												3	17	28
GPT-7-150		NAVDAT		A geochemical and strontium isotopic investigation of Laramide and younger igneous rocks in central Colorado, with emphasis on the petrogenesis of the Thirtynine Mile volcanic field	Thesis or dissertation; Doctoral; Monographic	Campbell, Steven Kent		38.6	-105.6	0.01	31.9	32.8	33.7	AAS	IGNEOUS	VOLCANIC	FELSIC	TUFF				14.33		1.89		0.63				0.53			4.07	5.6
GPT-7-150		NAVDAT		A geochemical and strontium isotopic investigation of Laramide and younger igneous rocks in central Colorado, with emphasis on the petrogenesis of the Thirtynine Mile volcanic field	Thesis or dissertation; Doctoral; Monographic	Campbell, Steven Kent		38.6	-105.6	0.01	31.9	32.8	33.7	UNKNOWN	IGNEOUS	VOLCANIC	FELSIC	TUFF											0.04
GPT-7-150		NAVDAT		A geochemical and strontium isotopic investigation of Laramide and younger igneous rocks in central Colorado, with emphasis on the petrogenesis of the Thirtynine Mile volcanic field	Thesis or dissertation; Doctoral; Monographic	Campbell, Steven Kent		38.6	-105.6	0.01	31.9	32.8	33.7	UV-VIS COLORIMETRY	IGNEOUS	VOLCANIC	FELSIC	TUFF		71.21
GPT-7-150		NAVDAT		A geochemical and strontium isotopic investigation of Laramide and younger igneous rocks in central Colorado, with emphasis on the petrogenesis of the Thirtynine Mile volcanic field	Thesis or dissertation; Doctoral; Monographic	Campbell, Steven Kent		38.6	-105.6	0.01	31.9	32.8	33.7	ICP	IGNEOUS	VOLCANIC	FELSIC	TUFF
GPT-7-150		NAVDAT		A geochemical and strontium isotopic investigation of Laramide and younger igneous rocks in central Colorado, with emphasis on the petrogenesis of the Thirtynine Mile volcanic field	Thesis or dissertation; Doctoral; Monographic	Campbell, Steven Kent		38.6	-105.6	0.01	31.9	32.8	33.7	LOI	IGNEOUS	VOLCANIC	FELSIC	TUFF																			1.1
GPT-7-150		NAVDAT		A geochemical and strontium isotopic investigation of Laramide and younger igneous rocks in central Colorado, with emphasis on the petrogenesis of the Thirtynine Mile volcanic field	Thesis or dissertation; Doctoral; Monographic	Campbell, Steven Kent		38.6	-105.6	0.01	31.9	32.8	33.7	GAMMA-RAY COUNTING	IGNEOUS	VOLCANIC	FELSIC	TUFF
GPT-8-151		NAVDAT		A geochemical and strontium isotopic investigation of Laramide and younger igneous rocks in central Colorado, with emphasis on the petrogenesis of the Thirtynine Mile volcanic field	Thesis or dissertation; Doctoral; Monographic	Campbell, Steven Kent		38.6	-105.6	0.01	28	33	38	GAMMA-RAY COUNTING	IGNEOUS	VOLCANIC	FELSIC	TUFF
GPT-8-151		NAVDAT		A geochemical and strontium isotopic investigation of Laramide and younger igneous rocks in central Colorado, with emphasis on the petrogenesis of the Thirtynine Mile volcanic field	Thesis or dissertation; Doctoral; Monographic	Campbell, Steven Kent		38.6	-105.6	0.01	28	33	38	XRF	IGNEOUS	VOLCANIC	FELSIC	TUFF			0.26										0.65				0.07
GPT-8-151		NAVDAT		A geochemical and strontium isotopic investigation of Laramide and younger igneous rocks in central Colorado, with emphasis on the petrogenesis of the Thirtynine Mile volcanic field	Thesis or dissertation; Doctoral; Monographic	Campbell, Steven Kent		38.6	-105.6	0.01	28	33	38	AAS	IGNEOUS	VOLCANIC	FELSIC	TUFF				14.01		1.36		0				0.33			4.11	5.41
GPT-8-151		NAVDAT		A geochemical and strontium isotopic investigation of Laramide and younger igneous rocks in central Colorado, with emphasis on the petrogenesis of the Thirtynine Mile volcanic field	Thesis or dissertation; Doctoral; Monographic	Campbell, Steven Kent		38.6	-105.6	0.01	28	33	38	UNKNOWN	IGNEOUS	VOLCANIC	FELSIC	TUFF											0.09
GPT-8-151		NAVDAT		A geochemical and strontium isotopic investigation of Laramide and younger igneous rocks in central Colorado, with emphasis on the petrogenesis of the Thirtynine Mile volcanic field	Thesis or dissertation; Doctoral; Monographic	Campbell, Steven Kent		38.6	-105.6	0.01	28	33	38	UV-VIS COLORIMETRY	IGNEOUS	VOLCANIC	FELSIC	TUFF		73.7
GPT-8-151		NAVDAT		A geochemical and strontium isotopic investigation of Laramide and younger igneous rocks in central Colorado, with emphasis on the petrogenesis of the Thirtynine Mile volcanic field	Thesis or dissertation; Doctoral; Monographic	Campbell, Steven Kent		38.6	-105.6	0.01	28	33	38	ICP	IGNEOUS	VOLCANIC	FELSIC	TUFF
GPT-8-151		NAVDAT		A geochemical and strontium isotopic investigation of Laramide and younger igneous rocks in central Colorado, with emphasis on the petrogenesis of the Thirtynine Mile volcanic field	Thesis or dissertation; Doctoral; Monographic	Campbell, Steven Kent		38.6	-105.6	0.01	28	33	38	LOI	IGNEOUS	VOLCANIC	FELSIC	TUFF																			0.93
IRT-1-140		NAVDAT		A geochemical and strontium isotopic investigation of Laramide and younger igneous rocks in central Colorado, with emphasis on the petrogenesis of the Thirtynine Mile volcanic field	Thesis or dissertation; Doctoral; Monographic	Campbell, Steven Kent		39.231	-105.809	1e-05	30	35	40	XRF	IGNEOUS	VOLCANIC	FELSIC	TUFF			0.4										5.34				0.14
IRT-1-140		NAVDAT		A geochemical and strontium isotopic investigation of Laramide and younger igneous rocks in central Colorado, with emphasis on the petrogenesis of the Thirtynine Mile volcanic field	Thesis or dissertation; Doctoral; Monographic	Campbell, Steven Kent		39.231	-105.809	1e-05	30	35	40	UNKNOWN	IGNEOUS	VOLCANIC	FELSIC	TUFF																												3	13	3
IRT-1-140		NAVDAT		A geochemical and strontium isotopic investigation of Laramide and younger igneous rocks in central Colorado, with emphasis on the petrogenesis of the Thirtynine Mile volcanic field	Thesis or dissertation; Doctoral; Monographic	Campbell, Steven Kent		39.231	-105.809	1e-05	30	35	40	AAS	IGNEOUS	VOLCANIC	FELSIC	TUFF				15.86		1.95		1.46				1.24			2.85	1.66
IRT-1-140		NAVDAT		A geochemical and strontium isotopic investigation of Laramide and younger igneous rocks in central Colorado, with emphasis on the petrogenesis of the Thirtynine Mile volcanic field	Thesis or dissertation; Doctoral; Monographic	Campbell, Steven Kent		39.231	-105.809	1e-05	30	35	40	UNKNOWN	IGNEOUS	VOLCANIC	FELSIC	TUFF											0.07
IRT-1-140		NAVDAT		A geochemical and strontium isotopic investigation of Laramide and younger igneous rocks in central Colorado, with emphasis on the petrogenesis of the Thirtynine Mile volcanic field	Thesis or dissertation; Doctoral; Monographic	Campbell, Steven Kent		39.231	-105.809	1e-05	30	35	40	UV-VIS COLORIMETRY	IGNEOUS	VOLCANIC	FELSIC	TUFF		69.03
IRT-1-140		NAVDAT		A geochemical and strontium isotopic investigation of Laramide and younger igneous rocks in central Colorado, with emphasis on the petrogenesis of the Thirtynine Mile volcanic field	Thesis or dissertation; Doctoral; Monographic	Campbell, Steven Kent		39.231	-105.809	1e-05	30	35	40	ICP	IGNEOUS	VOLCANIC	FELSIC	TUFF
IRT-1-140		NAVDAT		A geochemical and strontium isotopic investigation of Laramide and younger igneous rocks in central Colorado, with emphasis on the petrogenesis of the Thirtynine Mile volcanic field	Thesis or dissertation; Doctoral; Monographic	Campbell, Steven Kent		39.231	-105.809	1e-05	30	35	40	LOI	IGNEOUS	VOLCANIC	FELSIC	TUFF																			3.92
IRT-1-140		NAVDAT		A geochemical and strontium isotopic investigation of Laramide and younger igneous rocks in central Colorado, with emphasis on the petrogenesis of the Thirtynine Mile volcanic field	Thesis or dissertation; Doctoral; Monographic	Campbell, Steven Kent		39.231	-105.809	1e-05	30	35	40	GAMMA-RAY COUNTING	IGNEOUS	VOLCANIC	FELSIC	TUFF
KGT-I-98		NAVDAT		A geochemical and strontium isotopic investigation of Laramide and younger igneous rocks in central Colorado, with emphasis on the petrogenesis of the Thirtynine Mile volcanic field	Thesis or dissertation; Doctoral; Monographic	Campbell, Steven Kent		38.4102	-105.79	1e-05	23	28	33	XRF	IGNEOUS	VOLCANIC	FELSIC	TUFF			0.37										2.15				0.16
KGT-I-98		NAVDAT		A geochemical and strontium isotopic investigation of Laramide and younger igneous rocks in central Colorado, with emphasis on the petrogenesis of the Thirtynine Mile volcanic field	Thesis or dissertation; Doctoral; Monographic	Campbell, Steven Kent		38.4102	-105.79	1e-05	23	28	33	UNKNOWN	IGNEOUS	VOLCANIC	FELSIC	TUFF																												5	12	8
KGT-I-98		NAVDAT		A geochemical and strontium isotopic investigation of Laramide and younger igneous rocks in central Colorado, with emphasis on the petrogenesis of the Thirtynine Mile volcanic field	Thesis or dissertation; Doctoral; Monographic	Campbell, Steven Kent		38.4102	-105.79	1e-05	23	28	33	AAS	IGNEOUS	VOLCANIC	FELSIC	TUFF				14.41		1.88		1.31				0.74			2.28	6.91
KGT-I-98		NAVDAT		A geochemical and strontium isotopic investigation of Laramide and younger igneous rocks in central Colorado, with emphasis on the petrogenesis of the Thirtynine Mile volcanic field	Thesis or dissertation; Doctoral; Monographic	Campbell, Steven Kent		38.4102	-105.79	1e-05	23	28	33	UNKNOWN	IGNEOUS	VOLCANIC	FELSIC	TUFF											0.08
KGT-I-98		NAVDAT		A geochemical and strontium isotopic investigation of Laramide and younger igneous rocks in central Colorado, with emphasis on the petrogenesis of the Thirtynine Mile volcanic field	Thesis or dissertation; Doctoral; Monographic	Campbell, Steven Kent		38.4102	-105.79	1e-05	23	28	33	UV-VIS COLORIMETRY	IGNEOUS	VOLCANIC	FELSIC	TUFF		69.71
KGT-I-98		NAVDAT		A geochemical and strontium isotopic investigation of Laramide and younger igneous rocks in central Colorado, with emphasis on the petrogenesis of the Thirtynine Mile volcanic field	Thesis or dissertation; Doctoral; Monographic	Campbell, Steven Kent		38.4102	-105.79	1e-05	23	28	33	ICP	IGNEOUS	VOLCANIC	FELSIC	TUFF
KGT-I-98		NAVDAT		A geochemical and strontium isotopic investigation of Laramide and younger igneous rocks in central Colorado, with emphasis on the petrogenesis of the Thirtynine Mile volcanic field	Thesis or dissertation; Doctoral; Monographic	Campbell, Steven Kent		38.4102	-105.79	1e-05	23	28	33	LOI	IGNEOUS	VOLCANIC	FELSIC	TUFF																			1.16
KGT-I-98		NAVDAT		A geochemical and strontium isotopic investigation of Laramide and younger igneous rocks in central Colorado, with emphasis on the petrogenesis of the Thirtynine Mile volcanic field	Thesis or dissertation; Doctoral; Monographic	Campbell, Steven Kent		38.4102	-105.79	1e-05	23	28	33	GAMMA-RAY COUNTING	IGNEOUS	VOLCANIC	FELSIC	TUFF
KGT-2-99		NAVDAT		A geochemical and strontium isotopic investigation of Laramide and younger igneous rocks in central Colorado, with emphasis on the petrogenesis of the Thirtynine Mile volcanic field	Thesis or dissertation; Doctoral; Monographic	Campbell, Steven Kent		38.4094	-105.792	1e-05	22.8	27.8	32.8	XRF	IGNEOUS	VOLCANIC	FELSIC	TUFF			0.34										1.88				0.12
KGT-2-99		NAVDAT		A geochemical and strontium isotopic investigation of Laramide and younger igneous rocks in central Colorado, with emphasis on the petrogenesis of the Thirtynine Mile volcanic field	Thesis or dissertation; Doctoral; Monographic	Campbell, Steven Kent		38.4094	-105.792	1e-05	22.8	27.8	32.8	UNKNOWN	IGNEOUS	VOLCANIC	FELSIC	TUFF																												5	10	7
KGT-2-99		NAVDAT		A geochemical and strontium isotopic investigation of Laramide and younger igneous rocks in central Colorado, with emphasis on the petrogenesis of the Thirtynine Mile volcanic field	Thesis or dissertation; Doctoral; Monographic	Campbell, Steven Kent		38.4094	-105.792	1e-05	22.8	27.8	32.8	AAS	IGNEOUS	VOLCANIC	FELSIC	TUFF				14.03		1.84		1.02				0.64			2.43	6.44
KGT-2-99		NAVDAT		A geochemical and strontium isotopic investigation of Laramide and younger igneous rocks in central Colorado, with emphasis on the petrogenesis of the Thirtynine Mile volcanic field	Thesis or dissertation; Doctoral; Monographic	Campbell, Steven Kent		38.4094	-105.792	1e-05	22.8	27.8	32.8	UNKNOWN	IGNEOUS	VOLCANIC	FELSIC	TUFF											0.07
KGT-2-99		NAVDAT		A geochemical and strontium isotopic investigation of Laramide and younger igneous rocks in central Colorado, with emphasis on the petrogenesis of the Thirtynine Mile volcanic field	Thesis or dissertation; Doctoral; Monographic	Campbell, Steven Kent		38.4094	-105.792	1e-05	22.8	27.8	32.8	UV-VIS COLORIMETRY	IGNEOUS	VOLCANIC	FELSIC	TUFF		71.19
KGT-2-99		NAVDAT		A geochemical and strontium isotopic investigation of Laramide and younger igneous rocks in central Colorado, with emphasis on the petrogenesis of the Thirtynine Mile volcanic field	Thesis or dissertation; Doctoral; Monographic	Campbell, Steven Kent		38.4094	-105.792	1e-05	22.8	27.8	32.8	ICP	IGNEOUS	VOLCANIC	FELSIC	TUFF
KGT-2-99		NAVDAT		A geochemical and strontium isotopic investigation of Laramide and younger igneous rocks in central Colorado, with emphasis on the petrogenesis of the Thirtynine Mile volcanic field	Thesis or dissertation; Doctoral; Monographic	Campbell, Steven Kent		38.4094	-105.792	1e-05	22.8	27.8	32.8	LOI	IGNEOUS	VOLCANIC	FELSIC	TUFF																			0.77
KGT-2-99		NAVDAT		A geochemical and strontium isotopic investigation of Laramide and younger igneous rocks in central Colorado, with emphasis on the petrogenesis of the Thirtynine Mile volcanic field	Thesis or dissertation; Doctoral; Monographic	Campbell, Steven Kent		38.4094	-105.792	1e-05	22.8	27.8	32.8	GAMMA-RAY COUNTING	IGNEOUS	VOLCANIC	FELSIC	TUFF
KGT-3-106		NAVDAT		A geochemical and strontium isotopic investigation of Laramide and younger igneous rocks in central Colorado, with emphasis on the petrogenesis of the Thirtynine Mile volcanic field	Thesis or dissertation; Doctoral; Monographic	Campbell, Steven Kent		38.4255	-105.793	1e-05	23	28	33	XRF	IGNEOUS	VOLCANIC	FELSIC	TUFF			0.32										2.35				0.12
KGT-3-106		NAVDAT		A geochemical and strontium isotopic investigation of Laramide and younger igneous rocks in central Colorado, with emphasis on the petrogenesis of the Thirtynine Mile volcanic field	Thesis or dissertation; Doctoral; Monographic	Campbell, Steven Kent		38.4255	-105.793	1e-05	23	28	33	UNKNOWN	IGNEOUS	VOLCANIC	FELSIC	TUFF																												2	11	5
KGT-3-106		NAVDAT		A geochemical and strontium isotopic investigation of Laramide and younger igneous rocks in central Colorado, with emphasis on the petrogenesis of the Thirtynine Mile volcanic field	Thesis or dissertation; Doctoral; Monographic	Campbell, Steven Kent		38.4255	-105.793	1e-05	23	28	33	AAS	IGNEOUS	VOLCANIC	FELSIC	TUFF				14.06		1.81		0.69				0.55			3.7	4.66
KGT-3-106		NAVDAT		A geochemical and strontium isotopic investigation of Laramide and younger igneous rocks in central Colorado, with emphasis on the petrogenesis of the Thirtynine Mile volcanic field	Thesis or dissertation; Doctoral; Monographic	Campbell, Steven Kent		38.4255	-105.793	1e-05	23	28	33	UNKNOWN	IGNEOUS	VOLCANIC	FELSIC	TUFF											0.05
KGT-3-106		NAVDAT		A geochemical and strontium isotopic investigation of Laramide and younger igneous rocks in central Colorado, with emphasis on the petrogenesis of the Thirtynine Mile volcanic field	Thesis or dissertation; Doctoral; Monographic	Campbell, Steven Kent		38.4255	-105.793	1e-05	23	28	33	UV-VIS COLORIMETRY	IGNEOUS	VOLCANIC	FELSIC	TUFF		71.68
KGT-3-106		NAVDAT		A geochemical and strontium isotopic investigation of Laramide and younger igneous rocks in central Colorado, with emphasis on the petrogenesis of the Thirtynine Mile volcanic field	Thesis or dissertation; Doctoral; Monographic	Campbell, Steven Kent		38.4255	-105.793	1e-05	23	28	33	ICP	IGNEOUS	VOLCANIC	FELSIC	TUFF
KGT-3-106		NAVDAT		A geochemical and strontium isotopic investigation of Laramide and younger igneous rocks in central Colorado, with emphasis on the petrogenesis of the Thirtynine Mile volcanic field	Thesis or dissertation; Doctoral; Monographic	Campbell, Steven Kent		38.4255	-105.793	1e-05	23	28	33	LOI	IGNEOUS	VOLCANIC	FELSIC	TUFF																			0.67
KGT-3-106		NAVDAT		A geochemical and strontium isotopic investigation of Laramide and younger igneous rocks in central Colorado, with emphasis on the petrogenesis of the Thirtynine Mile volcanic field	Thesis or dissertation; Doctoral; Monographic	Campbell, Steven Kent		38.4255	-105.793	1e-05	23	28	33	GAMMA-RAY COUNTING	IGNEOUS	VOLCANIC	FELSIC	TUFF
LST-1-136		NAVDAT		A geochemical and strontium isotopic investigation of Laramide and younger igneous rocks in central Colorado, with emphasis on the petrogenesis of the Thirtynine Mile volcanic field	Thesis or dissertation; Doctoral; Monographic	Campbell, Steven Kent		39.2573	-105.826	1e-05	52	57	62	XRF	IGNEOUS	VOLCANIC	FELSIC	TUFF			0.42										5.87				0.19
LST-1-136		NAVDAT		A geochemical and strontium isotopic investigation of Laramide and younger igneous rocks in central Colorado, with emphasis on the petrogenesis of the Thirtynine Mile volcanic field	Thesis or dissertation; Doctoral; Monographic	Campbell, Steven Kent		39.2573	-105.826	1e-05	52	57	62	UNKNOWN	IGNEOUS	VOLCANIC	FELSIC	TUFF																												5	15	4
LST-1-136		NAVDAT		A geochemical and strontium isotopic investigation of Laramide and younger igneous rocks in central Colorado, with emphasis on the petrogenesis of the Thirtynine Mile volcanic field	Thesis or dissertation; Doctoral; Monographic	Campbell, Steven Kent		39.2573	-105.826	1e-05	52	57	62	AAS	IGNEOUS	VOLCANIC	FELSIC	TUFF				16.76		1.97		1.28				1.45			3.03	1.58
LST-1-136		NAVDAT		A geochemical and strontium isotopic investigation of Laramide and younger igneous rocks in central Colorado, with emphasis on the petrogenesis of the Thirtynine Mile volcanic field	Thesis or dissertation; Doctoral; Monographic	Campbell, Steven Kent		39.2573	-105.826	1e-05	52	57	62	UNKNOWN	IGNEOUS	VOLCANIC	FELSIC	TUFF											0.08
LST-1-136		NAVDAT		A geochemical and strontium isotopic investigation of Laramide and younger igneous rocks in central Colorado, with emphasis on the petrogenesis of the Thirtynine Mile volcanic field	Thesis or dissertation; Doctoral; Monographic	Campbell, Steven Kent		39.2573	-105.826	1e-05	52	57	62	UV-VIS COLORIMETRY	IGNEOUS	VOLCANIC	FELSIC	TUFF		67.38
LST-1-136		NAVDAT		A geochemical and strontium isotopic investigation of Laramide and younger igneous rocks in central Colorado, with emphasis on the petrogenesis of the Thirtynine Mile volcanic field	Thesis or dissertation; Doctoral; Monographic	Campbell, Steven Kent		39.2573	-105.826	1e-05	52	57	62	ICP	IGNEOUS	VOLCANIC	FELSIC	TUFF
LST-1-136		NAVDAT		A geochemical and strontium isotopic investigation of Laramide and younger igneous rocks in central Colorado, with emphasis on the petrogenesis of the Thirtynine Mile volcanic field	Thesis or dissertation; Doctoral; Monographic	Campbell, Steven Kent		39.2573	-105.826	1e-05	52	57	62	LOI	IGNEOUS	VOLCANIC	FELSIC	TUFF																			3.95
LST-1-136		NAVDAT		A geochemical and strontium isotopic investigation of Laramide and younger igneous rocks in central Colorado, with emphasis on the petrogenesis of the Thirtynine Mile volcanic field	Thesis or dissertation; Doctoral; Monographic	Campbell, Steven Kent		39.2573	-105.826	1e-05	52	57	62	GAMMA-RAY COUNTING	IGNEOUS	VOLCANIC	FELSIC	TUFF
LST-2-137		NAVDAT		A geochemical and strontium isotopic investigation of Laramide and younger igneous rocks in central Colorado, with emphasis on the petrogenesis of the Thirtynine Mile volcanic field	Thesis or dissertation; Doctoral; Monographic	Campbell, Steven Kent		39.2041	-105.814	1e-05	52	57	62	XRF	IGNEOUS	VOLCANIC	FELSIC	TUFF			0.35										5.51				0.15
LST-2-137		NAVDAT		A geochemical and strontium isotopic investigation of Laramide and younger igneous rocks in central Colorado, with emphasis on the petrogenesis of the Thirtynine Mile volcanic field	Thesis or dissertation; Doctoral; Monographic	Campbell, Steven Kent		39.2041	-105.814	1e-05	52	57	62	UNKNOWN	IGNEOUS	VOLCANIC	FELSIC	TUFF																												4	13	4
LST-2-137		NAVDAT		A geochemical and strontium isotopic investigation of Laramide and younger igneous rocks in central Colorado, with emphasis on the petrogenesis of the Thirtynine Mile volcanic field	Thesis or dissertation; Doctoral; Monographic	Campbell, Steven Kent		39.2041	-105.814	1e-05	52	57	62	AAS	IGNEOUS	VOLCANIC	FELSIC	TUFF				17.33		1.88		1.23				1.28			3.15	1.7
LST-2-137		NAVDAT		A geochemical and strontium isotopic investigation of Laramide and younger igneous rocks in central Colorado, with emphasis on the petrogenesis of the Thirtynine Mile volcanic field	Thesis or dissertation; Doctoral; Monographic	Campbell, Steven Kent		39.2041	-105.814	1e-05	52	57	62	UNKNOWN	IGNEOUS	VOLCANIC	FELSIC	TUFF											0.09
LST-2-137		NAVDAT		A geochemical and strontium isotopic investigation of Laramide and younger igneous rocks in central Colorado, with emphasis on the petrogenesis of the Thirtynine Mile volcanic field	Thesis or dissertation; Doctoral; Monographic	Campbell, Steven Kent		39.2041	-105.814	1e-05	52	57	62	UV-VIS COLORIMETRY	IGNEOUS	VOLCANIC	FELSIC	TUFF		67.35
LST-2-137		NAVDAT		A geochemical and strontium isotopic investigation of Laramide and younger igneous rocks in central Colorado, with emphasis on the petrogenesis of the Thirtynine Mile volcanic field	Thesis or dissertation; Doctoral; Monographic	Campbell, Steven Kent		39.2041	-105.814	1e-05	52	57	62	ICP	IGNEOUS	VOLCANIC	FELSIC	TUFF
LST-2-137		NAVDAT		A geochemical and strontium isotopic investigation of Laramide and younger igneous rocks in central Colorado, with emphasis on the petrogenesis of the Thirtynine Mile volcanic field	Thesis or dissertation; Doctoral; Monographic	Campbell, Steven Kent		39.2041	-105.814	1e-05	52	57	62	LOI	IGNEOUS	VOLCANIC	FELSIC	TUFF																			2.94
LST-2-137		NAVDAT		A geochemical and strontium isotopic investigation of Laramide and younger igneous rocks in central Colorado, with emphasis on the petrogenesis of the Thirtynine Mile volcanic field	Thesis or dissertation; Doctoral; Monographic	Campbell, Steven Kent		39.2041	-105.814	1e-05	52	57	62	GAMMA-RAY COUNTING	IGNEOUS	VOLCANIC	FELSIC	TUFF
SRT-1-48		NAVDAT		A geochemical and strontium isotopic investigation of Laramide and younger igneous rocks in central Colorado, with emphasis on the petrogenesis of the Thirtynine Mile volcanic field	Thesis or dissertation; Doctoral; Monographic	Campbell, Steven Kent		38.6514	-105.628	1e-05	31.7	36.7	41.7	XRF	IGNEOUS	VOLCANIC	FELSIC	TUFF			0.49										1.24				0.07
SRT-1-48		NAVDAT		A geochemical and strontium isotopic investigation of Laramide and younger igneous rocks in central Colorado, with emphasis on the petrogenesis of the Thirtynine Mile volcanic field	Thesis or dissertation; Doctoral; Monographic	Campbell, Steven Kent		38.6514	-105.628	1e-05	31.7	36.7	41.7	UNKNOWN	IGNEOUS	VOLCANIC	FELSIC	TUFF																												3	10	2
SRT-1-48		NAVDAT		A geochemical and strontium isotopic investigation of Laramide and younger igneous rocks in central Colorado, with emphasis on the petrogenesis of the Thirtynine Mile volcanic field	Thesis or dissertation; Doctoral; Monographic	Campbell, Steven Kent		38.6514	-105.628	1e-05	31.7	36.7	41.7	AAS	IGNEOUS	VOLCANIC	FELSIC	TUFF				15.99		1.99		0.01				0.25			4.02	6.23
SRT-1-48		NAVDAT		A geochemical and strontium isotopic investigation of Laramide and younger igneous rocks in central Colorado, with emphasis on the petrogenesis of the Thirtynine Mile volcanic field	Thesis or dissertation; Doctoral; Monographic	Campbell, Steven Kent		38.6514	-105.628	1e-05	31.7	36.7	41.7	UNKNOWN	IGNEOUS	VOLCANIC	FELSIC	TUFF											0.03
SRT-1-48		NAVDAT		A geochemical and strontium isotopic investigation of Laramide and younger igneous rocks in central Colorado, with emphasis on the petrogenesis of the Thirtynine Mile volcanic field	Thesis or dissertation; Doctoral; Monographic	Campbell, Steven Kent		38.6514	-105.628	1e-05	31.7	36.7	41.7	UV-VIS COLORIMETRY	IGNEOUS	VOLCANIC	FELSIC	TUFF		69.69
SRT-1-48		NAVDAT		A geochemical and strontium isotopic investigation of Laramide and younger igneous rocks in central Colorado, with emphasis on the petrogenesis of the Thirtynine Mile volcanic field	Thesis or dissertation; Doctoral; Monographic	Campbell, Steven Kent		38.6514	-105.628	1e-05	31.7	36.7	41.7	ICP	IGNEOUS	VOLCANIC	FELSIC	TUFF
SRT-1-48		NAVDAT		A geochemical and strontium isotopic investigation of Laramide and younger igneous rocks in central Colorado, with emphasis on the petrogenesis of the Thirtynine Mile volcanic field	Thesis or dissertation; Doctoral; Monographic	Campbell, Steven Kent		38.6514	-105.628	1e-05	31.7	36.7	41.7	LOI	IGNEOUS	VOLCANIC	FELSIC	TUFF																			0.95
SRT-1-48		NAVDAT		A geochemical and strontium isotopic investigation of Laramide and younger igneous rocks in central Colorado, with emphasis on the petrogenesis of the Thirtynine Mile volcanic field	Thesis or dissertation; Doctoral; Monographic	Campbell, Steven Kent		38.6514	-105.628	1e-05	31.7	36.7	41.7	GAMMA-RAY COUNTING	IGNEOUS	VOLCANIC	FELSIC	TUFF
TRT-1-13		NAVDAT		A geochemical and strontium isotopic investigation of Laramide and younger igneous rocks in central Colorado, with emphasis on the petrogenesis of the Thirtynine Mile volcanic field	Thesis or dissertation; Doctoral; Monographic	Campbell, Steven Kent		38.5646	-105.55	1e-05	29	34	39	XRF	IGNEOUS	VOLCANIC	FELSIC	TUFF			0.17										0.63				0.03
TRT-1-13		NAVDAT		A geochemical and strontium isotopic investigation of Laramide and younger igneous rocks in central Colorado, with emphasis on the petrogenesis of the Thirtynine Mile volcanic field	Thesis or dissertation; Doctoral; Monographic	Campbell, Steven Kent		38.5646	-105.55	1e-05	29	34	39	UNKNOWN	IGNEOUS	VOLCANIC	FELSIC	TUFF																												6	6	2
TRT-1-13		NAVDAT		A geochemical and strontium isotopic investigation of Laramide and younger igneous rocks in central Colorado, with emphasis on the petrogenesis of the Thirtynine Mile volcanic field	Thesis or dissertation; Doctoral; Monographic	Campbell, Steven Kent		38.5646	-105.55	1e-05	29	34	39	AAS	IGNEOUS	VOLCANIC	FELSIC	TUFF				12.56		1.48		0				0.21			3.71	4.92
TRT-1-13		NAVDAT		A geochemical and strontium isotopic investigation of Laramide and younger igneous rocks in central Colorado, with emphasis on the petrogenesis of the Thirtynine Mile volcanic field	Thesis or dissertation; Doctoral; Monographic	Campbell, Steven Kent		38.5646	-105.55	1e-05	29	34	39	UNKNOWN	IGNEOUS	VOLCANIC	FELSIC	TUFF											0.06
TRT-1-13		NAVDAT		A geochemical and strontium isotopic investigation of Laramide and younger igneous rocks in central Colorado, with emphasis on the petrogenesis of the Thirtynine Mile volcanic field	Thesis or dissertation; Doctoral; Monographic	Campbell, Steven Kent		38.5646	-105.55	1e-05	29	34	39	UV-VIS COLORIMETRY	IGNEOUS	VOLCANIC	FELSIC	TUFF		76.22
TRT-1-13		NAVDAT		A geochemical and strontium isotopic investigation of Laramide and younger igneous rocks in central Colorado, with emphasis on the petrogenesis of the Thirtynine Mile volcanic field	Thesis or dissertation; Doctoral; Monographic	Campbell, Steven Kent		38.5646	-105.55	1e-05	29	34	39	ICP	IGNEOUS	VOLCANIC	FELSIC	TUFF
TRT-1-13		NAVDAT		A geochemical and strontium isotopic investigation of Laramide and younger igneous rocks in central Colorado, with emphasis on the petrogenesis of the Thirtynine Mile volcanic field	Thesis or dissertation; Doctoral; Monographic	Campbell, Steven Kent		38.5646	-105.55	1e-05	29	34	39	LOI	IGNEOUS	VOLCANIC	FELSIC	TUFF																			1.54
TRT-1-13		NAVDAT		A geochemical and strontium isotopic investigation of Laramide and younger igneous rocks in central Colorado, with emphasis on the petrogenesis of the Thirtynine Mile volcanic field	Thesis or dissertation; Doctoral; Monographic	Campbell, Steven Kent		38.5646	-105.55	1e-05	29	34	39	GAMMA-RAY COUNTING	IGNEOUS	VOLCANIC	FELSIC	TUFF
TRT-2-14		NAVDAT		A geochemical and strontium isotopic investigation of Laramide and younger igneous rocks in central Colorado, with emphasis on the petrogenesis of the Thirtynine Mile volcanic field	Thesis or dissertation; Doctoral; Monographic	Campbell, Steven Kent		38.5667	-105.555	1e-05	28.7	33.7	38.7	XRF	IGNEOUS	VOLCANIC	FELSIC	TUFF			0.19										0.63				0.03
TRT-2-14		NAVDAT		A geochemical and strontium isotopic investigation of Laramide and younger igneous rocks in central Colorado, with emphasis on the petrogenesis of the Thirtynine Mile volcanic field	Thesis or dissertation; Doctoral; Monographic	Campbell, Steven Kent		38.5667	-105.555	1e-05	28.7	33.7	38.7	UNKNOWN	IGNEOUS	VOLCANIC	FELSIC	TUFF																												2	7	2
TRT-2-14		NAVDAT		A geochemical and strontium isotopic investigation of Laramide and younger igneous rocks in central Colorado, with emphasis on the petrogenesis of the Thirtynine Mile volcanic field	Thesis or dissertation; Doctoral; Monographic	Campbell, Steven Kent		38.5667	-105.555	1e-05	28.7	33.7	38.7	AAS	IGNEOUS	VOLCANIC	FELSIC	TUFF				12.83		1.27		0				0.25			3.79	5.46
TRT-2-14		NAVDAT		A geochemical and strontium isotopic investigation of Laramide and younger igneous rocks in central Colorado, with emphasis on the petrogenesis of the Thirtynine Mile volcanic field	Thesis or dissertation; Doctoral; Monographic	Campbell, Steven Kent		38.5667	-105.555	1e-05	28.7	33.7	38.7	UNKNOWN	IGNEOUS	VOLCANIC	FELSIC	TUFF											0.04
TRT-2-14		NAVDAT		A geochemical and strontium isotopic investigation of Laramide and younger igneous rocks in central Colorado, with emphasis on the petrogenesis of the Thirtynine Mile volcanic field	Thesis or dissertation; Doctoral; Monographic	Campbell, Steven Kent		38.5667	-105.555	1e-05	28.7	33.7	38.7	UV-VIS COLORIMETRY	IGNEOUS	VOLCANIC	FELSIC	TUFF		75.51
TRT-2-14		NAVDAT		A geochemical and strontium isotopic investigation of Laramide and younger igneous rocks in central Colorado, with emphasis on the petrogenesis of the Thirtynine Mile volcanic field	Thesis or dissertation; Doctoral; Monographic	Campbell, Steven Kent		38.5667	-105.555	1e-05	28.7	33.7	38.7	ICP	IGNEOUS	VOLCANIC	FELSIC	TUFF
TRT-2-14		NAVDAT		A geochemical and strontium isotopic investigation of Laramide and younger igneous rocks in central Colorado, with emphasis on the petrogenesis of the Thirtynine Mile volcanic field	Thesis or dissertation; Doctoral; Monographic	Campbell, Steven Kent		38.5667	-105.555	1e-05	28.7	33.7	38.7	LOI	IGNEOUS	VOLCANIC	FELSIC	TUFF																			1.42
TRT-2-14		NAVDAT		A geochemical and strontium isotopic investigation of Laramide and younger igneous rocks in central Colorado, with emphasis on the petrogenesis of the Thirtynine Mile volcanic field	Thesis or dissertation; Doctoral; Monographic	Campbell, Steven Kent		38.5667	-105.555	1e-05	28.7	33.7	38.7	GAMMA-RAY COUNTING	IGNEOUS	VOLCANIC	FELSIC	TUFF
TTC-1-82		NAVDAT		A geochemical and strontium isotopic investigation of Laramide and younger igneous rocks in central Colorado, with emphasis on the petrogenesis of the Thirtynine Mile volcanic field	Thesis or dissertation; Doctoral; Monographic	Campbell, Steven Kent		38.4677	-106.408	1e-05	30	35	40	XRF	IGNEOUS	VOLCANIC	FELSIC	TUFF			0.41										3.86				0.23
TTC-1-82		NAVDAT		A geochemical and strontium isotopic investigation of Laramide and younger igneous rocks in central Colorado, with emphasis on the petrogenesis of the Thirtynine Mile volcanic field	Thesis or dissertation; Doctoral; Monographic	Campbell, Steven Kent		38.4677	-106.408	1e-05	30	35	40	UNKNOWN	IGNEOUS	VOLCANIC	FELSIC	TUFF																												16	17	17
TTC-1-82		NAVDAT		A geochemical and strontium isotopic investigation of Laramide and younger igneous rocks in central Colorado, with emphasis on the petrogenesis of the Thirtynine Mile volcanic field	Thesis or dissertation; Doctoral; Monographic	Campbell, Steven Kent		38.4677	-106.408	1e-05	30	35	40	AAS	IGNEOUS	VOLCANIC	FELSIC	TUFF				16.04		1.94		2.62				1.37			3.66	4.25
TTC-1-82		NAVDAT		A geochemical and strontium isotopic investigation of Laramide and younger igneous rocks in central Colorado, with emphasis on the petrogenesis of the Thirtynine Mile volcanic field	Thesis or dissertation; Doctoral; Monographic	Campbell, Steven Kent		38.4677	-106.408	1e-05	30	35	40	UNKNOWN	IGNEOUS	VOLCANIC	FELSIC	TUFF											0.06
TTC-1-82		NAVDAT		A geochemical and strontium isotopic investigation of Laramide and younger igneous rocks in central Colorado, with emphasis on the petrogenesis of the Thirtynine Mile volcanic field	Thesis or dissertation; Doctoral; Monographic	Campbell, Steven Kent		38.4677	-106.408	1e-05	30	35	40	UV-VIS COLORIMETRY	IGNEOUS	VOLCANIC	FELSIC	TUFF		65.56
TTC-1-82		NAVDAT		A geochemical and strontium isotopic investigation of Laramide and younger igneous rocks in central Colorado, with emphasis on the petrogenesis of the Thirtynine Mile volcanic field	Thesis or dissertation; Doctoral; Monographic	Campbell, Steven Kent		38.4677	-106.408	1e-05	30	35	40	ICP	IGNEOUS	VOLCANIC	FELSIC	TUFF
TTC-1-82		NAVDAT		A geochemical and strontium isotopic investigation of Laramide and younger igneous rocks in central Colorado, with emphasis on the petrogenesis of the Thirtynine Mile volcanic field	Thesis or dissertation; Doctoral; Monographic	Campbell, Steven Kent		38.4677	-106.408	1e-05	30	35	40	LOI	IGNEOUS	VOLCANIC	FELSIC	TUFF																			0.95
TTC-1-82		NAVDAT		A geochemical and strontium isotopic investigation of Laramide and younger igneous rocks in central Colorado, with emphasis on the petrogenesis of the Thirtynine Mile volcanic field	Thesis or dissertation; Doctoral; Monographic	Campbell, Steven Kent		38.4677	-106.408	1e-05	30	35	40	GAMMA-RAY COUNTING	IGNEOUS	VOLCANIC	FELSIC	TUFF
WMT-1-1		NAVDAT		A geochemical and strontium isotopic investigation of Laramide and younger igneous rocks in central Colorado, with emphasis on the petrogenesis of the Thirtynine Mile volcanic field	Thesis or dissertation; Doctoral; Monographic	Campbell, Steven Kent		38.6139	-105.576	1e-05	32	37	42	XRF	IGNEOUS	VOLCANIC	FELSIC	TUFF			0.45										0.5				0.05
WMT-1-1		NAVDAT		A geochemical and strontium isotopic investigation of Laramide and younger igneous rocks in central Colorado, with emphasis on the petrogenesis of the Thirtynine Mile volcanic field	Thesis or dissertation; Doctoral; Monographic	Campbell, Steven Kent		38.6139	-105.576	1e-05	32	37	42	UNKNOWN	IGNEOUS	VOLCANIC	FELSIC	TUFF																												2	7	2
WMT-1-1		NAVDAT		A geochemical and strontium isotopic investigation of Laramide and younger igneous rocks in central Colorado, with emphasis on the petrogenesis of the Thirtynine Mile volcanic field	Thesis or dissertation; Doctoral; Monographic	Campbell, Steven Kent		38.6139	-105.576	1e-05	32	37	42	AAS	IGNEOUS	VOLCANIC	FELSIC	TUFF				15.1		1.85		0				0.25			3.15	6.01
WMT-1-1		NAVDAT		A geochemical and strontium isotopic investigation of Laramide and younger igneous rocks in central Colorado, with emphasis on the petrogenesis of the Thirtynine Mile volcanic field	Thesis or dissertation; Doctoral; Monographic	Campbell, Steven Kent		38.6139	-105.576	1e-05	32	37	42	UNKNOWN	IGNEOUS	VOLCANIC	FELSIC	TUFF											0.01
WMT-1-1		NAVDAT		A geochemical and strontium isotopic investigation of Laramide and younger igneous rocks in central Colorado, with emphasis on the petrogenesis of the Thirtynine Mile volcanic field	Thesis or dissertation; Doctoral; Monographic	Campbell, Steven Kent		38.6139	-105.576	1e-05	32	37	42	UV-VIS COLORIMETRY	IGNEOUS	VOLCANIC	FELSIC	TUFF		72.62
WMT-1-1		NAVDAT		A geochemical and strontium isotopic investigation of Laramide and younger igneous rocks in central Colorado, with emphasis on the petrogenesis of the Thirtynine Mile volcanic field	Thesis or dissertation; Doctoral; Monographic	Campbell, Steven Kent		38.6139	-105.576	1e-05	32	37	42	ICP	IGNEOUS	VOLCANIC	FELSIC	TUFF
WMT-1-1		NAVDAT		A geochemical and strontium isotopic investigation of Laramide and younger igneous rocks in central Colorado, with emphasis on the petrogenesis of the Thirtynine Mile volcanic field	Thesis or dissertation; Doctoral; Monographic	Campbell, Steven Kent		38.6139	-105.576	1e-05	32	37	42	LOI	IGNEOUS	VOLCANIC	FELSIC	TUFF																			1.81
WMT-1-1		NAVDAT		A geochemical and strontium isotopic investigation of Laramide and younger igneous rocks in central Colorado, with emphasis on the petrogenesis of the Thirtynine Mile volcanic field	Thesis or dissertation; Doctoral; Monographic	Campbell, Steven Kent		38.6139	-105.576	1e-05	32	37	42	GAMMA-RAY COUNTING	IGNEOUS	VOLCANIC	FELSIC	TUFF
WMT-2-9		NAVDAT		A geochemical and strontium isotopic investigation of Laramide and younger igneous rocks in central Colorado, with emphasis on the petrogenesis of the Thirtynine Mile volcanic field	Thesis or dissertation; Doctoral; Monographic	Campbell, Steven Kent		38.8626	-105.348	1e-05	32	37	42	XRF	IGNEOUS	VOLCANIC	FELSIC	TUFF			0.48										1.25				0.07
WMT-2-9		NAVDAT		A geochemical and strontium isotopic investigation of Laramide and younger igneous rocks in central Colorado, with emphasis on the petrogenesis of the Thirtynine Mile volcanic field	Thesis or dissertation; Doctoral; Monographic	Campbell, Steven Kent		38.8626	-105.348	1e-05	32	37	42	UNKNOWN	IGNEOUS	VOLCANIC	FELSIC	TUFF																												6	8	4
WMT-2-9		NAVDAT		A geochemical and strontium isotopic investigation of Laramide and younger igneous rocks in central Colorado, with emphasis on the petrogenesis of the Thirtynine Mile volcanic field	Thesis or dissertation; Doctoral; Monographic	Campbell, Steven Kent		38.8626	-105.348	1e-05	32	37	42	AAS	IGNEOUS	VOLCANIC	FELSIC	TUFF				15.19		1.97		0.29				0.3			3.97	5.76
WMT-2-9		NAVDAT		A geochemical and strontium isotopic investigation of Laramide and younger igneous rocks in central Colorado, with emphasis on the petrogenesis of the Thirtynine Mile volcanic field	Thesis or dissertation; Doctoral; Monographic	Campbell, Steven Kent		38.8626	-105.348	1e-05	32	37	42	UNKNOWN	IGNEOUS	VOLCANIC	FELSIC	TUFF											0.04
WMT-2-9		NAVDAT		A geochemical and strontium isotopic investigation of Laramide and younger igneous rocks in central Colorado, with emphasis on the petrogenesis of the Thirtynine Mile volcanic field	Thesis or dissertation; Doctoral; Monographic	Campbell, Steven Kent		38.8626	-105.348	1e-05	32	37	42	UV-VIS COLORIMETRY	IGNEOUS	VOLCANIC	FELSIC	TUFF		70.68
WMT-2-9		NAVDAT		A geochemical and strontium isotopic investigation of Laramide and younger igneous rocks in central Colorado, with emphasis on the petrogenesis of the Thirtynine Mile volcanic field	Thesis or dissertation; Doctoral; Monographic	Campbell, Steven Kent		38.8626	-105.348	1e-05	32	37	42	ICP	IGNEOUS	VOLCANIC	FELSIC	TUFF
WMT-2-9		NAVDAT		A geochemical and strontium isotopic investigation of Laramide and younger igneous rocks in central Colorado, with emphasis on the petrogenesis of the Thirtynine Mile volcanic field	Thesis or dissertation; Doctoral; Monographic	Campbell, Steven Kent		38.8626	-105.348	1e-05	32	37	42	LOI	IGNEOUS	VOLCANIC	FELSIC	TUFF																			0.88
WMT-2-9		NAVDAT		A geochemical and strontium isotopic investigation of Laramide and younger igneous rocks in central Colorado, with emphasis on the petrogenesis of the Thirtynine Mile volcanic field	Thesis or dissertation; Doctoral; Monographic	Campbell, Steven Kent		38.8626	-105.348	1e-05	32	37	42	GAMMA-RAY COUNTING	IGNEOUS	VOLCANIC	FELSIC	TUFF
WMT-3-10		NAVDAT		A geochemical and strontium isotopic investigation of Laramide and younger igneous rocks in central Colorado, with emphasis on the petrogenesis of the Thirtynine Mile volcanic field	Thesis or dissertation; Doctoral; Monographic	Campbell, Steven Kent		38.9432	-105.568	1e-05	32	37	42	XRF	IGNEOUS	VOLCANIC	FELSIC	TUFF			0.46										0.57				0.07
WMT-3-10		NAVDAT		A geochemical and strontium isotopic investigation of Laramide and younger igneous rocks in central Colorado, with emphasis on the petrogenesis of the Thirtynine Mile volcanic field	Thesis or dissertation; Doctoral; Monographic	Campbell, Steven Kent		38.9432	-105.568	1e-05	32	37	42	UNKNOWN	IGNEOUS	VOLCANIC	FELSIC	TUFF																												4	6	3
WMT-3-10		NAVDAT		A geochemical and strontium isotopic investigation of Laramide and younger igneous rocks in central Colorado, with emphasis on the petrogenesis of the Thirtynine Mile volcanic field	Thesis or dissertation; Doctoral; Monographic	Campbell, Steven Kent		38.9432	-105.568	1e-05	32	37	42	AAS	IGNEOUS	VOLCANIC	FELSIC	TUFF				15.5		0.59		0				0.14			3.42	5.98
WMT-3-10		NAVDAT		A geochemical and strontium isotopic investigation of Laramide and younger igneous rocks in central Colorado, with emphasis on the petrogenesis of the Thirtynine Mile volcanic field	Thesis or dissertation; Doctoral; Monographic	Campbell, Steven Kent		38.9432	-105.568	1e-05	32	37	42	UNKNOWN	IGNEOUS	VOLCANIC	FELSIC	TUFF											0.01
WMT-3-10		NAVDAT		A geochemical and strontium isotopic investigation of Laramide and younger igneous rocks in central Colorado, with emphasis on the petrogenesis of the Thirtynine Mile volcanic field	Thesis or dissertation; Doctoral; Monographic	Campbell, Steven Kent		38.9432	-105.568	1e-05	32	37	42	UV-VIS COLORIMETRY	IGNEOUS	VOLCANIC	FELSIC	TUFF		73.26
WMT-3-10		NAVDAT		A geochemical and strontium isotopic investigation of Laramide and younger igneous rocks in central Colorado, with emphasis on the petrogenesis of the Thirtynine Mile volcanic field	Thesis or dissertation; Doctoral; Monographic	Campbell, Steven Kent		38.9432	-105.568	1e-05	32	37	42	ICP	IGNEOUS	VOLCANIC	FELSIC	TUFF
WMT-3-10		NAVDAT		A geochemical and strontium isotopic investigation of Laramide and younger igneous rocks in central Colorado, with emphasis on the petrogenesis of the Thirtynine Mile volcanic field	Thesis or dissertation; Doctoral; Monographic	Campbell, Steven Kent		38.9432	-105.568	1e-05	32	37	42	LOI	IGNEOUS	VOLCANIC	FELSIC	TUFF																			1.53
WMT-3-10		NAVDAT		A geochemical and strontium isotopic investigation of Laramide and younger igneous rocks in central Colorado, with emphasis on the petrogenesis of the Thirtynine Mile volcanic field	Thesis or dissertation; Doctoral; Monographic	Campbell, Steven Kent		38.9432	-105.568	1e-05	32	37	42	GAMMA-RAY COUNTING	IGNEOUS	VOLCANIC	FELSIC	TUFF
WMT-4-26		NAVDAT		A geochemical and strontium isotopic investigation of Laramide and younger igneous rocks in central Colorado, with emphasis on the petrogenesis of the Thirtynine Mile volcanic field	Thesis or dissertation; Doctoral; Monographic	Campbell, Steven Kent		38.6528	-106.055	1e-05	31.7	36.7	41.7	XRF	IGNEOUS	VOLCANIC	FELSIC	TUFF			0.53										1.74				0.04
WMT-4-26		NAVDAT		A geochemical and strontium isotopic investigation of Laramide and younger igneous rocks in central Colorado, with emphasis on the petrogenesis of the Thirtynine Mile volcanic field	Thesis or dissertation; Doctoral; Monographic	Campbell, Steven Kent		38.6528	-106.055	1e-05	31.7	36.7	41.7	UNKNOWN	IGNEOUS	VOLCANIC	FELSIC	TUFF																												2	10	2
WMT-4-26		NAVDAT		A geochemical and strontium isotopic investigation of Laramide and younger igneous rocks in central Colorado, with emphasis on the petrogenesis of the Thirtynine Mile volcanic field	Thesis or dissertation; Doctoral; Monographic	Campbell, Steven Kent		38.6528	-106.055	1e-05	31.7	36.7	41.7	AAS	IGNEOUS	VOLCANIC	FELSIC	TUFF				16.12		1.99		0				0.34			3.4	6.04
WMT-4-26		NAVDAT		A geochemical and strontium isotopic investigation of Laramide and younger igneous rocks in central Colorado, with emphasis on the petrogenesis of the Thirtynine Mile volcanic field	Thesis or dissertation; Doctoral; Monographic	Campbell, Steven Kent		38.6528	-106.055	1e-05	31.7	36.7	41.7	UNKNOWN	IGNEOUS	VOLCANIC	FELSIC	TUFF											0.06
WMT-4-26		NAVDAT		A geochemical and strontium isotopic investigation of Laramide and younger igneous rocks in central Colorado, with emphasis on the petrogenesis of the Thirtynine Mile volcanic field	Thesis or dissertation; Doctoral; Monographic	Campbell, Steven Kent		38.6528	-106.055	1e-05	31.7	36.7	41.7	UV-VIS COLORIMETRY	IGNEOUS	VOLCANIC	FELSIC	TUFF		69.75
WMT-4-26		NAVDAT		A geochemical and strontium isotopic investigation of Laramide and younger igneous rocks in central Colorado, with emphasis on the petrogenesis of the Thirtynine Mile volcanic field	Thesis or dissertation; Doctoral; Monographic	Campbell, Steven Kent		38.6528	-106.055	1e-05	31.7	36.7	41.7	ICP	IGNEOUS	VOLCANIC	FELSIC	TUFF
WMT-4-26		NAVDAT		A geochemical and strontium isotopic investigation of Laramide and younger igneous rocks in central Colorado, with emphasis on the petrogenesis of the Thirtynine Mile volcanic field	Thesis or dissertation; Doctoral; Monographic	Campbell, Steven Kent		38.6528	-106.055	1e-05	31.7	36.7	41.7	LOI	IGNEOUS	VOLCANIC	FELSIC	TUFF																			3.82
WMT-4-26		NAVDAT		A geochemical and strontium isotopic investigation of Laramide and younger igneous rocks in central Colorado, with emphasis on the petrogenesis of the Thirtynine Mile volcanic field	Thesis or dissertation; Doctoral; Monographic	Campbell, Steven Kent		38.6528	-106.055	1e-05	31.7	36.7	41.7	GAMMA-RAY COUNTING	IGNEOUS	VOLCANIC	FELSIC	TUFF
WMT-5-27		NAVDAT		A geochemical and strontium isotopic investigation of Laramide and younger igneous rocks in central Colorado, with emphasis on the petrogenesis of the Thirtynine Mile volcanic field	Thesis or dissertation; Doctoral; Monographic	Campbell, Steven Kent		38.6543	-106.058	1e-05	32	37	42	XRF	IGNEOUS	VOLCANIC	FELSIC	TUFF			0.51										1.98				0.06
WMT-5-27		NAVDAT		A geochemical and strontium isotopic investigation of Laramide and younger igneous rocks in central Colorado, with emphasis on the petrogenesis of the Thirtynine Mile volcanic field	Thesis or dissertation; Doctoral; Monographic	Campbell, Steven Kent		38.6543	-106.058	1e-05	32	37	42	UNKNOWN	IGNEOUS	VOLCANIC	FELSIC	TUFF																												2	15	2
WMT-5-27		NAVDAT		A geochemical and strontium isotopic investigation of Laramide and younger igneous rocks in central Colorado, with emphasis on the petrogenesis of the Thirtynine Mile volcanic field	Thesis or dissertation; Doctoral; Monographic	Campbell, Steven Kent		38.6543	-106.058	1e-05	32	37	42	AAS	IGNEOUS	VOLCANIC	FELSIC	TUFF				16.99		2		0				0.45			3.57	5.66
WMT-5-27		NAVDAT		A geochemical and strontium isotopic investigation of Laramide and younger igneous rocks in central Colorado, with emphasis on the petrogenesis of the Thirtynine Mile volcanic field	Thesis or dissertation; Doctoral; Monographic	Campbell, Steven Kent		38.6543	-106.058	1e-05	32	37	42	UNKNOWN	IGNEOUS	VOLCANIC	FELSIC	TUFF											0.06
WMT-5-27		NAVDAT		A geochemical and strontium isotopic investigation of Laramide and younger igneous rocks in central Colorado, with emphasis on the petrogenesis of the Thirtynine Mile volcanic field	Thesis or dissertation; Doctoral; Monographic	Campbell, Steven Kent		38.6543	-106.058	1e-05	32	37	42	UV-VIS COLORIMETRY	IGNEOUS	VOLCANIC	FELSIC	TUFF		68.7
WMT-5-27		NAVDAT		A geochemical and strontium isotopic investigation of Laramide and younger igneous rocks in central Colorado, with emphasis on the petrogenesis of the Thirtynine Mile volcanic field	Thesis or dissertation; Doctoral; Monographic	Campbell, Steven Kent		38.6543	-106.058	1e-05	32	37	42	ICP	IGNEOUS	VOLCANIC	FELSIC	TUFF
WMT-5-27		NAVDAT		A geochemical and strontium isotopic investigation of Laramide and younger igneous rocks in central Colorado, with emphasis on the petrogenesis of the Thirtynine Mile volcanic field	Thesis or dissertation; Doctoral; Monographic	Campbell, Steven Kent		38.6543	-106.058	1e-05	32	37	42	LOI	IGNEOUS	VOLCANIC	FELSIC	TUFF																			3.57
WMT-5-27		NAVDAT		A geochemical and strontium isotopic investigation of Laramide and younger igneous rocks in central Colorado, with emphasis on the petrogenesis of the Thirtynine Mile volcanic field	Thesis or dissertation; Doctoral; Monographic	Campbell, Steven Kent		38.6543	-106.058	1e-05	32	37	42	GAMMA-RAY COUNTING	IGNEOUS	VOLCANIC	FELSIC	TUFF
WMT-6-36		NAVDAT		A geochemical and strontium isotopic investigation of Laramide and younger igneous rocks in central Colorado, with emphasis on the petrogenesis of the Thirtynine Mile volcanic field	Thesis or dissertation; Doctoral; Monographic	Campbell, Steven Kent		38.8411	-105.983	1e-05	32	37	42	XRF	IGNEOUS	VOLCANIC	FELSIC	TUFF			0.48										1.73				0.04
WMT-6-36		NAVDAT		A geochemical and strontium isotopic investigation of Laramide and younger igneous rocks in central Colorado, with emphasis on the petrogenesis of the Thirtynine Mile volcanic field	Thesis or dissertation; Doctoral; Monographic	Campbell, Steven Kent		38.8411	-105.983	1e-05	32	37	42	UNKNOWN	IGNEOUS	VOLCANIC	FELSIC	TUFF																												5	14	2
WMT-6-36		NAVDAT		A geochemical and strontium isotopic investigation of Laramide and younger igneous rocks in central Colorado, with emphasis on the petrogenesis of the Thirtynine Mile volcanic field	Thesis or dissertation; Doctoral; Monographic	Campbell, Steven Kent		38.8411	-105.983	1e-05	32	37	42	AAS	IGNEOUS	VOLCANIC	FELSIC	TUFF				15.29		2.03		0.19				0.4			3.65	5.98
WMT-6-36		NAVDAT		A geochemical and strontium isotopic investigation of Laramide and younger igneous rocks in central Colorado, with emphasis on the petrogenesis of the Thirtynine Mile volcanic field	Thesis or dissertation; Doctoral; Monographic	Campbell, Steven Kent		38.8411	-105.983	1e-05	32	37	42	UNKNOWN	IGNEOUS	VOLCANIC	FELSIC	TUFF											0.08
WMT-6-36		NAVDAT		A geochemical and strontium isotopic investigation of Laramide and younger igneous rocks in central Colorado, with emphasis on the petrogenesis of the Thirtynine Mile volcanic field	Thesis or dissertation; Doctoral; Monographic	Campbell, Steven Kent		38.8411	-105.983	1e-05	32	37	42	UV-VIS COLORIMETRY	IGNEOUS	VOLCANIC	FELSIC	TUFF		70.13
WMT-6-36		NAVDAT		A geochemical and strontium isotopic investigation of Laramide and younger igneous rocks in central Colorado, with emphasis on the petrogenesis of the Thirtynine Mile volcanic field	Thesis or dissertation; Doctoral; Monographic	Campbell, Steven Kent		38.8411	-105.983	1e-05	32	37	42	ICP	IGNEOUS	VOLCANIC	FELSIC	TUFF
WMT-6-36		NAVDAT		A geochemical and strontium isotopic investigation of Laramide and younger igneous rocks in central Colorado, with emphasis on the petrogenesis of the Thirtynine Mile volcanic field	Thesis or dissertation; Doctoral; Monographic	Campbell, Steven Kent		38.8411	-105.983	1e-05	32	37	42	LOI	IGNEOUS	VOLCANIC	FELSIC	TUFF																			3
WMT-6-36		NAVDAT		A geochemical and strontium isotopic investigation of Laramide and younger igneous rocks in central Colorado, with emphasis on the petrogenesis of the Thirtynine Mile volcanic field	Thesis or dissertation; Doctoral; Monographic	Campbell, Steven Kent		38.8411	-105.983	1e-05	32	37	42	GAMMA-RAY COUNTING	IGNEOUS	VOLCANIC	FELSIC	TUFF
WMT-7-67		NAVDAT		A geochemical and strontium isotopic investigation of Laramide and younger igneous rocks in central Colorado, with emphasis on the petrogenesis of the Thirtynine Mile volcanic field	Thesis or dissertation; Doctoral; Monographic	Campbell, Steven Kent		38.5504	-105.687	1e-05	32	37	42	XRF	IGNEOUS	VOLCANIC	FELSIC	TUFF			0.47										1.24				0.04
WMT-7-67		NAVDAT		A geochemical and strontium isotopic investigation of Laramide and younger igneous rocks in central Colorado, with emphasis on the petrogenesis of the Thirtynine Mile volcanic field	Thesis or dissertation; Doctoral; Monographic	Campbell, Steven Kent		38.5504	-105.687	1e-05	32	37	42	UNKNOWN	IGNEOUS	VOLCANIC	FELSIC	TUFF																												2	15	3
WMT-7-67		NAVDAT		A geochemical and strontium isotopic investigation of Laramide and younger igneous rocks in central Colorado, with emphasis on the petrogenesis of the Thirtynine Mile volcanic field	Thesis or dissertation; Doctoral; Monographic	Campbell, Steven Kent		38.5504	-105.687	1e-05	32	37	42	AAS	IGNEOUS	VOLCANIC	FELSIC	TUFF				14.94		1.76		0				0.27			3.96	5.77
WMT-7-67		NAVDAT		A geochemical and strontium isotopic investigation of Laramide and younger igneous rocks in central Colorado, with emphasis on the petrogenesis of the Thirtynine Mile volcanic field	Thesis or dissertation; Doctoral; Monographic	Campbell, Steven Kent		38.5504	-105.687	1e-05	32	37	42	UNKNOWN	IGNEOUS	VOLCANIC	FELSIC	TUFF											0.02
WMT-7-67		NAVDAT		A geochemical and strontium isotopic investigation of Laramide and younger igneous rocks in central Colorado, with emphasis on the petrogenesis of the Thirtynine Mile volcanic field	Thesis or dissertation; Doctoral; Monographic	Campbell, Steven Kent		38.5504	-105.687	1e-05	32	37	42	UV-VIS COLORIMETRY	IGNEOUS	VOLCANIC	FELSIC	TUFF		71.52
WMT-7-67		NAVDAT		A geochemical and strontium isotopic investigation of Laramide and younger igneous rocks in central Colorado, with emphasis on the petrogenesis of the Thirtynine Mile volcanic field	Thesis or dissertation; Doctoral; Monographic	Campbell, Steven Kent		38.5504	-105.687	1e-05	32	37	42	ICP	IGNEOUS	VOLCANIC	FELSIC	TUFF
WMT-7-67		NAVDAT		A geochemical and strontium isotopic investigation of Laramide and younger igneous rocks in central Colorado, with emphasis on the petrogenesis of the Thirtynine Mile volcanic field	Thesis or dissertation; Doctoral; Monographic	Campbell, Steven Kent		38.5504	-105.687	1e-05	32	37	42	LOI	IGNEOUS	VOLCANIC	FELSIC	TUFF																			0.9
WMT-7-67		NAVDAT		A geochemical and strontium isotopic investigation of Laramide and younger igneous rocks in central Colorado, with emphasis on the petrogenesis of the Thirtynine Mile volcanic field	Thesis or dissertation; Doctoral; Monographic	Campbell, Steven Kent		38.5504	-105.687	1e-05	32	37	42	GAMMA-RAY COUNTING	IGNEOUS	VOLCANIC	FELSIC	TUFF
WMT-8-76		NAVDAT		A geochemical and strontium isotopic investigation of Laramide and younger igneous rocks in central Colorado, with emphasis on the petrogenesis of the Thirtynine Mile volcanic field	Thesis or dissertation; Doctoral; Monographic	Campbell, Steven Kent		39.3649	-104.898	1e-05	32	37	42	XRF	IGNEOUS	VOLCANIC	FELSIC	TUFF			0.37										0.67				0.03
WMT-8-76		NAVDAT		A geochemical and strontium isotopic investigation of Laramide and younger igneous rocks in central Colorado, with emphasis on the petrogenesis of the Thirtynine Mile volcanic field	Thesis or dissertation; Doctoral; Monographic	Campbell, Steven Kent		39.3649	-104.898	1e-05	32	37	42	UNKNOWN	IGNEOUS	VOLCANIC	FELSIC	TUFF																												2	6	3
WMT-8-76		NAVDAT		A geochemical and strontium isotopic investigation of Laramide and younger igneous rocks in central Colorado, with emphasis on the petrogenesis of the Thirtynine Mile volcanic field	Thesis or dissertation; Doctoral; Monographic	Campbell, Steven Kent		39.3649	-104.898	1e-05	32	37	42	AAS	IGNEOUS	VOLCANIC	FELSIC	TUFF				13.54		1.14		0				0.14			3.42	5.72
WMT-8-76		NAVDAT		A geochemical and strontium isotopic investigation of Laramide and younger igneous rocks in central Colorado, with emphasis on the petrogenesis of the Thirtynine Mile volcanic field	Thesis or dissertation; Doctoral; Monographic	Campbell, Steven Kent		39.3649	-104.898	1e-05	32	37	42	UNKNOWN	IGNEOUS	VOLCANIC	FELSIC	TUFF											0.02
WMT-8-76		NAVDAT		A geochemical and strontium isotopic investigation of Laramide and younger igneous rocks in central Colorado, with emphasis on the petrogenesis of the Thirtynine Mile volcanic field	Thesis or dissertation; Doctoral; Monographic	Campbell, Steven Kent		39.3649	-104.898	1e-05	32	37	42	UV-VIS COLORIMETRY	IGNEOUS	VOLCANIC	FELSIC	TUFF		74.94
WMT-8-76		NAVDAT		A geochemical and strontium isotopic investigation of Laramide and younger igneous rocks in central Colorado, with emphasis on the petrogenesis of the Thirtynine Mile volcanic field	Thesis or dissertation; Doctoral; Monographic	Campbell, Steven Kent		39.3649	-104.898	1e-05	32	37	42	ICP	IGNEOUS	VOLCANIC	FELSIC	TUFF
WMT-8-76		NAVDAT		A geochemical and strontium isotopic investigation of Laramide and younger igneous rocks in central Colorado, with emphasis on the petrogenesis of the Thirtynine Mile volcanic field	Thesis or dissertation; Doctoral; Monographic	Campbell, Steven Kent		39.3649	-104.898	1e-05	32	37	42	LOI	IGNEOUS	VOLCANIC	FELSIC	TUFF																			1.13
WMT-8-76		NAVDAT		A geochemical and strontium isotopic investigation of Laramide and younger igneous rocks in central Colorado, with emphasis on the petrogenesis of the Thirtynine Mile volcanic field	Thesis or dissertation; Doctoral; Monographic	Campbell, Steven Kent		39.3649	-104.898	1e-05	32	37	42	GAMMA-RAY COUNTING	IGNEOUS	VOLCANIC	FELSIC	TUFF
WMT-9-77		NAVDAT		A geochemical and strontium isotopic investigation of Laramide and younger igneous rocks in central Colorado, with emphasis on the petrogenesis of the Thirtynine Mile volcanic field	Thesis or dissertation; Doctoral; Monographic	Campbell, Steven Kent		39.3382	-104.852	1e-05	31.7	36.7	41.7	XRF	IGNEOUS	VOLCANIC	FELSIC	TUFF			0.35										0.93				0.04
WMT-9-77		NAVDAT		A geochemical and strontium isotopic investigation of Laramide and younger igneous rocks in central Colorado, with emphasis on the petrogenesis of the Thirtynine Mile volcanic field	Thesis or dissertation; Doctoral; Monographic	Campbell, Steven Kent		39.3382	-104.852	1e-05	31.7	36.7	41.7	UNKNOWN	IGNEOUS	VOLCANIC	FELSIC	TUFF																												2	10	3
WMT-9-77		NAVDAT		A geochemical and strontium isotopic investigation of Laramide and younger igneous rocks in central Colorado, with emphasis on the petrogenesis of the Thirtynine Mile volcanic field	Thesis or dissertation; Doctoral; Monographic	Campbell, Steven Kent		39.3382	-104.852	1e-05	31.7	36.7	41.7	AAS	IGNEOUS	VOLCANIC	FELSIC	TUFF				15.35		1.68		0				0.29			2.28	6.43
WMT-9-77		NAVDAT		A geochemical and strontium isotopic investigation of Laramide and younger igneous rocks in central Colorado, with emphasis on the petrogenesis of the Thirtynine Mile volcanic field	Thesis or dissertation; Doctoral; Monographic	Campbell, Steven Kent		39.3382	-104.852	1e-05	31.7	36.7	41.7	UNKNOWN	IGNEOUS	VOLCANIC	FELSIC	TUFF											0.05
WMT-9-77		NAVDAT		A geochemical and strontium isotopic investigation of Laramide and younger igneous rocks in central Colorado, with emphasis on the petrogenesis of the Thirtynine Mile volcanic field	Thesis or dissertation; Doctoral; Monographic	Campbell, Steven Kent		39.3382	-104.852	1e-05	31.7	36.7	41.7	UV-VIS COLORIMETRY	IGNEOUS	VOLCANIC	FELSIC	TUFF		72.6
WMT-9-77		NAVDAT		A geochemical and strontium isotopic investigation of Laramide and younger igneous rocks in central Colorado, with emphasis on the petrogenesis of the Thirtynine Mile volcanic field	Thesis or dissertation; Doctoral; Monographic	Campbell, Steven Kent		39.3382	-104.852	1e-05	31.7	36.7	41.7	ICP	IGNEOUS	VOLCANIC	FELSIC	TUFF
WMT-9-77		NAVDAT		A geochemical and strontium isotopic investigation of Laramide and younger igneous rocks in central Colorado, with emphasis on the petrogenesis of the Thirtynine Mile volcanic field	Thesis or dissertation; Doctoral; Monographic	Campbell, Steven Kent		39.3382	-104.852	1e-05	31.7	36.7	41.7	LOI	IGNEOUS	VOLCANIC	FELSIC	TUFF																			4.78
WMT-9-77		NAVDAT		A geochemical and strontium isotopic investigation of Laramide and younger igneous rocks in central Colorado, with emphasis on the petrogenesis of the Thirtynine Mile volcanic field	Thesis or dissertation; Doctoral; Monographic	Campbell, Steven Kent		39.3382	-104.852	1e-05	31.7	36.7	41.7	GAMMA-RAY COUNTING	IGNEOUS	VOLCANIC	FELSIC	TUFF
WMT-10-80		NAVDAT		A geochemical and strontium isotopic investigation of Laramide and younger igneous rocks in central Colorado, with emphasis on the petrogenesis of the Thirtynine Mile volcanic field	Thesis or dissertation; Doctoral; Monographic	Campbell, Steven Kent		39.3396	-104.852	1e-05	32	37	42	XRF	IGNEOUS	VOLCANIC	FELSIC	TUFF			0.33										0.65				0.04
WMT-10-80		NAVDAT		A geochemical and strontium isotopic investigation of Laramide and younger igneous rocks in central Colorado, with emphasis on the petrogenesis of the Thirtynine Mile volcanic field	Thesis or dissertation; Doctoral; Monographic	Campbell, Steven Kent		39.3396	-104.852	1e-05	32	37	42	UNKNOWN	IGNEOUS	VOLCANIC	FELSIC	TUFF																												1	8	2
WMT-10-80		NAVDAT		A geochemical and strontium isotopic investigation of Laramide and younger igneous rocks in central Colorado, with emphasis on the petrogenesis of the Thirtynine Mile volcanic field	Thesis or dissertation; Doctoral; Monographic	Campbell, Steven Kent		39.3396	-104.852	1e-05	32	37	42	AAS	IGNEOUS	VOLCANIC	FELSIC	TUFF				13.26		1.22		0				0.12			3.63	5.38
WMT-10-80		NAVDAT		A geochemical and strontium isotopic investigation of Laramide and younger igneous rocks in central Colorado, with emphasis on the petrogenesis of the Thirtynine Mile volcanic field	Thesis or dissertation; Doctoral; Monographic	Campbell, Steven Kent		39.3396	-104.852	1e-05	32	37	42	UNKNOWN	IGNEOUS	VOLCANIC	FELSIC	TUFF											0.02
WMT-10-80		NAVDAT		A geochemical and strontium isotopic investigation of Laramide and younger igneous rocks in central Colorado, with emphasis on the petrogenesis of the Thirtynine Mile volcanic field	Thesis or dissertation; Doctoral; Monographic	Campbell, Steven Kent		39.3396	-104.852	1e-05	32	37	42	UV-VIS COLORIMETRY	IGNEOUS	VOLCANIC	FELSIC	TUFF		75.36
WMT-10-80		NAVDAT		A geochemical and strontium isotopic investigation of Laramide and younger igneous rocks in central Colorado, with emphasis on the petrogenesis of the Thirtynine Mile volcanic field	Thesis or dissertation; Doctoral; Monographic	Campbell, Steven Kent		39.3396	-104.852	1e-05	32	37	42	ICP	IGNEOUS	VOLCANIC	FELSIC	TUFF
WMT-10-80		NAVDAT		A geochemical and strontium isotopic investigation of Laramide and younger igneous rocks in central Colorado, with emphasis on the petrogenesis of the Thirtynine Mile volcanic field	Thesis or dissertation; Doctoral; Monographic	Campbell, Steven Kent		39.3396	-104.852	1e-05	32	37	42	LOI	IGNEOUS	VOLCANIC	FELSIC	TUFF																			1.2
WMT-10-80		NAVDAT		A geochemical and strontium isotopic investigation of Laramide and younger igneous rocks in central Colorado, with emphasis on the petrogenesis of the Thirtynine Mile volcanic field	Thesis or dissertation; Doctoral; Monographic	Campbell, Steven Kent		39.3396	-104.852	1e-05	32	37	42	GAMMA-RAY COUNTING	IGNEOUS	VOLCANIC	FELSIC	TUFF
WMT-11-103		NAVDAT		A geochemical and strontium isotopic investigation of Laramide and younger igneous rocks in central Colorado, with emphasis on the petrogenesis of the Thirtynine Mile volcanic field	Thesis or dissertation; Doctoral; Monographic	Campbell, Steven Kent		38.4629	-105.812	1e-05	32	37	42	XRF	IGNEOUS	VOLCANIC	FELSIC	TUFF			0.51										1.91				0.07
WMT-11-103		NAVDAT		A geochemical and strontium isotopic investigation of Laramide and younger igneous rocks in central Colorado, with emphasis on the petrogenesis of the Thirtynine Mile volcanic field	Thesis or dissertation; Doctoral; Monographic	Campbell, Steven Kent		38.4629	-105.812	1e-05	32	37	42	UNKNOWN	IGNEOUS	VOLCANIC	FELSIC	TUFF																												8	10	2
WMT-11-103		NAVDAT		A geochemical and strontium isotopic investigation of Laramide and younger igneous rocks in central Colorado, with emphasis on the petrogenesis of the Thirtynine Mile volcanic field	Thesis or dissertation; Doctoral; Monographic	Campbell, Steven Kent		38.4629	-105.812	1e-05	32	37	42	AAS	IGNEOUS	VOLCANIC	FELSIC	TUFF				16.34		1.01		0				0.36			4.09	5.91
WMT-11-103		NAVDAT		A geochemical and strontium isotopic investigation of Laramide and younger igneous rocks in central Colorado, with emphasis on the petrogenesis of the Thirtynine Mile volcanic field	Thesis or dissertation; Doctoral; Monographic	Campbell, Steven Kent		38.4629	-105.812	1e-05	32	37	42	UNKNOWN	IGNEOUS	VOLCANIC	FELSIC	TUFF											0.03
WMT-11-103		NAVDAT		A geochemical and strontium isotopic investigation of Laramide and younger igneous rocks in central Colorado, with emphasis on the petrogenesis of the Thirtynine Mile volcanic field	Thesis or dissertation; Doctoral; Monographic	Campbell, Steven Kent		38.4629	-105.812	1e-05	32	37	42	UV-VIS COLORIMETRY	IGNEOUS	VOLCANIC	FELSIC	TUFF		69.77
WMT-11-103		NAVDAT		A geochemical and strontium isotopic investigation of Laramide and younger igneous rocks in central Colorado, with emphasis on the petrogenesis of the Thirtynine Mile volcanic field	Thesis or dissertation; Doctoral; Monographic	Campbell, Steven Kent		38.4629	-105.812	1e-05	32	37	42	ICP	IGNEOUS	VOLCANIC	FELSIC	TUFF
WMT-11-103		NAVDAT		A geochemical and strontium isotopic investigation of Laramide and younger igneous rocks in central Colorado, with emphasis on the petrogenesis of the Thirtynine Mile volcanic field	Thesis or dissertation; Doctoral; Monographic	Campbell, Steven Kent		38.4629	-105.812	1e-05	32	37	42	LOI	IGNEOUS	VOLCANIC	FELSIC	TUFF																			0.82
WMT-11-103		NAVDAT		A geochemical and strontium isotopic investigation of Laramide and younger igneous rocks in central Colorado, with emphasis on the petrogenesis of the Thirtynine Mile volcanic field	Thesis or dissertation; Doctoral; Monographic	Campbell, Steven Kent		38.4629	-105.812	1e-05	32	37	42	GAMMA-RAY COUNTING	IGNEOUS	VOLCANIC	FELSIC	TUFF
WMT-12-119		NAVDAT		A geochemical and strontium isotopic investigation of Laramide and younger igneous rocks in central Colorado, with emphasis on the petrogenesis of the Thirtynine Mile volcanic field	Thesis or dissertation; Doctoral; Monographic	Campbell, Steven Kent		38.8232	-105.985	1e-05	31.7	36.7	41.7	XRF	IGNEOUS	VOLCANIC	FELSIC	TUFF			0.44										1.11				0.04
WMT-12-119		NAVDAT		A geochemical and strontium isotopic investigation of Laramide and younger igneous rocks in central Colorado, with emphasis on the petrogenesis of the Thirtynine Mile volcanic field	Thesis or dissertation; Doctoral; Monographic	Campbell, Steven Kent		38.8232	-105.985	1e-05	31.7	36.7	41.7	UNKNOWN	IGNEOUS	VOLCANIC	FELSIC	TUFF																												4	9	4
WMT-12-119		NAVDAT		A geochemical and strontium isotopic investigation of Laramide and younger igneous rocks in central Colorado, with emphasis on the petrogenesis of the Thirtynine Mile volcanic field	Thesis or dissertation; Doctoral; Monographic	Campbell, Steven Kent		38.8232	-105.985	1e-05	31.7	36.7	41.7	AAS	IGNEOUS	VOLCANIC	FELSIC	TUFF				15.11		1.93		0.01				0.25			3.92	5.69
WMT-12-119		NAVDAT		A geochemical and strontium isotopic investigation of Laramide and younger igneous rocks in central Colorado, with emphasis on the petrogenesis of the Thirtynine Mile volcanic field	Thesis or dissertation; Doctoral; Monographic	Campbell, Steven Kent		38.8232	-105.985	1e-05	31.7	36.7	41.7	UNKNOWN	IGNEOUS	VOLCANIC	FELSIC	TUFF											0.04
WMT-12-119		NAVDAT		A geochemical and strontium isotopic investigation of Laramide and younger igneous rocks in central Colorado, with emphasis on the petrogenesis of the Thirtynine Mile volcanic field	Thesis or dissertation; Doctoral; Monographic	Campbell, Steven Kent		38.8232	-105.985	1e-05	31.7	36.7	41.7	UV-VIS COLORIMETRY	IGNEOUS	VOLCANIC	FELSIC	TUFF		71.44
WMT-12-119		NAVDAT		A geochemical and strontium isotopic investigation of Laramide and younger igneous rocks in central Colorado, with emphasis on the petrogenesis of the Thirtynine Mile volcanic field	Thesis or dissertation; Doctoral; Monographic	Campbell, Steven Kent		38.8232	-105.985	1e-05	31.7	36.7	41.7	ICP	IGNEOUS	VOLCANIC	FELSIC	TUFF
WMT-12-119		NAVDAT		A geochemical and strontium isotopic investigation of Laramide and younger igneous rocks in central Colorado, with emphasis on the petrogenesis of the Thirtynine Mile volcanic field	Thesis or dissertation; Doctoral; Monographic	Campbell, Steven Kent		38.8232	-105.985	1e-05	31.7	36.7	41.7	LOI	IGNEOUS	VOLCANIC	FELSIC	TUFF																			0.71
WMT-12-119		NAVDAT		A geochemical and strontium isotopic investigation of Laramide and younger igneous rocks in central Colorado, with emphasis on the petrogenesis of the Thirtynine Mile volcanic field	Thesis or dissertation; Doctoral; Monographic	Campbell, Steven Kent		38.8232	-105.985	1e-05	31.7	36.7	41.7	GAMMA-RAY COUNTING	IGNEOUS	VOLCANIC	FELSIC	TUFF
LR88012		NAVDAT		Crustal and magmatic evolution in a large multicyclic caldera complex; isotopic evidence from the central San Juan volcanic field.	Journal of Volcanology and Geothermal Research. 67; 1-3, Pages 1-28. 1995. .	Riciputi-Lee-R; Johnson-Clark-M; Sawyer-David-A; Lipman-Peter-W		38.0236	-106.986	0.0001	26	26.1	30	MS-ID	IGNEOUS	VOLCANIC	FELSIC	TUFF	PUMICE
LR88012		NAVDAT		Crustal and magmatic evolution in a large multicyclic caldera complex; isotopic evidence from the central San Juan volcanic field.	Journal of Volcanology and Geothermal Research. 67; 1-3, Pages 1-28. 1995. .	Riciputi-Lee-R; Johnson-Clark-M; Sawyer-David-A; Lipman-Peter-W		38.0236	-106.986	0.0001	26	26.1	30	MS	IGNEOUS	VOLCANIC	FELSIC	TUFF
LR89013		NAVDAT		Crustal and magmatic evolution in a large multicyclic caldera complex; isotopic evidence from the central San Juan volcanic field.	Journal of Volcanology and Geothermal Research. 67; 1-3, Pages 1-28. 1995. .	Riciputi-Lee-R; Johnson-Clark-M; Sawyer-David-A; Lipman-Peter-W		38.0994	-106.983	0.0001	26	26.1	30	MS-ID	IGNEOUS	VOLCANIC	FELSIC	TUFF	PUMICE
LR89013		NAVDAT		Crustal and magmatic evolution in a large multicyclic caldera complex; isotopic evidence from the central San Juan volcanic field.	Journal of Volcanology and Geothermal Research. 67; 1-3, Pages 1-28. 1995. .	Riciputi-Lee-R; Johnson-Clark-M; Sawyer-David-A; Lipman-Peter-W		38.0994	-106.983	0.0001	26	26.1	30	MS	IGNEOUS	VOLCANIC	FELSIC	TUFF
LR89014		NAVDAT		Crustal and magmatic evolution in a large multicyclic caldera complex; isotopic evidence from the central San Juan volcanic field.	Journal of Volcanology and Geothermal Research. 67; 1-3, Pages 1-28. 1995. .	Riciputi-Lee-R; Johnson-Clark-M; Sawyer-David-A; Lipman-Peter-W		38.0983	-106.985	0.0001	26	26.15	30	MS-ID	IGNEOUS	VOLCANIC	FELSIC	TUFF	PUMICE
LR89014		NAVDAT		Crustal and magmatic evolution in a large multicyclic caldera complex; isotopic evidence from the central San Juan volcanic field.	Journal of Volcanology and Geothermal Research. 67; 1-3, Pages 1-28. 1995. .	Riciputi-Lee-R; Johnson-Clark-M; Sawyer-David-A; Lipman-Peter-W		38.0983	-106.985	0.0001	26	26.15	30	MS	IGNEOUS	VOLCANIC	FELSIC	TUFF
LR89006		NAVDAT		Crustal and magmatic evolution in a large multicyclic caldera complex; isotopic evidence from the central San Juan volcanic field.	Journal of Volcanology and Geothermal Research. 67; 1-3, Pages 1-28. 1995. .	Riciputi-Lee-R; Johnson-Clark-M; Sawyer-David-A; Lipman-Peter-W		37.9156	-106.921	0.0001	26	26.4	30	MS	IGNEOUS	VOLCANIC	FELSIC	TUFF
LR89006		NAVDAT		Crustal and magmatic evolution in a large multicyclic caldera complex; isotopic evidence from the central San Juan volcanic field.	Journal of Volcanology and Geothermal Research. 67; 1-3, Pages 1-28. 1995. .	Riciputi-Lee-R; Johnson-Clark-M; Sawyer-David-A; Lipman-Peter-W		37.9156	-106.921	0.0001	26	26.4	30	MS-ID	IGNEOUS	VOLCANIC	FELSIC	TUFF	PUMICE
LR89007		NAVDAT		Crustal and magmatic evolution in a large multicyclic caldera complex; isotopic evidence from the central San Juan volcanic field.	Journal of Volcanology and Geothermal Research. 67; 1-3, Pages 1-28. 1995. .	Riciputi-Lee-R; Johnson-Clark-M; Sawyer-David-A; Lipman-Peter-W		37.9161	-106.921	0.0001	26	26.4	30	MS-ID	IGNEOUS	VOLCANIC	FELSIC	TUFF	PUMICE
LR89007		NAVDAT		Crustal and magmatic evolution in a large multicyclic caldera complex; isotopic evidence from the central San Juan volcanic field.	Journal of Volcanology and Geothermal Research. 67; 1-3, Pages 1-28. 1995. .	Riciputi-Lee-R; Johnson-Clark-M; Sawyer-David-A; Lipman-Peter-W		37.9161	-106.921	0.0001	26	26.4	30	MS	IGNEOUS	VOLCANIC	FELSIC	TUFF
LR89007		NAVDAT		Crustal and magmatic evolution in a large multicyclic caldera complex; isotopic evidence from the central San Juan volcanic field.	Journal of Volcanology and Geothermal Research. 67; 1-3, Pages 1-28. 1995. .	Riciputi-Lee-R; Johnson-Clark-M; Sawyer-David-A; Lipman-Peter-W		37.9161	-106.921	0.0001	26	26.4	30	MS	IGNEOUS	VOLCANIC	FELSIC	TUFF
DS88029		NAVDAT		Crustal and magmatic evolution in a large multicyclic caldera complex; isotopic evidence from the central San Juan volcanic field.	Journal of Volcanology and Geothermal Research. 67; 1-3, Pages 1-28. 1995. .	Riciputi-Lee-R; Johnson-Clark-M; Sawyer-David-A; Lipman-Peter-W		38.0156	-106.894	0.0001	26	26.4	30	MS-ID	IGNEOUS	VOLCANIC	FELSIC	TUFF	PUMICE
DS88029		NAVDAT		Crustal and magmatic evolution in a large multicyclic caldera complex; isotopic evidence from the central San Juan volcanic field.	Journal of Volcanology and Geothermal Research. 67; 1-3, Pages 1-28. 1995. .	Riciputi-Lee-R; Johnson-Clark-M; Sawyer-David-A; Lipman-Peter-W		38.0156	-106.894	0.0001	26	26.4	30	MS	IGNEOUS	VOLCANIC	FELSIC	TUFF
LR88580		NAVDAT		Crustal and magmatic evolution in a large multicyclic caldera complex; isotopic evidence from the central San Juan volcanic field.	Journal of Volcanology and Geothermal Research. 67; 1-3, Pages 1-28. 1995. .	Riciputi-Lee-R; Johnson-Clark-M; Sawyer-David-A; Lipman-Peter-W		37.5756	-106.672	0.0001	26	26.9	30	MS	IGNEOUS	VOLCANIC	FELSIC	TUFF
LR88650		NAVDAT		Crustal and magmatic evolution in a large multicyclic caldera complex; isotopic evidence from the central San Juan volcanic field.	Journal of Volcanology and Geothermal Research. 67; 1-3, Pages 1-28. 1995. .	Riciputi-Lee-R; Johnson-Clark-M; Sawyer-David-A; Lipman-Peter-W		37.7861	-106.982	0.0001	26	26.9	30	MS-ID	IGNEOUS	VOLCANIC	FELSIC	TUFF
LR88580		NAVDAT		Crustal and magmatic evolution in a large multicyclic caldera complex; isotopic evidence from the central San Juan volcanic field.	Journal of Volcanology and Geothermal Research. 67; 1-3, Pages 1-28. 1995. .	Riciputi-Lee-R; Johnson-Clark-M; Sawyer-David-A; Lipman-Peter-W		37.5756	-106.672	0.0001	26	26.9	30	MS-ID	IGNEOUS	VOLCANIC	FELSIC	TUFF	PUMICE
LR88665		NAVDAT		Crustal and magmatic evolution in a large multicyclic caldera complex; isotopic evidence from the central San Juan volcanic field.	Journal of Volcanology and Geothermal Research. 67; 1-3, Pages 1-28. 1995. .	Riciputi-Lee-R; Johnson-Clark-M; Sawyer-David-A; Lipman-Peter-W		37.6147	-107.335	0.0001	26	27.4	30	MS-ID	IGNEOUS	VOLCANIC	FELSIC	TUFF	PUMICE
LR88665		NAVDAT		Crustal and magmatic evolution in a large multicyclic caldera complex; isotopic evidence from the central San Juan volcanic field.	Journal of Volcanology and Geothermal Research. 67; 1-3, Pages 1-28. 1995. .	Riciputi-Lee-R; Johnson-Clark-M; Sawyer-David-A; Lipman-Peter-W		37.6147	-107.335	0.0001	26	27.4	30	MS	IGNEOUS	VOLCANIC	FELSIC	TUFF
LR88588		NAVDAT		Crustal and magmatic evolution in a large multicyclic caldera complex; isotopic evidence from the central San Juan volcanic field.	Journal of Volcanology and Geothermal Research. 67; 1-3, Pages 1-28. 1995. .	Riciputi-Lee-R; Johnson-Clark-M; Sawyer-David-A; Lipman-Peter-W		37.5603	-106.685	0.0001	26	27.4	30	MS-ID	IGNEOUS	VOLCANIC	FELSIC	TUFF	PUMICE
LR88588		NAVDAT		Crustal and magmatic evolution in a large multicyclic caldera complex; isotopic evidence from the central San Juan volcanic field.	Journal of Volcanology and Geothermal Research. 67; 1-3, Pages 1-28. 1995. .	Riciputi-Lee-R; Johnson-Clark-M; Sawyer-David-A; Lipman-Peter-W		37.5603	-106.685	0.0001	26	27.4	30	MS	IGNEOUS	VOLCANIC	FELSIC	TUFF
LR9010D		NAVDAT		Crustal and magmatic evolution in a large multicyclic caldera complex; isotopic evidence from the central San Juan volcanic field.	Journal of Volcanology and Geothermal Research. 67; 1-3, Pages 1-28. 1995. .	Riciputi-Lee-R; Johnson-Clark-M; Sawyer-David-A; Lipman-Peter-W		37.6147	-107.035	0.0001	26	27.4	30	MS-ID	IGNEOUS	VOLCANIC	FELSIC	TUFF	PUMICE
LR9010D		NAVDAT		Crustal and magmatic evolution in a large multicyclic caldera complex; isotopic evidence from the central San Juan volcanic field.	Journal of Volcanology and Geothermal Research. 67; 1-3, Pages 1-28. 1995. .	Riciputi-Lee-R; Johnson-Clark-M; Sawyer-David-A; Lipman-Peter-W		37.6147	-107.035	0.0001	26	27.4	30	MS	IGNEOUS	VOLCANIC	FELSIC	TUFF
DS89032		NAVDAT		Crustal and magmatic evolution in a large multicyclic caldera complex; isotopic evidence from the central San Juan volcanic field.	Journal of Volcanology and Geothermal Research. 67; 1-3, Pages 1-28. 1995. .	Riciputi-Lee-R; Johnson-Clark-M; Sawyer-David-A; Lipman-Peter-W		37.7	-107	0.1	26	27.8	30	MS	IGNEOUS	VOLCANIC	FELSIC	TUFF
DS89032		NAVDAT		Crustal and magmatic evolution in a large multicyclic caldera complex; isotopic evidence from the central San Juan volcanic field.	Journal of Volcanology and Geothermal Research. 67; 1-3, Pages 1-28. 1995. .	Riciputi-Lee-R; Johnson-Clark-M; Sawyer-David-A; Lipman-Peter-W		37.7	-107	0.1	26	27.8	30	MS	IGNEOUS	VOLCANIC	FELSIC	TUFF
DS89032		NAVDAT		Crustal and magmatic evolution in a large multicyclic caldera complex; isotopic evidence from the central San Juan volcanic field.	Journal of Volcanology and Geothermal Research. 67; 1-3, Pages 1-28. 1995. .	Riciputi-Lee-R; Johnson-Clark-M; Sawyer-David-A; Lipman-Peter-W		37.7	-107	0.1	26	27.8	30	MS-ID	IGNEOUS	VOLCANIC	FELSIC	TUFF	PUMICE
LR89016		NAVDAT		Crustal and magmatic evolution in a large multicyclic caldera complex; isotopic evidence from the central San Juan volcanic field.	Journal of Volcanology and Geothermal Research. 67; 1-3, Pages 1-28. 1995. .	Riciputi-Lee-R; Johnson-Clark-M; Sawyer-David-A; Lipman-Peter-W		38.2672	-107.178	0.0001	26	27.8	30	MS-ID	IGNEOUS	VOLCANIC	FELSIC	TUFF	PUMICE
LR89016		NAVDAT		Crustal and magmatic evolution in a large multicyclic caldera complex; isotopic evidence from the central San Juan volcanic field.	Journal of Volcanology and Geothermal Research. 67; 1-3, Pages 1-28. 1995. .	Riciputi-Lee-R; Johnson-Clark-M; Sawyer-David-A; Lipman-Peter-W		38.2672	-107.178	0.0001	26	27.8	30	MS	IGNEOUS	VOLCANIC	FELSIC	TUFF
LR89016		NAVDAT		Crustal and magmatic evolution in a large multicyclic caldera complex; isotopic evidence from the central San Juan volcanic field.	Journal of Volcanology and Geothermal Research. 67; 1-3, Pages 1-28. 1995. .	Riciputi-Lee-R; Johnson-Clark-M; Sawyer-David-A; Lipman-Peter-W		38.2672	-107.178	0.0001	26	27.8	30	MS	IGNEOUS	VOLCANIC	FELSIC	TUFF
LR89006		NAVDAT		Crustal and magmatic evolution in a large multicyclic caldera complex; isotopic evidence from the central San Juan volcanic field.	Journal of Volcanology and Geothermal Research. 67; 1-3, Pages 1-28. 1995. .	Riciputi-Lee-R; Johnson-Clark-M; Sawyer-David-A; Lipman-Peter-W		37.9156	-106.921	0.0001	26	28	30	MS	IGNEOUS	VOLCANIC	FELSIC	TUFF
TC89-33b		NAVDAT		Fallout tuffs of Trapper Creek, Idaho; a record of Miocene explosivevolcanism in the Snake River plain volcanic province	Geological Society of America Bulletin, vol.107, no.12, pp.1484-1506,Dec 1995	Perkins, Michael E; Nash, William P; Brown, Francis H; Fleck, RobertJ		42.15	-114.25	1	8.6	11.25	13.9	XRF	IGNEOUS	VOLCANIC	FELSIC	TUFF																											190
TC89-33b		NAVDAT		Fallout tuffs of Trapper Creek, Idaho; a record of Miocene explosivevolcanism in the Snake River plain volcanic province	Geological Society of America Bulletin, vol.107, no.12, pp.1484-1506,Dec 1995	Perkins, Michael E; Nash, William P; Brown, Francis H; Fleck, RobertJ		42.15	-114.25	1	8.6	11.25	13.9	EPMA	IGNEOUS	VOLCANIC	FELSIC	TUFF		72.9	0.19	11.4			2.06				0.03	0.03	0.62		2.4	5.5		0.02		5
tc90-17		NAVDAT		Fallout tuffs of Trapper Creek, Idaho; a record of Miocene explosivevolcanism in the Snake River plain volcanic province	Geological Society of America Bulletin, vol.107, no.12, pp.1484-1506,Dec 1995	Perkins, Michael E; Nash, William P; Brown, Francis H; Fleck, RobertJ		42.15	-114.25	1	8.6	11.25	13.9	XRF	IGNEOUS	VOLCANIC	FELSIC	TUFF																											215
tc90-17		NAVDAT		Fallout tuffs of Trapper Creek, Idaho; a record of Miocene explosivevolcanism in the Snake River plain volcanic province	Geological Society of America Bulletin, vol.107, no.12, pp.1484-1506,Dec 1995	Perkins, Michael E; Nash, William P; Brown, Francis H; Fleck, RobertJ		42.15	-114.25	1	8.6	11.25	13.9	EPMA	IGNEOUS	VOLCANIC	FELSIC	TUFF		72.6	0.32	11.6			2.33				0.029	0.123	0.8		2.5	5.7		0.1		5
tc89-33b		NAVDAT		Fallout tuffs of Trapper Creek, Idaho; a record of Miocene explosivevolcanism in the Snake River plain volcanic province	Geological Society of America Bulletin, vol.107, no.12, pp.1484-1506,Dec 1995	Perkins, Michael E; Nash, William P; Brown, Francis H; Fleck, RobertJ		42.15	-114.25	1	8.6	11.25	13.9	XRF	IGNEOUS	VOLCANIC	FELSIC	TUFF																											180
tc89-33b		NAVDAT		Fallout tuffs of Trapper Creek, Idaho; a record of Miocene explosivevolcanism in the Snake River plain volcanic province	Geological Society of America Bulletin, vol.107, no.12, pp.1484-1506,Dec 1995	Perkins, Michael E; Nash, William P; Brown, Francis H; Fleck, RobertJ		42.15	-114.25	1	8.6	11.25	13.9	EPMA	IGNEOUS	VOLCANIC	FELSIC	TUFF		72.9	0.19	11.4			2.06				0.033	0.027	0.63		2.4	5.5				5
BBG-234		NAVDAT		Geologic map of the Lakecreek Quadrangle, Jackson County, Oregon.	Geological Map Series (Portland). 1994.	Hladky-Frank-R		42.4532	-122.562	0.001	23	23	24	XRF	IGNEOUS	VOLCANIC	INTERMEDIATE	TUFF		63.02	1.02	18.38					5.64		0.1	1.63	4.98		3.47	1.55	0.22		5.7
194M		NAVDAT		Oxygen isotope analyses of 166 rock samples from Medicine Lake Volcano, California.	Open-File Report - U. S. Geological Survey. 1996.	Adami, L. H.; Hildreth, W. H.; Donnelly-Nolan, J. M.		41.5	-121.7	0.0017	0.01	0.83	1.64	XRF	IGNEOUS	VOLCANIC	INTERMEDIATE	TUFF		63.6
900M		NAVDAT		Oxygen isotope analyses of 166 rock samples from Medicine Lake Volcano, California.	Open-File Report - U. S. Geological Survey. 1996.	Adami, L. H.; Hildreth, W. H.; Donnelly-Nolan, J. M.		41.5	-121.7	0.0017	0.01	0.83	1.64	XRF	IGNEOUS	VOLCANIC	INTERMEDIATE	TUFF		65.5
1650M-A		NAVDAT		Oxygen isotope analyses of 166 rock samples from Medicine Lake Volcano, California.	Open-File Report - U. S. Geological Survey. 1996.	Adami, L. H.; Hildreth, W. H.; Donnelly-Nolan, J. M.		41.7	-121.6	0.0017	0.01	0.83	1.64	XRF	IGNEOUS	VOLCANIC	INTERMEDIATE	TUFF		64.9
1650M-B		NAVDAT		Oxygen isotope analyses of 166 rock samples from Medicine Lake Volcano, California.	Open-File Report - U. S. Geological Survey. 1996.	Adami, L. H.; Hildreth, W. H.; Donnelly-Nolan, J. M.		41.7	-121.6	0.0017	0.01	0.83	1.64	XRF	IGNEOUS	VOLCANIC	INTERMEDIATE	TUFF		64.2
1896M		NAVDAT		Oxygen isotope analyses of 166 rock samples from Medicine Lake Volcano, California.	Open-File Report - U. S. Geological Survey. 1996.	Adami, L. H.; Hildreth, W. H.; Donnelly-Nolan, J. M.		41.6	-121.5	0.0017	0	0	0.005	XRF	IGNEOUS	VOLCANIC	INTERMEDIATE	TUFF		61.3
H96-31		NAVDAT		Geology of the Mount Blitzen Quadrangle, Nevada.	Map - Nevada Bureau of Mines and Geology. 1998.	Henry-Christopher-D; Boden-David-R		41.2178	-116.25	0.01	39.74	39.84	39.94	XRF	IGNEOUS	VOLCANIC	FELSIC	TUFF		62.87	0.81	17.38				4.16			0.09	2.33	5.14		3.51	3.42	0.31											8		5
H96-32		NAVDAT		Geology of the Mount Blitzen Quadrangle, Nevada.	Map - Nevada Bureau of Mines and Geology. 1998.	Henry-Christopher-D; Boden-David-R		41.2178	-116.25	0.01	39.74	39.84	39.94	XRF	IGNEOUS	VOLCANIC	FELSIC	TUFF		63.76	0.81	18.13				3.35			0.05	1.49	4.82		3.9	3.39	0.3											10		10
DB-27-RC		NAVDAT		Geology of the Mount Blitzen Quadrangle, Nevada.	Map - Nevada Bureau of Mines and Geology. 1998.	Henry-Christopher-D; Boden-David-R		41.3342	-116.35	0.01	39.74	39.84	39.94	XRF	IGNEOUS	VOLCANIC	FELSIC	TUFF		67.5	0.47	16.97				2.4			0.05	0.7	3.18		4.06	4.56	0.11											8		2
DB-28-RC		NAVDAT		Geology of the Mount Blitzen Quadrangle, Nevada.	Map - Nevada Bureau of Mines and Geology. 1998.	Henry-Christopher-D; Boden-David-R		41.3353	-116.351	0.01	35.892	39.88	43.868	XRF	IGNEOUS	VOLCANIC	FELSIC	TUFF		65.43	0.59	17.58				3.9			0.13	1.22	3.23		4.5	3.24	0.17											7		1
H96-80		NAVDAT		Geology of the Mount Blitzen Quadrangle, Nevada.	Map - Nevada Bureau of Mines and Geology. 1998.	Henry-Christopher-D; Boden-David-R		41.4014	-116.335	0.01	35.703	39.67	43.637	XRF	IGNEOUS	VOLCANIC	FELSIC	TUFF		73.08	0.21	14.48				1.8			0.02	0.63	1.38		2.97	5.38	0.06											9		6
178T		NAVDAT		Geologic map of the Hart Peak Quadrangle, California and Nevada.	Open-File Report - U. S. Geological Survey, Report: OF 98-0470, 12 pp., 1 sheet, 1998	Nielson, Jane E; Turner, Ryan D		35.3203	-115.064	0.001	16.65	18.5	20.35	SPEC	IGNEOUS	VOLCANIC	FELSIC	TUFF		74.6	0.24	12.7		1.27					0.05	0.22	0.43		2.66	5.27	0.05				0.27	0.89
141aT		NAVDAT		Geologic map of the Hart Peak Quadrangle, California and Nevada.	Open-File Report - U. S. Geological Survey, Report: OF 98-0470, 12 pp., 1 sheet, 1998	Nielson, Jane E; Turner, Ryan D		35.3125	-115.062	0.05	1.8	33.4	65	SPEC	IGNEOUS	VOLCANIC	FELSIC	TUFF		73.6	0.07	12.1		0.49		0.2			0.04	0.1	0.56		2.44	5.86	0.05				0.3	3.59
143aT		NAVDAT		Geologic map of the Hart Peak Quadrangle, California and Nevada.	Open-File Report - U. S. Geological Survey, Report: OF 98-0470, 12 pp., 1 sheet, 1998	Nielson, Jane E; Turner, Ryan D		35.3125	-115.062	0.05	1.8	33.4	65	SPEC	IGNEOUS	VOLCANIC	FELSIC	TUFF		73.8	0.06	11.7		0.41					0.13	0.28	1.61		1.97	6.47	0.05				0.47	0.79
143bT		NAVDAT		Geologic map of the Hart Peak Quadrangle, California and Nevada.	Open-File Report - U. S. Geological Survey, Report: OF 98-0470, 12 pp., 1 sheet, 1998	Nielson, Jane E; Turner, Ryan D		35.3125	-115.062	0.05	1.8	33.4	65	SPEC	IGNEOUS	VOLCANIC	FELSIC	TUFF		76.5	0.05	10.3		0.42		0.13			0.02	0.37	1.65		0.19	6.33	0.05				0.61	1.15
159T		NAVDAT		Geologic map of the Hart Peak Quadrangle, California and Nevada.	Open-File Report - U. S. Geological Survey, Report: OF 98-0470, 12 pp., 1 sheet, 1998	Nielson, Jane E; Turner, Ryan D		35.3125	-115.062	0.05	1.8	33.4	65	SPEC	IGNEOUS	VOLCANIC	FELSIC	TUFF		78	0.06	11.2		0.5		0.16			0.02	0.33	0.57		0.44	5.28	0.05				0.98	1.51
J8510		NAVDAT		Geologic map of the Hart Peak Quadrangle, California and Nevada.	Open-File Report - U. S. Geological Survey, Report: OF 98-0470, 12 pp., 1 sheet, 1998	Nielson, Jane E; Turner, Ryan D		35.3125	-114.938	0.05	16.785	18.65	20.515	SPEC	IGNEOUS	VOLCANIC	FELSIC	TUFF		73.8	0.21	11		0.98		0.1			0.05	0.6	1.79		3.08	4.63	0.1				0.68	0.61
J861		NAVDAT		Geologic map of the Hart Peak Quadrangle, California and Nevada.	Open-File Report - U. S. Geological Survey, Report: OF 98-0470, 12 pp., 1 sheet, 1998	Nielson, Jane E; Turner, Ryan D		35.3125	-114.938	0.05	7.2	8	8.8	SPEC	IGNEOUS	VOLCANIC	FELSIC	TUFF		65.6	0.17	14.2		1.35		0.18			0.09	1.32	1.57		3.14	3.41	0.06				3.64	4.42
482		NAVDAT		In: Proterozoic magmatism of the Rocky Mountains and environs (Part I).	Rocky Mountain Geology. 34; 2, Pages 245-262. 1999.	Barnes-Melanie; Rohs-C-Renee; Anthony-Elizabeth-Y; Van-Schmus-W-Randy; Denison-Rodger-E		35.5751	-102.207	0.04	1370	1385	1400	ICPMS	IGNEOUS	VOLCANIC	FELSIC	TUFF		69.08	0.23	11.92		9.08					0.1	0.4	0.84		3.19	4.22	0.05											39		192
505		NAVDAT		In: Proterozoic magmatism of the Rocky Mountains and environs (Part I).	Rocky Mountain Geology. 34; 2, Pages 245-262. 1999.	Barnes-Melanie; Rohs-C-Renee; Anthony-Elizabeth-Y; Van-Schmus-W-Randy; Denison-Rodger-E		36.2125	-102.277	0.04	1370	1385	1400	ICPMS	IGNEOUS	VOLCANIC	FELSIC	TUFF		68.39	0.64	15.38		3.69					0.13	1.25	1.63		4.15	4.48	0.22											33		6
507		NAVDAT		In: Proterozoic magmatism of the Rocky Mountains and environs (Part I).	Rocky Mountain Geology. 34; 2, Pages 245-262. 1999.	Barnes-Melanie; Rohs-C-Renee; Anthony-Elizabeth-Y; Van-Schmus-W-Randy; Denison-Rodger-E		35.4745	-101.723	0.04	1370	1385	1400	ICPMS	IGNEOUS	VOLCANIC	FELSIC	TUFF		63.89	0.33	12.73		13.4					0.14	0.42	1.2		4	4.53	0.07											145		335
485		NAVDAT		In: Proterozoic magmatism of the Rocky Mountains and environs (Part I).	Rocky Mountain Geology. 34; 2, Pages 245-262. 1999.	Barnes-Melanie; Rohs-C-Renee; Anthony-Elizabeth-Y; Van-Schmus-W-Randy; Denison-Rodger-E		35.4469	-102.401	0.04	1370	1385	1400	ICPMS	IGNEOUS	VOLCANIC	FELSIC	TUFF		70.63	0.53	15.1		3.03					0.05	0.71	0.47		3.63	5.45	0.13											119		2
497		NAVDAT		In: Proterozoic magmatism of the Rocky Mountains and environs (Part I).	Rocky Mountain Geology. 34; 2, Pages 245-262. 1999.	Barnes-Melanie; Rohs-C-Renee; Anthony-Elizabeth-Y; Van-Schmus-W-Randy; Denison-Rodger-E		35.7307	-102.699	0.04	1370	1385	1400	TIMS	IGNEOUS	VOLCANIC	FELSIC	TUFF
497		NAVDAT		In: Proterozoic magmatism of the Rocky Mountains and environs (Part I).	Rocky Mountain Geology. 34; 2, Pages 245-262. 1999.	Barnes-Melanie; Rohs-C-Renee; Anthony-Elizabeth-Y; Van-Schmus-W-Randy; Denison-Rodger-E		35.7307	-102.699	0.04	1370	1385	1400	ICPMS	IGNEOUS	VOLCANIC	FELSIC	TUFF		70.39	0.47	13.46		2.25					0.08	0.5	2.35		1.9	5.24	0.04		3.18									1		64
960607-1		NAVDAT		Geology and mineral resources of the Brownsboro Quadrangle.	Geological Map Series (Portland). 199?.	Hladky-Frank-R		42.4856	-122.649	0.001	20	27	35	XRF	IGNEOUS	VOLCANIC	INTERMEDIATE	TUFF		61.24	0.95	21.37					4.8		0.07	2.31	6.17		2.6	0.34	0.15		12.7
970320-7		NAVDAT		Geology and mineral resources of the Brownsboro Quadrangle.	Geological Map Series (Portland). 199?.	Hladky-Frank-R		42.453	-122.664	0.001	20	27	35	XRF	IGNEOUS	VOLCANIC	INTERMEDIATE	TUFF		58.47	0.73	18.9					7.11		0.12	1.55	12.05		0.37	0.58	0.14		15
960927-1		NAVDAT		Geology and mineral resources of the Brownsboro Quadrangle.	Geological Map Series (Portland). 199?.	Hladky-Frank-R		42.4086	-122.644	0.001	25	26	28	XRF	IGNEOUS	VOLCANIC	INTERMEDIATE	TUFF		62.56	1.1	16.29					6.81		0.11	1.32	3.97		3.83	3.45	0.55		2.9
WIN JMVF 00-95 SDC A		NAVDAT		A geochemical study on the behavior of rare earth and trace elements in the Otowi Member of the Bandelier Tuff, Jemez Mountains, New Mexico.	Thesis-or-Dissertation	Winters-Roger-Lee		40.25	-104.083	0.1	1.6	1.61	1.62	XRF	IGNEOUS	VOLCANIC	FELSIC	TUFF		76.23	0.14	12.96					1.37		0.07	0.31	0.5		3.34	5.06	0.02											7		6
PHA93612		NAVDAT		Geologic framework of the Clarno Unit, John Day Fossil Beds NationalMonument, central Oregon	Open File Report - State of Oregon, Department of Geology and MineralIndustries, Report: O-02-03, 1 disc, 2002	Bestland, E A; Hammond, P E; Blackwell, D L S; Keys, M A; Retallack, GJ; Stimac, J		44.9242	-120.418	0.0001	43.7	44.8	45.9	XRF	IGNEOUS	VOLCANIC	FELSIC	TUFF		75.43	0.337	13.04				1.06			0.016	0.08	1.57		3.16	3.75	0.107											10
PHA93644		NAVDAT		Geologic framework of the Clarno Unit, John Day Fossil Beds NationalMonument, central Oregon	Open File Report - State of Oregon, Department of Geology and MineralIndustries, Report: O-02-03, 1 disc, 2002	Bestland, E A; Hammond, P E; Blackwell, D L S; Keys, M A; Retallack, GJ; Stimac, J		44.9072	-120.461	0.0001	43.7	44.8	45.9	XRF	IGNEOUS	VOLCANIC	FELSIC	TUFF		72.75	0.215	12.78				1.69			0.023	0.33	1.92		1.04	5.28	0.041											13
PHA94603		NAVDAT		Geologic framework of the Clarno Unit, John Day Fossil Beds NationalMonument, central Oregon	Open File Report - State of Oregon, Department of Geology and MineralIndustries, Report: O-02-03, 1 disc, 2002	Bestland, E A; Hammond, P E; Blackwell, D L S; Keys, M A; Retallack, GJ; Stimac, J		44.8233	-120.556	0.0001	50.7	51.2	51.7	XRF	IGNEOUS	VOLCANIC	FELSIC	TUFF		71.81	0.153	11.94				1.47			0.02	0.18	1.4		1.88	4.42	0.023											12
PHA93609		NAVDAT		Geologic framework of the Clarno Unit, John Day Fossil Beds NationalMonument, central Oregon	Open File Report - State of Oregon, Department of Geology and MineralIndustries, Report: O-02-03, 1 disc, 2002	Bestland, E A; Hammond, P E; Blackwell, D L S; Keys, M A; Retallack, GJ; Stimac, J		44.9222	-120.43	0.0001	43.7	44.8	45.9	XRF	IGNEOUS	VOLCANIC	FELSIC	TUFF		79.47	0.042	10.01				1.59			0.012	1.15	0.92		1.54	1.37	0.011											12
PHA93653		NAVDAT		Geologic framework of the Clarno Unit, John Day Fossil Beds NationalMonument, central Oregon	Open File Report - State of Oregon, Department of Geology and MineralIndustries, Report: O-02-03, 1 disc, 2002	Bestland, E A; Hammond, P E; Blackwell, D L S; Keys, M A; Retallack, GJ; Stimac, J		44.9231	-120.431	0.0001	43.1	43.7	44.3	XRF	IGNEOUS	VOLCANIC	FELSIC	TUFF		63.28	1.11	16.25				5.8			0.034	1.23	2.47		1.44	0.55	0.127											20
PHA94055		NAVDAT		Geologic framework of the Clarno Unit, John Day Fossil Beds NationalMonument, central Oregon	Open File Report - State of Oregon, Department of Geology and MineralIndustries, Report: O-02-03, 1 disc, 2002	Bestland, E A; Hammond, P E; Blackwell, D L S; Keys, M A; Retallack, GJ; Stimac, J		44.9206	-120.453	0.0001	39.2	40.95	42.7	XRF	IGNEOUS	VOLCANIC	FELSIC	TUFF		66.57	0.2	16.11				2.47			0.09	2.33	3.63		1	0.88	0.035											19
PHA94057		NAVDAT		Geologic framework of the Clarno Unit, John Day Fossil Beds NationalMonument, central Oregon	Open File Report - State of Oregon, Department of Geology and MineralIndustries, Report: O-02-03, 1 disc, 2002	Bestland, E A; Hammond, P E; Blackwell, D L S; Keys, M A; Retallack, GJ; Stimac, J		44.9206	-120.453	0.0001	39.2	40.95	42.7	XRF	IGNEOUS	VOLCANIC	FELSIC	TUFF		71.16	0.649	12.24				4.12			0.176	0.22	1.43		2.81	4.15	0.201											12
PHA93615		NAVDAT		Geologic framework of the Clarno Unit, John Day Fossil Beds NationalMonument, central Oregon	Open File Report - State of Oregon, Department of Geology and MineralIndustries, Report: O-02-03, 1 disc, 2002	Bestland, E A; Hammond, P E; Blackwell, D L S; Keys, M A; Retallack, GJ; Stimac, J		44.9358	-120.404	0.0001	39.2	40.95	42.7	XRF	IGNEOUS	VOLCANIC	FELSIC	TUFF		69.33	0.167	12.52				1.18			0.023	0.6	2.18		1.38	4.24	0.034											12
PHA95610		NAVDAT		Geologic framework of the Clarno Unit, John Day Fossil Beds NationalMonument, central Oregon	Open File Report - State of Oregon, Department of Geology and MineralIndustries, Report: O-02-03, 1 disc, 2002	Bestland, E A; Hammond, P E; Blackwell, D L S; Keys, M A; Retallack, GJ; Stimac, J		44.9375	-120.416	0.0001	33.6	35.9	38.2	XRF	IGNEOUS	VOLCANIC	FELSIC	TUFF		71.43	0.14	11.34				0.7			0.024	0.07	2.43		2.49	1.22	0.02											10
PHA95605		NAVDAT		Geologic framework of the Clarno Unit, John Day Fossil Beds NationalMonument, central Oregon	Open File Report - State of Oregon, Department of Geology and MineralIndustries, Report: O-02-03, 1 disc, 2002	Bestland, E A; Hammond, P E; Blackwell, D L S; Keys, M A; Retallack, GJ; Stimac, J		44.9492	-120.394	0.0001	16	24.8	33.6	XRF	IGNEOUS	VOLCANIC	FELSIC	TUFF		66.71	0.315	11.53				2.26			0.046	0.97	3.37		1.19	1.03	0.22											10
WIN JMVF 0001		NAVDAT		A geochemical study on the behavior of rare earth and trace elements in the Otowi Member of the Bandelier Tuff, Jemez Mountains, New Mexico.	Thesis-or-Dissertation	Winters-Roger-Lee		40.25	-104.083	0.1	1.6	1.61	1.62	XRF	IGNEOUS	VOLCANIC	FELSIC	TUFF		77.44	0.04	12.38					1.24		0.08	0	0.26		4.16	4.39	0.01											9		0
WIN JMVF 0001		NAVDAT		A geochemical study on the behavior of rare earth and trace elements in the Otowi Member of the Bandelier Tuff, Jemez Mountains, New Mexico.	Thesis-or-Dissertation	Winters-Roger-Lee		40.25	-104.083	0.1	1.6	1.61	1.62	ICPMS	IGNEOUS	VOLCANIC	FELSIC	TUFF
WIN JMVF 0002		NAVDAT		A geochemical study on the behavior of rare earth and trace elements in the Otowi Member of the Bandelier Tuff, Jemez Mountains, New Mexico.	Thesis-or-Dissertation	Winters-Roger-Lee		40.25	-104.083	0.1	1.6	1.61	1.62	XRF	IGNEOUS	VOLCANIC	FELSIC	TUFF		77.34	0.04	12.33					1.27		0.08	0	0.25		4.25	4.44	0											11		0
WIN JMVF 0002		NAVDAT		A geochemical study on the behavior of rare earth and trace elements in the Otowi Member of the Bandelier Tuff, Jemez Mountains, New Mexico.	Thesis-or-Dissertation	Winters-Roger-Lee		40.25	-104.083	0.1	1.6	1.61	1.62	ICPMS	IGNEOUS	VOLCANIC	FELSIC	TUFF
WIN JMVF 0003		NAVDAT		A geochemical study on the behavior of rare earth and trace elements in the Otowi Member of the Bandelier Tuff, Jemez Mountains, New Mexico.	Thesis-or-Dissertation	Winters-Roger-Lee		40.25	-104.083	0.1	1.6	1.61	1.62	XRF	IGNEOUS	VOLCANIC	FELSIC	TUFF		77.25	0.04	12.41					1.2		0.08	0	0.24		4.24	4.53	0.01											9		0
WIN JMVF 0003		NAVDAT		A geochemical study on the behavior of rare earth and trace elements in the Otowi Member of the Bandelier Tuff, Jemez Mountains, New Mexico.	Thesis-or-Dissertation	Winters-Roger-Lee		40.25	-104.083	0.1	1.6	1.61	1.62	ICPMS	IGNEOUS	VOLCANIC	FELSIC	TUFF
WIN JMVF 0004		NAVDAT		A geochemical study on the behavior of rare earth and trace elements in the Otowi Member of the Bandelier Tuff, Jemez Mountains, New Mexico.	Thesis-or-Dissertation	Winters-Roger-Lee		40.25	-104.083	0.1	1.6	1.61	1.62	XRF	IGNEOUS	VOLCANIC	FELSIC	TUFF		74.6	0.09	10.73					1.19		0.04	3.89	1.94		3.77	3.74	0.01											81		11
WIN JMVF 0004		NAVDAT		A geochemical study on the behavior of rare earth and trace elements in the Otowi Member of the Bandelier Tuff, Jemez Mountains, New Mexico.	Thesis-or-Dissertation	Winters-Roger-Lee		40.25	-104.083	0.1	1.6	1.61	1.62	ICPMS	IGNEOUS	VOLCANIC	FELSIC	TUFF
WIN JMVF 0005		NAVDAT		A geochemical study on the behavior of rare earth and trace elements in the Otowi Member of the Bandelier Tuff, Jemez Mountains, New Mexico.	Thesis-or-Dissertation	Winters-Roger-Lee		40.25	-104.083	0.1	1.6	1.61	1.62	XRF	IGNEOUS	VOLCANIC	FELSIC	TUFF		75.67	0.09	11.26					1.15		0.04	2.53	1.39		3.88	3.99	0.01											56		9
WIN JMVF 0005		NAVDAT		A geochemical study on the behavior of rare earth and trace elements in the Otowi Member of the Bandelier Tuff, Jemez Mountains, New Mexico.	Thesis-or-Dissertation	Winters-Roger-Lee		40.25	-104.083	0.1	1.6	1.61	1.62	ICPMS	IGNEOUS	VOLCANIC	FELSIC	TUFF
WINJMVF 06Ac		NAVDAT		A geochemical study on the behavior of rare earth and trace elements in the Otowi Member of the Bandelier Tuff, Jemez Mountains, New Mexico.	Thesis-or-Dissertation	Winters-Roger-Lee		40.25	-104.083	0.1	1.6	1.61	1.62	XRF	IGNEOUS	VOLCANIC	FELSIC	TUFF		77.41	0.11	12.32					1.3		0.05	0.29	0.5		3.91	4.1	0.01											4		4
WINJMVF 06Ac		NAVDAT		A geochemical study on the behavior of rare earth and trace elements in the Otowi Member of the Bandelier Tuff, Jemez Mountains, New Mexico.	Thesis-or-Dissertation	Winters-Roger-Lee		40.25	-104.083	0.1	1.6	1.61	1.62	ICPMS	IGNEOUS	VOLCANIC	FELSIC	TUFF
WINJMVF0008		NAVDAT		A geochemical study on the behavior of rare earth and trace elements in the Otowi Member of the Bandelier Tuff, Jemez Mountains, New Mexico.	Thesis-or-Dissertation	Winters-Roger-Lee		40.25	-104.083	0.1	1.6	1.61	1.62	XRF	IGNEOUS	VOLCANIC	FELSIC	TUFF		76.71	0.12	12.35					1.42		0.11	0.3	0.75		3.97	4.26	0.03											11		20
WINJMVF0008		NAVDAT		A geochemical study on the behavior of rare earth and trace elements in the Otowi Member of the Bandelier Tuff, Jemez Mountains, New Mexico.	Thesis-or-Dissertation	Winters-Roger-Lee		40.25	-104.083	0.1	1.6	1.61	1.62	ICPMS	IGNEOUS	VOLCANIC	FELSIC	TUFF
WIN JMVF0009		NAVDAT		A geochemical study on the behavior of rare earth and trace elements in the Otowi Member of the Bandelier Tuff, Jemez Mountains, New Mexico.	Thesis-or-Dissertation	Winters-Roger-Lee		40.25	-104.083	0.1	1.6	1.61	1.62	XRF	IGNEOUS	VOLCANIC	FELSIC	TUFF		77.15	0.06	12.3					1.22		0.07	0.02	0.34		4.31	4.52	0.01											7		0
WIN JMVF0009		NAVDAT		A geochemical study on the behavior of rare earth and trace elements in the Otowi Member of the Bandelier Tuff, Jemez Mountains, New Mexico.	Thesis-or-Dissertation	Winters-Roger-Lee		40.25	-104.083	0.1	1.6	1.61	1.62	ICPMS	IGNEOUS	VOLCANIC	FELSIC	TUFF
WIN JMVF0010		NAVDAT		A geochemical study on the behavior of rare earth and trace elements in the Otowi Member of the Bandelier Tuff, Jemez Mountains, New Mexico.	Thesis-or-Dissertation	Winters-Roger-Lee		40.25	-104.083	0.1	1.6	1.61	1.62	XRF	IGNEOUS	VOLCANIC	FELSIC	TUFF		77.3	0.06	12.22					1.23		0.07	0.02	0.34		4.19	4.55	0.01											7		0
WIN JMVF0010		NAVDAT		A geochemical study on the behavior of rare earth and trace elements in the Otowi Member of the Bandelier Tuff, Jemez Mountains, New Mexico.	Thesis-or-Dissertation	Winters-Roger-Lee		40.25	-104.083	0.1	1.6	1.61	1.62	ICPMS	IGNEOUS	VOLCANIC	FELSIC	TUFF
WIN JMVF0011		NAVDAT		A geochemical study on the behavior of rare earth and trace elements in the Otowi Member of the Bandelier Tuff, Jemez Mountains, New Mexico.	Thesis-or-Dissertation	Winters-Roger-Lee		40.25	-104.083	0.1	1.6	1.61	1.62	XRF	IGNEOUS	VOLCANIC	FELSIC	TUFF		76.92	0.07	12.47					1.21		0.06	0.07	0.35		4.19	4.64	0.01											6		0
WIN JMVF0011		NAVDAT		A geochemical study on the behavior of rare earth and trace elements in the Otowi Member of the Bandelier Tuff, Jemez Mountains, New Mexico.	Thesis-or-Dissertation	Winters-Roger-Lee		40.25	-104.083	0.1	1.6	1.61	1.62	ICPMS	IGNEOUS	VOLCANIC	FELSIC	TUFF
WIN JMVF0012		NAVDAT		A geochemical study on the behavior of rare earth and trace elements in the Otowi Member of the Bandelier Tuff, Jemez Mountains, New Mexico.	Thesis-or-Dissertation	Winters-Roger-Lee		40.25	-104.083	0.1	1.6	1.61	1.62	XRF	IGNEOUS	VOLCANIC	FELSIC	TUFF		77.2	0.06	12.19					1.16		0.06	0.04	0.59		4.05	4.65	0.01											6		0
WIN JMVF0012		NAVDAT		A geochemical study on the behavior of rare earth and trace elements in the Otowi Member of the Bandelier Tuff, Jemez Mountains, New Mexico.	Thesis-or-Dissertation	Winters-Roger-Lee		40.25	-104.083	0.1	1.6	1.61	1.62	ICPMS	IGNEOUS	VOLCANIC	FELSIC	TUFF
WIN JMVF0013		NAVDAT		A geochemical study on the behavior of rare earth and trace elements in the Otowi Member of the Bandelier Tuff, Jemez Mountains, New Mexico.	Thesis-or-Dissertation	Winters-Roger-Lee		40.25	-104.083	0.1	1.6	1.61	1.62	XRF	IGNEOUS	VOLCANIC	FELSIC	TUFF		77.14	0.09	12.5					1.21		0.06	0.06	0.3		3.3	5.33	0.01											5		0
WIN JMVF0013		NAVDAT		A geochemical study on the behavior of rare earth and trace elements in the Otowi Member of the Bandelier Tuff, Jemez Mountains, New Mexico.	Thesis-or-Dissertation	Winters-Roger-Lee		40.25	-104.083	0.1	1.6	1.61	1.62	ICPMS	IGNEOUS	VOLCANIC	FELSIC	TUFF
WIN JMVF0014		NAVDAT		A geochemical study on the behavior of rare earth and trace elements in the Otowi Member of the Bandelier Tuff, Jemez Mountains, New Mexico.	Thesis-or-Dissertation	Winters-Roger-Lee		40.25	-104.083	0.1	1.6	1.61	1.62	XRF	IGNEOUS	VOLCANIC	FELSIC	TUFF		77.24	0.05	12.07					1.43		0.1	0	0.37		4.13	4.6	0.01											9		0
WIN JMVF0014		NAVDAT		A geochemical study on the behavior of rare earth and trace elements in the Otowi Member of the Bandelier Tuff, Jemez Mountains, New Mexico.	Thesis-or-Dissertation	Winters-Roger-Lee		40.25	-104.083	0.1	1.6	1.61	1.62	ICPMS	IGNEOUS	VOLCANIC	FELSIC	TUFF
WIN JMVF0016		NAVDAT		A geochemical study on the behavior of rare earth and trace elements in the Otowi Member of the Bandelier Tuff, Jemez Mountains, New Mexico.	Thesis-or-Dissertation	Winters-Roger-Lee		40.25	-104.083	0.1	1.6	1.61	1.62	XRF	IGNEOUS	VOLCANIC	FELSIC	TUFF		77.03	0.05	12.29					1.31		0.08	0.01	0.39		4.43	4.38	0.01											10		0
WIN JMVF0016		NAVDAT		A geochemical study on the behavior of rare earth and trace elements in the Otowi Member of the Bandelier Tuff, Jemez Mountains, New Mexico.	Thesis-or-Dissertation	Winters-Roger-Lee		40.25	-104.083	0.1	1.6	1.61	1.62	ICPMS	IGNEOUS	VOLCANIC	FELSIC	TUFF
WIN JMVF0019		NAVDAT		A geochemical study on the behavior of rare earth and trace elements in the Otowi Member of the Bandelier Tuff, Jemez Mountains, New Mexico.	Thesis-or-Dissertation	Winters-Roger-Lee		40.25	-104.083	0.1	1.6	1.61	1.62	XRF	IGNEOUS	VOLCANIC	FELSIC	TUFF		77.36	0.07	12.31					1.15		0.05	0.02	0.44		3.68	4.91	0.01											5		0
WIN JMVF0019		NAVDAT		A geochemical study on the behavior of rare earth and trace elements in the Otowi Member of the Bandelier Tuff, Jemez Mountains, New Mexico.	Thesis-or-Dissertation	Winters-Roger-Lee		40.25	-104.083	0.1	1.6	1.61	1.62	ICPMS	IGNEOUS	VOLCANIC	FELSIC	TUFF
WIN JMVF0022		NAVDAT		A geochemical study on the behavior of rare earth and trace elements in the Otowi Member of the Bandelier Tuff, Jemez Mountains, New Mexico.	Thesis-or-Dissertation	Winters-Roger-Lee		40.25	-104.083	0.1	1.6	1.61	1.62	XRF	IGNEOUS	VOLCANIC	FELSIC	TUFF		76.82	0.09	12.6					1.3		0.06	0.12	0.48		3.61	4.91	0.01											5		0
WIN JMVF0022		NAVDAT		A geochemical study on the behavior of rare earth and trace elements in the Otowi Member of the Bandelier Tuff, Jemez Mountains, New Mexico.	Thesis-or-Dissertation	Winters-Roger-Lee		40.25	-104.083	0.1	1.6	1.61	1.62	ICPMS	IGNEOUS	VOLCANIC	FELSIC	TUFF
WIN JMVF0023		NAVDAT		A geochemical study on the behavior of rare earth and trace elements in the Otowi Member of the Bandelier Tuff, Jemez Mountains, New Mexico.	Thesis-or-Dissertation	Winters-Roger-Lee		40.25	-104.083	0.1	1.6	1.61	1.62	XRF	IGNEOUS	VOLCANIC	FELSIC	TUFF		77.17	0.12	12.31					1.34		0.05	0.12	0.5		3.74	4.63	0.02											6		0
WIN JMVF0023		NAVDAT		A geochemical study on the behavior of rare earth and trace elements in the Otowi Member of the Bandelier Tuff, Jemez Mountains, New Mexico.	Thesis-or-Dissertation	Winters-Roger-Lee		40.25	-104.083	0.1	1.6	1.61	1.62	ICPMS	IGNEOUS	VOLCANIC	FELSIC	TUFF
WIN JMVF0025		NAVDAT		A geochemical study on the behavior of rare earth and trace elements in the Otowi Member of the Bandelier Tuff, Jemez Mountains, New Mexico.	Thesis-or-Dissertation	Winters-Roger-Lee		40.25	-104.083	0.1	1.6	1.61	1.62	XRF	IGNEOUS	VOLCANIC	FELSIC	TUFF		77.63	0.09	12.19					1.15		0.05	0.06	0.33		3.48	5.01	0.01											2		0
WIN JMVF0025		NAVDAT		A geochemical study on the behavior of rare earth and trace elements in the Otowi Member of the Bandelier Tuff, Jemez Mountains, New Mexico.	Thesis-or-Dissertation	Winters-Roger-Lee		40.25	-104.083	0.1	1.6	1.61	1.62	ICPMS	IGNEOUS	VOLCANIC	FELSIC	TUFF
WIN JMVF28		NAVDAT		A geochemical study on the behavior of rare earth and trace elements in the Otowi Member of the Bandelier Tuff, Jemez Mountains, New Mexico.	Thesis-or-Dissertation	Winters-Roger-Lee		40.25	-104.083	0.1	1.6	1.61	1.62	XRF	IGNEOUS	VOLCANIC	FELSIC	TUFF		77.78	0.09	11.95					1.2		0.05	0	0.28		3.82	4.82	0.01											4		0
WIN JMVF28		NAVDAT		A geochemical study on the behavior of rare earth and trace elements in the Otowi Member of the Bandelier Tuff, Jemez Mountains, New Mexico.	Thesis-or-Dissertation	Winters-Roger-Lee		40.25	-104.083	0.1	1.6	1.61	1.62	ICPMS	IGNEOUS	VOLCANIC	FELSIC	TUFF
WIN JMVF29		NAVDAT		A geochemical study on the behavior of rare earth and trace elements in the Otowi Member of the Bandelier Tuff, Jemez Mountains, New Mexico.	Thesis-or-Dissertation	Winters-Roger-Lee		40.25	-104.083	0.1	1.6	1.61	1.62	XRF	IGNEOUS	VOLCANIC	FELSIC	TUFF		76.76	0.05	12.5					1.31		0.08	0.03	0.33		3.89	5.05	0.01											10		2
WIN JMVF29		NAVDAT		A geochemical study on the behavior of rare earth and trace elements in the Otowi Member of the Bandelier Tuff, Jemez Mountains, New Mexico.	Thesis-or-Dissertation	Winters-Roger-Lee		40.25	-104.083	0.1	1.6	1.61	1.62	ICPMS	IGNEOUS	VOLCANIC	FELSIC	TUFF
WIN JMVF71		NAVDAT		A geochemical study on the behavior of rare earth and trace elements in the Otowi Member of the Bandelier Tuff, Jemez Mountains, New Mexico.	Thesis-or-Dissertation	Winters-Roger-Lee		40.25	-104.083	0.1	1.6	1.61	1.62	XRF	IGNEOUS	VOLCANIC	FELSIC	TUFF		77.16	0.06	12.36					1.24		0.07	0.03	0.45		3.59	5.04	0.01											7		0
WIN JMVF71		NAVDAT		A geochemical study on the behavior of rare earth and trace elements in the Otowi Member of the Bandelier Tuff, Jemez Mountains, New Mexico.	Thesis-or-Dissertation	Winters-Roger-Lee		40.25	-104.083	0.1	1.6	1.61	1.62	ICPMS	IGNEOUS	VOLCANIC	FELSIC	TUFF
WIN JMVF0072		NAVDAT		A geochemical study on the behavior of rare earth and trace elements in the Otowi Member of the Bandelier Tuff, Jemez Mountains, New Mexico.	Thesis-or-Dissertation	Winters-Roger-Lee		40.25	-104.083	0.1	1.6	1.61	1.62	XRF	IGNEOUS	VOLCANIC	FELSIC	TUFF		77.5	0.09	12.22					1.16		0.04	0.02	0.36		3.75	4.85	0.01											6		0
WIN JMVF0072		NAVDAT		A geochemical study on the behavior of rare earth and trace elements in the Otowi Member of the Bandelier Tuff, Jemez Mountains, New Mexico.	Thesis-or-Dissertation	Winters-Roger-Lee		40.25	-104.083	0.1	1.6	1.61	1.62	ICPMS	IGNEOUS	VOLCANIC	FELSIC	TUFF
WIN JMVF0073		NAVDAT		A geochemical study on the behavior of rare earth and trace elements in the Otowi Member of the Bandelier Tuff, Jemez Mountains, New Mexico.	Thesis-or-Dissertation	Winters-Roger-Lee		40.25	-104.083	0.1	1.6	1.61	1.62	XRF	IGNEOUS	VOLCANIC	FELSIC	TUFF		76.65	0.1	12.47					1.3		0.06	0.09	0.42		3.7	5.18	0.01											3		0
WIN JMVF0073		NAVDAT		A geochemical study on the behavior of rare earth and trace elements in the Otowi Member of the Bandelier Tuff, Jemez Mountains, New Mexico.	Thesis-or-Dissertation	Winters-Roger-Lee		40.25	-104.083	0.1	1.6	1.61	1.62	ICPMS	IGNEOUS	VOLCANIC	FELSIC	TUFF
WIN JMVF0074		NAVDAT		A geochemical study on the behavior of rare earth and trace elements in the Otowi Member of the Bandelier Tuff, Jemez Mountains, New Mexico.	Thesis-or-Dissertation	Winters-Roger-Lee		40.25	-104.083	0.1	1.6	1.61	1.62	XRF	IGNEOUS	VOLCANIC	FELSIC	TUFF		77.37	0.08	12.5					1.08		0.06	0.06	0.41		3.92	4.51	0.01											4		0
WIN JMVF0074		NAVDAT		A geochemical study on the behavior of rare earth and trace elements in the Otowi Member of the Bandelier Tuff, Jemez Mountains, New Mexico.	Thesis-or-Dissertation	Winters-Roger-Lee		40.25	-104.083	0.1	1.6	1.61	1.62	ICPMS	IGNEOUS	VOLCANIC	FELSIC	TUFF
WIN JMVF 00-76		NAVDAT		A geochemical study on the behavior of rare earth and trace elements in the Otowi Member of the Bandelier Tuff, Jemez Mountains, New Mexico.	Thesis-or-Dissertation	Winters-Roger-Lee		40.25	-104.083	0.1	1.6	1.61	1.62	XRF	IGNEOUS	VOLCANIC	FELSIC	TUFF		77.55	0.09	12.36					1.07		0.05	0	0.37		3.9	4.59	0.01											6		0
WIN JMVF 00-76		NAVDAT		A geochemical study on the behavior of rare earth and trace elements in the Otowi Member of the Bandelier Tuff, Jemez Mountains, New Mexico.	Thesis-or-Dissertation	Winters-Roger-Lee		40.25	-104.083	0.1	1.6	1.61	1.62	ICPMS	IGNEOUS	VOLCANIC	FELSIC	TUFF
WIN JMVF 00-78		NAVDAT		A geochemical study on the behavior of rare earth and trace elements in the Otowi Member of the Bandelier Tuff, Jemez Mountains, New Mexico.	Thesis-or-Dissertation	Winters-Roger-Lee		40.25	-104.083	0.1	1.6	1.61	1.62	XRF	IGNEOUS	VOLCANIC	FELSIC	TUFF		77.47	0.06	12.26					1.18		0.06	0	0.31		3.7	4.94	0.01											6		1
WIN JMVF 00-78		NAVDAT		A geochemical study on the behavior of rare earth and trace elements in the Otowi Member of the Bandelier Tuff, Jemez Mountains, New Mexico.	Thesis-or-Dissertation	Winters-Roger-Lee		40.25	-104.083	0.1	1.6	1.61	1.62	ICPMS	IGNEOUS	VOLCANIC	FELSIC	TUFF
WIN JMVF 00-81 CTR		NAVDAT		A geochemical study on the behavior of rare earth and trace elements in the Otowi Member of the Bandelier Tuff, Jemez Mountains, New Mexico.	Thesis-or-Dissertation	Winters-Roger-Lee		40.25	-104.083	0.1	1.6	1.61	1.62	XRF	IGNEOUS	VOLCANIC	FELSIC	TUFF		76.73	0.11	12.8					1.18		0.05	0.08	0.58		3.84	4.61	0.01											2		0
WIN JMVF 00-81 CTR		NAVDAT		A geochemical study on the behavior of rare earth and trace elements in the Otowi Member of the Bandelier Tuff, Jemez Mountains, New Mexico.	Thesis-or-Dissertation	Winters-Roger-Lee		40.25	-104.083	0.1	1.6	1.61	1.62	ICPMS	IGNEOUS	VOLCANIC	FELSIC	TUFF
WIN JMVF 00-31		NAVDAT		A geochemical study on the behavior of rare earth and trace elements in the Otowi Member of the Bandelier Tuff, Jemez Mountains, New Mexico.	Thesis-or-Dissertation	Winters-Roger-Lee		40.25	-104.083	0.1	1.6	1.61	1.62	XRF	IGNEOUS	VOLCANIC	FELSIC	TUFF		74.94	0.09	14.75					1.48		0.06	0.17	0.57		3.72	4.18	0.02											11		5
WIN JMVF 00-31		NAVDAT		A geochemical study on the behavior of rare earth and trace elements in the Otowi Member of the Bandelier Tuff, Jemez Mountains, New Mexico.	Thesis-or-Dissertation	Winters-Roger-Lee		40.25	-104.083	0.1	1.6	1.61	1.62	ICPMS	IGNEOUS	VOLCANIC	FELSIC	TUFF
WIN JMVF 00-32		NAVDAT		A geochemical study on the behavior of rare earth and trace elements in the Otowi Member of the Bandelier Tuff, Jemez Mountains, New Mexico.	Thesis-or-Dissertation	Winters-Roger-Lee		40.25	-104.083	0.1	1.6	1.61	1.62	XRF	IGNEOUS	VOLCANIC	FELSIC	TUFF		76.19	0.07	13.65					1.09		0.07	0.04	0.47		4.03	4.36	0.01											5		3
WIN JMVF 00-32		NAVDAT		A geochemical study on the behavior of rare earth and trace elements in the Otowi Member of the Bandelier Tuff, Jemez Mountains, New Mexico.	Thesis-or-Dissertation	Winters-Roger-Lee		40.25	-104.083	0.1	1.6	1.61	1.62	ICPMS	IGNEOUS	VOLCANIC	FELSIC	TUFF
WIN JMVF 00-33		NAVDAT		A geochemical study on the behavior of rare earth and trace elements in the Otowi Member of the Bandelier Tuff, Jemez Mountains, New Mexico.	Thesis-or-Dissertation	Winters-Roger-Lee		40.25	-104.083	0.1	1.6	1.61	1.62	XRF	IGNEOUS	VOLCANIC	FELSIC	TUFF		76.49	0.06	13.43					1.08		0.07	0.08	0.43		4.05	4.31	0.01											8		1
WIN JMVF 00-33		NAVDAT		A geochemical study on the behavior of rare earth and trace elements in the Otowi Member of the Bandelier Tuff, Jemez Mountains, New Mexico.	Thesis-or-Dissertation	Winters-Roger-Lee		40.25	-104.083	0.1	1.6	1.61	1.62	ICPMS	IGNEOUS	VOLCANIC	FELSIC	TUFF
WIN JMVF 00-34		NAVDAT		A geochemical study on the behavior of rare earth and trace elements in the Otowi Member of the Bandelier Tuff, Jemez Mountains, New Mexico.	Thesis-or-Dissertation	Winters-Roger-Lee		40.25	-104.083	0.1	1.6	1.61	1.62	XRF	IGNEOUS	VOLCANIC	FELSIC	TUFF		76.53	0.08	13.36					1.25		0.07	0.13	0.47		3.68	4.41	0.02											9		2
WIN JMVF 00-34		NAVDAT		A geochemical study on the behavior of rare earth and trace elements in the Otowi Member of the Bandelier Tuff, Jemez Mountains, New Mexico.	Thesis-or-Dissertation	Winters-Roger-Lee		40.25	-104.083	0.1	1.6	1.61	1.62	ICPMS	IGNEOUS	VOLCANIC	FELSIC	TUFF
WIN JMVF 00-35		NAVDAT		A geochemical study on the behavior of rare earth and trace elements in the Otowi Member of the Bandelier Tuff, Jemez Mountains, New Mexico.	Thesis-or-Dissertation	Winters-Roger-Lee		40.25	-104.083	0.1	1.6	1.61	1.62	XRF	IGNEOUS	VOLCANIC	FELSIC	TUFF		76.8	0.06	12.83					1.13		0.08	0.01	0.37		4.18	4.54	0.01											10		0
WIN JMVF 00-35		NAVDAT		A geochemical study on the behavior of rare earth and trace elements in the Otowi Member of the Bandelier Tuff, Jemez Mountains, New Mexico.	Thesis-or-Dissertation	Winters-Roger-Lee		40.25	-104.083	0.1	1.6	1.61	1.62	ICPMS	IGNEOUS	VOLCANIC	FELSIC	TUFF
WIN JMVF 00-36		NAVDAT		A geochemical study on the behavior of rare earth and trace elements in the Otowi Member of the Bandelier Tuff, Jemez Mountains, New Mexico.	Thesis-or-Dissertation	Winters-Roger-Lee		40.25	-104.083	0.1	1.6	1.61	1.62	XRF	IGNEOUS	VOLCANIC	FELSIC	TUFF		76.62	0.06	12.99					1.15		0.07	0.02	0.43		3.96	4.7	0.01											7		0
WIN JMVF 00-36		NAVDAT		A geochemical study on the behavior of rare earth and trace elements in the Otowi Member of the Bandelier Tuff, Jemez Mountains, New Mexico.	Thesis-or-Dissertation	Winters-Roger-Lee		40.25	-104.083	0.1	1.6	1.61	1.62	ICPMS	IGNEOUS	VOLCANIC	FELSIC	TUFF
WIN JMVF 00-37		NAVDAT		A geochemical study on the behavior of rare earth and trace elements in the Otowi Member of the Bandelier Tuff, Jemez Mountains, New Mexico.	Thesis-or-Dissertation	Winters-Roger-Lee		40.25	-104.083	0.1	1.6	1.61	1.62	XRF	IGNEOUS	VOLCANIC	FELSIC	TUFF		76.74	0.05	12.98					1.04		0.07	0.03	0.38		4.14	4.56	0.01											8		2
WIN JMVF 00-37		NAVDAT		A geochemical study on the behavior of rare earth and trace elements in the Otowi Member of the Bandelier Tuff, Jemez Mountains, New Mexico.	Thesis-or-Dissertation	Winters-Roger-Lee		40.25	-104.083	0.1	1.6	1.61	1.62	ICPMS	IGNEOUS	VOLCANIC	FELSIC	TUFF
WIN JMVF 00-38		NAVDAT		A geochemical study on the behavior of rare earth and trace elements in the Otowi Member of the Bandelier Tuff, Jemez Mountains, New Mexico.	Thesis-or-Dissertation	Winters-Roger-Lee		40.25	-104.083	0.1	1.6	1.61	1.62	XRF	IGNEOUS	VOLCANIC	FELSIC	TUFF		76.82	0.05	12.91					1.08		0.07	0.01	0.36		4.04	4.66	0.01											7		0
WIN JMVF 00-38		NAVDAT		A geochemical study on the behavior of rare earth and trace elements in the Otowi Member of the Bandelier Tuff, Jemez Mountains, New Mexico.	Thesis-or-Dissertation	Winters-Roger-Lee		40.25	-104.083	0.1	1.6	1.61	1.62	ICPMS	IGNEOUS	VOLCANIC	FELSIC	TUFF
WIN JMVF 00-39		NAVDAT		A geochemical study on the behavior of rare earth and trace elements in the Otowi Member of the Bandelier Tuff, Jemez Mountains, New Mexico.	Thesis-or-Dissertation	Winters-Roger-Lee		40.25	-104.083	0.1	1.6	1.61	1.62	XRF	IGNEOUS	VOLCANIC	FELSIC	TUFF		76.68	0.06	13.11					1		0.07	0.03	0.41		4.22	4.42	0.01											6		1
WIN JMVF 00-39		NAVDAT		A geochemical study on the behavior of rare earth and trace elements in the Otowi Member of the Bandelier Tuff, Jemez Mountains, New Mexico.	Thesis-or-Dissertation	Winters-Roger-Lee		40.25	-104.083	0.1	1.6	1.61	1.62	ICPMS	IGNEOUS	VOLCANIC	FELSIC	TUFF
WIN JMVF 00-40		NAVDAT		A geochemical study on the behavior of rare earth and trace elements in the Otowi Member of the Bandelier Tuff, Jemez Mountains, New Mexico.	Thesis-or-Dissertation	Winters-Roger-Lee		40.25	-104.083	0.1	1.6	1.61	1.62	XRF	IGNEOUS	VOLCANIC	FELSIC	TUFF		76.36	0.06	13.37					1.08		0.07	0.02	0.38		4.21	4.44	0.01											6		1
WIN JMVF 00-40		NAVDAT		A geochemical study on the behavior of rare earth and trace elements in the Otowi Member of the Bandelier Tuff, Jemez Mountains, New Mexico.	Thesis-or-Dissertation	Winters-Roger-Lee		40.25	-104.083	0.1	1.6	1.61	1.62	ICPMS	IGNEOUS	VOLCANIC	FELSIC	TUFF
WIN JM 00-223		NAVDAT		A geochemical study on the behavior of rare earth and trace elements in the Otowi Member of the Bandelier Tuff, Jemez Mountains, New Mexico.	Thesis-or-Dissertation	Winters-Roger-Lee		40.25	-104.083	0.1	1.6	1.61	1.62	XRF	IGNEOUS	VOLCANIC	FELSIC	TUFF		76.63	0.06	12.83					1.06		0.07	0.06	0.47		4.48	4.32	0.02											6		2
WIN JM 00-223		NAVDAT		A geochemical study on the behavior of rare earth and trace elements in the Otowi Member of the Bandelier Tuff, Jemez Mountains, New Mexico.	Thesis-or-Dissertation	Winters-Roger-Lee		40.25	-104.083	0.1	1.6	1.61	1.62	ICPMS	IGNEOUS	VOLCANIC	FELSIC	TUFF
WIN JM 00-224		NAVDAT		A geochemical study on the behavior of rare earth and trace elements in the Otowi Member of the Bandelier Tuff, Jemez Mountains, New Mexico.	Thesis-or-Dissertation	Winters-Roger-Lee		40.25	-104.083	0.1	1.6	1.61	1.62	XRF	IGNEOUS	VOLCANIC	FELSIC	TUFF		77.09	0.07	12.54					1.14		0.07	0.11	0.54		4.23	4.2	0.02											5		0
WIN JM 00-224		NAVDAT		A geochemical study on the behavior of rare earth and trace elements in the Otowi Member of the Bandelier Tuff, Jemez Mountains, New Mexico.	Thesis-or-Dissertation	Winters-Roger-Lee		40.25	-104.083	0.1	1.6	1.61	1.62	ICPMS	IGNEOUS	VOLCANIC	FELSIC	TUFF
WIN JM 00-225		NAVDAT		A geochemical study on the behavior of rare earth and trace elements in the Otowi Member of the Bandelier Tuff, Jemez Mountains, New Mexico.	Thesis-or-Dissertation	Winters-Roger-Lee		40.25	-104.083	0.1	1.6	1.61	1.62	XRF	IGNEOUS	VOLCANIC	FELSIC	TUFF		76.91	0.06	12.84					1.08		0.07	0.02	0.34		4.38	4.29	0.01											8		2
WIN JM 00-225		NAVDAT		A geochemical study on the behavior of rare earth and trace elements in the Otowi Member of the Bandelier Tuff, Jemez Mountains, New Mexico.	Thesis-or-Dissertation	Winters-Roger-Lee		40.25	-104.083	0.1	1.6	1.61	1.62	ICPMS	IGNEOUS	VOLCANIC	FELSIC	TUFF
WIN JM 00-226		NAVDAT		A geochemical study on the behavior of rare earth and trace elements in the Otowi Member of the Bandelier Tuff, Jemez Mountains, New Mexico.	Thesis-or-Dissertation	Winters-Roger-Lee		40.25	-104.083	0.1	1.6	1.61	1.62	XRF	IGNEOUS	VOLCANIC	FELSIC	TUFF		76.85	0.05	12.88					1.07		0.07	0.03	0.34		4.13	4.57	0.01											7		3
WIN JM 00-226		NAVDAT		A geochemical study on the behavior of rare earth and trace elements in the Otowi Member of the Bandelier Tuff, Jemez Mountains, New Mexico.	Thesis-or-Dissertation	Winters-Roger-Lee		40.25	-104.083	0.1	1.6	1.61	1.62	ICPMS	IGNEOUS	VOLCANIC	FELSIC	TUFF
WIN JM00-227		NAVDAT		A geochemical study on the behavior of rare earth and trace elements in the Otowi Member of the Bandelier Tuff, Jemez Mountains, New Mexico.	Thesis-or-Dissertation	Winters-Roger-Lee		40.25	-104.083	0.1	1.6	1.61	1.62	XRF	IGNEOUS	VOLCANIC	FELSIC	TUFF		76.66	0.06	12.81					1.21		0.08	0.06	0.42		4.27	4.39	0.03											7		2
WIN JM00-227		NAVDAT		A geochemical study on the behavior of rare earth and trace elements in the Otowi Member of the Bandelier Tuff, Jemez Mountains, New Mexico.	Thesis-or-Dissertation	Winters-Roger-Lee		40.25	-104.083	0.1	1.6	1.61	1.62	ICPMS	IGNEOUS	VOLCANIC	FELSIC	TUFF
WIN JM00-230		NAVDAT		A geochemical study on the behavior of rare earth and trace elements in the Otowi Member of the Bandelier Tuff, Jemez Mountains, New Mexico.	Thesis-or-Dissertation	Winters-Roger-Lee		40.25	-104.083	0.1	1.6	1.61	1.62	XRF	IGNEOUS	VOLCANIC	FELSIC	TUFF		76.6	0.07	12.56					1.2		0.07	0.1	0.66		4.4	4.33	0.02											7		2
WIN JM00-230		NAVDAT		A geochemical study on the behavior of rare earth and trace elements in the Otowi Member of the Bandelier Tuff, Jemez Mountains, New Mexico.	Thesis-or-Dissertation	Winters-Roger-Lee		40.25	-104.083	0.1	1.6	1.61	1.62	ICPMS	IGNEOUS	VOLCANIC	FELSIC	TUFF
WIM JMVF 00-41		NAVDAT		A geochemical study on the behavior of rare earth and trace elements in the Otowi Member of the Bandelier Tuff, Jemez Mountains, New Mexico.	Thesis-or-Dissertation	Winters-Roger-Lee		40.25	-104.083	0.1	1.6	1.61	1.62	XRF	IGNEOUS	VOLCANIC	FELSIC	TUFF		76.71	0.07	13.28					1.22		0.07	0.08	0.44		3.68	4.43	0.02											6		1
WIM JMVF 00-41		NAVDAT		A geochemical study on the behavior of rare earth and trace elements in the Otowi Member of the Bandelier Tuff, Jemez Mountains, New Mexico.	Thesis-or-Dissertation	Winters-Roger-Lee		40.25	-104.083	0.1	1.6	1.61	1.62	ICPMS	IGNEOUS	VOLCANIC	FELSIC	TUFF
WIM JMVF 00-43		NAVDAT		A geochemical study on the behavior of rare earth and trace elements in the Otowi Member of the Bandelier Tuff, Jemez Mountains, New Mexico.	Thesis-or-Dissertation	Winters-Roger-Lee		40.25	-104.083	0.1	1.6	1.61	1.62	XRF	IGNEOUS	VOLCANIC	FELSIC	TUFF		76.66	0.05	12.84					1.15		0.08	0.02	0.33		4.15	4.71	0.01											7		0
WIM JMVF 00-43		NAVDAT		A geochemical study on the behavior of rare earth and trace elements in the Otowi Member of the Bandelier Tuff, Jemez Mountains, New Mexico.	Thesis-or-Dissertation	Winters-Roger-Lee		40.25	-104.083	0.1	1.6	1.61	1.62	ICPMS	IGNEOUS	VOLCANIC	FELSIC	TUFF
WIM JMVF 00-46		NAVDAT		A geochemical study on the behavior of rare earth and trace elements in the Otowi Member of the Bandelier Tuff, Jemez Mountains, New Mexico.	Thesis-or-Dissertation	Winters-Roger-Lee		40.25	-104.083	0.1	1.6	1.61	1.62	XRF	IGNEOUS	VOLCANIC	FELSIC	TUFF		77.9	0.05	12.44					1.3		0.07	0.51	0.19		3	4.53	0.01											18		2
WIM JMVF 00-46		NAVDAT		A geochemical study on the behavior of rare earth and trace elements in the Otowi Member of the Bandelier Tuff, Jemez Mountains, New Mexico.	Thesis-or-Dissertation	Winters-Roger-Lee		40.25	-104.083	0.1	1.6	1.61	1.62	ICPMS	IGNEOUS	VOLCANIC	FELSIC	TUFF
WINJMVF00-48		NAVDAT		A geochemical study on the behavior of rare earth and trace elements in the Otowi Member of the Bandelier Tuff, Jemez Mountains, New Mexico.	Thesis-or-Dissertation	Winters-Roger-Lee		40.25	-104.083	0.1	1.6	1.61	1.62	XRF	IGNEOUS	VOLCANIC	FELSIC	TUFF		76.74	0.08	12.75					1.35		0.28	0.08	0.36		3.48	4.86	0.01											23		3
WINJMVF00-48		NAVDAT		A geochemical study on the behavior of rare earth and trace elements in the Otowi Member of the Bandelier Tuff, Jemez Mountains, New Mexico.	Thesis-or-Dissertation	Winters-Roger-Lee		40.25	-104.083	0.1	1.6	1.61	1.62	ICPMS	IGNEOUS	VOLCANIC	FELSIC	TUFF
WIM JMVF 00-50		NAVDAT		A geochemical study on the behavior of rare earth and trace elements in the Otowi Member of the Bandelier Tuff, Jemez Mountains, New Mexico.	Thesis-or-Dissertation	Winters-Roger-Lee		40.25	-104.083	0.1	1.6	1.61	1.62	XRF	IGNEOUS	VOLCANIC	FELSIC	TUFF		76.81	0.07	12.74					1.41		0.14	0.05	0.35		3.55	4.87	0.01											13		0
WIM JMVF 00-50		NAVDAT		A geochemical study on the behavior of rare earth and trace elements in the Otowi Member of the Bandelier Tuff, Jemez Mountains, New Mexico.	Thesis-or-Dissertation	Winters-Roger-Lee		40.25	-104.083	0.1	1.6	1.61	1.62	ICPMS	IGNEOUS	VOLCANIC	FELSIC	TUFF
WIM JMVF 00-51		NAVDAT		A geochemical study on the behavior of rare earth and trace elements in the Otowi Member of the Bandelier Tuff, Jemez Mountains, New Mexico.	Thesis-or-Dissertation	Winters-Roger-Lee		40.25	-104.083	0.1	1.6	1.61	1.62	XRF	IGNEOUS	VOLCANIC	FELSIC	TUFF		76.23	0.1	12.91					1.52		0.11	0.08	0.46		3.83	4.74	0.02											11		2
WIM JMVF 00-51		NAVDAT		A geochemical study on the behavior of rare earth and trace elements in the Otowi Member of the Bandelier Tuff, Jemez Mountains, New Mexico.	Thesis-or-Dissertation	Winters-Roger-Lee		40.25	-104.083	0.1	1.6	1.61	1.62	ICPMS	IGNEOUS	VOLCANIC	FELSIC	TUFF
WIM JMVF 00-52		NAVDAT		A geochemical study on the behavior of rare earth and trace elements in the Otowi Member of the Bandelier Tuff, Jemez Mountains, New Mexico.	Thesis-or-Dissertation	Winters-Roger-Lee		40.25	-104.083	0.1	1.6	1.61	1.62	XRF	IGNEOUS	VOLCANIC	FELSIC	TUFF		76.38	0.09	12.85					1.54		0.08	0.14	0.32		3.55	5.04	0.01											11		10
WIM JMVF 00-52		NAVDAT		A geochemical study on the behavior of rare earth and trace elements in the Otowi Member of the Bandelier Tuff, Jemez Mountains, New Mexico.	Thesis-or-Dissertation	Winters-Roger-Lee		40.25	-104.083	0.1	1.6	1.61	1.62	ICPMS	IGNEOUS	VOLCANIC	FELSIC	TUFF
WIN JM00-56		NAVDAT		A geochemical study on the behavior of rare earth and trace elements in the Otowi Member of the Bandelier Tuff, Jemez Mountains, New Mexico.	Thesis-or-Dissertation	Winters-Roger-Lee		40.25	-104.083	0.1	1.6	1.61	1.62	XRF	IGNEOUS	VOLCANIC	FELSIC	TUFF		76.61	0.08	12.74					1.35		0.18	0.1	0.39		3.72	4.81	0.01											13		2
WIN JM00-56		NAVDAT		A geochemical study on the behavior of rare earth and trace elements in the Otowi Member of the Bandelier Tuff, Jemez Mountains, New Mexico.	Thesis-or-Dissertation	Winters-Roger-Lee		40.25	-104.083	0.1	1.6	1.61	1.62	ICPMS	IGNEOUS	VOLCANIC	FELSIC	TUFF
WIM JMVF 00-58		NAVDAT		A geochemical study on the behavior of rare earth and trace elements in the Otowi Member of the Bandelier Tuff, Jemez Mountains, New Mexico.	Thesis-or-Dissertation	Winters-Roger-Lee		40.25	-104.083	0.1	1.6	1.61	1.62	XRF	IGNEOUS	VOLCANIC	FELSIC	TUFF		76.68	0.06	12.56					1.39		0.1	0.04	0.38		3.98	4.8	0.01											10		3
WIM JMVF 00-58		NAVDAT		A geochemical study on the behavior of rare earth and trace elements in the Otowi Member of the Bandelier Tuff, Jemez Mountains, New Mexico.	Thesis-or-Dissertation	Winters-Roger-Lee		40.25	-104.083	0.1	1.6	1.61	1.62	ICPMS	IGNEOUS	VOLCANIC	FELSIC	TUFF
WIM JMVF 00-61		NAVDAT		A geochemical study on the behavior of rare earth and trace elements in the Otowi Member of the Bandelier Tuff, Jemez Mountains, New Mexico.	Thesis-or-Dissertation	Winters-Roger-Lee		40.25	-104.083	0.1	1.6	1.61	1.62	XRF	IGNEOUS	VOLCANIC	FELSIC	TUFF		76.52	0.08	12.61					1.42		0.09	0.04	0.41		3.92	4.89	0.02											7		0
WIM JMVF 00-61		NAVDAT		A geochemical study on the behavior of rare earth and trace elements in the Otowi Member of the Bandelier Tuff, Jemez Mountains, New Mexico.	Thesis-or-Dissertation	Winters-Roger-Lee		40.25	-104.083	0.1	1.6	1.61	1.62	ICPMS	IGNEOUS	VOLCANIC	FELSIC	TUFF
WINJMVF 00-63Ac		NAVDAT		A geochemical study on the behavior of rare earth and trace elements in the Otowi Member of the Bandelier Tuff, Jemez Mountains, New Mexico.	Thesis-or-Dissertation	Winters-Roger-Lee		40.25	-104.083	0.1	1.6	1.61	1.62	XRF	IGNEOUS	VOLCANIC	FELSIC	TUFF		78.27	0.05	11.59					1.22		0.07	0.43	0.29		3.59	4.47	0.01											26		3
WIM JMVF 00-65		NAVDAT		A geochemical study on the behavior of rare earth and trace elements in the Otowi Member of the Bandelier Tuff, Jemez Mountains, New Mexico.	Thesis-or-Dissertation	Winters-Roger-Lee		40.25	-104.083	0.1	1.6	1.61	1.62	XRF	IGNEOUS	VOLCANIC	FELSIC	TUFF		76.74	0.06	12.52					1.36		0.1	0.03	0.38		3.92	4.89	0.01											9		1
WIM JMVF 00-65		NAVDAT		A geochemical study on the behavior of rare earth and trace elements in the Otowi Member of the Bandelier Tuff, Jemez Mountains, New Mexico.	Thesis-or-Dissertation	Winters-Roger-Lee		40.25	-104.083	0.1	1.6	1.61	1.62	ICPMS	IGNEOUS	VOLCANIC	FELSIC	TUFF
WIM JMVF 00-68		NAVDAT		A geochemical study on the behavior of rare earth and trace elements in the Otowi Member of the Bandelier Tuff, Jemez Mountains, New Mexico.	Thesis-or-Dissertation	Winters-Roger-Lee		40.25	-104.083	0.1	1.6	1.61	1.62	XRF	IGNEOUS	VOLCANIC	FELSIC	TUFF		76.92	0.15	12.15					1.66		0.08	0.23	0.56		3.57	4.67	0.01											12		6
WIM JMVF 00-68		NAVDAT		A geochemical study on the behavior of rare earth and trace elements in the Otowi Member of the Bandelier Tuff, Jemez Mountains, New Mexico.	Thesis-or-Dissertation	Winters-Roger-Lee		40.25	-104.083	0.1	1.6	1.61	1.62	ICPMS	IGNEOUS	VOLCANIC	FELSIC	TUFF
WIM JMVF 00-84		NAVDAT		A geochemical study on the behavior of rare earth and trace elements in the Otowi Member of the Bandelier Tuff, Jemez Mountains, New Mexico.	Thesis-or-Dissertation	Winters-Roger-Lee		40.25	-104.083	0.1	1.6	1.61	1.62	XRF	IGNEOUS	VOLCANIC	FELSIC	TUFF		76.4	0.05	12.36					1.29		0.09	0.04	0.6		3.81	5.35	0.02											9		3
WIM JMVF 00-84		NAVDAT		A geochemical study on the behavior of rare earth and trace elements in the Otowi Member of the Bandelier Tuff, Jemez Mountains, New Mexico.	Thesis-or-Dissertation	Winters-Roger-Lee		40.25	-104.083	0.1	1.6	1.61	1.62	ICPMS	IGNEOUS	VOLCANIC	FELSIC	TUFF
WIM JMVF 00-86		NAVDAT		A geochemical study on the behavior of rare earth and trace elements in the Otowi Member of the Bandelier Tuff, Jemez Mountains, New Mexico.	Thesis-or-Dissertation	Winters-Roger-Lee		40.25	-104.083	0.1	1.6	1.61	1.62	XRF	IGNEOUS	VOLCANIC	FELSIC	TUFF		76.72	0.23	11.84					1.97		0.08	0.29	0.87		3.49	4.46	0.05											10		1
WIM JMVF 00-86		NAVDAT		A geochemical study on the behavior of rare earth and trace elements in the Otowi Member of the Bandelier Tuff, Jemez Mountains, New Mexico.	Thesis-or-Dissertation	Winters-Roger-Lee		40.25	-104.083	0.1	1.6	1.61	1.62	ICPMS	IGNEOUS	VOLCANIC	FELSIC	TUFF
WIM JMVF 00-89		NAVDAT		A geochemical study on the behavior of rare earth and trace elements in the Otowi Member of the Bandelier Tuff, Jemez Mountains, New Mexico.	Thesis-or-Dissertation	Winters-Roger-Lee		40.25	-104.083	0.1	1.6	1.61	1.62	XRF	IGNEOUS	VOLCANIC	FELSIC	TUFF		79.65	0.05	10.94					1.09		0.05	0.33	0.24		2.92	4.72	0.01											23		0
WIM JMVF 00-89		NAVDAT		A geochemical study on the behavior of rare earth and trace elements in the Otowi Member of the Bandelier Tuff, Jemez Mountains, New Mexico.	Thesis-or-Dissertation	Winters-Roger-Lee		40.25	-104.083	0.1	1.6	1.61	1.62	ICPMS	IGNEOUS	VOLCANIC	FELSIC	TUFF
WIN JMVF 00-91		NAVDAT		A geochemical study on the behavior of rare earth and trace elements in the Otowi Member of the Bandelier Tuff, Jemez Mountains, New Mexico.	Thesis-or-Dissertation	Winters-Roger-Lee		40.25	-104.083	0.1	1.6	1.61	1.62	XRF	IGNEOUS	VOLCANIC	FELSIC	TUFF		76.22	0.26	12.02					1.97		0.06	0.37	0.93		3.38	4.73	0.06											5		3
WIN JMVF 00-91		NAVDAT		A geochemical study on the behavior of rare earth and trace elements in the Otowi Member of the Bandelier Tuff, Jemez Mountains, New Mexico.	Thesis-or-Dissertation	Winters-Roger-Lee		40.25	-104.083	0.1	1.6	1.61	1.62	ICPMS	IGNEOUS	VOLCANIC	FELSIC	TUFF
WIN JMVF 00-92		NAVDAT		A geochemical study on the behavior of rare earth and trace elements in the Otowi Member of the Bandelier Tuff, Jemez Mountains, New Mexico.	Thesis-or-Dissertation	Winters-Roger-Lee		40.25	-104.083	0.1	1.6	1.61	1.62	XRF	IGNEOUS	VOLCANIC	FELSIC	TUFF		77.38	0.05	12.32					1.18		0.05	0	0.16		2.98	5.87	0.01											9		0
WIN JMVF 00-92		NAVDAT		A geochemical study on the behavior of rare earth and trace elements in the Otowi Member of the Bandelier Tuff, Jemez Mountains, New Mexico.	Thesis-or-Dissertation	Winters-Roger-Lee		40.25	-104.083	0.1	1.6	1.61	1.62	ICPMS	IGNEOUS	VOLCANIC	FELSIC	TUFF
WIN JMVF 00-93		NAVDAT		A geochemical study on the behavior of rare earth and trace elements in the Otowi Member of the Bandelier Tuff, Jemez Mountains, New Mexico.	Thesis-or-Dissertation	Winters-Roger-Lee		40.25	-104.083	0.1	1.6	1.61	1.62	XRF	IGNEOUS	VOLCANIC	FELSIC	TUFF		76.4	0.07	12.25					1.19		0.05	0.06	0.45		3.23	6.29	0.02											3		0
WIN JMVF 00-93		NAVDAT		A geochemical study on the behavior of rare earth and trace elements in the Otowi Member of the Bandelier Tuff, Jemez Mountains, New Mexico.	Thesis-or-Dissertation	Winters-Roger-Lee		40.25	-104.083	0.1	1.6	1.61	1.62	ICPMS	IGNEOUS	VOLCANIC	FELSIC	TUFF
WIN JMVF 00-94		NAVDAT		A geochemical study on the behavior of rare earth and trace elements in the Otowi Member of the Bandelier Tuff, Jemez Mountains, New Mexico.	Thesis-or-Dissertation	Winters-Roger-Lee		40.25	-104.083	0.1	1.6	1.61	1.62	XRF	IGNEOUS	VOLCANIC	FELSIC	TUFF		76.96	0.08	12.35					1.2		0.04	0.06	0.5		2.83	5.96	0.03											4		3
WIN JMVF 00-94		NAVDAT		A geochemical study on the behavior of rare earth and trace elements in the Otowi Member of the Bandelier Tuff, Jemez Mountains, New Mexico.	Thesis-or-Dissertation	Winters-Roger-Lee		40.25	-104.083	0.1	1.6	1.61	1.62	ICPMS	IGNEOUS	VOLCANIC	FELSIC	TUFF
WIN JMVF 00-95 SDC A		NAVDAT		A geochemical study on the behavior of rare earth and trace elements in the Otowi Member of the Bandelier Tuff, Jemez Mountains, New Mexico.	Thesis-or-Dissertation	Winters-Roger-Lee		40.25	-104.083	0.1	1.6	1.61	1.62	ICPMS	IGNEOUS	VOLCANIC	FELSIC	TUFF
WIN JMVF 00-99 SDC B		NAVDAT		A geochemical study on the behavior of rare earth and trace elements in the Otowi Member of the Bandelier Tuff, Jemez Mountains, New Mexico.	Thesis-or-Dissertation	Winters-Roger-Lee		40.25	-104.083	0.1	1.6	1.61	1.62	XRF	IGNEOUS	VOLCANIC	FELSIC	TUFF		78.02	0.07	12.73					1.3		0.06	0.3	0.35		2.72	4.44	0.01											14		0
WIN JMVF 00-99 SDC B		NAVDAT		A geochemical study on the behavior of rare earth and trace elements in the Otowi Member of the Bandelier Tuff, Jemez Mountains, New Mexico.	Thesis-or-Dissertation	Winters-Roger-Lee		40.25	-104.083	0.1	1.6	1.61	1.62	ICPMS	IGNEOUS	VOLCANIC	FELSIC	TUFF
WIN JM 00-100 ot		NAVDAT		A geochemical study on the behavior of rare earth and trace elements in the Otowi Member of the Bandelier Tuff, Jemez Mountains, New Mexico.	Thesis-or-Dissertation	Winters-Roger-Lee		40.25	-104.083	0.1	1.6	1.61	1.62	XRF	IGNEOUS	VOLCANIC	FELSIC	TUFF		80.32	0.05	10.45					1.33		0.06	0.86	0.23		2.85	3.84	0											49		20
WIN JM 00-100 ot		NAVDAT		A geochemical study on the behavior of rare earth and trace elements in the Otowi Member of the Bandelier Tuff, Jemez Mountains, New Mexico.	Thesis-or-Dissertation	Winters-Roger-Lee		40.25	-104.083	0.1	1.6	1.61	1.62	ICPMS	IGNEOUS	VOLCANIC	FELSIC	TUFF
WIN JM 00-102 ot		NAVDAT		A geochemical study on the behavior of rare earth and trace elements in the Otowi Member of the Bandelier Tuff, Jemez Mountains, New Mexico.	Thesis-or-Dissertation	Winters-Roger-Lee		40.25	-104.083	0.1	1.6	1.61	1.62	XRF	IGNEOUS	VOLCANIC	FELSIC	TUFF		76.67	0.06	12.72					1.41		0.09	0.08	0.33		3.92	4.73	0.01											8		0
WIN JM 00-102 ot		NAVDAT		A geochemical study on the behavior of rare earth and trace elements in the Otowi Member of the Bandelier Tuff, Jemez Mountains, New Mexico.	Thesis-or-Dissertation	Winters-Roger-Lee		40.25	-104.083	0.1	1.6	1.61	1.62	ICPMS	IGNEOUS	VOLCANIC	FELSIC	TUFF
WIN JM 00-105 ot		NAVDAT		A geochemical study on the behavior of rare earth and trace elements in the Otowi Member of the Bandelier Tuff, Jemez Mountains, New Mexico.	Thesis-or-Dissertation	Winters-Roger-Lee		40.25	-104.083	0.1	1.6	1.61	1.62	XRF	IGNEOUS	VOLCANIC	FELSIC	TUFF		76.57	0.06	13.6					1.18		0.05	0.13	0.34		3.1	4.97	0.01											9		5
WIN JM 00-105 ot		NAVDAT		A geochemical study on the behavior of rare earth and trace elements in the Otowi Member of the Bandelier Tuff, Jemez Mountains, New Mexico.	Thesis-or-Dissertation	Winters-Roger-Lee		40.25	-104.083	0.1	1.6	1.61	1.62	ICPMS	IGNEOUS	VOLCANIC	FELSIC	TUFF
WIN JM 00-106 SDC B?		NAVDAT		A geochemical study on the behavior of rare earth and trace elements in the Otowi Member of the Bandelier Tuff, Jemez Mountains, New Mexico.	Thesis-or-Dissertation	Winters-Roger-Lee		40.25	-104.083	0.1	1.6	1.61	1.62	XRF	IGNEOUS	VOLCANIC	FELSIC	TUFF		77.02	0.07	12.56					1.19		0.05	0	0.26		3.62	5.22	0.01											6		4
WIN JM 00-106 SDC B?		NAVDAT		A geochemical study on the behavior of rare earth and trace elements in the Otowi Member of the Bandelier Tuff, Jemez Mountains, New Mexico.	Thesis-or-Dissertation	Winters-Roger-Lee		40.25	-104.083	0.1	1.6	1.61	1.62	ICPMS	IGNEOUS	VOLCANIC	FELSIC	TUFF
WIN JM 00-108		NAVDAT		A geochemical study on the behavior of rare earth and trace elements in the Otowi Member of the Bandelier Tuff, Jemez Mountains, New Mexico.	Thesis-or-Dissertation	Winters-Roger-Lee		40.25	-104.083	0.1	1.6	1.61	1.62	XRF	IGNEOUS	VOLCANIC	FELSIC	TUFF		76.47	0.08	12.64					1.31		0.07	0.08	0.34		3.57	5.45	0.01											8		7
WIN JM 00-108		NAVDAT		A geochemical study on the behavior of rare earth and trace elements in the Otowi Member of the Bandelier Tuff, Jemez Mountains, New Mexico.	Thesis-or-Dissertation	Winters-Roger-Lee		40.25	-104.083	0.1	1.6	1.61	1.62	ICPMS	IGNEOUS	VOLCANIC	FELSIC	TUFF
WIN JM 00-109		NAVDAT		A geochemical study on the behavior of rare earth and trace elements in the Otowi Member of the Bandelier Tuff, Jemez Mountains, New Mexico.	Thesis-or-Dissertation	Winters-Roger-Lee		40.25	-104.083	0.1	1.6	1.61	1.62	XRF	IGNEOUS	VOLCANIC	FELSIC	TUFF		76.93	0.06	12.28					1.22		0.07	0.03	0.3		3.7	5.41	0.01											8		4
WIN JM 00-109		NAVDAT		A geochemical study on the behavior of rare earth and trace elements in the Otowi Member of the Bandelier Tuff, Jemez Mountains, New Mexico.	Thesis-or-Dissertation	Winters-Roger-Lee		40.25	-104.083	0.1	1.6	1.61	1.62	ICPMS	IGNEOUS	VOLCANIC	FELSIC	TUFF
WIN JM 00-110		NAVDAT		A geochemical study on the behavior of rare earth and trace elements in the Otowi Member of the Bandelier Tuff, Jemez Mountains, New Mexico.	Thesis-or-Dissertation	Winters-Roger-Lee		40.25	-104.083	0.1	1.6	1.61	1.62	XRF	IGNEOUS	VOLCANIC	FELSIC	TUFF		76.17	0.06	12.73					1.39		0.08	0.07	0.33		4.06	5.1	0.01											10		0
WIN JM 00-110		NAVDAT		A geochemical study on the behavior of rare earth and trace elements in the Otowi Member of the Bandelier Tuff, Jemez Mountains, New Mexico.	Thesis-or-Dissertation	Winters-Roger-Lee		40.25	-104.083	0.1	1.6	1.61	1.62	ICPMS	IGNEOUS	VOLCANIC	FELSIC	TUFF
WIN JM 00-111		NAVDAT		A geochemical study on the behavior of rare earth and trace elements in the Otowi Member of the Bandelier Tuff, Jemez Mountains, New Mexico.	Thesis-or-Dissertation	Winters-Roger-Lee		40.25	-104.083	0.1	1.6	1.61	1.62	XRF	IGNEOUS	VOLCANIC	FELSIC	TUFF		76.82	0.05	12.38					1.19		0.07	0.01	0.29		4.01	5.16	0.01											6		2
WIN JM 00-111		NAVDAT		A geochemical study on the behavior of rare earth and trace elements in the Otowi Member of the Bandelier Tuff, Jemez Mountains, New Mexico.	Thesis-or-Dissertation	Winters-Roger-Lee		40.25	-104.083	0.1	1.6	1.61	1.62	ICPMS	IGNEOUS	VOLCANIC	FELSIC	TUFF
WIN JM 00-114		NAVDAT		A geochemical study on the behavior of rare earth and trace elements in the Otowi Member of the Bandelier Tuff, Jemez Mountains, New Mexico.	Thesis-or-Dissertation	Winters-Roger-Lee		40.25	-104.083	0.1	1.6	1.61	1.62	XRF	IGNEOUS	VOLCANIC	FELSIC	TUFF		78.22	0.05	11.67					1.19		0.07	0.14	0.26		3.61	4.78	0.01											17		0
WIN JM 00-114		NAVDAT		A geochemical study on the behavior of rare earth and trace elements in the Otowi Member of the Bandelier Tuff, Jemez Mountains, New Mexico.	Thesis-or-Dissertation	Winters-Roger-Lee		40.25	-104.083	0.1	1.6	1.61	1.62	ICPMS	IGNEOUS	VOLCANIC	FELSIC	TUFF
WIN JM 00-117		NAVDAT		A geochemical study on the behavior of rare earth and trace elements in the Otowi Member of the Bandelier Tuff, Jemez Mountains, New Mexico.	Thesis-or-Dissertation	Winters-Roger-Lee		40.25	-104.083	0.1	1.6	1.61	1.62	XRF	IGNEOUS	VOLCANIC	FELSIC	TUFF		72.25	0.52	14.01					2.64		0.09	0.71	1.38		3.92	4.43	0.05											3		4
WIN JM 00-117		NAVDAT		A geochemical study on the behavior of rare earth and trace elements in the Otowi Member of the Bandelier Tuff, Jemez Mountains, New Mexico.	Thesis-or-Dissertation	Winters-Roger-Lee		40.25	-104.083	0.1	1.6	1.61	1.62	ICPMS	IGNEOUS	VOLCANIC	FELSIC	TUFF
WIN JM 00-120		NAVDAT		A geochemical study on the behavior of rare earth and trace elements in the Otowi Member of the Bandelier Tuff, Jemez Mountains, New Mexico.	Thesis-or-Dissertation	Winters-Roger-Lee		40.25	-104.083	0.1	1.6	1.61	1.62	XRF	IGNEOUS	VOLCANIC	FELSIC	TUFF		76.44	0.17	12.77					1.38		0.06	0.22	0.5		3.38	5.06	0.01											6		0
WIN JM 00-120		NAVDAT		A geochemical study on the behavior of rare earth and trace elements in the Otowi Member of the Bandelier Tuff, Jemez Mountains, New Mexico.	Thesis-or-Dissertation	Winters-Roger-Lee		40.25	-104.083	0.1	1.6	1.61	1.62	ICPMS	IGNEOUS	VOLCANIC	FELSIC	TUFF
WIN JM00-123		NAVDAT		A geochemical study on the behavior of rare earth and trace elements in the Otowi Member of the Bandelier Tuff, Jemez Mountains, New Mexico.	Thesis-or-Dissertation	Winters-Roger-Lee		40.25	-104.083	0.1	1.6	1.61	1.62	XRF	IGNEOUS	VOLCANIC	FELSIC	TUFF		75.21	0.23	13.02					1.63		0.07	0.23	0.71		3.77	5.07	0.06											5		0
WIN JM00-123		NAVDAT		A geochemical study on the behavior of rare earth and trace elements in the Otowi Member of the Bandelier Tuff, Jemez Mountains, New Mexico.	Thesis-or-Dissertation	Winters-Roger-Lee		40.25	-104.083	0.1	1.6	1.61	1.62	ICPMS	IGNEOUS	VOLCANIC	FELSIC	TUFF
WIN JM00-124		NAVDAT		A geochemical study on the behavior of rare earth and trace elements in the Otowi Member of the Bandelier Tuff, Jemez Mountains, New Mexico.	Thesis-or-Dissertation	Winters-Roger-Lee		40.25	-104.083	0.1	1.6	1.61	1.62	XRF	IGNEOUS	VOLCANIC	FELSIC	TUFF		67.03	0.69	15.58					3.96		0.07	1.66	3.38		4.3	3.26	0.07											17		0
WIN JM00-124		NAVDAT		A geochemical study on the behavior of rare earth and trace elements in the Otowi Member of the Bandelier Tuff, Jemez Mountains, New Mexico.	Thesis-or-Dissertation	Winters-Roger-Lee		40.25	-104.083	0.1	1.6	1.61	1.62	ICPMS	IGNEOUS	VOLCANIC	FELSIC	TUFF
WIN JM00-125		NAVDAT		A geochemical study on the behavior of rare earth and trace elements in the Otowi Member of the Bandelier Tuff, Jemez Mountains, New Mexico.	Thesis-or-Dissertation	Winters-Roger-Lee		40.25	-104.083	0.1	1.6	1.61	1.62	XRF	IGNEOUS	VOLCANIC	FELSIC	TUFF		75.5	0.17	13.38					1.56		0.06	0.33	0.61		2.97	5.38	0.03											6		4
WIN JM00-125		NAVDAT		A geochemical study on the behavior of rare earth and trace elements in the Otowi Member of the Bandelier Tuff, Jemez Mountains, New Mexico.	Thesis-or-Dissertation	Winters-Roger-Lee		40.25	-104.083	0.1	1.6	1.61	1.62	ICPMS	IGNEOUS	VOLCANIC	FELSIC	TUFF
WIN JM00-126		NAVDAT		A geochemical study on the behavior of rare earth and trace elements in the Otowi Member of the Bandelier Tuff, Jemez Mountains, New Mexico.	Thesis-or-Dissertation	Winters-Roger-Lee		40.25	-104.083	0.1	1.6	1.61	1.62	XRF	IGNEOUS	VOLCANIC	FELSIC	TUFF		74.62	0.27	13.22					1.85		0.07	0.32	0.87		3.78	4.93	0.07											7		5
WIN JM00-126		NAVDAT		A geochemical study on the behavior of rare earth and trace elements in the Otowi Member of the Bandelier Tuff, Jemez Mountains, New Mexico.	Thesis-or-Dissertation	Winters-Roger-Lee		40.25	-104.083	0.1	1.6	1.61	1.62	ICPMS	IGNEOUS	VOLCANIC	FELSIC	TUFF
WIN JM00-129		NAVDAT		A geochemical study on the behavior of rare earth and trace elements in the Otowi Member of the Bandelier Tuff, Jemez Mountains, New Mexico.	Thesis-or-Dissertation	Winters-Roger-Lee		40.25	-104.083	0.1	1.6	1.61	1.62	XRF	IGNEOUS	VOLCANIC	FELSIC	TUFF		76.59	0.13	12.66					1.21		0.06	0.1	0.39		3.83	5	0.02											6		0
WIN JM00-129		NAVDAT		A geochemical study on the behavior of rare earth and trace elements in the Otowi Member of the Bandelier Tuff, Jemez Mountains, New Mexico.	Thesis-or-Dissertation	Winters-Roger-Lee		40.25	-104.083	0.1	1.6	1.61	1.62	ICPMS	IGNEOUS	VOLCANIC	FELSIC	TUFF
WIN JM00-130		NAVDAT		A geochemical study on the behavior of rare earth and trace elements in the Otowi Member of the Bandelier Tuff, Jemez Mountains, New Mexico.	Thesis-or-Dissertation	Winters-Roger-Lee		40.25	-104.083	0.1	1.6	1.61	1.62	XRF	IGNEOUS	VOLCANIC	FELSIC	TUFF		75.21	0.23	13.27					1.63		0.07	0.34	0.77		3.27	5.15	0.06											7		0
WIN JM00-130		NAVDAT		A geochemical study on the behavior of rare earth and trace elements in the Otowi Member of the Bandelier Tuff, Jemez Mountains, New Mexico.	Thesis-or-Dissertation	Winters-Roger-Lee		40.25	-104.083	0.1	1.6	1.61	1.62	ICPMS	IGNEOUS	VOLCANIC	FELSIC	TUFF
WIN JM00-135		NAVDAT		A geochemical study on the behavior of rare earth and trace elements in the Otowi Member of the Bandelier Tuff, Jemez Mountains, New Mexico.	Thesis-or-Dissertation	Winters-Roger-Lee		40.25	-104.083	0.1	1.6	1.61	1.62	XRF	IGNEOUS	VOLCANIC	FELSIC	TUFF		75.04	0.24	13.19					1.73		0.07	0.38	0.75		3.47	5.06	0.06											5		2
WIN JM00-135		NAVDAT		A geochemical study on the behavior of rare earth and trace elements in the Otowi Member of the Bandelier Tuff, Jemez Mountains, New Mexico.	Thesis-or-Dissertation	Winters-Roger-Lee		40.25	-104.083	0.1	1.6	1.61	1.62	ICPMS	IGNEOUS	VOLCANIC	FELSIC	TUFF
WIN JM00-138		NAVDAT		A geochemical study on the behavior of rare earth and trace elements in the Otowi Member of the Bandelier Tuff, Jemez Mountains, New Mexico.	Thesis-or-Dissertation	Winters-Roger-Lee		40.25	-104.083	0.1	1.6	1.61	1.62	XRF	IGNEOUS	VOLCANIC	FELSIC	TUFF		66.09	0.7	15.96					4.11		0.08	1.85	3.89		3.86	3.2	0.26											19		4
WIN JM00-138		NAVDAT		A geochemical study on the behavior of rare earth and trace elements in the Otowi Member of the Bandelier Tuff, Jemez Mountains, New Mexico.	Thesis-or-Dissertation	Winters-Roger-Lee		40.25	-104.083	0.1	1.6	1.61	1.62	ICPMS	IGNEOUS	VOLCANIC	FELSIC	TUFF
WIN JM00-139		NAVDAT		A geochemical study on the behavior of rare earth and trace elements in the Otowi Member of the Bandelier Tuff, Jemez Mountains, New Mexico.	Thesis-or-Dissertation	Winters-Roger-Lee		40.25	-104.083	0.1	1.6	1.61	1.62	XRF	IGNEOUS	VOLCANIC	FELSIC	TUFF		65.21	1.12	16.26					4.63		0.12	1.48	2.85		4.59	3.68	0.07											2		3
WIN JM00-139		NAVDAT		A geochemical study on the behavior of rare earth and trace elements in the Otowi Member of the Bandelier Tuff, Jemez Mountains, New Mexico.	Thesis-or-Dissertation	Winters-Roger-Lee		40.25	-104.083	0.1	1.6	1.61	1.62	ICPMS	IGNEOUS	VOLCANIC	FELSIC	TUFF
WIN JM00-140		NAVDAT		A geochemical study on the behavior of rare earth and trace elements in the Otowi Member of the Bandelier Tuff, Jemez Mountains, New Mexico.	Thesis-or-Dissertation	Winters-Roger-Lee		40.25	-104.083	0.1	1.6	1.61	1.62	XRF	IGNEOUS	VOLCANIC	FELSIC	TUFF		62.51	1.31	17.13					5.45		0.13	1.76	3.52		4.91	3.17	0.1											1		0
WIN JM00-140		NAVDAT		A geochemical study on the behavior of rare earth and trace elements in the Otowi Member of the Bandelier Tuff, Jemez Mountains, New Mexico.	Thesis-or-Dissertation	Winters-Roger-Lee		40.25	-104.083	0.1	1.6	1.61	1.62	ICPMS	IGNEOUS	VOLCANIC	FELSIC	TUFF
WIN JM00-142		NAVDAT		A geochemical study on the behavior of rare earth and trace elements in the Otowi Member of the Bandelier Tuff, Jemez Mountains, New Mexico.	Thesis-or-Dissertation	Winters-Roger-Lee		40.25	-104.083	0.1	1.6	1.61	1.62	XRF	IGNEOUS	VOLCANIC	FELSIC	TUFF		75.92	0.17	13.12					1.5		0.07	0.3	0.61		3.18	5.08	0.04											6		5
WIN JM00-142		NAVDAT		A geochemical study on the behavior of rare earth and trace elements in the Otowi Member of the Bandelier Tuff, Jemez Mountains, New Mexico.	Thesis-or-Dissertation	Winters-Roger-Lee		40.25	-104.083	0.1	1.6	1.61	1.62	ICPMS	IGNEOUS	VOLCANIC	FELSIC	TUFF
WIN JM00-143		NAVDAT		A geochemical study on the behavior of rare earth and trace elements in the Otowi Member of the Bandelier Tuff, Jemez Mountains, New Mexico.	Thesis-or-Dissertation	Winters-Roger-Lee		40.25	-104.083	0.1	1.6	1.61	1.62	XRF	IGNEOUS	VOLCANIC	FELSIC	TUFF		67.97	0.81	15.7					3.78		0.1	1.05	2.51		4.46	3.6	0.03											1		0
WIN JM00-143		NAVDAT		A geochemical study on the behavior of rare earth and trace elements in the Otowi Member of the Bandelier Tuff, Jemez Mountains, New Mexico.	Thesis-or-Dissertation	Winters-Roger-Lee		40.25	-104.083	0.1	1.6	1.61	1.62	ICPMS	IGNEOUS	VOLCANIC	FELSIC	TUFF
WIN JM00-145		NAVDAT		A geochemical study on the behavior of rare earth and trace elements in the Otowi Member of the Bandelier Tuff, Jemez Mountains, New Mexico.	Thesis-or-Dissertation	Winters-Roger-Lee		40.25	-104.083	0.1	1.6	1.61	1.62	XRF	IGNEOUS	VOLCANIC	FELSIC	TUFF		76.73	0.1	12.83					1.27		0.06	0.12	0.39		3.23	5.26	0.01											1		2
WIN JM00-145		NAVDAT		A geochemical study on the behavior of rare earth and trace elements in the Otowi Member of the Bandelier Tuff, Jemez Mountains, New Mexico.	Thesis-or-Dissertation	Winters-Roger-Lee		40.25	-104.083	0.1	1.6	1.61	1.62	ICPMS	IGNEOUS	VOLCANIC	FELSIC	TUFF
WIN JM00-146		NAVDAT		A geochemical study on the behavior of rare earth and trace elements in the Otowi Member of the Bandelier Tuff, Jemez Mountains, New Mexico.	Thesis-or-Dissertation	Winters-Roger-Lee		40.25	-104.083	0.1	1.6	1.61	1.62	XRF	IGNEOUS	VOLCANIC	FELSIC	TUFF		76.89	0.09	12.6					1.19		0.06	0.06	0.34		3.65	5.1	0.01											6		0
WIN JM00-146		NAVDAT		A geochemical study on the behavior of rare earth and trace elements in the Otowi Member of the Bandelier Tuff, Jemez Mountains, New Mexico.	Thesis-or-Dissertation	Winters-Roger-Lee		40.25	-104.083	0.1	1.6	1.61	1.62	ICPMS	IGNEOUS	VOLCANIC	FELSIC	TUFF
WIN JM00-150		NAVDAT		A geochemical study on the behavior of rare earth and trace elements in the Otowi Member of the Bandelier Tuff, Jemez Mountains, New Mexico.	Thesis-or-Dissertation	Winters-Roger-Lee		40.25	-104.083	0.1	1.6	1.61	1.62	XRF	IGNEOUS	VOLCANIC	FELSIC	TUFF		76.41	0.07	12.73					1.36		0.09	0.09	0.41		3.94	4.89	0.01											9		2
WIN JM00-150		NAVDAT		A geochemical study on the behavior of rare earth and trace elements in the Otowi Member of the Bandelier Tuff, Jemez Mountains, New Mexico.	Thesis-or-Dissertation	Winters-Roger-Lee		40.25	-104.083	0.1	1.6	1.61	1.62	ICPMS	IGNEOUS	VOLCANIC	FELSIC	TUFF
WIN JM00-155		NAVDAT		A geochemical study on the behavior of rare earth and trace elements in the Otowi Member of the Bandelier Tuff, Jemez Mountains, New Mexico.	Thesis-or-Dissertation	Winters-Roger-Lee		40.25	-104.083	0.1	1.6	1.61	1.62	XRF	IGNEOUS	VOLCANIC	FELSIC	TUFF		77.11	0.05	12.62					1.13		0.07	0.02	0.17		3.93	4.89	0.01											7		2
WIN JM00-155		NAVDAT		A geochemical study on the behavior of rare earth and trace elements in the Otowi Member of the Bandelier Tuff, Jemez Mountains, New Mexico.	Thesis-or-Dissertation	Winters-Roger-Lee		40.25	-104.083	0.1	1.6	1.61	1.62	ICPMS	IGNEOUS	VOLCANIC	FELSIC	TUFF
WIN JM00-157		NAVDAT		A geochemical study on the behavior of rare earth and trace elements in the Otowi Member of the Bandelier Tuff, Jemez Mountains, New Mexico.	Thesis-or-Dissertation	Winters-Roger-Lee		40.25	-104.083	0.1	1.6	1.61	1.62	XRF	IGNEOUS	VOLCANIC	FELSIC	TUFF		77.01	0.06	12.62					1.17		0.06	0	0.15		3.55	5.38	0.01											7		0
WIN JM00-157		NAVDAT		A geochemical study on the behavior of rare earth and trace elements in the Otowi Member of the Bandelier Tuff, Jemez Mountains, New Mexico.	Thesis-or-Dissertation	Winters-Roger-Lee		40.25	-104.083	0.1	1.6	1.61	1.62	ICPMS	IGNEOUS	VOLCANIC	FELSIC	TUFF
WIN JM00-158		NAVDAT		A geochemical study on the behavior of rare earth and trace elements in the Otowi Member of the Bandelier Tuff, Jemez Mountains, New Mexico.	Thesis-or-Dissertation	Winters-Roger-Lee		40.25	-104.083	0.1	1.6	1.61	1.62	XRF	IGNEOUS	VOLCANIC	FELSIC	TUFF		77.08	0.07	12.51					1.17		0.05	0.02	0.2		3.54	5.36	0.01											5		1
WIN JM00-158		NAVDAT		A geochemical study on the behavior of rare earth and trace elements in the Otowi Member of the Bandelier Tuff, Jemez Mountains, New Mexico.	Thesis-or-Dissertation	Winters-Roger-Lee		40.25	-104.083	0.1	1.6	1.61	1.62	ICPMS	IGNEOUS	VOLCANIC	FELSIC	TUFF
WIN JM 00-160		NAVDAT		A geochemical study on the behavior of rare earth and trace elements in the Otowi Member of the Bandelier Tuff, Jemez Mountains, New Mexico.	Thesis-or-Dissertation	Winters-Roger-Lee		40.25	-104.083	0.1	1.6	1.61	1.62	XRF	IGNEOUS	VOLCANIC	FELSIC	TUFF		74.69	0.09	12.7					1.5		0.06	0.55	1.18		3.52	5.69	0.02											10		4
WIN JM 00-160		NAVDAT		A geochemical study on the behavior of rare earth and trace elements in the Otowi Member of the Bandelier Tuff, Jemez Mountains, New Mexico.	Thesis-or-Dissertation	Winters-Roger-Lee		40.25	-104.083	0.1	1.6	1.61	1.62	ICPMS	IGNEOUS	VOLCANIC	FELSIC	TUFF
WIN JM 00-161		NAVDAT		A geochemical study on the behavior of rare earth and trace elements in the Otowi Member of the Bandelier Tuff, Jemez Mountains, New Mexico.	Thesis-or-Dissertation	Winters-Roger-Lee		40.25	-104.083	0.1	1.6	1.61	1.62	XRF	IGNEOUS	VOLCANIC	FELSIC	TUFF		77.44	0.09	12.33					1.22		0.05	0.02	0.34		3.65	4.84	0.02											4		0
WIN JM 00-161		NAVDAT		A geochemical study on the behavior of rare earth and trace elements in the Otowi Member of the Bandelier Tuff, Jemez Mountains, New Mexico.	Thesis-or-Dissertation	Winters-Roger-Lee		40.25	-104.083	0.1	1.6	1.61	1.62	ICPMS	IGNEOUS	VOLCANIC	FELSIC	TUFF
WIN JM 00-162		NAVDAT		A geochemical study on the behavior of rare earth and trace elements in the Otowi Member of the Bandelier Tuff, Jemez Mountains, New Mexico.	Thesis-or-Dissertation	Winters-Roger-Lee		40.25	-104.083	0.1	1.6	1.61	1.62	XRF	IGNEOUS	VOLCANIC	FELSIC	TUFF		72.64	0.33	14.28					2.34		0.09	0.42	0.97		3.59	5.29	0.04											8		1
WIN JM 00-162		NAVDAT		A geochemical study on the behavior of rare earth and trace elements in the Otowi Member of the Bandelier Tuff, Jemez Mountains, New Mexico.	Thesis-or-Dissertation	Winters-Roger-Lee		40.25	-104.083	0.1	1.6	1.61	1.62	ICPMS	IGNEOUS	VOLCANIC	FELSIC	TUFF
WIN JM 00-163		NAVDAT		A geochemical study on the behavior of rare earth and trace elements in the Otowi Member of the Bandelier Tuff, Jemez Mountains, New Mexico.	Thesis-or-Dissertation	Winters-Roger-Lee		40.25	-104.083	0.1	1.6	1.61	1.62	XRF	IGNEOUS	VOLCANIC	FELSIC	TUFF		77.89	0.1	11.75					1.17		0.05	0.18	0.62		3.33	4.91	0.02											5		3
WIN JM 00-163		NAVDAT		A geochemical study on the behavior of rare earth and trace elements in the Otowi Member of the Bandelier Tuff, Jemez Mountains, New Mexico.	Thesis-or-Dissertation	Winters-Roger-Lee		40.25	-104.083	0.1	1.6	1.61	1.62	ICPMS	IGNEOUS	VOLCANIC	FELSIC	TUFF
WIN JM 00-164		NAVDAT		A geochemical study on the behavior of rare earth and trace elements in the Otowi Member of the Bandelier Tuff, Jemez Mountains, New Mexico.	Thesis-or-Dissertation	Winters-Roger-Lee		40.25	-104.083	0.1	1.6	1.61	1.62	XRF	IGNEOUS	VOLCANIC	FELSIC	TUFF		74.74	0.13	14.29					1.88		0.1	0.17	0.4		2.93	5.32	0.04											11		25
WIN JM 00-164		NAVDAT		A geochemical study on the behavior of rare earth and trace elements in the Otowi Member of the Bandelier Tuff, Jemez Mountains, New Mexico.	Thesis-or-Dissertation	Winters-Roger-Lee		40.25	-104.083	0.1	1.6	1.61	1.62	ICPMS	IGNEOUS	VOLCANIC	FELSIC	TUFF
WIN JM 00-166		NAVDAT		A geochemical study on the behavior of rare earth and trace elements in the Otowi Member of the Bandelier Tuff, Jemez Mountains, New Mexico.	Thesis-or-Dissertation	Winters-Roger-Lee		40.25	-104.083	0.1	1.6	1.61	1.62	XRF	IGNEOUS	VOLCANIC	FELSIC	TUFF		77.29	0.07	12.33					1.05		0.04	0.01	0.35		3.7	5.14	0.01											6		1
WIN JM 00-166		NAVDAT		A geochemical study on the behavior of rare earth and trace elements in the Otowi Member of the Bandelier Tuff, Jemez Mountains, New Mexico.	Thesis-or-Dissertation	Winters-Roger-Lee		40.25	-104.083	0.1	1.6	1.61	1.62	ICPMS	IGNEOUS	VOLCANIC	FELSIC	TUFF
WIN JM00-167		NAVDAT		A geochemical study on the behavior of rare earth and trace elements in the Otowi Member of the Bandelier Tuff, Jemez Mountains, New Mexico.	Thesis-or-Dissertation	Winters-Roger-Lee		40.25	-104.083	0.1	1.6	1.61	1.62	XRF	IGNEOUS	VOLCANIC	FELSIC	TUFF		77.36	0.08	12.28					1.15		0.05	0	0.25		3.76	5.07	0.01											4		3
WIN JM00-167		NAVDAT		A geochemical study on the behavior of rare earth and trace elements in the Otowi Member of the Bandelier Tuff, Jemez Mountains, New Mexico.	Thesis-or-Dissertation	Winters-Roger-Lee		40.25	-104.083	0.1	1.6	1.61	1.62	ICPMS	IGNEOUS	VOLCANIC	FELSIC	TUFF
WIN JM 00-168		NAVDAT		A geochemical study on the behavior of rare earth and trace elements in the Otowi Member of the Bandelier Tuff, Jemez Mountains, New Mexico.	Thesis-or-Dissertation	Winters-Roger-Lee		40.25	-104.083	0.1	1.6	1.61	1.62	XRF	IGNEOUS	VOLCANIC	FELSIC	TUFF		76.98	0.07	12.13					1.11		0.05	0.27	0.59		3.21	5.56	0.02											4		3
WIN JM 00-168		NAVDAT		A geochemical study on the behavior of rare earth and trace elements in the Otowi Member of the Bandelier Tuff, Jemez Mountains, New Mexico.	Thesis-or-Dissertation	Winters-Roger-Lee		40.25	-104.083	0.1	1.6	1.61	1.62	ICPMS	IGNEOUS	VOLCANIC	FELSIC	TUFF
WIN JM 00-170		NAVDAT		A geochemical study on the behavior of rare earth and trace elements in the Otowi Member of the Bandelier Tuff, Jemez Mountains, New Mexico.	Thesis-or-Dissertation	Winters-Roger-Lee		40.25	-104.083	0.1	1.6	1.61	1.62	XRF	IGNEOUS	VOLCANIC	FELSIC	TUFF		77.47	0.07	12.41					1.1		0.05	0	0.26		3.37	5.24	0.02											5		2
WIN JM 00-170		NAVDAT		A geochemical study on the behavior of rare earth and trace elements in the Otowi Member of the Bandelier Tuff, Jemez Mountains, New Mexico.	Thesis-or-Dissertation	Winters-Roger-Lee		40.25	-104.083	0.1	1.6	1.61	1.62	ICPMS	IGNEOUS	VOLCANIC	FELSIC	TUFF
WIN JM 00-172		NAVDAT		A geochemical study on the behavior of rare earth and trace elements in the Otowi Member of the Bandelier Tuff, Jemez Mountains, New Mexico.	Thesis-or-Dissertation	Winters-Roger-Lee		40.25	-104.083	0.1	1.6	1.61	1.62	XRF	IGNEOUS	VOLCANIC	FELSIC	TUFF		65.08	0.78	16.12					4.64		0.1	2.1	3.91		4.4	2.8	0.09											20		4
WIN JM 00-172		NAVDAT		A geochemical study on the behavior of rare earth and trace elements in the Otowi Member of the Bandelier Tuff, Jemez Mountains, New Mexico.	Thesis-or-Dissertation	Winters-Roger-Lee		40.25	-104.083	0.1	1.6	1.61	1.62	ICPMS	IGNEOUS	VOLCANIC	FELSIC	TUFF
WIN JM 00-173		NAVDAT		A geochemical study on the behavior of rare earth and trace elements in the Otowi Member of the Bandelier Tuff, Jemez Mountains, New Mexico.	Thesis-or-Dissertation	Winters-Roger-Lee		40.25	-104.083	0.1	1.6	1.61	1.62	XRF	IGNEOUS	VOLCANIC	FELSIC	TUFF		77.15	0.09	12.43					1.18		0.05	0.03	0.38		3.72	4.96	0.02											5		4
WIN JM 00-173		NAVDAT		A geochemical study on the behavior of rare earth and trace elements in the Otowi Member of the Bandelier Tuff, Jemez Mountains, New Mexico.	Thesis-or-Dissertation	Winters-Roger-Lee		40.25	-104.083	0.1	1.6	1.61	1.62	ICPMS	IGNEOUS	VOLCANIC	FELSIC	TUFF
WIN JM 00-174		NAVDAT		A geochemical study on the behavior of rare earth and trace elements in the Otowi Member of the Bandelier Tuff, Jemez Mountains, New Mexico.	Thesis-or-Dissertation	Winters-Roger-Lee		40.25	-104.083	0.1	1.6	1.61	1.62	XRF	IGNEOUS	VOLCANIC	FELSIC	TUFF		76.94	0.05	12.39					1.34		0.09	0.05	0.41		4.3	4.43	0.01											10		0
WIN JM 00-174		NAVDAT		A geochemical study on the behavior of rare earth and trace elements in the Otowi Member of the Bandelier Tuff, Jemez Mountains, New Mexico.	Thesis-or-Dissertation	Winters-Roger-Lee		40.25	-104.083	0.1	1.6	1.61	1.62	ICPMS	IGNEOUS	VOLCANIC	FELSIC	TUFF
WIN JM 00-175		NAVDAT		A geochemical study on the behavior of rare earth and trace elements in the Otowi Member of the Bandelier Tuff, Jemez Mountains, New Mexico.	Thesis-or-Dissertation	Winters-Roger-Lee		40.25	-104.083	0.1	1.6	1.61	1.62	XRF	IGNEOUS	VOLCANIC	FELSIC	TUFF		76.79	0.05	12.38					1.32		0.08	0	0.37		4.4	4.6	0.01											9		0
WIN JM 00-175		NAVDAT		A geochemical study on the behavior of rare earth and trace elements in the Otowi Member of the Bandelier Tuff, Jemez Mountains, New Mexico.	Thesis-or-Dissertation	Winters-Roger-Lee		40.25	-104.083	0.1	1.6	1.61	1.62	ICPMS	IGNEOUS	VOLCANIC	FELSIC	TUFF
WIN JM 00-176		NAVDAT		A geochemical study on the behavior of rare earth and trace elements in the Otowi Member of the Bandelier Tuff, Jemez Mountains, New Mexico.	Thesis-or-Dissertation	Winters-Roger-Lee		40.25	-104.083	0.1	1.6	1.61	1.62	XRF	IGNEOUS	VOLCANIC	FELSIC	TUFF		76.65	0.05	12.51					1.32		0.09	0.02	0.36		4.34	4.66	0.01											10		1
WIN JM 00-176		NAVDAT		A geochemical study on the behavior of rare earth and trace elements in the Otowi Member of the Bandelier Tuff, Jemez Mountains, New Mexico.	Thesis-or-Dissertation	Winters-Roger-Lee		40.25	-104.083	0.1	1.6	1.61	1.62	ICPMS	IGNEOUS	VOLCANIC	FELSIC	TUFF
WIN JM 00-177		NAVDAT		A geochemical study on the behavior of rare earth and trace elements in the Otowi Member of the Bandelier Tuff, Jemez Mountains, New Mexico.	Thesis-or-Dissertation	Winters-Roger-Lee		40.25	-104.083	0.1	1.6	1.61	1.62	XRF	IGNEOUS	VOLCANIC	FELSIC	TUFF		76.95	0.05	12.36					1.31		0.09	0	0.32		4.27	4.64	0.01											9		0
WIN JM 00-177		NAVDAT		A geochemical study on the behavior of rare earth and trace elements in the Otowi Member of the Bandelier Tuff, Jemez Mountains, New Mexico.	Thesis-or-Dissertation	Winters-Roger-Lee		40.25	-104.083	0.1	1.6	1.61	1.62	ICPMS	IGNEOUS	VOLCANIC	FELSIC	TUFF
WIN JM 00-178		NAVDAT		A geochemical study on the behavior of rare earth and trace elements in the Otowi Member of the Bandelier Tuff, Jemez Mountains, New Mexico.	Thesis-or-Dissertation	Winters-Roger-Lee		40.25	-104.083	0.1	1.6	1.61	1.62	XRF	IGNEOUS	VOLCANIC	FELSIC	TUFF		77.23	0.05	12.31					1.21		0.07	0.03	0.34		4.12	4.63	0.01											7		0
WIN JM 00-178		NAVDAT		A geochemical study on the behavior of rare earth and trace elements in the Otowi Member of the Bandelier Tuff, Jemez Mountains, New Mexico.	Thesis-or-Dissertation	Winters-Roger-Lee		40.25	-104.083	0.1	1.6	1.61	1.62	ICPMS	IGNEOUS	VOLCANIC	FELSIC	TUFF
WIN JM00-180		NAVDAT		A geochemical study on the behavior of rare earth and trace elements in the Otowi Member of the Bandelier Tuff, Jemez Mountains, New Mexico.	Thesis-or-Dissertation	Winters-Roger-Lee		40.25	-104.083	0.1	1.6	1.61	1.62	XRF	IGNEOUS	VOLCANIC	FELSIC	TUFF		77.27	0.06	12.26					1.18		0.06	0.05	0.38		4.1	4.62	0.01											5		0
WIN JM00-180		NAVDAT		A geochemical study on the behavior of rare earth and trace elements in the Otowi Member of the Bandelier Tuff, Jemez Mountains, New Mexico.	Thesis-or-Dissertation	Winters-Roger-Lee		40.25	-104.083	0.1	1.6	1.61	1.62	ICPMS	IGNEOUS	VOLCANIC	FELSIC	TUFF
WIN JM00-181		NAVDAT		A geochemical study on the behavior of rare earth and trace elements in the Otowi Member of the Bandelier Tuff, Jemez Mountains, New Mexico.	Thesis-or-Dissertation	Winters-Roger-Lee		40.25	-104.083	0.1	1.6	1.61	1.62	XRF	IGNEOUS	VOLCANIC	FELSIC	TUFF		75.14	0.15	13.19					1.65		0.07	0.53	0.89		4.05	4.28	0.06											7		5
WIN JM00-181		NAVDAT		A geochemical study on the behavior of rare earth and trace elements in the Otowi Member of the Bandelier Tuff, Jemez Mountains, New Mexico.	Thesis-or-Dissertation	Winters-Roger-Lee		40.25	-104.083	0.1	1.6	1.61	1.62	ICPMS	IGNEOUS	VOLCANIC	FELSIC	TUFF
WIN JM00-182		NAVDAT		A geochemical study on the behavior of rare earth and trace elements in the Otowi Member of the Bandelier Tuff, Jemez Mountains, New Mexico.	Thesis-or-Dissertation	Winters-Roger-Lee		40.25	-104.083	0.1	1.6	1.61	1.62	XRF	IGNEOUS	VOLCANIC	FELSIC	TUFF		76.61	0.07	12.59					1.3		0.08	0.05	0.43		4.13	4.73	0.01											7		4
WIN JM00-182		NAVDAT		A geochemical study on the behavior of rare earth and trace elements in the Otowi Member of the Bandelier Tuff, Jemez Mountains, New Mexico.	Thesis-or-Dissertation	Winters-Roger-Lee		40.25	-104.083	0.1	1.6	1.61	1.62	ICPMS	IGNEOUS	VOLCANIC	FELSIC	TUFF
WIN JM00-184		NAVDAT		A geochemical study on the behavior of rare earth and trace elements in the Otowi Member of the Bandelier Tuff, Jemez Mountains, New Mexico.	Thesis-or-Dissertation	Winters-Roger-Lee		40.25	-104.083	0.1	1.6	1.61	1.62	XRF	IGNEOUS	VOLCANIC	FELSIC	TUFF		75	0.2	13.39					1.81		0.05	0.28	0.73		4	4.49	0.04											8		0
WIN JM00-184		NAVDAT		A geochemical study on the behavior of rare earth and trace elements in the Otowi Member of the Bandelier Tuff, Jemez Mountains, New Mexico.	Thesis-or-Dissertation	Winters-Roger-Lee		40.25	-104.083	0.1	1.6	1.61	1.62	ICPMS	IGNEOUS	VOLCANIC	FELSIC	TUFF
WIN JM00-197		NAVDAT		A geochemical study on the behavior of rare earth and trace elements in the Otowi Member of the Bandelier Tuff, Jemez Mountains, New Mexico.	Thesis-or-Dissertation	Winters-Roger-Lee		40.25	-104.083	0.1	1.6	1.61	1.62	XRF	IGNEOUS	VOLCANIC	FELSIC	TUFF		75.95	0.07	12.67					1.44		0.08	0.15	0.9		3.89	4.81	0.03											11		2
WIN JM00-197		NAVDAT		A geochemical study on the behavior of rare earth and trace elements in the Otowi Member of the Bandelier Tuff, Jemez Mountains, New Mexico.	Thesis-or-Dissertation	Winters-Roger-Lee		40.25	-104.083	0.1	1.6	1.61	1.62	ICPMS	IGNEOUS	VOLCANIC	FELSIC	TUFF
WIN JM00-198		NAVDAT		A geochemical study on the behavior of rare earth and trace elements in the Otowi Member of the Bandelier Tuff, Jemez Mountains, New Mexico.	Thesis-or-Dissertation	Winters-Roger-Lee		40.25	-104.083	0.1	1.6	1.61	1.62	XRF	IGNEOUS	VOLCANIC	FELSIC	TUFF		76.16	0.06	13.33					1.46		0.07	0.15	0.35		3.61	4.79	0.01											8		6
WIN JM00-198		NAVDAT		A geochemical study on the behavior of rare earth and trace elements in the Otowi Member of the Bandelier Tuff, Jemez Mountains, New Mexico.	Thesis-or-Dissertation	Winters-Roger-Lee		40.25	-104.083	0.1	1.6	1.61	1.62	ICPMS	IGNEOUS	VOLCANIC	FELSIC	TUFF
WIN JM00-199		NAVDAT		A geochemical study on the behavior of rare earth and trace elements in the Otowi Member of the Bandelier Tuff, Jemez Mountains, New Mexico.	Thesis-or-Dissertation	Winters-Roger-Lee		40.25	-104.083	0.1	1.6	1.61	1.62	XRF	IGNEOUS	VOLCANIC	FELSIC	TUFF		76.15	0.1	12.99					1.51		0.07	0.12	0.53		3.8	4.7	0.03											8		3
WIN JM00-199		NAVDAT		A geochemical study on the behavior of rare earth and trace elements in the Otowi Member of the Bandelier Tuff, Jemez Mountains, New Mexico.	Thesis-or-Dissertation	Winters-Roger-Lee		40.25	-104.083	0.1	1.6	1.61	1.62	ICPMS	IGNEOUS	VOLCANIC	FELSIC	TUFF
WIN JM00-200		NAVDAT		A geochemical study on the behavior of rare earth and trace elements in the Otowi Member of the Bandelier Tuff, Jemez Mountains, New Mexico.	Thesis-or-Dissertation	Winters-Roger-Lee		40.25	-104.083	0.1	1.6	1.61	1.62	XRF	IGNEOUS	VOLCANIC	FELSIC	TUFF		77.25	0.05	12.25					1.38		0.07	0.01	0.33		3.87	4.79	0.01											6		0
WIN JM00-200		NAVDAT		A geochemical study on the behavior of rare earth and trace elements in the Otowi Member of the Bandelier Tuff, Jemez Mountains, New Mexico.	Thesis-or-Dissertation	Winters-Roger-Lee		40.25	-104.083	0.1	1.6	1.61	1.62	ICPMS	IGNEOUS	VOLCANIC	FELSIC	TUFF
WIN JM00-203		NAVDAT		A geochemical study on the behavior of rare earth and trace elements in the Otowi Member of the Bandelier Tuff, Jemez Mountains, New Mexico.	Thesis-or-Dissertation	Winters-Roger-Lee		40.25	-104.083	0.1	1.6	1.61	1.62	XRF	IGNEOUS	VOLCANIC	FELSIC	TUFF		77.05	0.05	12.59					1.35		0.09	0	0.24		3.71	4.92	0.01											11		0
WIN JM00-203		NAVDAT		A geochemical study on the behavior of rare earth and trace elements in the Otowi Member of the Bandelier Tuff, Jemez Mountains, New Mexico.	Thesis-or-Dissertation	Winters-Roger-Lee		40.25	-104.083	0.1	1.6	1.61	1.62	ICPMS	IGNEOUS	VOLCANIC	FELSIC	TUFF
WIN JM00-205		NAVDAT		A geochemical study on the behavior of rare earth and trace elements in the Otowi Member of the Bandelier Tuff, Jemez Mountains, New Mexico.	Thesis-or-Dissertation	Winters-Roger-Lee		40.25	-104.083	0.1	1.6	1.61	1.62	XRF	IGNEOUS	VOLCANIC	FELSIC	TUFF		76.63	0.05	12.26					1.51		0.09	0.19	0.45		3.65	5.16	0.02											11		3
WIN JM00-205		NAVDAT		A geochemical study on the behavior of rare earth and trace elements in the Otowi Member of the Bandelier Tuff, Jemez Mountains, New Mexico.	Thesis-or-Dissertation	Winters-Roger-Lee		40.25	-104.083	0.1	1.6	1.61	1.62	ICPMS	IGNEOUS	VOLCANIC	FELSIC	TUFF
WIN JM00-206		NAVDAT		A geochemical study on the behavior of rare earth and trace elements in the Otowi Member of the Bandelier Tuff, Jemez Mountains, New Mexico.	Thesis-or-Dissertation	Winters-Roger-Lee		40.25	-104.083	0.1	1.6	1.61	1.62	XRF	IGNEOUS	VOLCANIC	FELSIC	TUFF		76.3	0.07	12.65					1.38		0.08	0.1	0.43		3.76	5.22	0.01											10		4
WIN JM00-206		NAVDAT		A geochemical study on the behavior of rare earth and trace elements in the Otowi Member of the Bandelier Tuff, Jemez Mountains, New Mexico.	Thesis-or-Dissertation	Winters-Roger-Lee		40.25	-104.083	0.1	1.6	1.61	1.62	ICPMS	IGNEOUS	VOLCANIC	FELSIC	TUFF
WIN JM00-209		NAVDAT		A geochemical study on the behavior of rare earth and trace elements in the Otowi Member of the Bandelier Tuff, Jemez Mountains, New Mexico.	Thesis-or-Dissertation	Winters-Roger-Lee		40.25	-104.083	0.1	1.6	1.61	1.62	XRF	IGNEOUS	VOLCANIC	FELSIC	TUFF		76.42	0.07	12.48					1.35		0.08	0.13	0.4		3.86	5.21	0.01											10		0
WIN JM00-209		NAVDAT		A geochemical study on the behavior of rare earth and trace elements in the Otowi Member of the Bandelier Tuff, Jemez Mountains, New Mexico.	Thesis-or-Dissertation	Winters-Roger-Lee		40.25	-104.083	0.1	1.6	1.61	1.62	ICPMS	IGNEOUS	VOLCANIC	FELSIC	TUFF
WIN JM00-211		NAVDAT		A geochemical study on the behavior of rare earth and trace elements in the Otowi Member of the Bandelier Tuff, Jemez Mountains, New Mexico.	Thesis-or-Dissertation	Winters-Roger-Lee		40.25	-104.083	0.1	1.6	1.61	1.62	XRF	IGNEOUS	VOLCANIC	FELSIC	TUFF		76.72	0.05	12.34					1.28		0.08	0.04	0.31		3.76	5.42	0.01											8		0
WIN JM00-211		NAVDAT		A geochemical study on the behavior of rare earth and trace elements in the Otowi Member of the Bandelier Tuff, Jemez Mountains, New Mexico.	Thesis-or-Dissertation	Winters-Roger-Lee		40.25	-104.083	0.1	1.6	1.61	1.62	ICPMS	IGNEOUS	VOLCANIC	FELSIC	TUFF
WIN JM00-214		NAVDAT		A geochemical study on the behavior of rare earth and trace elements in the Otowi Member of the Bandelier Tuff, Jemez Mountains, New Mexico.	Thesis-or-Dissertation	Winters-Roger-Lee		40.25	-104.083	0.1	1.6	1.61	1.62	XRF	IGNEOUS	VOLCANIC	FELSIC	TUFF		76.67	0.05	12.4					1.27		0.08	0.02	0.3		4.04	5.17	0.01											10		0
WIN JM00-214		NAVDAT		A geochemical study on the behavior of rare earth and trace elements in the Otowi Member of the Bandelier Tuff, Jemez Mountains, New Mexico.	Thesis-or-Dissertation	Winters-Roger-Lee		40.25	-104.083	0.1	1.6	1.61	1.62	ICPMS	IGNEOUS	VOLCANIC	FELSIC	TUFF
WIN JM00-215B		NAVDAT		A geochemical study on the behavior of rare earth and trace elements in the Otowi Member of the Bandelier Tuff, Jemez Mountains, New Mexico.	Thesis-or-Dissertation	Winters-Roger-Lee		40.25	-104.083	0.1	1.6	1.61	1.62	XRF	IGNEOUS	VOLCANIC	FELSIC	TUFF		76.61	0.05	12.31					1.27		0.08	0.08	0.37		3.63	5.6	0.01											7		4
WIN JM00-215B		NAVDAT		A geochemical study on the behavior of rare earth and trace elements in the Otowi Member of the Bandelier Tuff, Jemez Mountains, New Mexico.	Thesis-or-Dissertation	Winters-Roger-Lee		40.25	-104.083	0.1	1.6	1.61	1.62	ICPMS	IGNEOUS	VOLCANIC	FELSIC	TUFF
WIN JM00-215		NAVDAT		A geochemical study on the behavior of rare earth and trace elements in the Otowi Member of the Bandelier Tuff, Jemez Mountains, New Mexico.	Thesis-or-Dissertation	Winters-Roger-Lee		40.25	-104.083	0.1	1.6	1.61	1.62	XRF	IGNEOUS	VOLCANIC	FELSIC	TUFF		76.7	0.05	12.41					1.32		0.07	0.05	0.34		3.72	5.33	0											8		0
WIN JM00-215		NAVDAT		A geochemical study on the behavior of rare earth and trace elements in the Otowi Member of the Bandelier Tuff, Jemez Mountains, New Mexico.	Thesis-or-Dissertation	Winters-Roger-Lee		40.25	-104.083	0.1	1.6	1.61	1.62	ICPMS	IGNEOUS	VOLCANIC	FELSIC	TUFF
WIN JM00-216		NAVDAT		A geochemical study on the behavior of rare earth and trace elements in the Otowi Member of the Bandelier Tuff, Jemez Mountains, New Mexico.	Thesis-or-Dissertation	Winters-Roger-Lee		40.25	-104.083	0.1	1.6	1.61	1.62	XRF	IGNEOUS	VOLCANIC	FELSIC	TUFF		76.73	0.04	12.36					1.27		0.08	0	0.21		4.03	5.28	0											7		0
WIN JM00-216		NAVDAT		A geochemical study on the behavior of rare earth and trace elements in the Otowi Member of the Bandelier Tuff, Jemez Mountains, New Mexico.	Thesis-or-Dissertation	Winters-Roger-Lee		40.25	-104.083	0.1	1.6	1.61	1.62	ICPMS	IGNEOUS	VOLCANIC	FELSIC	TUFF
WIN JM00-217		NAVDAT		A geochemical study on the behavior of rare earth and trace elements in the Otowi Member of the Bandelier Tuff, Jemez Mountains, New Mexico.	Thesis-or-Dissertation	Winters-Roger-Lee		40.25	-104.083	0.1	1.6	1.61	1.62	XRF	IGNEOUS	VOLCANIC	FELSIC	TUFF		76.86	0.05	12.34					1.16		0.07	0.03	0.58		3.91	4.95	0.04											8		0
WIN JM00-217		NAVDAT		A geochemical study on the behavior of rare earth and trace elements in the Otowi Member of the Bandelier Tuff, Jemez Mountains, New Mexico.	Thesis-or-Dissertation	Winters-Roger-Lee		40.25	-104.083	0.1	1.6	1.61	1.62	ICPMS	IGNEOUS	VOLCANIC	FELSIC	TUFF
WIN JM00-218		NAVDAT		A geochemical study on the behavior of rare earth and trace elements in the Otowi Member of the Bandelier Tuff, Jemez Mountains, New Mexico.	Thesis-or-Dissertation	Winters-Roger-Lee		40.25	-104.083	0.1	1.6	1.61	1.62	XRF	IGNEOUS	VOLCANIC	FELSIC	TUFF		77.22	0.05	12.16					1.19		0.08	0.02	0.24		3.85	5.18	0											6		0
WIN JM00-218		NAVDAT		A geochemical study on the behavior of rare earth and trace elements in the Otowi Member of the Bandelier Tuff, Jemez Mountains, New Mexico.	Thesis-or-Dissertation	Winters-Roger-Lee		40.25	-104.083	0.1	1.6	1.61	1.62	ICPMS	IGNEOUS	VOLCANIC	FELSIC	TUFF
WIN JM00-219		NAVDAT		A geochemical study on the behavior of rare earth and trace elements in the Otowi Member of the Bandelier Tuff, Jemez Mountains, New Mexico.	Thesis-or-Dissertation	Winters-Roger-Lee		40.25	-104.083	0.1	1.6	1.61	1.62	XRF	IGNEOUS	VOLCANIC	FELSIC	TUFF		76.93	0.05	12.3					1.22		0.08	0.01	0.26		3.88	5.26	0											6		0
WIN JM00-219		NAVDAT		A geochemical study on the behavior of rare earth and trace elements in the Otowi Member of the Bandelier Tuff, Jemez Mountains, New Mexico.	Thesis-or-Dissertation	Winters-Roger-Lee		40.25	-104.083	0.1	1.6	1.61	1.62	ICPMS	IGNEOUS	VOLCANIC	FELSIC	TUFF
85L-18C		NAVDAT		Analysis of geologic materials by wavelength-dispersive X-ray fluorescence spectrometry.	U. S. Geological Survey Bulletin. Pages E1-E19. 1987. .	Taggart-Joseph-E Jr.; Lindsay-J-R; Scott-B-A; Vivit-Davison-V; Bartel-A-J; Stewart-Kathleen-C		37.937	-107.064	0.0001	25.9	26.5	27.1	XRF	IGNEOUS	VOLCANIC	FELSIC	TUFF		70.98	0.341474	15.055		2.0388					0.0502167	0.461994	1.51654		4.16799	4.94132	0.0903901		0.43
85L-18C		NAVDAT		The determination of 30 elements in geological materials by energy dispersion X-ray fluorescence spectrometry.	Open-File Report - U. S. Geological Survey. Pages U1-U11. 2002. .	Siems-David-F		37.937	-107.064	0.0001	25.9	26.5	27.1	XRF	IGNEOUS	VOLCANIC	FELSIC	TUFF																												< 10
SJ-85-60		NAVDAT		Analysis of geologic materials by wavelength-dispersive X-ray fluorescence spectrometry.	U. S. Geological Survey Bulletin. Pages E1-E19. 1987. .	Taggart-Joseph-E Jr.; Lindsay-J-R; Scott-B-A; Vivit-Davison-V; Bartel-A-J; Stewart-Kathleen-C		38.079	-107.007	0.0001	26.1	26.6	27	XRF	IGNEOUS	VOLCANIC	FELSIC	TUFF		72.39	0.26237	14.2883		2.0443					0	0.874568	2.87514		1.50863	5.01783	0.0765247		8.47
SJ-85-60		NAVDAT		The determination of 30 elements in geological materials by energy dispersion X-ray fluorescence spectrometry.	Open-File Report - U. S. Geological Survey. Pages U1-U11. 2002. .	Siems-David-F		38.079	-107.007	0.0001	26.1	26.6	27	XRF	IGNEOUS	VOLCANIC	FELSIC	TUFF																												6		12
98L-12-A		NAVDAT		Analysis of geologic materials by wavelength-dispersive X-ray fluorescence spectrometry.	U. S. Geological Survey Bulletin. Pages E1-E19. 1987. .	Taggart-Joseph-E Jr.; Lindsay-J-R; Scott-B-A; Vivit-Davison-V; Bartel-A-J; Stewart-Kathleen-C		37.829	-106.891	0.0001	27.25	27.35	27.45	XRF	IGNEOUS	VOLCANIC	FELSIC	TUFF		73.84	0.231043	13.4765		1.72204					0.0482623	0.348104	1.02583		2.26217	6.41888	0.0421011		2.6
98L-12-A		NAVDAT		The determination of 30 elements in geological materials by energy dispersion X-ray fluorescence spectrometry.	Open-File Report - U. S. Geological Survey. Pages U1-U11. 2002. .	Siems-David-F		37.829	-106.891	0.0001	27.25	27.35	27.45	XRF	IGNEOUS	VOLCANIC	FELSIC	TUFF																												< 10		21
98L-12-B		NAVDAT		Analysis of geologic materials by wavelength-dispersive X-ray fluorescence spectrometry.	U. S. Geological Survey Bulletin. Pages E1-E19. 1987. .	Taggart-Joseph-E Jr.; Lindsay-J-R; Scott-B-A; Vivit-Davison-V; Bartel-A-J; Stewart-Kathleen-C		37.829	-106.891	0.0001	27.25	27.35	27.45	XRF	IGNEOUS	VOLCANIC	FELSIC	TUFF		75.6	0.225635	13.334		1.13331					0.0112818	0.29948	0.587678		2.51994	5.95267	0.0358965		2.49
98L-12-B		NAVDAT		The determination of 30 elements in geological materials by energy dispersion X-ray fluorescence spectrometry.	Open-File Report - U. S. Geological Survey. Pages U1-U11. 2002. .	Siems-David-F		37.829	-106.891	0.0001	27.25	27.35	27.45	XRF	IGNEOUS	VOLCANIC	FELSIC	TUFF																												< 10		15
98L-12-C		NAVDAT		Analysis of geologic materials by wavelength-dispersive X-ray fluorescence spectrometry.	U. S. Geological Survey Bulletin. Pages E1-E19. 1987. .	Taggart-Joseph-E Jr.; Lindsay-J-R; Scott-B-A; Vivit-Davison-V; Bartel-A-J; Stewart-Kathleen-C		37.829	-106.891	0.0001	27.25	27.35	27.45	XRF	IGNEOUS	VOLCANIC	FELSIC	TUFF		74.36	0.232998	13.3337		1.48601					0.0600618	0.288918	1.3224		2.14255	6.07142	0.0383153		3.41
98L-12-C		NAVDAT		The determination of 30 elements in geological materials by energy dispersion X-ray fluorescence spectrometry.	Open-File Report - U. S. Geological Survey. Pages U1-U11. 2002. .	Siems-David-F		37.829	-106.891	0.0001	27.25	27.35	27.45	XRF	IGNEOUS	VOLCANIC	FELSIC	TUFF																												< 10		13
98L-13-A		NAVDAT		Analysis of geologic materials by wavelength-dispersive X-ray fluorescence spectrometry.	U. S. Geological Survey Bulletin. Pages E1-E19. 1987. .	Taggart-Joseph-E Jr.; Lindsay-J-R; Scott-B-A; Vivit-Davison-V; Bartel-A-J; Stewart-Kathleen-C		37.817	-106.886	0.0001	27.25	27.35	27.45	XRF	IGNEOUS	VOLCANIC	FELSIC	TUFF		73.89	0.246758	13.1676		1.78694					0.0493516	0.391728	1.01582		2.30204	6.05688	0.0442108		2.71
98L-13-A		NAVDAT		The determination of 30 elements in geological materials by energy dispersion X-ray fluorescence spectrometry.	Open-File Report - U. S. Geological Survey. Pages U1-U11. 2002. .	Siems-David-F		37.817	-106.886	0.0001	27.25	27.35	27.45	XRF	IGNEOUS	VOLCANIC	FELSIC	TUFF																												< 10		11
98L-13-B		NAVDAT		Analysis of geologic materials by wavelength-dispersive X-ray fluorescence spectrometry.	U. S. Geological Survey Bulletin. Pages E1-E19. 1987. .	Taggart-Joseph-E Jr.; Lindsay-J-R; Scott-B-A; Vivit-Davison-V; Bartel-A-J; Stewart-Kathleen-C		37.817	-106.886	0.0001	27.25	27.35	27.45	XRF	IGNEOUS	VOLCANIC	FELSIC	TUFF		74.75	0.211654	13.0075		1.60385					0.0236313	0.35036	0.582563		2.15559	6.10304	0.0328783		2.64
98L-13-B		NAVDAT		The determination of 30 elements in geological materials by energy dispersion X-ray fluorescence spectrometry.	Open-File Report - U. S. Geological Survey. Pages U1-U11. 2002. .	Siems-David-F		37.817	-106.886	0.0001	27.25	27.35	27.45	XRF	IGNEOUS	VOLCANIC	FELSIC	TUFF																												< 10		13
98L-13-C		NAVDAT		Analysis of geologic materials by wavelength-dispersive X-ray fluorescence spectrometry.	U. S. Geological Survey Bulletin. Pages E1-E19. 1987. .	Taggart-Joseph-E Jr.; Lindsay-J-R; Scott-B-A; Vivit-Davison-V; Bartel-A-J; Stewart-Kathleen-C		37.817	-106.886	0.0001	27.25	27.35	27.45	XRF	IGNEOUS	VOLCANIC	FELSIC	TUFF		76.15	0.228865	13.2331		0.686596					0.00821042	0.25247	0.506993		2.20963	6.19887	0.0215524		2.55
98L-13-C		NAVDAT		The determination of 30 elements in geological materials by energy dispersion X-ray fluorescence spectrometry.	Open-File Report - U. S. Geological Survey. Pages U1-U11. 2002. .	Siems-David-F		37.817	-106.886	0.0001	27.25	27.35	27.45	XRF	IGNEOUS	VOLCANIC	FELSIC	TUFF																												< 10		13
SD2-1121		NAVDAT		Instrumental neutron activation by abbreviated count.	Open-File Report - U. S. Geological Survey. Pages Y1-Y9. 2002. .	Budahn-James-R; Wandless-Gregory-A		37.929	-106.943	0.0001	27.25	27.35	27.45	INAA	IGNEOUS	VOLCANIC	FELSIC	TUFF																												5.41	1.93
SD2-1121		NAVDAT		Analysis of geologic materials by wavelength-dispersive X-ray fluorescence spectrometry.	U. S. Geological Survey Bulletin. Pages E1-E19. 1987. .	Taggart-Joseph-E Jr.; Lindsay-J-R; Scott-B-A; Vivit-Davison-V; Bartel-A-J; Stewart-Kathleen-C		37.929	-106.943	0.0001	27.25	27.35	27.45	XRF	IGNEOUS	VOLCANIC	FELSIC	TUFF		76.54	0.239729	12.5805		2.00121					0.0625379	0.635802	2.15756		0.990184	5.0343	0.0521149		4.07
SD2-1121		NAVDAT		The determination of 30 elements in geological materials by energy dispersion X-ray fluorescence spectrometry.	Open-File Report - U. S. Geological Survey. Pages U1-U11. 2002. .	Siems-David-F		37.929	-106.943	0.0001	27.25	27.35	27.45	XRF	IGNEOUS	VOLCANIC	FELSIC	TUFF
00L-23-A		NAVDAT		Analysis of geologic materials by wavelength-dispersive X-ray fluorescence spectrometry.	U. S. Geological Survey Bulletin. Pages E1-E19. 1987. .	Taggart-Joseph-E Jr.; Lindsay-J-R; Scott-B-A; Vivit-Davison-V; Bartel-A-J; Stewart-Kathleen-C		38.21	-106.607	0.0001	30	33	36	XRF	IGNEOUS	VOLCANIC	FELSIC	TUFF		72.28	0.242631	14.7601		1.49623					0.0606579	0.151645	0.748114		4.21572	5.52998	0.0909868		1.08
00L-23-A		NAVDAT		The determination of 30 elements in geological materials by energy dispersion X-ray fluorescence spectrometry.	Open-File Report - U. S. Geological Survey. Pages U1-U11. 2002. .	Siems-David-F		38.21	-106.607	0.0001	30	33	36	XRF	IGNEOUS	VOLCANIC	FELSIC	TUFF																												< 2		3
00L-24		NAVDAT		Analysis of geologic materials by wavelength-dispersive X-ray fluorescence spectrometry.	U. S. Geological Survey Bulletin. Pages E1-E19. 1987. .	Taggart-Joseph-E Jr.; Lindsay-J-R; Scott-B-A; Vivit-Davison-V; Bartel-A-J; Stewart-Kathleen-C		38.207	-106.607	0.0001	30	33	36	XRF	IGNEOUS	VOLCANIC	FELSIC	TUFF		72.41	0.222186	14.7451		1.37351					0.0706955	< 0.1	0.656458		4.39322	5.65564	0.0807949		0.98
00L-24		NAVDAT		The determination of 30 elements in geological materials by energy dispersion X-ray fluorescence spectrometry.	Open-File Report - U. S. Geological Survey. Pages U1-U11. 2002. .	Siems-David-F		38.207	-106.607	0.0001	30	33	36	XRF	IGNEOUS	VOLCANIC	FELSIC	TUFF																												2		< 2
tc89-12		NAVDAT		The Cougar Point Tuff; implications for thermochemical zonation andlongevity of high-temperature, large-volume silicic magmas of theMiocene Yellowstone Hotspot	Journal of Petrology, vol.45, no.1, pp.27-58, Jan 2004	Cathey, Henrietta E; Nash, Barbara P		41.96	-115.66	0.1	12.64	12.67	12.7	INAA	IGNEOUS	VOLCANIC	FELSIC	TUFF																													1.8
tc89-12		NAVDAT		The Cougar Point Tuff; implications for thermochemical zonation andlongevity of high-temperature, large-volume silicic magmas of theMiocene Yellowstone Hotspot	Journal of Petrology, vol.45, no.1, pp.27-58, Jan 2004	Cathey, Henrietta E; Nash, Barbara P		41.96	-115.66	0.1	12.64	12.67	12.7	XRF	IGNEOUS	VOLCANIC	FELSIC	TUFF						1.31							0.49														170
tc89-18a		NAVDAT		The Cougar Point Tuff; implications for thermochemical zonation andlongevity of high-temperature, large-volume silicic magmas of theMiocene Yellowstone Hotspot	Journal of Petrology, vol.45, no.1, pp.27-58, Jan 2004	Cathey, Henrietta E; Nash, Barbara P		41.94	-115.42	0.1	12.03	12.07	12.11	INAA	IGNEOUS	VOLCANIC	FELSIC	TUFF																													2.5
tc89-18a		NAVDAT		The Cougar Point Tuff; implications for thermochemical zonation andlongevity of high-temperature, large-volume silicic magmas of theMiocene Yellowstone Hotspot	Journal of Petrology, vol.45, no.1, pp.27-58, Jan 2004	Cathey, Henrietta E; Nash, Barbara P		41.94	-115.42	0.1	12.03	12.07	12.11	XRF	IGNEOUS	VOLCANIC	FELSIC	TUFF						1.63							0.53														185
brv93-429		NAVDAT		The Cougar Point Tuff; implications for thermochemical zonation andlongevity of high-temperature, large-volume silicic magmas of theMiocene Yellowstone Hotspot	Journal of Petrology, vol.45, no.1, pp.27-58, Jan 2004	Cathey, Henrietta E; Nash, Barbara P		41.96	-115.66	0.1	10.62	11.8	12.98	INAA	IGNEOUS	VOLCANIC	FELSIC	TUFF																													3
brv93-429		NAVDAT		The Cougar Point Tuff; implications for thermochemical zonation andlongevity of high-temperature, large-volume silicic magmas of theMiocene Yellowstone Hotspot	Journal of Petrology, vol.45, no.1, pp.27-58, Jan 2004	Cathey, Henrietta E; Nash, Barbara P		41.96	-115.66	0.1	10.62	11.8	12.98	XRF	IGNEOUS	VOLCANIC	FELSIC	TUFF						1.66							0.55														205
tc89-25a		NAVDAT		The Cougar Point Tuff; implications for thermochemical zonation andlongevity of high-temperature, large-volume silicic magmas of theMiocene Yellowstone Hotspot	Journal of Petrology, vol.45, no.1, pp.27-58, Jan 2004	Cathey, Henrietta E; Nash, Barbara P		41.96	-115.66	0.1	10.431	11.59	12.749	INAA	IGNEOUS	VOLCANIC	FELSIC	TUFF																													2.5
tc89-25a		NAVDAT		The Cougar Point Tuff; implications for thermochemical zonation andlongevity of high-temperature, large-volume silicic magmas of theMiocene Yellowstone Hotspot	Journal of Petrology, vol.45, no.1, pp.27-58, Jan 2004	Cathey, Henrietta E; Nash, Barbara P		41.96	-115.66	0.1	10.431	11.59	12.749	XRF	IGNEOUS	VOLCANIC	FELSIC	TUFF						1.61							0.5														165
brv93-431a		NAVDAT		The Cougar Point Tuff; implications for thermochemical zonation andlongevity of high-temperature, large-volume silicic magmas of theMiocene Yellowstone Hotspot	Journal of Petrology, vol.45, no.1, pp.27-58, Jan 2004	Cathey, Henrietta E; Nash, Barbara P		41.96	-115.66	0.1	10.179	11.31	12.441	INAA	IGNEOUS	VOLCANIC	FELSIC	TUFF																													2.6
brv93-431a		NAVDAT		The Cougar Point Tuff; implications for thermochemical zonation andlongevity of high-temperature, large-volume silicic magmas of theMiocene Yellowstone Hotspot	Journal of Petrology, vol.45, no.1, pp.27-58, Jan 2004	Cathey, Henrietta E; Nash, Barbara P		41.96	-115.66	0.1	10.179	11.31	12.441	XRF	IGNEOUS	VOLCANIC	FELSIC	TUFF						1.63							0.55														185
wjr93-538		NAVDAT		The Cougar Point Tuff; implications for thermochemical zonation andlongevity of high-temperature, large-volume silicic magmas of theMiocene Yellowstone Hotspot	Journal of Petrology, vol.45, no.1, pp.27-58, Jan 2004	Cathey, Henrietta E; Nash, Barbara P		41.94	-115.42	0.1	10.071	11.19	12.309	INAA	IGNEOUS	VOLCANIC	FELSIC	TUFF																													2.7
wjr93-538		NAVDAT		The Cougar Point Tuff; implications for thermochemical zonation andlongevity of high-temperature, large-volume silicic magmas of theMiocene Yellowstone Hotspot	Journal of Petrology, vol.45, no.1, pp.27-58, Jan 2004	Cathey, Henrietta E; Nash, Barbara P		41.94	-115.42	0.1	10.071	11.19	12.309	XRF	IGNEOUS	VOLCANIC	FELSIC	TUFF						1.9							0.57														195
[truncated: 9,123 more rows]
[truncated: 105 more columns]

## Sheet: References
References
AUTHOR	YEAR	TITLE	JOURNAL
[truncated: 981 more rows]
