# Supplementary material for: Basic chemical compositions combination rules and quantitative criterion of red beds
Source: Copernicus journal article supplement (doi:10.5194/egusphere-2023-2590), 2024-01-29
Supplement: Supplementary file 12 [file Supplementary Table 2-red beds-chemical compositions.xlsx]

## Sheet: Sheet1
No.	Chemical compositions /%																references
	Na2O	K2O	Fe2O3	FeO	TFe2O3	Al2O3	SiO2	MnO	MgO	CaO	TiO2	P2O5	Cr2O3	others	total	remark
1																	Jun Zhang, Kai Huang, Jingwen Su, Yunfeng Li, Bo Kang, Fusheng Cha. Evolution of basic properties of red bed soft rocks with burial depth. Journal of Hefei University of Technology (Natural Science), 2022, 45(11): 1558-62. (in Chinese)
2		3.52	7.85		7.85	19.75	58.67		3	5.08				2.13	100		Teng Pang. Study on deterioration mechanism and deformationInstability model of red layer slope in central yunnan under multi-field coupling. Southwest University of Science and Technology, 2022. (in Chinese)
		3	6.97		6.97	18.85	60.62		2.8	5.29				2.47	100
		3.99	7.01		7.01	23.85	60.78		1.98	0.57				1.82	100
		3.07	7.02		7.02	22.66	61.26		2.16	1.69				2.14	100
3	9.087	1.724			0.454	4.488	35.662	0.011	0.214	0.504	0.108	0.256	4.454		56.962		Xi Luo, Zhijun Yang, Ke Zhang, Hanyu Wang, Hengheng Du, Wang He. A mineralogical study on the genesis of red color of the Danxia Mountain in Guangdong Province. Acta Mineralogica Sinica, 2021, 41(06): 704-712. (in Chinese)
	0.3	0.011			0.04	0.019	90.245		0.012	0.069		0.042	0.99		91.729
	0.212	0.58			5.47	8.66	15.248	0.089	2.355	0.313	0.068	0.038	2.207		35.242
	0.086	1.841			4.185	20.428	26.26	0.004	4.512	0.217	0.032	0.027	0.764		58.356
	0.017	1.311			0.575	3.784	70.556	0.005	0.212	0.062	0.083	0.002	1.396		78.004
	0.186	0.26			0.181	2.081	79.733	0.015	0.124	0.28	0.004	0.136	6.353		89.352
	0.515	5.693			1.611	30.88	41.621	0.016	2.128	0.471	0.043	0.088	1.477		84.542
	0.337	7.824			1.501	31.174	45.109	0.014	1.158	0.194		0.031	1.6		88.942
	0.541	4.434			1.111	21.355	37.496	0.026	0.889	0.396	0.024		1.894		68.166
	0.226	1.528			1.593	28.572	42.64	0.021	4.095	0.779	0.067	0.027	0.357		79.905
	0.213	1.191			1.263	32.928	46.677		4.487	0.807	0.191		0.131		87.886
	0.243	1.594			1.772	30.504	47.949	0.033	6.667	1.087	0.137		0.123		90.109
	0.292	3.618			3.037	26.013	48.734	0.014	5.592	0.933	0.073	0.024	0.335		88.666
	0.299	2.507			2.459	19.21	65.424	0.014	3.422	0.606	0.289		0.056		94.287
	0.183	0.59			0.773	4.196	90.898	0.019	0.603	0.176	0.043		0.02		97.501
	2.664	12.277			0.145	15.858	54.843	0.004	0.033			0.002	16.589		102.417
	0.617	2.93			1.276	22.101	40.965		2.351	1.065	0.002	0.04	0.071		71.418
	0.62	2.154			0.688	30.692	47.034		1.688	0.778			0.349		84.003
	0.399	4.084			4.54	17.699	45.26	0.038	3.631	0.933	0.086	0.002	1.296		77.966
	0.219	2.683			2.739	19.798	34.055	0.048	3.494	1.034	0.012		1.769		65.849
	0.207	3.59			2.177	25.645	45.509	0.08	5.321	1.135	0.103		0.215		83.981
	0.45	0.796			2.296	4.272	72.922	0.006	1.467	0.653	0.018	0.008	7.393		90.281
	0.026	0.097				0.344	95.531	0.002		0.024	0.046		0.068		96.137
	0.266	0.154			1.518	0.401	75.266		0.013	0.364					77.982
	0.278	0.576			0.206	27.126	33.461		0.235	0.126			0.16		62.167
	0.472	3.202			1.611	12.963	24.543		1.176	0.25	0.77	0.005	0.496		45.487
	0.203	0.797			0.783	3.647	63.795	0.018	0.546	6.047			0.137		75.971
	0.924	1.692			1.15	9.054	21.78	0.139	0.694	17.09	0.07	0.008	7.544		60.144
	0.183	0.121			0.205	0.549	31.377	0.014	0.061	0.07	0.047	0.009	0.64		33.276
	0.278	0.412			1.243	1.405	51.108	0.028	0.195	0.065	0.065	0.033	0.035		54.865
	0.637	2.361			1.925	9.021	19.465	0.022	1.486	0.332	0.075	0.029	9.202		44.554
	0.622	2.05			1.857	7.578	37.559		1.111	0.34	0.07	0.016	13.27		64.474
	1.488	2.283			8.2	7.192	17.278	0.045	1.026	0.702	0.28	0.061	5.65		44.205
	1.051	0.321			0.787	0.825	48.441	0.066	0.133	0.461		0.04	9.804		61.928
	0.201	0.024			0.001	0.027	89.145	0.008	0.024	0.163		0.013	0.321		89.926
	0.095	3.671			15.164	20.335	40.053	0.059	4.872	0.586	0.225	0.025	0.443		85.527
	0.591	3.943			2.442	23.466	30.952	0.03	1.78	0.689	0.157	0.024	5.097		69.172
	0.31	3.81			2.612	23.923	32.62	0.016	1.911	0.738	0.156		5.392		71.489
4	1.46	1.91			5.95	10.31	45.17		2.22	16.59					83.61		Haoyuan Jiang, Yanqing Xia, Jiyong Li, Shanpin Liu, Mingzhen Zhang, Yongchao Wang. Controlling the iron migration mechanism for the cretaceous sediment color variations in Sichuan Basin, China. Acs Omega, 2022, 7(1): 480-95.
	2.36	3.85			6.64	17.61	56.59		4.55	0.61					92.21
	1.26	2.63			4.58	12.86	50.92		2.79	11.35					86.39
	1.43	2.55			4.97	12.59	50.89		2.74	11.48					86.65
	0.62	2.84			4.72	12.81	41.32		4.11	15.83					82.25
	1.03	2.72			4.77	12.82	48.34		2.86	12.78					85.32
	1.18	2.19			4.36	10.81	45.7		2.45	15.97					82.66
	0.56	2.5			4.18	10.95	36.22		2.43	22.52					79.36
	0.71	3.11			5.14	13.69	42.62		2.79	15.56					83.62
	0.61	3.47			5.91	14.83	46.43		3.61	12.01					86.87
	0.88	2.78			5.65	13.57	55.55		3.28	7.9					89.61
	0.91	2.8			5.42	13.13	52.28		2.83	10.55					87.92
	1.05	2.71			5.18	13.24	55.03		2.72	8.83					88.76
	1.34	2.4			5.41	12.39	52.26		2.94	10.3					87.04
	0.83	3.05			6.1	14.23	54.65		3.28	7.58					89.72
	0.68	2.91			6.41	13.62	49.3		3.55	10.84					87.31
	0.9	2.79			5.57	13.06	52.18		3.02	10.33					87.85
	0.63	2.43			4.59	11.35	43.35		2.71	18.38					83.44
	0.87	2.78			5.26	13.12	53.03		2.9	9.67					87.63
	0.97	2.72			5.24	13.46	55.27		2.36	8.72					88.74
	0.98	2.38			4.42	11.44	46.3		2.03	15.66					83.21
	1.28	2.07			5.83	10.57	52.86		1.63	12.86					87.1
	0.97	2.8			4.68	12.39	56.69		2.23	8.54					88.3
	1.07	2.49			4.19	12.61	55.04		2.12	9.96					87.48
	1.78	2.01			5.37	12.99	63.81		0.86	6.4					93.22
	1.11	3.31			6.25	15.37	53.73		3.56	6.68					90.01
	0.9	2.84			5.88	13.25	50.66		0.77	4.01					78.31
5																	Shuobiao Li, Jian Chen, Guoding Yi. Experimental study on the relationship between micro-characteristics and compressive strength of the red bed rock. Geotechnical Investigation and Surveying, 2013, 41(03): 1-5. (in Chinese)
6																	Jian Wang, Yingchang Cao, Keyu Liu, Jie Liu, Xiujie Xue, Qisong Xu. Pore fluid evolution, distribution and water-rock interactions of carbonate cements in red-bed sandstone reservoirs in the Dongying Depression, China. Marine and Petroleum Geology, 2016, 72: 279-94.
7			6.5		6.5	21	56		2.2	6							Zhiqiang Wang. Study on the great and important geologicalproblems of Yintao project in Gansu province. Lanzhou University, 2006. (in Chinese)
			4.9	1.46	6.36	15.18	60.7		0	2.71
			2.71	1.24	3.95	10.9	52.39		0.07	12.18
			7		7	21	40		2.5	7
			4.9		4.9	22.7	55.8		1.6	5.7
			7		7	19	55.3		2.9	6.3
			7.2		7.2	19.1	55.5		2.1	8.6
			6.3		6.3	22.6	24.2		2.9	5.7
			6.97		6.97	19.01	55.27		2.88	6.28
			6.26		6.26	22.64	24.17		2.88	5.71
			4.9	1.46	6.36	15.81	60.07			2.71
			2.71	1.24	3.95	10.9	52.39	0.07		12.18
8	0.86	2.83	4.96		4.96	16.44	65.5		1.1	0.21							Minghua Zhao, Xiaoming Liu, Yonghua Su. Experimental studies on engineering properties of red bed material containing slaking rock. Chinese Journal of Geotechnical Engineering, 2005, (06): 667-671. (in Chinese)
	0.63	1.83	3.73		3.73	12.65	58.59		2.69	14.88
	0.46	4.05	7.41		7.41	20.78	61.52		1.38	0.37
	0.03	3.9	10.65		10.65	17.69	61.27		1.03	0.09
	0.56	3.28	5.82		5.82	15.92	52.04		3.92	8.82
	1.8	2.06	2.93		2.93	11.43	75.12		0.65	0.57
9																	Fangfang Gao, Xiyong Wu, Rui Deng. The Distribution of Red Beds and Analysis on Engineering Characteristics of Mudstone in Guangxi. Journal of Geological Hazards and Environment Preservation, 2017, 28(02): 48-52. (in Chinese)
			2.69	1.54	4.23	10.74	52.28		0.12	12.2
			8		8	25	39		2.6	9
10																	Jiang Li, Qiang Xu, Zeming Hu, Hanxiang Liu, Qun Zhang, Yuanhang Lu, Sen Wang. Experimental research on softening of undisturbed saturated slip soil in eastern of Sichuan Province red bed. Chinese Journal of Rock Mechanics and Engineering, 2015, 34(S2): 4333-4342. (in Chinese)
11			2		2												Zhicheng Li. Discuss the engineering properties of red rocks in Changsha region. Central South University, 2011. (in Chinese)
			2		2
			1		1
			4		4
			8.17		8.17	16.14	64.28			0.21
			7.41		7.41	20.78	61.52			0.37
			5.77		5.77	15.9	51.7			9.99
			3.72		3.72	12.6	46.88			15.62
			4.93		4.93	15.1	49.63			12.66
			4.93		4.93	10.4	70.13			8.46
			3.97		3.97	13.4	65			15.78
12																	Mohamed Najib Zaghloul, Salvatore Critelli, Francesco Perri, Giovanni Mongelli, Vincenzo Perrone, Maurizio Sonnino, Maurice Tucker, Mariangela Aiello, Caterina Ventimiglia. Depositional systems, composition and geochemistry of Triassic rifted-continental margin redbeds of the Internal Rif Chain, Morocco. Sedimentology, 2010, 57(2): 312-50.
	0.21	6.01	4.45		4.45	20.97	59.15	0.02	2.38	0.15	1.08	0.27		5.29	99.98
	0.23	5.84	7.87		7.87	20.18	56.65	0.02	2.26	0.11	0.97	0.19		5.66	99.98
	0.18	5.52	7.04		7.04	17.15	62.38	0.02	2.11	0.13	0.86	0.09		4.51	99.99
	0.22	5.79	7.78		7.78	20.13	56.87	0.02	2.34	0.08	0.88	0.11		5.75	99.97
	0.24	5.86	7.1		7.1	19.87	58.06	0.02	2.32	0.1	0.9	0.09		5.4	99.96
	0.36	4.43	5.77		5.77	17.5	64.27	0.08	2.33	0.17	0.79	0.08		4.21	99.99
	0.28	5.23	8.58		8.58	20.3	55.8	0.12	2.63	0.18	0.92	0.1		5.84	99.98
	0.24	4.95	8.07		8.07	19.78	57.33	0.02	2.58	0.09	0.92	0.07		5.94	99.99
	0.64	3.98	7.07		7.07	19.09	56.73	0.09	3.41	1.26	0.8	0.12		6.8	99.99
	0.38	4.62	8.64		8.64	20.38	51.26	0.04	4.11	1.33	0.76	0.2		8.27	99.99
	0.72	2.93	6.21		6.21	19.4	62.3	0.08	2.28	0.3	0.88	0.05		4.83	99.98
	0.69	3.33	6.68		6.68	19.78	59.34	0.06	2.4	0.9	0.9	0.06		5.85	99.99
	0.58	3.54	7.05		7.05	20.85	56.8	0.04	3.11	0.48	0.85	0.1		6.57	99.97
	0.3	2.98	7.19		7.19	21.77	58.11	0.02	1.56	0.31	0.87	0.03		6.85	99.99
	0.42	3.62	7.39		7.39	22.21	56.04	0.02	2.14	0.42	0.88	0.14		6.71	99.99
	0.42	3.56	7.26		7.26	22.06	57.05	0.02	2.14	0.21	0.92	0.02		6.33	99.99
	0.7	3.61	7.54		7.54	20.88	58.01	0.04	2.58	0.25	1.01	0.06		5.29	99.97
	0.84	2.68	5.73		5.73	18.81	64.06	0.04	2.2	0.41	0.84	0.05		4.32	99.98
	0.68	2.98	6.83		6.83	19.29	61.17	0.11	2.39	0.26	0.91	0.08		5.29	99.99
	0.86	2.94	6.6		6.6	18.22	63.05	0.04	2.32	0.25	0.92	0.06		4.73	99.99
	0.76	3.48	6.09		6.09	18.67	60.72	0.04	3.24	0.37	0.8	0.1		5.71	99.98
	0.62	3.05	6.53		6.53	19.43	60.4	0.04	2.71	0.4	0.87	0.06		5.88	99.99
	0.66	3.41	6.65		6.65	20.16	58.83	0.06	2.43	0.84	0.9	0.07		5.96	99.97
13																	Francesco Perri, Salvatore Critelli, Agustín Martín-Algarra, Manuel Martín-Martín, Vincenzo Perrone, Giovanni Mongelli, Massimiliano Zattin. Triassic redbeds in the Malaguide Complex (Betic Cordillera - Spain): Petrography, geochemistry and geodynamic implications. Earth-Science Reviews, 2013, 117: 1-28.
	0.25	4.51	8.35		8.35	20.86	55.55	0.07	2.42	0.92	0.98	0.07		5.75	99.73
	0.26	3.91	5.32		5.32	15.72	55.74	0.08	4.69	4.5	0.76	0.07		8.92	99.97
	0.23	6.49	9.68		9.68	21.95	51.11	0.03	2.73	0.32	0.96	0.13		6.34	99.97
	0.22	6.56	9.35		9.35	21.6	52.6	0.02	2.44	0.29	1.07	0.18		5.65	99.98
	0.22	6.29	8.55		8.55	21.09	53.96	0.03	2.69	0.33	0.96	0.16		5.43	99.71
	0.58	4.23	8.58		8.58	19.23	55.45	0.03	3.51	0.93	0.84	0.14		6.1	99.62
	0.48	3.88	8.12		8.12	19.55	54.06	0.03	4.41	0.71	0.76	0.14		7.45	99.59
	0.58	3.97	6.97		6.97	19.4	56.01	0.07	3.33	2.31	0.78	0.11		6.25	99.78
	0.57	3.53	6.13		6.13	17.67	56.59	0.1	3.72	3.05	0.76	0.11		6.85	99.08
	0.45	3.92	6.55		6.55	17.94	51.57	0.13	4.79	4	0.8	0.1		9.45	99.7
	0.41	4.38	7.97		7.97	19.09	51.64	0.1	3.93	2.84	0.82	0.09		8.43	99.7
	0.18	4.95	6.99		6.99	17.35	63.43	0.01	2.14	0.36	0.83	0.1		3.32	99.66
	0.66	3.89	6.64		6.64	18.31	56.22	0.1	3.28	2.91	0.79	0.11		6.58	99.49
	0.33	5.83	6.38		6.38	19.37	59.1	0.02	2.45	0.25	0.97	0.16		5.02	99.88
	0.28	5.41	7.37		7.37	17.7	61.13	0.02	2.25	0.24	0.93	0.16		3.65	99.14
	0.17	5.17	7.62		7.62	18.68	52.9	0.06	2.71	3.27	0.78	0.05		8.14	99.55
	0.19	6.26	7.07		7.07	20.84	51.68	0.02	3.06	2.14	0.8	0.12		7.26	99.44
	0.16	5.3	7.96		7.96	19.03	51.14	0.06	2.77	3.92	0.8	0.05		8.54	99.73
	0.15	4.06	5.57		5.57	13.49	35.92	0.06	4.22	16.19	0.57	0.06		19.24	99.53
	0.16	4.93	6.87		6.87	17.56	53.54	0.04	4.38	3.05	0.73	0.16		8.32	99.74
	0.16	5.28	6.63		6.63	16.38	44.89	0.07	5.01	8.62	0.71	0.06		12.01	99.82
	0.1	2.39	3.39		3.39	9.98	45.85	0.1	8.66	11.15	0.51	0.06		17.4	99.59
	0.16	4.53	6.9		6.9	17.16	51.47	0.05	4	4.63	0.75	0.1		10.02	99.77
14			4.24	1.21	5.59	18.18	47.69	0.16	2.39	7.58	0.69						Lianting Jiang, Jie Sun, Litian Hu, Wenhuan Zhan, Qinqin Tang, Jian Li. The Genesis and Geological Implications for Oceanic Redbeds of the SouthChina Sea in U1434 of IODP Expedition 349 - the Constraint fromDiffuse Reflectance and X-Ray Fluo rescence Spectroscopy. Spectroscopy and Spectral Analysis, 2019, 39(04): 1294-1300. (in Chinese)
			5.49	0.98	6.58	17.2	48.82	0.31	2.72	6.24	0.6
			5.73	0.9	6.73	16.82	49.49	0.33	2.88	5.87	0.65
			4.64	0.7	5.42	14.38	42.25	0.35	2.49	12.9	0.52
			6.46	0.86	7.42	18.5	52.77	0.31	3.06	1.83	0.68
			4.63	0.55	5.25	13.64	41.25	0.2	2.44	14.2	0.51
			6.83	0.11	6.96	12.78	40.91	0.65	5.34	11.1	0.49
15	0.2	7.1	0.77		0.77	10.9	31.4		1.2	0.2							Haiyang Wang, Chao Li, Meng Cheng, Zihu Zhang, Thomas J. Algeo. Redbed formation in the redox-stratified mid-Proterozoic ocean. Precambrian Research, 2022, 379.
	0.1	6.5	0.19		0.19	9.8	29.3		1	0.2
	0.1	6.5	1.24		1.24	10	28.5		1.1	0.2
	0.1	6.8	0.15		0.15	10.5	28.8		1	0.1
	0.1	6	2.85		2.85	9	29.9		0.9	0.2
	0.1	6.5	0.28		0.28	9.6	30.3		1	0.2
	0.1	6.6	0.22		0.22	10.1	28.6		1.1	0.2
	0.1	6.4	0.52		0.52	9.3	29.4		1	0.2
	0.1	6.6	0.27		0.27	10	29.6		1.1	0.2
	0.1	6.3	0.12		0.12	8.8	31.4		0.9	0.2
	0.1	6	3.32		3.32	8.8	29		1	0.2
	0.1	6.6	0.17		0.17	10.4	29		1.1	0.2
	0.1	6.6	1.73		1.73	9.6	27.8		1.5	0.2
	0.1	7.4	0.32		0.32	11.3	27		1.3	0.3
	0.1	6.6	1.61		1.61	9.8	28.5		1.1	0.2
	0.1	7	1.37		1.37	9.7	28.4		1.2	0.2
	0.2	7.7	0.13		0.13	10.9	30.8		1.3	0.2
	0.1	6.7	0.41		0.41	10.1	28.4		1.2	0.2
	0.1	6.5	1.04		1.04	9.5	29.5		1.1	0.2
	0.1	6.9	0.4		0.4	10.8	27.9		1.3	0.2
	0.2	6.7	0.28		0.28	10.1	29.2		1.2	0.2
	0.1	7	0.33		0.33	10.2	27.4		1.4	0.2
	0.1	6.8	2.77		2.77	10.1	27.3		1.4	0.2
	0.1	6.5	2.92		2.92	9.3	28.6		1.3	0.2
	0.1	6.6	2.35		2.35	9.7	27.5		1.4	0.2
	0.1	6.8	2.5		2.5	10	26.6		1.5	0.2
	0.1	6.7	2.65		2.65	10.3	26.6		1.6	0.2
	0.1	6.5	2.91		2.91	9.1	28.4		1.5	0.2
	0.1	6.5	3.09		3.09	9.5	28.4		1.5	0.2
	0.1	6.5	2.73		2.73	9.7	28.3		1.5	0.2
	0.1	6.7	2.77		2.77	10.3	27.1		1.5	0.2
	0.1	7.2	0.24		0.24	10.8	28		1.6	0.2
	0.1	6.3	2.21		2.21	9.6	28.7		1.5	0.2
	0.1	6.8	2.38		2.38	10.9	26.7		1.6	0.2
	0.1	6.7	1.96		1.96	9.9	27.9		1.4	0.2
	0.1	6.8	3.33		3.33	10.5	27.6		1.5	0.2
	0.1	6.7	2.06		2.06	10.6	27.4		1.4	0.2
	0.1	6	4.74		4.74	8.8	28.8		1.1	0.3
	0.1	6.3	0.32		0.32	9.5	25.2		1.4	0.2
	0.1	6.4	3.17		3.17	9.9	27		1.4	0.3
	0.1	6.5	2.22		2.22	10.2	28		1.5	0.4
	0.1	6.6	2.62		2.62	9.9	27.2		1.5	0.2
	0.1	6.5	0.3		0.3	9.6	29.4		1.2	0.2
	0.1	6.5	2.25		2.25	9.9	29.3		1.1	0.2
	0.1	6.6	0.62		0.62	9.8	29.3		1.1	0.3
	0.1	6.9	0.2		0.2	11	27.4		1.5	0.3
	0.1	6.7	0.15		0.15	10.1	29.5		1.2	0.2
	0.1	5.9	0.34		0.34	9.7	29.7		1.2	0.4
	0.1	6.2	0.27		0.27	9.9	29.8		1.2	0.4
	0.1	6.8	0.33		0.33	9.5	30.2		1	0.3
	0.1	6.8	0.36		0.36	10	29.2		1.1	0.3
	0.1	6.8	0.22		0.22	10.5	28.6		1.1	0.4
	0.1	6.7	0.31		0.31	10.7	28.8		1.2	0.3
	0.1	6.4	0.21		0.21	9.7	29.1		1.2	0.3
	0.1	6.2	0.09		0.09	8.5	32.3		1	0.3
	0.1	6.3	0.11		0.11	9.5	30.3		1.2	0.3
	0.1	6.5	0.14		0.14	9	30.7		1.1	0.2
	0.1	5.7	0.12		0.12	8.1	33.5		0.9	0.2
	0.1	6.3	0.25		0.25	9.5	31		1	0.2
	0.1	6.5	0.42		0.42	9.5	30.2		1.1	0.3
	0.1	3.2	0.98		0.98	8.5	30		1.6	0.3
	0.3	3.5	0.89		0.89	8.2	29.7		1.5	0.3
	0.1	3.8	0.9		0.9	7.9	29.8		1.5	0.3
	0.1	3.5	1.06		1.06	8.5	28.3		1.6	0.3
			1.33		1.33
	0.1	3.6	1.1		1.1	8.8	28.7		1.7	0.3
	0.1	4.2	2.6		2.6	8.3	28.6		1.3	0.3
	0.2	4.2	0.61		0.61	8.3	29.6		1.3	0.3
	0.1	4.2	2.47		2.47	7.5	29		1.1	0.2
	0.1	4.6	0.52		0.52	8.8	30		1.1	0.4
	0.1	4.4	0.39		0.39	8.4	30.1		1.2	0.3
	0.1	4.3	0.26		0.26	7	31.7		1.1	0.2
	0.1	4.1	1.69		1.69	7.8	30.3		1.1	0.2
	0.1	4.4	2.48		2.48	8	27.8		1.3	0.7
	0.1	4.6	0.64		0.64	8.4	30.6		1.1	0.3
	0.1	4.5	2.02		2.02	8	28.7		1.2	0.4
	0	4.4	1.77		1.77	6	29.1		1.1	0.2
	0.1	4.5	2.01		2.01	8.3	29.1		1.1	0.4
	0.2	4.9	0.48		0.48	9.1	30		1	0.3
	0.1	4.7	1.74		1.74	8.4	28.6		1	0.2
	0.3	4.5	0.55		0.55	8.3	31.2		0.9	0.2
	0.1	4.6	1.35		1.35	9	28.7		1	0.2
	0.1	3.9	0.21		0.21	7.9	33.5		0.7	0.2
	0.5	3.7	0.81		0.81	6.3	25.9		1	5.7
	0.6	3.6	1.13		1.13	6.2	25		0.8	6.8
	0.7	4.1	0.96		0.96	6.8	25		0.9	6.6
	0.7	3.8	0.72		0.72	6.3	23.4		0.9	8.4
	0.7	4.4	0.76		0.76	8	26.4		1.1	3.7
	0.8	4.5	0.13		0.13	7.7	28		1	4.3
	0.7	4.9	1.08		1.08	7.9	30.2		1.1	0.3
	0.6	5.1	1.06		1.06	8	29.9		1.2	0.2
	0.7	5.2	0.03		0.03	8.1	31.5		1.1	0.2
	0.7	5	0.81		0.81	7.9	29.9		1.2	0.6
	0.7	5.1	0.04		0.04	8.1	30.9		1.1	0.4
	0.6	5.1	0.18		0.18	8.1	30.7		1.2	0.2
	0.31	4.31	7.73		7.73	19	58.7		1.93	0.63
	0.31	4.31	7.72		7.72	19.64	58		1.93	0.63
	0.32	4.23	7.73		7.73	19.55	58.4		1.95	0.62
	0.32	4.23	7.72		7.72	19.55	58.4		1.95	0.62
	0.33	4.15	7.7		7.7	19.18	59.7		1.99	0.67
	0.3	4.21	7.68		7.68	18.8	59.7		2	0.68
	0.03	0.8	2.44		2.44	5.3	15.9		5.18	35.5
	0.03	0.78	2.4		2.4	5.4	15.6		5.16	36
	0.02	0.81	2.41		2.41	5.5	15.8		5.2	36
	0.06	0.81	2.43		2.43	4.9	15.5		5.26	35.5
	0.04	0.8	2.43		2.43	5	15.6		5.28	34.9
	0.03	0.8	2.42		2.42	5.3	15.9		5.14	36
16																	Kan Jin, Yuanping Cheng, Liang Wang, Jun Dong, Pinkun Guo, Fenghua An, Limin Jiang. The effect of sedimentary redbeds on coalbed methane occurrence in the Xutuan and Zhaoji Coal Mines, Huaibei Coalfield, China. International Journal of Coal Geology, 2015, 137: 111-123.
17	0.26	6.99	10.35		10.35	24.12	50.99	0.01	1.28	0.05	0.94	0.09		4.91	99.99		Francesco Perri, Salvatore Critelli, Giovanni Mongelli, Robert L. Cullers. Sedimentary evolution of the Mesozoic continental redbeds using geochemical and mineralogical tools: the case of Upper Triassic to Lowermost Jurassic Monte di Gioiosa mudrocks (Sicily, southern Italy). International Journal of Earth Sciences, 2011, 100(7): 1569-1587.
	0.17	4.56	3.74		3.74	16.16	70.74	0.01	0.92	0.04	0.49	0.05		3.11	99.99
	0.18	4.86	5.35		5.35	17.2	67.09	0	1.16	0.04	0.63	0.05		3.43	99.99
	0.2	5.27	5.99		5.99	18.04	64.71	0.01	1.13	0.04	0.78	0.05		3.76	99.98
	0.26	5.9	6.91		6.91	19.17	61.1	0.01	1.83	0.1	0.77	0.08		3.86	99.99
	0.14	5.62	6.57		6.57	17.81	62.85	0.01	1.77	0.04	0.8	0.04		4.34	99.99
	0.23	5.88	6.88		6.88	19.74	60.51	0.01	1.63	0.2	0.77	0.07		4.07	99.99
	0.21	4.48	4.51		4.51	15.98	68.22	0.08	1.35	0.18	0.83	0.06		4.07	99.97
	0.3	4.37	5.29		5.29	17.4	66.29	0.01	1.29	0.04	0.74	0.06		4.2	99.99
	0.3	4.58	5.3		5.3	17.61	65.9	0.01	1.21	0.1	0.74	0.05		4.18	99.98
	0.23	5.08	6.21		6.21	18.18	63.68	0.04	1.75	0.05	0.81	0.05		3.9	99.98
	0.25	4.9	5.79		5.79	18.55	63.81	0	1.18	0.02	0.8	0.03		4.66	99.99
	0.27	6.04	8.17		8.17	21.78	56.85	0.01	1.25	0.02	0.74	0.06		4.8	99.99
	0.2	5	5.95		5.95	19.48	61.88	0.01	1.31	0.02	0.85	0.05		5.21	99.96
	0.26	5.32	5.51		5.51	19.46	62.97	0.01	1.29	0.15	0.79	0.06		4.15	99.97
	0.29	4.99	6.34		6.34	20.15	61.59	0.01	1.31	0.05	0.77	0.06		4.32	99.88
	0.42	5.09	6.41		6.41	20.29	60.96	0.03	1.46	0.13	0.82	0.06		4.32	99.99
	0.37	4.21	6.46		6.46	18.52	64.17	0.01	1.46	0.02	0.85	0.02		3.9	99.99
	0.4	4.87	7.04		7.04	20.92	60.45	0.01	1.46	0.02	0.98	0.02		3.81	99.98
	0.45	5.76	7.96		7.96	23.9	54.65	0.01	1.31	0.02	1.08	0.03		4.82	99.99
	0.14	4.76	4.5		4.5	16.46	69.15	0.01	1.3	0.02	0.63	0.02		3	99.99
	0.19	5.74	7.38		7.38	19.56	60.28	0.02	1.72	0.02	0.8	0.02		4.25	99.98
	0.18	5.32	6.22		6.22	18.07	63.83	0.01	1.5	0.01	0.75	0.02		4.07	99.98
	0.18	5.76	7.19		7.19	19.32	60.12	0.02	1.66	0.01	0.76	0.03		4.94	99.99
	0.14	3.98	4.37		4.37	14.09	72.34	0.01	1.16	0.02	0.78	0.02		3.08	99.99
	0.19	5.62	6.09		6.09	19.5	61.67	0.01	1.54	0.03	0.78	0.03		4.52	99.98
	0.21	6.39	8		8	21.52	57.35	0.01	1.35	0.04	0.87	0.06		4.19	99.99
	0.21	5.92	8.96		8.96	20.56	58.03	0.01	1.3	0.03	0.89	0.07		4.01	99.99
	0.58	4.53	7.09		7.09	21.99	58.43	0.01	1.79	0.03	1.03	0.02		4.48	99.98
	0.38	4.1	6.75		6.75	20.91	59.37	0.01	2.56	0.02	0.9	0.03		4.96	99.99
	0.37	4.03	6.42		6.42	18.77	64.39	0.01	1.62	0.02	0.81	0.02		3.53	99.99
	0.43	4.59	6.78		6.78	21.4	60.17	0.01	1.77	0.03	0.87	0.02		3.91	99.98
	0.38	2.74	5.88		5.88	17.99	67.9	0.01	0.87	0.03	0.87	0.04		3.26	99.97
	0.36	3.48	8.17		8.17	18.86	62.3	0.07	1.57	0.17	0.86	0.05		4	99.89
18	0.92	2.31	3.13		3.13	9.47	60.02	0.06	1.45	10.39	0.56	0.05					Liuqin Chen, Fusheng Guo, Ronald J. Steel, Yuliang Li. Late Cretaceous redbeds from the Gan-Hang Belt in Southeast China: petrography and geochemistry implications for provenance, source weathering, and tectonic setting. International Geology Review, 2016, 58(8): 983-1004.
	0.92	2.02	2.37		2.37	7.67	53.47	0.07	1.17	16.62	0.49	0.03
	1.13	3.16	1.91		1.91	9.06	62.87	0.04	0.91	10.06	0.35	0.04
	0.94	2.42	4.26		4.26	11.26	60.34	0.09	1.96	8.47	0.57	0.09
	0.92	2.37	4.15		4.15	11.39	61.22	0.08	1.92	7.76	0.62	0.09
	1.07	2.44	4.23		4.23	11.78	59.47	0.1	2.16	8.33	0.59	0.11
	0.25	2.81	1.37		1.37	7.33	68.72	0.03	0.29	10.16	0.18	0.03
	0.71	2.86	1.86		1.86	8.87	67.82	0.07	0.42	9.76	0.38	0.03
	0.67	2.34	4.32		4.32	11.75	59.4	0.09	2.11	7.64	0.68	0.09
	0.51	2.22	2.85		2.85	9	74.8	0.03	0.44	3.97	0.58	0.06
	0.05	3.04	4.49		4.49	12.89	59.79	0.07	0.83	8.36	0.67	0.12
	0.06	2.46	2.75		2.75	9.6	81.13	0.06	0.36	0.15	0.55	0.05
	0.06	2.52	3.05		3.05	9.93	80.58	0.02	0.38	0.17	0.55	0.06
	0.56	3.98	1.93		1.93	10.18	71.9	0.07	0.37	4.91	0.28	0.03
	0.69	4.81	2.05		2.05	11.52	74.04	0.01	0.39	2.13	0.34	0.03
	0.83	5.87	2.02		2.02	12.09	75.46	0.01	0.39	0.51	0.28	0.03
	0.77	5.43	2.19		2.19	12	70.93	0.01	0.46	3.31	0.33	0.03
	0.73	5.3	2.35		2.35	12.01	71.64	0.02	0.53	2.66	0.37	0.04
	0.04	2.11	3.05		3.05	8.96	62.33	0.11	0.47	11.3	0.52	0.06
	0.07	2.72	5.12		5.12	12.53	74.45	0.01	0.51	0.3	0.61	0.08
	0.11	3.38	1.35		1.35	7.62	85.44	0.03	0.19	0.07	0.21	0.03
19																	Congxin Chen, Haifeng Lu, Conghua Yuan, Zhiyi Tong, Qiang Shen, Zude Lu. Experimental Research on Deformation Propertities of Red-Bed Soft Rock. Chinese Journal of Rock Mechanics and Engineering, 2010, 29(02): 261-70. (in Chinese)
20			2.7	1.8	4.5	10.9	52.4	0.1		12.2							Junjie Zhu. Study on Water-rock Mechanism and Time-dependentDeformation Characteristics of Red Beds Soft Rock in Central. Chengdu University of Technology, 2019. (in Chinese)
			6	2	8	17.5	54.5	0.1		5.5
		3.5	4.9	1.4	6.3	13	47.2	0.1	2.5	9.6	0.85	0.1
21																	Cuiying Zhou, Linghua Kong, Guangjun Cui, Lei Yu, Zhen Liu. Molding simulation of soft rock based on natural red bed materials. Rock and Soil Mechanics, 2020, 41(2): 419-427. (in Chinese)
22																	Fengyun Liu, Fei Xie, Enxi Qiu, Huairui Luo, Zhishen, Xusheng Wan. Experimental Study on Disintegration Evolution Charact-Eristics and Microscopic Response Mechanism of Red-Bedsoft Rock in Western Sichuan. Journal of Engineering Geology, 2022, 30(5) : 1597-1608. (in Chinese)
23																	Xiaoming Liu, Hanfei Xu, Minghua Zhao. Research on Methods of Eliminating the Slacking Properties of Red Beds Soft Rock Based on Fractal Theory. Journal of Hunan University (Natural Sciences), 2013, 40(06): 27-32.
24																	Yongan Zhang, Feng Li, Jun Chen. Analysis of the Nteract Ion Betw Een Mudstone and Water. Jounal of Eng ineering Geology, 2008, (1): 22-26. (in Chinese)
	0.32	3.76	6.92	1.18	8.1	18.74	59.36	0.02	1.98	0.69	0.88	0.08
	0.32	3.37	5.82	2.38	8.2	17.3	49.38	0.15	3.17	6.46	0.77	0.15
25																	Bo Cai, Kunlong Yin, Wenxing Jian, Yunxia Dai. Analysis of water-rock interaction characteristics and bank slope failure process of red-bed. Journal of Central South University (Science and Technology), 2009, 40(04): 1092-1098. (in Chinese)
26			8.17		8.17	16.14	64.28			0.21							Xiaoming Liu, Minghua Zhao, Yonghua Su, Yong Long. Grey Correlation Analysis of Slake Durability of Red Bed Weak Rock. Journal of Hunan University (Natural Sciences), 2006, (4): 16-20. (in Chinese)
			5.82		5.82	15.92	52.04			8.82
			4.38		4.38	15.67	69.37			0.11
			31.39		31.39	0	23.24			8
			2.86		2.86	11.66	50.84			13.61
			3.54		3.54	12.94	49			14.51
27	0.68	2.47	6.52	5.04	11.56	18.15		0.06	1.01	0.37	0.78	0, 06					Chong Tan, Bing Song, Xuanjun Yuan, Ce Liu, Tongshan Wang, Xi Zhu. Color Origin of the Lower Triassic Liujiagou and Heshanggou Formations Ｒed Beds in the Ordos Basin. Geoscience, 2020, 34(04): 769-783. (in Chinese)
	0.39	2.82	4.31	3.35	7.66	20.28		0.04	1.08	0.43	0.89	0.1
	0.75	3.35	2.04	0.79	2.83	10.34		0.03	1.76	1.23	0.31	0.07
	3.16	2.76	3.37	1.29	4.66	13.21		0.04	1.57	1.46	0.41	0.08
	2.68	3.18	5.85	3.09	8.94	15.25		0.09	2.93	3.37	0.7	0.25
	2.23	3.41	6.08	4.63	10.71	16.36		0.07	2.59	2.01	0.73	0.23
	1.26	2.67	2.88	4.82	7.7	18.42		0.13	1.89	1.18	0.74	0.38
28			2				42										Xiaoshuai Xie, Huasong Chen, Xinhong Xiao, Jing Wang, Jiawen Zhou. Micro-Structural Characteristics and Softening Mechanism of Red-Bed Soft Rock under Water-Rock Interaction Condition. Journal of Engineering Geology, 2019, 27(05): 966-972. (in Chinese)
29																	Huayan Yao, Shanpo Jia, Wenning Gan, Zhenhua Zhang, Kunlin Lu. Properties of Crushed Red-Bed Soft Rock Mixtures Used in Subgrade. Advances in Materials Science and Engineering, 2016, 2016.
30																	Huafeng Deng, Jingcheng Fang, Jianlin Li, Yao Xiao, Meiling Zhou. Mechanical properties of red-bed soft rock on saturated state. Journal of China Coal Society, 2017, 42(08): 1994-2002. (in Chinese)
31	0.01	1.07	1.74		1.74	2.13	89.06	0.016	0.23	2.31	0.04						Zhixin Pan, Hua Peng, Fang Ren, Encarnacion J. A Study of the Development of Red Bed Landforms in Zion National Park, the United States. Acta Geoscientica Sinica, 2016, 37(01): 116-126. (in Chinese)
	0.03	1.33	2.05		2.05	1.88	93.66	0.017	0.1	0.45	0.06
	0.03	2.79	1.91		1.91	3.92	90.92	0.014	0.08	0.01	0.33
	0.01	1.52	0.67		0.67	1.98	91.21	0.031	0.67	1.04	0.09
	0.02	1.5	2.04		2.04	2.33	89.54	0.022	0.93	1.13	0.07
	0.01	0.69	0.77		0.77	1.44	60.94	0.044	6.28	13.41	0.04
	0.04	2.8	2.3		2.3	5.01	81.6	0.043	2.12	1.98	0.29
	0.31	1.52	0.67		0.67	3.41	84.62	0.032	1.94	2.57	0.08
	0.39	1.76	1.7		1.7	4.39	83.96	0.029	1.91	1.62	0.16
	0.71	1.74	1.95		1.95	6.53	75.83	0.047	3.09	2.54	0.35
	0.11	3.6	2.91		2.91	8.67	72.63	0.035	3.03	1.83	0.48
	0.47	2.24	2.9		2.9	7.04	66.91	0.078	4.64	4.84	0.41
32			3.15	4.26	7.41	17.37	40.8	0.12		6.01		0.16					Xiumian Hu, Chengshan Wang, Xianghui Li, Jansa L.Upper Cretaceous oceanic red beds in southern Tibet: rock types, sedimentary environments, and color genesis. Chinese Science Series D: Earth Science, 2006,(9): 811-821. (in Chinese)
			1.77	6.68	8.45	15.97	37.89	0.28		11.55		0.21
	0.88	4.04	8.39	1.77	10.16	15.82	50.27	0.22	2.14	5.9	1.2	0.3
	0.95	2.56	4.07	2.52	6.59	13.04	59.14	0.25	2.02	5.32	0.87	0.62
	1.08	3.27	8.12	0.59	8.71	15.34	56.88	0.34	3.12	2.97	1.08	0.16
	1.3	3.24	4.02	2.45	6.47	15.4	58.1		2.44	3.11	0.65	0.17
	1.3	2.7	7.7		7.7	16.6	54.9	0.56	3.4	0.7	0.78	0.25
			4.27	1.8	6.07	9.67	31.43	0.24		25.78		0.17
			0.57	0.85	1.42	3.85	21.73	0.97		38.65		0.1
			1.2	0.11	1.31	2.83	25.3	0.59		37.56		0.14
			2	0.4	2.4	2.8	17.7	0.2		41.9		0.2
33																	Zhi Chen, Hua Peng, Vladimir Greif, Luobin Yan, Scott Simonson, Ru Ma. Analysis of Mineralogical Composition and Texture to Quantify the Mechanical Properties of Red Bed Soft Rock—A Case Study of Leipi Rock at World Heritage Site, Mt. Langshan in Hunan Province. Acta Scientiarum Naturalium Universitatis Sunyatseni, 2015, 54(04): 139-49. (in Chinese)
34	1.05	1.38	7.68		7.68	18.22	58.99		2.03	0.68	1.4						Yuchuan Yang, Jiawen Zhou, Fugang Xu, Huige Xing. An Experimental Study on the Water-Induced Strength Reduction in Zigong Argillaceous Siltstone with Different Degree of Weathering. Advances in Materials Science and Engineering, 2016, 2016.
	1.18	1.32	5.38		5.38	8.57	58.24		1.63	9.75	1.03
35																	Zefu Dong, Duowen Liu. Study on Engineering Character of "Red Rock " for Embankment. Journal of Hunan University( Natural Sciences), 2003, (03): 90-93. (in Chinese)
36	0.53	4.76	7.79	0.17	7.96	21.75	56.77		2.68	0.1	0.79						Baolong Zhu, Houtian Hu, Qiang Chen. Preliminary Study on the Characteristics and Hazar Dsishaped Roadcut Slope in Red Beds. Journal of Engineering Geology, 2003, (04): 411-415. (in Chinese)
	0.11	2.35	9.18	0.12	9.3	16.55	63.13		0.93	0.02	1.1
37																	Kai Huang, Bo Kang, Fusheng Zha, Yunfeng Li, Qing Zhang, Chengfu Chu. Disintegration characteristics and mechanism of red-bed argillaceous siltstone under drying-wetting cycle. Environmental Earth Sciences, 2022, 81(12).
		4.5			5.42	16.95	55.43		3.8	10.59
		4.5			5.32	16.97	56.9		3.6	10.27
		4.5			5.21	16.98	57.82		3.7	9.26
38																	Zongtang Zhang, Wenhua Gao, Chaofeng Zeng, Xiaoyu Tang, Jun Wu. Evolution of the disintegration breakage of red-bed soft rock using a logistic regression model. Transportation Geotechnics, 2020, 24.
39																	Wei Yuan, Junfu Lu, Jinsong Liu, Junmeng Wu. Cause Analysis of Persistent Heaving of Tunnel Floors in Red-bed Mudstone with Complex Geo-stress. Modern Tunnelling Technology, 2022, 59(02): 242-51. (in Chinese)
40																	Zhenhua Zhang, Xiaochuan Chen, Huayan Yao, Xiang Huang, Luwang Chen. Experimental Investigation on Tensile Strength of Jurassic Red-Bed Sandstone under the Conditions of Water Pressures and Wet-Dry Cycles. Ksce Journal of Civil Engineering, 2021, 25(7): 2713-2724.
41																	Jian Wang, Yuhan Pang, Yingchang Cao, Jie Peng, Keyu Liu, Huimin Liu. Sedimentary environment constraints on the diagenetic evolution of clastic reservoirs: Examples from the Eocene "red-bed" and "gray-bed" in the Dongying Depression, China. Marine and Petroleum Geology, 2021, 131.
42																	Jin Lai, Dong Li, Guiwen Wang, Chengwen Xiao, Juntao Cao, Chun Wu, Chuang Han, Xinjian Zhao, Ziqiang Qin. Can carbonate cementation be inhibited in continental red bed sandstone?. Journal of Petroleum Science and Engineering, 2019, 179: 1123-1135.
43	0.6	4.16			0.75	8.9		0	0.78	0.27	0.09	0.09					Michaela Aehnelt, Ulrike Hilse, Dieter Pudlo, Klaus Heide, Reinhard Gaupp. On the origin of bleaching phenomena in red bed sediments of Triassic Buntsandstein deposits in Central Germany. Geochemistry, 2021, 81(2).
	0.48	4.25			0.55	9.08		0.01	0.86	0.48	0.08	0.08
	0.9	3.66			0.65	7.28		0.01	0.45	0.51	0.08	0.09
	0.39	3.5			0.46	7.17		0.01	0.67	1.1	0.07	0.08
	0.64	3.09			0.57	6.49		0	0.31	0.13	0.09	0.07
	0.77	3.54			0.39	7.19		0	0.34	0.15	0.09	0.07
	0.27	1.79			0.4	3.34		0.04	0.13	0.09	0.07	0.05
	0.51	4.53			0.85	9.13		0	0.7	0.18	0.16	0.11
	0.27	5.74			1.03	12.93		0.01	1.59	0.16	0.09	0.11
	0.27	5.72			0.81	12.87		0.01	1.58	0.17	0.09	0.11
44	0.2	6.6	1.2	0.5	1.7	8.2	82		0.4	0.1	0.1	0.1		0.15	99.65		Muhsin Eren, Selahattin Kadir. Colour origin of red sandstone beds within the Hudai Formation (Early Cambrian), Aydincik (Mersin), southern Turkey. Turkish Journal of Earth Sciences, 2013, 22(4): 563-73.
	0.2	8.7	2.3	0.7	3	11	74.5		0.6	0.3	0.7	0.2		0.65	99.95
	0.3	9.1	3.4	0.6	4	11.5	72.6		0.7	0.3	0.6	0.2		0.5	99.9
	0.2	4.1	2.85	0.65	3.5	5.5	85.5		0.2	0.1	0.2	0.1		0.1	99.6
	0.2	6.6	1.65	0.45	2.1	9	80		0.5	0.1	0.3	0.1		0.75	99.75
	0.2	8	3.85	0.65	4.5	11.5	74		0.5	0.1	0.3	0.1		0.85	100.15
	0.3	8.7	2.65	0.55	3.2	12.6	73.8		0.5	0.1	0.5	0.1		0.75	100.65
	0.3	9.4	4.1	0.9	5	13.5	68		1	0.3	0.6	0.2		1	99.4
45			4.85		4.85	13.5	57.5			7.55				＜5			Chengyu Liu, Chizhong He, Manchao He. Engineering geology study on failure of red beds slopes along railway in the west of Hunan Province. The Chinese Journal of Geoloqical Hazard and Control, 2007, (02): 58-62. (in Chinese)
			15		15	5	40			16.05				＜5
46					8			0.46									Christopher J. Card, Michael Montenari. Comparative geochemistry of Early Carboniferous marine red beds (MRBs) and their significance for deep time paleoceanographic reconstructions. Sedimentary Geology, 2023, 444.
					8.97
		0.39			3.17	3.36	32.34	7.58	9.67	21.32	0.09	0.03
		2.97			5.17	16.57	33.01	1.39	2.09	20.32	0.47	0.11
		2.35			4.71	13.09	26.96	1.74	2.19	27.81	0.36	0.11
		1.44			2.84	8.09	19.66	2.18	1.63	37.56	0.23	0.08
		2.22			6.95	13.29	39.27	6.44	6.29	12.32	0.38	0.06
		3.67			7.37	20.75	39.11	1.72	2.22	12.32	0.61	0.12
		4.87			9.17	27.15	48.39	0.41	2.28	1.05	0.78	0.15
		4.59			8.39	25.67	47.47	0.6	2.2	3.39	0.76	0.14
		4.13			7.85	23.48	44.65	0.85	2.46	6.75	0.65	0.14
		3.83			7.21	19.96	52.89	1.63	3.02	1.22	0.61	0.12
		3.84			5.22	20.11	57.57	0.64	2.41	0.47	0.6	0.15
		3.14			6.32	17.19	48.37	3.21	4.38	5.58	0.53	0.08
		3.78			9.77	18.94	42.11	3.49	2.85	1.32	0.68	0.14
		3.73			7.15	20.55	44.5	1.69	2.91	7.66	0.6	0.12
		1.46			2.38	6.15	18.86	0.05	1.44	36.67	0.32	0.05
		2.29			3.27	6.44	20.45	0.03	1.4	35.1	0.35	0.08
		2.28			3.55	6.47	22.27	0.02	1.48	33.7	0.36	0.1
						19.18	67.58			0.5
		3.71			5.12	10.41	26.7	0.09	4.68	26.99	0.3	0.07
		6.4			9.56	22.54	65.03	0.06	2.06	1.3	0.68	0.23
		4.51			6.72	17.16	65.31	0.04	1.63	0.74	0.53	0.09
		0.23			0.26	0.06	3.47	0.06	0.38	53.09	0.02	0.05
		1.31			2.79	8.73	28.64	0.04	1.28	31.52	0.33	0.11
					7.66	8.73	53.09	0.22		10.77	0.48
					0.53	0.91	73.52	0.08		12.49	0.23
		1.47			3.15	8.65	26.25	0.05	1.16	32.85	0.32	0.07
		0.58			2.5	3.54	20.86	0.05	2.5	36.01	0.25
		2.7			7.7	16.6	54.9	0.56	3.4	0.7	0.78	0.25
		58.9			6.9	16.7	58.9	0.11	2.6	58.9	0.78	0.78
		3.2			6.75	15.12	15.62	0.11	2.49	3.09	0.77	0.16
		0.33			0.54	0.79	5.13	0.14	7.79	42.3	0.07	0.09
		0.35			1.29	3.78	6.85	0.13	0.66	43.71	0.13	0.08
		3.01			9.29	15.87	53.48	0.87	3.48	4.06	0.77	0.34
		3.45			4.42	14.63	64.92	0.07	2.24	4.12	0.52	0.15
47	0.295924	4.296	8.88938	2.23	11.3669	20.4212	54.5399	0.0204086	1.05104	0.281026	1.18655	0.224494					Ren Wang, Wanzhong Shi, Xiangyang Xie, Liaoliang Wang, Arthur B. Busbey, Walter Manger, Zhimin Xia. Hydrothermal indications of Early Cretaceous red beds in lacustrine successions, North Yellow Sea Basin, eastern China. Marine and Petroleum Geology, 2017, 88: 739-55.
	0.394123	4.41384	5.46857	3.53	9.3904	20.6019	55.4257	0.021327	1.20284	0.310521	1.15166	0.106635
	0.317375	4.27944	5.95205	3.7	10.0627	20.8018	54.8553	0.0102379	1.21831	0.177525	1.11736	0.0921411
	0.101719	2.53279	0.980301	0.5	1.5358	22.9605	59.1081	0.0101719	0.427218	0.0103753	1.22429	0.071203
	0.290587	4.99187	5.74348	1.07	6.93225	19.3718	60.3171	0.0207562	1.54634	0.24347	0.825682	0.155672
	0.19	4.32	5.68	1.51	7.35761	15.74	51.5	0.1	2.74	5.64	0.7	0.2
	0.333895	4.91643	6.05892	1.48	7.7032	17.6524	55.3098	0.0532358	2.19757	2.8347	0.787889	0.170354
	0.160271	2.85483	10.9305	0.53	11.5193	8.69492	61.4672	0.0200339	0.340576	1.18521	0.173694	0.0500848
	0.132076	2.37737	5.90906	1	7.02006	9.14008	69.3486	0.0101597	0.375909	0.580323	0.259073	0.071118
	0.144711	1.63317	3.21484	0.53	3.80367	11.5132	73.2016	0.020673	0.547834	0.706396	1.04378	0.165384
	0.260666	2.71753	1.59549	2.38	4.23967	15.5067	63.6162	0.095211	1.43451	2.64052	1.07906	0.169264
	0.183665	2.70396	1.51887	3.27	5.15184	15.6115	63.3515	0.132647	1.49993	1.70686	1.03036	0.14285
	0.32281	3.17516	1.73632	0.93	2.76955	20.411	60.2503	0.0426998	1.2938	2.23149	1.04615	0.10675
	0.267082	2.40457	5.65296	14.8	22.0958	13.0638	36.1456	0.321411	3.58321	3.65537	0.65319	0.155521
	0.221438	2.85856	4.08055	8.8	13.8574	16.5499	46.1589	0.171111	2.69751	3.00813	0.800799	0.120784
	0.381817	3.89999	5.91092	1.43	7.49965	18.4682	61.256	0.0319601	1.15056	0.343465	0.969457	0.138494
	0.334129	3.73423	6.94379	1.5	8.61029	17.7879	57.8917	0.0532731	1.17627	1.88374	0.96957	0.13851
	0.308411	3.86542	6.20641	1.27	7.61738	18.8223	59.3612	0.0308411	1.18224	0.828393	0.996168	0.143925
	0.337851	3.38368	8.85103	0.97	9.9287	17.7258	59.5906	0.0323199	1.00838	0.862725	1.04501	0.0646398
	0.29698	3.61496	2.60114	2.7	5.60084	18.7392	57.3011	0.0409627	1.96621	2.40246	1.09678	0.481312
	0.35	3.74	8.22	0.74	9.04214	17.12	61.5	0.03	1	0.79	1	0.1
	0.494123	3.2118	2.67313	2.43	5.37286	17.0522	49.718	0.0617653	3.23239	7.49708	0.766508	0.0720596
	0.472151	2.55383	2.69278	5.4	8.69218	13.3346	42.7175	0.23186	5.3117	8.72468	0.685041	0.0948519
	0.17	2.78	2.3	3.64	6.34404	12.98	62.04	0.06	2.17	3.38	0.76	0.15
	0.123613	2.37955	0.559305	0.47	1.08147	27.0243	57.9258	0.0103011	0.412044	0.0103011	1.30288	0.0412044
	0.223195	3.04333	0.915157	0.3	1.24846	26.5851	58.4029	0.0104885	0.541205	0.10908	1.15373	0.0524423
	0.196574	3.72456	0.180433	0.75	1.01368	28.7884	56.0571	0.010346	0.527646	0	1.18193	0.062076
	0.667787	4.41144	2.84026	4.3	7.61756	17.9264	51.6224	0.141652	2.61044	2.21888	0.825628	0.20236
	0.658634	3.52986	3.57175	5	9.12675	19.01	56.3798	0.26757	2.2126	0.398885	0.703297	0.185241
	0.327681	3.21537	2.71538	1.27	4.12635	12.586	72.9572	0.0204801	1.13664	0.470018	1.07582	0.0614402
	0.771545	2.44661	5.19887	3.58	9.17625	15.0147	52.2925	0.26395	2.19281	2.45412	0.662716	0.416228
48			3.15	4.26	7.41	17.37	40.8	0.12		6.01		0.16					Xiumian Hu, Chengshan Wang, Xianghui Li, Jansa Luba. Upper Cretaceous oceanic red beds in southern Tibet: Lithofacies, environments and colour origin. Science in China Series D-Earth Sciences, 2006, 49(8): 785-795.
			1.77	6.68	8.45	15.97	37.89	0.28		11.55		0.21
	0.88	4.04	8.39	1.77	10.16	15.82	50.27	0.22	2.14	5.9	1.2	0.3
	0.95	2.56	4.07	2.52	6.59	13.04	59.14	0.25	2.02	5.32	0.87	0.62
	1.08	3.27	8.12	0.59	8.71	15.34	56.88	0.34	3.12	2.97	1.08	0.16
	1.3	3.24	4.02	2.45	6.47	15.4	58.1		2.44	3.11	0.65	0.17
	1.3	2.7	7.7		7.7	16.6	54.9	0.56	3.4	0.7	0.78	0.25
			4.27	1.8	6.07	9.67	31.43	0.24		25.78		0.17
			0.57	0.85	1.42	3.85	21.73	0.97		38.65		0.1
			1.2	0.11	1.31	2.83	25.3	0.59		37.56		0.14
			2	0.4	2.4	2.8	17.7	0.2		41.9		0.2
49																	Hongming Yu, Yong Liu Changhong Luo, Yanmin Liu. Petrophysical Characteristics of ResidualRed Clay in Badong Group Soft Rock. Geological Science and Technology Information, 2013, 32(01): 186-190. (in Chinese)
	0.42	3.13	5.48		5.48	13.9	55.21	0.085	3.3	6.36	0.7	0.14
50																	Xiaoqiang Wang, Huayan Yao, Ling Dai, Linlin Zhang, Jianguo Lu. Experimental Study on Slaking Characteristics of Red-bed Soft Rock in Southern Anhui Province. Chinese Journal of Underground Space and Engineering, 2021, 17(03) : 683-691. (in Chinese)
51	0.19	0.46			16.16	8.87	13.25		1.74	28.78	0.29	0.33			70.4		Ondřej Bábek, Tomáš Kumpan, Wenjie Li, Markéta Holá, Daniel Šimíček, Jaroslav Kapusta. Incipient reddening of Ordovician carbonates: The origin and geochemistry of yellow and pink colouration in limestones. Sedimentary Geology, 2022, 440: 106262.
	0.18	1.67			4.64	7.64	13.7		1.19	39.16	0.63	0.23			69.32
		1.92			4.94	8.05	14.42		1.31	38.19	0.49	0.32			69.9
		2.21			5.26	9.33	16.98		1.39	34.73	0.83				70.96
	0.15	1.9			6.88	9.05	17.39		1.39	34.54	0.53	0.33			72.48
		2.43			8.33	11.12	20.76		1.47	29.76	0.65	0.22			75.05
	0.17	2.12			7.79	10.57	18.7		1.53	31.58	0.63	0.25			73.71
		0.17			1.88	0.42	0.74	0.34	0.46	59.08	0.21	0.22			63.94
		0.21			1.7	1.39	2.65	0.26	0.4	56.19					62.96
					2	0.25	0.36	0.31	0.3	58.04					61.45
					0.73	0.25	0.66	0.33	0.39	59.62					62.26
		0.25			2.98	1.31	2.3	0.29	0.81	53.78		0.17			62.13
		0.33			2.72	2.89	5	0.26	0.66	53.24	0.17	0.19			65.79
	0.21				2.17	0.54	0.8	0.27	0.69	54.49	0.16	0.2			59.82
	0.16	0.21			6.59	2.86	4.3	0.29	1.1	47.14	0.16	0.25			63.42
	0.15				2.19	0.42	0.64	0.3	0.59	54.32					58.78
	0.25	0.18			2.36	0.81	1.41	0.34	0.7	53.83	0.2	0.19			60.58
	0.19	0.21			3.6	1.65	2.34	0.28	0.93	51.34	0.23	0.24			61.32
	0.25	0.2			2.97	1.23	1.8	0.31	0.91	52.79	0.32	0.26			61.37
	0.17				1.78	0.23	0.44	0.25	0.57	58.31		0.17			62.15
	0.17					0.16	0.23		0.67	60.28					61.75
	0.2				1.77	0.4	0.56	0.25	0.72	56.58	0.16	0.19			61.05
		0.51			33.82	21.47	27.15		6.53	0.99					90.68
					1.78		0.34	0.33	0.36	59.56					62.6
					1.11					62.06					63.17
					1.74			0.18		61.12					63.04
	0.22				1.61	0.39	0.62	0.3	0.75	57.14	0.16	0.26			61.81
					36.14	20.91	25.65		6.62	1.11		0.17			90.84
	0.19				1.37	0.32	0.36	0.29	0.72	57.9	0.16				61.57
	1.24	2.69			35.14	14.36	26.96		1.19	10.89	0.45				93.08
		0.71			4.38	3.08	5.59		0.91	48.22		0.18			63.32
		2.22			8.94	7.41	18.14		1.07	34.67	0.32	0.32			73.43
		0.5			0.77	1.44	2.91		0.65	56.21					62.69
		1.41			22.41	12.66	21.93		4.45	18.46	0.33				81.87
		0.38			1.86	2.71	5.08		0.67	55.27					66.13
							0.17		0.87	60.82					62.07
		0.2			1.37	0.66	1.36		0.44	58.01					62.04
		0.15			0.99	0.32	0.59		0.65	58.61					61.55
					0.37		0.42			61.6					62.39
	0.22				3.46	0.36	0.64		0.89	54.94	0.24	0.25			61.4
					0.44		0.2		0.88	60.83					62.57
52																	Long Zhang, Chiyang Liu, Shaohua Zhang, Mostafa Fayek, Kaiyu Lei, Xiaoyuan Quan. Unconformity-controlled bleaching of Jurassic-Triassic sandstones in the Ordos Basin, China. Journal of Petroleum Science and Engineering, 2022, 211.
	0.19	1.33			1.27	17.29	72.29	0.01	0.39	0.09	0.33	0.02			99.53
	0.06	0.92			1.39	18.14	72.25	0.01	0.13	0.1	0.57	0.02			99.83
	0.05	0.92			1.38	18.02	72.43	0.01	0.14	0.09	0.57	0.02			99.85
	0.02	0.92			1.35	18.2	72.1	0.01	0.11	0.08	0.58	0.02			99.99
	0.04	0.61			1.46	14.8	77.18	0.01	0.07	0.04	0.32	0.01			99.72
	0.09	1.1			1.68	10.84	81.05	0.01	0.05	0.04	0.71	0.02			99.82
53	0.18	2.83			2.02	16.39	76.22	0.01	0.19	0.09	0.57	0.01			99.55		Yanping Ma, Chiyang Liu, Fuxin Zhang, Junfeng Zhao, Lin Yu, Lei Huang. Genesis and Characteristics of the Dongsheng Kaolin Deposits in Ordos Basin. Journal of Jilin University (Earth Science Edition), 2007, (05) : 929-936. (in Chinese)
54																	Yao Bai, Renliang Shan, Yang Ju, Yongxin Wu, Xiao Tong, Tianyu Han, Haoyu Dou. Experimental study on the strength, deformation and crack evolution behaviour of red sandstone samples containing two ice-filled fissures under triaxial compression. Cold Regions Science and Technology, 2020, 174.
55																	Ana L. Rainoldi, Marta Franchini, Daniel Beaufort, Patricia Patrier, Adolfo Giusiano, Agnes Impiccini, Josefina Pons. Large-Scale Bleaching of Red Beds Related to Upward Migration of Hydrocarbons: Los Chihuidos High, Neuquen Basin, Argentina. Journal of Sedimentary Research, 2014, 84(5) : 373-93.
	4.5	0.93	3.36	0.22	3.58	11.83	66.96	0.12	0.3	5.68	0.49	0.11
	3.79	1.05	1.76	0.47	2.23	10.88	78.24	0.02	0.36	0.78	0.28	0.03
	4.73	1.19	1.19	0.89	2.08	12.09	74.64	0.04	0.46	1.77	0.39	0.07
	3.57	1.12	1.68	0.74	2.42	11.13	76.43	0.02	0.52	0.9	0.39l	0.06
	3.95	1.28	1.52	0.79	2.31	12.41	75.59	0.02	0.71	1.14	0.26	0.04
56	1.298	2.202	9.49		9.49	15.26	49.85		1.71	7.044							Wenbin Cheng. Element Geochemical Record of Cretaceous OceanicRed Beds: Implications for Paleoceanic environment. China University of Geosciences (Beijing), 2008. (in Chinese)
	0.287	0.274	1.06		1.06	1.69	5.53		0.46	51.65
	0.507	0.196	0.98		0.98	1.88	6.55		0.45	50.06
	0.479	0.455	2.14		2.14	3.23	9.14		0.61	45.541
	0.521	0.377	2.12		2.12	2.74	12.49		0.61	44.65
	0.297	0.282	1.21		1.21	2.16	6.34		0.45	50.23
	0.535	0.155	0.9		0.9	1.71	4.52		0.52	51.44
	1.254	0.685	3.3		3.3	5.85	27.67		0.81	33.53
	0.684	3.361	9.56		9.56	18.36	56.25		1.72	0.887
	0.44	0.29			1.4	2.24	7.43		0.52	48.93
			4.2	1.66	5.05	9.53	30.95			26.18
			0.54	0.69	1.31	3.78	21.47			38.97
			4.04	3.46	7.08	20.27	58.87			0.76
	0.55	4.34	9.64	2.24	10.89	18.27	53.79		2.08	0.69
	0.95	3.9	7.49	1.29	8.01	13.86	49.68		1.63	8.65
			4.16	2.23	5.96	13.02	58.19			5.35
	0.03	0.15	0.22	0.13	0.36	0.59	3.29		0.38	53.34
	0.03	0.12	0.12	0.12	0.25	0.42	3.59		0.37	53.48
	0.09	1.2			2.3	4.2	72		0.71	1.9
57	0.53	4.47			5.21	16.98	57.82		3.65	9.26				2.38			Fusheng Zha, Kai Huang, Bo Kang, Xianguo Sun, Jingwen Su, Yunfeng Li, Zhitang Lu. Deterioration Characteristic and Constitutive Model of Red-Bed Argillaceous Siltstone Subjected to Drying-Wetting Cycles. Lithosphere, 2022, 2022(1).
58	0.7	2.5			6.7	14.3	52.7		2.5	6.8		0.1					Jianxin Zeng. Researches on Railway Engineering Geological Problems of Red Layers in the Eastern Area of Sichuan. Southwest Jiaotong University, 2012. (in Chinese)
	0.8	2.6			6.6	14.6	55.6		2.4	5.1		0.1
			3.86		3.86	13.06	62.21			6.9
59																	Wengui Zuo. Study on Engineering Property of Cretaceous System and Tertiary Red Beds in Hunan Province. Central South University, 2006. (in Chinese)
			4.96		4.96	16.44	65.5			0.21
			4.22		4.22	11.9	46.53			16.68
			3.79		3.79	12.65	48.59			14.88
			8.17		8.17	16.14	64.28			0.21
			6.88		6.88	13.01	67.75			0.15
			7.41		7.41	20.78	81.52			0.37
			10.65		10.65	17.69	61.27			0.09
			4.38		4.38	15.67	69.37			0.11
			2.2		2.2	8	23.24			31.39
			5.82		5.82	15.92	52.04			8.82
			6.56		6.56	15.99	51.71			8.44
			3.72		3.72	12.6	46.88			15.62
			5.77		5.77	15.9	51.7			9.99
			2.93		2.93	11.43	75.12			0.57
			2.86		2.86	11.66	50.84			13.61
			4.93		4.93	15.1	49.36			12.66
			3.54		3.54	12.94	49			14.51
			4.36		4.36	14.01	47.87			14.1
			4.57		4.57	13.85	49.26			13.56
60	1.45	2.86	6.62		6.62	14.73	60.05	0.109	2.63	10.23	0.8	0.17					Yongchun Guo. Study and Practice of Water Rock Physycal and Chemical Interaction in Redbeds Region. Southwest Jiaotong University, 2007. (in Chinese)
	0.27	2.52	7.38		7.38	19.22	66.75	0.036	1.66	0.81	0.83	0.044
			6	0.22	6.22	15.13	63.53		2.7	2.98	0.87
			5.9	0.16	6.06	14.89	62.34		2.24	3.57	1.02
			3.2	0.13	3.33	8.13	34.37		1.2	27.69	0.61
			3.49	0.1	3.59	9.59	35.29		2.75	24.8	0.51
61			3.86		3.86	13.06	62.21			6.9							Junxin Liu. Study on Stability of Embankments of Red Layers Subjected to Unsaturated Seepage. Southwest Jiaotong University, 2007. (in Chinese)
			3.44		3.44	11.65	57.83			4.9
			2.71		2.71	8.23	68.87			10.36
			2.5		2.5	9.09	68.19			9.74
62	0.9	2.6	5.8		5.8	14.2	54		2.7	7.4		0.2					Sanhui Qin. Study on Settlement Control of Embankmet and Soft Foundation of High-Speed Railway in Red Rock Area, Chengdu University of Technology, 2007. (in Chinese)
	2.1	2.5	5.3		5.3	14.4	61.1		2.7	4		0.2
	0.7	2.5	6.7		6.7	14.3	52.7		2.5	6.8		0.1
	0.8	2.6	6.6		6.6	14.6	55.6		2.4	5.1		0.1
			3.55		3.55	14.6	62.9			7.38
			3.51		3.51	15.4	63.8			6.76
	1.8	2.7	5.7		5.7	15.3	60.5		2.5	2.5		0.2
			3.53		3.53	13.8	58.7			2.76
63			4.96		4.96	16.44	65.5			0.21							Xiaoming Liu. Research on slaking properties of red beds soft rock and dynamic deformation properties of embankment. Huan University, 2006. (in Chinese)
			4.22		4.22	11.9	46.53			16.68
			3.79		3.79	12.65	48.59			14.88
			8.17		8.17	16.14	64.28			0.21
			6.88		6.88	13.01	67.75			0.15
			7.41		7.41	20.78	61.52			0.37
			10.65		10.65	17.69	61.27			0.09
			4.38		4.38	15.67	69.37			0.11
			2.2		2.2	8	23.24			31.39
			5.82		5.82	15.92	52.04			8.82
			6.56		6.56	15.99	51.71			8.44
			3.72		3.72	12.6	46.88			15.62
			5.77		5.77	15.9	51.7			9.99
			2.93		2.93	11.43	75.12			0.57
			2.86		2.86	11.66	50.84			13.61
			4.93		4.93	15.1	49.63			12.66
			3.54		3.54	12.94	49			14.51
			4.36		4.36	14.01	47.87			14.1
			4.57		4.57	13.85	49.26			13.56
64																	Zhijian Wang. A Dissertation Submitted to China Universityof Geosciences for the Degree of Doctor of Philosophy. China University of Geosciences, 2008. (in Chinese)
65																	Qiang Cheng. Study on Hazard Mechanism and Prevention Technology of Cutting Slope in Red Beds Soft Rock. Southwest Jiaotong University, 2008. (in Chinese)
66			4.87		4.87	13.94	60.83			8.41							Boxing Peng. Research on the Characteristics of Engineering andProperties of Large-Diameter Piles Sockted in Red BedsSoft Rock. Central South University, 2009. (in Chinese)
			4.71		4.71	9.55	55.79			10.88
			6.43		6.43	14.39	43.76			15.74
67																	Zhimeng Wang. Study on Applicability and Technology Forfilling Subgrade Using Red-Mudstone and Improved Soil in High-Speed Railway. Southwest Jiaotong University, 2009. (in Chinese)
			3.18		3.18	11.79	63.35			6.56
68																	Jianglong Liu. Research on Formation Mechanism and Geo-scientific Effects of Danxia Landform in Southeast China. Central South University, 2009. (in Chinese)
	2.69	3.3	2.19		2.19	12.45	64.26	0.076	1.16	7.01	0.24
	0.11	0.099	0.16		0.16	0.39	3.12	0.011	2.04	51.19	0.029
	0.11	0.31	0.93		0.93	1.91	79.5	0.076	0.49	9.5	0.062
	1.15	3.99	4.92		4.92	20.16	60.95	0.049	1.29	1.45	0.39
	1.94	3.53	1.32		1.32	10.15	75.9	0.13	0.61	2.62	0.094
	0.1	0.33	1.74		1.74	4.69	14.65	0.075	2.01	41.09	0.19
	0.1	0.59	0.94		0.94	1.77	20.55	0.049	1.49	40.45	0.12
	1.69	2.99	1.9		1.9	11.29	64.55	0.09	1.23	9.16	0.21
	0.68	4.81	1.1		1.1	10.56			0.9	7.56
	1.52	5.28	1.94		1.94	12.44			0.88	7.28
	1.1	5.05	1.52		1.52	11.5			0.89	7.42
	0.45	1.31	1.07		1.07	4.77			1.16	5.5
	2.44	3.24	4.02		4.02	15.4			2.44	3.11
69			6.92	1.18	8.1	18.74	59.36	0.02	1.98	0.7							Yongan Zhang. Study on Road Cutting Slope and Embankment Stability of Red-beds in Mid-Yunnan Province. Kunming University of Science and Technology, 2010. (in Chinese)
			5.82	2.38	8.2	17.3	49.38	0.15	3.17	6.5
			2.71	1.24	3.95	10.9	52.39	0.07		12
			6.26		6.26	22.64	24.17		2.88	5.7
			6.97		6.97	19.01	55.27		2.88	6.3
70																	Jun Li. Stability Study and Processsing Technical of The High Steep Rock Bedded Slope In Red Beds Area of Hunan Province. Central South University, 2010. (in Chinese)
			4.96		4.96	16.44	65.5			0.21
			8.17		8.17	16.14	64.28			0.21
			10.65		10.65	17.69	61.27			0.09
			4.38		4.38	15.67	69.37			0.11
			2.2		2.2	8	23.24			31.39
			5.82		5.82	15.92	52.04			8.82
			6.56		6.56	15.99	51.71			8.44
			5.77		5.77	15.9	51.7			9.99
			2.93		2.93	11.43	75.12			0.57
			4.36		4.36	14.01	47.87			14.1
71																	Haifeng Lu. Research on Engineering Characteristics and FailureMechanism of Badong Formation Soft Rock Slope. Institute of Rock and Soil Mechanics, Chinese Academy of Sciences, 2010. (in Chinese)
72			4.88		4.88	12.2	46.85		2.52	15.58							Bin Zhou. Reliability Analysis and Risk Assessment on Bedding Slope of Red Sandstone in Western Hunan. Central South University, 2010. (in Chinese)
			3.71		3.71	12.9	52.11		0.12	14.18
			8.2	1.12	9.32	16.12	64.5		1.28	0.6
			4.55		4.55	14.21	46.54		2.35	12.66
73																	Dan Zhao. The Research of Dynamics Property and Longtime Subsidence about Corrosion Weathered Red Layer under Base of Subway Tunnel. Central South University, 2013. (in Chinese)
74																	Yuhuan Song. Failure Models and Instability of Slopes with Soft and Hard Rock Interbedded Laminated Structure in Southwest China. Chengdu University of Technology, 2011. (in Chinese)
75		5.33	10.67		10.67	23.29	53.65		4.92	2.14							Yanbo Zhu. Research on the Unsaturated Characteristics of Weak Interealation in Soft Rock of Badong Formation in Yichang-Badong Highway. China University of Geosciences, 2014. (in Chinese)
76			4.3		4.3	10.6	63.2		2.7	7.1							Zizhong Wang. Systematic Researches on Red Bed Rock Mass Engineering Geological Problems of Water Resourcesand Hydropower Projects in Sichuan Basin, China. Chengdu University of Technology, 2011. (in Chinese)
			5.978		5.978	10.525	52.114		4.068	13.004
			4.32		4.32	10.6	56.25		2.74	7.09
			5.98		5.98	10.53	52.11		4.07	10
77		4.31	13.09		13.09	10.64	58		5.1								Yanchao Wang. Study on the creep mechanical properties of Badong formation mudstone and itsapplication on the time-dependent deformation analysis of the slope. China University of Geosciences, 2018. (in Chinese)
		1.66	1.9		1.9	4.82	63.51		1.32	3.34
		10.21	16.38		16.38	9.51	45.49		1.52
		7.4	20.1		20.1	8.87	47.37		2.24	4.51
		3.93	7.4		7.4	6.22	53.3		1.42	3.65
		4.89	6.71		6.71	10.94	62.65		3.01	1.2
		3.48	3.46		3.46	9.18	68.88		2.24	1.51
78	3.79	0.9	1.96	1.73	3.89	9.92	78.41	0.16	0.63	0.59	0.61	0.15					Qizhong Wang. Study on Formation Mechanism and Vulnerability of Qiaoba-Zhongdu Danxia Landform in Southwest Sichuan. Chengdu University of Technology, 2020. (in Chinese)
	2.58	1.27	2.05	7.6	10.49	8.9	65.78	0.22	0.82	4.79	0.44	0.12
	2.03	1.11	1.19	2.86	4.37	6.79	73.63	0.064	0.83	5.26	0.35	0.071
	2.03	1.12	1.35	4	5.79	6.94	73.18	0.079	0.9	5.29	0.38	0.074
	1.87	1.41	1.22	2.37	3.85	7.55	67.5	0.091	1.13	8.35	0.29	0.084
	2.13	1.09	2.19	4.74	7.45	8.12	61.67	0.1	1.31	8.82	0.74	0.15
	2.22	1.57	1.57	2.06	3.86	7.59	82.01	0.066	0.63	0.57	0.41	0.089
	2.23	1.52	1.29	1.97	3.48	7.64	66	0.06	1.36	9.01	0.38	0.089
	2.01	1.45	1.12	1.05	2.29	6.67	65.7	0.055	0.92	10.98	0.3	0.077
	1.82	1.41	1.31	1.81	3.31	6.69	62.6	0.064	1.21	11.44	0.45	0.095
	0.63	2.52	3.29	1.13	4.54	9.99	37.73	0.11	2.01	21.14	0.49	0.097
	1.53	1.48	1.12	1.24	2.51	6.36	62.56	0.1	0.51	13.25	0.28	0.081
79		3.99	10.57		10.57	25.94	45.09		7.71	3.78							Qihu Wang. Study on Engineering Geological Characterstics and Slop Stability of Red Beds in Gansu Province. Beijing University of Technology, 2016. (in Chinese)
		3.9	9.91		9.91	26.97	44.8		7.35	11.1
80	0.13	2.68	6.59		6.59	20.39	60.79		2.22	5.94	0.83	0.15		0.28			Xinghua Ju. Sduty on the settlement characteristics of argillaceous soft rock embankment on Expressway. Chang’an University, 2019. (in Chinese)
	0.13	2.72	6.72		6.72	21.08	60.23		2.42	5.47	0.84	0.16		0.23
81	0.3	2.48			1.07	6.95	80.75	0.01	0.77	3.28	0.13	0.02					Fujun Liu. Sedimentary environment and geomorphologic evolution of Danxia Landscape layer from Danxiashan, Guangdong Province. Chengdu University of Technology, 2020. (in Chinese)
	0.29	2.39			0.78	6.54	75.28	0.03	0.58	6.86	0.13	0.02
	0.24	2.36			0.99	6.26	67.29	0.03	0.46	11.35	0.13	0.02
	0.26	2.57			1.26	6.59	73.07	0.03	0.58	7.92	0.15	0.02
	0.23	2.1			1.29	6.12	72.4	0.03	0.64	8.57	0.18	0.02
	0.32	2.95			0.77	7.97	84.79	0.01	0.63	0.19	0.13	0.02
	0.09	2.63			1.85	7.45	85.02	0.01	0.66	0.35	0.2	<0.01
	0.66	3.08			0.87	7.95	84.71	0.01	0.48	0.27	0.15	0.03
	0.09	4.3			5.41	15.6	63.2	0.04	2.19	2.54	0.62	0.14
	0.52	3.06			2.88	10.78	71.47	0.02	1.55	3.55	0.49	0.08
	0.71	2.52			1.47	6.72	72.82	0.04	0.66	7.38	0.18	0.02
	0.41	2.91			0.79	7.66	85.05	0.01	0.68	0.24	0.14	0.02
	0.32	2.36			1.8	7.06	76.95	0.02	0.83	4.79	0.23	0.04
	0.13	4.91			6.69	18.24	60	0.05	2.63	1.17	0.72	0.19
	0.14	4.63			6.57	17.86	61.05	0.05	2.69	0.61	0.76	0.15
	0.11	4.25			5.95	16.23	64.19	0.04	2.42	0.51	0.77	0.15
	0.15	4.5			6.2	17.33	59.8	0.04	2.54	2.45	0.7	0.16
	0.11	4.26			5.91	16.26	56.44	0.04	2.37	5.27	0.66	0.16
	0.13	3.97			5.4	15.09	58.96	0.04	2.19	5.33	0.63	0.16
	0.16	5.35			7.16	19.38	58.22	0.04	2.99	0.75	0.78	0.11
	0.25	4.59			5.74	16.2	62.28	0.04	2.35	1.78	0.65	0.09
82		8.9	11.03		11.03	19.79	52.18		5.11	2.99							Wanli Liu. Study on engineering geological characteristics and pregnant sliding mechanism of Badong Formation slope with mudstone interlayer. China University of Geosciences, 2022. (in Chinese)
		3.47	9.62		9.62	24.12	55.93		4.79	2.07
		4.91	9.17		9.17	23.23	56.08		4.38	2.23
83	0.89	3.35			6.99	16.28	52.93		3.2	4.47							Qiong Nie. The Development Regularities and Three-dimensional Visualization of the Weak Intercalations in the Foundation of the Xiaonanhai Reservoir. China University of Geosciences, 2014. (in Chinese)
	0.96	3.24			6.27	15.5	53.53		3.05	5.31
	1.51	1.7			2.56	9.28	59.76		1.48	11.39
	1.59	1.84			1.61	9.84	64.27		1.24	8.87
84	0.29	1.76	5.32		5.32	13.5	69.01	0.12	0.7	0.14	0.62						Lihui Yang. The Study of Sedimentary Characteristics and Genetic Mechanism of the Quaternary Red Clay in The Middle and Lower Reaches of Yangtze river. East China Normal University, 2017. (in Chinese)
	0.14	1.46	6.12		6.12	13.84	69.29	0.11	0.56	0.21	0.66
	0.58	2.15	6.1		6.1	14.63	63.28	0.1	1.11	0.34	0.56
	0.18	1.48	6.83		6.83	15.48	66.55	0.05	0.56	0.28	0.65
	0.06	1.09	7.06		7.06	23.7	59.55	0.08	0.53	0.34	0.88
	0.05	1.15	11.26		11.26	27.94	55.33	0.04	0.43	0.31	1.15
	0.05	0.9	5.48		5.48	19.83	65.24	0.04	0.57	0.35	0.78
	1.01	2.32	5.75		5.75	15.5	63.98	0.1	1.56	0.98	0.84
	0.88	2.32	6.19		6.19	16.01	62.48	0.15	1.53	2.33	0.82
	1.68	2.45	4.56		4.56	11.75	58.35	0.09	2.25	8.87	0.66
	1.53	2.93	5.81		5.81	13.6	65.23	0.11	2.02	2.79	0.75
	1.4	1.86	3.66		3.66	11.32	68.6	0.1	0.94	0.77	0.46
	0.32	2.56	5.05		5.05	18.97	51.88	0.09	0.77	0.27	0.7
	3.9	3.4	5		5	15.2	66	0.06	2.2	4.2	0.5
85																	Zhiqin Huang. Experimental study on physical and mechanical characteristics of fly ash modified red-layer mudstone subgrade filler. Lanzhou Jiaotong University, 2022. (in Chinese)
86			6.5	0	6.5	21	56		2.2	6							Yuewen Deng. Study on Research and Development of Anti-Scour Agent for The Red Beds Slope. Chongqing Jiaotong University, 2021. (in Chinese)
			7	0	7	21	40		2.5	7
			4.9	1.46	6.36	15.81	60.07		0	2.71
			2.71	1.24	3.95	10.9	52.39		0.07	12.18
			6.5	0	6.5	21	56		2.2	6
			7	0	7	21	40		2.5	7
			6.97	0	6.97	19.01	55.27		2.88	6.28
			6.26	0	6.26	22.64	24.17		2.88	6.71
			2.71	1.24	3.95	10.9	52.39		0	12.18
			4.9	1.46	6.36	15.81	60.07		0	2.71
			6.92	1.18	8.1	18.74	59.36		1.98	0.69
			4.9	0	4.9	22.7	55.8		1.6	5.7
			7	0	7	19	55.3		2.9	6.3
			7.2	0	7.2	19.1	55.5		2.1	8.6
			6.3	0	6.3	22.6	24.2		2.9	5.7
			4.96		4.96	16.44	65.5			0.21
			4.38		4.38	15.67	69.37			0.11
			5.82		5.82	15.92	52.04			8.82
			8.17		8.17	16.14	64.28			0.21
			10.65		10.65	17.69	61.27			0.09
			5.77		5.77	15.9	51.7			9.99
			4.36		4.36	14.01	47.87			14.1
			2.2		2.2	8	23.24			31.39
87																	Yu Jiang. Formation mechanism of red-strata landslide based on water-rock (soil) interaction. University of Chinese Academy of Sciences, 2020. (in Chinese)
	3.28	16.36			4.46	31.01	42.73			1.88
	3.53	13.26			3.49	30.81	43.76			2.15
88	1.44	4.63	2.884	0.086	2.97	14.09	73.24	0.095	0.683	0.155	0.49	0.028					Dongxing Liu. Sedimentary characteristics and paleoclimate of the Late Cretaceous Zhoutian Formation in the Huichang Basin of Jiangxi Province. East China University of Technology, 2022. (in Chinese)
	0.697	4.05	2.694	0.086	2.78	13.12	75.48	0.125	0.602	0.13	0.462	0.02
	1.06	4.11	2.223	0.057	2.28	11.31	78.3	0.166	0.498	0.162	0.373	0.019
	0.645	5.66	5.972	0.618	6.59	18.56	60.13	0.051	2.7	0.187	0.783	0.054
	1.41	4.7	2.071	0.259	2.33	13.25	75.29	0.12	0.575	0.2	0.355	0.018
	1.39	5.08	2.461	0.259	2.72	13.47	73.74	0.047	0.75	0.171	0.375	0.029
	0.72	4.31	3.278	0.402	3.68	15.49	70.76	0.071	1.04	0.132	0.616	0.017
	1.21	4.62	2.93	0.37	3.3	13.29	73.86	0.088	0.72	0.149	0.517	0.026
	1.18	4.26	3.492	0.208	3.7	14.31	71.48	0.089	0.968	0.168	0.633	0.023
	1.79	3.67	2.083	0.137	2.22	11.87	77.41	0.102	0.534	0.218	0.395	0.018
	1.56	5.35	2.422	0.108	2.53	13.45	73.09	0.07	1.09	0.255	0.382	0.019
	2.01	3.86	2.78	0.46	3.24	12.93	74.14	0.092	0.861	0.282	0.601	0.017
	1.81	4.6	3.134	0.496	3.63	14.14	57.94	0.087	1.66	7.3	0.498	0.13
	2.7	3.93	3.123	0.137	3.26	14.02	71.95	0.053	0.96	0.287	0.54	0.022
	2.44	4.36	3.59	0.28	3.87	14.43	70.04	0.068	1.2	0.374	0.583	0.102
	0.702	4.37	2.99	0.28	3.27	14.31	72	0.09	0.98	0.14	0.625	0.032
	1.42	4.25	3.29	0.28	3.57	14.35	71.36	0.048	1.07	0.15	0.601	0.032
	1.9	4.09	1.981	0.639	2.62	12.78	59.37	0.078	0.942	8.92	0.361	0.093
	0.728	5.14	4.951	0.639	5.59	16.19	64.82	0.117	2.05	0.304	0.742	0.073
	1.76	4.68	3.595	0.855	4.45	15.93	66.13	0.083	1.96	0.898	0.613	0.148
	0.669	5.02	5.062	0.368	5.43	15.87	65.74	0.04	1.99	0.23	0.754	0.041
	0.475	4.12	3.554	0.126	3.68	14.81	72.29	0.102	0.93	0.147	0.672	0.014
	1.75	3.61	2.792	0.678	3.47	13.77	59.51	0.085	1.52	7.51	0.516	0.131
	1.49	4.42	3.89	0.69	4.58	15.68	56.3	0.073	2.02	6.69	0.599	0.144
	1.77	3.35	2.684	0.506	3.19	12.75	58.02	0.085	1.47	9.35	0.501	0.127
	1.58	4.67	3.611	1.569	5.18	16.52	53.6	0.1	2.51	6.3	0.602	0.148
	0.818	2.65	5.787	0.333	6.12	13.9	70.91	0.112	1.11	0.099	0.776	0.103
	1.26	4.74	3.509	0.851	4.36	19.01	62.87	0.025	1.78	0.135	0.73	0.033
	1.06	4.05	5.869	0.391	6.26	16.05	65.91	0.018	1.1	0.083	0.688	0.055
	0.993	4.55	3.919	1.311	5.23	17.65	51.02	0.071	2.99	7.11	0.617	0.152
	0.756	4.75	3.959	1.701	5.66	16.69	51.96	0.072	3.22	6.75	0.612	0.157
	0.504	5.49	6.162	0.678	6.84	20.05	57.44	0.048	2.94	0.421	0.702	0.137
	0.355	4.86	6.961	0.609	7.57	20.8	56.71	0.047	2.44	0.109	0.779	0.089
	0.319	4.5	6.904	0.506	7.41	18.66	61.48	0.026	1.48	0.108	0.889	0.045
	0.284	3.61	5.913	0.287	6.2	16	67.86	0.107	1.01	0.072	0.826	0.041
	0.653	3.43	5.119	0.161	5.28	14.91	69.2	0.122	1.35	0.103	0.701	0.035
89																	Mingzhe Zhu. Research on laboratory test and creep model of steel slag improved red mudstone filling in Lanzhou area. Lanzhou Jiaotong University, 2022. (in Chinese)
90	1.99	2.99	3.02	0.6	3.62	11.15	74.24	0.082	1.22	3.04	0.4	0.13					Yulong Ma. Study on the characteristics and developmental mechanism of Danxia landform in Baishiling, Qionghai. Hainan Normal University, 2022. (in Chinese)
	2.06	3.42	2.63	0.62	3.25	11.88	72.94	0.063	0.72	3.53	0.35	0.12
	1.94	3.7	3.08	0.64	3.72	12.64	72.87	0.12	1.32	2.44	0.38	0.13
	1.93	3.18	3.07	0.71	3.78	11.49	74.83	0.063	0.95	2.44	0.38	0.12
	1.92	3.15	2.79	0.86	3.65	11.35	72.25	0.07	1.4	3.91	0.36	0.12
	2.04	3.56	2.85	0.55	3.4	12.12	73.19	0.084	1.26	2.7	0.36	0.12
	1.94	2.97	2.58	0.47	3.05	11	73.4	0.05	0.75	4.25	0.34	0.13
	2	3.36	2.94	0.46	3.4	12.08	72.91	0.065	0.78	3.5	0.39	0.14
	1.83	3.1	2.5	0.5	3	11.05	72.92	0.06	0.69	4.59	0.32	0.12
	2.03	2.98	4.57	1.74	6.31	13.49	68.3	0.11	1.69	3.57	0.73	0.27
	1.89	3.33	2.87	0.56	3.43	11.64	73.5	0.055	0.9	3.29	0.37	0.12
	1.88	2.95	2.69	0.69	3.38	11.26	72.6	0.058	1.27	4.16	0.34	0.12
	2.4	3.9	4.26	0.79	5.05	14.75	67.71	0.062	1.81	2.34	0.64	0.15
	2.41	3.98	4.19	1.17	5.36	14.74	68.27	0.057	1.59	2.11	0.61	0.15
	2.41	3.92	4.68	1.87	6.55	14.76	67.4	0.054	1.64	2.11	0.68	0.16
	2.16	4.23	3.98	0.54	4.52	15.03	68.34	0.052	1.38	1.85	0.56	0.14
	2.2	3.99	4.38	0.86	5.24	14.87	67.84	0.063	1.58	2.1	0.62	0.15
	2.4	3.86	4.99	1.11	6.1	14.69	66.83	0.067	1.74	2.25	0.76	0.17
91	0.5035	4.3302	4.679		4.679	22.1956	64.3195		1.3209	1.1693	0.7085			0.8794			Mengjie Ni. Study on engineering characteristics of cement titanium gypsum improving weathered residual soil in red bed. Hefei University of Technology, 2021. (in Chinese)
92																	Jun Zhang. Research on engineering geological characteristics and slope stability of Red Beds in southern Anhui Province. Hefei University of Technology, 2021. (in Chinese)
93																	Jiali Gu. Study on the influence test and evaluation method of SDBS solution on the properties of red bed soft rock. Hunan University, 2021. (in Chinese)
94																	Li Xiong. Study and application of slaking mechanism of red bed soft rock. Hunan University, 2011. (in Chinese)
95			1.87		1.87	10.06	67.32	0.033	0.95	3.54							Guoqiang Zhang. Research on Engineering characteristic of fully-heavily sandstone of Red-bed areafiller in Bazhong Airport. Chengdu University of Technology, 2015. (in Chinese)
			2.93		2.93	11.43	75.12	0.054	0.43	0.57
96																	Gang Sun. Research on Red Beds Soft Foundation Engineering Geological Properties and Engineering Effects in Luzhou Airport. Chengdu University of Technology, 2011. (in Chinese)
97	1.96	1.46			2.08	7.11	84.83	0.04	0.69	0.22	0.37	0.03	<0.01				Dajuan Wang. Study on characteristics of red layer weathering in Danxia landform area, Chishui city. Guizhou University, 2020. (in Chinese)
	0.7	3.9			7.07	16.62	55.29	0.05	3.28	4.69	0.74	0.15	0.01
	1.5	1.27			1.62	6.64	72.55	0.07	1.12	7.71	0.26	0.04	<0.01
	0.98	2.64			4.77	12.1	54.97	0.09	2.4	10.45	0.62	0.11	0.01
	1.72	1.37			1.3	6.01	77.28	0.06	0.37	6.35	0.15	0.02	<0.01
	1.22	2.03			3.99	10.32	57.36	0.08	5.8	6.88	0.58	0.11	0.01
	1.38	1.49			1.95	7.06	67.39	0.08	2.92	7.91	0.32	0.04	<0.01
	0.82	2.04			3.78	9.53	43.67	0.08	2.83	18.6	0.5	0.09	0.01
	1.42	1.2			1.74	6.37	69.03	0.11	2.7	7.75	0.3	0.04	<0.01
	2.23	1.37			1.32	7.51	85.29	0.03	0.63	0.2	0.42	0.02	<0.01
	2	1.41			2.08	7.13	71.43	0.08	0.88	7.66	0.38	0.05	<0.01
98	1.78	2.662	6.268		6.268	16.745	60.745	0.043	2.288	1.325	0.765	0.199	0.013				Study on Disintegration, Strength and Deformation Characteristics of Middle Weathered Mudstone in the Red Bed Area of Southern Sichuan. Xihua University, 2020. (in Chinese)
99																	Xuexue Cui. Analysis of disintegration characteristics and microscopic mechanism of red bed soft rock incentral Sichuan Province under dry-wet cycle. AnHui University of Science and Technology, 2019. (in Chinese)
100																	Xuetao Hu. Experimental and simulation study on the mechanical properties of red bed soft rock under the action of dry-wet cycle. Chongqing Jiaotong University, 2020. (in Chinese)
101	0.2	1.74	5.58		5.58	21.78	61.84		0.88	0.28	0.94			0.21			Yeqing Tao. Study of the Red beds water-rock(soil) chemical interaction in the slipping zone. Chengdu University of Technology, 2017. (in Chinese)
102																	Xiaowei Liu. Study on Physical and Mechanical Properties and Strength Parameters of Sliding Zone Soil of Gently Inclined Landslides in Southwest Red Bed Area. Chengdu University of Technology, 2020. (in Chinese)
	0.45	3.81	13.17		13.17	18.91	50.58	0.07	2.22	1.38	3.23	0.45
	0.33	3.29	12.99		12.99	21.55	45.58	0.09	2.24	1.22	5.44	0.38
	0.32	3.65	13.42		13.42	23.66	42.49	0.08	1.87	1.24	5.38	0.34
	0.31	3.06	14.38		14.38	23.05	43.08	0.08	1.76	1.11	4.63	0.32
	0.47	3.57	14.25		14.25	25.31	40.61	0.07	1.41	1.05	5.03	0.21
	0.29	3.77	11.09		11.09	15.66	53.42	0.11	5.58	2.07	2.36	0.48
103			5.945		5.945	21.15	49.915										Yizhang Yuan. Research on Engineering Characteristic of Red-bed Soft Rock and Evaluation on Applicability of Improved Soil in High Fill Slope-Taking Fuling Power Plant High Fill Slope as an Example. Chengdu University of Technology, 2013. (in Chinese)
			5.76		5.76	21.7	51.1
			3.38		3.38	6.76	17.07	0.01		36.26	0.5
			6.3		6.3	15.7	58.41	0.1		3.03	0.82
			3.84		3.84	8.47	49.2			16.25
			6		6	15	53			7
			6.135		6.135	11.225	54.275	0.3275		5.735	0.795
			2.93		2.93	11.43	75.12			0.57
			4.22		4.22	11.9	46.53			16.68
			5.82		5.82	15.92	52.04			8.82
			7.41		7.41	20.78	61.52			0.37
104			1.95		1.95	11.94	66.29	0.033	1.68	3.17	0.36						Lei Song. Research of Micro and meso-softening mechanism of red beds soft rock with water. Southwest Jiaotong University, 2014. (in Chinese)
	1.5	2.55	6.15	1.35	7.5	18.4	42.55	1.2825	3.185	6.81	0.94	0.2
			2.71	1.24	3.95	10.9	52.39	0.07	6.125	6.125
			4.01		4.01	15.845	63.625	1.1205	3.52	5.6	1.575
105	2.1	4.1	7.1		7.1	21.2	40.1		2.5	7.4							Bin Wang. The Study On Build-embankment Behaviors of Red-mudstone In Sichuan Region Based on GIS Technique. Southwest Jiaotong University, 2016. (in Chinese)
	1.4	2.9	6.2		6.2	17.1	52		3	2
	0.8	2.6	6.7		6.7	14.6	55.6		2.4	5.1
	2	3.2	7		7	16.7	43.2		2.8	3.7
	1.8	4.4	8.5		8.5	20.1	55		3.5	6.3
	1	3	9.6		9.6	11.2	53.6		3.2	8.1
	1.2	4.2	10.2		10.2	13.7	51.8		3.9	6.3
	2.6	5.2	8.12		8.12	17	45		3	2
	0.7	2.5	6.7		6.7	14.3	52.7		2.5	6.8
	0.9	3.6	9.1		9.1	18.9	48.2		2.6	8.3
	2.4	4.3	8.2		8.2	14.4	53.7		4.1	2.3
	1.4	3.1	6.4		6.4	11.3	57.1		2.9	3.6
106	0.09	4.5	4.12		4.12	13.95	63.68		0.97	5.54							Changhui Wen. The cretaceous stratum: pedogenesis recognition and paleoenvironmental analysis , in Shicheng basin, Jiangxi Province. Fujian Normal University, 2016. (in Chinese)
	2.68	2.8	4.98		4.98	14.21	57.91		2.05	7.27
	2.73	3.3	4.95		4.95	13.39	64.98		0.78	3.63
	3.89	3.39	4.49		4.49	15.17	65.89		2.2	4.19
	1.53	2.33	4.69		4.69	13.85	65.53		1.82	1.71
	2.66	2.98	5.42		5.42	14.38	61.88		3.34	8.9
	1.03	2.24	3.69		3.69	11.84	50.87		2.89	10.97
107																	Wenpeng Ma. Study on The Mechanism and Microscopic Characteristics of Red Layer Disintegration in Lanzhou. Lanzhou University, 2020. (in Chinese)
108																	Kai Lu. Study on Engineering Geological Properties of Red-bed Sandstone in Gaolan Mountain,Lanzhou. Lanzhou University, 2016. (in Chinese)
109	0.77	1.05	6.76		6.76	17.26	52.01		4.7	5.8							Guohai Ai. The Research on Deformation Characteristics of Red-Mudstone Packing of LeShan Airport. Chengdu University of Technology, 2016. (in Chinese)
110																	Xiongye Deng. Study on physical mechanicscharacter of Sichuan red strata soft foundation and its application in project. Southwest Jiaotong University, 2010. (in Chinese)
111	1.82	2.29	0.88		0.88	7.84	83.7		0.51	1.58							Aihua Ma. Study on Physical and Chemical Characteristics and Paleosedimentary Environment of Middle and Upper Cretaceous Sandstone in Longzhou, Jingbian, Shaanxi. Shanxi Normal University, 2020. (in Chinese)
	1.79	2.41	1.36		1.36	8.12	75.57		0.69	4.55
	1.24	2.33	0.92		0.92	6.24	87.46		0.35	1.65
	1.39	2.24	1.58		1.58	7.2	83.1		0.66	1.89
	0.85	1.79	0.87		0.87	4.65	90.93		0.18	1.9
	1.59	2.5	1.89		1.89	9.08	78.93		1.14	1.89
	0.97	2.19	0.9		0.9	5.48	89.46		0.29	1.42
112	4.1	5.07	14.451		14.451	15.27	23.24		8.45	11.198	18.221						Yiming Guo. Disintegration Characteristics of Red-bedded Mudstone under Hygrothermal Conditions. Changsha University of Science and Technology, 2019. (in Chinese)
113			2.71	1.24	3.95	10.9	52.39		0.07	12.18							Shumei Gao. Experimental Study on The Engineering Characteristics for Red Bed Weak Rock in The Acid Medium. Southwest Jiaotong University, 2014. (in Chinese)
			7		7	21	40		2.5	7
114	0.58	2.69	19.35		19.35	15.58	46.35		3.01	1.25	2.47	0.23					Hangsen Jin. Study on the correlation between physical and mechanical properties and microstructures of red-bed sliding zone soils in southwest China - Taking Camp Landslide of Meigu River Hydropower Station as an Example. Chengdu University of Technology, 2019. (in Chinese)
	0.47	2.41	18.34		18.34	19.57	40.17		1.78	2.54	3.24	0.18
	0.36	3.88	18.49		18.49	28.48	38.94		2.01	1.03	3.07	0.19
115	1.5	1.7	7.01		7.01	15.7	48.1		3.8	2.6							Yanjin Xue, Qicai Wang, Lina Ma, Yunyan Yu, Rongling Zhang. Mechanisms and controlling factors of heave in summer for high-speed railway cutting: A case study of Northwest China. Construction and Building Materials, 2023,365: 130061.
	1.7	2.3	7.8		7.8	15.1	53.5		5.3	2.9
	2.1	1.5	8.2		8.2	16.7	46.9		4.9	3.3
	1.8	2.4	7.4		7.4	13.8	55.3		3.9	4.6
	2.5	3	9.4		9.4	16.2	66.1		8	3.1
	1.9	3.3	8.7		8.7	17.1	48.7		5.5	4.8
	2.3	1.7	6.9		6.9	18.6	59		4	3.5
	2.2	1.8	10.7		10.7	15	47.3		4.4	5.3
	1.6	2.7	9.6		9.6	17.9	60		6	4.4
	1.1	3	7		7	16.1	61.8		6.6	2.4
	1.9	1.8	7.7		7.7	13.6	57.2		5.3	2
	0.8	3.2	8.3		8.3	20.9	50.3		4.7	3.8
	1.8	1.7	10.1		10.1	16.6	54.9		3.9	4.5
	1.2	2.8	11.3		11.3	19.5	59.6		5	5.7
	2.4	2.3	9.5		9.5	21.6	62.8		3.4	3.9
116	2.44	2.09			7.35	14.88	59.63	0.14	5.61	2.27	0.96	0.54			99.4		E. Uchida, Y. Ogawa, N. Maeda, T. Nakagawa. Deterioration of stone materials in the Angkor monuments, Cambodia. Engineering Geology, 1999, 55: 101-112.
	1.04	1.9			3.36	7.11	28.26	0.22	2.23	18.81	0.55	3.68			99.38
	2.56	2.74			7.03	13.48	59.02	0.13	3.77	2.36	0.94	2.84			99.48
	2.3	2.52			6.48	14.03	62.21	0.15	4.74	2.61	0.83	0.46			99.67
	2.05	2.6			5.23	9.81	41.66	0.09	3.48	10.84	0.61	0.42			99.82
	0.53	1.35			3.01	3.52	17.05	0.44	5.32	14.85	0.29	22.44			99.67
	0.76	1.07			2.44	3.78	20.2	0.25	3.21	19.3	0.25	15.6			99.78
	2.13	2.55			7.18	13.6	56.49	0.26	4.82	4	0.94	2.19			99.88
	3.11	2.49			3.41	12.49	69.21	0.04	1.93	2.03	0.29	1.58			99.65
	1.3	1.96			3.4	15.79	38.2	0.17	2.2	4.1	0.28	19.1			99.62
	2.16	2.55			6.96	13.74	54.88	0.12	3.92	2.42	0.79	4.74			99.77
	0.23	0.5			1.37	2.92	6.22	0.04	0.42	28.7	0.08	1.45			99.83
	2.02	2.71			5.13	11.2	49.28	0.16	1.9	6.44	0.66	11.85			99.69
117	0.12	1.61	5.01		5.01	12.48	72.43	0.01	0.69	0.16	0.53	0.11		6.74	99.91		Hanlie Hong, Zhaohui Li, Ping Xiao. Clay mineralogy along the laterite profile in Hubei, South China: mineral evolution and evidence for eolian origin. Clays and Clay Minerals, 2009, 57(5): 602-615.
	0.26	1.7	5.74		5.74	11.77	69.13	0.13	0.65	0.13	0.59	0.08		9.32	99.5
	0.11	1.52	6.25		6.25	13.26	71.27	0.05	0.56	0.51	0.61	0.06		5.37	99.43
	0.27	1.65	5.68		5.68	12.33	73.16	0.09	0.67	0.28	0.65	0.1		5.12	100
	25	1.68	5.84		5.84	11.85	73.73	0.07	0.63	0.43	0.58	0.16		4.58	99.8
	0.17	1.47	535		5.35	12.09	71.05	0.18	0.55	0.09	0.62	0.15		8.25	99.97
	0.14	1.63	7.25		7.25	16.41	65.28	0.03	0.47	0.3	0.54	0.12		7.52	99.71
	0.18	1.31	4.42		4.42	16.84	56.61	0.03	0.45	0.27	0.41	0.16		18.8	99.52
	0.09	1.38	2.76		2.76	17.93	58.47	0.01	0.48	0.21	0.39	0.07		17.84	99.63
	0.11	1.12	8.17		8.17	22.17	52.12	0.09	0.31	0.1	0.48	0.07		14.72	99.54
	0.13	1.42	7.37		7.37	20.28	53.2	0.02	0.52	0.23	0.52	0.07		16.02	99.82
	0.1	1.61	7.39		7.39	24.43	49.19	0.19	0.41	0.48	0.53	0.15		14.86	99.34
	12	1.53	7.98		7.98	20.99	48.23	0.17	0.4	0.32	0.44	0.86		18.55	99.57
	0.11	1.34	9.5		9.5	22.13	42.52	0.04	0.51	0.25	0.47	0.09		20.06	99.16
	0.21	1.54	4.76		4.76	15.71	51.82	0.05	0.49	0.5	38	1.47		22.98	99.89
	0.32	1.23	3.03		3.03	7.49	28.21	0.09	1.84	28.57	0.15	0.18		28.08	99.19
118	0.34	1.43	2.55		2.55	7.17	21.36	0.04	1	34.07	0.31	0.06					J. Bastida, R. Linares, A. M. L. Buendia, M. C. Osacar, J. Rosell, M. Zarroca. Weathering evolution in lutites of the K/Pg transition red beds of the Tremp Group (Tremp-Isona Basin, south Pyrenees). Clay Minerals, 2017, 52(1): 107-126.
	0.26	1.79	4.66		4.66	12.87	40.13	0.06	1.18	16.73	0.56	0.07
	0.39	1.8	4.39		4.39	12.52	43.32	0.06	1.32	15.48	0.59	0.05
	0.3	1.64	3.9		3.9	11.2	35.03	0.04	0.97	22.1	0.51	0.08
	0.43	1.2	3.92		3.92	10.43	44.88	0.06	1.03	18.88	0.56	0.06
	0.54	0.94	3.13		3.13	8.21	38.75	0.06	0.88	23.68	0.49	0.04
	0.53	1.47	4.03		4.03	11.34	42.78	0.07	0.93	19	0.58	0.08
	0.47	0.88	3.03		3.03	9.3	41.6	0.03	1.01	20.72	0.53	0.06
	0.48	1.17	4.1		4.1	11.43	40.3	0.04	1.64	18.89	0.54	0.03
	0.31	0.73	2.85		2.85	7.01	30.63	0.05	0.82	28.72	0.39	0.04
	0.39	0.93	3.14		3.14	8.22	33.64	0.07	1.23	25.68	0.42	0.04
	0.31	1.27	4.52		4.52	12.56	42.02	0.08	1.8	15.92	0.58	0.03
	0.33	0.67	4.49		4.49	12.54	42.28	0.05	2.48	15.36	0.56	0.01
	0.36	0.82	3.81		3.81	7.36	40.64	0.08	1.11	22.25	0.45	0.05
	0.53	1.73	4.53		4.53	12.28	41.65	0.08	1.8	15.86	0.57	0.05
	0.07	0.28	2.07		2.07	5.7	17.59	0.1	2.27	23.26	0.25	0.02
	0.06	0.33	2.25		2.25	5.66	28	0.06	2.12	25.73	0.33	0.01
	0.13	0.28	1.16		1.16	2.51	11.05	0.02	0.4	32.72	0.13	0.01
	0.05	0.39	1.6		1.6	4.52	16.5	0.04	5.19	24.25	0.22	0.01
	0.15	0.81	2.28		2.28	5.97	21.05	0.03	2.74	22.44	0.28	0.01
	0.07	0.33	0.84		0.84	2.7	9.48	0.02	0.32	30.06	0.19	0.04
	0.73	3.17	6.1		6.1	18.15	56.67	0.01	1.17	1.11	0.84	0.06
	0.18	1.62	3.83		3.83	10.44	36.86	0.05	1.58	21.91	0.52	0.09
	0.52	2.05	6.3		6.3	16.74	58.83	0.04	2.25	2.66	0.84	0.06
119	1.357	7.31	5.69	1.8	7.49	23.06	58.05	0.02	1.18	0.214	0.762	0.05					Olabode M. Bankole, Abderrazak El Albani, Alain Meunier, Olivier J. Rouxel, Franc Oisgauthier-Lafaye, Andrey Bekker. Origin of Red Beds in the Paleoproterozoic Franceville Basin, Gabon, and Implications for Sandstone-hosted Uranium Mineralization. American Journal of Science, 2016, 316: 839-872.
	1.561	5.944	6.45	0.93	7.38	18.38	64.46	0.03	1.1	0.354	0.338	0.11
	0.53	8.365	9.23	1.08	10.31	25.74	50.38	0.05	2.52	0.336	0.923	0.07
	2.064	6.69	3.97	0.75	4.72	21.66	61.2	0.01	2.27	0.48	0.486	0.09
	1.453	4.38	9.08	1.44	10.52	14.14	67.22	0.01	1.37	0.238	0.387	0.05
	0.116	8.628	6.64	0.27	6.91	24.64	57.32	0.03	1.38	0.183	0.874	0.11
	0.296	7.018	4.64	0.21	4.85	21.47	64.03	0.02	1.1	0.114	0.666	0.05
	0.114	9.006	14.03	0.05	14.08	29.5	44.72	0.03	0.7	0.072	0.703	0.05
	0.187	8.526	3.67	0.38	4.05	30.67	54.83	0.01	0.33	0.253	0.487	0.19
	0.193	8.393	2.57	0.56	3.13	30.75	56.02	0.01	0.34	0.121	0.385	0.08
	0.117	8.471	5.46	0.59	6.05	29.2	53.69	0.02	0.67	0.121	0.635	0.17
	0.119	8.269	4.74	0.53	5.27	28.21	55.83	0.01	0.57	0.252	0.699	0.21
	0.136	9.909	2.73	0.19	2.92	33.9	51.02	0.01	0.44	0.303	0.607	0.19
	0.148	9.323	4.53	0.36	4.89	31.33	52.07	0.01	0.71	0.289	0.615	0.1
	0.599	8.736	4.39	0.62	5.01	26.06	56.68	0.01	1.4	0.22	0.636	0.09
	0.302	9.045	4.26	0.52	4.78	28.09	55.27	0.02	0.14	0.148	0.562	0.11
	1.58	7.48	2.27	4.41	6.68	25.57	55.56	0.03	1.84	0.161	0.76	0.12
	0.12	9.09	3.27	0.46	3.73	26.28	58.03	0.01	1.51	0.4	0.92	0.12
	0.22	6.24	2.47	0.36	2.83	18	70.93	0.01	0.96	0.19	0.65	0.06
	0.16	6.66	2.62	3.27	5.89	24.76	61.08	0.02	0.74	0.11	0.48	0.08
	0.19	8.24	2.12	0.75	2.87	28.49	58.83	0.01	0.38	0.13	0.46	0.22
	0.19	8.31	2.18	0.89	3.07	28.83	58.41	0.01	0.39	0.3	0.49	0.13
	0.14	10.43	2.63	0.24	2.87	33.64	51.32	0.01	0.45	0.16	0.64	0.2
	0.16	10.07	2.89	0.42	3.31	32.28	52.32	0.01	0.71	0.3	0.64	0.19
	0.112	8.217			2.005	28.09	54.43	0.01	0.26	0.32	0.509	0.29
	0.122	8.689			1.733	29.77	52.21	0.01	0.237	0.366	0.515	0.27
	0.159	9.272			2.215	31.927	48.68	0.01	0.462	0.181	0.586	0.12
	0.12	8.578			3.594	29.423	51.57	0.01	0.357	0.211	0.622	0.16
	0.093	7.643			3.651	26.62	55.82	0.01	0.328	0.179	0.663	0.14
	0.105	8.129			1.62	28.11	56.15	0	0.183	0.461	0.5	0.36
	0.1	8.318			3.021	28.997	53.43	0.01	0.275	0.089	0.544	0.07
	0.143	7.846			4.002	28.023	53.36	0.01	0.471	0.221	.0.667	0.12
	0.58	6.83			5.168	25.96	53.05	0.02	1.177	0.223	0.655	0.1
	0.161	8.146			3.688	29.583	50.95	0.01	0.654	0.2	0.648	0.05
	0.141	8.396			2.579	29.16	52.21	0.01	0.64	0.252	0.506	0.11
	0.204	9.619			3.258	35.11	45.65	0.01	0.406	0.079	0.718	0
	0.149	7.632			1.97	27.57	57.08	0.01	0.315	0.381	0.524	0.26
	0.126	8.054			5.381	29.173	49.7	0.02	0.711	0.087	0.453	0
	2.559	1.493	1.709	0.33	2.039	8.092	81.33	0.02	0.747	0.94	0.175	<L.D
	0.924	0.272	0.022	0.2	0.222	2.443	82.36	0.02	0.241	6.366	0.036	<L.D
	1.776	0.496	0.303	0.39	0.693	4.899	82.91	0.01	0.773	3.285	0.033	<L.D
	2.817	0.346	0.606	0.11	0.716	5.832	68.75	0.01	0.25	8.219	0.028	<L.D
	0.273	0.94	0.18	0.2	0.38	2.777	69.99	0	0.088	10.25	0.089	0.08
	0.146	2.198	0.291	0.05	0.341	5.291	90.4	0	0.079	0.051	0.058	<L.D
	0.109	4.663	1.794	0.23	2.024	15.953	75.16	0.01	0.231	0.052	0.302	<L.D
	0.02	1.074	0.039	0.02	0.059	3.593	82.92	0	0.136	4.924	0.036	<L.D
	0.076	2.635			6.813	11.318	73.94	0.03	0.637	0.087	0.145	0
	0.028	0.951			2.246	4.189	76.7	0.01	0.201	0.061	0.034	0
	0.09	3.206			0.234	8.542	85.44	0	0.118	0.076	0.107	0
120																	Jie Liu, Qiang Xu, Sen Wang, Srikrishnan Siva Subramanian, Liang Wang, Xing Qi. Formation and chemo-mechanical characteristics of weak clay interlayers between alternative mudstone and sandstone sequence of gently inclined landslides in Nanjiang, SW China. Bulletin of Engineering Geology and the Environment, 2020, 79: 4701-4715.
	1.14	3.88	5.69		5.69	19.79	57.05	0.09	0.09	1.6	0.92	0.29
	0.86	3.84	6.16		6.16	20.7	56.05	0.11	3.18	1.52	0.9	0.29
	0.67	3.85	6.94		6.94	20.76	61.43	0.08	4.04	0.83	0.99	0.22
	0.55	3.32	5.32		5.32	18.67	60.55	0.17	2.59	0.9	0.84	0.2
121																	Anrun Li, Hui Deng, Tiegang Sun, Yi Wang, Xiaoyun Shu, Jing Wen. A time series comprehensive evaluation method of acoustic emission signal based on information entropy weighting and its application of red bed soft rock compression failure critical characteristics study. Journal of Building Engineering, 2023, 71: 106498.
122																	Jian Chen, Fuchu Dai, Ling Xu, Song Chen, Pengfei Wang, Wei Long, Naiqi Shen. Properties and microstructure of a natural slip zone in loose deposits of red beds, southwestern China. Engineering Geology, 2014, 183: 53-64.
123	2.83	2.51			3.1	15.35	60.97	0.08	1.94	1.94	0.46	0.16					Lingwei Kong, Zhixiong Zeng, Wei Bai, Min Wang. Engineering geological properties of weathered swelling mudstones and their effects on the landslides occurrence in the Yanji section of the Jilin-Hunchun high-speed railway. Bulletin of Engineering Geology and the Environment, 2018, 77: 1491-1503.
	0.87	2.86			7.43	15.9	49.39	0.38	3.25	2.11	0.74	0.47
124																	Dongyi Wang, Xibing Li, Kang Peng, Chunde Ma, Zhenyu Zhang, Xiaoqian Liu. Geotechnical characterization of red shale and its indication for ground control in deep underground mining. Journal of Central South University, 2018, 25: 2979-2991.
125		0.0108	0.23977		0.23977	0.07691	0.18754	0.00976	0.77366	44.8316	0.01347						Jonathan Knapp. Alluvial Fans, Loess Plains, Lakes, and Distributive Fluvial Systems: Depositional Systems of the Permian-Triassic Red Beds and Evaporites of Wyoming (USA). West Virginia University, 2020.
		0.0108	0.23977		0.23977	0.2347	1.11869	0.01093	1.06453	46.6642	0.04099
		0.2376	0.48094		0.48094	1.22936	7.69782	0.01235	0.84743	39.6767	0.07631
		1.35425	1.90425		1.90425	4.01609	29.0227	0.02754	1.23947	9.693	0.32656
		1.48046	1.94445		1.94445	4.14288	31.6483	0.02999	1.23947	12.6252	0.37132
		1.81427	2.87261		2.87261	5.18544	32.5642	0.02999	1.48818	15.179	0.44195
		2.395	3.70029		3.70029	6.9747	33.8312	0.03127	1.86477	11.6438	0.5034
		1.90481	4.30688		4.30688	5.30942	33.2511	0.04453	1.41793	7.08007	0.76728
		1.35425	1.74347		1.74347	3.83012	34.5944	0.0471	1.15446	12.0458	0.30987
		1.49601	2.45055		2.45055	4.53173	38.2122	0.04968	1.21207	11.2537	0.37883
		2.20752	5.0633		5.0633	6.81972	37.4642	0.05549	2.58702	2.9656	0.50646
		1.38992	2.64057		2.64057	4.26686	32.8237	0.03861	1.302	10.4024	0.39718
		2.18283	3.65096		3.65096	6.52386	35.9377	0.03785	1.53877	10.1423	0.48171
		2.95012	5.64797		5.64797	7.67631	32.2284	0.04311	2.6334	5.44847	0.58459
		2.3136	4.7801		4.7801	6.38298	34.167	0.07273	2.72333	6.2288	0.56013
		3.10194	5.92203		5.92203	8.37793	32.7321	0.07145	2.27648	5.24748	0.5832
		2.15265	3.83184		3.83184	6.47878	39.3112	0.06733	1.76781	3.54494	0.53871
		2.23861	4.47863		4.47863	6.75773	38.2122	0.05111	3.23972	4.91643	0.59071
		2.07125	4.13514		4.13514	6.46187	33.2511	0.05136	1.83385	8.77079	0.53566
		1.12196	1.56076		1.56076	3.73713	26.1682	0.06989	1.63151	19.0333	0.26844
		1.25823	1.7727		1.7727	4.21896	27.7558	0.0605	1.67437	14.7179	0.29124
		1.50058	2.06686		2.06686	4.67262	29.9539	0.05973	1.9266	19.5536	0.3374
		1.58655	4.23563		4.23563	4.98257	31.6483	0.07131	1.69755	7.52936	0.42944
		2.19746	2.32814		2.32814	6.69574	33.5869	0.07956	2.12472	14.9189	0.50479
		1.83896	3.11562		3.11562	5.80816	35.5256	0.06616	2.21395	5.83864	0.42638
		1.72281	3.37872		3.37872	5.26434	40.6698	0.0502	1.51137	9.10184	0.52481
		1.67709	2.83242		2.83242	5.4644	34.6707	0.05136	1.88795	7.52936	0.44195
		1.72281	2.71183		2.71183	5.60528	36.1056	0.043	1.77554	6.81996	0.40497
		1.65239	2.84338		2.84338	5.21644	34.8387	0.03719	1.89568	7.65941	0.37577
		1.50058	2.77212		2.77212	5.35732	35.5256	0.04223	1.91114	7.47024	0.39885
		1.23811	3.2362		3.2362	4.90367	35.1897	0.05174	1.49943	8.25057	0.48477
		1.37986	2.21669		2.21669	4.15697	33.8312	0.065	1.20856	11.5138	0.40358
		2.43524	2.92377		2.92377	4.51482	31.3888	0.05213	1.26687	9.88217	0.44946
		1.65697	3.89213		3.89213	7.86228	30.5492	0.05097	2.31161	6.67808	0.60461
		1.71824	3.59066		3.59066	5.09246	25.8172	0.06579	1.63151	10.2723	0.48783
		2.42975	3.68019		3.68019	5.34042	37.7084	0.06784	1.80294	10.5325	0.46336
		1.71275	4.35621		4.35621	6.85072	35.6019	0.07094	2.0629	15.7583	0.40497
		2.28891	2.82328		2.82328	4.81069	37.7084	0.04118	2.28772	5.83864	0.60322
		1.66245	4.29592		4.29592	6.21391	36.4415	0.06565	2.88633	5.11742	0.53566
		1.37986	2.71183		2.71183	5.04456	37.7084	0.05341	2.62215	9.16096	0.40497
		1.96059	2.6625		2.6625	4.37676	38.548	0.05831	2.12472	5.70858	0.46642
		1.82433	3.59066		3.59066	5.91805	42.7763	0.06024	2.42754	4.46715	0.51869
		1.97065	3.10648		3.10648	5.54329	42.181	0.05239	2.13245	3.87599	0.47865
		2.60717	3.18687		3.18687	6.228	33.8312	0.04738	2.24135	3.22571	0.50952
		1.65697	5.81058		5.81058	7.17758	41.9215	0.06784	2.44721	4.07698	0.53871
		0.33363	3.67105		3.67105	5.24743	25.9087	0.06744	2.50131	4.98737	0.58154
		0.2376	0.84454		0.84454	1.15328	27.0078	0.03861	1.302	4.91643	0.09021
		1.27377	1.05648		1.05648	1.09129	36.1972	0.04041	1.76781	21.6463	0.12385
		1.24268	2.20755		2.20755	4.17388	33.4953	0.06411	2.88633	22.6867	0.57403
		1.24268	2.51085		2.51085	3.9231	39.6471	0.06178	2.39662	8.64074	0.61852
		1.27377	2.70269		2.70269	4.23587	39.067	0.06551	1.92308	7.26924	0.42944
		1.51613	2.81232		2.81232	4.99947	33.6633	0.05484	1.88444	7.34018	0.48477
		1.27835	1.72337		1.72337	4.53173	39.3112	0.07942	1.04907	6.48891	0.48477
		1.08629	2.47979		2.47979	3.73713	31.2209	0.06204	1.51137	13.7365	0.50952
