# Supplementary material for: Basic chemical compositions combination rules and quantitative criterion of red beds
Source: Copernicus journal article supplement (doi:10.5194/egusphere-2023-2590), 2024-01-29
Supplement: Supplementary file 14 [file Supplementary Table 8-marble_EarthChem.xlsx]

## Sheet: Data
EarthChem Download: Friday, May. 12, 2023 7:20:35 am
Search Criteria:
Material	metamorphic
Rock Name	marble
SAMPLE ID	IGSN	SOURCE	DOI	TITLE	JOURNAL	AUTHOR	CRUISEID	LATITUDE	LONGITUDE	LOC PREC	MIN AGE	AGE	MAX AGE	METHOD	MATERIAL	TYPE	COMPOSITION	ROCK NAME	MINERAL	SIO2	TIO2	AL2O3	FE2O3	FE2O3T	FEO	FEOT	MNO	MGO	CAO	SRO	NA2O	K2O	P2O5	BAO	LOI	H2O_M	H2O_P	V2O5	SI	FE	MN	NI	CO	CU	CD	ZN	AS	AG	AL
VS98A-22		GEOROC	10.1016/S0377-0273(01)00231-1	MAGMA CONTAMINATION BY DIRECT WALL ROCK INTERACTION: CONSTRAINTS FROM XENOLITHS FROM THE WALLS OF A CARBONATE-HOSTED MAGMA CHAMBER (VESUVIUS 1944 ERUPTION)	J. VOLCANOL. GEOTHERM. RES.	DEL MORO, A.; FULIGNATI, P.; MARIANELLI, P.; SBRANA, A.		40.821	14.426	0.001				ICPMS	METAMORPHIC			MARBLE																								16	2
VS98A-22		GEOROC	10.1016/S0377-0273(01)00231-1	MAGMA CONTAMINATION BY DIRECT WALL ROCK INTERACTION: CONSTRAINTS FROM XENOLITHS FROM THE WALLS OF A CARBONATE-HOSTED MAGMA CHAMBER (VESUVIUS 1944 ERUPTION)	J. VOLCANOL. GEOTHERM. RES.	DEL MORO, A.; FULIGNATI, P.; MARIANELLI, P.; SBRANA, A.		40.821	14.426	0.001				TIMS	METAMORPHIC			MARBLE
VS98A-47A		GEOROC	10.1016/S0377-0273(01)00231-1	MAGMA CONTAMINATION BY DIRECT WALL ROCK INTERACTION: CONSTRAINTS FROM XENOLITHS FROM THE WALLS OF A CARBONATE-HOSTED MAGMA CHAMBER (VESUVIUS 1944 ERUPTION)	J. VOLCANOL. GEOTHERM. RES.	DEL MORO, A.; FULIGNATI, P.; MARIANELLI, P.; SBRANA, A.		40.821	14.426	0.001				XRF	METAMORPHIC			MARBLE		2.11	0.07	0.47	0.92				0.03	13.3	45.81		0.05	0.08	0.01											17
VS98A-47A		GEOROC	10.1016/S0377-0273(01)00231-1	MAGMA CONTAMINATION BY DIRECT WALL ROCK INTERACTION: CONSTRAINTS FROM XENOLITHS FROM THE WALLS OF A CARBONATE-HOSTED MAGMA CHAMBER (VESUVIUS 1944 ERUPTION)	J. VOLCANOL. GEOTHERM. RES.	DEL MORO, A.; FULIGNATI, P.; MARIANELLI, P.; SBRANA, A.		40.821	14.426	0.001				ICPMS	METAMORPHIC			MARBLE																								25	5
VS98A-47A		GEOROC	10.1016/S0377-0273(01)00231-1	MAGMA CONTAMINATION BY DIRECT WALL ROCK INTERACTION: CONSTRAINTS FROM XENOLITHS FROM THE WALLS OF A CARBONATE-HOSTED MAGMA CHAMBER (VESUVIUS 1944 ERUPTION)	J. VOLCANOL. GEOTHERM. RES.	DEL MORO, A.; FULIGNATI, P.; MARIANELLI, P.; SBRANA, A.		40.821	14.426	0.001				TIMS	METAMORPHIC			MARBLE
VS98A-47A		GEOROC	10.1016/S0377-0273(01)00231-1	MAGMA CONTAMINATION BY DIRECT WALL ROCK INTERACTION: CONSTRAINTS FROM XENOLITHS FROM THE WALLS OF A CARBONATE-HOSTED MAGMA CHAMBER (VESUVIUS 1944 ERUPTION)	J. VOLCANOL. GEOTHERM. RES.	DEL MORO, A.; FULIGNATI, P.; MARIANELLI, P.; SBRANA, A.		40.821	14.426	0.001				IGN	METAMORPHIC			MARBLE																	37.15
C2		GEOROC	10.1016/S0377-0273(01)00231-1	MAGMA CONTAMINATION BY DIRECT WALL ROCK INTERACTION: CONSTRAINTS FROM XENOLITHS FROM THE WALLS OF A CARBONATE-HOSTED MAGMA CHAMBER (VESUVIUS 1944 ERUPTION)	J. VOLCANOL. GEOTHERM. RES.	DEL MORO, A.; FULIGNATI, P.; MARIANELLI, P.; SBRANA, A.		40.821	14.426	0.001				TIMS	METAMORPHIC			MARBLE
C8		GEOROC	10.1016/S0377-0273(01)00231-1	MAGMA CONTAMINATION BY DIRECT WALL ROCK INTERACTION: CONSTRAINTS FROM XENOLITHS FROM THE WALLS OF A CARBONATE-HOSTED MAGMA CHAMBER (VESUVIUS 1944 ERUPTION)	J. VOLCANOL. GEOTHERM. RES.	DEL MORO, A.; FULIGNATI, P.; MARIANELLI, P.; SBRANA, A.		40.821	14.426	0.001				TIMS	METAMORPHIC			MARBLE
C10		GEOROC	10.1016/S0377-0273(01)00231-1	MAGMA CONTAMINATION BY DIRECT WALL ROCK INTERACTION: CONSTRAINTS FROM XENOLITHS FROM THE WALLS OF A CARBONATE-HOSTED MAGMA CHAMBER (VESUVIUS 1944 ERUPTION)	J. VOLCANOL. GEOTHERM. RES.	DEL MORO, A.; FULIGNATI, P.; MARIANELLI, P.; SBRANA, A.		40.821	14.426	0.001				TIMS	METAMORPHIC			MARBLE
AC-1		GEOROC	10.1007/s007100170015	ISOTOPE GEOCHEMISTRY AND FLUID INCLUSION STUDY OF SKARNS FROM VESUVIUS	MINERAL. PETROL.	GILG, H. A.; LIMA, A.; SOMMA, R.; BELKIN, H. E.; DE VIVO, B.; AYUSO, R. A.		40.821	14.426	0.001				TIMS	METAMORPHIC			MARBLE
S19(3)		GEOROC	10.1007/s007100170015	ISOTOPE GEOCHEMISTRY AND FLUID INCLUSION STUDY OF SKARNS FROM VESUVIUS	MINERAL. PETROL.	GILG, H. A.; LIMA, A.; SOMMA, R.; BELKIN, H. E.; DE VIVO, B.; AYUSO, R. A.		40.821	14.426	0.001				TIMS	METAMORPHIC			MARBLE
8		GEOROC		THE RB-SR ISOTOPE GEOCHEMISTRY OF THE METAMORPHOSED BIMODAL VOLCANIC ASSOCIATION OF THE RYCHORY MTS CRYSTALLINE COMPLEX, WEST SUDETES, BOHEMIAN MASSIF	GEOL. SUDETICA	BENDL, J.; PATOCKA, F.		50.67	15.87	0.01				XRF	METAMORPHIC			MARBLE
8		GEOROC		THE RB-SR ISOTOPE GEOCHEMISTRY OF THE METAMORPHOSED BIMODAL VOLCANIC ASSOCIATION OF THE RYCHORY MTS CRYSTALLINE COMPLEX, WEST SUDETES, BOHEMIAN MASSIF	GEOL. SUDETICA	BENDL, J.; PATOCKA, F.		50.67	15.87	0.01				TIMS	METAMORPHIC			MARBLE
KAK3		GEOROC	10.1080/00288306.2004.9515048	RB-SR AGE AND STRONTIUM ISOTOPIC CHARACTERISATION OF THE TORLESSE SUPERGROUP IN CANTERBURY, NEW ZEALAND, AND IMPLICATIONS FOR THE STATUS OF THE RAKAIA TERRANE	NEW ZEALAND J. GEOL. GEOPHYS.	ADAMS, C. J. D.; MAAS, R.		-44.3	-171.1	0.1				TIMS	METAMORPHIC			MARBLE
KAK3		GEOROC	10.1080/00288306.2004.9515048	RB-SR AGE AND STRONTIUM ISOTOPIC CHARACTERISATION OF THE TORLESSE SUPERGROUP IN CANTERBURY, NEW ZEALAND, AND IMPLICATIONS FOR THE STATUS OF THE RAKAIA TERRANE	NEW ZEALAND J. GEOL. GEOPHYS.	ADAMS, C. J. D.; MAAS, R.		-44.3	-171.1	0.1				XRF	METAMORPHIC			MARBLE
PZ-6		GEOROC	10.1016/0377-0273(91)90049-6	OXYGEN ISOTOPE EVIDENCE FOR PAST AND PRESENT HYDROTHERMAL REGIMES OF LONG VALLEY CALDERA, CALIFORNIA	J. VOLCANOL. GEOTHERM. RES.	SMITH, B. M.; SUEMNICHT, G. A.		37.6	-118.8	0.1				MS	METAMORPHIC			MARBLE
PZ-19A		GEOROC	10.1016/0377-0273(91)90049-6	OXYGEN ISOTOPE EVIDENCE FOR PAST AND PRESENT HYDROTHERMAL REGIMES OF LONG VALLEY CALDERA, CALIFORNIA	J. VOLCANOL. GEOTHERM. RES.	SMITH, B. M.; SUEMNICHT, G. A.		37.6	-118.8	0.1				MS	METAMORPHIC			MARBLE
PZ-19B		GEOROC	10.1016/0377-0273(91)90049-6	OXYGEN ISOTOPE EVIDENCE FOR PAST AND PRESENT HYDROTHERMAL REGIMES OF LONG VALLEY CALDERA, CALIFORNIA	J. VOLCANOL. GEOTHERM. RES.	SMITH, B. M.; SUEMNICHT, G. A.		37.6	-118.8	0.1				MS	METAMORPHIC			MARBLE
PZ-19C		GEOROC	10.1016/0377-0273(91)90049-6	OXYGEN ISOTOPE EVIDENCE FOR PAST AND PRESENT HYDROTHERMAL REGIMES OF LONG VALLEY CALDERA, CALIFORNIA	J. VOLCANOL. GEOTHERM. RES.	SMITH, B. M.; SUEMNICHT, G. A.		37.6	-118.8	0.1				MS	METAMORPHIC			MARBLE
TD-3B		GEOROC	10.1016/0301-9268(90)90005-B	ORIGIN OF LATE PRECAMBRIAN INTRUSIVE CARBONATES, EASTERN DESERT OF EGYPT AND SUDAN: C, O AND SR ISOTOPIC EVIDENCE	PREC. RESEARCH	STERN, R. J.; GWINN, C. J.		21.08	33.17	0.01				NOT	METAMORPHIC			MARBLE
TD-3B		GEOROC	10.1016/0301-9268(90)90005-B	ORIGIN OF LATE PRECAMBRIAN INTRUSIVE CARBONATES, EASTERN DESERT OF EGYPT AND SUDAN: C, O AND SR ISOTOPIC EVIDENCE	PREC. RESEARCH	STERN, R. J.; GWINN, C. J.		21.08	33.17	0.01				NOT	METAMORPHIC			MARBLE
S-16		GEOROC	10.1016/0301-9268(90)90005-B	ORIGIN OF LATE PRECAMBRIAN INTRUSIVE CARBONATES, EASTERN DESERT OF EGYPT AND SUDAN: C, O AND SR ISOTOPIC EVIDENCE	PREC. RESEARCH	STERN, R. J.; GWINN, C. J.		20.83	36.33	0.01				NOT	METAMORPHIC			MARBLE
E-78		GEOROC	10.1016/0301-9268(90)90005-B	ORIGIN OF LATE PRECAMBRIAN INTRUSIVE CARBONATES, EASTERN DESERT OF EGYPT AND SUDAN: C, O AND SR ISOTOPIC EVIDENCE	PREC. RESEARCH	STERN, R. J.; GWINN, C. J.		22.38	33.8	0.01				NOT	METAMORPHIC			MARBLE
D-96B		GEOROC	10.1016/0301-9268(90)90005-B	ORIGIN OF LATE PRECAMBRIAN INTRUSIVE CARBONATES, EASTERN DESERT OF EGYPT AND SUDAN: C, O AND SR ISOTOPIC EVIDENCE	PREC. RESEARCH	STERN, R. J.; GWINN, C. J.		22.5	33.83	0.01				NOT	METAMORPHIC			MARBLE
Ch-251		GEOROC	10.1134/S1028334X14030258	ISOTOPE COMPOSITION OF STRONTIUM, CARBON, AND OXYGEN IN MAGNESIAN CARBONATES OF THE ONOT GREENSTONE BELT	DOKL. EARTH SCI.	GOROKHOV, I. M.; DUBININA, E. O.; KUZNETSOV, A. B.; LEVITSKII, V. I.; KONSTANTINOVA, G. V.; TURCHENKO, T. L.; LEVITSKII, I. V.		52.5	102	0.1				TIMS_ID	METAMORPHIC			MARBLE
Ch-251		GEOROC	10.1134/S1028334X14030258	ISOTOPE COMPOSITION OF STRONTIUM, CARBON, AND OXYGEN IN MAGNESIAN CARBONATES OF THE ONOT GREENSTONE BELT	DOKL. EARTH SCI.	GOROKHOV, I. M.; DUBININA, E. O.; KUZNETSOV, A. B.; LEVITSKII, V. I.; KONSTANTINOVA, G. V.; TURCHENKO, T. L.; LEVITSKII, I. V.		52.5	102	0.1				TIMS	METAMORPHIC			MARBLE
Ch-251		GEOROC	10.1134/S1028334X14030258	ISOTOPE COMPOSITION OF STRONTIUM, CARBON, AND OXYGEN IN MAGNESIAN CARBONATES OF THE ONOT GREENSTONE BELT	DOKL. EARTH SCI.	GOROKHOV, I. M.; DUBININA, E. O.; KUZNETSOV, A. B.; LEVITSKII, V. I.; KONSTANTINOVA, G. V.; TURCHENKO, T. L.; LEVITSKII, I. V.		52.5	102	0.1				MS	METAMORPHIC			MARBLE
Ch-251		GEOROC	10.1134/S1028334X14030258	ISOTOPE COMPOSITION OF STRONTIUM, CARBON, AND OXYGEN IN MAGNESIAN CARBONATES OF THE ONOT GREENSTONE BELT	DOKL. EARTH SCI.	GOROKHOV, I. M.; DUBININA, E. O.; KUZNETSOV, A. B.; LEVITSKII, V. I.; KONSTANTINOVA, G. V.; TURCHENKO, T. L.; LEVITSKII, I. V.		52.5	102	0.1				VOL	METAMORPHIC			MARBLE
Ch-251		GEOROC	10.1134/S1028334X14030258	ISOTOPE COMPOSITION OF STRONTIUM, CARBON, AND OXYGEN IN MAGNESIAN CARBONATES OF THE ONOT GREENSTONE BELT	DOKL. EARTH SCI.	GOROKHOV, I. M.; DUBININA, E. O.; KUZNETSOV, A. B.; LEVITSKII, V. I.; KONSTANTINOVA, G. V.; TURCHENKO, T. L.; LEVITSKII, I. V.		52.5	102	0.1				AAS	METAMORPHIC			MARBLE																						0.282	0.023
P-TR-3		GEOROC	10.1007/s00126-002-0327-y	GEOCHEMICAL AND PETROLOGICAL CHARACTERISTICS OF EPPAWALA PHOSPHATE DEPOSITS, SRI LANKA	MINER. DEPOSITA	PITAWALA, A.; SCHIDLOWSKI, M.; DAHANAYAKE, K.; HOFMEISTER, W.		8	80.4	0.1				MS	METAMORPHIC			MARBLE
P-TR-3		GEOROC	10.1007/s00126-002-0327-y	GEOCHEMICAL AND PETROLOGICAL CHARACTERISTICS OF EPPAWALA PHOSPHATE DEPOSITS, SRI LANKA	MINER. DEPOSITA	PITAWALA, A.; SCHIDLOWSKI, M.; DAHANAYAKE, K.; HOFMEISTER, W.		8	80.4	0.1				XRF	METAMORPHIC			MARBLE		3.85	0.02	0.55		0.44			0.05	4.93	49.47		0.05	0.28	0.02
P-TR-3		GEOROC	10.1007/s00126-002-0327-y	GEOCHEMICAL AND PETROLOGICAL CHARACTERISTICS OF EPPAWALA PHOSPHATE DEPOSITS, SRI LANKA	MINER. DEPOSITA	PITAWALA, A.; SCHIDLOWSKI, M.; DAHANAYAKE, K.; HOFMEISTER, W.		8	80.4	0.1				IGN	METAMORPHIC			MARBLE																	41.52
P-TR-3		GEOROC	10.1007/s00126-002-0327-y	GEOCHEMICAL AND PETROLOGICAL CHARACTERISTICS OF EPPAWALA PHOSPHATE DEPOSITS, SRI LANKA	MINER. DEPOSITA	PITAWALA, A.; SCHIDLOWSKI, M.; DAHANAYAKE, K.; HOFMEISTER, W.		8	80.4	0.1				ICPMS	METAMORPHIC			MARBLE
SE-1-1		GEOROC	10.1007/s00126-002-0327-y	GEOCHEMICAL AND PETROLOGICAL CHARACTERISTICS OF EPPAWALA PHOSPHATE DEPOSITS, SRI LANKA	MINER. DEPOSITA	PITAWALA, A.; SCHIDLOWSKI, M.; DAHANAYAKE, K.; HOFMEISTER, W.		8	80.4	0.1				XRF	METAMORPHIC			MARBLE		11.29	0	0.07		0.62			0	4.11	48.47		0.06	0	0.08
SE-1-1		GEOROC	10.1007/s00126-002-0327-y	GEOCHEMICAL AND PETROLOGICAL CHARACTERISTICS OF EPPAWALA PHOSPHATE DEPOSITS, SRI LANKA	MINER. DEPOSITA	PITAWALA, A.; SCHIDLOWSKI, M.; DAHANAYAKE, K.; HOFMEISTER, W.		8	80.4	0.1				IGN	METAMORPHIC			MARBLE																	34.5
SE-1-1		GEOROC	10.1007/s00126-002-0327-y	GEOCHEMICAL AND PETROLOGICAL CHARACTERISTICS OF EPPAWALA PHOSPHATE DEPOSITS, SRI LANKA	MINER. DEPOSITA	PITAWALA, A.; SCHIDLOWSKI, M.; DAHANAYAKE, K.; HOFMEISTER, W.		8	80.4	0.1				ICPMS	METAMORPHIC			MARBLE
MET-MA-1		GEOROC	10.1007/s00126-002-0327-y	GEOCHEMICAL AND PETROLOGICAL CHARACTERISTICS OF EPPAWALA PHOSPHATE DEPOSITS, SRI LANKA	MINER. DEPOSITA	PITAWALA, A.; SCHIDLOWSKI, M.; DAHANAYAKE, K.; HOFMEISTER, W.		7.47	80.62	0.01				XRF	METAMORPHIC			MARBLE		0.72	0	0.12		0.17			0.03	23.19	33.62		0.01	0.06	0.14
MET-MA-1		GEOROC	10.1007/s00126-002-0327-y	GEOCHEMICAL AND PETROLOGICAL CHARACTERISTICS OF EPPAWALA PHOSPHATE DEPOSITS, SRI LANKA	MINER. DEPOSITA	PITAWALA, A.; SCHIDLOWSKI, M.; DAHANAYAKE, K.; HOFMEISTER, W.		7.47	80.62	0.01				IGN	METAMORPHIC			MARBLE																	32.49
MET-MA-1		GEOROC	10.1007/s00126-002-0327-y	GEOCHEMICAL AND PETROLOGICAL CHARACTERISTICS OF EPPAWALA PHOSPHATE DEPOSITS, SRI LANKA	MINER. DEPOSITA	PITAWALA, A.; SCHIDLOWSKI, M.; DAHANAYAKE, K.; HOFMEISTER, W.		7.47	80.62	0.01				ICPMS	METAMORPHIC			MARBLE
MET-AM-4		GEOROC	10.1007/s00126-002-0327-y	GEOCHEMICAL AND PETROLOGICAL CHARACTERISTICS OF EPPAWALA PHOSPHATE DEPOSITS, SRI LANKA	MINER. DEPOSITA	PITAWALA, A.; SCHIDLOWSKI, M.; DAHANAYAKE, K.; HOFMEISTER, W.		7.28	80.64	0.01				XRF	METAMORPHIC			MARBLE		12.45	0.08	1.02		1.03			0.07	4.14	48.57		0.02	0.45	0.18
MET-AM-4		GEOROC	10.1007/s00126-002-0327-y	GEOCHEMICAL AND PETROLOGICAL CHARACTERISTICS OF EPPAWALA PHOSPHATE DEPOSITS, SRI LANKA	MINER. DEPOSITA	PITAWALA, A.; SCHIDLOWSKI, M.; DAHANAYAKE, K.; HOFMEISTER, W.		7.28	80.64	0.01				IGN	METAMORPHIC			MARBLE																	31.09
MET-AM-4		GEOROC	10.1007/s00126-002-0327-y	GEOCHEMICAL AND PETROLOGICAL CHARACTERISTICS OF EPPAWALA PHOSPHATE DEPOSITS, SRI LANKA	MINER. DEPOSITA	PITAWALA, A.; SCHIDLOWSKI, M.; DAHANAYAKE, K.; HOFMEISTER, W.		7.28	80.64	0.01				ICPMS	METAMORPHIC			MARBLE
MET-DIG-3		GEOROC	10.1007/s00126-002-0327-y	GEOCHEMICAL AND PETROLOGICAL CHARACTERISTICS OF EPPAWALA PHOSPHATE DEPOSITS, SRI LANKA	MINER. DEPOSITA	PITAWALA, A.; SCHIDLOWSKI, M.; DAHANAYAKE, K.; HOFMEISTER, W.		7.29	80.73	0.01				MS	METAMORPHIC			MARBLE
MET-DIG-3		GEOROC	10.1007/s00126-002-0327-y	GEOCHEMICAL AND PETROLOGICAL CHARACTERISTICS OF EPPAWALA PHOSPHATE DEPOSITS, SRI LANKA	MINER. DEPOSITA	PITAWALA, A.; SCHIDLOWSKI, M.; DAHANAYAKE, K.; HOFMEISTER, W.		7.29	80.73	0.01				XRF	METAMORPHIC			MARBLE		7.8	0.12	2.67		0.98			0.04	2.74	48.67		0.14	0.08	0.09
MET-DIG-3		GEOROC	10.1007/s00126-002-0327-y	GEOCHEMICAL AND PETROLOGICAL CHARACTERISTICS OF EPPAWALA PHOSPHATE DEPOSITS, SRI LANKA	MINER. DEPOSITA	PITAWALA, A.; SCHIDLOWSKI, M.; DAHANAYAKE, K.; HOFMEISTER, W.		7.29	80.73	0.01				IGN	METAMORPHIC			MARBLE																	34.89
MET-DIG-3		GEOROC	10.1007/s00126-002-0327-y	GEOCHEMICAL AND PETROLOGICAL CHARACTERISTICS OF EPPAWALA PHOSPHATE DEPOSITS, SRI LANKA	MINER. DEPOSITA	PITAWALA, A.; SCHIDLOWSKI, M.; DAHANAYAKE, K.; HOFMEISTER, W.		7.29	80.73	0.01				ICPMS	METAMORPHIC			MARBLE
PT-GU-1		GEOROC	10.1007/s00126-002-0327-y	GEOCHEMICAL AND PETROLOGICAL CHARACTERISTICS OF EPPAWALA PHOSPHATE DEPOSITS, SRI LANKA	MINER. DEPOSITA	PITAWALA, A.; SCHIDLOWSKI, M.; DAHANAYAKE, K.; HOFMEISTER, W.		7.29	80.73	0.01				MS	METAMORPHIC			MARBLE
PT-NA-1		GEOROC	10.1007/s00126-002-0327-y	GEOCHEMICAL AND PETROLOGICAL CHARACTERISTICS OF EPPAWALA PHOSPHATE DEPOSITS, SRI LANKA	MINER. DEPOSITA	PITAWALA, A.; SCHIDLOWSKI, M.; DAHANAYAKE, K.; HOFMEISTER, W.		7.7	80.65	0.01				MS	METAMORPHIC			MARBLE
MET-AM-3		GEOROC	10.1007/s00126-002-0327-y	GEOCHEMICAL AND PETROLOGICAL CHARACTERISTICS OF EPPAWALA PHOSPHATE DEPOSITS, SRI LANKA	MINER. DEPOSITA	PITAWALA, A.; SCHIDLOWSKI, M.; DAHANAYAKE, K.; HOFMEISTER, W.		7.28	80.64	0.01				MS	METAMORPHIC			MARBLE
MET-MA-2		GEOROC	10.1007/s00126-002-0327-y	GEOCHEMICAL AND PETROLOGICAL CHARACTERISTICS OF EPPAWALA PHOSPHATE DEPOSITS, SRI LANKA	MINER. DEPOSITA	PITAWALA, A.; SCHIDLOWSKI, M.; DAHANAYAKE, K.; HOFMEISTER, W.		7.47	80.62	0.01				MS	METAMORPHIC			MARBLE
PT-KEL-1		GEOROC	10.1007/s00126-002-0327-y	GEOCHEMICAL AND PETROLOGICAL CHARACTERISTICS OF EPPAWALA PHOSPHATE DEPOSITS, SRI LANKA	MINER. DEPOSITA	PITAWALA, A.; SCHIDLOWSKI, M.; DAHANAYAKE, K.; HOFMEISTER, W.		8	80.4	0.1				MS	METAMORPHIC			MARBLE
PT-SE-2		GEOROC	10.1007/s00126-002-0327-y	GEOCHEMICAL AND PETROLOGICAL CHARACTERISTICS OF EPPAWALA PHOSPHATE DEPOSITS, SRI LANKA	MINER. DEPOSITA	PITAWALA, A.; SCHIDLOWSKI, M.; DAHANAYAKE, K.; HOFMEISTER, W.		8	80.4	0.1				MS	METAMORPHIC			MARBLE
PT-SE-5		GEOROC	10.1007/s00126-002-0327-y	GEOCHEMICAL AND PETROLOGICAL CHARACTERISTICS OF EPPAWALA PHOSPHATE DEPOSITS, SRI LANKA	MINER. DEPOSITA	PITAWALA, A.; SCHIDLOWSKI, M.; DAHANAYAKE, K.; HOFMEISTER, W.		8	80.4	0.1				MS	METAMORPHIC			MARBLE
PT-SE-1		GEOROC	10.1007/s00126-002-0327-y	GEOCHEMICAL AND PETROLOGICAL CHARACTERISTICS OF EPPAWALA PHOSPHATE DEPOSITS, SRI LANKA	MINER. DEPOSITA	PITAWALA, A.; SCHIDLOWSKI, M.; DAHANAYAKE, K.; HOFMEISTER, W.		8	80.4	0.1				MS	METAMORPHIC			MARBLE
PT-MP-1		GEOROC	10.1007/s00126-002-0327-y	GEOCHEMICAL AND PETROLOGICAL CHARACTERISTICS OF EPPAWALA PHOSPHATE DEPOSITS, SRI LANKA	MINER. DEPOSITA	PITAWALA, A.; SCHIDLOWSKI, M.; DAHANAYAKE, K.; HOFMEISTER, W.		8	80.4	0.1				MS	METAMORPHIC			MARBLE
MARBLE		GEOROC	10.1134/S1028334X21120084	GEOCHEMISTRY, FORMATION SETTINGS, AND ORE POTENTIAL OF THE VOLCANO-SEDIMENTARY COMPLEXES OF PRYANGARYA, YENISEI RIDGE	DOKL. EARTH SCI.	NOZHKIN, A. D.; KOZLOV, P. S.; LIKHANOV, I. I.; REVERDATTO, V. V.; KRYLOV, A. A.		58	93.5	0.01				NOT	METAMORPHIC			MARBLE		18.66	0.17	3.01		4.56			0.29	6.72	34.01		0.62	0.05	0.04		31.7							131	25
SP10-27		GEOROC	10.1016/j.chemgeo.2015.02.020	INTEGRATED O-SR-ND ISOTOPE CONSTRAINTS ON THE EVOLUTION OF FOUR IMPORTANT FE-TI OXIDE ORE-BEARING MAFIC-ULTRAMAFIC INTRUSIONS IN THE EMEISHAN LARGE IGNEOUS PROVINCE, SW CHINA	CHEM. GEOL.	YU, SONG-YUE; SONG, XIE-YAN; RIPLEY, E. M.; LI, CHUSI; CHEN, LIE-MENG; SHE, YU-WEI; LUAN, YAN		26.5806	101.624	0.0001				MS	METAMORPHIC			MARBLE
SP10-27		GEOROC	10.1016/j.chemgeo.2015.02.020	INTEGRATED O-SR-ND ISOTOPE CONSTRAINTS ON THE EVOLUTION OF FOUR IMPORTANT FE-TI OXIDE ORE-BEARING MAFIC-ULTRAMAFIC INTRUSIONS IN THE EMEISHAN LARGE IGNEOUS PROVINCE, SW CHINA	CHEM. GEOL.	YU, SONG-YUE; SONG, XIE-YAN; RIPLEY, E. M.; LI, CHUSI; CHEN, LIE-MENG; SHE, YU-WEI; LUAN, YAN		26.5806	101.624	0.0001				XRF	METAMORPHIC			MARBLE		0.08	0	0.01		0.04			0	23.7	34.7		0	0	0
SP10-27		GEOROC	10.1016/j.chemgeo.2015.02.020	INTEGRATED O-SR-ND ISOTOPE CONSTRAINTS ON THE EVOLUTION OF FOUR IMPORTANT FE-TI OXIDE ORE-BEARING MAFIC-ULTRAMAFIC INTRUSIONS IN THE EMEISHAN LARGE IGNEOUS PROVINCE, SW CHINA	CHEM. GEOL.	YU, SONG-YUE; SONG, XIE-YAN; RIPLEY, E. M.; LI, CHUSI; CHEN, LIE-MENG; SHE, YU-WEI; LUAN, YAN		26.5806	101.624	0.0001				IGN	METAMORPHIC			MARBLE																	40.76
SP10-27		GEOROC	10.1016/j.chemgeo.2015.02.020	INTEGRATED O-SR-ND ISOTOPE CONSTRAINTS ON THE EVOLUTION OF FOUR IMPORTANT FE-TI OXIDE ORE-BEARING MAFIC-ULTRAMAFIC INTRUSIONS IN THE EMEISHAN LARGE IGNEOUS PROVINCE, SW CHINA	CHEM. GEOL.	YU, SONG-YUE; SONG, XIE-YAN; RIPLEY, E. M.; LI, CHUSI; CHEN, LIE-MENG; SHE, YU-WEI; LUAN, YAN		26.5806	101.624	0.0001				ICPMS	METAMORPHIC			MARBLE																								1.89987	0.525198
SP10-28		GEOROC	10.1016/j.chemgeo.2015.02.020	INTEGRATED O-SR-ND ISOTOPE CONSTRAINTS ON THE EVOLUTION OF FOUR IMPORTANT FE-TI OXIDE ORE-BEARING MAFIC-ULTRAMAFIC INTRUSIONS IN THE EMEISHAN LARGE IGNEOUS PROVINCE, SW CHINA	CHEM. GEOL.	YU, SONG-YUE; SONG, XIE-YAN; RIPLEY, E. M.; LI, CHUSI; CHEN, LIE-MENG; SHE, YU-WEI; LUAN, YAN		26.5806	101.624	0.0001				MS	METAMORPHIC			MARBLE
SP10-28		GEOROC	10.1016/j.chemgeo.2015.02.020	INTEGRATED O-SR-ND ISOTOPE CONSTRAINTS ON THE EVOLUTION OF FOUR IMPORTANT FE-TI OXIDE ORE-BEARING MAFIC-ULTRAMAFIC INTRUSIONS IN THE EMEISHAN LARGE IGNEOUS PROVINCE, SW CHINA	CHEM. GEOL.	YU, SONG-YUE; SONG, XIE-YAN; RIPLEY, E. M.; LI, CHUSI; CHEN, LIE-MENG; SHE, YU-WEI; LUAN, YAN		26.5806	101.624	0.0001				XRF	METAMORPHIC			MARBLE		1.1	0	0.03		0.09			0.01	23.8	34.3		0	0	0
SP10-28		GEOROC	10.1016/j.chemgeo.2015.02.020	INTEGRATED O-SR-ND ISOTOPE CONSTRAINTS ON THE EVOLUTION OF FOUR IMPORTANT FE-TI OXIDE ORE-BEARING MAFIC-ULTRAMAFIC INTRUSIONS IN THE EMEISHAN LARGE IGNEOUS PROVINCE, SW CHINA	CHEM. GEOL.	YU, SONG-YUE; SONG, XIE-YAN; RIPLEY, E. M.; LI, CHUSI; CHEN, LIE-MENG; SHE, YU-WEI; LUAN, YAN		26.5806	101.624	0.0001				IGN	METAMORPHIC			MARBLE																	39.95
SP10-28		GEOROC	10.1016/j.chemgeo.2015.02.020	INTEGRATED O-SR-ND ISOTOPE CONSTRAINTS ON THE EVOLUTION OF FOUR IMPORTANT FE-TI OXIDE ORE-BEARING MAFIC-ULTRAMAFIC INTRUSIONS IN THE EMEISHAN LARGE IGNEOUS PROVINCE, SW CHINA	CHEM. GEOL.	YU, SONG-YUE; SONG, XIE-YAN; RIPLEY, E. M.; LI, CHUSI; CHEN, LIE-MENG; SHE, YU-WEI; LUAN, YAN		26.5806	101.624	0.0001				ICPMS	METAMORPHIC			MARBLE																								2.22678	0.503069
SP10-28		GEOROC	10.1016/j.chemgeo.2015.02.020	INTEGRATED O-SR-ND ISOTOPE CONSTRAINTS ON THE EVOLUTION OF FOUR IMPORTANT FE-TI OXIDE ORE-BEARING MAFIC-ULTRAMAFIC INTRUSIONS IN THE EMEISHAN LARGE IGNEOUS PROVINCE, SW CHINA	CHEM. GEOL.	YU, SONG-YUE; SONG, XIE-YAN; RIPLEY, E. M.; LI, CHUSI; CHEN, LIE-MENG; SHE, YU-WEI; LUAN, YAN		26.5806	101.624	0.0001				MS	METAMORPHIC			MARBLE
SP10-29		GEOROC	10.1016/j.chemgeo.2015.02.020	INTEGRATED O-SR-ND ISOTOPE CONSTRAINTS ON THE EVOLUTION OF FOUR IMPORTANT FE-TI OXIDE ORE-BEARING MAFIC-ULTRAMAFIC INTRUSIONS IN THE EMEISHAN LARGE IGNEOUS PROVINCE, SW CHINA	CHEM. GEOL.	YU, SONG-YUE; SONG, XIE-YAN; RIPLEY, E. M.; LI, CHUSI; CHEN, LIE-MENG; SHE, YU-WEI; LUAN, YAN		26.5806	101.624	0.0001				MS	METAMORPHIC			MARBLE
SP10-29		GEOROC	10.1016/j.chemgeo.2015.02.020	INTEGRATED O-SR-ND ISOTOPE CONSTRAINTS ON THE EVOLUTION OF FOUR IMPORTANT FE-TI OXIDE ORE-BEARING MAFIC-ULTRAMAFIC INTRUSIONS IN THE EMEISHAN LARGE IGNEOUS PROVINCE, SW CHINA	CHEM. GEOL.	YU, SONG-YUE; SONG, XIE-YAN; RIPLEY, E. M.; LI, CHUSI; CHEN, LIE-MENG; SHE, YU-WEI; LUAN, YAN		26.5806	101.624	0.0001				XRF	METAMORPHIC			MARBLE		2.44	0.03	0.21		0.23			0.01	23.6	33.7		0	0	0
SP10-29		GEOROC	10.1016/j.chemgeo.2015.02.020	INTEGRATED O-SR-ND ISOTOPE CONSTRAINTS ON THE EVOLUTION OF FOUR IMPORTANT FE-TI OXIDE ORE-BEARING MAFIC-ULTRAMAFIC INTRUSIONS IN THE EMEISHAN LARGE IGNEOUS PROVINCE, SW CHINA	CHEM. GEOL.	YU, SONG-YUE; SONG, XIE-YAN; RIPLEY, E. M.; LI, CHUSI; CHEN, LIE-MENG; SHE, YU-WEI; LUAN, YAN		26.5806	101.624	0.0001				IGN	METAMORPHIC			MARBLE																	39.05
SP10-29		GEOROC	10.1016/j.chemgeo.2015.02.020	INTEGRATED O-SR-ND ISOTOPE CONSTRAINTS ON THE EVOLUTION OF FOUR IMPORTANT FE-TI OXIDE ORE-BEARING MAFIC-ULTRAMAFIC INTRUSIONS IN THE EMEISHAN LARGE IGNEOUS PROVINCE, SW CHINA	CHEM. GEOL.	YU, SONG-YUE; SONG, XIE-YAN; RIPLEY, E. M.; LI, CHUSI; CHEN, LIE-MENG; SHE, YU-WEI; LUAN, YAN		26.5806	101.624	0.0001				ICPMS	METAMORPHIC			MARBLE																								2.5787	1.05892
PN11-115		GEOROC	10.1016/j.chemgeo.2015.02.020	INTEGRATED O-SR-ND ISOTOPE CONSTRAINTS ON THE EVOLUTION OF FOUR IMPORTANT FE-TI OXIDE ORE-BEARING MAFIC-ULTRAMAFIC INTRUSIONS IN THE EMEISHAN LARGE IGNEOUS PROVINCE, SW CHINA	CHEM. GEOL.	YU, SONG-YUE; SONG, XIE-YAN; RIPLEY, E. M.; LI, CHUSI; CHEN, LIE-MENG; SHE, YU-WEI; LUAN, YAN		26.5806	101.624	0.0001				MS	METAMORPHIC			MARBLE
PN11-115		GEOROC	10.1016/j.chemgeo.2015.02.020	INTEGRATED O-SR-ND ISOTOPE CONSTRAINTS ON THE EVOLUTION OF FOUR IMPORTANT FE-TI OXIDE ORE-BEARING MAFIC-ULTRAMAFIC INTRUSIONS IN THE EMEISHAN LARGE IGNEOUS PROVINCE, SW CHINA	CHEM. GEOL.	YU, SONG-YUE; SONG, XIE-YAN; RIPLEY, E. M.; LI, CHUSI; CHEN, LIE-MENG; SHE, YU-WEI; LUAN, YAN		26.5806	101.624	0.0001				XRF	METAMORPHIC			MARBLE		8.72	0.08	0.56		0.545969			0	19.65	31.21		0	0.01	0
PN11-115		GEOROC	10.1016/j.chemgeo.2015.02.020	INTEGRATED O-SR-ND ISOTOPE CONSTRAINTS ON THE EVOLUTION OF FOUR IMPORTANT FE-TI OXIDE ORE-BEARING MAFIC-ULTRAMAFIC INTRUSIONS IN THE EMEISHAN LARGE IGNEOUS PROVINCE, SW CHINA	CHEM. GEOL.	YU, SONG-YUE; SONG, XIE-YAN; RIPLEY, E. M.; LI, CHUSI; CHEN, LIE-MENG; SHE, YU-WEI; LUAN, YAN		26.5806	101.624	0.0001				IGN	METAMORPHIC			MARBLE																	38.2
PN11-115		GEOROC	10.1016/j.chemgeo.2015.02.020	INTEGRATED O-SR-ND ISOTOPE CONSTRAINTS ON THE EVOLUTION OF FOUR IMPORTANT FE-TI OXIDE ORE-BEARING MAFIC-ULTRAMAFIC INTRUSIONS IN THE EMEISHAN LARGE IGNEOUS PROVINCE, SW CHINA	CHEM. GEOL.	YU, SONG-YUE; SONG, XIE-YAN; RIPLEY, E. M.; LI, CHUSI; CHEN, LIE-MENG; SHE, YU-WEI; LUAN, YAN		26.5806	101.624	0.0001				ICPMS	METAMORPHIC			MARBLE																								22.9777	5.56
SP10-2		GEOROC	10.1016/j.chemgeo.2015.02.020	INTEGRATED O-SR-ND ISOTOPE CONSTRAINTS ON THE EVOLUTION OF FOUR IMPORTANT FE-TI OXIDE ORE-BEARING MAFIC-ULTRAMAFIC INTRUSIONS IN THE EMEISHAN LARGE IGNEOUS PROVINCE, SW CHINA	CHEM. GEOL.	YU, SONG-YUE; SONG, XIE-YAN; RIPLEY, E. M.; LI, CHUSI; CHEN, LIE-MENG; SHE, YU-WEI; LUAN, YAN		26.5806	101.624	0.0001				XRF	METAMORPHIC			MARBLE		0.61	0	0.03		0.1			0.01	23.7	34.76		0	0.01	0.005
SP10-2		GEOROC	10.1016/j.chemgeo.2015.02.020	INTEGRATED O-SR-ND ISOTOPE CONSTRAINTS ON THE EVOLUTION OF FOUR IMPORTANT FE-TI OXIDE ORE-BEARING MAFIC-ULTRAMAFIC INTRUSIONS IN THE EMEISHAN LARGE IGNEOUS PROVINCE, SW CHINA	CHEM. GEOL.	YU, SONG-YUE; SONG, XIE-YAN; RIPLEY, E. M.; LI, CHUSI; CHEN, LIE-MENG; SHE, YU-WEI; LUAN, YAN		26.5806	101.624	0.0001				IGN	METAMORPHIC			MARBLE																	39.1
SP10-2		GEOROC	10.1016/j.chemgeo.2015.02.020	INTEGRATED O-SR-ND ISOTOPE CONSTRAINTS ON THE EVOLUTION OF FOUR IMPORTANT FE-TI OXIDE ORE-BEARING MAFIC-ULTRAMAFIC INTRUSIONS IN THE EMEISHAN LARGE IGNEOUS PROVINCE, SW CHINA	CHEM. GEOL.	YU, SONG-YUE; SONG, XIE-YAN; RIPLEY, E. M.; LI, CHUSI; CHEN, LIE-MENG; SHE, YU-WEI; LUAN, YAN		26.5806	101.624	0.0001				ICPMS	METAMORPHIC			MARBLE																								8.38	0.982
WJ 341		GEOROC		THE CARBONATITES OF SOUTH AFRICA AND SOUTH WEST AFRICA	GEOL. SURV. DEPT. MINES REP. S. AFR. HANDBODE	VERWOERD, W. J.		-20.45	16.35	0.01				NOT	METAMORPHIC			MARBLE		3.94	0.18	0.57	0.52		0.72		0.09	2.99	49.1	0.02	0.35	0.27	0.53	0.88		0.06	0.06
MB-83		GEOROC	10.1016/j.jafrearsci.2018.05.012	ZIRCON U-PB GEOCHRONOLOGY AND ND ISOTOPE SYSTEMATICS OF THE GURO SUITE GRANITOIDS, MOZAMBIQUE: IMPLICATIONS FOR NEOPROTEROZOIC CRUST REWORKING EVENTS	J. AFR. EARTH SCI.	MANJATE, V. A.; TASSINARI, C. C. G.		-17	33	0.1				XRF	METAMORPHIC			MARBLE		65.6	0.848	12.82		7.51			0.099	0.33	2.41		3.6	5.21	0.172									0	0	0		58
MB-83		GEOROC	10.1016/j.jafrearsci.2018.05.012	ZIRCON U-PB GEOCHRONOLOGY AND ND ISOTOPE SYSTEMATICS OF THE GURO SUITE GRANITOIDS, MOZAMBIQUE: IMPLICATIONS FOR NEOPROTEROZOIC CRUST REWORKING EVENTS	J. AFR. EARTH SCI.	MANJATE, V. A.; TASSINARI, C. C. G.		-17	33	0.1				IGN	METAMORPHIC			MARBLE																	0.24
MB-83		GEOROC	10.1016/j.jafrearsci.2018.05.012	ZIRCON U-PB GEOCHRONOLOGY AND ND ISOTOPE SYSTEMATICS OF THE GURO SUITE GRANITOIDS, MOZAMBIQUE: IMPLICATIONS FOR NEOPROTEROZOIC CRUST REWORKING EVENTS	J. AFR. EARTH SCI.	MANJATE, V. A.; TASSINARI, C. C. G.		-17	33	0.1				ICPMS	METAMORPHIC			MARBLE
MB-83		GEOROC	10.1016/j.jafrearsci.2018.05.012	ZIRCON U-PB GEOCHRONOLOGY AND ND ISOTOPE SYSTEMATICS OF THE GURO SUITE GRANITOIDS, MOZAMBIQUE: IMPLICATIONS FOR NEOPROTEROZOIC CRUST REWORKING EVENTS	J. AFR. EARTH SCI.	MANJATE, V. A.; TASSINARI, C. C. G.		-17	33	0.1				TIMS_ID	METAMORPHIC			MARBLE
MB-83		GEOROC	10.1016/j.jafrearsci.2018.05.012	ZIRCON U-PB GEOCHRONOLOGY AND ND ISOTOPE SYSTEMATICS OF THE GURO SUITE GRANITOIDS, MOZAMBIQUE: IMPLICATIONS FOR NEOPROTEROZOIC CRUST REWORKING EVENTS	J. AFR. EARTH SCI.	MANJATE, V. A.; TASSINARI, C. C. G.		-17	33	0.1				TIMS	METAMORPHIC			MARBLE
MB-84		GEOROC	10.1016/j.jafrearsci.2018.05.012	ZIRCON U-PB GEOCHRONOLOGY AND ND ISOTOPE SYSTEMATICS OF THE GURO SUITE GRANITOIDS, MOZAMBIQUE: IMPLICATIONS FOR NEOPROTEROZOIC CRUST REWORKING EVENTS	J. AFR. EARTH SCI.	MANJATE, V. A.; TASSINARI, C. C. G.		-17	33	0.1				ICPMS	METAMORPHIC			MARBLE
MB-84		GEOROC	10.1016/j.jafrearsci.2018.05.012	ZIRCON U-PB GEOCHRONOLOGY AND ND ISOTOPE SYSTEMATICS OF THE GURO SUITE GRANITOIDS, MOZAMBIQUE: IMPLICATIONS FOR NEOPROTEROZOIC CRUST REWORKING EVENTS	J. AFR. EARTH SCI.	MANJATE, V. A.; TASSINARI, C. C. G.		-17	33	0.1				TIMS	METAMORPHIC			MARBLE
MB-84		GEOROC	10.1016/j.jafrearsci.2018.05.012	ZIRCON U-PB GEOCHRONOLOGY AND ND ISOTOPE SYSTEMATICS OF THE GURO SUITE GRANITOIDS, MOZAMBIQUE: IMPLICATIONS FOR NEOPROTEROZOIC CRUST REWORKING EVENTS	J. AFR. EARTH SCI.	MANJATE, V. A.; TASSINARI, C. C. G.		-17	33	0.1				TIMS_ID	METAMORPHIC			MARBLE
MB-84		GEOROC	10.1016/j.jafrearsci.2018.05.012	ZIRCON U-PB GEOCHRONOLOGY AND ND ISOTOPE SYSTEMATICS OF THE GURO SUITE GRANITOIDS, MOZAMBIQUE: IMPLICATIONS FOR NEOPROTEROZOIC CRUST REWORKING EVENTS	J. AFR. EARTH SCI.	MANJATE, V. A.; TASSINARI, C. C. G.		-17	33	0.1				XRF	METAMORPHIC			MARBLE		72.54	0.352	12.05		4.45			0.068	0.01	1.37		2.71	5.29	0.04									0	0	0		109
MB-84		GEOROC	10.1016/j.jafrearsci.2018.05.012	ZIRCON U-PB GEOCHRONOLOGY AND ND ISOTOPE SYSTEMATICS OF THE GURO SUITE GRANITOIDS, MOZAMBIQUE: IMPLICATIONS FOR NEOPROTEROZOIC CRUST REWORKING EVENTS	J. AFR. EARTH SCI.	MANJATE, V. A.; TASSINARI, C. C. G.		-17	33	0.1				IGN	METAMORPHIC			MARBLE																	0.12
ABO215		USGS		Geochemistry of rock samples from the National Geochemical Database: U.S. Geological Survey, Reston, VA.	U.S. Geological Survey	USGS		36.9389	-79.575	0.01				COL	METAMORPHIC	UNKNOWN	UNKNOWN	MARBLE																										75
ABO215		USGS		Geochemistry of rock samples from the National Geochemical Database: U.S. Geological Survey, Reston, VA.	U.S. Geological Survey	USGS		36.9389	-79.575	0.01				ES	METAMORPHIC	UNKNOWN	UNKNOWN	MARBLE																						2	2000			150
ABU190		USGS		Geochemistry of rock samples from the National Geochemical Database: U.S. Geological Survey, Reston, VA.	U.S. Geological Survey	USGS		35.7817	-82.0381	0.01				COL	METAMORPHIC	UNKNOWN	UNKNOWN	MARBLE																										30			10
ABU190		USGS		Geochemistry of rock samples from the National Geochemical Database: U.S. Geological Survey, Reston, VA.	U.S. Geological Survey	USGS		35.7817	-82.0381	0.01				ES	METAMORPHIC	UNKNOWN	UNKNOWN	MARBLE																						1.5	150	7	3	15
ABU191		USGS		Geochemistry of rock samples from the National Geochemical Database: U.S. Geological Survey, Reston, VA.	U.S. Geological Survey	USGS		35.7817	-82.0381	0.01				ES	METAMORPHIC	UNKNOWN	UNKNOWN	MARBLE																						0.7	150			2
ADB133		USGS		Geochemistry of rock samples from the National Geochemical Database: U.S. Geological Survey, Reston, VA.	U.S. Geological Survey	USGS		64.2681	-141.394	0.01				ES	METAMORPHIC	UNKNOWN	UNKNOWN	MARBLE																						3	5000	50	15	7
ADB135		USGS		Geochemistry of rock samples from the National Geochemical Database: U.S. Geological Survey, Reston, VA.	U.S. Geological Survey	USGS		64.3306	-141.4	0.01				ES	METAMORPHIC	UNKNOWN	UNKNOWN	MARBLE																						0.2	200	15		10
ADB136		USGS		Geochemistry of rock samples from the National Geochemical Database: U.S. Geological Survey, Reston, VA.	U.S. Geological Survey	USGS		64.3306	-141.4	0.01				ES	METAMORPHIC	UNKNOWN	UNKNOWN	MARBLE																						3	70	30		20				0.7
ADB276		USGS		Geochemistry of rock samples from the National Geochemical Database: U.S. Geological Survey, Reston, VA.	U.S. Geological Survey	USGS		64.6611	-141.282	0.01				ES	METAMORPHIC	UNKNOWN	UNKNOWN	MARBLE																						0.15	150			7
ADB277		USGS		Geochemistry of rock samples from the National Geochemical Database: U.S. Geological Survey, Reston, VA.	U.S. Geological Survey	USGS		64.6611	-141.282	0.01				ES	METAMORPHIC	UNKNOWN	UNKNOWN	MARBLE																						3	3000	7	7	10
AEY835		USGS		Geochemistry of rock samples from the National Geochemical Database: U.S. Geological Survey, Reston, VA.	U.S. Geological Survey	USGS		35.6461	-81.0733	0.01				AAS	METAMORPHIC	UNKNOWN	UNKNOWN	MARBLE																										40
AEY835		USGS		Geochemistry of rock samples from the National Geochemical Database: U.S. Geological Survey, Reston, VA.	U.S. Geological Survey	USGS		35.6461	-81.0733	0.01				ES	METAMORPHIC	UNKNOWN	UNKNOWN	MARBLE																						1	1000	10		15
AF582		USGS		Geochemistry of rock samples from the National Geochemical Database: U.S. Geological Survey, Reston, VA.	U.S. Geological Survey	USGS		18.1222	-67.0764	0.01				AAS	METAMORPHIC	UNKNOWN	UNKNOWN	MARBLE																												14
AF582		USGS		Geochemistry of rock samples from the National Geochemical Database: U.S. Geological Survey, Reston, VA.	U.S. Geological Survey	USGS		18.1222	-67.0764	0.01				ES	METAMORPHIC	UNKNOWN	UNKNOWN	MARBLE																						0.5	300			70
AFI630		USGS		Geochemistry of rock samples from the National Geochemical Database: U.S. Geological Survey, Reston, VA.	U.S. Geological Survey	USGS		31.7628	-110.766	0.01				AAS	METAMORPHIC	UNKNOWN	UNKNOWN	MARBLE
AFI630		USGS		Geochemistry of rock samples from the National Geochemical Database: U.S. Geological Survey, Reston, VA.	U.S. Geological Survey	USGS		31.7628	-110.766	0.01				ES	METAMORPHIC	UNKNOWN	UNKNOWN	MARBLE																						10	1000	15	10	70				1
AFI632		USGS		Geochemistry of rock samples from the National Geochemical Database: U.S. Geological Survey, Reston, VA.	U.S. Geological Survey	USGS		31.7478	-110.765	0.01				AAS	METAMORPHIC	UNKNOWN	UNKNOWN	MARBLE																													20
AFI632		USGS		Geochemistry of rock samples from the National Geochemical Database: U.S. Geological Survey, Reston, VA.	U.S. Geological Survey	USGS		31.7478	-110.765	0.01				ES	METAMORPHIC	UNKNOWN	UNKNOWN	MARBLE																						15	300	5	5	500				3
AGB359		USGS		Geochemistry of rock samples from the National Geochemical Database: U.S. Geological Survey, Reston, VA.	U.S. Geological Survey	USGS		58.5948	-134.577	0.01				ES	METAMORPHIC	UNKNOWN	UNKNOWN	MARBLE																						0.3	300
AGG342		USGS		Geochemistry of rock samples from the National Geochemical Database: U.S. Geological Survey, Reston, VA.	U.S. Geological Survey	USGS		62.1839	-142.499	0.01				ES	METAMORPHIC	UNKNOWN	UNKNOWN	MARBLE																						15	5000	7		5
AGH206		USGS		Geochemistry of rock samples from the National Geochemical Database: U.S. Geological Survey, Reston, VA.	U.S. Geological Survey	USGS		64.3403	-142.319	0.01				ES	METAMORPHIC	UNKNOWN	UNKNOWN	MARBLE																							150
AGH217		USGS		Geochemistry of rock samples from the National Geochemical Database: U.S. Geological Survey, Reston, VA.	U.S. Geological Survey	USGS		64.0908	-143.031	0.01				AAS	METAMORPHIC	UNKNOWN	UNKNOWN	MARBLE
AGH217		USGS		Geochemistry of rock samples from the National Geochemical Database: U.S. Geological Survey, Reston, VA.	U.S. Geological Survey	USGS		64.0908	-143.031	0.01				ES	METAMORPHIC	UNKNOWN	UNKNOWN	MARBLE																						10		70	20			300		150
AGH219		USGS		Geochemistry of rock samples from the National Geochemical Database: U.S. Geological Survey, Reston, VA.	U.S. Geological Survey	USGS		64.0908	-143.031	0.01				AAS	METAMORPHIC	UNKNOWN	UNKNOWN	MARBLE
AGH219		USGS		Geochemistry of rock samples from the National Geochemical Database: U.S. Geological Survey, Reston, VA.	U.S. Geological Survey	USGS		64.0908	-143.031	0.01				ES	METAMORPHIC	UNKNOWN	UNKNOWN	MARBLE																						7	3000	50	15	20000		1500		50
AGH661		USGS		Geochemistry of rock samples from the National Geochemical Database: U.S. Geological Survey, Reston, VA.	U.S. Geological Survey	USGS		65.1778	-142.675	0.01				AAS	METAMORPHIC	UNKNOWN	UNKNOWN	MARBLE
AGH661		USGS		Geochemistry of rock samples from the National Geochemical Database: U.S. Geological Survey, Reston, VA.	U.S. Geological Survey	USGS		65.1778	-142.675	0.01				ES	METAMORPHIC	UNKNOWN	UNKNOWN	MARBLE																						15	300							7
AGH715		USGS		Geochemistry of rock samples from the National Geochemical Database: U.S. Geological Survey, Reston, VA.	U.S. Geological Survey	USGS		64.9375	-142.397	0.01				ES	METAMORPHIC	UNKNOWN	UNKNOWN	MARBLE																						1.5	700	70		70				0.5
AGH744		USGS		Geochemistry of rock samples from the National Geochemical Database: U.S. Geological Survey, Reston, VA.	U.S. Geological Survey	USGS		64.4375	-141.375	0.01				ES	METAMORPHIC	UNKNOWN	UNKNOWN	MARBLE																						3	1000	7		7
AGH758		USGS		Geochemistry of rock samples from the National Geochemical Database: U.S. Geological Survey, Reston, VA.	U.S. Geological Survey	USGS		64.3278	-141.414	0.01				ES	METAMORPHIC	UNKNOWN	UNKNOWN	MARBLE																						0.5	150
AGH779		USGS		Geochemistry of rock samples from the National Geochemical Database: U.S. Geological Survey, Reston, VA.	U.S. Geological Survey	USGS		64.5553	-141.717	0.01				ES	METAMORPHIC	UNKNOWN	UNKNOWN	MARBLE																						1.5	1000
AHE130		USGS		Geochemistry of rock samples from the National Geochemical Database: U.S. Geological Survey, Reston, VA.	U.S. Geological Survey	USGS		41.0861	-116.611	0.01				AAS	METAMORPHIC	UNKNOWN	UNKNOWN	MARBLE
AHE130		USGS		Geochemistry of rock samples from the National Geochemical Database: U.S. Geological Survey, Reston, VA.	U.S. Geological Survey	USGS		41.0861	-116.611	0.01				COL	METAMORPHIC	UNKNOWN	UNKNOWN	MARBLE																													10
AHE130		USGS		Geochemistry of rock samples from the National Geochemical Database: U.S. Geological Survey, Reston, VA.	U.S. Geological Survey	USGS		41.0861	-116.611	0.01				ES	METAMORPHIC	UNKNOWN	UNKNOWN	MARBLE																						2	500			100
AHE132		USGS		Geochemistry of rock samples from the National Geochemical Database: U.S. Geological Survey, Reston, VA.	U.S. Geological Survey	USGS		41.0772	-116.613	0.01				AAS	METAMORPHIC	UNKNOWN	UNKNOWN	MARBLE
AHE132		USGS		Geochemistry of rock samples from the National Geochemical Database: U.S. Geological Survey, Reston, VA.	U.S. Geological Survey	USGS		41.0772	-116.613	0.01				COL	METAMORPHIC	UNKNOWN	UNKNOWN	MARBLE																													10
AHE132		USGS		Geochemistry of rock samples from the National Geochemical Database: U.S. Geological Survey, Reston, VA.	U.S. Geological Survey	USGS		41.0772	-116.613	0.01				ES	METAMORPHIC	UNKNOWN	UNKNOWN	MARBLE																						1	1500			5
AKB583		USGS		Geochemistry of rock samples from the National Geochemical Database: U.S. Geological Survey, Reston, VA.	U.S. Geological Survey	USGS		64.2783	-143.006	0.01				ES	METAMORPHIC	UNKNOWN	UNKNOWN	MARBLE																						0.2	100	5		5
AKB587		USGS		Geochemistry of rock samples from the National Geochemical Database: U.S. Geological Survey, Reston, VA.	U.S. Geological Survey	USGS		64.5206	-142.248	0.01				ES	METAMORPHIC	UNKNOWN	UNKNOWN	MARBLE																						0.2	100	7		100
AKB867		USGS		Geochemistry of rock samples from the National Geochemical Database: U.S. Geological Survey, Reston, VA.	U.S. Geological Survey	USGS		64.2203	-143.15	0.01				ES	METAMORPHIC	UNKNOWN	UNKNOWN	MARBLE																						15	1500	70	20	30		300
AKB878		USGS		Geochemistry of rock samples from the National Geochemical Database: U.S. Geological Survey, Reston, VA.	U.S. Geological Survey	USGS		64.4878	-143.691	0.01				ES	METAMORPHIC	UNKNOWN	UNKNOWN	MARBLE																						7	1500	30	15
AKB896		USGS		Geochemistry of rock samples from the National Geochemical Database: U.S. Geological Survey, Reston, VA.	U.S. Geological Survey	USGS		64.3811	-143.163	0.01				ES	METAMORPHIC	UNKNOWN	UNKNOWN	MARBLE																						15	1500	5	20	20
AKB928		USGS		Geochemistry of rock samples from the National Geochemical Database: U.S. Geological Survey, Reston, VA.	U.S. Geological Survey	USGS		64.3878	-142.587	0.01				ES	METAMORPHIC	UNKNOWN	UNKNOWN	MARBLE																						1.5	100
AKB929		USGS		Geochemistry of rock samples from the National Geochemical Database: U.S. Geological Survey, Reston, VA.	U.S. Geological Survey	USGS		64.3878	-142.586	0.01				ES	METAMORPHIC	UNKNOWN	UNKNOWN	MARBLE																						1.5	700	20		5
AKF353		USGS		Geochemistry of rock samples from the National Geochemical Database: U.S. Geological Survey, Reston, VA.	U.S. Geological Survey	USGS		40.8114	-117.492	0.01				AAS	METAMORPHIC	UNKNOWN	UNKNOWN	MARBLE																										20		60		1
AKF353		USGS		Geochemistry of rock samples from the National Geochemical Database: U.S. Geological Survey, Reston, VA.	U.S. Geological Survey	USGS		40.8114	-117.492	0.01				COL	METAMORPHIC	UNKNOWN	UNKNOWN	MARBLE																													10
AKF353		USGS		Geochemistry of rock samples from the National Geochemical Database: U.S. Geological Survey, Reston, VA.	U.S. Geological Survey	USGS		40.8114	-117.492	0.01				ES	METAMORPHIC	UNKNOWN	UNKNOWN	MARBLE																						7	5000	20	7	20
AKF362		USGS		Geochemistry of rock samples from the National Geochemical Database: U.S. Geological Survey, Reston, VA.	U.S. Geological Survey	USGS		40.8047	-117.493	0.01				AAS	METAMORPHIC	UNKNOWN	UNKNOWN	MARBLE																										3000	10	4400		8.8
AKF362		USGS		Geochemistry of rock samples from the National Geochemical Database: U.S. Geological Survey, Reston, VA.	U.S. Geological Survey	USGS		40.8047	-117.493	0.01				COL	METAMORPHIC	UNKNOWN	UNKNOWN	MARBLE
AKF362		USGS		Geochemistry of rock samples from the National Geochemical Database: U.S. Geological Survey, Reston, VA.	U.S. Geological Survey	USGS		40.8047	-117.493	0.01				ES	METAMORPHIC	UNKNOWN	UNKNOWN	MARBLE																						3	1500	10	7	2000		700		5
AKF366		USGS		Geochemistry of rock samples from the National Geochemical Database: U.S. Geological Survey, Reston, VA.	U.S. Geological Survey	USGS		40.8047	-117.493	0.01				AAS	METAMORPHIC	UNKNOWN	UNKNOWN	MARBLE																										12000	18	2400		35
AKF366		USGS		Geochemistry of rock samples from the National Geochemical Database: U.S. Geological Survey, Reston, VA.	U.S. Geological Survey	USGS		40.8047	-117.493	0.01				COL	METAMORPHIC	UNKNOWN	UNKNOWN	MARBLE
AKF366		USGS		Geochemistry of rock samples from the National Geochemical Database: U.S. Geological Survey, Reston, VA.	U.S. Geological Survey	USGS		40.8047	-117.493	0.01				ES	METAMORPHIC	UNKNOWN	UNKNOWN	MARBLE																						7	1000	30	50	10000		1000		50
AKF415		USGS		Geochemistry of rock samples from the National Geochemical Database: U.S. Geological Survey, Reston, VA.	U.S. Geological Survey	USGS		40.8078	-117.454	0.01				AAS	METAMORPHIC	UNKNOWN	UNKNOWN	MARBLE																										20				1.4
AKF415		USGS		Geochemistry of rock samples from the National Geochemical Database: U.S. Geological Survey, Reston, VA.	U.S. Geological Survey	USGS		40.8078	-117.454	0.01				COL	METAMORPHIC	UNKNOWN	UNKNOWN	MARBLE
AKF415		USGS		Geochemistry of rock samples from the National Geochemical Database: U.S. Geological Survey, Reston, VA.	U.S. Geological Survey	USGS		40.8078	-117.454	0.01				ES	METAMORPHIC	UNKNOWN	UNKNOWN	MARBLE																						3	5000	20	7	20
AKF416		USGS		Geochemistry of rock samples from the National Geochemical Database: U.S. Geological Survey, Reston, VA.	U.S. Geological Survey	USGS		40.8078	-117.454	0.01				AAS	METAMORPHIC	UNKNOWN	UNKNOWN	MARBLE																										30				3
AKF416		USGS		Geochemistry of rock samples from the National Geochemical Database: U.S. Geological Survey, Reston, VA.	U.S. Geological Survey	USGS		40.8078	-117.454	0.01				COL	METAMORPHIC	UNKNOWN	UNKNOWN	MARBLE
AKF416		USGS		Geochemistry of rock samples from the National Geochemical Database: U.S. Geological Survey, Reston, VA.	U.S. Geological Survey	USGS		40.8078	-117.454	0.01				ES	METAMORPHIC	UNKNOWN	UNKNOWN	MARBLE																						15	700	30	5	10
AKF418		USGS		Geochemistry of rock samples from the National Geochemical Database: U.S. Geological Survey, Reston, VA.	U.S. Geological Survey	USGS		40.8061	-117.455	0.01				AAS	METAMORPHIC	UNKNOWN	UNKNOWN	MARBLE																														2
AKF418		USGS		Geochemistry of rock samples from the National Geochemical Database: U.S. Geological Survey, Reston, VA.	U.S. Geological Survey	USGS		40.8061	-117.455	0.01				COL	METAMORPHIC	UNKNOWN	UNKNOWN	MARBLE
AKF418		USGS		Geochemistry of rock samples from the National Geochemical Database: U.S. Geological Survey, Reston, VA.	U.S. Geological Survey	USGS		40.8061	-117.455	0.01				ES	METAMORPHIC	UNKNOWN	UNKNOWN	MARBLE																						3	1000	20	7	10
AKF621		USGS		Geochemistry of rock samples from the National Geochemical Database: U.S. Geological Survey, Reston, VA.	U.S. Geological Survey	USGS		40.8342	-117.489	0.01				AAS	METAMORPHIC	UNKNOWN	UNKNOWN	MARBLE																												35		0.6
AKF621		USGS		Geochemistry of rock samples from the National Geochemical Database: U.S. Geological Survey, Reston, VA.	U.S. Geological Survey	USGS		40.8342	-117.489	0.01				COL	METAMORPHIC	UNKNOWN	UNKNOWN	MARBLE
AKF621		USGS		Geochemistry of rock samples from the National Geochemical Database: U.S. Geological Survey, Reston, VA.	U.S. Geological Survey	USGS		40.8342	-117.489	0.01				ES	METAMORPHIC	UNKNOWN	UNKNOWN	MARBLE																						5	1500	50	7	15
AKF623		USGS		Geochemistry of rock samples from the National Geochemical Database: U.S. Geological Survey, Reston, VA.	U.S. Geological Survey	USGS		40.8311	-117.486	0.01				AAS	METAMORPHIC	UNKNOWN	UNKNOWN	MARBLE																												45		0.4
AKF623		USGS		Geochemistry of rock samples from the National Geochemical Database: U.S. Geological Survey, Reston, VA.	U.S. Geological Survey	USGS		40.8311	-117.486	0.01				COL	METAMORPHIC	UNKNOWN	UNKNOWN	MARBLE
AKF623		USGS		Geochemistry of rock samples from the National Geochemical Database: U.S. Geological Survey, Reston, VA.	U.S. Geological Survey	USGS		40.8311	-117.486	0.01				ES	METAMORPHIC	UNKNOWN	UNKNOWN	MARBLE																						3	1000	30	7	30
AKF792		USGS		Geochemistry of rock samples from the National Geochemical Database: U.S. Geological Survey, Reston, VA.	U.S. Geological Survey	USGS		40.8058	-117.468	0.01				COL	METAMORPHIC	UNKNOWN	UNKNOWN	MARBLE																													10
AKF792		USGS		Geochemistry of rock samples from the National Geochemical Database: U.S. Geological Survey, Reston, VA.	U.S. Geological Survey	USGS		40.8058	-117.468	0.01				AAS	METAMORPHIC	UNKNOWN	UNKNOWN	MARBLE																										38		25		1.4
AKF792		USGS		Geochemistry of rock samples from the National Geochemical Database: U.S. Geological Survey, Reston, VA.	U.S. Geological Survey	USGS		40.8058	-117.468	0.01				ES	METAMORPHIC	UNKNOWN	UNKNOWN	MARBLE																						15	1000	15	7	30
BAF102		USGS		Geochemistry of rock samples from the National Geochemical Database: U.S. Geological Survey, Reston, VA.	U.S. Geological Survey	USGS		59.25	-136.125	0.01				ES	METAMORPHIC	UNKNOWN	UNKNOWN	MARBLE																						1.5	300
BAJ049		USGS		Geochemistry of rock samples from the National Geochemical Database: U.S. Geological Survey, Reston, VA.	U.S. Geological Survey	USGS		61.45	-149.217	0.01				AAS	METAMORPHIC	UNKNOWN	UNKNOWN	MARBLE
BAJ049		USGS		Geochemistry of rock samples from the National Geochemical Database: U.S. Geological Survey, Reston, VA.	U.S. Geological Survey	USGS		61.45	-149.217	0.01				ES	METAMORPHIC	UNKNOWN	UNKNOWN	MARBLE																							200			15
BAK030		USGS		Geochemistry of rock samples from the National Geochemical Database: U.S. Geological Survey, Reston, VA.	U.S. Geological Survey	USGS		64.3708	-141.667	0.01				ES	METAMORPHIC	UNKNOWN	UNKNOWN	MARBLE																						1.5	500			7
BAK031		USGS		Geochemistry of rock samples from the National Geochemical Database: U.S. Geological Survey, Reston, VA.	U.S. Geological Survey	USGS		64.368	-141.7	0.01				ES	METAMORPHIC	UNKNOWN	UNKNOWN	MARBLE																						0.3	500	15		20
BAK034		USGS		Geochemistry of rock samples from the National Geochemical Database: U.S. Geological Survey, Reston, VA.	U.S. Geological Survey	USGS		64.3639	-141.738	0.01				ES	METAMORPHIC	UNKNOWN	UNKNOWN	MARBLE																						1.5	700	30		30
BAK132		USGS		Geochemistry of rock samples from the National Geochemical Database: U.S. Geological Survey, Reston, VA.	U.S. Geological Survey	USGS		64.4278	-143.175	0.01				ES	METAMORPHIC	UNKNOWN	UNKNOWN	MARBLE																						3	700	15		20
BAK140		USGS		Geochemistry of rock samples from the National Geochemical Database: U.S. Geological Survey, Reston, VA.	U.S. Geological Survey	USGS		64.4028	-143.122	0.01				ES	METAMORPHIC	UNKNOWN	UNKNOWN	MARBLE																						0.15	70	5		70
BAK486		USGS		Geochemistry of rock samples from the National Geochemical Database: U.S. Geological Survey, Reston, VA.	U.S. Geological Survey	USGS		64.4125	-143.075	0.01				ES	METAMORPHIC	UNKNOWN	UNKNOWN	MARBLE																						3	700	15
BAK488		USGS		Geochemistry of rock samples from the National Geochemical Database: U.S. Geological Survey, Reston, VA.	U.S. Geological Survey	USGS		64.4069	-143.139	0.01				ES	METAMORPHIC	UNKNOWN	UNKNOWN	MARBLE																						3	2000
BAK521		USGS		Geochemistry of rock samples from the National Geochemical Database: U.S. Geological Survey, Reston, VA.	U.S. Geological Survey	USGS		64.3875	-143.062	0.01				ES	METAMORPHIC	UNKNOWN	UNKNOWN	MARBLE																							700
BAK526		USGS		Geochemistry of rock samples from the National Geochemical Database: U.S. Geological Survey, Reston, VA.	U.S. Geological Survey	USGS		64.3903	-143.19	0.01				ES	METAMORPHIC	UNKNOWN	UNKNOWN	MARBLE																						0.7	1000
BAK528		USGS		Geochemistry of rock samples from the National Geochemical Database: U.S. Geological Survey, Reston, VA.	U.S. Geological Survey	USGS		64.3917	-143.183	0.01				ES	METAMORPHIC	UNKNOWN	UNKNOWN	MARBLE																						0.3	150
BAK587		USGS		Geochemistry of rock samples from the National Geochemical Database: U.S. Geological Survey, Reston, VA.	U.S. Geological Survey	USGS		64.2597	-142.358	0.01				ES	METAMORPHIC	UNKNOWN	UNKNOWN	MARBLE																						3	1500	15		30
BAK589		USGS		Geochemistry of rock samples from the National Geochemical Database: U.S. Geological Survey, Reston, VA.	U.S. Geological Survey	USGS		64.2708	-142.372	0.01				ES	METAMORPHIC	UNKNOWN	UNKNOWN	MARBLE																						7	3000	15		30
BAK606		USGS		Geochemistry of rock samples from the National Geochemical Database: U.S. Geological Survey, Reston, VA.	U.S. Geological Survey	USGS		64.2111	-142.283	0.01				ES	METAMORPHIC	UNKNOWN	UNKNOWN	MARBLE																						15	3000	150	50	50
BAK886		USGS		Geochemistry of rock samples from the National Geochemical Database: U.S. Geological Survey, Reston, VA.	U.S. Geological Survey	USGS		64.9542	-142.512	0.01				ES	METAMORPHIC	UNKNOWN	UNKNOWN	MARBLE																						0.2	700			70
BAT980		USGS		Geochemistry of rock samples from the National Geochemical Database: U.S. Geological Survey, Reston, VA.	U.S. Geological Survey	USGS		55	-133	0.01				AAS	METAMORPHIC	UNKNOWN	UNKNOWN	MARBLE
BAT980		USGS		Geochemistry of rock samples from the National Geochemical Database: U.S. Geological Survey, Reston, VA.	U.S. Geological Survey	USGS		55	-133	0.01				ES	METAMORPHIC	UNKNOWN	UNKNOWN	MARBLE																						0.3	1000
BAT984		USGS		Geochemistry of rock samples from the National Geochemical Database: U.S. Geological Survey, Reston, VA.	U.S. Geological Survey	USGS		55	-133	0.01				AAS	METAMORPHIC	UNKNOWN	UNKNOWN	MARBLE
BAT984		USGS		Geochemistry of rock samples from the National Geochemical Database: U.S. Geological Survey, Reston, VA.	U.S. Geological Survey	USGS		55	-133	0.01				ES	METAMORPHIC	UNKNOWN	UNKNOWN	MARBLE																						7	1500	700	30	100				1
BAT992		USGS		Geochemistry of rock samples from the National Geochemical Database: U.S. Geological Survey, Reston, VA.	U.S. Geological Survey	USGS		55	-133	0.01				AAS	METAMORPHIC	UNKNOWN	UNKNOWN	MARBLE
BAT992		USGS		Geochemistry of rock samples from the National Geochemical Database: U.S. Geological Survey, Reston, VA.	U.S. Geological Survey	USGS		55	-133	0.01				ES	METAMORPHIC	UNKNOWN	UNKNOWN	MARBLE																						5	700	70	10	15
BAX198		USGS		Geochemistry of rock samples from the National Geochemical Database: U.S. Geological Survey, Reston, VA.	U.S. Geological Survey	USGS		65.6667	-152.017	0.01				ES	METAMORPHIC	UNKNOWN	UNKNOWN	MARBLE																						0.5	150
BCT021		USGS		Geochemistry of rock samples from the National Geochemical Database: U.S. Geological Survey, Reston, VA.	U.S. Geological Survey	USGS		36.8161	-118.819	0.01				AAS	METAMORPHIC	UNKNOWN	UNKNOWN	MARBLE																										5		10
BCT021		USGS		Geochemistry of rock samples from the National Geochemical Database: U.S. Geological Survey, Reston, VA.	U.S. Geological Survey	USGS		36.8161	-118.819	0.01				ES	METAMORPHIC	UNKNOWN	UNKNOWN	MARBLE																						0.2	300			10
BCT023		USGS		Geochemistry of rock samples from the National Geochemical Database: U.S. Geological Survey, Reston, VA.	U.S. Geological Survey	USGS		36.8144	-118.832	0.01				AAS	METAMORPHIC	UNKNOWN	UNKNOWN	MARBLE																										20		5
BCT023		USGS		Geochemistry of rock samples from the National Geochemical Database: U.S. Geological Survey, Reston, VA.	U.S. Geological Survey	USGS		36.8144	-118.832	0.01				ES	METAMORPHIC	UNKNOWN	UNKNOWN	MARBLE																						2	700	30	10	10
BCT035		USGS		Geochemistry of rock samples from the National Geochemical Database: U.S. Geological Survey, Reston, VA.	U.S. Geological Survey	USGS		36.9139	-118.876	0.01				AAS	METAMORPHIC	UNKNOWN	UNKNOWN	MARBLE																										5		10
BCT035		USGS		Geochemistry of rock samples from the National Geochemical Database: U.S. Geological Survey, Reston, VA.	U.S. Geological Survey	USGS		36.9139	-118.876	0.01				ES	METAMORPHIC	UNKNOWN	UNKNOWN	MARBLE																						0.2	300
BCT043		USGS		Geochemistry of rock samples from the National Geochemical Database: U.S. Geological Survey, Reston, VA.	U.S. Geological Survey	USGS		36.8356	-118.821	0.01				AAS	METAMORPHIC	UNKNOWN	UNKNOWN	MARBLE																										5		5
BCT043		USGS		Geochemistry of rock samples from the National Geochemical Database: U.S. Geological Survey, Reston, VA.	U.S. Geological Survey	USGS		36.8356	-118.821	0.01				ES	METAMORPHIC	UNKNOWN	UNKNOWN	MARBLE																							50
BCT044		USGS		Geochemistry of rock samples from the National Geochemical Database: U.S. Geological Survey, Reston, VA.	U.S. Geological Survey	USGS		36.8356	-118.822	0.01				AAS	METAMORPHIC	UNKNOWN	UNKNOWN	MARBLE																										5		10
BCT044		USGS		Geochemistry of rock samples from the National Geochemical Database: U.S. Geological Survey, Reston, VA.	U.S. Geological Survey	USGS		36.8356	-118.822	0.01				ES	METAMORPHIC	UNKNOWN	UNKNOWN	MARBLE																						0.1	300
BCT061		USGS		Geochemistry of rock samples from the National Geochemical Database: U.S. Geological Survey, Reston, VA.	U.S. Geological Survey	USGS		36.8153	-118.819	0.01				AAS	METAMORPHIC	UNKNOWN	UNKNOWN	MARBLE																										5		10
BCT061		USGS		Geochemistry of rock samples from the National Geochemical Database: U.S. Geological Survey, Reston, VA.	U.S. Geological Survey	USGS		36.8153	-118.819	0.01				ES	METAMORPHIC	UNKNOWN	UNKNOWN	MARBLE																						0.2	200
BCT114		USGS		Geochemistry of rock samples from the National Geochemical Database: U.S. Geological Survey, Reston, VA.	U.S. Geological Survey	USGS		36.8367	-118.836	0.01				AAS	METAMORPHIC	UNKNOWN	UNKNOWN	MARBLE																										5		30
BCT114		USGS		Geochemistry of rock samples from the National Geochemical Database: U.S. Geological Survey, Reston, VA.	U.S. Geological Survey	USGS		36.8367	-118.836	0.01				ES	METAMORPHIC	UNKNOWN	UNKNOWN	MARBLE																						0.3	300
BCT200		USGS		Geochemistry of rock samples from the National Geochemical Database: U.S. Geological Survey, Reston, VA.	U.S. Geological Survey	USGS		41.4667	-73.4058	0.01	43	43	43	ES	METAMORPHIC	UNKNOWN	UNKNOWN	MARBLE																						0.7		5		15				1.5
BCT201		USGS		Geochemistry of rock samples from the National Geochemical Database: U.S. Geological Survey, Reston, VA.	U.S. Geological Survey	USGS		41.4669	-73.4061	0.01	43	43	43	ES	METAMORPHIC	UNKNOWN	UNKNOWN	MARBLE																						1	150	10		7		300
BDB742		USGS		Geochemistry of rock samples from the National Geochemical Database: U.S. Geological Survey, Reston, VA.	U.S. Geological Survey	USGS		55.2864	-131.623	0.01	56	56	56	AAS	METAMORPHIC	UNKNOWN	UNKNOWN	MARBLE
BDB742		USGS		Geochemistry of rock samples from the National Geochemical Database: U.S. Geological Survey, Reston, VA.	U.S. Geological Survey	USGS		55.2864	-131.623	0.01	56	56	56	ES	METAMORPHIC	UNKNOWN	UNKNOWN	MARBLE																						1	5000		15	5
BDN002		USGS		Geochemistry of rock samples from the National Geochemical Database: U.S. Geological Survey, Reston, VA.	U.S. Geological Survey	USGS		64.8111	-165.147	0.01				AAS	METAMORPHIC	UNKNOWN	UNKNOWN	MARBLE
BDN001		USGS		Geochemistry of rock samples from the National Geochemical Database: U.S. Geological Survey, Reston, VA.	U.S. Geological Survey	USGS		64.8175	-165.128	0.01				AAS	METAMORPHIC	UNKNOWN	UNKNOWN	MARBLE
BDN001		USGS		Geochemistry of rock samples from the National Geochemical Database: U.S. Geological Survey, Reston, VA.	U.S. Geological Survey	USGS		64.8175	-165.128	0.01				COL	METAMORPHIC	UNKNOWN	UNKNOWN	MARBLE																													10
BDN001		USGS		Geochemistry of rock samples from the National Geochemical Database: U.S. Geological Survey, Reston, VA.	U.S. Geological Survey	USGS		64.8175	-165.128	0.01				ES	METAMORPHIC	UNKNOWN	UNKNOWN	MARBLE																						0.7	200			20
BDN002		USGS		Geochemistry of rock samples from the National Geochemical Database: U.S. Geological Survey, Reston, VA.	U.S. Geological Survey	USGS		64.8111	-165.147	0.01				ES	METAMORPHIC	UNKNOWN	UNKNOWN	MARBLE																						0.7	200			15
BDN003		USGS		Geochemistry of rock samples from the National Geochemical Database: U.S. Geological Survey, Reston, VA.	U.S. Geological Survey	USGS		64.8472	-165.233	0.01				AAS	METAMORPHIC	UNKNOWN	UNKNOWN	MARBLE
BDN003		USGS		Geochemistry of rock samples from the National Geochemical Database: U.S. Geological Survey, Reston, VA.	U.S. Geological Survey	USGS		64.8472	-165.233	0.01				ES	METAMORPHIC	UNKNOWN	UNKNOWN	MARBLE																						3	700	7		50		300
BDN004		USGS		Geochemistry of rock samples from the National Geochemical Database: U.S. Geological Survey, Reston, VA.	U.S. Geological Survey	USGS		64.8625	-165.214	0.01				AAS	METAMORPHIC	UNKNOWN	UNKNOWN	MARBLE
BDN004		USGS		Geochemistry of rock samples from the National Geochemical Database: U.S. Geological Survey, Reston, VA.	U.S. Geological Survey	USGS		64.8625	-165.214	0.01				ES	METAMORPHIC	UNKNOWN	UNKNOWN	MARBLE																						5	700	30	5	20
BDN005		USGS		Geochemistry of rock samples from the National Geochemical Database: U.S. Geological Survey, Reston, VA.	U.S. Geological Survey	USGS		64.7528	-165.081	0.01				AAS	METAMORPHIC	UNKNOWN	UNKNOWN	MARBLE
BDN005		USGS		Geochemistry of rock samples from the National Geochemical Database: U.S. Geological Survey, Reston, VA.	U.S. Geological Survey	USGS		64.7528	-165.081	0.01				ES	METAMORPHIC	UNKNOWN	UNKNOWN	MARBLE																						0.5	150			50
BDN006		USGS		Geochemistry of rock samples from the National Geochemical Database: U.S. Geological Survey, Reston, VA.	U.S. Geological Survey	USGS		64.7944	-164.914	0.01				AAS	METAMORPHIC	UNKNOWN	UNKNOWN	MARBLE
BDN006		USGS		Geochemistry of rock samples from the National Geochemical Database: U.S. Geological Survey, Reston, VA.	U.S. Geological Survey	USGS		64.7944	-164.914	0.01				COL	METAMORPHIC	UNKNOWN	UNKNOWN	MARBLE																													10
BDN006		USGS		Geochemistry of rock samples from the National Geochemical Database: U.S. Geological Survey, Reston, VA.	U.S. Geological Survey	USGS		64.7944	-164.914	0.01				ES	METAMORPHIC	UNKNOWN	UNKNOWN	MARBLE																						3	1000	7		10
BDN007		USGS		Geochemistry of rock samples from the National Geochemical Database: U.S. Geological Survey, Reston, VA.	U.S. Geological Survey	USGS		64.7972	-165.269	0.01				AAS	METAMORPHIC	UNKNOWN	UNKNOWN	MARBLE
BDN007		USGS		Geochemistry of rock samples from the National Geochemical Database: U.S. Geological Survey, Reston, VA.	U.S. Geological Survey	USGS		64.7972	-165.269	0.01				ES	METAMORPHIC	UNKNOWN	UNKNOWN	MARBLE																						7	2000	30	30	1000
BDN008		USGS		Geochemistry of rock samples from the National Geochemical Database: U.S. Geological Survey, Reston, VA.	U.S. Geological Survey	USGS		64.7569	-165.242	0.01				AAS	METAMORPHIC	UNKNOWN	UNKNOWN	MARBLE
BDN008		USGS		Geochemistry of rock samples from the National Geochemical Database: U.S. Geological Survey, Reston, VA.	U.S. Geological Survey	USGS		64.7569	-165.242	0.01				ES	METAMORPHIC	UNKNOWN	UNKNOWN	MARBLE																						5	700	20	7	30
BDN009		USGS		Geochemistry of rock samples from the National Geochemical Database: U.S. Geological Survey, Reston, VA.	U.S. Geological Survey	USGS		64.7833	-165.289	0.01				AAS	METAMORPHIC	UNKNOWN	UNKNOWN	MARBLE
BDN009		USGS		Geochemistry of rock samples from the National Geochemical Database: U.S. Geological Survey, Reston, VA.	U.S. Geological Survey	USGS		64.7833	-165.289	0.01				ES	METAMORPHIC	UNKNOWN	UNKNOWN	MARBLE																						2	500			20
BDN010		USGS		Geochemistry of rock samples from the National Geochemical Database: U.S. Geological Survey, Reston, VA.	U.S. Geological Survey	USGS		64.7319	-165.342	0.01				AAS	METAMORPHIC	UNKNOWN	UNKNOWN	MARBLE
BDN010		USGS		Geochemistry of rock samples from the National Geochemical Database: U.S. Geological Survey, Reston, VA.	U.S. Geological Survey	USGS		64.7319	-165.342	0.01				ES	METAMORPHIC	UNKNOWN	UNKNOWN	MARBLE																						0.7	200			15
BDN011		USGS		Geochemistry of rock samples from the National Geochemical Database: U.S. Geological Survey, Reston, VA.	U.S. Geological Survey	USGS		64.7569	-165.389	0.01				AAS	METAMORPHIC	UNKNOWN	UNKNOWN	MARBLE
BDN011		USGS		Geochemistry of rock samples from the National Geochemical Database: U.S. Geological Survey, Reston, VA.	U.S. Geological Survey	USGS		64.7569	-165.389	0.01				ES	METAMORPHIC	UNKNOWN	UNKNOWN	MARBLE																						5	5000	100	30	30
BDN012		USGS		Geochemistry of rock samples from the National Geochemical Database: U.S. Geological Survey, Reston, VA.	U.S. Geological Survey	USGS		64.8028	-165.4	0.01				AAS	METAMORPHIC	UNKNOWN	UNKNOWN	MARBLE
BDN012		USGS		Geochemistry of rock samples from the National Geochemical Database: U.S. Geological Survey, Reston, VA.	U.S. Geological Survey	USGS		64.8028	-165.4	0.01				ES	METAMORPHIC	UNKNOWN	UNKNOWN	MARBLE																						0.3	150			15
BDN013		USGS		Geochemistry of rock samples from the National Geochemical Database: U.S. Geological Survey, Reston, VA.	U.S. Geological Survey	USGS		64.6708	-165.233	0.01				AAS	METAMORPHIC	UNKNOWN	UNKNOWN	MARBLE
BDN013		USGS		Geochemistry of rock samples from the National Geochemical Database: U.S. Geological Survey, Reston, VA.	U.S. Geological Survey	USGS		64.6708	-165.233	0.01				ES	METAMORPHIC	UNKNOWN	UNKNOWN	MARBLE																						5	1500	20	10	15
BDN014		USGS		Geochemistry of rock samples from the National Geochemical Database: U.S. Geological Survey, Reston, VA.	U.S. Geological Survey	USGS		64.7069	-165.257	0.01				AAS	METAMORPHIC	UNKNOWN	UNKNOWN	MARBLE
BDN014		USGS		Geochemistry of rock samples from the National Geochemical Database: U.S. Geological Survey, Reston, VA.	U.S. Geological Survey	USGS		64.7069	-165.257	0.01				ES	METAMORPHIC	UNKNOWN	UNKNOWN	MARBLE																						0.3	70			50
BDN015		USGS		Geochemistry of rock samples from the National Geochemical Database: U.S. Geological Survey, Reston, VA.	U.S. Geological Survey	USGS		64.6556	-165.203	0.01				AAS	METAMORPHIC	UNKNOWN	UNKNOWN	MARBLE
BDN015		USGS		Geochemistry of rock samples from the National Geochemical Database: U.S. Geological Survey, Reston, VA.	U.S. Geological Survey	USGS		64.6556	-165.203	0.01				ES	METAMORPHIC	UNKNOWN	UNKNOWN	MARBLE																						0.5	30			15
BDN016		USGS		Geochemistry of rock samples from the National Geochemical Database: U.S. Geological Survey, Reston, VA.	U.S. Geological Survey	USGS		64.6278	-165.106	0.01				AAS	METAMORPHIC	UNKNOWN	UNKNOWN	MARBLE
BDN016		USGS		Geochemistry of rock samples from the National Geochemical Database: U.S. Geological Survey, Reston, VA.	U.S. Geological Survey	USGS		64.6278	-165.106	0.01				COL	METAMORPHIC	UNKNOWN	UNKNOWN	MARBLE																													10
BDN019		USGS		Geochemistry of rock samples from the National Geochemical Database: U.S. Geological Survey, Reston, VA.	U.S. Geological Survey	USGS		64.825	-165.367	0.01				ES	METAMORPHIC	UNKNOWN	UNKNOWN	MARBLE																						0.7	200			30
BDN016		USGS		Geochemistry of rock samples from the National Geochemical Database: U.S. Geological Survey, Reston, VA.	U.S. Geological Survey	USGS		64.6278	-165.106	0.01				ES	METAMORPHIC	UNKNOWN	UNKNOWN	MARBLE																						15	1500	70	30	150
BDN017		USGS		Geochemistry of rock samples from the National Geochemical Database: U.S. Geological Survey, Reston, VA.	U.S. Geological Survey	USGS		64.6292	-165.196	0.01				AAS	METAMORPHIC	UNKNOWN	UNKNOWN	MARBLE
BDN017		USGS		Geochemistry of rock samples from the National Geochemical Database: U.S. Geological Survey, Reston, VA.	U.S. Geological Survey	USGS		64.6292	-165.196	0.01				ES	METAMORPHIC	UNKNOWN	UNKNOWN	MARBLE																						2	300			70
BDN018		USGS		Geochemistry of rock samples from the National Geochemical Database: U.S. Geological Survey, Reston, VA.	U.S. Geological Survey	USGS		64.6805	-165.229	0.01				AAS	METAMORPHIC	UNKNOWN	UNKNOWN	MARBLE
BDN018		USGS		Geochemistry of rock samples from the National Geochemical Database: U.S. Geological Survey, Reston, VA.	U.S. Geological Survey	USGS		64.6805	-165.229	0.01				ES	METAMORPHIC	UNKNOWN	UNKNOWN	MARBLE																						0.7	200			30
BDN019		USGS		Geochemistry of rock samples from the National Geochemical Database: U.S. Geological Survey, Reston, VA.	U.S. Geological Survey	USGS		64.825	-165.367	0.01				AAS	METAMORPHIC	UNKNOWN	UNKNOWN	MARBLE
BDN020		USGS		Geochemistry of rock samples from the National Geochemical Database: U.S. Geological Survey, Reston, VA.	U.S. Geological Survey	USGS		64.8458	-165.042	0.01				AAS	METAMORPHIC	UNKNOWN	UNKNOWN	MARBLE
BDN020		USGS		Geochemistry of rock samples from the National Geochemical Database: U.S. Geological Survey, Reston, VA.	U.S. Geological Survey	USGS		64.8458	-165.042	0.01				ES	METAMORPHIC	UNKNOWN	UNKNOWN	MARBLE																						5	2000	30	15	20				3
BDN021		USGS		Geochemistry of rock samples from the National Geochemical Database: U.S. Geological Survey, Reston, VA.	U.S. Geological Survey	USGS		64.8458	-165.042	0.01				AAS	METAMORPHIC	UNKNOWN	UNKNOWN	MARBLE
BDN021		USGS		Geochemistry of rock samples from the National Geochemical Database: U.S. Geological Survey, Reston, VA.	U.S. Geological Survey	USGS		64.8458	-165.042	0.01				ES	METAMORPHIC	UNKNOWN	UNKNOWN	MARBLE																						1.5	700			15
BDN022		USGS		Geochemistry of rock samples from the National Geochemical Database: U.S. Geological Survey, Reston, VA.	U.S. Geological Survey	USGS		64.7625	-165.214	0.01				AAS	METAMORPHIC	UNKNOWN	UNKNOWN	MARBLE
BDN022		USGS		Geochemistry of rock samples from the National Geochemical Database: U.S. Geological Survey, Reston, VA.	U.S. Geological Survey	USGS		64.7625	-165.214	0.01				ES	METAMORPHIC	UNKNOWN	UNKNOWN	MARBLE																						1	150	7		10
BDN023		USGS		Geochemistry of rock samples from the National Geochemical Database: U.S. Geological Survey, Reston, VA.	U.S. Geological Survey	USGS		64.7833	-165.15	0.01				AAS	METAMORPHIC	UNKNOWN	UNKNOWN	MARBLE
BDN023		USGS		Geochemistry of rock samples from the National Geochemical Database: U.S. Geological Survey, Reston, VA.	U.S. Geological Survey	USGS		64.7833	-165.15	0.01				ES	METAMORPHIC	UNKNOWN	UNKNOWN	MARBLE																						0.5	100			7
BDN024		USGS		Geochemistry of rock samples from the National Geochemical Database: U.S. Geological Survey, Reston, VA.	U.S. Geological Survey	USGS		64.7833	-165.139	0.01				AAS	METAMORPHIC	UNKNOWN	UNKNOWN	MARBLE
BDN024		USGS		Geochemistry of rock samples from the National Geochemical Database: U.S. Geological Survey, Reston, VA.	U.S. Geological Survey	USGS		64.7833	-165.139	0.01				ES	METAMORPHIC	UNKNOWN	UNKNOWN	MARBLE																						0.5	150			15
BDN025		USGS		Geochemistry of rock samples from the National Geochemical Database: U.S. Geological Survey, Reston, VA.	U.S. Geological Survey	USGS		64.7778	-165.086	0.01				AAS	METAMORPHIC	UNKNOWN	UNKNOWN	MARBLE
BDN025		USGS		Geochemistry of rock samples from the National Geochemical Database: U.S. Geological Survey, Reston, VA.	U.S. Geological Survey	USGS		64.7778	-165.086	0.01				COL	METAMORPHIC	UNKNOWN	UNKNOWN	MARBLE																													10
BDN025		USGS		Geochemistry of rock samples from the National Geochemical Database: U.S. Geological Survey, Reston, VA.	U.S. Geological Survey	USGS		64.7778	-165.086	0.01				ES	METAMORPHIC	UNKNOWN	UNKNOWN	MARBLE																						15	1500	150	70	70
BDN026		USGS		Geochemistry of rock samples from the National Geochemical Database: U.S. Geological Survey, Reston, VA.	U.S. Geological Survey	USGS		64.8055	-165.167	0.01				AAS	METAMORPHIC	UNKNOWN	UNKNOWN	MARBLE
BDN026		USGS		Geochemistry of rock samples from the National Geochemical Database: U.S. Geological Survey, Reston, VA.	U.S. Geological Survey	USGS		64.8055	-165.167	0.01				ES	METAMORPHIC	UNKNOWN	UNKNOWN	MARBLE																						5	1000	70	20	30
BDN027		USGS		Geochemistry of rock samples from the National Geochemical Database: U.S. Geological Survey, Reston, VA.	U.S. Geological Survey	USGS		64.8083	-165.186	0.01				AAS	METAMORPHIC	UNKNOWN	UNKNOWN	MARBLE
BDN027		USGS		Geochemistry of rock samples from the National Geochemical Database: U.S. Geological Survey, Reston, VA.	U.S. Geological Survey	USGS		64.8083	-165.186	0.01				ES	METAMORPHIC	UNKNOWN	UNKNOWN	MARBLE																						10	2000	30	30	150		300
BDN028		USGS		Geochemistry of rock samples from the National Geochemical Database: U.S. Geological Survey, Reston, VA.	U.S. Geological Survey	USGS		64.7278	-165.147	0.01				AAS	METAMORPHIC	UNKNOWN	UNKNOWN	MARBLE
BDN028		USGS		Geochemistry of rock samples from the National Geochemical Database: U.S. Geological Survey, Reston, VA.	U.S. Geological Survey	USGS		64.7278	-165.147	0.01				ES	METAMORPHIC	UNKNOWN	UNKNOWN	MARBLE																						0.07	150			5
BDN029		USGS		Geochemistry of rock samples from the National Geochemical Database: U.S. Geological Survey, Reston, VA.	U.S. Geological Survey	USGS		64.8431	-165.233	0.01				AAS	METAMORPHIC	UNKNOWN	UNKNOWN	MARBLE
BDN029		USGS		Geochemistry of rock samples from the National Geochemical Database: U.S. Geological Survey, Reston, VA.	U.S. Geological Survey	USGS		64.8431	-165.233	0.01				ES	METAMORPHIC	UNKNOWN	UNKNOWN	MARBLE																						0.15	300			5
BDN030		USGS		Geochemistry of rock samples from the National Geochemical Database: U.S. Geological Survey, Reston, VA.	U.S. Geological Survey	USGS		64.8431	-165.228	0.01				AAS	METAMORPHIC	UNKNOWN	UNKNOWN	MARBLE
BDN030		USGS		Geochemistry of rock samples from the National Geochemical Database: U.S. Geological Survey, Reston, VA.	U.S. Geological Survey	USGS		64.8431	-165.228	0.01				ES	METAMORPHIC	UNKNOWN	UNKNOWN	MARBLE																						0.1	100			5
BDN031		USGS		Geochemistry of rock samples from the National Geochemical Database: U.S. Geological Survey, Reston, VA.	U.S. Geological Survey	USGS		64.8403	-165.228	0.01				AAS	METAMORPHIC	UNKNOWN	UNKNOWN	MARBLE
BDN031		USGS		Geochemistry of rock samples from the National Geochemical Database: U.S. Geological Survey, Reston, VA.	U.S. Geological Survey	USGS		64.8403	-165.228	0.01				ES	METAMORPHIC	UNKNOWN	UNKNOWN	MARBLE																						1	200			5
BDN032		USGS		Geochemistry of rock samples from the National Geochemical Database: U.S. Geological Survey, Reston, VA.	U.S. Geological Survey	USGS		64.8569	-165.217	0.01				AAS	METAMORPHIC	UNKNOWN	UNKNOWN	MARBLE
BDN032		USGS		Geochemistry of rock samples from the National Geochemical Database: U.S. Geological Survey, Reston, VA.	U.S. Geological Survey	USGS		64.8569	-165.217	0.01				ES	METAMORPHIC	UNKNOWN	UNKNOWN	MARBLE																						0.5	70			7
BDN033		USGS		Geochemistry of rock samples from the National Geochemical Database: U.S. Geological Survey, Reston, VA.	U.S. Geological Survey	USGS		64.8472	-165.239	0.01				AAS	METAMORPHIC	UNKNOWN	UNKNOWN	MARBLE
BDN033		USGS		Geochemistry of rock samples from the National Geochemical Database: U.S. Geological Survey, Reston, VA.	U.S. Geological Survey	USGS		64.8472	-165.239	0.01				ES	METAMORPHIC	UNKNOWN	UNKNOWN	MARBLE																						5	1500	30	10	30
BDN034		USGS		Geochemistry of rock samples from the National Geochemical Database: U.S. Geological Survey, Reston, VA.	U.S. Geological Survey	USGS		64.7861	-165.161	0.01				AAS	METAMORPHIC	UNKNOWN	UNKNOWN	MARBLE
BDN034		USGS		Geochemistry of rock samples from the National Geochemical Database: U.S. Geological Survey, Reston, VA.	U.S. Geological Survey	USGS		64.7861	-165.161	0.01				ES	METAMORPHIC	UNKNOWN	UNKNOWN	MARBLE																						0.07	200			7
BDN035		USGS		Geochemistry of rock samples from the National Geochemical Database: U.S. Geological Survey, Reston, VA.	U.S. Geological Survey	USGS		64.8403	-165.217	0.01				AAS	METAMORPHIC	UNKNOWN	UNKNOWN	MARBLE
BDN035		USGS		Geochemistry of rock samples from the National Geochemical Database: U.S. Geological Survey, Reston, VA.	U.S. Geological Survey	USGS		64.8403	-165.217	0.01				ES	METAMORPHIC	UNKNOWN	UNKNOWN	MARBLE																						0.5	300			10
BDN036		USGS		Geochemistry of rock samples from the National Geochemical Database: U.S. Geological Survey, Reston, VA.	U.S. Geological Survey	USGS		64.8431	-165.165	0.01				AAS	METAMORPHIC	UNKNOWN	UNKNOWN	MARBLE
BDN036		USGS		Geochemistry of rock samples from the National Geochemical Database: U.S. Geological Survey, Reston, VA.	U.S. Geological Survey	USGS		64.8431	-165.165	0.01				ES	METAMORPHIC	UNKNOWN	UNKNOWN	MARBLE																						3	500	15	10	70
BDN037		USGS		Geochemistry of rock samples from the National Geochemical Database: U.S. Geological Survey, Reston, VA.	U.S. Geological Survey	USGS		64.8347	-165.225	0.01				AAS	METAMORPHIC	UNKNOWN	UNKNOWN	MARBLE
BDN037		USGS		Geochemistry of rock samples from the National Geochemical Database: U.S. Geological Survey, Reston, VA.	U.S. Geological Survey	USGS		64.8347	-165.225	0.01				ES	METAMORPHIC	UNKNOWN	UNKNOWN	MARBLE																						3	300	7		15
BDN039		USGS		Geochemistry of rock samples from the National Geochemical Database: U.S. Geological Survey, Reston, VA.	U.S. Geological Survey	USGS		64.8542	-165.119	0.01				AAS	METAMORPHIC	UNKNOWN	UNKNOWN	MARBLE
BDN039		USGS		Geochemistry of rock samples from the National Geochemical Database: U.S. Geological Survey, Reston, VA.	U.S. Geological Survey	USGS		64.8542	-165.119	0.01				ES	METAMORPHIC	UNKNOWN	UNKNOWN	MARBLE																						2	500	10	5	7
BDN040		USGS		Geochemistry of rock samples from the National Geochemical Database: U.S. Geological Survey, Reston, VA.	U.S. Geological Survey	USGS		64.8542	-165.119	0.01				AAS	METAMORPHIC	UNKNOWN	UNKNOWN	MARBLE
BDN040		USGS		Geochemistry of rock samples from the National Geochemical Database: U.S. Geological Survey, Reston, VA.	U.S. Geological Survey	USGS		64.8542	-165.119	0.01				ES	METAMORPHIC	UNKNOWN	UNKNOWN	MARBLE																						3	700	30	15	20
BDN041		USGS		Geochemistry of rock samples from the National Geochemical Database: U.S. Geological Survey, Reston, VA.	U.S. Geological Survey	USGS		64.8472	-165.081	0.01				AAS	METAMORPHIC	UNKNOWN	UNKNOWN	MARBLE
BDN041		USGS		Geochemistry of rock samples from the National Geochemical Database: U.S. Geological Survey, Reston, VA.	U.S. Geological Survey	USGS		64.8472	-165.081	0.01				ES	METAMORPHIC	UNKNOWN	UNKNOWN	MARBLE																						3	1000	30	15	10
BDN042		USGS		Geochemistry of rock samples from the National Geochemical Database: U.S. Geological Survey, Reston, VA.	U.S. Geological Survey	USGS		64.7514	-165.11	0.01				AAS	METAMORPHIC	UNKNOWN	UNKNOWN	MARBLE
BDN042		USGS		Geochemistry of rock samples from the National Geochemical Database: U.S. Geological Survey, Reston, VA.	U.S. Geological Survey	USGS		64.7514	-165.11	0.01				ES	METAMORPHIC	UNKNOWN	UNKNOWN	MARBLE																						1.5	200	10		15
BDN043		USGS		Geochemistry of rock samples from the National Geochemical Database: U.S. Geological Survey, Reston, VA.	U.S. Geological Survey	USGS		64.7486	-165.083	0.01				AAS	METAMORPHIC	UNKNOWN	UNKNOWN	MARBLE
BDN043		USGS		Geochemistry of rock samples from the National Geochemical Database: U.S. Geological Survey, Reston, VA.	U.S. Geological Survey	USGS		64.7486	-165.083	0.01				ES	METAMORPHIC	UNKNOWN	UNKNOWN	MARBLE																						0.1	70			50
BDN044		USGS		Geochemistry of rock samples from the National Geochemical Database: U.S. Geological Survey, Reston, VA.	U.S. Geological Survey	USGS		64.7375	-165.072	0.01				AAS	METAMORPHIC	UNKNOWN	UNKNOWN	MARBLE
BDN044		USGS		Geochemistry of rock samples from the National Geochemical Database: U.S. Geological Survey, Reston, VA.	U.S. Geological Survey	USGS		64.7375	-165.072	0.01				ES	METAMORPHIC	UNKNOWN	UNKNOWN	MARBLE																						0.7	150			7
BDN045		USGS		Geochemistry of rock samples from the National Geochemical Database: U.S. Geological Survey, Reston, VA.	U.S. Geological Survey	USGS		64.7361	-165.075	0.01				AAS	METAMORPHIC	UNKNOWN	UNKNOWN	MARBLE
BDN045		USGS		Geochemistry of rock samples from the National Geochemical Database: U.S. Geological Survey, Reston, VA.	U.S. Geological Survey	USGS		64.7361	-165.075	0.01				ES	METAMORPHIC	UNKNOWN	UNKNOWN	MARBLE																						5	2000	15	7	30
BDN046		USGS		Geochemistry of rock samples from the National Geochemical Database: U.S. Geological Survey, Reston, VA.	U.S. Geological Survey	USGS		64.8028	-165.126	0.01				AAS	METAMORPHIC	UNKNOWN	UNKNOWN	MARBLE
BDN046		USGS		Geochemistry of rock samples from the National Geochemical Database: U.S. Geological Survey, Reston, VA.	U.S. Geological Survey	USGS		64.8028	-165.126	0.01				ES	METAMORPHIC	UNKNOWN	UNKNOWN	MARBLE																						2	1000	30	10	15
BDN047		USGS		Geochemistry of rock samples from the National Geochemical Database: U.S. Geological Survey, Reston, VA.	U.S. Geological Survey	USGS		64.7861	-165.192	0.01				AAS	METAMORPHIC	UNKNOWN	UNKNOWN	MARBLE
BDN047		USGS		Geochemistry of rock samples from the National Geochemical Database: U.S. Geological Survey, Reston, VA.	U.S. Geological Survey	USGS		64.7861	-165.192	0.01				ES	METAMORPHIC	UNKNOWN	UNKNOWN	MARBLE																						7	1500	100	30	30
BDN048		USGS		Geochemistry of rock samples from the National Geochemical Database: U.S. Geological Survey, Reston, VA.	U.S. Geological Survey	USGS		64.8236	-165.262	0.01				AAS	METAMORPHIC	UNKNOWN	UNKNOWN	MARBLE
BDN048		USGS		Geochemistry of rock samples from the National Geochemical Database: U.S. Geological Survey, Reston, VA.	U.S. Geological Survey	USGS		64.8236	-165.262	0.01				ES	METAMORPHIC	UNKNOWN	UNKNOWN	MARBLE																						3	2000	7		10
BDN049		USGS		Geochemistry of rock samples from the National Geochemical Database: U.S. Geological Survey, Reston, VA.	U.S. Geological Survey	USGS		64.818	-165.268	0.01				AAS	METAMORPHIC	UNKNOWN	UNKNOWN	MARBLE
BDN049		USGS		Geochemistry of rock samples from the National Geochemical Database: U.S. Geological Survey, Reston, VA.	U.S. Geological Survey	USGS		64.818	-165.268	0.01				ES	METAMORPHIC	UNKNOWN	UNKNOWN	MARBLE																						5	700	70	30	15
BDN050		USGS		Geochemistry of rock samples from the National Geochemical Database: U.S. Geological Survey, Reston, VA.	U.S. Geological Survey	USGS		64.8139	-165.279	0.01				AAS	METAMORPHIC	UNKNOWN	UNKNOWN	MARBLE
BDN050		USGS		Geochemistry of rock samples from the National Geochemical Database: U.S. Geological Survey, Reston, VA.	U.S. Geological Survey	USGS		64.8139	-165.279	0.01				ES	METAMORPHIC	UNKNOWN	UNKNOWN	MARBLE																						1.5	200			7
BDN051		USGS		Geochemistry of rock samples from the National Geochemical Database: U.S. Geological Survey, Reston, VA.	U.S. Geological Survey	USGS		64.8139	-165.283	0.01				AAS	METAMORPHIC	UNKNOWN	UNKNOWN	MARBLE
BDN051		USGS		Geochemistry of rock samples from the National Geochemical Database: U.S. Geological Survey, Reston, VA.	U.S. Geological Survey	USGS		64.8139	-165.283	0.01				ES	METAMORPHIC	UNKNOWN	UNKNOWN	MARBLE																							30			5
BDN052		USGS		Geochemistry of rock samples from the National Geochemical Database: U.S. Geological Survey, Reston, VA.	U.S. Geological Survey	USGS		64.8167	-165.25	0.01				AAS	METAMORPHIC	UNKNOWN	UNKNOWN	MARBLE
BDN052		USGS		Geochemistry of rock samples from the National Geochemical Database: U.S. Geological Survey, Reston, VA.	U.S. Geological Survey	USGS		64.8167	-165.25	0.01				ES	METAMORPHIC	UNKNOWN	UNKNOWN	MARBLE																						0.7	300			7
BDN053		USGS		Geochemistry of rock samples from the National Geochemical Database: U.S. Geological Survey, Reston, VA.	U.S. Geological Survey	USGS		64.8055	-165.26	0.01				AAS	METAMORPHIC	UNKNOWN	UNKNOWN	MARBLE
BDN053		USGS		Geochemistry of rock samples from the National Geochemical Database: U.S. Geological Survey, Reston, VA.	U.S. Geological Survey	USGS		64.8055	-165.26	0.01				ES	METAMORPHIC	UNKNOWN	UNKNOWN	MARBLE																						1	200			7
BDN054		USGS		Geochemistry of rock samples from the National Geochemical Database: U.S. Geological Survey, Reston, VA.	U.S. Geological Survey	USGS		64.7986	-165.261	0.01				AAS	METAMORPHIC	UNKNOWN	UNKNOWN	MARBLE
BDN054		USGS		Geochemistry of rock samples from the National Geochemical Database: U.S. Geological Survey, Reston, VA.	U.S. Geological Survey	USGS		64.7986	-165.261	0.01				ES	METAMORPHIC	UNKNOWN	UNKNOWN	MARBLE																						2	500	30	15	30
BDN055		USGS		Geochemistry of rock samples from the National Geochemical Database: U.S. Geological Survey, Reston, VA.	U.S. Geological Survey	USGS		64.7972	-165.271	0.01				AAS	METAMORPHIC	UNKNOWN	UNKNOWN	MARBLE
BDN055		USGS		Geochemistry of rock samples from the National Geochemical Database: U.S. Geological Survey, Reston, VA.	U.S. Geological Survey	USGS		64.7972	-165.271	0.01				ES	METAMORPHIC	UNKNOWN	UNKNOWN	MARBLE																						0.7	300			10
BDN056		USGS		Geochemistry of rock samples from the National Geochemical Database: U.S. Geological Survey, Reston, VA.	U.S. Geological Survey	USGS		64.7722	-165.257	0.01				AAS	METAMORPHIC	UNKNOWN	UNKNOWN	MARBLE
BDN056		USGS		Geochemistry of rock samples from the National Geochemical Database: U.S. Geological Survey, Reston, VA.	U.S. Geological Survey	USGS		64.7722	-165.257	0.01				ES	METAMORPHIC	UNKNOWN	UNKNOWN	MARBLE																						5	1500	5	10	7		1000		5
BDN057		USGS		Geochemistry of rock samples from the National Geochemical Database: U.S. Geological Survey, Reston, VA.	U.S. Geological Survey	USGS		64.7653	-165.253	0.01				AAS	METAMORPHIC	UNKNOWN	UNKNOWN	MARBLE
BDN057		USGS		Geochemistry of rock samples from the National Geochemical Database: U.S. Geological Survey, Reston, VA.	U.S. Geological Survey	USGS		64.7653	-165.253	0.01				ES	METAMORPHIC	UNKNOWN	UNKNOWN	MARBLE																						10	1500	100	30	30		300
BDN058		USGS		Geochemistry of rock samples from the National Geochemical Database: U.S. Geological Survey, Reston, VA.	U.S. Geological Survey	USGS		64.7514	-165.258	0.01				AAS	METAMORPHIC	UNKNOWN	UNKNOWN	MARBLE
BDN058		USGS		Geochemistry of rock samples from the National Geochemical Database: U.S. Geological Survey, Reston, VA.	U.S. Geological Survey	USGS		64.7514	-165.258	0.01				ES	METAMORPHIC	UNKNOWN	UNKNOWN	MARBLE																						3	500			20
BDN059		USGS		Geochemistry of rock samples from the National Geochemical Database: U.S. Geological Survey, Reston, VA.	U.S. Geological Survey	USGS		64.7569	-165.253	0.01				AAS	METAMORPHIC	UNKNOWN	UNKNOWN	MARBLE
BDN059		USGS		Geochemistry of rock samples from the National Geochemical Database: U.S. Geological Survey, Reston, VA.	U.S. Geological Survey	USGS		64.7569	-165.253	0.01				ES	METAMORPHIC	UNKNOWN	UNKNOWN	MARBLE																						3	700	30	15	30
BDN060		USGS		Geochemistry of rock samples from the National Geochemical Database: U.S. Geological Survey, Reston, VA.	U.S. Geological Survey	USGS		64.7611	-165.261	0.01				AAS	METAMORPHIC	UNKNOWN	UNKNOWN	MARBLE
BDN060		USGS		Geochemistry of rock samples from the National Geochemical Database: U.S. Geological Survey, Reston, VA.	U.S. Geological Survey	USGS		64.7611	-165.261	0.01				ES	METAMORPHIC	UNKNOWN	UNKNOWN	MARBLE																						3	1500	7		30
BDN061		USGS		Geochemistry of rock samples from the National Geochemical Database: U.S. Geological Survey, Reston, VA.	U.S. Geological Survey	USGS		64.7736	-165.262	0.01				AAS	METAMORPHIC	UNKNOWN	UNKNOWN	MARBLE
BDN061		USGS		Geochemistry of rock samples from the National Geochemical Database: U.S. Geological Survey, Reston, VA.	U.S. Geological Survey	USGS		64.7736	-165.262	0.01				ES	METAMORPHIC	UNKNOWN	UNKNOWN	MARBLE																						3	1000	20	5	20
BDN062		USGS		Geochemistry of rock samples from the National Geochemical Database: U.S. Geological Survey, Reston, VA.	U.S. Geological Survey	USGS		64.7569	-165.296	0.01				AAS	METAMORPHIC	UNKNOWN	UNKNOWN	MARBLE
BDN062		USGS		Geochemistry of rock samples from the National Geochemical Database: U.S. Geological Survey, Reston, VA.	U.S. Geological Survey	USGS		64.7569	-165.296	0.01				ES	METAMORPHIC	UNKNOWN	UNKNOWN	MARBLE																						1	1500			30
BDN063		USGS		Geochemistry of rock samples from the National Geochemical Database: U.S. Geological Survey, Reston, VA.	U.S. Geological Survey	USGS		64.7639	-165.292	0.01				AAS	METAMORPHIC	UNKNOWN	UNKNOWN	MARBLE
BDN063		USGS		Geochemistry of rock samples from the National Geochemical Database: U.S. Geological Survey, Reston, VA.	U.S. Geological Survey	USGS		64.7639	-165.292	0.01				ES	METAMORPHIC	UNKNOWN	UNKNOWN	MARBLE																						3	3000			15
BDN064		USGS		Geochemistry of rock samples from the National Geochemical Database: U.S. Geological Survey, Reston, VA.	U.S. Geological Survey	USGS		64.7833	-165.292	0.01				AAS	METAMORPHIC	UNKNOWN	UNKNOWN	MARBLE
BDN064		USGS		Geochemistry of rock samples from the National Geochemical Database: U.S. Geological Survey, Reston, VA.	U.S. Geological Survey	USGS		64.7833	-165.292	0.01				COL	METAMORPHIC	UNKNOWN	UNKNOWN	MARBLE																													10
BDN064		USGS		Geochemistry of rock samples from the National Geochemical Database: U.S. Geological Survey, Reston, VA.	U.S. Geological Survey	USGS		64.7833	-165.292	0.01				ES	METAMORPHIC	UNKNOWN	UNKNOWN	MARBLE																						3	700	70	15	20
BDN065		USGS		Geochemistry of rock samples from the National Geochemical Database: U.S. Geological Survey, Reston, VA.	U.S. Geological Survey	USGS		64.7833	-165.292	0.01				AAS	METAMORPHIC	UNKNOWN	UNKNOWN	MARBLE
BDN065		USGS		Geochemistry of rock samples from the National Geochemical Database: U.S. Geological Survey, Reston, VA.	U.S. Geological Survey	USGS		64.7833	-165.292	0.01				ES	METAMORPHIC	UNKNOWN	UNKNOWN	MARBLE																						0.7	150	7		20
BDN066		USGS		Geochemistry of rock samples from the National Geochemical Database: U.S. Geological Survey, Reston, VA.	U.S. Geological Survey	USGS		64.7708	-165.294	0.01				AAS	METAMORPHIC	UNKNOWN	UNKNOWN	MARBLE
BDN066		USGS		Geochemistry of rock samples from the National Geochemical Database: U.S. Geological Survey, Reston, VA.	U.S. Geological Survey	USGS		64.7708	-165.294	0.01				ES	METAMORPHIC	UNKNOWN	UNKNOWN	MARBLE																						7	1000	7		20
BDN067		USGS		Geochemistry of rock samples from the National Geochemical Database: U.S. Geological Survey, Reston, VA.	U.S. Geological Survey	USGS		64.7708	-165.303	0.01				AAS	METAMORPHIC	UNKNOWN	UNKNOWN	MARBLE
BDN067		USGS		Geochemistry of rock samples from the National Geochemical Database: U.S. Geological Survey, Reston, VA.	U.S. Geological Survey	USGS		64.7708	-165.303	0.01				ES	METAMORPHIC	UNKNOWN	UNKNOWN	MARBLE																						1.5	1000			30
BDN068		USGS		Geochemistry of rock samples from the National Geochemical Database: U.S. Geological Survey, Reston, VA.	U.S. Geological Survey	USGS		64.7708	-165.303	0.01				AAS	METAMORPHIC	UNKNOWN	UNKNOWN	MARBLE
BDN068		USGS		Geochemistry of rock samples from the National Geochemical Database: U.S. Geological Survey, Reston, VA.	U.S. Geological Survey	USGS		64.7708	-165.303	0.01				ES	METAMORPHIC	UNKNOWN	UNKNOWN	MARBLE																						0.2	700	5		30
BDN069		USGS		Geochemistry of rock samples from the National Geochemical Database: U.S. Geological Survey, Reston, VA.	U.S. Geological Survey	USGS		64.743	-165.333	0.01				AAS	METAMORPHIC	UNKNOWN	UNKNOWN	MARBLE
BDN069		USGS		Geochemistry of rock samples from the National Geochemical Database: U.S. Geological Survey, Reston, VA.	U.S. Geological Survey	USGS		64.743	-165.333	0.01				ES	METAMORPHIC	UNKNOWN	UNKNOWN	MARBLE																						3	700			50
BDN070		USGS		Geochemistry of rock samples from the National Geochemical Database: U.S. Geological Survey, Reston, VA.	U.S. Geological Survey	USGS		64.7319	-165.342	0.01				AAS	METAMORPHIC	UNKNOWN	UNKNOWN	MARBLE
BDN070		USGS		Geochemistry of rock samples from the National Geochemical Database: U.S. Geological Survey, Reston, VA.	U.S. Geological Survey	USGS		64.7319	-165.342	0.01				ES	METAMORPHIC	UNKNOWN	UNKNOWN	MARBLE																						0.3	30			30
BDN071		USGS		Geochemistry of rock samples from the National Geochemical Database: U.S. Geological Survey, Reston, VA.	U.S. Geological Survey	USGS		64.7403	-165.34	0.01				AAS	METAMORPHIC	UNKNOWN	UNKNOWN	MARBLE
BDN071		USGS		Geochemistry of rock samples from the National Geochemical Database: U.S. Geological Survey, Reston, VA.	U.S. Geological Survey	USGS		64.7403	-165.34	0.01				ES	METAMORPHIC	UNKNOWN	UNKNOWN	MARBLE																						5	1500	70	15	50
BDN072		USGS		Geochemistry of rock samples from the National Geochemical Database: U.S. Geological Survey, Reston, VA.	U.S. Geological Survey	USGS		64.743	-165.372	0.01				AAS	METAMORPHIC	UNKNOWN	UNKNOWN	MARBLE
BDN072		USGS		Geochemistry of rock samples from the National Geochemical Database: U.S. Geological Survey, Reston, VA.	U.S. Geological Survey	USGS		64.743	-165.372	0.01				ES	METAMORPHIC	UNKNOWN	UNKNOWN	MARBLE																						3	1000			50
BDN073		USGS		Geochemistry of rock samples from the National Geochemical Database: U.S. Geological Survey, Reston, VA.	U.S. Geological Survey	USGS		64.7417	-165.372	0.01				AAS	METAMORPHIC	UNKNOWN	UNKNOWN	MARBLE
BDN073		USGS		Geochemistry of rock samples from the National Geochemical Database: U.S. Geological Survey, Reston, VA.	U.S. Geological Survey	USGS		64.7417	-165.372	0.01				ES	METAMORPHIC	UNKNOWN	UNKNOWN	MARBLE																						3	1000			50
BDN074		USGS		Geochemistry of rock samples from the National Geochemical Database: U.S. Geological Survey, Reston, VA.	U.S. Geological Survey	USGS		64.7722	-165.363	0.01				AAS	METAMORPHIC	UNKNOWN	UNKNOWN	MARBLE
BDN074		USGS		Geochemistry of rock samples from the National Geochemical Database: U.S. Geological Survey, Reston, VA.	U.S. Geological Survey	USGS		64.7722	-165.363	0.01				ES	METAMORPHIC	UNKNOWN	UNKNOWN	MARBLE																						2	700			50
BDN075		USGS		Geochemistry of rock samples from the National Geochemical Database: U.S. Geological Survey, Reston, VA.	U.S. Geological Survey	USGS		64.7917	-165.312	0.01				AAS	METAMORPHIC	UNKNOWN	UNKNOWN	MARBLE
BDN075		USGS		Geochemistry of rock samples from the National Geochemical Database: U.S. Geological Survey, Reston, VA.	U.S. Geological Survey	USGS		64.7917	-165.312	0.01				COL	METAMORPHIC	UNKNOWN	UNKNOWN	MARBLE																													10
BDN075		USGS		Geochemistry of rock samples from the National Geochemical Database: U.S. Geological Survey, Reston, VA.	U.S. Geological Survey	USGS		64.7917	-165.312	0.01				ES	METAMORPHIC	UNKNOWN	UNKNOWN	MARBLE																						3	1000			50
BDN076		USGS		Geochemistry of rock samples from the National Geochemical Database: U.S. Geological Survey, Reston, VA.	U.S. Geological Survey	USGS		64.7972	-165.308	0.01				AAS	METAMORPHIC	UNKNOWN	UNKNOWN	MARBLE
BDN076		USGS		Geochemistry of rock samples from the National Geochemical Database: U.S. Geological Survey, Reston, VA.	U.S. Geological Survey	USGS		64.7972	-165.308	0.01				COL	METAMORPHIC	UNKNOWN	UNKNOWN	MARBLE																													20
BDN076		USGS		Geochemistry of rock samples from the National Geochemical Database: U.S. Geological Survey, Reston, VA.	U.S. Geological Survey	USGS		64.7972	-165.308	0.01				ES	METAMORPHIC	UNKNOWN	UNKNOWN	MARBLE																						0.7	700	7		700
BDN077		USGS		Geochemistry of rock samples from the National Geochemical Database: U.S. Geological Survey, Reston, VA.	U.S. Geological Survey	USGS		64.7972	-165.308	0.01				AAS	METAMORPHIC	UNKNOWN	UNKNOWN	MARBLE
BDN077		USGS		Geochemistry of rock samples from the National Geochemical Database: U.S. Geological Survey, Reston, VA.	U.S. Geological Survey	USGS		64.7972	-165.308	0.01				ES	METAMORPHIC	UNKNOWN	UNKNOWN	MARBLE																						2	300			50
BDN078		USGS		Geochemistry of rock samples from the National Geochemical Database: U.S. Geological Survey, Reston, VA.	U.S. Geological Survey	USGS		64.7972	-165.296	0.01				AAS	METAMORPHIC	UNKNOWN	UNKNOWN	MARBLE
BDN081		USGS		Geochemistry of rock samples from the National Geochemical Database: U.S. Geological Survey, Reston, VA.	U.S. Geological Survey	USGS		64.8028	-165.4	0.01				ES	METAMORPHIC	UNKNOWN	UNKNOWN	MARBLE																						0.3	100			15
BDN078		USGS		Geochemistry of rock samples from the National Geochemical Database: U.S. Geological Survey, Reston, VA.	U.S. Geological Survey	USGS		64.7972	-165.296	0.01				ES	METAMORPHIC	UNKNOWN	UNKNOWN	MARBLE																						3	500	20	15	70
BDN079		USGS		Geochemistry of rock samples from the National Geochemical Database: U.S. Geological Survey, Reston, VA.	U.S. Geological Survey	USGS		64.8139	-165.278	0.01				AAS	METAMORPHIC	UNKNOWN	UNKNOWN	MARBLE
BDN079		USGS		Geochemistry of rock samples from the National Geochemical Database: U.S. Geological Survey, Reston, VA.	U.S. Geological Survey	USGS		64.8139	-165.278	0.01				ES	METAMORPHIC	UNKNOWN	UNKNOWN	MARBLE																							30			5
BDN080		USGS		Geochemistry of rock samples from the National Geochemical Database: U.S. Geological Survey, Reston, VA.	U.S. Geological Survey	USGS		64.8139	-165.299	0.01				AAS	METAMORPHIC	UNKNOWN	UNKNOWN	MARBLE
BDN080		USGS		Geochemistry of rock samples from the National Geochemical Database: U.S. Geological Survey, Reston, VA.	U.S. Geological Survey	USGS		64.8139	-165.299	0.01				COL	METAMORPHIC	UNKNOWN	UNKNOWN	MARBLE																													10
BDN080		USGS		Geochemistry of rock samples from the National Geochemical Database: U.S. Geological Survey, Reston, VA.	U.S. Geological Survey	USGS		64.8139	-165.299	0.01				ES	METAMORPHIC	UNKNOWN	UNKNOWN	MARBLE																						1	1000			20
BDN081		USGS		Geochemistry of rock samples from the National Geochemical Database: U.S. Geological Survey, Reston, VA.	U.S. Geological Survey	USGS		64.8028	-165.4	0.01				AAS	METAMORPHIC	UNKNOWN	UNKNOWN	MARBLE
BDN082		USGS		Geochemistry of rock samples from the National Geochemical Database: U.S. Geological Survey, Reston, VA.	U.S. Geological Survey	USGS		64.6708	-165.264	0.01				AAS	METAMORPHIC	UNKNOWN	UNKNOWN	MARBLE
BDN082		USGS		Geochemistry of rock samples from the National Geochemical Database: U.S. Geological Survey, Reston, VA.	U.S. Geological Survey	USGS		64.6708	-165.264	0.01				ES	METAMORPHIC	UNKNOWN	UNKNOWN	MARBLE																						0.07	200			15
BDN083		USGS		Geochemistry of rock samples from the National Geochemical Database: U.S. Geological Survey, Reston, VA.	U.S. Geological Survey	USGS		64.6778	-165.258	0.01				AAS	METAMORPHIC	UNKNOWN	UNKNOWN	MARBLE
BDN083		USGS		Geochemistry of rock samples from the National Geochemical Database: U.S. Geological Survey, Reston, VA.	U.S. Geological Survey	USGS		64.6778	-165.258	0.01				ES	METAMORPHIC	UNKNOWN	UNKNOWN	MARBLE																						0.3	20			30
BDN084		USGS		Geochemistry of rock samples from the National Geochemical Database: U.S. Geological Survey, Reston, VA.	U.S. Geological Survey	USGS		64.6778	-165.257	0.01				AAS	METAMORPHIC	UNKNOWN	UNKNOWN	MARBLE
BDN084		USGS		Geochemistry of rock samples from the National Geochemical Database: U.S. Geological Survey, Reston, VA.	U.S. Geological Survey	USGS		64.6778	-165.257	0.01				ES	METAMORPHIC	UNKNOWN	UNKNOWN	MARBLE																						5	700	15	7	30
BDN085		USGS		Geochemistry of rock samples from the National Geochemical Database: U.S. Geological Survey, Reston, VA.	U.S. Geological Survey	USGS		64.6903	-165.278	0.01				AAS	METAMORPHIC	UNKNOWN	UNKNOWN	MARBLE
BDN085		USGS		Geochemistry of rock samples from the National Geochemical Database: U.S. Geological Survey, Reston, VA.	U.S. Geological Survey	USGS		64.6903	-165.278	0.01				ES	METAMORPHIC	UNKNOWN	UNKNOWN	MARBLE																							30			10
BDN086		USGS		Geochemistry of rock samples from the National Geochemical Database: U.S. Geological Survey, Reston, VA.	U.S. Geological Survey	USGS		64.5167	-165.2	0.01				AAS	METAMORPHIC	UNKNOWN	UNKNOWN	MARBLE
BDN086		USGS		Geochemistry of rock samples from the National Geochemical Database: U.S. Geological Survey, Reston, VA.	U.S. Geological Survey	USGS		64.5167	-165.2	0.01				ES	METAMORPHIC	UNKNOWN	UNKNOWN	MARBLE																						0.05	70			7
BDN088		USGS		Geochemistry of rock samples from the National Geochemical Database: U.S. Geological Survey, Reston, VA.	U.S. Geological Survey	USGS		64.7139	-165.289	0.01				AAS	METAMORPHIC	UNKNOWN	UNKNOWN	MARBLE
BDN088		USGS		Geochemistry of rock samples from the National Geochemical Database: U.S. Geological Survey, Reston, VA.	U.S. Geological Survey	USGS		64.7139	-165.289	0.01				ES	METAMORPHIC	UNKNOWN	UNKNOWN	MARBLE																						2	300	7		15
BDN089		USGS		Geochemistry of rock samples from the National Geochemical Database: U.S. Geological Survey, Reston, VA.	U.S. Geological Survey	USGS		64.7153	-165.246	0.01				AAS	METAMORPHIC	UNKNOWN	UNKNOWN	MARBLE
BDN089		USGS		Geochemistry of rock samples from the National Geochemical Database: U.S. Geological Survey, Reston, VA.	U.S. Geological Survey	USGS		64.7153	-165.246	0.01				ES	METAMORPHIC	UNKNOWN	UNKNOWN	MARBLE																						0.3	70			15
BDN090		USGS		Geochemistry of rock samples from the National Geochemical Database: U.S. Geological Survey, Reston, VA.	U.S. Geological Survey	USGS		64.7347	-165.128	0.01				AAS	METAMORPHIC	UNKNOWN	UNKNOWN	MARBLE
BDN090		USGS		Geochemistry of rock samples from the National Geochemical Database: U.S. Geological Survey, Reston, VA.	U.S. Geological Survey	USGS		64.7347	-165.128	0.01				ES	METAMORPHIC	UNKNOWN	UNKNOWN	MARBLE																						0.3	150			15
BDN091		USGS		Geochemistry of rock samples from the National Geochemical Database: U.S. Geological Survey, Reston, VA.	U.S. Geological Survey	USGS		64.7292	-165.157	0.01				AAS	METAMORPHIC	UNKNOWN	UNKNOWN	MARBLE
BDN097		USGS		Geochemistry of rock samples from the National Geochemical Database: U.S. Geological Survey, Reston, VA.	U.S. Geological Survey	USGS		64.6083	-165.178	0.01				AAS	METAMORPHIC	UNKNOWN	UNKNOWN	MARBLE
BDN091		USGS		Geochemistry of rock samples from the National Geochemical Database: U.S. Geological Survey, Reston, VA.	U.S. Geological Survey	USGS		64.7292	-165.157	0.01				ES	METAMORPHIC	UNKNOWN	UNKNOWN	MARBLE																						2	700	7	5	30
BDN092		USGS		Geochemistry of rock samples from the National Geochemical Database: U.S. Geological Survey, Reston, VA.	U.S. Geological Survey	USGS		64.7222	-165.139	0.01				AAS	METAMORPHIC	UNKNOWN	UNKNOWN	MARBLE
BDN092		USGS		Geochemistry of rock samples from the National Geochemical Database: U.S. Geological Survey, Reston, VA.	U.S. Geological Survey	USGS		64.7222	-165.139	0.01				ES	METAMORPHIC	UNKNOWN	UNKNOWN	MARBLE																						1.5	1000	20		50
BDN093		USGS		Geochemistry of rock samples from the National Geochemical Database: U.S. Geological Survey, Reston, VA.	U.S. Geological Survey	USGS		64.7153	-165.153	0.01				AAS	METAMORPHIC	UNKNOWN	UNKNOWN	MARBLE
BDN093		USGS		Geochemistry of rock samples from the National Geochemical Database: U.S. Geological Survey, Reston, VA.	U.S. Geological Survey	USGS		64.7153	-165.153	0.01				ES	METAMORPHIC	UNKNOWN	UNKNOWN	MARBLE																						1.5	3000	15	5	30
BDN095		USGS		Geochemistry of rock samples from the National Geochemical Database: U.S. Geological Survey, Reston, VA.	U.S. Geological Survey	USGS		64.6556	-165.161	0.01				AAS	METAMORPHIC	UNKNOWN	UNKNOWN	MARBLE
BDN095		USGS		Geochemistry of rock samples from the National Geochemical Database: U.S. Geological Survey, Reston, VA.	U.S. Geological Survey	USGS		64.6556	-165.161	0.01				ES	METAMORPHIC	UNKNOWN	UNKNOWN	MARBLE																						1.5	300	7		10
BDN097		USGS		Geochemistry of rock samples from the National Geochemical Database: U.S. Geological Survey, Reston, VA.	U.S. Geological Survey	USGS		64.6083	-165.178	0.01				ES	METAMORPHIC	UNKNOWN	UNKNOWN	MARBLE																						1	300	5		70
BDN098		USGS		Geochemistry of rock samples from the National Geochemical Database: U.S. Geological Survey, Reston, VA.	U.S. Geological Survey	USGS		64.6028	-165.225	0.01				AAS	METAMORPHIC	UNKNOWN	UNKNOWN	MARBLE
BDN098		USGS		Geochemistry of rock samples from the National Geochemical Database: U.S. Geological Survey, Reston, VA.	U.S. Geological Survey	USGS		64.6028	-165.225	0.01				ES	METAMORPHIC	UNKNOWN	UNKNOWN	MARBLE																						0.7	500			7
BDN099		USGS		Geochemistry of rock samples from the National Geochemical Database: U.S. Geological Survey, Reston, VA.	U.S. Geological Survey	USGS		64.6069	-165.213	0.01				AAS	METAMORPHIC	UNKNOWN	UNKNOWN	MARBLE
BDN099		USGS		Geochemistry of rock samples from the National Geochemical Database: U.S. Geological Survey, Reston, VA.	U.S. Geological Survey	USGS		64.6069	-165.213	0.01				ES	METAMORPHIC	UNKNOWN	UNKNOWN	MARBLE																						1.5	150	20		30
BDN100		USGS		Geochemistry of rock samples from the National Geochemical Database: U.S. Geological Survey, Reston, VA.	U.S. Geological Survey	USGS		64.6319	-165.411	0.01				AAS	METAMORPHIC	UNKNOWN	UNKNOWN	MARBLE
BDN100		USGS		Geochemistry of rock samples from the National Geochemical Database: U.S. Geological Survey, Reston, VA.	U.S. Geological Survey	USGS		64.6319	-165.411	0.01				ES	METAMORPHIC	UNKNOWN	UNKNOWN	MARBLE																						0.2	70			7
BDN101		USGS		Geochemistry of rock samples from the National Geochemical Database: U.S. Geological Survey, Reston, VA.	U.S. Geological Survey	USGS		64.6972	-165.379	0.01				AAS	METAMORPHIC	UNKNOWN	UNKNOWN	MARBLE
BDN101		USGS		Geochemistry of rock samples from the National Geochemical Database: U.S. Geological Survey, Reston, VA.	U.S. Geological Survey	USGS		64.6972	-165.379	0.01				ES	METAMORPHIC	UNKNOWN	UNKNOWN	MARBLE																						0.3	150			7
BDN102		USGS		Geochemistry of rock samples from the National Geochemical Database: U.S. Geological Survey, Reston, VA.	U.S. Geological Survey	USGS		64.7	-165.442	0.01				AAS	METAMORPHIC	UNKNOWN	UNKNOWN	MARBLE
BDN102		USGS		Geochemistry of rock samples from the National Geochemical Database: U.S. Geological Survey, Reston, VA.	U.S. Geological Survey	USGS		64.7	-165.442	0.01				ES	METAMORPHIC	UNKNOWN	UNKNOWN	MARBLE																						2	1500			20
BDN103		USGS		Geochemistry of rock samples from the National Geochemical Database: U.S. Geological Survey, Reston, VA.	U.S. Geological Survey	USGS		64.5861	-165.404	0.01				AAS	METAMORPHIC	UNKNOWN	UNKNOWN	MARBLE
BDN103		USGS		Geochemistry of rock samples from the National Geochemical Database: U.S. Geological Survey, Reston, VA.	U.S. Geological Survey	USGS		64.5861	-165.404	0.01				ES	METAMORPHIC	UNKNOWN	UNKNOWN	MARBLE																						0.3	30			15
BDN104		USGS		Geochemistry of rock samples from the National Geochemical Database: U.S. Geological Survey, Reston, VA.	U.S. Geological Survey	USGS		64.5583	-165.367	0.01				AAS	METAMORPHIC	UNKNOWN	UNKNOWN	MARBLE
BDN104		USGS		Geochemistry of rock samples from the National Geochemical Database: U.S. Geological Survey, Reston, VA.	U.S. Geological Survey	USGS		64.5583	-165.367	0.01				ES	METAMORPHIC	UNKNOWN	UNKNOWN	MARBLE																						0.15	150			5
BDN105		USGS		Geochemistry of rock samples from the National Geochemical Database: U.S. Geological Survey, Reston, VA.	U.S. Geological Survey	USGS		64.5986	-165.331	0.01				AAS	METAMORPHIC	UNKNOWN	UNKNOWN	MARBLE
BDN105		USGS		Geochemistry of rock samples from the National Geochemical Database: U.S. Geological Survey, Reston, VA.	U.S. Geological Survey	USGS		64.5986	-165.331	0.01				ES	METAMORPHIC	UNKNOWN	UNKNOWN	MARBLE																						1	1500			10
BDN109		USGS		Geochemistry of rock samples from the National Geochemical Database: U.S. Geological Survey, Reston, VA.	U.S. Geological Survey	USGS		64.9361	-165.008	0.01				ES	METAMORPHIC	UNKNOWN	UNKNOWN	MARBLE																							15			5
BDN107		USGS		Geochemistry of rock samples from the National Geochemical Database: U.S. Geological Survey, Reston, VA.	U.S. Geological Survey	USGS		64.9014	-165.172	0.01				AAS	METAMORPHIC	UNKNOWN	UNKNOWN	MARBLE
BDN107		USGS		Geochemistry of rock samples from the National Geochemical Database: U.S. Geological Survey, Reston, VA.	U.S. Geological Survey	USGS		64.9014	-165.172	0.01				ES	METAMORPHIC	UNKNOWN	UNKNOWN	MARBLE																						0.1	150			7
BDN108		USGS		Geochemistry of rock samples from the National Geochemical Database: U.S. Geological Survey, Reston, VA.	U.S. Geological Survey	USGS		64.9139	-165.09	0.01				AAS	METAMORPHIC	UNKNOWN	UNKNOWN	MARBLE
BDN108		USGS		Geochemistry of rock samples from the National Geochemical Database: U.S. Geological Survey, Reston, VA.	U.S. Geological Survey	USGS		64.9139	-165.09	0.01				ES	METAMORPHIC	UNKNOWN	UNKNOWN	MARBLE																						0.3	150			5
BDN109		USGS		Geochemistry of rock samples from the National Geochemical Database: U.S. Geological Survey, Reston, VA.	U.S. Geological Survey	USGS		64.9361	-165.008	0.01				AAS	METAMORPHIC	UNKNOWN	UNKNOWN	MARBLE
BDN110		USGS		Geochemistry of rock samples from the National Geochemical Database: U.S. Geological Survey, Reston, VA.	U.S. Geological Survey	USGS		64.8764	-165.081	0.01				AAS	METAMORPHIC	UNKNOWN	UNKNOWN	MARBLE
BDN110		USGS		Geochemistry of rock samples from the National Geochemical Database: U.S. Geological Survey, Reston, VA.	U.S. Geological Survey	USGS		64.8764	-165.081	0.01				ES	METAMORPHIC	UNKNOWN	UNKNOWN	MARBLE																						0.07	70
BDN111		USGS		Geochemistry of rock samples from the National Geochemical Database: U.S. Geological Survey, Reston, VA.	U.S. Geological Survey	USGS		64.8667	-165.071	0.01				AAS	METAMORPHIC	UNKNOWN	UNKNOWN	MARBLE
BDN111		USGS		Geochemistry of rock samples from the National Geochemical Database: U.S. Geological Survey, Reston, VA.	U.S. Geological Survey	USGS		64.8667	-165.071	0.01				ES	METAMORPHIC	UNKNOWN	UNKNOWN	MARBLE																						7	1500	7		30
BDN112		USGS		Geochemistry of rock samples from the National Geochemical Database: U.S. Geological Survey, Reston, VA.	U.S. Geological Survey	USGS		64.8472	-165.079	0.01				AAS	METAMORPHIC	UNKNOWN	UNKNOWN	MARBLE
BDN112		USGS		Geochemistry of rock samples from the National Geochemical Database: U.S. Geological Survey, Reston, VA.	U.S. Geological Survey	USGS		64.8472	-165.079	0.01				ES	METAMORPHIC	UNKNOWN	UNKNOWN	MARBLE																						0.2	150			15
BDN113		USGS		Geochemistry of rock samples from the National Geochemical Database: U.S. Geological Survey, Reston, VA.	U.S. Geological Survey	USGS		64.8472	-165.079	0.01				AAS	METAMORPHIC	UNKNOWN	UNKNOWN	MARBLE
BDN113		USGS		Geochemistry of rock samples from the National Geochemical Database: U.S. Geological Survey, Reston, VA.	U.S. Geological Survey	USGS		64.8472	-165.079	0.01				ES	METAMORPHIC	UNKNOWN	UNKNOWN	MARBLE																						2	1500	10	7	20
BDN114		USGS		Geochemistry of rock samples from the National Geochemical Database: U.S. Geological Survey, Reston, VA.	U.S. Geological Survey	USGS		64.8458	-165.042	0.01				AAS	METAMORPHIC	UNKNOWN	UNKNOWN	MARBLE
BDN114		USGS		Geochemistry of rock samples from the National Geochemical Database: U.S. Geological Survey, Reston, VA.	U.S. Geological Survey	USGS		64.8458	-165.042	0.01				ES	METAMORPHIC	UNKNOWN	UNKNOWN	MARBLE																						1.5	3000	5		20
BDN115		USGS		Geochemistry of rock samples from the National Geochemical Database: U.S. Geological Survey, Reston, VA.	U.S. Geological Survey	USGS		64.85	-165.044	0.01				AAS	METAMORPHIC	UNKNOWN	UNKNOWN	MARBLE
BDN115		USGS		Geochemistry of rock samples from the National Geochemical Database: U.S. Geological Survey, Reston, VA.	U.S. Geological Survey	USGS		64.85	-165.044	0.01				ES	METAMORPHIC	UNKNOWN	UNKNOWN	MARBLE																						0.7	700			10
BDN116		USGS		Geochemistry of rock samples from the National Geochemical Database: U.S. Geological Survey, Reston, VA.	U.S. Geological Survey	USGS		64.8097	-165.213	0.01				AAS	METAMORPHIC	UNKNOWN	UNKNOWN	MARBLE
BDN116		USGS		Geochemistry of rock samples from the National Geochemical Database: U.S. Geological Survey, Reston, VA.	U.S. Geological Survey	USGS		64.8097	-165.213	0.01				ES	METAMORPHIC	UNKNOWN	UNKNOWN	MARBLE																						1	1000	7		7
BDN118		USGS		Geochemistry of rock samples from the National Geochemical Database: U.S. Geological Survey, Reston, VA.	U.S. Geological Survey	USGS		64.5806	-165.714	0.01				AAS	METAMORPHIC	UNKNOWN	UNKNOWN	MARBLE
BDN118		USGS		Geochemistry of rock samples from the National Geochemical Database: U.S. Geological Survey, Reston, VA.	U.S. Geological Survey	USGS		64.5806	-165.714	0.01				ES	METAMORPHIC	UNKNOWN	UNKNOWN	MARBLE																						0.1	50			5
BDN119		USGS		Geochemistry of rock samples from the National Geochemical Database: U.S. Geological Survey, Reston, VA.	U.S. Geological Survey	USGS		64.5875	-165.725	0.01				AAS	METAMORPHIC	UNKNOWN	UNKNOWN	MARBLE
BDN119		USGS		Geochemistry of rock samples from the National Geochemical Database: U.S. Geological Survey, Reston, VA.	U.S. Geological Survey	USGS		64.5875	-165.725	0.01				ES	METAMORPHIC	UNKNOWN	UNKNOWN	MARBLE
BDN120		USGS		Geochemistry of rock samples from the National Geochemical Database: U.S. Geological Survey, Reston, VA.	U.S. Geological Survey	USGS		64.5903	-165.736	0.01				AAS	METAMORPHIC	UNKNOWN	UNKNOWN	MARBLE
BDN120		USGS		Geochemistry of rock samples from the National Geochemical Database: U.S. Geological Survey, Reston, VA.	U.S. Geological Survey	USGS		64.5903	-165.736	0.01				ES	METAMORPHIC	UNKNOWN	UNKNOWN	MARBLE																						1.5	500			5
BDN121		USGS		Geochemistry of rock samples from the National Geochemical Database: U.S. Geological Survey, Reston, VA.	U.S. Geological Survey	USGS		64.5917	-165.725	0.01				AAS	METAMORPHIC	UNKNOWN	UNKNOWN	MARBLE
BDN121		USGS		Geochemistry of rock samples from the National Geochemical Database: U.S. Geological Survey, Reston, VA.	U.S. Geological Survey	USGS		64.5917	-165.725	0.01				ES	METAMORPHIC	UNKNOWN	UNKNOWN	MARBLE																						3	700			7
BDN123		USGS		Geochemistry of rock samples from the National Geochemical Database: U.S. Geological Survey, Reston, VA.	U.S. Geological Survey	USGS		64.7847	-165.167	0.01				AAS	METAMORPHIC	UNKNOWN	UNKNOWN	MARBLE
BDN123		USGS		Geochemistry of rock samples from the National Geochemical Database: U.S. Geological Survey, Reston, VA.	U.S. Geological Survey	USGS		64.7847	-165.167	0.01				COL	METAMORPHIC	UNKNOWN	UNKNOWN	MARBLE																													20
BDN123		USGS		Geochemistry of rock samples from the National Geochemical Database: U.S. Geological Survey, Reston, VA.	U.S. Geological Survey	USGS		64.7847	-165.167	0.01				ES	METAMORPHIC	UNKNOWN	UNKNOWN	MARBLE																						3	300			20
BDN124		USGS		Geochemistry of rock samples from the National Geochemical Database: U.S. Geological Survey, Reston, VA.	U.S. Geological Survey	USGS		64.7847	-165.167	0.01				AAS	METAMORPHIC	UNKNOWN	UNKNOWN	MARBLE
BDN124		USGS		Geochemistry of rock samples from the National Geochemical Database: U.S. Geological Survey, Reston, VA.	U.S. Geological Survey	USGS		64.7847	-165.167	0.01				COL	METAMORPHIC	UNKNOWN	UNKNOWN	MARBLE																													10
BDN124		USGS		Geochemistry of rock samples from the National Geochemical Database: U.S. Geological Survey, Reston, VA.	U.S. Geological Survey	USGS		64.7847	-165.167	0.01				ES	METAMORPHIC	UNKNOWN	UNKNOWN	MARBLE																						5	150	10	10	70
BDN125		USGS		Geochemistry of rock samples from the National Geochemical Database: U.S. Geological Survey, Reston, VA.	U.S. Geological Survey	USGS		64.7847	-165.167	0.01				AAS	METAMORPHIC	UNKNOWN	UNKNOWN	MARBLE
BDN125		USGS		Geochemistry of rock samples from the National Geochemical Database: U.S. Geological Survey, Reston, VA.	U.S. Geological Survey	USGS		64.7847	-165.167	0.01				ES	METAMORPHIC	UNKNOWN	UNKNOWN	MARBLE																						2	700			15
BDN126		USGS		Geochemistry of rock samples from the National Geochemical Database: U.S. Geological Survey, Reston, VA.	U.S. Geological Survey	USGS		64.7847	-165.167	0.01				AAS	METAMORPHIC	UNKNOWN	UNKNOWN	MARBLE
BDN126		USGS		Geochemistry of rock samples from the National Geochemical Database: U.S. Geological Survey, Reston, VA.	U.S. Geological Survey	USGS		64.7847	-165.167	0.01				ES	METAMORPHIC	UNKNOWN	UNKNOWN	MARBLE																						5	2000			70
BDN127		USGS		Geochemistry of rock samples from the National Geochemical Database: U.S. Geological Survey, Reston, VA.	U.S. Geological Survey	USGS		64.7847	-165.167	0.01				AAS	METAMORPHIC	UNKNOWN	UNKNOWN	MARBLE
BDN127		USGS		Geochemistry of rock samples from the National Geochemical Database: U.S. Geological Survey, Reston, VA.	U.S. Geological Survey	USGS		64.7847	-165.167	0.01				ES	METAMORPHIC	UNKNOWN	UNKNOWN	MARBLE																						0.15	300			50
BDN128		USGS		Geochemistry of rock samples from the National Geochemical Database: U.S. Geological Survey, Reston, VA.	U.S. Geological Survey	USGS		64.7847	-165.167	0.01				AAS	METAMORPHIC	UNKNOWN	UNKNOWN	MARBLE
BDN128		USGS		Geochemistry of rock samples from the National Geochemical Database: U.S. Geological Survey, Reston, VA.	U.S. Geological Survey	USGS		64.7847	-165.167	0.01				ES	METAMORPHIC	UNKNOWN	UNKNOWN	MARBLE																						15	2000		20	50
BDN129		USGS		Geochemistry of rock samples from the National Geochemical Database: U.S. Geological Survey, Reston, VA.	U.S. Geological Survey	USGS		64.7847	-165.167	0.01				AAS	METAMORPHIC	UNKNOWN	UNKNOWN	MARBLE
BDN129		USGS		Geochemistry of rock samples from the National Geochemical Database: U.S. Geological Survey, Reston, VA.	U.S. Geological Survey	USGS		64.7847	-165.167	0.01				ES	METAMORPHIC	UNKNOWN	UNKNOWN	MARBLE																						1.5	500			10
BDN130		USGS		Geochemistry of rock samples from the National Geochemical Database: U.S. Geological Survey, Reston, VA.	U.S. Geological Survey	USGS		64.7847	-165.167	0.01				AAS	METAMORPHIC	UNKNOWN	UNKNOWN	MARBLE
BDN130		USGS		Geochemistry of rock samples from the National Geochemical Database: U.S. Geological Survey, Reston, VA.	U.S. Geological Survey	USGS		64.7847	-165.167	0.01				ES	METAMORPHIC	UNKNOWN	UNKNOWN	MARBLE																						15	3000		30	150
BDN131		USGS		Geochemistry of rock samples from the National Geochemical Database: U.S. Geological Survey, Reston, VA.	U.S. Geological Survey	USGS		64.7847	-165.167	0.01				AAS	METAMORPHIC	UNKNOWN	UNKNOWN	MARBLE
BDN131		USGS		Geochemistry of rock samples from the National Geochemical Database: U.S. Geological Survey, Reston, VA.	U.S. Geological Survey	USGS		64.7847	-165.167	0.01				ES	METAMORPHIC	UNKNOWN	UNKNOWN	MARBLE																						10	1000		70	700
BDN132		USGS		Geochemistry of rock samples from the National Geochemical Database: U.S. Geological Survey, Reston, VA.	U.S. Geological Survey	USGS		64.7847	-165.167	0.01				AAS	METAMORPHIC	UNKNOWN	UNKNOWN	MARBLE
BDN132		USGS		Geochemistry of rock samples from the National Geochemical Database: U.S. Geological Survey, Reston, VA.	U.S. Geological Survey	USGS		64.7847	-165.167	0.01				ES	METAMORPHIC	UNKNOWN	UNKNOWN	MARBLE																						10	2000	20	30	200
BDN133		USGS		Geochemistry of rock samples from the National Geochemical Database: U.S. Geological Survey, Reston, VA.	U.S. Geological Survey	USGS		64.7847	-165.167	0.01				AAS	METAMORPHIC	UNKNOWN	UNKNOWN	MARBLE
BDN133		USGS		Geochemistry of rock samples from the National Geochemical Database: U.S. Geological Survey, Reston, VA.	U.S. Geological Survey	USGS		64.7847	-165.167	0.01				ES	METAMORPHIC	UNKNOWN	UNKNOWN	MARBLE																						5	1500		15	50
BDN134		USGS		Geochemistry of rock samples from the National Geochemical Database: U.S. Geological Survey, Reston, VA.	U.S. Geological Survey	USGS		64.7847	-165.167	0.01				AAS	METAMORPHIC	UNKNOWN	UNKNOWN	MARBLE
BDN134		USGS		Geochemistry of rock samples from the National Geochemical Database: U.S. Geological Survey, Reston, VA.	U.S. Geological Survey	USGS		64.7847	-165.167	0.01				ES	METAMORPHIC	UNKNOWN	UNKNOWN	MARBLE																						5	1000		10	50
BDN135		USGS		Geochemistry of rock samples from the National Geochemical Database: U.S. Geological Survey, Reston, VA.	U.S. Geological Survey	USGS		64.8694	-165.221	0.01				AAS	METAMORPHIC	UNKNOWN	UNKNOWN	MARBLE
BDN135		USGS		Geochemistry of rock samples from the National Geochemical Database: U.S. Geological Survey, Reston, VA.	U.S. Geological Survey	USGS		64.8694	-165.221	0.01				ES	METAMORPHIC	UNKNOWN	UNKNOWN	MARBLE																						0.3	700			7
BDN136		USGS		Geochemistry of rock samples from the National Geochemical Database: U.S. Geological Survey, Reston, VA.	U.S. Geological Survey	USGS		64.8694	-165.221	0.01				AAS	METAMORPHIC	UNKNOWN	UNKNOWN	MARBLE
BDN136		USGS		Geochemistry of rock samples from the National Geochemical Database: U.S. Geological Survey, Reston, VA.	U.S. Geological Survey	USGS		64.8694	-165.221	0.01				ES	METAMORPHIC	UNKNOWN	UNKNOWN	MARBLE																						5	700	20	10	10
BDN137		USGS		Geochemistry of rock samples from the National Geochemical Database: U.S. Geological Survey, Reston, VA.	U.S. Geological Survey	USGS		64.8694	-165.221	0.01				AAS	METAMORPHIC	UNKNOWN	UNKNOWN	MARBLE
BDN137		USGS		Geochemistry of rock samples from the National Geochemical Database: U.S. Geological Survey, Reston, VA.	U.S. Geological Survey	USGS		64.8694	-165.221	0.01				ES	METAMORPHIC	UNKNOWN	UNKNOWN	MARBLE																						1.5	300	7		7
BDN138		USGS		Geochemistry of rock samples from the National Geochemical Database: U.S. Geological Survey, Reston, VA.	U.S. Geological Survey	USGS		64.8805	-165.213	0.01				AAS	METAMORPHIC	UNKNOWN	UNKNOWN	MARBLE
BDN138		USGS		Geochemistry of rock samples from the National Geochemical Database: U.S. Geological Survey, Reston, VA.	U.S. Geological Survey	USGS		64.8805	-165.213	0.01				ES	METAMORPHIC	UNKNOWN	UNKNOWN	MARBLE																						0.7	500			7
BDN139		USGS		Geochemistry of rock samples from the National Geochemical Database: U.S. Geological Survey, Reston, VA.	U.S. Geological Survey	USGS		64.8805	-165.213	0.01				AAS	METAMORPHIC	UNKNOWN	UNKNOWN	MARBLE
BDN139		USGS		Geochemistry of rock samples from the National Geochemical Database: U.S. Geological Survey, Reston, VA.	U.S. Geological Survey	USGS		64.8805	-165.213	0.01				ES	METAMORPHIC	UNKNOWN	UNKNOWN	MARBLE																						2	700	7		10
BDN140		USGS		Geochemistry of rock samples from the National Geochemical Database: U.S. Geological Survey, Reston, VA.	U.S. Geological Survey	USGS		64.8805	-165.213	0.01				AAS	METAMORPHIC	UNKNOWN	UNKNOWN	MARBLE
BDN140		USGS		Geochemistry of rock samples from the National Geochemical Database: U.S. Geological Survey, Reston, VA.	U.S. Geological Survey	USGS		64.8805	-165.213	0.01				ES	METAMORPHIC	UNKNOWN	UNKNOWN	MARBLE																						3	700	7	10	15
BDN141		USGS		Geochemistry of rock samples from the National Geochemical Database: U.S. Geological Survey, Reston, VA.	U.S. Geological Survey	USGS		64.8805	-165.213	0.01				AAS	METAMORPHIC	UNKNOWN	UNKNOWN	MARBLE
BDN141		USGS		Geochemistry of rock samples from the National Geochemical Database: U.S. Geological Survey, Reston, VA.	U.S. Geological Survey	USGS		64.8805	-165.213	0.01				ES	METAMORPHIC	UNKNOWN	UNKNOWN	MARBLE																						1.5	700	5		7
BDN142		USGS		Geochemistry of rock samples from the National Geochemical Database: U.S. Geological Survey, Reston, VA.	U.S. Geological Survey	USGS		64.8805	-165.213	0.01				AAS	METAMORPHIC	UNKNOWN	UNKNOWN	MARBLE
BDN142		USGS		Geochemistry of rock samples from the National Geochemical Database: U.S. Geological Survey, Reston, VA.	U.S. Geological Survey	USGS		64.8805	-165.213	0.01				ES	METAMORPHIC	UNKNOWN	UNKNOWN	MARBLE																						1	500	7		10
BDN143		USGS		Geochemistry of rock samples from the National Geochemical Database: U.S. Geological Survey, Reston, VA.	U.S. Geological Survey	USGS		64.8111	-165.25	0.01				AAS	METAMORPHIC	UNKNOWN	UNKNOWN	MARBLE
BDN143		USGS		Geochemistry of rock samples from the National Geochemical Database: U.S. Geological Survey, Reston, VA.	U.S. Geological Survey	USGS		64.8111	-165.25	0.01				ES	METAMORPHIC	UNKNOWN	UNKNOWN	MARBLE																						3	500	30	15	70
BDN144		USGS		Geochemistry of rock samples from the National Geochemical Database: U.S. Geological Survey, Reston, VA.	U.S. Geological Survey	USGS		64.8111	-165.25	0.01				AAS	METAMORPHIC	UNKNOWN	UNKNOWN	MARBLE
BDN144		USGS		Geochemistry of rock samples from the National Geochemical Database: U.S. Geological Survey, Reston, VA.	U.S. Geological Survey	USGS		64.8111	-165.25	0.01				COL	METAMORPHIC	UNKNOWN	UNKNOWN	MARBLE																													150
BDN144		USGS		Geochemistry of rock samples from the National Geochemical Database: U.S. Geological Survey, Reston, VA.	U.S. Geological Survey	USGS		64.8111	-165.25	0.01				ES	METAMORPHIC	UNKNOWN	UNKNOWN	MARBLE																						0.7	15			15
BDN145		USGS		Geochemistry of rock samples from the National Geochemical Database: U.S. Geological Survey, Reston, VA.	U.S. Geological Survey	USGS		64.8111	-165.25	0.01				AAS	METAMORPHIC	UNKNOWN	UNKNOWN	MARBLE
BDN145		USGS		Geochemistry of rock samples from the National Geochemical Database: U.S. Geological Survey, Reston, VA.	U.S. Geological Survey	USGS		64.8111	-165.25	0.01				ES	METAMORPHIC	UNKNOWN	UNKNOWN	MARBLE																						5	1000	30	15	15
BDN146		USGS		Geochemistry of rock samples from the National Geochemical Database: U.S. Geological Survey, Reston, VA.	U.S. Geological Survey	USGS		64.8111	-165.25	0.01				AAS	METAMORPHIC	UNKNOWN	UNKNOWN	MARBLE
BDN155		USGS		Geochemistry of rock samples from the National Geochemical Database: U.S. Geological Survey, Reston, VA.	U.S. Geological Survey	USGS		64.793	-165.289	0.01				AAS	METAMORPHIC	UNKNOWN	UNKNOWN	MARBLE
BDN146		USGS		Geochemistry of rock samples from the National Geochemical Database: U.S. Geological Survey, Reston, VA.	U.S. Geological Survey	USGS		64.8111	-165.25	0.01				ES	METAMORPHIC	UNKNOWN	UNKNOWN	MARBLE																						5	1000	7	7	7
BDN147		USGS		Geochemistry of rock samples from the National Geochemical Database: U.S. Geological Survey, Reston, VA.	U.S. Geological Survey	USGS		64.8111	-165.25	0.01				AAS	METAMORPHIC	UNKNOWN	UNKNOWN	MARBLE
BDN147		USGS		Geochemistry of rock samples from the National Geochemical Database: U.S. Geological Survey, Reston, VA.	U.S. Geological Survey	USGS		64.8111	-165.25	0.01				ES	METAMORPHIC	UNKNOWN	UNKNOWN	MARBLE																						3	1500	50	7	20
BDN150		USGS		Geochemistry of rock samples from the National Geochemical Database: U.S. Geological Survey, Reston, VA.	U.S. Geological Survey	USGS		64.775	-165.258	0.01				AAS	METAMORPHIC	UNKNOWN	UNKNOWN	MARBLE
BDN150		USGS		Geochemistry of rock samples from the National Geochemical Database: U.S. Geological Survey, Reston, VA.	U.S. Geological Survey	USGS		64.775	-165.258	0.01				ES	METAMORPHIC	UNKNOWN	UNKNOWN	MARBLE																						0.07	200			20
BDN151		USGS		Geochemistry of rock samples from the National Geochemical Database: U.S. Geological Survey, Reston, VA.	U.S. Geological Survey	USGS		64.7722	-165.258	0.01				AAS	METAMORPHIC	UNKNOWN	UNKNOWN	MARBLE
BDN151		USGS		Geochemistry of rock samples from the National Geochemical Database: U.S. Geological Survey, Reston, VA.	U.S. Geological Survey	USGS		64.7722	-165.258	0.01				ES	METAMORPHIC	UNKNOWN	UNKNOWN	MARBLE																						7	1000	20	7	30
BDN153		USGS		Geochemistry of rock samples from the National Geochemical Database: U.S. Geological Survey, Reston, VA.	U.S. Geological Survey	USGS		64.7569	-165.242	0.01				AAS	METAMORPHIC	UNKNOWN	UNKNOWN	MARBLE
BDN153		USGS		Geochemistry of rock samples from the National Geochemical Database: U.S. Geological Survey, Reston, VA.	U.S. Geological Survey	USGS		64.7569	-165.242	0.01				ES	METAMORPHIC	UNKNOWN	UNKNOWN	MARBLE																						10	1000	50	20	10		300
BDN154		USGS		Geochemistry of rock samples from the National Geochemical Database: U.S. Geological Survey, Reston, VA.	U.S. Geological Survey	USGS		64.793	-165.289	0.01				AAS	METAMORPHIC	UNKNOWN	UNKNOWN	MARBLE
BDN154		USGS		Geochemistry of rock samples from the National Geochemical Database: U.S. Geological Survey, Reston, VA.	U.S. Geological Survey	USGS		64.793	-165.289	0.01				COL	METAMORPHIC	UNKNOWN	UNKNOWN	MARBLE																													10
BDN154		USGS		Geochemistry of rock samples from the National Geochemical Database: U.S. Geological Survey, Reston, VA.	U.S. Geological Survey	USGS		64.793	-165.289	0.01				ES	METAMORPHIC	UNKNOWN	UNKNOWN	MARBLE																						0.15	150			20
BDN155		USGS		Geochemistry of rock samples from the National Geochemical Database: U.S. Geological Survey, Reston, VA.	U.S. Geological Survey	USGS		64.793	-165.289	0.01				ES	METAMORPHIC	UNKNOWN	UNKNOWN	MARBLE																						0.3	300			30
BDN156		USGS		Geochemistry of rock samples from the National Geochemical Database: U.S. Geological Survey, Reston, VA.	U.S. Geological Survey	USGS		64.793	-165.289	0.01				AAS	METAMORPHIC	UNKNOWN	UNKNOWN	MARBLE
BDN156		USGS		Geochemistry of rock samples from the National Geochemical Database: U.S. Geological Survey, Reston, VA.	U.S. Geological Survey	USGS		64.793	-165.289	0.01				ES	METAMORPHIC	UNKNOWN	UNKNOWN	MARBLE																						10	1000	100	50	30
BDN157		USGS		Geochemistry of rock samples from the National Geochemical Database: U.S. Geological Survey, Reston, VA.	U.S. Geological Survey	USGS		64.793	-165.289	0.01				AAS	METAMORPHIC	UNKNOWN	UNKNOWN	MARBLE
BDN157		USGS		Geochemistry of rock samples from the National Geochemical Database: U.S. Geological Survey, Reston, VA.	U.S. Geological Survey	USGS		64.793	-165.289	0.01				ES	METAMORPHIC	UNKNOWN	UNKNOWN	MARBLE																						1	30		5	70
BDN158		USGS		Geochemistry of rock samples from the National Geochemical Database: U.S. Geological Survey, Reston, VA.	U.S. Geological Survey	USGS		64.793	-165.289	0.01				AAS	METAMORPHIC	UNKNOWN	UNKNOWN	MARBLE
BDN158		USGS		Geochemistry of rock samples from the National Geochemical Database: U.S. Geological Survey, Reston, VA.	U.S. Geological Survey	USGS		64.793	-165.289	0.01				COL	METAMORPHIC	UNKNOWN	UNKNOWN	MARBLE																													2000
BDN158		USGS		Geochemistry of rock samples from the National Geochemical Database: U.S. Geological Survey, Reston, VA.	U.S. Geological Survey	USGS		64.793	-165.289	0.01				ES	METAMORPHIC	UNKNOWN	UNKNOWN	MARBLE																						5	700	50	15	30				0.5
BDN159		USGS		Geochemistry of rock samples from the National Geochemical Database: U.S. Geological Survey, Reston, VA.	U.S. Geological Survey	USGS		64.7042	-165.611	0.01				AAS	METAMORPHIC	UNKNOWN	UNKNOWN	MARBLE
BDN159		USGS		Geochemistry of rock samples from the National Geochemical Database: U.S. Geological Survey, Reston, VA.	U.S. Geological Survey	USGS		64.7042	-165.611	0.01				COL	METAMORPHIC	UNKNOWN	UNKNOWN	MARBLE																													20
BDN159		USGS		Geochemistry of rock samples from the National Geochemical Database: U.S. Geological Survey, Reston, VA.	U.S. Geological Survey	USGS		64.7042	-165.611	0.01				ES	METAMORPHIC	UNKNOWN	UNKNOWN	MARBLE																						1.5	300			15
BDN162		USGS		Geochemistry of rock samples from the National Geochemical Database: U.S. Geological Survey, Reston, VA.	U.S. Geological Survey	USGS		64.6917	-165.143	0.01				AAS	METAMORPHIC	UNKNOWN	UNKNOWN	MARBLE
BDN162		USGS		Geochemistry of rock samples from the National Geochemical Database: U.S. Geological Survey, Reston, VA.	U.S. Geological Survey	USGS		64.6917	-165.143	0.01				COL	METAMORPHIC	UNKNOWN	UNKNOWN	MARBLE																													10
BDN162		USGS		Geochemistry of rock samples from the National Geochemical Database: U.S. Geological Survey, Reston, VA.	U.S. Geological Survey	USGS		64.6917	-165.143	0.01				ES	METAMORPHIC	UNKNOWN	UNKNOWN	MARBLE																						3	100			10
BDN163		USGS		Geochemistry of rock samples from the National Geochemical Database: U.S. Geological Survey, Reston, VA.	U.S. Geological Survey	USGS		64.693	-165.143	0.01				AAS	METAMORPHIC	UNKNOWN	UNKNOWN	MARBLE
BDN163		USGS		Geochemistry of rock samples from the National Geochemical Database: U.S. Geological Survey, Reston, VA.	U.S. Geological Survey	USGS		64.693	-165.143	0.01				ES	METAMORPHIC	UNKNOWN	UNKNOWN	MARBLE																						0.3	70
BDO043		USGS		Geochemistry of rock samples from the National Geochemical Database: U.S. Geological Survey, Reston, VA.	U.S. Geological Survey	USGS		64.1667	-143.131	0.01				ES	METAMORPHIC	UNKNOWN	UNKNOWN	MARBLE																						7	1000	30	20	50
BDO049		USGS		Geochemistry of rock samples from the National Geochemical Database: U.S. Geological Survey, Reston, VA.	U.S. Geological Survey	USGS		64.5167	-142.312	0.01				ES	METAMORPHIC	UNKNOWN	UNKNOWN	MARBLE																						3	2000	30	5	7
BDO194		USGS		Geochemistry of rock samples from the National Geochemical Database: U.S. Geological Survey, Reston, VA.	U.S. Geological Survey	USGS		64.1667	-143.131	0.01				ES	METAMORPHIC	UNKNOWN	UNKNOWN	MARBLE																						7	1500	10	10
BDO271		USGS		Geochemistry of rock samples from the National Geochemical Database: U.S. Geological Survey, Reston, VA.	U.S. Geological Survey	USGS		64.3917	-143.114	0.01				ES	METAMORPHIC	UNKNOWN	UNKNOWN	MARBLE																						1.5	700	7		15
BDO355		USGS		Geochemistry of rock samples from the National Geochemical Database: U.S. Geological Survey, Reston, VA.	U.S. Geological Survey	USGS		64.1639	-142.408	0.01				AAS	METAMORPHIC	UNKNOWN	UNKNOWN	MARBLE
BDO355		USGS		Geochemistry of rock samples from the National Geochemical Database: U.S. Geological Survey, Reston, VA.	U.S. Geological Survey	USGS		64.1639	-142.408	0.01				ES	METAMORPHIC	UNKNOWN	UNKNOWN	MARBLE																						1.5	150	5		7
BDP273		USGS		Geochemistry of rock samples from the National Geochemical Database: U.S. Geological Survey, Reston, VA.	U.S. Geological Survey	USGS		64.75	-144.5	0.01				AAS	METAMORPHIC	UNKNOWN	UNKNOWN	MARBLE
BDP273		USGS		Geochemistry of rock samples from the National Geochemical Database: U.S. Geological Survey, Reston, VA.	U.S. Geological Survey	USGS		64.75	-144.5	0.01				ES	METAMORPHIC	UNKNOWN	UNKNOWN	MARBLE																						1.5	1000			10
BDP342		USGS		Geochemistry of rock samples from the National Geochemical Database: U.S. Geological Survey, Reston, VA.	U.S. Geological Survey	USGS		64.75	-144.5	0.01				ES	METAMORPHIC	UNKNOWN	UNKNOWN	MARBLE																						5	1500	30
BDP349		USGS		Geochemistry of rock samples from the National Geochemical Database: U.S. Geological Survey, Reston, VA.	U.S. Geological Survey	USGS		64.75	-144.5	0.01				ES	METAMORPHIC	UNKNOWN	UNKNOWN	MARBLE																						1	700	15
BDP408		USGS		Geochemistry of rock samples from the National Geochemical Database: U.S. Geological Survey, Reston, VA.	U.S. Geological Survey	USGS		64.75	-144.5	0.01				AAS	METAMORPHIC	UNKNOWN	UNKNOWN	MARBLE
BDP408		USGS		Geochemistry of rock samples from the National Geochemical Database: U.S. Geological Survey, Reston, VA.	U.S. Geological Survey	USGS		64.75	-144.5	0.01				ES	METAMORPHIC	UNKNOWN	UNKNOWN	MARBLE																						1	700	3000
BDP466		USGS		Geochemistry of rock samples from the National Geochemical Database: U.S. Geological Survey, Reston, VA.	U.S. Geological Survey	USGS		64.75	-144.5	0.01				AAS	METAMORPHIC	UNKNOWN	UNKNOWN	MARBLE
BDP466		USGS		Geochemistry of rock samples from the National Geochemical Database: U.S. Geological Survey, Reston, VA.	U.S. Geological Survey	USGS		64.75	-144.5	0.01				ES	METAMORPHIC	UNKNOWN	UNKNOWN	MARBLE																						0.15	200
BDP702		USGS		Geochemistry of rock samples from the National Geochemical Database: U.S. Geological Survey, Reston, VA.	U.S. Geological Survey	USGS		64.75	-144	0.01				AAS	METAMORPHIC	UNKNOWN	UNKNOWN	MARBLE
BDP702		USGS		Geochemistry of rock samples from the National Geochemical Database: U.S. Geological Survey, Reston, VA.	U.S. Geological Survey	USGS		64.75	-144	0.01				ES	METAMORPHIC	UNKNOWN	UNKNOWN	MARBLE																						1	700
BDV001		USGS		Geochemistry of rock samples from the National Geochemical Database: U.S. Geological Survey, Reston, VA.	U.S. Geological Survey	USGS		64.7042	-144.85	0.01				ES	METAMORPHIC	UNKNOWN	UNKNOWN	MARBLE																						3	1000	20	7	15
BDV003		USGS		Geochemistry of rock samples from the National Geochemical Database: U.S. Geological Survey, Reston, VA.	U.S. Geological Survey	USGS		64.7042	-144.85	0.01				ES	METAMORPHIC	UNKNOWN	UNKNOWN	MARBLE																						7	1000	70	30	30				0.5
BEB676		USGS		Geochemistry of rock samples from the National Geochemical Database: U.S. Geological Survey, Reston, VA.	U.S. Geological Survey	USGS		44.2528	-115.003	0.01	66	66	66	AAS	METAMORPHIC	UNKNOWN	UNKNOWN	MARBLE																										5		15
BEB676		USGS		Geochemistry of rock samples from the National Geochemical Database: U.S. Geological Survey, Reston, VA.	U.S. Geological Survey	USGS		44.2528	-115.003	0.01	66	66	66	COL	METAMORPHIC	UNKNOWN	UNKNOWN	MARBLE
BEB676		USGS		Geochemistry of rock samples from the National Geochemical Database: U.S. Geological Survey, Reston, VA.	U.S. Geological Survey	USGS		44.2528	-115.003	0.01	66	66	66	ES	METAMORPHIC	UNKNOWN	UNKNOWN	MARBLE																						0.7	150	5		7
BEQ317		USGS		Geochemistry of rock samples from the National Geochemical Database: U.S. Geological Survey, Reston, VA.	U.S. Geological Survey	USGS		44.8794	-115.342	0.01				AAS	METAMORPHIC	UNKNOWN	UNKNOWN	MARBLE
BEQ317		USGS		Geochemistry of rock samples from the National Geochemical Database: U.S. Geological Survey, Reston, VA.	U.S. Geological Survey	USGS		44.8794	-115.342	0.01				COL	METAMORPHIC	UNKNOWN	UNKNOWN	MARBLE
BEQ317		USGS		Geochemistry of rock samples from the National Geochemical Database: U.S. Geological Survey, Reston, VA.	U.S. Geological Survey	USGS		44.8794	-115.342	0.01				ES	METAMORPHIC	UNKNOWN	UNKNOWN	MARBLE																						3	1500	7		15
BEQ318		USGS		Geochemistry of rock samples from the National Geochemical Database: U.S. Geological Survey, Reston, VA.	U.S. Geological Survey	USGS		44.8775	-115.342	0.01				AAS	METAMORPHIC	UNKNOWN	UNKNOWN	MARBLE
BEQ318		USGS		Geochemistry of rock samples from the National Geochemical Database: U.S. Geological Survey, Reston, VA.	U.S. Geological Survey	USGS		44.8775	-115.342	0.01				ES	METAMORPHIC	UNKNOWN	UNKNOWN	MARBLE																						3	300	7		30
BEQ319		USGS		Geochemistry of rock samples from the National Geochemical Database: U.S. Geological Survey, Reston, VA.	U.S. Geological Survey	USGS		44.8856	-115.331	0.01				AAS	METAMORPHIC	UNKNOWN	UNKNOWN	MARBLE
BEQ319		USGS		Geochemistry of rock samples from the National Geochemical Database: U.S. Geological Survey, Reston, VA.	U.S. Geological Survey	USGS		44.8856	-115.331	0.01				COL	METAMORPHIC	UNKNOWN	UNKNOWN	MARBLE
BEQ319		USGS		Geochemistry of rock samples from the National Geochemical Database: U.S. Geological Survey, Reston, VA.	U.S. Geological Survey	USGS		44.8856	-115.331	0.01				ES	METAMORPHIC	UNKNOWN	UNKNOWN	MARBLE																						0.7	100	7		30
BEQ421		USGS		Geochemistry of rock samples from the National Geochemical Database: U.S. Geological Survey, Reston, VA.	U.S. Geological Survey	USGS		44.8814	-115.355	0.01				AAS	METAMORPHIC	UNKNOWN	UNKNOWN	MARBLE
BEQ421		USGS		Geochemistry of rock samples from the National Geochemical Database: U.S. Geological Survey, Reston, VA.	U.S. Geological Survey	USGS		44.8814	-115.355	0.01				COL	METAMORPHIC	UNKNOWN	UNKNOWN	MARBLE
BEQ421		USGS		Geochemistry of rock samples from the National Geochemical Database: U.S. Geological Survey, Reston, VA.	U.S. Geological Survey	USGS		44.8814	-115.355	0.01				ES	METAMORPHIC	UNKNOWN	UNKNOWN	MARBLE																						5	700	30	5	30
BFW141		USGS		Geochemistry of rock samples from the National Geochemical Database: U.S. Geological Survey, Reston, VA.	U.S. Geological Survey	USGS		54.75	-133	0.01				AAS	METAMORPHIC	UNKNOWN	UNKNOWN	MARBLE
BFW141		USGS		Geochemistry of rock samples from the National Geochemical Database: U.S. Geological Survey, Reston, VA.	U.S. Geological Survey	USGS		54.75	-133	0.01				ES	METAMORPHIC	UNKNOWN	UNKNOWN	MARBLE																						10	1500	30	30	50
BFW142		USGS		Geochemistry of rock samples from the National Geochemical Database: U.S. Geological Survey, Reston, VA.	U.S. Geological Survey	USGS		54.75	-133	0.01				AAS	METAMORPHIC	UNKNOWN	UNKNOWN	MARBLE
BFW142		USGS		Geochemistry of rock samples from the National Geochemical Database: U.S. Geological Survey, Reston, VA.	U.S. Geological Survey	USGS		54.75	-133	0.01				ES	METAMORPHIC	UNKNOWN	UNKNOWN	MARBLE																						7	700	70	30	70
BFW158		USGS		Geochemistry of rock samples from the National Geochemical Database: U.S. Geological Survey, Reston, VA.	U.S. Geological Survey	USGS		54.75	-133	0.01				AAS	METAMORPHIC	UNKNOWN	UNKNOWN	MARBLE
BFW158		USGS		Geochemistry of rock samples from the National Geochemical Database: U.S. Geological Survey, Reston, VA.	U.S. Geological Survey	USGS		54.75	-133	0.01				ES	METAMORPHIC	UNKNOWN	UNKNOWN	MARBLE																						3	700	50	15	50
BFW164		USGS		Geochemistry of rock samples from the National Geochemical Database: U.S. Geological Survey, Reston, VA.	U.S. Geological Survey	USGS		54.75	-133	0.01				AAS	METAMORPHIC	UNKNOWN	UNKNOWN	MARBLE
BFW164		USGS		Geochemistry of rock samples from the National Geochemical Database: U.S. Geological Survey, Reston, VA.	U.S. Geological Survey	USGS		54.75	-133	0.01				ES	METAMORPHIC	UNKNOWN	UNKNOWN	MARBLE																							30
BGW072		USGS		Geochemistry of rock samples from the National Geochemical Database: U.S. Geological Survey, Reston, VA.	U.S. Geological Survey	USGS		45.0361	-109.933	0.01	3	3	3	AAS	METAMORPHIC	UNKNOWN	UNKNOWN	MARBLE
BGW072		USGS		Geochemistry of rock samples from the National Geochemical Database: U.S. Geological Survey, Reston, VA.	U.S. Geological Survey	USGS		45.0361	-109.933	0.01	3	3	3	ES	METAMORPHIC	UNKNOWN	UNKNOWN	MARBLE																						5	1000	5	70	3000	150			5
C102471		USGS		Geochemistry of rock samples from the National Geochemical Database: U.S. Geological Survey, Reston, VA.	U.S. Geological Survey	USGS		64.2478	-141.145	0.01				FAP	METAMORPHIC	UNKNOWN	UNKNOWN	MARBLE
C102472		USGS		Geochemistry of rock samples from the National Geochemical Database: U.S. Geological Survey, Reston, VA.	U.S. Geological Survey	USGS		64.2478	-141.145	0.01				FAP	METAMORPHIC	UNKNOWN	UNKNOWN	MARBLE
C102488		USGS		Geochemistry of rock samples from the National Geochemical Database: U.S. Geological Survey, Reston, VA.	U.S. Geological Survey	USGS		64.2517	-141.778	0.01				FAP	METAMORPHIC	UNKNOWN	UNKNOWN	MARBLE
C124083		USGS		Geochemistry of rock samples from the National Geochemical Database: U.S. Geological Survey, Reston, VA.	U.S. Geological Survey	USGS		64.1411	-141.12	0.01				FAP	METAMORPHIC	UNKNOWN	UNKNOWN	MARBLE
C124112		USGS		Geochemistry of rock samples from the National Geochemical Database: U.S. Geological Survey, Reston, VA.	U.S. Geological Survey	USGS		64.2531	-141.079	0.01				FAP	METAMORPHIC	UNKNOWN	UNKNOWN	MARBLE
C124121		USGS		Geochemistry of rock samples from the National Geochemical Database: U.S. Geological Survey, Reston, VA.	U.S. Geological Survey	USGS		64.2514	-141.379	0.01				FAP	METAMORPHIC	UNKNOWN	UNKNOWN	MARBLE
C153989		USGS		Geochemistry of rock samples from the National Geochemical Database: U.S. Geological Survey, Reston, VA.	U.S. Geological Survey	USGS		43.8514	-70.3847	0.01				AAS	METAMORPHIC	UNKNOWN	UNKNOWN	MARBLE																													2.6
C153989		USGS		Geochemistry of rock samples from the National Geochemical Database: U.S. Geological Survey, Reston, VA.	U.S. Geological Survey	USGS		43.8514	-70.3847	0.01				ICPAES	METAMORPHIC	UNKNOWN	UNKNOWN	MARBLE																					36.6	3.92	884	61	16	21		62			7.73
C221126		USGS		Geochemistry of rock samples from the National Geochemical Database: U.S. Geological Survey, Reston, VA.	U.S. Geological Survey	USGS		27.6385	85.0998	0.01				ICPAES	METAMORPHIC	UNKNOWN	UNKNOWN	MARBLE																						0.66	578	3.4	1.2	1.4		7.2			1.4
C221126		USGS		Geochemistry of rock samples from the National Geochemical Database: U.S. Geological Survey, Reston, VA.	U.S. Geological Survey	USGS		27.6385	85.0998	0.01				XRF	METAMORPHIC	UNKNOWN	UNKNOWN	MARBLE																								9		5		9	2
CAA034		USGS		Geochemistry of rock samples from the National Geochemical Database: U.S. Geological Survey, Reston, VA.	U.S. Geological Survey	USGS		64.4017	-145.563	0.01				ES	METAMORPHIC	UNKNOWN	UNKNOWN	MARBLE																						0.7	2000
CAA686		USGS		Geochemistry of rock samples from the National Geochemical Database: U.S. Geological Survey, Reston, VA.	U.S. Geological Survey	USGS		65.4361	-150.108	0.01				AAS	METAMORPHIC	UNKNOWN	UNKNOWN	MARBLE
CAA686		USGS		Geochemistry of rock samples from the National Geochemical Database: U.S. Geological Survey, Reston, VA.	U.S. Geological Survey	USGS		65.4361	-150.108	0.01				ES	METAMORPHIC	UNKNOWN	UNKNOWN	MARBLE																						0.2	100
CAA877		USGS		Geochemistry of rock samples from the National Geochemical Database: U.S. Geological Survey, Reston, VA.	U.S. Geological Survey	USGS		65.1567	-154.46	0.01				AAS	METAMORPHIC	UNKNOWN	UNKNOWN	MARBLE
CAA877		USGS		Geochemistry of rock samples from the National Geochemical Database: U.S. Geological Survey, Reston, VA.	U.S. Geological Survey	USGS		65.1567	-154.46	0.01				ES	METAMORPHIC	UNKNOWN	UNKNOWN	MARBLE																					1.5	0.5	500	5	1.5	10
CAB078		USGS		Geochemistry of rock samples from the National Geochemical Database: U.S. Geological Survey, Reston, VA.	U.S. Geological Survey	USGS		62.368	-149.214	0.01				ES	METAMORPHIC	UNKNOWN	UNKNOWN	MARBLE																						0.1	3000	5	7	5				0.7
CAB091		USGS		Geochemistry of rock samples from the National Geochemical Database: U.S. Geological Survey, Reston, VA.	U.S. Geological Survey	USGS		62.3553	-149.004	0.01				ES	METAMORPHIC	UNKNOWN	UNKNOWN	MARBLE																						0.1	200			1
CAB500		USGS		Geochemistry of rock samples from the National Geochemical Database: U.S. Geological Survey, Reston, VA.	U.S. Geological Survey	USGS		65.0983	-154.588	0.01				AAS	METAMORPHIC	UNKNOWN	UNKNOWN	MARBLE
CAB500		USGS		Geochemistry of rock samples from the National Geochemical Database: U.S. Geological Survey, Reston, VA.	U.S. Geological Survey	USGS		65.0983	-154.588	0.01				ES	METAMORPHIC	UNKNOWN	UNKNOWN	MARBLE																					0.07	0.07	70			1.5
CAB673		USGS		Geochemistry of rock samples from the National Geochemical Database: U.S. Geological Survey, Reston, VA.	U.S. Geological Survey	USGS		64.425	-144.492	0.01				ES	METAMORPHIC	UNKNOWN	UNKNOWN	MARBLE																						0.7	300	7		3
CAB735		USGS		Geochemistry of rock samples from the National Geochemical Database: U.S. Geological Survey, Reston, VA.	U.S. Geological Survey	USGS		63.9528	-141.287	0.01				ES	METAMORPHIC	UNKNOWN	UNKNOWN	MARBLE																						0.1	700
CAB939		USGS		Geochemistry of rock samples from the National Geochemical Database: U.S. Geological Survey, Reston, VA.	U.S. Geological Survey	USGS		63.9528	-141.287	0.01				ES	METAMORPHIC	UNKNOWN	UNKNOWN	MARBLE																						2	700	20	15
CAB976		USGS		Geochemistry of rock samples from the National Geochemical Database: U.S. Geological Survey, Reston, VA.	U.S. Geological Survey	USGS		63.7694	-141.6	0.01				ES	METAMORPHIC	UNKNOWN	UNKNOWN	MARBLE																						0.5	700
CAK034		USGS		Geochemistry of rock samples from the National Geochemical Database: U.S. Geological Survey, Reston, VA.	U.S. Geological Survey	USGS		61.0644	-142.097	0.01				ES	METAMORPHIC	UNKNOWN	UNKNOWN	MARBLE																						10	700	50	30	500				1
CAK044		USGS		Geochemistry of rock samples from the National Geochemical Database: U.S. Geological Survey, Reston, VA.	U.S. Geological Survey	USGS		61.0836	-142.178	0.01				ES	METAMORPHIC	UNKNOWN	UNKNOWN	MARBLE																						3	200	20	5	20				1
CAK045		USGS		Geochemistry of rock samples from the National Geochemical Database: U.S. Geological Survey, Reston, VA.	U.S. Geological Survey	USGS		61.1058	-142.109	0.01				ES	METAMORPHIC	UNKNOWN	UNKNOWN	MARBLE																						3	700	30	15	50
CAP052		USGS		Geochemistry of rock samples from the National Geochemical Database: U.S. Geological Survey, Reston, VA.	U.S. Geological Survey	USGS		63.2433	-143.768	0.01				ES	METAMORPHIC	UNKNOWN	UNKNOWN	MARBLE																						1	300
CAP557		USGS		Geochemistry of rock samples from the National Geochemical Database: U.S. Geological Survey, Reston, VA.	U.S. Geological Survey	USGS		63.0153	-143.944	0.01				AAS	METAMORPHIC	UNKNOWN	UNKNOWN	MARBLE																												40
CAP557		USGS		Geochemistry of rock samples from the National Geochemical Database: U.S. Geological Survey, Reston, VA.	U.S. Geological Survey	USGS		63.0153	-143.944	0.01				ES	METAMORPHIC	UNKNOWN	UNKNOWN	MARBLE																						2	200	15
CAP560		USGS		Geochemistry of rock samples from the National Geochemical Database: U.S. Geological Survey, Reston, VA.	U.S. Geological Survey	USGS		63.0153	-143.944	0.01				AAS	METAMORPHIC	UNKNOWN	UNKNOWN	MARBLE																										85		80
CAP560		USGS		Geochemistry of rock samples from the National Geochemical Database: U.S. Geological Survey, Reston, VA.	U.S. Geological Survey	USGS		63.0153	-143.944	0.01				COL	METAMORPHIC	UNKNOWN	UNKNOWN	MARBLE																													120
CAP560		USGS		Geochemistry of rock samples from the National Geochemical Database: U.S. Geological Survey, Reston, VA.	U.S. Geological Survey	USGS		63.0153	-143.944	0.01				ES	METAMORPHIC	UNKNOWN	UNKNOWN	MARBLE																						3	700	50	15	70
CAP562		USGS		Geochemistry of rock samples from the National Geochemical Database: U.S. Geological Survey, Reston, VA.	U.S. Geological Survey	USGS		63.0153	-143.939	0.01				ES	METAMORPHIC	UNKNOWN	UNKNOWN	MARBLE																						1	1500	15		15				0.5
CAP583		USGS		Geochemistry of rock samples from the National Geochemical Database: U.S. Geological Survey, Reston, VA.	U.S. Geological Survey	USGS		63.2903	-143.908	0.01				ES	METAMORPHIC	UNKNOWN	UNKNOWN	MARBLE																						2	300	10
CAP589		USGS		Geochemistry of rock samples from the National Geochemical Database: U.S. Geological Survey, Reston, VA.	U.S. Geological Survey	USGS		63.2955	-143.932	0.01				ES	METAMORPHIC	UNKNOWN	UNKNOWN	MARBLE																						1	700	10	5
CAP593		USGS		Geochemistry of rock samples from the National Geochemical Database: U.S. Geological Survey, Reston, VA.	U.S. Geological Survey	USGS		63.3006	-143.952	0.01				AAS	METAMORPHIC	UNKNOWN	UNKNOWN	MARBLE																										20		90
CAP593		USGS		Geochemistry of rock samples from the National Geochemical Database: U.S. Geological Survey, Reston, VA.	U.S. Geological Survey	USGS		63.3006	-143.952	0.01				ES	METAMORPHIC	UNKNOWN	UNKNOWN	MARBLE																						10	1000	30	30	50
CAP597		USGS		Geochemistry of rock samples from the National Geochemical Database: U.S. Geological Survey, Reston, VA.	U.S. Geological Survey	USGS		63.2894	-143.977	0.01				ES	METAMORPHIC	UNKNOWN	UNKNOWN	MARBLE																						2	700	10	5	5				0.7
CAP599		USGS		Geochemistry of rock samples from the National Geochemical Database: U.S. Geological Survey, Reston, VA.	U.S. Geological Survey	USGS		63.0086	-143.875	0.01				AAS	METAMORPHIC	UNKNOWN	UNKNOWN	MARBLE																										140		70
CAP599		USGS		Geochemistry of rock samples from the National Geochemical Database: U.S. Geological Survey, Reston, VA.	U.S. Geological Survey	USGS		63.0086	-143.875	0.01				ES	METAMORPHIC	UNKNOWN	UNKNOWN	MARBLE																						7	1000	70	50	150
CAP600		USGS		Geochemistry of rock samples from the National Geochemical Database: U.S. Geological Survey, Reston, VA.	U.S. Geological Survey	USGS		63.0092	-143.88	0.01				AAS	METAMORPHIC	UNKNOWN	UNKNOWN	MARBLE																										20		10
CAP600		USGS		Geochemistry of rock samples from the National Geochemical Database: U.S. Geological Survey, Reston, VA.	U.S. Geological Survey	USGS		63.0092	-143.88	0.01				COL	METAMORPHIC	UNKNOWN	UNKNOWN	MARBLE																													60
CAP600		USGS		Geochemistry of rock samples from the National Geochemical Database: U.S. Geological Survey, Reston, VA.	U.S. Geological Survey	USGS		63.0092	-143.88	0.01				ES	METAMORPHIC	UNKNOWN	UNKNOWN	MARBLE																						5	1000	10		20
CAP626		USGS		Geochemistry of rock samples from the National Geochemical Database: U.S. Geological Survey, Reston, VA.	U.S. Geological Survey	USGS		63.2703	-143.959	0.01				AAS	METAMORPHIC	UNKNOWN	UNKNOWN	MARBLE																										20		15
CAP626		USGS		Geochemistry of rock samples from the National Geochemical Database: U.S. Geological Survey, Reston, VA.	U.S. Geological Survey	USGS		63.2703	-143.959	0.01				COL	METAMORPHIC	UNKNOWN	UNKNOWN	MARBLE																													80
CAP626		USGS		Geochemistry of rock samples from the National Geochemical Database: U.S. Geological Survey, Reston, VA.	U.S. Geological Survey	USGS		63.2703	-143.959	0.01				ES	METAMORPHIC	UNKNOWN	UNKNOWN	MARBLE																						1	1000			5
CAQ085		USGS		Geochemistry of rock samples from the National Geochemical Database: U.S. Geological Survey, Reston, VA.	U.S. Geological Survey	USGS		63.4775	-142.894	0.01				AAS	METAMORPHIC	UNKNOWN	UNKNOWN	MARBLE																												45
CAQ085		USGS		Geochemistry of rock samples from the National Geochemical Database: U.S. Geological Survey, Reston, VA.	U.S. Geological Survey	USGS		63.4775	-142.894	0.01				ES	METAMORPHIC	UNKNOWN	UNKNOWN	MARBLE																						3	1000	1000	70	20
CAQ098		USGS		Geochemistry of rock samples from the National Geochemical Database: U.S. Geological Survey, Reston, VA.	U.S. Geological Survey	USGS		63.9781	-141.078	0.01				AAS	METAMORPHIC	UNKNOWN	UNKNOWN	MARBLE																												20
CAQ098		USGS		Geochemistry of rock samples from the National Geochemical Database: U.S. Geological Survey, Reston, VA.	U.S. Geological Survey	USGS		63.9781	-141.078	0.01				ES	METAMORPHIC	UNKNOWN	UNKNOWN	MARBLE																						0.2	100
CAS145		USGS		Geochemistry of rock samples from the National Geochemical Database: U.S. Geological Survey, Reston, VA.	U.S. Geological Survey	USGS		55.4089	-131.484	0.01				AAS	METAMORPHIC	UNKNOWN	UNKNOWN	MARBLE																												25
CAS145		USGS		Geochemistry of rock samples from the National Geochemical Database: U.S. Geological Survey, Reston, VA.	U.S. Geological Survey	USGS		55.4089	-131.484	0.01				ES	METAMORPHIC	UNKNOWN	UNKNOWN	MARBLE																								30	5			200
CAS186		USGS		Geochemistry of rock samples from the National Geochemical Database: U.S. Geological Survey, Reston, VA.	U.S. Geological Survey	USGS		55.3505	-131.383	0.01				AAS	METAMORPHIC	UNKNOWN	UNKNOWN	MARBLE																												15
CAS186		USGS		Geochemistry of rock samples from the National Geochemical Database: U.S. Geological Survey, Reston, VA.	U.S. Geological Survey	USGS		55.3505	-131.383	0.01				ES	METAMORPHIC	UNKNOWN	UNKNOWN	MARBLE																								5
CAS203		USGS		Geochemistry of rock samples from the National Geochemical Database: U.S. Geological Survey, Reston, VA.	U.S. Geological Survey	USGS		55.3961	-131.367	0.01				AAS	METAMORPHIC	UNKNOWN	UNKNOWN	MARBLE																												10
CAS203		USGS		Geochemistry of rock samples from the National Geochemical Database: U.S. Geological Survey, Reston, VA.	U.S. Geological Survey	USGS		55.3961	-131.367	0.01				ES	METAMORPHIC	UNKNOWN	UNKNOWN	MARBLE																								30	20	50
CAS235		USGS		Geochemistry of rock samples from the National Geochemical Database: U.S. Geological Survey, Reston, VA.	U.S. Geological Survey	USGS		55.4522	-131.317	0.01				AAS	METAMORPHIC	UNKNOWN	UNKNOWN	MARBLE																												60
CAS235		USGS		Geochemistry of rock samples from the National Geochemical Database: U.S. Geological Survey, Reston, VA.	U.S. Geological Survey	USGS		55.4522	-131.317	0.01				ES	METAMORPHIC	UNKNOWN	UNKNOWN	MARBLE																										30
CAS241		USGS		Geochemistry of rock samples from the National Geochemical Database: U.S. Geological Survey, Reston, VA.	U.S. Geological Survey	USGS		55.5653	-131.335	0.01				AAS	METAMORPHIC	UNKNOWN	UNKNOWN	MARBLE																												50
CAS241		USGS		Geochemistry of rock samples from the National Geochemical Database: U.S. Geological Survey, Reston, VA.	U.S. Geological Survey	USGS		55.5653	-131.335	0.01				ES	METAMORPHIC	UNKNOWN	UNKNOWN	MARBLE																								50		7
CAV389		USGS		Geochemistry of rock samples from the National Geochemical Database: U.S. Geological Survey, Reston, VA.	U.S. Geological Survey	USGS		62.2	-142.85	0.01				AAS	METAMORPHIC	UNKNOWN	UNKNOWN	MARBLE																										10000		1400
CAV389		USGS		Geochemistry of rock samples from the National Geochemical Database: U.S. Geological Survey, Reston, VA.	U.S. Geological Survey	USGS		62.2	-142.85	0.01				ES	METAMORPHIC	UNKNOWN	UNKNOWN	MARBLE																						15	3000	5		15000		300		5
CAV453		USGS		Geochemistry of rock samples from the National Geochemical Database: U.S. Geological Survey, Reston, VA.	U.S. Geological Survey	USGS		62.2	-142.7	0.01				ES	METAMORPHIC	UNKNOWN	UNKNOWN	MARBLE																							1500	20	70	700
CAW272		USGS		Geochemistry of rock samples from the National Geochemical Database: U.S. Geological Survey, Reston, VA.	U.S. Geological Survey	USGS		64.4022	-144.426	0.01				ES	METAMORPHIC	UNKNOWN	UNKNOWN	MARBLE																						3	500	30	10	150
CAW273		USGS		Geochemistry of rock samples from the National Geochemical Database: U.S. Geological Survey, Reston, VA.	U.S. Geological Survey	USGS		64.4022	-144.426	0.01				ES	METAMORPHIC	UNKNOWN	UNKNOWN	MARBLE																						2	500	15	7	10
CAW331		USGS		Geochemistry of rock samples from the National Geochemical Database: U.S. Geological Survey, Reston, VA.	U.S. Geological Survey	USGS		64.2047	-144.16	0.01				ES	METAMORPHIC	UNKNOWN	UNKNOWN	MARBLE																						0.5	150	7		5
CBH013		USGS		Geochemistry of rock samples from the National Geochemical Database: U.S. Geological Survey, Reston, VA.	U.S. Geological Survey	USGS		64.3489	-144.938	0.01				ES	METAMORPHIC	UNKNOWN	UNKNOWN	MARBLE																						1.5	1000	5		5
CBH049		USGS		Geochemistry of rock samples from the National Geochemical Database: U.S. Geological Survey, Reston, VA.	U.S. Geological Survey	USGS		64.6786	-144.164	0.01				AAS	METAMORPHIC	UNKNOWN	UNKNOWN	MARBLE
CBH049		USGS		Geochemistry of rock samples from the National Geochemical Database: U.S. Geological Survey, Reston, VA.	U.S. Geological Survey	USGS		64.6786	-144.164	0.01				ES	METAMORPHIC	UNKNOWN	UNKNOWN	MARBLE																								10		1500				7
CBH073		USGS		Geochemistry of rock samples from the National Geochemical Database: U.S. Geological Survey, Reston, VA.	U.S. Geological Survey	USGS		64.5756	-144.38	0.01				ES	METAMORPHIC	UNKNOWN	UNKNOWN	MARBLE																								70	30	30
CBH077		USGS		Geochemistry of rock samples from the National Geochemical Database: U.S. Geological Survey, Reston, VA.	U.S. Geological Survey	USGS		64.6786	-144.164	0.01				ES	METAMORPHIC	UNKNOWN	UNKNOWN	MARBLE																								1500	50	10
CBH104		USGS		Geochemistry of rock samples from the National Geochemical Database: U.S. Geological Survey, Reston, VA.	U.S. Geological Survey	USGS		64.7925	-144.234	0.01				ES	METAMORPHIC	UNKNOWN	UNKNOWN	MARBLE																								5	10
CBH108		USGS		Geochemistry of rock samples from the National Geochemical Database: U.S. Geological Survey, Reston, VA.	U.S. Geological Survey	USGS		64.9553	-144.423	0.01				ES	METAMORPHIC	UNKNOWN	UNKNOWN	MARBLE																								15	15	700				1
CBH375		USGS		Geochemistry of rock samples from the National Geochemical Database: U.S. Geological Survey, Reston, VA.	U.S. Geological Survey	USGS		64.7992	-144.239	0.01				ES	METAMORPHIC	UNKNOWN	UNKNOWN	MARBLE																						1	500
CBH650		USGS		Geochemistry of rock samples from the National Geochemical Database: U.S. Geological Survey, Reston, VA.	U.S. Geological Survey	USGS		64.7253	-144.122	0.01				ES	METAMORPHIC	UNKNOWN	UNKNOWN	MARBLE																						3	1000	20	5	30		500		10
CBH653		USGS		Geochemistry of rock samples from the National Geochemical Database: U.S. Geological Survey, Reston, VA.	U.S. Geological Survey	USGS		64.9069	-144.853	0.01				ES	METAMORPHIC	UNKNOWN	UNKNOWN	MARBLE																						3	700	20	7	5		200
CBH741		USGS		Geochemistry of rock samples from the National Geochemical Database: U.S. Geological Survey, Reston, VA.	U.S. Geological Survey	USGS		64.6111	-144.074	0.01				ES	METAMORPHIC	UNKNOWN	UNKNOWN	MARBLE																						7	1500	70	50	70
CBH751		USGS		Geochemistry of rock samples from the National Geochemical Database: U.S. Geological Survey, Reston, VA.	U.S. Geological Survey	USGS		64.5358	-145.405	0.01				ES	METAMORPHIC	UNKNOWN	UNKNOWN	MARBLE																						1	150	50	10
CBJ372		USGS		Geochemistry of rock samples from the National Geochemical Database: U.S. Geological Survey, Reston, VA.	U.S. Geological Survey	USGS		55.2322	-131.129	0.01				AAS	METAMORPHIC	UNKNOWN	UNKNOWN	MARBLE																												15
CBJ372		USGS		Geochemistry of rock samples from the National Geochemical Database: U.S. Geological Survey, Reston, VA.	U.S. Geological Survey	USGS		55.2322	-131.129	0.01				ES	METAMORPHIC	UNKNOWN	UNKNOWN	MARBLE																										20
CBJ392		USGS		Geochemistry of rock samples from the National Geochemical Database: U.S. Geological Survey, Reston, VA.	U.S. Geological Survey	USGS		55.2822	-131.246	0.01				AAS	METAMORPHIC	UNKNOWN	UNKNOWN	MARBLE																												20
CBJ392		USGS		Geochemistry of rock samples from the National Geochemical Database: U.S. Geological Survey, Reston, VA.	U.S. Geological Survey	USGS		55.2822	-131.246	0.01				ES	METAMORPHIC	UNKNOWN	UNKNOWN	MARBLE																								70	15	15
CBJ406		USGS		Geochemistry of rock samples from the National Geochemical Database: U.S. Geological Survey, Reston, VA.	U.S. Geological Survey	USGS		55.2044	-131.248	0.01				AAS	METAMORPHIC	UNKNOWN	UNKNOWN	MARBLE																												30
CBJ406		USGS		Geochemistry of rock samples from the National Geochemical Database: U.S. Geological Survey, Reston, VA.	U.S. Geological Survey	USGS		55.2044	-131.248	0.01				ES	METAMORPHIC	UNKNOWN	UNKNOWN	MARBLE																								30	15	10
CBJ413		USGS		Geochemistry of rock samples from the National Geochemical Database: U.S. Geological Survey, Reston, VA.	U.S. Geological Survey	USGS		55.3003	-131.227	0.01				AAS	METAMORPHIC	UNKNOWN	UNKNOWN	MARBLE																												140
CBJ413		USGS		Geochemistry of rock samples from the National Geochemical Database: U.S. Geological Survey, Reston, VA.	U.S. Geological Survey	USGS		55.3003	-131.227	0.01				ES	METAMORPHIC	UNKNOWN	UNKNOWN	MARBLE																								30		15
CBJ415		USGS		Geochemistry of rock samples from the National Geochemical Database: U.S. Geological Survey, Reston, VA.	U.S. Geological Survey	USGS		55.3205	-131.222	0.01				AAS	METAMORPHIC	UNKNOWN	UNKNOWN	MARBLE																												20
CBJ415		USGS		Geochemistry of rock samples from the National Geochemical Database: U.S. Geological Survey, Reston, VA.	U.S. Geological Survey	USGS		55.3205	-131.222	0.01				ES	METAMORPHIC	UNKNOWN	UNKNOWN	MARBLE																										30
CBJ429		USGS		Geochemistry of rock samples from the National Geochemical Database: U.S. Geological Survey, Reston, VA.	U.S. Geological Survey	USGS		55.2325	-131.108	0.01				AAS	METAMORPHIC	UNKNOWN	UNKNOWN	MARBLE																												120
CBJ429		USGS		Geochemistry of rock samples from the National Geochemical Database: U.S. Geological Survey, Reston, VA.	U.S. Geological Survey	USGS		55.2325	-131.108	0.01				ES	METAMORPHIC	UNKNOWN	UNKNOWN	MARBLE																								70	15	50				1
CBJ462		USGS		Geochemistry of rock samples from the National Geochemical Database: U.S. Geological Survey, Reston, VA.	U.S. Geological Survey	USGS		64.7728	-144.469	0.01				AAS	METAMORPHIC	UNKNOWN	UNKNOWN	MARBLE
CBJ462		USGS		Geochemistry of rock samples from the National Geochemical Database: U.S. Geological Survey, Reston, VA.	U.S. Geological Survey	USGS		64.7728	-144.469	0.01				ES	METAMORPHIC	UNKNOWN	UNKNOWN	MARBLE																								5
CBJ544		USGS		Geochemistry of rock samples from the National Geochemical Database: U.S. Geological Survey, Reston, VA.	U.S. Geological Survey	USGS		64.8564	-144.036	0.01				ES	METAMORPHIC	UNKNOWN	UNKNOWN	MARBLE																						0.5	150	7
CBJ561		USGS		Geochemistry of rock samples from the National Geochemical Database: U.S. Geological Survey, Reston, VA.	U.S. Geological Survey	USGS		64.7975	-144.237	0.01				ES	METAMORPHIC	UNKNOWN	UNKNOWN	MARBLE																						0.5	70	5
CBJ572		USGS		Geochemistry of rock samples from the National Geochemical Database: U.S. Geological Survey, Reston, VA.	U.S. Geological Survey	USGS		64.7225	-144.116	0.01				ES	METAMORPHIC	UNKNOWN	UNKNOWN	MARBLE
CBJ573		USGS		Geochemistry of rock samples from the National Geochemical Database: U.S. Geological Survey, Reston, VA.	U.S. Geological Survey	USGS		64.7214	-144.116	0.01				ES	METAMORPHIC	UNKNOWN	UNKNOWN	MARBLE																								10
CBJ581		USGS		Geochemistry of rock samples from the National Geochemical Database: U.S. Geological Survey, Reston, VA.	U.S. Geological Survey	USGS		64.8597	-144.074	0.01				ES	METAMORPHIC	UNKNOWN	UNKNOWN	MARBLE																								5
CBJ582		USGS		Geochemistry of rock samples from the National Geochemical Database: U.S. Geological Survey, Reston, VA.	U.S. Geological Survey	USGS		64.9881	-144.661	0.01				ES	METAMORPHIC	UNKNOWN	UNKNOWN	MARBLE																								50	15
CBJ621		USGS		Geochemistry of rock samples from the National Geochemical Database: U.S. Geological Survey, Reston, VA.	U.S. Geological Survey	USGS		64.7253	-144.122	0.01				ES	METAMORPHIC	UNKNOWN	UNKNOWN	MARBLE																								10
CBJ632		USGS		Geochemistry of rock samples from the National Geochemical Database: U.S. Geological Survey, Reston, VA.	U.S. Geological Survey	USGS		64.8947	-144.818	0.01				ES	METAMORPHIC	UNKNOWN	UNKNOWN	MARBLE																								5
CBJ914		USGS		Geochemistry of rock samples from the National Geochemical Database: U.S. Geological Survey, Reston, VA.	U.S. Geological Survey	USGS		64.8292	-144.667	0.01				ES	METAMORPHIC	UNKNOWN	UNKNOWN	MARBLE																								70	30	100
CBJ951		USGS		Geochemistry of rock samples from the National Geochemical Database: U.S. Geological Survey, Reston, VA.	U.S. Geological Survey	USGS		64.7225	-144.116	0.01				ES	METAMORPHIC	UNKNOWN	UNKNOWN	MARBLE																						1.5	700	10	15
CBJ995		USGS		Geochemistry of rock samples from the National Geochemical Database: U.S. Geological Survey, Reston, VA.	U.S. Geological Survey	USGS		64.9069	-144.853	0.01				ES	METAMORPHIC	UNKNOWN	UNKNOWN	MARBLE																						2	700	20	10			300
CBT323		USGS		Geochemistry of rock samples from the National Geochemical Database: U.S. Geological Survey, Reston, VA.	U.S. Geological Survey	USGS		67.8064	-156.766	0.01				AAS	METAMORPHIC	UNKNOWN	UNKNOWN	MARBLE																										5500		30
CBT323		USGS		Geochemistry of rock samples from the National Geochemical Database: U.S. Geological Survey, Reston, VA.	U.S. Geological Survey	USGS		67.8064	-156.766	0.01				ES	METAMORPHIC	UNKNOWN	UNKNOWN	MARBLE																						10	700	100	50	5000
CBT325		USGS		Geochemistry of rock samples from the National Geochemical Database: U.S. Geological Survey, Reston, VA.	U.S. Geological Survey	USGS		67.9211	-158.867	0.01				AAS	METAMORPHIC	UNKNOWN	UNKNOWN	MARBLE																										5		20
CBT325		USGS		Geochemistry of rock samples from the National Geochemical Database: U.S. Geological Survey, Reston, VA.	U.S. Geological Survey	USGS		67.9211	-158.867	0.01				ES	METAMORPHIC	UNKNOWN	UNKNOWN	MARBLE																						10	2000			15
CBT327		USGS		Geochemistry of rock samples from the National Geochemical Database: U.S. Geological Survey, Reston, VA.	U.S. Geological Survey	USGS		67.6328	-157.031	0.01				AAS	METAMORPHIC	UNKNOWN	UNKNOWN	MARBLE																										1800		45
CBT327		USGS		Geochemistry of rock samples from the National Geochemical Database: U.S. Geological Survey, Reston, VA.	U.S. Geological Survey	USGS		67.6328	-157.031	0.01				ES	METAMORPHIC	UNKNOWN	UNKNOWN	MARBLE																						10	2000	150	100	1000
CBV022		USGS		Geochemistry of rock samples from the National Geochemical Database: U.S. Geological Survey, Reston, VA.	U.S. Geological Survey	USGS		64.5394	-145.622	0.01				ES	METAMORPHIC	UNKNOWN	UNKNOWN	MARBLE																								20	15	20
CBV195		USGS		Geochemistry of rock samples from the National Geochemical Database: U.S. Geological Survey, Reston, VA.	U.S. Geological Survey	USGS		64.5972	-145.636	0.01				ES	METAMORPHIC	UNKNOWN	UNKNOWN	MARBLE																						3	500	30	20	7
CBV242		USGS		Geochemistry of rock samples from the National Geochemical Database: U.S. Geological Survey, Reston, VA.	U.S. Geological Survey	USGS		64.4875	-145.5	0.01				ES	METAMORPHIC	UNKNOWN	UNKNOWN	MARBLE																						5	500	150	70
CBV323		USGS		Geochemistry of rock samples from the National Geochemical Database: U.S. Geological Survey, Reston, VA.	U.S. Geological Survey	USGS		64.8875	-145.342	0.01				ES	METAMORPHIC	UNKNOWN	UNKNOWN	MARBLE																						0.2	50							3
CBV341		USGS		Geochemistry of rock samples from the National Geochemical Database: U.S. Geological Survey, Reston, VA.	U.S. Geological Survey	USGS		64.9597	-144.422	0.01				ES	METAMORPHIC	UNKNOWN	UNKNOWN	MARBLE																						5	5000	10	10		100	2000
CBV342		USGS		Geochemistry of rock samples from the National Geochemical Database: U.S. Geological Survey, Reston, VA.	U.S. Geological Survey	USGS		64.9597	-144.422	0.01				ES	METAMORPHIC	UNKNOWN	UNKNOWN	MARBLE																						7	1000	5	20	1000	100	7000		7
CBV374		USGS		Geochemistry of rock samples from the National Geochemical Database: U.S. Geological Survey, Reston, VA.	U.S. Geological Survey	USGS		64.6153	-144.117	0.01				ES	METAMORPHIC	UNKNOWN	UNKNOWN	MARBLE																						0.3	100
CBV375		USGS		Geochemistry of rock samples from the National Geochemical Database: U.S. Geological Survey, Reston, VA.	U.S. Geological Survey	USGS		64.625	-144.119	0.01				ES	METAMORPHIC	UNKNOWN	UNKNOWN	MARBLE																						0.2	50
CBY987		USGS		Geochemistry of rock samples from the National Geochemical Database: U.S. Geological Survey, Reston, VA.	U.S. Geological Survey	USGS		67.6697	-157.013	0.01				AAS	METAMORPHIC	UNKNOWN	UNKNOWN	MARBLE																										10		10
CBY987		USGS		Geochemistry of rock samples from the National Geochemical Database: U.S. Geological Survey, Reston, VA.	U.S. Geological Survey	USGS		67.6697	-157.013	0.01				ES	METAMORPHIC	UNKNOWN	UNKNOWN	MARBLE																						15	700
CBY988		USGS		Geochemistry of rock samples from the National Geochemical Database: U.S. Geological Survey, Reston, VA.	U.S. Geological Survey	USGS		67.6867	-158.889	0.01				AAS	METAMORPHIC	UNKNOWN	UNKNOWN	MARBLE																										18000		15
CBY988		USGS		Geochemistry of rock samples from the National Geochemical Database: U.S. Geological Survey, Reston, VA.	U.S. Geological Survey	USGS		67.6867	-158.889	0.01				ES	METAMORPHIC	UNKNOWN	UNKNOWN	MARBLE																						15	50							10
CBY990		USGS		Geochemistry of rock samples from the National Geochemical Database: U.S. Geological Survey, Reston, VA.	U.S. Geological Survey	USGS		67.4278	-153.938	0.01				AAS	METAMORPHIC	UNKNOWN	UNKNOWN	MARBLE																										2800		55
CBY990		USGS		Geochemistry of rock samples from the National Geochemical Database: U.S. Geological Survey, Reston, VA.	U.S. Geological Survey	USGS		67.4278	-153.938	0.01				ES	METAMORPHIC	UNKNOWN	UNKNOWN	MARBLE																							1000	100	70	5000
CBY994		USGS		Geochemistry of rock samples from the National Geochemical Database: U.S. Geological Survey, Reston, VA.	U.S. Geological Survey	USGS		67.5792	-156.945	0.01				AAS	METAMORPHIC	UNKNOWN	UNKNOWN	MARBLE																										15		10
CBY994		USGS		Geochemistry of rock samples from the National Geochemical Database: U.S. Geological Survey, Reston, VA.	U.S. Geological Survey	USGS		67.5792	-156.945	0.01				ES	METAMORPHIC	UNKNOWN	UNKNOWN	MARBLE																						2	5000	50		10
CBY995		USGS		Geochemistry of rock samples from the National Geochemical Database: U.S. Geological Survey, Reston, VA.	U.S. Geological Survey	USGS		67.5847	-156.919	0.01				AAS	METAMORPHIC	UNKNOWN	UNKNOWN	MARBLE																										10		5
CBY995		USGS		Geochemistry of rock samples from the National Geochemical Database: U.S. Geological Survey, Reston, VA.	U.S. Geological Survey	USGS		67.5847	-156.919	0.01				ES	METAMORPHIC	UNKNOWN	UNKNOWN	MARBLE																						2	2000			20
CCG635		USGS		Geochemistry of rock samples from the National Geochemical Database: U.S. Geological Survey, Reston, VA.	U.S. Geological Survey	USGS		65.0011	-144.944	0.01				ES	METAMORPHIC	UNKNOWN	UNKNOWN	MARBLE																						5	300	30	10	20
CCG646		USGS		Geochemistry of rock samples from the National Geochemical Database: U.S. Geological Survey, Reston, VA.	U.S. Geological Survey	USGS		65.0306	-145.08	0.01				ES	METAMORPHIC	UNKNOWN	UNKNOWN	MARBLE																						2	200	50		20
CCG650		USGS		Geochemistry of rock samples from the National Geochemical Database: U.S. Geological Survey, Reston, VA.	U.S. Geological Survey	USGS		65.1117	-144.019	0.01				ES	METAMORPHIC	UNKNOWN	UNKNOWN	MARBLE																						7	500	50	20	20
CCG653		USGS		Geochemistry of rock samples from the National Geochemical Database: U.S. Geological Survey, Reston, VA.	U.S. Geological Survey	USGS		65.1139	-144.097	0.01				ES	METAMORPHIC	UNKNOWN	UNKNOWN	MARBLE																						5	700	15
CCG654		USGS		Geochemistry of rock samples from the National Geochemical Database: U.S. Geological Survey, Reston, VA.	U.S. Geological Survey	USGS		65.1139	-144.097	0.01				ES	METAMORPHIC	UNKNOWN	UNKNOWN	MARBLE																						10	1000	200	50	10		200
CCG702		USGS		Geochemistry of rock samples from the National Geochemical Database: U.S. Geological Survey, Reston, VA.	U.S. Geological Survey	USGS		65.0705	-144.703	0.01				ES	METAMORPHIC	UNKNOWN	UNKNOWN	MARBLE																						7	700	100	20
CCG737		USGS		Geochemistry of rock samples from the National Geochemical Database: U.S. Geological Survey, Reston, VA.	U.S. Geological Survey	USGS		65.1783	-144.506	0.01				ES	METAMORPHIC	UNKNOWN	UNKNOWN	MARBLE																						2	700
CCG739		USGS		Geochemistry of rock samples from the National Geochemical Database: U.S. Geological Survey, Reston, VA.	U.S. Geological Survey	USGS		65.1817	-144.497	0.01				ES	METAMORPHIC	UNKNOWN	UNKNOWN	MARBLE																						7	500	30	20	20
CCG789		USGS		Geochemistry of rock samples from the National Geochemical Database: U.S. Geological Survey, Reston, VA.	U.S. Geological Survey	USGS		65.1736	-144.486	0.01				ES	METAMORPHIC	UNKNOWN	UNKNOWN	MARBLE																						7	700	50	50	30
CCG800		USGS		Geochemistry of rock samples from the National Geochemical Database: U.S. Geological Survey, Reston, VA.	U.S. Geological Survey	USGS		65.1272	-144.213	0.01				ES	METAMORPHIC	UNKNOWN	UNKNOWN	MARBLE																						10	700	50	30
CCG802		USGS		Geochemistry of rock samples from the National Geochemical Database: U.S. Geological Survey, Reston, VA.	U.S. Geological Survey	USGS		65.1336	-144.222	0.01				ES	METAMORPHIC	UNKNOWN	UNKNOWN	MARBLE																						5	500	30	10
CCG828		USGS		Geochemistry of rock samples from the National Geochemical Database: U.S. Geological Survey, Reston, VA.	U.S. Geological Survey	USGS		65.0867	-144.361	0.01				ES	METAMORPHIC	UNKNOWN	UNKNOWN	MARBLE																						10	700	20	20	300		300		5
CCG837		USGS		Geochemistry of rock samples from the National Geochemical Database: U.S. Geological Survey, Reston, VA.	U.S. Geological Survey	USGS		65.0792	-146.403	0.01				ES	METAMORPHIC	UNKNOWN	UNKNOWN	MARBLE																						2	100
CCG842		USGS		Geochemistry of rock samples from the National Geochemical Database: U.S. Geological Survey, Reston, VA.	U.S. Geological Survey	USGS		65.1111	-144.593	0.01				ES	METAMORPHIC	UNKNOWN	UNKNOWN	MARBLE																						7	1000	20	20	50
CCG844		USGS		Geochemistry of rock samples from the National Geochemical Database: U.S. Geological Survey, Reston, VA.	U.S. Geological Survey	USGS		65.0875	-144.496	0.01				ES	METAMORPHIC	UNKNOWN	UNKNOWN	MARBLE																						5	700	30	20	30
CCG863		USGS		Geochemistry of rock samples from the National Geochemical Database: U.S. Geological Survey, Reston, VA.	U.S. Geological Survey	USGS		64.8833	-145.628	0.01				ES	METAMORPHIC	UNKNOWN	UNKNOWN	MARBLE																						1.5	2000	10		15		300
CCG864		USGS		Geochemistry of rock samples from the National Geochemical Database: U.S. Geological Survey, Reston, VA.	U.S. Geological Survey	USGS		64.8833	-145.628	0.01				ES	METAMORPHIC	UNKNOWN	UNKNOWN	MARBLE																						10	2000	100	70	150		200
CCG865		USGS		Geochemistry of rock samples from the National Geochemical Database: U.S. Geological Survey, Reston, VA.	U.S. Geological Survey	USGS		64.8805	-146.96	0.01				ES	METAMORPHIC	UNKNOWN	UNKNOWN	MARBLE																						2	1000			5
CCG866		USGS		Geochemistry of rock samples from the National Geochemical Database: U.S. Geological Survey, Reston, VA.	U.S. Geological Survey	USGS		64.9917	-144.267	0.01				ES	METAMORPHIC	UNKNOWN	UNKNOWN	MARBLE																						3	200	20	10
CCG867		USGS		Geochemistry of rock samples from the National Geochemical Database: U.S. Geological Survey, Reston, VA.	U.S. Geological Survey	USGS		64.9917	-144.267	0.01				ES	METAMORPHIC	UNKNOWN	UNKNOWN	MARBLE																						5	300	30	20
CCG881		USGS		Geochemistry of rock samples from the National Geochemical Database: U.S. Geological Survey, Reston, VA.	U.S. Geological Survey	USGS		65.1611	-146.368	0.01				ES	METAMORPHIC	UNKNOWN	UNKNOWN	MARBLE																						5	500	30	10
CCH526		USGS		Geochemistry of rock samples from the National Geochemical Database: U.S. Geological Survey, Reston, VA.	U.S. Geological Survey	USGS		67.6572	-155.923	0.01				AAS	METAMORPHIC	UNKNOWN	UNKNOWN	MARBLE																												5
CCH526		USGS		Geochemistry of rock samples from the National Geochemical Database: U.S. Geological Survey, Reston, VA.	U.S. Geological Survey	USGS		67.6572	-155.923	0.01				ES	METAMORPHIC	UNKNOWN	UNKNOWN	MARBLE																						1	200
CCH527		USGS		Geochemistry of rock samples from the National Geochemical Database: U.S. Geological Survey, Reston, VA.	U.S. Geological Survey	USGS		67.663	-155.936	0.01				AAS	METAMORPHIC	UNKNOWN	UNKNOWN	MARBLE																												90
CCH527		USGS		Geochemistry of rock samples from the National Geochemical Database: U.S. Geological Survey, Reston, VA.	U.S. Geological Survey	USGS		67.663	-155.936	0.01				ES	METAMORPHIC	UNKNOWN	UNKNOWN	MARBLE																						1	300
CCJ622		USGS		Geochemistry of rock samples from the National Geochemical Database: U.S. Geological Survey, Reston, VA.	U.S. Geological Survey	USGS		58.6647	-134.637	0.01				AAS	METAMORPHIC	UNKNOWN	UNKNOWN	MARBLE																												10
CCJ622		USGS		Geochemistry of rock samples from the National Geochemical Database: U.S. Geological Survey, Reston, VA.	U.S. Geological Survey	USGS		58.6647	-134.637	0.01				ES	METAMORPHIC	UNKNOWN	UNKNOWN	MARBLE																						0.1	500
CCJ623		USGS		Geochemistry of rock samples from the National Geochemical Database: U.S. Geological Survey, Reston, VA.	U.S. Geological Survey	USGS		58.6647	-134.637	0.01				AAS	METAMORPHIC	UNKNOWN	UNKNOWN	MARBLE																										5		10
CCJ623		USGS		Geochemistry of rock samples from the National Geochemical Database: U.S. Geological Survey, Reston, VA.	U.S. Geological Survey	USGS		58.6647	-134.637	0.01				ES	METAMORPHIC	UNKNOWN	UNKNOWN	MARBLE																						0.15	700
CCJ678		USGS		Geochemistry of rock samples from the National Geochemical Database: U.S. Geological Survey, Reston, VA.	U.S. Geological Survey	USGS		58.7467	-134.658	0.01				AAS	METAMORPHIC	UNKNOWN	UNKNOWN	MARBLE																												5
CCJ678		USGS		Geochemistry of rock samples from the National Geochemical Database: U.S. Geological Survey, Reston, VA.	U.S. Geological Survey	USGS		58.7467	-134.658	0.01				ES	METAMORPHIC	UNKNOWN	UNKNOWN	MARBLE																						1	700	5	5
CCJ679		USGS		Geochemistry of rock samples from the National Geochemical Database: U.S. Geological Survey, Reston, VA.	U.S. Geological Survey	USGS		58.7467	-134.658	0.01				AAS	METAMORPHIC	UNKNOWN	UNKNOWN	MARBLE																												5
CCJ679		USGS		Geochemistry of rock samples from the National Geochemical Database: U.S. Geological Survey, Reston, VA.	U.S. Geological Survey	USGS		58.7467	-134.658	0.01				ES	METAMORPHIC	UNKNOWN	UNKNOWN	MARBLE																						0.5	700			7
CCJ714		USGS		Geochemistry of rock samples from the National Geochemical Database: U.S. Geological Survey, Reston, VA.	U.S. Geological Survey	USGS		58.7436	-134.496	0.01				AAS	METAMORPHIC	UNKNOWN	UNKNOWN	MARBLE																										10		50
CCJ714		USGS		Geochemistry of rock samples from the National Geochemical Database: U.S. Geological Survey, Reston, VA.	U.S. Geological Survey	USGS		58.7436	-134.496	0.01				ES	METAMORPHIC	UNKNOWN	UNKNOWN	MARBLE																						5	1000		20	20
CCJ715		USGS		Geochemistry of rock samples from the National Geochemical Database: U.S. Geological Survey, Reston, VA.	U.S. Geological Survey	USGS		58.7436	-134.496	0.01				AAS	METAMORPHIC	UNKNOWN	UNKNOWN	MARBLE																										15		60
CCJ715		USGS		Geochemistry of rock samples from the National Geochemical Database: U.S. Geological Survey, Reston, VA.	U.S. Geological Survey	USGS		58.7436	-134.496	0.01				ES	METAMORPHIC	UNKNOWN	UNKNOWN	MARBLE																						5	1500		20	30
CCJ736		USGS		Geochemistry of rock samples from the National Geochemical Database: U.S. Geological Survey, Reston, VA.	U.S. Geological Survey	USGS		58.6939	-134.627	0.01				AAS	METAMORPHIC	UNKNOWN	UNKNOWN	MARBLE																												10
CCJ736		USGS		Geochemistry of rock samples from the National Geochemical Database: U.S. Geological Survey, Reston, VA.	U.S. Geological Survey	USGS		58.6939	-134.627	0.01				ES	METAMORPHIC	UNKNOWN	UNKNOWN	MARBLE																						0.5	500
CCJ737		USGS		Geochemistry of rock samples from the National Geochemical Database: U.S. Geological Survey, Reston, VA.	U.S. Geological Survey	USGS		58.6939	-134.627	0.01				AAS	METAMORPHIC	UNKNOWN	UNKNOWN	MARBLE																										10		5
CCJ737		USGS		Geochemistry of rock samples from the National Geochemical Database: U.S. Geological Survey, Reston, VA.	U.S. Geological Survey	USGS		58.6939	-134.627	0.01				ES	METAMORPHIC	UNKNOWN	UNKNOWN	MARBLE																						0.5	500	5		5				1
CCK867		USGS		Geochemistry of rock samples from the National Geochemical Database: U.S. Geological Survey, Reston, VA.	U.S. Geological Survey	USGS		64.6111	-144.139	0.01				ES	METAMORPHIC	UNKNOWN	UNKNOWN	MARBLE																						2	500	10	10	15
CCK905		USGS		Geochemistry of rock samples from the National Geochemical Database: U.S. Geological Survey, Reston, VA.	U.S. Geological Survey	USGS		64.5736	-144.392	0.01				ES	METAMORPHIC	UNKNOWN	UNKNOWN	MARBLE																						2	500	20	15
CCK925		USGS		Geochemistry of rock samples from the National Geochemical Database: U.S. Geological Survey, Reston, VA.	U.S. Geological Survey	USGS		64.6458	-144.728	0.01				ES	METAMORPHIC	UNKNOWN	UNKNOWN	MARBLE																						5	700	50	20
CCK952		USGS		Geochemistry of rock samples from the National Geochemical Database: U.S. Geological Survey, Reston, VA.	U.S. Geological Survey	USGS		67.4694	-154.65	0.01				AAS	METAMORPHIC	UNKNOWN	UNKNOWN	MARBLE																												20
CCK952		USGS		Geochemistry of rock samples from the National Geochemical Database: U.S. Geological Survey, Reston, VA.	U.S. Geological Survey	USGS		67.4694	-154.65	0.01				ES	METAMORPHIC	UNKNOWN	UNKNOWN	MARBLE																						0.2	50
CCK979		USGS		Geochemistry of rock samples from the National Geochemical Database: U.S. Geological Survey, Reston, VA.	U.S. Geological Survey	USGS		67.3467	-154.023	0.01				AAS	METAMORPHIC	UNKNOWN	UNKNOWN	MARBLE																												5
CCK979		USGS		Geochemistry of rock samples from the National Geochemical Database: U.S. Geological Survey, Reston, VA.	U.S. Geological Survey	USGS		67.3467	-154.023	0.01				ES	METAMORPHIC	UNKNOWN	UNKNOWN	MARBLE																						0.2	20
CCK998		USGS		Geochemistry of rock samples from the National Geochemical Database: U.S. Geological Survey, Reston, VA.	U.S. Geological Survey	USGS		67.3628	-154.558	0.01				ES	METAMORPHIC	UNKNOWN	UNKNOWN	MARBLE																						1.5	200		10	1000				2
CCM056		USGS		Geochemistry of rock samples from the National Geochemical Database: U.S. Geological Survey, Reston, VA.	U.S. Geological Survey	USGS		67.3214	-153.978	0.01				AAS	METAMORPHIC	UNKNOWN	UNKNOWN	MARBLE																												40
CCM056		USGS		Geochemistry of rock samples from the National Geochemical Database: U.S. Geological Survey, Reston, VA.	U.S. Geological Survey	USGS		67.3214	-153.978	0.01				ES	METAMORPHIC	UNKNOWN	UNKNOWN	MARBLE																						15	200	10	15	10		200
CCM058		USGS		Geochemistry of rock samples from the National Geochemical Database: U.S. Geological Survey, Reston, VA.	U.S. Geological Survey	USGS		67.4311	-154.009	0.01				AAS	METAMORPHIC	UNKNOWN	UNKNOWN	MARBLE																												85
CCM058		USGS		Geochemistry of rock samples from the National Geochemical Database: U.S. Geological Survey, Reston, VA.	U.S. Geological Survey	USGS		67.4311	-154.009	0.01				ES	METAMORPHIC	UNKNOWN	UNKNOWN	MARBLE																						3	300	20	20
CCM062		USGS		Geochemistry of rock samples from the National Geochemical Database: U.S. Geological Survey, Reston, VA.	U.S. Geological Survey	USGS		67.4378	-153.991	0.01				AAS	METAMORPHIC	UNKNOWN	UNKNOWN	MARBLE																												30
CCM062		USGS		Geochemistry of rock samples from the National Geochemical Database: U.S. Geological Survey, Reston, VA.	U.S. Geological Survey	USGS		67.4378	-153.991	0.01				ES	METAMORPHIC	UNKNOWN	UNKNOWN	MARBLE																						2	300	20	20	20
CCM070		USGS		Geochemistry of rock samples from the National Geochemical Database: U.S. Geological Survey, Reston, VA.	U.S. Geological Survey	USGS		67.1133	-155.396	0.01				AAS	METAMORPHIC	UNKNOWN	UNKNOWN	MARBLE																												15
CCM070		USGS		Geochemistry of rock samples from the National Geochemical Database: U.S. Geological Survey, Reston, VA.	U.S. Geological Survey	USGS		67.1133	-155.396	0.01				ES	METAMORPHIC	UNKNOWN	UNKNOWN	MARBLE																						2	500	20	10
CCM788		USGS		Geochemistry of rock samples from the National Geochemical Database: U.S. Geological Survey, Reston, VA.	U.S. Geological Survey	USGS		67.2733	-151.738	0.01				AAS	METAMORPHIC	UNKNOWN	UNKNOWN	MARBLE																												25
CCM627		USGS		Geochemistry of rock samples from the National Geochemical Database: U.S. Geological Survey, Reston, VA.	U.S. Geological Survey	USGS		64.418	-146.525	0.01				ES	METAMORPHIC	UNKNOWN	UNKNOWN	MARBLE																						5	1500	100	20	100
CCM628		USGS		Geochemistry of rock samples from the National Geochemical Database: U.S. Geological Survey, Reston, VA.	U.S. Geological Survey	USGS		64.4028	-146.543	0.01				ES	METAMORPHIC	UNKNOWN	UNKNOWN	MARBLE																						3	1500	30	10	50
CCM717		USGS		Geochemistry of rock samples from the National Geochemical Database: U.S. Geological Survey, Reston, VA.	U.S. Geological Survey	USGS		67.4553	-151.703	0.01				AAS	METAMORPHIC	UNKNOWN	UNKNOWN	MARBLE																												15
CCM717		USGS		Geochemistry of rock samples from the National Geochemical Database: U.S. Geological Survey, Reston, VA.	U.S. Geological Survey	USGS		67.4553	-151.703	0.01				ES	METAMORPHIC	UNKNOWN	UNKNOWN	MARBLE																						5	1500	20	10	20
CCM718		USGS		Geochemistry of rock samples from the National Geochemical Database: U.S. Geological Survey, Reston, VA.	U.S. Geological Survey	USGS		67.442	-151.723	0.01				AAS	METAMORPHIC	UNKNOWN	UNKNOWN	MARBLE																												30
CCM718		USGS		Geochemistry of rock samples from the National Geochemical Database: U.S. Geological Survey, Reston, VA.	U.S. Geological Survey	USGS		67.442	-151.723	0.01				ES	METAMORPHIC	UNKNOWN	UNKNOWN	MARBLE																						2	500			10			700
CCM721		USGS		Geochemistry of rock samples from the National Geochemical Database: U.S. Geological Survey, Reston, VA.	U.S. Geological Survey	USGS		67.4422	-152.219	0.01				AAS	METAMORPHIC	UNKNOWN	UNKNOWN	MARBLE																												30
CCM721		USGS		Geochemistry of rock samples from the National Geochemical Database: U.S. Geological Survey, Reston, VA.	U.S. Geological Survey	USGS		67.4422	-152.219	0.01				ES	METAMORPHIC	UNKNOWN	UNKNOWN	MARBLE																						1.5	500	15		7
CCM724		USGS		Geochemistry of rock samples from the National Geochemical Database: U.S. Geological Survey, Reston, VA.	U.S. Geological Survey	USGS		67.3464	-152.228	0.01				AAS	METAMORPHIC	UNKNOWN	UNKNOWN	MARBLE																												10
CCM724		USGS		Geochemistry of rock samples from the National Geochemical Database: U.S. Geological Survey, Reston, VA.	U.S. Geological Survey	USGS		67.3464	-152.228	0.01				ES	METAMORPHIC	UNKNOWN	UNKNOWN	MARBLE																						1	500
CCM738		USGS		Geochemistry of rock samples from the National Geochemical Database: U.S. Geological Survey, Reston, VA.	U.S. Geological Survey	USGS		67.3189	-152.223	0.01				AAS	METAMORPHIC	UNKNOWN	UNKNOWN	MARBLE																												10
CCM738		USGS		Geochemistry of rock samples from the National Geochemical Database: U.S. Geological Survey, Reston, VA.	U.S. Geological Survey	USGS		67.3189	-152.223	0.01				ES	METAMORPHIC	UNKNOWN	UNKNOWN	MARBLE																						1	500
CCM739		USGS		Geochemistry of rock samples from the National Geochemical Database: U.S. Geological Survey, Reston, VA.	U.S. Geological Survey	USGS		67.3219	-152.225	0.01				AAS	METAMORPHIC	UNKNOWN	UNKNOWN	MARBLE																												5
CCM739		USGS		Geochemistry of rock samples from the National Geochemical Database: U.S. Geological Survey, Reston, VA.	U.S. Geological Survey	USGS		67.3219	-152.225	0.01				ES	METAMORPHIC	UNKNOWN	UNKNOWN	MARBLE																						1	500
CCM750		USGS		Geochemistry of rock samples from the National Geochemical Database: U.S. Geological Survey, Reston, VA.	U.S. Geological Survey	USGS		67.2489	-151.578	0.01				AAS	METAMORPHIC	UNKNOWN	UNKNOWN	MARBLE																												200
CCM750		USGS		Geochemistry of rock samples from the National Geochemical Database: U.S. Geological Survey, Reston, VA.	U.S. Geological Survey	USGS		67.2489	-151.578	0.01				ES	METAMORPHIC	UNKNOWN	UNKNOWN	MARBLE																						3	300	50	15	100		300
CCM751		USGS		Geochemistry of rock samples from the National Geochemical Database: U.S. Geological Survey, Reston, VA.	U.S. Geological Survey	USGS		67.2489	-151.578	0.01				AAS	METAMORPHIC	UNKNOWN	UNKNOWN	MARBLE																												15
CCM751		USGS		Geochemistry of rock samples from the National Geochemical Database: U.S. Geological Survey, Reston, VA.	U.S. Geological Survey	USGS		67.2489	-151.578	0.01				ES	METAMORPHIC	UNKNOWN	UNKNOWN	MARBLE																						20	200	50	50	300		200		15
CCM761		USGS		Geochemistry of rock samples from the National Geochemical Database: U.S. Geological Survey, Reston, VA.	U.S. Geological Survey	USGS		67.4661	-151.728	0.01				AAS	METAMORPHIC	UNKNOWN	UNKNOWN	MARBLE																												10
CCM761		USGS		Geochemistry of rock samples from the National Geochemical Database: U.S. Geological Survey, Reston, VA.	U.S. Geological Survey	USGS		67.4661	-151.728	0.01				ES	METAMORPHIC	UNKNOWN	UNKNOWN	MARBLE																						0.7	200
CCM766		USGS		Geochemistry of rock samples from the National Geochemical Database: U.S. Geological Survey, Reston, VA.	U.S. Geological Survey	USGS		67.3631	-151.702	0.01				AAS	METAMORPHIC	UNKNOWN	UNKNOWN	MARBLE																												15
CCM766		USGS		Geochemistry of rock samples from the National Geochemical Database: U.S. Geological Survey, Reston, VA.	U.S. Geological Survey	USGS		67.3631	-151.702	0.01				ES	METAMORPHIC	UNKNOWN	UNKNOWN	MARBLE																						3	1000	10	10	20
CCM768		USGS		Geochemistry of rock samples from the National Geochemical Database: U.S. Geological Survey, Reston, VA.	U.S. Geological Survey	USGS		67.5128	-152.373	0.01				AAS	METAMORPHIC	UNKNOWN	UNKNOWN	MARBLE																												10
CCM768		USGS		Geochemistry of rock samples from the National Geochemical Database: U.S. Geological Survey, Reston, VA.	U.S. Geological Survey	USGS		67.5128	-152.373	0.01				ES	METAMORPHIC	UNKNOWN	UNKNOWN	MARBLE																						0.5	300			50
CCM788		USGS		Geochemistry of rock samples from the National Geochemical Database: U.S. Geological Survey, Reston, VA.	U.S. Geological Survey	USGS		67.2733	-151.738	0.01				ES	METAMORPHIC	UNKNOWN	UNKNOWN	MARBLE																						1.5	300	10		30
CCM789		USGS		Geochemistry of rock samples from the National Geochemical Database: U.S. Geological Survey, Reston, VA.	U.S. Geological Survey	USGS		67.3008	-151.116	0.01				AAS	METAMORPHIC	UNKNOWN	UNKNOWN	MARBLE																												75
CCM789		USGS		Geochemistry of rock samples from the National Geochemical Database: U.S. Geological Survey, Reston, VA.	U.S. Geological Survey	USGS		67.3008	-151.116	0.01				ES	METAMORPHIC	UNKNOWN	UNKNOWN	MARBLE																						5	1000	100	10	50
CCM799		USGS		Geochemistry of rock samples from the National Geochemical Database: U.S. Geological Survey, Reston, VA.	U.S. Geological Survey	USGS		67.3364	-152.103	0.01				AAS	METAMORPHIC	UNKNOWN	UNKNOWN	MARBLE																												25
CCM799		USGS		Geochemistry of rock samples from the National Geochemical Database: U.S. Geological Survey, Reston, VA.	U.S. Geological Survey	USGS		67.3364	-152.103	0.01				ES	METAMORPHIC	UNKNOWN	UNKNOWN	MARBLE																						1.5	700	20		10
CCM814		USGS		Geochemistry of rock samples from the National Geochemical Database: U.S. Geological Survey, Reston, VA.	U.S. Geological Survey	USGS		67.5364	-152.551	0.01				AAS	METAMORPHIC	UNKNOWN	UNKNOWN	MARBLE																												5
CCM814		USGS		Geochemistry of rock samples from the National Geochemical Database: U.S. Geological Survey, Reston, VA.	U.S. Geological Survey	USGS		67.5364	-152.551	0.01				ES	METAMORPHIC	UNKNOWN	UNKNOWN	MARBLE																						0.5	150			10
CCM829		USGS		Geochemistry of rock samples from the National Geochemical Database: U.S. Geological Survey, Reston, VA.	U.S. Geological Survey	USGS		67.3036	-151.119	0.01				AAS	METAMORPHIC	UNKNOWN	UNKNOWN	MARBLE																												25
CCM829		USGS		Geochemistry of rock samples from the National Geochemical Database: U.S. Geological Survey, Reston, VA.	U.S. Geological Survey	USGS		67.3036	-151.119	0.01				ES	METAMORPHIC	UNKNOWN	UNKNOWN	MARBLE																						2	500	20		20
CCM832		USGS		Geochemistry of rock samples from the National Geochemical Database: U.S. Geological Survey, Reston, VA.	U.S. Geological Survey	USGS		67.3219	-151.106	0.01				AAS	METAMORPHIC	UNKNOWN	UNKNOWN	MARBLE																												60
CCM832		USGS		Geochemistry of rock samples from the National Geochemical Database: U.S. Geological Survey, Reston, VA.	U.S. Geological Survey	USGS		67.3219	-151.106	0.01				ES	METAMORPHIC	UNKNOWN	UNKNOWN	MARBLE																						5	1000	50	20	50
CCM846		USGS		Geochemistry of rock samples from the National Geochemical Database: U.S. Geological Survey, Reston, VA.	U.S. Geological Survey	USGS		67.3464	-151.936	0.01				AAS	METAMORPHIC	UNKNOWN	UNKNOWN	MARBLE																												5
CCM846		USGS		Geochemistry of rock samples from the National Geochemical Database: U.S. Geological Survey, Reston, VA.	U.S. Geological Survey	USGS		67.3464	-151.936	0.01				ES	METAMORPHIC	UNKNOWN	UNKNOWN	MARBLE																						0.5	200			10
CCM866		USGS		Geochemistry of rock samples from the National Geochemical Database: U.S. Geological Survey, Reston, VA.	U.S. Geological Survey	USGS		67.3847	-152.198	0.01				AAS	METAMORPHIC	UNKNOWN	UNKNOWN	MARBLE																												40
CCM866		USGS		Geochemistry of rock samples from the National Geochemical Database: U.S. Geological Survey, Reston, VA.	U.S. Geological Survey	USGS		67.3847	-152.198	0.01				ES	METAMORPHIC	UNKNOWN	UNKNOWN	MARBLE																						3	700	30	15	50		200
CCM876		USGS		Geochemistry of rock samples from the National Geochemical Database: U.S. Geological Survey, Reston, VA.	U.S. Geological Survey	USGS		67.2669	-152.918	0.01				AAS	METAMORPHIC	UNKNOWN	UNKNOWN	MARBLE																												55
CCM876		USGS		Geochemistry of rock samples from the National Geochemical Database: U.S. Geological Survey, Reston, VA.	U.S. Geological Survey	USGS		67.2669	-152.918	0.01				ES	METAMORPHIC	UNKNOWN	UNKNOWN	MARBLE																						2	5000	10	10	20
CCM898		USGS		Geochemistry of rock samples from the National Geochemical Database: U.S. Geological Survey, Reston, VA.	U.S. Geological Survey	USGS		67.2142	-152.046	0.01				AAS	METAMORPHIC	UNKNOWN	UNKNOWN	MARBLE																												10
CCM898		USGS		Geochemistry of rock samples from the National Geochemical Database: U.S. Geological Survey, Reston, VA.	U.S. Geological Survey	USGS		67.2142	-152.046	0.01				ES	METAMORPHIC	UNKNOWN	UNKNOWN	MARBLE																						0.5	200
CCM901		USGS		Geochemistry of rock samples from the National Geochemical Database: U.S. Geological Survey, Reston, VA.	U.S. Geological Survey	USGS		67.0878	-152.722	0.01				AAS	METAMORPHIC	UNKNOWN	UNKNOWN	MARBLE																												15
CCM901		USGS		Geochemistry of rock samples from the National Geochemical Database: U.S. Geological Survey, Reston, VA.	U.S. Geological Survey	USGS		67.0878	-152.722	0.01				ES	METAMORPHIC	UNKNOWN	UNKNOWN	MARBLE																						0.15	200	10		10
CCN215		USGS		Geochemistry of rock samples from the National Geochemical Database: U.S. Geological Survey, Reston, VA.	U.S. Geological Survey	USGS		67.1042	-153.874	0.01				AAS	METAMORPHIC	UNKNOWN	UNKNOWN	MARBLE																												20
CCN215		USGS		Geochemistry of rock samples from the National Geochemical Database: U.S. Geological Survey, Reston, VA.	U.S. Geological Survey	USGS		67.1042	-153.874	0.01				ES	METAMORPHIC	UNKNOWN	UNKNOWN	MARBLE																						0.5	70	10
CCN216		USGS		Geochemistry of rock samples from the National Geochemical Database: U.S. Geological Survey, Reston, VA.	U.S. Geological Survey	USGS		67.0983	-153.871	0.01				AAS	METAMORPHIC	UNKNOWN	UNKNOWN	MARBLE																												5
CCN216		USGS		Geochemistry of rock samples from the National Geochemical Database: U.S. Geological Survey, Reston, VA.	U.S. Geological Survey	USGS		67.0983	-153.871	0.01				ES	METAMORPHIC	UNKNOWN	UNKNOWN	MARBLE																						0.1	20			10
CCN221		USGS		Geochemistry of rock samples from the National Geochemical Database: U.S. Geological Survey, Reston, VA.	U.S. Geological Survey	USGS		67.4883	-153.357	0.01				AAS	METAMORPHIC	UNKNOWN	UNKNOWN	MARBLE																												15
CCN218		USGS		Geochemistry of rock samples from the National Geochemical Database: U.S. Geological Survey, Reston, VA.	U.S. Geological Survey	USGS		67.3317	-153.458	0.01				ES	METAMORPHIC	UNKNOWN	UNKNOWN	MARBLE																							50
CCN219		USGS		Geochemistry of rock samples from the National Geochemical Database: U.S. Geological Survey, Reston, VA.	U.S. Geological Survey	USGS		67.3647	-153.439	0.01				AAS	METAMORPHIC	UNKNOWN	UNKNOWN	MARBLE																												5
CCN219		USGS		Geochemistry of rock samples from the National Geochemical Database: U.S. Geological Survey, Reston, VA.	U.S. Geological Survey	USGS		67.3647	-153.439	0.01				ES	METAMORPHIC	UNKNOWN	UNKNOWN	MARBLE																						0.3	200
CCN221		USGS		Geochemistry of rock samples from the National Geochemical Database: U.S. Geological Survey, Reston, VA.	U.S. Geological Survey	USGS		67.4883	-153.357	0.01				ES	METAMORPHIC	UNKNOWN	UNKNOWN	MARBLE																						0.5	300
CCN222		USGS		Geochemistry of rock samples from the National Geochemical Database: U.S. Geological Survey, Reston, VA.	U.S. Geological Survey	USGS		67.4883	-153.357	0.01				AAS	METAMORPHIC	UNKNOWN	UNKNOWN	MARBLE																												15
CCN222		USGS		Geochemistry of rock samples from the National Geochemical Database: U.S. Geological Survey, Reston, VA.	U.S. Geological Survey	USGS		67.4883	-153.357	0.01				ES	METAMORPHIC	UNKNOWN	UNKNOWN	MARBLE																						0.5	200
CCN224		USGS		Geochemistry of rock samples from the National Geochemical Database: U.S. Geological Survey, Reston, VA.	U.S. Geological Survey	USGS		67.4883	-153.357	0.01				AAS	METAMORPHIC	UNKNOWN	UNKNOWN	MARBLE																												45
CCN224		USGS		Geochemistry of rock samples from the National Geochemical Database: U.S. Geological Survey, Reston, VA.	U.S. Geological Survey	USGS		67.4883	-153.357	0.01				ES	METAMORPHIC	UNKNOWN	UNKNOWN	MARBLE																						2	300	15	10
CCN225		USGS		Geochemistry of rock samples from the National Geochemical Database: U.S. Geological Survey, Reston, VA.	U.S. Geological Survey	USGS		67.4883	-153.357	0.01				AAS	METAMORPHIC	UNKNOWN	UNKNOWN	MARBLE																												5
CCN225		USGS		Geochemistry of rock samples from the National Geochemical Database: U.S. Geological Survey, Reston, VA.	U.S. Geological Survey	USGS		67.4883	-153.357	0.01				ES	METAMORPHIC	UNKNOWN	UNKNOWN	MARBLE																						0.2	150
CCN229		USGS		Geochemistry of rock samples from the National Geochemical Database: U.S. Geological Survey, Reston, VA.	U.S. Geological Survey	USGS		67.445	-153.268	0.01				AAS	METAMORPHIC	UNKNOWN	UNKNOWN	MARBLE																												10
CCN229		USGS		Geochemistry of rock samples from the National Geochemical Database: U.S. Geological Survey, Reston, VA.	U.S. Geological Survey	USGS		67.445	-153.268	0.01				ES	METAMORPHIC	UNKNOWN	UNKNOWN	MARBLE																						0.2	200
CCN230		USGS		Geochemistry of rock samples from the National Geochemical Database: U.S. Geological Survey, Reston, VA.	U.S. Geological Survey	USGS		67.445	-153.268	0.01				AAS	METAMORPHIC	UNKNOWN	UNKNOWN	MARBLE																												15
CCN230		USGS		Geochemistry of rock samples from the National Geochemical Database: U.S. Geological Survey, Reston, VA.	U.S. Geological Survey	USGS		67.445	-153.268	0.01				ES	METAMORPHIC	UNKNOWN	UNKNOWN	MARBLE																						0.3	150
CCN233		USGS		Geochemistry of rock samples from the National Geochemical Database: U.S. Geological Survey, Reston, VA.	U.S. Geological Survey	USGS		67.4569	-153.107	0.01				ES	METAMORPHIC	UNKNOWN	UNKNOWN	MARBLE																						0.2	700
CCN234		USGS		Geochemistry of rock samples from the National Geochemical Database: U.S. Geological Survey, Reston, VA.	U.S. Geological Survey	USGS		67.4569	-153.107	0.01				AAS	METAMORPHIC	UNKNOWN	UNKNOWN	MARBLE																												240
CCN234		USGS		Geochemistry of rock samples from the National Geochemical Database: U.S. Geological Survey, Reston, VA.	U.S. Geological Survey	USGS		67.4569	-153.107	0.01				ES	METAMORPHIC	UNKNOWN	UNKNOWN	MARBLE																						20	700			30
CCN236		USGS		Geochemistry of rock samples from the National Geochemical Database: U.S. Geological Survey, Reston, VA.	U.S. Geological Survey	USGS		67.3936	-153.454	0.01				ES	METAMORPHIC	UNKNOWN	UNKNOWN	MARBLE																						0.1	50
CCN237		USGS		Geochemistry of rock samples from the National Geochemical Database: U.S. Geological Survey, Reston, VA.	U.S. Geological Survey	USGS		67.3636	-153.331	0.01				AAS	METAMORPHIC	UNKNOWN	UNKNOWN	MARBLE																												10
CCN237		USGS		Geochemistry of rock samples from the National Geochemical Database: U.S. Geological Survey, Reston, VA.	U.S. Geological Survey	USGS		67.3636	-153.331	0.01				ES	METAMORPHIC	UNKNOWN	UNKNOWN	MARBLE																						0.3	100
CCN238		USGS		Geochemistry of rock samples from the National Geochemical Database: U.S. Geological Survey, Reston, VA.	U.S. Geological Survey	USGS		67.3636	-153.331	0.01				AAS	METAMORPHIC	UNKNOWN	UNKNOWN	MARBLE																												45
CCN238		USGS		Geochemistry of rock samples from the National Geochemical Database: U.S. Geological Survey, Reston, VA.	U.S. Geological Survey	USGS		67.3636	-153.331	0.01				ES	METAMORPHIC	UNKNOWN	UNKNOWN	MARBLE																						1	1000			10
CCN240		USGS		Geochemistry of rock samples from the National Geochemical Database: U.S. Geological Survey, Reston, VA.	U.S. Geological Survey	USGS		67.3636	-153.331	0.01				AAS	METAMORPHIC	UNKNOWN	UNKNOWN	MARBLE																												90
CCN240		USGS		Geochemistry of rock samples from the National Geochemical Database: U.S. Geological Survey, Reston, VA.	U.S. Geological Survey	USGS		67.3636	-153.331	0.01				ES	METAMORPHIC	UNKNOWN	UNKNOWN	MARBLE																						5	500	70	100	150
CCN241		USGS		Geochemistry of rock samples from the National Geochemical Database: U.S. Geological Survey, Reston, VA.	U.S. Geological Survey	USGS		67.3811	-153.216	0.01				AAS	METAMORPHIC	UNKNOWN	UNKNOWN	MARBLE																												5
CCN241		USGS		Geochemistry of rock samples from the National Geochemical Database: U.S. Geological Survey, Reston, VA.	U.S. Geological Survey	USGS		67.3811	-153.216	0.01				ES	METAMORPHIC	UNKNOWN	UNKNOWN	MARBLE																						0.07
CCN243		USGS		Geochemistry of rock samples from the National Geochemical Database: U.S. Geological Survey, Reston, VA.	U.S. Geological Survey	USGS		67.315	-153.051	0.01				AAS	METAMORPHIC	UNKNOWN	UNKNOWN	MARBLE																												5
CCN243		USGS		Geochemistry of rock samples from the National Geochemical Database: U.S. Geological Survey, Reston, VA.	U.S. Geological Survey	USGS		67.315	-153.051	0.01				ES	METAMORPHIC	UNKNOWN	UNKNOWN	MARBLE																						0.15
CCN245		USGS		Geochemistry of rock samples from the National Geochemical Database: U.S. Geological Survey, Reston, VA.	U.S. Geological Survey	USGS		67.3336	-153.143	0.01				AAS	METAMORPHIC	UNKNOWN	UNKNOWN	MARBLE																												60
CCN245		USGS		Geochemistry of rock samples from the National Geochemical Database: U.S. Geological Survey, Reston, VA.	U.S. Geological Survey	USGS		67.3336	-153.143	0.01				ES	METAMORPHIC	UNKNOWN	UNKNOWN	MARBLE																						0.15	20
CCN249		USGS		Geochemistry of rock samples from the National Geochemical Database: U.S. Geological Survey, Reston, VA.	U.S. Geological Survey	USGS		67.2844	-153.614	0.01				AAS	METAMORPHIC	UNKNOWN	UNKNOWN	MARBLE																												10
CCN249		USGS		Geochemistry of rock samples from the National Geochemical Database: U.S. Geological Survey, Reston, VA.	U.S. Geological Survey	USGS		67.2844	-153.614	0.01				ES	METAMORPHIC	UNKNOWN	UNKNOWN	MARBLE																						0.7	300
CCN250		USGS		Geochemistry of rock samples from the National Geochemical Database: U.S. Geological Survey, Reston, VA.	U.S. Geological Survey	USGS		67.2844	-153.614	0.01				AAS	METAMORPHIC	UNKNOWN	UNKNOWN	MARBLE																												5
CCN250		USGS		Geochemistry of rock samples from the National Geochemical Database: U.S. Geological Survey, Reston, VA.	U.S. Geological Survey	USGS		67.2844	-153.614	0.01				ES	METAMORPHIC	UNKNOWN	UNKNOWN	MARBLE																						0.2	70
CCN251		USGS		Geochemistry of rock samples from the National Geochemical Database: U.S. Geological Survey, Reston, VA.	U.S. Geological Survey	USGS		67.3511	-153.889	0.01				AAS	METAMORPHIC	UNKNOWN	UNKNOWN	MARBLE																												5
CCN251		USGS		Geochemistry of rock samples from the National Geochemical Database: U.S. Geological Survey, Reston, VA.	U.S. Geological Survey	USGS		67.3511	-153.889	0.01				ES	METAMORPHIC	UNKNOWN	UNKNOWN	MARBLE																						0.1	200
CCN253		USGS		Geochemistry of rock samples from the National Geochemical Database: U.S. Geological Survey, Reston, VA.	U.S. Geological Survey	USGS		67.4167	-153.615	0.01				AAS	METAMORPHIC	UNKNOWN	UNKNOWN	MARBLE																												5
CCN253		USGS		Geochemistry of rock samples from the National Geochemical Database: U.S. Geological Survey, Reston, VA.	U.S. Geological Survey	USGS		67.4167	-153.615	0.01				ES	METAMORPHIC	UNKNOWN	UNKNOWN	MARBLE																							20
CCN268		USGS		Geochemistry of rock samples from the National Geochemical Database: U.S. Geological Survey, Reston, VA.	U.S. Geological Survey	USGS		67.2122	-154.262	0.01				AAS	METAMORPHIC	UNKNOWN	UNKNOWN	MARBLE																												10
CCN268		USGS		Geochemistry of rock samples from the National Geochemical Database: U.S. Geological Survey, Reston, VA.	U.S. Geological Survey	USGS		67.2122	-154.262	0.01				ES	METAMORPHIC	UNKNOWN	UNKNOWN	MARBLE																						0.2	10
CCN270		USGS		Geochemistry of rock samples from the National Geochemical Database: U.S. Geological Survey, Reston, VA.	U.S. Geological Survey	USGS		67.2508	-154.124	0.01				AAS	METAMORPHIC	UNKNOWN	UNKNOWN	MARBLE																												10
CCN270		USGS		Geochemistry of rock samples from the National Geochemical Database: U.S. Geological Survey, Reston, VA.	U.S. Geological Survey	USGS		67.2508	-154.124	0.01				ES	METAMORPHIC	UNKNOWN	UNKNOWN	MARBLE																						0.2	50
CCN273		USGS		Geochemistry of rock samples from the National Geochemical Database: U.S. Geological Survey, Reston, VA.	U.S. Geological Survey	USGS		67.1764	-154.143	0.01				AAS	METAMORPHIC	UNKNOWN	UNKNOWN	MARBLE																												30
CCN273		USGS		Geochemistry of rock samples from the National Geochemical Database: U.S. Geological Survey, Reston, VA.	U.S. Geological Survey	USGS		67.1764	-154.143	0.01				ES	METAMORPHIC	UNKNOWN	UNKNOWN	MARBLE																						3	300	20	20
CCN274		USGS		Geochemistry of rock samples from the National Geochemical Database: U.S. Geological Survey, Reston, VA.	U.S. Geological Survey	USGS		67.1764	-154.143	0.01				AAS	METAMORPHIC	UNKNOWN	UNKNOWN	MARBLE																												5
CCN274		USGS		Geochemistry of rock samples from the National Geochemical Database: U.S. Geological Survey, Reston, VA.	U.S. Geological Survey	USGS		67.1764	-154.143	0.01				ES	METAMORPHIC	UNKNOWN	UNKNOWN	MARBLE																						0.5	100
CCN276		USGS		Geochemistry of rock samples from the National Geochemical Database: U.S. Geological Survey, Reston, VA.	U.S. Geological Survey	USGS		67.2861	-154.291	0.01				AAS	METAMORPHIC	UNKNOWN	UNKNOWN	MARBLE																												10
CCN276		USGS		Geochemistry of rock samples from the National Geochemical Database: U.S. Geological Survey, Reston, VA.	U.S. Geological Survey	USGS		67.2861	-154.291	0.01				ES	METAMORPHIC	UNKNOWN	UNKNOWN	MARBLE																						0.1	20
CCN280		USGS		Geochemistry of rock samples from the National Geochemical Database: U.S. Geological Survey, Reston, VA.	U.S. Geological Survey	USGS		67.1689	-154.55	0.01				AAS	METAMORPHIC	UNKNOWN	UNKNOWN	MARBLE																												5
CCN280		USGS		Geochemistry of rock samples from the National Geochemical Database: U.S. Geological Survey, Reston, VA.	U.S. Geological Survey	USGS		67.1689	-154.55	0.01				ES	METAMORPHIC	UNKNOWN	UNKNOWN	MARBLE																						0.2	20
CCN370		USGS		Geochemistry of rock samples from the National Geochemical Database: U.S. Geological Survey, Reston, VA.	U.S. Geological Survey	USGS		67.1128	-154.365	0.01				AAS	METAMORPHIC	UNKNOWN	UNKNOWN	MARBLE																												5
CCN370		USGS		Geochemistry of rock samples from the National Geochemical Database: U.S. Geological Survey, Reston, VA.	U.S. Geological Survey	USGS		67.1128	-154.365	0.01				ES	METAMORPHIC	UNKNOWN	UNKNOWN	MARBLE																						0.2	200
CCN377		USGS		Geochemistry of rock samples from the National Geochemical Database: U.S. Geological Survey, Reston, VA.	U.S. Geological Survey	USGS		67.5142	-153.485	0.01				AAS	METAMORPHIC	UNKNOWN	UNKNOWN	MARBLE																												110
CCN377		USGS		Geochemistry of rock samples from the National Geochemical Database: U.S. Geological Survey, Reston, VA.	U.S. Geological Survey	USGS		67.5142	-153.485	0.01				ES	METAMORPHIC	UNKNOWN	UNKNOWN	MARBLE																						1	200			20
CCN383		USGS		Geochemistry of rock samples from the National Geochemical Database: U.S. Geological Survey, Reston, VA.	U.S. Geological Survey	USGS		67.5775	-153.272	0.01				AAS	METAMORPHIC	UNKNOWN	UNKNOWN	MARBLE																												15
CCN383		USGS		Geochemistry of rock samples from the National Geochemical Database: U.S. Geological Survey, Reston, VA.	U.S. Geological Survey	USGS		67.5775	-153.272	0.01				ES	METAMORPHIC	UNKNOWN	UNKNOWN	MARBLE																						1	300	10	10	30
CCN387		USGS		Geochemistry of rock samples from the National Geochemical Database: U.S. Geological Survey, Reston, VA.	U.S. Geological Survey	USGS		67.415	-154.273	0.01				AAS	METAMORPHIC	UNKNOWN	UNKNOWN	MARBLE																												10
CCN387		USGS		Geochemistry of rock samples from the National Geochemical Database: U.S. Geological Survey, Reston, VA.	U.S. Geological Survey	USGS		67.415	-154.273	0.01				ES	METAMORPHIC	UNKNOWN	UNKNOWN	MARBLE																						0.2	50			20
CCN453		USGS		Geochemistry of rock samples from the National Geochemical Database: U.S. Geological Survey, Reston, VA.	U.S. Geological Survey	USGS		67.6339	-155.203	0.01				AAS	METAMORPHIC	UNKNOWN	UNKNOWN	MARBLE																												10
CCN453		USGS		Geochemistry of rock samples from the National Geochemical Database: U.S. Geological Survey, Reston, VA.	U.S. Geological Survey	USGS		67.6339	-155.203	0.01				ES	METAMORPHIC	UNKNOWN	UNKNOWN	MARBLE																						0.2	50
CCN461		USGS		Geochemistry of rock samples from the National Geochemical Database: U.S. Geological Survey, Reston, VA.	U.S. Geological Survey	USGS		67.5783	-154.985	0.01				AAS	METAMORPHIC	UNKNOWN	UNKNOWN	MARBLE																												10
CCN461		USGS		Geochemistry of rock samples from the National Geochemical Database: U.S. Geological Survey, Reston, VA.	U.S. Geological Survey	USGS		67.5783	-154.985	0.01				ES	METAMORPHIC	UNKNOWN	UNKNOWN	MARBLE																							100
CCS237		USGS		Geochemistry of rock samples from the National Geochemical Database: U.S. Geological Survey, Reston, VA.	U.S. Geological Survey	USGS		63.2167	-154.781	0.01				AAS	METAMORPHIC	UNKNOWN	UNKNOWN	MARBLE																										90		160
CCS237		USGS		Geochemistry of rock samples from the National Geochemical Database: U.S. Geological Survey, Reston, VA.	U.S. Geological Survey	USGS		63.2167	-154.781	0.01				COL	METAMORPHIC	UNKNOWN	UNKNOWN	MARBLE																													40
CCS237		USGS		Geochemistry of rock samples from the National Geochemical Database: U.S. Geological Survey, Reston, VA.	U.S. Geological Survey	USGS		63.2167	-154.781	0.01				ES	METAMORPHIC	UNKNOWN	UNKNOWN	MARBLE																						15	700	50	50	150		200
CCS348		USGS		Geochemistry of rock samples from the National Geochemical Database: U.S. Geological Survey, Reston, VA.	U.S. Geological Survey	USGS		63.6736	-154.056	0.01				AAS	METAMORPHIC	UNKNOWN	UNKNOWN	MARBLE																										2000		2000
CCS348		USGS		Geochemistry of rock samples from the National Geochemical Database: U.S. Geological Survey, Reston, VA.	U.S. Geological Survey	USGS		63.6736	-154.056	0.01				COL	METAMORPHIC	UNKNOWN	UNKNOWN	MARBLE																													1000
CCS348		USGS		Geochemistry of rock samples from the National Geochemical Database: U.S. Geological Survey, Reston, VA.	U.S. Geological Survey	USGS		63.6736	-154.056	0.01				ES	METAMORPHIC	UNKNOWN	UNKNOWN	MARBLE																						5	200	5		1500		300	1000	20
CCV009		USGS		Geochemistry of rock samples from the National Geochemical Database: U.S. Geological Survey, Reston, VA.	U.S. Geological Survey	USGS		67.1533	-155.064	0.01				AAS	METAMORPHIC	UNKNOWN	UNKNOWN	MARBLE																												45
CCV009		USGS		Geochemistry of rock samples from the National Geochemical Database: U.S. Geological Survey, Reston, VA.	U.S. Geological Survey	USGS		67.1533	-155.064	0.01				ES	METAMORPHIC	UNKNOWN	UNKNOWN	MARBLE																						7	500	20		10
CCV034		USGS		Geochemistry of rock samples from the National Geochemical Database: U.S. Geological Survey, Reston, VA.	U.S. Geological Survey	USGS		67.2028	-155.868	0.01				AAS	METAMORPHIC	UNKNOWN	UNKNOWN	MARBLE																												40
CCV034		USGS		Geochemistry of rock samples from the National Geochemical Database: U.S. Geological Survey, Reston, VA.	U.S. Geological Survey	USGS		67.2028	-155.868	0.01				ES	METAMORPHIC	UNKNOWN	UNKNOWN	MARBLE																						5	700	30	15	20
CCV052		USGS		Geochemistry of rock samples from the National Geochemical Database: U.S. Geological Survey, Reston, VA.	U.S. Geological Survey	USGS		67.5433	-155.773	0.01				AAS	METAMORPHIC	UNKNOWN	UNKNOWN	MARBLE																												15
CCV052		USGS		Geochemistry of rock samples from the National Geochemical Database: U.S. Geological Survey, Reston, VA.	U.S. Geological Survey	USGS		67.5433	-155.773	0.01				ES	METAMORPHIC	UNKNOWN	UNKNOWN	MARBLE																						0.2	300			15
CCV055		USGS		Geochemistry of rock samples from the National Geochemical Database: U.S. Geological Survey, Reston, VA.	U.S. Geological Survey	USGS		67.5206	-155.581	0.01				AAS	METAMORPHIC	UNKNOWN	UNKNOWN	MARBLE																												10
CCV055		USGS		Geochemistry of rock samples from the National Geochemical Database: U.S. Geological Survey, Reston, VA.	U.S. Geological Survey	USGS		67.5206	-155.581	0.01				ES	METAMORPHIC	UNKNOWN	UNKNOWN	MARBLE																						0.2	700
CCV056		USGS		Geochemistry of rock samples from the National Geochemical Database: U.S. Geological Survey, Reston, VA.	U.S. Geological Survey	USGS		67.5047	-155.496	0.01				AAS	METAMORPHIC	UNKNOWN	UNKNOWN	MARBLE																												15
CCV056		USGS		Geochemistry of rock samples from the National Geochemical Database: U.S. Geological Survey, Reston, VA.	U.S. Geological Survey	USGS		67.5047	-155.496	0.01				ES	METAMORPHIC	UNKNOWN	UNKNOWN	MARBLE																							50
CCV066		USGS		Geochemistry of rock samples from the National Geochemical Database: U.S. Geological Survey, Reston, VA.	U.S. Geological Survey	USGS		67.52	-155.113	0.01				AAS	METAMORPHIC	UNKNOWN	UNKNOWN	MARBLE																												50
CCV066		USGS		Geochemistry of rock samples from the National Geochemical Database: U.S. Geological Survey, Reston, VA.	U.S. Geological Survey	USGS		67.52	-155.113	0.01				ES	METAMORPHIC	UNKNOWN	UNKNOWN	MARBLE																						10	1000	100	50	300				5
CCV067		USGS		Geochemistry of rock samples from the National Geochemical Database: U.S. Geological Survey, Reston, VA.	U.S. Geological Survey	USGS		67.52	-155.113	0.01				AAS	METAMORPHIC	UNKNOWN	UNKNOWN	MARBLE																												320
CCV067		USGS		Geochemistry of rock samples from the National Geochemical Database: U.S. Geological Survey, Reston, VA.	U.S. Geological Survey	USGS		67.52	-155.113	0.01				ES	METAMORPHIC	UNKNOWN	UNKNOWN	MARBLE																						7	200	150	20	200		1000		3
CCV068		USGS		Geochemistry of rock samples from the National Geochemical Database: U.S. Geological Survey, Reston, VA.	U.S. Geological Survey	USGS		67.4411	-155.268	0.01				AAS	METAMORPHIC	UNKNOWN	UNKNOWN	MARBLE																												30
CCV068		USGS		Geochemistry of rock samples from the National Geochemical Database: U.S. Geological Survey, Reston, VA.	U.S. Geological Survey	USGS		67.4411	-155.268	0.01				ES	METAMORPHIC	UNKNOWN	UNKNOWN	MARBLE																						5	1500	10		10
CCV077		USGS		Geochemistry of rock samples from the National Geochemical Database: U.S. Geological Survey, Reston, VA.	U.S. Geological Survey	USGS		67.5742	-154.886	0.01				AAS	METAMORPHIC	UNKNOWN	UNKNOWN	MARBLE																												5
CCV077		USGS		Geochemistry of rock samples from the National Geochemical Database: U.S. Geological Survey, Reston, VA.	U.S. Geological Survey	USGS		67.5742	-154.886	0.01				ES	METAMORPHIC	UNKNOWN	UNKNOWN	MARBLE																							100
CCV082		USGS		Geochemistry of rock samples from the National Geochemical Database: U.S. Geological Survey, Reston, VA.	U.S. Geological Survey	USGS		67.5242	-154.652	0.01				AAS	METAMORPHIC	UNKNOWN	UNKNOWN	MARBLE																												15
CCV082		USGS		Geochemistry of rock samples from the National Geochemical Database: U.S. Geological Survey, Reston, VA.	U.S. Geological Survey	USGS		67.5242	-154.652	0.01				ES	METAMORPHIC	UNKNOWN	UNKNOWN	MARBLE																						3	500	10		5
CCV083		USGS		Geochemistry of rock samples from the National Geochemical Database: U.S. Geological Survey, Reston, VA.	U.S. Geological Survey	USGS		67.5244	-154.607	0.01				AAS	METAMORPHIC	UNKNOWN	UNKNOWN	MARBLE																												20
CCV083		USGS		Geochemistry of rock samples from the National Geochemical Database: U.S. Geological Survey, Reston, VA.	U.S. Geological Survey	USGS		67.5244	-154.607	0.01				ES	METAMORPHIC	UNKNOWN	UNKNOWN	MARBLE																						2	1500			15
CCV090		USGS		Geochemistry of rock samples from the National Geochemical Database: U.S. Geological Survey, Reston, VA.	U.S. Geological Survey	USGS		67.2811	-155.982	0.01				AAS	METAMORPHIC	UNKNOWN	UNKNOWN	MARBLE																												25
CCV090		USGS		Geochemistry of rock samples from the National Geochemical Database: U.S. Geological Survey, Reston, VA.	U.S. Geological Survey	USGS		67.2811	-155.982	0.01				ES	METAMORPHIC	UNKNOWN	UNKNOWN	MARBLE																						5	700	10		10
CCV094		USGS		Geochemistry of rock samples from the National Geochemical Database: U.S. Geological Survey, Reston, VA.	U.S. Geological Survey	USGS		67.3978	-155.573	0.01				AAS	METAMORPHIC	UNKNOWN	UNKNOWN	MARBLE																												15
CCV094		USGS		Geochemistry of rock samples from the National Geochemical Database: U.S. Geological Survey, Reston, VA.	U.S. Geological Survey	USGS		67.3978	-155.573	0.01				ES	METAMORPHIC	UNKNOWN	UNKNOWN	MARBLE																						2	1000
CCV096		USGS		Geochemistry of rock samples from the National Geochemical Database: U.S. Geological Survey, Reston, VA.	U.S. Geological Survey	USGS		67.3511	-155.866	0.01				AAS	METAMORPHIC	UNKNOWN	UNKNOWN	MARBLE																												10
CCV096		USGS		Geochemistry of rock samples from the National Geochemical Database: U.S. Geological Survey, Reston, VA.	U.S. Geological Survey	USGS		67.3511	-155.866	0.01				ES	METAMORPHIC	UNKNOWN	UNKNOWN	MARBLE																						2	1000
CCV197		USGS		Geochemistry of rock samples from the National Geochemical Database: U.S. Geological Survey, Reston, VA.	U.S. Geological Survey	USGS		67.2267	-154.238	0.01				AAS	METAMORPHIC	UNKNOWN	UNKNOWN	MARBLE																												10
CCV197		USGS		Geochemistry of rock samples from the National Geochemical Database: U.S. Geological Survey, Reston, VA.	U.S. Geological Survey	USGS		67.2267	-154.238	0.01				ES	METAMORPHIC	UNKNOWN	UNKNOWN	MARBLE																						1	150
CCV198		USGS		Geochemistry of rock samples from the National Geochemical Database: U.S. Geological Survey, Reston, VA.	U.S. Geological Survey	USGS		67.2289	-154.166	0.01				AAS	METAMORPHIC	UNKNOWN	UNKNOWN	MARBLE																												10
CCV198		USGS		Geochemistry of rock samples from the National Geochemical Database: U.S. Geological Survey, Reston, VA.	U.S. Geological Survey	USGS		67.2289	-154.166	0.01				ES	METAMORPHIC	UNKNOWN	UNKNOWN	MARBLE																						1.5	200
CCV199		USGS		Geochemistry of rock samples from the National Geochemical Database: U.S. Geological Survey, Reston, VA.	U.S. Geological Survey	USGS		67.2458	-153.995	0.01				AAS	METAMORPHIC	UNKNOWN	UNKNOWN	MARBLE																												10
CCV199		USGS		Geochemistry of rock samples from the National Geochemical Database: U.S. Geological Survey, Reston, VA.	U.S. Geological Survey	USGS		67.2458	-153.995	0.01				ES	METAMORPHIC	UNKNOWN	UNKNOWN	MARBLE																						1	500
CCV201		USGS		Geochemistry of rock samples from the National Geochemical Database: U.S. Geological Survey, Reston, VA.	U.S. Geological Survey	USGS		67.2089	-153.916	0.01				AAS	METAMORPHIC	UNKNOWN	UNKNOWN	MARBLE																												45
CCV201		USGS		Geochemistry of rock samples from the National Geochemical Database: U.S. Geological Survey, Reston, VA.	U.S. Geological Survey	USGS		67.2089	-153.916	0.01				ES	METAMORPHIC	UNKNOWN	UNKNOWN	MARBLE																						20	1500	100	100	150		200
CCV202		USGS		Geochemistry of rock samples from the National Geochemical Database: U.S. Geological Survey, Reston, VA.	U.S. Geological Survey	USGS		67.2089	-153.916	0.01				AAS	METAMORPHIC	UNKNOWN	UNKNOWN	MARBLE																												10
CCV202		USGS		Geochemistry of rock samples from the National Geochemical Database: U.S. Geological Survey, Reston, VA.	U.S. Geological Survey	USGS		67.2089	-153.916	0.01				ES	METAMORPHIC	UNKNOWN	UNKNOWN	MARBLE																						0.2	100
CCV204		USGS		Geochemistry of rock samples from the National Geochemical Database: U.S. Geological Survey, Reston, VA.	U.S. Geological Survey	USGS		67.3183	-155.643	0.01				AAS	METAMORPHIC	UNKNOWN	UNKNOWN	MARBLE																												20
CCV204		USGS		Geochemistry of rock samples from the National Geochemical Database: U.S. Geological Survey, Reston, VA.	U.S. Geological Survey	USGS		67.3183	-155.643	0.01				ES	METAMORPHIC	UNKNOWN	UNKNOWN	MARBLE																						2	1000
CCV208		USGS		Geochemistry of rock samples from the National Geochemical Database: U.S. Geological Survey, Reston, VA.	U.S. Geological Survey	USGS		67.4125	-155.633	0.01				AAS	METAMORPHIC	UNKNOWN	UNKNOWN	MARBLE																												15
CCV208		USGS		Geochemistry of rock samples from the National Geochemical Database: U.S. Geological Survey, Reston, VA.	U.S. Geological Survey	USGS		67.4125	-155.633	0.01				ES	METAMORPHIC	UNKNOWN	UNKNOWN	MARBLE																						2	500
CCV214		USGS		Geochemistry of rock samples from the National Geochemical Database: U.S. Geological Survey, Reston, VA.	U.S. Geological Survey	USGS		67.4694	-155.512	0.01				AAS	METAMORPHIC	UNKNOWN	UNKNOWN	MARBLE																												10
CCV214		USGS		Geochemistry of rock samples from the National Geochemical Database: U.S. Geological Survey, Reston, VA.	U.S. Geological Survey	USGS		67.4694	-155.512	0.01				ES	METAMORPHIC	UNKNOWN	UNKNOWN	MARBLE																						1.5	1000
CCV220		USGS		Geochemistry of rock samples from the National Geochemical Database: U.S. Geological Survey, Reston, VA.	U.S. Geological Survey	USGS		67.4244	-155.976	0.01				AAS	METAMORPHIC	UNKNOWN	UNKNOWN	MARBLE																												45
CCV220		USGS		Geochemistry of rock samples from the National Geochemical Database: U.S. Geological Survey, Reston, VA.	U.S. Geological Survey	USGS		67.4244	-155.976	0.01				ES	METAMORPHIC	UNKNOWN	UNKNOWN	MARBLE																						5	1000	20		10
CCV222		USGS		Geochemistry of rock samples from the National Geochemical Database: U.S. Geological Survey, Reston, VA.	U.S. Geological Survey	USGS		67.4828	-155.829	0.01				AAS	METAMORPHIC	UNKNOWN	UNKNOWN	MARBLE																												10
CCV222		USGS		Geochemistry of rock samples from the National Geochemical Database: U.S. Geological Survey, Reston, VA.	U.S. Geological Survey	USGS		67.4828	-155.829	0.01				ES	METAMORPHIC	UNKNOWN	UNKNOWN	MARBLE																						0.5	100
CCV245		USGS		Geochemistry of rock samples from the National Geochemical Database: U.S. Geological Survey, Reston, VA.	U.S. Geological Survey	USGS		67.1125	-155.397	0.01				AAS	METAMORPHIC	UNKNOWN	UNKNOWN	MARBLE																												65
CCV245		USGS		Geochemistry of rock samples from the National Geochemical Database: U.S. Geological Survey, Reston, VA.	U.S. Geological Survey	USGS		67.1125	-155.397	0.01				ES	METAMORPHIC	UNKNOWN	UNKNOWN	MARBLE																						7	700	70	20	50		200
CCV260		USGS		Geochemistry of rock samples from the National Geochemical Database: U.S. Geological Survey, Reston, VA.	U.S. Geological Survey	USGS		67.0542	-155.463	0.01				AAS	METAMORPHIC	UNKNOWN	UNKNOWN	MARBLE																												5
CCV260		USGS		Geochemistry of rock samples from the National Geochemical Database: U.S. Geological Survey, Reston, VA.	U.S. Geological Survey	USGS		67.0542	-155.463	0.01				ES	METAMORPHIC	UNKNOWN	UNKNOWN	MARBLE																						0.2	200			20
CCV269		USGS		Geochemistry of rock samples from the National Geochemical Database: U.S. Geological Survey, Reston, VA.	U.S. Geological Survey	USGS		67.1586	-154.447	0.01				AAS	METAMORPHIC	UNKNOWN	UNKNOWN	MARBLE																												5
CCV269		USGS		Geochemistry of rock samples from the National Geochemical Database: U.S. Geological Survey, Reston, VA.	U.S. Geological Survey	USGS		67.1586	-154.447	0.01				ES	METAMORPHIC	UNKNOWN	UNKNOWN	MARBLE																						0.2	50
CCV270		USGS		Geochemistry of rock samples from the National Geochemical Database: U.S. Geological Survey, Reston, VA.	U.S. Geological Survey	USGS		67.1875	-154.532	0.01				AAS	METAMORPHIC	UNKNOWN	UNKNOWN	MARBLE																												30
CCV270		USGS		Geochemistry of rock samples from the National Geochemical Database: U.S. Geological Survey, Reston, VA.	U.S. Geological Survey	USGS		67.1875	-154.532	0.01				ES	METAMORPHIC	UNKNOWN	UNKNOWN	MARBLE																						5	1000	15	10
CCV396		USGS		Geochemistry of rock samples from the National Geochemical Database: U.S. Geological Survey, Reston, VA.	U.S. Geological Survey	USGS		67.1264	-155.499	0.01				AAS	METAMORPHIC	UNKNOWN	UNKNOWN	MARBLE																												15
CCV396		USGS		Geochemistry of rock samples from the National Geochemical Database: U.S. Geological Survey, Reston, VA.	U.S. Geological Survey	USGS		67.1264	-155.499	0.01				ES	METAMORPHIC	UNKNOWN	UNKNOWN	MARBLE																						15	1000	150
CCV406		USGS		Geochemistry of rock samples from the National Geochemical Database: U.S. Geological Survey, Reston, VA.	U.S. Geological Survey	USGS		67.2069	-155.958	0.01				AAS	METAMORPHIC	UNKNOWN	UNKNOWN	MARBLE																												25
CCV406		USGS		Geochemistry of rock samples from the National Geochemical Database: U.S. Geological Survey, Reston, VA.	U.S. Geological Survey	USGS		67.2069	-155.958	0.01				ES	METAMORPHIC	UNKNOWN	UNKNOWN	MARBLE																						0.2	500
CCV414		USGS		Geochemistry of rock samples from the National Geochemical Database: U.S. Geological Survey, Reston, VA.	U.S. Geological Survey	USGS		67.2308	-154.77	0.01				AAS	METAMORPHIC	UNKNOWN	UNKNOWN	MARBLE																												5
CCV414		USGS		Geochemistry of rock samples from the National Geochemical Database: U.S. Geological Survey, Reston, VA.	U.S. Geological Survey	USGS		67.2308	-154.77	0.01				ES	METAMORPHIC	UNKNOWN	UNKNOWN	MARBLE																						0.7	500
CCV419		USGS		Geochemistry of rock samples from the National Geochemical Database: U.S. Geological Survey, Reston, VA.	U.S. Geological Survey	USGS		67.2494	-154.667	0.01				AAS	METAMORPHIC	UNKNOWN	UNKNOWN	MARBLE																												5
CCV419		USGS		Geochemistry of rock samples from the National Geochemical Database: U.S. Geological Survey, Reston, VA.	U.S. Geological Survey	USGS		67.2494	-154.667	0.01				ES	METAMORPHIC	UNKNOWN	UNKNOWN	MARBLE																						0.3	500
CCV426		USGS		Geochemistry of rock samples from the National Geochemical Database: U.S. Geological Survey, Reston, VA.	U.S. Geological Survey	USGS		67.4758	-155.949	0.01				AAS	METAMORPHIC	UNKNOWN	UNKNOWN	MARBLE																												20
CCV426		USGS		Geochemistry of rock samples from the National Geochemical Database: U.S. Geological Survey, Reston, VA.	U.S. Geological Survey	USGS		67.4758	-155.949	0.01				ES	METAMORPHIC	UNKNOWN	UNKNOWN	MARBLE																						2	200
CCV428		USGS		Geochemistry of rock samples from the National Geochemical Database: U.S. Geological Survey, Reston, VA.	U.S. Geological Survey	USGS		67.4708	-155.917	0.01				AAS	METAMORPHIC	UNKNOWN	UNKNOWN	MARBLE																												10
CCV428		USGS		Geochemistry of rock samples from the National Geochemical Database: U.S. Geological Survey, Reston, VA.	U.S. Geological Survey	USGS		67.4708	-155.917	0.01				ES	METAMORPHIC	UNKNOWN	UNKNOWN	MARBLE																						0.5	50
CCV442		USGS		Geochemistry of rock samples from the National Geochemical Database: U.S. Geological Survey, Reston, VA.	U.S. Geological Survey	USGS		67.4972	-154.758	0.01				AAS	METAMORPHIC	UNKNOWN	UNKNOWN	MARBLE																												10
CCV442		USGS		Geochemistry of rock samples from the National Geochemical Database: U.S. Geological Survey, Reston, VA.	U.S. Geological Survey	USGS		67.4972	-154.758	0.01				ES	METAMORPHIC	UNKNOWN	UNKNOWN	MARBLE																						2	700	70
CCV449		USGS		Geochemistry of rock samples from the National Geochemical Database: U.S. Geological Survey, Reston, VA.	U.S. Geological Survey	USGS		67.5894	-154.719	0.01				AAS	METAMORPHIC	UNKNOWN	UNKNOWN	MARBLE																												75
CCV449		USGS		Geochemistry of rock samples from the National Geochemical Database: U.S. Geological Survey, Reston, VA.	U.S. Geological Survey	USGS		67.5894	-154.719	0.01				ES	METAMORPHIC	UNKNOWN	UNKNOWN	MARBLE																						10	2000	150	70
CCV450		USGS		Geochemistry of rock samples from the National Geochemical Database: U.S. Geological Survey, Reston, VA.	U.S. Geological Survey	USGS		67.5806	-154.606	0.01				AAS	METAMORPHIC	UNKNOWN	UNKNOWN	MARBLE																												10
CCV450		USGS		Geochemistry of rock samples from the National Geochemical Database: U.S. Geological Survey, Reston, VA.	U.S. Geological Survey	USGS		67.5806	-154.606	0.01				ES	METAMORPHIC	UNKNOWN	UNKNOWN	MARBLE																						0.15	100
CCV452		USGS		Geochemistry of rock samples from the National Geochemical Database: U.S. Geological Survey, Reston, VA.	U.S. Geological Survey	USGS		67.6069	-154.583	0.01				AAS	METAMORPHIC	UNKNOWN	UNKNOWN	MARBLE																												15
CCV452		USGS		Geochemistry of rock samples from the National Geochemical Database: U.S. Geological Survey, Reston, VA.	U.S. Geological Survey	USGS		67.6069	-154.583	0.01				ES	METAMORPHIC	UNKNOWN	UNKNOWN	MARBLE																						2	300
CCV456		USGS		Geochemistry of rock samples from the National Geochemical Database: U.S. Geological Survey, Reston, VA.	U.S. Geological Survey	USGS		67.2569	-154.782	0.01				AAS	METAMORPHIC	UNKNOWN	UNKNOWN	MARBLE																												20
CCV456		USGS		Geochemistry of rock samples from the National Geochemical Database: U.S. Geological Survey, Reston, VA.	U.S. Geological Survey	USGS		67.2569	-154.782	0.01				ES	METAMORPHIC	UNKNOWN	UNKNOWN	MARBLE																						0.5	300
CCV461		USGS		Geochemistry of rock samples from the National Geochemical Database: U.S. Geological Survey, Reston, VA.	U.S. Geological Survey	USGS		67.1675	-154.436	0.01				AAS	METAMORPHIC	UNKNOWN	UNKNOWN	MARBLE																												10
CCV461		USGS		Geochemistry of rock samples from the National Geochemical Database: U.S. Geological Survey, Reston, VA.	U.S. Geological Survey	USGS		67.1675	-154.436	0.01				ES	METAMORPHIC	UNKNOWN	UNKNOWN	MARBLE																						0.1	20
CCV462		USGS		Geochemistry of rock samples from the National Geochemical Database: U.S. Geological Survey, Reston, VA.	U.S. Geological Survey	USGS		67.1675	-154.436	0.01				AAS	METAMORPHIC	UNKNOWN	UNKNOWN	MARBLE																												20
CCV462		USGS		Geochemistry of rock samples from the National Geochemical Database: U.S. Geological Survey, Reston, VA.	U.S. Geological Survey	USGS		67.1675	-154.436	0.01				ES	METAMORPHIC	UNKNOWN	UNKNOWN	MARBLE																						2	200	30		10
CCV463		USGS		Geochemistry of rock samples from the National Geochemical Database: U.S. Geological Survey, Reston, VA.	U.S. Geological Survey	USGS		67.1675	-154.436	0.01				AAS	METAMORPHIC	UNKNOWN	UNKNOWN	MARBLE																												60
CCV463		USGS		Geochemistry of rock samples from the National Geochemical Database: U.S. Geological Survey, Reston, VA.	U.S. Geological Survey	USGS		67.1675	-154.436	0.01				ES	METAMORPHIC	UNKNOWN	UNKNOWN	MARBLE																						10	300	100	50	150
CCV472		USGS		Geochemistry of rock samples from the National Geochemical Database: U.S. Geological Survey, Reston, VA.	U.S. Geological Survey	USGS		67.6222	-154.219	0.01				AAS	METAMORPHIC	UNKNOWN	UNKNOWN	MARBLE																												25
CCV472		USGS		Geochemistry of rock samples from the National Geochemical Database: U.S. Geological Survey, Reston, VA.	U.S. Geological Survey	USGS		67.6222	-154.219	0.01				ES	METAMORPHIC	UNKNOWN	UNKNOWN	MARBLE																						3	700	20		15				2
CCV473		USGS		Geochemistry of rock samples from the National Geochemical Database: U.S. Geological Survey, Reston, VA.	U.S. Geological Survey	USGS		67.5569	-154.018	0.01				AAS	METAMORPHIC	UNKNOWN	UNKNOWN	MARBLE																												10
CCV473		USGS		Geochemistry of rock samples from the National Geochemical Database: U.S. Geological Survey, Reston, VA.	U.S. Geological Survey	USGS		67.5569	-154.018	0.01				ES	METAMORPHIC	UNKNOWN	UNKNOWN	MARBLE																						0.05	200
CCV475		USGS		Geochemistry of rock samples from the National Geochemical Database: U.S. Geological Survey, Reston, VA.	U.S. Geological Survey	USGS		67.6028	-153.891	0.01				AAS	METAMORPHIC	UNKNOWN	UNKNOWN	MARBLE																												10
CCV475		USGS		Geochemistry of rock samples from the National Geochemical Database: U.S. Geological Survey, Reston, VA.	U.S. Geological Survey	USGS		67.6028	-153.891	0.01				ES	METAMORPHIC	UNKNOWN	UNKNOWN	MARBLE																						0.5	100
CCV489		USGS		Geochemistry of rock samples from the National Geochemical Database: U.S. Geological Survey, Reston, VA.	U.S. Geological Survey	USGS		67.1467	-154.525	0.01				AAS	METAMORPHIC	UNKNOWN	UNKNOWN	MARBLE																												5
CCV489		USGS		Geochemistry of rock samples from the National Geochemical Database: U.S. Geological Survey, Reston, VA.	U.S. Geological Survey	USGS		67.1467	-154.525	0.01				ES	METAMORPHIC	UNKNOWN	UNKNOWN	MARBLE																						1	100
CCV492		USGS		Geochemistry of rock samples from the National Geochemical Database: U.S. Geological Survey, Reston, VA.	U.S. Geological Survey	USGS		67.1508	-154.522	0.01				AAS	METAMORPHIC	UNKNOWN	UNKNOWN	MARBLE																												10
CCV492		USGS		Geochemistry of rock samples from the National Geochemical Database: U.S. Geological Survey, Reston, VA.	U.S. Geological Survey	USGS		67.1508	-154.522	0.01				ES	METAMORPHIC	UNKNOWN	UNKNOWN	MARBLE																						2	700	20
CCV496		USGS		Geochemistry of rock samples from the National Geochemical Database: U.S. Geological Survey, Reston, VA.	U.S. Geological Survey	USGS		67.1686	-154.549	0.01				AAS	METAMORPHIC	UNKNOWN	UNKNOWN	MARBLE																												10
CCV496		USGS		Geochemistry of rock samples from the National Geochemical Database: U.S. Geological Survey, Reston, VA.	U.S. Geological Survey	USGS		67.1686	-154.549	0.01				ES	METAMORPHIC	UNKNOWN	UNKNOWN	MARBLE																						0.1	20	10
CCV498		USGS		Geochemistry of rock samples from the National Geochemical Database: U.S. Geological Survey, Reston, VA.	U.S. Geological Survey	USGS		67.1736	-154.547	0.01				AAS	METAMORPHIC	UNKNOWN	UNKNOWN	MARBLE																												5
CCV498		USGS		Geochemistry of rock samples from the National Geochemical Database: U.S. Geological Survey, Reston, VA.	U.S. Geological Survey	USGS		67.1736	-154.547	0.01				ES	METAMORPHIC	UNKNOWN	UNKNOWN	MARBLE																						0.5	70
CCV499		USGS		Geochemistry of rock samples from the National Geochemical Database: U.S. Geological Survey, Reston, VA.	U.S. Geological Survey	USGS		67.2278	-154.649	0.01				AAS	METAMORPHIC	UNKNOWN	UNKNOWN	MARBLE																												5
CCV499		USGS		Geochemistry of rock samples from the National Geochemical Database: U.S. Geological Survey, Reston, VA.	U.S. Geological Survey	USGS		67.2278	-154.649	0.01				ES	METAMORPHIC	UNKNOWN	UNKNOWN	MARBLE																						0.5	300
CCV511		USGS		Geochemistry of rock samples from the National Geochemical Database: U.S. Geological Survey, Reston, VA.	U.S. Geological Survey	USGS		67.2042	-154.711	0.01				AAS	METAMORPHIC	UNKNOWN	UNKNOWN	MARBLE																												5
CCV511		USGS		Geochemistry of rock samples from the National Geochemical Database: U.S. Geological Survey, Reston, VA.	U.S. Geological Survey	USGS		67.2042	-154.711	0.01				ES	METAMORPHIC	UNKNOWN	UNKNOWN	MARBLE																						0.5	100
CCV515		USGS		Geochemistry of rock samples from the National Geochemical Database: U.S. Geological Survey, Reston, VA.	U.S. Geological Survey	USGS		67.1978	-154.711	0.01				AAS	METAMORPHIC	UNKNOWN	UNKNOWN	MARBLE																												10
CCV515		USGS		Geochemistry of rock samples from the National Geochemical Database: U.S. Geological Survey, Reston, VA.	U.S. Geological Survey	USGS		67.1978	-154.711	0.01				ES	METAMORPHIC	UNKNOWN	UNKNOWN	MARBLE																						2	700
CCV516		USGS		Geochemistry of rock samples from the National Geochemical Database: U.S. Geological Survey, Reston, VA.	U.S. Geological Survey	USGS		67.1978	-154.711	0.01				AAS	METAMORPHIC	UNKNOWN	UNKNOWN	MARBLE																												10
CCV516		USGS		Geochemistry of rock samples from the National Geochemical Database: U.S. Geological Survey, Reston, VA.	U.S. Geological Survey	USGS		67.1978	-154.711	0.01				ES	METAMORPHIC	UNKNOWN	UNKNOWN	MARBLE																						1	500	10
CCV518		USGS		Geochemistry of rock samples from the National Geochemical Database: U.S. Geological Survey, Reston, VA.	U.S. Geological Survey	USGS		67.1889	-154.713	0.01				AAS	METAMORPHIC	UNKNOWN	UNKNOWN	MARBLE																												10
CCV518		USGS		Geochemistry of rock samples from the National Geochemical Database: U.S. Geological Survey, Reston, VA.	U.S. Geological Survey	USGS		67.1889	-154.713	0.01				ES	METAMORPHIC	UNKNOWN	UNKNOWN	MARBLE																						5	700	15	10	10
CCV520		USGS		Geochemistry of rock samples from the National Geochemical Database: U.S. Geological Survey, Reston, VA.	U.S. Geological Survey	USGS		67.6139	-154.885	0.01				AAS	METAMORPHIC	UNKNOWN	UNKNOWN	MARBLE																												10
CCV520		USGS		Geochemistry of rock samples from the National Geochemical Database: U.S. Geological Survey, Reston, VA.	U.S. Geological Survey	USGS		67.6139	-154.885	0.01				ES	METAMORPHIC	UNKNOWN	UNKNOWN	MARBLE																						3	500	15		10
CCV531		USGS		Geochemistry of rock samples from the National Geochemical Database: U.S. Geological Survey, Reston, VA.	U.S. Geological Survey	USGS		67.5203	-155.236	0.01				AAS	METAMORPHIC	UNKNOWN	UNKNOWN	MARBLE																												25
CCV531		USGS		Geochemistry of rock samples from the National Geochemical Database: U.S. Geological Survey, Reston, VA.	U.S. Geological Survey	USGS		67.5203	-155.236	0.01				ES	METAMORPHIC	UNKNOWN	UNKNOWN	MARBLE																						2	2000
CCV533		USGS		Geochemistry of rock samples from the National Geochemical Database: U.S. Geological Survey, Reston, VA.	U.S. Geological Survey	USGS		67.4369	-155.608	0.01				AAS	METAMORPHIC	UNKNOWN	UNKNOWN	MARBLE																												15
CCV533		USGS		Geochemistry of rock samples from the National Geochemical Database: U.S. Geological Survey, Reston, VA.	U.S. Geological Survey	USGS		67.4369	-155.608	0.01				ES	METAMORPHIC	UNKNOWN	UNKNOWN	MARBLE																						5	1000			20
CCV536		USGS		Geochemistry of rock samples from the National Geochemical Database: U.S. Geological Survey, Reston, VA.	U.S. Geological Survey	USGS		67.3611	-155.792	0.01				AAS	METAMORPHIC	UNKNOWN	UNKNOWN	MARBLE																												5
CCV536		USGS		Geochemistry of rock samples from the National Geochemical Database: U.S. Geological Survey, Reston, VA.	U.S. Geological Survey	USGS		67.3611	-155.792	0.01				ES	METAMORPHIC	UNKNOWN	UNKNOWN	MARBLE																						0.3	150		70
CCV540		USGS		Geochemistry of rock samples from the National Geochemical Database: U.S. Geological Survey, Reston, VA.	U.S. Geological Survey	USGS		67.3153	-155.946	0.01				AAS	METAMORPHIC	UNKNOWN	UNKNOWN	MARBLE																												20
CCV540		USGS		Geochemistry of rock samples from the National Geochemical Database: U.S. Geological Survey, Reston, VA.	U.S. Geological Survey	USGS		67.3153	-155.946	0.01				ES	METAMORPHIC	UNKNOWN	UNKNOWN	MARBLE																						5	500		20
CCV542		USGS		Geochemistry of rock samples from the National Geochemical Database: U.S. Geological Survey, Reston, VA.	U.S. Geological Survey	USGS		67.1042	-153.581	0.01				AAS	METAMORPHIC	UNKNOWN	UNKNOWN	MARBLE																												10
CCV542		USGS		Geochemistry of rock samples from the National Geochemical Database: U.S. Geological Survey, Reston, VA.	U.S. Geological Survey	USGS		67.1042	-153.581	0.01				ES	METAMORPHIC	UNKNOWN	UNKNOWN	MARBLE																						0.7	700		100
CCV546		USGS		Geochemistry of rock samples from the National Geochemical Database: U.S. Geological Survey, Reston, VA.	U.S. Geological Survey	USGS		67.1739	-153.819	0.01				AAS	METAMORPHIC	UNKNOWN	UNKNOWN	MARBLE																												20
CCV546		USGS		Geochemistry of rock samples from the National Geochemical Database: U.S. Geological Survey, Reston, VA.	U.S. Geological Survey	USGS		67.1739	-153.819	0.01				ES	METAMORPHIC	UNKNOWN	UNKNOWN	MARBLE																						3	300	15	50
CCV551		USGS		Geochemistry of rock samples from the National Geochemical Database: U.S. Geological Survey, Reston, VA.	U.S. Geological Survey	USGS		67.2264	-153.8	0.01				AAS	METAMORPHIC	UNKNOWN	UNKNOWN	MARBLE																												25
CCV551		USGS		Geochemistry of rock samples from the National Geochemical Database: U.S. Geological Survey, Reston, VA.	U.S. Geological Survey	USGS		67.2264	-153.8	0.01				ES	METAMORPHIC	UNKNOWN	UNKNOWN	MARBLE																						5	500	15	20
CCV608		USGS		Geochemistry of rock samples from the National Geochemical Database: U.S. Geological Survey, Reston, VA.	U.S. Geological Survey	USGS		67.4617	-155.727	0.01				AAS	METAMORPHIC	UNKNOWN	UNKNOWN	MARBLE																												10
CCV608		USGS		Geochemistry of rock samples from the National Geochemical Database: U.S. Geological Survey, Reston, VA.	U.S. Geological Survey	USGS		67.4617	-155.727	0.01				ES	METAMORPHIC	UNKNOWN	UNKNOWN	MARBLE																						0.2	200
CCV635		USGS		Geochemistry of rock samples from the National Geochemical Database: U.S. Geological Survey, Reston, VA.	U.S. Geological Survey	USGS		67.4561	-155.147	0.01				AAS	METAMORPHIC	UNKNOWN	UNKNOWN	MARBLE																												5
CCV635		USGS		Geochemistry of rock samples from the National Geochemical Database: U.S. Geological Survey, Reston, VA.	U.S. Geological Survey	USGS		67.4561	-155.147	0.01				ES	METAMORPHIC	UNKNOWN	UNKNOWN	MARBLE																						1	200	10
CCV643		USGS		Geochemistry of rock samples from the National Geochemical Database: U.S. Geological Survey, Reston, VA.	U.S. Geological Survey	USGS		67.1003	-155.875	0.01				AAS	METAMORPHIC	UNKNOWN	UNKNOWN	MARBLE																												80
CCV643		USGS		Geochemistry of rock samples from the National Geochemical Database: U.S. Geological Survey, Reston, VA.	U.S. Geological Survey	USGS		67.1003	-155.875	0.01				ES	METAMORPHIC	UNKNOWN	UNKNOWN	MARBLE																						10	1500	50	50	100
CCV700		USGS		Geochemistry of rock samples from the National Geochemical Database: U.S. Geological Survey, Reston, VA.	U.S. Geological Survey	USGS		67.2694	-155.871	0.01				AAS	METAMORPHIC	UNKNOWN	UNKNOWN	MARBLE																												5
CCV700		USGS		Geochemistry of rock samples from the National Geochemical Database: U.S. Geological Survey, Reston, VA.	U.S. Geological Survey	USGS		67.2694	-155.871	0.01				ES	METAMORPHIC	UNKNOWN	UNKNOWN	MARBLE																						0.5	200
CCV701		USGS		Geochemistry of rock samples from the National Geochemical Database: U.S. Geological Survey, Reston, VA.	U.S. Geological Survey	USGS		67.2694	-155.871	0.01				AAS	METAMORPHIC	UNKNOWN	UNKNOWN	MARBLE																												35
CCV701		USGS		Geochemistry of rock samples from the National Geochemical Database: U.S. Geological Survey, Reston, VA.	U.S. Geological Survey	USGS		67.2694	-155.871	0.01				ES	METAMORPHIC	UNKNOWN	UNKNOWN	MARBLE																						7	500	30	30	15
CCV710		USGS		Geochemistry of rock samples from the National Geochemical Database: U.S. Geological Survey, Reston, VA.	U.S. Geological Survey	USGS		67.3889	-155.986	0.01				AAS	METAMORPHIC	UNKNOWN	UNKNOWN	MARBLE																												35
CCV710		USGS		Geochemistry of rock samples from the National Geochemical Database: U.S. Geological Survey, Reston, VA.	U.S. Geological Survey	USGS		67.3889	-155.986	0.01				ES	METAMORPHIC	UNKNOWN	UNKNOWN	MARBLE																						2	1500			10
CCV723		USGS		Geochemistry of rock samples from the National Geochemical Database: U.S. Geological Survey, Reston, VA.	U.S. Geological Survey	USGS		67.5528	-155.061	0.01				AAS	METAMORPHIC	UNKNOWN	UNKNOWN	MARBLE																												300
CCV723		USGS		Geochemistry of rock samples from the National Geochemical Database: U.S. Geological Survey, Reston, VA.	U.S. Geological Survey	USGS		67.5528	-155.061	0.01				ES	METAMORPHIC	UNKNOWN	UNKNOWN	MARBLE																						2	500	100	10	70		300
CCV761		USGS		Geochemistry of rock samples from the National Geochemical Database: U.S. Geological Survey, Reston, VA.	U.S. Geological Survey	USGS		67.2031	-154.251	0.01				AAS	METAMORPHIC	UNKNOWN	UNKNOWN	MARBLE																												15
CCV761		USGS		Geochemistry of rock samples from the National Geochemical Database: U.S. Geological Survey, Reston, VA.	U.S. Geological Survey	USGS		67.2031	-154.251	0.01				ES	METAMORPHIC	UNKNOWN	UNKNOWN	MARBLE																						2	300			5
CCV814		USGS		Geochemistry of rock samples from the National Geochemical Database: U.S. Geological Survey, Reston, VA.	U.S. Geological Survey	USGS		67.2017	-154.564	0.01				AAS	METAMORPHIC	UNKNOWN	UNKNOWN	MARBLE																												15
CCV814		USGS		Geochemistry of rock samples from the National Geochemical Database: U.S. Geological Survey, Reston, VA.	U.S. Geological Survey	USGS		67.2017	-154.564	0.01				ES	METAMORPHIC	UNKNOWN	UNKNOWN	MARBLE																						2	500	10
CCV858		USGS		Geochemistry of rock samples from the National Geochemical Database: U.S. Geological Survey, Reston, VA.	U.S. Geological Survey	USGS		68.3333	-158.5	0.01				AAS	METAMORPHIC	UNKNOWN	UNKNOWN	MARBLE																												5
CCV858		USGS		Geochemistry of rock samples from the National Geochemical Database: U.S. Geological Survey, Reston, VA.	U.S. Geological Survey	USGS		68.3333	-158.5	0.01				ES	METAMORPHIC	UNKNOWN	UNKNOWN	MARBLE																						0.2	100
CCV923		USGS		Geochemistry of rock samples from the National Geochemical Database: U.S. Geological Survey, Reston, VA.	U.S. Geological Survey	USGS		67.1425	-154.951	0.01				AAS	METAMORPHIC	UNKNOWN	UNKNOWN	MARBLE																												5
CCV923		USGS		Geochemistry of rock samples from the National Geochemical Database: U.S. Geological Survey, Reston, VA.	U.S. Geological Survey	USGS		67.1425	-154.951	0.01				ES	METAMORPHIC	UNKNOWN	UNKNOWN	MARBLE																							20
CCV924		USGS		Geochemistry of rock samples from the National Geochemical Database: U.S. Geological Survey, Reston, VA.	U.S. Geological Survey	USGS		67.1425	-154.951	0.01				AAS	METAMORPHIC	UNKNOWN	UNKNOWN	MARBLE																												5
CCV924		USGS		Geochemistry of rock samples from the National Geochemical Database: U.S. Geological Survey, Reston, VA.	U.S. Geological Survey	USGS		67.1425	-154.951	0.01				ES	METAMORPHIC	UNKNOWN	UNKNOWN	MARBLE																						0.5	150
CCV925		USGS		Geochemistry of rock samples from the National Geochemical Database: U.S. Geological Survey, Reston, VA.	U.S. Geological Survey	USGS		67.1506	-154.956	0.01				AAS	METAMORPHIC	UNKNOWN	UNKNOWN	MARBLE																												5
CCV925		USGS		Geochemistry of rock samples from the National Geochemical Database: U.S. Geological Survey, Reston, VA.	U.S. Geological Survey	USGS		67.1506	-154.956	0.01				ES	METAMORPHIC	UNKNOWN	UNKNOWN	MARBLE																						0.5	150
CCV926		USGS		Geochemistry of rock samples from the National Geochemical Database: U.S. Geological Survey, Reston, VA.	U.S. Geological Survey	USGS		67.1506	-157.956	0.01				AAS	METAMORPHIC	UNKNOWN	UNKNOWN	MARBLE																												10
CCV926		USGS		Geochemistry of rock samples from the National Geochemical Database: U.S. Geological Survey, Reston, VA.	U.S. Geological Survey	USGS		67.1506	-157.956	0.01				ES	METAMORPHIC	UNKNOWN	UNKNOWN	MARBLE																						2	200
CCW151		USGS		Geochemistry of rock samples from the National Geochemical Database: U.S. Geological Survey, Reston, VA.	U.S. Geological Survey	USGS		67.6017	-153.271	0.01				AAS	METAMORPHIC	UNKNOWN	UNKNOWN	MARBLE																												44000
CCW151		USGS		Geochemistry of rock samples from the National Geochemical Database: U.S. Geological Survey, Reston, VA.	U.S. Geological Survey	USGS		67.6017	-153.271	0.01				ES	METAMORPHIC	UNKNOWN	UNKNOWN	MARBLE																						3	300	10		10	300
CCW155		USGS		Geochemistry of rock samples from the National Geochemical Database: U.S. Geological Survey, Reston, VA.	U.S. Geological Survey	USGS		67.1361	-155.121	0.01				AAS	METAMORPHIC	UNKNOWN	UNKNOWN	MARBLE																												10
CCW155		USGS		Geochemistry of rock samples from the National Geochemical Database: U.S. Geological Survey, Reston, VA.	U.S. Geological Survey	USGS		67.1361	-155.121	0.01				ES	METAMORPHIC	UNKNOWN	UNKNOWN	MARBLE																						0.5	200
CCW156		USGS		Geochemistry of rock samples from the National Geochemical Database: U.S. Geological Survey, Reston, VA.	U.S. Geological Survey	USGS		67.1361	-155.121	0.01				AAS	METAMORPHIC	UNKNOWN	UNKNOWN	MARBLE																												10
CCW156		USGS		Geochemistry of rock samples from the National Geochemical Database: U.S. Geological Survey, Reston, VA.	U.S. Geological Survey	USGS		67.1361	-155.121	0.01				ES	METAMORPHIC	UNKNOWN	UNKNOWN	MARBLE																						2	500	10
CCW158		USGS		Geochemistry of rock samples from the National Geochemical Database: U.S. Geological Survey, Reston, VA.	U.S. Geological Survey	USGS		67.148	-154.562	0.01				AAS	METAMORPHIC	UNKNOWN	UNKNOWN	MARBLE																												30
CCW158		USGS		Geochemistry of rock samples from the National Geochemical Database: U.S. Geological Survey, Reston, VA.	U.S. Geological Survey	USGS		67.148	-154.562	0.01				ES	METAMORPHIC	UNKNOWN	UNKNOWN	MARBLE																						10	1000	20	20
CCW159		USGS		Geochemistry of rock samples from the National Geochemical Database: U.S. Geological Survey, Reston, VA.	U.S. Geological Survey	USGS		67.148	-154.562	0.01				AAS	METAMORPHIC	UNKNOWN	UNKNOWN	MARBLE																												25
CCW159		USGS		Geochemistry of rock samples from the National Geochemical Database: U.S. Geological Survey, Reston, VA.	U.S. Geological Survey	USGS		67.148	-154.562	0.01				ES	METAMORPHIC	UNKNOWN	UNKNOWN	MARBLE																						3	300
CCW167		USGS		Geochemistry of rock samples from the National Geochemical Database: U.S. Geological Survey, Reston, VA.	U.S. Geological Survey	USGS		67.1194	-155.533	0.01				ES	METAMORPHIC	UNKNOWN	UNKNOWN	MARBLE																						0.2	20
CCW171		USGS		Geochemistry of rock samples from the National Geochemical Database: U.S. Geological Survey, Reston, VA.	U.S. Geological Survey	USGS		67.1694	-155.283	0.01				AAS	METAMORPHIC	UNKNOWN	UNKNOWN	MARBLE																												5
CCW171		USGS		Geochemistry of rock samples from the National Geochemical Database: U.S. Geological Survey, Reston, VA.	U.S. Geological Survey	USGS		67.1694	-155.283	0.01				ES	METAMORPHIC	UNKNOWN	UNKNOWN	MARBLE																						0.2	50
CCW177		USGS		Geochemistry of rock samples from the National Geochemical Database: U.S. Geological Survey, Reston, VA.	U.S. Geological Survey	USGS		67.2314	-155.774	0.01				AAS	METAMORPHIC	UNKNOWN	UNKNOWN	MARBLE																												40
CCW177		USGS		Geochemistry of rock samples from the National Geochemical Database: U.S. Geological Survey, Reston, VA.	U.S. Geological Survey	USGS		67.2314	-155.774	0.01				ES	METAMORPHIC	UNKNOWN	UNKNOWN	MARBLE																						7	200	10		10
CCW188		USGS		Geochemistry of rock samples from the National Geochemical Database: U.S. Geological Survey, Reston, VA.	U.S. Geological Survey	USGS		67.2356	-154.817	0.01				ES	METAMORPHIC	UNKNOWN	UNKNOWN	MARBLE																						0.05	70
CCW191		USGS		Geochemistry of rock samples from the National Geochemical Database: U.S. Geological Survey, Reston, VA.	U.S. Geological Survey	USGS		67.2569	-154.864	0.01				AAS	METAMORPHIC	UNKNOWN	UNKNOWN	MARBLE																												10
CCW191		USGS		Geochemistry of rock samples from the National Geochemical Database: U.S. Geological Survey, Reston, VA.	U.S. Geological Survey	USGS		67.2569	-154.864	0.01				ES	METAMORPHIC	UNKNOWN	UNKNOWN	MARBLE																						1
CCW199		USGS		Geochemistry of rock samples from the National Geochemical Database: U.S. Geological Survey, Reston, VA.	U.S. Geological Survey	USGS		67.5833	-155.808	0.01				AAS	METAMORPHIC	UNKNOWN	UNKNOWN	MARBLE																												15
CCW199		USGS		Geochemistry of rock samples from the National Geochemical Database: U.S. Geological Survey, Reston, VA.	U.S. Geological Survey	USGS		67.5833	-155.808	0.01				ES	METAMORPHIC	UNKNOWN	UNKNOWN	MARBLE																						1.5	200	10		5
CCW201		USGS		Geochemistry of rock samples from the National Geochemical Database: U.S. Geological Survey, Reston, VA.	U.S. Geological Survey	USGS		67.5889	-155.654	0.01				AAS	METAMORPHIC	UNKNOWN	UNKNOWN	MARBLE																												10
CCW201		USGS		Geochemistry of rock samples from the National Geochemical Database: U.S. Geological Survey, Reston, VA.	U.S. Geological Survey	USGS		67.5889	-155.654	0.01				ES	METAMORPHIC	UNKNOWN	UNKNOWN	MARBLE																						3	500	15		7
CCW208		USGS		Geochemistry of rock samples from the National Geochemical Database: U.S. Geological Survey, Reston, VA.	U.S. Geological Survey	USGS		67.4319	-155.387	0.01				AAS	METAMORPHIC	UNKNOWN	UNKNOWN	MARBLE																												10
CCW208		USGS		Geochemistry of rock samples from the National Geochemical Database: U.S. Geological Survey, Reston, VA.	U.S. Geological Survey	USGS		67.4319	-155.387	0.01				ES	METAMORPHIC	UNKNOWN	UNKNOWN	MARBLE																						2	700
CCW221		USGS		Geochemistry of rock samples from the National Geochemical Database: U.S. Geological Survey, Reston, VA.	U.S. Geological Survey	USGS		67.6139	-154.844	0.01				AAS	METAMORPHIC	UNKNOWN	UNKNOWN	MARBLE																												5
CCW221		USGS		Geochemistry of rock samples from the National Geochemical Database: U.S. Geological Survey, Reston, VA.	U.S. Geological Survey	USGS		67.6139	-154.844	0.01				ES	METAMORPHIC	UNKNOWN	UNKNOWN	MARBLE																						0.5	100
CCX847		USGS		Geochemistry of rock samples from the National Geochemical Database: U.S. Geological Survey, Reston, VA.	U.S. Geological Survey	USGS		57.6483	-135.612	0.01				AAS	METAMORPHIC	UNKNOWN	UNKNOWN	MARBLE																										5		20
CCX847		USGS		Geochemistry of rock samples from the National Geochemical Database: U.S. Geological Survey, Reston, VA.	U.S. Geological Survey	USGS		57.6483	-135.612	0.01				ES	METAMORPHIC	UNKNOWN	UNKNOWN	MARBLE																						0.2	1000	5
CCX848		USGS		Geochemistry of rock samples from the National Geochemical Database: U.S. Geological Survey, Reston, VA.	U.S. Geological Survey	USGS		57.6483	-135.612	0.01				AAS	METAMORPHIC	UNKNOWN	UNKNOWN	MARBLE																										5		15
CCX848		USGS		Geochemistry of rock samples from the National Geochemical Database: U.S. Geological Survey, Reston, VA.	U.S. Geological Survey	USGS		57.6483	-135.612	0.01				ES	METAMORPHIC	UNKNOWN	UNKNOWN	MARBLE																						0.3	1500	5
CCX865		USGS		Geochemistry of rock samples from the National Geochemical Database: U.S. Geological Survey, Reston, VA.	U.S. Geological Survey	USGS		57.7403	-136.2	0.01				AAS	METAMORPHIC	UNKNOWN	UNKNOWN	MARBLE																												5
CCX865		USGS		Geochemistry of rock samples from the National Geochemical Database: U.S. Geological Survey, Reston, VA.	U.S. Geological Survey	USGS		57.7403	-136.2	0.01				ES	METAMORPHIC	UNKNOWN	UNKNOWN	MARBLE																						0.5	700
CCX866		USGS		Geochemistry of rock samples from the National Geochemical Database: U.S. Geological Survey, Reston, VA.	U.S. Geological Survey	USGS		57.7403	-136.2	0.01				AAS	METAMORPHIC	UNKNOWN	UNKNOWN	MARBLE																												5
CCX866		USGS		Geochemistry of rock samples from the National Geochemical Database: U.S. Geological Survey, Reston, VA.	U.S. Geological Survey	USGS		57.7403	-136.2	0.01				ES	METAMORPHIC	UNKNOWN	UNKNOWN	MARBLE																						0.5	700
CCY716		USGS		Geochemistry of rock samples from the National Geochemical Database: U.S. Geological Survey, Reston, VA.	U.S. Geological Survey	USGS		56.5861	-132.205	0.01				AAS	METAMORPHIC	UNKNOWN	UNKNOWN	MARBLE																										5		10
CCY716		USGS		Geochemistry of rock samples from the National Geochemical Database: U.S. Geological Survey, Reston, VA.	U.S. Geological Survey	USGS		56.5861	-132.205	0.01				ES	METAMORPHIC	UNKNOWN	UNKNOWN	MARBLE																						0.5	1000	5
CCY828		USGS		Geochemistry of rock samples from the National Geochemical Database: U.S. Geological Survey, Reston, VA.	U.S. Geological Survey	USGS		56.5508	-132.145	0.01				AAS	METAMORPHIC	UNKNOWN	UNKNOWN	MARBLE																												5
CCY828		USGS		Geochemistry of rock samples from the National Geochemical Database: U.S. Geological Survey, Reston, VA.	U.S. Geological Survey	USGS		56.5508	-132.145	0.01				ES	METAMORPHIC	UNKNOWN	UNKNOWN	MARBLE																						0.5	200	5
CCY832		USGS		Geochemistry of rock samples from the National Geochemical Database: U.S. Geological Survey, Reston, VA.	U.S. Geological Survey	USGS		56.5642	-132.144	0.01				AAS	METAMORPHIC	UNKNOWN	UNKNOWN	MARBLE																												10
CCY832		USGS		Geochemistry of rock samples from the National Geochemical Database: U.S. Geological Survey, Reston, VA.	U.S. Geological Survey	USGS		56.5642	-132.144	0.01				ES	METAMORPHIC	UNKNOWN	UNKNOWN	MARBLE																						0.2	50
CCY963		USGS		Geochemistry of rock samples from the National Geochemical Database: U.S. Geological Survey, Reston, VA.	U.S. Geological Survey	USGS		56.3933	-132.018	0.01				AAS	METAMORPHIC	UNKNOWN	UNKNOWN	MARBLE																										10		25
CCY963		USGS		Geochemistry of rock samples from the National Geochemical Database: U.S. Geological Survey, Reston, VA.	U.S. Geological Survey	USGS		56.3933	-132.018	0.01				ES	METAMORPHIC	UNKNOWN	UNKNOWN	MARBLE																						0.1	50	5
CCY964		USGS		Geochemistry of rock samples from the National Geochemical Database: U.S. Geological Survey, Reston, VA.	U.S. Geological Survey	USGS		56.3933	-132.018	0.01				AAS	METAMORPHIC	UNKNOWN	UNKNOWN	MARBLE																										10		30
CCY964		USGS		Geochemistry of rock samples from the National Geochemical Database: U.S. Geological Survey, Reston, VA.	U.S. Geological Survey	USGS		56.3933	-132.018	0.01				ES	METAMORPHIC	UNKNOWN	UNKNOWN	MARBLE																						0.1	50	5
CCY968		USGS		Geochemistry of rock samples from the National Geochemical Database: U.S. Geological Survey, Reston, VA.	U.S. Geological Survey	USGS		56.4347	-132.105	0.01				AAS	METAMORPHIC	UNKNOWN	UNKNOWN	MARBLE																												15
CCY968		USGS		Geochemistry of rock samples from the National Geochemical Database: U.S. Geological Survey, Reston, VA.	U.S. Geological Survey	USGS		56.4347	-132.105	0.01				ES	METAMORPHIC	UNKNOWN	UNKNOWN	MARBLE																						0.1	700	5
CCZ057		USGS		Geochemistry of rock samples from the National Geochemical Database: U.S. Geological Survey, Reston, VA.	U.S. Geological Survey	USGS		56.3989	-132.028	0.01				AAS	METAMORPHIC	UNKNOWN	UNKNOWN	MARBLE																												10
CCZ057		USGS		Geochemistry of rock samples from the National Geochemical Database: U.S. Geological Survey, Reston, VA.	U.S. Geological Survey	USGS		56.3989	-132.028	0.01				COL	METAMORPHIC	UNKNOWN	UNKNOWN	MARBLE
CCZ057		USGS		Geochemistry of rock samples from the National Geochemical Database: U.S. Geological Survey, Reston, VA.	U.S. Geological Survey	USGS		56.3989	-132.028	0.01				ES	METAMORPHIC	UNKNOWN	UNKNOWN	MARBLE																						0.5	700	10
CCZ058		USGS		Geochemistry of rock samples from the National Geochemical Database: U.S. Geological Survey, Reston, VA.	U.S. Geological Survey	USGS		56.3978	-132.032	0.01				AAS	METAMORPHIC	UNKNOWN	UNKNOWN	MARBLE																												25
CCZ058		USGS		Geochemistry of rock samples from the National Geochemical Database: U.S. Geological Survey, Reston, VA.	U.S. Geological Survey	USGS		56.3978	-132.032	0.01				ES	METAMORPHIC	UNKNOWN	UNKNOWN	MARBLE																						0.3	2000	5
CCZ118		USGS		Geochemistry of rock samples from the National Geochemical Database: U.S. Geological Survey, Reston, VA.	U.S. Geological Survey	USGS		56.4992	-132.183	0.01				AAS	METAMORPHIC	UNKNOWN	UNKNOWN	MARBLE																										5		10
CCZ118		USGS		Geochemistry of rock samples from the National Geochemical Database: U.S. Geological Survey, Reston, VA.	U.S. Geological Survey	USGS		56.4992	-132.183	0.01				ES	METAMORPHIC	UNKNOWN	UNKNOWN	MARBLE																						0.1	100
CCZ119		USGS		Geochemistry of rock samples from the National Geochemical Database: U.S. Geological Survey, Reston, VA.	U.S. Geological Survey	USGS		56.4992	-132.183	0.01				AAS	METAMORPHIC	UNKNOWN	UNKNOWN	MARBLE																										5		10
CCZ119		USGS		Geochemistry of rock samples from the National Geochemical Database: U.S. Geological Survey, Reston, VA.	U.S. Geological Survey	USGS		56.4992	-132.183	0.01				ES	METAMORPHIC	UNKNOWN	UNKNOWN	MARBLE																						0.1	70
CCZ122		USGS		Geochemistry of rock samples from the National Geochemical Database: U.S. Geological Survey, Reston, VA.	U.S. Geological Survey	USGS		56.4992	-132.183	0.01				AAS	METAMORPHIC	UNKNOWN	UNKNOWN	MARBLE																										10		95
CCZ122		USGS		Geochemistry of rock samples from the National Geochemical Database: U.S. Geological Survey, Reston, VA.	U.S. Geological Survey	USGS		56.4992	-132.183	0.01				ES	METAMORPHIC	UNKNOWN	UNKNOWN	MARBLE																						0.5	1000	10
CCZ141		USGS		Geochemistry of rock samples from the National Geochemical Database: U.S. Geological Survey, Reston, VA.	U.S. Geological Survey	USGS		56.4375	-132.131	0.01				AAS	METAMORPHIC	UNKNOWN	UNKNOWN	MARBLE																										5		15
CCZ141		USGS		Geochemistry of rock samples from the National Geochemical Database: U.S. Geological Survey, Reston, VA.	U.S. Geological Survey	USGS		56.4375	-132.131	0.01				ES	METAMORPHIC	UNKNOWN	UNKNOWN	MARBLE																						2	1000	10	10
CCZ348		USGS		Geochemistry of rock samples from the National Geochemical Database: U.S. Geological Survey, Reston, VA.	U.S. Geological Survey	USGS		56.4189	-132.952	0.01				AAS	METAMORPHIC	UNKNOWN	UNKNOWN	MARBLE																										15		95
CCZ348		USGS		Geochemistry of rock samples from the National Geochemical Database: U.S. Geological Survey, Reston, VA.	U.S. Geological Survey	USGS		56.4189	-132.952	0.01				ES	METAMORPHIC	UNKNOWN	UNKNOWN	MARBLE																						2	1000	20		15				0.5
CDA092		USGS		Geochemistry of rock samples from the National Geochemical Database: U.S. Geological Survey, Reston, VA.	U.S. Geological Survey	USGS		56.1725	-133.421	0.01				AAS	METAMORPHIC	UNKNOWN	UNKNOWN	MARBLE																										5
CCZ695		USGS		Geochemistry of rock samples from the National Geochemical Database: U.S. Geological Survey, Reston, VA.	U.S. Geological Survey	USGS		56.7942	-133.362	0.01				AAS	METAMORPHIC	UNKNOWN	UNKNOWN	MARBLE																												30
CCZ695		USGS		Geochemistry of rock samples from the National Geochemical Database: U.S. Geological Survey, Reston, VA.	U.S. Geological Survey	USGS		56.7942	-133.362	0.01				ES	METAMORPHIC	UNKNOWN	UNKNOWN	MARBLE																						0.5	1000
CCZ702		USGS		Geochemistry of rock samples from the National Geochemical Database: U.S. Geological Survey, Reston, VA.	U.S. Geological Survey	USGS		56.565	-133.032	0.01				AAS	METAMORPHIC	UNKNOWN	UNKNOWN	MARBLE																										10		15
CCZ702		USGS		Geochemistry of rock samples from the National Geochemical Database: U.S. Geological Survey, Reston, VA.	U.S. Geological Survey	USGS		56.565	-133.032	0.01				ES	METAMORPHIC	UNKNOWN	UNKNOWN	MARBLE																						1	1000	15		7
CDA083		USGS		Geochemistry of rock samples from the National Geochemical Database: U.S. Geological Survey, Reston, VA.	U.S. Geological Survey	USGS		56.1519	-133.455	0.01				ES	METAMORPHIC	UNKNOWN	UNKNOWN	MARBLE																						0.05	50
CDA092		USGS		Geochemistry of rock samples from the National Geochemical Database: U.S. Geological Survey, Reston, VA.	U.S. Geological Survey	USGS		56.1725	-133.421	0.01				ES	METAMORPHIC	UNKNOWN	UNKNOWN	MARBLE																						0.05	50
CDA100		USGS		Geochemistry of rock samples from the National Geochemical Database: U.S. Geological Survey, Reston, VA.	U.S. Geological Survey	USGS		56.3367	-133.521	0.01				AAS	METAMORPHIC	UNKNOWN	UNKNOWN	MARBLE																												10
CDA100		USGS		Geochemistry of rock samples from the National Geochemical Database: U.S. Geological Survey, Reston, VA.	U.S. Geological Survey	USGS		56.3367	-133.521	0.01				ES	METAMORPHIC	UNKNOWN	UNKNOWN	MARBLE																						0.05	100			5
CDA133		USGS		Geochemistry of rock samples from the National Geochemical Database: U.S. Geological Survey, Reston, VA.	U.S. Geological Survey	USGS		56.0911	-133.504	0.01				AAS	METAMORPHIC	UNKNOWN	UNKNOWN	MARBLE																										10		50
CDA133		USGS		Geochemistry of rock samples from the National Geochemical Database: U.S. Geological Survey, Reston, VA.	U.S. Geological Survey	USGS		56.0911	-133.504	0.01				ES	METAMORPHIC	UNKNOWN	UNKNOWN	MARBLE																						2	700	10	10	7
CDA142		USGS		Geochemistry of rock samples from the National Geochemical Database: U.S. Geological Survey, Reston, VA.	U.S. Geological Survey	USGS		56.1786	-133.472	0.01				ES	METAMORPHIC	UNKNOWN	UNKNOWN	MARBLE																						0.07	300
CDA149		USGS		Geochemistry of rock samples from the National Geochemical Database: U.S. Geological Survey, Reston, VA.	U.S. Geological Survey	USGS		56.2625	-133.344	0.01				AAS	METAMORPHIC	UNKNOWN	UNKNOWN	MARBLE																										15		30
CDA149		USGS		Geochemistry of rock samples from the National Geochemical Database: U.S. Geological Survey, Reston, VA.	U.S. Geological Survey	USGS		56.2625	-133.344	0.01				ES	METAMORPHIC	UNKNOWN	UNKNOWN	MARBLE																							150
CDA171		USGS		Geochemistry of rock samples from the National Geochemical Database: U.S. Geological Survey, Reston, VA.	U.S. Geological Survey	USGS		56.0308	-133.722	0.01				ES	METAMORPHIC	UNKNOWN	UNKNOWN	MARBLE																							300
CDA172		USGS		Geochemistry of rock samples from the National Geochemical Database: U.S. Geological Survey, Reston, VA.	U.S. Geological Survey	USGS		56.0467	-133.705	0.01				AAS	METAMORPHIC	UNKNOWN	UNKNOWN	MARBLE																										5		10
CDA172		USGS		Geochemistry of rock samples from the National Geochemical Database: U.S. Geological Survey, Reston, VA.	U.S. Geological Survey	USGS		56.0467	-133.705	0.01				ES	METAMORPHIC	UNKNOWN	UNKNOWN	MARBLE																							300
CDA173		USGS		Geochemistry of rock samples from the National Geochemical Database: U.S. Geological Survey, Reston, VA.	U.S. Geological Survey	USGS		56.0714	-133.689	0.01				AAS	METAMORPHIC	UNKNOWN	UNKNOWN	MARBLE																												5
CDA173		USGS		Geochemistry of rock samples from the National Geochemical Database: U.S. Geological Survey, Reston, VA.	U.S. Geological Survey	USGS		56.0714	-133.689	0.01				ES	METAMORPHIC	UNKNOWN	UNKNOWN	MARBLE																							500
CDA174		USGS		Geochemistry of rock samples from the National Geochemical Database: U.S. Geological Survey, Reston, VA.	U.S. Geological Survey	USGS		56.0833	-133.658	0.01				AAS	METAMORPHIC	UNKNOWN	UNKNOWN	MARBLE																												25
CDA174		USGS		Geochemistry of rock samples from the National Geochemical Database: U.S. Geological Survey, Reston, VA.	U.S. Geological Survey	USGS		56.0833	-133.658	0.01				ES	METAMORPHIC	UNKNOWN	UNKNOWN	MARBLE																							200
CDA175		USGS		Geochemistry of rock samples from the National Geochemical Database: U.S. Geological Survey, Reston, VA.	U.S. Geological Survey	USGS		56.0855	-133.634	0.01				AAS	METAMORPHIC	UNKNOWN	UNKNOWN	MARBLE																												5
CDA175		USGS		Geochemistry of rock samples from the National Geochemical Database: U.S. Geological Survey, Reston, VA.	U.S. Geological Survey	USGS		56.0855	-133.634	0.01				ES	METAMORPHIC	UNKNOWN	UNKNOWN	MARBLE																							200
CDA176		USGS		Geochemistry of rock samples from the National Geochemical Database: U.S. Geological Survey, Reston, VA.	U.S. Geological Survey	USGS		56.0825	-133.598	0.01				AAS	METAMORPHIC	UNKNOWN	UNKNOWN	MARBLE																												5
CDA176		USGS		Geochemistry of rock samples from the National Geochemical Database: U.S. Geological Survey, Reston, VA.	U.S. Geological Survey	USGS		56.0825	-133.598	0.01				ES	METAMORPHIC	UNKNOWN	UNKNOWN	MARBLE																							200
CDA248		USGS		Geochemistry of rock samples from the National Geochemical Database: U.S. Geological Survey, Reston, VA.	U.S. Geological Survey	USGS		56.1653	-133.289	0.01				ES	METAMORPHIC	UNKNOWN	UNKNOWN	MARBLE																						0.2	700
CDA287		USGS		Geochemistry of rock samples from the National Geochemical Database: U.S. Geological Survey, Reston, VA.	U.S. Geological Survey	USGS		56.1836	-133.338	0.01				AAS	METAMORPHIC	UNKNOWN	UNKNOWN	MARBLE																										5
CDA287		USGS		Geochemistry of rock samples from the National Geochemical Database: U.S. Geological Survey, Reston, VA.	U.S. Geological Survey	USGS		56.1836	-133.338	0.01				ES	METAMORPHIC	UNKNOWN	UNKNOWN	MARBLE																						0.15	300
CDA358		USGS		Geochemistry of rock samples from the National Geochemical Database: U.S. Geological Survey, Reston, VA.	U.S. Geological Survey	USGS		56.3286	-133.174	0.01				AAS	METAMORPHIC	UNKNOWN	UNKNOWN	MARBLE																										25		20
CDA358		USGS		Geochemistry of rock samples from the National Geochemical Database: U.S. Geological Survey, Reston, VA.	U.S. Geological Survey	USGS		56.3286	-133.174	0.01				ES	METAMORPHIC	UNKNOWN	UNKNOWN	MARBLE																						10	5000	70	30	50
CDA405		USGS		Geochemistry of rock samples from the National Geochemical Database: U.S. Geological Survey, Reston, VA.	U.S. Geological Survey	USGS		56.2064	-133.434	0.01				AAS	METAMORPHIC	UNKNOWN	UNKNOWN	MARBLE																												10
CDA405		USGS		Geochemistry of rock samples from the National Geochemical Database: U.S. Geological Survey, Reston, VA.	U.S. Geological Survey	USGS		56.2064	-133.434	0.01				ES	METAMORPHIC	UNKNOWN	UNKNOWN	MARBLE																							50
CDA601		USGS		Geochemistry of rock samples from the National Geochemical Database: U.S. Geological Survey, Reston, VA.	U.S. Geological Survey	USGS		56.1644	-133.351	0.01				AAS	METAMORPHIC	UNKNOWN	UNKNOWN	MARBLE																										10		5
CDA601		USGS		Geochemistry of rock samples from the National Geochemical Database: U.S. Geological Survey, Reston, VA.	U.S. Geological Survey	USGS		56.1644	-133.351	0.01				ES	METAMORPHIC	UNKNOWN	UNKNOWN	MARBLE																						0.2	700
CDA633		USGS		Geochemistry of rock samples from the National Geochemical Database: U.S. Geological Survey, Reston, VA.	U.S. Geological Survey	USGS		56.1894	-133.364	0.01				AAS	METAMORPHIC	UNKNOWN	UNKNOWN	MARBLE																												10
CDA633		USGS		Geochemistry of rock samples from the National Geochemical Database: U.S. Geological Survey, Reston, VA.	U.S. Geological Survey	USGS		56.1894	-133.364	0.01				ES	METAMORPHIC	UNKNOWN	UNKNOWN	MARBLE																						0.15	300
CDA659		USGS		Geochemistry of rock samples from the National Geochemical Database: U.S. Geological Survey, Reston, VA.	U.S. Geological Survey	USGS		56.1778	-133.473	0.01				AAS	METAMORPHIC	UNKNOWN	UNKNOWN	MARBLE																										5		5
CDA659		USGS		Geochemistry of rock samples from the National Geochemical Database: U.S. Geological Survey, Reston, VA.	U.S. Geological Survey	USGS		56.1778	-133.473	0.01				ES	METAMORPHIC	UNKNOWN	UNKNOWN	MARBLE																						0.2	200
CDA665		USGS		Geochemistry of rock samples from the National Geochemical Database: U.S. Geological Survey, Reston, VA.	U.S. Geological Survey	USGS		56.2633	-133.346	0.01				AAS	METAMORPHIC	UNKNOWN	UNKNOWN	MARBLE																										5		5
CDA665		USGS		Geochemistry of rock samples from the National Geochemical Database: U.S. Geological Survey, Reston, VA.	U.S. Geological Survey	USGS		56.2633	-133.346	0.01				ES	METAMORPHIC	UNKNOWN	UNKNOWN	MARBLE																						0.5	700
CDB006		USGS		Geochemistry of rock samples from the National Geochemical Database: U.S. Geological Survey, Reston, VA.	U.S. Geological Survey	USGS		58.7456	-134.523	0.01				AAS	METAMORPHIC	UNKNOWN	UNKNOWN	MARBLE																										5		15
CDB006		USGS		Geochemistry of rock samples from the National Geochemical Database: U.S. Geological Survey, Reston, VA.	U.S. Geological Survey	USGS		58.7456	-134.523	0.01				ES	METAMORPHIC	UNKNOWN	UNKNOWN	MARBLE																						0.2	300	5
CDB007		USGS		Geochemistry of rock samples from the National Geochemical Database: U.S. Geological Survey, Reston, VA.	U.S. Geological Survey	USGS		58.7456	-134.523	0.01				AAS	METAMORPHIC	UNKNOWN	UNKNOWN	MARBLE																										5		10
CDB007		USGS		Geochemistry of rock samples from the National Geochemical Database: U.S. Geological Survey, Reston, VA.	U.S. Geological Survey	USGS		58.7456	-134.523	0.01				ES	METAMORPHIC	UNKNOWN	UNKNOWN	MARBLE																						0.2	300	5
CDB256		USGS		Geochemistry of rock samples from the National Geochemical Database: U.S. Geological Survey, Reston, VA.	U.S. Geological Survey	USGS		58.5206	-134.621	0.01				AAS	METAMORPHIC	UNKNOWN	UNKNOWN	MARBLE																												15
CDB256		USGS		Geochemistry of rock samples from the National Geochemical Database: U.S. Geological Survey, Reston, VA.	U.S. Geological Survey	USGS		58.5206	-134.621	0.01				ES	METAMORPHIC	UNKNOWN	UNKNOWN	MARBLE																						0.1	100	5
CDB257		USGS		Geochemistry of rock samples from the National Geochemical Database: U.S. Geological Survey, Reston, VA.	U.S. Geological Survey	USGS		58.5206	-134.621	0.01				AAS	METAMORPHIC	UNKNOWN	UNKNOWN	MARBLE																												15
CDB257		USGS		Geochemistry of rock samples from the National Geochemical Database: U.S. Geological Survey, Reston, VA.	U.S. Geological Survey	USGS		58.5206	-134.621	0.01				ES	METAMORPHIC	UNKNOWN	UNKNOWN	MARBLE																						0.5	200	5
CDB276		USGS		Geochemistry of rock samples from the National Geochemical Database: U.S. Geological Survey, Reston, VA.	U.S. Geological Survey	USGS		58.5514	-134.708	0.01				AAS	METAMORPHIC	UNKNOWN	UNKNOWN	MARBLE																										10		30
CDB276		USGS		Geochemistry of rock samples from the National Geochemical Database: U.S. Geological Survey, Reston, VA.	U.S. Geological Survey	USGS		58.5514	-134.708	0.01				ES	METAMORPHIC	UNKNOWN	UNKNOWN	MARBLE																						1	500	70	15	20		200
CDB277		USGS		Geochemistry of rock samples from the National Geochemical Database: U.S. Geological Survey, Reston, VA.	U.S. Geological Survey	USGS		58.5514	-134.708	0.01				AAS	METAMORPHIC	UNKNOWN	UNKNOWN	MARBLE																										15		10
CDB277		USGS		Geochemistry of rock samples from the National Geochemical Database: U.S. Geological Survey, Reston, VA.	U.S. Geological Survey	USGS		58.5514	-134.708	0.01				ES	METAMORPHIC	UNKNOWN	UNKNOWN	MARBLE																						1	700	30	5	20
CDB470		USGS		Geochemistry of rock samples from the National Geochemical Database: U.S. Geological Survey, Reston, VA.	U.S. Geological Survey	USGS		58.6792	-134.676	0.01				AAS	METAMORPHIC	UNKNOWN	UNKNOWN	MARBLE																										10		10
CDB470		USGS		Geochemistry of rock samples from the National Geochemical Database: U.S. Geological Survey, Reston, VA.	U.S. Geological Survey	USGS		58.6792	-134.676	0.01				ES	METAMORPHIC	UNKNOWN	UNKNOWN	MARBLE																						1	150	20	5	10
CDB484		USGS		Geochemistry of rock samples from the National Geochemical Database: U.S. Geological Survey, Reston, VA.	U.S. Geological Survey	USGS		58.6033	-134.75	0.01				AAS	METAMORPHIC	UNKNOWN	UNKNOWN	MARBLE																										10		5
CDB484		USGS		Geochemistry of rock samples from the National Geochemical Database: U.S. Geological Survey, Reston, VA.	U.S. Geological Survey	USGS		58.6033	-134.75	0.01				ES	METAMORPHIC	UNKNOWN	UNKNOWN	MARBLE																						1	700	5	5	5
CDB499		USGS		Geochemistry of rock samples from the National Geochemical Database: U.S. Geological Survey, Reston, VA.	U.S. Geological Survey	USGS		58.7214	-134.856	0.01				AAS	METAMORPHIC	UNKNOWN	UNKNOWN	MARBLE																										5		15
CDB499		USGS		Geochemistry of rock samples from the National Geochemical Database: U.S. Geological Survey, Reston, VA.	U.S. Geological Survey	USGS		58.7214	-134.856	0.01				ES	METAMORPHIC	UNKNOWN	UNKNOWN	MARBLE																						0.7	1000	5
CDB630		USGS		Geochemistry of rock samples from the National Geochemical Database: U.S. Geological Survey, Reston, VA.	U.S. Geological Survey	USGS		58.7567	-134.798	0.01				AAS	METAMORPHIC	UNKNOWN	UNKNOWN	MARBLE																										10		5
CDB630		USGS		Geochemistry of rock samples from the National Geochemical Database: U.S. Geological Survey, Reston, VA.	U.S. Geological Survey	USGS		58.7567	-134.798	0.01				ES	METAMORPHIC	UNKNOWN	UNKNOWN	MARBLE																						2	700	10	7	7
CDB646		USGS		Geochemistry of rock samples from the National Geochemical Database: U.S. Geological Survey, Reston, VA.	U.S. Geological Survey	USGS		58.8225	-134.631	0.01				AAS	METAMORPHIC	UNKNOWN	UNKNOWN	MARBLE																												5
CDB646		USGS		Geochemistry of rock samples from the National Geochemical Database: U.S. Geological Survey, Reston, VA.	U.S. Geological Survey	USGS		58.8225	-134.631	0.01				ES	METAMORPHIC	UNKNOWN	UNKNOWN	MARBLE																						0.5	500
CDB674		USGS		Geochemistry of rock samples from the National Geochemical Database: U.S. Geological Survey, Reston, VA.	U.S. Geological Survey	USGS		58.7683	-134.907	0.01				AAS	METAMORPHIC	UNKNOWN	UNKNOWN	MARBLE																										5		5
CDB674		USGS		Geochemistry of rock samples from the National Geochemical Database: U.S. Geological Survey, Reston, VA.	U.S. Geological Survey	USGS		58.7683	-134.907	0.01				ES	METAMORPHIC	UNKNOWN	UNKNOWN	MARBLE																						0.5	200
CDB691		USGS		Geochemistry of rock samples from the National Geochemical Database: U.S. Geological Survey, Reston, VA.	U.S. Geological Survey	USGS		58.7564	-134.493	0.01				AAS	METAMORPHIC	UNKNOWN	UNKNOWN	MARBLE																										5		20
CDB691		USGS		Geochemistry of rock samples from the National Geochemical Database: U.S. Geological Survey, Reston, VA.	U.S. Geological Survey	USGS		58.7564	-134.493	0.01				ES	METAMORPHIC	UNKNOWN	UNKNOWN	MARBLE																						1	700
CDC139		USGS		Geochemistry of rock samples from the National Geochemical Database: U.S. Geological Survey, Reston, VA.	U.S. Geological Survey	USGS		57.6939	-136.005	0.01				AAS	METAMORPHIC	UNKNOWN	UNKNOWN	MARBLE																										5		10
CDC139		USGS		Geochemistry of rock samples from the National Geochemical Database: U.S. Geological Survey, Reston, VA.	U.S. Geological Survey	USGS		57.6939	-136.005	0.01				ES	METAMORPHIC	UNKNOWN	UNKNOWN	MARBLE																						0.05	70
CDC140		USGS		Geochemistry of rock samples from the National Geochemical Database: U.S. Geological Survey, Reston, VA.	U.S. Geological Survey	USGS		57.6939	-136.005	0.01				AAS	METAMORPHIC	UNKNOWN	UNKNOWN	MARBLE																										5		10
CDC140		USGS		Geochemistry of rock samples from the National Geochemical Database: U.S. Geological Survey, Reston, VA.	U.S. Geological Survey	USGS		57.6939	-136.005	0.01				ES	METAMORPHIC	UNKNOWN	UNKNOWN	MARBLE																						0.05	70
CDC479		USGS		Geochemistry of rock samples from the National Geochemical Database: U.S. Geological Survey, Reston, VA.	U.S. Geological Survey	USGS		57.7533	-136.206	0.01				AAS	METAMORPHIC	UNKNOWN	UNKNOWN	MARBLE																										5		5
CDC479		USGS		Geochemistry of rock samples from the National Geochemical Database: U.S. Geological Survey, Reston, VA.	U.S. Geological Survey	USGS		57.7533	-136.206	0.01				ES	METAMORPHIC	UNKNOWN	UNKNOWN	MARBLE																						0.1	150	5
CDC480		USGS		Geochemistry of rock samples from the National Geochemical Database: U.S. Geological Survey, Reston, VA.	U.S. Geological Survey	USGS		57.7533	-136.206	0.01				AAS	METAMORPHIC	UNKNOWN	UNKNOWN	MARBLE																										5		10
CDC480		USGS		Geochemistry of rock samples from the National Geochemical Database: U.S. Geological Survey, Reston, VA.	U.S. Geological Survey	USGS		57.7533	-136.206	0.01				ES	METAMORPHIC	UNKNOWN	UNKNOWN	MARBLE																						0.07	150	5
CDC499		USGS		Geochemistry of rock samples from the National Geochemical Database: U.S. Geological Survey, Reston, VA.	U.S. Geological Survey	USGS		57.7978	-136.224	0.01				AAS	METAMORPHIC	UNKNOWN	UNKNOWN	MARBLE																										5		10
CDC499		USGS		Geochemistry of rock samples from the National Geochemical Database: U.S. Geological Survey, Reston, VA.	U.S. Geological Survey	USGS		57.7978	-136.224	0.01				ES	METAMORPHIC	UNKNOWN	UNKNOWN	MARBLE																						0.1	300
CDC500		USGS		Geochemistry of rock samples from the National Geochemical Database: U.S. Geological Survey, Reston, VA.	U.S. Geological Survey	USGS		57.7978	-136.224	0.01				AAS	METAMORPHIC	UNKNOWN	UNKNOWN	MARBLE																										5		10
CDC500		USGS		Geochemistry of rock samples from the National Geochemical Database: U.S. Geological Survey, Reston, VA.	U.S. Geological Survey	USGS		57.7978	-136.224	0.01				ES	METAMORPHIC	UNKNOWN	UNKNOWN	MARBLE																						0.1	300	5
CDC652		USGS		Geochemistry of rock samples from the National Geochemical Database: U.S. Geological Survey, Reston, VA.	U.S. Geological Survey	USGS		57.6883	-135.982	0.01				AAS	METAMORPHIC	UNKNOWN	UNKNOWN	MARBLE																										10		15
CDC652		USGS		Geochemistry of rock samples from the National Geochemical Database: U.S. Geological Survey, Reston, VA.	U.S. Geological Survey	USGS		57.6883	-135.982	0.01				ES	METAMORPHIC	UNKNOWN	UNKNOWN	MARBLE																						0.7	200			10
CDC653		USGS		Geochemistry of rock samples from the National Geochemical Database: U.S. Geological Survey, Reston, VA.	U.S. Geological Survey	USGS		57.6883	-135.982	0.01				AAS	METAMORPHIC	UNKNOWN	UNKNOWN	MARBLE																										5		15
CDC653		USGS		Geochemistry of rock samples from the National Geochemical Database: U.S. Geological Survey, Reston, VA.	U.S. Geological Survey	USGS		57.6883	-135.982	0.01				ES	METAMORPHIC	UNKNOWN	UNKNOWN	MARBLE																						0.1	300
CDC654		USGS		Geochemistry of rock samples from the National Geochemical Database: U.S. Geological Survey, Reston, VA.	U.S. Geological Survey	USGS		57.6883	-135.982	0.01				AAS	METAMORPHIC	UNKNOWN	UNKNOWN	MARBLE																										65		80
CDC654		USGS		Geochemistry of rock samples from the National Geochemical Database: U.S. Geological Survey, Reston, VA.	U.S. Geological Survey	USGS		57.6883	-135.982	0.01				ES	METAMORPHIC	UNKNOWN	UNKNOWN	MARBLE																						5	2000	50	30	100
CDC655		USGS		Geochemistry of rock samples from the National Geochemical Database: U.S. Geological Survey, Reston, VA.	U.S. Geological Survey	USGS		57.6883	-135.982	0.01				AAS	METAMORPHIC	UNKNOWN	UNKNOWN	MARBLE																										35		55
CDC655		USGS		Geochemistry of rock samples from the National Geochemical Database: U.S. Geological Survey, Reston, VA.	U.S. Geological Survey	USGS		57.6883	-135.982	0.01				ES	METAMORPHIC	UNKNOWN	UNKNOWN	MARBLE																						5	2000	70	20	70
CDE329		USGS		Geochemistry of rock samples from the National Geochemical Database: U.S. Geological Survey, Reston, VA.	U.S. Geological Survey	USGS		56.4611	-133.861	0.01				AAS	METAMORPHIC	UNKNOWN	UNKNOWN	MARBLE																										110		80
CDE329		USGS		Geochemistry of rock samples from the National Geochemical Database: U.S. Geological Survey, Reston, VA.	U.S. Geological Survey	USGS		56.4611	-133.861	0.01				ES	METAMORPHIC	UNKNOWN	UNKNOWN	MARBLE																						0.5	200			5
CDE342		USGS		Geochemistry of rock samples from the National Geochemical Database: U.S. Geological Survey, Reston, VA.	U.S. Geological Survey	USGS		56.5911	-132.267	0.01				AAS	METAMORPHIC	UNKNOWN	UNKNOWN	MARBLE																										5		15
CDE342		USGS		Geochemistry of rock samples from the National Geochemical Database: U.S. Geological Survey, Reston, VA.	U.S. Geological Survey	USGS		56.5911	-132.267	0.01				ES	METAMORPHIC	UNKNOWN	UNKNOWN	MARBLE																						0.1	200
CDE378		USGS		Geochemistry of rock samples from the National Geochemical Database: U.S. Geological Survey, Reston, VA.	U.S. Geological Survey	USGS		56.5783	-132.194	0.01				AAS	METAMORPHIC	UNKNOWN	UNKNOWN	MARBLE																												15
CDE378		USGS		Geochemistry of rock samples from the National Geochemical Database: U.S. Geological Survey, Reston, VA.	U.S. Geological Survey	USGS		56.5783	-132.194	0.01				ES	METAMORPHIC	UNKNOWN	UNKNOWN	MARBLE																						2	500	70	5
CDE407		USGS		Geochemistry of rock samples from the National Geochemical Database: U.S. Geological Survey, Reston, VA.	U.S. Geological Survey	USGS		56.87	-133.334	0.01				AAS	METAMORPHIC	UNKNOWN	UNKNOWN	MARBLE																										5		45
CDE407		USGS		Geochemistry of rock samples from the National Geochemical Database: U.S. Geological Survey, Reston, VA.	U.S. Geological Survey	USGS		56.87	-133.334	0.01				ES	METAMORPHIC	UNKNOWN	UNKNOWN	MARBLE																						0.2	1500	5
CDF062		USGS		Geochemistry of rock samples from the National Geochemical Database: U.S. Geological Survey, Reston, VA.	U.S. Geological Survey	USGS		56.4269	-132.131	0.01				AAS	METAMORPHIC	UNKNOWN	UNKNOWN	MARBLE																										10		110
CDF062		USGS		Geochemistry of rock samples from the National Geochemical Database: U.S. Geological Survey, Reston, VA.	U.S. Geological Survey	USGS		56.4269	-132.131	0.01				COL	METAMORPHIC	UNKNOWN	UNKNOWN	MARBLE
CDF062		USGS		Geochemistry of rock samples from the National Geochemical Database: U.S. Geological Survey, Reston, VA.	U.S. Geological Survey	USGS		56.4269	-132.131	0.01				ES	METAMORPHIC	UNKNOWN	UNKNOWN	MARBLE																						10	2000	30	50	100
CDF229		USGS		Geochemistry of rock samples from the National Geochemical Database: U.S. Geological Survey, Reston, VA.	U.S. Geological Survey	USGS		56.4678	-132.511	0.01				AAS	METAMORPHIC	UNKNOWN	UNKNOWN	MARBLE																										30		65
CDF229		USGS		Geochemistry of rock samples from the National Geochemical Database: U.S. Geological Survey, Reston, VA.	U.S. Geological Survey	USGS		56.4678	-132.511	0.01				ES	METAMORPHIC	UNKNOWN	UNKNOWN	MARBLE																						5		50	50	50
CDF525		USGS		Geochemistry of rock samples from the National Geochemical Database: U.S. Geological Survey, Reston, VA.	U.S. Geological Survey	USGS		65.0444	-144.968	0.01				ES	METAMORPHIC	UNKNOWN	UNKNOWN	MARBLE																						2	300	10		10
CDF527		USGS		Geochemistry of rock samples from the National Geochemical Database: U.S. Geological Survey, Reston, VA.	U.S. Geological Survey	USGS		65.1139	-144.228	0.01				ES	METAMORPHIC	UNKNOWN	UNKNOWN	MARBLE																						1.5	300	10
CDF529		USGS		Geochemistry of rock samples from the National Geochemical Database: U.S. Geological Survey, Reston, VA.	U.S. Geological Survey	USGS		65.3075	-145.479	0.01				ES	METAMORPHIC	UNKNOWN	UNKNOWN	MARBLE																						1.5	2000			5
CDF530		USGS		Geochemistry of rock samples from the National Geochemical Database: U.S. Geological Survey, Reston, VA.	U.S. Geological Survey	USGS		65.0486	-144.744	0.01				ES	METAMORPHIC	UNKNOWN	UNKNOWN	MARBLE																						2	1500	15	15	100	100	7000		7
CDF535		USGS		Geochemistry of rock samples from the National Geochemical Database: U.S. Geological Survey, Reston, VA.	U.S. Geological Survey	USGS		65.0469	-144.75	0.01				ES	METAMORPHIC	UNKNOWN	UNKNOWN	MARBLE																						2	1000	10	10	10
CDH698		USGS		Geochemistry of rock samples from the National Geochemical Database: U.S. Geological Survey, Reston, VA.	U.S. Geological Survey	USGS		56.6122	-132.206	0.01				AAS	METAMORPHIC	UNKNOWN	UNKNOWN	MARBLE																												10
CDH698		USGS		Geochemistry of rock samples from the National Geochemical Database: U.S. Geological Survey, Reston, VA.	U.S. Geological Survey	USGS		56.6122	-132.206	0.01				ES	METAMORPHIC	UNKNOWN	UNKNOWN	MARBLE																						0.1	150
CDH699		USGS		Geochemistry of rock samples from the National Geochemical Database: U.S. Geological Survey, Reston, VA.	U.S. Geological Survey	USGS		56.6122	-132.206	0.01				AAS	METAMORPHIC	UNKNOWN	UNKNOWN	MARBLE																												5
CDH699		USGS		Geochemistry of rock samples from the National Geochemical Database: U.S. Geological Survey, Reston, VA.	U.S. Geological Survey	USGS		56.6122	-132.206	0.01				ES	METAMORPHIC	UNKNOWN	UNKNOWN	MARBLE																						0.1	150
CDL145		USGS		Geochemistry of rock samples from the National Geochemical Database: U.S. Geological Survey, Reston, VA.	U.S. Geological Survey	USGS		56.3958	-132.052	0.01				AAS	METAMORPHIC	UNKNOWN	UNKNOWN	MARBLE																												20
CDL145		USGS		Geochemistry of rock samples from the National Geochemical Database: U.S. Geological Survey, Reston, VA.	U.S. Geological Survey	USGS		56.3958	-132.052	0.01				ES	METAMORPHIC	UNKNOWN	UNKNOWN	MARBLE																						0.1	200	5
CDL146		USGS		Geochemistry of rock samples from the National Geochemical Database: U.S. Geological Survey, Reston, VA.	U.S. Geological Survey	USGS		56.3958	-132.052	0.01				AAS	METAMORPHIC	UNKNOWN	UNKNOWN	MARBLE																												5
CDL146		USGS		Geochemistry of rock samples from the National Geochemical Database: U.S. Geological Survey, Reston, VA.	U.S. Geological Survey	USGS		56.3958	-132.052	0.01				ES	METAMORPHIC	UNKNOWN	UNKNOWN	MARBLE																						0.05	200	5
CDX006		USGS		Geochemistry of rock samples from the National Geochemical Database: U.S. Geological Survey, Reston, VA.	U.S. Geological Survey	USGS		56.9119	-132.438	0.01				AAS	METAMORPHIC	UNKNOWN	UNKNOWN	MARBLE																										5		25
CDX006		USGS		Geochemistry of rock samples from the National Geochemical Database: U.S. Geological Survey, Reston, VA.	U.S. Geological Survey	USGS		56.9119	-132.438	0.01				ES	METAMORPHIC	UNKNOWN	UNKNOWN	MARBLE																						3	1500	50	15
CDX024		USGS		Geochemistry of rock samples from the National Geochemical Database: U.S. Geological Survey, Reston, VA.	U.S. Geological Survey	USGS		56.9	-132.579	0.01				AAS	METAMORPHIC	UNKNOWN	UNKNOWN	MARBLE																												1
CDX024		USGS		Geochemistry of rock samples from the National Geochemical Database: U.S. Geological Survey, Reston, VA.	U.S. Geological Survey	USGS		56.9	-132.579	0.01				ES	METAMORPHIC	UNKNOWN	UNKNOWN	MARBLE																							20
CDX082		USGS		Geochemistry of rock samples from the National Geochemical Database: U.S. Geological Survey, Reston, VA.	U.S. Geological Survey	USGS		56.9256	-132.347	0.01				AAS	METAMORPHIC	UNKNOWN	UNKNOWN	MARBLE																										5		15
CDX082		USGS		Geochemistry of rock samples from the National Geochemical Database: U.S. Geological Survey, Reston, VA.	U.S. Geological Survey	USGS		56.9256	-132.347	0.01				ES	METAMORPHIC	UNKNOWN	UNKNOWN	MARBLE																						0.5	200
CDY845		USGS		Geochemistry of rock samples from the National Geochemical Database: U.S. Geological Survey, Reston, VA.	U.S. Geological Survey	USGS		61.4569	-144.893	0.01				AAS	METAMORPHIC	UNKNOWN	UNKNOWN	MARBLE																										10		5
CDY845		USGS		Geochemistry of rock samples from the National Geochemical Database: U.S. Geological Survey, Reston, VA.	U.S. Geological Survey	USGS		61.4569	-144.893	0.01				ES	METAMORPHIC	UNKNOWN	UNKNOWN	MARBLE																						1	300	15	7	5
CDY849		USGS		Geochemistry of rock samples from the National Geochemical Database: U.S. Geological Survey, Reston, VA.	U.S. Geological Survey	USGS		61.4617	-144.888	0.01				AAS	METAMORPHIC	UNKNOWN	UNKNOWN	MARBLE																										5		5
CDY849		USGS		Geochemistry of rock samples from the National Geochemical Database: U.S. Geological Survey, Reston, VA.	U.S. Geological Survey	USGS		61.4617	-144.888	0.01				ES	METAMORPHIC	UNKNOWN	UNKNOWN	MARBLE																						0.15	150
CDY851		USGS		Geochemistry of rock samples from the National Geochemical Database: U.S. Geological Survey, Reston, VA.	U.S. Geological Survey	USGS		61.4656	-144.869	0.01				AAS	METAMORPHIC	UNKNOWN	UNKNOWN	MARBLE																										5		5
CDY851		USGS		Geochemistry of rock samples from the National Geochemical Database: U.S. Geological Survey, Reston, VA.	U.S. Geological Survey	USGS		61.4656	-144.869	0.01				ES	METAMORPHIC	UNKNOWN	UNKNOWN	MARBLE																						0.15	150
CEA618		USGS		Geochemistry of rock samples from the National Geochemical Database: U.S. Geological Survey, Reston, VA.	U.S. Geological Survey	USGS		65.0661	-144.54	0.01				ES	METAMORPHIC	UNKNOWN	UNKNOWN	MARBLE																						0.7	200
CEA671		USGS		Geochemistry of rock samples from the National Geochemical Database: U.S. Geological Survey, Reston, VA.	U.S. Geological Survey	USGS		65.1822	-144.468	0.01				ES	METAMORPHIC	UNKNOWN	UNKNOWN	MARBLE																						2	700	30	10
CEA673		USGS		Geochemistry of rock samples from the National Geochemical Database: U.S. Geological Survey, Reston, VA.	U.S. Geological Survey	USGS		65.1822	-144.468	0.01				ES	METAMORPHIC	UNKNOWN	UNKNOWN	MARBLE																						2	700	30	10
CEA674		USGS		Geochemistry of rock samples from the National Geochemical Database: U.S. Geological Survey, Reston, VA.	U.S. Geological Survey	USGS		65.1822	-144.468	0.01				ES	METAMORPHIC	UNKNOWN	UNKNOWN	MARBLE																						2	700	20	7
CEA676		USGS		Geochemistry of rock samples from the National Geochemical Database: U.S. Geological Survey, Reston, VA.	U.S. Geological Survey	USGS		65.1228	-144.205	0.01				ES	METAMORPHIC	UNKNOWN	UNKNOWN	MARBLE																						2	500	30	10	20
CEA677		USGS		Geochemistry of rock samples from the National Geochemical Database: U.S. Geological Survey, Reston, VA.	U.S. Geological Survey	USGS		65.1228	-144.205	0.01				ES	METAMORPHIC	UNKNOWN	UNKNOWN	MARBLE																						1	300	30	7	20
CEA679		USGS		Geochemistry of rock samples from the National Geochemical Database: U.S. Geological Survey, Reston, VA.	U.S. Geological Survey	USGS		65.1242	-144.208	0.01				ES	METAMORPHIC	UNKNOWN	UNKNOWN	MARBLE																						3	500	50	50
CEA680		USGS		Geochemistry of rock samples from the National Geochemical Database: U.S. Geological Survey, Reston, VA.	U.S. Geological Survey	USGS		65.1272	-144.214	0.01				ES	METAMORPHIC	UNKNOWN	UNKNOWN	MARBLE																						1.5	500	20	5
CEA684		USGS		Geochemistry of rock samples from the National Geochemical Database: U.S. Geological Survey, Reston, VA.	U.S. Geological Survey	USGS		65.1361	-144.229	0.01				ES	METAMORPHIC	UNKNOWN	UNKNOWN	MARBLE																						3	500	50	15	5
CEA720		USGS		Geochemistry of rock samples from the National Geochemical Database: U.S. Geological Survey, Reston, VA.	U.S. Geological Survey	USGS		65.5572	-146.481	0.01				ES	METAMORPHIC	UNKNOWN	UNKNOWN	MARBLE																						1.5	700	20	5	5
CEC603		USGS		Geochemistry of rock samples from the National Geochemical Database: U.S. Geological Survey, Reston, VA.	U.S. Geological Survey	USGS		65.2656	-144.119	0.01				ES	METAMORPHIC	UNKNOWN	UNKNOWN	MARBLE																						5	200	30	10	15
CEC616		USGS		Geochemistry of rock samples from the National Geochemical Database: U.S. Geological Survey, Reston, VA.	U.S. Geological Survey	USGS		65.2706	-144.051	0.01				ES	METAMORPHIC	UNKNOWN	UNKNOWN	MARBLE																						2	2000	7	7
CEC618		USGS		Geochemistry of rock samples from the National Geochemical Database: U.S. Geological Survey, Reston, VA.	U.S. Geological Survey	USGS		65.2608	-144.046	0.01				ES	METAMORPHIC	UNKNOWN	UNKNOWN	MARBLE																						3	3000	15	7
CEC622		USGS		Geochemistry of rock samples from the National Geochemical Database: U.S. Geological Survey, Reston, VA.	U.S. Geological Survey	USGS		65.2347	-144.051	0.01				ES	METAMORPHIC	UNKNOWN	UNKNOWN	MARBLE																						1.5	500			10
CEC656		USGS		Geochemistry of rock samples from the National Geochemical Database: U.S. Geological Survey, Reston, VA.	U.S. Geological Survey	USGS		65.2255	-144.086	0.01				ES	METAMORPHIC	UNKNOWN	UNKNOWN	MARBLE																						3	300	20	10	5
CEC661		USGS		Geochemistry of rock samples from the National Geochemical Database: U.S. Geological Survey, Reston, VA.	U.S. Geological Survey	USGS		65.2172	-144.058	0.01				ES	METAMORPHIC	UNKNOWN	UNKNOWN	MARBLE																						5	500	20	10
CEC668		USGS		Geochemistry of rock samples from the National Geochemical Database: U.S. Geological Survey, Reston, VA.	U.S. Geological Survey	USGS		65.2044	-144.412	0.01				ES	METAMORPHIC	UNKNOWN	UNKNOWN	MARBLE																						1.5	1000	5	5
CEC713		USGS		Geochemistry of rock samples from the National Geochemical Database: U.S. Geological Survey, Reston, VA.	U.S. Geological Survey	USGS		65.2453	-144.265	0.01				ES	METAMORPHIC	UNKNOWN	UNKNOWN	MARBLE																						2	500	30	10	100				0.7
CEC735		USGS		Geochemistry of rock samples from the National Geochemical Database: U.S. Geological Survey, Reston, VA.	U.S. Geological Survey	USGS		65.4625	-146.716	0.01				ES	METAMORPHIC	UNKNOWN	UNKNOWN	MARBLE																						1.5	1500	5	5
CEC736		USGS		Geochemistry of rock samples from the National Geochemical Database: U.S. Geological Survey, Reston, VA.	U.S. Geological Survey	USGS		65.4625	-146.716	0.01				ES	METAMORPHIC	UNKNOWN	UNKNOWN	MARBLE																						2	2000	5	5
CEC773		USGS		Geochemistry of rock samples from the National Geochemical Database: U.S. Geological Survey, Reston, VA.	U.S. Geological Survey	USGS		65.4447	-146.811	0.01				ES	METAMORPHIC	UNKNOWN	UNKNOWN	MARBLE																						1	200	15	5
CEC895		USGS		Geochemistry of rock samples from the National Geochemical Database: U.S. Geological Survey, Reston, VA.	U.S. Geological Survey	USGS		61.3014	-144.234	0.01				AAS	METAMORPHIC	UNKNOWN	UNKNOWN	MARBLE																										15		10
CEC895		USGS		Geochemistry of rock samples from the National Geochemical Database: U.S. Geological Survey, Reston, VA.	U.S. Geological Survey	USGS		61.3014	-144.234	0.01				ES	METAMORPHIC	UNKNOWN	UNKNOWN	MARBLE																							70
CED362		USGS		Geochemistry of rock samples from the National Geochemical Database: U.S. Geological Survey, Reston, VA.	U.S. Geological Survey	USGS		61.3583	-144.261	0.01				AAS	METAMORPHIC	UNKNOWN	UNKNOWN	MARBLE																										25		20
CED362		USGS		Geochemistry of rock samples from the National Geochemical Database: U.S. Geological Survey, Reston, VA.	U.S. Geological Survey	USGS		61.3583	-144.261	0.01				COL	METAMORPHIC	UNKNOWN	UNKNOWN	MARBLE																													10
CED362		USGS		Geochemistry of rock samples from the National Geochemical Database: U.S. Geological Survey, Reston, VA.	U.S. Geological Survey	USGS		61.3583	-144.261	0.01				ES	METAMORPHIC	UNKNOWN	UNKNOWN	MARBLE																						0.7	300	15	5	20
CEG235		USGS		Geochemistry of rock samples from the National Geochemical Database: U.S. Geological Survey, Reston, VA.	U.S. Geological Survey	USGS		56.2906	-134.296	0.01				AAS	METAMORPHIC	UNKNOWN	UNKNOWN	MARBLE																										60		25
CEG235		USGS		Geochemistry of rock samples from the National Geochemical Database: U.S. Geological Survey, Reston, VA.	U.S. Geological Survey	USGS		56.2906	-134.296	0.01				ES	METAMORPHIC	UNKNOWN	UNKNOWN	MARBLE																						3	300	20	15	30
CEG928		USGS		Geochemistry of rock samples from the National Geochemical Database: U.S. Geological Survey, Reston, VA.	U.S. Geological Survey	USGS		56.9236	-134.226	0.01				AAS	METAMORPHIC	UNKNOWN	UNKNOWN	MARBLE																												20
CEG928		USGS		Geochemistry of rock samples from the National Geochemical Database: U.S. Geological Survey, Reston, VA.	U.S. Geological Survey	USGS		56.9236	-134.226	0.01				ES	METAMORPHIC	UNKNOWN	UNKNOWN	MARBLE																						1.5	200
CEH427		USGS		Geochemistry of rock samples from the National Geochemical Database: U.S. Geological Survey, Reston, VA.	U.S. Geological Survey	USGS		57.1111	-133.863	0.01				AAS	METAMORPHIC	UNKNOWN	UNKNOWN	MARBLE																												5
CEH427		USGS		Geochemistry of rock samples from the National Geochemical Database: U.S. Geological Survey, Reston, VA.	U.S. Geological Survey	USGS		57.1111	-133.863	0.01				ES	METAMORPHIC	UNKNOWN	UNKNOWN	MARBLE																						0.2	150							0.5
CEJ669		USGS		Geochemistry of rock samples from the National Geochemical Database: U.S. Geological Survey, Reston, VA.	U.S. Geological Survey	USGS		65.4567	-145.868	0.01				ES	METAMORPHIC	UNKNOWN	UNKNOWN	MARBLE																						15		30	30	500		300	200
CEJ691		USGS		Geochemistry of rock samples from the National Geochemical Database: U.S. Geological Survey, Reston, VA.	U.S. Geological Survey	USGS		65.4478	-145.891	0.01				ES	METAMORPHIC	UNKNOWN	UNKNOWN	MARBLE																						1.5	1000	15	5	7
CEJ707		USGS		Geochemistry of rock samples from the National Geochemical Database: U.S. Geological Survey, Reston, VA.	U.S. Geological Survey	USGS		65.4592	-145.861	0.01				ES	METAMORPHIC	UNKNOWN	UNKNOWN	MARBLE																						7		30	20	30		300
CEJ708		USGS		Geochemistry of rock samples from the National Geochemical Database: U.S. Geological Survey, Reston, VA.	U.S. Geological Survey	USGS		65.4592	-145.861	0.01				ES	METAMORPHIC	UNKNOWN	UNKNOWN	MARBLE																						10		50	30	100		700
CEJ709		USGS		Geochemistry of rock samples from the National Geochemical Database: U.S. Geological Survey, Reston, VA.	U.S. Geological Survey	USGS		65.4592	-145.861	0.01				ES	METAMORPHIC	UNKNOWN	UNKNOWN	MARBLE																						5	5000	20	20	10		300
CEJ710		USGS		Geochemistry of rock samples from the National Geochemical Database: U.S. Geological Survey, Reston, VA.	U.S. Geological Survey	USGS		65.4592	-145.861	0.01				ES	METAMORPHIC	UNKNOWN	UNKNOWN	MARBLE																						1	500	5	5	10
CEJ714		USGS		Geochemistry of rock samples from the National Geochemical Database: U.S. Geological Survey, Reston, VA.	U.S. Geological Survey	USGS		65.4567	-145.868	0.01				ES	METAMORPHIC	UNKNOWN	UNKNOWN	MARBLE																						5	5000	50	20	100		300
CEJ715		USGS		Geochemistry of rock samples from the National Geochemical Database: U.S. Geological Survey, Reston, VA.	U.S. Geological Survey	USGS		65.4567	-145.868	0.01				ES	METAMORPHIC	UNKNOWN	UNKNOWN	MARBLE																						7		30	20	300		300
CEJ789		USGS		Geochemistry of rock samples from the National Geochemical Database: U.S. Geological Survey, Reston, VA.	U.S. Geological Survey	USGS		65.9103	-146.951	0.01				ES	METAMORPHIC	UNKNOWN	UNKNOWN	MARBLE																						5	500	200	70	50
CEN245		USGS		Geochemistry of rock samples from the National Geochemical Database: U.S. Geological Survey, Reston, VA.	U.S. Geological Survey	USGS		65.6964	-144.931	0.01				ES	METAMORPHIC	UNKNOWN	UNKNOWN	MARBLE																						3	2000	150	20	10
CEN246		USGS		Geochemistry of rock samples from the National Geochemical Database: U.S. Geological Survey, Reston, VA.	U.S. Geological Survey	USGS		65.7105	-144.667	0.01				ES	METAMORPHIC	UNKNOWN	UNKNOWN	MARBLE																						5	1500	300	50	100
CEP960		USGS		Geochemistry of rock samples from the National Geochemical Database: U.S. Geological Survey, Reston, VA.	U.S. Geological Survey	USGS		48.1853	-121.287	0.01				ES	METAMORPHIC	UNKNOWN	UNKNOWN	MARBLE																						1	300			7
CEP964		USGS		Geochemistry of rock samples from the National Geochemical Database: U.S. Geological Survey, Reston, VA.	U.S. Geological Survey	USGS		48.18	-121.281	0.01				ES	METAMORPHIC	UNKNOWN	UNKNOWN	MARBLE																						1	300			7
CEP966		USGS		Geochemistry of rock samples from the National Geochemical Database: U.S. Geological Survey, Reston, VA.	U.S. Geological Survey	USGS		48.1786	-121.277	0.01				ES	METAMORPHIC	UNKNOWN	UNKNOWN	MARBLE																						0.7	100			5
CER761		USGS		Geochemistry of rock samples from the National Geochemical Database: U.S. Geological Survey, Reston, VA.	U.S. Geological Survey	USGS		56.7878	-132.254	0.01				AAS	METAMORPHIC	UNKNOWN	UNKNOWN	MARBLE																										10		10
CER761		USGS		Geochemistry of rock samples from the National Geochemical Database: U.S. Geological Survey, Reston, VA.	U.S. Geological Survey	USGS		56.7878	-132.254	0.01				ES	METAMORPHIC	UNKNOWN	UNKNOWN	MARBLE																						0.1	200
CEX656		USGS		Geochemistry of rock samples from the National Geochemical Database: U.S. Geological Survey, Reston, VA.	U.S. Geological Survey	USGS		65.6139	-146.789	0.01				ES	METAMORPHIC	UNKNOWN	UNKNOWN	MARBLE																						5	500	20	20	30
CEX667		USGS		Geochemistry of rock samples from the National Geochemical Database: U.S. Geological Survey, Reston, VA.	U.S. Geological Survey	USGS		65.1944	-143.308	0.01				AAS	METAMORPHIC	UNKNOWN	UNKNOWN	MARBLE																												10
CEX667		USGS		Geochemistry of rock samples from the National Geochemical Database: U.S. Geological Survey, Reston, VA.	U.S. Geological Survey	USGS		65.1944	-143.308	0.01				ES	METAMORPHIC	UNKNOWN	UNKNOWN	MARBLE																						0.5	500	5	5
CEX685		USGS		Geochemistry of rock samples from the National Geochemical Database: U.S. Geological Survey, Reston, VA.	U.S. Geological Survey	USGS		65.1417	-143.969	0.01				AAS	METAMORPHIC	UNKNOWN	UNKNOWN	MARBLE																												10
CEX685		USGS		Geochemistry of rock samples from the National Geochemical Database: U.S. Geological Survey, Reston, VA.	U.S. Geological Survey	USGS		65.1417	-143.969	0.01				ES	METAMORPHIC	UNKNOWN	UNKNOWN	MARBLE																						0.5	200	7	5	5
CEX691		USGS		Geochemistry of rock samples from the National Geochemical Database: U.S. Geological Survey, Reston, VA.	U.S. Geological Survey	USGS		65.3389	-143.954	0.01				AAS	METAMORPHIC	UNKNOWN	UNKNOWN	MARBLE																												10
CEX691		USGS		Geochemistry of rock samples from the National Geochemical Database: U.S. Geological Survey, Reston, VA.	U.S. Geological Survey	USGS		65.3389	-143.954	0.01				ES	METAMORPHIC	UNKNOWN	UNKNOWN	MARBLE																							20
CEX701		USGS		Geochemistry of rock samples from the National Geochemical Database: U.S. Geological Survey, Reston, VA.	U.S. Geological Survey	USGS		65.1539	-143.07	0.01				AAS	METAMORPHIC	UNKNOWN	UNKNOWN	MARBLE																												10
CEY032		USGS		Geochemistry of rock samples from the National Geochemical Database: U.S. Geological Survey, Reston, VA.	U.S. Geological Survey	USGS		65.1042	-144.614	0.01				AAS	METAMORPHIC	UNKNOWN	UNKNOWN	MARBLE																												25
CEY032		USGS		Geochemistry of rock samples from the National Geochemical Database: U.S. Geological Survey, Reston, VA.	U.S. Geological Survey	USGS		65.1042	-144.614	0.01				ES	METAMORPHIC	UNKNOWN	UNKNOWN	MARBLE																						0.2	500	5		5
CEY051		USGS		Geochemistry of rock samples from the National Geochemical Database: U.S. Geological Survey, Reston, VA.	U.S. Geological Survey	USGS		65.3217	-144.229	0.01				ES	METAMORPHIC	UNKNOWN	UNKNOWN	MARBLE																						1	1000	15	5	15
CEY052		USGS		Geochemistry of rock samples from the National Geochemical Database: U.S. Geological Survey, Reston, VA.	U.S. Geological Survey	USGS		65.3217	-144.229	0.01				ES	METAMORPHIC	UNKNOWN	UNKNOWN	MARBLE																						1	700	20	5	30
CEY068		USGS		Geochemistry of rock samples from the National Geochemical Database: U.S. Geological Survey, Reston, VA.	U.S. Geological Survey	USGS		65.6853	-145.888	0.01				ES	METAMORPHIC	UNKNOWN	UNKNOWN	MARBLE																						10		70	30	5
CEY080		USGS		Geochemistry of rock samples from the National Geochemical Database: U.S. Geological Survey, Reston, VA.	U.S. Geological Survey	USGS		65.7031	-146.73	0.01				ES	METAMORPHIC	UNKNOWN	UNKNOWN	MARBLE																						5	2000	30	30	10
CEY081		USGS		Geochemistry of rock samples from the National Geochemical Database: U.S. Geological Survey, Reston, VA.	U.S. Geological Survey	USGS		65.7031	-146.728	0.01				ES	METAMORPHIC	UNKNOWN	UNKNOWN	MARBLE																						5	1500	30	20	5
CEY144		USGS		Geochemistry of rock samples from the National Geochemical Database: U.S. Geological Survey, Reston, VA.	U.S. Geological Survey	USGS		65.2728	-144.502	0.01				ES	METAMORPHIC	UNKNOWN	UNKNOWN	MARBLE																						5	500	30	10	100
CEY155		USGS		Geochemistry of rock samples from the National Geochemical Database: U.S. Geological Survey, Reston, VA.	U.S. Geological Survey	USGS		65.2555	-144.499	0.01				ES	METAMORPHIC	UNKNOWN	UNKNOWN	MARBLE																						15	200	10	10	200		5000	10000	50
CEY887		USGS		Geochemistry of rock samples from the National Geochemical Database: U.S. Geological Survey, Reston, VA.	U.S. Geological Survey	USGS		65.193	-145.412	0.01				ES	METAMORPHIC	UNKNOWN	UNKNOWN	MARBLE																						2	500	30	20	10
CEY912		USGS		Geochemistry of rock samples from the National Geochemical Database: U.S. Geological Survey, Reston, VA.	U.S. Geological Survey	USGS		65.3306	-144.539	0.01				ES	METAMORPHIC	UNKNOWN	UNKNOWN	MARBLE																						1	500	10	5	15
CEY914		USGS		Geochemistry of rock samples from the National Geochemical Database: U.S. Geological Survey, Reston, VA.	U.S. Geological Survey	USGS		65.31	-144.478	0.01				ES	METAMORPHIC	UNKNOWN	UNKNOWN	MARBLE																						2	500	20	10
CEY916		USGS		Geochemistry of rock samples from the National Geochemical Database: U.S. Geological Survey, Reston, VA.	U.S. Geological Survey	USGS		65.3394	-144.592	0.01				ES	METAMORPHIC	UNKNOWN	UNKNOWN	MARBLE																						0.7	500	5
CEY925		USGS		Geochemistry of rock samples from the National Geochemical Database: U.S. Geological Survey, Reston, VA.	U.S. Geological Survey	USGS		65.1908	-144.337	0.01				ES	METAMORPHIC	UNKNOWN	UNKNOWN	MARBLE																						1	1000	15	7	10		300
CEY958		USGS		Geochemistry of rock samples from the National Geochemical Database: U.S. Geological Survey, Reston, VA.	U.S. Geological Survey	USGS		65.1194	-144.66	0.01				ES	METAMORPHIC	UNKNOWN	UNKNOWN	MARBLE																						2	700	20	15	10
CEY968		USGS		Geochemistry of rock samples from the National Geochemical Database: U.S. Geological Survey, Reston, VA.	U.S. Geological Survey	USGS		65.4922	-144.947	0.01				ES	METAMORPHIC	UNKNOWN	UNKNOWN	MARBLE																						5	1000	30	20	20
CEY969		USGS		Geochemistry of rock samples from the National Geochemical Database: U.S. Geological Survey, Reston, VA.	U.S. Geological Survey	USGS		65.4922	-144.947	0.01				ES	METAMORPHIC	UNKNOWN	UNKNOWN	MARBLE																						3	1500	30	15	20
CEY982		USGS		Geochemistry of rock samples from the National Geochemical Database: U.S. Geological Survey, Reston, VA.	U.S. Geological Survey	USGS		65.1155	-144.669	0.01				ES	METAMORPHIC	UNKNOWN	UNKNOWN	MARBLE																						2	1000	15	7
CEY983		USGS		Geochemistry of rock samples from the National Geochemical Database: U.S. Geological Survey, Reston, VA.	U.S. Geological Survey	USGS		65.1069	-144.68	0.01				ES	METAMORPHIC	UNKNOWN	UNKNOWN	MARBLE																						0.7	20
CFJ513		USGS		Geochemistry of rock samples from the National Geochemical Database: U.S. Geological Survey, Reston, VA.	U.S. Geological Survey	USGS		56.5253	-132.218	0.01				AAS	METAMORPHIC	UNKNOWN	UNKNOWN	MARBLE																										5		5
CFJ513		USGS		Geochemistry of rock samples from the National Geochemical Database: U.S. Geological Survey, Reston, VA.	U.S. Geological Survey	USGS		56.5253	-132.218	0.01				ES	METAMORPHIC	UNKNOWN	UNKNOWN	MARBLE																							1500			100
CFJ897		USGS		Geochemistry of rock samples from the National Geochemical Database: U.S. Geological Survey, Reston, VA.	U.S. Geological Survey	USGS		56.0547	-132.682	0.01				AAS	METAMORPHIC	UNKNOWN	UNKNOWN	MARBLE																										40		55
CFJ897		USGS		Geochemistry of rock samples from the National Geochemical Database: U.S. Geological Survey, Reston, VA.	U.S. Geological Survey	USGS		56.0547	-132.682	0.01				ES	METAMORPHIC	UNKNOWN	UNKNOWN	MARBLE																						3	1000	7	20	30
CFK789		USGS		Geochemistry of rock samples from the National Geochemical Database: U.S. Geological Survey, Reston, VA.	U.S. Geological Survey	USGS		58.0172	-135.88	0.01				AAS	METAMORPHIC	UNKNOWN	UNKNOWN	MARBLE																												5
CFK789		USGS		Geochemistry of rock samples from the National Geochemical Database: U.S. Geological Survey, Reston, VA.	U.S. Geological Survey	USGS		58.0172	-135.88	0.01				ES	METAMORPHIC	UNKNOWN	UNKNOWN	MARBLE																						1	200
CFK820		USGS		Geochemistry of rock samples from the National Geochemical Database: U.S. Geological Survey, Reston, VA.	U.S. Geological Survey	USGS		58.4055	-135.265	0.01				AAS	METAMORPHIC	UNKNOWN	UNKNOWN	MARBLE																												10
CFK820		USGS		Geochemistry of rock samples from the National Geochemical Database: U.S. Geological Survey, Reston, VA.	U.S. Geological Survey	USGS		58.4055	-135.265	0.01				ES	METAMORPHIC	UNKNOWN	UNKNOWN	MARBLE																						2	1000		10
CFK855		USGS		Geochemistry of rock samples from the National Geochemical Database: U.S. Geological Survey, Reston, VA.	U.S. Geological Survey	USGS		58.0361	-135.949	0.01				AAS	METAMORPHIC	UNKNOWN	UNKNOWN	MARBLE																												5
CFK855		USGS		Geochemistry of rock samples from the National Geochemical Database: U.S. Geological Survey, Reston, VA.	U.S. Geological Survey	USGS		58.0361	-135.949	0.01				ES	METAMORPHIC	UNKNOWN	UNKNOWN	MARBLE																							70
CFK898		USGS		Geochemistry of rock samples from the National Geochemical Database: U.S. Geological Survey, Reston, VA.	U.S. Geological Survey	USGS		58.9183	-134.615	0.01				AAS	METAMORPHIC	UNKNOWN	UNKNOWN	MARBLE																											0.1	15
CFK898		USGS		Geochemistry of rock samples from the National Geochemical Database: U.S. Geological Survey, Reston, VA.	U.S. Geological Survey	USGS		58.9183	-134.615	0.01				ES	METAMORPHIC	UNKNOWN	UNKNOWN	MARBLE																						0.1	20
CFK999		USGS		Geochemistry of rock samples from the National Geochemical Database: U.S. Geological Survey, Reston, VA.	U.S. Geological Survey	USGS		58.4828	-133.811	0.01				AAS	METAMORPHIC	UNKNOWN	UNKNOWN	MARBLE																											0.2	15
CFK999		USGS		Geochemistry of rock samples from the National Geochemical Database: U.S. Geological Survey, Reston, VA.	U.S. Geological Survey	USGS		58.4828	-133.811	0.01				ES	METAMORPHIC	UNKNOWN	UNKNOWN	MARBLE																						0.2	200	30						0.7
CFL802		USGS		Geochemistry of rock samples from the National Geochemical Database: U.S. Geological Survey, Reston, VA.	U.S. Geological Survey	USGS		59.163	-135.473	0.01				AAS	METAMORPHIC	UNKNOWN	UNKNOWN	MARBLE																											0.3	20
CFL802		USGS		Geochemistry of rock samples from the National Geochemical Database: U.S. Geological Survey, Reston, VA.	U.S. Geological Survey	USGS		59.163	-135.473	0.01				ES	METAMORPHIC	UNKNOWN	UNKNOWN	MARBLE																						1	1000	20	5
CFL803		USGS		Geochemistry of rock samples from the National Geochemical Database: U.S. Geological Survey, Reston, VA.	U.S. Geological Survey	USGS		59.163	-135.473	0.01				AAS	METAMORPHIC	UNKNOWN	UNKNOWN	MARBLE																												60
CFL803		USGS		Geochemistry of rock samples from the National Geochemical Database: U.S. Geological Survey, Reston, VA.	U.S. Geological Survey	USGS		59.163	-135.473	0.01				ES	METAMORPHIC	UNKNOWN	UNKNOWN	MARBLE																						5	200	70	50	50
CFN346		USGS		Geochemistry of rock samples from the National Geochemical Database: U.S. Geological Survey, Reston, VA.	U.S. Geological Survey	USGS		67.6519	-161.406	0.01				AAS	METAMORPHIC	UNKNOWN	UNKNOWN	MARBLE																											1.2	65
CFN346		USGS		Geochemistry of rock samples from the National Geochemical Database: U.S. Geological Survey, Reston, VA.	U.S. Geological Survey	USGS		67.6519	-161.406	0.01				ES	METAMORPHIC	UNKNOWN	UNKNOWN	MARBLE																						5	2000	30		7
CFN349		USGS		Geochemistry of rock samples from the National Geochemical Database: U.S. Geological Survey, Reston, VA.	U.S. Geological Survey	USGS		67.65	-161.386	0.01				AAS	METAMORPHIC	UNKNOWN	UNKNOWN	MARBLE																												5
CFN349		USGS		Geochemistry of rock samples from the National Geochemical Database: U.S. Geological Survey, Reston, VA.	U.S. Geological Survey	USGS		67.65	-161.386	0.01				ES	METAMORPHIC	UNKNOWN	UNKNOWN	MARBLE																						3	1000
CFP641		USGS		Geochemistry of rock samples from the National Geochemical Database: U.S. Geological Survey, Reston, VA.	U.S. Geological Survey	USGS		62.4505	-157.922	0.01				AAS	METAMORPHIC	UNKNOWN	UNKNOWN	MARBLE																											0.7	25	20000
CFP641		USGS		Geochemistry of rock samples from the National Geochemical Database: U.S. Geological Survey, Reston, VA.	U.S. Geological Survey	USGS		62.4505	-157.922	0.01				ES	METAMORPHIC	UNKNOWN	UNKNOWN	MARBLE																						1	300	20		50				50
CFV333		USGS		Geochemistry of rock samples from the National Geochemical Database: U.S. Geological Survey, Reston, VA.	U.S. Geological Survey	USGS		58.0667	-134.118	0.01				AAS	METAMORPHIC	UNKNOWN	UNKNOWN	MARBLE																											0.2
CFV333		USGS		Geochemistry of rock samples from the National Geochemical Database: U.S. Geological Survey, Reston, VA.	U.S. Geological Survey	USGS		58.0667	-134.118	0.01				ES	METAMORPHIC	UNKNOWN	UNKNOWN	MARBLE																						2	700	20	5	10
CFV423		USGS		Geochemistry of rock samples from the National Geochemical Database: U.S. Geological Survey, Reston, VA.	U.S. Geological Survey	USGS		58.9572	-134.644	0.01				AAS	METAMORPHIC	UNKNOWN	UNKNOWN	MARBLE																											1	10
CFV423		USGS		Geochemistry of rock samples from the National Geochemical Database: U.S. Geological Survey, Reston, VA.	U.S. Geological Survey	USGS		58.9572	-134.644	0.01				ES	METAMORPHIC	UNKNOWN	UNKNOWN	MARBLE																						0.7	300	100
CFV481		USGS		Geochemistry of rock samples from the National Geochemical Database: U.S. Geological Survey, Reston, VA.	U.S. Geological Survey	USGS		58.2739	-134.941	0.01				AAS	METAMORPHIC	UNKNOWN	UNKNOWN	MARBLE																											0.1	10
CFV481		USGS		Geochemistry of rock samples from the National Geochemical Database: U.S. Geological Survey, Reston, VA.	U.S. Geological Survey	USGS		58.2739	-134.941	0.01				ES	METAMORPHIC	UNKNOWN	UNKNOWN	MARBLE																						0.5	700			5
CFV649		USGS		Geochemistry of rock samples from the National Geochemical Database: U.S. Geological Survey, Reston, VA.	U.S. Geological Survey	USGS		58.1272	-134.961	0.01				AAS	METAMORPHIC	UNKNOWN	UNKNOWN	MARBLE																												5
CFV649		USGS		Geochemistry of rock samples from the National Geochemical Database: U.S. Geological Survey, Reston, VA.	U.S. Geological Survey	USGS		58.1272	-134.961	0.01				ES	METAMORPHIC	UNKNOWN	UNKNOWN	MARBLE																						0.7	200
CFV889		USGS		Geochemistry of rock samples from the National Geochemical Database: U.S. Geological Survey, Reston, VA.	U.S. Geological Survey	USGS		58.4578	-134.978	0.01				AAS	METAMORPHIC	UNKNOWN	UNKNOWN	MARBLE																												5
CFV889		USGS		Geochemistry of rock samples from the National Geochemical Database: U.S. Geological Survey, Reston, VA.	U.S. Geological Survey	USGS		58.4578	-134.978	0.01				ES	METAMORPHIC	UNKNOWN	UNKNOWN	MARBLE																						1	5000	10	20	5
CFY854		USGS		Geochemistry of rock samples from the National Geochemical Database: U.S. Geological Survey, Reston, VA.	U.S. Geological Survey	USGS		65.5239	-145.417	0.01				AAS	METAMORPHIC	UNKNOWN	UNKNOWN	MARBLE																												30
CFY854		USGS		Geochemistry of rock samples from the National Geochemical Database: U.S. Geological Survey, Reston, VA.	U.S. Geological Survey	USGS		65.5239	-145.417	0.01				ES	METAMORPHIC	UNKNOWN	UNKNOWN	MARBLE																						1	3000	5		5
CFY864		USGS		Geochemistry of rock samples from the National Geochemical Database: U.S. Geological Survey, Reston, VA.	U.S. Geological Survey	USGS		65.5261	-145.311	0.01				AAS	METAMORPHIC	UNKNOWN	UNKNOWN	MARBLE																												310
CFY864		USGS		Geochemistry of rock samples from the National Geochemical Database: U.S. Geological Survey, Reston, VA.	U.S. Geological Survey	USGS		65.5261	-145.311	0.01				ES	METAMORPHIC	UNKNOWN	UNKNOWN	MARBLE																						1	300	7		5
CGA703		USGS		Geochemistry of rock samples from the National Geochemical Database: U.S. Geological Survey, Reston, VA.	U.S. Geological Survey	USGS		65.3172	-163.532	0.01				AAS	METAMORPHIC	UNKNOWN	UNKNOWN	MARBLE																												5	100
CGA703		USGS		Geochemistry of rock samples from the National Geochemical Database: U.S. Geological Survey, Reston, VA.	U.S. Geological Survey	USGS		65.3172	-163.532	0.01				COL	METAMORPHIC	UNKNOWN	UNKNOWN	MARBLE
CGA703		USGS		Geochemistry of rock samples from the National Geochemical Database: U.S. Geological Survey, Reston, VA.	U.S. Geological Survey	USGS		65.3172	-163.532	0.01				ES	METAMORPHIC	UNKNOWN	UNKNOWN	MARBLE																						0.2	100						200
CGA716		USGS		Geochemistry of rock samples from the National Geochemical Database: U.S. Geological Survey, Reston, VA.	U.S. Geological Survey	USGS		65.7558	-162.381	0.01				AAS	METAMORPHIC	UNKNOWN	UNKNOWN	MARBLE																											3.3	700	470
CGA716		USGS		Geochemistry of rock samples from the National Geochemical Database: U.S. Geological Survey, Reston, VA.	U.S. Geological Survey	USGS		65.7558	-162.381	0.01				COL	METAMORPHIC	UNKNOWN	UNKNOWN	MARBLE
CGA712		USGS		Geochemistry of rock samples from the National Geochemical Database: U.S. Geological Survey, Reston, VA.	U.S. Geological Survey	USGS		65.7558	-162.381	0.01				AAS	METAMORPHIC	UNKNOWN	UNKNOWN	MARBLE																											2.3	550	20
CGA712		USGS		Geochemistry of rock samples from the National Geochemical Database: U.S. Geological Survey, Reston, VA.	U.S. Geological Survey	USGS		65.7558	-162.381	0.01				COL	METAMORPHIC	UNKNOWN	UNKNOWN	MARBLE
CGA712		USGS		Geochemistry of rock samples from the National Geochemical Database: U.S. Geological Survey, Reston, VA.	U.S. Geological Survey	USGS		65.7558	-162.381	0.01				ES	METAMORPHIC	UNKNOWN	UNKNOWN	MARBLE																						2	1500			20		300
CGA716		USGS		Geochemistry of rock samples from the National Geochemical Database: U.S. Geological Survey, Reston, VA.	U.S. Geological Survey	USGS		65.7558	-162.381	0.01				ES	METAMORPHIC	UNKNOWN	UNKNOWN	MARBLE																						10	200	30		1000		700	500	15
CGA719		USGS		Geochemistry of rock samples from the National Geochemical Database: U.S. Geological Survey, Reston, VA.	U.S. Geological Survey	USGS		65.7558	-162.381	0.01				AAS	METAMORPHIC	UNKNOWN	UNKNOWN	MARBLE																											1.6	120	30
CGA719		USGS		Geochemistry of rock samples from the National Geochemical Database: U.S. Geological Survey, Reston, VA.	U.S. Geological Survey	USGS		65.7558	-162.381	0.01				COL	METAMORPHIC	UNKNOWN	UNKNOWN	MARBLE
CGA719		USGS		Geochemistry of rock samples from the National Geochemical Database: U.S. Geological Survey, Reston, VA.	U.S. Geological Survey	USGS		65.7558	-162.381	0.01				ES	METAMORPHIC	UNKNOWN	UNKNOWN	MARBLE																						1	1000	10		15				1.5
CGB280		USGS		Geochemistry of rock samples from the National Geochemical Database: U.S. Geological Survey, Reston, VA.	U.S. Geological Survey	USGS		67.1542	-160.496	0.01				AAS	METAMORPHIC	UNKNOWN	UNKNOWN	MARBLE																												20
CGB280		USGS		Geochemistry of rock samples from the National Geochemical Database: U.S. Geological Survey, Reston, VA.	U.S. Geological Survey	USGS		67.1542	-160.496	0.01				ES	METAMORPHIC	UNKNOWN	UNKNOWN	MARBLE																						1	300	5
CGC401		USGS		Geochemistry of rock samples from the National Geochemical Database: U.S. Geological Survey, Reston, VA.	U.S. Geological Survey	USGS		58.1028	-134.661	0.01				AAS	METAMORPHIC	UNKNOWN	UNKNOWN	MARBLE																												50	10
CGC401		USGS		Geochemistry of rock samples from the National Geochemical Database: U.S. Geological Survey, Reston, VA.	U.S. Geological Survey	USGS		58.1028	-134.661	0.01				ES	METAMORPHIC	UNKNOWN	UNKNOWN	MARBLE																						3	300	1500	70	10
CGD425		USGS		Geochemistry of rock samples from the National Geochemical Database: U.S. Geological Survey, Reston, VA.	U.S. Geological Survey	USGS		67.7083	-159.426	0.01				AAS	METAMORPHIC	UNKNOWN	UNKNOWN	MARBLE																												5
CGD425		USGS		Geochemistry of rock samples from the National Geochemical Database: U.S. Geological Survey, Reston, VA.	U.S. Geological Survey	USGS		67.7083	-159.426	0.01				ES	METAMORPHIC	UNKNOWN	UNKNOWN	MARBLE																						7	3000	30	50
CGD670		USGS		Geochemistry of rock samples from the National Geochemical Database: U.S. Geological Survey, Reston, VA.	U.S. Geological Survey	USGS		67.6764	-160.719	0.01				AAS	METAMORPHIC	UNKNOWN	UNKNOWN	MARBLE																												5
CGD670		USGS		Geochemistry of rock samples from the National Geochemical Database: U.S. Geological Survey, Reston, VA.	U.S. Geological Survey	USGS		67.6764	-160.719	0.01				ES	METAMORPHIC	UNKNOWN	UNKNOWN	MARBLE																						0.05	150
CGD722		USGS		Geochemistry of rock samples from the National Geochemical Database: U.S. Geological Survey, Reston, VA.	U.S. Geological Survey	USGS		67.3417	-160.242	0.01				AAS	METAMORPHIC	UNKNOWN	UNKNOWN	MARBLE																												5
CGD722		USGS		Geochemistry of rock samples from the National Geochemical Database: U.S. Geological Survey, Reston, VA.	U.S. Geological Survey	USGS		67.3417	-160.242	0.01				ES	METAMORPHIC	UNKNOWN	UNKNOWN	MARBLE																						2	1000
CGF646		USGS		Geochemistry of rock samples from the National Geochemical Database: U.S. Geological Survey, Reston, VA.	U.S. Geological Survey	USGS		65.6242	-147.246	0.01				AAS	METAMORPHIC	UNKNOWN	UNKNOWN	MARBLE																											0.2	35
CGF646		USGS		Geochemistry of rock samples from the National Geochemical Database: U.S. Geological Survey, Reston, VA.	U.S. Geological Survey	USGS		65.6242	-147.246	0.01				ES	METAMORPHIC	UNKNOWN	UNKNOWN	MARBLE																						0.07	200
CGH541		USGS		Geochemistry of rock samples from the National Geochemical Database: U.S. Geological Survey, Reston, VA.	U.S. Geological Survey	USGS		55.6264	-132.555	0.01				AAS	METAMORPHIC	UNKNOWN	UNKNOWN	MARBLE
CGH541		USGS		Geochemistry of rock samples from the National Geochemical Database: U.S. Geological Survey, Reston, VA.	U.S. Geological Survey	USGS		55.6264	-132.555	0.01				ES	METAMORPHIC	UNKNOWN	UNKNOWN	MARBLE																						3	2000	20	100	2000				1.5
CGH545		USGS		Geochemistry of rock samples from the National Geochemical Database: U.S. Geological Survey, Reston, VA.	U.S. Geological Survey	USGS		55.6264	-132.555	0.01				ES	METAMORPHIC	UNKNOWN	UNKNOWN	MARBLE																						20	700	50	200	15000		300		7
CGI111		USGS		Geochemistry of rock samples from the National Geochemical Database: U.S. Geological Survey, Reston, VA.	U.S. Geological Survey	USGS		58.4375	-135.144	0.01				AAS	METAMORPHIC	UNKNOWN	UNKNOWN	MARBLE																											0.2	5
CGI111		USGS		Geochemistry of rock samples from the National Geochemical Database: U.S. Geological Survey, Reston, VA.	U.S. Geological Survey	USGS		58.4375	-135.144	0.01				ES	METAMORPHIC	UNKNOWN	UNKNOWN	MARBLE																						0.2	150			5
CGI286		USGS		Geochemistry of rock samples from the National Geochemical Database: U.S. Geological Survey, Reston, VA.	U.S. Geological Survey	USGS		55.5667	-132.467	0.01				AAS	METAMORPHIC	UNKNOWN	UNKNOWN	MARBLE
CGI286		USGS		Geochemistry of rock samples from the National Geochemical Database: U.S. Geological Survey, Reston, VA.	U.S. Geological Survey	USGS		55.5667	-132.467	0.01				ES	METAMORPHIC	UNKNOWN	UNKNOWN	MARBLE																						10	700	50	150			200		100
CGI287		USGS		Geochemistry of rock samples from the National Geochemical Database: U.S. Geological Survey, Reston, VA.	U.S. Geological Survey	USGS		55.5833	-132.467	0.01				AAS	METAMORPHIC	UNKNOWN	UNKNOWN	MARBLE
CGI287		USGS		Geochemistry of rock samples from the National Geochemical Database: U.S. Geological Survey, Reston, VA.	U.S. Geological Survey	USGS		55.5833	-132.467	0.01				ES	METAMORPHIC	UNKNOWN	UNKNOWN	MARBLE																						10	700	20	150			500		100
CGL880		USGS		Geochemistry of rock samples from the National Geochemical Database: U.S. Geological Survey, Reston, VA.	U.S. Geological Survey	USGS		67.6189	-161.224	0.01				AAS	METAMORPHIC	UNKNOWN	UNKNOWN	MARBLE																												10
CGL880		USGS		Geochemistry of rock samples from the National Geochemical Database: U.S. Geological Survey, Reston, VA.	U.S. Geological Survey	USGS		67.6189	-161.224	0.01				ES	METAMORPHIC	UNKNOWN	UNKNOWN	MARBLE																						0.7	70	10		7
CGR895		USGS		Geochemistry of rock samples from the National Geochemical Database: U.S. Geological Survey, Reston, VA.	U.S. Geological Survey	USGS		59.1167	-134.633	0.01				AAS	METAMORPHIC	UNKNOWN	UNKNOWN	MARBLE																											1	20
CGR895		USGS		Geochemistry of rock samples from the National Geochemical Database: U.S. Geological Survey, Reston, VA.	U.S. Geological Survey	USGS		59.1167	-134.633	0.01				ES	METAMORPHIC	UNKNOWN	UNKNOWN	MARBLE																						0.15	200
CGR898		USGS		Geochemistry of rock samples from the National Geochemical Database: U.S. Geological Survey, Reston, VA.	U.S. Geological Survey	USGS		59.1167	-134.633	0.01				AAS	METAMORPHIC	UNKNOWN	UNKNOWN	MARBLE																											3.8	120	35
CGR898		USGS		Geochemistry of rock samples from the National Geochemical Database: U.S. Geological Survey, Reston, VA.	U.S. Geological Survey	USGS		59.1167	-134.633	0.01				ES	METAMORPHIC	UNKNOWN	UNKNOWN	MARBLE																						2	700	30		15
CGR902		USGS		Geochemistry of rock samples from the National Geochemical Database: U.S. Geological Survey, Reston, VA.	U.S. Geological Survey	USGS		59.1261	-134.525	0.01				AAS	METAMORPHIC	UNKNOWN	UNKNOWN	MARBLE																											1.1	65
CGR902		USGS		Geochemistry of rock samples from the National Geochemical Database: U.S. Geological Survey, Reston, VA.	U.S. Geological Survey	USGS		59.1261	-134.525	0.01				ES	METAMORPHIC	UNKNOWN	UNKNOWN	MARBLE																						3	700	30	10
CGR938		USGS		Geochemistry of rock samples from the National Geochemical Database: U.S. Geological Survey, Reston, VA.	U.S. Geological Survey	USGS		59.1972	-135.222	0.01				AAS	METAMORPHIC	UNKNOWN	UNKNOWN	MARBLE																												5
CGR938		USGS		Geochemistry of rock samples from the National Geochemical Database: U.S. Geological Survey, Reston, VA.	U.S. Geological Survey	USGS		59.1972	-135.222	0.01				ES	METAMORPHIC	UNKNOWN	UNKNOWN	MARBLE																						3	1500	20	7
CGR986		USGS		Geochemistry of rock samples from the National Geochemical Database: U.S. Geological Survey, Reston, VA.	U.S. Geological Survey	USGS		59.005	-134.853	0.01				AAS	METAMORPHIC	UNKNOWN	UNKNOWN	MARBLE																											4.1	35
CGR986		USGS		Geochemistry of rock samples from the National Geochemical Database: U.S. Geological Survey, Reston, VA.	U.S. Geological Survey	USGS		59.005	-134.853	0.01				ES	METAMORPHIC	UNKNOWN	UNKNOWN	MARBLE																						0.15	150	15		7
CGR993		USGS		Geochemistry of rock samples from the National Geochemical Database: U.S. Geological Survey, Reston, VA.	U.S. Geological Survey	USGS		59.0986	-135.001	0.01				AAS	METAMORPHIC	UNKNOWN	UNKNOWN	MARBLE																											0.2	15
CGR993		USGS		Geochemistry of rock samples from the National Geochemical Database: U.S. Geological Survey, Reston, VA.	U.S. Geological Survey	USGS		59.0986	-135.001	0.01				ES	METAMORPHIC	UNKNOWN	UNKNOWN	MARBLE																						3	700	20	7
CGR995		USGS		Geochemistry of rock samples from the National Geochemical Database: U.S. Geological Survey, Reston, VA.	U.S. Geological Survey	USGS		59.0597	-135.023	0.01				AAS	METAMORPHIC	UNKNOWN	UNKNOWN	MARBLE																												20
CGR995		USGS		Geochemistry of rock samples from the National Geochemical Database: U.S. Geological Survey, Reston, VA.	U.S. Geological Survey	USGS		59.0597	-135.023	0.01				ES	METAMORPHIC	UNKNOWN	UNKNOWN	MARBLE																						5	700	50	15
CGS010		USGS		Geochemistry of rock samples from the National Geochemical Database: U.S. Geological Survey, Reston, VA.	U.S. Geological Survey	USGS		59.2472	-135.043	0.01				AAS	METAMORPHIC	UNKNOWN	UNKNOWN	MARBLE																											0.2
CGS010		USGS		Geochemistry of rock samples from the National Geochemical Database: U.S. Geological Survey, Reston, VA.	U.S. Geological Survey	USGS		59.2472	-135.043	0.01				ES	METAMORPHIC	UNKNOWN	UNKNOWN	MARBLE																							30
CGY868		USGS		Geochemistry of rock samples from the National Geochemical Database: U.S. Geological Survey, Reston, VA.	U.S. Geological Survey	USGS		58.97	-134.776	0.01				AAS	METAMORPHIC	UNKNOWN	UNKNOWN	MARBLE																											0.1	5
CGY868		USGS		Geochemistry of rock samples from the National Geochemical Database: U.S. Geological Survey, Reston, VA.	U.S. Geological Survey	USGS		58.97	-134.776	0.01				ES	METAMORPHIC	UNKNOWN	UNKNOWN	MARBLE																							70
CGY951		USGS		Geochemistry of rock samples from the National Geochemical Database: U.S. Geological Survey, Reston, VA.	U.S. Geological Survey	USGS		58.9605	-134.647	0.01				ES	METAMORPHIC	UNKNOWN	UNKNOWN	MARBLE																						0.15	200	20
CGY957		USGS		Geochemistry of rock samples from the National Geochemical Database: U.S. Geological Survey, Reston, VA.	U.S. Geological Survey	USGS		58.8481	-135.306	0.01				AAS	METAMORPHIC	UNKNOWN	UNKNOWN	MARBLE																											0.1	5
CGY957		USGS		Geochemistry of rock samples from the National Geochemical Database: U.S. Geological Survey, Reston, VA.	U.S. Geological Survey	USGS		58.8481	-135.306	0.01				ES	METAMORPHIC	UNKNOWN	UNKNOWN	MARBLE																						0.1	150
CGY962		USGS		Geochemistry of rock samples from the National Geochemical Database: U.S. Geological Survey, Reston, VA.	U.S. Geological Survey	USGS		58.7153	-135.293	0.01				ES	METAMORPHIC	UNKNOWN	UNKNOWN	MARBLE																						0.5	1000
CGZ085		USGS		Geochemistry of rock samples from the National Geochemical Database: U.S. Geological Survey, Reston, VA.	U.S. Geological Survey	USGS		58.8311	-135.289	0.01				ES	METAMORPHIC	UNKNOWN	UNKNOWN	MARBLE																						0.15	100
CGZ087		USGS		Geochemistry of rock samples from the National Geochemical Database: U.S. Geological Survey, Reston, VA.	U.S. Geological Survey	USGS		58.7972	-135.256	0.01				ES	METAMORPHIC	UNKNOWN	UNKNOWN	MARBLE																						0.3	1000			7
CGZ088		USGS		Geochemistry of rock samples from the National Geochemical Database: U.S. Geological Survey, Reston, VA.	U.S. Geological Survey	USGS		58.7661	-135.238	0.01				ES	METAMORPHIC	UNKNOWN	UNKNOWN	MARBLE																							200
CGZ948		USGS		Geochemistry of rock samples from the National Geochemical Database: U.S. Geological Survey, Reston, VA.	U.S. Geological Survey	USGS		55.1461	-132.078	0.01				AAS	METAMORPHIC	UNKNOWN	UNKNOWN	MARBLE
CGZ948		USGS		Geochemistry of rock samples from the National Geochemical Database: U.S. Geological Survey, Reston, VA.	U.S. Geological Survey	USGS		55.1461	-132.078	0.01				ES	METAMORPHIC	UNKNOWN	UNKNOWN	MARBLE																						0.7	500			70		1000		0.5
CGZ949		USGS		Geochemistry of rock samples from the National Geochemical Database: U.S. Geological Survey, Reston, VA.	U.S. Geological Survey	USGS		55.1461	-132.078	0.01				AAS	METAMORPHIC	UNKNOWN	UNKNOWN	MARBLE
CGZ949		USGS		Geochemistry of rock samples from the National Geochemical Database: U.S. Geological Survey, Reston, VA.	U.S. Geological Survey	USGS		55.1461	-132.078	0.01				ES	METAMORPHIC	UNKNOWN	UNKNOWN	MARBLE																						0.5	150	10		30				0.7
CGZ950		USGS		Geochemistry of rock samples from the National Geochemical Database: U.S. Geological Survey, Reston, VA.	U.S. Geological Survey	USGS		55.1461	-132.078	0.01				AAS	METAMORPHIC	UNKNOWN	UNKNOWN	MARBLE
CGZ950		USGS		Geochemistry of rock samples from the National Geochemical Database: U.S. Geological Survey, Reston, VA.	U.S. Geological Survey	USGS		55.1461	-132.078	0.01				ES	METAMORPHIC	UNKNOWN	UNKNOWN	MARBLE																						0.3	150	10		30				0.7
CGZ951		USGS		Geochemistry of rock samples from the National Geochemical Database: U.S. Geological Survey, Reston, VA.	U.S. Geological Survey	USGS		55.1333	-132.197	0.01				AAS	METAMORPHIC	UNKNOWN	UNKNOWN	MARBLE
CGZ951		USGS		Geochemistry of rock samples from the National Geochemical Database: U.S. Geological Survey, Reston, VA.	U.S. Geological Survey	USGS		55.1333	-132.197	0.01				ES	METAMORPHIC	UNKNOWN	UNKNOWN	MARBLE																						15	200	100	100					150
CGZ952		USGS		Geochemistry of rock samples from the National Geochemical Database: U.S. Geological Survey, Reston, VA.	U.S. Geological Survey	USGS		55.1333	-132.197	0.01				ES	METAMORPHIC	UNKNOWN	UNKNOWN	MARBLE																						10	200	30	70					150
CHA037		USGS		Geochemistry of rock samples from the National Geochemical Database: U.S. Geological Survey, Reston, VA.	U.S. Geological Survey	USGS		55.4903	-132.523	0.01				ES	METAMORPHIC	UNKNOWN	UNKNOWN	MARBLE																						5	1500		20	150
CHT376		USGS		Geochemistry of rock samples from the National Geochemical Database: U.S. Geological Survey, Reston, VA.	U.S. Geological Survey	USGS		59.0636	-135.537	0.01				AAS	METAMORPHIC	UNKNOWN	UNKNOWN	MARBLE																											0.1	20
CHT376		USGS		Geochemistry of rock samples from the National Geochemical Database: U.S. Geological Survey, Reston, VA.	U.S. Geological Survey	USGS		59.0636	-135.537	0.01				ES	METAMORPHIC	UNKNOWN	UNKNOWN	MARBLE																						0.2	70
CHT449		USGS		Geochemistry of rock samples from the National Geochemical Database: U.S. Geological Survey, Reston, VA.	U.S. Geological Survey	USGS		59.2269	-135.636	0.01				ES	METAMORPHIC	UNKNOWN	UNKNOWN	MARBLE																						5	300					200
CHT471		USGS		Geochemistry of rock samples from the National Geochemical Database: U.S. Geological Survey, Reston, VA.	U.S. Geological Survey	USGS		59.1011	-135.66	0.01				ES	METAMORPHIC	UNKNOWN	UNKNOWN	MARBLE																						0.5	700	5	10	5
CHT501		USGS		Geochemistry of rock samples from the National Geochemical Database: U.S. Geological Survey, Reston, VA.	U.S. Geological Survey	USGS		59.0933	-135.493	0.01				ES	METAMORPHIC	UNKNOWN	UNKNOWN	MARBLE																						0.1	100
CHT553		USGS		Geochemistry of rock samples from the National Geochemical Database: U.S. Geological Survey, Reston, VA.	U.S. Geological Survey	USGS		59.0864	-135.501	0.01				AAS	METAMORPHIC	UNKNOWN	UNKNOWN	MARBLE																											0.1	140
CHT553		USGS		Geochemistry of rock samples from the National Geochemical Database: U.S. Geological Survey, Reston, VA.	U.S. Geological Survey	USGS		59.0864	-135.501	0.01				ES	METAMORPHIC	UNKNOWN	UNKNOWN	MARBLE																						15	1000	100	70	150		200
CHT561		USGS		Geochemistry of rock samples from the National Geochemical Database: U.S. Geological Survey, Reston, VA.	U.S. Geological Survey	USGS		59.09	-135.592	0.01				AAS	METAMORPHIC	UNKNOWN	UNKNOWN	MARBLE																											0.4	190	50
CHT561		USGS		Geochemistry of rock samples from the National Geochemical Database: U.S. Geological Survey, Reston, VA.	U.S. Geological Survey	USGS		59.09	-135.592	0.01				ES	METAMORPHIC	UNKNOWN	UNKNOWN	MARBLE																						5	300	50	15	50		200
CHT564		USGS		Geochemistry of rock samples from the National Geochemical Database: U.S. Geological Survey, Reston, VA.	U.S. Geological Survey	USGS		59.0747	-135.611	0.01				AAS	METAMORPHIC	UNKNOWN	UNKNOWN	MARBLE																												5
CHT564		USGS		Geochemistry of rock samples from the National Geochemical Database: U.S. Geological Survey, Reston, VA.	U.S. Geological Survey	USGS		59.0747	-135.611	0.01				ES	METAMORPHIC	UNKNOWN	UNKNOWN	MARBLE																						1	3000		5
CHT717		USGS		Geochemistry of rock samples from the National Geochemical Database: U.S. Geological Survey, Reston, VA.	U.S. Geological Survey	USGS		59.1214	-135.521	0.01				ES	METAMORPHIC	UNKNOWN	UNKNOWN	MARBLE																						5	1000	100	20	20
CHT744		USGS		Geochemistry of rock samples from the National Geochemical Database: U.S. Geological Survey, Reston, VA.	U.S. Geological Survey	USGS		59.0936	-135.475	0.01				AAS	METAMORPHIC	UNKNOWN	UNKNOWN	MARBLE																											0.2	25
CHT744		USGS		Geochemistry of rock samples from the National Geochemical Database: U.S. Geological Survey, Reston, VA.	U.S. Geological Survey	USGS		59.0936	-135.475	0.01				ES	METAMORPHIC	UNKNOWN	UNKNOWN	MARBLE																						1	150	5		10
CHV216		USGS		Geochemistry of rock samples from the National Geochemical Database: U.S. Geological Survey, Reston, VA.	U.S. Geological Survey	USGS		58.9147	-135.44	0.01				ES	METAMORPHIC	UNKNOWN	UNKNOWN	MARBLE																						0.1	70
CHV224		USGS		Geochemistry of rock samples from the National Geochemical Database: U.S. Geological Survey, Reston, VA.	U.S. Geological Survey	USGS		58.9078	-135.571	0.01				AAS	METAMORPHIC	UNKNOWN	UNKNOWN	MARBLE																											1.3	160
CHV224		USGS		Geochemistry of rock samples from the National Geochemical Database: U.S. Geological Survey, Reston, VA.	U.S. Geological Survey	USGS		58.9078	-135.571	0.01				ES	METAMORPHIC	UNKNOWN	UNKNOWN	MARBLE																						5	200	30	15	30
CHV425		USGS		Geochemistry of rock samples from the National Geochemical Database: U.S. Geological Survey, Reston, VA.	U.S. Geological Survey	USGS		59.2139	-135.53	0.01				AAS	METAMORPHIC	UNKNOWN	UNKNOWN	MARBLE																												30
CHV425		USGS		Geochemistry of rock samples from the National Geochemical Database: U.S. Geological Survey, Reston, VA.	U.S. Geological Survey	USGS		59.2139	-135.53	0.01				ES	METAMORPHIC	UNKNOWN	UNKNOWN	MARBLE																						2	700	30	5	5
CHV583		USGS		Geochemistry of rock samples from the National Geochemical Database: U.S. Geological Survey, Reston, VA.	U.S. Geological Survey	USGS		59.0181	-135.453	0.01				ES	METAMORPHIC	UNKNOWN	UNKNOWN	MARBLE																							30
CHY145		USGS		Geochemistry of rock samples from the National Geochemical Database: U.S. Geological Survey, Reston, VA.	U.S. Geological Survey	USGS		58.1264	-134.061	0.01				AAS	METAMORPHIC	UNKNOWN	UNKNOWN	MARBLE																											0.4	20
CHY145		USGS		Geochemistry of rock samples from the National Geochemical Database: U.S. Geological Survey, Reston, VA.	U.S. Geological Survey	USGS		58.1264	-134.061	0.01				ES	METAMORPHIC	UNKNOWN	UNKNOWN	MARBLE																						1	500			5
CHY675		USGS		Geochemistry of rock samples from the National Geochemical Database: U.S. Geological Survey, Reston, VA.	U.S. Geological Survey	USGS		65.8933	-147.259	0.01				AAS	METAMORPHIC	UNKNOWN	UNKNOWN	MARBLE																												10
CHY675		USGS		Geochemistry of rock samples from the National Geochemical Database: U.S. Geological Survey, Reston, VA.	U.S. Geological Survey	USGS		65.8933	-147.259	0.01				ES	METAMORPHIC	UNKNOWN	UNKNOWN	MARBLE																						0.1	2000
CHY676		USGS		Geochemistry of rock samples from the National Geochemical Database: U.S. Geological Survey, Reston, VA.	U.S. Geological Survey	USGS		65.8933	-147.259	0.01				AAS	METAMORPHIC	UNKNOWN	UNKNOWN	MARBLE																											0.4	65
CHY676		USGS		Geochemistry of rock samples from the National Geochemical Database: U.S. Geological Survey, Reston, VA.	U.S. Geological Survey	USGS		65.8933	-147.259	0.01				ES	METAMORPHIC	UNKNOWN	UNKNOWN	MARBLE																							70
CHY689		USGS		Geochemistry of rock samples from the National Geochemical Database: U.S. Geological Survey, Reston, VA.	U.S. Geological Survey	USGS		65.8597	-147.536	0.01				AAS	METAMORPHIC	UNKNOWN	UNKNOWN	MARBLE																												25
CHY689		USGS		Geochemistry of rock samples from the National Geochemical Database: U.S. Geological Survey, Reston, VA.	U.S. Geological Survey	USGS		65.8597	-147.536	0.01				ES	METAMORPHIC	UNKNOWN	UNKNOWN	MARBLE																						0.5	70
CHZ121		USGS		Geochemistry of rock samples from the National Geochemical Database: U.S. Geological Survey, Reston, VA.	U.S. Geological Survey	USGS		65.8942	-147.443	0.01				AAS	METAMORPHIC	UNKNOWN	UNKNOWN	MARBLE																											0.3	30
CHZ121		USGS		Geochemistry of rock samples from the National Geochemical Database: U.S. Geological Survey, Reston, VA.	U.S. Geological Survey	USGS		65.8942	-147.443	0.01				ES	METAMORPHIC	UNKNOWN	UNKNOWN	MARBLE																							50
CHZ122		USGS		Geochemistry of rock samples from the National Geochemical Database: U.S. Geological Survey, Reston, VA.	U.S. Geological Survey	USGS		65.8994	-147.423	0.01				AAS	METAMORPHIC	UNKNOWN	UNKNOWN	MARBLE																											1.1	40
CHZ122		USGS		Geochemistry of rock samples from the National Geochemical Database: U.S. Geological Survey, Reston, VA.	U.S. Geological Survey	USGS		65.8994	-147.423	0.01				ES	METAMORPHIC	UNKNOWN	UNKNOWN	MARBLE																							50
CHZ124		USGS		Geochemistry of rock samples from the National Geochemical Database: U.S. Geological Survey, Reston, VA.	U.S. Geological Survey	USGS		65.9	-147.368	0.01				AAS	METAMORPHIC	UNKNOWN	UNKNOWN	MARBLE
CHZ124		USGS		Geochemistry of rock samples from the National Geochemical Database: U.S. Geological Survey, Reston, VA.	U.S. Geological Survey	USGS		65.9	-147.368	0.01				ES	METAMORPHIC	UNKNOWN	UNKNOWN	MARBLE																						1	1500	7			200
CHZ125		USGS		Geochemistry of rock samples from the National Geochemical Database: U.S. Geological Survey, Reston, VA.	U.S. Geological Survey	USGS		65.9	-147.368	0.01				AAS	METAMORPHIC	UNKNOWN	UNKNOWN	MARBLE
CHZ125		USGS		Geochemistry of rock samples from the National Geochemical Database: U.S. Geological Survey, Reston, VA.	U.S. Geological Survey	USGS		65.9	-147.368	0.01				ES	METAMORPHIC	UNKNOWN	UNKNOWN	MARBLE																						1	1500	7			200
CHZ126		USGS		Geochemistry of rock samples from the National Geochemical Database: U.S. Geological Survey, Reston, VA.	U.S. Geological Survey	USGS		65.9	-147.368	0.01				ES	METAMORPHIC	UNKNOWN	UNKNOWN	MARBLE																						0.7	1000	5			50	5000
CHZ127		USGS		Geochemistry of rock samples from the National Geochemical Database: U.S. Geological Survey, Reston, VA.	U.S. Geological Survey	USGS		65.9	-147.368	0.01				AAS	METAMORPHIC	UNKNOWN	UNKNOWN	MARBLE
CHZ127		USGS		Geochemistry of rock samples from the National Geochemical Database: U.S. Geological Survey, Reston, VA.	U.S. Geological Survey	USGS		65.9	-147.368	0.01				ES	METAMORPHIC	UNKNOWN	UNKNOWN	MARBLE																						2	2000	20			150
D101547		USGS		Geochemistry of rock samples from the National Geochemical Database: U.S. Geological Survey, Reston, VA.	U.S. Geological Survey	USGS		39.7833	-121.133	0.01				UNKNOWN	METAMORPHIC	UNKNOWN	UNKNOWN	MARBLE		0.08		0.03	0.01		0.01			0.56	55.34			0.01	0.01											1.5
D103042		USGS		Geochemistry of rock samples from the National Geochemical Database: U.S. Geological Survey, Reston, VA.	U.S. Geological Survey	USGS		40.8732	-106.662	0.01	66	66	66	UNKNOWN	METAMORPHIC	UNKNOWN	UNKNOWN	MARBLE		42.53	0.1	9.51	1.3		0.63		0.2	2.02	27.56		0.16	3.32	0.02							1.5	1500			3					7
D123277		USGS		Geochemistry of rock samples from the National Geochemical Database: U.S. Geological Survey, Reston, VA.	U.S. Geological Survey	USGS		58.589	-136.14	0.01				ES	METAMORPHIC	UNKNOWN	UNKNOWN	MARBLE																						0.7	150			7
D123280		USGS		Geochemistry of rock samples from the National Geochemical Database: U.S. Geological Survey, Reston, VA.	U.S. Geological Survey	USGS		58.6293	-136.184	0.01				ES	METAMORPHIC	UNKNOWN	UNKNOWN	MARBLE																						0.3	100			5
D123281		USGS		Geochemistry of rock samples from the National Geochemical Database: U.S. Geological Survey, Reston, VA.	U.S. Geological Survey	USGS		58.6315	-136.185	0.01				ES	METAMORPHIC	UNKNOWN	UNKNOWN	MARBLE																						0.15	70			5
D123283		USGS		Geochemistry of rock samples from the National Geochemical Database: U.S. Geological Survey, Reston, VA.	U.S. Geological Survey	USGS		58.6015	-136.102	0.01				ES	METAMORPHIC	UNKNOWN	UNKNOWN	MARBLE																						0.05	30			3
D123286		USGS		Geochemistry of rock samples from the National Geochemical Database: U.S. Geological Survey, Reston, VA.	U.S. Geological Survey	USGS		58.6714	-136.061	0.01				ES	METAMORPHIC	UNKNOWN	UNKNOWN	MARBLE																						0.3	100			5
D123287		USGS		Geochemistry of rock samples from the National Geochemical Database: U.S. Geological Survey, Reston, VA.	U.S. Geological Survey	USGS		58.6715	-136.058	0.01				ES	METAMORPHIC	UNKNOWN	UNKNOWN	MARBLE																						5	700			50
D123289		USGS		Geochemistry of rock samples from the National Geochemical Database: U.S. Geological Survey, Reston, VA.	U.S. Geological Survey	USGS		58.6467	-136.048	0.01				ES	METAMORPHIC	UNKNOWN	UNKNOWN	MARBLE																						0.2	70			1
D124376		USGS		Geochemistry of rock samples from the National Geochemical Database: U.S. Geological Survey, Reston, VA.	U.S. Geological Survey	USGS		58.85	-136.483	0.01	55	64	73	ES	METAMORPHIC	UNKNOWN	UNKNOWN	MARBLE																						0.5	100			3
D123845		USGS		Geochemistry of rock samples from the National Geochemical Database: U.S. Geological Survey, Reston, VA.	U.S. Geological Survey	USGS		58.8768	-135.72	0.01	55	64	73	ES	METAMORPHIC	UNKNOWN	UNKNOWN	MARBLE																						1.5	1500	15	5	150
D124189		USGS		Geochemistry of rock samples from the National Geochemical Database: U.S. Geological Survey, Reston, VA.	U.S. Geological Survey	USGS		58.7833	-136.333	0.01	55	64	73	ES	METAMORPHIC	UNKNOWN	UNKNOWN	MARBLE																							500	300	300	1000
D124654		USGS		Geochemistry of rock samples from the National Geochemical Database: U.S. Geological Survey, Reston, VA.	U.S. Geological Survey	USGS		58.8833	-136.8	0.01	55	64	73	ES	METAMORPHIC	UNKNOWN	UNKNOWN	MARBLE																					2		70	300	500	300		200			0.3
D124939		USGS		Geochemistry of rock samples from the National Geochemical Database: U.S. Geological Survey, Reston, VA.	U.S. Geological Survey	USGS		59.142	-136.601	0.01				ES	METAMORPHIC	UNKNOWN	UNKNOWN	MARBLE																					5	7	700	200	30	500					3
D125284		USGS		Geochemistry of rock samples from the National Geochemical Database: U.S. Geological Survey, Reston, VA.	U.S. Geological Survey	USGS		58.6634	-136.318	0.01	55	64	73	ES	METAMORPHIC	UNKNOWN	UNKNOWN	MARBLE																					1	3	300	15	7	50					1.5
D125285		USGS		Geochemistry of rock samples from the National Geochemical Database: U.S. Geological Survey, Reston, VA.	U.S. Geological Survey	USGS		58.6634	-136.318	0.01	55	64	73	ES	METAMORPHIC	UNKNOWN	UNKNOWN	MARBLE																					7	5	700	10	10	50					2
D125289		USGS		Geochemistry of rock samples from the National Geochemical Database: U.S. Geological Survey, Reston, VA.	U.S. Geological Survey	USGS		58.3454	-136.14	0.01	55	64	73	ES	METAMORPHIC	UNKNOWN	UNKNOWN	MARBLE																						2	50	15	5	50					7
D125292		USGS		Geochemistry of rock samples from the National Geochemical Database: U.S. Geological Survey, Reston, VA.	U.S. Geological Survey	USGS		58.4333	-136.617	0.01	55	64	73	ES	METAMORPHIC	UNKNOWN	UNKNOWN	MARBLE																					7		1500	50	50	200					1.5
D126058		USGS		Geochemistry of rock samples from the National Geochemical Database: U.S. Geological Survey, Reston, VA.	U.S. Geological Survey	USGS		58.9862	-136.628	0.01				ES	METAMORPHIC	UNKNOWN	UNKNOWN	MARBLE																					7	1.5	70	3		7					5
D126743		USGS		Geochemistry of rock samples from the National Geochemical Database: U.S. Geological Survey, Reston, VA.	U.S. Geological Survey	USGS		39.2	-118.683	0.01	56	63.5	71	MISC	METAMORPHIC	UNKNOWN	UNKNOWN	MARBLE																	41.8
D126743		USGS		Geochemistry of rock samples from the National Geochemical Database: U.S. Geological Survey, Reston, VA.	U.S. Geological Survey	USGS		39.2	-118.683	0.01	56	63.5	71	UNKNOWN	METAMORPHIC	UNKNOWN	UNKNOWN	MARBLE		2.5		0.9	0.07					0.33	55										0.3	0.15	300			3					0.15
D127513		USGS		Geochemistry of rock samples from the National Geochemical Database: U.S. Geological Survey, Reston, VA.	U.S. Geological Survey	USGS		39.6333	-105.367	0.01	66	66	66	UNKNOWN	METAMORPHIC	UNKNOWN	UNKNOWN	MARBLE		33.2	0.09	8.4	4.8		0.56		0.14	1.8	34.6		0.18	0.04	0.05						7	2	1000			1					1.5
D129731		USGS		Geochemistry of rock samples from the National Geochemical Database: U.S. Geological Survey, Reston, VA.	U.S. Geological Survey	USGS		64.9	-165.983	0.01	66	66	66	ES	METAMORPHIC	UNKNOWN	UNKNOWN	MARBLE																					2	0.7	300	3		3					0.7
D129732		USGS		Geochemistry of rock samples from the National Geochemical Database: U.S. Geological Survey, Reston, VA.	U.S. Geological Survey	USGS		64.9	-165.983	0.01	66	66	66	ES	METAMORPHIC	UNKNOWN	UNKNOWN	MARBLE																						1.5	150	7	3	10					7
D130985		USGS		Geochemistry of rock samples from the National Geochemical Database: U.S. Geological Survey, Reston, VA.	U.S. Geological Survey	USGS		40.25	-116.5	0.01	43	43	43	MISC	METAMORPHIC	UNKNOWN	UNKNOWN	MARBLE																	7.5
D130987		USGS		Geochemistry of rock samples from the National Geochemical Database: U.S. Geological Survey, Reston, VA.	U.S. Geological Survey	USGS		40.25	-116.5	0.01	43	43	43	MISC	METAMORPHIC	UNKNOWN	UNKNOWN	MARBLE																	28.6
D130985		USGS		Geochemistry of rock samples from the National Geochemical Database: U.S. Geological Survey, Reston, VA.	U.S. Geological Survey	USGS		40.25	-116.5	0.01	43	43	43	UNKNOWN	METAMORPHIC	UNKNOWN	UNKNOWN	MARBLE		36		14.4			3.4			3.4	17		0.65	4.2	0.91							3	700	100	30	15					7
D130986		USGS		Geochemistry of rock samples from the National Geochemical Database: U.S. Geological Survey, Reston, VA.	U.S. Geological Survey	USGS		40.25	-116.5	0.01	43	43	43	MISC	METAMORPHIC	UNKNOWN	UNKNOWN	MARBLE																	39.3
D130986		USGS		Geochemistry of rock samples from the National Geochemical Database: U.S. Geological Survey, Reston, VA.	U.S. Geological Survey	USGS		40.25	-116.5	0.01	43	43	43	UNKNOWN	METAMORPHIC	UNKNOWN	UNKNOWN	MARBLE		9.22			0.33		0.21			1.2	46		0.02	0.4	0.13						1.5	0.3	150	7		7					1.5
D130987		USGS		Geochemistry of rock samples from the National Geochemical Database: U.S. Geological Survey, Reston, VA.	U.S. Geological Survey	USGS		40.25	-116.5	0.01	43	43	43	UNKNOWN	METAMORPHIC	UNKNOWN	UNKNOWN	MARBLE		20.9		4.8	0.7		0.53			6.3	32.8		0.02	1.15	0.21						7	0.7	150	15		7					2
D133227		USGS		Geochemistry of rock samples from the National Geochemical Database: U.S. Geological Survey, Reston, VA.	U.S. Geological Survey	USGS		65.575	-165.271	0.01	68	68.5	69	AAS	METAMORPHIC	UNKNOWN	UNKNOWN	MARBLE										14.6	30.1		0.05	0.13
D133227		USGS		Geochemistry of rock samples from the National Geochemical Database: U.S. Geological Survey, Reston, VA.	U.S. Geological Survey	USGS		65.575	-165.271	0.01	68	68.5	69	COL	METAMORPHIC	UNKNOWN	UNKNOWN	MARBLE		8.47	0.02	0.53	0.71				0.37						0.15
D133227		USGS		Geochemistry of rock samples from the National Geochemical Database: U.S. Geological Survey, Reston, VA.	U.S. Geological Survey	USGS		65.575	-165.271	0.01	68	68.5	69	ES	METAMORPHIC	UNKNOWN	UNKNOWN	MARBLE																					1.5	2	2000			10					0.3
D133227		USGS		Geochemistry of rock samples from the National Geochemical Database: U.S. Geological Survey, Reston, VA.	U.S. Geological Survey	USGS		65.575	-165.271	0.01	68	68.5	69	ISE	METAMORPHIC	UNKNOWN	UNKNOWN	MARBLE
D133227		USGS		Geochemistry of rock samples from the National Geochemical Database: U.S. Geological Survey, Reston, VA.	U.S. Geological Survey	USGS		65.575	-165.271	0.01	68	68.5	69	TITR	METAMORPHIC	UNKNOWN	UNKNOWN	MARBLE							3.19
D133228		USGS		Geochemistry of rock samples from the National Geochemical Database: U.S. Geological Survey, Reston, VA.	U.S. Geological Survey	USGS		65.575	-165.271	0.01	68	68.5	69	AAS	METAMORPHIC	UNKNOWN	UNKNOWN	MARBLE										14.3	28.7		0.04	0.17
D133228		USGS		Geochemistry of rock samples from the National Geochemical Database: U.S. Geological Survey, Reston, VA.	U.S. Geological Survey	USGS		65.575	-165.271	0.01	68	68.5	69	COL	METAMORPHIC	UNKNOWN	UNKNOWN	MARBLE		11.1	0.03	0.76	1.15				0.35						0.02
D133228		USGS		Geochemistry of rock samples from the National Geochemical Database: U.S. Geological Survey, Reston, VA.	U.S. Geological Survey	USGS		65.575	-165.271	0.01	68	68.5	69	ES	METAMORPHIC	UNKNOWN	UNKNOWN	MARBLE																					2	2	2000	5		15					0.5
D133228		USGS		Geochemistry of rock samples from the National Geochemical Database: U.S. Geological Survey, Reston, VA.	U.S. Geological Survey	USGS		65.575	-165.271	0.01	68	68.5	69	ISE	METAMORPHIC	UNKNOWN	UNKNOWN	MARBLE
D133228		USGS		Geochemistry of rock samples from the National Geochemical Database: U.S. Geological Survey, Reston, VA.	U.S. Geological Survey	USGS		65.575	-165.271	0.01	68	68.5	69	TITR	METAMORPHIC	UNKNOWN	UNKNOWN	MARBLE							2.92
D133229		USGS		Geochemistry of rock samples from the National Geochemical Database: U.S. Geological Survey, Reston, VA.	U.S. Geological Survey	USGS		65.575	-165.271	0.01	68	68.5	69	AAS	METAMORPHIC	UNKNOWN	UNKNOWN	MARBLE										8.71	16.6		0.08	1.85
D133229		USGS		Geochemistry of rock samples from the National Geochemical Database: U.S. Geological Survey, Reston, VA.	U.S. Geological Survey	USGS		65.575	-165.271	0.01	68	68.5	69	COL	METAMORPHIC	UNKNOWN	UNKNOWN	MARBLE		39.5	0.26	5.83	0.62				0.1						0.08
D133229		USGS		Geochemistry of rock samples from the National Geochemical Database: U.S. Geological Survey, Reston, VA.	U.S. Geological Survey	USGS		65.575	-165.271	0.01	68	68.5	69	ES	METAMORPHIC	UNKNOWN	UNKNOWN	MARBLE																					10	1.5	700	10		100					3
D133229		USGS		Geochemistry of rock samples from the National Geochemical Database: U.S. Geological Survey, Reston, VA.	U.S. Geological Survey	USGS		65.575	-165.271	0.01	68	68.5	69	ISE	METAMORPHIC	UNKNOWN	UNKNOWN	MARBLE
D133229		USGS		Geochemistry of rock samples from the National Geochemical Database: U.S. Geological Survey, Reston, VA.	U.S. Geological Survey	USGS		65.575	-165.271	0.01	68	68.5	69	TITR	METAMORPHIC	UNKNOWN	UNKNOWN	MARBLE							2.16
D133230		USGS		Geochemistry of rock samples from the National Geochemical Database: U.S. Geological Survey, Reston, VA.	U.S. Geological Survey	USGS		65.575	-165.271	0.01	68	68.5	69	AAS	METAMORPHIC	UNKNOWN	UNKNOWN	MARBLE										2.37	33.3		0.49	1.03
D133230		USGS		Geochemistry of rock samples from the National Geochemical Database: U.S. Geological Survey, Reston, VA.	U.S. Geological Survey	USGS		65.575	-165.271	0.01	68	68.5	69	COL	METAMORPHIC	UNKNOWN	UNKNOWN	MARBLE		27.6	0.19	4.12	0.76				0.05						0.06
D133230		USGS		Geochemistry of rock samples from the National Geochemical Database: U.S. Geological Survey, Reston, VA.	U.S. Geological Survey	USGS		65.575	-165.271	0.01	68	68.5	69	ES	METAMORPHIC	UNKNOWN	UNKNOWN	MARBLE																					7	0.7	300	5		7					1.5
D133230		USGS		Geochemistry of rock samples from the National Geochemical Database: U.S. Geological Survey, Reston, VA.	U.S. Geological Survey	USGS		65.575	-165.271	0.01	68	68.5	69	ISE	METAMORPHIC	UNKNOWN	UNKNOWN	MARBLE
D133230		USGS		Geochemistry of rock samples from the National Geochemical Database: U.S. Geological Survey, Reston, VA.	U.S. Geological Survey	USGS		65.575	-165.271	0.01	68	68.5	69	TITR	METAMORPHIC	UNKNOWN	UNKNOWN	MARBLE							0.66
D141465		USGS		Geochemistry of rock samples from the National Geochemical Database: U.S. Geological Survey, Reston, VA.	U.S. Geological Survey	USGS		37.6833	-118.517	0.01	43	43	43	UNKNOWN	METAMORPHIC	UNKNOWN	UNKNOWN	MARBLE		4.8		0.9					0.01	0.78	50.4		0.11	0.05
D141466		USGS		Geochemistry of rock samples from the National Geochemical Database: U.S. Geological Survey, Reston, VA.	U.S. Geological Survey	USGS		37.6833	-118.517	0.01	43	43	43	UNKNOWN	METAMORPHIC	UNKNOWN	UNKNOWN	MARBLE		3.6		1.2					0.07	0.65	50.4		0.11	0.21
D142155		USGS		Geochemistry of rock samples from the National Geochemical Database: U.S. Geological Survey, Reston, VA.	U.S. Geological Survey	USGS		64.5	-166	0.01				ES	METAMORPHIC	UNKNOWN	UNKNOWN	MARBLE																					0.03	0.007	5								0.03
D144398		USGS		Geochemistry of rock samples from the National Geochemical Database: U.S. Geological Survey, Reston, VA.	U.S. Geological Survey	USGS		64.7	-165.767	0.01	50	60.5	71	ES	METAMORPHIC	UNKNOWN	UNKNOWN	MARBLE																					0.5	0.07	30			1					0.2
D144387		USGS		Geochemistry of rock samples from the National Geochemical Database: U.S. Geological Survey, Reston, VA.	U.S. Geological Survey	USGS		64.7	-165.767	0.01	50	60.5	71	AAS	METAMORPHIC	UNKNOWN	UNKNOWN	MARBLE
D144387		USGS		Geochemistry of rock samples from the National Geochemical Database: U.S. Geological Survey, Reston, VA.	U.S. Geological Survey	USGS		64.7	-165.767	0.01	50	60.5	71	ES	METAMORPHIC	UNKNOWN	UNKNOWN	MARBLE																					1.5	0.07	100			1					0.15
D144398		USGS		Geochemistry of rock samples from the National Geochemical Database: U.S. Geological Survey, Reston, VA.	U.S. Geological Survey	USGS		64.7	-165.767	0.01	50	60.5	71	AAS	METAMORPHIC	UNKNOWN	UNKNOWN	MARBLE
D154631		USGS		Geochemistry of rock samples from the National Geochemical Database: U.S. Geological Survey, Reston, VA.	U.S. Geological Survey	USGS		65.5	-165	0.01	65	65	65	AAS	METAMORPHIC	UNKNOWN	UNKNOWN	MARBLE
D154631		USGS		Geochemistry of rock samples from the National Geochemical Database: U.S. Geological Survey, Reston, VA.	U.S. Geological Survey	USGS		65.5	-165	0.01	65	65	65	ES	METAMORPHIC	UNKNOWN	UNKNOWN	MARBLE																					0.07	0.15	150			1.5					0.03
D154836		USGS		Geochemistry of rock samples from the National Geochemical Database: U.S. Geological Survey, Reston, VA.	U.S. Geological Survey	USGS		40.875	-106.625	0.01	66	66	66	UNKNOWN	METAMORPHIC	UNKNOWN	UNKNOWN	MARBLE																						3	1500	150	50	300					7
D160024		USGS		Geochemistry of rock samples from the National Geochemical Database: U.S. Geological Survey, Reston, VA.	U.S. Geological Survey	USGS		41.1167	-106.25	0.01	66	66	66	UNKNOWN	METAMORPHIC	UNKNOWN	UNKNOWN	MARBLE		26.5	0.57	8	1.1		3.6		0.12	1.9	32.1		2.1	1.4	0.13
D160924		USGS		Geochemistry of rock samples from the National Geochemical Database: U.S. Geological Survey, Reston, VA.	U.S. Geological Survey	USGS		41.1167	-106.25	0.01	66	66	66	UNKNOWN	METAMORPHIC	UNKNOWN	UNKNOWN	MARBLE		17.7	0.01	0.05	1.5		0.12		0.02	21	28.2		0.58	0.1	0.03						6.36	0.802	724			8.94					0.0615
D160927		USGS		Geochemistry of rock samples from the National Geochemical Database: U.S. Geological Survey, Reston, VA.	U.S. Geological Survey	USGS		41.1167	-106.25	0.01	66	66	66	UNKNOWN	METAMORPHIC	UNKNOWN	UNKNOWN	MARBLE		24	0.01	0.06	0.65		0.28			18.2	28.4		0.37	0.07							10.5	0.403	347			21.5					0.0404
D160931		USGS		Geochemistry of rock samples from the National Geochemical Database: U.S. Geological Survey, Reston, VA.	U.S. Geological Survey	USGS		41.1167	-106.25	0.01	66	66	66	UNKNOWN	METAMORPHIC	UNKNOWN	UNKNOWN	MARBLE		4.1	0.01	0.03	0.69		0.16			20.4	29.2		0.21	0.07	0.01						1.11	0.396	363	2.77	1.12	21.5					0.09
D183010		USGS		Geochemistry of rock samples from the National Geochemical Database: U.S. Geological Survey, Reston, VA.	U.S. Geological Survey	USGS		38.5833	-106.033	0.01	66	66	66	UNKNOWN	METAMORPHIC	UNKNOWN	UNKNOWN	MARBLE																					7	1.5	2000			100		300			2
D183545		USGS		Geochemistry of rock samples from the National Geochemical Database: U.S. Geological Survey, Reston, VA.	U.S. Geological Survey	USGS		38.6725	-105.544	0.01	66	66	66	UNKNOWN	METAMORPHIC	UNKNOWN	UNKNOWN	MARBLE																						3	1000			3		700			7
D183559		USGS		Geochemistry of rock samples from the National Geochemical Database: U.S. Geological Survey, Reston, VA.	U.S. Geological Survey	USGS		38.5833	-106.033	0.01	66	66	66	UNKNOWN	METAMORPHIC	UNKNOWN	UNKNOWN	MARBLE																					10	2	7000			20					3
D188232		USGS		Geochemistry of rock samples from the National Geochemical Database: U.S. Geological Survey, Reston, VA.	U.S. Geological Survey	USGS		41.3167	-73.95	0.01	66	66	66	MISC	METAMORPHIC	UNKNOWN	UNKNOWN	MARBLE																	42.4
D188232		USGS		Geochemistry of rock samples from the National Geochemical Database: U.S. Geological Survey, Reston, VA.	U.S. Geological Survey	USGS		41.3167	-73.95	0.01	66	66	66	UNKNOWN	METAMORPHIC	UNKNOWN	UNKNOWN	MARBLE							1.21		0.137		54.5										0.07			20		20					0.05
D188232		USGS		Geochemistry of rock samples from the National Geochemical Database: U.S. Geological Survey, Reston, VA.	U.S. Geological Survey	USGS		41.3167	-73.95	0.01	66	66	66	XRF	METAMORPHIC	UNKNOWN	UNKNOWN	MARBLE		0.26		0.14					0.08	1.46	52.9
D194322		USGS		Geochemistry of rock samples from the National Geochemical Database: U.S. Geological Survey, Reston, VA.	U.S. Geological Survey	USGS		34.6058	-116.556	0.01	43	43	43	UNKNOWN	METAMORPHIC	UNKNOWN	UNKNOWN	MARBLE																						0.35	130	20	1.6	1.3		160			0.58
D195158		USGS		Geochemistry of rock samples from the National Geochemical Database: U.S. Geological Survey, Reston, VA.	U.S. Geological Survey	USGS		64.75	-163.083	0.01	66	66	66	DNAA	METAMORPHIC	UNKNOWN	UNKNOWN	MARBLE
D195159		USGS		Geochemistry of rock samples from the National Geochemical Database: U.S. Geological Survey, Reston, VA.	U.S. Geological Survey	USGS		64.75	-163.083	0.01	66	66	66	DNAA	METAMORPHIC	UNKNOWN	UNKNOWN	MARBLE
D195161		USGS		Geochemistry of rock samples from the National Geochemical Database: U.S. Geological Survey, Reston, VA.	U.S. Geological Survey	USGS		64.75	-163.083	0.01	66	66	66	DNAA	METAMORPHIC	UNKNOWN	UNKNOWN	MARBLE
D195162		USGS		Geochemistry of rock samples from the National Geochemical Database: U.S. Geological Survey, Reston, VA.	U.S. Geological Survey	USGS		64.75	-163.083	0.01	66	66	66	DNAA	METAMORPHIC	UNKNOWN	UNKNOWN	MARBLE
D195163		USGS		Geochemistry of rock samples from the National Geochemical Database: U.S. Geological Survey, Reston, VA.	U.S. Geological Survey	USGS		64.75	-163.083	0.01	66	66	66	DNAA	METAMORPHIC	UNKNOWN	UNKNOWN	MARBLE
D195164		USGS		Geochemistry of rock samples from the National Geochemical Database: U.S. Geological Survey, Reston, VA.	U.S. Geological Survey	USGS		64.75	-163.083	0.01	66	66	66	DNAA	METAMORPHIC	UNKNOWN	UNKNOWN	MARBLE
D195165		USGS		Geochemistry of rock samples from the National Geochemical Database: U.S. Geological Survey, Reston, VA.	U.S. Geological Survey	USGS		64.75	-163.083	0.01	66	66	66	DNAA	METAMORPHIC	UNKNOWN	UNKNOWN	MARBLE
D195168		USGS		Geochemistry of rock samples from the National Geochemical Database: U.S. Geological Survey, Reston, VA.	U.S. Geological Survey	USGS		64.7833	-163.067	0.01	66	66	66	DNAA	METAMORPHIC	UNKNOWN	UNKNOWN	MARBLE
D195169		USGS		Geochemistry of rock samples from the National Geochemical Database: U.S. Geological Survey, Reston, VA.	U.S. Geological Survey	USGS		64.7833	-163.067	0.01	66	66	66	DNAA	METAMORPHIC	UNKNOWN	UNKNOWN	MARBLE
D196233		USGS		Geochemistry of rock samples from the National Geochemical Database: U.S. Geological Survey, Reston, VA.	U.S. Geological Survey	USGS		39.0322	-105.413	0.01	72	72	72	UNKNOWN	METAMORPHIC	UNKNOWN	UNKNOWN	MARBLE																					3	1.5	300	7		70					1.5
D207071		USGS		Geochemistry of rock samples from the National Geochemical Database: U.S. Geological Survey, Reston, VA.	U.S. Geological Survey	USGS		39.7247	-113.942	0.01	67	69.5	72	UNKNOWN	METAMORPHIC	UNKNOWN	UNKNOWN	MARBLE																						0.07	310	13	8.7	4.5		320			0.43
D207076		USGS		Geochemistry of rock samples from the National Geochemical Database: U.S. Geological Survey, Reston, VA.	U.S. Geological Survey	USGS		39.735	-113.942	0.01	67	69.5	72	UNKNOWN	METAMORPHIC	UNKNOWN	UNKNOWN	MARBLE																						0.65	280	18	8.4	8.3		240			2.3
D207088		USGS		Geochemistry of rock samples from the National Geochemical Database: U.S. Geological Survey, Reston, VA.	U.S. Geological Survey	USGS		39.7506	-113.885	0.01	67	69.5	72	UNKNOWN	METAMORPHIC	UNKNOWN	UNKNOWN	MARBLE																							520	10	5.7	2.5		63
D207414		USGS		Geochemistry of rock samples from the National Geochemical Database: U.S. Geological Survey, Reston, VA.	U.S. Geological Survey	USGS		46.3833	-89.3833	0.01	72	72	72	UNKNOWN	METAMORPHIC	UNKNOWN	UNKNOWN	MARBLE																					23		610	8.9	3.9	50					0.45
D226038		USGS		Geochemistry of rock samples from the National Geochemical Database: U.S. Geological Survey, Reston, VA.	U.S. Geological Survey	USGS		56.4347	-132.105	0.01	65	65	65	DNAA	METAMORPHIC	UNKNOWN	UNKNOWN	MARBLE
D226195		USGS		Geochemistry of rock samples from the National Geochemical Database: U.S. Geological Survey, Reston, VA.	U.S. Geological Survey	USGS		56.0467	-133.705	0.01	43	43	43	DNAA	METAMORPHIC	UNKNOWN	UNKNOWN	MARBLE
D226251		USGS		Geochemistry of rock samples from the National Geochemical Database: U.S. Geological Survey, Reston, VA.	U.S. Geological Survey	USGS		56.1644	-133.351	0.01	43	43	43	DNAA	METAMORPHIC	UNKNOWN	UNKNOWN	MARBLE
D233666		USGS		Geochemistry of rock samples from the National Geochemical Database: U.S. Geological Survey, Reston, VA.	U.S. Geological Survey	USGS		56.7942	-133.362	0.01	43	43	43	DNAA	METAMORPHIC	UNKNOWN	UNKNOWN	MARBLE
D235744		USGS		Geochemistry of rock samples from the National Geochemical Database: U.S. Geological Survey, Reston, VA.	U.S. Geological Survey	USGS		41.875	-105.25	0.01	66	66	66	ES	METAMORPHIC	UNKNOWN	UNKNOWN	MARBLE																						1	5000	15		7					2
D235744		USGS		Geochemistry of rock samples from the National Geochemical Database: U.S. Geological Survey, Reston, VA.	U.S. Geological Survey	USGS		41.875	-105.25	0.01	66	66	66	MISC	METAMORPHIC	UNKNOWN	UNKNOWN	MARBLE
D235744		USGS		Geochemistry of rock samples from the National Geochemical Database: U.S. Geological Survey, Reston, VA.	U.S. Geological Survey	USGS		41.875	-105.25	0.01	66	66	66	UNKNOWN	METAMORPHIC	UNKNOWN	UNKNOWN	MARBLE							1.26
D235744		USGS		Geochemistry of rock samples from the National Geochemical Database: U.S. Geological Survey, Reston, VA.	U.S. Geological Survey	USGS		41.875	-105.25	0.01	66	66	66	XRF	METAMORPHIC	UNKNOWN	UNKNOWN	MARBLE		30.6	0.21	3.78					0.72	0.96	34.3			0.86
D240844		USGS		Geochemistry of rock samples from the National Geochemical Database: U.S. Geological Survey, Reston, VA.	U.S. Geological Survey	USGS		34.5	-118.95	0.01	3	23.5	44	XRF	METAMORPHIC	UNKNOWN	UNKNOWN	MARBLE		1.63		0.71						3.06	52.3			0.07
D240845		USGS		Geochemistry of rock samples from the National Geochemical Database: U.S. Geological Survey, Reston, VA.	U.S. Geological Survey	USGS		34.5	-118.95	0.01	3	23.5	44	XRF	METAMORPHIC	UNKNOWN	UNKNOWN	MARBLE		0.5		0.41						0.77	55.3			0.07	0.13
D241188		USGS		Geochemistry of rock samples from the National Geochemical Database: U.S. Geological Survey, Reston, VA.	U.S. Geological Survey	USGS		34.8731	-119.211	0.01				DNAA	METAMORPHIC	UNKNOWN	UNKNOWN	MARBLE
D241194		USGS		Geochemistry of rock samples from the National Geochemical Database: U.S. Geological Survey, Reston, VA.	U.S. Geological Survey	USGS		34.8719	-119.209	0.01				DNAA	METAMORPHIC	UNKNOWN	UNKNOWN	MARBLE
D245374		USGS		Geochemistry of rock samples from the National Geochemical Database: U.S. Geological Survey, Reston, VA.	U.S. Geological Survey	USGS		41.21	-107.091	0.01	66	66	66	ES	METAMORPHIC	UNKNOWN	UNKNOWN	MARBLE																						1.5	1000	20	7	50		500			3
D245380		USGS		Geochemistry of rock samples from the National Geochemical Database: U.S. Geological Survey, Reston, VA.	U.S. Geological Survey	USGS		41.0597	-106.979	0.01	66	66	66	ES	METAMORPHIC	UNKNOWN	UNKNOWN	MARBLE																					7	7	1500		15	70					1.5
D253524		USGS		Geochemistry of rock samples from the National Geochemical Database: U.S. Geological Survey, Reston, VA.	U.S. Geological Survey	USGS		41.75	-105	0.01	66	66	66	MISC	METAMORPHIC	UNKNOWN	UNKNOWN	MARBLE
D253524		USGS		Geochemistry of rock samples from the National Geochemical Database: U.S. Geological Survey, Reston, VA.	U.S. Geological Survey	USGS		41.75	-105	0.01	66	66	66	NAA	METAMORPHIC	UNKNOWN	UNKNOWN	MARBLE																						0.385			0.607			24.5
D253524		USGS		Geochemistry of rock samples from the National Geochemical Database: U.S. Geological Survey, Reston, VA.	U.S. Geological Survey	USGS		41.75	-105	0.01	66	66	66	UNKNOWN	METAMORPHIC	UNKNOWN	UNKNOWN	MARBLE							0.2
D253524		USGS		Geochemistry of rock samples from the National Geochemical Database: U.S. Geological Survey, Reston, VA.	U.S. Geological Survey	USGS		41.75	-105	0.01	66	66	66	XRF	METAMORPHIC	UNKNOWN	UNKNOWN	MARBLE		5.55		0.33						19.2	31.8			0.07
D262365		USGS		Geochemistry of rock samples from the National Geochemical Database: U.S. Geological Survey, Reston, VA.	U.S. Geological Survey	USGS		41.3333	-74.0833	0.01	72	72	72	DNAA	METAMORPHIC	UNKNOWN	UNKNOWN	MARBLE
D262365		USGS		Geochemistry of rock samples from the National Geochemical Database: U.S. Geological Survey, Reston, VA.	U.S. Geological Survey	USGS		41.3333	-74.0833	0.01	72	72	72	ICPAES	METAMORPHIC	UNKNOWN	UNKNOWN	MARBLE																						1.8	1700		6	2		110			0.4
D262365		USGS		Geochemistry of rock samples from the National Geochemical Database: U.S. Geological Survey, Reston, VA.	U.S. Geological Survey	USGS		41.3333	-74.0833	0.01	72	72	72	UNKNOWN	METAMORPHIC	UNKNOWN	UNKNOWN	MARBLE							2.03
D262365		USGS		Geochemistry of rock samples from the National Geochemical Database: U.S. Geological Survey, Reston, VA.	U.S. Geological Survey	USGS		41.3333	-74.0833	0.01	72	72	72	XRF	METAMORPHIC	UNKNOWN	UNKNOWN	MARBLE		15.7		0.78					0.2	3.82	47.4			0.08	0.14
D283480		USGS		Geochemistry of rock samples from the National Geochemical Database: U.S. Geological Survey, Reston, VA.	U.S. Geological Survey	USGS		42.1879	-105.342	0.01	66	66	66	MISC	METAMORPHIC	UNKNOWN	UNKNOWN	MARBLE							0.59
D283480		USGS		Geochemistry of rock samples from the National Geochemical Database: U.S. Geological Survey, Reston, VA.	U.S. Geological Survey	USGS		42.1879	-105.342	0.01	66	66	66	NAA	METAMORPHIC	UNKNOWN	UNKNOWN	MARBLE																						2.31			6.4			80	120
D283480		USGS		Geochemistry of rock samples from the National Geochemical Database: U.S. Geological Survey, Reston, VA.	U.S. Geological Survey	USGS		42.1879	-105.342	0.01	66	66	66	XRF	METAMORPHIC	UNKNOWN	UNKNOWN	MARBLE		11.5		1.39					1.37	0.97	45.2			0.43
D283487		USGS		Geochemistry of rock samples from the National Geochemical Database: U.S. Geological Survey, Reston, VA.	U.S. Geological Survey	USGS		41.625	-105.5	0.01	66	66	66	MISC	METAMORPHIC	UNKNOWN	UNKNOWN	MARBLE							0.14
D283487		USGS		Geochemistry of rock samples from the National Geochemical Database: U.S. Geological Survey, Reston, VA.	U.S. Geological Survey	USGS		41.625	-105.5	0.01	66	66	66	NAA	METAMORPHIC	UNKNOWN	UNKNOWN	MARBLE																						0.17			0.41			2.9
D283487		USGS		Geochemistry of rock samples from the National Geochemical Database: U.S. Geological Survey, Reston, VA.	U.S. Geological Survey	USGS		41.625	-105.5	0.01	66	66	66	XRF	METAMORPHIC	UNKNOWN	UNKNOWN	MARBLE		1.26		0.11						0.38	56.3			0.04
D283488		USGS		Geochemistry of rock samples from the National Geochemical Database: U.S. Geological Survey, Reston, VA.	U.S. Geological Survey	USGS		41.625	-105.5	0.01	66	66	66	MISC	METAMORPHIC	UNKNOWN	UNKNOWN	MARBLE							0.28
D283488		USGS		Geochemistry of rock samples from the National Geochemical Database: U.S. Geological Survey, Reston, VA.	U.S. Geological Survey	USGS		41.625	-105.5	0.01	66	66	66	NAA	METAMORPHIC	UNKNOWN	UNKNOWN	MARBLE																						0.789			3.7			18
D283488		USGS		Geochemistry of rock samples from the National Geochemical Database: U.S. Geological Survey, Reston, VA.	U.S. Geological Survey	USGS		41.625	-105.5	0.01	66	66	66	XRF	METAMORPHIC	UNKNOWN	UNKNOWN	MARBLE		17.1		1.02						17.3	32.5			0.14
D283489		USGS		Geochemistry of rock samples from the National Geochemical Database: U.S. Geological Survey, Reston, VA.	U.S. Geological Survey	USGS		41.625	-105.5	0.01	66	66	66	MISC	METAMORPHIC	UNKNOWN	UNKNOWN	MARBLE							0.18
D283489		USGS		Geochemistry of rock samples from the National Geochemical Database: U.S. Geological Survey, Reston, VA.	U.S. Geological Survey	USGS		41.625	-105.5	0.01	66	66	66	NAA	METAMORPHIC	UNKNOWN	UNKNOWN	MARBLE																						0.718			2.5			64	2.1
D283489		USGS		Geochemistry of rock samples from the National Geochemical Database: U.S. Geological Survey, Reston, VA.	U.S. Geological Survey	USGS		41.625	-105.5	0.01	66	66	66	XRF	METAMORPHIC	UNKNOWN	UNKNOWN	MARBLE		9.48		0.28					0.05	16.4	35.8
D283802		USGS		Geochemistry of rock samples from the National Geochemical Database: U.S. Geological Survey, Reston, VA.	U.S. Geological Survey	USGS		39.4164	-114.153	0.01				ES	METAMORPHIC	UNKNOWN	UNKNOWN	MARBLE																							10
D283803		USGS		Geochemistry of rock samples from the National Geochemical Database: U.S. Geological Survey, Reston, VA.	U.S. Geological Survey	USGS		39.4356	-114.138	0.01				ES	METAMORPHIC	UNKNOWN	UNKNOWN	MARBLE																							50
D283805		USGS		Geochemistry of rock samples from the National Geochemical Database: U.S. Geological Survey, Reston, VA.	U.S. Geological Survey	USGS		39.4439	-114.145	0.01				ES	METAMORPHIC	UNKNOWN	UNKNOWN	MARBLE																							10
D283806		USGS		Geochemistry of rock samples from the National Geochemical Database: U.S. Geological Survey, Reston, VA.	U.S. Geological Survey	USGS		39.4453	-114.18	0.01				ES	METAMORPHIC	UNKNOWN	UNKNOWN	MARBLE																							30
D288947		USGS		Geochemistry of rock samples from the National Geochemical Database: U.S. Geological Survey, Reston, VA.	U.S. Geological Survey	USGS		39.3211	-118.117	0.01				ES	METAMORPHIC	UNKNOWN	UNKNOWN	MARBLE																						0.07	150			7				1
D288949		USGS		Geochemistry of rock samples from the National Geochemical Database: U.S. Geological Survey, Reston, VA.	U.S. Geological Survey	USGS		39.3211	-118.117	0.01				AAS	METAMORPHIC	UNKNOWN	UNKNOWN	MARBLE
D288949		USGS		Geochemistry of rock samples from the National Geochemical Database: U.S. Geological Survey, Reston, VA.	U.S. Geological Survey	USGS		39.3211	-118.117	0.01				ES	METAMORPHIC	UNKNOWN	UNKNOWN	MARBLE																						0.15	150			7
D289230		USGS		Geochemistry of rock samples from the National Geochemical Database: U.S. Geological Survey, Reston, VA.	U.S. Geological Survey	USGS		40	-119.217	0.01	44	44	44	AAS	METAMORPHIC	UNKNOWN	UNKNOWN	MARBLE																											1.1	35	16
D289230		USGS		Geochemistry of rock samples from the National Geochemical Database: U.S. Geological Survey, Reston, VA.	U.S. Geological Survey	USGS		40	-119.217	0.01	44	44	44	ES	METAMORPHIC	UNKNOWN	UNKNOWN	MARBLE																						2	1000	10	15	50				7
D289230		USGS		Geochemistry of rock samples from the National Geochemical Database: U.S. Geological Survey, Reston, VA.	U.S. Geological Survey	USGS		40	-119.217	0.01	44	44	44	MISC	METAMORPHIC	UNKNOWN	UNKNOWN	MARBLE
D309446		USGS		Geochemistry of rock samples from the National Geochemical Database: U.S. Geological Survey, Reston, VA.	U.S. Geological Survey	USGS		60.35	-160.127	0.01				AAS	METAMORPHIC	UNKNOWN	UNKNOWN	MARBLE
D309446		USGS		Geochemistry of rock samples from the National Geochemical Database: U.S. Geological Survey, Reston, VA.	U.S. Geological Survey	USGS		60.35	-160.127	0.01				ES	METAMORPHIC	UNKNOWN	UNKNOWN	MARBLE																						0.07	70
D309446		USGS		Geochemistry of rock samples from the National Geochemical Database: U.S. Geological Survey, Reston, VA.	U.S. Geological Survey	USGS		60.35	-160.127	0.01				ICPAES	METAMORPHIC	UNKNOWN	UNKNOWN	MARBLE																											0.5	13
D314148		USGS		Geochemistry of rock samples from the National Geochemical Database: U.S. Geological Survey, Reston, VA.	U.S. Geological Survey	USGS		37.3	-119.15	0.01	43	43	43	TITR	METAMORPHIC	UNKNOWN	UNKNOWN	MARBLE							0.03
D314148		USGS		Geochemistry of rock samples from the National Geochemical Database: U.S. Geological Survey, Reston, VA.	U.S. Geological Survey	USGS		37.3	-119.15	0.01	43	43	43	XRF	METAMORPHIC	UNKNOWN	UNKNOWN	MARBLE		0.22								21.3	31.7
D316144		USGS		Geochemistry of rock samples from the National Geochemical Database: U.S. Geological Survey, Reston, VA.	U.S. Geological Survey	USGS		35.7833	-113.533	0.01	72	72	72	AAS	METAMORPHIC	UNKNOWN	UNKNOWN	MARBLE																													0.5
D316144		USGS		Geochemistry of rock samples from the National Geochemical Database: U.S. Geological Survey, Reston, VA.	U.S. Geological Survey	USGS		35.7833	-113.533	0.01	72	72	72	ES	METAMORPHIC	UNKNOWN	UNKNOWN	MARBLE																						0.5	1000
D316144		USGS		Geochemistry of rock samples from the National Geochemical Database: U.S. Geological Survey, Reston, VA.	U.S. Geological Survey	USGS		35.7833	-113.533	0.01	72	72	72	ICPAES	METAMORPHIC	UNKNOWN	UNKNOWN	MARBLE																						0.4	1100		5	6		20			0.05
D316144		USGS		Geochemistry of rock samples from the National Geochemical Database: U.S. Geological Survey, Reston, VA.	U.S. Geological Survey	USGS		35.7833	-113.533	0.01	72	72	72	MISC	METAMORPHIC	UNKNOWN	UNKNOWN	MARBLE
D316144		USGS		Geochemistry of rock samples from the National Geochemical Database: U.S. Geological Survey, Reston, VA.	U.S. Geological Survey	USGS		35.7833	-113.533	0.01	72	72	72	NAA	METAMORPHIC	UNKNOWN	UNKNOWN	MARBLE																						0.377		1.7	1.42			16
D316144		USGS		Geochemistry of rock samples from the National Geochemical Database: U.S. Geological Survey, Reston, VA.	U.S. Geological Survey	USGS		35.7833	-113.533	0.01	72	72	72	TITR	METAMORPHIC	UNKNOWN	UNKNOWN	MARBLE							0.44
D316144		USGS		Geochemistry of rock samples from the National Geochemical Database: U.S. Geological Survey, Reston, VA.	U.S. Geological Survey	USGS		35.7833	-113.533	0.01	72	72	72	XRF	METAMORPHIC	UNKNOWN	UNKNOWN	MARBLE		7.35							0.11	0.52	52.3				0.07									30				6
D321080		USGS		Geochemistry of rock samples from the National Geochemical Database: U.S. Geological Survey, Reston, VA.	U.S. Geological Survey	USGS		39.0744	-119.645	0.01				AAS	METAMORPHIC	UNKNOWN	UNKNOWN	MARBLE
D321080		USGS		Geochemistry of rock samples from the National Geochemical Database: U.S. Geological Survey, Reston, VA.	U.S. Geological Survey	USGS		39.0744	-119.645	0.01				ES	METAMORPHIC	UNKNOWN	UNKNOWN	MARBLE																						0.7	5000	7	10	20
D321080		USGS		Geochemistry of rock samples from the National Geochemical Database: U.S. Geological Survey, Reston, VA.	U.S. Geological Survey	USGS		39.0744	-119.645	0.01				ICPAES	METAMORPHIC	UNKNOWN	UNKNOWN	MARBLE																											0.2		16
D326504		USGS		Geochemistry of rock samples from the National Geochemical Database: U.S. Geological Survey, Reston, VA.	U.S. Geological Survey	USGS		40.8	-117.483	0.01	3	35	67	ISE	METAMORPHIC	UNKNOWN	UNKNOWN	MARBLE
D326504		USGS		Geochemistry of rock samples from the National Geochemical Database: U.S. Geological Survey, Reston, VA.	U.S. Geological Survey	USGS		40.8	-117.483	0.01	3	35	67	AAS	METAMORPHIC	UNKNOWN	UNKNOWN	MARBLE																													6.2
D326504		USGS		Geochemistry of rock samples from the National Geochemical Database: U.S. Geological Survey, Reston, VA.	U.S. Geological Survey	USGS		40.8	-117.483	0.01	3	35	67	MISC	METAMORPHIC	UNKNOWN	UNKNOWN	MARBLE
D326504		USGS		Geochemistry of rock samples from the National Geochemical Database: U.S. Geological Survey, Reston, VA.	U.S. Geological Survey	USGS		40.8	-117.483	0.01	3	35	67	NAA	METAMORPHIC	UNKNOWN	UNKNOWN	MARBLE																						1.87		17	6.58			87.4
D326527		USGS		Geochemistry of rock samples from the National Geochemical Database: U.S. Geological Survey, Reston, VA.	U.S. Geological Survey	USGS		40.8	-117.483	0.01	3	35	67	AAS	METAMORPHIC	UNKNOWN	UNKNOWN	MARBLE																													1.8
D326527		USGS		Geochemistry of rock samples from the National Geochemical Database: U.S. Geological Survey, Reston, VA.	U.S. Geological Survey	USGS		40.8	-117.483	0.01	3	35	67	ISE	METAMORPHIC	UNKNOWN	UNKNOWN	MARBLE
D326527		USGS		Geochemistry of rock samples from the National Geochemical Database: U.S. Geological Survey, Reston, VA.	U.S. Geological Survey	USGS		40.8	-117.483	0.01	3	35	67	NAA	METAMORPHIC	UNKNOWN	UNKNOWN	MARBLE																						0.0648		1	0.115			0.82
D326539		USGS		Geochemistry of rock samples from the National Geochemical Database: U.S. Geological Survey, Reston, VA.	U.S. Geological Survey	USGS		40.8	-117.483	0.01	3	35	67	AAS	METAMORPHIC	UNKNOWN	UNKNOWN	MARBLE																													1.8
D326539		USGS		Geochemistry of rock samples from the National Geochemical Database: U.S. Geological Survey, Reston, VA.	U.S. Geological Survey	USGS		40.8	-117.483	0.01	3	35	67	ISE	METAMORPHIC	UNKNOWN	UNKNOWN	MARBLE
D326539		USGS		Geochemistry of rock samples from the National Geochemical Database: U.S. Geological Survey, Reston, VA.	U.S. Geological Survey	USGS		40.8	-117.483	0.01	3	35	67	NAA	METAMORPHIC	UNKNOWN	UNKNOWN	MARBLE																						0.135			0.455			4.75
D326546		USGS		Geochemistry of rock samples from the National Geochemical Database: U.S. Geological Survey, Reston, VA.	U.S. Geological Survey	USGS		40.8	-117.483	0.01	3	35	67	AAS	METAMORPHIC	UNKNOWN	UNKNOWN	MARBLE																													0.4
D326546		USGS		Geochemistry of rock samples from the National Geochemical Database: U.S. Geological Survey, Reston, VA.	U.S. Geological Survey	USGS		40.8	-117.483	0.01	3	35	67	ISE	METAMORPHIC	UNKNOWN	UNKNOWN	MARBLE
D326546		USGS		Geochemistry of rock samples from the National Geochemical Database: U.S. Geological Survey, Reston, VA.	U.S. Geological Survey	USGS		40.8	-117.483	0.01	3	35	67	MISC	METAMORPHIC	UNKNOWN	UNKNOWN	MARBLE
D326546		USGS		Geochemistry of rock samples from the National Geochemical Database: U.S. Geological Survey, Reston, VA.	U.S. Geological Survey	USGS		40.8	-117.483	0.01	3	35	67	NAA	METAMORPHIC	UNKNOWN	UNKNOWN	MARBLE																						0.0758			0.0967			19.2
D326547		USGS		Geochemistry of rock samples from the National Geochemical Database: U.S. Geological Survey, Reston, VA.	U.S. Geological Survey	USGS		40.8	-117.483	0.01	3	35	67	AAS	METAMORPHIC	UNKNOWN	UNKNOWN	MARBLE																													2.7
D326547		USGS		Geochemistry of rock samples from the National Geochemical Database: U.S. Geological Survey, Reston, VA.	U.S. Geological Survey	USGS		40.8	-117.483	0.01	3	35	67	ISE	METAMORPHIC	UNKNOWN	UNKNOWN	MARBLE
D326547		USGS		Geochemistry of rock samples from the National Geochemical Database: U.S. Geological Survey, Reston, VA.	U.S. Geological Survey	USGS		40.8	-117.483	0.01	3	35	67	MISC	METAMORPHIC	UNKNOWN	UNKNOWN	MARBLE
D326547		USGS		Geochemistry of rock samples from the National Geochemical Database: U.S. Geological Survey, Reston, VA.	U.S. Geological Survey	USGS		40.8	-117.483	0.01	3	35	67	NAA	METAMORPHIC	UNKNOWN	UNKNOWN	MARBLE																						0.0333			0.735			3.11
D326551		USGS		Geochemistry of rock samples from the National Geochemical Database: U.S. Geological Survey, Reston, VA.	U.S. Geological Survey	USGS		40.8	-117.483	0.01	3	35	67	AAS	METAMORPHIC	UNKNOWN	UNKNOWN	MARBLE																													0.2
D326551		USGS		Geochemistry of rock samples from the National Geochemical Database: U.S. Geological Survey, Reston, VA.	U.S. Geological Survey	USGS		40.8	-117.483	0.01	3	35	67	ISE	METAMORPHIC	UNKNOWN	UNKNOWN	MARBLE
D326551		USGS		Geochemistry of rock samples from the National Geochemical Database: U.S. Geological Survey, Reston, VA.	U.S. Geological Survey	USGS		40.8	-117.483	0.01	3	35	67	NAA	METAMORPHIC	UNKNOWN	UNKNOWN	MARBLE																						0.0584			0.195			3.12
D345285		USGS		Geochemistry of rock samples from the National Geochemical Database: U.S. Geological Survey, Reston, VA.	U.S. Geological Survey	USGS		42.375	-105.25	0.01	66	66	66	MISC	METAMORPHIC	UNKNOWN	UNKNOWN	MARBLE																	2.12
D345285		USGS		Geochemistry of rock samples from the National Geochemical Database: U.S. Geological Survey, Reston, VA.	U.S. Geological Survey	USGS		42.375	-105.25	0.01	66	66	66	NAA	METAMORPHIC	UNKNOWN	UNKNOWN	MARBLE																						7.88			32.8			250
D345285		USGS		Geochemistry of rock samples from the National Geochemical Database: U.S. Geological Survey, Reston, VA.	U.S. Geological Survey	USGS		42.375	-105.25	0.01	66	66	66	TITR	METAMORPHIC	UNKNOWN	UNKNOWN	MARBLE							5.56
D345285		USGS		Geochemistry of rock samples from the National Geochemical Database: U.S. Geological Survey, Reston, VA.	U.S. Geological Survey	USGS		42.375	-105.25	0.01	66	66	66	XRF	METAMORPHIC	UNKNOWN	UNKNOWN	MARBLE		44	0.75	13.1					0.59	2.61	26.4		0.58	0.06	0.11									27		11		212
D357005		USGS		Geochemistry of rock samples from the National Geochemical Database: U.S. Geological Survey, Reston, VA.	U.S. Geological Survey	USGS		64.6083	-165.425	0.01	65	60.5	56	COL	METAMORPHIC	UNKNOWN	UNKNOWN	MARBLE
D357005		USGS		Geochemistry of rock samples from the National Geochemical Database: U.S. Geological Survey, Reston, VA.	U.S. Geological Survey	USGS		64.6083	-165.425	0.01	65	60.5	56	ICPAES	METAMORPHIC	UNKNOWN	UNKNOWN	MARBLE																						0.37	178	2	3	4	0.036	5.7	21	0.05	0.49
D357005		USGS		Geochemistry of rock samples from the National Geochemical Database: U.S. Geological Survey, Reston, VA.	U.S. Geological Survey	USGS		64.6083	-165.425	0.01	65	60.5	56	MISC	METAMORPHIC	UNKNOWN	UNKNOWN	MARBLE																	41.2
D357005		USGS		Geochemistry of rock samples from the National Geochemical Database: U.S. Geological Survey, Reston, VA.	U.S. Geological Survey	USGS		64.6083	-165.425	0.01	65	60.5	56	TITR	METAMORPHIC	UNKNOWN	UNKNOWN	MARBLE							0.17
D357005		USGS		Geochemistry of rock samples from the National Geochemical Database: U.S. Geological Survey, Reston, VA.	U.S. Geological Survey	USGS		64.6083	-165.425	0.01	65	60.5	56	XRF	METAMORPHIC	UNKNOWN	UNKNOWN	MARBLE		4.59		0.85						2.97	50.1			0.18
D357018		USGS		Geochemistry of rock samples from the National Geochemical Database: U.S. Geological Survey, Reston, VA.	U.S. Geological Survey	USGS		64.6083	-165.425	0.01	65	60.5	56	COL	METAMORPHIC	UNKNOWN	UNKNOWN	MARBLE
D357018		USGS		Geochemistry of rock samples from the National Geochemical Database: U.S. Geological Survey, Reston, VA.	U.S. Geological Survey	USGS		64.6083	-165.425	0.01	65	60.5	56	ICPAES	METAMORPHIC	UNKNOWN	UNKNOWN	MARBLE																						2.89	502	29	14	14	0.062	58	7.4		5.68
D357018		USGS		Geochemistry of rock samples from the National Geochemical Database: U.S. Geological Survey, Reston, VA.	U.S. Geological Survey	USGS		64.6083	-165.425	0.01	65	60.5	56	MISC	METAMORPHIC	UNKNOWN	UNKNOWN	MARBLE																	13.4
D357018		USGS		Geochemistry of rock samples from the National Geochemical Database: U.S. Geological Survey, Reston, VA.	U.S. Geological Survey	USGS		64.6083	-165.425	0.01	65	60.5	56	TITR	METAMORPHIC	UNKNOWN	UNKNOWN	MARBLE							3.26
D357018		USGS		Geochemistry of rock samples from the National Geochemical Database: U.S. Geological Survey, Reston, VA.	U.S. Geological Survey	USGS		64.6083	-165.425	0.01	65	60.5	56	XRF	METAMORPHIC	UNKNOWN	UNKNOWN	MARBLE		57.4	0.7	10.4					0.06	3.78	7.69			2.01	0.17
D359539		USGS		Geochemistry of rock samples from the National Geochemical Database: U.S. Geological Survey, Reston, VA.	U.S. Geological Survey	USGS		39.3322	-118.112	0.01				AAS	METAMORPHIC	UNKNOWN	UNKNOWN	MARBLE
D359539		USGS		Geochemistry of rock samples from the National Geochemical Database: U.S. Geological Survey, Reston, VA.	U.S. Geological Survey	USGS		39.3322	-118.112	0.01				ES	METAMORPHIC	UNKNOWN	UNKNOWN	MARBLE																						0.7	150			20
D359539		USGS		Geochemistry of rock samples from the National Geochemical Database: U.S. Geological Survey, Reston, VA.	U.S. Geological Survey	USGS		39.3322	-118.112	0.01				ICPAES	METAMORPHIC	UNKNOWN	UNKNOWN	MARBLE																										16	0.063	4.1
D379630		USGS		Geochemistry of rock samples from the National Geochemical Database: U.S. Geological Survey, Reston, VA.	U.S. Geological Survey	USGS		48.1522	-109.75	0.01				AAS	METAMORPHIC	UNKNOWN	UNKNOWN	MARBLE
D379630		USGS		Geochemistry of rock samples from the National Geochemical Database: U.S. Geological Survey, Reston, VA.	U.S. Geological Survey	USGS		48.1522	-109.75	0.01				ES	METAMORPHIC	UNKNOWN	UNKNOWN	MARBLE																						1	150			15
D379630		USGS		Geochemistry of rock samples from the National Geochemical Database: U.S. Geological Survey, Reston, VA.	U.S. Geological Survey	USGS		48.1522	-109.75	0.01				ICPAES	METAMORPHIC	UNKNOWN	UNKNOWN	MARBLE																										16		16	3.1
D390658		USGS		Geochemistry of rock samples from the National Geochemical Database: U.S. Geological Survey, Reston, VA.	U.S. Geological Survey	USGS		57.385	-134.517	0.01				ICPAES	METAMORPHIC	UNKNOWN	UNKNOWN	MARBLE																						2.4	550	6	7	17	0.27	58			5.3
D391282		USGS		Geochemistry of rock samples from the National Geochemical Database: U.S. Geological Survey, Reston, VA.	U.S. Geological Survey	USGS		57.9278	-135.061	0.01				ICPAES	METAMORPHIC	UNKNOWN	UNKNOWN	MARBLE																						0.09	50	2	2	2.5	0.24	20			0.15
D391293		USGS		Geochemistry of rock samples from the National Geochemical Database: U.S. Geological Survey, Reston, VA.	U.S. Geological Survey	USGS		57.9114	-134.972	0.01				ICPAES	METAMORPHIC	UNKNOWN	UNKNOWN	MARBLE																						0.25	66	8	3	3.2		4.4	1.1		0.05
D391285		USGS		Geochemistry of rock samples from the National Geochemical Database: U.S. Geological Survey, Reston, VA.	U.S. Geological Survey	USGS		57.9217	-135.044	0.01				ICPAES	METAMORPHIC	UNKNOWN	UNKNOWN	MARBLE																						0.12	31	3	2	4.3	0.8	23			0.04
D391286		USGS		Geochemistry of rock samples from the National Geochemical Database: U.S. Geological Survey, Reston, VA.	U.S. Geological Survey	USGS		57.9114	-135.024	0.01				ICPAES	METAMORPHIC	UNKNOWN	UNKNOWN	MARBLE																						0.04	19	4	2	1.1	0.38	20			0.03
D391290		USGS		Geochemistry of rock samples from the National Geochemical Database: U.S. Geological Survey, Reston, VA.	U.S. Geological Survey	USGS		57.915	-135.003	0.01				ICPAES	METAMORPHIC	UNKNOWN	UNKNOWN	MARBLE																						9.2	700	170	61	70		23		0.093	4.1
D391294		USGS		Geochemistry of rock samples from the National Geochemical Database: U.S. Geological Survey, Reston, VA.	U.S. Geological Survey	USGS		57.9114	-134.972	0.01				ICPAES	METAMORPHIC	UNKNOWN	UNKNOWN	MARBLE																						0.11	24	6	2	0.97	0.55	21			0.14
D391295		USGS		Geochemistry of rock samples from the National Geochemical Database: U.S. Geological Survey, Reston, VA.	U.S. Geological Survey	USGS		57.9228	-134.944	0.01				ICPAES	METAMORPHIC	UNKNOWN	UNKNOWN	MARBLE																						0.22	260	4	2	2.5	0.32	15			0.06
D391306		USGS		Geochemistry of rock samples from the National Geochemical Database: U.S. Geological Survey, Reston, VA.	U.S. Geological Survey	USGS		57.9942	-134.074	0.01				ICPAES	METAMORPHIC	UNKNOWN	UNKNOWN	MARBLE																						0.24	260		2	2.4	0.079	4.4			0.02
D516542		USGS		Geochemistry of rock samples from the National Geochemical Database: U.S. Geological Survey, Reston, VA.	U.S. Geological Survey	USGS		57.4767	-133.971	0.01	43	43	43	AAS	METAMORPHIC	UNKNOWN	UNKNOWN	MARBLE
D516542		USGS		Geochemistry of rock samples from the National Geochemical Database: U.S. Geological Survey, Reston, VA.	U.S. Geological Survey	USGS		57.4767	-133.971	0.01	43	43	43	ICPAES	METAMORPHIC	UNKNOWN	UNKNOWN	MARBLE																						3.4	720	1800	120	18	2.5	470	2.2		0.86
D516542		USGS		Geochemistry of rock samples from the National Geochemical Database: U.S. Geological Survey, Reston, VA.	U.S. Geological Survey	USGS		57.4767	-133.971	0.01	43	43	43	MISC	METAMORPHIC	UNKNOWN	UNKNOWN	MARBLE																	21
D516542		USGS		Geochemistry of rock samples from the National Geochemical Database: U.S. Geological Survey, Reston, VA.	U.S. Geological Survey	USGS		57.4767	-133.971	0.01	43	43	43	TITR	METAMORPHIC	UNKNOWN	UNKNOWN	MARBLE							3.58
D516542		USGS		Geochemistry of rock samples from the National Geochemical Database: U.S. Geological Survey, Reston, VA.	U.S. Geological Survey	USGS		57.4767	-133.971	0.01	43	43	43	XRF	METAMORPHIC	UNKNOWN	UNKNOWN	MARBLE		52.9	0.03	1.7					0.1	14.4	3.85			0.27
D516543		USGS		Geochemistry of rock samples from the National Geochemical Database: U.S. Geological Survey, Reston, VA.	U.S. Geological Survey	USGS		57.4767	-133.971	0.01	43	43	43	AAS	METAMORPHIC	UNKNOWN	UNKNOWN	MARBLE
D516543		USGS		Geochemistry of rock samples from the National Geochemical Database: U.S. Geological Survey, Reston, VA.	U.S. Geological Survey	USGS		57.4767	-133.971	0.01	43	43	43	ICPAES	METAMORPHIC	UNKNOWN	UNKNOWN	MARBLE																						1.1	810	37	2	0.25	0.14	14			0.07
[truncated: 1,742 more rows]
[truncated: 84 more columns]

## Sheet: References
References
AUTHOR	YEAR	TITLE	JOURNAL
[truncated: 75 more rows]
