# Supplementary material for: Basic chemical compositions combination rules and quantitative criterion of red beds
Source: Copernicus journal article supplement (doi:10.5194/egusphere-2023-2590), 2024-01-29
Supplement: Supplementary file 15 [file Supplementary Table 9-arkose_EarthChem.xlsx]

## Sheet: Data
EarthChem Download: Wednesday, May. 10, 2023 7:20:25 am
Search Criteria:
Material	sedimentary
Rock Name	arkose
SAMPLE ID	IGSN	SOURCE	DOI	TITLE	JOURNAL	AUTHOR	CRUISEID	LATITUDE	LONGITUDE	LOC PREC	MIN AGE	AGE	MAX AGE	METHOD	MATERIAL	TYPE	COMPOSITION	ROCK NAME	MINERAL	SIO2	TIO2	AL2O3	CR2O3	FE2O3	FE2O3T	FEO	FEOT	MNO	MGO	CAO	NA2O	K2O	P2O5	BAO	LOI	H2O_M	H2O_P	SI	FE	MN	NI	CO	CU	CD	ZN	AS	AG	S	AL
12-0		GEOROC		PRECAMBRIAN VOLCANISM AND SEDIMENTOGENESIS IN THE NORTH-EASTERN PART OF THE BALTIC SHIELD		PREDOVSKIY, A. A.; MELEZHIK, V. A.; BOLOTOV, V. I.; FEDOTOV, ZH. A.; BASALAEV, A. A.; KOZLOV, N. E.; IVANOV, A. A.		64.8	34	0.1				NOT	SEDIMENTARY			ARKOSE		74.16	0.39	12.6		1.16		2.38		0.05	0.21	1.1	3.33	3.54	0.03
5-2		GEOROC		PRECAMBRIAN VOLCANISM AND SEDIMENTOGENESIS IN THE NORTH-EASTERN PART OF THE BALTIC SHIELD		PREDOVSKIY, A. A.; MELEZHIK, V. A.; BOLOTOV, V. I.; FEDOTOV, ZH. A.; BASALAEV, A. A.; KOZLOV, N. E.; IVANOV, A. A.		64.8	34	0.1				NOT	SEDIMENTARY			ARKOSE		80.41	0.35	9.29		0.74		2.52		0.03	0.74	1.29	2.6	1.25	0.1								48							0.03
AC09W		GEOROC	10.1130/0016-7606(1991)103<0817:ISOTAC>2.3.CO;2	ISOTOPIC STUDIES OF THE ACATLAN COMPLEX, SOUTHERN MEXICO: IMPLICATIONS FOR PALEOZOIC NORTH AMERICAN TECTONICS	BULL. GEOL. SOC. AM.	YANEZ, P.; RUIZ, J.; PATCHETT, P. J.; ORTEGA-GUTIERREZ, F.; GEHRELS, G. E.		18	-98	0.1				MS_ID	SEDIMENTARY			ARKOSE
AC58W		GEOROC	10.1130/0016-7606(1991)103<0817:ISOTAC>2.3.CO;2	ISOTOPIC STUDIES OF THE ACATLAN COMPLEX, SOUTHERN MEXICO: IMPLICATIONS FOR PALEOZOIC NORTH AMERICAN TECTONICS	BULL. GEOL. SOC. AM.	YANEZ, P.; RUIZ, J.; PATCHETT, P. J.; ORTEGA-GUTIERREZ, F.; GEHRELS, G. E.		18	-98	0.1				MS_ID	SEDIMENTARY			ARKOSE
15		GEOROC	10.1093/petrology/11.1.15	CHEMICAL VARIATIONS IN THE PALISADE SILL	J. PETROL.	PEARCE, T. H.		40.87	-73.97	0.01				NOT	SEDIMENTARY			ARKOSE		72.62	0.54	13.86		0.31		0.44		0.08	1.24	1.01	5.57	3.58	0.05			0.15	0.32											0.07
08W1012		GEOROC	10.1130/B30852.1	PETROGENESIS OF MOUNT RAINIER ANDESITE: MAGMA FLUX AND GEOLOGIC CONTROLS ON THE CONTRASTING DIFFERENTIATION STYLES AT STRATOVOLCANOES OF THE SOUTHERN WASHINGTON CASCADES	BULL. GEOL. SOC. AM.	SISSON, T. W.; SALTERS, V. J. M.; LARSON, P. B.		46.1047	-122.03	0.0001				XRF	SEDIMENTARY			ARKOSE		84.5	0.17	8.7					0.8	0.02	0.34	1.14	2.46	1.85	0.03								1		1		17
08W1012		GEOROC	10.1130/B30852.1	PETROGENESIS OF MOUNT RAINIER ANDESITE: MAGMA FLUX AND GEOLOGIC CONTROLS ON THE CONTRASTING DIFFERENTIATION STYLES AT STRATOVOLCANOES OF THE SOUTHERN WASHINGTON CASCADES	BULL. GEOL. SOC. AM.	SISSON, T. W.; SALTERS, V. J. M.; LARSON, P. B.		46.1047	-122.03	0.0001				ICPMS	SEDIMENTARY			ARKOSE																								9.3
08W1012		GEOROC	10.1130/B30852.1	PETROGENESIS OF MOUNT RAINIER ANDESITE: MAGMA FLUX AND GEOLOGIC CONTROLS ON THE CONTRASTING DIFFERENTIATION STYLES AT STRATOVOLCANOES OF THE SOUTHERN WASHINGTON CASCADES	BULL. GEOL. SOC. AM.	SISSON, T. W.; SALTERS, V. J. M.; LARSON, P. B.		46.1047	-122.03	0.0001				MS	SEDIMENTARY			ARKOSE
08GL1015		GEOROC	10.1130/B30852.1	PETROGENESIS OF MOUNT RAINIER ANDESITE: MAGMA FLUX AND GEOLOGIC CONTROLS ON THE CONTRASTING DIFFERENTIATION STYLES AT STRATOVOLCANOES OF THE SOUTHERN WASHINGTON CASCADES	BULL. GEOL. SOC. AM.	SISSON, T. W.; SALTERS, V. J. M.; LARSON, P. B.		46.9512	-121.983	0.0001				XRF	SEDIMENTARY			ARKOSE		81.5	0.28	10.8					1.22	0.03	0.5	1.05	2.34	2.22	0.06								10		3		29
08GL1015		GEOROC	10.1130/B30852.1	PETROGENESIS OF MOUNT RAINIER ANDESITE: MAGMA FLUX AND GEOLOGIC CONTROLS ON THE CONTRASTING DIFFERENTIATION STYLES AT STRATOVOLCANOES OF THE SOUTHERN WASHINGTON CASCADES	BULL. GEOL. SOC. AM.	SISSON, T. W.; SALTERS, V. J. M.; LARSON, P. B.		46.9512	-121.983	0.0001				ICPMS	SEDIMENTARY			ARKOSE																								9.3
08GL1015		GEOROC	10.1130/B30852.1	PETROGENESIS OF MOUNT RAINIER ANDESITE: MAGMA FLUX AND GEOLOGIC CONTROLS ON THE CONTRASTING DIFFERENTIATION STYLES AT STRATOVOLCANOES OF THE SOUTHERN WASHINGTON CASCADES	BULL. GEOL. SOC. AM.	SISSON, T. W.; SALTERS, V. J. M.; LARSON, P. B.		46.9512	-121.983	0.0001				MS	SEDIMENTARY			ARKOSE
08RR1001		GEOROC	10.1130/B30852.1	PETROGENESIS OF MOUNT RAINIER ANDESITE: MAGMA FLUX AND GEOLOGIC CONTROLS ON THE CONTRASTING DIFFERENTIATION STYLES AT STRATOVOLCANOES OF THE SOUTHERN WASHINGTON CASCADES	BULL. GEOL. SOC. AM.	SISSON, T. W.; SALTERS, V. J. M.; LARSON, P. B.		46.6463	-121.174	0.0001				XRF	SEDIMENTARY			ARKOSE		71.9	0.54	14.2					4.19	0.06	1.92	1.95	3.57	1.55	0.12								22		18		69
08RR1001		GEOROC	10.1130/B30852.1	PETROGENESIS OF MOUNT RAINIER ANDESITE: MAGMA FLUX AND GEOLOGIC CONTROLS ON THE CONTRASTING DIFFERENTIATION STYLES AT STRATOVOLCANOES OF THE SOUTHERN WASHINGTON CASCADES	BULL. GEOL. SOC. AM.	SISSON, T. W.; SALTERS, V. J. M.; LARSON, P. B.		46.6463	-121.174	0.0001				ICPMS	SEDIMENTARY			ARKOSE																								9.3
08RR1001		GEOROC	10.1130/B30852.1	PETROGENESIS OF MOUNT RAINIER ANDESITE: MAGMA FLUX AND GEOLOGIC CONTROLS ON THE CONTRASTING DIFFERENTIATION STYLES AT STRATOVOLCANOES OF THE SOUTHERN WASHINGTON CASCADES	BULL. GEOL. SOC. AM.	SISSON, T. W.; SALTERS, V. J. M.; LARSON, P. B.		46.6463	-121.174	0.0001				MS	SEDIMENTARY			ARKOSE
08SB1005		GEOROC	10.1130/B30852.1	PETROGENESIS OF MOUNT RAINIER ANDESITE: MAGMA FLUX AND GEOLOGIC CONTROLS ON THE CONTRASTING DIFFERENTIATION STYLES AT STRATOVOLCANOES OF THE SOUTHERN WASHINGTON CASCADES	BULL. GEOL. SOC. AM.	SISSON, T. W.; SALTERS, V. J. M.; LARSON, P. B.		46.629	-121.295	0.0001				XRF	SEDIMENTARY			ARKOSE		69.8	0.74	13.9					6.13	0.08	2.36	1.7	3.38	1.78	0.17								23		28		91
08SB1005		GEOROC	10.1130/B30852.1	PETROGENESIS OF MOUNT RAINIER ANDESITE: MAGMA FLUX AND GEOLOGIC CONTROLS ON THE CONTRASTING DIFFERENTIATION STYLES AT STRATOVOLCANOES OF THE SOUTHERN WASHINGTON CASCADES	BULL. GEOL. SOC. AM.	SISSON, T. W.; SALTERS, V. J. M.; LARSON, P. B.		46.629	-121.295	0.0001				ICPMS	SEDIMENTARY			ARKOSE																								9.3
08SB1005		GEOROC	10.1130/B30852.1	PETROGENESIS OF MOUNT RAINIER ANDESITE: MAGMA FLUX AND GEOLOGIC CONTROLS ON THE CONTRASTING DIFFERENTIATION STYLES AT STRATOVOLCANOES OF THE SOUTHERN WASHINGTON CASCADES	BULL. GEOL. SOC. AM.	SISSON, T. W.; SALTERS, V. J. M.; LARSON, P. B.		46.629	-121.295	0.0001				MS	SEDIMENTARY			ARKOSE
S5		GEOROC	10.1007/s00531-021-02125-6	DETRITAL ZIRCON AGE CONSTRAINTS FOR LATE PERMIAN TO LATE TRIASSIC CLASTIC SEDIMENTATION IN THE NORTHERN-WESTERN SAKAR-STRANDZHA ZONE, SE BULGARIA	INT. J. EARTH SCI. (GEOL. RUNDSCHAU)	BONEV, N.; FILIPOV, P.; RAICHEVA, R.; MORITZ, R.		42.0927	26.2747	1e-14				XRF	SEDIMENTARY			ARKOSE		75.3	0.39	11.94	0		3.47			0.01	0.69	0.15	0.38	5.03	0.13
S5		GEOROC	10.1007/s00531-021-02125-6	DETRITAL ZIRCON AGE CONSTRAINTS FOR LATE PERMIAN TO LATE TRIASSIC CLASTIC SEDIMENTATION IN THE NORTHERN-WESTERN SAKAR-STRANDZHA ZONE, SE BULGARIA	INT. J. EARTH SCI. (GEOL. RUNDSCHAU)	BONEV, N.; FILIPOV, P.; RAICHEVA, R.; MORITZ, R.		42.0927	26.2747	1e-14				IGN	SEDIMENTARY			ARKOSE																	1.73
S5		GEOROC	10.1007/s00531-021-02125-6	DETRITAL ZIRCON AGE CONSTRAINTS FOR LATE PERMIAN TO LATE TRIASSIC CLASTIC SEDIMENTATION IN THE NORTHERN-WESTERN SAKAR-STRANDZHA ZONE, SE BULGARIA	INT. J. EARTH SCI. (GEOL. RUNDSCHAU)	BONEV, N.; FILIPOV, P.; RAICHEVA, R.; MORITZ, R.		42.0927	26.2747	1e-14				ICPMS_LA	SEDIMENTARY			ARKOSE																							6	4.96	3.46		49
S8		GEOROC	10.1007/s00531-021-02125-6	DETRITAL ZIRCON AGE CONSTRAINTS FOR LATE PERMIAN TO LATE TRIASSIC CLASTIC SEDIMENTATION IN THE NORTHERN-WESTERN SAKAR-STRANDZHA ZONE, SE BULGARIA	INT. J. EARTH SCI. (GEOL. RUNDSCHAU)	BONEV, N.; FILIPOV, P.; RAICHEVA, R.; MORITZ, R.		42.0916	26.2741	1e-15				XRF	SEDIMENTARY			ARKOSE		74.55	0.53	11.24	0		3.97			0.02	1.12	0.34	0.27	4.7	0.25
S8		GEOROC	10.1007/s00531-021-02125-6	DETRITAL ZIRCON AGE CONSTRAINTS FOR LATE PERMIAN TO LATE TRIASSIC CLASTIC SEDIMENTATION IN THE NORTHERN-WESTERN SAKAR-STRANDZHA ZONE, SE BULGARIA	INT. J. EARTH SCI. (GEOL. RUNDSCHAU)	BONEV, N.; FILIPOV, P.; RAICHEVA, R.; MORITZ, R.		42.0916	26.2741	1e-15				IGN	SEDIMENTARY			ARKOSE																	2.12
S8		GEOROC	10.1007/s00531-021-02125-6	DETRITAL ZIRCON AGE CONSTRAINTS FOR LATE PERMIAN TO LATE TRIASSIC CLASTIC SEDIMENTATION IN THE NORTHERN-WESTERN SAKAR-STRANDZHA ZONE, SE BULGARIA	INT. J. EARTH SCI. (GEOL. RUNDSCHAU)	BONEV, N.; FILIPOV, P.; RAICHEVA, R.; MORITZ, R.		42.0916	26.2741	1e-15				ICPMS_LA	SEDIMENTARY			ARKOSE																							8	7.01	8.51		73
S19		GEOROC	10.1007/s00531-021-02125-6	DETRITAL ZIRCON AGE CONSTRAINTS FOR LATE PERMIAN TO LATE TRIASSIC CLASTIC SEDIMENTATION IN THE NORTHERN-WESTERN SAKAR-STRANDZHA ZONE, SE BULGARIA	INT. J. EARTH SCI. (GEOL. RUNDSCHAU)	BONEV, N.; FILIPOV, P.; RAICHEVA, R.; MORITZ, R.		42.0217	26.5727	1e-15				XRF	SEDIMENTARY			ARKOSE		78.03	0.14	12.06	0		1.42			0.01	0.46	0	0.11	5.62	0.02
S19		GEOROC	10.1007/s00531-021-02125-6	DETRITAL ZIRCON AGE CONSTRAINTS FOR LATE PERMIAN TO LATE TRIASSIC CLASTIC SEDIMENTATION IN THE NORTHERN-WESTERN SAKAR-STRANDZHA ZONE, SE BULGARIA	INT. J. EARTH SCI. (GEOL. RUNDSCHAU)	BONEV, N.; FILIPOV, P.; RAICHEVA, R.; MORITZ, R.		42.0217	26.5727	1e-15				IGN	SEDIMENTARY			ARKOSE																	1.59
S19		GEOROC	10.1007/s00531-021-02125-6	DETRITAL ZIRCON AGE CONSTRAINTS FOR LATE PERMIAN TO LATE TRIASSIC CLASTIC SEDIMENTATION IN THE NORTHERN-WESTERN SAKAR-STRANDZHA ZONE, SE BULGARIA	INT. J. EARTH SCI. (GEOL. RUNDSCHAU)	BONEV, N.; FILIPOV, P.; RAICHEVA, R.; MORITZ, R.		42.0217	26.5727	1e-15				ICPMS_LA	SEDIMENTARY			ARKOSE																							6	2.89	3.97		58
S12		GEOROC	10.1007/s00531-021-02125-6	DETRITAL ZIRCON AGE CONSTRAINTS FOR LATE PERMIAN TO LATE TRIASSIC CLASTIC SEDIMENTATION IN THE NORTHERN-WESTERN SAKAR-STRANDZHA ZONE, SE BULGARIA	INT. J. EARTH SCI. (GEOL. RUNDSCHAU)	BONEV, N.; FILIPOV, P.; RAICHEVA, R.; MORITZ, R.		42.0694	26.3253	1e-15				XRF	SEDIMENTARY			ARKOSE		47.81	0.03	3.63	0		0.32			0.02	0.74	25.2	0.82	0.55	0.02
S12		GEOROC	10.1007/s00531-021-02125-6	DETRITAL ZIRCON AGE CONSTRAINTS FOR LATE PERMIAN TO LATE TRIASSIC CLASTIC SEDIMENTATION IN THE NORTHERN-WESTERN SAKAR-STRANDZHA ZONE, SE BULGARIA	INT. J. EARTH SCI. (GEOL. RUNDSCHAU)	BONEV, N.; FILIPOV, P.; RAICHEVA, R.; MORITZ, R.		42.0694	26.3253	1e-15				IGN	SEDIMENTARY			ARKOSE																	20.89
S12		GEOROC	10.1007/s00531-021-02125-6	DETRITAL ZIRCON AGE CONSTRAINTS FOR LATE PERMIAN TO LATE TRIASSIC CLASTIC SEDIMENTATION IN THE NORTHERN-WESTERN SAKAR-STRANDZHA ZONE, SE BULGARIA	INT. J. EARTH SCI. (GEOL. RUNDSCHAU)	BONEV, N.; FILIPOV, P.; RAICHEVA, R.; MORITZ, R.		42.0694	26.3253	1e-15				ICPMS_LA	SEDIMENTARY			ARKOSE																							0	0.48	5.08		41
S55		GEOROC	10.1007/s00531-021-02125-6	DETRITAL ZIRCON AGE CONSTRAINTS FOR LATE PERMIAN TO LATE TRIASSIC CLASTIC SEDIMENTATION IN THE NORTHERN-WESTERN SAKAR-STRANDZHA ZONE, SE BULGARIA	INT. J. EARTH SCI. (GEOL. RUNDSCHAU)	BONEV, N.; FILIPOV, P.; RAICHEVA, R.; MORITZ, R.		42.0056	25.5092	1e-15				XRF	SEDIMENTARY			ARKOSE		86.52	0.27	6.97	0		1.76			0.02	0.56	0.18	0.89	2.2	0.13
S55		GEOROC	10.1007/s00531-021-02125-6	DETRITAL ZIRCON AGE CONSTRAINTS FOR LATE PERMIAN TO LATE TRIASSIC CLASTIC SEDIMENTATION IN THE NORTHERN-WESTERN SAKAR-STRANDZHA ZONE, SE BULGARIA	INT. J. EARTH SCI. (GEOL. RUNDSCHAU)	BONEV, N.; FILIPOV, P.; RAICHEVA, R.; MORITZ, R.		42.0056	25.5092	1e-15				IGN	SEDIMENTARY			ARKOSE																	1.01
S55		GEOROC	10.1007/s00531-021-02125-6	DETRITAL ZIRCON AGE CONSTRAINTS FOR LATE PERMIAN TO LATE TRIASSIC CLASTIC SEDIMENTATION IN THE NORTHERN-WESTERN SAKAR-STRANDZHA ZONE, SE BULGARIA	INT. J. EARTH SCI. (GEOL. RUNDSCHAU)	BONEV, N.; FILIPOV, P.; RAICHEVA, R.; MORITZ, R.		42.0056	25.5092	1e-15				ICPMS_LA	SEDIMENTARY			ARKOSE																							0	3.34	8.43		25
S71		GEOROC	10.1007/s00531-021-02125-6	DETRITAL ZIRCON AGE CONSTRAINTS FOR LATE PERMIAN TO LATE TRIASSIC CLASTIC SEDIMENTATION IN THE NORTHERN-WESTERN SAKAR-STRANDZHA ZONE, SE BULGARIA	INT. J. EARTH SCI. (GEOL. RUNDSCHAU)	BONEV, N.; FILIPOV, P.; RAICHEVA, R.; MORITZ, R.		42.0072	25.7751	1e-15				XRF	SEDIMENTARY			ARKOSE		60.08	0.07	6.81	0		0.87			0.2	0.28	14.24	0.15	5.2	0.04
S71		GEOROC	10.1007/s00531-021-02125-6	DETRITAL ZIRCON AGE CONSTRAINTS FOR LATE PERMIAN TO LATE TRIASSIC CLASTIC SEDIMENTATION IN THE NORTHERN-WESTERN SAKAR-STRANDZHA ZONE, SE BULGARIA	INT. J. EARTH SCI. (GEOL. RUNDSCHAU)	BONEV, N.; FILIPOV, P.; RAICHEVA, R.; MORITZ, R.		42.0072	25.7751	1e-15				IGN	SEDIMENTARY			ARKOSE																	11.9
S71		GEOROC	10.1007/s00531-021-02125-6	DETRITAL ZIRCON AGE CONSTRAINTS FOR LATE PERMIAN TO LATE TRIASSIC CLASTIC SEDIMENTATION IN THE NORTHERN-WESTERN SAKAR-STRANDZHA ZONE, SE BULGARIA	INT. J. EARTH SCI. (GEOL. RUNDSCHAU)	BONEV, N.; FILIPOV, P.; RAICHEVA, R.; MORITZ, R.		42.0072	25.7751	1e-15				ICPMS_LA	SEDIMENTARY			ARKOSE																							0	1.18	11.08		21
S73		GEOROC	10.1007/s00531-021-02125-6	DETRITAL ZIRCON AGE CONSTRAINTS FOR LATE PERMIAN TO LATE TRIASSIC CLASTIC SEDIMENTATION IN THE NORTHERN-WESTERN SAKAR-STRANDZHA ZONE, SE BULGARIA	INT. J. EARTH SCI. (GEOL. RUNDSCHAU)	BONEV, N.; FILIPOV, P.; RAICHEVA, R.; MORITZ, R.		42.0192	25.6515	1e-15				XRF	SEDIMENTARY			ARKOSE		77.61	0.56	11.21	0.01		3.48			0.02	0.76	0.01	0.12	4.18	0.06
S73		GEOROC	10.1007/s00531-021-02125-6	DETRITAL ZIRCON AGE CONSTRAINTS FOR LATE PERMIAN TO LATE TRIASSIC CLASTIC SEDIMENTATION IN THE NORTHERN-WESTERN SAKAR-STRANDZHA ZONE, SE BULGARIA	INT. J. EARTH SCI. (GEOL. RUNDSCHAU)	BONEV, N.; FILIPOV, P.; RAICHEVA, R.; MORITZ, R.		42.0192	25.6515	1e-15				IGN	SEDIMENTARY			ARKOSE																	1.9
S73		GEOROC	10.1007/s00531-021-02125-6	DETRITAL ZIRCON AGE CONSTRAINTS FOR LATE PERMIAN TO LATE TRIASSIC CLASTIC SEDIMENTATION IN THE NORTHERN-WESTERN SAKAR-STRANDZHA ZONE, SE BULGARIA	INT. J. EARTH SCI. (GEOL. RUNDSCHAU)	BONEV, N.; FILIPOV, P.; RAICHEVA, R.; MORITZ, R.		42.0192	25.6515	1e-15				ICPMS_LA	SEDIMENTARY			ARKOSE																							24	3.53	5.45		25
S90		GEOROC	10.1007/s00531-021-02125-6	DETRITAL ZIRCON AGE CONSTRAINTS FOR LATE PERMIAN TO LATE TRIASSIC CLASTIC SEDIMENTATION IN THE NORTHERN-WESTERN SAKAR-STRANDZHA ZONE, SE BULGARIA	INT. J. EARTH SCI. (GEOL. RUNDSCHAU)	BONEV, N.; FILIPOV, P.; RAICHEVA, R.; MORITZ, R.		42.4171	26.1526	1e-05				XRF	SEDIMENTARY			ARKOSE		83.43	0.23	9.34	0		1.4			0.01	0.27	0.06	0.44	2.2	0.06
S90		GEOROC	10.1007/s00531-021-02125-6	DETRITAL ZIRCON AGE CONSTRAINTS FOR LATE PERMIAN TO LATE TRIASSIC CLASTIC SEDIMENTATION IN THE NORTHERN-WESTERN SAKAR-STRANDZHA ZONE, SE BULGARIA	INT. J. EARTH SCI. (GEOL. RUNDSCHAU)	BONEV, N.; FILIPOV, P.; RAICHEVA, R.; MORITZ, R.		42.4171	26.1526	1e-05				IGN	SEDIMENTARY			ARKOSE																	1.49
S90		GEOROC	10.1007/s00531-021-02125-6	DETRITAL ZIRCON AGE CONSTRAINTS FOR LATE PERMIAN TO LATE TRIASSIC CLASTIC SEDIMENTATION IN THE NORTHERN-WESTERN SAKAR-STRANDZHA ZONE, SE BULGARIA	INT. J. EARTH SCI. (GEOL. RUNDSCHAU)	BONEV, N.; FILIPOV, P.; RAICHEVA, R.; MORITZ, R.		42.4171	26.1526	1e-05				ICPMS_LA	SEDIMENTARY			ARKOSE																							0	2.51	6.15		16
BFZ419		USGS		Geochemistry of rock samples from the National Geochemical Database: U.S. Geological Survey, Reston, VA.	U.S. Geological Survey	USGS		44.2269	-114.616	0.01				AAS	SEDIMENTARY	UNKNOWN	UNKNOWN	ARKOSE																									20		20
BFZ419		USGS		Geochemistry of rock samples from the National Geochemical Database: U.S. Geological Survey, Reston, VA.	U.S. Geological Survey	USGS		44.2269	-114.616	0.01				COL	SEDIMENTARY	UNKNOWN	UNKNOWN	ARKOSE
BFZ419		USGS		Geochemistry of rock samples from the National Geochemical Database: U.S. Geological Survey, Reston, VA.	U.S. Geological Survey	USGS		44.2269	-114.616	0.01				ES	SEDIMENTARY	UNKNOWN	UNKNOWN	ARKOSE																					2	1000	30	5	70				0.5
CBX582		USGS		Geochemistry of rock samples from the National Geochemical Database: U.S. Geological Survey, Reston, VA.	U.S. Geological Survey	USGS		68.2006	-156.267	0.01	55	55	55	ES	SEDIMENTARY	UNKNOWN	UNKNOWN	ARKOSE																					2	200
CBX583		USGS		Geochemistry of rock samples from the National Geochemical Database: U.S. Geological Survey, Reston, VA.	U.S. Geological Survey	USGS		68.2006	-156.267	0.01	55	55	55	ES	SEDIMENTARY	UNKNOWN	UNKNOWN	ARKOSE																					2	500	15
CCS613		USGS		Geochemistry of rock samples from the National Geochemical Database: U.S. Geological Survey, Reston, VA.	U.S. Geological Survey	USGS		63.7014	-155.656	0.01	65	65	65	AAS	SEDIMENTARY	UNKNOWN	UNKNOWN	ARKOSE																									30		65
CCS613		USGS		Geochemistry of rock samples from the National Geochemical Database: U.S. Geological Survey, Reston, VA.	U.S. Geological Survey	USGS		63.7014	-155.656	0.01	65	65	65	COL	SEDIMENTARY	UNKNOWN	UNKNOWN	ARKOSE																												20
CCS613		USGS		Geochemistry of rock samples from the National Geochemical Database: U.S. Geological Survey, Reston, VA.	U.S. Geological Survey	USGS		63.7014	-155.656	0.01	65	65	65	ES	SEDIMENTARY	UNKNOWN	UNKNOWN	ARKOSE																					5	500	100		50
CHA307		USGS		Geochemistry of rock samples from the National Geochemical Database: U.S. Geological Survey, Reston, VA.	U.S. Geological Survey	USGS		61.7361	-149.276	0.01				AAS	SEDIMENTARY	UNKNOWN	UNKNOWN	ARKOSE																											45
CHA307		USGS		Geochemistry of rock samples from the National Geochemical Database: U.S. Geological Survey, Reston, VA.	U.S. Geological Survey	USGS		61.7361	-149.276	0.01				ES	SEDIMENTARY	UNKNOWN	UNKNOWN	ARKOSE																					5	500	15	15	50
D120121		USGS		Geochemistry of rock samples from the National Geochemical Database: U.S. Geological Survey, Reston, VA.	U.S. Geological Survey	USGS		48.7	-120.617	0.01	65	65	65	UNKNOWN	SEDIMENTARY	UNKNOWN	UNKNOWN	ARKOSE																					1.5	500		7	5						7
D120552		USGS		Geochemistry of rock samples from the National Geochemical Database: U.S. Geological Survey, Reston, VA.	U.S. Geological Survey	USGS		48.8	-120.75	0.01	65	65	65	UNKNOWN	SEDIMENTARY	UNKNOWN	UNKNOWN	ARKOSE																					5	700		7	100						5
D120553		USGS		Geochemistry of rock samples from the National Geochemical Database: U.S. Geological Survey, Reston, VA.	U.S. Geological Survey	USGS		48.8	-120.75	0.01	65	65	65	UNKNOWN	SEDIMENTARY	UNKNOWN	UNKNOWN	ARKOSE																					7	70	70	30	500				1.5		2
D120556		USGS		Geochemistry of rock samples from the National Geochemical Database: U.S. Geological Survey, Reston, VA.	U.S. Geological Survey	USGS		48.8667	-120.917	0.01	65	65	65	UNKNOWN	SEDIMENTARY	UNKNOWN	UNKNOWN	ARKOSE																					5	1000		10	15						7
D120562		USGS		Geochemistry of rock samples from the National Geochemical Database: U.S. Geological Survey, Reston, VA.	U.S. Geological Survey	USGS		48.8333	-120.917	0.01	65	65	65	UNKNOWN	SEDIMENTARY	UNKNOWN	UNKNOWN	ARKOSE																						1000		5	100						3
D120565		USGS		Geochemistry of rock samples from the National Geochemical Database: U.S. Geological Survey, Reston, VA.	U.S. Geological Survey	USGS		48.8167	-120.9	0.01	65	65	65	UNKNOWN	SEDIMENTARY	UNKNOWN	UNKNOWN	ARKOSE																					0.5	500		7	30						10
D120969		USGS		Geochemistry of rock samples from the National Geochemical Database: U.S. Geological Survey, Reston, VA.	U.S. Geological Survey	USGS		48.7833	-120.8	0.01	65	65	65	UNKNOWN	SEDIMENTARY	UNKNOWN	UNKNOWN	ARKOSE																					5	700	50	7	50						5
D120970		USGS		Geochemistry of rock samples from the National Geochemical Database: U.S. Geological Survey, Reston, VA.	U.S. Geological Survey	USGS		48.7833	-120.8	0.01	65	65	65	UNKNOWN	SEDIMENTARY	UNKNOWN	UNKNOWN	ARKOSE																					5	500	150	15	150						5
D120971		USGS		Geochemistry of rock samples from the National Geochemical Database: U.S. Geological Survey, Reston, VA.	U.S. Geological Survey	USGS		48.7833	-120.8	0.01	65	65	65	UNKNOWN	SEDIMENTARY	UNKNOWN	UNKNOWN	ARKOSE																					3	500			50						5
D120975		USGS		Geochemistry of rock samples from the National Geochemical Database: U.S. Geological Survey, Reston, VA.	U.S. Geological Survey	USGS		48.8833	-120.717	0.01	65	65	65	UNKNOWN	SEDIMENTARY	UNKNOWN	UNKNOWN	ARKOSE																					3	300		5	50						10
D125535		USGS		Geochemistry of rock samples from the National Geochemical Database: U.S. Geological Survey, Reston, VA.	U.S. Geological Survey	USGS		38.5	-104.867	0.01	70	70	70	DNAA	SEDIMENTARY	UNKNOWN	UNKNOWN	ARKOSE
D125535		USGS		Geochemistry of rock samples from the National Geochemical Database: U.S. Geological Survey, Reston, VA.	U.S. Geological Survey	USGS		38.5	-104.867	0.01	70	70	70	ICPAES	SEDIMENTARY	UNKNOWN	UNKNOWN	ARKOSE																									1	0.11	4.1
D125535		USGS		Geochemistry of rock samples from the National Geochemical Database: U.S. Geological Survey, Reston, VA.	U.S. Geological Survey	USGS		38.5	-104.867	0.01	70	70	70	UNKNOWN	SEDIMENTARY	UNKNOWN	UNKNOWN	ARKOSE		64.1		7.16							3.18	9.9	0.24	3.92							0.55	1200			2
D125536		USGS		Geochemistry of rock samples from the National Geochemical Database: U.S. Geological Survey, Reston, VA.	U.S. Geological Survey	USGS		40.3667	-105.133	0.01	70	70	70	DNAA	SEDIMENTARY	UNKNOWN	UNKNOWN	ARKOSE
D125536		USGS		Geochemistry of rock samples from the National Geochemical Database: U.S. Geological Survey, Reston, VA.	U.S. Geological Survey	USGS		40.3667	-105.133	0.01	70	70	70	ICPAES	SEDIMENTARY	UNKNOWN	UNKNOWN	ARKOSE																									0.79	0.27	4.5
D125536		USGS		Geochemistry of rock samples from the National Geochemical Database: U.S. Geological Survey, Reston, VA.	U.S. Geological Survey	USGS		40.3667	-105.133	0.01	70	70	70	UNKNOWN	SEDIMENTARY	UNKNOWN	UNKNOWN	ARKOSE		64.9		5.49							0.44	15.5	0.55	2.53							0.34	710			6
D125537		USGS		Geochemistry of rock samples from the National Geochemical Database: U.S. Geological Survey, Reston, VA.	U.S. Geological Survey	USGS		38.5	-104.867	0.01	70	70	70	DNAA	SEDIMENTARY	UNKNOWN	UNKNOWN	ARKOSE
D125537		USGS		Geochemistry of rock samples from the National Geochemical Database: U.S. Geological Survey, Reston, VA.	U.S. Geological Survey	USGS		38.5	-104.867	0.01	70	70	70	ICPAES	SEDIMENTARY	UNKNOWN	UNKNOWN	ARKOSE																									1.1		7.3
D125537		USGS		Geochemistry of rock samples from the National Geochemical Database: U.S. Geological Survey, Reston, VA.	U.S. Geological Survey	USGS		38.5	-104.867	0.01	70	70	70	UNKNOWN	SEDIMENTARY	UNKNOWN	UNKNOWN	ARKOSE		81.2		9.8							0.28	0.12	0.13	3.16							1.9	150			8
D125538		USGS		Geochemistry of rock samples from the National Geochemical Database: U.S. Geological Survey, Reston, VA.	U.S. Geological Survey	USGS		40.6333	-105.133	0.01	70	70	70	DNAA	SEDIMENTARY	UNKNOWN	UNKNOWN	ARKOSE
D125538		USGS		Geochemistry of rock samples from the National Geochemical Database: U.S. Geological Survey, Reston, VA.	U.S. Geological Survey	USGS		40.6333	-105.133	0.01	70	70	70	ICPAES	SEDIMENTARY	UNKNOWN	UNKNOWN	ARKOSE																									5.7		2.5
D125538		USGS		Geochemistry of rock samples from the National Geochemical Database: U.S. Geological Survey, Reston, VA.	U.S. Geological Survey	USGS		40.6333	-105.133	0.01	70	70	70	UNKNOWN	SEDIMENTARY	UNKNOWN	UNKNOWN	ARKOSE		82.8		10.2							0.34	1.73	1.63	3.5							0.19	500			26
D125539		USGS		Geochemistry of rock samples from the National Geochemical Database: U.S. Geological Survey, Reston, VA.	U.S. Geological Survey	USGS		40.6333	-105.133	0.01	70	70	70	DNAA	SEDIMENTARY	UNKNOWN	UNKNOWN	ARKOSE
D125539		USGS		Geochemistry of rock samples from the National Geochemical Database: U.S. Geological Survey, Reston, VA.	U.S. Geological Survey	USGS		40.6333	-105.133	0.01	70	70	70	ICPAES	SEDIMENTARY	UNKNOWN	UNKNOWN	ARKOSE																									0.41	0.56	2.3
D125539		USGS		Geochemistry of rock samples from the National Geochemical Database: U.S. Geological Survey, Reston, VA.	U.S. Geological Survey	USGS		40.6333	-105.133	0.01	70	70	70	UNKNOWN	SEDIMENTARY	UNKNOWN	UNKNOWN	ARKOSE		49		5.17							0.5	23	0.9	1.85							0.56	500			4
D125540		USGS		Geochemistry of rock samples from the National Geochemical Database: U.S. Geological Survey, Reston, VA.	U.S. Geological Survey	USGS		40.5	-105.133	0.01	70	70	70	DNAA	SEDIMENTARY	UNKNOWN	UNKNOWN	ARKOSE
D125540		USGS		Geochemistry of rock samples from the National Geochemical Database: U.S. Geological Survey, Reston, VA.	U.S. Geological Survey	USGS		40.5	-105.133	0.01	70	70	70	ICPAES	SEDIMENTARY	UNKNOWN	UNKNOWN	ARKOSE																									0.62	0.05	2.4
D125540		USGS		Geochemistry of rock samples from the National Geochemical Database: U.S. Geological Survey, Reston, VA.	U.S. Geological Survey	USGS		40.5	-105.133	0.01	70	70	70	UNKNOWN	SEDIMENTARY	UNKNOWN	UNKNOWN	ARKOSE		83.6		7.58							0.6	2.7	1.72	1.13							0.46	500			8
D125541		USGS		Geochemistry of rock samples from the National Geochemical Database: U.S. Geological Survey, Reston, VA.	U.S. Geological Survey	USGS		39.3667	-105	0.01	70	70	70	DNAA	SEDIMENTARY	UNKNOWN	UNKNOWN	ARKOSE
D125541		USGS		Geochemistry of rock samples from the National Geochemical Database: U.S. Geological Survey, Reston, VA.	U.S. Geological Survey	USGS		39.3667	-105	0.01	70	70	70	ICPAES	SEDIMENTARY	UNKNOWN	UNKNOWN	ARKOSE																									1.2		8.5
D125541		USGS		Geochemistry of rock samples from the National Geochemical Database: U.S. Geological Survey, Reston, VA.	U.S. Geological Survey	USGS		39.3667	-105	0.01	70	70	70	UNKNOWN	SEDIMENTARY	UNKNOWN	UNKNOWN	ARKOSE		83.5		11.3							0.23	0.13	0.24	6.25							0.99	110			11
D125542		USGS		Geochemistry of rock samples from the National Geochemical Database: U.S. Geological Survey, Reston, VA.	U.S. Geological Survey	USGS		40.3667	-105.133	0.01	70	70	70	DNAA	SEDIMENTARY	UNKNOWN	UNKNOWN	ARKOSE
D125542		USGS		Geochemistry of rock samples from the National Geochemical Database: U.S. Geological Survey, Reston, VA.	U.S. Geological Survey	USGS		40.3667	-105.133	0.01	70	70	70	ICPAES	SEDIMENTARY	UNKNOWN	UNKNOWN	ARKOSE																									1.1		5.5
D125542		USGS		Geochemistry of rock samples from the National Geochemical Database: U.S. Geological Survey, Reston, VA.	U.S. Geological Survey	USGS		40.3667	-105.133	0.01	70	70	70	UNKNOWN	SEDIMENTARY	UNKNOWN	UNKNOWN	ARKOSE		83.6		8.69							0.7	0.7	0.54	1.79							0.6	120	8		15
D125543		USGS		Geochemistry of rock samples from the National Geochemical Database: U.S. Geological Survey, Reston, VA.	U.S. Geological Survey	USGS		40.5	-105.25	0.01	70	70	70	DNAA	SEDIMENTARY	UNKNOWN	UNKNOWN	ARKOSE
D125543		USGS		Geochemistry of rock samples from the National Geochemical Database: U.S. Geological Survey, Reston, VA.	U.S. Geological Survey	USGS		40.5	-105.25	0.01	70	70	70	ICPAES	SEDIMENTARY	UNKNOWN	UNKNOWN	ARKOSE																									0.79		3
D125543		USGS		Geochemistry of rock samples from the National Geochemical Database: U.S. Geological Survey, Reston, VA.	U.S. Geological Survey	USGS		40.5	-105.25	0.01	70	70	70	UNKNOWN	SEDIMENTARY	UNKNOWN	UNKNOWN	ARKOSE		86.4		7.64							0.4	0.12	2.2	0.74							0.22	36	2		8
D125544		USGS		Geochemistry of rock samples from the National Geochemical Database: U.S. Geological Survey, Reston, VA.	U.S. Geological Survey	USGS		39.3667	-105	0.01	70	70	70	DNAA	SEDIMENTARY	UNKNOWN	UNKNOWN	ARKOSE
D125544		USGS		Geochemistry of rock samples from the National Geochemical Database: U.S. Geological Survey, Reston, VA.	U.S. Geological Survey	USGS		39.3667	-105	0.01	70	70	70	ICPAES	SEDIMENTARY	UNKNOWN	UNKNOWN	ARKOSE																									6.2	0.42	35
D125544		USGS		Geochemistry of rock samples from the National Geochemical Database: U.S. Geological Survey, Reston, VA.	U.S. Geological Survey	USGS		39.3667	-105	0.01	70	70	70	UNKNOWN	SEDIMENTARY	UNKNOWN	UNKNOWN	ARKOSE		76.5		9.61							0.16	0.04	0.18	4.73							3.6	90	2		12
D125545		USGS		Geochemistry of rock samples from the National Geochemical Database: U.S. Geological Survey, Reston, VA.	U.S. Geological Survey	USGS		40.5	-105.133	0.01	70	70	70	DNAA	SEDIMENTARY	UNKNOWN	UNKNOWN	ARKOSE
D125545		USGS		Geochemistry of rock samples from the National Geochemical Database: U.S. Geological Survey, Reston, VA.	U.S. Geological Survey	USGS		40.5	-105.133	0.01	70	70	70	ICPAES	SEDIMENTARY	UNKNOWN	UNKNOWN	ARKOSE																									1.1		9.6
D125545		USGS		Geochemistry of rock samples from the National Geochemical Database: U.S. Geological Survey, Reston, VA.	U.S. Geological Survey	USGS		40.5	-105.133	0.01	70	70	70	UNKNOWN	SEDIMENTARY	UNKNOWN	UNKNOWN	ARKOSE		83		10							1.26	0.59	0.53	2.75							1.6	150	13		11
D125546		USGS		Geochemistry of rock samples from the National Geochemical Database: U.S. Geological Survey, Reston, VA.	U.S. Geological Survey	USGS		40.3667	-105.133	0.01	70	70	70	DNAA	SEDIMENTARY	UNKNOWN	UNKNOWN	ARKOSE
D125546		USGS		Geochemistry of rock samples from the National Geochemical Database: U.S. Geological Survey, Reston, VA.	U.S. Geological Survey	USGS		40.3667	-105.133	0.01	70	70	70	ICPAES	SEDIMENTARY	UNKNOWN	UNKNOWN	ARKOSE																									0.74		3.2
D125546		USGS		Geochemistry of rock samples from the National Geochemical Database: U.S. Geological Survey, Reston, VA.	U.S. Geological Survey	USGS		40.3667	-105.133	0.01	70	70	70	UNKNOWN	SEDIMENTARY	UNKNOWN	UNKNOWN	ARKOSE		87.1		6.56							0.29	0.12	0.81	2.04							0.28	47			17
D125547		USGS		Geochemistry of rock samples from the National Geochemical Database: U.S. Geological Survey, Reston, VA.	U.S. Geological Survey	USGS		39.5	-105.133	0.01	70	70	70	DNAA	SEDIMENTARY	UNKNOWN	UNKNOWN	ARKOSE
D125547		USGS		Geochemistry of rock samples from the National Geochemical Database: U.S. Geological Survey, Reston, VA.	U.S. Geological Survey	USGS		39.5	-105.133	0.01	70	70	70	ICPAES	SEDIMENTARY	UNKNOWN	UNKNOWN	ARKOSE																									3.1	0.094	8.6
D125547		USGS		Geochemistry of rock samples from the National Geochemical Database: U.S. Geological Survey, Reston, VA.	U.S. Geological Survey	USGS		39.5	-105.133	0.01	70	70	70	UNKNOWN	SEDIMENTARY	UNKNOWN	UNKNOWN	ARKOSE		72.7		7.49							0.88	6.2	0.17	4.05							0.19	500			7
D125548		USGS		Geochemistry of rock samples from the National Geochemical Database: U.S. Geological Survey, Reston, VA.	U.S. Geological Survey	USGS		40.5	-105.133	0.01	70	70	70	DNAA	SEDIMENTARY	UNKNOWN	UNKNOWN	ARKOSE
D125548		USGS		Geochemistry of rock samples from the National Geochemical Database: U.S. Geological Survey, Reston, VA.	U.S. Geological Survey	USGS		40.5	-105.133	0.01	70	70	70	ICPAES	SEDIMENTARY	UNKNOWN	UNKNOWN	ARKOSE																									1.1		5.3
D125548		USGS		Geochemistry of rock samples from the National Geochemical Database: U.S. Geological Survey, Reston, VA.	U.S. Geological Survey	USGS		40.5	-105.133	0.01	70	70	70	UNKNOWN	SEDIMENTARY	UNKNOWN	UNKNOWN	ARKOSE		81.2		8.66							0.7	1.5	0.73	2.13							0.66	220	2		10
D125549		USGS		Geochemistry of rock samples from the National Geochemical Database: U.S. Geological Survey, Reston, VA.	U.S. Geological Survey	USGS		38.5	-104.867	0.01	70	70	70	DNAA	SEDIMENTARY	UNKNOWN	UNKNOWN	ARKOSE
D125549		USGS		Geochemistry of rock samples from the National Geochemical Database: U.S. Geological Survey, Reston, VA.	U.S. Geological Survey	USGS		38.5	-104.867	0.01	70	70	70	ICPAES	SEDIMENTARY	UNKNOWN	UNKNOWN	ARKOSE																									1.4		7.1
D125549		USGS		Geochemistry of rock samples from the National Geochemical Database: U.S. Geological Survey, Reston, VA.	U.S. Geological Survey	USGS		38.5	-104.867	0.01	70	70	70	UNKNOWN	SEDIMENTARY	UNKNOWN	UNKNOWN	ARKOSE		77.3		8.18							0.87	3.2	0.83	3							3	530			6
D125550		USGS		Geochemistry of rock samples from the National Geochemical Database: U.S. Geological Survey, Reston, VA.	U.S. Geological Survey	USGS		40.3667	-105.133	0.01	70	70	70	DNAA	SEDIMENTARY	UNKNOWN	UNKNOWN	ARKOSE
D125550		USGS		Geochemistry of rock samples from the National Geochemical Database: U.S. Geological Survey, Reston, VA.	U.S. Geological Survey	USGS		40.3667	-105.133	0.01	70	70	70	ICPAES	SEDIMENTARY	UNKNOWN	UNKNOWN	ARKOSE																									1.4	0.099	5.7
D125550		USGS		Geochemistry of rock samples from the National Geochemical Database: U.S. Geological Survey, Reston, VA.	U.S. Geological Survey	USGS		40.3667	-105.133	0.01	70	70	70	UNKNOWN	SEDIMENTARY	UNKNOWN	UNKNOWN	ARKOSE		71.9		7.01							0.52	8.7	0.74	3							0.4	440			5
D125551		USGS		Geochemistry of rock samples from the National Geochemical Database: U.S. Geological Survey, Reston, VA.	U.S. Geological Survey	USGS		39.5	-105.133	0.01	70	70	70	DNAA	SEDIMENTARY	UNKNOWN	UNKNOWN	ARKOSE
D125551		USGS		Geochemistry of rock samples from the National Geochemical Database: U.S. Geological Survey, Reston, VA.	U.S. Geological Survey	USGS		39.5	-105.133	0.01	70	70	70	ICPAES	SEDIMENTARY	UNKNOWN	UNKNOWN	ARKOSE																									1.6		2.2
D125551		USGS		Geochemistry of rock samples from the National Geochemical Database: U.S. Geological Survey, Reston, VA.	U.S. Geological Survey	USGS		39.5	-105.133	0.01	70	70	70	UNKNOWN	SEDIMENTARY	UNKNOWN	UNKNOWN	ARKOSE		80.4		9.58							0.13	0.06	0.21	5.63							0.24	29			6
D125552		USGS		Geochemistry of rock samples from the National Geochemical Database: U.S. Geological Survey, Reston, VA.	U.S. Geological Survey	USGS		40.5	-105.25	0.01	70	70	70	DNAA	SEDIMENTARY	UNKNOWN	UNKNOWN	ARKOSE
D125552		USGS		Geochemistry of rock samples from the National Geochemical Database: U.S. Geological Survey, Reston, VA.	U.S. Geological Survey	USGS		40.5	-105.25	0.01	70	70	70	ICPAES	SEDIMENTARY	UNKNOWN	UNKNOWN	ARKOSE																									0.56		3
D125552		USGS		Geochemistry of rock samples from the National Geochemical Database: U.S. Geological Survey, Reston, VA.	U.S. Geological Survey	USGS		40.5	-105.25	0.01	70	70	70	UNKNOWN	SEDIMENTARY	UNKNOWN	UNKNOWN	ARKOSE		86.8		7.81							0.44	0.14	2.3	0.78							0.25	46	2		17
D125553		USGS		Geochemistry of rock samples from the National Geochemical Database: U.S. Geological Survey, Reston, VA.	U.S. Geological Survey	USGS		39.5	-105.133	0.01	70	70	70	DNAA	SEDIMENTARY	UNKNOWN	UNKNOWN	ARKOSE
D125553		USGS		Geochemistry of rock samples from the National Geochemical Database: U.S. Geological Survey, Reston, VA.	U.S. Geological Survey	USGS		39.5	-105.133	0.01	70	70	70	ICPAES	SEDIMENTARY	UNKNOWN	UNKNOWN	ARKOSE																									9.6		6.5
D125553		USGS		Geochemistry of rock samples from the National Geochemical Database: U.S. Geological Survey, Reston, VA.	U.S. Geological Survey	USGS		39.5	-105.133	0.01	70	70	70	UNKNOWN	SEDIMENTARY	UNKNOWN	UNKNOWN	ARKOSE		81.2		7.55							0.25	0.12	0.16	4.29							4.3	120	16		23
D125554		USGS		Geochemistry of rock samples from the National Geochemical Database: U.S. Geological Survey, Reston, VA.	U.S. Geological Survey	USGS		38.5	-104.867	0.01	70	70	70	DNAA	SEDIMENTARY	UNKNOWN	UNKNOWN	ARKOSE
D125554		USGS		Geochemistry of rock samples from the National Geochemical Database: U.S. Geological Survey, Reston, VA.	U.S. Geological Survey	USGS		38.5	-104.867	0.01	70	70	70	ICPAES	SEDIMENTARY	UNKNOWN	UNKNOWN	ARKOSE																									1.5	0.086	5
D125554		USGS		Geochemistry of rock samples from the National Geochemical Database: U.S. Geological Survey, Reston, VA.	U.S. Geological Survey	USGS		38.5	-104.867	0.01	70	70	70	UNKNOWN	SEDIMENTARY	UNKNOWN	UNKNOWN	ARKOSE		68.2		7.07							2.11	6.1	0.36	3.11							0.73	400			6
D125555		USGS		Geochemistry of rock samples from the National Geochemical Database: U.S. Geological Survey, Reston, VA.	U.S. Geological Survey	USGS		40.3667	-105.133	0.01	70	70	70	DNAA	SEDIMENTARY	UNKNOWN	UNKNOWN	ARKOSE
D125555		USGS		Geochemistry of rock samples from the National Geochemical Database: U.S. Geological Survey, Reston, VA.	U.S. Geological Survey	USGS		40.3667	-105.133	0.01	70	70	70	ICPAES	SEDIMENTARY	UNKNOWN	UNKNOWN	ARKOSE																									0.4	0.31	4.1
D125555		USGS		Geochemistry of rock samples from the National Geochemical Database: U.S. Geological Survey, Reston, VA.	U.S. Geological Survey	USGS		40.3667	-105.133	0.01	70	70	70	UNKNOWN	SEDIMENTARY	UNKNOWN	UNKNOWN	ARKOSE		59.5		6.49							0.7	13.9	0.82	3.27							0.39	380			5
D125556		USGS		Geochemistry of rock samples from the National Geochemical Database: U.S. Geological Survey, Reston, VA.	U.S. Geological Survey	USGS		40.6333	-105.133	0.01	70	70	70	DNAA	SEDIMENTARY	UNKNOWN	UNKNOWN	ARKOSE
D125556		USGS		Geochemistry of rock samples from the National Geochemical Database: U.S. Geological Survey, Reston, VA.	U.S. Geological Survey	USGS		40.6333	-105.133	0.01	70	70	70	ICPAES	SEDIMENTARY	UNKNOWN	UNKNOWN	ARKOSE																									0.64	0.19	4.1
D125556		USGS		Geochemistry of rock samples from the National Geochemical Database: U.S. Geological Survey, Reston, VA.	U.S. Geological Survey	USGS		40.6333	-105.133	0.01	70	70	70	UNKNOWN	SEDIMENTARY	UNKNOWN	UNKNOWN	ARKOSE		61.3		6.49							0.63	12.6	1.33	2.26							0.28	700			7
D125557		USGS		Geochemistry of rock samples from the National Geochemical Database: U.S. Geological Survey, Reston, VA.	U.S. Geological Survey	USGS		40.3667	-105.133	0.01	70	70	70	DNAA	SEDIMENTARY	UNKNOWN	UNKNOWN	ARKOSE
D125557		USGS		Geochemistry of rock samples from the National Geochemical Database: U.S. Geological Survey, Reston, VA.	U.S. Geological Survey	USGS		40.3667	-105.133	0.01	70	70	70	ICPAES	SEDIMENTARY	UNKNOWN	UNKNOWN	ARKOSE																									1.8		6.8
D125557		USGS		Geochemistry of rock samples from the National Geochemical Database: U.S. Geological Survey, Reston, VA.	U.S. Geological Survey	USGS		40.3667	-105.133	0.01	70	70	70	UNKNOWN	SEDIMENTARY	UNKNOWN	UNKNOWN	ARKOSE		85.5		7.13							0.92	0.1	0.64	3							1.2	46			10
D125558		USGS		Geochemistry of rock samples from the National Geochemical Database: U.S. Geological Survey, Reston, VA.	U.S. Geological Survey	USGS		39.3667	-105	0.01	70	70	70	DNAA	SEDIMENTARY	UNKNOWN	UNKNOWN	ARKOSE
D125558		USGS		Geochemistry of rock samples from the National Geochemical Database: U.S. Geological Survey, Reston, VA.	U.S. Geological Survey	USGS		39.3667	-105	0.01	70	70	70	ICPAES	SEDIMENTARY	UNKNOWN	UNKNOWN	ARKOSE																									1.5		9.5
D125558		USGS		Geochemistry of rock samples from the National Geochemical Database: U.S. Geological Survey, Reston, VA.	U.S. Geological Survey	USGS		39.3667	-105	0.01	70	70	70	UNKNOWN	SEDIMENTARY	UNKNOWN	UNKNOWN	ARKOSE		80.1		11.8							0.13	0.03	0.21	6.25							0.73	67			5
D125559		USGS		Geochemistry of rock samples from the National Geochemical Database: U.S. Geological Survey, Reston, VA.	U.S. Geological Survey	USGS		40.3667	-105.133	0.01	70	70	70	DNAA	SEDIMENTARY	UNKNOWN	UNKNOWN	ARKOSE
D125559		USGS		Geochemistry of rock samples from the National Geochemical Database: U.S. Geological Survey, Reston, VA.	U.S. Geological Survey	USGS		40.3667	-105.133	0.01	70	70	70	ICPAES	SEDIMENTARY	UNKNOWN	UNKNOWN	ARKOSE																									0.97		2.1
D125559		USGS		Geochemistry of rock samples from the National Geochemical Database: U.S. Geological Survey, Reston, VA.	U.S. Geological Survey	USGS		40.3667	-105.133	0.01	70	70	70	UNKNOWN	SEDIMENTARY	UNKNOWN	UNKNOWN	ARKOSE		90.3		5.92							0.14	0.09	0.45	2.28							0.17	32			10
D125560		USGS		Geochemistry of rock samples from the National Geochemical Database: U.S. Geological Survey, Reston, VA.	U.S. Geological Survey	USGS		40.3667	-105.133	0.01	70	70	70	DNAA	SEDIMENTARY	UNKNOWN	UNKNOWN	ARKOSE
D125560		USGS		Geochemistry of rock samples from the National Geochemical Database: U.S. Geological Survey, Reston, VA.	U.S. Geological Survey	USGS		40.3667	-105.133	0.01	70	70	70	ICPAES	SEDIMENTARY	UNKNOWN	UNKNOWN	ARKOSE																									4.6	0.11	6
D125560		USGS		Geochemistry of rock samples from the National Geochemical Database: U.S. Geological Survey, Reston, VA.	U.S. Geological Survey	USGS		40.3667	-105.133	0.01	70	70	70	UNKNOWN	SEDIMENTARY	UNKNOWN	UNKNOWN	ARKOSE		70.9		6.46							4.12	11.5	0.98	3.25							0.36	400	3		12
D125561		USGS		Geochemistry of rock samples from the National Geochemical Database: U.S. Geological Survey, Reston, VA.	U.S. Geological Survey	USGS		38.5	-105.25	0.01	70	70	70	DNAA	SEDIMENTARY	UNKNOWN	UNKNOWN	ARKOSE
D125561		USGS		Geochemistry of rock samples from the National Geochemical Database: U.S. Geological Survey, Reston, VA.	U.S. Geological Survey	USGS		38.5	-105.25	0.01	70	70	70	ICPAES	SEDIMENTARY	UNKNOWN	UNKNOWN	ARKOSE																									2.6	0.059	36
D125561		USGS		Geochemistry of rock samples from the National Geochemical Database: U.S. Geological Survey, Reston, VA.	U.S. Geological Survey	USGS		38.5	-105.25	0.01	70	70	70	UNKNOWN	SEDIMENTARY	UNKNOWN	UNKNOWN	ARKOSE		77.2		8.4							1.44	2.4	0.13	5							1	400	15	3	7
D125562		USGS		Geochemistry of rock samples from the National Geochemical Database: U.S. Geological Survey, Reston, VA.	U.S. Geological Survey	USGS		38.5	-105.25	0.01	70	70	70	DNAA	SEDIMENTARY	UNKNOWN	UNKNOWN	ARKOSE
D125562		USGS		Geochemistry of rock samples from the National Geochemical Database: U.S. Geological Survey, Reston, VA.	U.S. Geological Survey	USGS		38.5	-105.25	0.01	70	70	70	ICPAES	SEDIMENTARY	UNKNOWN	UNKNOWN	ARKOSE																									1.1		14
D125562		USGS		Geochemistry of rock samples from the National Geochemical Database: U.S. Geological Survey, Reston, VA.	U.S. Geological Survey	USGS		38.5	-105.25	0.01	70	70	70	UNKNOWN	SEDIMENTARY	UNKNOWN	UNKNOWN	ARKOSE		77.2		7.29							0.81	1.3	0.15	5.43							0.9	690	12		3
D125563		USGS		Geochemistry of rock samples from the National Geochemical Database: U.S. Geological Survey, Reston, VA.	U.S. Geological Survey	USGS		39.3667	-105	0.01	70	70	70	DNAA	SEDIMENTARY	UNKNOWN	UNKNOWN	ARKOSE
D125563		USGS		Geochemistry of rock samples from the National Geochemical Database: U.S. Geological Survey, Reston, VA.	U.S. Geological Survey	USGS		39.3667	-105	0.01	70	70	70	ICPAES	SEDIMENTARY	UNKNOWN	UNKNOWN	ARKOSE																									7.6		9
D125563		USGS		Geochemistry of rock samples from the National Geochemical Database: U.S. Geological Survey, Reston, VA.	U.S. Geological Survey	USGS		39.3667	-105	0.01	70	70	70	UNKNOWN	SEDIMENTARY	UNKNOWN	UNKNOWN	ARKOSE		63.9		11.2							0.13	0.06	0.25	6.23							0.49	44			15
D125564		USGS		Geochemistry of rock samples from the National Geochemical Database: U.S. Geological Survey, Reston, VA.	U.S. Geological Survey	USGS		40.6333	-105.133	0.01	70	70	70	DNAA	SEDIMENTARY	UNKNOWN	UNKNOWN	ARKOSE
D125564		USGS		Geochemistry of rock samples from the National Geochemical Database: U.S. Geological Survey, Reston, VA.	U.S. Geological Survey	USGS		40.6333	-105.133	0.01	70	70	70	ICPAES	SEDIMENTARY	UNKNOWN	UNKNOWN	ARKOSE																									1.1		2.4
D125564		USGS		Geochemistry of rock samples from the National Geochemical Database: U.S. Geological Survey, Reston, VA.	U.S. Geological Survey	USGS		40.6333	-105.133	0.01	70	70	70	UNKNOWN	SEDIMENTARY	UNKNOWN	UNKNOWN	ARKOSE		90.5		3.84							0.12	0.04	0.75	1.76							0.17	18			15
D125565		USGS		Geochemistry of rock samples from the National Geochemical Database: U.S. Geological Survey, Reston, VA.	U.S. Geological Survey	USGS		40.5	-105.133	0.01	70	70	70	DNAA	SEDIMENTARY	UNKNOWN	UNKNOWN	ARKOSE
D125565		USGS		Geochemistry of rock samples from the National Geochemical Database: U.S. Geological Survey, Reston, VA.	U.S. Geological Survey	USGS		40.5	-105.133	0.01	70	70	70	ICPAES	SEDIMENTARY	UNKNOWN	UNKNOWN	ARKOSE																									2	0.2	9.5
D125565		USGS		Geochemistry of rock samples from the National Geochemical Database: U.S. Geological Survey, Reston, VA.	U.S. Geological Survey	USGS		40.5	-105.133	0.01	70	70	70	UNKNOWN	SEDIMENTARY	UNKNOWN	UNKNOWN	ARKOSE		73.8		7.69							0.88	5.55	0.33	2.48							0.6	700	9		11
D125566		USGS		Geochemistry of rock samples from the National Geochemical Database: U.S. Geological Survey, Reston, VA.	U.S. Geological Survey	USGS		38.5	-105.25	0.01	70	70	70	DNAA	SEDIMENTARY	UNKNOWN	UNKNOWN	ARKOSE
D125566		USGS		Geochemistry of rock samples from the National Geochemical Database: U.S. Geological Survey, Reston, VA.	U.S. Geological Survey	USGS		38.5	-105.25	0.01	70	70	70	ICPAES	SEDIMENTARY	UNKNOWN	UNKNOWN	ARKOSE																									21	0.23	48
D125566		USGS		Geochemistry of rock samples from the National Geochemical Database: U.S. Geological Survey, Reston, VA.	U.S. Geological Survey	USGS		38.5	-105.25	0.01	70	70	70	UNKNOWN	SEDIMENTARY	UNKNOWN	UNKNOWN	ARKOSE		57.3		7.29							3.24	5.8	0.12	4.25							1.2	1600	27	7	26
D125567		USGS		Geochemistry of rock samples from the National Geochemical Database: U.S. Geological Survey, Reston, VA.	U.S. Geological Survey	USGS		39.5	-105.133	0.01	70	70	70	DNAA	SEDIMENTARY	UNKNOWN	UNKNOWN	ARKOSE
D125567		USGS		Geochemistry of rock samples from the National Geochemical Database: U.S. Geological Survey, Reston, VA.	U.S. Geological Survey	USGS		39.5	-105.133	0.01	70	70	70	ICPAES	SEDIMENTARY	UNKNOWN	UNKNOWN	ARKOSE																									3.3		4.8
D125567		USGS		Geochemistry of rock samples from the National Geochemical Database: U.S. Geological Survey, Reston, VA.	U.S. Geological Survey	USGS		39.5	-105.133	0.01	70	70	70	UNKNOWN	SEDIMENTARY	UNKNOWN	UNKNOWN	ARKOSE		64.6		7.31							0.14	2.9	0.16	3.98							1.1	160			7
D125568		USGS		Geochemistry of rock samples from the National Geochemical Database: U.S. Geological Survey, Reston, VA.	U.S. Geological Survey	USGS		39.3667	-105	0.01	70	70	70	DNAA	SEDIMENTARY	UNKNOWN	UNKNOWN	ARKOSE
D125568		USGS		Geochemistry of rock samples from the National Geochemical Database: U.S. Geological Survey, Reston, VA.	U.S. Geological Survey	USGS		39.3667	-105	0.01	70	70	70	ICPAES	SEDIMENTARY	UNKNOWN	UNKNOWN	ARKOSE																									8.2		9.7
D125568		USGS		Geochemistry of rock samples from the National Geochemical Database: U.S. Geological Survey, Reston, VA.	U.S. Geological Survey	USGS		39.3667	-105	0.01	70	70	70	UNKNOWN	SEDIMENTARY	UNKNOWN	UNKNOWN	ARKOSE		65.8		10.3							0.13	0.04	0.25	6.23							0.54	44			14
D125569		USGS		Geochemistry of rock samples from the National Geochemical Database: U.S. Geological Survey, Reston, VA.	U.S. Geological Survey	USGS		40.5	-105.133	0.01	70	70	70	DNAA	SEDIMENTARY	UNKNOWN	UNKNOWN	ARKOSE
D125569		USGS		Geochemistry of rock samples from the National Geochemical Database: U.S. Geological Survey, Reston, VA.	U.S. Geological Survey	USGS		40.5	-105.133	0.01	70	70	70	ICPAES	SEDIMENTARY	UNKNOWN	UNKNOWN	ARKOSE																									1.3		9.1
D125569		USGS		Geochemistry of rock samples from the National Geochemical Database: U.S. Geological Survey, Reston, VA.	U.S. Geological Survey	USGS		40.5	-105.133	0.01	70	70	70	UNKNOWN	SEDIMENTARY	UNKNOWN	UNKNOWN	ARKOSE		80.5		9.23							0.92	2.15	0.7	3.38							0.76	200	2		7
D125570		USGS		Geochemistry of rock samples from the National Geochemical Database: U.S. Geological Survey, Reston, VA.	U.S. Geological Survey	USGS		40.3667	-105.133	0.01	70	70	70	DNAA	SEDIMENTARY	UNKNOWN	UNKNOWN	ARKOSE
D125570		USGS		Geochemistry of rock samples from the National Geochemical Database: U.S. Geological Survey, Reston, VA.	U.S. Geological Survey	USGS		40.3667	-105.133	0.01	70	70	70	ICPAES	SEDIMENTARY	UNKNOWN	UNKNOWN	ARKOSE																									1.3		3.2
D125570		USGS		Geochemistry of rock samples from the National Geochemical Database: U.S. Geological Survey, Reston, VA.	U.S. Geological Survey	USGS		40.3667	-105.133	0.01	70	70	70	UNKNOWN	SEDIMENTARY	UNKNOWN	UNKNOWN	ARKOSE		84.1		6.84							0.25	1.65	0.35	4.5							0.85	92			6
D125571		USGS		Geochemistry of rock samples from the National Geochemical Database: U.S. Geological Survey, Reston, VA.	U.S. Geological Survey	USGS		40.3667	-105.133	0.01	70	70	70	DNAA	SEDIMENTARY	UNKNOWN	UNKNOWN	ARKOSE
D125571		USGS		Geochemistry of rock samples from the National Geochemical Database: U.S. Geological Survey, Reston, VA.	U.S. Geological Survey	USGS		40.3667	-105.133	0.01	70	70	70	ICPAES	SEDIMENTARY	UNKNOWN	UNKNOWN	ARKOSE																									1	0.099	5.3
D125571		USGS		Geochemistry of rock samples from the National Geochemical Database: U.S. Geological Survey, Reston, VA.	U.S. Geological Survey	USGS		40.3667	-105.133	0.01	70	70	70	UNKNOWN	SEDIMENTARY	UNKNOWN	UNKNOWN	ARKOSE		53.6		4.8							0.53	15	0.49	2.4							0.46	290			6
D125572		USGS		Geochemistry of rock samples from the National Geochemical Database: U.S. Geological Survey, Reston, VA.	U.S. Geological Survey	USGS		38.5	-105.25	0.01	70	70	70	DNAA	SEDIMENTARY	UNKNOWN	UNKNOWN	ARKOSE
D125572		USGS		Geochemistry of rock samples from the National Geochemical Database: U.S. Geological Survey, Reston, VA.	U.S. Geological Survey	USGS		38.5	-105.25	0.01	70	70	70	ICPAES	SEDIMENTARY	UNKNOWN	UNKNOWN	ARKOSE																									7.2		23
D125572		USGS		Geochemistry of rock samples from the National Geochemical Database: U.S. Geological Survey, Reston, VA.	U.S. Geological Survey	USGS		38.5	-105.25	0.01	70	70	70	UNKNOWN	SEDIMENTARY	UNKNOWN	UNKNOWN	ARKOSE		65.3		8.92							0.85	1.5	0.13	4.53							3.9	390	9		13
D125573		USGS		Geochemistry of rock samples from the National Geochemical Database: U.S. Geological Survey, Reston, VA.	U.S. Geological Survey	USGS		38.5	-104.867	0.01	70	70	70	DNAA	SEDIMENTARY	UNKNOWN	UNKNOWN	ARKOSE
D125573		USGS		Geochemistry of rock samples from the National Geochemical Database: U.S. Geological Survey, Reston, VA.	U.S. Geological Survey	USGS		38.5	-104.867	0.01	70	70	70	ICPAES	SEDIMENTARY	UNKNOWN	UNKNOWN	ARKOSE																									1.4		5.1
D125573		USGS		Geochemistry of rock samples from the National Geochemical Database: U.S. Geological Survey, Reston, VA.	U.S. Geological Survey	USGS		38.5	-104.867	0.01	70	70	70	UNKNOWN	SEDIMENTARY	UNKNOWN	UNKNOWN	ARKOSE		69.6		7.06							0.61	3.15	0.69	3.13							1	310			7
D125574		USGS		Geochemistry of rock samples from the National Geochemical Database: U.S. Geological Survey, Reston, VA.	U.S. Geological Survey	USGS		39.5	-105.133	0.01	70	70	70	DNAA	SEDIMENTARY	UNKNOWN	UNKNOWN	ARKOSE
D125574		USGS		Geochemistry of rock samples from the National Geochemical Database: U.S. Geological Survey, Reston, VA.	U.S. Geological Survey	USGS		39.5	-105.133	0.01	70	70	70	ICPAES	SEDIMENTARY	UNKNOWN	UNKNOWN	ARKOSE																									1.2		13
D125574		USGS		Geochemistry of rock samples from the National Geochemical Database: U.S. Geological Survey, Reston, VA.	U.S. Geological Survey	USGS		39.5	-105.133	0.01	70	70	70	UNKNOWN	SEDIMENTARY	UNKNOWN	UNKNOWN	ARKOSE		71.7		6.72							1.07	1.4	0.31	7.38							1.2	800	10	1	7
D125575		USGS		Geochemistry of rock samples from the National Geochemical Database: U.S. Geological Survey, Reston, VA.	U.S. Geological Survey	USGS		38.5	-104.867	0.01	70	70	70	DNAA	SEDIMENTARY	UNKNOWN	UNKNOWN	ARKOSE
D125575		USGS		Geochemistry of rock samples from the National Geochemical Database: U.S. Geological Survey, Reston, VA.	U.S. Geological Survey	USGS		38.5	-104.867	0.01	70	70	70	ICPAES	SEDIMENTARY	UNKNOWN	UNKNOWN	ARKOSE																									0.95		9.3
D125575		USGS		Geochemistry of rock samples from the National Geochemical Database: U.S. Geological Survey, Reston, VA.	U.S. Geological Survey	USGS		38.5	-104.867	0.01	70	70	70	UNKNOWN	SEDIMENTARY	UNKNOWN	UNKNOWN	ARKOSE		77.6		4.35							0.22	0.43	0.09	2.13							0.6	300	13	9	4
D125576		USGS		Geochemistry of rock samples from the National Geochemical Database: U.S. Geological Survey, Reston, VA.	U.S. Geological Survey	USGS		38.5	-105.25	0.01	70	70	70	DNAA	SEDIMENTARY	UNKNOWN	UNKNOWN	ARKOSE
D125576		USGS		Geochemistry of rock samples from the National Geochemical Database: U.S. Geological Survey, Reston, VA.	U.S. Geological Survey	USGS		38.5	-105.25	0.01	70	70	70	ICPAES	SEDIMENTARY	UNKNOWN	UNKNOWN	ARKOSE																									5.9	0.1	21
D125576		USGS		Geochemistry of rock samples from the National Geochemical Database: U.S. Geological Survey, Reston, VA.	U.S. Geological Survey	USGS		38.5	-105.25	0.01	70	70	70	UNKNOWN	SEDIMENTARY	UNKNOWN	UNKNOWN	ARKOSE		63.5		8.35							1.24	2.7	0.16	5.03							1.1	610	13		12
D125577		USGS		Geochemistry of rock samples from the National Geochemical Database: U.S. Geological Survey, Reston, VA.	U.S. Geological Survey	USGS		39.3667	-105	0.01	70	70	70	DNAA	SEDIMENTARY	UNKNOWN	UNKNOWN	ARKOSE
D125577		USGS		Geochemistry of rock samples from the National Geochemical Database: U.S. Geological Survey, Reston, VA.	U.S. Geological Survey	USGS		39.3667	-105	0.01	70	70	70	ICPAES	SEDIMENTARY	UNKNOWN	UNKNOWN	ARKOSE																									1.8		15
D125577		USGS		Geochemistry of rock samples from the National Geochemical Database: U.S. Geological Survey, Reston, VA.	U.S. Geological Survey	USGS		39.3667	-105	0.01	70	70	70	UNKNOWN	SEDIMENTARY	UNKNOWN	UNKNOWN	ARKOSE		67.1		11.4							0.17	0.03	0.23	6.63							0.58	73			7
D125578		USGS		Geochemistry of rock samples from the National Geochemical Database: U.S. Geological Survey, Reston, VA.	U.S. Geological Survey	USGS		40.3667	-105.133	0.01	70	70	70	DNAA	SEDIMENTARY	UNKNOWN	UNKNOWN	ARKOSE
D125578		USGS		Geochemistry of rock samples from the National Geochemical Database: U.S. Geological Survey, Reston, VA.	U.S. Geological Survey	USGS		40.3667	-105.133	0.01	70	70	70	ICPAES	SEDIMENTARY	UNKNOWN	UNKNOWN	ARKOSE																									1.2		2.2
D125578		USGS		Geochemistry of rock samples from the National Geochemical Database: U.S. Geological Survey, Reston, VA.	U.S. Geological Survey	USGS		40.3667	-105.133	0.01	70	70	70	UNKNOWN	SEDIMENTARY	UNKNOWN	UNKNOWN	ARKOSE		74.9		5.66							0.41	1.2	0.11	3.25							0.4	60			5
D125579		USGS		Geochemistry of rock samples from the National Geochemical Database: U.S. Geological Survey, Reston, VA.	U.S. Geological Survey	USGS		40.3667	-105.133	0.01	70	70	70	DNAA	SEDIMENTARY	UNKNOWN	UNKNOWN	ARKOSE
D125579		USGS		Geochemistry of rock samples from the National Geochemical Database: U.S. Geological Survey, Reston, VA.	U.S. Geological Survey	USGS		40.3667	-105.133	0.01	70	70	70	ICPAES	SEDIMENTARY	UNKNOWN	UNKNOWN	ARKOSE																									1.4	0.12	4.9
D125579		USGS		Geochemistry of rock samples from the National Geochemical Database: U.S. Geological Survey, Reston, VA.	U.S. Geological Survey	USGS		40.3667	-105.133	0.01	70	70	70	UNKNOWN	SEDIMENTARY	UNKNOWN	UNKNOWN	ARKOSE		59.6		5.6							0.54	15.1	0.49	2.48							0.6	410	4		6
D125580		USGS		Geochemistry of rock samples from the National Geochemical Database: U.S. Geological Survey, Reston, VA.	U.S. Geological Survey	USGS		39.5	-105.133	0.01	70	70	70	DNAA	SEDIMENTARY	UNKNOWN	UNKNOWN	ARKOSE
D125580		USGS		Geochemistry of rock samples from the National Geochemical Database: U.S. Geological Survey, Reston, VA.	U.S. Geological Survey	USGS		39.5	-105.133	0.01	70	70	70	ICPAES	SEDIMENTARY	UNKNOWN	UNKNOWN	ARKOSE																									12	0.062	13
D125580		USGS		Geochemistry of rock samples from the National Geochemical Database: U.S. Geological Survey, Reston, VA.	U.S. Geological Survey	USGS		39.5	-105.133	0.01	70	70	70	UNKNOWN	SEDIMENTARY	UNKNOWN	UNKNOWN	ARKOSE		73.8		8.29							0.34	0.4	0.52	4.53							0.31	840	10		17
D125581		USGS		Geochemistry of rock samples from the National Geochemical Database: U.S. Geological Survey, Reston, VA.	U.S. Geological Survey	USGS		40.3667	-105.133	0.01	70	70	70	DNAA	SEDIMENTARY	UNKNOWN	UNKNOWN	ARKOSE
D125581		USGS		Geochemistry of rock samples from the National Geochemical Database: U.S. Geological Survey, Reston, VA.	U.S. Geological Survey	USGS		40.3667	-105.133	0.01	70	70	70	ICPAES	SEDIMENTARY	UNKNOWN	UNKNOWN	ARKOSE																									1.9		6
D125581		USGS		Geochemistry of rock samples from the National Geochemical Database: U.S. Geological Survey, Reston, VA.	U.S. Geological Survey	USGS		40.3667	-105.133	0.01	70	70	70	UNKNOWN	SEDIMENTARY	UNKNOWN	UNKNOWN	ARKOSE		72.3		3.45							0.38	4.18	0.51	2.13							0.3	370			8
D125582		USGS		Geochemistry of rock samples from the National Geochemical Database: U.S. Geological Survey, Reston, VA.	U.S. Geological Survey	USGS		40.5	-105.133	0.01	70	70	70	DNAA	SEDIMENTARY	UNKNOWN	UNKNOWN	ARKOSE
D125582		USGS		Geochemistry of rock samples from the National Geochemical Database: U.S. Geological Survey, Reston, VA.	U.S. Geological Survey	USGS		40.5	-105.133	0.01	70	70	70	ICPAES	SEDIMENTARY	UNKNOWN	UNKNOWN	ARKOSE																									1.2	0.078	4
D125582		USGS		Geochemistry of rock samples from the National Geochemical Database: U.S. Geological Survey, Reston, VA.	U.S. Geological Survey	USGS		40.5	-105.133	0.01	70	70	70	UNKNOWN	SEDIMENTARY	UNKNOWN	UNKNOWN	ARKOSE		75.1		7.18							0.62	2.9	0.15	1							0.48	520			9
D125583		USGS		Geochemistry of rock samples from the National Geochemical Database: U.S. Geological Survey, Reston, VA.	U.S. Geological Survey	USGS		38.5	-105.25	0.01	70	70	70	DNAA	SEDIMENTARY	UNKNOWN	UNKNOWN	ARKOSE
D125583		USGS		Geochemistry of rock samples from the National Geochemical Database: U.S. Geological Survey, Reston, VA.	U.S. Geological Survey	USGS		38.5	-105.25	0.01	70	70	70	ICPAES	SEDIMENTARY	UNKNOWN	UNKNOWN	ARKOSE																									1.3	0.073	15
D125583		USGS		Geochemistry of rock samples from the National Geochemical Database: U.S. Geological Survey, Reston, VA.	U.S. Geological Survey	USGS		38.5	-105.25	0.01	70	70	70	UNKNOWN	SEDIMENTARY	UNKNOWN	UNKNOWN	ARKOSE		73.8		7.01							0.78	1.3	0.15	5.58							0.86	720	11		6
D125584		USGS		Geochemistry of rock samples from the National Geochemical Database: U.S. Geological Survey, Reston, VA.	U.S. Geological Survey	USGS		39.3667	-105	0.01	70	70	70	DNAA	SEDIMENTARY	UNKNOWN	UNKNOWN	ARKOSE
D125584		USGS		Geochemistry of rock samples from the National Geochemical Database: U.S. Geological Survey, Reston, VA.	U.S. Geological Survey	USGS		39.3667	-105	0.01	70	70	70	ICPAES	SEDIMENTARY	UNKNOWN	UNKNOWN	ARKOSE																									5.6	0.24	23	0.67
D125584		USGS		Geochemistry of rock samples from the National Geochemical Database: U.S. Geological Survey, Reston, VA.	U.S. Geological Survey	USGS		39.3667	-105	0.01	70	70	70	UNKNOWN	SEDIMENTARY	UNKNOWN	UNKNOWN	ARKOSE		82.4		9.51							0.11	0.04	0.19	5.33							1.1	100			8
D125585		USGS		Geochemistry of rock samples from the National Geochemical Database: U.S. Geological Survey, Reston, VA.	U.S. Geological Survey	USGS		40.3667	-105.133	0.01	70	70	70	DNAA	SEDIMENTARY	UNKNOWN	UNKNOWN	ARKOSE
D125585		USGS		Geochemistry of rock samples from the National Geochemical Database: U.S. Geological Survey, Reston, VA.	U.S. Geological Survey	USGS		40.3667	-105.133	0.01	70	70	70	ICPAES	SEDIMENTARY	UNKNOWN	UNKNOWN	ARKOSE																									1.3		3.7
D125585		USGS		Geochemistry of rock samples from the National Geochemical Database: U.S. Geological Survey, Reston, VA.	U.S. Geological Survey	USGS		40.3667	-105.133	0.01	70	70	70	UNKNOWN	SEDIMENTARY	UNKNOWN	UNKNOWN	ARKOSE		79.8		7.81							0.25	1.68	0.37	4.55							0.72	78			4
D125586		USGS		Geochemistry of rock samples from the National Geochemical Database: U.S. Geological Survey, Reston, VA.	U.S. Geological Survey	USGS		40.6333	-105.133	0.01	70	70	70	DNAA	SEDIMENTARY	UNKNOWN	UNKNOWN	ARKOSE
D125586		USGS		Geochemistry of rock samples from the National Geochemical Database: U.S. Geological Survey, Reston, VA.	U.S. Geological Survey	USGS		40.6333	-105.133	0.01	70	70	70	ICPAES	SEDIMENTARY	UNKNOWN	UNKNOWN	ARKOSE																									1.3	0.18	4.1
D125586		USGS		Geochemistry of rock samples from the National Geochemical Database: U.S. Geological Survey, Reston, VA.	U.S. Geological Survey	USGS		40.6333	-105.133	0.01	70	70	70	UNKNOWN	SEDIMENTARY	UNKNOWN	UNKNOWN	ARKOSE		61.6		6.74							0.36	11.2	0.86	3.4							0.33	380			10
D125587		USGS		Geochemistry of rock samples from the National Geochemical Database: U.S. Geological Survey, Reston, VA.	U.S. Geological Survey	USGS		40.3667	-105.133	0.01	70	70	70	DNAA	SEDIMENTARY	UNKNOWN	UNKNOWN	ARKOSE
D125587		USGS		Geochemistry of rock samples from the National Geochemical Database: U.S. Geological Survey, Reston, VA.	U.S. Geological Survey	USGS		40.3667	-105.133	0.01	70	70	70	ICPAES	SEDIMENTARY	UNKNOWN	UNKNOWN	ARKOSE																									1.7		7.2
D125587		USGS		Geochemistry of rock samples from the National Geochemical Database: U.S. Geological Survey, Reston, VA.	U.S. Geological Survey	USGS		40.3667	-105.133	0.01	70	70	70	UNKNOWN	SEDIMENTARY	UNKNOWN	UNKNOWN	ARKOSE		84.9		7.12							0.74	0.1	0.64	3.13							1.2	59			12
D125588		USGS		Geochemistry of rock samples from the National Geochemical Database: U.S. Geological Survey, Reston, VA.	U.S. Geological Survey	USGS		39.5	-105.133	0.01	70	70	70	DNAA	SEDIMENTARY	UNKNOWN	UNKNOWN	ARKOSE
D125588		USGS		Geochemistry of rock samples from the National Geochemical Database: U.S. Geological Survey, Reston, VA.	U.S. Geological Survey	USGS		39.5	-105.133	0.01	70	70	70	ICPAES	SEDIMENTARY	UNKNOWN	UNKNOWN	ARKOSE																									16	0.065	2.9
D125588		USGS		Geochemistry of rock samples from the National Geochemical Database: U.S. Geological Survey, Reston, VA.	U.S. Geological Survey	USGS		39.5	-105.133	0.01	70	70	70	UNKNOWN	SEDIMENTARY	UNKNOWN	UNKNOWN	ARKOSE		69.8		7.18							0.11	6.2	0.18	4.4							0.51	260			21
D125589		USGS		Geochemistry of rock samples from the National Geochemical Database: U.S. Geological Survey, Reston, VA.	U.S. Geological Survey	USGS		39.3667	-105	0.01	70	70	70	DNAA	SEDIMENTARY	UNKNOWN	UNKNOWN	ARKOSE
D125589		USGS		Geochemistry of rock samples from the National Geochemical Database: U.S. Geological Survey, Reston, VA.	U.S. Geological Survey	USGS		39.3667	-105	0.01	70	70	70	ICPAES	SEDIMENTARY	UNKNOWN	UNKNOWN	ARKOSE																									4.8	0.22	21
D125589		USGS		Geochemistry of rock samples from the National Geochemical Database: U.S. Geological Survey, Reston, VA.	U.S. Geological Survey	USGS		39.3667	-105	0.01	70	70	70	UNKNOWN	SEDIMENTARY	UNKNOWN	UNKNOWN	ARKOSE		79.2		9.11							0.11	0.06	0.18	5.1							1.7	170			10
D125590		USGS		Geochemistry of rock samples from the National Geochemical Database: U.S. Geological Survey, Reston, VA.	U.S. Geological Survey	USGS		40.3667	-105.133	0.01	70	70	70	DNAA	SEDIMENTARY	UNKNOWN	UNKNOWN	ARKOSE
D125590		USGS		Geochemistry of rock samples from the National Geochemical Database: U.S. Geological Survey, Reston, VA.	U.S. Geological Survey	USGS		40.3667	-105.133	0.01	70	70	70	ICPAES	SEDIMENTARY	UNKNOWN	UNKNOWN	ARKOSE																									1.5		4.8
D125590		USGS		Geochemistry of rock samples from the National Geochemical Database: U.S. Geological Survey, Reston, VA.	U.S. Geological Survey	USGS		40.3667	-105.133	0.01	70	70	70	UNKNOWN	SEDIMENTARY	UNKNOWN	UNKNOWN	ARKOSE		78.4		6.26							0.29	1.15	0.93	3.35							0.26	110			9
D125591		USGS		Geochemistry of rock samples from the National Geochemical Database: U.S. Geological Survey, Reston, VA.	U.S. Geological Survey	USGS		39.5	-105.133	0.01	70	70	70	DNAA	SEDIMENTARY	UNKNOWN	UNKNOWN	ARKOSE
D125591		USGS		Geochemistry of rock samples from the National Geochemical Database: U.S. Geological Survey, Reston, VA.	U.S. Geological Survey	USGS		39.5	-105.133	0.01	70	70	70	ICPAES	SEDIMENTARY	UNKNOWN	UNKNOWN	ARKOSE																									1.4		4.7
D125591		USGS		Geochemistry of rock samples from the National Geochemical Database: U.S. Geological Survey, Reston, VA.	U.S. Geological Survey	USGS		39.5	-105.133	0.01	70	70	70	UNKNOWN	SEDIMENTARY	UNKNOWN	UNKNOWN	ARKOSE		76.2		8.32							0.2	0.1	0.16	4.23							1.1	89	3		5
D125592		USGS		Geochemistry of rock samples from the National Geochemical Database: U.S. Geological Survey, Reston, VA.	U.S. Geological Survey	USGS		39.3667	-105	0.01	70	70	70	DNAA	SEDIMENTARY	UNKNOWN	UNKNOWN	ARKOSE
D125592		USGS		Geochemistry of rock samples from the National Geochemical Database: U.S. Geological Survey, Reston, VA.	U.S. Geological Survey	USGS		39.3667	-105	0.01	70	70	70	ICPAES	SEDIMENTARY	UNKNOWN	UNKNOWN	ARKOSE																									23		25
D125592		USGS		Geochemistry of rock samples from the National Geochemical Database: U.S. Geological Survey, Reston, VA.	U.S. Geological Survey	USGS		39.3667	-105	0.01	70	70	70	UNKNOWN	SEDIMENTARY	UNKNOWN	UNKNOWN	ARKOSE		68.9		12.4							0.23	0.08	0.22	5.38							0.55	60			27
D125593		USGS		Geochemistry of rock samples from the National Geochemical Database: U.S. Geological Survey, Reston, VA.	U.S. Geological Survey	USGS		40.5	-105.133	0.01	70	70	70	DNAA	SEDIMENTARY	UNKNOWN	UNKNOWN	ARKOSE
D125593		USGS		Geochemistry of rock samples from the National Geochemical Database: U.S. Geological Survey, Reston, VA.	U.S. Geological Survey	USGS		40.5	-105.133	0.01	70	70	70	ICPAES	SEDIMENTARY	UNKNOWN	UNKNOWN	ARKOSE																									1.2		9.6	0.82
D125593		USGS		Geochemistry of rock samples from the National Geochemical Database: U.S. Geological Survey, Reston, VA.	U.S. Geological Survey	USGS		40.5	-105.133	0.01	70	70	70	UNKNOWN	SEDIMENTARY	UNKNOWN	UNKNOWN	ARKOSE		57.6		4.44							4.25	8.6	0.37	2.55							0.49	890	5		7
D125594		USGS		Geochemistry of rock samples from the National Geochemical Database: U.S. Geological Survey, Reston, VA.	U.S. Geological Survey	USGS		40.6333	-105.133	0.01	70	70	70	DNAA	SEDIMENTARY	UNKNOWN	UNKNOWN	ARKOSE
D125594		USGS		Geochemistry of rock samples from the National Geochemical Database: U.S. Geological Survey, Reston, VA.	U.S. Geological Survey	USGS		40.6333	-105.133	0.01	70	70	70	ICPAES	SEDIMENTARY	UNKNOWN	UNKNOWN	ARKOSE																									1.5	0.13	9.4
D125594		USGS		Geochemistry of rock samples from the National Geochemical Database: U.S. Geological Survey, Reston, VA.	U.S. Geological Survey	USGS		40.6333	-105.133	0.01	70	70	70	UNKNOWN	SEDIMENTARY	UNKNOWN	UNKNOWN	ARKOSE		58.8		6.54							0.77	10.8	0.75	2.48							0.6	600	3		5
D125595		USGS		Geochemistry of rock samples from the National Geochemical Database: U.S. Geological Survey, Reston, VA.	U.S. Geological Survey	USGS		38.5	-105.25	0.01	70	70	70	DNAA	SEDIMENTARY	UNKNOWN	UNKNOWN	ARKOSE
D125595		USGS		Geochemistry of rock samples from the National Geochemical Database: U.S. Geological Survey, Reston, VA.	U.S. Geological Survey	USGS		38.5	-105.25	0.01	70	70	70	ICPAES	SEDIMENTARY	UNKNOWN	UNKNOWN	ARKOSE																									4	0.14	26
D125595		USGS		Geochemistry of rock samples from the National Geochemical Database: U.S. Geological Survey, Reston, VA.	U.S. Geological Survey	USGS		38.5	-105.25	0.01	70	70	70	UNKNOWN	SEDIMENTARY	UNKNOWN	UNKNOWN	ARKOSE		69		9.96							1.52	2.7	0.18	5.9							1	200	16		8
D125596		USGS		Geochemistry of rock samples from the National Geochemical Database: U.S. Geological Survey, Reston, VA.	U.S. Geological Survey	USGS		40.5	-105.133	0.01	70	70	70	DNAA	SEDIMENTARY	UNKNOWN	UNKNOWN	ARKOSE
D125596		USGS		Geochemistry of rock samples from the National Geochemical Database: U.S. Geological Survey, Reston, VA.	U.S. Geological Survey	USGS		40.5	-105.133	0.01	70	70	70	ICPAES	SEDIMENTARY	UNKNOWN	UNKNOWN	ARKOSE																									0.86		3.5
D125596		USGS		Geochemistry of rock samples from the National Geochemical Database: U.S. Geological Survey, Reston, VA.	U.S. Geological Survey	USGS		40.5	-105.133	0.01	70	70	70	UNKNOWN	SEDIMENTARY	UNKNOWN	UNKNOWN	ARKOSE		83.3		7.53							0.28	3.98	1.85	3.29							0.7	89			4
D125597		USGS		Geochemistry of rock samples from the National Geochemical Database: U.S. Geological Survey, Reston, VA.	U.S. Geological Survey	USGS		38.5	-104.867	0.01	70	70	70	DNAA	SEDIMENTARY	UNKNOWN	UNKNOWN	ARKOSE
D125597		USGS		Geochemistry of rock samples from the National Geochemical Database: U.S. Geological Survey, Reston, VA.	U.S. Geological Survey	USGS		38.5	-104.867	0.01	70	70	70	ICPAES	SEDIMENTARY	UNKNOWN	UNKNOWN	ARKOSE																									1.7	0.17	5.4
D125597		USGS		Geochemistry of rock samples from the National Geochemical Database: U.S. Geological Survey, Reston, VA.	U.S. Geological Survey	USGS		38.5	-104.867	0.01	70	70	70	UNKNOWN	SEDIMENTARY	UNKNOWN	UNKNOWN	ARKOSE		51.9		5.91							0.36	11.7	0.64	3.2							0.77	400			7
D125598		USGS		Geochemistry of rock samples from the National Geochemical Database: U.S. Geological Survey, Reston, VA.	U.S. Geological Survey	USGS		38.5	-104.867	0.01	70	70	70	DNAA	SEDIMENTARY	UNKNOWN	UNKNOWN	ARKOSE
D125598		USGS		Geochemistry of rock samples from the National Geochemical Database: U.S. Geological Survey, Reston, VA.	U.S. Geological Survey	USGS		38.5	-104.867	0.01	70	70	70	ICPAES	SEDIMENTARY	UNKNOWN	UNKNOWN	ARKOSE																									1.9	0.093	5.9
D125598		USGS		Geochemistry of rock samples from the National Geochemical Database: U.S. Geological Survey, Reston, VA.	U.S. Geological Survey	USGS		38.5	-104.867	0.01	70	70	70	UNKNOWN	SEDIMENTARY	UNKNOWN	UNKNOWN	ARKOSE		59.4		6.28							2.12	6.2	0.36	3.08							0.69	830			8
D125599		USGS		Geochemistry of rock samples from the National Geochemical Database: U.S. Geological Survey, Reston, VA.	U.S. Geological Survey	USGS		40.3667	-105.133	0.01	70	70	70	DNAA	SEDIMENTARY	UNKNOWN	UNKNOWN	ARKOSE
D125599		USGS		Geochemistry of rock samples from the National Geochemical Database: U.S. Geological Survey, Reston, VA.	U.S. Geological Survey	USGS		40.3667	-105.133	0.01	70	70	70	ICPAES	SEDIMENTARY	UNKNOWN	UNKNOWN	ARKOSE																									0.62	0.15	9.2
D125599		USGS		Geochemistry of rock samples from the National Geochemical Database: U.S. Geological Survey, Reston, VA.	U.S. Geological Survey	USGS		40.3667	-105.133	0.01	70	70	70	UNKNOWN	SEDIMENTARY	UNKNOWN	UNKNOWN	ARKOSE		60.7		6.4							4	6.7	0.76	3.3							0.75	200			5
D125600		USGS		Geochemistry of rock samples from the National Geochemical Database: U.S. Geological Survey, Reston, VA.	U.S. Geological Survey	USGS		39.3667	-105	0.01	70	70	70	DNAA	SEDIMENTARY	UNKNOWN	UNKNOWN	ARKOSE
D125600		USGS		Geochemistry of rock samples from the National Geochemical Database: U.S. Geological Survey, Reston, VA.	U.S. Geological Survey	USGS		39.3667	-105	0.01	70	70	70	ICPAES	SEDIMENTARY	UNKNOWN	UNKNOWN	ARKOSE																									1.1		8.8
D125600		USGS		Geochemistry of rock samples from the National Geochemical Database: U.S. Geological Survey, Reston, VA.	U.S. Geological Survey	USGS		39.3667	-105	0.01	70	70	70	UNKNOWN	SEDIMENTARY	UNKNOWN	UNKNOWN	ARKOSE		77.7		8.1							0.19	0.1	0.15	5.23							0.44	37		1	2
D125601		USGS		Geochemistry of rock samples from the National Geochemical Database: U.S. Geological Survey, Reston, VA.	U.S. Geological Survey	USGS		40.3667	-105.133	0.01	70	70	70	DNAA	SEDIMENTARY	UNKNOWN	UNKNOWN	ARKOSE
D125601		USGS		Geochemistry of rock samples from the National Geochemical Database: U.S. Geological Survey, Reston, VA.	U.S. Geological Survey	USGS		40.3667	-105.133	0.01	70	70	70	ICPAES	SEDIMENTARY	UNKNOWN	UNKNOWN	ARKOSE																									0.69	0.14	9.3
D125601		USGS		Geochemistry of rock samples from the National Geochemical Database: U.S. Geological Survey, Reston, VA.	U.S. Geological Survey	USGS		40.3667	-105.133	0.01	70	70	70	UNKNOWN	SEDIMENTARY	UNKNOWN	UNKNOWN	ARKOSE		56		3.82							3.87	13.3	0.36	2.06							0.39	880	3		5
D125602		USGS		Geochemistry of rock samples from the National Geochemical Database: U.S. Geological Survey, Reston, VA.	U.S. Geological Survey	USGS		40.3667	-105.133	0.01	70	70	70	DNAA	SEDIMENTARY	UNKNOWN	UNKNOWN	ARKOSE
D125602		USGS		Geochemistry of rock samples from the National Geochemical Database: U.S. Geological Survey, Reston, VA.	U.S. Geological Survey	USGS		40.3667	-105.133	0.01	70	70	70	ICPAES	SEDIMENTARY	UNKNOWN	UNKNOWN	ARKOSE																									1.1		3.3
D125602		USGS		Geochemistry of rock samples from the National Geochemical Database: U.S. Geological Survey, Reston, VA.	U.S. Geological Survey	USGS		40.3667	-105.133	0.01	70	70	70	UNKNOWN	SEDIMENTARY	UNKNOWN	UNKNOWN	ARKOSE		60.1		4.47							2.26	8	0.31	3.04							0.51	410			7
D125603		USGS		Geochemistry of rock samples from the National Geochemical Database: U.S. Geological Survey, Reston, VA.	U.S. Geological Survey	USGS		39.5	-105.133	0.01	70	70	70	DNAA	SEDIMENTARY	UNKNOWN	UNKNOWN	ARKOSE
D125603		USGS		Geochemistry of rock samples from the National Geochemical Database: U.S. Geological Survey, Reston, VA.	U.S. Geological Survey	USGS		39.5	-105.133	0.01	70	70	70	ICPAES	SEDIMENTARY	UNKNOWN	UNKNOWN	ARKOSE																									1.9		2.7
D125603		USGS		Geochemistry of rock samples from the National Geochemical Database: U.S. Geological Survey, Reston, VA.	U.S. Geological Survey	USGS		39.5	-105.133	0.01	70	70	70	UNKNOWN	SEDIMENTARY	UNKNOWN	UNKNOWN	ARKOSE		75.9		11.2							0.14	0.08	0.26	4.25							1	53	2		7
D125604		USGS		Geochemistry of rock samples from the National Geochemical Database: U.S. Geological Survey, Reston, VA.	U.S. Geological Survey	USGS		38.5	-105.25	0.01	70	70	70	DNAA	SEDIMENTARY	UNKNOWN	UNKNOWN	ARKOSE
D125604		USGS		Geochemistry of rock samples from the National Geochemical Database: U.S. Geological Survey, Reston, VA.	U.S. Geological Survey	USGS		38.5	-105.25	0.01	70	70	70	ICPAES	SEDIMENTARY	UNKNOWN	UNKNOWN	ARKOSE																									3.5	0.25	37
D125604		USGS		Geochemistry of rock samples from the National Geochemical Database: U.S. Geological Survey, Reston, VA.	U.S. Geological Survey	USGS		38.5	-105.25	0.01	70	70	70	UNKNOWN	SEDIMENTARY	UNKNOWN	UNKNOWN	ARKOSE		64.5		7.65							1.9	2.4	0.1	4.05							2.9	840	20	8	8
D125605		USGS		Geochemistry of rock samples from the National Geochemical Database: U.S. Geological Survey, Reston, VA.	U.S. Geological Survey	USGS		40.5	-105.133	0.01	70	70	70	DNAA	SEDIMENTARY	UNKNOWN	UNKNOWN	ARKOSE
D125605		USGS		Geochemistry of rock samples from the National Geochemical Database: U.S. Geological Survey, Reston, VA.	U.S. Geological Survey	USGS		40.5	-105.133	0.01	70	70	70	ICPAES	SEDIMENTARY	UNKNOWN	UNKNOWN	ARKOSE																									1.4		15
D125605		USGS		Geochemistry of rock samples from the National Geochemical Database: U.S. Geological Survey, Reston, VA.	U.S. Geological Survey	USGS		40.5	-105.133	0.01	70	70	70	UNKNOWN	SEDIMENTARY	UNKNOWN	UNKNOWN	ARKOSE		75.9		9.38							1.3	0.6	0.53	2.76							1.6	140	14	1	10
D125606		USGS		Geochemistry of rock samples from the National Geochemical Database: U.S. Geological Survey, Reston, VA.	U.S. Geological Survey	USGS		39.3667	-105	0.01	70	70	70	DNAA	SEDIMENTARY	UNKNOWN	UNKNOWN	ARKOSE
D125606		USGS		Geochemistry of rock samples from the National Geochemical Database: U.S. Geological Survey, Reston, VA.	U.S. Geological Survey	USGS		39.3667	-105	0.01	70	70	70	ICPAES	SEDIMENTARY	UNKNOWN	UNKNOWN	ARKOSE																									2		11
D125606		USGS		Geochemistry of rock samples from the National Geochemical Database: U.S. Geological Survey, Reston, VA.	U.S. Geological Survey	USGS		39.3667	-105	0.01	70	70	70	UNKNOWN	SEDIMENTARY	UNKNOWN	UNKNOWN	ARKOSE		72.2		10.8							0.24	0.15	0.24	6.33							0.9	90			6
D125607		USGS		Geochemistry of rock samples from the National Geochemical Database: U.S. Geological Survey, Reston, VA.	U.S. Geological Survey	USGS		39.3667	-105	0.01	70	70	70	DNAA	SEDIMENTARY	UNKNOWN	UNKNOWN	ARKOSE
D125607		USGS		Geochemistry of rock samples from the National Geochemical Database: U.S. Geological Survey, Reston, VA.	U.S. Geological Survey	USGS		39.3667	-105	0.01	70	70	70	ICPAES	SEDIMENTARY	UNKNOWN	UNKNOWN	ARKOSE																									1.5	0.071	11
D125607		USGS		Geochemistry of rock samples from the National Geochemical Database: U.S. Geological Survey, Reston, VA.	U.S. Geological Survey	USGS		39.3667	-105	0.01	70	70	70	UNKNOWN	SEDIMENTARY	UNKNOWN	UNKNOWN	ARKOSE		70.9		9.86							0.19	0.1	0.19	5.25							1.9	120	3		8
D125608		USGS		Geochemistry of rock samples from the National Geochemical Database: U.S. Geological Survey, Reston, VA.	U.S. Geological Survey	USGS		40.3667	-105.133	0.01	70	70	70	DNAA	SEDIMENTARY	UNKNOWN	UNKNOWN	ARKOSE
D125608		USGS		Geochemistry of rock samples from the National Geochemical Database: U.S. Geological Survey, Reston, VA.	U.S. Geological Survey	USGS		40.3667	-105.133	0.01	70	70	70	ICPAES	SEDIMENTARY	UNKNOWN	UNKNOWN	ARKOSE																									1.7		5.9
D125608		USGS		Geochemistry of rock samples from the National Geochemical Database: U.S. Geological Survey, Reston, VA.	U.S. Geological Survey	USGS		40.3667	-105.133	0.01	70	70	70	UNKNOWN	SEDIMENTARY	UNKNOWN	UNKNOWN	ARKOSE		77		8.83							0.74	0.7	0.58	2.49							0.6	130	10		9
D125609		USGS		Geochemistry of rock samples from the National Geochemical Database: U.S. Geological Survey, Reston, VA.	U.S. Geological Survey	USGS		39.5	-105.133	0.01	70	70	70	DNAA	SEDIMENTARY	UNKNOWN	UNKNOWN	ARKOSE
D125609		USGS		Geochemistry of rock samples from the National Geochemical Database: U.S. Geological Survey, Reston, VA.	U.S. Geological Survey	USGS		39.5	-105.133	0.01	70	70	70	ICPAES	SEDIMENTARY	UNKNOWN	UNKNOWN	ARKOSE																									0.72	0.06	5.3
D125609		USGS		Geochemistry of rock samples from the National Geochemical Database: U.S. Geological Survey, Reston, VA.	U.S. Geological Survey	USGS		39.5	-105.133	0.01	70	70	70	UNKNOWN	SEDIMENTARY	UNKNOWN	UNKNOWN	ARKOSE		85.6		10.7							0.15	0.08	0.22	2.34							0.85	89			2
D125610		USGS		Geochemistry of rock samples from the National Geochemical Database: U.S. Geological Survey, Reston, VA.	U.S. Geological Survey	USGS		40.6333	-105.133	0.01	70	70	70	DNAA	SEDIMENTARY	UNKNOWN	UNKNOWN	ARKOSE
D125610		USGS		Geochemistry of rock samples from the National Geochemical Database: U.S. Geological Survey, Reston, VA.	U.S. Geological Survey	USGS		40.6333	-105.133	0.01	70	70	70	ICPAES	SEDIMENTARY	UNKNOWN	UNKNOWN	ARKOSE																									6.2		2.3
D125610		USGS		Geochemistry of rock samples from the National Geochemical Database: U.S. Geological Survey, Reston, VA.	U.S. Geological Survey	USGS		40.6333	-105.133	0.01	70	70	70	UNKNOWN	SEDIMENTARY	UNKNOWN	UNKNOWN	ARKOSE		91.8		7.69							0.26	0.25	1.83	2.58							0.1	160			19
D125611		USGS		Geochemistry of rock samples from the National Geochemical Database: U.S. Geological Survey, Reston, VA.	U.S. Geological Survey	USGS		40.5	-105.133	0.01	70	70	70	DNAA	SEDIMENTARY	UNKNOWN	UNKNOWN	ARKOSE
D125611		USGS		Geochemistry of rock samples from the National Geochemical Database: U.S. Geological Survey, Reston, VA.	U.S. Geological Survey	USGS		40.5	-105.133	0.01	70	70	70	ICPAES	SEDIMENTARY	UNKNOWN	UNKNOWN	ARKOSE																									0.77		6.6	0.84
D125611		USGS		Geochemistry of rock samples from the National Geochemical Database: U.S. Geological Survey, Reston, VA.	U.S. Geological Survey	USGS		40.5	-105.133	0.01	70	70	70	UNKNOWN	SEDIMENTARY	UNKNOWN	UNKNOWN	ARKOSE		88.9		8.47							2.47	5.1	0.73	3.15							0.6	450			5
D125612		USGS		Geochemistry of rock samples from the National Geochemical Database: U.S. Geological Survey, Reston, VA.	U.S. Geological Survey	USGS		38.5	-105.25	0.01	70	70	70	DNAA	SEDIMENTARY	UNKNOWN	UNKNOWN	ARKOSE
D125612		USGS		Geochemistry of rock samples from the National Geochemical Database: U.S. Geological Survey, Reston, VA.	U.S. Geological Survey	USGS		38.5	-105.25	0.01	70	70	70	ICPAES	SEDIMENTARY	UNKNOWN	UNKNOWN	ARKOSE																									19	0.24	44
D125612		USGS		Geochemistry of rock samples from the National Geochemical Database: U.S. Geological Survey, Reston, VA.	U.S. Geological Survey	USGS		38.5	-105.25	0.01	70	70	70	UNKNOWN	SEDIMENTARY	UNKNOWN	UNKNOWN	ARKOSE		71.6		8.02							3.1	4.7	0.13	3.85							1.1	1700	24	9	25
D125613		USGS		Geochemistry of rock samples from the National Geochemical Database: U.S. Geological Survey, Reston, VA.	U.S. Geological Survey	USGS		38.5	-105.25	0.01	70	70	70	DNAA	SEDIMENTARY	UNKNOWN	UNKNOWN	ARKOSE
D125613		USGS		Geochemistry of rock samples from the National Geochemical Database: U.S. Geological Survey, Reston, VA.	U.S. Geological Survey	USGS		38.5	-105.25	0.01	70	70	70	ICPAES	SEDIMENTARY	UNKNOWN	UNKNOWN	ARKOSE																									2.1	0.15	33
D125613		USGS		Geochemistry of rock samples from the National Geochemical Database: U.S. Geological Survey, Reston, VA.	U.S. Geological Survey	USGS		38.5	-105.25	0.01	70	70	70	UNKNOWN	SEDIMENTARY	UNKNOWN	UNKNOWN	ARKOSE		82.7		8.68							1.93	2.9	0.14	4.85							3.9	700	19	7	8
D125614		USGS		Geochemistry of rock samples from the National Geochemical Database: U.S. Geological Survey, Reston, VA.	U.S. Geological Survey	USGS		38.5	-104.867	0.01	70	70	70	DNAA	SEDIMENTARY	UNKNOWN	UNKNOWN	ARKOSE
D125614		USGS		Geochemistry of rock samples from the National Geochemical Database: U.S. Geological Survey, Reston, VA.	U.S. Geological Survey	USGS		38.5	-104.867	0.01	70	70	70	ICPAES	SEDIMENTARY	UNKNOWN	UNKNOWN	ARKOSE																									1.5		3.7
D125614		USGS		Geochemistry of rock samples from the National Geochemical Database: U.S. Geological Survey, Reston, VA.	U.S. Geological Survey	USGS		38.5	-104.867	0.01	70	70	70	UNKNOWN	SEDIMENTARY	UNKNOWN	UNKNOWN	ARKOSE		89.9		9.01							0.35	3.13	0.97	4.13							0.83	220			8
D125615		USGS		Geochemistry of rock samples from the National Geochemical Database: U.S. Geological Survey, Reston, VA.	U.S. Geological Survey	USGS		40.6333	-105.133	0.01	70	70	70	DNAA	SEDIMENTARY	UNKNOWN	UNKNOWN	ARKOSE
D125615		USGS		Geochemistry of rock samples from the National Geochemical Database: U.S. Geological Survey, Reston, VA.	U.S. Geological Survey	USGS		40.6333	-105.133	0.01	70	70	70	ICPAES	SEDIMENTARY	UNKNOWN	UNKNOWN	ARKOSE																									2.6	0.058	3.8
D125615		USGS		Geochemistry of rock samples from the National Geochemical Database: U.S. Geological Survey, Reston, VA.	U.S. Geological Survey	USGS		40.6333	-105.133	0.01	70	70	70	UNKNOWN	SEDIMENTARY	UNKNOWN	UNKNOWN	ARKOSE		92.8		8.8							0.25	0.1	1.53	2.68							0.13	570			17
D125616		USGS		Geochemistry of rock samples from the National Geochemical Database: U.S. Geological Survey, Reston, VA.	U.S. Geological Survey	USGS		38.5	-104.867	0.01	70	70	70	DNAA	SEDIMENTARY	UNKNOWN	UNKNOWN	ARKOSE
D125616		USGS		Geochemistry of rock samples from the National Geochemical Database: U.S. Geological Survey, Reston, VA.	U.S. Geological Survey	USGS		38.5	-104.867	0.01	70	70	70	ICPAES	SEDIMENTARY	UNKNOWN	UNKNOWN	ARKOSE																									1.7	0.18	5.7	0.92
D125616		USGS		Geochemistry of rock samples from the National Geochemical Database: U.S. Geological Survey, Reston, VA.	U.S. Geological Survey	USGS		38.5	-104.867	0.01	70	70	70	UNKNOWN	SEDIMENTARY	UNKNOWN	UNKNOWN	ARKOSE		70.5		6.85							0.33	10.6	0.66	2.85							0.87	280			6
D125617		USGS		Geochemistry of rock samples from the National Geochemical Database: U.S. Geological Survey, Reston, VA.	U.S. Geological Survey	USGS		40.6333	-105.133	0.01	70	70	70	DNAA	SEDIMENTARY	UNKNOWN	UNKNOWN	ARKOSE
D125617		USGS		Geochemistry of rock samples from the National Geochemical Database: U.S. Geological Survey, Reston, VA.	U.S. Geological Survey	USGS		40.6333	-105.133	0.01	70	70	70	ICPAES	SEDIMENTARY	UNKNOWN	UNKNOWN	ARKOSE																									0.64	0.28	4.3
D125617		USGS		Geochemistry of rock samples from the National Geochemical Database: U.S. Geological Survey, Reston, VA.	U.S. Geological Survey	USGS		40.6333	-105.133	0.01	70	70	70	UNKNOWN	SEDIMENTARY	UNKNOWN	UNKNOWN	ARKOSE		60.3		6.44							0.3	13.6	0.58	2.75							0.6	280			6
D125618		USGS		Geochemistry of rock samples from the National Geochemical Database: U.S. Geological Survey, Reston, VA.	U.S. Geological Survey	USGS		40.5	-105.25	0.01	70	70	70	DNAA	SEDIMENTARY	UNKNOWN	UNKNOWN	ARKOSE
D125618		USGS		Geochemistry of rock samples from the National Geochemical Database: U.S. Geological Survey, Reston, VA.	U.S. Geological Survey	USGS		40.5	-105.25	0.01	70	70	70	ICPAES	SEDIMENTARY	UNKNOWN	UNKNOWN	ARKOSE																									1.2		7.8
D125618		USGS		Geochemistry of rock samples from the National Geochemical Database: U.S. Geological Survey, Reston, VA.	U.S. Geological Survey	USGS		40.5	-105.25	0.01	70	70	70	UNKNOWN	SEDIMENTARY	UNKNOWN	UNKNOWN	ARKOSE		86.9		8.55							0.48	0.13	1.23	1.33							0.99	91	5		17
D125619		USGS		Geochemistry of rock samples from the National Geochemical Database: U.S. Geological Survey, Reston, VA.	U.S. Geological Survey	USGS		38.5	-105.25	0.01	70	70	70	DNAA	SEDIMENTARY	UNKNOWN	UNKNOWN	ARKOSE
D125619		USGS		Geochemistry of rock samples from the National Geochemical Database: U.S. Geological Survey, Reston, VA.	U.S. Geological Survey	USGS		38.5	-105.25	0.01	70	70	70	ICPAES	SEDIMENTARY	UNKNOWN	UNKNOWN	ARKOSE																									1.3	0.06	16	1
D125619		USGS		Geochemistry of rock samples from the National Geochemical Database: U.S. Geological Survey, Reston, VA.	U.S. Geological Survey	USGS		38.5	-105.25	0.01	70	70	70	UNKNOWN	SEDIMENTARY	UNKNOWN	UNKNOWN	ARKOSE		68.5		8.54							0.35	0.38	0.12	4.83							1.5	640	14		10
D125620		USGS		Geochemistry of rock samples from the National Geochemical Database: U.S. Geological Survey, Reston, VA.	U.S. Geological Survey	USGS		40.3667	-105.133	0.01	70	70	70	DNAA	SEDIMENTARY	UNKNOWN	UNKNOWN	ARKOSE
D125620		USGS		Geochemistry of rock samples from the National Geochemical Database: U.S. Geological Survey, Reston, VA.	U.S. Geological Survey	USGS		40.3667	-105.133	0.01	70	70	70	ICPAES	SEDIMENTARY	UNKNOWN	UNKNOWN	ARKOSE																									0.77		2.4
D125620		USGS		Geochemistry of rock samples from the National Geochemical Database: U.S. Geological Survey, Reston, VA.	U.S. Geological Survey	USGS		40.3667	-105.133	0.01	70	70	70	UNKNOWN	SEDIMENTARY	UNKNOWN	UNKNOWN	ARKOSE		70.7		8.91							0.44	1.15	1.35	3.1							0.38	61			5
D125621		USGS		Geochemistry of rock samples from the National Geochemical Database: U.S. Geological Survey, Reston, VA.	U.S. Geological Survey	USGS		40.5	-105.133	0.01	70	70	70	DNAA	SEDIMENTARY	UNKNOWN	UNKNOWN	ARKOSE
D125621		USGS		Geochemistry of rock samples from the National Geochemical Database: U.S. Geological Survey, Reston, VA.	U.S. Geological Survey	USGS		40.5	-105.133	0.01	70	70	70	ICPAES	SEDIMENTARY	UNKNOWN	UNKNOWN	ARKOSE																									1.7	0.082	10
D125621		USGS		Geochemistry of rock samples from the National Geochemical Database: U.S. Geological Survey, Reston, VA.	U.S. Geological Survey	USGS		40.5	-105.133	0.01	70	70	70	UNKNOWN	SEDIMENTARY	UNKNOWN	UNKNOWN	ARKOSE		73.4		8.5							1.13	2.5	0.5	2.48							1.2	300	5		10
D125622		USGS		Geochemistry of rock samples from the National Geochemical Database: U.S. Geological Survey, Reston, VA.	U.S. Geological Survey	USGS		38.5	-104.867	0.01	70	70	70	DNAA	SEDIMENTARY	UNKNOWN	UNKNOWN	ARKOSE
D125622		USGS		Geochemistry of rock samples from the National Geochemical Database: U.S. Geological Survey, Reston, VA.	U.S. Geological Survey	USGS		38.5	-104.867	0.01	70	70	70	ICPAES	SEDIMENTARY	UNKNOWN	UNKNOWN	ARKOSE																									1.9	0.12	7.2
D125622		USGS		Geochemistry of rock samples from the National Geochemical Database: U.S. Geological Survey, Reston, VA.	U.S. Geological Survey	USGS		38.5	-104.867	0.01	70	70	70	UNKNOWN	SEDIMENTARY	UNKNOWN	UNKNOWN	ARKOSE		72.5		2.61							2.48	6.3	0.37	2.93							0.81	400			7
D125623		USGS		Geochemistry of rock samples from the National Geochemical Database: U.S. Geological Survey, Reston, VA.	U.S. Geological Survey	USGS		40.6333	-105.133	0.01	70	70	70	DNAA	SEDIMENTARY	UNKNOWN	UNKNOWN	ARKOSE
D125623		USGS		Geochemistry of rock samples from the National Geochemical Database: U.S. Geological Survey, Reston, VA.	U.S. Geological Survey	USGS		40.6333	-105.133	0.01	70	70	70	ICPAES	SEDIMENTARY	UNKNOWN	UNKNOWN	ARKOSE																									0.9		0.83
D125623		USGS		Geochemistry of rock samples from the National Geochemical Database: U.S. Geological Survey, Reston, VA.	U.S. Geological Survey	USGS		40.6333	-105.133	0.01	70	70	70	UNKNOWN	SEDIMENTARY	UNKNOWN	UNKNOWN	ARKOSE		79.8		2.88							0.04	0.03	2	1.43							0.03	19			12
D125624		USGS		Geochemistry of rock samples from the National Geochemical Database: U.S. Geological Survey, Reston, VA.	U.S. Geological Survey	USGS		40.3667	-105.133	0.01	70	70	70	DNAA	SEDIMENTARY	UNKNOWN	UNKNOWN	ARKOSE
D125624		USGS		Geochemistry of rock samples from the National Geochemical Database: U.S. Geological Survey, Reston, VA.	U.S. Geological Survey	USGS		40.3667	-105.133	0.01	70	70	70	ICPAES	SEDIMENTARY	UNKNOWN	UNKNOWN	ARKOSE																									0.76		3.5
D125624		USGS		Geochemistry of rock samples from the National Geochemical Database: U.S. Geological Survey, Reston, VA.	U.S. Geological Survey	USGS		40.3667	-105.133	0.01	70	70	70	UNKNOWN	SEDIMENTARY	UNKNOWN	UNKNOWN	ARKOSE		80.1		5.08							1.4	3.8	0.52	1.63							0.26	280			7
D125625		USGS		Geochemistry of rock samples from the National Geochemical Database: U.S. Geological Survey, Reston, VA.	U.S. Geological Survey	USGS		40.3667	-105.133	0.01	70	70	70	DNAA	SEDIMENTARY	UNKNOWN	UNKNOWN	ARKOSE
D125625		USGS		Geochemistry of rock samples from the National Geochemical Database: U.S. Geological Survey, Reston, VA.	U.S. Geological Survey	USGS		40.3667	-105.133	0.01	70	70	70	ICPAES	SEDIMENTARY	UNKNOWN	UNKNOWN	ARKOSE																									0.79		3.5
D125625		USGS		Geochemistry of rock samples from the National Geochemical Database: U.S. Geological Survey, Reston, VA.	U.S. Geological Survey	USGS		40.3667	-105.133	0.01	70	70	70	UNKNOWN	SEDIMENTARY	UNKNOWN	UNKNOWN	ARKOSE		59.8		6.03							1.38	3.9	0.51	1.63							0.28	300			15
D125626		USGS		Geochemistry of rock samples from the National Geochemical Database: U.S. Geological Survey, Reston, VA.	U.S. Geological Survey	USGS		38.5	-105.25	0.01	70	70	70	DNAA	SEDIMENTARY	UNKNOWN	UNKNOWN	ARKOSE
D125626		USGS		Geochemistry of rock samples from the National Geochemical Database: U.S. Geological Survey, Reston, VA.	U.S. Geological Survey	USGS		38.5	-105.25	0.01	70	70	70	ICPAES	SEDIMENTARY	UNKNOWN	UNKNOWN	ARKOSE																									2.6	0.26	41
D125626		USGS		Geochemistry of rock samples from the National Geochemical Database: U.S. Geological Survey, Reston, VA.	U.S. Geological Survey	USGS		38.5	-105.25	0.01	70	70	70	UNKNOWN	SEDIMENTARY	UNKNOWN	UNKNOWN	ARKOSE		70.2		9.08							1.99	2.4	0.11	3.95							3.5	400	19	7	8
D125627		USGS		Geochemistry of rock samples from the National Geochemical Database: U.S. Geological Survey, Reston, VA.	U.S. Geological Survey	USGS		38.5	-104.867	0.01	70	70	70	DNAA	SEDIMENTARY	UNKNOWN	UNKNOWN	ARKOSE
D125627		USGS		Geochemistry of rock samples from the National Geochemical Database: U.S. Geological Survey, Reston, VA.	U.S. Geological Survey	USGS		38.5	-104.867	0.01	70	70	70	ICPAES	SEDIMENTARY	UNKNOWN	UNKNOWN	ARKOSE																									2.3		12
D125627		USGS		Geochemistry of rock samples from the National Geochemical Database: U.S. Geological Survey, Reston, VA.	U.S. Geological Survey	USGS		38.5	-104.867	0.01	70	70	70	UNKNOWN	SEDIMENTARY	UNKNOWN	UNKNOWN	ARKOSE		74.4		6.86							1.24	0.2	0.25	4.35							1.1	130			8
D125628		USGS		Geochemistry of rock samples from the National Geochemical Database: U.S. Geological Survey, Reston, VA.	U.S. Geological Survey	USGS		38.5	-105.25	0.01	70	70	70	DNAA	SEDIMENTARY	UNKNOWN	UNKNOWN	ARKOSE
D125628		USGS		Geochemistry of rock samples from the National Geochemical Database: U.S. Geological Survey, Reston, VA.	U.S. Geological Survey	USGS		38.5	-105.25	0.01	70	70	70	ICPAES	SEDIMENTARY	UNKNOWN	UNKNOWN	ARKOSE																									6.7	0.11	23
D125628		USGS		Geochemistry of rock samples from the National Geochemical Database: U.S. Geological Survey, Reston, VA.	U.S. Geological Survey	USGS		38.5	-105.25	0.01	70	70	70	UNKNOWN	SEDIMENTARY	UNKNOWN	UNKNOWN	ARKOSE		70.2		8.85							1.21	2.45	0.34	4.55							1.2	580	10		11
D125629		USGS		Geochemistry of rock samples from the National Geochemical Database: U.S. Geological Survey, Reston, VA.	U.S. Geological Survey	USGS		39.3667	-105	0.01	70	70	70	DNAA	SEDIMENTARY	UNKNOWN	UNKNOWN	ARKOSE
D125629		USGS		Geochemistry of rock samples from the National Geochemical Database: U.S. Geological Survey, Reston, VA.	U.S. Geological Survey	USGS		39.3667	-105	0.01	70	70	70	ICPAES	SEDIMENTARY	UNKNOWN	UNKNOWN	ARKOSE																									1.8	0.19	18
D125629		USGS		Geochemistry of rock samples from the National Geochemical Database: U.S. Geological Survey, Reston, VA.	U.S. Geological Survey	USGS		39.3667	-105	0.01	70	70	70	UNKNOWN	SEDIMENTARY	UNKNOWN	UNKNOWN	ARKOSE		78.3		8.23							0.11	0.06	0.18	4.65							0.31	500			9
D125630		USGS		Geochemistry of rock samples from the National Geochemical Database: U.S. Geological Survey, Reston, VA.	U.S. Geological Survey	USGS		40.3667	-105.133	0.01	70	70	70	DNAA	SEDIMENTARY	UNKNOWN	UNKNOWN	ARKOSE
D125630		USGS		Geochemistry of rock samples from the National Geochemical Database: U.S. Geological Survey, Reston, VA.	U.S. Geological Survey	USGS		40.3667	-105.133	0.01	70	70	70	ICPAES	SEDIMENTARY	UNKNOWN	UNKNOWN	ARKOSE																									4.7	0.14	7
D125630		USGS		Geochemistry of rock samples from the National Geochemical Database: U.S. Geological Survey, Reston, VA.	U.S. Geological Survey	USGS		40.3667	-105.133	0.01	70	70	70	UNKNOWN	SEDIMENTARY	UNKNOWN	UNKNOWN	ARKOSE		61.3		6.5							0.25	10.8	1	3.05							0.32	39			5
D125631		USGS		Geochemistry of rock samples from the National Geochemical Database: U.S. Geological Survey, Reston, VA.	U.S. Geological Survey	USGS		40.3667	-105.133	0.01	70	70	70	DNAA	SEDIMENTARY	UNKNOWN	UNKNOWN	ARKOSE
D125631		USGS		Geochemistry of rock samples from the National Geochemical Database: U.S. Geological Survey, Reston, VA.	U.S. Geological Survey	USGS		40.3667	-105.133	0.01	70	70	70	ICPAES	SEDIMENTARY	UNKNOWN	UNKNOWN	ARKOSE																									1	0.06	8.6
D125631		USGS		Geochemistry of rock samples from the National Geochemical Database: U.S. Geological Survey, Reston, VA.	U.S. Geological Survey	USGS		40.3667	-105.133	0.01	70	70	70	UNKNOWN	SEDIMENTARY	UNKNOWN	UNKNOWN	ARKOSE		68.3		5.51							1.58	4.2	0.86	2.75							0.6	360			5
D125632		USGS		Geochemistry of rock samples from the National Geochemical Database: U.S. Geological Survey, Reston, VA.	U.S. Geological Survey	USGS		40.3667	-105.133	0.01	70	70	70	DNAA	SEDIMENTARY	UNKNOWN	UNKNOWN	ARKOSE
D125632		USGS		Geochemistry of rock samples from the National Geochemical Database: U.S. Geological Survey, Reston, VA.	U.S. Geological Survey	USGS		40.3667	-105.133	0.01	70	70	70	ICPAES	SEDIMENTARY	UNKNOWN	UNKNOWN	ARKOSE																									1.2		4
D125632		USGS		Geochemistry of rock samples from the National Geochemical Database: U.S. Geological Survey, Reston, VA.	U.S. Geological Survey	USGS		40.3667	-105.133	0.01	70	70	70	UNKNOWN	SEDIMENTARY	UNKNOWN	UNKNOWN	ARKOSE		63.2		5.18							0.21	0.08	1.23	0.77							0.23	60			10
D125633		USGS		Geochemistry of rock samples from the National Geochemical Database: U.S. Geological Survey, Reston, VA.	U.S. Geological Survey	USGS		39.5	-105.133	0.01	70	70	70	DNAA	SEDIMENTARY	UNKNOWN	UNKNOWN	ARKOSE
D125633		USGS		Geochemistry of rock samples from the National Geochemical Database: U.S. Geological Survey, Reston, VA.	U.S. Geological Survey	USGS		39.5	-105.133	0.01	70	70	70	ICPAES	SEDIMENTARY	UNKNOWN	UNKNOWN	ARKOSE																									9.8	0.065	8.4
D125633		USGS		Geochemistry of rock samples from the National Geochemical Database: U.S. Geological Survey, Reston, VA.	U.S. Geological Survey	USGS		39.5	-105.133	0.01	70	70	70	UNKNOWN	SEDIMENTARY	UNKNOWN	UNKNOWN	ARKOSE		56.7		6.28							0.23	0.1	0.47	4.33							3.4	96	12		21
D125634		USGS		Geochemistry of rock samples from the National Geochemical Database: U.S. Geological Survey, Reston, VA.	U.S. Geological Survey	USGS		39.3667	-105	0.01	70	70	70	DNAA	SEDIMENTARY	UNKNOWN	UNKNOWN	ARKOSE
D125634		USGS		Geochemistry of rock samples from the National Geochemical Database: U.S. Geological Survey, Reston, VA.	U.S. Geological Survey	USGS		39.3667	-105	0.01	70	70	70	ICPAES	SEDIMENTARY	UNKNOWN	UNKNOWN	ARKOSE																									0.99		10
D125634		USGS		Geochemistry of rock samples from the National Geochemical Database: U.S. Geological Survey, Reston, VA.	U.S. Geological Survey	USGS		39.3667	-105	0.01	70	70	70	UNKNOWN	SEDIMENTARY	UNKNOWN	UNKNOWN	ARKOSE		75.1		7.86							0.17	0.06	0.15	5.1							0.36	29			4
D140122		USGS		Geochemistry of rock samples from the National Geochemical Database: U.S. Geological Survey, Reston, VA.	U.S. Geological Survey	USGS		44.25	-114.75	0.01	3	3	3	UNKNOWN	SEDIMENTARY	UNKNOWN	UNKNOWN	ARKOSE																					2	300		7	2			1500			5
D140144		USGS		Geochemistry of rock samples from the National Geochemical Database: U.S. Geological Survey, Reston, VA.	U.S. Geological Survey	USGS		44.25	-114.75	0.01	3	3	3	UNKNOWN	SEDIMENTARY	UNKNOWN	UNKNOWN	ARKOSE																					1.5	300		15	1.5						3
D179349		USGS		Geochemistry of rock samples from the National Geochemical Database: U.S. Geological Survey, Reston, VA.	U.S. Geological Survey	USGS		40.4167	-74.9833	0.01	59	59	59	UNKNOWN	SEDIMENTARY	UNKNOWN	UNKNOWN	ARKOSE
D179350		USGS		Geochemistry of rock samples from the National Geochemical Database: U.S. Geological Survey, Reston, VA.	U.S. Geological Survey	USGS		40.4167	-74.9833	0.01	59	59	59	UNKNOWN	SEDIMENTARY	UNKNOWN	UNKNOWN	ARKOSE
D179354		USGS		Geochemistry of rock samples from the National Geochemical Database: U.S. Geological Survey, Reston, VA.	U.S. Geological Survey	USGS		40.4167	-74.9833	0.01	59	59	59	UNKNOWN	SEDIMENTARY	UNKNOWN	UNKNOWN	ARKOSE
D187886		USGS		Geochemistry of rock samples from the National Geochemical Database: U.S. Geological Survey, Reston, VA.	U.S. Geological Survey	USGS		38.4833	-109.683	0.01	71	71	71	UNKNOWN	SEDIMENTARY	UNKNOWN	UNKNOWN	ARKOSE																					3	700	7	7	100						10
D187887		USGS		Geochemistry of rock samples from the National Geochemical Database: U.S. Geological Survey, Reston, VA.	U.S. Geological Survey	USGS		38.4833	-109.683	0.01	71	71	71	UNKNOWN	SEDIMENTARY	UNKNOWN	UNKNOWN	ARKOSE																					0.3	70			150				1.5		10
D187888		USGS		Geochemistry of rock samples from the National Geochemical Database: U.S. Geological Survey, Reston, VA.	U.S. Geological Survey	USGS		38.4833	-109.683	0.01	71	71	71	UNKNOWN	SEDIMENTARY	UNKNOWN	UNKNOWN	ARKOSE																					0.5	500			70000				30		10
D187896		USGS		Geochemistry of rock samples from the National Geochemical Database: U.S. Geological Survey, Reston, VA.	U.S. Geological Survey	USGS		38.1833	-109.233	0.01	71	71	71	UNKNOWN	SEDIMENTARY	UNKNOWN	UNKNOWN	ARKOSE																					3	300	5	10	70
D187897		USGS		Geochemistry of rock samples from the National Geochemical Database: U.S. Geological Survey, Reston, VA.	U.S. Geological Survey	USGS		38.1833	-109.233	0.01	71	71	71	UNKNOWN	SEDIMENTARY	UNKNOWN	UNKNOWN	ARKOSE																					1	150	7	5	15
D187898		USGS		Geochemistry of rock samples from the National Geochemical Database: U.S. Geological Survey, Reston, VA.	U.S. Geological Survey	USGS		38.1833	-109.233	0.01	71	71	71	UNKNOWN	SEDIMENTARY	UNKNOWN	UNKNOWN	ARKOSE																					0.7	150	7	5	10
D187899		USGS		Geochemistry of rock samples from the National Geochemical Database: U.S. Geological Survey, Reston, VA.	U.S. Geological Survey	USGS		38.1833	-109.233	0.01	71	71	71	UNKNOWN	SEDIMENTARY	UNKNOWN	UNKNOWN	ARKOSE																					1.5	500	10	7	10
D187902		USGS		Geochemistry of rock samples from the National Geochemical Database: U.S. Geological Survey, Reston, VA.	U.S. Geological Survey	USGS		38.2	-109.25	0.01	71	71	71	UNKNOWN	SEDIMENTARY	UNKNOWN	UNKNOWN	ARKOSE																					3	300	15	7	10
D187903		USGS		Geochemistry of rock samples from the National Geochemical Database: U.S. Geological Survey, Reston, VA.	U.S. Geological Survey	USGS		38.2	-109.25	0.01	71	71	71	UNKNOWN	SEDIMENTARY	UNKNOWN	UNKNOWN	ARKOSE																					1.5	300	10	5	5
D187904		USGS		Geochemistry of rock samples from the National Geochemical Database: U.S. Geological Survey, Reston, VA.	U.S. Geological Survey	USGS		38.2	-109.25	0.01	71	71	71	UNKNOWN	SEDIMENTARY	UNKNOWN	UNKNOWN	ARKOSE																					5	150	15	7	7
D187905		USGS		Geochemistry of rock samples from the National Geochemical Database: U.S. Geological Survey, Reston, VA.	U.S. Geological Survey	USGS		38.2	-109.25	0.01	71	71	71	UNKNOWN	SEDIMENTARY	UNKNOWN	UNKNOWN	ARKOSE																					3	700	20		500
D187906		USGS		Geochemistry of rock samples from the National Geochemical Database: U.S. Geological Survey, Reston, VA.	U.S. Geological Survey	USGS		38.2	-109.25	0.01	71	71	71	UNKNOWN	SEDIMENTARY	UNKNOWN	UNKNOWN	ARKOSE																					1.5	1500	7		30
D187909		USGS		Geochemistry of rock samples from the National Geochemical Database: U.S. Geological Survey, Reston, VA.	U.S. Geological Survey	USGS		38.1667	-109.233	0.01	71	71	71	UNKNOWN	SEDIMENTARY	UNKNOWN	UNKNOWN	ARKOSE																					7	70	5		7
D187910		USGS		Geochemistry of rock samples from the National Geochemical Database: U.S. Geological Survey, Reston, VA.	U.S. Geological Survey	USGS		38.1667	-109.233	0.01	71	71	71	UNKNOWN	SEDIMENTARY	UNKNOWN	UNKNOWN	ARKOSE																					2	100	5		7
D187911		USGS		Geochemistry of rock samples from the National Geochemical Database: U.S. Geological Survey, Reston, VA.	U.S. Geological Survey	USGS		38.1667	-109.233	0.01	71	71	71	UNKNOWN	SEDIMENTARY	UNKNOWN	UNKNOWN	ARKOSE																					0.7	70			7						10
D187912		USGS		Geochemistry of rock samples from the National Geochemical Database: U.S. Geological Survey, Reston, VA.	U.S. Geological Survey	USGS		38.1667	-109.233	0.01	71	71	71	UNKNOWN	SEDIMENTARY	UNKNOWN	UNKNOWN	ARKOSE																					1	70		5	5						10
D187913		USGS		Geochemistry of rock samples from the National Geochemical Database: U.S. Geological Survey, Reston, VA.	U.S. Geological Survey	USGS		38.1667	-109.233	0.01	71	71	71	UNKNOWN	SEDIMENTARY	UNKNOWN	UNKNOWN	ARKOSE																					2	70	5		3
D187914		USGS		Geochemistry of rock samples from the National Geochemical Database: U.S. Geological Survey, Reston, VA.	U.S. Geological Survey	USGS		38.1667	-109.233	0.01	71	71	71	UNKNOWN	SEDIMENTARY	UNKNOWN	UNKNOWN	ARKOSE																					1	150	10	7	30
D187915		USGS		Geochemistry of rock samples from the National Geochemical Database: U.S. Geological Survey, Reston, VA.	U.S. Geological Survey	USGS		38.1667	-109.233	0.01	71	71	71	UNKNOWN	SEDIMENTARY	UNKNOWN	UNKNOWN	ARKOSE																					1.5	70	5		30
D187916		USGS		Geochemistry of rock samples from the National Geochemical Database: U.S. Geological Survey, Reston, VA.	U.S. Geological Survey	USGS		38.1667	-109.233	0.01	71	71	71	UNKNOWN	SEDIMENTARY	UNKNOWN	UNKNOWN	ARKOSE																					1	100	7		15						10
D187917		USGS		Geochemistry of rock samples from the National Geochemical Database: U.S. Geological Survey, Reston, VA.	U.S. Geological Survey	USGS		38.1667	-109.233	0.01	71	71	71	UNKNOWN	SEDIMENTARY	UNKNOWN	UNKNOWN	ARKOSE																					1.5	150	10	5	30
D187918		USGS		Geochemistry of rock samples from the National Geochemical Database: U.S. Geological Survey, Reston, VA.	U.S. Geological Survey	USGS		38.1667	-109.233	0.01	71	71	71	UNKNOWN	SEDIMENTARY	UNKNOWN	UNKNOWN	ARKOSE																					1.5	100	5		3						10
D201811		USGS		Geochemistry of rock samples from the National Geochemical Database: U.S. Geological Survey, Reston, VA.	U.S. Geological Survey	USGS		36.99	-91.3239	0.01	67	67	67	UNKNOWN	SEDIMENTARY	UNKNOWN	UNKNOWN	ARKOSE
D201812		USGS		Geochemistry of rock samples from the National Geochemical Database: U.S. Geological Survey, Reston, VA.	U.S. Geological Survey	USGS		36.99	-91.3239	0.01	67	67	67	UNKNOWN	SEDIMENTARY	UNKNOWN	UNKNOWN	ARKOSE
D201813		USGS		Geochemistry of rock samples from the National Geochemical Database: U.S. Geological Survey, Reston, VA.	U.S. Geological Survey	USGS		36.99	-91.3239	0.01	67	67	67	UNKNOWN	SEDIMENTARY	UNKNOWN	UNKNOWN	ARKOSE
D201814		USGS		Geochemistry of rock samples from the National Geochemical Database: U.S. Geological Survey, Reston, VA.	U.S. Geological Survey	USGS		36.99	-91.3239	0.01	67	67	67	UNKNOWN	SEDIMENTARY	UNKNOWN	UNKNOWN	ARKOSE
D201866		USGS		Geochemistry of rock samples from the National Geochemical Database: U.S. Geological Survey, Reston, VA.	U.S. Geological Survey	USGS		37.1542	-91.09	0.01	67	67	67	UNKNOWN	SEDIMENTARY	UNKNOWN	UNKNOWN	ARKOSE
D201914		USGS		Geochemistry of rock samples from the National Geochemical Database: U.S. Geological Survey, Reston, VA.	U.S. Geological Survey	USGS		36.9828	-90.7178	0.01	67	67	67	UNKNOWN	SEDIMENTARY	UNKNOWN	UNKNOWN	ARKOSE
D201919		USGS		Geochemistry of rock samples from the National Geochemical Database: U.S. Geological Survey, Reston, VA.	U.S. Geological Survey	USGS		37.1031	-90.4108	0.01	67	67	67	UNKNOWN	SEDIMENTARY	UNKNOWN	UNKNOWN	ARKOSE
D201920		USGS		Geochemistry of rock samples from the National Geochemical Database: U.S. Geological Survey, Reston, VA.	U.S. Geological Survey	USGS		37.1031	-90.4108	0.01	67	67	67	UNKNOWN	SEDIMENTARY	UNKNOWN	UNKNOWN	ARKOSE
D201930		USGS		Geochemistry of rock samples from the National Geochemical Database: U.S. Geological Survey, Reston, VA.	U.S. Geological Survey	USGS		37.9669	-90.6944	0.01	67	67	67	UNKNOWN	SEDIMENTARY	UNKNOWN	UNKNOWN	ARKOSE
D201942		USGS		Geochemistry of rock samples from the National Geochemical Database: U.S. Geological Survey, Reston, VA.	U.S. Geological Survey	USGS		37.8281	-90.6997	0.01	67	67	67	UNKNOWN	SEDIMENTARY	UNKNOWN	UNKNOWN	ARKOSE
D201963		USGS		Geochemistry of rock samples from the National Geochemical Database: U.S. Geological Survey, Reston, VA.	U.S. Geological Survey	USGS		39.9678	-90.5406	0.01	67	67	67	UNKNOWN	SEDIMENTARY	UNKNOWN	UNKNOWN	ARKOSE
D201977		USGS		Geochemistry of rock samples from the National Geochemical Database: U.S. Geological Survey, Reston, VA.	U.S. Geological Survey	USGS		37.1267	-90.8556	0.01				UNKNOWN	SEDIMENTARY	UNKNOWN	UNKNOWN	ARKOSE
D201983		USGS		Geochemistry of rock samples from the National Geochemical Database: U.S. Geological Survey, Reston, VA.	U.S. Geological Survey	USGS		37.2097	-90.3414	0.01	67	67	67	UNKNOWN	SEDIMENTARY	UNKNOWN	UNKNOWN	ARKOSE
D201986		USGS		Geochemistry of rock samples from the National Geochemical Database: U.S. Geological Survey, Reston, VA.	U.S. Geological Survey	USGS		37.1139	-90.305	0.01	67	67	67	UNKNOWN	SEDIMENTARY	UNKNOWN	UNKNOWN	ARKOSE
D207728		USGS		Geochemistry of rock samples from the National Geochemical Database: U.S. Geological Survey, Reston, VA.	U.S. Geological Survey	USGS		38.45	-109.717	0.01	71	71	71	UNKNOWN	SEDIMENTARY	UNKNOWN	UNKNOWN	ARKOSE																				34	1.7	570	15	9.1	9		56				4.8
D207729		USGS		Geochemistry of rock samples from the National Geochemical Database: U.S. Geological Survey, Reston, VA.	U.S. Geological Survey	USGS		38.45	-109.717	0.01	71	71	71	UNKNOWN	SEDIMENTARY	UNKNOWN	UNKNOWN	ARKOSE																				39	2	380	18	6.4	11						7.4
D207730		USGS		Geochemistry of rock samples from the National Geochemical Database: U.S. Geological Survey, Reston, VA.	U.S. Geological Survey	USGS		38.45	-109.367	0.01	71	71	71	UNKNOWN	SEDIMENTARY	UNKNOWN	UNKNOWN	ARKOSE																				32	0.79	590	7.7	3.6	8.6						5.2
D207731		USGS		Geochemistry of rock samples from the National Geochemical Database: U.S. Geological Survey, Reston, VA.	U.S. Geological Survey	USGS		38.45	-109.367	0.01	71	71	71	UNKNOWN	SEDIMENTARY	UNKNOWN	UNKNOWN	ARKOSE																				35	2.6	330	21	7.3	9.8						6.8
D207732		USGS		Geochemistry of rock samples from the National Geochemical Database: U.S. Geological Survey, Reston, VA.	U.S. Geological Survey	USGS		38.6333	-109.367	0.01	71	71	71	UNKNOWN	SEDIMENTARY	UNKNOWN	UNKNOWN	ARKOSE																				34	2.8	430	18	12	21						6.9
D207733		USGS		Geochemistry of rock samples from the National Geochemical Database: U.S. Geological Survey, Reston, VA.	U.S. Geological Survey	USGS		38.6333	-109.367	0.01	71	71	71	UNKNOWN	SEDIMENTARY	UNKNOWN	UNKNOWN	ARKOSE																				30	1.8	940	18	11	8.4						5.2
D207734		USGS		Geochemistry of rock samples from the National Geochemical Database: U.S. Geological Survey, Reston, VA.	U.S. Geological Survey	USGS		38.6333	-109.417	0.01	71	71	71	UNKNOWN	SEDIMENTARY	UNKNOWN	UNKNOWN	ARKOSE																				35	0.59	1200	11	7.7	6.4						4
D207735		USGS		Geochemistry of rock samples from the National Geochemical Database: U.S. Geological Survey, Reston, VA.	U.S. Geological Survey	USGS		38.6333	-109.417	0.01	71	71	71	UNKNOWN	SEDIMENTARY	UNKNOWN	UNKNOWN	ARKOSE																				35	0.88	970	16	7	6.6				2.7		5
D207736		USGS		Geochemistry of rock samples from the National Geochemical Database: U.S. Geological Survey, Reston, VA.	U.S. Geological Survey	USGS		38.7	-109.267	0.01	71	71	71	UNKNOWN	SEDIMENTARY	UNKNOWN	UNKNOWN	ARKOSE																				37	2.3	750	14	7	13						6.3
D207737		USGS		Geochemistry of rock samples from the National Geochemical Database: U.S. Geological Survey, Reston, VA.	U.S. Geological Survey	USGS		38.7	-109.267	0.01	71	71	71	UNKNOWN	SEDIMENTARY	UNKNOWN	UNKNOWN	ARKOSE																				37	1.6	280	12	6.3	11		63				5.8
D207738		USGS		Geochemistry of rock samples from the National Geochemical Database: U.S. Geological Survey, Reston, VA.	U.S. Geological Survey	USGS		38.7167	-109.3	0.01	71	71	71	UNKNOWN	SEDIMENTARY	UNKNOWN	UNKNOWN	ARKOSE																				35	1.5	1300	13	5.5	9.5						4.9
D207739		USGS		Geochemistry of rock samples from the National Geochemical Database: U.S. Geological Survey, Reston, VA.	U.S. Geological Survey	USGS		38.7167	-109.3	0.01	71	71	71	UNKNOWN	SEDIMENTARY	UNKNOWN	UNKNOWN	ARKOSE																				38	2.5	330	20	7.3	18				2.2		5.7
D207740		USGS		Geochemistry of rock samples from the National Geochemical Database: U.S. Geological Survey, Reston, VA.	U.S. Geological Survey	USGS		38.15	-109.183	0.01	71	71	71	UNKNOWN	SEDIMENTARY	UNKNOWN	UNKNOWN	ARKOSE																				36	0.53	760	8.7	4.3	72						5.4
D207741		USGS		Geochemistry of rock samples from the National Geochemical Database: U.S. Geological Survey, Reston, VA.	U.S. Geological Survey	USGS		38.15	-109.183	0.01	71	71	71	UNKNOWN	SEDIMENTARY	UNKNOWN	UNKNOWN	ARKOSE																				36	0.59	340	9.8	4.3	18						6.5
D207742		USGS		Geochemistry of rock samples from the National Geochemical Database: U.S. Geological Survey, Reston, VA.	U.S. Geological Survey	USGS		38.15	-109.167	0.01	71	71	71	UNKNOWN	SEDIMENTARY	UNKNOWN	UNKNOWN	ARKOSE																					0.83		18	3	34				2.7		5.9
D207743		USGS		Geochemistry of rock samples from the National Geochemical Database: U.S. Geological Survey, Reston, VA.	U.S. Geological Survey	USGS		38.15	-109.167	0.01	71	71	71	UNKNOWN	SEDIMENTARY	UNKNOWN	UNKNOWN	ARKOSE																				33	0.55	390	8.1	3	43						4.6
D207744		USGS		Geochemistry of rock samples from the National Geochemical Database: U.S. Geological Survey, Reston, VA.	U.S. Geological Survey	USGS		38.1833	-109.233	0.01	71	71	71	UNKNOWN	SEDIMENTARY	UNKNOWN	UNKNOWN	ARKOSE																					2		14	4.1	13						6.2
D207745		USGS		Geochemistry of rock samples from the National Geochemical Database: U.S. Geological Survey, Reston, VA.	U.S. Geological Survey	USGS		38.1833	-109.183	0.01	71	71	71	UNKNOWN	SEDIMENTARY	UNKNOWN	UNKNOWN	ARKOSE																				21	1.3	460	14	6.2	7.2						4.1
D207746		USGS		Geochemistry of rock samples from the National Geochemical Database: U.S. Geological Survey, Reston, VA.	U.S. Geological Survey	USGS		38.6	-109.617	0.01	71	71	71	UNKNOWN	SEDIMENTARY	UNKNOWN	UNKNOWN	ARKOSE																				38	3	320	25	10	10		53				6.9
D207747		USGS		Geochemistry of rock samples from the National Geochemical Database: U.S. Geological Survey, Reston, VA.	U.S. Geological Survey	USGS		38.6	-109.617	0.01	71	71	71	UNKNOWN	SEDIMENTARY	UNKNOWN	UNKNOWN	ARKOSE																				29	3	1000	26	14	19						5.3
D207748		USGS		Geochemistry of rock samples from the National Geochemical Database: U.S. Geological Survey, Reston, VA.	U.S. Geological Survey	USGS		38.6167	-109.633	0.01	71	71	71	UNKNOWN	SEDIMENTARY	UNKNOWN	UNKNOWN	ARKOSE																				30	1.2	1000	12	5.4	5.8						5.6
D207749		USGS		Geochemistry of rock samples from the National Geochemical Database: U.S. Geological Survey, Reston, VA.	U.S. Geological Survey	USGS		38.6167	-109.633	0.01	71	71	71	UNKNOWN	SEDIMENTARY	UNKNOWN	UNKNOWN	ARKOSE																				36	1.3	370	11	3.7	12						5.6
D207750		USGS		Geochemistry of rock samples from the National Geochemical Database: U.S. Geological Survey, Reston, VA.	U.S. Geological Survey	USGS		38.4833	-109.617	0.01	71	71	71	UNKNOWN	SEDIMENTARY	UNKNOWN	UNKNOWN	ARKOSE																				34	2.1	500	17	8.6	8.6						5.7
D207751		USGS		Geochemistry of rock samples from the National Geochemical Database: U.S. Geological Survey, Reston, VA.	U.S. Geological Survey	USGS		38.4833	-109.667	0.01	71	71	71	UNKNOWN	SEDIMENTARY	UNKNOWN	UNKNOWN	ARKOSE																				37	2.2	470	16	8	7.3						6.4
D207752		USGS		Geochemistry of rock samples from the National Geochemical Database: U.S. Geological Survey, Reston, VA.	U.S. Geological Survey	USGS		38.5	-109.65	0.01	71	71	71	UNKNOWN	SEDIMENTARY	UNKNOWN	UNKNOWN	ARKOSE																				40	1.4	530	12	5.4	6.4						6.5
D208538		USGS		Geochemistry of rock samples from the National Geochemical Database: U.S. Geological Survey, Reston, VA.	U.S. Geological Survey	USGS		38.7	-108.933	0.01	71	71	71	UNKNOWN	SEDIMENTARY	UNKNOWN	UNKNOWN	ARKOSE																				32	2.4	450	12	5.8	16	2					7.7
D208539		USGS		Geochemistry of rock samples from the National Geochemical Database: U.S. Geological Survey, Reston, VA.	U.S. Geological Survey	USGS		38.7	-108.933	0.01	71	71	71	UNKNOWN	SEDIMENTARY	UNKNOWN	UNKNOWN	ARKOSE																				28	3.4	530	17	9.6	15						7.6
D208540		USGS		Geochemistry of rock samples from the National Geochemical Database: U.S. Geological Survey, Reston, VA.	U.S. Geological Survey	USGS		38	-108.65	0.01	71	71	71	UNKNOWN	SEDIMENTARY	UNKNOWN	UNKNOWN	ARKOSE																				30	0.12	990	5.8	1.4	25						4.4
D208541		USGS		Geochemistry of rock samples from the National Geochemical Database: U.S. Geological Survey, Reston, VA.	U.S. Geological Survey	USGS		38	-108.65	0.01	71	71	71	UNKNOWN	SEDIMENTARY	UNKNOWN	UNKNOWN	ARKOSE																				34	0.93		13	4.6	14		63				5.7
D208542		USGS		Geochemistry of rock samples from the National Geochemical Database: U.S. Geological Survey, Reston, VA.	U.S. Geological Survey	USGS		38.65	-108.967	0.01	71	71	71	UNKNOWN	SEDIMENTARY	UNKNOWN	UNKNOWN	ARKOSE																				34	1.4	360	16	6.4	24	2.2					4.1
D208543		USGS		Geochemistry of rock samples from the National Geochemical Database: U.S. Geological Survey, Reston, VA.	U.S. Geological Survey	USGS		38.65	-108.967	0.01	71	71	71	UNKNOWN	SEDIMENTARY	UNKNOWN	UNKNOWN	ARKOSE																				25	1.5	260	8.9	4.6	5.2						6.6
D208544		USGS		Geochemistry of rock samples from the National Geochemical Database: U.S. Geological Survey, Reston, VA.	U.S. Geological Survey	USGS		38.0167	-108.083	0.01	71	71	71	UNKNOWN	SEDIMENTARY	UNKNOWN	UNKNOWN	ARKOSE																				22	3.5	790	16	12	52						6.1
D208545		USGS		Geochemistry of rock samples from the National Geochemical Database: U.S. Geological Survey, Reston, VA.	U.S. Geological Survey	USGS		38.0167	-108.083	0.01	71	71	71	UNKNOWN	SEDIMENTARY	UNKNOWN	UNKNOWN	ARKOSE																				31	0.85	430	12	5.6	15						6.2
D208546		USGS		Geochemistry of rock samples from the National Geochemical Database: U.S. Geological Survey, Reston, VA.	U.S. Geological Survey	USGS		38.7	-108.883	0.01	71	71	71	UNKNOWN	SEDIMENTARY	UNKNOWN	UNKNOWN	ARKOSE																				33	1.7	500	12	9.2	11	2.6					7.1
D208547		USGS		Geochemistry of rock samples from the National Geochemical Database: U.S. Geological Survey, Reston, VA.	U.S. Geological Survey	USGS		38.7	-108.883	0.01	71	71	71	UNKNOWN	SEDIMENTARY	UNKNOWN	UNKNOWN	ARKOSE																				29	3.2	700	10	11	19		63				8.7
D208549		USGS		Geochemistry of rock samples from the National Geochemical Database: U.S. Geological Survey, Reston, VA.	U.S. Geological Survey	USGS		38.5167	-108.967	0.01	71	71	71	UNKNOWN	SEDIMENTARY	UNKNOWN	UNKNOWN	ARKOSE																				27	0.77	840	9.3	4.8	3.2						4.7
D208550		USGS		Geochemistry of rock samples from the National Geochemical Database: U.S. Geological Survey, Reston, VA.	U.S. Geological Survey	USGS		38.5167	-108.967	0.01	71	71	71	UNKNOWN	SEDIMENTARY	UNKNOWN	UNKNOWN	ARKOSE																				25	0.89	450	12	4.8	7.2						5.3
D208551		USGS		Geochemistry of rock samples from the National Geochemical Database: U.S. Geological Survey, Reston, VA.	U.S. Geological Survey	USGS		38.75	-109.05	0.01	71	71	71	UNKNOWN	SEDIMENTARY	UNKNOWN	UNKNOWN	ARKOSE																				25	2.8	540	15	8	16						5.7
D208552		USGS		Geochemistry of rock samples from the National Geochemical Database: U.S. Geological Survey, Reston, VA.	U.S. Geological Survey	USGS		38.75	-109.05	0.01	71	71	71	UNKNOWN	SEDIMENTARY	UNKNOWN	UNKNOWN	ARKOSE																				25	2	440	16	7.5	16						5
D208553		USGS		Geochemistry of rock samples from the National Geochemical Database: U.S. Geological Survey, Reston, VA.	U.S. Geological Survey	USGS		38.65	-108.95	0.01	71	71	71	UNKNOWN	SEDIMENTARY	UNKNOWN	UNKNOWN	ARKOSE																				29	1.7	260	9.1	3.9	13						7.1
D208554		USGS		Geochemistry of rock samples from the National Geochemical Database: U.S. Geological Survey, Reston, VA.	U.S. Geological Survey	USGS		38.65	-108.95	0.01	71	71	71	UNKNOWN	SEDIMENTARY	UNKNOWN	UNKNOWN	ARKOSE																				30	2	280	10	5.3	7.7						6.7
D208556		USGS		Geochemistry of rock samples from the National Geochemical Database: U.S. Geological Survey, Reston, VA.	U.S. Geological Survey	USGS		38.65	-108.917	0.01	71	71	71	UNKNOWN	SEDIMENTARY	UNKNOWN	UNKNOWN	ARKOSE																				32	4.3	760	7.4	8	16	2.9					8.1
D208557		USGS		Geochemistry of rock samples from the National Geochemical Database: U.S. Geological Survey, Reston, VA.	U.S. Geological Survey	USGS		38.3333	-108.833	0.01	71	71	71	UNKNOWN	SEDIMENTARY	UNKNOWN	UNKNOWN	ARKOSE																				26	1.7	450	21	6.5	6						5.8
D208558		USGS		Geochemistry of rock samples from the National Geochemical Database: U.S. Geological Survey, Reston, VA.	U.S. Geological Survey	USGS		38.3333	-108.833	0.01	71	71	71	UNKNOWN	SEDIMENTARY	UNKNOWN	UNKNOWN	ARKOSE																				28	0.75	340	14	7.2	9.2						5.4
D208562		USGS		Geochemistry of rock samples from the National Geochemical Database: U.S. Geological Survey, Reston, VA.	U.S. Geological Survey	USGS		38.3333	-108.833	0.01	71	71	71	UNKNOWN	SEDIMENTARY	UNKNOWN	UNKNOWN	ARKOSE																				26	0.77	330	14	6.9	10						5.5
D210842		USGS		Geochemistry of rock samples from the National Geochemical Database: U.S. Geological Survey, Reston, VA.	U.S. Geological Survey	USGS		46.8872	-88.0417	0.01	72	72	72	UNKNOWN	SEDIMENTARY	UNKNOWN	UNKNOWN	ARKOSE																					1.6	320	12	5.5	17						5.5
D218645		USGS		Geochemistry of rock samples from the National Geochemical Database: U.S. Geological Survey, Reston, VA.	U.S. Geological Survey	USGS		36.0625	-106.688	0.01	71	71	71	UNKNOWN	SEDIMENTARY	UNKNOWN	UNKNOWN	ARKOSE																				39	0.64	320	13	6.8			70		4.1		6
D218646		USGS		Geochemistry of rock samples from the National Geochemical Database: U.S. Geological Survey, Reston, VA.	U.S. Geological Survey	USGS		36.2006	-106.89	0.01	71	71	71	UNKNOWN	SEDIMENTARY	UNKNOWN	UNKNOWN	ARKOSE																				20	0.14	1900	11	8.2	110						3.2
D218648		USGS		Geochemistry of rock samples from the National Geochemical Database: U.S. Geological Survey, Reston, VA.	U.S. Geological Survey	USGS		36.0625	-106.688	0.01	71	71	71	UNKNOWN	SEDIMENTARY	UNKNOWN	UNKNOWN	ARKOSE																					1.8	290	10	16	1600		78		10		6.2
D230896		USGS		Geochemistry of rock samples from the National Geochemical Database: U.S. Geological Survey, Reston, VA.	U.S. Geological Survey	USGS		35.5	-108.25	0.01	56	56	56	DNAA	SEDIMENTARY	UNKNOWN	UNKNOWN	ARKOSE
D230896		USGS		Geochemistry of rock samples from the National Geochemical Database: U.S. Geological Survey, Reston, VA.	U.S. Geological Survey	USGS		35.5	-108.25	0.01	56	56	56	ES	SEDIMENTARY	UNKNOWN	UNKNOWN	ARKOSE																					0.5	30			2						7
D230897		USGS		Geochemistry of rock samples from the National Geochemical Database: U.S. Geological Survey, Reston, VA.	U.S. Geological Survey	USGS		35.5	-108.25	0.01	56	56	56	DNAA	SEDIMENTARY	UNKNOWN	UNKNOWN	ARKOSE
D230897		USGS		Geochemistry of rock samples from the National Geochemical Database: U.S. Geological Survey, Reston, VA.	U.S. Geological Survey	USGS		35.5	-108.25	0.01	56	56	56	ES	SEDIMENTARY	UNKNOWN	UNKNOWN	ARKOSE																					0.5	20			3						5
D230898		USGS		Geochemistry of rock samples from the National Geochemical Database: U.S. Geological Survey, Reston, VA.	U.S. Geological Survey	USGS		35.5	-108.25	0.01	56	56	56	DNAA	SEDIMENTARY	UNKNOWN	UNKNOWN	ARKOSE
D230898		USGS		Geochemistry of rock samples from the National Geochemical Database: U.S. Geological Survey, Reston, VA.	U.S. Geological Survey	USGS		35.5	-108.25	0.01	56	56	56	ES	SEDIMENTARY	UNKNOWN	UNKNOWN	ARKOSE																					1	50		10	3						7
D230903		USGS		Geochemistry of rock samples from the National Geochemical Database: U.S. Geological Survey, Reston, VA.	U.S. Geological Survey	USGS		35.5	-108.25	0.01	56	56	56	DNAA	SEDIMENTARY	UNKNOWN	UNKNOWN	ARKOSE
D230903		USGS		Geochemistry of rock samples from the National Geochemical Database: U.S. Geological Survey, Reston, VA.	U.S. Geological Survey	USGS		35.5	-108.25	0.01	56	56	56	ES	SEDIMENTARY	UNKNOWN	UNKNOWN	ARKOSE																					3	70	5		10						7
D230905		USGS		Geochemistry of rock samples from the National Geochemical Database: U.S. Geological Survey, Reston, VA.	U.S. Geological Survey	USGS		35.5	-108.25	0.01	56	56	56	DNAA	SEDIMENTARY	UNKNOWN	UNKNOWN	ARKOSE
D230905		USGS		Geochemistry of rock samples from the National Geochemical Database: U.S. Geological Survey, Reston, VA.	U.S. Geological Survey	USGS		35.5	-108.25	0.01	56	56	56	ES	SEDIMENTARY	UNKNOWN	UNKNOWN	ARKOSE																					1.5	50			5						7
D230906		USGS		Geochemistry of rock samples from the National Geochemical Database: U.S. Geological Survey, Reston, VA.	U.S. Geological Survey	USGS		35.5	-108.25	0.01	56	56	56	DNAA	SEDIMENTARY	UNKNOWN	UNKNOWN	ARKOSE
D230906		USGS		Geochemistry of rock samples from the National Geochemical Database: U.S. Geological Survey, Reston, VA.	U.S. Geological Survey	USGS		35.5	-108.25	0.01	56	56	56	ES	SEDIMENTARY	UNKNOWN	UNKNOWN	ARKOSE																					1.5	50			3						7
D230907		USGS		Geochemistry of rock samples from the National Geochemical Database: U.S. Geological Survey, Reston, VA.	U.S. Geological Survey	USGS		35.5	-108.25	0.01	56	56	56	DNAA	SEDIMENTARY	UNKNOWN	UNKNOWN	ARKOSE
D230907		USGS		Geochemistry of rock samples from the National Geochemical Database: U.S. Geological Survey, Reston, VA.	U.S. Geological Survey	USGS		35.5	-108.25	0.01	56	56	56	ES	SEDIMENTARY	UNKNOWN	UNKNOWN	ARKOSE																					0.5	20			3						5
D230908		USGS		Geochemistry of rock samples from the National Geochemical Database: U.S. Geological Survey, Reston, VA.	U.S. Geological Survey	USGS		35.5	-108.25	0.01	56	56	56	DNAA	SEDIMENTARY	UNKNOWN	UNKNOWN	ARKOSE
D230908		USGS		Geochemistry of rock samples from the National Geochemical Database: U.S. Geological Survey, Reston, VA.	U.S. Geological Survey	USGS		35.5	-108.25	0.01	56	56	56	ES	SEDIMENTARY	UNKNOWN	UNKNOWN	ARKOSE																					0.5	20			3						5
D230909		USGS		Geochemistry of rock samples from the National Geochemical Database: U.S. Geological Survey, Reston, VA.	U.S. Geological Survey	USGS		35.5	-108.25	0.01	56	56	56	DNAA	SEDIMENTARY	UNKNOWN	UNKNOWN	ARKOSE
D230909		USGS		Geochemistry of rock samples from the National Geochemical Database: U.S. Geological Survey, Reston, VA.	U.S. Geological Survey	USGS		35.5	-108.25	0.01	56	56	56	ES	SEDIMENTARY	UNKNOWN	UNKNOWN	ARKOSE																					3	100	7	7	10						7
D230910		USGS		Geochemistry of rock samples from the National Geochemical Database: U.S. Geological Survey, Reston, VA.	U.S. Geological Survey	USGS		35.5	-108.25	0.01	56	56	56	DNAA	SEDIMENTARY	UNKNOWN	UNKNOWN	ARKOSE
D230910		USGS		Geochemistry of rock samples from the National Geochemical Database: U.S. Geological Survey, Reston, VA.	U.S. Geological Survey	USGS		35.5	-108.25	0.01	56	56	56	ES	SEDIMENTARY	UNKNOWN	UNKNOWN	ARKOSE																					0.7	20			3						7
D230911		USGS		Geochemistry of rock samples from the National Geochemical Database: U.S. Geological Survey, Reston, VA.	U.S. Geological Survey	USGS		35.5	-108.25	0.01	56	56	56	DNAA	SEDIMENTARY	UNKNOWN	UNKNOWN	ARKOSE
D230911		USGS		Geochemistry of rock samples from the National Geochemical Database: U.S. Geological Survey, Reston, VA.	U.S. Geological Survey	USGS		35.5	-108.25	0.01	56	56	56	ES	SEDIMENTARY	UNKNOWN	UNKNOWN	ARKOSE																					1.5	100			3						5
D230912		USGS		Geochemistry of rock samples from the National Geochemical Database: U.S. Geological Survey, Reston, VA.	U.S. Geological Survey	USGS		35.5	-108.25	0.01	56	56	56	DNAA	SEDIMENTARY	UNKNOWN	UNKNOWN	ARKOSE
D230912		USGS		Geochemistry of rock samples from the National Geochemical Database: U.S. Geological Survey, Reston, VA.	U.S. Geological Survey	USGS		35.5	-108.25	0.01	56	56	56	ES	SEDIMENTARY	UNKNOWN	UNKNOWN	ARKOSE																					2	70	10	30	5						5
D230914		USGS		Geochemistry of rock samples from the National Geochemical Database: U.S. Geological Survey, Reston, VA.	U.S. Geological Survey	USGS		35.5	-108.25	0.01	56	56	56	DNAA	SEDIMENTARY	UNKNOWN	UNKNOWN	ARKOSE
D230914		USGS		Geochemistry of rock samples from the National Geochemical Database: U.S. Geological Survey, Reston, VA.	U.S. Geological Survey	USGS		35.5	-108.25	0.01	56	56	56	ES	SEDIMENTARY	UNKNOWN	UNKNOWN	ARKOSE																					1	30	5	10	7		1000				7
D230915		USGS		Geochemistry of rock samples from the National Geochemical Database: U.S. Geological Survey, Reston, VA.	U.S. Geological Survey	USGS		35.5	-108.25	0.01	56	56	56	DNAA	SEDIMENTARY	UNKNOWN	UNKNOWN	ARKOSE
D230915		USGS		Geochemistry of rock samples from the National Geochemical Database: U.S. Geological Survey, Reston, VA.	U.S. Geological Survey	USGS		35.5	-108.25	0.01	56	56	56	ES	SEDIMENTARY	UNKNOWN	UNKNOWN	ARKOSE																					3	100			3						5
D230916		USGS		Geochemistry of rock samples from the National Geochemical Database: U.S. Geological Survey, Reston, VA.	U.S. Geological Survey	USGS		35.5	-108.25	0.01	56	56	56	DNAA	SEDIMENTARY	UNKNOWN	UNKNOWN	ARKOSE
D230916		USGS		Geochemistry of rock samples from the National Geochemical Database: U.S. Geological Survey, Reston, VA.	U.S. Geological Survey	USGS		35.5	-108.25	0.01	56	56	56	ES	SEDIMENTARY	UNKNOWN	UNKNOWN	ARKOSE																					0.3	20		5	20		300				3
D230918		USGS		Geochemistry of rock samples from the National Geochemical Database: U.S. Geological Survey, Reston, VA.	U.S. Geological Survey	USGS		35.5	-108.25	0.01	56	56	56	DNAA	SEDIMENTARY	UNKNOWN	UNKNOWN	ARKOSE
D230918		USGS		Geochemistry of rock samples from the National Geochemical Database: U.S. Geological Survey, Reston, VA.	U.S. Geological Survey	USGS		35.5	-108.25	0.01	56	56	56	ES	SEDIMENTARY	UNKNOWN	UNKNOWN	ARKOSE																					0.7	30			5						3
D230919		USGS		Geochemistry of rock samples from the National Geochemical Database: U.S. Geological Survey, Reston, VA.	U.S. Geological Survey	USGS		35.5	-108.25	0.01	56	56	56	DNAA	SEDIMENTARY	UNKNOWN	UNKNOWN	ARKOSE
D230919		USGS		Geochemistry of rock samples from the National Geochemical Database: U.S. Geological Survey, Reston, VA.	U.S. Geological Survey	USGS		35.5	-108.25	0.01	56	56	56	ES	SEDIMENTARY	UNKNOWN	UNKNOWN	ARKOSE																					1	70			5						5
D230925		USGS		Geochemistry of rock samples from the National Geochemical Database: U.S. Geological Survey, Reston, VA.	U.S. Geological Survey	USGS		35.5	-108.25	0.01	56	56	56	DNAA	SEDIMENTARY	UNKNOWN	UNKNOWN	ARKOSE
D230925		USGS		Geochemistry of rock samples from the National Geochemical Database: U.S. Geological Survey, Reston, VA.	U.S. Geological Survey	USGS		35.5	-108.25	0.01	56	56	56	ES	SEDIMENTARY	UNKNOWN	UNKNOWN	ARKOSE																					1	30		5	10						5
D230926		USGS		Geochemistry of rock samples from the National Geochemical Database: U.S. Geological Survey, Reston, VA.	U.S. Geological Survey	USGS		35.5	-108.25	0.01	56	56	56	DNAA	SEDIMENTARY	UNKNOWN	UNKNOWN	ARKOSE
D230926		USGS		Geochemistry of rock samples from the National Geochemical Database: U.S. Geological Survey, Reston, VA.	U.S. Geological Survey	USGS		35.5	-108.25	0.01	56	56	56	ES	SEDIMENTARY	UNKNOWN	UNKNOWN	ARKOSE																					1.5	50		5	15						5
D230927		USGS		Geochemistry of rock samples from the National Geochemical Database: U.S. Geological Survey, Reston, VA.	U.S. Geological Survey	USGS		35.5	-108.25	0.01	56	56	56	DNAA	SEDIMENTARY	UNKNOWN	UNKNOWN	ARKOSE
D230927		USGS		Geochemistry of rock samples from the National Geochemical Database: U.S. Geological Survey, Reston, VA.	U.S. Geological Survey	USGS		35.5	-108.25	0.01	56	56	56	ES	SEDIMENTARY	UNKNOWN	UNKNOWN	ARKOSE																					0.7	150	5	5	7						7
D230932		USGS		Geochemistry of rock samples from the National Geochemical Database: U.S. Geological Survey, Reston, VA.	U.S. Geological Survey	USGS		35.5	-108.25	0.01	56	56	56	DNAA	SEDIMENTARY	UNKNOWN	UNKNOWN	ARKOSE
D230932		USGS		Geochemistry of rock samples from the National Geochemical Database: U.S. Geological Survey, Reston, VA.	U.S. Geological Survey	USGS		35.5	-108.25	0.01	56	56	56	ES	SEDIMENTARY	UNKNOWN	UNKNOWN	ARKOSE																					2	70			10						7
D230933		USGS		Geochemistry of rock samples from the National Geochemical Database: U.S. Geological Survey, Reston, VA.	U.S. Geological Survey	USGS		35.5	-108.25	0.01	56	56	56	DNAA	SEDIMENTARY	UNKNOWN	UNKNOWN	ARKOSE
D230933		USGS		Geochemistry of rock samples from the National Geochemical Database: U.S. Geological Survey, Reston, VA.	U.S. Geological Survey	USGS		35.5	-108.25	0.01	56	56	56	ES	SEDIMENTARY	UNKNOWN	UNKNOWN	ARKOSE																					1.5	50			20						7
D230934		USGS		Geochemistry of rock samples from the National Geochemical Database: U.S. Geological Survey, Reston, VA.	U.S. Geological Survey	USGS		35.5	-108.25	0.01	56	56	56	DNAA	SEDIMENTARY	UNKNOWN	UNKNOWN	ARKOSE
D230934		USGS		Geochemistry of rock samples from the National Geochemical Database: U.S. Geological Survey, Reston, VA.	U.S. Geological Survey	USGS		35.5	-108.25	0.01	56	56	56	ES	SEDIMENTARY	UNKNOWN	UNKNOWN	ARKOSE																					3	70	7		50						7
D230937		USGS		Geochemistry of rock samples from the National Geochemical Database: U.S. Geological Survey, Reston, VA.	U.S. Geological Survey	USGS		35.5	-108.25	0.01	56	56	56	DNAA	SEDIMENTARY	UNKNOWN	UNKNOWN	ARKOSE
D230937		USGS		Geochemistry of rock samples from the National Geochemical Database: U.S. Geological Survey, Reston, VA.	U.S. Geological Survey	USGS		35.5	-108.25	0.01	56	56	56	ES	SEDIMENTARY	UNKNOWN	UNKNOWN	ARKOSE																					1.5	70	5		10						7
D230938		USGS		Geochemistry of rock samples from the National Geochemical Database: U.S. Geological Survey, Reston, VA.	U.S. Geological Survey	USGS		35.5	-108.25	0.01	56	56	56	DNAA	SEDIMENTARY	UNKNOWN	UNKNOWN	ARKOSE
D230938		USGS		Geochemistry of rock samples from the National Geochemical Database: U.S. Geological Survey, Reston, VA.	U.S. Geological Survey	USGS		35.5	-108.25	0.01	56	56	56	ES	SEDIMENTARY	UNKNOWN	UNKNOWN	ARKOSE																					0.3	30			2						7
D230939		USGS		Geochemistry of rock samples from the National Geochemical Database: U.S. Geological Survey, Reston, VA.	U.S. Geological Survey	USGS		35.5	-108.25	0.01	56	56	56	DNAA	SEDIMENTARY	UNKNOWN	UNKNOWN	ARKOSE
D230939		USGS		Geochemistry of rock samples from the National Geochemical Database: U.S. Geological Survey, Reston, VA.	U.S. Geological Survey	USGS		35.5	-108.25	0.01	56	56	56	ES	SEDIMENTARY	UNKNOWN	UNKNOWN	ARKOSE																					0.5	30		5	30				50		7
D230941		USGS		Geochemistry of rock samples from the National Geochemical Database: U.S. Geological Survey, Reston, VA.	U.S. Geological Survey	USGS		35.5	-108.25	0.01	56	56	56	DNAA	SEDIMENTARY	UNKNOWN	UNKNOWN	ARKOSE
D230941		USGS		Geochemistry of rock samples from the National Geochemical Database: U.S. Geological Survey, Reston, VA.	U.S. Geological Survey	USGS		35.5	-108.25	0.01	56	56	56	ES	SEDIMENTARY	UNKNOWN	UNKNOWN	ARKOSE																					5	100			10						3
D230944		USGS		Geochemistry of rock samples from the National Geochemical Database: U.S. Geological Survey, Reston, VA.	U.S. Geological Survey	USGS		35.5	-108.25	0.01	56	56	56	DNAA	SEDIMENTARY	UNKNOWN	UNKNOWN	ARKOSE
D230944		USGS		Geochemistry of rock samples from the National Geochemical Database: U.S. Geological Survey, Reston, VA.	U.S. Geological Survey	USGS		35.5	-108.25	0.01	56	56	56	ES	SEDIMENTARY	UNKNOWN	UNKNOWN	ARKOSE																					0.5	30			10						5
D230945		USGS		Geochemistry of rock samples from the National Geochemical Database: U.S. Geological Survey, Reston, VA.	U.S. Geological Survey	USGS		35.5	-108.25	0.01	56	56	56	DNAA	SEDIMENTARY	UNKNOWN	UNKNOWN	ARKOSE
D230945		USGS		Geochemistry of rock samples from the National Geochemical Database: U.S. Geological Survey, Reston, VA.	U.S. Geological Survey	USGS		35.5	-108.25	0.01	56	56	56	ES	SEDIMENTARY	UNKNOWN	UNKNOWN	ARKOSE																					3	70	30	70	30		2000				7
D230946		USGS		Geochemistry of rock samples from the National Geochemical Database: U.S. Geological Survey, Reston, VA.	U.S. Geological Survey	USGS		35.5	-108.25	0.01	56	56	56	DNAA	SEDIMENTARY	UNKNOWN	UNKNOWN	ARKOSE
D230946		USGS		Geochemistry of rock samples from the National Geochemical Database: U.S. Geological Survey, Reston, VA.	U.S. Geological Survey	USGS		35.5	-108.25	0.01	56	56	56	ES	SEDIMENTARY	UNKNOWN	UNKNOWN	ARKOSE																					0.3	30			20						7
D230947		USGS		Geochemistry of rock samples from the National Geochemical Database: U.S. Geological Survey, Reston, VA.	U.S. Geological Survey	USGS		35.5	-108.25	0.01	56	56	56	DNAA	SEDIMENTARY	UNKNOWN	UNKNOWN	ARKOSE
D230947		USGS		Geochemistry of rock samples from the National Geochemical Database: U.S. Geological Survey, Reston, VA.	U.S. Geological Survey	USGS		35.5	-108.25	0.01	56	56	56	ES	SEDIMENTARY	UNKNOWN	UNKNOWN	ARKOSE																					1	50	7	30	30						7
D237794		USGS		Geochemistry of rock samples from the National Geochemical Database: U.S. Geological Survey, Reston, VA.	U.S. Geological Survey	USGS		35.9667	-111.583	0.01	59	59	59	AAS	SEDIMENTARY	UNKNOWN	UNKNOWN	ARKOSE																												780
D237794		USGS		Geochemistry of rock samples from the National Geochemical Database: U.S. Geological Survey, Reston, VA.	U.S. Geological Survey	USGS		35.9667	-111.583	0.01	59	59	59	DNAA	SEDIMENTARY	UNKNOWN	UNKNOWN	ARKOSE
D237794		USGS		Geochemistry of rock samples from the National Geochemical Database: U.S. Geological Survey, Reston, VA.	U.S. Geological Survey	USGS		35.9667	-111.583	0.01	59	59	59	ICPAES	SEDIMENTARY	UNKNOWN	UNKNOWN	ARKOSE																					4.6	46	32	43	78	4	600				6.8
D237794		USGS		Geochemistry of rock samples from the National Geochemical Database: U.S. Geological Survey, Reston, VA.	U.S. Geological Survey	USGS		35.9667	-111.583	0.01	59	59	59	UNKNOWN	SEDIMENTARY	UNKNOWN	UNKNOWN	ARKOSE																											600
D237794		USGS		Geochemistry of rock samples from the National Geochemical Database: U.S. Geological Survey, Reston, VA.	U.S. Geological Survey	USGS		35.9667	-111.583	0.01	59	59	59	XRF	SEDIMENTARY	UNKNOWN	UNKNOWN	ARKOSE
D333825		USGS		Geochemistry of rock samples from the National Geochemical Database: U.S. Geological Survey, Reston, VA.	U.S. Geological Survey	USGS		31.9278	-109.258	0.01				AAS	SEDIMENTARY	UNKNOWN	UNKNOWN	ARKOSE
D333825		USGS		Geochemistry of rock samples from the National Geochemical Database: U.S. Geological Survey, Reston, VA.	U.S. Geological Survey	USGS		31.9278	-109.258	0.01				ICPAES	SEDIMENTARY	UNKNOWN	UNKNOWN	ARKOSE																							7.4						0.029
D333825		USGS		Geochemistry of rock samples from the National Geochemical Database: U.S. Geological Survey, Reston, VA.	U.S. Geological Survey	USGS		31.9278	-109.258	0.01				MISC	SEDIMENTARY	UNKNOWN	UNKNOWN	ARKOSE																	1.01
D333825		USGS		Geochemistry of rock samples from the National Geochemical Database: U.S. Geological Survey, Reston, VA.	U.S. Geological Survey	USGS		31.9278	-109.258	0.01				NAA	SEDIMENTARY	UNKNOWN	UNKNOWN	ARKOSE																					0.735		5.94	1.95			11.1	0.809
D333825		USGS		Geochemistry of rock samples from the National Geochemical Database: U.S. Geological Survey, Reston, VA.	U.S. Geological Survey	USGS		31.9278	-109.258	0.01				XRF	SEDIMENTARY	UNKNOWN	UNKNOWN	ARKOSE		82.1	0.19	9.16							0.46	1.18	3.77	0.09
D388852		USGS		Geochemistry of rock samples from the National Geochemical Database: U.S. Geological Survey, Reston, VA.	U.S. Geological Survey	USGS		32.5333	-110.7	0.01	65	65	65	MISC	SEDIMENTARY	UNKNOWN	UNKNOWN	ARKOSE								2.76									2.27
D388852		USGS		Geochemistry of rock samples from the National Geochemical Database: U.S. Geological Survey, Reston, VA.	U.S. Geological Survey	USGS		32.5333	-110.7	0.01	65	65	65	XRF	SEDIMENTARY	UNKNOWN	UNKNOWN	ARKOSE		63.6	0.94	14.7						0.09	1.99	4.22	2.51	2.7	0.2
D411945		USGS		Geochemistry of rock samples from the National Geochemical Database: U.S. Geological Survey, Reston, VA.	U.S. Geological Survey	USGS		31.75	-110.75	0.01	65	65	65	UNKNOWN	SEDIMENTARY	UNKNOWN	UNKNOWN	ARKOSE																					2	3000	7	15	5000	300	1000		1500
D411946		USGS		Geochemistry of rock samples from the National Geochemical Database: U.S. Geological Survey, Reston, VA.	U.S. Geological Survey	USGS		31.75	-110.75	0.01	65	65	65	UNKNOWN	SEDIMENTARY	UNKNOWN	UNKNOWN	ARKOSE																					1.5	1500	7		150	200			700
D411947		USGS		Geochemistry of rock samples from the National Geochemical Database: U.S. Geological Survey, Reston, VA.	U.S. Geological Survey	USGS		31.75	-110.75	0.01	65	65	65	UNKNOWN	SEDIMENTARY	UNKNOWN	UNKNOWN	ARKOSE																					7	2000	10	7	5000		300		300
D411948		USGS		Geochemistry of rock samples from the National Geochemical Database: U.S. Geological Survey, Reston, VA.	U.S. Geological Survey	USGS		31.75	-110.75	0.01	65	65	65	UNKNOWN	SEDIMENTARY	UNKNOWN	UNKNOWN	ARKOSE																					5	1500	5	7	150				5
D411950		USGS		Geochemistry of rock samples from the National Geochemical Database: U.S. Geological Survey, Reston, VA.	U.S. Geological Survey	USGS		31.75	-110.75	0.01	65	65	65	UNKNOWN	SEDIMENTARY	UNKNOWN	UNKNOWN	ARKOSE																					5	1000		5	100				0.7
D411951		USGS		Geochemistry of rock samples from the National Geochemical Database: U.S. Geological Survey, Reston, VA.	U.S. Geological Survey	USGS		31.75	-110.75	0.01	65	65	65	UNKNOWN	SEDIMENTARY	UNKNOWN	UNKNOWN	ARKOSE																					5			20	1000		500		20
D411957		USGS		Geochemistry of rock samples from the National Geochemical Database: U.S. Geological Survey, Reston, VA.	U.S. Geological Survey	USGS		31.75	-110.75	0.01	65	65	65	UNKNOWN	SEDIMENTARY	UNKNOWN	UNKNOWN	ARKOSE																					2	700		7	300				15
D411963		USGS		Geochemistry of rock samples from the National Geochemical Database: U.S. Geological Survey, Reston, VA.	U.S. Geological Survey	USGS		31.75	-110.75	0.01	65	65	65	UNKNOWN	SEDIMENTARY	UNKNOWN	UNKNOWN	ARKOSE																					2	500	5		20
D411964		USGS		Geochemistry of rock samples from the National Geochemical Database: U.S. Geological Survey, Reston, VA.	U.S. Geological Survey	USGS		31.75	-110.75	0.01	65	65	65	UNKNOWN	SEDIMENTARY	UNKNOWN	UNKNOWN	ARKOSE																					5	500	10	7	30
D411965		USGS		Geochemistry of rock samples from the National Geochemical Database: U.S. Geological Survey, Reston, VA.	U.S. Geological Survey	USGS		31.75	-110.75	0.01	65	65	65	UNKNOWN	SEDIMENTARY	UNKNOWN	UNKNOWN	ARKOSE																					3	500	7	5	700	50	2000		300
D411968		USGS		Geochemistry of rock samples from the National Geochemical Database: U.S. Geological Survey, Reston, VA.	U.S. Geological Survey	USGS		31.75	-110.75	0.01	65	65	65	UNKNOWN	SEDIMENTARY	UNKNOWN	UNKNOWN	ARKOSE																					3	500	7	7	30	20			0.7
D411970		USGS		Geochemistry of rock samples from the National Geochemical Database: U.S. Geological Survey, Reston, VA.	U.S. Geological Survey	USGS		31.75	-110.75	0.01	65	65	65	UNKNOWN	SEDIMENTARY	UNKNOWN	UNKNOWN	ARKOSE																					0.7	300			5	20
D411973		USGS		Geochemistry of rock samples from the National Geochemical Database: U.S. Geological Survey, Reston, VA.	U.S. Geological Survey	USGS		31.75	-110.75	0.01	65	65	65	UNKNOWN	SEDIMENTARY	UNKNOWN	UNKNOWN	ARKOSE																					0.5	1000			2000	50			500
D411974		USGS		Geochemistry of rock samples from the National Geochemical Database: U.S. Geological Survey, Reston, VA.	U.S. Geological Survey	USGS		31.75	-110.75	0.01	65	65	65	UNKNOWN	SEDIMENTARY	UNKNOWN	UNKNOWN	ARKOSE																					3	2000	5	5	20				20
D411989		USGS		Geochemistry of rock samples from the National Geochemical Database: U.S. Geological Survey, Reston, VA.	U.S. Geological Survey	USGS		31.75	-110.75	0.01	65	65	65	UNKNOWN	SEDIMENTARY	UNKNOWN	UNKNOWN	ARKOSE																					7	200	10		1000				1
D411990		USGS		Geochemistry of rock samples from the National Geochemical Database: U.S. Geological Survey, Reston, VA.	U.S. Geological Survey	USGS		31.75	-110.75	0.01	65	65	65	UNKNOWN	SEDIMENTARY	UNKNOWN	UNKNOWN	ARKOSE																					7	500			2000	50	10000		300
D411991		USGS		Geochemistry of rock samples from the National Geochemical Database: U.S. Geological Survey, Reston, VA.	U.S. Geological Survey	USGS		31.75	-110.75	0.01	65	65	65	UNKNOWN	SEDIMENTARY	UNKNOWN	UNKNOWN	ARKOSE																					3	70	5		150				5
D411992		USGS		Geochemistry of rock samples from the National Geochemical Database: U.S. Geological Survey, Reston, VA.	U.S. Geological Survey	USGS		31.75	-110.75	0.01	65	65	65	UNKNOWN	SEDIMENTARY	UNKNOWN	UNKNOWN	ARKOSE																					5	500	5	5	100		300		1.5
D535005		USGS		Geochemistry of rock samples from the National Geochemical Database: U.S. Geological Survey, Reston, VA.	U.S. Geological Survey	USGS		44.6119	-116.949	0.01				DNAA	SEDIMENTARY	UNKNOWN	UNKNOWN	ARKOSE
D535005		USGS		Geochemistry of rock samples from the National Geochemical Database: U.S. Geological Survey, Reston, VA.	U.S. Geological Survey	USGS		44.6119	-116.949	0.01				ICPAES	SEDIMENTARY	UNKNOWN	UNKNOWN	ARKOSE																					0.72	37			7.7	0.06	6.3	1.1			7
D549551		USGS		Geochemistry of rock samples from the National Geochemical Database: U.S. Geological Survey, Reston, VA.	U.S. Geological Survey	USGS		47.3333	-120.625	0.01	18	18	18	ICPAES	SEDIMENTARY	UNKNOWN	UNKNOWN	ARKOSE																					6	430	24	15	29		57				6.3
D579005		USGS		Geochemistry of rock samples from the National Geochemical Database: U.S. Geological Survey, Reston, VA.	U.S. Geological Survey	USGS		44.0186	-117.505	0.01	3	3	3	ICPAES	SEDIMENTARY	UNKNOWN	UNKNOWN	ARKOSE																					1.3	980			2		6				2.2
D579027		USGS		Geochemistry of rock samples from the National Geochemical Database: U.S. Geological Survey, Reston, VA.	U.S. Geological Survey	USGS		44.0375	-117.436	0.01	3	3	3	AAS	SEDIMENTARY	UNKNOWN	UNKNOWN	ARKOSE
D579027		USGS		Geochemistry of rock samples from the National Geochemical Database: U.S. Geological Survey, Reston, VA.	U.S. Geological Survey	USGS		44.0375	-117.436	0.01	3	3	3	ICPAES	SEDIMENTARY	UNKNOWN	UNKNOWN	ARKOSE																					3.6	1000	6	6	4		110	10			8.8
D579034		USGS		Geochemistry of rock samples from the National Geochemical Database: U.S. Geological Survey, Reston, VA.	U.S. Geological Survey	USGS		44.0244	-117.458	0.01	3	3	3	AAS	SEDIMENTARY	UNKNOWN	UNKNOWN	ARKOSE
D579034		USGS		Geochemistry of rock samples from the National Geochemical Database: U.S. Geological Survey, Reston, VA.	U.S. Geological Survey	USGS		44.0244	-117.458	0.01	3	3	3	ICPAES	SEDIMENTARY	UNKNOWN	UNKNOWN	ARKOSE																					2.5	1000	17	11	13		50	16			3
D579047		USGS		Geochemistry of rock samples from the National Geochemical Database: U.S. Geological Survey, Reston, VA.	U.S. Geological Survey	USGS		44.0767	-117.451	0.01	3	3	3	AAS	SEDIMENTARY	UNKNOWN	UNKNOWN	ARKOSE
D579047		USGS		Geochemistry of rock samples from the National Geochemical Database: U.S. Geological Survey, Reston, VA.	U.S. Geological Survey	USGS		44.0767	-117.451	0.01	3	3	3	ICPAES	SEDIMENTARY	UNKNOWN	UNKNOWN	ARKOSE																					12	9		1			3	500			5.2
D579048		USGS		Geochemistry of rock samples from the National Geochemical Database: U.S. Geological Survey, Reston, VA.	U.S. Geological Survey	USGS		44.0744	-117.453	0.01	3	3	3	AAS	SEDIMENTARY	UNKNOWN	UNKNOWN	ARKOSE
D579048		USGS		Geochemistry of rock samples from the National Geochemical Database: U.S. Geological Survey, Reston, VA.	U.S. Geological Survey	USGS		44.0744	-117.453	0.01	3	3	3	ICPAES	SEDIMENTARY	UNKNOWN	UNKNOWN	ARKOSE																					2	31	9	2	9		18	350			3.6
D579061		USGS		Geochemistry of rock samples from the National Geochemical Database: U.S. Geological Survey, Reston, VA.	U.S. Geological Survey	USGS		44.0394	-117.477	0.01	3	3	3	AAS	SEDIMENTARY	UNKNOWN	UNKNOWN	ARKOSE
D579061		USGS		Geochemistry of rock samples from the National Geochemical Database: U.S. Geological Survey, Reston, VA.	U.S. Geological Survey	USGS		44.0394	-117.477	0.01	3	3	3	ICPAES	SEDIMENTARY	UNKNOWN	UNKNOWN	ARKOSE																					7.2	150	8	3	22		110	630			0.94
D579064		USGS		Geochemistry of rock samples from the National Geochemical Database: U.S. Geological Survey, Reston, VA.	U.S. Geological Survey	USGS		44.0403	-117.459	0.01	3	3	3	AAS	SEDIMENTARY	UNKNOWN	UNKNOWN	ARKOSE
D579064		USGS		Geochemistry of rock samples from the National Geochemical Database: U.S. Geological Survey, Reston, VA.	U.S. Geological Survey	USGS		44.0403	-117.459	0.01	3	3	3	ICPAES	SEDIMENTARY	UNKNOWN	UNKNOWN	ARKOSE																					5.6	180					6	170			0.1
D579077		USGS		Geochemistry of rock samples from the National Geochemical Database: U.S. Geological Survey, Reston, VA.	U.S. Geological Survey	USGS		44.0728	-117.493	0.01	3	3	3	AAS	SEDIMENTARY	UNKNOWN	UNKNOWN	ARKOSE
D579077		USGS		Geochemistry of rock samples from the National Geochemical Database: U.S. Geological Survey, Reston, VA.	U.S. Geological Survey	USGS		44.0728	-117.493	0.01	3	3	3	ICPAES	SEDIMENTARY	UNKNOWN	UNKNOWN	ARKOSE																					2	260000	52	360	150	6	210	220			1.4
DAC227		USGS		Geochemistry of rock samples from the National Geochemical Database: U.S. Geological Survey, Reston, VA.	U.S. Geological Survey	USGS		42.7942	-123.569	0.01	44	44	44	AAS	SEDIMENTARY	UNKNOWN	UNKNOWN	ARKOSE
DAC227		USGS		Geochemistry of rock samples from the National Geochemical Database: U.S. Geological Survey, Reston, VA.	U.S. Geological Survey	USGS		42.7942	-123.569	0.01	44	44	44	ES	SEDIMENTARY	UNKNOWN	UNKNOWN	ARKOSE																						1000	100	20	50
DAC230		USGS		Geochemistry of rock samples from the National Geochemical Database: U.S. Geological Survey, Reston, VA.	U.S. Geological Survey	USGS		42.7919	-123.559	0.01	44	44	44	AAS	SEDIMENTARY	UNKNOWN	UNKNOWN	ARKOSE
DAC230		USGS		Geochemistry of rock samples from the National Geochemical Database: U.S. Geological Survey, Reston, VA.	U.S. Geological Survey	USGS		42.7919	-123.559	0.01	44	44	44	ES	SEDIMENTARY	UNKNOWN	UNKNOWN	ARKOSE																						500	150	20	70
DAC238		USGS		Geochemistry of rock samples from the National Geochemical Database: U.S. Geological Survey, Reston, VA.	U.S. Geological Survey	USGS		42.7725	-123.554	0.01	44	44	44	AAS	SEDIMENTARY	UNKNOWN	UNKNOWN	ARKOSE
DAC238		USGS		Geochemistry of rock samples from the National Geochemical Database: U.S. Geological Survey, Reston, VA.	U.S. Geological Survey	USGS		42.7725	-123.554	0.01	44	44	44	ES	SEDIMENTARY	UNKNOWN	UNKNOWN	ARKOSE																						700	100	30	50
DAE150		USGS		Geochemistry of rock samples from the National Geochemical Database: U.S. Geological Survey, Reston, VA.	U.S. Geological Survey	USGS		42.3842	-122.805	0.01				AAS	SEDIMENTARY	UNKNOWN	UNKNOWN	ARKOSE
DAE150		USGS		Geochemistry of rock samples from the National Geochemical Database: U.S. Geological Survey, Reston, VA.	U.S. Geological Survey	USGS		42.3842	-122.805	0.01				ES	SEDIMENTARY	UNKNOWN	UNKNOWN	ARKOSE																					7	300	50	15	30
ELL198		USGS		Geochemistry of rock samples from the National Geochemical Database: U.S. Geological Survey, Reston, VA.	U.S. Geological Survey	USGS		36.9956	-109.039	0.01				ES	SEDIMENTARY	UNKNOWN	UNKNOWN	ARKOSE																					2	1500	5	10	500
ENS892		USGS		Geochemistry of rock samples from the National Geochemical Database: U.S. Geological Survey, Reston, VA.	U.S. Geological Survey	USGS		38.7189	-116.337	0.01				AAS	SEDIMENTARY	UNKNOWN	UNKNOWN	ARKOSE																										0.7	73	322
ENS892		USGS		Geochemistry of rock samples from the National Geochemical Database: U.S. Geological Survey, Reston, VA.	U.S. Geological Survey	USGS		38.7189	-116.337	0.01				ES	SEDIMENTARY	UNKNOWN	UNKNOWN	ARKOSE																					3	15	20		70		200
LAW331		USGS		Geochemistry of rock samples from the National Geochemical Database: U.S. Geological Survey, Reston, VA.	U.S. Geological Survey	USGS		46.7733	-121.211	0.01				ES	SEDIMENTARY	UNKNOWN	UNKNOWN	ARKOSE																					3	500	15	7	20
LAW577		USGS		Geochemistry of rock samples from the National Geochemical Database: U.S. Geological Survey, Reston, VA.	U.S. Geological Survey	USGS		46.7889	-121.198	0.01				ES	SEDIMENTARY	UNKNOWN	UNKNOWN	ARKOSE																					0.7	150			10
LAW595		USGS		Geochemistry of rock samples from the National Geochemical Database: U.S. Geological Survey, Reston, VA.	U.S. Geological Survey	USGS		46.7611	-121.436	0.01				ES	SEDIMENTARY	UNKNOWN	UNKNOWN	ARKOSE																					2	700
LAW596		USGS		Geochemistry of rock samples from the National Geochemical Database: U.S. Geological Survey, Reston, VA.	U.S. Geological Survey	USGS		46.7606	-121.439	0.01				ES	SEDIMENTARY	UNKNOWN	UNKNOWN	ARKOSE																					5	700	30	10	30
LAW597		USGS		Geochemistry of rock samples from the National Geochemical Database: U.S. Geological Survey, Reston, VA.	U.S. Geological Survey	USGS		46.7606	-121.439	0.01				ES	SEDIMENTARY	UNKNOWN	UNKNOWN	ARKOSE																					7	700	50	20	20
LAW598		USGS		Geochemistry of rock samples from the National Geochemical Database: U.S. Geological Survey, Reston, VA.	U.S. Geological Survey	USGS		46.7603	-121.454	0.01				AAS	SEDIMENTARY	UNKNOWN	UNKNOWN	ARKOSE
LAW598		USGS		Geochemistry of rock samples from the National Geochemical Database: U.S. Geological Survey, Reston, VA.	U.S. Geological Survey	USGS		46.7603	-121.454	0.01				ES	SEDIMENTARY	UNKNOWN	UNKNOWN	ARKOSE																					15	1000	20	15	70		200
LAW599		USGS		Geochemistry of rock samples from the National Geochemical Database: U.S. Geological Survey, Reston, VA.	U.S. Geological Survey	USGS		46.76	-121.455	0.01				ES	SEDIMENTARY	UNKNOWN	UNKNOWN	ARKOSE																					5	500	5	5	10
LAW600		USGS		Geochemistry of rock samples from the National Geochemical Database: U.S. Geological Survey, Reston, VA.	U.S. Geological Survey	USGS		46.7597	-121.464	0.01				ES	SEDIMENTARY	UNKNOWN	UNKNOWN	ARKOSE																					3	500	7	7	15
LAZ194		USGS		Geochemistry of rock samples from the National Geochemical Database: U.S. Geological Survey, Reston, VA.	U.S. Geological Survey	USGS		46.7847	-121.4	0.01				ES	SEDIMENTARY	UNKNOWN	UNKNOWN	ARKOSE																					1.5	300	5		7
LAZ195		USGS		Geochemistry of rock samples from the National Geochemical Database: U.S. Geological Survey, Reston, VA.	U.S. Geological Survey	USGS		46.7897	-121.394	0.01				ES	SEDIMENTARY	UNKNOWN	UNKNOWN	ARKOSE																					7	500	30	20	5
LAZ285		USGS		Geochemistry of rock samples from the National Geochemical Database: U.S. Geological Survey, Reston, VA.	U.S. Geological Survey	USGS		46.7775	-121.226	0.01				AAS	SEDIMENTARY	UNKNOWN	UNKNOWN	ARKOSE
LAZ285		USGS		Geochemistry of rock samples from the National Geochemical Database: U.S. Geological Survey, Reston, VA.	U.S. Geological Survey	USGS		46.7775	-121.226	0.01				ES	SEDIMENTARY	UNKNOWN	UNKNOWN	ARKOSE																					7	700	70	10	20
LAZ427		USGS		Geochemistry of rock samples from the National Geochemical Database: U.S. Geological Survey, Reston, VA.	U.S. Geological Survey	USGS		46.8608	-121.329	0.01				ES	SEDIMENTARY	UNKNOWN	UNKNOWN	ARKOSE																					1.5	200	15		5
LAZ428		USGS		Geochemistry of rock samples from the National Geochemical Database: U.S. Geological Survey, Reston, VA.	U.S. Geological Survey	USGS		46.86	-121.328	0.01				ES	SEDIMENTARY	UNKNOWN	UNKNOWN	ARKOSE																					7	500
LAZ525		USGS		Geochemistry of rock samples from the National Geochemical Database: U.S. Geological Survey, Reston, VA.	U.S. Geological Survey	USGS		46.8625	-121.267	0.01				AAS	SEDIMENTARY	UNKNOWN	UNKNOWN	ARKOSE
LAZ525		USGS		Geochemistry of rock samples from the National Geochemical Database: U.S. Geological Survey, Reston, VA.	U.S. Geological Survey	USGS		46.8625	-121.267	0.01				ES	SEDIMENTARY	UNKNOWN	UNKNOWN	ARKOSE																					2	150	5		10
LAZ526		USGS		Geochemistry of rock samples from the National Geochemical Database: U.S. Geological Survey, Reston, VA.	U.S. Geological Survey	USGS		46.8625	-121.267	0.01				AAS	SEDIMENTARY	UNKNOWN	UNKNOWN	ARKOSE
LAZ526		USGS		Geochemistry of rock samples from the National Geochemical Database: U.S. Geological Survey, Reston, VA.	U.S. Geological Survey	USGS		46.8625	-121.267	0.01				ES	SEDIMENTARY	UNKNOWN	UNKNOWN	ARKOSE																					7	2000		5	50
LAZ651		USGS		Geochemistry of rock samples from the National Geochemical Database: U.S. Geological Survey, Reston, VA.	U.S. Geological Survey	USGS		46.7722	-121.179	0.01				AAS	SEDIMENTARY	UNKNOWN	UNKNOWN	ARKOSE
LAZ651		USGS		Geochemistry of rock samples from the National Geochemical Database: U.S. Geological Survey, Reston, VA.	U.S. Geological Survey	USGS		46.7722	-121.179	0.01				ES	SEDIMENTARY	UNKNOWN	UNKNOWN	ARKOSE																					1.5	150	10		5
LAZ655		USGS		Geochemistry of rock samples from the National Geochemical Database: U.S. Geological Survey, Reston, VA.	U.S. Geological Survey	USGS		46.7689	-121.174	0.01				AAS	SEDIMENTARY	UNKNOWN	UNKNOWN	ARKOSE
LAZ655		USGS		Geochemistry of rock samples from the National Geochemical Database: U.S. Geological Survey, Reston, VA.	U.S. Geological Survey	USGS		46.7689	-121.174	0.01				ES	SEDIMENTARY	UNKNOWN	UNKNOWN	ARKOSE																					1.5	300			5
LAZ750		USGS		Geochemistry of rock samples from the National Geochemical Database: U.S. Geological Survey, Reston, VA.	U.S. Geological Survey	USGS		46.7511	-121.233	0.01				AAS	SEDIMENTARY	UNKNOWN	UNKNOWN	ARKOSE
LAZ750		USGS		Geochemistry of rock samples from the National Geochemical Database: U.S. Geological Survey, Reston, VA.	U.S. Geological Survey	USGS		46.7511	-121.233	0.01				ES	SEDIMENTARY	UNKNOWN	UNKNOWN	ARKOSE																					3	150	15	5	5
LAZ824		USGS		Geochemistry of rock samples from the National Geochemical Database: U.S. Geological Survey, Reston, VA.	U.S. Geological Survey	USGS		46.7547	-121.241	0.01				AAS	SEDIMENTARY	UNKNOWN	UNKNOWN	ARKOSE
LAZ824		USGS		Geochemistry of rock samples from the National Geochemical Database: U.S. Geological Survey, Reston, VA.	U.S. Geological Survey	USGS		46.7547	-121.241	0.01				ES	SEDIMENTARY	UNKNOWN	UNKNOWN	ARKOSE																					7	700	100	20	15
LAZ831		USGS		Geochemistry of rock samples from the National Geochemical Database: U.S. Geological Survey, Reston, VA.	U.S. Geological Survey	USGS		46.7553	-121.202	0.01				AAS	SEDIMENTARY	UNKNOWN	UNKNOWN	ARKOSE
LAZ831		USGS		Geochemistry of rock samples from the National Geochemical Database: U.S. Geological Survey, Reston, VA.	U.S. Geological Survey	USGS		46.7553	-121.202	0.01				ES	SEDIMENTARY	UNKNOWN	UNKNOWN	ARKOSE																					7	700	70	10	15
LBG080		USGS		Geochemistry of rock samples from the National Geochemical Database: U.S. Geological Survey, Reston, VA.	U.S. Geological Survey	USGS		46.7681	-121.442	0.01				AAS	SEDIMENTARY	UNKNOWN	UNKNOWN	ARKOSE
LBG080		USGS		Geochemistry of rock samples from the National Geochemical Database: U.S. Geological Survey, Reston, VA.	U.S. Geological Survey	USGS		46.7681	-121.442	0.01				ES	SEDIMENTARY	UNKNOWN	UNKNOWN	ARKOSE																					3	200	10	5	7
LBG111		USGS		Geochemistry of rock samples from the National Geochemical Database: U.S. Geological Survey, Reston, VA.	U.S. Geological Survey	USGS		46.7703	-121.453	0.01				AAS	SEDIMENTARY	UNKNOWN	UNKNOWN	ARKOSE
LBG111		USGS		Geochemistry of rock samples from the National Geochemical Database: U.S. Geological Survey, Reston, VA.	U.S. Geological Survey	USGS		46.7703	-121.453	0.01				ES	SEDIMENTARY	UNKNOWN	UNKNOWN	ARKOSE																					15	2000		20	15
LBZ397		USGS		Geochemistry of rock samples from the National Geochemical Database: U.S. Geological Survey, Reston, VA.	U.S. Geological Survey	USGS		39.0297	-106.845	0.01	70	70	70	AAS	SEDIMENTARY	UNKNOWN	UNKNOWN	ARKOSE																											10
LBZ397		USGS		Geochemistry of rock samples from the National Geochemical Database: U.S. Geological Survey, Reston, VA.	U.S. Geological Survey	USGS		39.0297	-106.845	0.01	70	70	70	ES	SEDIMENTARY	UNKNOWN	UNKNOWN	ARKOSE																					7	200		20	30				1
M106831		USGS		Geochemistry of rock samples from the National Geochemical Database: U.S. Geological Survey, Reston, VA.	U.S. Geological Survey	USGS		40.8	-110.583	0.01				UNKNOWN	SEDIMENTARY	UNKNOWN	UNKNOWN	ARKOSE		81.1	0.12	8.7		1		0.52			0.21	0.14	1.8	3.2	0.02						1	70	1.5		7						2
M106834		USGS		Geochemistry of rock samples from the National Geochemical Database: U.S. Geological Survey, Reston, VA.	U.S. Geological Survey	USGS		40.8167	-110.917	0.01				UNKNOWN	SEDIMENTARY	UNKNOWN	UNKNOWN	ARKOSE		82.3	0.27	9		1.7		0.2			0.23	0.14	1.8	2.1	0.02						1	50	1.5		2						2
M111998		USGS		Geochemistry of rock samples from the National Geochemical Database: U.S. Geological Survey, Reston, VA.	U.S. Geological Survey	USGS		40.5	-117	0.01	67	67	67	UNKNOWN	SEDIMENTARY	UNKNOWN	UNKNOWN	ARKOSE		78.5	0.39	10.4		1.1		1.5			1.2	0.45	2.7	1.9	0.24						2	150	15	7	100						5
M123078		USGS		Geochemistry of rock samples from the National Geochemical Database: U.S. Geological Survey, Reston, VA.	U.S. Geological Survey	USGS		37.1042	-121.808	0.01	15	16.5	18	UNKNOWN	SEDIMENTARY	UNKNOWN	UNKNOWN	ARKOSE		83.3	0.08	8.6		0.3		0.4			0.25	1.7	1.3	1	0.02						0.3	150			3						2
M159749		USGS		Geochemistry of rock samples from the National Geochemical Database: U.S. Geological Survey, Reston, VA.	U.S. Geological Survey	USGS		40.625	-117	0.01	67	67	67	UNKNOWN	SEDIMENTARY	UNKNOWN	UNKNOWN	ARKOSE								0.12
M159749		USGS		Geochemistry of rock samples from the National Geochemical Database: U.S. Geological Survey, Reston, VA.	U.S. Geological Survey	USGS		40.625	-117	0.01	67	67	67	ICPAES	SEDIMENTARY	UNKNOWN	UNKNOWN	ARKOSE																					1	180	9	4	7		14				3.2
M159749		USGS		Geochemistry of rock samples from the National Geochemical Database: U.S. Geological Survey, Reston, VA.	U.S. Geological Survey	USGS		40.625	-117	0.01	67	67	67	MISC	SEDIMENTARY	UNKNOWN	UNKNOWN	ARKOSE
M159749		USGS		Geochemistry of rock samples from the National Geochemical Database: U.S. Geological Survey, Reston, VA.	U.S. Geological Survey	USGS		40.625	-117	0.01	67	67	67	XRF	SEDIMENTARY	UNKNOWN	UNKNOWN	ARKOSE		88.3	0.4	5.84							0.45	0.19	1.01	1.17	0.08
M159750		USGS		Geochemistry of rock samples from the National Geochemical Database: U.S. Geological Survey, Reston, VA.	U.S. Geological Survey	USGS		40.625	-117	0.01	67	67	67	ICPAES	SEDIMENTARY	UNKNOWN	UNKNOWN	ARKOSE																					2.5	220	18	5	18		52				3.8
M159750		USGS		Geochemistry of rock samples from the National Geochemical Database: U.S. Geological Survey, Reston, VA.	U.S. Geological Survey	USGS		40.625	-117	0.01	67	67	67	MISC	SEDIMENTARY	UNKNOWN	UNKNOWN	ARKOSE
M159750		USGS		Geochemistry of rock samples from the National Geochemical Database: U.S. Geological Survey, Reston, VA.	U.S. Geological Survey	USGS		40.625	-117	0.01	67	67	67	UNKNOWN	SEDIMENTARY	UNKNOWN	UNKNOWN	ARKOSE								0.8
M159750		USGS		Geochemistry of rock samples from the National Geochemical Database: U.S. Geological Survey, Reston, VA.	U.S. Geological Survey	USGS		40.625	-117	0.01	67	67	67	XRF	SEDIMENTARY	UNKNOWN	UNKNOWN	ARKOSE		83.6	0.38	6.96							0.92	0.16	1.03	1.25	0.09
M159751		USGS		Geochemistry of rock samples from the National Geochemical Database: U.S. Geological Survey, Reston, VA.	U.S. Geological Survey	USGS		40.625	-117	0.01	67	67	67	ICPAES	SEDIMENTARY	UNKNOWN	UNKNOWN	ARKOSE																					1	160	11	6	8		17				3.2
M159751		USGS		Geochemistry of rock samples from the National Geochemical Database: U.S. Geological Survey, Reston, VA.	U.S. Geological Survey	USGS		40.625	-117	0.01	67	67	67	MISC	SEDIMENTARY	UNKNOWN	UNKNOWN	ARKOSE
M159751		USGS		Geochemistry of rock samples from the National Geochemical Database: U.S. Geological Survey, Reston, VA.	U.S. Geological Survey	USGS		40.625	-117	0.01	67	67	67	UNKNOWN	SEDIMENTARY	UNKNOWN	UNKNOWN	ARKOSE								0.56
M159751		USGS		Geochemistry of rock samples from the National Geochemical Database: U.S. Geological Survey, Reston, VA.	U.S. Geological Survey	USGS		40.625	-117	0.01	67	67	67	XRF	SEDIMENTARY	UNKNOWN	UNKNOWN	ARKOSE		74	0.47	5.48							0.51	8.26	0.53	1.93
M159752		USGS		Geochemistry of rock samples from the National Geochemical Database: U.S. Geological Survey, Reston, VA.	U.S. Geological Survey	USGS		40.625	-117	0.01	67	67	67	ICPAES	SEDIMENTARY	UNKNOWN	UNKNOWN	ARKOSE																					6	720	39	17	11		60		2		10
M159752		USGS		Geochemistry of rock samples from the National Geochemical Database: U.S. Geological Survey, Reston, VA.	U.S. Geological Survey	USGS		40.625	-117	0.01	67	67	67	MISC	SEDIMENTARY	UNKNOWN	UNKNOWN	ARKOSE
M159752		USGS		Geochemistry of rock samples from the National Geochemical Database: U.S. Geological Survey, Reston, VA.	U.S. Geological Survey	USGS		40.625	-117	0.01	67	67	67	UNKNOWN	SEDIMENTARY	UNKNOWN	UNKNOWN	ARKOSE								5.5
M159752		USGS		Geochemistry of rock samples from the National Geochemical Database: U.S. Geological Survey, Reston, VA.	U.S. Geological Survey	USGS		40.625	-117	0.01	67	67	67	XRF	SEDIMENTARY	UNKNOWN	UNKNOWN	ARKOSE		57.8	1.03	19.6						0.08	3.03	0.29	0.95	5.83	0.11
M159753		USGS		Geochemistry of rock samples from the National Geochemical Database: U.S. Geological Survey, Reston, VA.	U.S. Geological Survey	USGS		40.625	-117	0.01	67	67	67	ICPAES	SEDIMENTARY	UNKNOWN	UNKNOWN	ARKOSE																					3.9	600	11	6	19		42				8.8
M159753		USGS		Geochemistry of rock samples from the National Geochemical Database: U.S. Geological Survey, Reston, VA.	U.S. Geological Survey	USGS		40.625	-117	0.01	67	67	67	MISC	SEDIMENTARY	UNKNOWN	UNKNOWN	ARKOSE
M159753		USGS		Geochemistry of rock samples from the National Geochemical Database: U.S. Geological Survey, Reston, VA.	U.S. Geological Survey	USGS		40.625	-117	0.01	67	67	67	UNKNOWN	SEDIMENTARY	UNKNOWN	UNKNOWN	ARKOSE								3.2
M159753		USGS		Geochemistry of rock samples from the National Geochemical Database: U.S. Geological Survey, Reston, VA.	U.S. Geological Survey	USGS		40.625	-117	0.01	67	67	67	XRF	SEDIMENTARY	UNKNOWN	UNKNOWN	ARKOSE		66.6	0.79	16.5						0.07	2.17	0.27	0.78	4.27	0.07
M159754		USGS		Geochemistry of rock samples from the National Geochemical Database: U.S. Geological Survey, Reston, VA.	U.S. Geological Survey	USGS		40.625	-117	0.01	67	67	67	ICPAES	SEDIMENTARY	UNKNOWN	UNKNOWN	ARKOSE																					4.9	520	29	4	15		74				6.3
M159754		USGS		Geochemistry of rock samples from the National Geochemical Database: U.S. Geological Survey, Reston, VA.	U.S. Geological Survey	USGS		40.625	-117	0.01	67	67	67	MISC	SEDIMENTARY	UNKNOWN	UNKNOWN	ARKOSE
M159754		USGS		Geochemistry of rock samples from the National Geochemical Database: U.S. Geological Survey, Reston, VA.	U.S. Geological Survey	USGS		40.625	-117	0.01	67	67	67	UNKNOWN	SEDIMENTARY	UNKNOWN	UNKNOWN	ARKOSE								4.2
M159754		USGS		Geochemistry of rock samples from the National Geochemical Database: U.S. Geological Survey, Reston, VA.	U.S. Geological Survey	USGS		40.625	-117	0.01	67	67	67	XRF	SEDIMENTARY	UNKNOWN	UNKNOWN	ARKOSE		72.9	0.54	11.3						0.06	2.18	0.31	2.05	1.61	0.09
M182687		USGS		Geochemistry of rock samples from the National Geochemical Database: U.S. Geological Survey, Reston, VA.	U.S. Geological Survey	USGS		40	-116	0.01	43	43	43	AAS	SEDIMENTARY	UNKNOWN	UNKNOWN	ARKOSE																												2.8
M182687		USGS		Geochemistry of rock samples from the National Geochemical Database: U.S. Geological Survey, Reston, VA.	U.S. Geological Survey	USGS		40	-116	0.01	43	43	43	ICPAES	SEDIMENTARY	UNKNOWN	UNKNOWN	ARKOSE																					0.78	360	4	3	4	0.3	14				0.66
M182707		USGS		Geochemistry of rock samples from the National Geochemical Database: U.S. Geological Survey, Reston, VA.	U.S. Geological Survey	USGS		40.25	-116.25	0.01	43	43	43	AAS	SEDIMENTARY	UNKNOWN	UNKNOWN	ARKOSE																												14
M182707		USGS		Geochemistry of rock samples from the National Geochemical Database: U.S. Geological Survey, Reston, VA.	U.S. Geological Survey	USGS		40.25	-116.25	0.01	43	43	43	ICPAES	SEDIMENTARY	UNKNOWN	UNKNOWN	ARKOSE																					5.3	540	22	26	68	0.5	13	13			7
M182710		USGS		Geochemistry of rock samples from the National Geochemical Database: U.S. Geological Survey, Reston, VA.	U.S. Geological Survey	USGS		40.25	-116.25	0.01	43	43	43	AAS	SEDIMENTARY	UNKNOWN	UNKNOWN	ARKOSE																												5.7
M182710		USGS		Geochemistry of rock samples from the National Geochemical Database: U.S. Geological Survey, Reston, VA.	U.S. Geological Survey	USGS		40.25	-116.25	0.01	43	43	43	ICPAES	SEDIMENTARY	UNKNOWN	UNKNOWN	ARKOSE																					2	550	36	7	15	0.6	19	6			7.3
W168081		USGS		Geochemistry of rock samples from the National Geochemical Database: U.S. Geological Survey, Reston, VA.	U.S. Geological Survey	USGS		36.6333	-81.6333	0.01	72	72	72	UNKNOWN	SEDIMENTARY	UNKNOWN	UNKNOWN	ARKOSE		77	0.3	12		1.2		0.52		0.05	0.6	0.34	3	4	0.08										20
W168082		USGS		Geochemistry of rock samples from the National Geochemical Database: U.S. Geological Survey, Reston, VA.	U.S. Geological Survey	USGS		36.6333	-81.6333	0.01	72	72	72	UNKNOWN	SEDIMENTARY	UNKNOWN	UNKNOWN	ARKOSE		77.2	0.38	12		1.7		0.76		0.02	0.27	0.02	2.5	3.4	0.08										3
W168083		USGS		Geochemistry of rock samples from the National Geochemical Database: U.S. Geological Survey, Reston, VA.	U.S. Geological Survey	USGS		36.6333	-81.6333	0.01	67	69.5	72	UNKNOWN	SEDIMENTARY	UNKNOWN	UNKNOWN	ARKOSE		87	0.38	5.8		1.8		0.32		0.06	0.37		0.21	2.4	0.02										3
W171669		USGS		Geochemistry of rock samples from the National Geochemical Database: U.S. Geological Survey, Reston, VA.	U.S. Geological Survey	USGS		43.8167	-110.317	0.01	65	65	65	UNKNOWN	SEDIMENTARY	UNKNOWN	UNKNOWN	ARKOSE		43.6	0.27	5.5		0.73		0.88		0.41	0.9	24.1	1.1	1.4	0.17										7
W171671		USGS		Geochemistry of rock samples from the National Geochemical Database: U.S. Geological Survey, Reston, VA.	U.S. Geological Survey	USGS		44	-110.5	0.01	65	65	65	UNKNOWN	SEDIMENTARY	UNKNOWN	UNKNOWN	ARKOSE		48.7	0.47	8.3		1.1		0.88		0.67	0.9	18.7	1.6	1.5	0.09									7	7
W171673		USGS		Geochemistry of rock samples from the National Geochemical Database: U.S. Geological Survey, Reston, VA.	U.S. Geological Survey	USGS		43.8	-110.3	0.01	65	65	65	UNKNOWN	SEDIMENTARY	UNKNOWN	UNKNOWN	ARKOSE		84.5	0.24	7.1		0.44		0.28			0.7	1.5	0.34	1.2	0.09										5
W171675		USGS		Geochemistry of rock samples from the National Geochemical Database: U.S. Geological Survey, Reston, VA.	U.S. Geological Survey	USGS		44	-110.333	0.01	65	65	65	UNKNOWN	SEDIMENTARY	UNKNOWN	UNKNOWN	ARKOSE		77.8	0.35	8.2		1.2		0.72			1.1	2.2	1	1.9	0.09										10
W171676		USGS		Geochemistry of rock samples from the National Geochemical Database: U.S. Geological Survey, Reston, VA.	U.S. Geological Survey	USGS		43.9667	-110.333	0.01	65	65	65	UNKNOWN	SEDIMENTARY	UNKNOWN	UNKNOWN	ARKOSE		81.5	0.35	7.1		1.2		0.56		0.04	0.93	0.89	0.89	1.6	0.09									3	7
W171678		USGS		Geochemistry of rock samples from the National Geochemical Database: U.S. Geological Survey, Reston, VA.	U.S. Geological Survey	USGS		43.9167	-110.417	0.01	65	65	65	UNKNOWN	SEDIMENTARY	UNKNOWN	UNKNOWN	ARKOSE		73.5	0.59	8.7		4		3.2		0.05	1.8	0.81	0.85	1.7	0.14										7
W171903		USGS		Geochemistry of rock samples from the National Geochemical Database: U.S. Geological Survey, Reston, VA.	U.S. Geological Survey	USGS		41.6489	-72.6575	0.01	59	59	59	UNKNOWN	SEDIMENTARY	UNKNOWN	UNKNOWN	ARKOSE		66.9	0.46	9.8		0.56		0.4		0.21	0.22	8.6	4.1	0.99	0.15	0.12									300
W219570		USGS		Geochemistry of rock samples from the National Geochemical Database: U.S. Geological Survey, Reston, VA.	U.S. Geological Survey	USGS		48.1667	-91.1667	0.01	66	66	66	MISC	SEDIMENTARY	UNKNOWN	UNKNOWN	ARKOSE
W219570		USGS		Geochemistry of rock samples from the National Geochemical Database: U.S. Geological Survey, Reston, VA.	U.S. Geological Survey	USGS		48.1667	-91.1667	0.01	66	66	66	NAA	SEDIMENTARY	UNKNOWN	UNKNOWN	ARKOSE																					0.808			1.47			16.9
W219570		USGS		Geochemistry of rock samples from the National Geochemical Database: U.S. Geological Survey, Reston, VA.	U.S. Geological Survey	USGS		48.1667	-91.1667	0.01	66	66	66	UNKNOWN	SEDIMENTARY	UNKNOWN	UNKNOWN	ARKOSE								0.28
W219570		USGS		Geochemistry of rock samples from the National Geochemical Database: U.S. Geological Survey, Reston, VA.	U.S. Geological Survey	USGS		48.1667	-91.1667	0.01	66	66	66	XRF	SEDIMENTARY	UNKNOWN	UNKNOWN	ARKOSE		79.6	0.21	13.2							0.4	0.26	4.58	2.39
W219571		USGS		Geochemistry of rock samples from the National Geochemical Database: U.S. Geological Survey, Reston, VA.	U.S. Geological Survey	USGS		48.1667	-91.1667	0.01	66	66	66	MISC	SEDIMENTARY	UNKNOWN	UNKNOWN	ARKOSE
W219571		USGS		Geochemistry of rock samples from the National Geochemical Database: U.S. Geological Survey, Reston, VA.	U.S. Geological Survey	USGS		48.1667	-91.1667	0.01	66	66	66	NAA	SEDIMENTARY	UNKNOWN	UNKNOWN	ARKOSE																					1.67			6.57			45.8
W219571		USGS		Geochemistry of rock samples from the National Geochemical Database: U.S. Geological Survey, Reston, VA.	U.S. Geological Survey	USGS		48.1667	-91.1667	0.01	66	66	66	UNKNOWN	SEDIMENTARY	UNKNOWN	UNKNOWN	ARKOSE								1.1
W219571		USGS		Geochemistry of rock samples from the National Geochemical Database: U.S. Geological Survey, Reston, VA.	U.S. Geological Survey	USGS		48.1667	-91.1667	0.01	66	66	66	XRF	SEDIMENTARY	UNKNOWN	UNKNOWN	ARKOSE		69.3	0.28	17.1						0.06	1.21	2.5	5.04	2.2	0.06
W219579		USGS		Geochemistry of rock samples from the National Geochemical Database: U.S. Geological Survey, Reston, VA.	U.S. Geological Survey	USGS		48.1667	-91.1667	0.01	66	66	66	MISC	SEDIMENTARY	UNKNOWN	UNKNOWN	ARKOSE
W219579		USGS		Geochemistry of rock samples from the National Geochemical Database: U.S. Geological Survey, Reston, VA.	U.S. Geological Survey	USGS		48.1667	-91.1667	0.01	66	66	66	NAA	SEDIMENTARY	UNKNOWN	UNKNOWN	ARKOSE																					1.02			1.65			18
W219579		USGS		Geochemistry of rock samples from the National Geochemical Database: U.S. Geological Survey, Reston, VA.	U.S. Geological Survey	USGS		48.1667	-91.1667	0.01	66	66	66	UNKNOWN	SEDIMENTARY	UNKNOWN	UNKNOWN	ARKOSE								0.28
W219579		USGS		Geochemistry of rock samples from the National Geochemical Database: U.S. Geological Survey, Reston, VA.	U.S. Geological Survey	USGS		48.1667	-91.1667	0.01	66	66	66	XRF	SEDIMENTARY	UNKNOWN	UNKNOWN	ARKOSE		76.6	0.25	16.4							0.66	0.35	4.33	3.67
W219580		USGS		Geochemistry of rock samples from the National Geochemical Database: U.S. Geological Survey, Reston, VA.	U.S. Geological Survey	USGS		48.1667	-91.1667	0.01	66	66	66	MISC	SEDIMENTARY	UNKNOWN	UNKNOWN	ARKOSE
W219580		USGS		Geochemistry of rock samples from the National Geochemical Database: U.S. Geological Survey, Reston, VA.	U.S. Geological Survey	USGS		48.1667	-91.1667	0.01	66	66	66	NAA	SEDIMENTARY	UNKNOWN	UNKNOWN	ARKOSE																					1.36			6.6			30.8
W219580		USGS		Geochemistry of rock samples from the National Geochemical Database: U.S. Geological Survey, Reston, VA.	U.S. Geological Survey	USGS		48.1667	-91.1667	0.01	66	66	66	UNKNOWN	SEDIMENTARY	UNKNOWN	UNKNOWN	ARKOSE								0.4
W219580		USGS		Geochemistry of rock samples from the National Geochemical Database: U.S. Geological Survey, Reston, VA.	U.S. Geological Survey	USGS		48.1667	-91.1667	0.01	66	66	66	XRF	SEDIMENTARY	UNKNOWN	UNKNOWN	ARKOSE		68.1	0.25	18.4						0.04	0.98	1.11	5.31	3.45	0.09
W219581		USGS		Geochemistry of rock samples from the National Geochemical Database: U.S. Geological Survey, Reston, VA.	U.S. Geological Survey	USGS		48.1667	-91.1667	0.01	66	66	66	MISC	SEDIMENTARY	UNKNOWN	UNKNOWN	ARKOSE
W219581		USGS		Geochemistry of rock samples from the National Geochemical Database: U.S. Geological Survey, Reston, VA.	U.S. Geological Survey	USGS		48.1667	-91.1667	0.01	66	66	66	NAA	SEDIMENTARY	UNKNOWN	UNKNOWN	ARKOSE																					1.31			5.63			35.3
W219581		USGS		Geochemistry of rock samples from the National Geochemical Database: U.S. Geological Survey, Reston, VA.	U.S. Geological Survey	USGS		48.1667	-91.1667	0.01	66	66	66	UNKNOWN	SEDIMENTARY	UNKNOWN	UNKNOWN	ARKOSE								0.6
W219581		USGS		Geochemistry of rock samples from the National Geochemical Database: U.S. Geological Survey, Reston, VA.	U.S. Geological Survey	USGS		48.1667	-91.1667	0.01	66	66	66	XRF	SEDIMENTARY	UNKNOWN	UNKNOWN	ARKOSE		71.7	0.24	16.7						0.03	1.12	0.65	4.47	3.28	0.09
P-1		GEOROC	10.1016/j.lithos.2015.05.018	EVOLUTION OF LATE STAGE DIFFERENTIATES IN THE PALISADES SILL, NEW YORK AND NEW JERSEY	LITHOS	BLOCK, K. A.; STEINER, J. C.; PUFFER, J. H.; JONES, K. M.; GOLDSTEIN, S. L.		41.0414	-73.9176	1e-06				XRF	SEDIMENTARY			ARKOSE		61.64	0.8	18.02				6.29	6.28639		4.56	4.29	4.01	1.35
P-1		GEOROC	10.1016/j.lithos.2015.05.018	EVOLUTION OF LATE STAGE DIFFERENTIATES IN THE PALISADES SILL, NEW YORK AND NEW JERSEY	LITHOS	BLOCK, K. A.; STEINER, J. C.; PUFFER, J. H.; JONES, K. M.; GOLDSTEIN, S. L.		41.0414	-73.9176	1e-06				ICPMS	SEDIMENTARY			ARKOSE																								4
P-1		GEOROC	10.1016/j.lithos.2015.05.018	EVOLUTION OF LATE STAGE DIFFERENTIATES IN THE PALISADES SILL, NEW YORK AND NEW JERSEY	LITHOS	BLOCK, K. A.; STEINER, J. C.; PUFFER, J. H.; JONES, K. M.; GOLDSTEIN, S. L.		41.0414	-73.9176	1e-06				TIMS_ID	SEDIMENTARY			ARKOSE
P-1		GEOROC	10.1016/j.lithos.2015.05.018	EVOLUTION OF LATE STAGE DIFFERENTIATES IN THE PALISADES SILL, NEW YORK AND NEW JERSEY	LITHOS	BLOCK, K. A.; STEINER, J. C.; PUFFER, J. H.; JONES, K. M.; GOLDSTEIN, S. L.		41.0414	-73.9176	1e-06				TIMS	SEDIMENTARY			ARKOSE
P-2		GEOROC	10.1016/j.lithos.2015.05.018	EVOLUTION OF LATE STAGE DIFFERENTIATES IN THE PALISADES SILL, NEW YORK AND NEW JERSEY	LITHOS	BLOCK, K. A.; STEINER, J. C.; PUFFER, J. H.; JONES, K. M.; GOLDSTEIN, S. L.		41.0414	-73.9175	1e-06				XRF	SEDIMENTARY			ARKOSE		74.04	0.38	9.48				4.44	4.44384		1.99	8.51	1.73	0.91
P-2		GEOROC	10.1016/j.lithos.2015.05.018	EVOLUTION OF LATE STAGE DIFFERENTIATES IN THE PALISADES SILL, NEW YORK AND NEW JERSEY	LITHOS	BLOCK, K. A.; STEINER, J. C.; PUFFER, J. H.; JONES, K. M.; GOLDSTEIN, S. L.		41.0414	-73.9175	1e-06				ICPMS	SEDIMENTARY			ARKOSE																								5
P-2		GEOROC	10.1016/j.lithos.2015.05.018	EVOLUTION OF LATE STAGE DIFFERENTIATES IN THE PALISADES SILL, NEW YORK AND NEW JERSEY	LITHOS	BLOCK, K. A.; STEINER, J. C.; PUFFER, J. H.; JONES, K. M.; GOLDSTEIN, S. L.		41.0414	-73.9175	1e-06				TIMS_ID	SEDIMENTARY			ARKOSE
P-2		GEOROC	10.1016/j.lithos.2015.05.018	EVOLUTION OF LATE STAGE DIFFERENTIATES IN THE PALISADES SILL, NEW YORK AND NEW JERSEY	LITHOS	BLOCK, K. A.; STEINER, J. C.; PUFFER, J. H.; JONES, K. M.; GOLDSTEIN, S. L.		41.0414	-73.9175	1e-06				TIMS	SEDIMENTARY			ARKOSE
MG16		GEOROC	10.1016/j.gr.2020.09.006	MAGMATIC EVIDENCE FOR LATE CARBONIFEROUS-EARLY PERMIAN SLAB BREAKOFF AND EXTENSION OF THE SOUTHERN MONGOLIA COLLAGE SYSTEM IN CENTRAL ASIA	GONDWANA RES.	ZHOU, HAI; ZHAO, GUOCHUN; HAN, YIGUI; ZHANG, DONGHAI; ZHAO, QIAN; ORSOO, E.-O.; PEI, XIANZHI		43.1675	106.462	0.0001				XRF	SEDIMENTARY			ARKOSE		49.03	0.98	20.63			9.18			0.13	4.05	8.25	4.29	0.42	0.23
MG16		GEOROC	10.1016/j.gr.2020.09.006	MAGMATIC EVIDENCE FOR LATE CARBONIFEROUS-EARLY PERMIAN SLAB BREAKOFF AND EXTENSION OF THE SOUTHERN MONGOLIA COLLAGE SYSTEM IN CENTRAL ASIA	GONDWANA RES.	ZHOU, HAI; ZHAO, GUOCHUN; HAN, YIGUI; ZHANG, DONGHAI; ZHAO, QIAN; ORSOO, E.-O.; PEI, XIANZHI		43.1675	106.462	0.0001				IGN	SEDIMENTARY			ARKOSE																	1.97
MG16		GEOROC	10.1016/j.gr.2020.09.006	MAGMATIC EVIDENCE FOR LATE CARBONIFEROUS-EARLY PERMIAN SLAB BREAKOFF AND EXTENSION OF THE SOUTHERN MONGOLIA COLLAGE SYSTEM IN CENTRAL ASIA	GONDWANA RES.	ZHOU, HAI; ZHAO, GUOCHUN; HAN, YIGUI; ZHANG, DONGHAI; ZHAO, QIAN; ORSOO, E.-O.; PEI, XIANZHI		43.1675	106.462	0.0001				ICPMS	SEDIMENTARY			ARKOSE																						1034	26	24.8	132		81	1.92
[truncated: 79 more columns]

## Sheet: References
References
AUTHOR	YEAR	TITLE	JOURNAL
BLOCK, K. A.; STEINER, J. C.; PUFFER, J. H.; JONES, K. M.; GOLDSTEIN, S. L.	2015	EVOLUTION OF LATE STAGE DIFFERENTIATES IN THE PALISADES SILL, NEW YORK AND NEW JERSEY	LITHOS
BLOCK, K. A.; STEINER, J. C.; PUFFER, J. H.; JONES, K. M.; GOLDSTEIN, S. L.	2015	EVOLUTION OF LATE STAGE DIFFERENTIATES IN THE PALISADES SILL, NEW YORK AND NEW JERSEY	LITHOS
BONEV, N.; FILIPOV, P.; RAICHEVA, R.; MORITZ, R.	2022	DETRITAL ZIRCON AGE CONSTRAINTS FOR LATE PERMIAN TO LATE TRIASSIC CLASTIC SEDIMENTATION IN THE NORTHERN-WESTERN SAKAR-STRANDZHA ZONE, SE BULGARIA	INT. J. EARTH SCI. (GEOL. RUNDSCHAU)
BONEV, N.; FILIPOV, P.; RAICHEVA, R.; MORITZ, R.	2022	DETRITAL ZIRCON AGE CONSTRAINTS FOR LATE PERMIAN TO LATE TRIASSIC CLASTIC SEDIMENTATION IN THE NORTHERN-WESTERN SAKAR-STRANDZHA ZONE, SE BULGARIA	INT. J. EARTH SCI. (GEOL. RUNDSCHAU)
BONEV, N.; FILIPOV, P.; RAICHEVA, R.; MORITZ, R.	2022	DETRITAL ZIRCON AGE CONSTRAINTS FOR LATE PERMIAN TO LATE TRIASSIC CLASTIC SEDIMENTATION IN THE NORTHERN-WESTERN SAKAR-STRANDZHA ZONE, SE BULGARIA	INT. J. EARTH SCI. (GEOL. RUNDSCHAU)
BONEV, N.; FILIPOV, P.; RAICHEVA, R.; MORITZ, R.	2022	DETRITAL ZIRCON AGE CONSTRAINTS FOR LATE PERMIAN TO LATE TRIASSIC CLASTIC SEDIMENTATION IN THE NORTHERN-WESTERN SAKAR-STRANDZHA ZONE, SE BULGARIA	INT. J. EARTH SCI. (GEOL. RUNDSCHAU)
BONEV, N.; FILIPOV, P.; RAICHEVA, R.; MORITZ, R.	2022	DETRITAL ZIRCON AGE CONSTRAINTS FOR LATE PERMIAN TO LATE TRIASSIC CLASTIC SEDIMENTATION IN THE NORTHERN-WESTERN SAKAR-STRANDZHA ZONE, SE BULGARIA	INT. J. EARTH SCI. (GEOL. RUNDSCHAU)
BONEV, N.; FILIPOV, P.; RAICHEVA, R.; MORITZ, R.	2022	DETRITAL ZIRCON AGE CONSTRAINTS FOR LATE PERMIAN TO LATE TRIASSIC CLASTIC SEDIMENTATION IN THE NORTHERN-WESTERN SAKAR-STRANDZHA ZONE, SE BULGARIA	INT. J. EARTH SCI. (GEOL. RUNDSCHAU)
BONEV, N.; FILIPOV, P.; RAICHEVA, R.; MORITZ, R.	2022	DETRITAL ZIRCON AGE CONSTRAINTS FOR LATE PERMIAN TO LATE TRIASSIC CLASTIC SEDIMENTATION IN THE NORTHERN-WESTERN SAKAR-STRANDZHA ZONE, SE BULGARIA	INT. J. EARTH SCI. (GEOL. RUNDSCHAU)
BONEV, N.; FILIPOV, P.; RAICHEVA, R.; MORITZ, R.	2022	DETRITAL ZIRCON AGE CONSTRAINTS FOR LATE PERMIAN TO LATE TRIASSIC CLASTIC SEDIMENTATION IN THE NORTHERN-WESTERN SAKAR-STRANDZHA ZONE, SE BULGARIA	INT. J. EARTH SCI. (GEOL. RUNDSCHAU)
PEARCE, T. H.	1970	CHEMICAL VARIATIONS IN THE PALISADE SILL	J. PETROL.
PREDOVSKIY, A. A.; MELEZHIK, V. A.; BOLOTOV, V. I.; FEDOTOV, ZH. A.; BASALAEV, A. A.; KOZLOV, N. E.; IVANOV, A. A.	1987	PRECAMBRIAN VOLCANISM AND SEDIMENTOGENESIS IN THE NORTH-EASTERN PART OF THE BALTIC SHIELD
PREDOVSKIY, A. A.; MELEZHIK, V. A.; BOLOTOV, V. I.; FEDOTOV, ZH. A.; BASALAEV, A. A.; KOZLOV, N. E.; IVANOV, A. A.	1987	PRECAMBRIAN VOLCANISM AND SEDIMENTOGENESIS IN THE NORTH-EASTERN PART OF THE BALTIC SHIELD
SISSON, T. W.; SALTERS, V. J. M.; LARSON, P. B.	2014	PETROGENESIS OF MOUNT RAINIER ANDESITE: MAGMA FLUX AND GEOLOGIC CONTROLS ON THE CONTRASTING DIFFERENTIATION STYLES AT STRATOVOLCANOES OF THE SOUTHERN WASHINGTON CASCADES	BULL. GEOL. SOC. AM.
SISSON, T. W.; SALTERS, V. J. M.; LARSON, P. B.	2014	PETROGENESIS OF MOUNT RAINIER ANDESITE: MAGMA FLUX AND GEOLOGIC CONTROLS ON THE CONTRASTING DIFFERENTIATION STYLES AT STRATOVOLCANOES OF THE SOUTHERN WASHINGTON CASCADES	BULL. GEOL. SOC. AM.
SISSON, T. W.; SALTERS, V. J. M.; LARSON, P. B.	2014	PETROGENESIS OF MOUNT RAINIER ANDESITE: MAGMA FLUX AND GEOLOGIC CONTROLS ON THE CONTRASTING DIFFERENTIATION STYLES AT STRATOVOLCANOES OF THE SOUTHERN WASHINGTON CASCADES	BULL. GEOL. SOC. AM.
SISSON, T. W.; SALTERS, V. J. M.; LARSON, P. B.	2014	PETROGENESIS OF MOUNT RAINIER ANDESITE: MAGMA FLUX AND GEOLOGIC CONTROLS ON THE CONTRASTING DIFFERENTIATION STYLES AT STRATOVOLCANOES OF THE SOUTHERN WASHINGTON CASCADES	BULL. GEOL. SOC. AM.
USGS	2008	Geochemistry of rock samples from the National Geochemical Database: U.S. Geological Survey, Reston, VA.	U.S. Geological Survey
YANEZ, P.; RUIZ, J.; PATCHETT, P. J.; ORTEGA-GUTIERREZ, F.; GEHRELS, G. E.	1991	ISOTOPIC STUDIES OF THE ACATLAN COMPLEX, SOUTHERN MEXICO: IMPLICATIONS FOR PALEOZOIC NORTH AMERICAN TECTONICS	BULL. GEOL. SOC. AM.
YANEZ, P.; RUIZ, J.; PATCHETT, P. J.; ORTEGA-GUTIERREZ, F.; GEHRELS, G. E.	1991	ISOTOPIC STUDIES OF THE ACATLAN COMPLEX, SOUTHERN MEXICO: IMPLICATIONS FOR PALEOZOIC NORTH AMERICAN TECTONICS	BULL. GEOL. SOC. AM.
ZHOU, HAI; ZHAO, GUOCHUN; HAN, YIGUI; ZHANG, DONGHAI; ZHAO, QIAN; ORSOO, E.-O.; PEI, XIANZHI	2021	MAGMATIC EVIDENCE FOR LATE CARBONIFEROUS-EARLY PERMIAN SLAB BREAKOFF AND EXTENSION OF THE SOUTHERN MONGOLIA COLLAGE SYSTEM IN CENTRAL ASIA	GONDWANA RES.
